# Supplementary material for: Composition and organization of active centromere sequences in complex genomes
Source: PubMed Central journal article supplement (PMC3422206; doi:10.1186/1471-2164-13-324), 2012-07-20
Supplement: 1471-2164-13-324-S3.pdf [file 1471-2164-13-324-S3.pdf]

Supplemental Table 2: CanFam2 satellite bed file

| chr  | chrS    | chrE    | bp_span | satelliteName | tile_color | type    |
|------|---------|---------|---------|---------------|------------|---------|
| chr1 | 3000005 | 3001054 | 1050    | CarSat1       | red        | pericen |
| chr1 | 3001070 | 3002770 | 1701    | CarSat1       | red        | pericen |
| chr1 | 3002797 | 3003508 | 712     | CarSat1       | red        | pericen |
| chr1 | 3003535 | 3004246 | 712     | CarSat1       | red        | pericen |
| chr1 | 3004273 | 3005479 | 1207    | CarSat1       | red        | pericen |
| chr1 | 3005495 | 3007933 | 2439    | CarSat1       | red        | pericen |
| chr1 | 3007954 | 3009890 | 1937    | CarSat1       | red        | pericen |
| chr1 | 3009902 | 3010870 | 969     | CarSat1       | red        | pericen |
| chr1 | 3010887 | 3011497 | 611     | CarSat1       | red        | pericen |
| chr1 | 3011694 | 3012393 | 700     | CarSat1       | red        | pericen |
| chr1 | 3021112 | 3022045 | 934     | CarSat1       | red        | pericen |
| chr1 | 3022058 | 3022982 | 925     | CarSat1       | red        | pericen |
| chr1 | 3022996 | 3024025 | 1030    | SAT1_CF       | blue       | pericen |
| chr1 | 3027678 | 3028314 | 637     | CarSat1       | red        | pericen |
| chr1 | 3028341 | 3031750 | 3410    | CarSat1       | red        | pericen |
| chr1 | 3031764 | 3032648 | 885     | CarSat1       | red        | pericen |
| chr1 | 3032845 | 3032943 | 99      | CarSat1       | red        | pericen |
| chr1 | 3032957 | 3033555 | 599     | CarSat1       | red        | pericen |
| chr1 | 3037515 | 3038618 | 1104    | Sat2CF        | purple     | pericen |
| chr1 | 3037580 | 3038566 | 987     | Sat2CF        | purple     | pericen |
| chr1 | 3038812 | 3038947 | 136     | SAT1_CF       | blue       | pericen |
| chr1 | 3038979 | 3040041 | 1063    | SAT1_CF       | blue       | pericen |
| chr1 | 3040070 | 3040472 | 403     | CarSat1       | red        | pericen |
| chr1 | 3040491 | 3042272 | 1782    | CarSat1       | red        | pericen |
| chr1 | 3042306 | 3042713 | 408     | CarSat1       | red        | pericen |
| chr1 | 3051996 | 3052741 | 746     | CarSat1       | red        | pericen |
| chr1 | 3052762 | 3054354 | 1593    | CarSat1       | red        | pericen |
| chr1 | 3054375 | 3054515 | 141     | CarSat1       | red        | pericen |
| chr1 | 3056986 | 3058237 | 1252    | Sat2CF        | purple     | pericen |
| chr1 | 3073626 | 3074523 | 898     | Sat2CF        | purple     | pericen |
| chr1 | 3169146 | 3169999 | 854     | CarSat1       | red        | pericen |
| chr1 | 3170021 | 3170842 | 822     | CarSat1       | red        | pericen |
| chr1 | 3171028 | 3171376 | 349     | CarSat1       | red        | pericen |
| chr1 | 3192099 | 3192869 | 771     | Sat2CF        | purple     | pericen |
| chr1 | 3192188 | 3192854 | 667     | Sat2CF        | purple     | pericen |
| chr1 | 3212314 | 3213463 | 1150    | Sat78CF       | na         | pericen |
| chr1 | 3437128 | 3437263 | 136     | Carsat2       | orange     | pericen |
| chr1 | 3437150 | 3439750 | 2601    | CarSat1       | red        | pericen |
| chr1 | 3440928 | 3443291 | 2364    | CarSat1       | red        | pericen |
| chr1 | 3443477 | 3444367 | 891     | CarSat1       | red        | pericen |

|      |          |          |      |          |        |         |
|------|----------|----------|------|----------|--------|---------|
| chr1 | 3449097  | 3450615  | 1519 | CarSat1  | red    | pericen |
| chr1 | 3450632  | 3451597  | 966  | CarSat1  | red    | pericen |
| chr1 | 3451610  | 3452836  | 1227 | CarSat1  | red    | pericen |
| chr1 | 3452868  | 3453572  | 705  | CarSat1  | red    | pericen |
| chr1 | 3453748  | 3454615  | 868  | CarSat1  | red    | pericen |
| chr1 | 3454802  | 3455407  | 606  | CarSat1  | red    | pericen |
| chr1 | 3455420  | 3456659  | 1240 | CarSat1  | red    | pericen |
| chr1 | 3456852  | 3457474  | 623  | CarSat1  | red    | pericen |
| chr1 | 3458263  | 3458780  | 518  | CarSat1  | red    | pericen |
| chr1 | 3458997  | 3459126  | 130  | Carsat2  | orange | pericen |
| chr1 | 3459016  | 3461492  | 2477 | CarSat1  | red    | pericen |
| chr1 | 3461504  | 3463589  | 2086 | CarSat1  | red    | pericen |
| chr1 | 3465217  | 3465384  | 168  | CarSat1  | red    | pericen |
| chr1 | 3465572  | 3466728  | 1157 | CarSat1  | red    | pericen |
| chr1 | 3596351  | 3596490  | 140  | Sat18CF  | na     | pericen |
| chr1 | 3966489  | 3966602  | 114  | Sat49CF  | na     | pericen |
| chr1 | 3988513  | 3988600  | 88   | Sat43CF  | na     | pericen |
| chr1 | 4071468  | 4072830  | 1363 | Sat140CF | na     | pericen |
| chr1 | 4072562  | 4072861  | 300  | Sat140CF | na     | pericen |
| chr1 | 4266622  | 4266748  | 127  | Sat5CF   | stalk  | pericen |
| chr1 | 4512957  | 4513039  | 83   | Sat13CF  | na     | pericen |
| chr1 | 4584372  | 4584631  | 260  | Sat91CF  | na     | pericen |
| chr1 | 4607419  | 4607647  | 229  | Sat170CF | na     | pericen |
| chr1 | 4636446  | 4636574  | 129  | Sat5CF   | stalk  | pericen |
| chr1 | 5093351  | 5093421  | 71   | Sat5CF   | stalk  | na      |
| chr1 | 5916203  | 5916475  | 273  | Sat120CF | na     | na      |
| chr1 | 5942342  | 5942547  | 206  | Sat65CF  | na     | na      |
| chr1 | 5942397  | 5942624  | 228  | Sat86CF  | na     | na      |
| chr1 | 5942425  | 5942719  | 295  | Sat65CF  | na     | na      |
| chr1 | 5964203  | 5964311  | 109  | Carsat3  | green  | na      |
| chr1 | 6038235  | 6038335  | 101  | Carsat3  | green  | na      |
| chr1 | 6099492  | 6099695  | 204  | Sat102CF | na     | na      |
| chr1 | 6222953  | 6223187  | 235  | Sat5CF   | stalk  | na      |
| chr1 | 6223000  | 6223181  | 182  | Sat93CF  | na     | na      |
| chr1 | 6441256  | 6441325  | 70   | Sat63CF  | na     | na      |
| chr1 | 7905859  | 7906036  | 178  | Sat65CF  | na     | na      |
| chr1 | 17884491 | 17884768 | 278  | Sat17CF  | na     | na      |
| chr1 | 20354668 | 20354711 | 44   | Sat40CF  | na     | na      |
| chr1 | 21129007 | 21129061 | 55   | Sat22CF  | na     | na      |
| chr1 | 21956958 | 21957016 | 59   | Sat88CF  | na     | na      |
| chr1 | 23049267 | 23049440 | 174  | SAT1_CF  | blue   | na      |
| chr1 | 23755927 | 23757348 | 1422 | Sat132CF | na     | na      |

|      |          |          |               |       |    |
|------|----------|----------|---------------|-------|----|
| chr1 | 26880011 | 26881850 | 1840 Sat55CF  | na    | na |
| chr1 | 26881923 | 26881952 | 30 Sat39CF    | na    | na |
| chr1 | 26882759 | 26884222 | 1464 Sat39CF  | na    | na |
| chr1 | 26884292 | 26884543 | 252 Sat39CF   | na    | na |
| chr1 | 26884296 | 26884620 | 325 Sat38CF   | na    | na |
| chr1 | 26893527 | 26895268 | 1742 Sat86CF  | na    | na |
| chr1 | 27657904 | 27658007 | 104 Sat169CF  | na    | na |
| chr1 | 27657918 | 27659065 | 1148 Sat169CF | na    | na |
| chr1 | 27659022 | 27659070 | 49 Sat169CF   | na    | na |
| chr1 | 27709453 | 27709630 | 178 Sat37CF   | na    | na |
| chr1 | 27710265 | 27710420 | 156 Sat37CF   | na    | na |
| chr1 | 27738445 | 27738760 | 316 Sat34CF   | na    | na |
| chr1 | 30048883 | 30048937 | 55 Sat21CF    | na    | na |
| chr1 | 32497340 | 32497378 | 39 Sat5CF     | stalk | na |
| chr1 | 33626633 | 33626837 | 205 Sat17CF   | na    | na |
| chr1 | 34751290 | 34751365 | 76 Sat46CF    | na    | na |
| chr1 | 40712618 | 40712659 | 42 Sat36CF    | na    | na |
| chr1 | 41651010 | 41651057 | 48 Sat27CF    | na    | na |
| chr1 | 48803534 | 48803580 | 47 Sat41CF    | na    | na |
| chr1 | 49611233 | 49611277 | 45 Sat76CF    | na    | na |
| chr1 | 50694257 | 50694307 | 51 CarSat1    | red   | na |
| chr1 | 54297071 | 54297113 | 43 Sat140CF   | na    | na |
| chr1 | 55040309 | 55040395 | 87 Sat102CF   | na    | na |
| chr1 | 56773850 | 56773977 | 128 Sat141CF  | na    | na |
| chr1 | 56998588 | 56998717 | 130 Sat37CF   | na    | na |
| chr1 | 57064994 | 57065061 | 68 Sat18CF    | na    | na |
| chr1 | 57070447 | 57070639 | 193 Sat47CF   | na    | na |
| chr1 | 57365368 | 57365550 | 183 Sat93CF   | na    | na |
| chr1 | 57399798 | 57399894 | 97 Sat181CF   | na    | na |
| chr1 | 57399895 | 57400956 | 1062 Sat181CF | na    | na |
| chr1 | 57400957 | 57401015 | 59 Sat181CF   | na    | na |
| chr1 | 57401168 | 57401373 | 206 Sat181CF  | na    | na |
| chr1 | 58076304 | 58076568 | 265 Sat47CF   | na    | na |
| chr1 | 58076309 | 58076541 | 233 Sat85CF   | na    | na |
| chr1 | 58378757 | 58378912 | 156 Sat79CF   | na    | na |
| chr1 | 58679694 | 58679920 | 227 Sat171CF  | na    | na |
| chr1 | 59738934 | 59739091 | 158 Sat146CF  | na    | na |
| chr1 | 70048687 | 70048745 | 59 Sat107CF   | na    | na |
| chr1 | 70516005 | 70516154 | 150 Sat112CF  | na    | na |
| chr1 | 71383054 | 71383215 | 162 Sat5CF    | stalk | na |
| chr1 | 71646925 | 71647684 | 760 Sat96CF   | na    | na |
| chr1 | 72082906 | 72083073 | 168 Sat16CF   | na    | na |

|      |          |          |              |        |    |
|------|----------|----------|--------------|--------|----|
| chr1 | 72131928 | 72132085 | 158 Sat150CF | na     | na |
| chr1 | 72319446 | 72319491 | 46 Sat52CF   | na     | na |
| chr1 | 72442735 | 72442912 | 178 Sat130CF | na     | na |
| chr1 | 72598755 | 72601699 | 2945 SAT1_CF | blue   | na |
| chr1 | 72601744 | 72602478 | 735 SAT1_CF  | blue   | na |
| chr1 | 72602491 | 72603795 | 1305 CarSat1 | red    | na |
| chr1 | 72610096 | 72610224 | 129 CarSat1  | red    | na |
| chr1 | 72643333 | 72644823 | 1491 CarSat1 | red    | na |
| chr1 | 72644844 | 72646701 | 1858 CarSat1 | red    | na |
| chr1 | 72646731 | 72648530 | 1800 CarSat1 | red    | na |
| chr1 | 72648551 | 72648792 | 242 CarSat1  | red    | na |
| chr1 | 72648973 | 72649532 | 560 CarSat1  | red    | na |
| chr1 | 72649546 | 72649749 | 204 CarSat1  | red    | na |
| chr1 | 72649933 | 72651773 | 1841 CarSat1 | red    | na |
| chr1 | 72651808 | 72654910 | 3103 CarSat1 | red    | na |
| chr1 | 72654968 | 72656243 | 1276 CarSat1 | red    | na |
| chr1 | 72656275 | 72656983 | 709 CarSat1  | red    | na |
| chr1 | 72657018 | 72657708 | 691 CarSat1  | red    | na |
| chr1 | 72657719 | 72658444 | 726 CarSat1  | red    | na |
| chr1 | 72658456 | 72659185 | 730 CarSat1  | red    | na |
| chr1 | 72659198 | 72660142 | 945 CarSat1  | red    | na |
| chr1 | 72666424 | 72667248 | 825 CarSat1  | red    | na |
| chr1 | 72667274 | 72669679 | 2406 CarSat1 | red    | na |
| chr1 | 72669692 | 72670928 | 1237 CarSat1 | red    | na |
| chr1 | 72671101 | 72674244 | 3144 CarSat1 | red    | na |
| chr1 | 72674266 | 72674855 | 590 CarSat1  | red    | na |
| chr1 | 72675017 | 72675410 | 394 CarSat1  | red    | na |
| chr1 | 72678438 | 72678565 | 128 Carsat2  | orange | na |
| chr1 | 72678454 | 72680037 | 1584 CarSat1 | red    | na |
| chr1 | 72692981 | 72694139 | 1159 Carsat2 | orange | na |
| chr1 | 72694139 | 72694255 | 117 CarSat1  | red    | na |
| chr1 | 72694435 | 72694792 | 358 CarSat1  | red    | na |
| chr1 | 72694825 | 72696407 | 1583 Carsat2 | orange | na |
| chr1 | 72703532 | 72706848 | 3317 Carsat2 | orange | na |
| chr1 | 72743751 | 72743873 | 123 Carsat3  | green  | na |
| chr1 | 72744048 | 72744198 | 151 Carsat3  | green  | na |
| chr1 | 72744218 | 72746321 | 2104 Carsat3 | green  | na |
| chr1 | 72746737 | 72746817 | 81 Carsat3   | green  | na |
| chr1 | 72790024 | 72790065 | 42 Sat91CF   | na     | na |
| chr1 | 73016153 | 73016221 | 69 Sat33CF   | na     | na |
| chr1 | 73161879 | 73162014 | 136 Carsat3  | green  | na |
| chr1 | 73162228 | 73163545 | 1318 Carsat3 | green  | na |

|      |           |           |      |           |        |    |
|------|-----------|-----------|------|-----------|--------|----|
| chr1 | 73231371  | 73232918  | 1548 | Carsat3   | green  | na |
| chr1 | 73535114  | 73535220  | 107  | Carsat3   | green  | na |
| chr1 | 73674731  | 73675016  | 286  | Sat47CF   | na     | na |
| chr1 | 74394507  | 74394864  | 358  | Sat8CF    | dgreen | na |
| chr1 | 74396636  | 74396755  | 120  | Sat8CF    | dgreen | na |
| chr1 | 74396815  | 74397000  | 186  | Sat8CF    | dgreen | na |
| chr1 | 75386635  | 75386671  | 37   | Sat45CF   | na     | na |
| chr1 | 77185775  | 77185867  | 93   | Sat63CF   | na     | na |
| chr1 | 77796299  | 77796348  | 50   | Sat18CF   | na     | na |
| chr1 | 79634562  | 79634797  | 236  | Carsat3   | green  | na |
| chr1 | 80117048  | 80117092  | 45   | Sat22CF   | na     | na |
| chr1 | 80493201  | 80493295  | 95   | Sat88CF   | na     | na |
| chr1 | 92117334  | 92117495  | 162  | SUBTEL_sa | na     | na |
| chr1 | 96683677  | 96683897  | 221  | Sat17CF   | na     | na |
| chr1 | 97057527  | 97057806  | 280  | Carsat3   | green  | na |
| chr1 | 97057821  | 97058776  | 956  | Carsat3   | green  | na |
| chr1 | 97280789  | 97280871  | 83   | Sat16CF   | na     | na |
| chr1 | 98434580  | 98434971  | 392  | Sat30CF   | na     | na |
| chr1 | 99600496  | 99600683  | 188  | Sat5CF    | stalk  | na |
| chr1 | 99600579  | 99600682  | 104  | Sat5CF    | stalk  | na |
| chr1 | 99919695  | 99919846  | 152  | Sat57CF   | na     | na |
| chr1 | 100047620 | 100049392 | 1773 | Sat89CF   | na     | na |
| chr1 | 100049249 | 100049418 | 170  | Sat89CF   | na     | na |
| chr1 | 100207475 | 100207526 | 52   | Sat43CF   | na     | na |
| chr1 | 100524675 | 100524749 | 75   | Sat27CF   | na     | na |
| chr1 | 100880304 | 100880453 | 150  | Carsat3   | green  | na |
| chr1 | 100880625 | 100880873 | 249  | Carsat3   | green  | na |
| chr1 | 100880965 | 100881348 | 384  | Carsat3   | green  | na |
| chr1 | 101335915 | 101336167 | 253  | Sat106CF  | na     | na |
| chr1 | 101467699 | 101467868 | 170  | Sat89CF   | na     | na |
| chr1 | 101467725 | 101468696 | 972  | Sat89CF   | na     | na |
| chr1 | 101471252 | 101472064 | 813  | Sat89CF   | na     | na |
| chr1 | 102233191 | 102235026 | 1836 | Carsat3   | green  | na |
| chr1 | 102239651 | 102239776 | 126  | Carsat3   | green  | na |
| chr1 | 102246856 | 102247453 | 598  | Carsat3   | green  | na |
| chr1 | 102247502 | 102247745 | 244  | Carsat3   | green  | na |
| chr1 | 102376651 | 102376883 | 233  | SAT1_CF   | blue   | na |
| chr1 | 102382742 | 102382939 | 198  | Sat2CF    | purple | na |
| chr1 | 102382749 | 102382992 | 244  | Sat2CF    | purple | na |
| chr1 | 102391074 | 102391300 | 227  | Sat2CF    | purple | na |
| chr1 | 102391114 | 102391342 | 229  | Sat2CF    | purple | na |
| chr1 | 102418460 | 102420754 | 2295 | Carsat2   | orange | na |

|      |           |           |      |         |       |    |
|------|-----------|-----------|------|---------|-------|----|
| chr1 | 102433732 | 102433872 | 141  | Carsat3 | green | na |
| chr1 | 102433975 | 102434525 | 551  | Carsat3 | green | na |
| chr1 | 102434555 | 102435022 | 468  | Carsat3 | green | na |
| chr1 | 102464634 | 102464807 | 174  | Carsat3 | green | na |
| chr1 | 102465498 | 102465639 | 142  | Carsat3 | green | na |
| chr1 | 102519001 | 102519105 | 105  | Carsat3 | green | na |
| chr1 | 102519134 | 102519770 | 637  | Carsat3 | green | na |
| chr1 | 102536788 | 102536858 | 71   | Carsat3 | green | na |
| chr1 | 102537026 | 102537121 | 96   | Carsat3 | green | na |
| chr1 | 102537347 | 102537772 | 426  | Carsat3 | green | na |
| chr1 | 102537998 | 102538104 | 107  | Carsat3 | green | na |
| chr1 | 102538683 | 102538745 | 63   | Carsat3 | green | na |
| chr1 | 102538936 | 102539033 | 98   | Carsat3 | green | na |
| chr1 | 102553452 | 102554494 | 1043 | Carsat3 | green | na |
| chr1 | 102557322 | 102557457 | 136  | Carsat3 | green | na |
| chr1 | 102565393 | 102566808 | 1416 | Carsat3 | green | na |
| chr1 | 102588169 | 102588841 | 673  | Carsat3 | green | na |
| chr1 | 102605129 | 102605401 | 273  | Carsat3 | green | na |
| chr1 | 102605563 | 102606137 | 575  | Carsat3 | green | na |
| chr1 | 102613033 | 102613133 | 101  | Carsat3 | green | na |
| chr1 | 102645136 | 102645252 | 117  | Carsat3 | green | na |
| chr1 | 102645407 | 102645620 | 214  | Carsat3 | green | na |
| chr1 | 102645739 | 102645902 | 164  | Carsat3 | green | na |
| chr1 | 102655904 | 102656031 | 128  | Carsat3 | green | na |
| chr1 | 102681200 | 102681875 | 676  | Carsat3 | green | na |
| chr1 | 102691219 | 102691523 | 305  | Carsat3 | green | na |
| chr1 | 102691575 | 102691804 | 230  | Carsat3 | green | na |
| chr1 | 102698564 | 102698950 | 387  | Carsat3 | green | na |
| chr1 | 102698988 | 102699548 | 561  | Carsat3 | green | na |
| chr1 | 102699638 | 102699971 | 334  | Carsat3 | green | na |
| chr1 | 102701175 | 102701218 | 44   | Sat70CF | na    | na |
| chr1 | 102714023 | 102714487 | 465  | Carsat3 | green | na |
| chr1 | 102737929 | 102739177 | 1249 | Carsat3 | green | na |
| chr1 | 102753046 | 102753437 | 392  | Carsat3 | green | na |
| chr1 | 102753455 | 102753628 | 174  | Carsat3 | green | na |
| chr1 | 102765623 | 102766132 | 510  | Carsat3 | green | na |
| chr1 | 102796122 | 102796377 | 256  | Carsat3 | green | na |
| chr1 | 102796618 | 102796759 | 142  | Carsat3 | green | na |
| chr1 | 102831788 | 102832914 | 1127 | Carsat3 | green | na |
| chr1 | 102858904 | 102859241 | 338  | Carsat3 | green | na |
| chr1 | 102859355 | 102859519 | 165  | Carsat3 | green | na |
| chr1 | 102888914 | 102890247 | 1334 | Carsat3 | green | na |

|      |           |           |              |       |    |
|------|-----------|-----------|--------------|-------|----|
| chr1 | 102943490 | 102943679 | 190 Sat17CF  | na    | na |
| chr1 | 102945781 | 102946437 | 657 Carsat3  | green | na |
| chr1 | 102983645 | 102983780 | 136 Carsat3  | green | na |
| chr1 | 102983810 | 102985102 | 1293 Carsat3 | green | na |
| chr1 | 102985237 | 102985329 | 93 Carsat3   | green | na |
| chr1 | 103030735 | 103030874 | 140 Carsat3  | green | na |
| chr1 | 103031052 | 103032169 | 1118 Carsat3 | green | na |
| chr1 | 103048570 | 103048690 | 121 Carsat3  | green | na |
| chr1 | 103048745 | 103049246 | 502 Carsat3  | green | na |
| chr1 | 103049422 | 103049713 | 292 Carsat3  | green | na |
| chr1 | 103079392 | 103080266 | 875 Carsat3  | green | na |
| chr1 | 103106719 | 103108355 | 1637 Carsat3 | green | na |
| chr1 | 103127658 | 103127802 | 145 Carsat3  | green | na |
| chr1 | 103127962 | 103128243 | 282 Carsat3  | green | na |
| chr1 | 103128433 | 103129842 | 1410 Carsat3 | green | na |
| chr1 | 103146550 | 103146852 | 303 Carsat3  | green | na |
| chr1 | 103147020 | 103149031 | 2012 Carsat3 | green | na |
| chr1 | 103168534 | 103168900 | 367 Carsat3  | green | na |
| chr1 | 103168919 | 103171732 | 2814 Carsat3 | green | na |
| chr1 | 103178055 | 103178184 | 130 Carsat3  | green | na |
| chr1 | 103178843 | 103179035 | 193 Carsat3  | green | na |
| chr1 | 103179611 | 103179820 | 210 Carsat3  | green | na |
| chr1 | 103230705 | 103232460 | 1756 Carsat3 | green | na |
| chr1 | 103261494 | 103261722 | 229 Carsat3  | green | na |
| chr1 | 103261733 | 103263770 | 2038 Carsat3 | green | na |
| chr1 | 103325141 | 103325945 | 805 Carsat3  | green | na |
| chr1 | 103350690 | 103351694 | 1005 Carsat3 | green | na |
| chr1 | 103386279 | 103387076 | 798 Carsat3  | green | na |
| chr1 | 103423671 | 103424454 | 784 Carsat3  | green | na |
| chr1 | 103424465 | 103424570 | 106 Carsat3  | green | na |
| chr1 | 103450354 | 103451095 | 742 Carsat3  | green | na |
| chr1 | 103451108 | 103451400 | 293 Carsat3  | green | na |
| chr1 | 103476495 | 103476666 | 172 Carsat3  | green | na |
| chr1 | 103491894 | 103492764 | 871 Carsat3  | green | na |
| chr1 | 103492802 | 103493078 | 277 Carsat3  | green | na |
| chr1 | 103510977 | 103512407 | 1431 Carsat3 | green | na |
| chr1 | 103534677 | 103534953 | 277 Carsat3  | green | na |
| chr1 | 103534991 | 103535864 | 874 Carsat3  | green | na |
| chr1 | 103551664 | 103551835 | 172 Carsat3  | green | na |
| chr1 | 103573903 | 103574832 | 930 Carsat3  | green | na |
| chr1 | 103591260 | 103591988 | 729 Carsat3  | green | na |
| chr1 | 103592123 | 103592219 | 97 Carsat3   | green | na |

|      |           |           |      |         |       |    |
|------|-----------|-----------|------|---------|-------|----|
| chr1 | 103620380 | 103621453 | 1074 | Carsat3 | green | na |
| chr1 | 103638168 | 103638559 | 392  | Carsat3 | green | na |
| chr1 | 103638586 | 103639646 | 1061 | Carsat3 | green | na |
| chr1 | 103675479 | 103675949 | 471  | Carsat3 | green | na |
| chr1 | 103675985 | 103676161 | 177  | Carsat3 | green | na |
| chr1 | 103693347 | 103694383 | 1037 | Carsat3 | green | na |
| chr1 | 103715165 | 103715862 | 698  | Carsat3 | green | na |
| chr1 | 103745472 | 103746411 | 940  | Carsat3 | green | na |
| chr1 | 103754112 | 103754391 | 280  | Carsat3 | green | na |
| chr1 | 103754503 | 103754662 | 160  | Carsat3 | green | na |
| chr1 | 103754735 | 103754879 | 145  | Carsat3 | green | na |
| chr1 | 103771815 | 103771912 | 98   | Carsat3 | green | na |
| chr1 | 103772063 | 103773279 | 1217 | Carsat3 | green | na |
| chr1 | 103795382 | 103796414 | 1033 | Carsat3 | green | na |
| chr1 | 103813664 | 103814957 | 1294 | Carsat3 | green | na |
| chr1 | 103835981 | 103836075 | 95   | Carsat3 | green | na |
| chr1 | 103836087 | 103836267 | 181  | Carsat3 | green | na |
| chr1 | 103836301 | 103836420 | 120  | Carsat3 | green | na |
| chr1 | 103836461 | 103836640 | 180  | Carsat3 | green | na |
| chr1 | 103855873 | 103857323 | 1451 | Carsat3 | green | na |
| chr1 | 103883785 | 103883860 | 76   | Carsat3 | green | na |
| chr1 | 103883977 | 103885207 | 1231 | Carsat3 | green | na |
| chr1 | 103922932 | 103924141 | 1210 | Carsat3 | green | na |
| chr1 | 103979895 | 103980429 | 535  | Carsat3 | green | na |
| chr1 | 103980807 | 103981125 | 319  | Carsat3 | green | na |
| chr1 | 103982219 | 103982514 | 296  | Carsat3 | green | na |
| chr1 | 104192627 | 104193383 | 757  | Carsat3 | green | na |
| chr1 | 104194093 | 104194222 | 130  | Carsat3 | green | na |
| chr1 | 104194965 | 104195064 | 100  | Carsat3 | green | na |
| chr1 | 104195190 | 104195266 | 77   | Carsat3 | green | na |
| chr1 | 104195317 | 104195446 | 130  | Carsat3 | green | na |
| chr1 | 104195464 | 104195587 | 124  | Carsat3 | green | na |
| chr1 | 104227011 | 104227560 | 550  | Carsat3 | green | na |
| chr1 | 104227691 | 104227908 | 218  | Carsat3 | green | na |
| chr1 | 104256760 | 104257017 | 258  | Carsat3 | green | na |
| chr1 | 104257109 | 104257324 | 216  | Carsat3 | green | na |
| chr1 | 104269197 | 104269291 | 95   | Carsat3 | green | na |
| chr1 | 104269335 | 104270043 | 709  | Carsat3 | green | na |
| chr1 | 104433860 | 104434084 | 225  | Carsat3 | green | na |
| chr1 | 104434439 | 104434658 | 220  | Carsat3 | green | na |
| chr1 | 104434691 | 104435107 | 417  | Carsat3 | green | na |
| chr1 | 104472334 | 104472486 | 153  | Carsat3 | green | na |



|      |           |           |      |         |       |    |
|------|-----------|-----------|------|---------|-------|----|
| chr1 | 104472617 | 104472723 | 107  | Carsat3 | green | na |
| chr1 | 104472784 | 104472954 | 171  | Carsat3 | green | na |
| chr1 | 104480766 | 104481868 | 1103 | Carsat3 | green | na |
| chr1 | 104510235 | 104511672 | 1438 | Carsat3 | green | na |
| chr1 | 104531478 | 104532754 | 1277 | Carsat3 | green | na |
| chr1 | 104559866 | 104560554 | 689  | Carsat3 | green | na |
| chr1 | 104560569 | 104561406 | 838  | Carsat3 | green | na |
| chr1 | 104587857 | 104588524 | 668  | Carsat3 | green | na |
| chr1 | 104588712 | 104588937 | 226  | Carsat3 | green | na |
| chr1 | 104610615 | 104610766 | 152  | Carsat3 | green | na |
| chr1 | 104610848 | 104611162 | 315  | Carsat3 | green | na |
| chr1 | 104611220 | 104611514 | 295  | Carsat3 | green | na |
| chr1 | 104625686 | 104626741 | 1056 | Carsat3 | green | na |
| chr1 | 104649929 | 104650065 | 137  | Sat5CF  | stalk | na |
| chr1 | 104663841 | 104664863 | 1023 | Carsat3 | green | na |
| chr1 | 104680420 | 104681304 | 885  | Carsat3 | green | na |
| chr1 | 104681317 | 104681837 | 521  | Carsat3 | green | na |
| chr1 | 104784903 | 104785016 | 114  | Carsat3 | green | na |
| chr1 | 104785076 | 104785180 | 105  | Carsat3 | green | na |
| chr1 | 105263952 | 105264195 | 244  | Sat18CF | na    | na |
| chr1 | 106318691 | 106319363 | 673  | Sat74CF | na    | na |
| chr1 | 106318835 | 106319369 | 535  | Sat74CF | na    | na |
| chr1 | 106592996 | 106594082 | 1087 | Carsat3 | green | na |
| chr1 | 106668358 | 106668520 | 163  | Carsat3 | green | na |
| chr1 | 106668806 | 106668916 | 111  | Carsat3 | green | na |
| chr1 | 106697037 | 106697166 | 130  | Carsat3 | green | na |
| chr1 | 106697510 | 106697967 | 458  | Carsat3 | green | na |
| chr1 | 106698090 | 106698283 | 194  | Carsat3 | green | na |
| chr1 | 106811166 | 106811400 | 235  | Carsat3 | green | na |
| chr1 | 106811466 | 106812848 | 1383 | Carsat3 | green | na |
| chr1 | 106830192 | 106830408 | 217  | Carsat3 | green | na |
| chr1 | 106869827 | 106869989 | 163  | Carsat3 | green | na |
| chr1 | 106870252 | 106870438 | 187  | Carsat3 | green | na |
| chr1 | 106889640 | 106891010 | 1371 | Carsat3 | green | na |
| chr1 | 106922533 | 106922672 | 140  | Carsat3 | green | na |
| chr1 | 106922964 | 106923061 | 98   | Carsat3 | green | na |
| chr1 | 106942876 | 106944608 | 1733 | Carsat3 | green | na |
| chr1 | 106944637 | 106944746 | 110  | Carsat3 | green | na |
| chr1 | 106989896 | 106991448 | 1553 | Carsat3 | green | na |
| chr1 | 107006305 | 107006512 | 208  | Carsat3 | green | na |
| chr1 | 107006557 | 107006849 | 293  | Carsat3 | green | na |
| chr1 | 107007103 | 107007242 | 140  | Carsat3 | green | na |

|      |           |           |      |         |       |    |
|------|-----------|-----------|------|---------|-------|----|
| chr1 | 107028213 | 107028335 | 123  | Carsat3 | green | na |
| chr1 | 107041461 | 107043557 | 2097 | Carsat3 | green | na |
| chr1 | 107045190 | 107045316 | 127  | Carsat3 | green | na |
| chr1 | 107055599 | 107055806 | 208  | Carsat3 | green | na |
| chr1 | 107055820 | 107056221 | 402  | Carsat3 | green | na |
| chr1 | 107056399 | 107056538 | 140  | Carsat3 | green | na |
| chr1 | 107086669 | 107086793 | 125  | Carsat3 | green | na |
| chr1 | 107086987 | 107088208 | 1222 | Carsat3 | green | na |
| chr1 | 107101972 | 107102179 | 208  | Carsat3 | green | na |
| chr1 | 107102217 | 107102463 | 247  | Carsat3 | green | na |
| chr1 | 107124384 | 107124502 | 119  | Carsat3 | green | na |
| chr1 | 107124876 | 107125726 | 851  | Carsat3 | green | na |
| chr1 | 107172259 | 107172521 | 263  | Carsat3 | green | na |
| chr1 | 107172576 | 107174003 | 1428 | Carsat3 | green | na |
| chr1 | 107174030 | 107174156 | 127  | Carsat3 | green | na |
| chr1 | 107187349 | 107187469 | 121  | Carsat3 | green | na |
| chr1 | 107187562 | 107187802 | 241  | Carsat3 | green | na |
| chr1 | 107188022 | 107188129 | 108  | Carsat3 | green | na |
| chr1 | 107213945 | 107214076 | 132  | Carsat3 | green | na |
| chr1 | 107225331 | 107225564 | 234  | Carsat3 | green | na |
| chr1 | 107225733 | 107227169 | 1437 | Carsat3 | green | na |
| chr1 | 107235103 | 107235311 | 209  | Carsat3 | green | na |
| chr1 | 107235349 | 107235649 | 301  | Carsat3 | green | na |
| chr1 | 107274956 | 107276954 | 1999 | Carsat3 | green | na |
| chr1 | 107291449 | 107291656 | 208  | Carsat3 | green | na |
| chr1 | 107291694 | 107291954 | 261  | Carsat3 | green | na |
| chr1 | 107314168 | 107314401 | 234  | Carsat3 | green | na |
| chr1 | 107314486 | 107315624 | 1139 | Carsat3 | green | na |
| chr1 | 107327321 | 107327529 | 209  | Carsat3 | green | na |
| chr1 | 107327567 | 107327790 | 224  | Carsat3 | green | na |
| chr1 | 107354860 | 107355697 | 838  | Carsat3 | green | na |
| chr1 | 107400897 | 107401080 | 184  | Carsat3 | green | na |
| chr1 | 107401351 | 107401445 | 95   | Carsat3 | green | na |
| chr1 | 107401488 | 107403003 | 1516 | Carsat3 | green | na |
| chr1 | 107403125 | 107403251 | 127  | Carsat3 | green | na |
| chr1 | 107415959 | 107416491 | 533  | Carsat3 | green | na |
| chr1 | 107449809 | 107449885 | 77   | Carsat3 | green | na |
| chr1 | 107450185 | 107450971 | 787  | Carsat3 | green | na |
| chr1 | 107450998 | 107451133 | 136  | Carsat3 | green | na |
| chr1 | 107550116 | 107550209 | 94   | Carsat3 | green | na |
| chr1 | 107550278 | 107550985 | 708  | Carsat3 | green | na |
| chr1 | 107572059 | 107572145 | 87   | Carsat3 | green | na |

|      |           |           |      |         |       |    |
|------|-----------|-----------|------|---------|-------|----|
| chr1 | 107574643 | 107575903 | 1261 | Carsat3 | green | na |
| chr1 | 107683502 | 107684796 | 1295 | Carsat3 | green | na |
| chr1 | 107684883 | 107685048 | 166  | Carsat3 | green | na |
| chr1 | 107685276 | 107685342 | 67   | Carsat3 | green | na |
| chr1 | 107703730 | 107703840 | 111  | Carsat3 | green | na |
| chr1 | 107704016 | 107704910 | 895  | Carsat3 | green | na |
| chr1 | 107704925 | 107705822 | 898  | Carsat3 | green | na |
| chr1 | 107726186 | 107726313 | 128  | Carsat3 | green | na |
| chr1 | 107750926 | 107752306 | 1381 | Carsat3 | green | na |
| chr1 | 107791936 | 107792192 | 257  | Carsat3 | green | na |
| chr1 | 107792205 | 107792895 | 691  | Carsat3 | green | na |
| chr1 | 108001915 | 108002083 | 169  | Carsat3 | green | na |
| chr1 | 108002098 | 108002978 | 881  | Carsat3 | green | na |
| chr1 | 108019574 | 108019780 | 207  | Carsat3 | green | na |
| chr1 | 108019994 | 108021603 | 1610 | Carsat3 | green | na |
| chr1 | 108038555 | 108038649 | 95   | Carsat3 | green | na |
| chr1 | 108038759 | 108038832 | 74   | Carsat3 | green | na |
| chr1 | 108039223 | 108040448 | 1226 | Carsat3 | green | na |
| chr1 | 108059867 | 108060009 | 143  | Carsat3 | green | na |
| chr1 | 108060062 | 108061535 | 1474 | Carsat3 | green | na |
| chr1 | 108077906 | 108078771 | 866  | Carsat3 | green | na |
| chr1 | 108090274 | 108090394 | 121  | Carsat3 | green | na |
| chr1 | 108090570 | 108090758 | 189  | Carsat3 | green | na |
| chr1 | 108090919 | 108092000 | 1082 | Carsat3 | green | na |
| chr1 | 108115456 | 108115580 | 125  | Carsat3 | green | na |
| chr1 | 108115789 | 108116829 | 1041 | Carsat3 | green | na |
| chr1 | 108131616 | 108133049 | 1434 | Carsat3 | green | na |
| chr1 | 108161999 | 108163014 | 1016 | Carsat3 | green | na |
| chr1 | 108163248 | 108163372 | 125  | Carsat3 | green | na |
| chr1 | 108179364 | 108180611 | 1248 | Carsat3 | green | na |
| chr1 | 108180622 | 108180998 | 377  | Carsat3 | green | na |
| chr1 | 108181447 | 108181591 | 145  | Carsat3 | green | na |
| chr1 | 108202748 | 108204514 | 1767 | Carsat3 | green | na |
| chr1 | 108212720 | 108213045 | 326  | Carsat3 | green | na |
| chr1 | 108213056 | 108213185 | 130  | Carsat3 | green | na |
| chr1 | 108213362 | 108214002 | 641  | Carsat3 | green | na |
| chr1 | 108214174 | 108214324 | 151  | Carsat3 | green | na |
| chr1 | 108324771 | 108324849 | 79   | Sat43CF | na    | na |
| chr1 | 108339240 | 108339318 | 79   | Sat43CF | na    | na |
| chr1 | 108383905 | 108385325 | 1421 | Carsat3 | green | na |
| chr1 | 108511623 | 108511707 | 85   | Sat42CF | na    | na |
| chr1 | 108882454 | 108882835 | 382  | Sat55CF | na    | na |

|      |           |           |      |         |       |    |
|------|-----------|-----------|------|---------|-------|----|
| chr1 | 108882639 | 108882867 | 229  | Sat55CF | na    | na |
| chr1 | 109173980 | 109174112 | 133  | Sat98CF | na    | na |
| chr1 | 109421299 | 109422768 | 1470 | Carsat3 | green | na |
| chr1 | 109439204 | 109440146 | 943  | Carsat3 | green | na |
| chr1 | 109440171 | 109440652 | 482  | Carsat3 | green | na |
| chr1 | 109440739 | 109441229 | 491  | Carsat3 | green | na |
| chr1 | 109648845 | 109648888 | 44   | Sat13CF | na    | na |
| chr1 | 109786651 | 109786703 | 53   | Sat32CF | na    | na |
| chr1 | 109974224 | 109974279 | 56   | Sat40CF | na    | na |
| chr1 | 110832645 | 110832689 | 45   | Carsat3 | green | na |
| chr1 | 110833640 | 110833931 | 292  | Carsat3 | green | na |
| chr1 | 110834061 | 110834171 | 111  | Carsat3 | green | na |
| chr1 | 113526245 | 113526729 | 485  | Sat12CF | na    | na |
| chr1 | 113545997 | 113546073 | 77   | Sat12CF | na    | na |
| chr1 | 113546300 | 113546458 | 159  | Sat12CF | na    | na |
| chr1 | 113546391 | 113546469 | 79   | Sat12CF | na    | na |
| chr1 | 113546681 | 113546879 | 199  | Sat12CF | na    | na |
| chr1 | 113738757 | 113738965 | 209  | Carsat3 | green | na |
| chr1 | 113739015 | 113740130 | 1116 | Carsat3 | green | na |
| chr1 | 113777747 | 113777960 | 214  | Carsat3 | green | na |
| chr1 | 113778085 | 113778903 | 819  | Carsat3 | green | na |
| chr1 | 113809000 | 113809298 | 299  | Carsat3 | green | na |
| chr1 | 113809419 | 113810007 | 589  | Carsat3 | green | na |
| chr1 | 113871185 | 113872655 | 1471 | Carsat3 | green | na |
| chr1 | 113872686 | 113872915 | 230  | Carsat3 | green | na |
| chr1 | 113925627 | 113926924 | 1298 | Carsat3 | green | na |
| chr1 | 113975036 | 113975757 | 722  | Carsat3 | green | na |
| chr1 | 113975808 | 113975906 | 99   | Carsat3 | green | na |
| chr1 | 113987078 | 113988699 | 1622 | Carsat3 | green | na |
| chr1 | 114023566 | 114025194 | 1629 | Carsat3 | green | na |
| chr1 | 114046572 | 114046866 | 295  | Carsat3 | green | na |
| chr1 | 114046881 | 114048126 | 1246 | Carsat3 | green | na |
| chr1 | 114075345 | 114075952 | 608  | Carsat3 | green | na |
| chr1 | 114076056 | 114076451 | 396  | Carsat3 | green | na |
| chr1 | 114113572 | 114115079 | 1508 | Carsat3 | green | na |
| chr1 | 114176659 | 114177931 | 1273 | Carsat3 | green | na |
| chr1 | 114195488 | 114195671 | 184  | Carsat3 | green | na |
| chr1 | 114195686 | 114195906 | 221  | Carsat3 | green | na |
| chr1 | 114196024 | 114197448 | 1425 | Carsat3 | green | na |
| chr1 | 115828546 | 115828628 | 83   | Sat18CF | na    | na |
| chr1 | 116433804 | 116436461 | 2658 | Carsat3 | green | na |
| chr1 | 116812428 | 116812599 | 172  | Sat5CF  | stalk | na |

|      |           |           |      |         |       |    |
|------|-----------|-----------|------|---------|-------|----|
| chr1 | 117983451 | 117983968 | 518  | Carsat3 | green | na |
| chr1 | 117983984 | 117984666 | 683  | Carsat3 | green | na |
| chr1 | 117998020 | 118000197 | 2178 | Carsat3 | green | na |
| chr1 | 118032880 | 118034248 | 1369 | Carsat3 | green | na |
| chr1 | 118095854 | 118097883 | 2030 | Carsat3 | green | na |
| chr1 | 118158183 | 118159153 | 971  | Carsat3 | green | na |
| chr1 | 118171043 | 118171173 | 131  | Carsat3 | green | na |
| chr1 | 118214845 | 118215511 | 667  | Carsat3 | green | na |
| chr1 | 118215781 | 118216084 | 304  | Carsat3 | green | na |
| chr1 | 118257219 | 118257306 | 88   | Carsat3 | green | na |
| chr1 | 118257387 | 118258504 | 1118 | Carsat3 | green | na |
| chr1 | 118323848 | 118325476 | 1629 | Carsat3 | green | na |
| chr1 | 118403824 | 118404770 | 947  | Carsat3 | green | na |
| chr1 | 118423789 | 118425486 | 1698 | Carsat3 | green | na |
| chr1 | 118498930 | 118499279 | 350  | Carsat3 | green | na |
| chr1 | 118499295 | 118500370 | 1076 | Carsat3 | green | na |
| chr1 | 118534075 | 118534299 | 225  | Carsat3 | green | na |
| chr1 | 118534482 | 118534495 | 14   | Carsat3 | green | na |
| chr1 | 118534754 | 118535263 | 510  | Carsat3 | green | na |
| chr1 | 118535365 | 118535429 | 65   | Carsat3 | green | na |
| chr1 | 118535511 | 118535639 | 129  | Carsat3 | green | na |
| chr1 | 118551998 | 118553323 | 1326 | Carsat3 | green | na |
| chr1 | 118585108 | 118586397 | 1290 | Carsat3 | green | na |
| chr1 | 118629924 | 118631293 | 1370 | Carsat3 | green | na |
| chr1 | 118654760 | 118656173 | 1414 | Carsat3 | green | na |
| chr1 | 118696699 | 118697816 | 1118 | Carsat3 | green | na |
| chr1 | 118763467 | 118764025 | 559  | Carsat3 | green | na |
| chr1 | 118783715 | 118784600 | 886  | Carsat3 | green | na |
| chr1 | 118840666 | 118841956 | 1291 | Carsat3 | green | na |
| chr1 | 118880176 | 118881402 | 1227 | Carsat3 | green | na |
| chr1 | 118905438 | 118905521 | 84   | Carsat3 | green | na |
| chr1 | 118906367 | 118906455 | 89   | Carsat3 | green | na |
| chr1 | 118906584 | 118907702 | 1119 | Carsat3 | green | na |
| chr1 | 118947249 | 118948373 | 1125 | Carsat3 | green | na |
| chr1 | 119003207 | 119004077 | 871  | Carsat3 | green | na |
| chr1 | 119051704 | 119053158 | 1455 | Carsat3 | green | na |
| chr1 | 119099000 | 119099916 | 917  | Carsat3 | green | na |
| chr1 | 119100051 | 119100212 | 162  | Carsat3 | green | na |
| chr1 | 119186058 | 119186183 | 126  | Carsat3 | green | na |
| chr1 | 119186196 | 119187071 | 876  | Carsat3 | green | na |
| chr1 | 119213165 | 119214235 | 1071 | Carsat3 | green | na |
| chr1 | 119290289 | 119291607 | 1319 | Carsat3 | green | na |

|      |           |           |      |           |       |    |
|------|-----------|-----------|------|-----------|-------|----|
| chr1 | 119308949 | 119309884 | 936  | Carsat3   | green | na |
| chr1 | 119309903 | 119310089 | 187  | Carsat3   | green | na |
| chr1 | 119319552 | 119320256 | 705  | Carsat3   | green | na |
| chr1 | 119368295 | 119369496 | 1202 | Carsat3   | green | na |
| chr1 | 119369536 | 119369769 | 234  | Carsat3   | green | na |
| chr1 | 119422069 | 119423174 | 1106 | Carsat3   | green | na |
| chr1 | 119643509 | 119643769 | 261  | Sat21CF   | na    | na |
| chr1 | 120041826 | 120043074 | 1249 | Sat126CF  | na    | na |
| chr1 | 120041960 | 120043722 | 1763 | Sat126CF  | na    | na |
| chr1 | 120042141 | 120043938 | 1798 | Sat126CF  | na    | na |
| chr1 | 120043275 | 120044017 | 743  | Sat126CF  | na    | na |
| chr1 | 120332658 | 120333178 | 521  | CarSat1   | red   | na |
| chr1 | 120494109 | 120495101 | 993  | Carsat3   | green | na |
| chr1 | 120495181 | 120495267 | 87   | Carsat3   | green | na |
| chr1 | 120503623 | 120504799 | 1177 | Carsat3   | green | na |
| chr1 | 120550589 | 120551757 | 1169 | Carsat3   | green | na |
| chr1 | 120632909 | 120633063 | 155  | Carsat3   | green | na |
| chr1 | 120633087 | 120634433 | 1347 | Carsat3   | green | na |
| chr1 | 120680264 | 120680912 | 649  | Carsat3   | green | na |
| chr1 | 120839130 | 120841069 | 1940 | Sat77CF   | na    | na |
| chr1 | 120839341 | 120841435 | 2095 | Sat77CF   | na    | na |
| chr1 | 120839737 | 120841855 | 2119 | Sat77CF   | na    | na |
| chr1 | 120840105 | 120842231 | 2127 | Sat77CF   | na    | na |
| chr1 | 120840476 | 120842574 | 2099 | Sat77CF   | na    | na |
| chr1 | 120840898 | 120842958 | 2061 | Sat77CF   | na    | na |
| chr1 | 120842775 | 120843205 | 431  | Sat77CF   | na    | na |
| chr1 | 120843441 | 120843532 | 92   | Sat77CF   | na    | na |
| chr1 | 121351289 | 121351317 | 29   | Sat5CF    | stalk | na |
| chr1 | 121351300 | 121351317 | 18   | Sat5CF    | stalk | na |
| chr1 | 121920304 | 121920471 | 168  | SUBTEL_sa | na    | na |
| chr1 | 121920512 | 121920838 | 327  | SUBTEL_sa | na    | na |
| chr1 | 121920885 | 121921032 | 148  | SUBTEL_sa | na    | na |
| chr1 | 121981697 | 121981800 | 104  | Sat107CF  | na    | na |
| chr1 | 122337364 | 122337401 | 38   | Sat72CF   | na    | na |
| chr1 | 122337895 | 122337967 | 73   | Sat72CF   | na    | na |
| chr1 | 123352689 | 123352892 | 204  | Sat37CF   | na    | na |
| chr1 | 123875374 | 123875822 | 449  | Sat57CF   | na    | na |
| chr1 | 123875404 | 123875756 | 353  | Sat57CF   | na    | na |
| chr1 | 124008473 | 124009972 | 1500 | Sat14CF   | na    | na |
| chr1 | 124156855 | 124157343 | 489  | Sat147CF  | na    | na |
| chr1 | 124872228 | 124872531 | 304  | Sat53CF   | na    | na |
| chr1 | 124920462 | 124920569 | 108  | Sat18CF   | na    | na |

|       |           |           |               |        |         |
|-------|-----------|-----------|---------------|--------|---------|
| chr1  | 124921880 | 124922469 | 590 Sat34CF   | na     | na      |
| chr1  | 124921959 | 124922469 | 511 Sat34CF   | na     | na      |
| chr1  | 124922041 | 124922519 | 479 Sat34CF   | na     | na      |
| chr1  | 125091305 | 125091480 | 176 Sat52CF   | na     | na      |
| chr1  | 125429159 | 125429464 | 306 Sat106CF  | na     | na      |
| chr1  | 125429208 | 125429458 | 251 Sat57CF   | na     | na      |
| chr10 | 4838249   | 4838338   | 90 Sat62CF    | na     | pericen |
| chr10 | 8466362   | 8466949   | 588 CarSat1   | red    | na      |
| chr10 | 10460678  | 10460774  | 97 SUBTEL_sa  | na     | na      |
| chr10 | 12103412  | 12103452  | 41 Sat76CF    | na     | na      |
| chr10 | 13163894  | 13164009  | 116 Carsat3   | green  | na      |
| chr10 | 13821784  | 13822035  | 252 Sat6CF    | select | na      |
| chr10 | 13821814  | 13822664  | 851 Sat6CF    | select | na      |
| chr10 | 14173241  | 14173313  | 73 Sat86CF    | na     | na      |
| chr10 | 15196626  | 15196739  | 114 Sat21CF   | na     | na      |
| chr10 | 15744650  | 15744768  | 119 Sat27CF   | na     | na      |
| chr10 | 16096201  | 16096656  | 456 Sat18CF   | na     | na      |
| chr10 | 16344157  | 16344245  | 89 Sat136CF   | na     | na      |
| chr10 | 16344169  | 16345308  | 1140 Sat136CF | na     | na      |
| chr10 | 16345188  | 16345322  | 135 Sat136CF  | na     | na      |
| chr10 | 16770319  | 16770363  | 45 Sat60CF    | na     | na      |
| chr10 | 17277015  | 17277215  | 201 Sat178CF  | na     | na      |
| chr10 | 17944026  | 17944247  | 222 Sat17CF   | na     | na      |
| chr10 | 18412858  | 18413660  | 803 Sat163CF  | na     | na      |
| chr10 | 18431449  | 18432042  | 594 Sat28CF   | na     | na      |
| chr10 | 18431528  | 18432075  | 548 Sat28CF   | na     | na      |
| chr10 | 18979638  | 18980334  | 697 Sat79CF   | na     | na      |
| chr10 | 19396023  | 19396393  | 371 Sat7CF    | lime   | na      |
| chr10 | 19721305  | 19722034  | 730 Sat53CF   | na     | na      |
| chr10 | 20489596  | 20489680  | 85 Sat27CF    | na     | na      |
| chr10 | 20489608  | 20490138  | 531 Sat18CF   | na     | na      |
| chr10 | 20489687  | 20495352  | 5666 Sat27CF  | na     | na      |
| chr10 | 20611930  | 20612362  | 433 Sat19CF   | na     | na      |
| chr10 | 20613963  | 20613991  | 29 Sat52CF    | na     | na      |
| chr10 | 20738021  | 20738279  | 259 SUBTEL_sa | na     | na      |
| chr10 | 20738285  | 20738403  | 119 Sat5CF    | stalk  | na      |
| chr10 | 20738296  | 20738426  | 131 Sat5CF    | stalk  | na      |
| chr10 | 20913306  | 20913728  | 423 Sat91CF   | na     | na      |
| chr10 | 20913439  | 20913763  | 325 Sat39CF   | na     | na      |
| chr10 | 21007751  | 21007769  | 19 Sat38CF    | na     | na      |
| chr10 | 21134616  | 21135078  | 463 Sat104CF  | na     | na      |
| chr10 | 21326916  | 21327115  | 200 Sat52CF   | na     | na      |

|       |          |          |              |           |    |
|-------|----------|----------|--------------|-----------|----|
| chr10 | 21327182 | 21327276 | 95 Sat52CF   | na        | na |
| chr10 | 21605904 | 21606114 | 211 Sat50CF  | na        | na |
| chr10 | 21764832 | 21765264 | 433 Sat4CF   | lred      | na |
| chr10 | 21870720 | 21871282 | 563 Sat124CF | na        | na |
| chr10 | 21958637 | 21959612 | 976 Sat97CF  | na        | na |
| chr10 | 22061615 | 22061778 | 164 Sat5CF   | stalk     | na |
| chr10 | 23619507 | 23619776 | 270 Sat28CF  | na        | na |
| chr10 | 23869701 | 23869782 | 82 Sat88CF   | na        | na |
| chr10 | 24003733 | 24003790 | 58 Sat7CF    | lime      | na |
| chr10 | 24215061 | 24215405 | 345 Sat30CF  | na        | na |
| chr10 | 28424682 | 28424860 | 179 Sat95CF  | na        | na |
| chr10 | 28770729 | 28770822 | 94 Sat125CF  | na        | na |
| chr10 | 30500661 | 30500764 | 104 Sat13CF  | na        | na |
| chr10 | 31795115 | 31796167 | 1053 Sat99CF | na        | na |
| chr10 | 37150427 | 37150585 | 159 Carsat2  | orange    | na |
| chr10 | 37150798 | 37151371 | 574 Carsat2  | orange    | na |
| chr10 | 37153666 | 37155454 | 1789 Carsat2 | orange    | na |
| chr10 | 37155489 | 37156478 | 990 Carsat2  | orange    | na |
| chr10 | 37156922 | 37157313 | 392 Carsat2  | orange    | na |
| chr10 | 37157340 | 37159280 | 1941 Carsat2 | orange    | na |
| chr10 | 37161896 | 37162224 | 329 Carsat2  | orange    | na |
| chr10 | 37181202 | 37181691 | 490 SAT1_CF  | blue      | na |
| chr10 | 37195616 | 37197906 | 2291 CarSat1 | red       | na |
| chr10 | 37198082 | 37198909 | 828 CarSat1  | red       | na |
| chr10 | 38313875 | 38313941 | 67 Sat45CF   | na        | na |
| chr10 | 38426662 | 38426692 | 31 Sat58CF   | na        | na |
| chr10 | 38828455 | 38828517 | 63 Sat26CF   | na        | na |
| chr10 | 40040466 | 40040518 | 53 Sat27CF   | na        | na |
| chr10 | 40918746 | 40918852 | 107 Sat95CF  | na        | na |
| chr10 | 42380155 | 42380282 | 128 Sat27CF  | na        | na |
| chr10 | 42957621 | 42957693 | 73 Sat154CF  | na        | na |
| chr10 | 43412297 | 43412344 | 48 Sat95CF   | na        | na |
| chr10 | 43737403 | 43737473 | 71 Sat98CF   | na        | na |
| chr10 | 45015113 | 45015386 | 274 Sat19CF  | na        | na |
| chr10 | 45015184 | 45015411 | 228 Sat19CF  | na        | na |
| chr10 | 45630565 | 45630614 | 50 Sat164CF  | na        | na |
| chr10 | 47379462 | 47379514 | 53 Sat98CF   | na        | na |
| chr10 | 48852810 | 48852859 | 50 Sat12CF   | na        | na |
| chr10 | 48852829 | 48852900 | 72 Sat12CF   | na        | na |
| chr10 | 49776716 | 49776793 | 78 Sat83CF   | na        | na |
| chr10 | 51630151 | 51630209 | 59 Sat95CF   | na        | na |
| chr10 | 57014876 | 57015388 | 513 Sat3CF   | optpurple | na |



|       |          |          |              |           |         |
|-------|----------|----------|--------------|-----------|---------|
| chr10 | 57014965 | 57015388 | 424 Sat3CF   | optpurple | na      |
| chr10 | 57314841 | 57314882 | 42 Sat36CF   | na        | na      |
| chr10 | 58967197 | 58967286 | 90 Sat153CF  | na        | na      |
| chr10 | 59281460 | 59281548 | 89 Sat17CF   | na        | na      |
| chr10 | 59282433 | 59282520 | 88 Sat17CF   | na        | na      |
| chr10 | 63745703 | 63745780 | 78 Carsat3   | green     | na      |
| chr10 | 67538181 | 67538571 | 391 Sat97CF  | na        | na      |
| chr10 | 67658713 | 67659291 | 579 Sat19CF  | na        | na      |
| chr10 | 68062999 | 68063073 | 75 Sat173CF  | na        | na      |
| chr10 | 70331386 | 70331494 | 109 Sat24CF  | na        | na      |
| chr10 | 70456777 | 70457116 | 340 Sat81CF  | na        | na      |
| chr10 | 71212045 | 71212189 | 145 Sat50CF  | na        | na      |
| chr10 | 71493837 | 71494401 | 565 Sat74CF  | na        | na      |
| chr10 | 71731869 | 71732114 | 246 Sat79CF  | na        | na      |
| chr10 | 71731915 | 71732143 | 229 Sat57CF  | na        | na      |
| chr10 | 71872754 | 71873818 | 1065 Sat6CF  | select    | na      |
| chr10 | 72015728 | 72016116 | 389 Sat52CF  | na        | na      |
| chr10 | 72417808 | 72417858 | 51 Sat12CF   | na        | na      |
| chr10 | 72473586 | 72473750 | 165 Carsat2  | orange    | na      |
| chr10 | 72476204 | 72476285 | 82 Sat2CF    | purple    | na      |
| chr10 | 72476220 | 72476287 | 68 Sat2CF    | purple    | na      |
| chr11 | 3000259  | 3000664  | 406 CarSat1  | red       | pericen |
| chr11 | 3000845  | 3001233  | 389 CarSat1  | red       | pericen |
| chr11 | 3001254  | 3002275  | 1022 CarSat1 | red       | pericen |
| chr11 | 3002289  | 3002835  | 547 CarSat1  | red       | pericen |
| chr11 | 3003159  | 3003800  | 642 CarSat1  | red       | pericen |
| chr11 | 3003846  | 3004612  | 767 CarSat1  | red       | pericen |
| chr11 | 3004771  | 3005192  | 422 CarSat1  | red       | pericen |
| chr11 | 3013115  | 3013705  | 591 CarSat1  | red       | pericen |
| chr11 | 3013892  | 3013991  | 100 CarSat1  | red       | pericen |
| chr11 | 3014009  | 3015429  | 1421 CarSat1 | red       | pericen |
| chr11 | 3021038  | 3021200  | 163 Sat2CF   | purple    | pericen |
| chr11 | 3021065  | 3022121  | 1057 Sat2CF  | purple    | pericen |
| chr11 | 3022348  | 3023756  | 1409 SAT1_CF | blue      | pericen |
| chr11 | 3023785  | 3024929  | 1145 CarSat1 | red       | pericen |
| chr11 | 3024950  | 3025687  | 738 CarSat1  | red       | pericen |
| chr11 | 3056872  | 3057038  | 167 Sat2CF   | purple    | pericen |
| chr11 | 3057294  | 3057782  | 489 Sat2CF   | purple    | pericen |
| chr11 | 3057784  | 3059187  | 1404 CarSat1 | red       | pericen |
| chr11 | 3059355  | 3059967  | 613 CarSat1  | red       | pericen |
| chr11 | 3060000  | 3060417  | 418 CarSat1  | red       | pericen |
| chr11 | 3061009  | 3062720  | 1712 Carsat2 | orange    | pericen |

|       |          |          |      |           |        |         |
|-------|----------|----------|------|-----------|--------|---------|
| chr11 | 3062735  | 3063824  | 1090 | Carsat2   | orange | pericen |
| chr11 | 3063835  | 3064953  | 1119 | Carsat2   | orange | pericen |
| chr11 | 3064965  | 3067687  | 2723 | Carsat2   | orange | pericen |
| chr11 | 3067799  | 3068346  | 548  | Carsat2   | orange | pericen |
| chr11 | 3068938  | 3069194  | 257  | Carsat2   | orange | pericen |
| chr11 | 3081770  | 3082518  | 749  | Carsat2   | orange | pericen |
| chr11 | 3082561  | 3083887  | 1327 | Carsat2   | orange | pericen |
| chr11 | 3083925  | 3085026  | 1102 | Carsat2   | orange | pericen |
| chr11 | 3176796  | 3179007  | 2212 | Carsat3   | green  | pericen |
| chr11 | 4837346  | 4837431  | 86   | SUBTEL_sa | na     | pericen |
| chr11 | 5273788  | 5273878  | 91   | Sat89CF   | na     | na      |
| chr11 | 5282966  | 5283211  | 246  | CarSat1   | red    | na      |
| chr11 | 5522751  | 5523861  | 1111 | Carsat3   | green  | na      |
| chr11 | 5546129  | 5547369  | 1241 | Carsat3   | green  | na      |
| chr11 | 5602210  | 5602725  | 516  | Carsat3   | green  | na      |
| chr11 | 5602814  | 5602943  | 130  | Carsat3   | green  | na      |
| chr11 | 5603120  | 5603295  | 176  | Carsat3   | green  | na      |
| chr11 | 5610151  | 5611252  | 1102 | Carsat3   | green  | na      |
| chr11 | 5637177  | 5638273  | 1097 | Carsat3   | green  | na      |
| chr11 | 5684442  | 5685666  | 1225 | Carsat3   | green  | na      |
| chr11 | 5919716  | 5919869  | 154  | Carsat3   | green  | na      |
| chr11 | 5919884  | 5921197  | 1314 | Carsat3   | green  | na      |
| chr11 | 9097016  | 9098050  | 1035 | Sat174CF  | na     | na      |
| chr11 | 9097957  | 9098062  | 106  | Sat174CF  | na     | na      |
| chr11 | 9799559  | 9799611  | 53   | Sat7CF    | lime   | na      |
| chr11 | 10764671 | 10764699 | 29   | Sat156CF  | na     | na      |
| chr11 | 17021209 | 17022290 | 1082 | Sat148CF  | na     | na      |
| chr11 | 17255787 | 17256042 | 256  | Sat17CF   | na     | na      |
| chr11 | 25374550 | 25374666 | 117  | SAT1_CF   | blue   | na      |
| chr11 | 28750097 | 28750137 | 41   | Sat24CF   | na     | na      |
| chr11 | 29816096 | 29816590 | 495  | Carsat2   | orange | na      |
| chr11 | 29816955 | 29817353 | 399  | Carsat2   | orange | na      |
| chr11 | 29838113 | 29839239 | 1127 | Carsat2   | orange | na      |
| chr11 | 29839264 | 29839575 | 312  | Carsat2   | orange | na      |
| chr11 | 29839770 | 29840032 | 263  | Carsat2   | orange | na      |
| chr11 | 29840044 | 29841502 | 1459 | Carsat2   | orange | na      |
| chr11 | 29841797 | 29842402 | 606  | Carsat2   | orange | na      |
| chr11 | 29842434 | 29845639 | 3206 | Carsat2   | orange | na      |
| chr11 | 29845796 | 29846667 | 872  | Carsat2   | orange | na      |
| chr11 | 29846878 | 29847337 | 460  | Carsat2   | orange | na      |
| chr11 | 29847528 | 29847687 | 160  | Carsat2   | orange | na      |
| chr11 | 29847999 | 29848144 | 146  | Carsat2   | orange | na      |

|       |          |          |      |           |        |    |
|-------|----------|----------|------|-----------|--------|----|
| chr11 | 29848349 | 29848637 | 289  | Carsat2   | orange | na |
| chr11 | 29848839 | 29848903 | 65   | Carsat2   | orange | na |
| chr11 | 29851482 | 29852138 | 657  | Carsat2   | orange | na |
| chr11 | 29852362 | 29854617 | 2256 | Carsat2   | orange | na |
| chr11 | 29854802 | 29855692 | 891  | Carsat2   | orange | na |
| chr11 | 29855992 | 29856647 | 656  | Carsat2   | orange | na |
| chr11 | 29856798 | 29857206 | 409  | Carsat2   | orange | na |
| chr11 | 29857826 | 29858268 | 443  | Carsat2   | orange | na |
| chr11 | 29859174 | 29860049 | 876  | Carsat2   | orange | na |
| chr11 | 29860128 | 29860459 | 332  | Carsat2   | orange | na |
| chr11 | 29864056 | 29866130 | 2075 | Carsat2   | orange | na |
| chr11 | 29866235 | 29868295 | 2061 | Carsat2   | orange | na |
| chr11 | 29868492 | 29869583 | 1092 | Carsat2   | orange | na |
| chr11 | 29869812 | 29871540 | 1729 | Carsat2   | orange | na |
| chr11 | 29871567 | 29872679 | 1113 | Carsat2   | orange | na |
| chr11 | 29872698 | 29873705 | 1008 | Carsat2   | orange | na |
| chr11 | 33707410 | 33707463 | 54   | Sat45CF   | na     | na |
| chr11 | 34037161 | 34037270 | 110  | Carsat3   | green  | na |
| chr11 | 34286400 | 34286526 | 127  | Carsat3   | green  | na |
| chr11 | 36850653 | 36850729 | 77   | Sat154CF  | na     | na |
| chr11 | 39488633 | 39488689 | 57   | Sat88CF   | na     | na |
| chr11 | 40327916 | 40328190 | 275  | Sat2CF    | purple | na |
| chr11 | 41981950 | 41982017 | 68   | Sat67CF   | na     | na |
| chr11 | 43577888 | 43578326 | 439  | Sat75CF   | na     | na |
| chr11 | 43577904 | 43578091 | 188  | Sat75CF   | na     | na |
| chr11 | 43577941 | 43579386 | 1446 | Sat75CF   | na     | na |
| chr11 | 43578179 | 43579522 | 1344 | Sat75CF   | na     | na |
| chr11 | 43725458 | 43726044 | 587  | Sat75CF   | na     | na |
| chr11 | 43726203 | 43726458 | 256  | Sat75CF   | na     | na |
| chr11 | 43976944 | 43976995 | 52   | Sat33CF   | na     | na |
| chr11 | 47148638 | 47149649 | 1012 | Sat185CF  | na     | na |
| chr11 | 48031402 | 48031478 | 77   | Sat27CF   | na     | na |
| chr11 | 49136157 | 49136221 | 65   | Sat107CF  | na     | na |
| chr11 | 50678043 | 50678088 | 46   | Sat89CF   | na     | na |
| chr11 | 55234857 | 55234916 | 60   | Sat19CF   | na     | na |
| chr11 | 55415393 | 55415674 | 282  | Sat86CF   | na     | na |
| chr11 | 55415578 | 55415703 | 126  | Sat86CF   | na     | na |
| chr11 | 61168411 | 61169812 | 1402 | Carsat3   | green  | na |
| chr11 | 63939363 | 63939425 | 63   | Sat116CF  | na     | na |
| chr11 | 64503727 | 64503793 | 67   | SUBTEL_sa | na     | na |
| chr11 | 66603051 | 66603366 | 316  | Carsat2   | orange | na |
| chr11 | 66937441 | 66937485 | 45   | Sat155CF  | na     | na |

|       |          |          |      |          |        |         |
|-------|----------|----------|------|----------|--------|---------|
| chr11 | 69205315 | 69205454 | 140  | Carsat3  | green  | na      |
| chr11 | 69205545 | 69206586 | 1042 | Carsat3  | green  | na      |
| chr11 | 70426276 | 70427364 | 1089 | Carsat3  | green  | na      |
| chr11 | 70445975 | 70447089 | 1115 | Carsat3  | green  | na      |
| chr11 | 70472429 | 70473558 | 1130 | Carsat3  | green  | na      |
| chr11 | 70552255 | 70552399 | 145  | Sat98CF  | na     | na      |
| chr11 | 75815793 | 75815975 | 183  | Sat52CF  | na     | na      |
| chr11 | 76954939 | 76956270 | 1332 | Sat81CF  | na     | na      |
| chr11 | 76955980 | 76956306 | 327  | Sat81CF  | na     | na      |
| chr11 | 76963548 | 76963739 | 192  | Sat69CF  | na     | na      |
| chr12 | 3011881  | 3012190  | 310  | Sat2CF   | purple | pericen |
| chr12 | 3012537  | 3012887  | 351  | Sat2CF   | purple | pericen |
| chr12 | 3012541  | 3012850  | 310  | Sat2CF   | purple | pericen |
| chr12 | 3017337  | 3017835  | 499  | SAT1_CF  | blue   | pericen |
| chr12 | 3020063  | 3021082  | 1020 | CarSat1  | red    | pericen |
| chr12 | 3021114  | 3022050  | 937  | CarSat1  | red    | pericen |
| chr12 | 3285634  | 3286151  | 518  | Carsat2  | orange | pericen |
| chr12 | 4191218  | 4191275  | 58   | Sat30CF  | na     | pericen |
| chr12 | 4648661  | 4648881  | 221  | Sat7CF   | lime   | pericen |
| chr12 | 5094937  | 5094983  | 47   | Sat165CF | na     | na      |
| chr12 | 5713057  | 5713139  | 83   | Sat179CF | na     | na      |
| chr12 | 5914290  | 5914384  | 95   | Carsat3  | green  | na      |
| chr12 | 6856555  | 6856674  | 120  | Sat5CF   | stalk  | na      |
| chr12 | 8116195  | 8116239  | 45   | Sat10CF  | na     | na      |
| chr12 | 8886180  | 8886297  | 118  | Sat12CF  | na     | na      |
| chr12 | 8886204  | 8886345  | 142  | Sat12CF  | na     | na      |
| chr12 | 8908056  | 8908122  | 67   | Sat18CF  | na     | na      |
| chr12 | 9567893  | 9567967  | 75   | Sat12CF  | na     | na      |
| chr12 | 9740747  | 9740845  | 99   | Sat12CF  | na     | na      |
| chr12 | 9740758  | 9740868  | 111  | Sat12CF  | na     | na      |
| chr12 | 9741005  | 9741130  | 126  | Sat12CF  | na     | na      |
| chr12 | 9741023  | 9741160  | 138  | Sat12CF  | na     | na      |
| chr12 | 10172826 | 10172887 | 62   | Sat35CF  | na     | na      |
| chr12 | 11100525 | 11100697 | 173  | Sat12CF  | na     | na      |
| chr12 | 11979641 | 11979693 | 53   | Sat76CF  | na     | na      |
| chr12 | 12050064 | 12050357 | 294  | Sat12CF  | na     | na      |
| chr12 | 12109700 | 12109794 | 95   | Sat12CF  | na     | na      |
| chr12 | 12265303 | 12265402 | 100  | Sat12CF  | na     | na      |
| chr12 | 12265460 | 12265680 | 221  | Sat12CF  | na     | na      |
| chr12 | 12265736 | 12265879 | 144  | Sat12CF  | na     | na      |
| chr12 | 12266243 | 12266441 | 199  | Sat12CF  | na     | na      |
| chr12 | 12468917 | 12469021 | 105  | Sat50CF  | na     | na      |

|       |          |          |               |       |    |
|-------|----------|----------|---------------|-------|----|
| chr12 | 12477056 | 12477264 | 209 Sat12CF   | na    | na |
| chr12 | 12534237 | 12534476 | 240 Sat12CF   | na    | na |
| chr12 | 12960525 | 12960712 | 188 Sat12CF   | na    | na |
| chr12 | 12960528 | 12960825 | 298 Sat12CF   | na    | na |
| chr12 | 13249122 | 13249163 | 42 Sat86CF    | na    | na |
| chr12 | 13639338 | 13639417 | 80 Sat38CF    | na    | na |
| chr12 | 14312328 | 14312528 | 201 Sat12CF   | na    | na |
| chr12 | 14312587 | 14312707 | 121 Sat12CF   | na    | na |
| chr12 | 14313461 | 14313623 | 163 Sat12CF   | na    | na |
| chr12 | 15163503 | 15163597 | 95 Sat63CF    | na    | na |
| chr12 | 15239596 | 15239687 | 92 Sat12CF    | na    | na |
| chr12 | 15265323 | 15265422 | 100 Sat12CF   | na    | na |
| chr12 | 15265326 | 15265440 | 115 Sat12CF   | na    | na |
| chr12 | 15373513 | 15373640 | 128 Sat12CF   | na    | na |
| chr12 | 15424128 | 15424305 | 178 Sat12CF   | na    | na |
| chr12 | 15424138 | 15424282 | 145 Sat12CF   | na    | na |
| chr12 | 15474999 | 15475193 | 195 Sat12CF   | na    | na |
| chr12 | 15475035 | 15475194 | 160 Sat12CF   | na    | na |
| chr12 | 15475389 | 15475501 | 113 Sat12CF   | na    | na |
| chr12 | 15493736 | 15493916 | 181 Sat12CF   | na    | na |
| chr12 | 15493738 | 15493986 | 249 Sat12CF   | na    | na |
| chr12 | 15494991 | 15495195 | 205 Sat12CF   | na    | na |
| chr12 | 15495002 | 15495225 | 224 Sat12CF   | na    | na |
| chr12 | 16057802 | 16057875 | 74 Sat27CF    | na    | na |
| chr12 | 20534833 | 20535037 | 205 Sat21CF   | na    | na |
| chr12 | 21567779 | 21567848 | 70 Sat57CF    | na    | na |
| chr12 | 23210809 | 23210894 | 86 Sat107CF   | na    | na |
| chr12 | 23931205 | 23931244 | 40 Sat36CF    | na    | na |
| chr12 | 27072415 | 27072528 | 114 SUBTEL_sa | na    | na |
| chr12 | 30738598 | 30738678 | 81 Sat78CF    | na    | na |
| chr12 | 46185531 | 46185619 | 89 Sat88CF    | na    | na |
| chr12 | 46541069 | 46541126 | 58 Sat45CF    | na    | na |
| chr12 | 61561186 | 61561261 | 76 Sat18CF    | na    | na |
| chr12 | 68268120 | 68268438 | 319 Sat38CF   | na    | na |
| chr12 | 68325437 | 68325824 | 388 Sat24CF   | na    | na |
| chr12 | 69413527 | 69413627 | 101 Carsat3   | green | na |
| chr12 | 71658036 | 71658207 | 172 Sat86CF   | na    | na |
| chr12 | 73048818 | 73049016 | 199 Sat182CF  | na    | na |
| chr12 | 73048819 | 73049046 | 228 Sat182CF  | na    | na |
| chr12 | 73060424 | 73061059 | 636 Sat38CF   | na    | na |
| chr12 | 73472399 | 73473547 | 1149 Sat124CF | na    | na |
| chr12 | 73687256 | 73687720 | 465 Sat87CF   | na    | na |

|       |          |          |              |        |         |
|-------|----------|----------|--------------|--------|---------|
| chr12 | 74490364 | 74490426 | 63 Sat14CF   | na     | na      |
| chr12 | 74501888 | 74502015 | 128 Sat16CF  | na     | na      |
| chr12 | 74616607 | 74616978 | 372 Sat44CF  | na     | na      |
| chr12 | 75078509 | 75078844 | 336 Sat64CF  | na     | na      |
| chr12 | 75078573 | 75080590 | 2018 Sat64CF | na     | na      |
| chr12 | 75080542 | 75080602 | 61 Sat64CF   | na     | na      |
| chr12 | 75263979 | 75264142 | 164 Sat28CF  | na     | na      |
| chr12 | 75414071 | 75414426 | 356 Sat43CF  | na     | na      |
| chr12 | 75515042 | 75515260 | 219 Sat2CF   | purple | na      |
| chr13 | 3004284  | 3005170  | 887 Sat2CF   | purple | pericen |
| chr13 | 3004839  | 3005207  | 369 Sat2CF   | purple | pericen |
| chr13 | 3015092  | 3016101  | 1010 SAT1_CF | blue   | pericen |
| chr13 | 3016120  | 3016665  | 546 SAT1_CF  | blue   | pericen |
| chr13 | 3016699  | 3019171  | 2473 SAT1_CF | blue   | pericen |
| chr13 | 3019189  | 3020021  | 833 CarSat1  | red    | pericen |
| chr13 | 3027679  | 3030138  | 2460 CarSat1 | red    | pericen |
| chr13 | 3030151  | 3030338  | 188 CarSat1  | red    | pericen |
| chr13 | 3030527  | 3030983  | 457 CarSat1  | red    | pericen |
| chr13 | 4074234  | 4074280  | 47 CarSat1   | red    | pericen |
| chr13 | 8733409  | 8733609  | 201 SAT1_CF  | blue   | na      |
| chr13 | 17119036 | 17119917 | 882 Sat7CF   | lime   | na      |
| chr13 | 18230229 | 18230306 | 78 Sat27CF   | na     | na      |
| chr13 | 19827874 | 19828111 | 238 CarSat1  | red    | na      |
| chr13 | 23942011 | 23942157 | 147 Carsat3  | green  | na      |
| chr13 | 23942261 | 23942563 | 303 Carsat3  | green  | na      |
| chr13 | 24581498 | 24581768 | 271 Carsat3  | green  | na      |
| chr13 | 24581944 | 24582036 | 93 Carsat3   | green  | na      |
| chr13 | 26019581 | 26020484 | 904 Carsat3  | green  | na      |
| chr13 | 26020513 | 26020693 | 181 Carsat3  | green  | na      |
| chr13 | 32103319 | 32103378 | 60 Sat165CF  | na     | na      |
| chr13 | 32103326 | 32103378 | 53 Sat165CF  | na     | na      |
| chr13 | 32620227 | 32620281 | 55 Sat66CF   | na     | na      |
| chr13 | 33487150 | 33487366 | 217 Sat4CF   | lred   | na      |
| chr13 | 35039228 | 35039286 | 59 Sat177CF  | na     | na      |
| chr13 | 36558518 | 36558560 | 43 Sat15CF   | na     | na      |
| chr13 | 37527726 | 37527794 | 69 Sat5CF    | stalk  | na      |
| chr13 | 37561181 | 37561404 | 224 Sat99CF  | na     | na      |
| chr13 | 37561221 | 37561404 | 184 Sat99CF  | na     | na      |
| chr13 | 38521030 | 38521152 | 123 Carsat3  | green  | na      |
| chr13 | 38836141 | 38836322 | 182 Sat57CF  | na     | na      |
| chr13 | 38836214 | 38836358 | 145 Sat57CF  | na     | na      |
| chr13 | 38859032 | 38859181 | 150 Sat52CF  | na     | na      |

|       |          |          |               |       |    |
|-------|----------|----------|---------------|-------|----|
| chr13 | 38886335 | 38886643 | 309 Sat153CF  | na    | na |
| chr13 | 38886514 | 38886668 | 155 Sat153CF  | na    | na |
| chr13 | 39081745 | 39082054 | 310 Sat30CF   | na    | na |
| chr13 | 39081855 | 39082054 | 200 Sat30CF   | na    | na |
| chr13 | 39081865 | 39082095 | 231 Sat30CF   | na    | na |
| chr13 | 39679102 | 39679279 | 178 Sat38CF   | na    | na |
| chr13 | 39679151 | 39679279 | 129 Sat38CF   | na    | na |
| chr13 | 40044455 | 40044702 | 248 Carsat3   | green | na |
| chr13 | 40060578 | 40060968 | 391 Carsat3   | green | na |
| chr13 | 40079345 | 40079844 | 500 Carsat3   | green | na |
| chr13 | 40318673 | 40319828 | 1156 Carsat3  | green | na |
| chr13 | 41048147 | 41048289 | 143 Sat72CF   | na    | na |
| chr13 | 41076529 | 41076859 | 331 Carsat3   | green | na |
| chr13 | 41076873 | 41077314 | 442 Carsat3   | green | na |
| chr13 | 41096821 | 41097733 | 913 Carsat3   | green | na |
| chr13 | 41097763 | 41098194 | 432 Carsat3   | green | na |
| chr13 | 41119471 | 41119657 | 187 Carsat3   | green | na |
| chr13 | 41120029 | 41120241 | 213 Carsat3   | green | na |
| chr13 | 41147622 | 41148564 | 943 Carsat3   | green | na |
| chr13 | 41161207 | 41161370 | 164 Carsat3   | green | na |
| chr13 | 41161544 | 41161790 | 247 Carsat3   | green | na |
| chr13 | 41161964 | 41162279 | 316 Carsat3   | green | na |
| chr13 | 41193174 | 41194591 | 1418 Carsat3  | green | na |
| chr13 | 41226049 | 41227573 | 1525 Carsat3  | green | na |
| chr13 | 41227630 | 41227921 | 292 Carsat3   | green | na |
| chr13 | 41862795 | 41863139 | 345 Sat18CF   | na    | na |
| chr13 | 41911320 | 41911462 | 143 SUBTEL_sa | na    | na |
| chr13 | 42352824 | 42352906 | 83 SUBTEL_sa  | na    | na |
| chr13 | 42602537 | 42602612 | 76 Sat93CF    | na    | na |
| chr13 | 42602706 | 42602752 | 47 Sat93CF    | na    | na |
| chr13 | 43056775 | 43056943 | 169 Sat93CF   | na    | na |
| chr13 | 43056798 | 43056943 | 146 Sat93CF   | na    | na |
| chr13 | 46672473 | 46672514 | 42 Sat36CF    | na    | na |
| chr13 | 46905448 | 46906081 | 634 Sat16CF   | na    | na |
| chr13 | 50587200 | 50587242 | 43 Sat10CF    | na    | na |
| chr13 | 50811321 | 50811436 | 116 Carsat3   | green | na |
| chr13 | 50811449 | 50811664 | 216 Carsat3   | green | na |
| chr13 | 50812480 | 50812628 | 149 Carsat3   | green | na |
| chr13 | 50812659 | 50812874 | 216 Carsat3   | green | na |
| chr13 | 53853132 | 53853180 | 49 Sat5CF     | stalk | na |
| chr13 | 62159329 | 62159581 | 253 Sat17CF   | na    | na |
| chr13 | 62902929 | 62902999 | 71 Sat78CF    | na    | na |

|       |          |          |              |        |         |
|-------|----------|----------|--------------|--------|---------|
| chr13 | 65090231 | 65090289 | 59 Sat81CF   | na     | na      |
| chr13 | 66071633 | 66071908 | 276 Carsat2  | orange | na      |
| chr13 | 66147457 | 66147741 | 285 Carsat2  | orange | na      |
| chr13 | 66154177 | 66157164 | 2988 Carsat2 | orange | na      |
| chr13 | 66158884 | 66160057 | 1174 Carsat2 | orange | na      |
| chr13 | 66160090 | 66161163 | 1074 Carsat2 | orange | na      |
| chr13 | 66161199 | 66162962 | 1764 Carsat2 | orange | na      |
| chr13 | 66162993 | 66164326 | 1334 Carsat2 | orange | na      |
| chr13 | 66169359 | 66169920 | 562 Carsat2  | orange | na      |
| chr13 | 66170145 | 66171819 | 1675 Carsat2 | orange | na      |
| chr14 | 3299081  | 3300623  | 1543 CarSat1 | red    | pericen |
| chr14 | 3317694  | 3318009  | 316 SAT1_Cf  | blue   | pericen |
| chr14 | 3894407  | 3894432  | 26 Sat52CF   | na     | pericen |
| chr14 | 4076949  | 4077198  | 250 Carsat2  | orange | pericen |
| chr14 | 4112314  | 4112925  | 612 Carsat2  | orange | pericen |
| chr14 | 4127934  | 4129078  | 1145 Carsat2 | orange | pericen |
| chr14 | 4129250  | 4129864  | 615 Carsat2  | orange | pericen |
| chr14 | 4504529  | 4504672  | 144 Sat2CF   | purple | pericen |
| chr14 | 5225161  | 5225986  | 826 CarSat1  | red    | na      |
| chr14 | 10978894 | 10978961 | 68 Sat9CF    | na     | na      |
| chr14 | 14975885 | 14977754 | 1870 Carsat2 | orange | na      |
| chr14 | 14977767 | 14979241 | 1475 Carsat2 | orange | na      |
| chr14 | 14979282 | 14980153 | 872 Carsat2  | orange | na      |
| chr14 | 15102161 | 15102258 | 98 Sat7CF    | lime   | na      |
| chr14 | 15102771 | 15103890 | 1120 Carsat3 | green  | na      |
| chr14 | 15354672 | 15354724 | 53 Sat65CF   | na     | na      |
| chr14 | 21335038 | 21335068 | 31 Sat16CF   | na     | na      |
| chr14 | 23365883 | 23365974 | 92 Carsat3   | green  | na      |
| chr14 | 25267318 | 25268098 | 781 Sat10CF  | na     | na      |
| chr14 | 25267508 | 25268265 | 758 Sat10CF  | na     | na      |
| chr14 | 25267783 | 25268899 | 1117 Sat10CF | na     | na      |
| chr14 | 25267799 | 25268141 | 343 Sat10CF  | na     | na      |
| chr14 | 25267907 | 25269126 | 1220 Sat10CF | na     | na      |
| chr14 | 25268591 | 25269761 | 1171 Sat10CF | na     | na      |
| chr14 | 25268832 | 25269876 | 1045 Sat10CF | na     | na      |
| chr14 | 25269128 | 25270319 | 1192 Sat10CF | na     | na      |
| chr14 | 25269981 | 25270695 | 715 Sat10CF  | na     | na      |
| chr14 | 25272440 | 25272502 | 63 Sat10CF   | na     | na      |
| chr14 | 35403252 | 35403294 | 43 Sat27CF   | na     | na      |
| chr14 | 37167383 | 37167418 | 36 Sat23CF   | na     | na      |
| chr14 | 38767320 | 38767533 | 214 Sat17CF  | na     | na      |
| chr14 | 39299267 | 39299545 | 279 Carsat2  | orange | na      |



|       |          |          |               |           |         |
|-------|----------|----------|---------------|-----------|---------|
| chr14 | 40578247 | 40578328 | 82 Sat27CF    | na        | na      |
| chr14 | 40900865 | 40904124 | 3260 Sat7CF   | lime      | na      |
| chr14 | 40903358 | 40904236 | 879 Sat7CF    | lime      | na      |
| chr14 | 43269123 | 43269196 | 74 SUBTEL_sa  | na        | na      |
| chr14 | 45573499 | 45573542 | 44 Sat104CF   | na        | na      |
| chr14 | 49534481 | 49534544 | 64 Sat63CF    | na        | na      |
| chr14 | 50015556 | 50015654 | 99 Carsat3    | green     | na      |
| chr14 | 50164890 | 50164988 | 99 Sat72CF    | na        | na      |
| chr14 | 51233291 | 51233529 | 239 Sat18CF   | na        | na      |
| chr14 | 52572816 | 52572887 | 72 Sat17CF    | na        | na      |
| chr14 | 52831830 | 52831923 | 94 Carsat3    | green     | na      |
| chr14 | 52832457 | 52832597 | 141 Carsat3   | green     | na      |
| chr14 | 54947531 | 54947682 | 152 Sat175CF  | na        | na      |
| chr14 | 54947554 | 54948660 | 1107 Sat175CF | na        | na      |
| chr14 | 54948529 | 54948681 | 153 Sat175CF  | na        | na      |
| chr14 | 59874306 | 59875091 | 786 Sat119CF  | na        | na      |
| chr14 | 61890010 | 61890261 | 252 Sat87CF   | na        | na      |
| chr14 | 61890015 | 61890388 | 374 Sat13CF   | na        | na      |
| chr14 | 61936230 | 61937393 | 1164 Sat167CF | na        | na      |
| chr14 | 62813741 | 62814535 | 795 Sat47CF   | na        | na      |
| chr14 | 62868764 | 62869481 | 718 Sat177CF  | na        | na      |
| chr14 | 62868845 | 62869847 | 1003 Sat177CF | na        | na      |
| chr14 | 62909796 | 62910011 | 216 Sat153CF  | na        | na      |
| chr14 | 63038368 | 63038599 | 232 Sat111CF  | na        | na      |
| chr15 | 3013850  | 3014222  | 373 Sat2CF    | purple    | pericen |
| chr15 | 3157667  | 3158384  | 718 Sat7CF    | lime      | pericen |
| chr15 | 3519801  | 3519981  | 181 Carsat3   | green     | pericen |
| chr15 | 3520155  | 3520398  | 244 Carsat3   | green     | pericen |
| chr15 | 4304150  | 4304213  | 64 Sat21CF    | na        | pericen |
| chr15 | 4703456  | 4703737  | 282 Sat3CF    | optpurple | pericen |
| chr15 | 5428139  | 5428252  | 114 Carsat3   | green     | na      |
| chr15 | 5443377  | 5443509  | 133 Carsat3   | green     | na      |
| chr15 | 5443557  | 5443900  | 344 Carsat3   | green     | na      |
| chr15 | 5460542  | 5461344  | 803 Carsat3   | green     | na      |
| chr15 | 5481261  | 5482052  | 792 Carsat3   | green     | na      |
| chr15 | 5497476  | 5497613  | 138 Carsat3   | green     | na      |
| chr15 | 5516317  | 5516495  | 179 Carsat3   | green     | na      |
| chr15 | 5516510  | 5517085  | 576 Carsat3   | green     | na      |
| chr15 | 5540282  | 5541058  | 777 Carsat3   | green     | na      |
| chr15 | 5843784  | 5843847  | 64 Sat15CF    | na        | na      |
| chr15 | 8428774  | 8428858  | 85 Sat41CF    | na        | na      |
| chr15 | 8432900  | 8433719  | 820 Sat42CF   | na        | na      |

|       |          |          |              |        |    |
|-------|----------|----------|--------------|--------|----|
| chr15 | 8746160  | 8746235  | 76 Sat12CF   | na     | na |
| chr15 | 8768916  | 8769328  | 413 Sat18CF  | na     | na |
| chr15 | 8768965  | 8769328  | 364 Sat18CF  | na     | na |
| chr15 | 9111522  | 9111733  | 212 Sat171CF | na     | na |
| chr15 | 9458634  | 9458703  | 70 Sat12CF   | na     | na |
| chr15 | 9618697  | 9619096  | 400 Carsat3  | green  | na |
| chr15 | 9619276  | 9619844  | 569 Carsat3  | green  | na |
| chr15 | 9656681  | 9656836  | 156 Sat17CF  | na     | na |
| chr15 | 10208886 | 10209278 | 393 Sat4CF   | lred   | na |
| chr15 | 10209831 | 10210003 | 173 Sat4CF   | lred   | na |
| chr15 | 10733410 | 10734033 | 624 Sat86CF  | na     | na |
| chr15 | 10810543 | 10810788 | 246 Sat120CF | na     | na |
| chr15 | 10837776 | 10838265 | 490 Sat176CF | na     | na |
| chr15 | 11029946 | 11030364 | 419 Sat47CF  | na     | na |
| chr15 | 11551804 | 11552135 | 332 Sat2CF   | purple | na |
| chr15 | 11551926 | 11552122 | 197 Sat2CF   | purple | na |
| chr15 | 11555987 | 11556073 | 87 SAT1_CF   | blue   | na |
| chr15 | 11577028 | 11577344 | 317 Carsat2  | orange | na |
| chr15 | 11583177 | 11584028 | 852 CarSat1  | red    | na |
| chr15 | 11592289 | 11592422 | 134 CarSat1  | red    | na |
| chr15 | 11603798 | 11604195 | 398 Carsat2  | orange | na |
| chr15 | 11614634 | 11614767 | 134 CarSat1  | red    | na |
| chr15 | 14830389 | 14830434 | 46 Carsat2   | orange | na |
| chr15 | 14935970 | 14936033 | 64 Sat65CF   | na     | na |
| chr15 | 15299794 | 15300227 | 434 Sat49CF  | na     | na |
| chr15 | 15347654 | 15347748 | 95 Sat88CF   | na     | na |
| chr15 | 15861747 | 15861809 | 63 Sat4CF    | lred   | na |
| chr15 | 15861810 | 15862918 | 1109 Sat4CF  | lred   | na |
| chr15 | 16089668 | 16089761 | 94 Sat105CF  | na     | na |
| chr15 | 16863840 | 16863935 | 96 Sat179CF  | na     | na |
| chr15 | 18229806 | 18229862 | 57 Sat66CF   | na     | na |
| chr15 | 19117206 | 19117434 | 229 Sat17CF  | na     | na |
| chr15 | 20036504 | 20036850 | 347 Sat2CF   | purple | na |
| chr15 | 20036521 | 20036827 | 307 Sat2CF   | purple | na |
| chr15 | 20036592 | 20036786 | 195 Sat2CF   | purple | na |
| chr15 | 20036608 | 20036810 | 203 Sat2CF   | purple | na |
| chr15 | 20061982 | 20062256 | 275 Sat2CF   | purple | na |
| chr15 | 20062017 | 20062325 | 309 Sat2CF   | purple | na |
| chr15 | 20062124 | 20062364 | 241 Sat2CF   | purple | na |
| chr15 | 20170497 | 20171370 | 874 Sat7CF   | lime   | na |
| chr15 | 21224262 | 21224422 | 161 Sat38CF  | na     | na |
| chr15 | 21224281 | 21224451 | 171 Sat44CF  | na     | na |

|       |          |          |               |        |         |
|-------|----------|----------|---------------|--------|---------|
| chr15 | 25081138 | 25081471 | 334 Sat39CF   | na     | na      |
| chr15 | 39669668 | 39669857 | 190 Sat17CF   | na     | na      |
| chr15 | 41177645 | 41177755 | 111 Sat123CF  | na     | na      |
| chr15 | 42767664 | 42767767 | 104 SUBTEL_sa | na     | na      |
| chr15 | 43555751 | 43555826 | 76 Sat143CF   | na     | na      |
| chr15 | 43555759 | 43557906 | 2148 Sat143CF | na     | na      |
| chr15 | 45680456 | 45680720 | 265 SAT1_CF   | blue   | na      |
| chr15 | 45701178 | 45702302 | 1125 Carsat2  | orange | na      |
| chr15 | 45702387 | 45703165 | 779 Carsat2   | orange | na      |
| chr15 | 45712720 | 45713301 | 582 Carsat2   | orange | na      |
| chr15 | 45713042 | 45713579 | 538 CarSat1   | red    | na      |
| chr15 | 45713612 | 45716213 | 2602 CarSat1  | red    | na      |
| chr15 | 45723672 | 45725271 | 1600 Carsat2  | orange | na      |
| chr15 | 45728380 | 45728942 | 563 Carsat2   | orange | na      |
| chr15 | 45729125 | 45729283 | 159 Carsat2   | orange | na      |
| chr15 | 48509523 | 48509562 | 40 Sat26CF    | na     | na      |
| chr15 | 58985248 | 58985319 | 72 Sat42CF    | na     | na      |
| chr15 | 64231612 | 64231654 | 43 Sat139CF   | na     | na      |
| chr15 | 65801491 | 65801564 | 74 Sat47CF    | na     | na      |
| chr15 | 66460358 | 66460719 | 362 Sat69CF   | na     | na      |
| chr15 | 66481193 | 66481308 | 116 Sat21CF   | na     | na      |
| chr15 | 66799958 | 66800308 | 351 Sat122CF  | na     | na      |
| chr15 | 66809823 | 66810146 | 324 Sat19CF   | na     | na      |
| chr15 | 66860536 | 66860589 | 54 Sat14CF    | na     | na      |
| chr15 | 66994773 | 66994963 | 191 Sat74CF   | na     | na      |
| chr15 | 66994873 | 66994971 | 99 Sat74CF    | na     | na      |
| chr16 | 3017589  | 3018523  | 935 Sat2CF    | purple | pericen |
| chr16 | 3018075  | 3018582  | 508 Sat2CF    | purple | pericen |
| chr16 | 3062366  | 3063369  | 1004 Sat29CF  | na     | pericen |
| chr16 | 3063160  | 3063395  | 236 Sat29CF   | na     | pericen |
| chr16 | 3075629  | 3075835  | 207 Sat23CF   | na     | pericen |
| chr16 | 3119784  | 3120160  | 377 Sat79CF   | na     | pericen |
| chr16 | 3424229  | 3424336  | 108 Sat5CF    | stalk  | pericen |
| chr16 | 3701985  | 3702068  | 84 Sat49CF    | na     | pericen |
| chr16 | 3730256  | 3730372  | 117 Sat24CF   | na     | pericen |
| chr16 | 4202958  | 4203089  | 132 Sat14CF   | na     | pericen |
| chr16 | 4277035  | 4277575  | 541 Sat7CF    | lime   | pericen |
| chr16 | 4277043  | 4277680  | 638 Sat7CF    | lime   | pericen |
| chr16 | 4477112  | 4477480  | 369 Sat7CF    | lime   | pericen |
| chr16 | 4684997  | 4686102  | 1106 Sat7CF   | lime   | pericen |
| chr16 | 4714538  | 4715189  | 652 Sat7CF    | lime   | pericen |
| chr16 | 4760402  | 4760906  | 505 Sat7CF    | lime   | pericen |

|       |          |          |               |        |         |
|-------|----------|----------|---------------|--------|---------|
| chr16 | 4760507  | 4760903  | 397 Sat7CF    | lime   | pericen |
| chr16 | 4760820  | 4760919  | 100 Sat7CF    | lime   | pericen |
| chr16 | 5117879  | 5117918  | 40 Sat130CF   | na     | na      |
| chr16 | 5527425  | 5527472  | 48 Sat145CF   | na     | na      |
| chr16 | 5638036  | 5638125  | 90 Sat36CF    | na     | na      |
| chr16 | 10511119 | 10511929 | 811 Sat41CF   | na     | na      |
| chr16 | 13552378 | 13552747 | 370 Sat7CF    | lime   | na      |
| chr16 | 13578319 | 13578689 | 371 Sat7CF    | lime   | na      |
| chr16 | 13629402 | 13629539 | 138 Sat7CF    | lime   | na      |
| chr16 | 15335825 | 15335894 | 70 Sat12CF    | na     | na      |
| chr16 | 16408200 | 16408460 | 261 Sat7CF    | lime   | na      |
| chr16 | 16408200 | 16408460 | 261 Sat7CF    | lime   | na      |
| chr16 | 16841656 | 16842761 | 1106 Sat7CF   | lime   | na      |
| chr16 | 16857395 | 16858348 | 954 Sat7CF    | lime   | na      |
| chr16 | 16894931 | 16896038 | 1108 Sat7CF   | lime   | na      |
| chr16 | 17121746 | 17121882 | 137 Carsat3   | green  | na      |
| chr16 | 17122329 | 17122554 | 226 Carsat3   | green  | na      |
| chr16 | 17486251 | 17486413 | 163 Carsat3   | green  | na      |
| chr16 | 17638182 | 17638388 | 207 Carsat3   | green  | na      |
| chr16 | 17659198 | 17659415 | 218 Carsat3   | green  | na      |
| chr16 | 18772439 | 18772582 | 144 Sat14CF   | na     | na      |
| chr16 | 20000734 | 20000829 | 96 Sat109CF   | na     | na      |
| chr16 | 20046091 | 20046148 | 58 Sat95CF    | na     | na      |
| chr16 | 20383689 | 20384897 | 1209 Sat108CF | na     | na      |
| chr16 | 20384667 | 20384944 | 278 Sat97CF   | na     | na      |
| chr16 | 21028759 | 21028828 | 70 Sat48CF    | na     | na      |
| chr16 | 21717670 | 21717860 | 191 Sat86CF   | na     | na      |
| chr16 | 22522817 | 22522962 | 146 Sat96CF   | na     | na      |
| chr16 | 22522829 | 22523009 | 181 Sat96CF   | na     | na      |
| chr16 | 22820060 | 22820218 | 159 Sat120CF  | na     | na      |
| chr16 | 23205471 | 23205785 | 315 Sat53CF   | na     | na      |
| chr16 | 23205562 | 23205774 | 213 Sat31CF   | na     | na      |
| chr16 | 23205598 | 23205774 | 177 Sat31CF   | na     | na      |
| chr16 | 23205635 | 23205815 | 181 Sat31CF   | na     | na      |
| chr16 | 23369100 | 23369228 | 129 Sat16CF   | na     | na      |
| chr16 | 23503338 | 23503595 | 258 Sat14CF   | na     | na      |
| chr16 | 23503391 | 23503609 | 219 Sat14CF   | na     | na      |
| chr16 | 23913511 | 23913567 | 57 Sat67CF    | na     | na      |
| chr16 | 24049095 | 24050014 | 920 Sat7CF    | lime   | na      |
| chr16 | 24050209 | 24053043 | 2835 Sat7CF   | lime   | na      |
| chr16 | 24167885 | 24169613 | 1729 Carsat2  | orange | na      |
| chr16 | 24173082 | 24173828 | 747 Carsat2   | orange | na      |

|       |          |          |              |        |    |
|-------|----------|----------|--------------|--------|----|
| chr16 | 24175684 | 24176537 | 854 Carsat2  | orange | na |
| chr16 | 24177548 | 24178859 | 1312 Sat2CF  | purple | na |
| chr16 | 24177794 | 24179152 | 1359 Sat2CF  | purple | na |
| chr16 | 24178341 | 24179699 | 1359 Sat2CF  | purple | na |
| chr16 | 24179387 | 24180721 | 1335 Sat2CF  | purple | na |
| chr16 | 24179726 | 24181060 | 1335 Sat2CF  | purple | na |
| chr16 | 24179865 | 24181194 | 1330 Sat2CF  | purple | na |
| chr16 | 24180476 | 24181279 | 804 Sat2CF   | purple | na |
| chr16 | 24201006 | 24201046 | 41 SAT1_CF   | blue   | na |
| chr16 | 24201397 | 24201672 | 276 SAT1_CF  | blue   | na |
| chr16 | 24228259 | 24229226 | 968 CarSat1  | red    | na |
| chr16 | 24229248 | 24229963 | 716 CarSat1  | red    | na |
| chr16 | 24229982 | 24231021 | 1040 CarSat1 | red    | na |
| chr16 | 32420444 | 32420480 | 37 Sat33CF   | na     | na |
| chr16 | 33136981 | 33137670 | 690 Sat7CF   | lime   | na |
| chr16 | 33137457 | 33137700 | 244 Sat7CF   | lime   | na |
| chr16 | 41562684 | 41563035 | 352 Sat7CF   | lime   | na |
| chr16 | 42947608 | 42947959 | 352 Sat7CF   | lime   | na |
| chr16 | 43014376 | 43014727 | 352 Sat7CF   | lime   | na |
| chr16 | 43017374 | 43017650 | 277 Sat7CF   | lime   | na |
| chr16 | 44351001 | 44351393 | 393 Sat7CF   | lime   | na |
| chr16 | 44351042 | 44351380 | 339 Sat7CF   | lime   | na |
| chr16 | 44378224 | 44378606 | 383 Sat7CF   | lime   | na |
| chr16 | 50263496 | 50264172 | 677 Sat7CF   | lime   | na |
| chr16 | 50273389 | 50273785 | 397 Sat7CF   | lime   | na |
| chr16 | 50273582 | 50273823 | 242 Sat7CF   | lime   | na |
| chr16 | 50291215 | 50291892 | 678 Sat7CF   | lime   | na |
| chr16 | 53666080 | 53666639 | 560 Sat7CF   | lime   | na |
| chr16 | 53998626 | 53999187 | 562 Sat7CF   | lime   | na |
| chr16 | 53998687 | 53999188 | 502 Sat7CF   | lime   | na |
| chr16 | 54540257 | 54540311 | 55 Sat63CF   | na     | na |
| chr16 | 54605418 | 54606089 | 672 Sat7CF   | lime   | na |
| chr16 | 54618679 | 54619353 | 675 Sat7CF   | lime   | na |
| chr16 | 55239587 | 55240256 | 670 Sat7CF   | lime   | na |
| chr16 | 55239602 | 55240161 | 560 Sat7CF   | lime   | na |
| chr16 | 56344376 | 56344579 | 204 Sat168CF | na     | na |
| chr16 | 56545950 | 56546304 | 355 Sat7CF   | lime   | na |
| chr16 | 56546100 | 56546343 | 244 Sat7CF   | lime   | na |
| chr16 | 56948284 | 56948817 | 534 Carsat3  | green  | na |
| chr16 | 56948854 | 56948986 | 133 Carsat3  | green  | na |
| chr16 | 56984092 | 56984629 | 538 Carsat3  | green  | na |
| chr16 | 56984660 | 56984769 | 110 Carsat3  | green  | na |

|       |          |          |               |        |         |
|-------|----------|----------|---------------|--------|---------|
| chr16 | 57002788 | 57003141 | 354 Sat7CF    | lime   | na      |
| chr16 | 57002937 | 57003180 | 244 Sat7CF    | lime   | na      |
| chr16 | 57181927 | 57182171 | 245 Sat94CF   | na     | na      |
| chr16 | 57182102 | 57182191 | 90 Sat94CF    | na     | na      |
| chr16 | 57402178 | 57402959 | 782 Sat34CF   | na     | na      |
| chr16 | 57402294 | 57403040 | 747 Sat34CF   | na     | na      |
| chr16 | 57762538 | 57762595 | 58 Sat98CF    | na     | na      |
| chr16 | 58181555 | 58181718 | 164 Sat57CF   | na     | na      |
| chr16 | 58181632 | 58181787 | 156 Sat57CF   | na     | na      |
| chr16 | 58384593 | 58386112 | 1520 Sat107CF | na     | na      |
| chr16 | 59343139 | 59343345 | 207 Sat157CF  | na     | na      |
| chr16 | 60118331 | 60118397 | 67 Sat152CF   | na     | na      |
| chr16 | 61767620 | 61768712 | 1093 Sat141CF | na     | na      |
| chr16 | 61990969 | 61991273 | 305 Sat7CF    | lime   | na      |
| chr16 | 61991067 | 61991304 | 238 Sat7CF    | lime   | na      |
| chr16 | 62037819 | 62038488 | 670 Sat7CF    | lime   | na      |
| chr16 | 62256782 | 62257451 | 670 Sat7CF    | lime   | na      |
| chr16 | 62330595 | 62330880 | 286 Sat7CF    | lime   | na      |
| chr16 | 62330674 | 62330911 | 238 Sat7CF    | lime   | na      |
| chr16 | 62349442 | 62350105 | 664 Sat7CF    | lime   | na      |
| chr16 | 62411334 | 62411638 | 305 Sat7CF    | lime   | na      |
| chr16 | 62411432 | 62411669 | 238 Sat7CF    | lime   | na      |
| chr16 | 62431597 | 62431970 | 374 Sat7CF    | lime   | na      |
| chr16 | 62431636 | 62431979 | 344 Sat7CF    | lime   | na      |
| chr17 | 3025673  | 3025870  | 198 Sat2CF    | purple | pericen |
| chr17 | 3127500  | 3127797  | 298 Sat44CF   | na     | pericen |
| chr17 | 3259360  | 3259501  | 142 Sat132CF  | na     | pericen |
| chr17 | 3299643  | 3299804  | 162 Sat16CF   | na     | pericen |
| chr17 | 3300035  | 3300281  | 247 Sat16CF   | na     | pericen |
| chr17 | 3319755  | 3320069  | 315 Sat49CF   | na     | pericen |
| chr17 | 3326552  | 3326870  | 319 Sat19CF   | na     | pericen |
| chr17 | 3336110  | 3336503  | 394 Sat24CF   | na     | pericen |
| chr17 | 3378970  | 3379655  | 686 Sat52CF   | na     | pericen |
| chr17 | 3443251  | 3443297  | 47 Sat19CF    | na     | pericen |
| chr17 | 3465792  | 3466005  | 214 Sat84CF   | na     | pericen |
| chr17 | 3499126  | 3499752  | 627 Sat42CF   | na     | pericen |
| chr17 | 3614753  | 3614892  | 140 Sat53CF   | na     | pericen |
| chr17 | 3614768  | 3616073  | 1306 Sat53CF  | na     | pericen |
| chr17 | 3699469  | 3699510  | 42 Sat5CF     | stalk  | pericen |
| chr17 | 3819169  | 3819273  | 105 Sat13CF   | na     | pericen |
| chr17 | 3840653  | 3841021  | 369 Sat60CF   | na     | pericen |
| chr17 | 3924979  | 3925911  | 933 Sat34CF   | na     | pericen |

|       |          |          |              |           |         |
|-------|----------|----------|--------------|-----------|---------|
| chr17 | 4151311  | 4151808  | 498 Sat42CF  | na        | pericen |
| chr17 | 4419125  | 4419294  | 170 Sat5CF   | stalk     | pericen |
| chr17 | 4459732  | 4459899  | 168 Sat30CF  | na        | pericen |
| chr17 | 4523195  | 4523328  | 134 Sat57CF  | na        | pericen |
| chr17 | 4523330  | 4524533  | 1204 Sat57CF | na        | pericen |
| chr17 | 4524534  | 4524575  | 42 Sat57CF   | na        | pericen |
| chr17 | 4597257  | 4597779  | 523 Sat49CF  | na        | pericen |
| chr17 | 4597486  | 4597894  | 409 Sat49CF  | na        | pericen |
| chr17 | 4668911  | 4669410  | 500 Sat28CF  | na        | pericen |
| chr17 | 5572118  | 5572305  | 188 Sat17CF  | na        | na      |
| chr17 | 5830795  | 5831038  | 244 Sat72CF  | na        | na      |
| chr17 | 5831788  | 5832103  | 316 Sat72CF  | na        | na      |
| chr17 | 5953254  | 5953409  | 156 Sat5CF   | stalk     | na      |
| chr17 | 6255239  | 6255390  | 152 Sat5CF   | stalk     | na      |
| chr17 | 6746208  | 6746323  | 116 Sat83CF  | na        | na      |
| chr17 | 6746212  | 6746391  | 180 Sat106CF | na        | na      |
| chr17 | 7496823  | 7496897  | 75 Sat42CF   | na        | na      |
| chr17 | 8091742  | 8091904  | 163 Sat50CF  | na        | na      |
| chr17 | 8561302  | 8561397  | 96 Sat72CF   | na        | na      |
| chr17 | 8623152  | 8623234  | 83 Sat118CF  | na        | na      |
| chr17 | 8782738  | 8783328  | 591 Sat4CF   | lred      | na      |
| chr17 | 10124011 | 10124045 | 35 Sat74CF   | na        | na      |
| chr17 | 10281805 | 10281868 | 64 Sat3CF    | optpurple | na      |
| chr17 | 10897165 | 10897237 | 73 Sat72CF   | na        | na      |
| chr17 | 11228269 | 11228375 | 107 Sat83CF  | na        | na      |
| chr17 | 13962264 | 13962626 | 363 Sat30CF  | na        | na      |
| chr17 | 14693425 | 14693690 | 266 SAT1_CF  | blue      | na      |
| chr17 | 17484532 | 17484597 | 66 Carsat3   | green     | na      |
| chr17 | 18210504 | 18210547 | 44 Sat50CF   | na        | na      |
| chr17 | 18608153 | 18608491 | 339 SAT1_CF  | blue      | na      |
| chr17 | 21025833 | 21025923 | 91 Sat19CF   | na        | na      |
| chr17 | 23570083 | 23570125 | 43 Sat103CF  | na        | na      |
| chr17 | 24069586 | 24069625 | 40 Sat99CF   | na        | na      |
| chr17 | 24487130 | 24488163 | 1034 Sat36CF | na        | na      |
| chr17 | 24595126 | 24595997 | 872 Sat36CF  | na        | na      |
| chr17 | 24606139 | 24607997 | 1859 Sat36CF | na        | na      |
| chr17 | 24607998 | 24608130 | 133 Sat36CF  | na        | na      |
| chr17 | 24608349 | 24608600 | 252 Sat36CF  | na        | na      |
| chr17 | 24608365 | 24608578 | 214 Sat36CF  | na        | na      |
| chr17 | 24724337 | 24724838 | 502 Sat36CF  | na        | na      |
| chr17 | 25445728 | 25445990 | 263 CarSat1  | red       | na      |
| chr17 | 26655510 | 26655598 | 89 Sat46CF   | na        | na      |

|       |          |          |              |        |    |
|-------|----------|----------|--------------|--------|----|
| chr17 | 27741323 | 27741468 | 146 Sat57CF  | na     | na |
| chr17 | 31982984 | 31983033 | 50 Sat36CF   | na     | na |
| chr17 | 33340360 | 33340769 | 410 Carsat3  | green  | na |
| chr17 | 33483589 | 33483638 | 50 Sat12CF   | na     | na |
| chr17 | 33868993 | 33869049 | 57 Sat169CF  | na     | na |
| chr17 | 36337317 | 36337440 | 124 Carsat3  | green  | na |
| chr17 | 37049077 | 37049157 | 81 Sat43CF   | na     | na |
| chr17 | 37102356 | 37102448 | 93 CarSat1   | red    | na |
| chr17 | 37962463 | 37963432 | 970 Carsat3  | green  | na |
| chr17 | 37978502 | 37979244 | 743 Carsat3  | green  | na |
| chr17 | 37994277 | 37995078 | 802 Carsat3  | green  | na |
| chr17 | 38024200 | 38025246 | 1047 Carsat3 | green  | na |
| chr17 | 38025284 | 38025749 | 466 Carsat3  | green  | na |
| chr17 | 38562867 | 38562983 | 117 Sat55CF  | na     | na |
| chr17 | 40811729 | 40811812 | 84 Sat139CF  | na     | na |
| chr17 | 42521877 | 42521950 | 74 Sat32CF   | na     | na |
| chr17 | 43523214 | 43523386 | 173 Carsat3  | green  | na |
| chr17 | 47587423 | 47587983 | 561 Carsat3  | green  | na |
| chr17 | 48096251 | 48096363 | 113 Sat17CF  | na     | na |
| chr17 | 52516013 | 52517835 | 1823 Sat26CF | na     | na |
| chr17 | 52516212 | 52519239 | 3028 Sat26CF | na     | na |
| chr17 | 52516592 | 52519521 | 2930 Sat26CF | na     | na |
| chr17 | 52516932 | 52519944 | 3013 Sat26CF | na     | na |
| chr17 | 52517340 | 52520367 | 3028 Sat26CF | na     | na |
| chr17 | 52517763 | 52520790 | 3028 Sat26CF | na     | na |
| chr17 | 52518183 | 52521219 | 3037 Sat26CF | na     | na |
| chr17 | 52518603 | 52521642 | 3040 Sat26CF | na     | na |
| chr17 | 52520436 | 52521783 | 1348 Sat26CF | na     | na |
| chr17 | 52921791 | 52921952 | 162 Sat80CF  | na     | na |
| chr17 | 53786194 | 53786306 | 113 Sat12CF  | na     | na |
| chr17 | 53921033 | 53921111 | 79 Sat12CF   | na     | na |
| chr17 | 54074411 | 54074586 | 176 Sat12CF  | na     | na |
| chr17 | 54550079 | 54550984 | 906 Carsat2  | orange | na |
| chr17 | 54571571 | 54577418 | 5848 Carsat2 | orange | na |
| chr17 | 54577853 | 54579865 | 2013 Carsat2 | orange | na |
| chr17 | 54579914 | 54580232 | 319 Carsat2  | orange | na |
| chr17 | 54580300 | 54581776 | 1477 Carsat2 | orange | na |
| chr17 | 54582041 | 54582259 | 219 Carsat2  | orange | na |
| chr17 | 54582304 | 54583288 | 985 Carsat2  | orange | na |
| chr17 | 54593796 | 54594363 | 568 Carsat2  | orange | na |
| chr17 | 54752922 | 54753038 | 117 CarSat1  | red    | na |
| chr17 | 54753237 | 54753899 | 663 CarSat1  | red    | na |



|       |          |          |      |          |        |    |
|-------|----------|----------|------|----------|--------|----|
| chr17 | 55172526 | 55172672 | 147  | CarSat1  | red    | na |
| chr17 | 55989829 | 55990217 | 389  | Sat108CF | na     | na |
| chr17 | 55989833 | 55990271 | 439  | Sat108CF | na     | na |
| chr17 | 58952463 | 58952509 | 47   | CarSat1  | red    | na |
| chr17 | 62251548 | 62251735 | 188  | SAT1_CF  | blue   | na |
| chr17 | 63360979 | 63361059 | 81   | Sat137CF | na     | na |
| chr17 | 63644793 | 63644944 | 152  | Sat179CF | na     | na |
| chr17 | 63803000 | 63803048 | 49   | Sat73CF  | na     | na |
| chr17 | 64173589 | 64173750 | 162  | Sat133CF | na     | na |
| chr17 | 64173611 | 64173843 | 233  | Sat133CF | na     | na |
| chr17 | 64173803 | 64175156 | 1354 | Sat133CF | na     | na |
| chr17 | 64270384 | 64270700 | 317  | Sat46CF  | na     | na |
| chr17 | 64270417 | 64272412 | 1996 | Sat46CF  | na     | na |
| chr17 | 64270670 | 64272995 | 2326 | Sat46CF  | na     | na |
| chr17 | 64271256 | 64273570 | 2315 | Sat46CF  | na     | na |
| chr17 | 64273493 | 64273792 | 300  | Sat46CF  | na     | na |
| chr17 | 64296035 | 64296227 | 193  | Sat22CF  | na     | na |
| chr17 | 64296062 | 64301646 | 5585 | Sat22CF  | na     | na |
| chr17 | 64296860 | 64303293 | 6434 | Sat22CF  | na     | na |
| chr17 | 64298507 | 64304026 | 5520 | Sat22CF  | na     | na |
| chr17 | 64303247 | 64304133 | 887  | Sat22CF  | na     | na |
| chr17 | 64392059 | 64392149 | 91   | Sat22CF  | na     | na |
| chr17 | 64392082 | 64392381 | 300  | Sat66CF  | na     | na |
| chr17 | 64392129 | 64397547 | 5419 | Sat66CF  | na     | na |
| chr17 | 64397663 | 64398989 | 1327 | Sat46CF  | na     | na |
| chr17 | 65113188 | 65113551 | 364  | Carsat2  | orange | na |
| chr17 | 65113602 | 65113796 | 195  | Carsat2  | orange | na |
| chr17 | 65114038 | 65114142 | 105  | Carsat2  | orange | na |
| chr17 | 65123546 | 65123868 | 323  | Carsat2  | orange | na |
| chr17 | 65127180 | 65127284 | 105  | Carsat2  | orange | na |
| chr17 | 65127526 | 65127720 | 195  | Carsat2  | orange | na |
| chr17 | 65127761 | 65128283 | 523  | Carsat2  | orange | na |
| chr17 | 65526682 | 65526744 | 63   | Sat88CF  | na     | na |
| chr17 | 66288161 | 66288278 | 118  | Sat27CF  | na     | na |
| chr17 | 66617264 | 66617500 | 237  | Sat21CF  | na     | na |
| chr17 | 66759009 | 66759054 | 46   | Sat46CF  | na     | na |
| chr17 | 67105637 | 67105673 | 37   | CarSat1  | red    | na |
| chr17 | 67105880 | 67107084 | 1205 | CarSat1  | red    | na |
| chr17 | 67107118 | 67107178 | 61   | CarSat1  | red    | na |
| chr17 | 67107361 | 67109024 | 1664 | CarSat1  | red    | na |
| chr17 | 67109053 | 67110025 | 973  | CarSat1  | red    | na |
| chr17 | 67110222 | 67112366 | 2145 | CarSat1  | red    | na |

|       |          |          |      |          |       |         |
|-------|----------|----------|------|----------|-------|---------|
| chr17 | 67112785 | 67112810 | 26   | CarSat1  | red   | na      |
| chr17 | 67167062 | 67167945 | 884  | Sat7CF   | lime  | na      |
| chr17 | 67249212 | 67250085 | 874  | Sat7CF   | lime  | na      |
| chr18 | 3260802  | 3260986  | 185  | Sat42CF  | na    | pericen |
| chr18 | 3677981  | 3678050  | 70   | Sat26CF  | na    | pericen |
| chr18 | 3686680  | 3686883  | 204  | Sat17CF  | na    | pericen |
| chr18 | 3784109  | 3784307  | 199  | Sat30CF  | na    | pericen |
| chr18 | 4136273  | 4136497  | 225  | Sat4CF   | lred  | pericen |
| chr18 | 4136307  | 4136507  | 201  | Sat4CF   | lred  | pericen |
| chr18 | 4136791  | 4136927  | 137  | Sat4CF   | lred  | pericen |
| chr18 | 4879606  | 4879850  | 245  | CarSat1  | red   | pericen |
| chr18 | 4884752  | 4884925  | 174  | Sat166CF | na    | pericen |
| chr18 | 5074253  | 5074305  | 53   | Sat5CF   | stalk | na      |
| chr18 | 5074259  | 5074315  | 57   | Sat5CF   | stalk | na      |
| chr18 | 5393240  | 5393392  | 153  | Sat74CF  | na    | na      |
| chr18 | 5393249  | 5393410  | 162  | Sat74CF  | na    | na      |
| chr18 | 5581044  | 5583739  | 2696 | Sat60CF  | na    | na      |
| chr18 | 5585845  | 5586225  | 381  | Sat97CF  | na    | na      |
| chr18 | 5586438  | 5586527  | 90   | Sat60CF  | na    | na      |
| chr18 | 5839581  | 5840108  | 528  | Sat51CF  | na    | na      |
| chr18 | 6605109  | 6605202  | 94   | Carsat3  | green | na      |
| chr18 | 6605241  | 6605365  | 125  | Carsat3  | green | na      |
| chr18 | 6792733  | 6792776  | 44   | Sat26CF  | na    | na      |
| chr18 | 7348661  | 7348705  | 45   | Sat94CF  | na    | na      |
| chr18 | 8048528  | 8048582  | 55   | Sat19CF  | na    | na      |
| chr18 | 8048534  | 8048593  | 60   | Sat19CF  | na    | na      |
| chr18 | 8500639  | 8500995  | 357  | Sat14CF  | na    | na      |
| chr18 | 8500730  | 8501036  | 307  | Sat14CF  | na    | na      |
| chr18 | 8504438  | 8504729  | 292  | Sat14CF  | na    | na      |
| chr18 | 8504545  | 8504729  | 185  | Sat14CF  | na    | na      |
| chr18 | 8505070  | 8505942  | 873  | Sat14CF  | na    | na      |
| chr18 | 8507909  | 8508093  | 185  | Sat14CF  | na    | na      |
| chr18 | 8507978  | 8508265  | 288  | Sat14CF  | na    | na      |
| chr18 | 8508381  | 8508705  | 325  | Sat14CF  | na    | na      |
| chr18 | 8509641  | 8509884  | 244  | Sat14CF  | na    | na      |
| chr18 | 8509750  | 8509977  | 228  | Sat14CF  | na    | na      |
| chr18 | 12564738 | 12564778 | 41   | Sat118CF | na    | na      |
| chr18 | 13115218 | 13115446 | 229  | Sat34CF  | na    | na      |
| chr18 | 14365394 | 14365525 | 132  | Sat55CF  | na    | na      |
| chr18 | 15128735 | 15128825 | 91   | Sat66CF  | na    | na      |
| chr18 | 15927614 | 15927911 | 298  | Sat178CF | na    | na      |
| chr18 | 17501262 | 17501319 | 58   | Sat18CF  | na    | na      |

|       |          |          |              |        |    |
|-------|----------|----------|--------------|--------|----|
| chr18 | 18124703 | 18124753 | 51 Sat139CF  | na     | na |
| chr18 | 18633707 | 18634050 | 344 Sat28CF  | na     | na |
| chr18 | 18684816 | 18685022 | 207 Carsat3  | green  | na |
| chr18 | 18913003 | 18913098 | 96 Sat39CF   | na     | na |
| chr18 | 19262064 | 19262117 | 54 Sat154CF  | na     | na |
| chr18 | 19587081 | 19587402 | 322 Carsat3  | green  | na |
| chr18 | 26861632 | 26861748 | 117 Sat128CF | na     | na |
| chr18 | 28202993 | 28203030 | 38 CarSat1   | red    | na |
| chr18 | 28205692 | 28206452 | 761 CarSat1  | red    | na |
| chr18 | 28247525 | 28248708 | 1184 SAT1_CF | blue   | na |
| chr18 | 28250925 | 28251354 | 430 Sat2CF   | purple | na |
| chr18 | 28250983 | 28251375 | 393 Sat2CF   | purple | na |
| chr18 | 28251051 | 28251450 | 400 Sat2CF   | purple | na |
| chr18 | 28295856 | 28296417 | 562 CarSat1  | red    | na |
| chr18 | 28296446 | 28297494 | 1049 SAT1_CF | blue   | na |
| chr18 | 28297537 | 28299570 | 2034 SAT1_CF | blue   | na |
| chr18 | 28299615 | 28300658 | 1044 SAT1_CF | blue   | na |
| chr18 | 28303739 | 28303934 | 196 CarSat1  | red    | na |
| chr18 | 28305260 | 28305611 | 352 Sat2CF   | purple | na |
| chr18 | 28310054 | 28310483 | 430 SAT1_CF  | blue   | na |
| chr18 | 28532977 | 28533594 | 618 Sat102CF | na     | na |
| chr18 | 28558306 | 28558574 | 269 Sat39CF  | na     | na |
| chr18 | 28558336 | 28558570 | 235 Sat42CF  | na     | na |
| chr18 | 28622360 | 28622833 | 474 SAT1_CF  | blue   | na |
| chr18 | 28641528 | 28641968 | 441 Sat74CF  | na     | na |
| chr18 | 28651815 | 28652600 | 786 Sat179CF | na     | na |
| chr18 | 29467122 | 29467439 | 318 Sat18CF  | na     | na |
| chr18 | 31190656 | 31190691 | 36 Sat108CF  | na     | na |
| chr18 | 35405478 | 35405514 | 37 Sat8CF    | dgreen | na |
| chr18 | 36928025 | 36928144 | 120 Carsat2  | orange | na |
| chr18 | 48287405 | 48288641 | 1237 Sat80CF | na     | na |
| chr18 | 48288620 | 48288697 | 78 Sat80CF   | na     | na |
| chr18 | 48401736 | 48402682 | 947 Sat158CF | na     | na |
| chr18 | 48402700 | 48403638 | 939 Sat158CF | na     | na |
| chr18 | 48512981 | 48513295 | 315 Sat56CF  | na     | na |
| chr18 | 48513770 | 48514043 | 274 Sat56CF  | na     | na |
| chr18 | 48514256 | 48514556 | 301 Sat56CF  | na     | na |
| chr18 | 48515655 | 48516112 | 458 Sat73CF  | na     | na |
| chr18 | 48516297 | 48516383 | 87 Sat73CF   | na     | na |
| chr18 | 48516362 | 48516719 | 358 Sat56CF  | na     | na |
| chr18 | 48516824 | 48517065 | 242 Sat73CF  | na     | na |
| chr18 | 48517530 | 48518035 | 506 Sat73CF  | na     | na |

|       |          |          |               |        |    |
|-------|----------|----------|---------------|--------|----|
| chr18 | 48518285 | 48518642 | 358 Sat56CF   | na     | na |
| chr18 | 48557535 | 48557995 | 461 Sat56CF   | na     | na |
| chr18 | 48558202 | 48558541 | 340 Sat56CF   | na     | na |
| chr18 | 48558957 | 48559292 | 336 Sat56CF   | na     | na |
| chr18 | 48559385 | 48559721 | 337 Sat56CF   | na     | na |
| chr18 | 48559802 | 48560397 | 596 Sat56CF   | na     | na |
| chr18 | 48559944 | 48564076 | 4133 Sat56CF  | na     | na |
| chr18 | 48563672 | 48565441 | 1770 Sat56CF  | na     | na |
| chr18 | 48803963 | 48804124 | 162 Sat131CF  | na     | na |
| chr18 | 49005547 | 49005795 | 249 Sat49CF   | na     | na |
| chr18 | 49118425 | 49118646 | 222 Sat39CF   | na     | na |
| chr18 | 49138090 | 49139393 | 1304 Sat12CF  | na     | na |
| chr18 | 49138237 | 49140004 | 1768 Sat12CF  | na     | na |
| chr18 | 49138481 | 49140177 | 1697 Sat12CF  | na     | na |
| chr18 | 49231893 | 49232704 | 812 Sat59CF   | na     | na |
| chr18 | 49232247 | 49236655 | 4409 Sat59CF  | na     | na |
| chr18 | 49235780 | 49236930 | 1151 Sat59CF  | na     | na |
| chr18 | 49236609 | 49236970 | 362 Sat59CF   | na     | na |
| chr18 | 49352524 | 49352649 | 126 Sat86CF   | na     | na |
| chr18 | 49712073 | 49713167 | 1095 Sat145CF | na     | na |
| chr18 | 49712198 | 49713315 | 1118 Sat145CF | na     | na |
| chr18 | 49712322 | 49713440 | 1119 Sat145CF | na     | na |
| chr18 | 49712966 | 49713511 | 546 Sat145CF  | na     | na |
| chr18 | 50193219 | 50193279 | 61 SAT1_CF    | blue   | na |
| chr18 | 50216103 | 50216163 | 61 SAT1_CF    | blue   | na |
| chr18 | 50270772 | 50271881 | 1110 Sat4CF   | lred   | na |
| chr18 | 50324636 | 50324709 | 74 Sat156CF   | na     | na |
| chr18 | 51902319 | 51902380 | 62 Sat2CF     | purple | na |
| chr18 | 51987446 | 51987733 | 288 Sat5CF    | stalk  | na |
| chr18 | 54236006 | 54236099 | 94 Sat21CF    | na     | na |
| chr18 | 54276143 | 54276358 | 216 Sat49CF   | na     | na |
| chr18 | 54276166 | 54276358 | 193 Sat49CF   | na     | na |
| chr18 | 54583490 | 54583544 | 55 Sat130CF   | na     | na |
| chr18 | 54821088 | 54821154 | 67 Sat101CF   | na     | na |
| chr18 | 55413907 | 55413949 | 43 Sat172CF   | na     | na |
| chr18 | 56755483 | 56755565 | 83 Sat103CF   | na     | na |
| chr18 | 57109208 | 57109312 | 105 Sat52CF   | na     | na |
| chr18 | 57126008 | 57127809 | 1802 Sat25CF  | na     | na |
| chr18 | 57126930 | 57128786 | 1857 Sat25CF  | na     | na |
| chr18 | 57128787 | 57130899 | 2113 Sat25CF  | na     | na |
| chr18 | 57129986 | 57131172 | 1187 Sat25CF  | na     | na |
| chr18 | 57131196 | 57133243 | 2048 Sat25CF  | na     | na |

|       |          |          |               |        |         |
|-------|----------|----------|---------------|--------|---------|
| chr18 | 57133248 | 57133329 | 82 Sat25CF    | na     | na      |
| chr18 | 57133334 | 57134984 | 1651 Sat25CF  | na     | na      |
| chr18 | 57134082 | 57135974 | 1893 Sat25CF  | na     | na      |
| chr18 | 57135840 | 57137729 | 1890 Sat25CF  | na     | na      |
| chr18 | 57137730 | 57138963 | 1234 Sat25CF  | na     | na      |
| chr18 | 57139244 | 57139309 | 66 Sat25CF    | na     | na      |
| chr18 | 57139253 | 57139309 | 57 Sat25CF    | na     | na      |
| chr18 | 57139259 | 57139593 | 335 Sat25CF   | na     | na      |
| chr18 | 57139517 | 57139870 | 354 Sat25CF   | na     | na      |
| chr18 | 57140568 | 57140610 | 43 Sat25CF    | na     | na      |
| chr18 | 57608800 | 57608878 | 79 Sat94CF    | na     | na      |
| chr18 | 57927175 | 57927208 | 34 Sat56CF    | na     | na      |
| chr18 | 58597350 | 58597393 | 44 Sat46CF    | na     | na      |
| chr18 | 58805798 | 58807585 | 1788 SAT1_CF  | blue   | na      |
| chr18 | 58853261 | 58853689 | 429 SAT1_CF   | blue   | na      |
| chr18 | 58858173 | 58858960 | 788 Sat2CF    | purple | na      |
| chr18 | 58858641 | 58859019 | 379 Sat2CF    | purple | na      |
| chr19 | 3577151  | 3577645  | 495 Sat65CF   | na     | pericen |
| chr19 | 4285599  | 4285658  | 60 Sat69CF    | na     | pericen |
| chr19 | 4398499  | 4398938  | 440 Sat13CF   | na     | pericen |
| chr19 | 5050734  | 5050795  | 62 Sat5CF     | stalk  | na      |
| chr19 | 5947085  | 5947123  | 39 Sat52CF    | na     | na      |
| chr19 | 6197701  | 6199159  | 1459 Sat114CF | na     | na      |
| chr19 | 6874395  | 6874481  | 87 Sat164CF   | na     | na      |
| chr19 | 6972715  | 6972759  | 45 Sat26CF    | na     | na      |
| chr19 | 10879435 | 10880263 | 829 Sat52CF   | na     | na      |
| chr19 | 10879680 | 10880277 | 598 Sat52CF   | na     | na      |
| chr19 | 14924864 | 14924924 | 61 Sat4CF     | lred   | na      |
| chr19 | 15739303 | 15739668 | 366 CarSat1   | red    | na      |
| chr19 | 16800579 | 16800622 | 44 Sat26CF    | na     | na      |
| chr19 | 22324596 | 22324702 | 107 Carsat3   | green  | na      |
| chr19 | 26542660 | 26542787 | 128 Sat37CF   | na     | na      |
| chr19 | 26855850 | 26855900 | 51 Sat38CF    | na     | na      |
| chr19 | 31843478 | 31843699 | 222 Sat17CF   | na     | na      |
| chr19 | 38530554 | 38530611 | 58 Sat27CF    | na     | na      |
| chr19 | 41512190 | 41512237 | 48 Sat35CF    | na     | na      |
| chr19 | 42148352 | 42148611 | 260 Sat94CF   | na     | na      |
| chr19 | 44158108 | 44158165 | 58 Sat33CF    | na     | na      |
| chr19 | 53319043 | 53319962 | 920 Sat106CF  | na     | na      |
| chr19 | 55022194 | 55022242 | 49 Sat18CF    | na     | na      |
| chr2  | 5060246  | 5060371  | 126 Sat42CF   | na     | na      |
| chr2  | 7567404  | 7567660  | 257 Sat15CF   | na     | na      |

|      |          |          |               |        |    |
|------|----------|----------|---------------|--------|----|
| chr2 | 7587487  | 7587848  | 362 Sat15CF   | na     | na |
| chr2 | 9367110  | 9367439  | 330 Sat15CF   | na     | na |
| chr2 | 9367542  | 9367822  | 281 Sat15CF   | na     | na |
| chr2 | 12567322 | 12567405 | 84 Sat17CF    | na     | na |
| chr2 | 12567465 | 12567586 | 122 Sat17CF   | na     | na |
| chr2 | 12904247 | 12904326 | 80 Sat72CF    | na     | na |
| chr2 | 12904251 | 12904320 | 70 Sat72CF    | na     | na |
| chr2 | 17193740 | 17193827 | 88 Sat15CF    | na     | na |
| chr2 | 17194303 | 17194595 | 293 Sat15CF   | na     | na |
| chr2 | 17194949 | 17195555 | 607 Sat15CF   | na     | na |
| chr2 | 17217586 | 17217911 | 326 Sat15CF   | na     | na |
| chr2 | 17219404 | 17219986 | 583 Sat15CF   | na     | na |
| chr2 | 17225858 | 17226229 | 372 Sat15CF   | na     | na |
| chr2 | 18804846 | 18805412 | 567 Sat21CF   | na     | na |
| chr2 | 18804952 | 18805389 | 438 Sat21CF   | na     | na |
| chr2 | 22056588 | 22056717 | 130 Carsat2   | orange | na |
| chr2 | 22883753 | 22884384 | 632 Sat41CF   | na     | na |
| chr2 | 22883819 | 22884433 | 615 Sat83CF   | na     | na |
| chr2 | 24847784 | 24847848 | 65 Sat39CF    | na     | na |
| chr2 | 27754897 | 27755164 | 268 SAT1_CF   | blue   | na |
| chr2 | 28360327 | 28361335 | 1009 Sat135CF | na     | na |
| chr2 | 28360347 | 28360736 | 390 Sat135CF  | na     | na |
| chr2 | 28360437 | 28361491 | 1055 Sat135CF | na     | na |
| chr2 | 31528672 | 31528859 | 188 Sat74CF   | na     | na |
| chr2 | 31598405 | 31598461 | 57 Sat86CF    | na     | na |
| chr2 | 32031905 | 32032482 | 578 Sat94CF   | na     | na |
| chr2 | 32031964 | 32032136 | 173 Sat94CF   | na     | na |
| chr2 | 32032008 | 32032222 | 215 Sat94CF   | na     | na |
| chr2 | 32032123 | 32032491 | 369 Sat94CF   | na     | na |
| chr2 | 32697445 | 32697604 | 160 SAT1_CF   | blue   | na |
| chr2 | 32756137 | 32756193 | 57 Sat27CF    | na     | na |
| chr2 | 33088298 | 33088460 | 163 Sat23CF   | na     | na |
| chr2 | 33960643 | 33960710 | 68 Sat36CF    | na     | na |
| chr2 | 34298767 | 34298823 | 57 Sat67CF    | na     | na |
| chr2 | 34356917 | 34357023 | 107 Carsat3   | green  | na |
| chr2 | 34378160 | 34378395 | 236 Sat39CF   | na     | na |
| chr2 | 35027358 | 35028056 | 699 Sat21CF   | na     | na |
| chr2 | 35589453 | 35589818 | 366 HSATII    | na     | na |
| chr2 | 36408934 | 36409032 | 99 Sat72CF    | na     | na |
| chr2 | 36668888 | 36669025 | 138 Sat5CF    | stalk  | na |
| chr2 | 36740006 | 36740207 | 202 Sat5CF    | stalk  | na |
| chr2 | 37170043 | 37170146 | 104 Sat5CF    | stalk  | na |

|      |          |          |              |        |    |
|------|----------|----------|--------------|--------|----|
| chr2 | 37310865 | 37311052 | 188 Sat176CF | na     | na |
| chr2 | 37515234 | 37515361 | 128 Sat2CF   | purple | na |
| chr2 | 37515245 | 37515300 | 56 Sat2CF    | purple | na |
| chr2 | 37820455 | 37820536 | 82 Sat12CF   | na     | na |
| chr2 | 38743097 | 38743383 | 287 Carsat3  | green  | na |
| chr2 | 38743429 | 38743637 | 209 Carsat3  | green  | na |
| chr2 | 38743753 | 38743884 | 132 Carsat3  | green  | na |
| chr2 | 38744082 | 38744219 | 138 Carsat3  | green  | na |
| chr2 | 39113022 | 39113150 | 129 Carsat3  | green  | na |
| chr2 | 39113571 | 39113708 | 138 Carsat3  | green  | na |
| chr2 | 39113977 | 39114111 | 135 Carsat3  | green  | na |
| chr2 | 39114219 | 39114348 | 130 Carsat3  | green  | na |
| chr2 | 39137368 | 39137708 | 341 CarSat1  | red    | na |
| chr2 | 43484353 | 43484413 | 61 CarSat1   | red    | na |
| chr2 | 50037464 | 50037643 | 180 Carsat3  | green  | na |
| chr2 | 50715784 | 50715840 | 57 Sat32CF   | na     | na |
| chr2 | 52964828 | 52965169 | 342 Sat85CF  | na     | na |
| chr2 | 52964855 | 52965056 | 202 Sat85CF  | na     | na |
| chr2 | 57425570 | 57425993 | 424 Sat19CF  | na     | na |
| chr2 | 58978327 | 58978783 | 457 Sat106CF | na     | na |
| chr2 | 59007031 | 59007292 | 262 Sat43CF  | na     | na |
| chr2 | 59079411 | 59079727 | 317 Sat30CF  | na     | na |
| chr2 | 59079454 | 59079727 | 274 Sat30CF  | na     | na |
| chr2 | 59230559 | 59230622 | 64 Sat50CF   | na     | na |
| chr2 | 59726318 | 59726790 | 473 Sat50CF  | na     | na |
| chr2 | 59726329 | 59726724 | 396 Sat79CF  | na     | na |
| chr2 | 59803830 | 59804352 | 523 Sat52CF  | na     | na |
| chr2 | 59884152 | 59884634 | 483 Sat6CF   | select | na |
| chr2 | 60176622 | 60176753 | 132 Sat123CF | na     | na |
| chr2 | 60273097 | 60273437 | 341 Carsat2  | orange | na |
| chr2 | 60288554 | 60289670 | 1117 SAT1_CF | blue   | na |
| chr2 | 60295105 | 60295284 | 180 Sat2CF   | purple | na |
| chr2 | 60295125 | 60295284 | 160 Sat2CF   | purple | na |
| chr2 | 60471546 | 60471686 | 141 Sat2CF   | purple | na |
| chr2 | 60471627 | 60471704 | 78 Sat2CF    | purple | na |
| chr2 | 60471707 | 60472711 | 1005 SAT1_CF | blue   | na |
| chr2 | 60586155 | 60586496 | 342 Sat2CF   | purple | na |
| chr2 | 60586194 | 60586481 | 288 Sat2CF   | purple | na |
| chr2 | 60606577 | 60606872 | 296 Sat2CF   | purple | na |
| chr2 | 60606600 | 60606797 | 198 Sat2CF   | purple | na |
| chr2 | 60672499 | 60672786 | 288 Sat7CF   | lime   | na |
| chr2 | 60672505 | 60672890 | 386 Sat7CF   | lime   | na |

|      |          |          |      |          |       |    |
|------|----------|----------|------|----------|-------|----|
| chr2 | 60761176 | 60762049 | 874  | Sat7CF   | lime  | na |
| chr2 | 60812884 | 60814534 | 1651 | CarSat1  | red   | na |
| chr2 | 60814829 | 60815224 | 396  | CarSat1  | red   | na |
| chr2 | 60815516 | 60815705 | 190  | CarSat1  | red   | na |
| chr2 | 60815888 | 60816695 | 808  | CarSat1  | red   | na |
| chr2 | 60816892 | 60817217 | 326  | CarSat1  | red   | na |
| chr2 | 60818031 | 60818323 | 293  | CarSat1  | red   | na |
| chr2 | 60818352 | 60819345 | 994  | CarSat1  | red   | na |
| chr2 | 61401180 | 61401218 | 39   | Sat97CF  | na    | na |
| chr2 | 63983939 | 63984013 | 75   | Sat91CF  | na    | na |
| chr2 | 64619081 | 64619115 | 35   | Sat32CF  | na    | na |
| chr2 | 67142776 | 67142833 | 58   | Carsat3  | green | na |
| chr2 | 67830933 | 67831094 | 162  | Sat12CF  | na    | na |
| chr2 | 68758750 | 68758907 | 158  | Sat93CF  | na    | na |
| chr2 | 69148600 | 69148662 | 63   | Sat169CF | na    | na |
| chr2 | 69208364 | 69208552 | 189  | Sat30CF  | na    | na |
| chr2 | 70828903 | 70829421 | 519  | Carsat3  | green | na |
| chr2 | 70829582 | 70829939 | 358  | Carsat3  | green | na |
| chr2 | 71866498 | 71866694 | 197  | Sat12CF  | na    | na |
| chr2 | 71866534 | 71866672 | 139  | Sat12CF  | na    | na |
| chr2 | 72640423 | 72640489 | 67   | Sat51CF  | na    | na |
| chr2 | 72901141 | 72901230 | 90   | Sat132CF | na    | na |
| chr2 | 73138718 | 73138932 | 215  | CarSat1  | red   | na |
| chr2 | 75571102 | 75571220 | 119  | Sat12CF  | na    | na |
| chr2 | 75602161 | 75602232 | 72   | Sat12CF  | na    | na |
| chr2 | 75619867 | 75619936 | 70   | Sat12CF  | na    | na |
| chr2 | 76036300 | 76036359 | 60   | Sat86CF  | na    | na |
| chr2 | 76119475 | 76119619 | 145  | Sat12CF  | na    | na |
| chr2 | 78377054 | 78377871 | 818  | Sat12CF  | na    | na |
| chr2 | 78377535 | 78377910 | 376  | Sat12CF  | na    | na |
| chr2 | 78392543 | 78392612 | 70   | Sat12CF  | na    | na |
| chr2 | 78886317 | 78886414 | 98   | Sat12CF  | na    | na |
| chr2 | 78947384 | 78948366 | 983  | Carsat3  | green | na |
| chr2 | 79026427 | 79026572 | 146  | Carsat3  | green | na |
| chr2 | 79271728 | 79271905 | 178  | Sat17CF  | na    | na |
| chr2 | 79440859 | 79440982 | 124  | Sat12CF  | na    | na |
| chr2 | 80424861 | 80425036 | 176  | Sat13CF  | na    | na |
| chr2 | 81580066 | 81580270 | 205  | Sat41CF  | na    | na |
| chr2 | 82773284 | 82773342 | 59   | Sat21CF  | na    | na |
| chr2 | 82776087 | 82776142 | 56   | Sat18CF  | na    | na |
| chr2 | 82871828 | 82872177 | 350  | Sat12CF  | na    | na |
| chr2 | 83033206 | 83033574 | 369  | Sat83CF  | na    | na |



|       |          |          |              |           |         |
|-------|----------|----------|--------------|-----------|---------|
| chr2  | 83033282 | 83033694 | 413 Sat83CF  | na        | na      |
| chr2  | 83033602 | 83034025 | 424 Sat41CF  | na        | na      |
| chr2  | 83033921 | 83034037 | 117 Sat55CF  | na        | na      |
| chr2  | 83554978 | 83555156 | 179 Sat12CF  | na        | na      |
| chr2  | 83589187 | 83589364 | 178 Sat12CF  | na        | na      |
| chr2  | 83985994 | 83986351 | 358 Sat120CF | na        | na      |
| chr2  | 84524165 | 84524277 | 113 Sat12CF  | na        | na      |
| chr2  | 84524194 | 84524278 | 85 Sat12CF   | na        | na      |
| chr2  | 84839691 | 84839725 | 35 Sat17CF   | na        | na      |
| chr2  | 84839718 | 84839841 | 124 Sat17CF  | na        | na      |
| chr2  | 85310164 | 85310716 | 553 Sat64CF  | na        | na      |
| chr2  | 85900864 | 85901366 | 503 Sat19CF  | na        | na      |
| chr2  | 86461849 | 86461935 | 87 Sat28CF   | na        | na      |
| chr2  | 86506654 | 86506735 | 82 Sat16CF   | na        | na      |
| chr2  | 87495373 | 87495831 | 459 Sat21CF  | na        | na      |
| chr2  | 88392293 | 88392734 | 442 CarSat1  | red       | na      |
| chr20 | 3010613  | 3012045  | 1433 CarSat1 | red       | pericen |
| chr20 | 3027577  | 3028493  | 917 Carsat3  | green     | pericen |
| chr20 | 3047775  | 3049348  | 1574 Carsat3 | green     | pericen |
| chr20 | 3049360  | 3049608  | 249 Carsat3  | green     | pericen |
| chr20 | 3074009  | 3074127  | 119 Carsat3  | green     | pericen |
| chr20 | 3087038  | 3087916  | 879 Carsat3  | green     | pericen |
| chr20 | 3747432  | 3747520  | 89 SUBTEL_sa | na        | pericen |
| chr20 | 4095147  | 4095227  | 81 Sat18CF   | na        | pericen |
| chr20 | 5686355  | 5686450  | 96 Sat62CF   | na        | na      |
| chr20 | 5914346  | 5914401  | 56 Sat185CF  | na        | na      |
| chr20 | 6265128  | 6265167  | 40 Sat5CF    | stalk     | na      |
| chr20 | 6579584  | 6579623  | 40 Sat32CF   | na        | na      |
| chr20 | 7165609  | 7165775  | 167 Carsat3  | green     | na      |
| chr20 | 11632688 | 11633434 | 747 CarSat1  | red       | na      |
| chr20 | 14061927 | 14061983 | 57 Sat128CF  | na        | na      |
| chr20 | 16381027 | 16381079 | 53 Sat56CF   | na        | na      |
| chr20 | 18869404 | 18869470 | 67 Sat19CF   | na        | na      |
| chr20 | 23575206 | 23575265 | 60 Sat71CF   | na        | na      |
| chr20 | 33078451 | 33078594 | 144 CarSat1  | red       | na      |
| chr20 | 37394273 | 37394344 | 72 Sat20CF   | na        | na      |
| chr20 | 42115202 | 42115267 | 66 Sat3CF    | optpurple | na      |
| chr20 | 43778598 | 43779165 | 568 Sat14CF  | na        | na      |
| chr20 | 43779482 | 43779849 | 368 Sat14CF  | na        | na      |
| chr20 | 43779556 | 43779938 | 383 Sat14CF  | na        | na      |
| chr20 | 44902287 | 44902475 | 189 Sat30CF  | na        | na      |
| chr20 | 44936978 | 44937226 | 249 Sat39CF  | na        | na      |

|       |          |          |              |       |    |
|-------|----------|----------|--------------|-------|----|
| chr20 | 45112805 | 45112859 | 55 Sat66CF   | na    | na |
| chr20 | 45356700 | 45356795 | 96 Sat30CF   | na    | na |
| chr20 | 46520808 | 46520838 | 31 Sat27CF   | na    | na |
| chr20 | 46541975 | 46542781 | 807 Carsat3  | green | na |
| chr20 | 46554641 | 46555833 | 1193 Carsat3 | green | na |
| chr20 | 46848473 | 46849002 | 530 Sat30CF  | na    | na |
| chr20 | 46930476 | 46930639 | 164 Sat12CF  | na    | na |
| chr20 | 47754062 | 47754225 | 164 Sat70CF  | na    | na |
| chr20 | 47754084 | 47756019 | 1936 Sat70CF | na    | na |
| chr20 | 47754316 | 47756253 | 1938 Sat70CF | na    | na |
| chr20 | 47754550 | 47756443 | 1894 Sat70CF | na    | na |
| chr20 | 47755018 | 47756645 | 1628 Sat70CF | na    | na |
| chr20 | 47755876 | 47757567 | 1692 Sat70CF | na    | na |
| chr20 | 47757250 | 47757631 | 382 Sat70CF  | na    | na |
| chr20 | 48241551 | 48241645 | 95 Sat130CF  | na    | na |
| chr20 | 48391461 | 48391863 | 403 SAT1_CF  | blue  | na |
| chr20 | 49634556 | 49634909 | 354 Sat41CF  | na    | na |
| chr20 | 49634890 | 49635105 | 216 Sat41CF  | na    | na |
| chr20 | 50985118 | 50985485 | 368 Carsat3  | green | na |
| chr20 | 50985518 | 50986233 | 716 Carsat3  | green | na |
| chr20 | 51308030 | 51308196 | 167 Sat163CF | na    | na |
| chr20 | 51527824 | 51528010 | 187 Sat12CF  | na    | na |
| chr20 | 51864503 | 51864644 | 142 Sat79CF  | na    | na |
| chr20 | 52223534 | 52223721 | 188 Sat55CF  | na    | na |
| chr20 | 52223545 | 52223681 | 137 Sat39CF  | na    | na |
| chr20 | 52475654 | 52477312 | 1659 Carsat3 | green | na |
| chr20 | 52539492 | 52541145 | 1654 Carsat3 | green | na |
| chr20 | 52543171 | 52543334 | 164 Carsat3  | green | na |
| chr20 | 52543506 | 52543766 | 261 Carsat3  | green | na |
| chr20 | 52583054 | 52583144 | 91 Carsat3   | green | na |
| chr20 | 52636132 | 52636270 | 139 Carsat3  | green | na |
| chr20 | 52636337 | 52637139 | 803 Carsat3  | green | na |
| chr20 | 52637237 | 52637877 | 641 Carsat3  | green | na |
| chr20 | 52637984 | 52638119 | 136 Carsat3  | green | na |
| chr20 | 52672674 | 52672798 | 125 Carsat3  | green | na |
| chr20 | 52672859 | 52673093 | 235 Carsat3  | green | na |
| chr20 | 52673190 | 52673438 | 249 Carsat3  | green | na |
| chr20 | 52673619 | 52673769 | 151 Carsat3  | green | na |
| chr20 | 52690978 | 52691505 | 528 Carsat3  | green | na |
| chr20 | 52691679 | 52691742 | 64 Carsat3   | green | na |
| chr20 | 52691846 | 52692128 | 283 Carsat3  | green | na |
| chr20 | 52742215 | 52743713 | 1499 Carsat3 | green | na |

|       |          |          |              |        |    |
|-------|----------|----------|--------------|--------|----|
| chr20 | 52980796 | 52980898 | 103 Sat12CF  | na     | na |
| chr20 | 52980798 | 52980912 | 115 Sat12CF  | na     | na |
| chr20 | 53089496 | 53089814 | 319 Sat12CF  | na     | na |
| chr20 | 53705086 | 53705175 | 90 Sat5CF    | stalk  | na |
| chr20 | 54209408 | 54210055 | 648 Carsat3  | green  | na |
| chr20 | 54210215 | 54210336 | 122 Carsat3  | green  | na |
| chr20 | 54214405 | 54214502 | 98 Carsat3   | green  | na |
| chr20 | 54242484 | 54243346 | 863 Carsat3  | green  | na |
| chr20 | 54244265 | 54244388 | 124 Carsat3  | green  | na |
| chr20 | 54298983 | 54299110 | 128 Carsat3  | green  | na |
| chr20 | 54299242 | 54300284 | 1043 Carsat3 | green  | na |
| chr20 | 54300320 | 54300425 | 106 Carsat3  | green  | na |
| chr20 | 54320168 | 54320966 | 799 Carsat3  | green  | na |
| chr20 | 54321115 | 54321215 | 101 Carsat3  | green  | na |
| chr20 | 54321245 | 54321383 | 139 Carsat3  | green  | na |
| chr20 | 54346220 | 54346421 | 202 Carsat3  | green  | na |
| chr20 | 54346652 | 54347104 | 453 Carsat3  | green  | na |
| chr20 | 54347277 | 54347330 | 54 Carsat3   | green  | na |
| chr20 | 54347773 | 54347900 | 128 Carsat3  | green  | na |
| chr20 | 54373700 | 54375164 | 1465 Carsat3 | green  | na |
| chr20 | 54511302 | 54512526 | 1225 Carsat3 | green  | na |
| chr20 | 54512592 | 54512687 | 96 Carsat3   | green  | na |
| chr20 | 54569587 | 54570138 | 552 Carsat3  | green  | na |
| chr20 | 54570172 | 54570729 | 558 Carsat3  | green  | na |
| chr20 | 54792673 | 54794336 | 1664 Sat32CF | na     | na |
| chr20 | 54792852 | 54800504 | 7653 Sat32CF | na     | na |
| chr20 | 54799019 | 54800737 | 1719 Sat32CF | na     | na |
| chr20 | 54808022 | 54808089 | 68 Sat35CF   | na     | na |
| chr20 | 54915177 | 54915964 | 788 Carsat3  | green  | na |
| chr20 | 54916615 | 54916915 | 301 Carsat3  | green  | na |
| chr20 | 56470244 | 56470295 | 52 Sat8CF    | dgreen | na |
| chr20 | 56652978 | 56653022 | 45 Sat13CF   | na     | na |
| chr20 | 56678415 | 56678515 | 101 Sat55CF  | na     | na |
| chr20 | 56748192 | 56748253 | 62 Sat27CF   | na     | na |
| chr20 | 56974345 | 56974469 | 125 Sat52CF  | na     | na |
| chr20 | 57003760 | 57004040 | 281 Carsat3  | green  | na |
| chr20 | 57004222 | 57004353 | 132 Carsat3  | green  | na |
| chr20 | 57534243 | 57534675 | 433 Sat98CF  | na     | na |
| chr20 | 57534296 | 57534722 | 427 Sat30CF  | na     | na |
| chr20 | 58142641 | 58143737 | 1097 Sat67CF | na     | na |
| chr20 | 58142783 | 58146410 | 3628 Sat67CF | na     | na |
| chr20 | 58145555 | 58146544 | 990 Sat67CF  | na     | na |

|       |          |          |              |       |         |
|-------|----------|----------|--------------|-------|---------|
| chr20 | 58288272 | 58288442 | 171 Sat42CF  | na    | na      |
| chr20 | 58311692 | 58311857 | 166 Sat12CF  | na    | na      |
| chr20 | 58311739 | 58311904 | 166 Sat12CF  | na    | na      |
| chr20 | 58312094 | 58312357 | 264 Sat12CF  | na    | na      |
| chr20 | 58895361 | 58895584 | 224 Sat58CF  | na    | na      |
| chr20 | 58895384 | 58896603 | 1220 Sat58CF | na    | na      |
| chr20 | 58896800 | 58897902 | 1103 Sat58CF | na    | na      |
| chr20 | 58897904 | 58898494 | 591 Sat58CF  | na    | na      |
| chr20 | 59369082 | 59369282 | 201 Carsat3  | green | na      |
| chr20 | 59369464 | 59370853 | 1390 Carsat3 | green | na      |
| chr20 | 59418692 | 59420211 | 1520 Carsat3 | green | na      |
| chr20 | 59424563 | 59424756 | 194 Carsat3  | green | na      |
| chr20 | 59424878 | 59425416 | 539 Carsat3  | green | na      |
| chr20 | 59425694 | 59425788 | 95 Carsat3   | green | na      |
| chr20 | 59460314 | 59460421 | 108 Carsat3  | green | na      |
| chr20 | 59460465 | 59461456 | 992 Carsat3  | green | na      |
| chr20 | 59477057 | 59478242 | 1186 Carsat3 | green | na      |
| chr20 | 59504628 | 59505770 | 1143 Carsat3 | green | na      |
| chr20 | 59505808 | 59506016 | 209 Carsat3  | green | na      |
| chr20 | 59524059 | 59524730 | 672 Carsat3  | green | na      |
| chr20 | 59924255 | 59924605 | 351 CarSat1  | red   | na      |
| chr20 | 60721387 | 60721442 | 56 Sat93CF   | na    | na      |
| chr20 | 60721405 | 60722557 | 1153 Sat93CF | na    | na      |
| chr20 | 60722517 | 60722576 | 60 Sat93CF   | na    | na      |
| chr20 | 60941879 | 60941940 | 62 Sat50CF   | na    | na      |
| chr21 | 3049332  | 3051759  | 2428 SAT1_CF | blue  | pericen |
| chr21 | 3055992  | 3057446  | 1455 CarSat1 | red   | pericen |
| chr21 | 3057733  | 3057975  | 243 CarSat1  | red   | pericen |
| chr21 | 5636472  | 5636563  | 92 Carsat3   | green | na      |
| chr21 | 8738301  | 8738355  | 55 Sat59CF   | na    | na      |
| chr21 | 12562967 | 12563160 | 194 CarSat1  | red   | na      |
| chr21 | 16509402 | 16509445 | 44 Sat91CF   | na    | na      |
| chr21 | 19212344 | 19212772 | 429 Carsat3  | green | na      |
| chr21 | 19366508 | 19366578 | 71 Sat30CF   | na    | na      |
| chr21 | 22695438 | 22695510 | 73 Sat32CF   | na    | na      |
| chr21 | 23192527 | 23192587 | 61 Sat49CF   | na    | na      |
| chr21 | 23259386 | 23259552 | 167 SAT1_CF  | blue  | na      |
| chr21 | 26235725 | 26235891 | 167 Sat12CF  | na    | na      |
| chr21 | 26265564 | 26265902 | 339 Sat12CF  | na    | na      |
| chr21 | 26271773 | 26272053 | 281 Carsat3  | green | na      |
| chr21 | 26345098 | 26345197 | 100 Sat12CF  | na    | na      |
| chr21 | 26365567 | 26365648 | 82 HSATII    | na    | na      |

|       |          |          |              |        |         |
|-------|----------|----------|--------------|--------|---------|
| chr21 | 26365669 | 26365830 | 162 HSATII   | na     | na      |
| chr21 | 27962391 | 27962476 | 86 Sat5CF    | stalk  | na      |
| chr21 | 29935314 | 29935360 | 47 Sat45CF   | na     | na      |
| chr21 | 30239614 | 30240225 | 612 Sat7CF   | lime   | na      |
| chr21 | 32127159 | 32127214 | 56 CarSat1   | red    | na      |
| chr21 | 32537465 | 32537794 | 330 Sat17CF  | na     | na      |
| chr21 | 33868637 | 33869135 | 499 Carsat3  | green  | na      |
| chr21 | 33881688 | 33882481 | 794 Carsat3  | green  | na      |
| chr21 | 33882506 | 33882672 | 167 Carsat3  | green  | na      |
| chr21 | 34127859 | 34128079 | 221 Sat17CF  | na     | na      |
| chr21 | 34989141 | 34989238 | 98 Sat21CF   | na     | na      |
| chr21 | 35117841 | 35117920 | 80 Sat19CF   | na     | na      |
| chr21 | 38915257 | 38916138 | 882 Sat28CF  | na     | na      |
| chr21 | 38915266 | 38915961 | 696 Sat41CF  | na     | na      |
| chr21 | 39317524 | 39317586 | 63 Sat39CF   | na     | na      |
| chr21 | 39318012 | 39318257 | 246 Sat39CF  | na     | na      |
| chr21 | 39318085 | 39318244 | 160 Sat39CF  | na     | na      |
| chr21 | 40006770 | 40006811 | 42 Sat12CF   | na     | na      |
| chr21 | 41377160 | 41377232 | 73 Sat108CF  | na     | na      |
| chr21 | 43121421 | 43121573 | 153 Carsat2  | orange | na      |
| chr21 | 43189990 | 43190140 | 151 Sat12CF  | na     | na      |
| chr21 | 43190021 | 43190165 | 145 Sat12CF  | na     | na      |
| chr21 | 44556987 | 44557039 | 53 Sat4CF    | lred   | na      |
| chr21 | 46491993 | 46492051 | 59 Sat137CF  | na     | na      |
| chr21 | 48338809 | 48339049 | 241 Carsat3  | green  | na      |
| chr21 | 48339312 | 48339467 | 156 Carsat3  | green  | na      |
| chr21 | 51206572 | 51206977 | 406 Sat38CF  | na     | na      |
| chr21 | 52067252 | 52068004 | 753 Sat131CF | na     | na      |
| chr21 | 53446494 | 53446711 | 218 Sat4CF   | lred   | na      |
| chr21 | 53446524 | 53446763 | 240 Sat4CF   | lred   | na      |
| chr22 | 3008788  | 3009787  | 1000 Sat29CF | na     | pericen |
| chr22 | 3008996  | 3009994  | 999 Sat29CF  | na     | pericen |
| chr22 | 3019626  | 3019954  | 329 Sat23CF  | na     | pericen |
| chr22 | 3243165  | 3243262  | 98 Sat21CF   | na     | pericen |
| chr22 | 3786654  | 3787154  | 501 Sat38CF  | na     | pericen |
| chr22 | 4046644  | 4046890  | 247 Sat49CF  | na     | pericen |
| chr22 | 4047635  | 4047805  | 171 Sat4CF   | lred   | pericen |
| chr22 | 4047657  | 4047805  | 149 Sat4CF   | lred   | pericen |
| chr22 | 4202328  | 4202943  | 616 Sat97CF  | na     | pericen |
| chr22 | 4239319  | 4239397  | 79 Sat72CF   | na     | pericen |
| chr22 | 5097819  | 5097979  | 161 Sat19CF  | na     | na      |
| chr22 | 5793449  | 5793899  | 451 Sat131CF | na     | na      |

|       |          |          |              |        |         |
|-------|----------|----------|--------------|--------|---------|
| chr22 | 7806239  | 7806339  | 101 Sat21CF  | na     | na      |
| chr22 | 8675524  | 8676004  | 481 CarSat1  | red    | na      |
| chr22 | 11244780 | 11244838 | 59 Sat122CF  | na     | na      |
| chr22 | 11654256 | 11654319 | 64 Sat33CF   | na     | na      |
| chr22 | 12334656 | 12334727 | 72 Sat14CF   | na     | na      |
| chr22 | 23781389 | 23781580 | 192 Sat17CF  | na     | na      |
| chr22 | 24312480 | 24312527 | 48 Sat108CF  | na     | na      |
| chr22 | 25376898 | 25376931 | 34 Sat138CF  | na     | na      |
| chr22 | 33267830 | 33268142 | 313 SAT1_CF  | blue   | na      |
| chr22 | 33349103 | 33349160 | 58 Sat5CF    | stalk  | na      |
| chr22 | 34021802 | 34021853 | 52 CarSat1   | red    | na      |
| chr22 | 50692578 | 50692644 | 67 Sat91CF   | na     | na      |
| chr22 | 54412042 | 54412274 | 233 Sat65CF  | na     | na      |
| chr22 | 55724098 | 55724236 | 139 Sat17CF  | na     | na      |
| chr22 | 57257904 | 57258090 | 187 Sat17CF  | na     | na      |
| chr22 | 58822532 | 58822588 | 57 Sat26CF   | na     | na      |
| chr22 | 60382390 | 60382452 | 63 Sat36CF   | na     | na      |
| chr22 | 61152503 | 61152581 | 79 Sat46CF   | na     | na      |
| chr22 | 61902136 | 61902307 | 172 Sat72CF  | na     | na      |
| chr22 | 62471944 | 62472013 | 70 Sat73CF   | na     | na      |
| chr22 | 62747230 | 62747676 | 447 Sat160CF | na     | na      |
| chr22 | 63014273 | 63014450 | 178 Sat5CF   | stalk  | na      |
| chr22 | 63225304 | 63225363 | 60 Sat27CF   | na     | na      |
| chr22 | 63354235 | 63354476 | 242 Sat19CF  | na     | na      |
| chr22 | 63376455 | 63376747 | 293 Carsat2  | orange | na      |
| chr22 | 64330527 | 64330988 | 462 Sat100CF | na     | na      |
| chr22 | 64342451 | 64342798 | 348 CarSat1  | red    | na      |
| chr22 | 64385073 | 64386026 | 954 CarSat1  | red    | na      |
| chr22 | 64386049 | 64387433 | 1385 CarSat1 | red    | na      |
| chr22 | 64387646 | 64387750 | 105 CarSat1  | red    | na      |
| chr22 | 64387763 | 64388482 | 720 CarSat1  | red    | na      |
| chr22 | 64388500 | 64389181 | 682 CarSat1  | red    | na      |
| chr22 | 64399050 | 64400528 | 1479 CarSat1 | red    | na      |
| chr22 | 64400555 | 64401118 | 564 CarSat1  | red    | na      |
| chr23 | 3693863  | 3693920  | 58 Sat41CF   | na     | pericen |
| chr23 | 3693869  | 3693917  | 49 Sat41CF   | na     | pericen |
| chr23 | 4819686  | 4820809  | 1124 Carsat3 | green  | pericen |
| chr23 | 4868796  | 4869914  | 1119 Carsat3 | green  | pericen |
| chr23 | 4934643  | 4934984  | 342 Carsat3  | green  | pericen |
| chr23 | 4934997  | 4935434  | 438 Carsat3  | green  | pericen |
| chr23 | 4935513  | 4936028  | 516 Carsat3  | green  | pericen |
| chr23 | 4936140  | 4936317  | 178 Carsat3  | green  | pericen |

|       |          |          |               |        |         |
|-------|----------|----------|---------------|--------|---------|
| chr23 | 5544653  | 5544803  | 151 Sat111CF  | na     | na      |
| chr23 | 5544690  | 5545809  | 1120 Sat111CF | na     | na      |
| chr23 | 5544944  | 5545906  | 963 Sat111CF  | na     | na      |
| chr23 | 5545628  | 5545944  | 317 Sat111CF  | na     | na      |
| chr23 | 6830211  | 6830359  | 149 Sat131CF  | na     | na      |
| chr23 | 6860654  | 6860734  | 81 Sat17CF    | na     | na      |
| chr23 | 6860937  | 6861073  | 137 Sat17CF   | na     | na      |
| chr23 | 8076143  | 8076187  | 45 Sat36CF    | na     | na      |
| chr23 | 8076144  | 8076183  | 40 Sat36CF    | na     | na      |
| chr23 | 8532755  | 8533001  | 247 Carsat3   | green  | na      |
| chr23 | 10647440 | 10647483 | 44 Sat137CF   | na     | na      |
| chr23 | 10810052 | 10810188 | 137 Sat91CF   | na     | na      |
| chr23 | 11998607 | 11998661 | 55 Sat63CF    | na     | na      |
| chr23 | 12940481 | 12941362 | 882 Carsat3   | green  | na      |
| chr23 | 12967438 | 12968108 | 671 Carsat3   | green  | na      |
| chr23 | 12988512 | 12989123 | 612 Carsat3   | green  | na      |
| chr23 | 14636402 | 14637578 | 1177 Sat14CF  | na     | na      |
| chr23 | 14637683 | 14639033 | 1351 Sat14CF  | na     | na      |
| chr23 | 15027323 | 15028008 | 686 Carsat3   | green  | na      |
| chr23 | 15041084 | 15041742 | 659 Carsat3   | green  | na      |
| chr23 | 16664699 | 16664757 | 59 Sat12CF    | na     | na      |
| chr23 | 30372557 | 30372633 | 77 Sat13CF    | na     | na      |
| chr23 | 30557523 | 30557585 | 63 Sat33CF    | na     | na      |
| chr23 | 33859783 | 33859847 | 65 Sat98CF    | na     | na      |
| chr23 | 37620049 | 37620104 | 56 Sat41CF    | na     | na      |
| chr23 | 38114802 | 38114874 | 73 Sat63CF    | na     | na      |
| chr23 | 38535271 | 38535337 | 67 Sat5CF     | stalk  | na      |
| chr23 | 39318710 | 39318779 | 70 Sat103CF   | na     | na      |
| chr23 | 39820805 | 39820885 | 81 Sat2CF     | purple | na      |
| chr23 | 40778296 | 40778343 | 48 Sat77CF    | na     | na      |
| chr23 | 44905298 | 44905362 | 65 Sat108CF   | na     | na      |
| chr23 | 47957726 | 47957808 | 83 Sat17CF    | na     | na      |
| chr23 | 47957852 | 47957971 | 120 Sat17CF   | na     | na      |
| chr23 | 49298764 | 49299948 | 1185 Sat162CF | na     | na      |
| chr23 | 51509691 | 51510869 | 1179 Sat138CF | na     | na      |
| chr23 | 51510914 | 51510948 | 35 Sat138CF   | na     | na      |
| chr23 | 52811095 | 52811142 | 48 Sat76CF    | na     | na      |
| chr23 | 53796567 | 53796668 | 102 SAT1_CF   | blue   | na      |
| chr23 | 53841309 | 53841372 | 64 Sat30CF    | na     | na      |
| chr23 | 54171470 | 54171806 | 337 Sat21CF   | na     | na      |
| chr24 | 3001207  | 3001480  | 274 Sat2CF    | purple | pericen |
| chr24 | 3006114  | 3006905  | 792 SAT1_CF   | blue   | pericen |

|       |          |          |               |        |         |
|-------|----------|----------|---------------|--------|---------|
| chr24 | 3006950  | 3008534  | 1585 SAT1_CF  | blue   | pericen |
| chr24 | 3008546  | 3008668  | 123 SAT1_CF   | blue   | pericen |
| chr24 | 3018416  | 3020235  | 1820 CarSat1  | red    | pericen |
| chr24 | 3020512  | 3021060  | 549 CarSat1   | red    | pericen |
| chr24 | 3021087  | 3022673  | 1587 CarSat1  | red    | pericen |
| chr24 | 3022930  | 3023059  | 130 CarSat1   | red    | pericen |
| chr24 | 3024831  | 3026202  | 1372 CarSat1  | red    | pericen |
| chr24 | 3026264  | 3031196  | 4933 CarSat1  | red    | pericen |
| chr24 | 3031516  | 3032063  | 548 CarSat1   | red    | pericen |
| chr24 | 3035464  | 3037110  | 1647 CarSat1  | red    | pericen |
| chr24 | 3037215  | 3039395  | 2181 CarSat1  | red    | pericen |
| chr24 | 3039441  | 3040029  | 589 Carsat2   | orange | pericen |
| chr24 | 3040220  | 3040665  | 446 Carsat2   | orange | pericen |
| chr24 | 3040250  | 3041119  | 870 CarSat1   | red    | pericen |
| chr24 | 3041121  | 3041557  | 437 Carsat2   | orange | pericen |
| chr24 | 3041731  | 3042595  | 865 Carsat2   | orange | pericen |
| chr24 | 3043059  | 3043092  | 34 Carsat2    | orange | pericen |
| chr24 | 3055047  | 3055952  | 906 Carsat2   | orange | pericen |
| chr24 | 3055971  | 3056571  | 601 Carsat2   | orange | pericen |
| chr24 | 3056993  | 3057071  | 79 Carsat2    | orange | pericen |
| chr24 | 3057488  | 3057936  | 449 Carsat2   | orange | pericen |
| chr24 | 3263206  | 3263302  | 97 Carsat3    | green  | pericen |
| chr24 | 3297319  | 3297471  | 153 Sat125CF  | na     | pericen |
| chr24 | 3297336  | 3298628  | 1293 Sat125CF | na     | pericen |
| chr24 | 3540877  | 3541695  | 819 Sat91CF   | na     | pericen |
| chr24 | 3541559  | 3541695  | 137 Sat91CF   | na     | pericen |
| chr24 | 5072376  | 5072439  | 64 Sat26CF    | na     | na      |
| chr24 | 7153264  | 7153327  | 64 Sat91CF    | na     | na      |
| chr24 | 7816856  | 7817527  | 672 Carsat3   | green  | na      |
| chr24 | 7817615  | 7818091  | 477 Carsat3   | green  | na      |
| chr24 | 8348732  | 8349528  | 797 Sat168CF  | na     | na      |
| chr24 | 8348942  | 8349528  | 587 Sat168CF  | na     | na      |
| chr24 | 9492869  | 9492947  | 79 Sat114CF   | na     | na      |
| chr24 | 14885310 | 14885379 | 70 SUBTEL_sa  | na     | na      |
| chr24 | 18491230 | 18491270 | 41 Sat76CF    | na     | na      |
| chr24 | 21031166 | 21031247 | 82 Sat105CF   | na     | na      |
| chr24 | 21666849 | 21667182 | 334 Carsat3   | green  | na      |
| chr24 | 22119134 | 22119208 | 75 Sat27CF    | na     | na      |
| chr24 | 22678351 | 22678404 | 54 Sat18CF    | na     | na      |
| chr24 | 23181083 | 23181386 | 304 Sat14CF   | na     | na      |
| chr24 | 25370919 | 25370984 | 66 Sat49CF    | na     | na      |
| chr24 | 25974776 | 25974839 | 64 Sat9CF     | na     | na      |



|       |          |          |               |        |    |
|-------|----------|----------|---------------|--------|----|
| chr24 | 27549839 | 27549980 | 142 Sat43CF   | na     | na |
| chr24 | 30553279 | 30553483 | 205 Sat30CF   | na     | na |
| chr24 | 30637844 | 30637912 | 69 Sat26CF    | na     | na |
| chr24 | 31445187 | 31445260 | 74 Sat55CF    | na     | na |
| chr24 | 31636296 | 31636404 | 109 Sat69CF   | na     | na |
| chr24 | 31636309 | 31636415 | 107 Sat69CF   | na     | na |
| chr24 | 32463804 | 32463875 | 72 Sat12CF    | na     | na |
| chr24 | 34163807 | 34163892 | 86 Sat43CF    | na     | na |
| chr24 | 34163901 | 34163935 | 35 Sat72CF    | na     | na |
| chr24 | 35252287 | 35252369 | 83 Carsat2    | orange | na |
| chr24 | 35482404 | 35482472 | 69 Sat14CF    | na     | na |
| chr24 | 36308287 | 36308525 | 239 Sat68CF   | na     | na |
| chr24 | 36660466 | 36661858 | 1393 Carsat3  | green  | na |
| chr24 | 36661871 | 36662119 | 249 Carsat3   | green  | na |
| chr24 | 36709734 | 36709874 | 141 Carsat3   | green  | na |
| chr24 | 36710340 | 36710924 | 585 Carsat3   | green  | na |
| chr24 | 36728732 | 36728816 | 85 Carsat3    | green  | na |
| chr24 | 36728878 | 36729016 | 139 Carsat3   | green  | na |
| chr24 | 36729173 | 36729874 | 702 Carsat3   | green  | na |
| chr24 | 36739890 | 36740026 | 137 Carsat3   | green  | na |
| chr24 | 36740097 | 36740498 | 402 Carsat3   | green  | na |
| chr24 | 36740510 | 36740967 | 458 Carsat3   | green  | na |
| chr24 | 36748533 | 36748666 | 134 Carsat3   | green  | na |
| chr24 | 37943864 | 37944016 | 153 Sat51CF   | na     | na |
| chr24 | 38245056 | 38245207 | 152 Sat51CF   | na     | na |
| chr24 | 41298319 | 41298363 | 45 Sat7CF     | lime   | na |
| chr24 | 44176315 | 44176421 | 107 Sat95CF   | na     | na |
| chr24 | 44176352 | 44176444 | 93 Sat95CF    | na     | na |
| chr24 | 44877484 | 44877526 | 43 Sat98CF    | na     | na |
| chr24 | 45106690 | 45107920 | 1231 Sat52CF  | na     | na |
| chr24 | 45106759 | 45107796 | 1038 Sat160CF | na     | na |
| chr24 | 45486216 | 45486639 | 424 Sat164CF  | na     | na |
| chr24 | 45486261 | 45487619 | 1359 Sat164CF | na     | na |
| chr24 | 45487426 | 45487647 | 222 Sat164CF  | na     | na |
| chr24 | 46228360 | 46228608 | 249 Sat119CF  | na     | na |
| chr24 | 46602107 | 46602336 | 230 Sat79CF   | na     | na |
| chr24 | 47030819 | 47030892 | 74 Sat62CF    | na     | na |
| chr24 | 47851644 | 47851698 | 55 Sat52CF    | na     | na |
| chr24 | 47924281 | 47924359 | 79 Sat2CF     | purple | na |
| chr24 | 48453748 | 48454103 | 356 Sat100CF  | na     | na |
| chr24 | 48579434 | 48579525 | 92 Sat37CF    | na     | na |
| chr24 | 48835792 | 48836041 | 250 Sat5CF    | stalk  | na |

|       |          |          |               |        |         |
|-------|----------|----------|---------------|--------|---------|
| chr24 | 48993784 | 48993859 | 76 Sat34CF    | na     | na      |
| chr24 | 49044940 | 49044984 | 45 Sat5CF     | stalk  | na      |
| chr24 | 49781618 | 49781712 | 95 SUBTEL_sa  | na     | na      |
| chr24 | 50595872 | 50596016 | 145 Sat13CF   | na     | na      |
| chr24 | 50630501 | 50630722 | 222 Sat5CF    | stalk  | na      |
| chr24 | 50760449 | 50761547 | 1099 SAT1_CF  | blue   | na      |
| chr25 | 3065103  | 3065230  | 128 SAT1_CF   | blue   | pericen |
| chr25 | 3075783  | 3075888  | 106 SAT1_CF   | blue   | pericen |
| chr25 | 3075926  | 3077018  | 1093 SAT1_CF  | blue   | pericen |
| chr25 | 3077001  | 3077828  | 828 CarSat1   | red    | pericen |
| chr25 | 3077852  | 3078190  | 339 CarSat1   | red    | pericen |
| chr25 | 3482490  | 3482557  | 68 Sat34CF    | na     | pericen |
| chr25 | 3510067  | 3510200  | 134 Sat17CF   | na     | pericen |
| chr25 | 3510413  | 3510495  | 83 Sat17CF    | na     | pericen |
| chr25 | 6668155  | 6668250  | 96 Sat33CF    | na     | na      |
| chr25 | 6668171  | 6668250  | 80 Sat33CF    | na     | na      |
| chr25 | 7283926  | 7283996  | 71 Carsat3    | green  | na      |
| chr25 | 11726642 | 11726712 | 71 Sat35CF    | na     | na      |
| chr25 | 11764484 | 11764660 | 177 Sat15CF   | na     | na      |
| chr25 | 12087976 | 12088044 | 69 Sat32CF    | na     | na      |
| chr25 | 19387717 | 19387953 | 237 Carsat3   | green  | na      |
| chr25 | 19388838 | 19388900 | 63 Carsat3    | green  | na      |
| chr25 | 22035718 | 22035995 | 278 Carsat2   | orange | na      |
| chr25 | 22063675 | 22064650 | 976 Carsat2   | orange | na      |
| chr25 | 22496048 | 22497049 | 1002 Sat173CF | na     | na      |
| chr25 | 22497013 | 22497071 | 59 Sat173CF   | na     | na      |
| chr25 | 22898842 | 22899506 | 665 Sat15CF   | na     | na      |
| chr25 | 22920629 | 22920885 | 257 Sat15CF   | na     | na      |
| chr25 | 24494843 | 24494983 | 141 Carsat3   | green  | na      |
| chr25 | 26880974 | 26881036 | 63 Sat93CF    | na     | na      |
| chr25 | 27996637 | 27996780 | 144 Carsat3   | green  | na      |
| chr25 | 30423473 | 30423522 | 50 Sat118CF   | na     | na      |
| chr25 | 30506941 | 30507277 | 337 Carsat2   | orange | na      |
| chr25 | 30515004 | 30515427 | 424 Carsat2   | orange | na      |
| chr25 | 30516657 | 30517538 | 882 Sat7CF    | lime   | na      |
| chr25 | 30516769 | 30520015 | 3247 Sat7CF   | lime   | na      |
| chr25 | 30517700 | 30520942 | 3243 Sat7CF   | lime   | na      |
| chr25 | 30518645 | 30521873 | 3229 Sat7CF   | lime   | na      |
| chr25 | 30521415 | 30521949 | 535 Sat7CF    | lime   | na      |
| chr25 | 30552986 | 30553111 | 126 Carsat2   | orange | na      |
| chr25 | 31248890 | 31248955 | 66 Sat86CF    | na     | na      |
| chr25 | 37157571 | 37157619 | 49 Sat103CF   | na     | na      |

|       |          |          |               |           |         |
|-------|----------|----------|---------------|-----------|---------|
| chr25 | 37291341 | 37291580 | 240 Sat171CF  | na        | na      |
| chr25 | 37291591 | 37291679 | 89 Sat171CF   | na        | na      |
| chr25 | 38072481 | 38072582 | 102 Sat13CF   | na        | na      |
| chr25 | 39460279 | 39460555 | 277 Carsat2   | orange    | na      |
| chr25 | 39691322 | 39691379 | 58 Sat76CF    | na        | na      |
| chr25 | 40179497 | 40179598 | 102 CarSat1   | red       | na      |
| chr25 | 40180270 | 40180524 | 255 Carsat2   | orange    | na      |
| chr25 | 40180689 | 40181090 | 402 Carsat2   | orange    | na      |
| chr25 | 40181503 | 40181827 | 325 Carsat2   | orange    | na      |
| chr25 | 40181859 | 40182277 | 419 Carsat2   | orange    | na      |
| chr25 | 40182950 | 40183110 | 161 Carsat2   | orange    | na      |
| chr25 | 40186192 | 40187177 | 986 Carsat2   | orange    | na      |
| chr25 | 40199876 | 40200139 | 264 SAT1_CF   | blue      | na      |
| chr25 | 40200216 | 40200368 | 153 SAT1_CF   | blue      | na      |
| chr25 | 40200455 | 40200692 | 238 SAT1_CF   | blue      | na      |
| chr25 | 40253080 | 40254081 | 1002 Carsat3  | green     | na      |
| chr25 | 40284438 | 40285585 | 1148 Carsat3  | green     | na      |
| chr25 | 41622570 | 41623674 | 1105 Sat102CF | na        | na      |
| chr25 | 41670706 | 41671864 | 1159 Sat128CF | na        | na      |
| chr25 | 42991775 | 42991812 | 38 Sat66CF    | na        | na      |
| chr25 | 45885727 | 45885788 | 62 Sat136CF   | na        | na      |
| chr25 | 48688161 | 48688364 | 204 Sat79CF   | na        | na      |
| chr25 | 49966351 | 49967763 | 1413 Sat84CF  | na        | na      |
| chr25 | 49967584 | 49967794 | 211 Sat84CF   | na        | na      |
| chr25 | 51095479 | 51095742 | 264 HSATII    | na        | na      |
| chr25 | 51179615 | 51180173 | 559 Sat153CF  | na        | na      |
| chr25 | 51400731 | 51401319 | 589 Sat131CF  | na        | na      |
| chr25 | 51653497 | 51653917 | 421 Sat81CF   | na        | na      |
| chr25 | 51780765 | 51781032 | 268 Sat3CF    | optpurple | na      |
| chr25 | 51801522 | 51802419 | 898 Sat79CF   | na        | na      |
| chr25 | 52243677 | 52243898 | 222 Sat74CF   | na        | na      |
| chr25 | 52775966 | 52776172 | 207 Sat83CF   | na        | na      |
| chr25 | 53335892 | 53336515 | 624 Sat19CF   | na        | na      |
| chr25 | 53844415 | 53844969 | 555 Sat14CF   | na        | na      |
| chr25 | 53844421 | 53844831 | 411 Sat14CF   | na        | na      |
| chr25 | 53844468 | 53845105 | 638 Sat14CF   | na        | na      |
| chr25 | 53844517 | 53845027 | 511 Sat14CF   | na        | na      |
| chr25 | 54358967 | 54359991 | 1025 Sat51CF  | na        | na      |
| chr26 | 3046079  | 3048228  | 2150 Carsat3  | green     | pericen |
| chr26 | 3091013  | 3092028  | 1016 Carsat3  | green     | pericen |
| chr26 | 3118876  | 3119628  | 753 Carsat3   | green     | pericen |
| chr26 | 3137254  | 3138196  | 943 Carsat3   | green     | pericen |

|       |          |          |      |           |        |         |
|-------|----------|----------|------|-----------|--------|---------|
| chr26 | 3176516  | 3176666  | 151  | Carsat3   | green  | pericen |
| chr26 | 3176970  | 3178710  | 1741 | Carsat3   | green  | pericen |
| chr26 | 3213132  | 3214286  | 1155 | Carsat3   | green  | pericen |
| chr26 | 3235739  | 3235839  | 101  | Carsat3   | green  | pericen |
| chr26 | 3257726  | 3259296  | 1571 | Carsat3   | green  | pericen |
| chr26 | 3259368  | 3259501  | 134  | Carsat3   | green  | pericen |
| chr26 | 3275165  | 3275297  | 133  | Carsat3   | green  | pericen |
| chr26 | 3275339  | 3276116  | 778  | Carsat3   | green  | pericen |
| chr26 | 3535292  | 3535538  | 247  | Sat69CF   | na     | pericen |
| chr26 | 3956757  | 3957057  | 301  | Sat16CF   | na     | pericen |
| chr26 | 4551988  | 4552218  | 231  | Sat84CF   | na     | pericen |
| chr26 | 4728525  | 4728585  | 61   | Sat26CF   | na     | pericen |
| chr26 | 4756707  | 4757232  | 526  | Sat98CF   | na     | pericen |
| chr26 | 4759039  | 4759789  | 751  | Sat30CF   | na     | pericen |
| chr26 | 4760906  | 4761437  | 532  | Sat98CF   | na     | pericen |
| chr26 | 4796553  | 4797079  | 527  | Sat144CF  | na     | pericen |
| chr26 | 4797537  | 4797936  | 400  | Sat144CF  | na     | pericen |
| chr26 | 5169593  | 5170721  | 1129 | Sat91CF   | na     | na      |
| chr26 | 5918497  | 5918631  | 135  | Sat5CF    | stalk  | na      |
| chr26 | 6683936  | 6684047  | 112  | Sat31CF   | na     | na      |
| chr26 | 8018521  | 8019644  | 1124 | Sat17CF   | na     | na      |
| chr26 | 8718892  | 8719634  | 743  | Carsat3   | green  | na      |
| chr26 | 9500269  | 9500326  | 58   | Sat33CF   | na     | na      |
| chr26 | 10032363 | 10032810 | 448  | Carsat3   | green  | na      |
| chr26 | 12717997 | 12718050 | 54   | Sat91CF   | na     | na      |
| chr26 | 13797178 | 13797301 | 124  | Sat13CF   | na     | na      |
| chr26 | 16264880 | 16265266 | 387  | Sat28CF   | na     | na      |
| chr26 | 16323123 | 16323184 | 62   | Sat27CF   | na     | na      |
| chr26 | 16368961 | 16369005 | 45   | Sat10CF   | na     | na      |
| chr26 | 20093985 | 20094238 | 254  | Carsat3   | green  | na      |
| chr26 | 20902939 | 20903002 | 64   | Sat21CF   | na     | na      |
| chr26 | 24483851 | 24483911 | 61   | Sat12CF   | na     | na      |
| chr26 | 25757433 | 25757474 | 42   | SUBTEL_sa | na     | na      |
| chr26 | 25762684 | 25762870 | 187  | Sat130CF  | na     | na      |
| chr26 | 25762884 | 25763928 | 1045 | Sat130CF  | na     | na      |
| chr26 | 27410471 | 27410525 | 55   | Sat181CF  | na     | na      |
| chr26 | 28147812 | 28147854 | 43   | CarSat1   | red    | na      |
| chr26 | 28335474 | 28335516 | 43   | CarSat1   | red    | na      |
| chr26 | 28591893 | 28591935 | 43   | CarSat1   | red    | na      |
| chr26 | 29154715 | 29154757 | 43   | CarSat1   | red    | na      |
| chr26 | 29501067 | 29501535 | 469  | Carsat2   | orange | na      |
| chr26 | 29501552 | 29501690 | 139  | Carsat2   | orange | na      |

|       |          |          |      |           |        |         |
|-------|----------|----------|------|-----------|--------|---------|
| chr26 | 29502044 | 29502121 | 78   | Carsat2   | orange | na      |
| chr26 | 31822132 | 31823204 | 1073 | Carsat3   | green  | na      |
| chr26 | 31991160 | 31991213 | 54   | Sat105CF  | na     | na      |
| chr26 | 32673255 | 32673307 | 53   | Sat4CF    | lred   | na      |
| chr26 | 33258688 | 33258807 | 120  | Carsat3   | green  | na      |
| chr26 | 33258843 | 33259866 | 1024 | Carsat3   | green  | na      |
| chr26 | 33259888 | 33260022 | 135  | Carsat3   | green  | na      |
| chr26 | 33280137 | 33281057 | 921  | Carsat3   | green  | na      |
| chr26 | 36170267 | 36170414 | 148  | CarSat1   | red    | na      |
| chr26 | 36171925 | 36172017 | 93   | Sat52CF   | na     | na      |
| chr26 | 38446692 | 38446766 | 75   | Sat130CF  | na     | na      |
| chr26 | 38656299 | 38657297 | 999  | Sat182CF  | na     | na      |
| chr26 | 38776171 | 38776337 | 167  | SUBTEL_sa | na     | na      |
| chr26 | 39054535 | 39054638 | 104  | Carsat3   | green  | na      |
| chr26 | 40476838 | 40476952 | 115  | Sat49CF   | na     | na      |
| chr26 | 41672055 | 41672602 | 548  | Sat111CF  | na     | na      |
| chr26 | 41830629 | 41831239 | 611  | Sat50CF   | na     | na      |
| chr26 | 41834634 | 41834705 | 72   | Sat19CF   | na     | na      |
| chr26 | 41871670 | 41872705 | 1036 | Sat106CF  | na     | na      |
| chr26 | 42026963 | 42027140 | 178  | SAT1_CF   | blue   | na      |
| chr26 | 42027183 | 42028033 | 851  | SAT1_CF   | blue   | na      |
| chr27 | 3215016  | 3215264  | 249  | Carsat2   | orange | pericen |
| chr27 | 3215442  | 3215601  | 160  | Carsat2   | orange | pericen |
| chr27 | 6187799  | 6187845  | 47   | Sat63CF   | na     | na      |
| chr27 | 7537239  | 7537286  | 48   | Sat118CF  | na     | na      |
| chr27 | 8293948  | 8294059  | 112  | Sat65CF   | na     | na      |
| chr27 | 10277856 | 10278075 | 220  | Carsat3   | green  | na      |
| chr27 | 11058308 | 11058716 | 409  | CarSat1   | red    | na      |
| chr27 | 12462120 | 12462148 | 29   | Sat57CF   | na     | na      |
| chr27 | 18588382 | 18588483 | 102  | Sat26CF   | na     | na      |
| chr27 | 18588420 | 18588483 | 64   | Sat26CF   | na     | na      |
| chr27 | 21899216 | 21899284 | 69   | Sat137CF  | na     | na      |
| chr27 | 31612542 | 31612846 | 305  | Carsat3   | green  | na      |
| chr27 | 31613265 | 31613803 | 539  | Carsat3   | green  | na      |
| chr27 | 38440353 | 38441071 | 719  | Sat7CF    | lime   | na      |
| chr27 | 42992616 | 42992670 | 55   | Sat100CF  | na     | na      |
| chr27 | 44612256 | 44612542 | 287  | Sat153CF  | na     | na      |
| chr27 | 45701433 | 45701482 | 50   | Sat147CF  | na     | na      |
| chr27 | 46600165 | 46600237 | 73   | Sat79CF   | na     | na      |
| chr27 | 48859528 | 48859884 | 357  | CarSat1   | red    | na      |
| chr27 | 48862716 | 48863263 | 548  | CarSat1   | red    | na      |
| chr27 | 48863271 | 48867067 | 3797 | SAT1_CF   | blue   | na      |

|       |          |          |               |        |         |
|-------|----------|----------|---------------|--------|---------|
| chr27 | 48872167 | 48872786 | 620 Sat2CF    | purple | na      |
| chr27 | 48890876 | 48893547 | 2672 SAT1_CF  | blue   | na      |
| chr27 | 48893581 | 48893756 | 176 SAT1_CF   | blue   | na      |
| chr27 | 48893758 | 48894996 | 1239 CarSat1  | red    | na      |
| chr27 | 48895017 | 48895624 | 608 CarSat1   | red    | na      |
| chr27 | 48895644 | 48895710 | 67 CarSat1    | red    | na      |
| chr27 | 48895731 | 48897266 | 1536 CarSat1  | red    | na      |
| chr27 | 48897284 | 48897856 | 573 CarSat1   | red    | na      |
| chr27 | 48898094 | 48898994 | 901 CarSat1   | red    | na      |
| chr27 | 48899015 | 48899864 | 850 CarSat1   | red    | na      |
| chr27 | 48899887 | 48901335 | 1449 CarSat1  | red    | na      |
| chr27 | 48901496 | 48903179 | 1684 CarSat1  | red    | na      |
| chr27 | 48903200 | 48904051 | 852 CarSat1   | red    | na      |
| chr27 | 48904134 | 48905029 | 896 CarSat1   | red    | na      |
| chr28 | 3003157  | 3004108  | 952 CarSat1   | red    | pericen |
| chr28 | 3004135  | 3004974  | 840 CarSat1   | red    | pericen |
| chr28 | 3005142  | 3005846  | 705 CarSat1   | red    | pericen |
| chr28 | 3005867  | 3006721  | 855 CarSat1   | red    | pericen |
| chr28 | 3006871  | 3008334  | 1464 CarSat1  | red    | pericen |
| chr28 | 3008355  | 3009947  | 1593 CarSat1  | red    | pericen |
| chr28 | 3010107  | 3010749  | 643 CarSat1   | red    | pericen |
| chr28 | 3010784  | 3011562  | 779 CarSat1   | red    | pericen |
| chr28 | 3011585  | 3013056  | 1472 CarSat1  | red    | pericen |
| chr28 | 3018978  | 3019904  | 927 CarSat1   | red    | pericen |
| chr28 | 3019925  | 3020967  | 1043 CarSat1  | red    | pericen |
| chr28 | 3020984  | 3022248  | 1265 CarSat1  | red    | pericen |
| chr28 | 3022269  | 3023312  | 1044 CarSat1  | red    | pericen |
| chr28 | 3048327  | 3048839  | 513 Sat8CF    | dgreen | pericen |
| chr28 | 3050321  | 3050823  | 503 Sat8CF    | dgreen | pericen |
| chr28 | 5442475  | 5442910  | 436 Carsat3   | green  | na      |
| chr28 | 6486826  | 6487393  | 568 Carsat3   | green  | na      |
| chr28 | 6499758  | 6500734  | 977 Carsat3   | green  | na      |
| chr28 | 6538508  | 6538745  | 238 Carsat3   | green  | na      |
| chr28 | 6538760  | 6539191  | 432 Carsat3   | green  | na      |
| chr28 | 6594284  | 6595029  | 746 Carsat3   | green  | na      |
| chr28 | 6595212  | 6595332  | 121 Carsat3   | green  | na      |
| chr28 | 6595375  | 6595669  | 295 Carsat3   | green  | na      |
| chr28 | 7182309  | 7182677  | 369 Carsat3   | green  | na      |
| chr28 | 7260897  | 7260989  | 93 Carsat3    | green  | na      |
| chr28 | 7261042  | 7262418  | 1377 Carsat3  | green  | na      |
| chr28 | 9069451  | 9069494  | 44 Sat66CF    | na     | na      |
| chr28 | 11080470 | 11081555 | 1086 Sat155CF | na     | na      |

|       |          |          |               |       |         |
|-------|----------|----------|---------------|-------|---------|
| chr28 | 12413860 | 12413903 | 44 Sat104CF   | na    | na      |
| chr28 | 13922763 | 13922817 | 55 Sat5CF     | stalk | na      |
| chr28 | 18826495 | 18826613 | 119 Sat12CF   | na    | na      |
| chr28 | 30229964 | 30230009 | 46 Sat35CF    | na    | na      |
| chr28 | 30428376 | 30428451 | 76 Sat65CF    | na    | na      |
| chr28 | 30746132 | 30746178 | 47 Sat13CF    | na    | na      |
| chr28 | 32522776 | 32522897 | 122 Sat5CF    | stalk | na      |
| chr28 | 34200964 | 34201034 | 71 Sat9CF     | na    | na      |
| chr28 | 35163778 | 35163837 | 60 Sat92CF    | na    | na      |
| chr28 | 35900715 | 35900890 | 176 Sat5CF    | stalk | na      |
| chr28 | 39533777 | 39534531 | 755 Sat45CF   | na    | na      |
| chr28 | 39533919 | 39534221 | 303 Sat45CF   | na    | na      |
| chr28 | 39534042 | 39534335 | 294 Sat45CF   | na    | na      |
| chr28 | 39842362 | 39842588 | 227 Sat30CF   | na    | na      |
| chr28 | 39913610 | 39914444 | 835 Sat105CF  | na    | na      |
| chr28 | 39913774 | 39914810 | 1037 Sat105CF | na    | na      |
| chr28 | 39915082 | 39915826 | 745 Sat105CF  | na    | na      |
| chr28 | 39915180 | 39916192 | 1013 Sat105CF | na    | na      |
| chr28 | 39915525 | 39916552 | 1028 Sat105CF | na    | na      |
| chr28 | 39916626 | 39917659 | 1034 Sat105CF | na    | na      |
| chr28 | 39916989 | 39918025 | 1037 Sat105CF | na    | na      |
| chr28 | 39917355 | 39918315 | 961 Sat105CF  | na    | na      |
| chr28 | 40437465 | 40437881 | 417 Sat30CF   | na    | na      |
| chr28 | 40439882 | 40440748 | 867 Sat44CF   | na    | na      |
| chr28 | 40463621 | 40463697 | 77 Sat13CF    | na    | na      |
| chr28 | 41348631 | 41348723 | 93 Sat63CF    | na    | na      |
| chr28 | 42238407 | 42238478 | 72 Sat172CF   | na    | na      |
| chr28 | 42263857 | 42264276 | 420 Sat47CF   | na    | na      |
| chr28 | 42678638 | 42678710 | 73 Sat19CF    | na    | na      |
| chr28 | 42853712 | 42854139 | 428 Sat21CF   | na    | na      |
| chr28 | 42898675 | 42898746 | 72 Sat123CF   | na    | na      |
| chr28 | 42903269 | 42903322 | 54 Sat151CF   | na    | na      |
| chr28 | 43103032 | 43103429 | 398 Sat19CF   | na    | na      |
| chr28 | 43293749 | 43293779 | 31 Sat5CF     | stalk | na      |
| chr28 | 43730895 | 43731175 | 281 Sat14CF   | na    | na      |
| chr28 | 43730924 | 43731633 | 710 Sat14CF   | na    | na      |
| chr28 | 43831744 | 43832239 | 496 Sat28CF   | na    | na      |
| chr28 | 43840670 | 43840899 | 230 Sat43CF   | na    | na      |
| chr28 | 44035424 | 44035598 | 175 CarSat1   | red   | na      |
| chr28 | 44154254 | 44155251 | 998 Carsat3   | green | na      |
| chr28 | 44188133 | 44188960 | 828 SAT1_CF   | blue  | na      |
| chr29 | 3009011  | 3012952  | 3942 CarSat1  | red   | pericen |

|       |          |          |      |           |       |         |
|-------|----------|----------|------|-----------|-------|---------|
| chr29 | 3012968  | 3014260  | 1293 | CarSat1   | red   | pericen |
| chr29 | 3014619  | 3017179  | 2561 | CarSat1   | red   | pericen |
| chr29 | 3538260  | 3538342  | 83   | Sat49CF   | na    | pericen |
| chr29 | 3720115  | 3720173  | 59   | Sat60CF   | na    | pericen |
| chr29 | 4455905  | 4456011  | 107  | Sat146CF  | na    | pericen |
| chr29 | 4455916  | 4457330  | 1415 | Sat146CF  | na    | pericen |
| chr29 | 9208078  | 9208169  | 92   | Carsat3   | green | na      |
| chr29 | 9490110  | 9490167  | 58   | Sat25CF   | na    | na      |
| chr29 | 15053696 | 15053847 | 152  | Carsat3   | green | na      |
| chr29 | 24741699 | 24741891 | 193  | Sat17CF   | na    | na      |
| chr29 | 27321614 | 27321881 | 268  | SAT1_CF   | blue  | na      |
| chr29 | 30526123 | 30526182 | 60   | SUBTEL_sa | na    | na      |
| chr29 | 30947436 | 30948362 | 927  | Sat53CF   | na    | na      |
| chr29 | 32846262 | 32846528 | 267  | Carsat3   | green | na      |
| chr29 | 34679810 | 34680284 | 475  | Sat38CF   | na    | na      |
| chr29 | 34730015 | 34730167 | 153  | Sat129CF  | na    | na      |
| chr29 | 36766753 | 36766835 | 83   | Carsat3   | green | na      |
| chr29 | 36767005 | 36767280 | 276  | Carsat3   | green | na      |
| chr29 | 36767548 | 36767784 | 237  | Carsat3   | green | na      |
| chr29 | 36767808 | 36767894 | 87   | Carsat3   | green | na      |
| chr29 | 38463014 | 38463695 | 682  | Sat55CF   | na    | na      |
| chr29 | 38482078 | 38483418 | 1341 | Sat102CF  | na    | na      |
| chr29 | 38485564 | 38485663 | 100  | Sat24CF   | na    | na      |
| chr29 | 38485664 | 38486724 | 1061 | Sat24CF   | na    | na      |
| chr29 | 39107247 | 39107505 | 259  | Sat14CF   | na    | na      |
| chr29 | 39107392 | 39107533 | 142  | Sat14CF   | na    | na      |
| chr29 | 39495244 | 39495312 | 69   | Sat33CF   | na    | na      |
| chr29 | 41585207 | 41585349 | 143  | SUBTEL_sa | na    | na      |
| chr29 | 41585529 | 41585671 | 143  | SUBTEL_sa | na    | na      |
| chr29 | 41964980 | 41965176 | 197  | Sat38CF   | na    | na      |
| chr29 | 42679866 | 42680323 | 458  | Sat132CF  | na    | na      |
| chr29 | 42867525 | 42867715 | 191  | Sat37CF   | na    | na      |
| chr29 | 43110730 | 43112098 | 1369 | Sat83CF   | na    | na      |
| chr29 | 43170929 | 43171354 | 426  | Sat83CF   | na    | na      |
| chr29 | 43810781 | 43812299 | 1519 | Sat127CF  | na    | na      |
| chr29 | 43811023 | 43812709 | 1687 | Sat127CF  | na    | na      |
| chr29 | 43812374 | 43813154 | 781  | Sat127CF  | na    | na      |
| chr29 | 43813222 | 43813351 | 130  | Sat5CF    | stalk | na      |
| chr29 | 43813251 | 43813415 | 165  | Sat5CF    | stalk | na      |
| chr29 | 43846246 | 43846310 | 65   | Sat63CF   | na    | na      |
| chr29 | 43969567 | 43969634 | 68   | Sat53CF   | na    | na      |
| chr29 | 44135350 | 44135470 | 121  | Sat29CF   | na    | na      |



|       |          |          |               |           |         |
|-------|----------|----------|---------------|-----------|---------|
| chr29 | 44188767 | 44189536 | 770 Sat97CF   | na        | na      |
| chr29 | 44268615 | 44268926 | 312 Sat104CF  | na        | na      |
| chr29 | 44729110 | 44729462 | 353 Carsat2   | orange    | na      |
| chr3  | 3018973  | 3020080  | 1108 Sat2CF   | purple    | pericen |
| chr3  | 3022549  | 3022684  | 136 CarSat1   | red       | pericen |
| chr3  | 3022711  | 3024249  | 1539 CarSat1  | red       | pericen |
| chr3  | 3033061  | 3033772  | 712 CarSat1   | red       | pericen |
| chr3  | 3033966  | 3034109  | 144 CarSat1   | red       | pericen |
| chr3  | 3034143  | 3035333  | 1191 CarSat1  | red       | pericen |
| chr3  | 3035350  | 3037502  | 2153 CarSat1  | red       | pericen |
| chr3  | 3042246  | 3042675  | 430 SAT1_CF   | blue      | pericen |
| chr3  | 3047248  | 3048561  | 1314 Sat2CF   | purple    | pericen |
| chr3  | 3047428  | 3048688  | 1261 Sat2CF   | purple    | pericen |
| chr3  | 3075766  | 3075833  | 68 Sat49CF    | na        | pericen |
| chr3  | 6205762  | 6206765  | 1004 Sat176CF | na        | na      |
| chr3  | 6473525  | 6473767  | 243 Sat18CF   | na        | na      |
| chr3  | 6473554  | 6473766  | 213 Sat18CF   | na        | na      |
| chr3  | 6999576  | 6999696  | 121 Sat129CF  | na        | na      |
| chr3  | 12591556 | 12591654 | 99 Carsat3    | green     | na      |
| chr3  | 14642111 | 14642165 | 55 Sat155CF   | na        | na      |
| chr3  | 18601397 | 18601567 | 171 SAT1_CF   | blue      | na      |
| chr3  | 26792742 | 26792822 | 81 Sat35CF    | na        | na      |
| chr3  | 26926610 | 26926657 | 48 Sat76CF    | na        | na      |
| chr3  | 30796815 | 30796912 | 98 Sat36CF    | na        | na      |
| chr3  | 31719581 | 31719640 | 60 Sat3CF     | optpurple | na      |
| chr3  | 31719809 | 31719850 | 42 Sat3CF     | optpurple | na      |
| chr3  | 31720807 | 31720832 | 26 Sat3CF     | optpurple | na      |
| chr3  | 33636496 | 33636829 | 334 Sat125CF  | na        | na      |
| chr3  | 34130791 | 34132204 | 1414 CarSat1  | red       | na      |
| chr3  | 34132225 | 34132367 | 143 CarSat1   | red       | na      |
| chr3  | 34132397 | 34132512 | 116 CarSat1   | red       | na      |
| chr3  | 34132549 | 34132691 | 143 CarSat1   | red       | na      |
| chr3  | 34132760 | 34133028 | 269 CarSat1   | red       | na      |
| chr3  | 34133058 | 34133199 | 142 CarSat1   | red       | na      |
| chr3  | 34133220 | 34133936 | 717 CarSat1   | red       | na      |
| chr3  | 34146228 | 34146915 | 688 Sat2CF    | purple    | na      |
| chr3  | 34146302 | 34146954 | 653 Sat2CF    | purple    | na      |
| chr3  | 34846637 | 34846691 | 55 SUBTEL_sa  | na        | na      |
| chr3  | 39228539 | 39228609 | 71 Sat180CF   | na        | na      |
| chr3  | 39589764 | 39590085 | 322 Carsat3   | green     | na      |
| chr3  | 40048173 | 40048885 | 713 Sat9CF    | na        | na      |
| chr3  | 40048409 | 40048887 | 479 Sat9CF    | na        | na      |

|      |          |          |               |        |    |
|------|----------|----------|---------------|--------|----|
| chr3 | 40105859 | 40106218 | 360 Carsat3   | green  | na |
| chr3 | 40386857 | 40386931 | 75 Sat18CF    | na     | na |
| chr3 | 40386883 | 40386931 | 49 Sat18CF    | na     | na |
| chr3 | 40707722 | 40707814 | 93 Sat36CF    | na     | na |
| chr3 | 40707727 | 40707804 | 78 Sat36CF    | na     | na |
| chr3 | 47307319 | 47307380 | 62 Sat77CF    | na     | na |
| chr3 | 50857358 | 50857395 | 38 Sat113CF   | na     | na |
| chr3 | 51386211 | 51386260 | 50 Sat80CF    | na     | na |
| chr3 | 52934181 | 52935182 | 1002 Sat183CF | na     | na |
| chr3 | 53243589 | 53243675 | 87 Sat14CF    | na     | na |
| chr3 | 54875732 | 54875774 | 43 Sat88CF    | na     | na |
| chr3 | 54875753 | 54876992 | 1240 Sat88CF  | na     | na |
| chr3 | 54875929 | 54877148 | 1220 Sat88CF  | na     | na |
| chr3 | 54877149 | 54877359 | 211 Sat88CF   | na     | na |
| chr3 | 54878004 | 54878085 | 82 Sat88CF    | na     | na |
| chr3 | 55494669 | 55494837 | 169 Sat19CF   | na     | na |
| chr3 | 56683258 | 56683506 | 249 Carsat3   | green  | na |
| chr3 | 56683681 | 56684169 | 489 Carsat3   | green  | na |
| chr3 | 56743645 | 56744857 | 1213 Carsat3  | green  | na |
| chr3 | 56763106 | 56763883 | 778 Carsat3   | green  | na |
| chr3 | 58693172 | 58694267 | 1096 Sat156CF | na     | na |
| chr3 | 58693320 | 58694809 | 1490 Sat156CF | na     | na |
| chr3 | 59442531 | 59442582 | 52 Sat118CF   | na     | na |
| chr3 | 59578252 | 59578292 | 41 Sat27CF    | na     | na |
| chr3 | 59753195 | 59753247 | 53 Sat145CF   | na     | na |
| chr3 | 59797365 | 59797428 | 64 Sat86CF    | na     | na |
| chr3 | 60418107 | 60418394 | 288 Sat28CF   | na     | na |
| chr3 | 60735019 | 60735066 | 48 Sat109CF   | na     | na |
| chr3 | 60839118 | 60839559 | 442 Sat60CF   | na     | na |
| chr3 | 61072980 | 61073115 | 136 Sat21CF   | na     | na |
| chr3 | 62838696 | 62838918 | 223 Sat84CF   | na     | na |
| chr3 | 62863471 | 62863666 | 196 Sat80CF   | na     | na |
| chr3 | 63012838 | 63012890 | 53 Sat22CF    | na     | na |
| chr3 | 63149974 | 63150124 | 151 Sat30CF   | na     | na |
| chr3 | 63217235 | 63217373 | 139 Sat16CF   | na     | na |
| chr3 | 63262324 | 63262730 | 407 Sat47CF   | na     | na |
| chr3 | 63262485 | 63262765 | 281 Sat114CF  | na     | na |
| chr3 | 63262964 | 63263480 | 517 Sat47CF   | na     | na |
| chr3 | 63335723 | 63335907 | 185 Sat2CF    | purple | na |
| chr3 | 63836790 | 63837153 | 364 Sat21CF   | na     | na |
| chr3 | 64919132 | 64919424 | 293 Sat30CF   | na     | na |
| chr3 | 64919182 | 64919466 | 285 Sat30CF   | na     | na |

|       |          |          |               |       |    |
|-------|----------|----------|---------------|-------|----|
| chr3  | 65288685 | 65288787 | 103 Sat13CF   | na    | na |
| chr3  | 65331453 | 65331719 | 267 Sat131CF  | na    | na |
| chr3  | 65339612 | 65339785 | 174 Sat52CF   | na    | na |
| chr3  | 65344724 | 65345123 | 400 Sat5CF    | stalk | na |
| chr3  | 66706286 | 66706342 | 57 Sat36CF    | na    | na |
| chr3  | 66744284 | 66744372 | 89 Carsat3    | green | na |
| chr3  | 67207303 | 67207514 | 212 Sat95CF   | na    | na |
| chr3  | 69291912 | 69292395 | 484 Sat119CF  | na    | na |
| chr3  | 76309672 | 76309742 | 71 Sat165CF   | na    | na |
| chr3  | 86811307 | 86811515 | 209 Carsat3   | green | na |
| chr3  | 86811633 | 86811798 | 166 Carsat3   | green | na |
| chr3  | 87256508 | 87256657 | 150 Sat52CF   | na    | na |
| chr3  | 87256519 | 87256635 | 117 Sat52CF   | na    | na |
| chr3  | 90143425 | 90143465 | 41 Sat19CF    | na    | na |
| chr3  | 90147282 | 90147881 | 600 Sat41CF   | na    | na |
| chr3  | 90147283 | 90147999 | 717 Sat41CF   | na    | na |
| chr3  | 90771747 | 90772108 | 362 Sat42CF   | na    | na |
| chr3  | 91986714 | 91987147 | 434 Sat30CF   | na    | na |
| chr3  | 93232279 | 93232499 | 221 Carsat3   | green | na |
| chr3  | 94184490 | 94184628 | 139 CarSat1   | red   | na |
| chr3  | 94406431 | 94406890 | 460 Sat110CF  | na    | na |
| chr3  | 94406492 | 94407617 | 1126 Sat110CF | na    | na |
| chr3  | 94407375 | 94407624 | 250 Sat110CF  | na    | na |
| chr3  | 94692561 | 94693582 | 1022 SAT1_CF  | blue  | na |
| chr3  | 94711078 | 94712068 | 991 SAT1_CF   | blue  | na |
| chr30 | 5664451  | 5664522  | 72 Carsat3    | green | na |
| chr30 | 9780483  | 9780541  | 59 Sat21CF    | na    | na |
| chr30 | 11871228 | 11871331 | 104 Sat89CF   | na    | na |
| chr30 | 13210246 | 13210848 | 603 Carsat3   | green | na |
| chr30 | 17886056 | 17886114 | 59 Sat88CF    | na    | na |
| chr30 | 18098951 | 18098979 | 29 SUBTEL_sa  | na    | na |
| chr30 | 19930024 | 19930067 | 44 Sat41CF    | na    | na |
| chr30 | 20919047 | 20919107 | 61 Sat163CF   | na    | na |
| chr30 | 22128721 | 22128766 | 46 Sat15CF    | na    | na |
| chr30 | 24736567 | 24736630 | 64 Sat57CF    | na    | na |
| chr30 | 26050787 | 26050828 | 42 Sat88CF    | na    | na |
| chr30 | 32168956 | 32169000 | 45 Sat65CF    | na    | na |
| chr30 | 33467658 | 33468979 | 1322 Sat139CF | na    | na |
| chr30 | 33468931 | 33468986 | 56 Sat139CF   | na    | na |
| chr30 | 34012867 | 34012899 | 33 Sat91CF    | na    | na |
| chr30 | 36088780 | 36089125 | 346 Sat93CF   | na    | na |
| chr30 | 36088818 | 36089155 | 338 Sat93CF   | na    | na |

|       |          |          |              |        |         |
|-------|----------|----------|--------------|--------|---------|
| chr30 | 36952433 | 36952508 | 76 Sat125CF  | na     | na      |
| chr30 | 40000527 | 40000812 | 286 Sat110CF | na     | na      |
| chr30 | 40875684 | 40876150 | 467 SAT1_CF  | blue   | na      |
| chr30 | 41131431 | 41131502 | 72 Sat149CF  | na     | na      |
| chr30 | 41131481 | 41131502 | 22 Sat149CF  | na     | na      |
| chr30 | 41792308 | 41792475 | 168 SAT1_CF  | blue   | na      |
| chr30 | 42302865 | 42303058 | 194 Sat65CF  | na     | na      |
| chr30 | 43020271 | 43020415 | 145 Sat186CF | na     | na      |
| chr30 | 43020336 | 43020415 | 80 Sat186CF  | na     | na      |
| chr30 | 43195880 | 43196104 | 225 Sat2CF   | purple | na      |
| chr30 | 43195920 | 43196110 | 191 Sat2CF   | purple | na      |
| chr31 | 3031011  | 3031999  | 989 Sat2CF   | purple | pericen |
| chr31 | 3031074  | 3031940  | 867 Sat2CF   | purple | pericen |
| chr31 | 3036499  | 3036891  | 393 SAT1_CF  | blue   | pericen |
| chr31 | 3039107  | 3039772  | 666 Sat2CF   | purple | pericen |
| chr31 | 3039211  | 3039737  | 527 Sat2CF   | purple | pericen |
| chr31 | 3042554  | 3043625  | 1072 SAT1_CF | blue   | pericen |
| chr31 | 3043639  | 3046154  | 2516 SAT1_CF | blue   | pericen |
| chr31 | 3046193  | 3047145  | 953 SAT1_CF  | blue   | pericen |
| chr31 | 3047168  | 3047597  | 430 SAT1_CF  | blue   | pericen |
| chr31 | 3047605  | 3048903  | 1299 CarSat1 | red    | pericen |
| chr31 | 3067208  | 3068036  | 829 Sat2CF   | purple | pericen |
| chr31 | 3075279  | 3076590  | 1312 CarSat1 | red    | pericen |
| chr31 | 3076609  | 3077761  | 1153 CarSat1 | red    | pericen |
| chr31 | 3077774  | 3082574  | 4801 CarSat1 | red    | pericen |
| chr31 | 3082483  | 3084118  | 1636 Carsat2 | orange | pericen |
| chr31 | 3092278  | 3093025  | 748 Carsat2  | orange | pericen |
| chr31 | 3093273  | 3094320  | 1048 Carsat2 | orange | pericen |
| chr31 | 3094662  | 3094797  | 136 Carsat2  | orange | pericen |
| chr31 | 3110574  | 3110912  | 339 Carsat2  | orange | pericen |
| chr31 | 22275135 | 22276223 | 1089 Carsat2 | orange | na      |
| chr31 | 24257623 | 24257845 | 223 Carsat3  | green  | na      |
| chr31 | 28931677 | 28931747 | 71 Sat83CF   | na     | na      |
| chr31 | 29625299 | 29625836 | 538 Sat87CF  | na     | na      |
| chr31 | 31191105 | 31191326 | 222 Sat112CF | na     | na      |
| chr31 | 32176555 | 32177416 | 862 SAT1_CF  | blue   | na      |
| chr31 | 33908992 | 33909067 | 76 Sat86CF   | na     | na      |
| chr31 | 34909716 | 34909787 | 72 Sat63CF   | na     | na      |
| chr31 | 35164442 | 35164502 | 61 Sat154CF  | na     | na      |
| chr31 | 38362540 | 38363117 | 578 Sat84CF  | na     | na      |
| chr31 | 38365978 | 38366551 | 574 Sat94CF  | na     | na      |
| chr31 | 38386138 | 38386186 | 49 Sat18CF   | na     | na      |

|       |          |          |               |        |         |
|-------|----------|----------|---------------|--------|---------|
| chr31 | 38386151 | 38387776 | 1626 Sat18CF  | na     | na      |
| chr31 | 38388158 | 38388214 | 57 Sat18CF    | na     | na      |
| chr31 | 38734315 | 38734454 | 140 Sat72CF   | na     | na      |
| chr31 | 38747367 | 38747448 | 82 Sat5CF     | stalk  | na      |
| chr31 | 39250809 | 39251648 | 840 CarSat1   | red    | na      |
| chr31 | 39336310 | 39336502 | 193 Sat5CF    | stalk  | na      |
| chr31 | 39376753 | 39377129 | 377 Sat63CF   | na     | na      |
| chr31 | 39376792 | 39380651 | 3860 Sat63CF  | na     | na      |
| chr31 | 39380318 | 39380693 | 376 Sat63CF   | na     | na      |
| chr31 | 39824538 | 39824779 | 242 Sat21CF   | na     | na      |
| chr31 | 39867453 | 39867530 | 78 Sat21CF    | na     | na      |
| chr31 | 40752159 | 40752467 | 309 Sat94CF   | na     | na      |
| chr31 | 40962282 | 40962436 | 155 SUBTEL_sa | na     | na      |
| chr31 | 41017346 | 41017428 | 83 Sat21CF    | na     | na      |
| chr31 | 41019377 | 41019472 | 96 Sat21CF    | na     | na      |
| chr31 | 41063064 | 41063851 | 788 Sat37CF   | na     | na      |
| chr31 | 41272059 | 41272167 | 109 Sat5CF    | stalk  | na      |
| chr31 | 41272071 | 41272169 | 99 Sat108CF   | na     | na      |
| chr31 | 42227161 | 42227398 | 238 Sat29CF   | na     | na      |
| chr31 | 42227187 | 42228193 | 1007 Sat29CF  | na     | na      |
| chr31 | 42253948 | 42254625 | 678 Sat2CF    | purple | na      |
| chr31 | 42258576 | 42260013 | 1438 SAT1_CF  | blue   | na      |
| chr32 | 3003993  | 3004385  | 393 SAT1_CF   | blue   | pericen |
| chr32 | 3006408  | 3006950  | 543 Sat2CF    | purple | pericen |
| chr32 | 3006413  | 3006896  | 484 Sat2CF    | purple | pericen |
| chr32 | 3009074  | 3010469  | 1396 CarSat1  | red    | pericen |
| chr32 | 3011059  | 3011387  | 329 Carsat2   | orange | pericen |
| chr32 | 3011582  | 3013863  | 2282 Carsat2  | orange | pericen |
| chr32 | 3013975  | 3014504  | 530 Carsat2   | orange | pericen |
| chr32 | 3015096  | 3015358  | 263 Carsat2   | orange | pericen |
| chr32 | 4873967  | 4874021  | 55 Sat12CF    | na     | pericen |
| chr32 | 7163862  | 7163936  | 75 Sat38CF    | na     | na      |
| chr32 | 14554477 | 14554685 | 209 Carsat3   | green  | na      |
| chr32 | 14826091 | 14826157 | 67 Sat59CF    | na     | na      |
| chr32 | 23961414 | 23961476 | 63 Sat165CF   | na     | na      |
| chr32 | 27181009 | 27181076 | 68 SUBTEL_sa  | na     | na      |
| chr32 | 38782843 | 38783041 | 199 Carsat3   | green  | na      |
| chr32 | 40656826 | 40657029 | 204 Carsat3   | green  | na      |
| chr32 | 41263194 | 41263239 | 46 Sat8CF     | dgreen | na      |
| chr32 | 41721849 | 41722552 | 704 CarSat1   | red    | na      |
| chr32 | 41722573 | 41724164 | 1592 CarSat1  | red    | na      |
| chr32 | 41724185 | 41725426 | 1242 CarSat1  | red    | na      |

|       |          |          |               |        |         |
|-------|----------|----------|---------------|--------|---------|
| chr32 | 41725428 | 41725899 | 472 SAT1_CF   | blue   | na      |
| chr32 | 41725911 | 41728713 | 2803 SAT1_CF  | blue   | na      |
| chr32 | 41728731 | 41729251 | 521 SAT1_CF   | blue   | na      |
| chr32 | 41729264 | 41729879 | 616 SAT1_CF   | blue   | na      |
| chr32 | 41729874 | 41730592 | 719 CarSat1   | red    | na      |
| chr32 | 41730743 | 41731048 | 306 CarSat1   | red    | na      |
| chr33 | 3000078  | 3000371  | 294 CarSat1   | red    | pericen |
| chr33 | 5459011  | 5459117  | 107 Sat21CF   | na     | na      |
| chr33 | 7480512  | 7480548  | 37 Sat86CF    | na     | na      |
| chr33 | 8446010  | 8446110  | 101 Sat31CF   | na     | na      |
| chr33 | 11646014 | 11646079 | 66 Sat77CF    | na     | na      |
| chr33 | 17766693 | 17766738 | 46 Sat151CF   | na     | na      |
| chr33 | 17766702 | 17767729 | 1028 Sat151CF | na     | na      |
| chr33 | 17767510 | 17767754 | 245 Sat151CF  | na     | na      |
| chr33 | 20260917 | 20260988 | 72 Sat62CF    | na     | na      |
| chr33 | 21034803 | 21035216 | 414 Sat24CF   | na     | na      |
| chr33 | 21243729 | 21243777 | 49 Sat7CF     | lime   | na      |
| chr33 | 21504100 | 21504205 | 106 Carsat3   | green  | na      |
| chr33 | 21504316 | 21504867 | 552 Carsat3   | green  | na      |
| chr33 | 22337607 | 22337661 | 55 Sat15CF    | na     | na      |
| chr33 | 23280009 | 23280062 | 54 Sat112CF   | na     | na      |
| chr33 | 26161659 | 26162861 | 1203 Sat149CF | na     | na      |
| chr33 | 26161837 | 26163026 | 1190 Sat149CF | na     | na      |
| chr33 | 26353372 | 26353398 | 27 SUBTEL_sa  | na     | na      |
| chr33 | 29216605 | 29216847 | 243 Sat123CF  | na     | na      |
| chr33 | 29602474 | 29602566 | 93 Sat88CF    | na     | na      |
| chr33 | 29786806 | 29786918 | 113 Sat74CF   | na     | na      |
| chr33 | 29896211 | 29896370 | 160 CarSat1   | red    | na      |
| chr33 | 30562372 | 30562433 | 62 Sat139CF   | na     | na      |
| chr33 | 30597192 | 30597228 | 37 Sat12CF    | na     | na      |
| chr33 | 31062583 | 31062639 | 57 Sat21CF    | na     | na      |
| chr33 | 31235316 | 31236018 | 703 CarSat1   | red    | na      |
| chr33 | 31776357 | 31777505 | 1149 Sat152CF | na     | na      |
| chr33 | 31777507 | 31777535 | 29 Sat152CF   | na     | na      |
| chr33 | 32125108 | 32126327 | 1220 Sat35CF  | na     | na      |
| chr33 | 32125243 | 32129984 | 4742 Sat35CF  | na     | na      |
| chr33 | 32127997 | 32130254 | 2258 Sat35CF  | na     | na      |
| chr33 | 32283073 | 32283249 | 177 Sat99CF   | na     | na      |
| chr33 | 32283779 | 32284211 | 433 Sat83CF   | na     | na      |
| chr33 | 32331206 | 32331263 | 58 Sat65CF    | na     | na      |
| chr33 | 33325825 | 33326090 | 266 Sat14CF   | na     | na      |
| chr33 | 33439576 | 33439625 | 50 Sat6CF     | select | na      |

|       |          |          |               |        |         |
|-------|----------|----------|---------------|--------|---------|
| chr33 | 33617537 | 33617763 | 227 Sat39CF   | na     | na      |
| chr33 | 33830688 | 33830723 | 36 Sat50CF    | na     | na      |
| chr33 | 34413813 | 34415135 | 1323 Carsat2  | orange | na      |
| chr33 | 34415171 | 34416592 | 1422 Carsat2  | orange | na      |
| chr33 | 34423376 | 34424071 | 696 Carsat2   | orange | na      |
| chr34 | 3000218  | 3000523  | 306 CarSat1   | red    | pericen |
| chr34 | 3000678  | 3001400  | 723 CarSat1   | red    | pericen |
| chr34 | 3001411  | 3003737  | 2327 SAT1_CF  | blue   | pericen |
| chr34 | 3003783  | 3004956  | 1174 SAT1_CF  | blue   | pericen |
| chr34 | 3004978  | 3005601  | 624 SAT1_CF   | blue   | pericen |
| chr34 | 3005641  | 3006041  | 401 SAT1_CF   | blue   | pericen |
| chr34 | 3006088  | 3006636  | 549 SAT1_CF   | blue   | pericen |
| chr34 | 3006678  | 3007202  | 525 SAT1_CF   | blue   | pericen |
| chr34 | 3007213  | 3009024  | 1812 SAT1_CF  | blue   | pericen |
| chr34 | 3009029  | 3011739  | 2711 CarSat1  | red    | pericen |
| chr34 | 3011760  | 3012284  | 525 CarSat1   | red    | pericen |
| chr34 | 3012684  | 3013804  | 1121 Sat2CF   | purple | pericen |
| chr34 | 3013675  | 3013852  | 178 Sat2CF    | purple | pericen |
| chr34 | 3028935  | 3029793  | 859 Sat2CF    | purple | pericen |
| chr34 | 3043659  | 3044730  | 1072 Sat2CF   | purple | pericen |
| chr34 | 3089823  | 3090344  | 522 Sat2CF    | purple | pericen |
| chr34 | 3089887  | 3090715  | 829 Sat2CF    | purple | pericen |
| chr34 | 3097407  | 3097559  | 153 CarSat1   | red    | pericen |
| chr34 | 3123942  | 3125564  | 1623 Carsat2  | orange | pericen |
| chr34 | 6684056  | 6684336  | 281 Sat60CF   | na     | na      |
| chr34 | 8438836  | 8439075  | 240 Sat18CF   | na     | na      |
| chr34 | 10884230 | 10884335 | 106 Sat63CF   | na     | na      |
| chr34 | 11378702 | 11378895 | 194 Sat120CF  | na     | na      |
| chr34 | 11378896 | 11380778 | 1883 Sat120CF | na     | na      |
| chr34 | 11380779 | 11380831 | 53 Sat120CF   | na     | na      |
| chr34 | 11604501 | 11604828 | 328 Sat5CF    | stalk  | na      |
| chr34 | 11604534 | 11604862 | 329 Sat5CF    | stalk  | na      |
| chr34 | 11604575 | 11604798 | 224 Sat5CF    | stalk  | na      |
| chr34 | 13449412 | 13449676 | 265 Sat57CF   | na     | na      |
| chr34 | 13449442 | 13449677 | 236 Sat57CF   | na     | na      |
| chr34 | 13449547 | 13449768 | 222 Sat57CF   | na     | na      |
| chr34 | 13477358 | 13477707 | 350 Sat72CF   | na     | na      |
| chr34 | 13541580 | 13541631 | 52 Sat88CF    | na     | na      |
| chr34 | 13682240 | 13682320 | 81 Sat107CF   | na     | na      |
| chr34 | 14102384 | 14102686 | 303 Sat93CF   | na     | na      |
| chr34 | 14102413 | 14102624 | 212 Sat93CF   | na     | na      |
| chr34 | 14224936 | 14224991 | 56 Sat72CF    | na     | na      |

|       |          |          |               |        |    |
|-------|----------|----------|---------------|--------|----|
| chr34 | 14513501 | 14513939 | 439 Sat74CF   | na     | na |
| chr34 | 14513553 | 14513841 | 289 Sat74CF   | na     | na |
| chr34 | 14522859 | 14522940 | 82 Sat97CF    | na     | na |
| chr34 | 14818401 | 14822334 | 3934 Sat109CF | na     | na |
| chr34 | 14822260 | 14822361 | 102 Sat109CF  | na     | na |
| chr34 | 14914593 | 14914690 | 98 Sat104CF   | na     | na |
| chr34 | 15090687 | 15090836 | 150 Sat2CF    | purple | na |
| chr34 | 15090726 | 15090829 | 104 Sat2CF    | purple | na |
| chr34 | 15106894 | 15106946 | 53 SAT1_CF    | blue   | na |
| chr34 | 15107253 | 15107489 | 237 SAT1_CF   | blue   | na |
| chr34 | 15107822 | 15108061 | 240 SAT1_CF   | blue   | na |
| chr34 | 15122604 | 15123184 | 581 SAT1_CF   | blue   | na |
| chr34 | 15123580 | 15123646 | 67 SAT1_CF    | blue   | na |
| chr34 | 15146423 | 15146589 | 167 Sat2CF    | purple | na |
| chr34 | 15146423 | 15146589 | 167 Sat2CF    | purple | na |
| chr34 | 15232619 | 15232824 | 206 Sat2CF    | purple | na |
| chr34 | 15232657 | 15232842 | 186 Sat2CF    | purple | na |
| chr34 | 15232669 | 15232878 | 210 Sat2CF    | purple | na |
| chr34 | 15245285 | 15245536 | 252 SAT1_CF   | blue   | na |
| chr34 | 15245840 | 15245996 | 157 SAT1_CF   | blue   | na |
| chr34 | 15273636 | 15273703 | 68 SAT1_CF    | blue   | na |
| chr34 | 15295922 | 15296298 | 377 Sat2CF    | purple | na |
| chr34 | 15295991 | 15296245 | 255 Sat2CF    | purple | na |
| chr34 | 15300997 | 15301096 | 100 Carsat2   | orange | na |
| chr34 | 15309060 | 15309276 | 217 Sat2CF    | purple | na |
| chr34 | 15309170 | 15309231 | 62 Sat2CF     | purple | na |
| chr34 | 15313603 | 15313690 | 88 SAT1_CF    | blue   | na |
| chr34 | 15343387 | 15343450 | 64 SAT1_CF    | blue   | na |
| chr34 | 15343749 | 15343999 | 251 SAT1_CF   | blue   | na |
| chr34 | 15365335 | 15365513 | 179 Sat2CF    | purple | na |
| chr34 | 15377459 | 15377570 | 112 SAT1_CF   | blue   | na |
| chr34 | 15392881 | 15392987 | 107 SAT1_CF   | blue   | na |
| chr34 | 15415197 | 15415255 | 59 SAT1_CF    | blue   | na |
| chr34 | 15415707 | 15415794 | 88 SAT1_CF    | blue   | na |
| chr34 | 15442157 | 15442333 | 177 Sat2CF    | purple | na |
| chr34 | 15442201 | 15442487 | 287 Sat2CF    | purple | na |
| chr34 | 15442293 | 15442533 | 241 Sat2CF    | purple | na |
| chr34 | 15451528 | 15451589 | 62 SAT1_CF    | blue   | na |
| chr34 | 15452141 | 15452249 | 109 SAT1_CF   | blue   | na |
| chr34 | 15478190 | 15478524 | 335 Sat2CF    | purple | na |
| chr34 | 15478235 | 15478539 | 305 Sat2CF    | purple | na |
| chr34 | 15478275 | 15478512 | 238 Sat2CF    | purple | na |



|       |          |          |               |        |         |
|-------|----------|----------|---------------|--------|---------|
| chr34 | 15478303 | 15478577 | 275 Sat2CF    | purple | na      |
| chr34 | 15483408 | 15483687 | 280 Carsat2   | orange | na      |
| chr34 | 15496979 | 15497068 | 90 SAT1_CF    | blue   | na      |
| chr34 | 15508081 | 15508177 | 97 Carsat2    | orange | na      |
| chr34 | 19564603 | 19564667 | 65 SUBTEL_sa  | na     | na      |
| chr34 | 23123954 | 23124061 | 108 Carsat3   | green  | na      |
| chr34 | 27866434 | 27866517 | 84 Sat36CF    | na     | na      |
| chr34 | 29324844 | 29324967 | 124 Sat105CF  | na     | na      |
| chr34 | 29325187 | 29325303 | 117 Sat105CF  | na     | na      |
| chr34 | 30400736 | 30400773 | 38 Sat179CF   | na     | na      |
| chr34 | 30593635 | 30594304 | 670 Sat7CF    | lime   | na      |
| chr34 | 30593730 | 30594289 | 560 Sat7CF    | lime   | na      |
| chr34 | 31984478 | 31984592 | 115 Sat32CF   | na     | na      |
| chr34 | 32856931 | 32857597 | 667 Sat7CF    | lime   | na      |
| chr34 | 32856946 | 32857502 | 557 Sat7CF    | lime   | na      |
| chr34 | 34522926 | 34522975 | 50 Sat36CF    | na     | na      |
| chr34 | 37304447 | 37304624 | 178 CarSat1   | red    | na      |
| chr34 | 37304617 | 37304680 | 64 SAT1_CF    | blue   | na      |
| chr34 | 38659055 | 38659114 | 60 Sat2CF     | purple | na      |
| chr34 | 39880962 | 39881060 | 99 Sat52CF    | na     | na      |
| chr34 | 40591852 | 40591879 | 28 Sat53CF    | na     | na      |
| chr34 | 44069108 | 44069391 | 284 Sat44CF   | na     | na      |
| chr34 | 44338564 | 44339691 | 1128 Sat184CF | na     | na      |
| chr34 | 44414733 | 44414832 | 100 Sat27CF   | na     | na      |
| chr34 | 44559485 | 44559830 | 346 Sat16CF   | na     | na      |
| chr34 | 44680131 | 44680441 | 311 Sat14CF   | na     | na      |
| chr34 | 44813398 | 44813600 | 203 Sat43CF   | na     | na      |
| chr34 | 44965507 | 44965545 | 39 Sat96CF    | na     | na      |
| chr34 | 45119549 | 45119852 | 304 Sat29CF   | na     | na      |
| chr35 | 3016318  | 3017041  | 724 Sat2CF    | purple | pericen |
| chr35 | 3016898  | 3017060  | 163 Sat2CF    | purple | pericen |
| chr35 | 3035569  | 3036031  | 463 Sat2CF    | purple | pericen |
| chr35 | 3061799  | 3061919  | 121 Sat2CF    | purple | pericen |
| chr35 | 3061814  | 3061923  | 110 Sat2CF    | purple | pericen |
| chr35 | 3724864  | 3725318  | 455 Sat42CF   | na     | pericen |
| chr35 | 4106968  | 4107077  | 110 Sat62CF   | na     | pericen |
| chr35 | 5016191  | 5016425  | 235 Sat21CF   | na     | na      |
| chr35 | 11338762 | 11339733 | 972 Sat39CF   | na     | na      |
| chr35 | 19264291 | 19264464 | 174 SAT1_CF   | blue   | na      |
| chr35 | 19383877 | 19383946 | 70 Sat31CF    | na     | na      |
| chr35 | 21344610 | 21344660 | 51 SUBTEL_sa  | na     | na      |
| chr35 | 23134541 | 23134572 | 32 Sat11CF    | na     | na      |

|       |          |          |               |        |    |
|-------|----------|----------|---------------|--------|----|
| chr35 | 24844183 | 24844260 | 78 Sat42CF    | na     | na |
| chr35 | 27396573 | 27396669 | 97 Carsat3    | green  | na |
| chr35 | 27396952 | 27397618 | 667 Carsat3   | green  | na |
| chr35 | 27726186 | 27727591 | 1406 Carsat3  | green  | na |
| chr35 | 27740793 | 27741463 | 671 Carsat3   | green  | na |
| chr35 | 27741650 | 27741679 | 30 Carsat3    | green  | na |
| chr35 | 27741690 | 27741938 | 249 Carsat3   | green  | na |
| chr35 | 27761759 | 27762556 | 798 Carsat3   | green  | na |
| chr35 | 27765790 | 27766425 | 636 Sat103CF  | na     | na |
| chr35 | 27765857 | 27766889 | 1033 Sat103CF | na     | na |
| chr35 | 27766968 | 27767314 | 347 Sat103CF  | na     | na |
| chr35 | 27767504 | 27768862 | 1359 Sat103CF | na     | na |
| chr35 | 27768663 | 27768885 | 223 Sat103CF  | na     | na |
| chr35 | 27794682 | 27796278 | 1597 Carsat3  | green  | na |
| chr35 | 28271167 | 28271694 | 528 Carsat3   | green  | na |
| chr35 | 28277093 | 28277225 | 133 Carsat3   | green  | na |
| chr35 | 28277257 | 28277445 | 189 Carsat3   | green  | na |
| chr35 | 28287142 | 28287939 | 798 Carsat3   | green  | na |
| chr35 | 28305828 | 28306237 | 410 Carsat3   | green  | na |
| chr35 | 28335173 | 28335963 | 791 Carsat3   | green  | na |
| chr35 | 28343956 | 28344118 | 163 Carsat3   | green  | na |
| chr35 | 28344229 | 28344537 | 309 Carsat3   | green  | na |
| chr35 | 28361824 | 28362405 | 582 Carsat3   | green  | na |
| chr35 | 28362448 | 28362808 | 361 Carsat3   | green  | na |
| chr35 | 28401964 | 28402131 | 168 Carsat3   | green  | na |
| chr35 | 28402232 | 28402624 | 393 Carsat3   | green  | na |
| chr35 | 28433324 | 28434043 | 720 Carsat3   | green  | na |
| chr35 | 28474454 | 28475047 | 594 Carsat3   | green  | na |
| chr35 | 28514550 | 28514942 | 393 Carsat3   | green  | na |
| chr35 | 28515043 | 28515210 | 168 Carsat3   | green  | na |
| chr35 | 28537443 | 28537886 | 444 Carsat3   | green  | na |
| chr35 | 28546496 | 28547534 | 1039 Carsat3  | green  | na |
| chr35 | 28568056 | 28568462 | 407 Carsat3   | green  | na |
| chr35 | 28584239 | 28584882 | 644 Carsat3   | green  | na |
| chr35 | 28999009 | 28999223 | 215 Carsat3   | green  | na |
| chr35 | 29403467 | 29403707 | 241 Sat74CF   | na     | na |
| chr35 | 29473840 | 29474512 | 673 Carsat2   | orange | na |
| chr35 | 29474691 | 29475541 | 851 Carsat2   | orange | na |
| chr35 | 29475718 | 29477627 | 1910 Carsat2  | orange | na |
| chr35 | 29478874 | 29479226 | 353 Carsat2   | orange | na |
| chr35 | 29539909 | 29540432 | 524 Carsat2   | orange | na |
| chr35 | 29540639 | 29542582 | 1944 Carsat2  | orange | na |

|       |          |          |              |        |         |
|-------|----------|----------|--------------|--------|---------|
| chr36 | 3491042  | 3491547  | 506 Sat13CF  | na     | pericen |
| chr36 | 9161650  | 9161704  | 55 Sat104CF  | na     | na      |
| chr36 | 10699068 | 10699286 | 219 Sat17CF  | na     | na      |
| chr36 | 11199656 | 11199737 | 82 Sat27CF   | na     | na      |
| chr36 | 13184296 | 13185938 | 1643 Sat50CF | na     | na      |
| chr36 | 13640354 | 13640427 | 74 Sat26CF   | na     | na      |
| chr36 | 15118521 | 15118552 | 32 Sat46CF   | na     | na      |
| chr36 | 16047531 | 16047573 | 43 Sat137CF  | na     | na      |
| chr36 | 23858453 | 23858645 | 193 CarSat1  | red    | na      |
| chr36 | 23994835 | 23995349 | 515 Sat8CF   | dgreen | na      |
| chr36 | 23996465 | 23996967 | 503 Sat8CF   | dgreen | na      |
| chr36 | 23996630 | 23996968 | 339 Sat8CF   | dgreen | na      |
| chr36 | 25295446 | 25295546 | 101 Sat61CF  | na     | na      |
| chr36 | 25296709 | 25296818 | 110 Sat61CF  | na     | na      |
| chr36 | 25297007 | 25297123 | 117 Sat61CF  | na     | na      |
| chr36 | 25297266 | 25297360 | 95 Sat61CF   | na     | na      |
| chr36 | 25297614 | 25297736 | 123 Sat61CF  | na     | na      |
| chr36 | 25298194 | 25298247 | 54 Sat61CF   | na     | na      |
| chr36 | 25298625 | 25299602 | 978 Sat61CF  | na     | na      |
| chr36 | 25299494 | 25299617 | 124 Sat61CF  | na     | na      |
| chr36 | 25299693 | 25299803 | 111 Sat61CF  | na     | na      |
| chr36 | 25299709 | 25301157 | 1449 Sat61CF | na     | na      |
| chr36 | 25300096 | 25301585 | 1490 Sat61CF | na     | na      |
| chr36 | 25300287 | 25301777 | 1491 Sat61CF | na     | na      |
| chr36 | 25301717 | 25301791 | 75 Sat61CF   | na     | na      |
| chr36 | 25302006 | 25302329 | 324 Sat61CF  | na     | na      |
| chr36 | 25302590 | 25302668 | 79 Sat61CF   | na     | na      |
| chr36 | 25304313 | 25304922 | 610 Sat61CF  | na     | na      |
| chr36 | 25304422 | 25304965 | 544 Sat61CF  | na     | na      |
| chr36 | 25304449 | 25304922 | 474 Sat61CF  | na     | na      |
| chr36 | 25306428 | 25306527 | 100 Sat61CF  | na     | na      |
| chr36 | 25307069 | 25307185 | 117 Sat61CF  | na     | na      |
| chr36 | 25307720 | 25307825 | 106 Sat61CF  | na     | na      |
| chr36 | 25309405 | 25309429 | 25 Sat61CF   | na     | na      |
| chr36 | 25310677 | 25310771 | 95 Sat61CF   | na     | na      |
| chr36 | 25312040 | 25312136 | 97 Sat61CF   | na     | na      |
| chr36 | 25312660 | 25312781 | 122 Sat61CF  | na     | na      |
| chr36 | 25312710 | 25312793 | 84 Sat61CF   | na     | na      |
| chr36 | 25314061 | 25314155 | 95 Sat61CF   | na     | na      |
| chr36 | 25314073 | 25314155 | 83 Sat61CF   | na     | na      |
| chr36 | 25314500 | 25314545 | 46 Sat130CF  | na     | na      |
| chr36 | 25314520 | 25314545 | 26 Sat51CF   | na     | na      |

|       |          |          |              |        |         |
|-------|----------|----------|--------------|--------|---------|
| chr36 | 25315017 | 25315118 | 102 Sat61CF  | na     | na      |
| chr36 | 25315287 | 25315403 | 117 Sat61CF  | na     | na      |
| chr36 | 25315304 | 25315403 | 100 Sat61CF  | na     | na      |
| chr36 | 25315641 | 25315755 | 115 Sat61CF  | na     | na      |
| chr36 | 25316209 | 25316303 | 95 Sat61CF   | na     | na      |
| chr36 | 25316472 | 25316608 | 137 Sat61CF  | na     | na      |
| chr36 | 25317149 | 25317251 | 103 Sat61CF  | na     | na      |
| chr36 | 25321866 | 25321968 | 103 Sat61CF  | na     | na      |
| chr36 | 25326089 | 25326182 | 94 Sat61CF   | na     | na      |
| chr36 | 25329694 | 25329807 | 114 Sat61CF  | na     | na      |
| chr36 | 28066013 | 28066817 | 805 Sat150CF | na     | na      |
| chr36 | 28066040 | 28066912 | 873 Sat64CF  | na     | na      |
| chr36 | 31936356 | 31937679 | 1324 Sat95CF | na     | na      |
| chr36 | 32075425 | 32075465 | 41 Sat185CF  | na     | na      |
| chr36 | 33222037 | 33222392 | 356 Sat94CF  | na     | na      |
| chr37 | 3002799  | 3003510  | 712 CarSat1  | red    | pericen |
| chr37 | 3005142  | 3005339  | 198 Sat2CF   | purple | pericen |
| chr37 | 3005210  | 3006294  | 1085 Sat2CF  | purple | pericen |
| chr37 | 3027394  | 3028501  | 1108 Sat2CF  | purple | pericen |
| chr37 | 3051274  | 3051632  | 359 Sat2CF   | purple | pericen |
| chr37 | 3051351  | 3051695  | 345 Sat2CF   | purple | pericen |
| chr37 | 3064180  | 3065255  | 1076 Sat2CF  | purple | pericen |
| chr37 | 3088743  | 3089922  | 1180 Sat2CF  | purple | pericen |
| chr37 | 3113193  | 3113700  | 508 Sat2CF   | purple | pericen |
| chr37 | 3113246  | 3114583  | 1338 Sat2CF  | purple | pericen |
| chr37 | 3142173  | 3142732  | 560 SAT1_CF  | blue   | pericen |
| chr37 | 3732909  | 3733291  | 383 Sat4CF   | lred   | pericen |
| chr37 | 4503586  | 4503976  | 391 Sat14CF  | na     | pericen |
| chr37 | 6790761  | 6791050  | 290 Sat18CF  | na     | na      |
| chr37 | 8759079  | 8759492  | 414 Sat82CF  | na     | na      |
| chr37 | 8759122  | 8759994  | 873 Sat82CF  | na     | na      |
| chr37 | 9258638  | 9258804  | 167 CarSat1  | red    | na      |
| chr37 | 9287051  | 9287202  | 152 Sat17CF  | na     | na      |
| chr37 | 9287385  | 9287470  | 86 Sat17CF   | na     | na      |
| chr37 | 13849309 | 13849372 | 64 Sat165CF  | na     | na      |
| chr37 | 15375205 | 15375675 | 471 Sat17CF  | na     | na      |
| chr37 | 16905874 | 16905960 | 87 Sat62CF   | na     | na      |
| chr37 | 25784412 | 25784456 | 45 Sat139CF  | na     | na      |
| chr37 | 25850831 | 25850914 | 84 Sat77CF   | na     | na      |
| chr37 | 27782787 | 27783062 | 276 Sat30CF  | na     | na      |
| chr37 | 30562301 | 30562412 | 112 Sat61CF  | na     | na      |
| chr37 | 31800834 | 31801149 | 316 Sat65CF  | na     | na      |

|       |          |          |               |        |         |
|-------|----------|----------|---------------|--------|---------|
| chr37 | 31800854 | 31801132 | 279 Sat65CF   | na     | na      |
| chr37 | 32001043 | 32001250 | 208 Sat42CF   | na     | na      |
| chr37 | 33871061 | 33871801 | 741 Sat4CF    | lred   | na      |
| chr38 | 3428370  | 3428419  | 50 Sat109CF   | na     | pericen |
| chr38 | 3975198  | 3975256  | 59 Sat52CF    | na     | pericen |
| chr38 | 16375482 | 16376726 | 1245 Sat137CF | na     | na      |
| chr38 | 17900830 | 17901187 | 358 Sat38CF   | na     | na      |
| chr38 | 17976848 | 17976890 | 43 Sat45CF    | na     | na      |
| chr38 | 18020983 | 18021079 | 97 Sat107CF   | na     | na      |
| chr38 | 19431261 | 19431489 | 229 Sat140CF  | na     | na      |
| chr38 | 19431290 | 19431489 | 200 Sat140CF  | na     | na      |
| chr38 | 19800080 | 19800181 | 102 Sat42CF   | na     | na      |
| chr38 | 21381053 | 21381121 | 69 Sat63CF    | na     | na      |
| chr38 | 24257956 | 24258038 | 83 Sat107CF   | na     | na      |
| chr38 | 24641354 | 24641517 | 164 CarSat1   | red    | na      |
| chr38 | 24987467 | 24987500 | 34 Sat11CF    | na     | na      |
| chr38 | 25202886 | 25203049 | 164 Sat51CF   | na     | na      |
| chr38 | 25231901 | 25232303 | 403 CarSat1   | red    | na      |
| chr38 | 25320995 | 25322765 | 1771 Sat166CF | na     | na      |
| chr38 | 25322766 | 25322854 | 89 Sat166CF   | na     | na      |
| chr38 | 25806326 | 25807025 | 700 Sat28CF   | na     | na      |
| chr38 | 26526592 | 26528232 | 1641 Sat68CF  | na     | na      |
| chr38 | 26528202 | 26528237 | 36 Sat68CF    | na     | na      |
| chr38 | 26579624 | 26579888 | 265 Sat74CF   | na     | na      |
| chr38 | 26587070 | 26588145 | 1076 Sat69CF  | na     | na      |
| chr38 | 26893494 | 26894756 | 1263 SAT1_CF  | blue   | na      |
| chr38 | 26897623 | 26897726 | 104 Sat2CF    | purple | na      |
| chr4  | 3153148  | 3154074  | 927 Carsat3   | green  | pericen |
| chr4  | 3154085  | 3154235  | 151 Carsat3   | green  | pericen |
| chr4  | 3263752  | 3264634  | 883 Carsat3   | green  | pericen |
| chr4  | 3264667  | 3264793  | 127 Carsat3   | green  | pericen |
| chr4  | 3333315  | 3335012  | 1698 Carsat3  | green  | pericen |
| chr4  | 3394186  | 3394311  | 126 Carsat3   | green  | pericen |
| chr4  | 3394355  | 3395876  | 1522 Carsat3  | green  | pericen |
| chr4  | 3434857  | 3436229  | 1373 Carsat3  | green  | pericen |
| chr4  | 3436427  | 3436500  | 74 Carsat3    | green  | pericen |
| chr4  | 5914923  | 5915060  | 138 Carsat3   | green  | na      |
| chr4  | 5915165  | 5915395  | 231 Carsat3   | green  | na      |
| chr4  | 8485816  | 8485893  | 78 Carsat2    | orange | na      |
| chr4  | 8643305  | 8643614  | 310 Sat51CF   | na     | na      |
| chr4  | 8643337  | 8643602  | 266 Sat51CF   | na     | na      |
| chr4  | 10002922 | 10002988 | 67 Sat58CF    | na     | na      |

|      |          |          |              |        |    |
|------|----------|----------|--------------|--------|----|
| chr4 | 10523727 | 10523986 | 260 Sat60CF  | na     | na |
| chr4 | 10523750 | 10524014 | 265 Sat97CF  | na     | na |
| chr4 | 12206107 | 12206158 | 52 Sat69CF   | na     | na |
| chr4 | 12505827 | 12505881 | 55 Sat37CF   | na     | na |
| chr4 | 13511576 | 13511962 | 387 Carsat2  | orange | na |
| chr4 | 13512176 | 13512598 | 423 Carsat2  | orange | na |
| chr4 | 13512609 | 13513744 | 1136 Carsat2 | orange | na |
| chr4 | 13513911 | 13514745 | 835 Carsat2  | orange | na |
| chr4 | 13532340 | 13532805 | 466 Carsat2  | orange | na |
| chr4 | 14945683 | 14945973 | 291 Sat17CF  | na     | na |
| chr4 | 16916896 | 16917385 | 490 Sat17CF  | na     | na |
| chr4 | 17516166 | 17516219 | 54 Sat110CF  | na     | na |
| chr4 | 17784193 | 17784325 | 133 CarSat1  | red    | na |
| chr4 | 23762145 | 23762428 | 284 Sat28CF  | na     | na |
| chr4 | 26167268 | 26167501 | 234 Sat50CF  | na     | na |
| chr4 | 26167284 | 26167482 | 199 Sat50CF  | na     | na |
| chr4 | 28755779 | 28755980 | 202 Sat12CF  | na     | na |
| chr4 | 30469997 | 30470064 | 68 Sat36CF   | na     | na |
| chr4 | 30765053 | 30765682 | 630 CarSat1  | red    | na |
| chr4 | 31448019 | 31448169 | 151 Sat49CF  | na     | na |
| chr4 | 33694129 | 33694186 | 58 Sat63CF   | na     | na |
| chr4 | 36743575 | 36743945 | 371 Sat47CF  | na     | na |
| chr4 | 36743653 | 36743958 | 306 Sat18CF  | na     | na |
| chr4 | 36888128 | 36888586 | 459 Sat64CF  | na     | na |
| chr4 | 36888129 | 36888642 | 514 Sat64CF  | na     | na |
| chr4 | 36961643 | 36961795 | 153 Sat53CF  | na     | na |
| chr4 | 37728604 | 37728952 | 349 Sat47CF  | na     | na |
| chr4 | 37779962 | 37780029 | 68 Sat21CF   | na     | na |
| chr4 | 37991493 | 37992066 | 574 Sat19CF  | na     | na |
| chr4 | 38331642 | 38332305 | 664 Carsat2  | orange | na |
| chr4 | 38358961 | 38359703 | 743 CarSat1  | red    | na |
| chr4 | 38365927 | 38368704 | 2778 CarSat1 | red    | na |
| chr4 | 38368717 | 38369141 | 425 CarSat1  | red    | na |
| chr4 | 38379095 | 38380224 | 1130 Carsat2 | orange | na |
| chr4 | 38380276 | 38380684 | 409 Carsat2  | orange | na |
| chr4 | 38380883 | 38381505 | 623 Carsat2  | orange | na |
| chr4 | 38395185 | 38395400 | 216 Carsat2  | orange | na |
| chr4 | 38395567 | 38395634 | 68 Carsat2   | orange | na |
| chr4 | 38396076 | 38397235 | 1160 Carsat2 | orange | na |
| chr4 | 38397424 | 38397438 | 15 Carsat2   | orange | na |
| chr4 | 38397541 | 38397633 | 93 Carsat2   | orange | na |
| chr4 | 38397882 | 38399357 | 1476 Carsat2 | orange | na |

|      |          |          |      |          |        |         |
|------|----------|----------|------|----------|--------|---------|
| chr4 | 38399350 | 38400754 | 1405 | CarSat1  | red    | na      |
| chr4 | 38400972 | 38401517 | 546  | CarSat1  | red    | na      |
| chr4 | 38404507 | 38407662 | 3156 | CarSat1  | red    | na      |
| chr4 | 38407468 | 38408267 | 800  | Carsat2  | orange | na      |
| chr4 | 38407851 | 38408338 | 488  | CarSat1  | red    | na      |
| chr4 | 38413660 | 38414393 | 734  | Carsat2  | orange | na      |
| chr4 | 38414509 | 38415051 | 543  | Carsat2  | orange | na      |
| chr4 | 38415283 | 38415882 | 600  | Carsat2  | orange | na      |
| chr4 | 38415911 | 38416113 | 203  | Carsat2  | orange | na      |
| chr4 | 38416276 | 38417074 | 799  | Carsat2  | orange | na      |
| chr4 | 38417206 | 38418154 | 949  | Carsat2  | orange | na      |
| chr4 | 38418966 | 38420247 | 1282 | Carsat2  | orange | na      |
| chr4 | 38422918 | 38424201 | 1284 | Carsat2  | orange | na      |
| chr4 | 38424397 | 38425680 | 1284 | Carsat2  | orange | na      |
| chr4 | 38425866 | 38425973 | 108  | CarSat1  | red    | na      |
| chr4 | 43917168 | 43917227 | 60   | Sat107CF | na     | na      |
| chr4 | 45520721 | 45520795 | 75   | Sat12CF  | na     | na      |
| chr4 | 55171845 | 55171920 | 76   | Sat109CF | na     | na      |
| chr4 | 59244519 | 59244578 | 60   | Sat94CF  | na     | na      |
| chr4 | 61353947 | 61354025 | 79   | Sat150CF | na     | na      |
| chr4 | 61399648 | 61399939 | 292  | Sat5CF   | stalk  | na      |
| chr4 | 61439010 | 61439718 | 709  | Carsat3  | green  | na      |
| chr4 | 61479483 | 61480602 | 1120 | Carsat3  | green  | na      |
| chr4 | 61507760 | 61508934 | 1175 | Carsat3  | green  | na      |
| chr4 | 63150623 | 63150761 | 139  | Sat5CF   | stalk  | na      |
| chr4 | 66498818 | 66498890 | 73   | CarSat1  | red    | na      |
| chr4 | 70867682 | 70868256 | 575  | Carsat3  | green  | na      |
| chr4 | 73436287 | 73436537 | 251  | Sat17CF  | na     | na      |
| chr4 | 73436308 | 73436411 | 104  | Sat17CF  | na     | na      |
| chr4 | 73436410 | 73436497 | 88   | Sat17CF  | na     | na      |
| chr4 | 76870835 | 76871163 | 329  | Sat7CF   | lime   | na      |
| chr4 | 81421154 | 81421236 | 83   | Sat77CF  | na     | na      |
| chr4 | 83027623 | 83027659 | 37   | Sat108CF | na     | na      |
| chr4 | 84810523 | 84811055 | 533  | Sat137CF | na     | na      |
| chr4 | 87622024 | 87622193 | 170  | Sat47CF  | na     | na      |
| chr4 | 89049659 | 89049937 | 279  | Sat74CF  | na     | na      |
| chr4 | 90565466 | 90565592 | 127  | Sat129CF | na     | na      |
| chr4 | 90565500 | 90567088 | 1589 | Sat129CF | na     | na      |
| chr4 | 90566987 | 90567128 | 142  | Sat129CF | na     | na      |
| chr4 | 90829823 | 90830558 | 736  | Sat82CF  | na     | na      |
| chr4 | 91483001 | 91483774 | 774  | Carsat2  | orange | na      |
| chr5 | 3104337  | 3104874  | 538  | SAT1_CF  | blue   | pericen |

|      |          |          |               |        |         |
|------|----------|----------|---------------|--------|---------|
| chr5 | 3287415  | 3287615  | 201 Sat13CF   | na     | pericen |
| chr5 | 3287743  | 3289114  | 1372 Sat13CF  | na     | pericen |
| chr5 | 3349950  | 3351755  | 1806 Sat49CF  | na     | pericen |
| chr5 | 3931265  | 3931409  | 145 Sat42CF   | na     | pericen |
| chr5 | 3931342  | 3931409  | 68 Sat42CF    | na     | pericen |
| chr5 | 4376400  | 4377844  | 1445 Sat113CF | na     | pericen |
| chr5 | 7314136  | 7314168  | 33 Sat94CF    | na     | na      |
| chr5 | 7513878  | 7514255  | 378 Sat38CF   | na     | na      |
| chr5 | 7513929  | 7514269  | 341 Sat38CF   | na     | na      |
| chr5 | 7839065  | 7839742  | 678 Carsat3   | green  | na      |
| chr5 | 7839974  | 7840193  | 220 Carsat3   | green  | na      |
| chr5 | 9682522  | 9682647  | 126 Sat27CF   | na     | na      |
| chr5 | 10349000 | 10349050 | 51 Sat59CF    | na     | na      |
| chr5 | 11848393 | 11848663 | 271 Sat108CF  | na     | na      |
| chr5 | 11848407 | 11848629 | 223 Sat108CF  | na     | na      |
| chr5 | 12200885 | 12200922 | 38 Sat103CF   | na     | na      |
| chr5 | 13496797 | 13496829 | 33 Sat139CF   | na     | na      |
| chr5 | 13725211 | 13725366 | 156 Carsat3   | green  | na      |
| chr5 | 13725447 | 13725673 | 227 Carsat3   | green  | na      |
| chr5 | 13725815 | 13725955 | 141 Carsat3   | green  | na      |
| chr5 | 17355426 | 17355514 | 89 SAT1_CF    | blue   | na      |
| chr5 | 17396775 | 17396848 | 74 Sat21CF    | na     | na      |
| chr5 | 18672915 | 18672972 | 58 Sat39CF    | na     | na      |
| chr5 | 18752121 | 18752249 | 129 CarSat1   | red    | na      |
| chr5 | 19751170 | 19751244 | 75 SUBTEL_sa  | na     | na      |
| chr5 | 21378362 | 21378479 | 118 Sat9CF    | na     | na      |
| chr5 | 22099920 | 22100094 | 175 Carsat3   | green  | na      |
| chr5 | 26712074 | 26712177 | 104 Sat17CF   | na     | na      |
| chr5 | 26712378 | 26712520 | 143 Sat17CF   | na     | na      |
| chr5 | 33026342 | 33027364 | 1023 Sat2CF   | purple | na      |
| chr5 | 33027220 | 33027382 | 163 Sat2CF    | purple | na      |
| chr5 | 33085406 | 33085767 | 362 Sat7CF    | lime   | na      |
| chr5 | 33085552 | 33085797 | 246 Sat7CF    | lime   | na      |
| chr5 | 33092007 | 33092088 | 82 Carsat2    | orange | na      |
| chr5 | 33092342 | 33092834 | 493 Carsat2   | orange | na      |
| chr5 | 33093033 | 33093079 | 47 CarSat1    | red    | na      |
| chr5 | 33093104 | 33093586 | 483 Carsat2   | orange | na      |
| chr5 | 33100719 | 33100911 | 193 CarSat1   | red    | na      |
| chr5 | 33102937 | 33103252 | 316 Carsat2   | orange | na      |
| chr5 | 33105323 | 33105932 | 610 Sat2CF    | purple | na      |
| chr5 | 33105392 | 33106737 | 1346 Sat2CF   | purple | na      |
| chr5 | 33105562 | 33106863 | 1302 Sat2CF   | purple | na      |



|      |          |          |               |        |    |
|------|----------|----------|---------------|--------|----|
| chr5 | 33105914 | 33107174 | 1261 Sat2CF   | purple | na |
| chr5 | 33107081 | 33108386 | 1306 Sat2CF   | purple | na |
| chr5 | 33108345 | 33109611 | 1267 Sat2CF   | purple | na |
| chr5 | 33109697 | 33110949 | 1253 Sat2CF   | purple | na |
| chr5 | 33110960 | 33111082 | 123 Sat2CF    | purple | na |
| chr5 | 33111083 | 33112327 | 1245 Sat2CF   | purple | na |
| chr5 | 33112330 | 33112884 | 555 Sat2CF    | purple | na |
| chr5 | 33554451 | 33554705 | 255 Sat18CF   | na     | na |
| chr5 | 34076634 | 34076734 | 101 Sat72CF   | na     | na |
| chr5 | 34578651 | 34578818 | 168 Carsat3   | green  | na |
| chr5 | 34578851 | 34579748 | 898 Carsat3   | green  | na |
| chr5 | 34597176 | 34597415 | 240 Carsat3   | green  | na |
| chr5 | 35730591 | 35730992 | 402 CarSat1   | red    | na |
| chr5 | 36496178 | 36496574 | 397 Sat53CF   | na     | na |
| chr5 | 36496184 | 36496465 | 282 Sat21CF   | na     | na |
| chr5 | 36557292 | 36557361 | 70 Sat89CF    | na     | na |
| chr5 | 36812855 | 36813004 | 150 Sat43CF   | na     | na |
| chr5 | 37132279 | 37132374 | 96 SAT1_CF    | blue   | na |
| chr5 | 38967394 | 38967561 | 168 Sat60CF   | na     | na |
| chr5 | 39020625 | 39020831 | 207 Sat161CF  | na     | na |
| chr5 | 39020648 | 39021671 | 1024 Sat161CF | na     | na |
| chr5 | 39053782 | 39054168 | 387 Carsat3   | green  | na |
| chr5 | 39536976 | 39537023 | 48 Sat118CF   | na     | na |
| chr5 | 39943401 | 39943480 | 80 Sat10CF    | na     | na |
| chr5 | 40436888 | 40436937 | 50 Sat2CF     | purple | na |
| chr5 | 41161391 | 41161557 | 167 Sat17CF   | na     | na |
| chr5 | 42191159 | 42191288 | 130 Carsat3   | green  | na |
| chr5 | 42191334 | 42191462 | 129 Carsat3   | green  | na |
| chr5 | 42202690 | 42204109 | 1420 Carsat3  | green  | na |
| chr5 | 42244122 | 42245066 | 945 Carsat3   | green  | na |
| chr5 | 42276441 | 42276901 | 461 Carsat3   | green  | na |
| chr5 | 42276912 | 42277845 | 934 Carsat3   | green  | na |
| chr5 | 42278033 | 42278210 | 178 Carsat3   | green  | na |
| chr5 | 42278262 | 42278448 | 187 Carsat3   | green  | na |
| chr5 | 42320913 | 42322706 | 1794 Carsat3  | green  | na |
| chr5 | 42398606 | 42399877 | 1272 Carsat3  | green  | na |
| chr5 | 42412540 | 42412649 | 110 Carsat3   | green  | na |
| chr5 | 42412831 | 42412877 | 47 Carsat3    | green  | na |
| chr5 | 42413090 | 42413210 | 121 Carsat3   | green  | na |
| chr5 | 42413579 | 42413847 | 269 Carsat3   | green  | na |
| chr5 | 42534165 | 42534848 | 684 Sat17CF   | na     | na |
| chr5 | 44519507 | 44519593 | 87 Sat69CF    | na     | na |

|      |          |          |               |        |    |
|------|----------|----------|---------------|--------|----|
| chr5 | 44712034 | 44712093 | 60 SUBTEL_sa  | na     | na |
| chr5 | 45249743 | 45249790 | 48 Sat129CF   | na     | na |
| chr5 | 45888666 | 45888766 | 101 Carsat3   | green  | na |
| chr5 | 46244734 | 46244796 | 63 Sat32CF    | na     | na |
| chr5 | 50891269 | 50891496 | 228 Sat17CF   | na     | na |
| chr5 | 51387602 | 51388224 | 623 Sat44CF   | na     | na |
| chr5 | 53417388 | 53417443 | 56 Sat2CF     | purple | na |
| chr5 | 57579268 | 57579367 | 100 Sat5CF    | stalk  | na |
| chr5 | 59092110 | 59092318 | 209 SAT1_CF   | blue   | na |
| chr5 | 59262975 | 59263088 | 114 Sat16CF   | na     | na |
| chr5 | 60351913 | 60352106 | 194 Sat104CF  | na     | na |
| chr5 | 60553878 | 60554083 | 206 Sat5CF    | stalk  | na |
| chr5 | 60690262 | 60690332 | 71 Sat22CF    | na     | na |
| chr5 | 60749173 | 60749277 | 105 Sat5CF    | stalk  | na |
| chr5 | 60892561 | 60892609 | 49 Sat16CF    | na     | na |
| chr5 | 60968938 | 60969307 | 370 Sat72CF   | na     | na |
| chr5 | 60988760 | 60988887 | 128 Carsat3   | green  | na |
| chr5 | 61442217 | 61442254 | 38 Sat150CF   | na     | na |
| chr5 | 62110604 | 62111326 | 723 Sat65CF   | na     | na |
| chr5 | 62110626 | 62111547 | 922 Sat24CF   | na     | na |
| chr5 | 62982291 | 62982514 | 224 Sat166CF  | na     | na |
| chr5 | 63940929 | 63941139 | 211 Sat43CF   | na     | na |
| chr5 | 63947944 | 63948069 | 126 Sat180CF  | na     | na |
| chr5 | 63947996 | 63949115 | 1120 Sat180CF | na     | na |
| chr5 | 65273036 | 65273079 | 44 Sat63CF    | na     | na |
| chr5 | 66553210 | 66553474 | 265 Sat2CF    | purple | na |
| chr5 | 66553230 | 66553502 | 273 Sat2CF    | purple | na |
| chr5 | 66566318 | 66566775 | 458 Carsat3   | green  | na |
| chr5 | 67468584 | 67469117 | 534 Sat112CF  | na     | na |
| chr5 | 67468787 | 67470246 | 1460 Sat112CF | na     | na |
| chr5 | 67470204 | 67470251 | 48 Sat112CF   | na     | na |
| chr5 | 68136475 | 68137195 | 721 Sat60CF   | na     | na |
| chr5 | 69827318 | 69827438 | 121 Sat18CF   | na     | na |
| chr5 | 70473125 | 70474363 | 1239 Sat41CF  | na     | na |
| chr5 | 70501516 | 70501592 | 77 Sat9CF     | na     | na |
| chr5 | 73420956 | 73421009 | 54 Sat25CF    | na     | na |
| chr5 | 76273343 | 76273424 | 82 Sat58CF    | na     | na |
| chr5 | 76985756 | 76985947 | 192 Sat12CF   | na     | na |
| chr5 | 78548654 | 78549361 | 708 Carsat3   | green  | na |
| chr5 | 80253727 | 80255246 | 1520 Carsat3  | green  | na |
| chr5 | 80278287 | 80279070 | 784 Carsat3   | green  | na |
| chr5 | 80298666 | 80298832 | 167 Carsat3   | green  | na |

|      |          |          |      |          |        |         |
|------|----------|----------|------|----------|--------|---------|
| chr5 | 80307115 | 80307251 | 137  | Carsat3  | green  | na      |
| chr5 | 80307435 | 80307920 | 486  | Carsat3  | green  | na      |
| chr5 | 83997955 | 83998723 | 769  | Carsat3  | green  | na      |
| chr5 | 83998739 | 83999240 | 502  | Carsat3  | green  | na      |
| chr5 | 83999257 | 83999422 | 166  | Carsat3  | green  | na      |
| chr5 | 84615900 | 84615945 | 46   | Sat52CF  | na     | na      |
| chr5 | 84929457 | 84929539 | 83   | Sat110CF | na     | na      |
| chr5 | 84981437 | 84981567 | 131  | Sat5CF   | stalk  | na      |
| chr5 | 86044221 | 86044296 | 76   | CarSat1  | red    | na      |
| chr5 | 86248335 | 86248559 | 225  | Sat28CF  | na     | na      |
| chr5 | 87660125 | 87660447 | 323  | Sat119CF | na     | na      |
| chr5 | 87660160 | 87662369 | 2210 | Sat119CF | na     | na      |
| chr5 | 90615022 | 90615934 | 913  | Sat111CF | na     | na      |
| chr5 | 90992351 | 90992858 | 508  | Sat85CF  | na     | na      |
| chr5 | 91060107 | 91060203 | 97   | Sat101CF | na     | na      |
| chr5 | 91060120 | 91061524 | 1405 | Sat101CF | na     | na      |
| chr5 | 91061299 | 91061550 | 252  | Sat101CF | na     | na      |
| chr5 | 91975121 | 91975868 | 748  | Carsat2  | orange | na      |
| chr6 | 3000002  | 3001036  | 1035 | CarSat1  | red    | pericen |
| chr6 | 3001078  | 3001532  | 455  | CarSat1  | red    | pericen |
| chr6 | 3001548  | 3002511  | 964  | CarSat1  | red    | pericen |
| chr6 | 3002538  | 3003248  | 711  | CarSat1  | red    | pericen |
| chr6 | 3003275  | 3004723  | 1449 | CarSat1  | red    | pericen |
| chr6 | 3004750  | 3010352  | 5603 | CarSat1  | red    | pericen |
| chr6 | 3010377  | 3011834  | 1458 | CarSat1  | red    | pericen |
| chr6 | 3011850  | 3013288  | 1439 | CarSat1  | red    | pericen |
| chr6 | 3013321  | 3014026  | 706  | CarSat1  | red    | pericen |
| chr6 | 3014059  | 3014934  | 876  | CarSat1  | red    | pericen |
| chr6 | 3015130  | 3015843  | 714  | CarSat1  | red    | pericen |
| chr6 | 3024488  | 3025079  | 592  | CarSat1  | red    | pericen |
| chr6 | 3025275  | 3026375  | 1101 | CarSat1  | red    | pericen |
| chr6 | 3026409  | 3026554  | 146  | CarSat1  | red    | pericen |
| chr6 | 3026930  | 3027203  | 274  | CarSat1  | red    | pericen |
| chr6 | 3033240  | 3033617  | 378  | Sat2CF   | purple | pericen |
| chr6 | 3033300  | 3034161  | 862  | Sat2CF   | purple | pericen |
| chr6 | 3033301  | 3034267  | 967  | Sat2CF   | purple | pericen |
| chr6 | 3034476  | 3035852  | 1377 | SAT1_CF  | blue   | pericen |
| chr6 | 3035881  | 3036283  | 403  | CarSat1  | red    | pericen |
| chr6 | 3036302  | 3036995  | 694  | CarSat1  | red    | pericen |
| chr6 | 3037181  | 3038023  | 843  | CarSat1  | red    | pericen |
| chr6 | 3038041  | 3038724  | 684  | CarSat1  | red    | pericen |
| chr6 | 3055079  | 3055878  | 800  | Sat2CF   | purple | pericen |

|      |          |          |               |        |         |
|------|----------|----------|---------------|--------|---------|
| chr6 | 3068425  | 3069676  | 1252 Sat2CF   | purple | pericen |
| chr6 | 3068555  | 3069640  | 1086 Sat2CF   | purple | pericen |
| chr6 | 3072557  | 3073302  | 746 CarSat1   | red    | pericen |
| chr6 | 3073320  | 3074095  | 776 CarSat1   | red    | pericen |
| chr6 | 3074122  | 3074965  | 844 CarSat1   | red    | pericen |
| chr6 | 3075163  | 3075828  | 666 CarSat1   | red    | pericen |
| chr6 | 3085088  | 3085360  | 273 Carsat2   | orange | pericen |
| chr6 | 3085116  | 3085771  | 656 CarSat1   | red    | pericen |
| chr6 | 3085789  | 3086631  | 843 CarSat1   | red    | pericen |
| chr6 | 3086818  | 3086960  | 143 CarSat1   | red    | pericen |
| chr6 | 3090843  | 3090989  | 147 Sat2CF    | purple | pericen |
| chr6 | 3090865  | 3091941  | 1077 Sat2CF   | purple | pericen |
| chr6 | 3173219  | 3173932  | 714 Sat2CF    | purple | pericen |
| chr6 | 3173799  | 3173960  | 162 Sat2CF    | purple | pericen |
| chr6 | 3273299  | 3274319  | 1021 SAT1_CF  | blue   | pericen |
| chr6 | 3274335  | 3277392  | 3058 SAT1_CF  | blue   | pericen |
| chr6 | 3277422  | 3277821  | 400 SAT1_CF   | blue   | pericen |
| chr6 | 3277819  | 3279888  | 2070 CarSat1  | red    | pericen |
| chr6 | 3279906  | 3281832  | 1927 CarSat1  | red    | pericen |
| chr6 | 3281852  | 3282468  | 617 CarSat1   | red    | pericen |
| chr6 | 3282878  | 3283006  | 129 CarSat1   | red    | pericen |
| chr6 | 3283192  | 3284211  | 1020 CarSat1  | red    | pericen |
| chr6 | 3284393  | 3285135  | 743 CarSat1   | red    | pericen |
| chr6 | 3285160  | 3285298  | 139 CarSat1   | red    | pericen |
| chr6 | 3360453  | 3360998  | 546 Carsat3   | green  | pericen |
| chr6 | 3361153  | 3361237  | 85 Carsat3    | green  | pericen |
| chr6 | 8202675  | 8202768  | 94 Sat104CF   | na     | na      |
| chr6 | 8757646  | 8757891  | 246 Carsat2   | orange | na      |
| chr6 | 9313802  | 9313875  | 74 Sat96CF    | na     | na      |
| chr6 | 9383155  | 9383364  | 210 Sat12CF   | na     | na      |
| chr6 | 10824341 | 10824743 | 403 CarSat1   | red    | na      |
| chr6 | 11611685 | 11611980 | 296 Carsat3   | green  | na      |
| chr6 | 11628381 | 11628560 | 180 CarSat1   | red    | na      |
| chr6 | 11812622 | 11814753 | 2132 Sat62CF  | na     | na      |
| chr6 | 11814754 | 11818479 | 3726 Sat62CF  | na     | na      |
| chr6 | 11818493 | 11818612 | 120 Sat62CF   | na     | na      |
| chr6 | 11842185 | 11845260 | 3076 Sat115CF | na     | na      |
| chr6 | 11842747 | 11846220 | 3474 Sat115CF | na     | na      |
| chr6 | 11846280 | 11847122 | 843 Sat115CF  | na     | na      |
| chr6 | 11847140 | 11847264 | 125 Sat115CF  | na     | na      |
| chr6 | 12515725 | 12516259 | 535 Carsat3   | green  | na      |
| chr6 | 12516276 | 12516413 | 138 Carsat3   | green  | na      |

|      |          |          |              |        |    |
|------|----------|----------|--------------|--------|----|
| chr6 | 12531703 | 12532549 | 847 Carsat3  | green  | na |
| chr6 | 12546759 | 12547352 | 594 Carsat3  | green  | na |
| chr6 | 12573296 | 12573437 | 142 Carsat3  | green  | na |
| chr6 | 12576471 | 12577050 | 580 Carsat3  | green  | na |
| chr6 | 12942585 | 12942963 | 379 Carsat3  | green  | na |
| chr6 | 12977838 | 12978083 | 246 Carsat3  | green  | na |
| chr6 | 12978098 | 12978883 | 786 Carsat3  | green  | na |
| chr6 | 12993121 | 12993976 | 856 Carsat3  | green  | na |
| chr6 | 12993987 | 12994479 | 493 Carsat3  | green  | na |
| chr6 | 12994584 | 12994674 | 91 Carsat3   | green  | na |
| chr6 | 13021909 | 13022018 | 110 Carsat3  | green  | na |
| chr6 | 13022278 | 13022656 | 379 Carsat3  | green  | na |
| chr6 | 13022705 | 13023175 | 471 Carsat3  | green  | na |
| chr6 | 13025736 | 13026088 | 353 Carsat3  | green  | na |
| chr6 | 13057399 | 13057974 | 576 Carsat3  | green  | na |
| chr6 | 13064633 | 13065366 | 734 Carsat3  | green  | na |
| chr6 | 13099627 | 13099769 | 143 Carsat2  | orange | na |
| chr6 | 13102210 | 13103216 | 1007 Carsat3 | green  | na |
| chr6 | 13634604 | 13634719 | 116 Carsat3  | green  | na |
| chr6 | 13698673 | 13698729 | 57 Sat10CF   | na     | na |
| chr6 | 15033092 | 15033306 | 215 Carsat3  | green  | na |
| chr6 | 15033422 | 15035588 | 2167 Carsat3 | green  | na |
| chr6 | 15047604 | 15047830 | 227 Carsat3  | green  | na |
| chr6 | 15047844 | 15049216 | 1373 Carsat3 | green  | na |
| chr6 | 15102687 | 15103761 | 1075 Carsat3 | green  | na |
| chr6 | 15103773 | 15104332 | 560 Carsat3  | green  | na |
| chr6 | 15104385 | 15104541 | 157 Carsat3  | green  | na |
| chr6 | 15136636 | 15136998 | 363 Carsat3  | green  | na |
| chr6 | 16226943 | 16227183 | 241 Sat84CF  | na     | na |
| chr6 | 17622686 | 17622798 | 113 Sat5CF   | stalk  | na |
| chr6 | 17624130 | 17624624 | 495 Sat57CF  | na     | na |
| chr6 | 18552206 | 18552400 | 195 Sat70CF  | na     | na |
| chr6 | 19636141 | 19636874 | 734 Sat2CF   | purple | na |
| chr6 | 19636718 | 19636894 | 177 Sat2CF   | purple | na |
| chr6 | 19798345 | 19798459 | 115 Carsat3  | green  | na |
| chr6 | 20404065 | 20404555 | 491 Carsat3  | green  | na |
| chr6 | 20404977 | 20405196 | 220 Carsat3  | green  | na |
| chr6 | 20601270 | 20601390 | 121 Carsat3  | green  | na |
| chr6 | 20608446 | 20608851 | 406 Sat42CF  | na     | na |
| chr6 | 20609785 | 20609960 | 176 Carsat3  | green  | na |
| chr6 | 20647834 | 20648260 | 427 Carsat3  | green  | na |
| chr6 | 20648318 | 20648379 | 62 Carsat3   | green  | na |

|      |          |          |               |        |    |
|------|----------|----------|---------------|--------|----|
| chr6 | 20716538 | 20716640 | 103 Carsat3   | green  | na |
| chr6 | 20716721 | 20716885 | 165 Carsat3   | green  | na |
| chr6 | 20944061 | 20944395 | 335 Sat19CF   | na     | na |
| chr6 | 20951784 | 20951857 | 74 CarSat1    | red    | na |
| chr6 | 22305765 | 22305889 | 125 Sat5CF    | stalk  | na |
| chr6 | 23837740 | 23837814 | 75 Sat179CF   | na     | na |
| chr6 | 23992055 | 23992355 | 301 Carsat3   | green  | na |
| chr6 | 25585395 | 25585716 | 322 Carsat2   | orange | na |
| chr6 | 34590118 | 34590481 | 364 Sat28CF   | na     | na |
| chr6 | 34835010 | 34835264 | 255 Sat12CF   | na     | na |
| chr6 | 34835078 | 34835258 | 181 Sat12CF   | na     | na |
| chr6 | 35378354 | 35378413 | 60 Sat165CF   | na     | na |
| chr6 | 35516691 | 35516741 | 51 Sat45CF    | na     | na |
| chr6 | 35516699 | 35520853 | 4155 Sat45CF  | na     | na |
| chr6 | 35520912 | 35523575 | 2664 Sat45CF  | na     | na |
| chr6 | 36523217 | 36523462 | 246 Sat85CF   | na     | na |
| chr6 | 36523463 | 36525338 | 1876 Sat85CF  | na     | na |
| chr6 | 36525334 | 36525598 | 265 Sat85CF   | na     | na |
| chr6 | 36525635 | 36525793 | 159 Sat85CF   | na     | na |
| chr6 | 36525796 | 36527672 | 1877 Sat85CF  | na     | na |
| chr6 | 36527673 | 36527749 | 77 Sat85CF    | na     | na |
| chr6 | 36570023 | 36570097 | 75 Sat126CF   | na     | na |
| chr6 | 39703439 | 39703687 | 249 Carsat3   | green  | na |
| chr6 | 40839330 | 40839607 | 278 Carsat3   | green  | na |
| chr6 | 40839636 | 40839724 | 89 Carsat3    | green  | na |
| chr6 | 40839876 | 40840110 | 235 Carsat3   | green  | na |
| chr6 | 40863562 | 40863827 | 266 Carsat3   | green  | na |
| chr6 | 40880041 | 40880316 | 276 Carsat3   | green  | na |
| chr6 | 40963221 | 40963648 | 428 Carsat3   | green  | na |
| chr6 | 40984374 | 40985150 | 777 Carsat3   | green  | na |
| chr6 | 41042419 | 41042699 | 281 Carsat3   | green  | na |
| chr6 | 41127000 | 41127162 | 163 Carsat3   | green  | na |
| chr6 | 41127419 | 41127581 | 163 Carsat3   | green  | na |
| chr6 | 41783943 | 41784007 | 65 Sat89CF    | na     | na |
| chr6 | 42134939 | 42136364 | 1426 Sat117CF | na     | na |
| chr6 | 42148750 | 42148823 | 74 Sat107CF   | na     | na |
| chr6 | 42212458 | 42213526 | 1069 Sat159CF | na     | na |
| chr6 | 42566330 | 42566684 | 355 Sat5CF    | stalk  | na |
| chr6 | 42903984 | 42904206 | 223 SAT1_CF   | blue   | na |
| chr6 | 43314588 | 43314805 | 218 Sat30CF   | na     | na |
| chr6 | 43494570 | 43494616 | 47 Sat114CF   | na     | na |
| chr6 | 43504082 | 43504272 | 191 Sat2CF    | purple | na |

|      |          |          |               |        |    |
|------|----------|----------|---------------|--------|----|
| chr6 | 43531062 | 43532425 | 1364 SAT1_CF  | blue   | na |
| chr6 | 43537080 | 43537406 | 327 Sat2CF    | purple | na |
| chr6 | 43537112 | 43537402 | 291 Sat2CF    | purple | na |
| chr6 | 43639399 | 43640269 | 871 Sat2CF    | purple | na |
| chr6 | 43639462 | 43640241 | 780 Sat2CF    | purple | na |
| chr6 | 43643039 | 43644121 | 1083 SAT1_CF  | blue   | na |
| chr6 | 43644166 | 43646491 | 2326 SAT1_CF  | blue   | na |
| chr6 | 43646502 | 43647425 | 924 SAT1_CF   | blue   | na |
| chr6 | 43647442 | 43647698 | 257 SAT1_CF   | blue   | na |
| chr6 | 43647726 | 43649397 | 1672 SAT1_CF  | blue   | na |
| chr6 | 43649427 | 43650887 | 1461 CarSat1  | red    | na |
| chr6 | 43650903 | 43651042 | 140 CarSat1   | red    | na |
| chr6 | 43651063 | 43651155 | 93 CarSat1    | red    | na |
| chr6 | 43651221 | 43651362 | 142 CarSat1   | red    | na |
| chr6 | 43651389 | 43651518 | 130 CarSat1   | red    | na |
| chr6 | 43651536 | 43652480 | 945 CarSat1   | red    | na |
| chr6 | 43652589 | 43654525 | 1937 CarSat1  | red    | na |
| chr6 | 43655007 | 43655194 | 188 CarSat1   | red    | na |
| chr6 | 43657275 | 43660479 | 3205 CarSat1  | red    | na |
| chr6 | 44375564 | 44375625 | 62 Sat30CF    | na     | na |
| chr6 | 44549617 | 44550191 | 575 CarSat1   | red    | na |
| chr6 | 44576283 | 44576449 | 167 Sat50CF   | na     | na |
| chr6 | 44781782 | 44783644 | 1863 Sat51CF  | na     | na |
| chr6 | 44918820 | 44918959 | 140 Sat4CF    | lred   | na |
| chr6 | 45205112 | 45206270 | 1159 Sat104CF | na     | na |
| chr6 | 47787190 | 47787356 | 167 Sat17CF   | na     | na |
| chr6 | 49188173 | 49188517 | 345 Sat17CF   | na     | na |
| chr6 | 51908598 | 51909097 | 500 Sat44CF   | na     | na |
| chr6 | 53084252 | 53084795 | 544 Sat37CF   | na     | na |
| chr6 | 53504119 | 53504214 | 96 Sat18CF    | na     | na |
| chr6 | 56003751 | 56003879 | 129 SUBTEL_sa | na     | na |
| chr6 | 58506860 | 58507061 | 202 Sat51CF   | na     | na |
| chr6 | 58506918 | 58507070 | 153 Sat51CF   | na     | na |
| chr6 | 59538799 | 59538946 | 148 Carsat3   | green  | na |
| chr6 | 60638277 | 60638319 | 43 Sat89CF    | na     | na |
| chr6 | 61884793 | 61884843 | 51 Sat63CF    | na     | na |
| chr6 | 64169460 | 64169860 | 401 Sat141CF  | na     | na |
| chr6 | 64440492 | 64440821 | 330 Sat19CF   | na     | na |
| chr6 | 64531309 | 64531593 | 285 CarSat1   | red    | na |
| chr6 | 64579330 | 64579390 | 61 Sat32CF    | na     | na |
| chr6 | 66068736 | 66068817 | 82 Sat19CF    | na     | na |
| chr6 | 69024880 | 69024925 | 46 Sat7CF     | lime   | na |

|      |          |          |               |        |         |
|------|----------|----------|---------------|--------|---------|
| chr6 | 69337802 | 69337861 | 60 Sat126CF   | na     | na      |
| chr6 | 69649512 | 69649558 | 47 Sat51CF    | na     | na      |
| chr6 | 72368560 | 72369083 | 524 Sat125CF  | na     | na      |
| chr6 | 72368561 | 72368961 | 401 Sat125CF  | na     | na      |
| chr6 | 73019795 | 73020109 | 315 Sat18CF   | na     | na      |
| chr6 | 75303509 | 75303554 | 46 Sat36CF    | na     | na      |
| chr6 | 75616579 | 75616614 | 36 Sat41CF    | na     | na      |
| chr6 | 79134813 | 79135439 | 627 Sat19CF   | na     | na      |
| chr6 | 79967448 | 79968138 | 691 Sat100CF  | na     | na      |
| chr6 | 79967549 | 79969458 | 1910 Sat100CF | na     | na      |
| chr6 | 79969397 | 79969466 | 70 Sat100CF   | na     | na      |
| chr6 | 80639978 | 80641043 | 1066 SAT1_CF  | blue   | na      |
| chr7 | 3516351  | 3516425  | 75 Sat128CF   | na     | pericen |
| chr7 | 3898522  | 3898991  | 470 Sat19CF   | na     | pericen |
| chr7 | 3946701  | 3947084  | 384 Sat114CF  | na     | pericen |
| chr7 | 4278502  | 4278589  | 88 SUBTEL_sa  | na     | pericen |
| chr7 | 5263763  | 5263880  | 118 Sat17CF   | na     | na      |
| chr7 | 5525199  | 5525284  | 86 SAT1_CF    | blue   | na      |
| chr7 | 5926427  | 5926539  | 113 Sat80CF   | na     | na      |
| chr7 | 6071680  | 6072813  | 1134 Sat119CF | na     | na      |
| chr7 | 6071818  | 6072813  | 996 Sat79CF   | na     | na      |
| chr7 | 7375720  | 7375821  | 102 Sat43CF   | na     | na      |
| chr7 | 7497487  | 7497863  | 377 Sat24CF   | na     | na      |
| chr7 | 7963635  | 7963992  | 358 CarSat1   | red    | na      |
| chr7 | 8453308  | 8453411  | 104 Sat89CF   | na     | na      |
| chr7 | 8822109  | 8822160  | 52 Sat55CF    | na     | na      |
| chr7 | 9810516  | 9810606  | 91 Sat56CF    | na     | na      |
| chr7 | 11222115 | 11222486 | 372 Sat12CF   | na     | na      |
| chr7 | 11222328 | 11222487 | 160 Sat12CF   | na     | na      |
| chr7 | 11868612 | 11868749 | 138 Sat12CF   | na     | na      |
| chr7 | 14706802 | 14706895 | 94 Sat9CF     | na     | na      |
| chr7 | 16365777 | 16365857 | 81 Sat150CF   | na     | na      |
| chr7 | 18431083 | 18431183 | 101 Carsat3   | green  | na      |
| chr7 | 18644166 | 18644217 | 52 Sat58CF    | na     | na      |
| chr7 | 23943804 | 23944038 | 235 Carsat3   | green  | na      |
| chr7 | 30594477 | 30594550 | 74 Sat165CF   | na     | na      |
| chr7 | 36204606 | 36205533 | 928 Sat43CF   | na     | na      |
| chr7 | 38412381 | 38412485 | 105 Carsat2   | orange | na      |
| chr7 | 38728498 | 38728811 | 314 Sat97CF   | na     | na      |
| chr7 | 42281429 | 42281529 | 101 Sat60CF   | na     | na      |
| chr7 | 44285623 | 44285672 | 50 Sat9CF     | na     | na      |
| chr7 | 45313729 | 45314104 | 376 Sat134CF  | na     | na      |



|      |          |          |               |        |         |
|------|----------|----------|---------------|--------|---------|
| chr7 | 45313772 | 45315071 | 1300 Sat134CF | na     | na      |
| chr7 | 45313952 | 45315210 | 1259 Sat134CF | na     | na      |
| chr7 | 45315131 | 45315232 | 102 Sat134CF  | na     | na      |
| chr7 | 45949264 | 45949300 | 37 Sat36CF    | na     | na      |
| chr7 | 46085938 | 46086166 | 229 Sat17CF   | na     | na      |
| chr7 | 46511593 | 46511658 | 66 Sat12CF    | na     | na      |
| chr7 | 46569291 | 46569637 | 347 Sat2CF    | purple | na      |
| chr7 | 46875475 | 46875525 | 51 Sat55CF    | na     | na      |
| chr7 | 47844712 | 47844859 | 148 Sat172CF  | na     | na      |
| chr7 | 51616045 | 51616232 | 188 Sat60CF   | na     | na      |
| chr7 | 53875173 | 53875242 | 70 Sat67CF    | na     | na      |
| chr7 | 57653025 | 57653314 | 290 Carsat3   | green  | na      |
| chr7 | 57677955 | 57678334 | 380 Carsat3   | green  | na      |
| chr7 | 57697044 | 57698868 | 1825 Carsat3  | green  | na      |
| chr7 | 57726804 | 57727452 | 649 Carsat3   | green  | na      |
| chr7 | 57733297 | 57734147 | 851 Carsat3   | green  | na      |
| chr7 | 59480431 | 59480486 | 56 Sat92CF    | na     | na      |
| chr7 | 62208443 | 62208506 | 64 Carsat3    | green  | na      |
| chr7 | 65379680 | 65380004 | 325 CarSat1   | red    | na      |
| chr7 | 67742511 | 67742566 | 56 Sat59CF    | na     | na      |
| chr7 | 74724862 | 74725017 | 156 Carsat3   | green  | na      |
| chr7 | 80568468 | 80568629 | 162 Sat19CF   | na     | na      |
| chr7 | 81599056 | 81599285 | 230 Carsat2   | orange | na      |
| chr7 | 81607574 | 81608030 | 457 Carsat2   | orange | na      |
| chr7 | 81608331 | 81609817 | 1487 Carsat2  | orange | na      |
| chr7 | 81611639 | 81611803 | 165 Carsat2   | orange | na      |
| chr7 | 81612051 | 81612190 | 140 Carsat2   | orange | na      |
| chr7 | 81614757 | 81615126 | 370 Carsat2   | orange | na      |
| chr7 | 82835159 | 82835240 | 82 Sat63CF    | na     | na      |
| chr7 | 83597104 | 83597649 | 546 Carsat2   | orange | na      |
| chr7 | 83917838 | 83921472 | 3635 Carsat2  | orange | na      |
| chr7 | 83921385 | 83921541 | 157 CarSat1   | red    | na      |
| chr7 | 83921736 | 83922491 | 756 CarSat1   | red    | na      |
| chr8 | 3015729  | 3015884  | 156 CarSat1   | red    | pericen |
| chr8 | 3198231  | 3198406  | 176 Sat18CF   | na     | pericen |
| chr8 | 3198248  | 3198433  | 186 Sat21CF   | na     | pericen |
| chr8 | 3198257  | 3198489  | 233 Sat21CF   | na     | pericen |
| chr8 | 3372569  | 3372900  | 332 Carsat2   | orange | pericen |
| chr8 | 3751311  | 3752416  | 1106 Carsat2  | orange | pericen |
| chr8 | 3759741  | 3760264  | 524 Carsat2   | orange | pericen |
| chr8 | 3760279  | 3760683  | 405 Carsat2   | orange | pericen |
| chr8 | 3760735  | 3763535  | 2801 Carsat2  | orange | pericen |

|      |          |          |      |          |           |         |
|------|----------|----------|------|----------|-----------|---------|
| chr8 | 3763651  | 3764070  | 420  | Carsat2  | orange    | pericen |
| chr8 | 3764200  | 3767497  | 3298 | Carsat2  | orange    | pericen |
| chr8 | 3767535  | 3768094  | 560  | Carsat2  | orange    | pericen |
| chr8 | 3768108  | 3769476  | 1369 | Carsat2  | orange    | pericen |
| chr8 | 5157634  | 5158387  | 754  | Carsat2  | orange    | na      |
| chr8 | 6048853  | 6050262  | 1410 | SAT1_CF  | blue      | na      |
| chr8 | 7385210  | 7385484  | 275  | Sat47CF  | na        | na      |
| chr8 | 8270693  | 8270896  | 204  | Sat17CF  | na        | na      |
| chr8 | 14277193 | 14277421 | 229  | Carsat3  | green     | na      |
| chr8 | 18166358 | 18166392 | 35   | Sat62CF  | na        | na      |
| chr8 | 20608837 | 20608881 | 45   | Sat76CF  | na        | na      |
| chr8 | 28565308 | 28565385 | 78   | Sat32CF  | na        | na      |
| chr8 | 30738944 | 30739035 | 92   | Sat36CF  | na        | na      |
| chr8 | 33708674 | 33708712 | 39   | Sat21CF  | na        | na      |
| chr8 | 41445609 | 41445660 | 52   | Sat32CF  | na        | na      |
| chr8 | 43873579 | 43873718 | 140  | Carsat3  | green     | na      |
| chr8 | 45057128 | 45057463 | 336  | Carsat3  | green     | na      |
| chr8 | 45844753 | 45844828 | 76   | Sat89CF  | na        | na      |
| chr8 | 51127613 | 51127778 | 166  | Sat13CF  | na        | na      |
| chr8 | 56697132 | 56697184 | 53   | Sat179CF | na        | na      |
| chr8 | 58670603 | 58670708 | 106  | Sat30CF  | na        | na      |
| chr8 | 58842480 | 58842779 | 300  | Carsat3  | green     | na      |
| chr8 | 64052703 | 64052868 | 166  | Carsat3  | green     | na      |
| chr8 | 64053060 | 64053172 | 113  | Carsat3  | green     | na      |
| chr8 | 64053212 | 64053414 | 203  | Carsat3  | green     | na      |
| chr8 | 64513666 | 64513722 | 57   | Sat46CF  | na        | na      |
| chr8 | 65418180 | 65419268 | 1089 | Carsat2  | orange    | na      |
| chr8 | 65488531 | 65488589 | 59   | Sat22CF  | na        | na      |
| chr8 | 65715941 | 65716054 | 114  | Carsat3  | green     | na      |
| chr8 | 65716076 | 65716359 | 284  | Carsat3  | green     | na      |
| chr8 | 66053147 | 66053748 | 602  | Sat3CF   | optpurple | na      |
| chr8 | 66485324 | 66485556 | 233  | Sat17CF  | na        | na      |
| chr8 | 66814663 | 66814859 | 197  | Sat72CF  | na        | na      |
| chr8 | 69749419 | 69749568 | 150  | Sat14CF  | na        | na      |
| chr8 | 70660711 | 70661262 | 552  | CarSat1  | red       | na      |
| chr8 | 72130594 | 72131685 | 1092 | Sat76CF  | na        | na      |
| chr8 | 72130723 | 72131904 | 1182 | Sat76CF  | na        | na      |
| chr8 | 72131783 | 72131926 | 144  | Sat76CF  | na        | na      |
| chr8 | 74130113 | 74130165 | 53   | Sat130CF | na        | na      |
| chr8 | 74848414 | 74849085 | 672  | Sat42CF  | na        | na      |
| chr8 | 74983803 | 74984238 | 436  | Sat4CF   | lred      | na      |
| chr8 | 75015775 | 75016067 | 293  | CarSat1  | red       | na      |

|      |          |          |               |       |         |
|------|----------|----------|---------------|-------|---------|
| chr8 | 75021816 | 75022226 | 411 Sat79CF   | na    | na      |
| chr8 | 75189660 | 75190036 | 377 CarSat1   | red   | na      |
| chr8 | 75321989 | 75322156 | 168 Sat5CF    | stalk | na      |
| chr8 | 75397369 | 75397592 | 224 Sat21CF   | na    | na      |
| chr8 | 75468169 | 75470438 | 2270 Sat40CF  | na    | na      |
| chr8 | 75469219 | 75471346 | 2128 Sat40CF  | na    | na      |
| chr8 | 75529412 | 75529674 | 263 Sat74CF   | na    | na      |
| chr8 | 75554476 | 75554563 | 88 Sat13CF    | na    | na      |
| chr8 | 75742227 | 75742412 | 186 Sat38CF   | na    | na      |
| chr8 | 75885469 | 75885568 | 100 Sat60CF   | na    | na      |
| chr8 | 75887579 | 75887667 | 89 Sat5CF     | stalk | na      |
| chr8 | 75888170 | 75888192 | 23 Sat60CF    | na    | na      |
| chr8 | 75888491 | 75888629 | 139 Sat60CF   | na    | na      |
| chr8 | 75889125 | 75889162 | 38 Sat5CF     | stalk | na      |
| chr8 | 75903481 | 75904641 | 1161 Sat38CF  | na    | na      |
| chr8 | 76335937 | 76336699 | 763 Carsat3   | green | na      |
| chr8 | 76652681 | 76652910 | 230 CarSat1   | red   | na      |
| chr8 | 76907728 | 76907973 | 246 CarSat1   | red   | na      |
| chr9 | 3008904  | 3009312  | 409 Sat28CF   | na    | pericen |
| chr9 | 3008942  | 3009340  | 399 Sat118CF  | na    | pericen |
| chr9 | 3009341  | 3010457  | 1117 Sat118CF | na    | pericen |
| chr9 | 3010084  | 3010501  | 418 Sat21CF   | na    | pericen |
| chr9 | 3010429  | 3010520  | 92 Sat28CF    | na    | pericen |
| chr9 | 3010459  | 3010510  | 52 Sat118CF   | na    | pericen |
| chr9 | 3521978  | 3522166  | 189 CarSat1   | red   | pericen |
| chr9 | 4764509  | 4764661  | 153 Sat176CF  | na    | pericen |
| chr9 | 4858043  | 4858641  | 599 Sat93CF   | na    | pericen |
| chr9 | 4871292  | 4871508  | 217 Sat17CF   | na    | pericen |
| chr9 | 4964052  | 4964088  | 37 Sat102CF   | na    | pericen |
| chr9 | 5080890  | 5080911  | 22 Sat16CF    | na    | na      |
| chr9 | 5081005  | 5081033  | 29 Sat16CF    | na    | na      |
| chr9 | 5126305  | 5126456  | 152 Sat172CF  | na    | na      |
| chr9 | 5126328  | 5127697  | 1370 Sat172CF | na    | na      |
| chr9 | 5337566  | 5337692  | 127 Sat87CF   | na    | na      |
| chr9 | 6530281  | 6530364  | 84 Sat18CF    | na    | na      |
| chr9 | 6570854  | 6571400  | 547 Sat43CF   | na    | na      |
| chr9 | 6912175  | 6912275  | 101 Sat34CF   | na    | na      |
| chr9 | 9174164  | 9174418  | 255 Sat13CF   | na    | na      |
| chr9 | 9611589  | 9612121  | 533 SAT1_CF   | blue  | na      |
| chr9 | 9713730  | 9713876  | 147 Sat182CF  | na    | na      |
| chr9 | 9833068  | 9833343  | 276 Sat135CF  | na    | na      |
| chr9 | 12771507 | 12771552 | 46 Sat155CF   | na    | na      |

|      |          |          |              |        |    |
|------|----------|----------|--------------|--------|----|
| chr9 | 13367589 | 13368052 | 464 Sat10CF  | na     | na |
| chr9 | 13367636 | 13368806 | 1171 Sat10CF | na     | na |
| chr9 | 13367744 | 13368052 | 309 Sat10CF  | na     | na |
| chr9 | 13367805 | 13368855 | 1051 Sat10CF | na     | na |
| chr9 | 13367589 | 13368052 | 464 Sat10CF  | na     | na |
| chr9 | 13368468 | 13369182 | 715 Sat10CF  | na     | na |
| chr9 | 13368468 | 13369182 | 715 Sat10CF  | na     | na |
| chr9 | 14343589 | 14343703 | 115 Carsat3  | green  | na |
| chr9 | 14343788 | 14344098 | 311 Carsat3  | green  | na |
| chr9 | 14344294 | 14344419 | 126 Carsat3  | green  | na |
| chr9 | 20064758 | 20064798 | 41 Sat56CF   | na     | na |
| chr9 | 21273313 | 21274329 | 1017 Sat10CF | na     | na |
| chr9 | 21312852 | 21314096 | 1245 Sat10CF | na     | na |
| chr9 | 21313614 | 21314560 | 947 Sat10CF  | na     | na |
| chr9 | 21313712 | 21314729 | 1018 Sat10CF | na     | na |
| chr9 | 21314947 | 21315554 | 608 Sat10CF  | na     | na |
| chr9 | 21315223 | 21315567 | 345 Sat10CF  | na     | na |
| chr9 | 21315311 | 21315554 | 244 Sat10CF  | na     | na |
| chr9 | 21341782 | 21342140 | 359 Sat10CF  | na     | na |
| chr9 | 21341795 | 21342402 | 608 Sat10CF  | na     | na |
| chr9 | 21342789 | 21343839 | 1051 Sat10CF | na     | na |
| chr9 | 21343452 | 21344166 | 715 Sat10CF  | na     | na |
| chr9 | 21849859 | 21849983 | 125 Sat12CF  | na     | na |
| chr9 | 22179293 | 22179354 | 62 Sat12CF   | na     | na |
| chr9 | 23697424 | 23697468 | 45 Sat8CF    | dgreen | na |
| chr9 | 24478482 | 24478559 | 78 Sat12CF   | na     | na |
| chr9 | 24480183 | 24480424 | 242 Sat12CF  | na     | na |
| chr9 | 24480325 | 24480531 | 207 Sat12CF  | na     | na |
| chr9 | 24523162 | 24523297 | 136 Sat12CF  | na     | na |
| chr9 | 25480578 | 25480669 | 92 Sat137CF  | na     | na |
| chr9 | 25485115 | 25485408 | 294 Sat12CF  | na     | na |
| chr9 | 25698038 | 25698104 | 67 Sat118CF  | na     | na |
| chr9 | 26173742 | 26174160 | 419 CarSat1  | red    | na |
| chr9 | 27016125 | 27016512 | 388 Sat12CF  | na     | na |
| chr9 | 27043013 | 27043096 | 84 Sat12CF   | na     | na |
| chr9 | 27063853 | 27064062 | 210 Sat12CF  | na     | na |
| chr9 | 27063947 | 27064062 | 116 Sat12CF  | na     | na |
| chr9 | 28761674 | 28761792 | 119 Carsat3  | green  | na |
| chr9 | 28830110 | 28830213 | 104 Carsat3  | green  | na |
| chr9 | 28830268 | 28830426 | 159 Carsat3  | green  | na |
| chr9 | 28843504 | 28843571 | 68 Sat27CF   | na     | na |
| chr9 | 28955809 | 28955888 | 80 Sat12CF   | na     | na |

|      |          |          |               |        |    |
|------|----------|----------|---------------|--------|----|
| chr9 | 28955819 | 28955888 | 70 Sat12CF    | na     | na |
| chr9 | 29272748 | 29272801 | 54 Sat133CF   | na     | na |
| chr9 | 29332453 | 29332543 | 91 Sat12CF    | na     | na |
| chr9 | 29455013 | 29455125 | 113 Sat12CF   | na     | na |
| chr9 | 29465725 | 29466115 | 391 Sat12CF   | na     | na |
| chr9 | 35284804 | 35284877 | 74 Sat113CF   | na     | na |
| chr9 | 35686121 | 35686191 | 71 Sat13CF    | na     | na |
| chr9 | 36291234 | 36291440 | 207 CarSat1   | red    | na |
| chr9 | 39394743 | 39394809 | 67 Sat118CF   | na     | na |
| chr9 | 39886024 | 39886307 | 284 Sat12CF   | na     | na |
| chr9 | 39886038 | 39886341 | 304 Sat12CF   | na     | na |
| chr9 | 39888521 | 39888588 | 68 Sat16CF    | na     | na |
| chr9 | 39939594 | 39939898 | 305 Sat12CF   | na     | na |
| chr9 | 39939646 | 39939878 | 233 Sat12CF   | na     | na |
| chr9 | 41917670 | 41917886 | 217 Sat12CF   | na     | na |
| chr9 | 41945443 | 41945630 | 188 Sat12CF   | na     | na |
| chr9 | 42032757 | 42032896 | 140 Sat12CF   | na     | na |
| chr9 | 42032789 | 42032897 | 109 Sat12CF   | na     | na |
| chr9 | 42070415 | 42070495 | 81 Sat165CF   | na     | na |
| chr9 | 45688271 | 45688334 | 64 Carsat3    | green  | na |
| chr9 | 46253001 | 46253200 | 200 Sat12CF   | na     | na |
| chr9 | 46253058 | 46253292 | 235 Sat12CF   | na     | na |
| chr9 | 46829223 | 46829278 | 56 Sat95CF    | na     | na |
| chr9 | 47959434 | 47959592 | 159 SUBTEL_sa | na     | na |
| chr9 | 49684301 | 49684523 | 223 Sat17CF   | na     | na |
| chr9 | 50098702 | 50098773 | 72 Sat157CF   | na     | na |
| chr9 | 51032313 | 51032726 | 414 Sat14CF   | na     | na |
| chr9 | 51032314 | 51032658 | 345 Sat14CF   | na     | na |
| chr9 | 51107809 | 51108102 | 294 SAT1_CF   | blue   | na |
| chr9 | 51132191 | 51132618 | 428 Sat2CF    | purple | na |
| chr9 | 51132515 | 51132644 | 130 Sat2CF    | purple | na |
| chr9 | 51509989 | 51510050 | 62 Sat165CF   | na     | na |
| chr9 | 52594074 | 52594141 | 68 Sat16CF    | na     | na |
| chr9 | 52609228 | 52609299 | 72 Sat5CF     | stalk  | na |
| chr9 | 52760313 | 52761137 | 825 Sat50CF   | na     | na |
| chr9 | 52820147 | 52820335 | 189 Carsat3   | green  | na |
| chr9 | 52841012 | 52841375 | 364 Sat91CF   | na     | na |
| chr9 | 53259371 | 53259589 | 219 Sat50CF   | na     | na |
| chr9 | 53281941 | 53282521 | 581 Sat19CF   | na     | na |
| chr9 | 53527471 | 53527536 | 66 Sat28CF    | na     | na |
| chr9 | 54420524 | 54420549 | 26 Sat5CF     | stalk  | na |
| chr9 | 54826491 | 54826572 | 82 Sat38CF    | na     | na |

|       |          |          |              |        |    |
|-------|----------|----------|--------------|--------|----|
| chr9  | 54827129 | 54827193 | 65 Sat38CF   | na     | na |
| chr9  | 55367091 | 55367303 | 213 Sat41CF  | na     | na |
| chr9  | 55375039 | 55375277 | 239 Sat38CF  | na     | na |
| chr9  | 55474052 | 55474147 | 96 Sat100CF  | na     | na |
| chr9  | 56410503 | 56410564 | 62 Sat90CF   | na     | na |
| chr9  | 58052205 | 58052370 | 166 CarSat1  | red    | na |
| chr9  | 58232289 | 58232398 | 110 Sat12CF  | na     | na |
| chr9  | 59245317 | 59246246 | 930 Carsat3  | green  | na |
| chr9  | 59521529 | 59521579 | 51 Sat10CF   | na     | na |
| chr9  | 61438859 | 61438910 | 52 Sat32CF   | na     | na |
| chr9  | 62453401 | 62453441 | 41 Sat33CF   | na     | na |
| chr9  | 64389918 | 64390948 | 1031 Carsat2 | orange | na |
| chr9  | 64390989 | 64392563 | 1575 Carsat2 | orange | na |
| chr9  | 64395464 | 64396305 | 842 Carsat2  | orange | na |
| chr9  | 64396344 | 64397007 | 664 Carsat2  | orange | na |
| chrUn | 43       | 756      | 714 CarSat1  | red    | na |
| chrUn | 790      | 3716     | 2927 CarSat1 | red    | na |
| chrUn | 3741     | 4693     | 953 CarSat1  | red    | na |
| chrUn | 4720     | 5871     | 1152 CarSat1 | red    | na |
| chrUn | 6066     | 6888     | 823 CarSat1  | red    | na |
| chrUn | 6904     | 9098     | 2195 CarSat1 | red    | na |
| chrUn | 9123     | 10075    | 953 CarSat1  | red    | na |
| chrUn | 10102    | 12035    | 1934 CarSat1 | red    | na |
| chrUn | 12060    | 12769    | 710 CarSat1  | red    | na |
| chrUn | 12807    | 14252    | 1446 CarSat1 | red    | na |
| chrUn | 14277    | 18442    | 4166 CarSat1 | red    | na |
| chrUn | 18468    | 19540    | 1073 CarSat1 | red    | na |
| chrUn | 19674    | 19790    | 117 CarSat1  | red    | na |
| chrUn | 19999    | 21669    | 1671 CarSat1 | red    | na |
| chrUn | 28871    | 29819    | 949 Sat2CF   | purple | na |
| chrUn | 30030    | 30171    | 142 Sat2CF   | purple | na |
| chrUn | 30031    | 30199    | 169 Sat2CF   | purple | na |
| chrUn | 44444    | 45613    | 1170 Sat2CF  | purple | na |
| chrUn | 45505    | 45682    | 178 Sat2CF   | purple | na |
| chrUn | 61085    | 62024    | 940 Sat2CF   | purple | na |
| chrUn | 61096    | 62145    | 1050 Sat2CF  | purple | na |
| chrUn | 96730    | 97875    | 1146 Sat2CF  | purple | na |
| chrUn | 127474   | 127582   | 109 Sat2CF   | purple | na |
| chrUn | 127485   | 128314   | 830 Sat2CF   | purple | na |
| chrUn | 127931   | 128376   | 446 Sat2CF   | purple | na |
| chrUn | 150992   | 152128   | 1137 Sat2CF  | purple | na |
| chrUn | 170510   | 171322   | 813 Sat2CF   | purple | na |

|       |        |        |             |        |    |
|-------|--------|--------|-------------|--------|----|
| chrUn | 170515 | 170677 | 163 Sat2CF  | purple | na |
| chrUn | 170584 | 171309 | 726 Sat2CF  | purple | na |
| chrUn | 194239 | 194993 | 755 Sat2CF  | purple | na |
| chrUn | 194329 | 194991 | 663 Sat2CF  | purple | na |
| chrUn | 210969 | 212134 | 1166 Sat2CF | purple | na |
| chrUn | 211177 | 212155 | 979 Sat2CF  | purple | na |
| chrUn | 212026 | 212205 | 180 Sat2CF  | purple | na |
| chrUn | 212095 | 212161 | 67 Sat2CF   | purple | na |
| chrUn | 227132 | 228011 | 880 Sat2CF  | purple | na |
| chrUn | 227229 | 228299 | 1071 Sat2CF | purple | na |
| chrUn | 258280 | 259446 | 1167 Sat2CF | purple | na |
| chrUn | 259301 | 259483 | 183 Sat2CF  | purple | na |
| chrUn | 280959 | 282171 | 1213 Sat2CF | purple | na |
| chrUn | 282042 | 282191 | 150 Sat2CF  | purple | na |
| chrUn | 296752 | 297969 | 1218 Sat2CF | purple | na |
| chrUn | 311799 | 312595 | 797 Sat2CF  | purple | na |
| chrUn | 325477 | 326728 | 1252 Sat2CF | purple | na |
| chrUn | 325607 | 326723 | 1117 Sat2CF | purple | na |
| chrUn | 349643 | 350819 | 1177 Sat2CF | purple | na |
| chrUn | 378305 | 378695 | 391 Sat2CF  | purple | na |
| chrUn | 378371 | 378721 | 351 Sat2CF  | purple | na |
| chrUn | 403864 | 404998 | 1135 Sat2CF | purple | na |
| chrUn | 403998 | 405083 | 1086 Sat2CF | purple | na |
| chrUn | 434790 | 434898 | 109 Sat2CF  | purple | na |
| chrUn | 434801 | 435662 | 862 Sat2CF  | purple | na |
| chrUn | 435535 | 435696 | 162 Sat2CF  | purple | na |
| chrUn | 464635 | 465855 | 1221 Sat2CF | purple | na |
| chrUn | 464770 | 465850 | 1081 Sat2CF | purple | na |
| chrUn | 465726 | 465875 | 150 Sat2CF  | purple | na |
| chrUn | 471285 | 472187 | 903 Sat2CF  | purple | na |
| chrUn | 471307 | 472066 | 760 Sat2CF  | purple | na |
| chrUn | 497848 | 498851 | 1004 Sat2CF | purple | na |
| chrUn | 511484 | 511874 | 391 Sat2CF  | purple | na |
| chrUn | 511550 | 511900 | 351 Sat2CF  | purple | na |
| chrUn | 533272 | 533412 | 141 Sat2CF  | purple | na |
| chrUn | 533301 | 534099 | 799 Sat2CF  | purple | na |
| chrUn | 533991 | 534115 | 125 Sat2CF  | purple | na |
| chrUn | 587627 | 588491 | 865 Sat2CF  | purple | na |
| chrUn | 620432 | 620540 | 109 Sat2CF  | purple | na |
| chrUn | 620443 | 621304 | 862 Sat2CF  | purple | na |
| chrUn | 620703 | 621375 | 673 Sat2CF  | purple | na |
| chrUn | 642430 | 643551 | 1122 Sat2CF | purple | na |

|       |         |         |             |        |    |
|-------|---------|---------|-------------|--------|----|
| chrUn | 643423  | 643571  | 149 Sat2CF  | purple | na |
| chrUn | 658107  | 659339  | 1233 Sat2CF | purple | na |
| chrUn | 702822  | 704001  | 1180 Sat2CF | purple | na |
| chrUn | 725144  | 725282  | 139 Sat2CF  | purple | na |
| chrUn | 725171  | 725966  | 796 Sat2CF  | purple | na |
| chrUn | 725858  | 725982  | 125 Sat2CF  | purple | na |
| chrUn | 748889  | 750054  | 1166 Sat2CF | purple | na |
| chrUn | 806044  | 806942  | 899 Sat2CF  | purple | na |
| chrUn | 806107  | 806891  | 785 Sat2CF  | purple | na |
| chrUn | 824212  | 824532  | 321 Sat2CF  | purple | na |
| chrUn | 824269  | 824563  | 295 Sat2CF  | purple | na |
| chrUn | 840482  | 841434  | 953 Sat2CF  | purple | na |
| chrUn | 840617  | 841354  | 738 Sat2CF  | purple | na |
| chrUn | 860964  | 861701  | 738 Sat2CF  | purple | na |
| chrUn | 907009  | 907931  | 923 Sat2CF  | purple | na |
| chrUn | 907072  | 907880  | 809 Sat2CF  | purple | na |
| chrUn | 932148  | 933366  | 1219 Sat2CF | purple | na |
| chrUn | 933237  | 933386  | 150 Sat2CF  | purple | na |
| chrUn | 972151  | 973284  | 1134 Sat2CF | purple | na |
| chrUn | 972285  | 973400  | 1116 Sat2CF | purple | na |
| chrUn | 1002817 | 1003923 | 1107 Sat2CF | purple | na |
| chrUn | 1027944 | 1028806 | 863 Sat2CF  | purple | na |
| chrUn | 1028089 | 1028794 | 706 Sat2CF  | purple | na |
| chrUn | 1047252 | 1047806 | 555 Sat2CF  | purple | na |
| chrUn | 1070812 | 1071758 | 947 Sat2CF  | purple | na |
| chrUn | 1070947 | 1071685 | 739 Sat2CF  | purple | na |
| chrUn | 1091513 | 1092250 | 738 Sat2CF  | purple | na |
| chrUn | 1091587 | 1092248 | 662 Sat2CF  | purple | na |
| chrUn | 1130780 | 1131998 | 1219 Sat2CF | purple | na |
| chrUn | 1130907 | 1131993 | 1087 Sat2CF | purple | na |
| chrUn | 1161424 | 1161799 | 376 Sat2CF  | purple | na |
| chrUn | 1161465 | 1162304 | 840 Sat2CF  | purple | na |
| chrUn | 1161487 | 1162225 | 739 Sat2CF  | purple | na |
| chrUn | 1177293 | 1178437 | 1145 Sat2CF | purple | na |
| chrUn | 1177770 | 1178516 | 747 Sat2CF  | purple | na |
| chrUn | 1193329 | 1194161 | 833 Sat2CF  | purple | na |
| chrUn | 1193413 | 1194139 | 727 Sat2CF  | purple | na |
| chrUn | 1204879 | 1206054 | 1176 Sat2CF | purple | na |
| chrUn | 1244561 | 1245424 | 864 Sat2CF  | purple | na |
| chrUn | 1277620 | 1277957 | 338 Sat2CF  | purple | na |
| chrUn | 1277655 | 1278514 | 860 Sat2CF  | purple | na |
| chrUn | 1278116 | 1278593 | 478 Sat2CF  | purple | na |



|       |         |         |             |        |    |
|-------|---------|---------|-------------|--------|----|
| chrUn | 1300086 | 1301306 | 1221 Sat2CF | purple | na |
| chrUn | 1301177 | 1301326 | 150 Sat2CF  | purple | na |
| chrUn | 1316609 | 1317752 | 1144 Sat2CF | purple | na |
| chrUn | 1316613 | 1317880 | 1268 Sat2CF | purple | na |
| chrUn | 1334110 | 1335278 | 1169 Sat2CF | purple | na |
| chrUn | 1335100 | 1335300 | 201 Sat2CF  | purple | na |
| chrUn | 1335170 | 1335349 | 180 Sat2CF  | purple | na |
| chrUn | 1345563 | 1346393 | 831 Sat2CF  | purple | na |
| chrUn | 1345647 | 1346372 | 726 Sat2CF  | purple | na |
| chrUn | 1346263 | 1346430 | 168 Sat2CF  | purple | na |
| chrUn | 1357127 | 1358325 | 1199 Sat2CF | purple | na |
| chrUn | 1368237 | 1369467 | 1231 Sat2CF | purple | na |
| chrUn | 1385209 | 1386463 | 1255 Sat2CF | purple | na |
| chrUn | 1385339 | 1386430 | 1092 Sat2CF | purple | na |
| chrUn | 1414795 | 1415981 | 1187 Sat2CF | purple | na |
| chrUn | 1445635 | 1446801 | 1167 Sat2CF | purple | na |
| chrUn | 1468630 | 1469066 | 437 Sat2CF  | purple | na |
| chrUn | 1468682 | 1469765 | 1084 Sat2CF | purple | na |
| chrUn | 1469641 | 1469790 | 150 Sat2CF  | purple | na |
| chrUn | 1483007 | 1484185 | 1179 Sat2CF | purple | na |
| chrUn | 1506923 | 1507715 | 793 Sat2CF  | purple | na |
| chrUn | 1526381 | 1527503 | 1123 Sat2CF | purple | na |
| chrUn | 1544006 | 1544957 | 952 Sat2CF  | purple | na |
| chrUn | 1544141 | 1544877 | 737 Sat2CF  | purple | na |
| chrUn | 1574944 | 1575808 | 865 Sat2CF  | purple | na |
| chrUn | 1593624 | 1594757 | 1134 Sat2CF | purple | na |
| chrUn | 1638169 | 1639029 | 861 Sat2CF  | purple | na |
| chrUn | 1652717 | 1653937 | 1221 Sat2CF | purple | na |
| chrUn | 1653808 | 1653957 | 150 Sat2CF  | purple | na |
| chrUn | 1692349 | 1693412 | 1064 Sat2CF | purple | na |
| chrUn | 1707960 | 1709081 | 1122 Sat2CF | purple | na |
| chrUn | 1708952 | 1709129 | 178 Sat2CF  | purple | na |
| chrUn | 1720944 | 1722187 | 1244 Sat2CF | purple | na |
| chrUn | 1750362 | 1751438 | 1077 Sat2CF | purple | na |
| chrUn | 1758268 | 1758618 | 351 Sat2CF  | purple | na |
| chrUn | 1779739 | 1780565 | 827 Sat2CF  | purple | na |
| chrUn | 1780457 | 1780581 | 125 Sat2CF  | purple | na |
| chrUn | 1821541 | 1822665 | 1125 Sat2CF | purple | na |
| chrUn | 1867583 | 1868820 | 1238 Sat2CF | purple | na |
| chrUn | 1882894 | 1883284 | 391 Sat2CF  | purple | na |
| chrUn | 1882960 | 1883317 | 358 Sat2CF  | purple | na |
| chrUn | 1904740 | 1904878 | 139 Sat2CF  | purple | na |

|       |         |         |             |        |    |
|-------|---------|---------|-------------|--------|----|
| chrUn | 1904767 | 1905563 | 797 Sat2CF  | purple | na |
| chrUn | 1904742 | 1904878 | 137 Sat2CF  | purple | na |
| chrUn | 1905455 | 1905579 | 125 Sat2CF  | purple | na |
| chrUn | 1925911 | 1927077 | 1167 Sat2CF | purple | na |
| chrUn | 1926932 | 1927114 | 183 Sat2CF  | purple | na |
| chrUn | 1955213 | 1955473 | 261 Sat2CF  | purple | na |
| chrUn | 1955656 | 1956616 | 961 Sat2CF  | purple | na |
| chrUn | 1956492 | 1956641 | 150 Sat2CF  | purple | na |
| chrUn | 1974983 | 1976162 | 1180 Sat2CF | purple | na |
| chrUn | 1999142 | 2000154 | 1013 Sat2CF | purple | na |
| chrUn | 2013277 | 2013621 | 345 Sat2CF  | purple | na |
| chrUn | 2013334 | 2013616 | 283 Sat2CF  | purple | na |
| chrUn | 2013340 | 2013686 | 347 Sat2CF  | purple | na |
| chrUn | 2035091 | 2035229 | 139 Sat2CF  | purple | na |
| chrUn | 2035118 | 2035659 | 542 Sat2CF  | purple | na |
| chrUn | 2035531 | 2035675 | 145 Sat2CF  | purple | na |
| chrUn | 2064934 | 2066149 | 1216 Sat2CF | purple | na |
| chrUn | 2066020 | 2066169 | 150 Sat2CF  | purple | na |
| chrUn | 2088082 | 2088427 | 346 Sat2CF  | purple | na |
| chrUn | 2088141 | 2088931 | 791 Sat2CF  | purple | na |
| chrUn | 2106142 | 2106535 | 394 Sat2CF  | purple | na |
| chrUn | 2106211 | 2107550 | 1340 Sat2CF | purple | na |
| chrUn | 2106347 | 2107685 | 1339 Sat2CF | purple | na |
| chrUn | 2106663 | 2107803 | 1141 Sat2CF | purple | na |
| chrUn | 2107646 | 2107822 | 177 Sat2CF  | purple | na |
| chrUn | 2113197 | 2113252 | 56 Sat21CF  | na     | na |
| chrUn | 2127512 | 2128465 | 954 Sat2CF  | purple | na |
| chrUn | 2127647 | 2128385 | 739 Sat2CF  | purple | na |
| chrUn | 2143436 | 2143584 | 149 Sat2CF  | purple | na |
| chrUn | 2143509 | 2144348 | 840 Sat2CF  | purple | na |
| chrUn | 2179945 | 2181161 | 1217 Sat2CF | purple | na |
| chrUn | 2180080 | 2181190 | 1111 Sat2CF | purple | na |
| chrUn | 2196892 | 2198036 | 1145 Sat2CF | purple | na |
| chrUn | 2196896 | 2198164 | 1269 Sat2CF | purple | na |
| chrUn | 2211682 | 2212864 | 1183 Sat2CF | purple | na |
| chrUn | 2225934 | 2226729 | 796 Sat2CF  | purple | na |
| chrUn | 2225999 | 2226713 | 715 Sat2CF  | purple | na |
| chrUn | 2226603 | 2226770 | 168 Sat2CF  | purple | na |
| chrUn | 2238065 | 2239240 | 1176 Sat2CF | purple | na |
| chrUn | 2291978 | 2293157 | 1180 Sat2CF | purple | na |
| chrUn | 2315936 | 2316281 | 346 Sat2CF  | purple | na |
| chrUn | 2315990 | 2316785 | 796 Sat2CF  | purple | na |

|       |         |         |              |        |    |
|-------|---------|---------|--------------|--------|----|
| chrUn | 2334722 | 2335245 | 524 Sat2CF   | purple | na |
| chrUn | 2334783 | 2335703 | 921 Sat2CF   | purple | na |
| chrUn | 2341141 | 2341196 | 56 Sat21CF   | na     | na |
| chrUn | 2355474 | 2356426 | 953 Sat2CF   | purple | na |
| chrUn | 2355609 | 2356346 | 738 Sat2CF   | purple | na |
| chrUn | 2379036 | 2379773 | 738 Sat2CF   | purple | na |
| chrUn | 2379110 | 2379772 | 663 Sat2CF   | purple | na |
| chrUn | 2419710 | 2420912 | 1203 Sat2CF  | purple | na |
| chrUn | 2419836 | 2420922 | 1087 Sat2CF  | purple | na |
| chrUn | 2420798 | 2420947 | 150 Sat2CF   | purple | na |
| chrUn | 2435688 | 2435796 | 109 Sat2CF   | purple | na |
| chrUn | 2435699 | 2436559 | 861 Sat2CF   | purple | na |
| chrUn | 2435959 | 2436640 | 682 Sat2CF   | purple | na |
| chrUn | 2465909 | 2467073 | 1165 Sat2CF  | purple | na |
| chrUn | 2466966 | 2467187 | 222 Sat2CF   | purple | na |
| chrUn | 2482014 | 2482337 | 324 Sat2CF   | purple | na |
| chrUn | 2482047 | 2482407 | 361 Sat2CF   | purple | na |
| chrUn | 2482086 | 2482896 | 811 Sat2CF   | purple | na |
| chrUn | 2482088 | 2482814 | 727 Sat2CF   | purple | na |
| chrUn | 2541039 | 2541837 | 799 Sat2CF   | purple | na |
| chrUn | 2541720 | 2541887 | 168 Sat2CF   | purple | na |
| chrUn | 2560474 | 2560606 | 133 Sat2CF   | purple | na |
| chrUn | 2560499 | 2561292 | 794 Sat2CF   | purple | na |
| chrUn | 2561184 | 2561308 | 125 Sat2CF   | purple | na |
| chrUn | 2585038 | 2586171 | 1134 Sat2CF  | purple | na |
| chrUn | 2622441 | 2623518 | 1078 Sat2CF  | purple | na |
| chrUn | 2622576 | 2623504 | 929 Sat2CF   | purple | na |
| chrUn | 2623389 | 2623590 | 202 Sat2CF   | purple | na |
| chrUn | 2625225 | 2625635 | 411 CarSat1  | red    | na |
| chrUn | 2626606 | 2627461 | 856 CarSat1  | red    | na |
| chrUn | 2627482 | 2628262 | 781 CarSat1  | red    | na |
| chrUn | 2661902 | 2662656 | 755 SAT1_CF  | blue   | na |
| chrUn | 2662699 | 2663658 | 960 SAT1_CF  | blue   | na |
| chrUn | 2663776 | 2664724 | 949 SAT1_CF  | blue   | na |
| chrUn | 2664737 | 2665238 | 502 SAT1_CF  | blue   | na |
| chrUn | 2665250 | 2665924 | 675 SAT1_CF  | blue   | na |
| chrUn | 2665963 | 2667776 | 1814 SAT1_CF | blue   | na |
| chrUn | 2667855 | 2668395 | 541 SAT1_CF  | blue   | na |
| chrUn | 2668483 | 2668984 | 502 SAT1_CF  | blue   | na |
| chrUn | 2668996 | 2670828 | 1833 SAT1_CF | blue   | na |
| chrUn | 2670907 | 2671417 | 511 SAT1_CF  | blue   | na |
| chrUn | 2671445 | 2671602 | 158 SAT1_CF  | blue   | na |

|       |         |         |              |      |    |
|-------|---------|---------|--------------|------|----|
| chrUn | 2671647 | 2672147 | 501 SAT1_CF  | blue | na |
| chrUn | 2672169 | 2675382 | 3214 SAT1_CF | blue | na |
| chrUn | 2675427 | 2676013 | 587 SAT1_CF  | blue | na |
| chrUn | 2676070 | 2676623 | 554 SAT1_CF  | blue | na |
| chrUn | 2676635 | 2677318 | 684 SAT1_CF  | blue | na |
| chrUn | 2677330 | 2677987 | 658 SAT1_CF  | blue | na |
| chrUn | 2678031 | 2679100 | 1070 SAT1_CF | blue | na |
| chrUn | 2679123 | 2680376 | 1254 SAT1_CF | blue | na |
| chrUn | 2680389 | 2681643 | 1255 SAT1_CF | blue | na |
| chrUn | 2681655 | 2681763 | 109 SAT1_CF  | blue | na |
| chrUn | 2681784 | 2682330 | 547 SAT1_CF  | blue | na |
| chrUn | 2682373 | 2683372 | 1000 SAT1_CF | blue | na |
| chrUn | 2683392 | 2684363 | 972 SAT1_CF  | blue | na |
| chrUn | 2684397 | 2685634 | 1238 SAT1_CF | blue | na |
| chrUn | 2685667 | 2686171 | 505 SAT1_CF  | blue | na |
| chrUn | 2686203 | 2686907 | 705 SAT1_CF  | blue | na |
| chrUn | 2686925 | 2687028 | 104 SAT1_CF  | blue | na |
| chrUn | 2687051 | 2687722 | 672 SAT1_CF  | blue | na |
| chrUn | 2687745 | 2688291 | 547 SAT1_CF  | blue | na |
| chrUn | 2688304 | 2690091 | 1788 SAT1_CF | blue | na |
| chrUn | 2690171 | 2690336 | 166 SAT1_CF  | blue | na |
| chrUn | 2690521 | 2690705 | 185 SAT1_CF  | blue | na |
| chrUn | 2690722 | 2691241 | 520 SAT1_CF  | blue | na |
| chrUn | 2691254 | 2693077 | 1824 SAT1_CF | blue | na |
| chrUn | 2693090 | 2693195 | 106 SAT1_CF  | blue | na |
| chrUn | 2693218 | 2693771 | 554 SAT1_CF  | blue | na |
| chrUn | 2693785 | 2694642 | 858 SAT1_CF  | blue | na |
| chrUn | 2694684 | 2696136 | 1453 SAT1_CF | blue | na |
| chrUn | 2696148 | 2697608 | 1461 SAT1_CF | blue | na |
| chrUn | 2697639 | 2698145 | 507 SAT1_CF  | blue | na |
| chrUn | 2698178 | 2698335 | 158 SAT1_CF  | blue | na |
| chrUn | 2698380 | 2698881 | 502 SAT1_CF  | blue | na |
| chrUn | 2698893 | 2699570 | 678 SAT1_CF  | blue | na |
| chrUn | 2699613 | 2701240 | 1628 SAT1_CF | blue | na |
| chrUn | 2701254 | 2702084 | 831 SAT1_CF  | blue | na |
| chrUn | 2702226 | 2702800 | 575 SAT1_CF  | blue | na |
| chrUn | 2702812 | 2704560 | 1749 SAT1_CF | blue | na |
| chrUn | 2704598 | 2704999 | 402 SAT1_CF  | blue | na |
| chrUn | 2705039 | 2705541 | 503 SAT1_CF  | blue | na |
| chrUn | 2705559 | 2705661 | 103 SAT1_CF  | blue | na |
| chrUn | 2705682 | 2706434 | 753 SAT1_CF  | blue | na |
| chrUn | 2706456 | 2707000 | 545 SAT1_CF  | blue | na |

|       |         |         |              |      |    |
|-------|---------|---------|--------------|------|----|
| chrUn | 2707045 | 2710244 | 3200 SAT1_CF | blue | na |
| chrUn | 2710259 | 2710959 | 701 SAT1_CF  | blue | na |
| chrUn | 2710972 | 2712421 | 1450 SAT1_CF | blue | na |
| chrUn | 2712482 | 2713578 | 1097 SAT1_CF | blue | na |
| chrUn | 2713664 | 2714861 | 1198 SAT1_CF | blue | na |
| chrUn | 2714873 | 2715708 | 836 SAT1_CF  | blue | na |
| chrUn | 2715889 | 2716070 | 182 SAT1_CF  | blue | na |
| chrUn | 2716110 | 2716612 | 503 SAT1_CF  | blue | na |
| chrUn | 2716634 | 2717308 | 675 SAT1_CF  | blue | na |
| chrUn | 2717320 | 2717997 | 678 SAT1_CF  | blue | na |
| chrUn | 2718040 | 2718582 | 543 SAT1_CF  | blue | na |
| chrUn | 2718625 | 2719173 | 549 SAT1_CF  | blue | na |
| chrUn | 2719185 | 2719855 | 671 SAT1_CF  | blue | na |
| chrUn | 2719867 | 2720728 | 862 SAT1_CF  | blue | na |
| chrUn | 2720741 | 2720846 | 106 SAT1_CF  | blue | na |
| chrUn | 2720869 | 2722819 | 1951 SAT1_CF | blue | na |
| chrUn | 2722849 | 2723724 | 876 SAT1_CF  | blue | na |
| chrUn | 2723744 | 2724679 | 936 SAT1_CF  | blue | na |
| chrUn | 2724718 | 2725340 | 623 SAT1_CF  | blue | na |
| chrUn | 2725361 | 2726573 | 1213 SAT1_CF | blue | na |
| chrUn | 2726617 | 2728610 | 1994 SAT1_CF | blue | na |
| chrUn | 2728697 | 2729195 | 499 SAT1_CF  | blue | na |
| chrUn | 2729207 | 2731010 | 1804 SAT1_CF | blue | na |
| chrUn | 2731090 | 2731255 | 166 SAT1_CF  | blue | na |
| chrUn | 2731436 | 2731620 | 185 SAT1_CF  | blue | na |
| chrUn | 2731656 | 2732155 | 500 SAT1_CF  | blue | na |
| chrUn | 2732169 | 2732275 | 107 SAT1_CF  | blue | na |
| chrUn | 2732298 | 2732817 | 520 SAT1_CF  | blue | na |
| chrUn | 2732829 | 2733687 | 859 SAT1_CF  | blue | na |
| chrUn | 2733740 | 2734511 | 772 SAT1_CF  | blue | na |
| chrUn | 2734577 | 2735089 | 513 SAT1_CF  | blue | na |
| chrUn | 2735109 | 2735179 | 71 SAT1_CF   | blue | na |
| chrUn | 2735236 | 2735790 | 555 SAT1_CF  | blue | na |
| chrUn | 2735802 | 2736479 | 678 SAT1_CF  | blue | na |
| chrUn | 2736522 | 2737153 | 632 SAT1_CF  | blue | na |
| chrUn | 2737180 | 2738479 | 1300 SAT1_CF | blue | na |
| chrUn | 2738491 | 2739161 | 671 SAT1_CF  | blue | na |
| chrUn | 2739173 | 2739850 | 678 SAT1_CF  | blue | na |
| chrUn | 2739947 | 2740489 | 543 SAT1_CF  | blue | na |
| chrUn | 2740533 | 2742930 | 2398 SAT1_CF | blue | na |
| chrUn | 2742964 | 2743315 | 352 SAT1_CF  | blue | na |
| chrUn | 2743404 | 2743897 | 494 SAT1_CF  | blue | na |

|       |         |         |              |      |    |
|-------|---------|---------|--------------|------|----|
| chrUn | 2743926 | 2745088 | 1163 SAT1_CF | blue | na |
| chrUn | 2745103 | 2745259 | 157 SAT1_CF  | blue | na |
| chrUn | 2745304 | 2745804 | 501 SAT1_CF  | blue | na |
| chrUn | 2745817 | 2747193 | 1377 SAT1_CF | blue | na |
| chrUn | 2747207 | 2747660 | 454 SAT1_CF  | blue | na |
| chrUn | 2747735 | 2748279 | 545 SAT1_CF  | blue | na |
| chrUn | 2748291 | 2749610 | 1320 SAT1_CF | blue | na |
| chrUn | 2749634 | 2749994 | 361 SAT1_CF  | blue | na |
| chrUn | 2750038 | 2750549 | 512 SAT1_CF  | blue | na |
| chrUn | 2750592 | 2750965 | 374 SAT1_CF  | blue | na |
| chrUn | 2751001 | 2751502 | 502 SAT1_CF  | blue | na |
| chrUn | 2751515 | 2752274 | 760 SAT1_CF  | blue | na |
| chrUn | 2752286 | 2753418 | 1133 SAT1_CF | blue | na |
| chrUn | 2753430 | 2754107 | 678 SAT1_CF  | blue | na |
| chrUn | 2754150 | 2755150 | 1001 SAT1_CF | blue | na |
| chrUn | 2755216 | 2755901 | 686 SAT1_CF  | blue | na |
| chrUn | 2755953 | 2756652 | 700 SAT1_CF  | blue | na |
| chrUn | 2756665 | 2756771 | 107 SAT1_CF  | blue | na |
| chrUn | 2756795 | 2757423 | 629 SAT1_CF  | blue | na |
| chrUn | 2757458 | 2758305 | 848 SAT1_CF  | blue | na |
| chrUn | 2758323 | 2759869 | 1547 SAT1_CF | blue | na |
| chrUn | 2759953 | 2761723 | 1771 SAT1_CF | blue | na |
| chrUn | 2761840 | 2762357 | 518 SAT1_CF  | blue | na |
| chrUn | 2762415 | 2762961 | 547 SAT1_CF  | blue | na |
| chrUn | 2763004 | 2763548 | 545 SAT1_CF  | blue | na |
| chrUn | 2763590 | 2763870 | 281 SAT1_CF  | blue | na |
| chrUn | 2763891 | 2764821 | 931 SAT1_CF  | blue | na |
| chrUn | 2764861 | 2765361 | 501 SAT1_CF  | blue | na |
| chrUn | 2765376 | 2765455 | 80 SAT1_CF   | blue | na |
| chrUn | 2765468 | 2765971 | 504 SAT1_CF  | blue | na |
| chrUn | 2765998 | 2766667 | 670 SAT1_CF  | blue | na |
| chrUn | 2766680 | 2767657 | 978 SAT1_CF  | blue | na |
| chrUn | 2767681 | 2768231 | 551 SAT1_CF  | blue | na |
| chrUn | 2768299 | 2768552 | 254 SAT1_CF  | blue | na |
| chrUn | 2768568 | 2770242 | 1675 SAT1_CF | blue | na |
| chrUn | 2770287 | 2771274 | 988 SAT1_CF  | blue | na |
| chrUn | 2771331 | 2772288 | 958 SAT1_CF  | blue | na |
| chrUn | 2772349 | 2772828 | 480 SAT1_CF  | blue | na |
| chrUn | 2772855 | 2773603 | 749 SAT1_CF  | blue | na |
| chrUn | 2773615 | 2774475 | 861 SAT1_CF  | blue | na |
| chrUn | 2774552 | 2775388 | 837 SAT1_CF  | blue | na |
| chrUn | 2775415 | 2776886 | 1472 SAT1_CF | blue | na |

|       |         |         |              |      |    |
|-------|---------|---------|--------------|------|----|
| chrUn | 2776949 | 2777523 | 575 SAT1_CF  | blue | na |
| chrUn | 2777535 | 2778211 | 677 SAT1_CF  | blue | na |
| chrUn | 2778257 | 2779334 | 1078 SAT1_CF | blue | na |
| chrUn | 2779576 | 2780500 | 925 SAT1_CF  | blue | na |
| chrUn | 2780513 | 2781213 | 701 SAT1_CF  | blue | na |
| chrUn | 2781225 | 2781902 | 678 SAT1_CF  | blue | na |
| chrUn | 2781948 | 2782488 | 541 SAT1_CF  | blue | na |
| chrUn | 2782530 | 2782812 | 283 SAT1_CF  | blue | na |
| chrUn | 2782833 | 2783350 | 518 SAT1_CF  | blue | na |
| chrUn | 2783361 | 2784228 | 868 SAT1_CF  | blue | na |
| chrUn | 2784274 | 2784783 | 510 SAT1_CF  | blue | na |
| chrUn | 2784811 | 2784947 | 137 SAT1_CF  | blue | na |
| chrUn | 2785013 | 2785515 | 503 SAT1_CF  | blue | na |
| chrUn | 2785528 | 2786203 | 676 SAT1_CF  | blue | na |
| chrUn | 2786215 | 2786387 | 173 SAT1_CF  | blue | na |
| chrUn | 2786427 | 2788068 | 1642 SAT1_CF | blue | na |
| chrUn | 2788117 | 2789523 | 1407 SAT1_CF | blue | na |
| chrUn | 2789570 | 2790277 | 708 SAT1_CF  | blue | na |
| chrUn | 2790295 | 2791052 | 758 SAT1_CF  | blue | na |
| chrUn | 2791064 | 2791892 | 829 SAT1_CF  | blue | na |
| chrUn | 2791908 | 2792376 | 469 SAT1_CF  | blue | na |
| chrUn | 2792420 | 2792966 | 547 SAT1_CF  | blue | na |
| chrUn | 2793009 | 2793519 | 511 SAT1_CF  | blue | na |
| chrUn | 2793546 | 2793679 | 134 SAT1_CF  | blue | na |
| chrUn | 2793737 | 2794238 | 502 SAT1_CF  | blue | na |
| chrUn | 2794251 | 2796276 | 2026 SAT1_CF | blue | na |
| chrUn | 2796301 | 2796643 | 343 SAT1_CF  | blue | na |
| chrUn | 2796670 | 2797882 | 1213 SAT1_CF | blue | na |
| chrUn | 2797895 | 2799264 | 1370 SAT1_CF | blue | na |
| chrUn | 2799307 | 2799937 | 631 SAT1_CF  | blue | na |
| chrUn | 2800000 | 2800559 | 560 SAT1_CF  | blue | na |
| chrUn | 2800604 | 2801231 | 628 SAT1_CF  | blue | na |
| chrUn | 2801243 | 2801917 | 675 SAT1_CF  | blue | na |
| chrUn | 2801960 | 2803997 | 2038 SAT1_CF | blue | na |
| chrUn | 2804037 | 2804531 | 495 SAT1_CF  | blue | na |
| chrUn | 2804551 | 2805233 | 683 SAT1_CF  | blue | na |
| chrUn | 2805256 | 2805350 | 95 SAT1_CF   | blue | na |
| chrUn | 2805373 | 2805919 | 547 SAT1_CF  | blue | na |
| chrUn | 2805962 | 2807700 | 1739 SAT1_CF | blue | na |
| chrUn | 2807712 | 2809075 | 1364 SAT1_CF | blue | na |
| chrUn | 2809088 | 2809668 | 581 SAT1_CF  | blue | na |
| chrUn | 2809696 | 2810331 | 636 SAT1_CF  | blue | na |

|       |         |         |              |      |    |
|-------|---------|---------|--------------|------|----|
| chrUn | 2810353 | 2810898 | 546 SAT1_CF  | blue | na |
| chrUn | 2810941 | 2812013 | 1073 SAT1_CF | blue | na |
| chrUn | 2812045 | 2812734 | 690 SAT1_CF  | blue | na |
| chrUn | 2812781 | 2813294 | 514 SAT1_CF  | blue | na |
| chrUn | 2813328 | 2814512 | 1185 SAT1_CF | blue | na |
| chrUn | 2814552 | 2815740 | 1189 SAT1_CF | blue | na |
| chrUn | 2815783 | 2817437 | 1655 SAT1_CF | blue | na |
| chrUn | 2817448 | 2817767 | 320 SAT1_CF  | blue | na |
| chrUn | 2817820 | 2818439 | 620 SAT1_CF  | blue | na |
| chrUn | 2818463 | 2819016 | 554 SAT1_CF  | blue | na |
| chrUn | 2819030 | 2820289 | 1260 SAT1_CF | blue | na |
| chrUn | 2820376 | 2821659 | 1284 SAT1_CF | blue | na |
| chrUn | 2821678 | 2822223 | 546 SAT1_CF  | blue | na |
| chrUn | 2822266 | 2823378 | 1113 SAT1_CF | blue | na |
| chrUn | 2823421 | 2824004 | 584 SAT1_CF  | blue | na |
| chrUn | 2824016 | 2825612 | 1597 SAT1_CF | blue | na |
| chrUn | 2825624 | 2826958 | 1335 SAT1_CF | blue | na |
| chrUn | 2827002 | 2828336 | 1335 SAT1_CF | blue | na |
| chrUn | 2828404 | 2830705 | 2302 SAT1_CF | blue | na |
| chrUn | 2830749 | 2831705 | 957 SAT1_CF  | blue | na |
| chrUn | 2831748 | 2832249 | 502 SAT1_CF  | blue | na |
| chrUn | 2832261 | 2832333 | 73 SAT1_CF   | blue | na |
| chrUn | 2832390 | 2832867 | 478 SAT1_CF  | blue | na |
| chrUn | 2832879 | 2832988 | 110 SAT1_CF  | blue | na |
| chrUn | 2833008 | 2834208 | 1201 SAT1_CF | blue | na |
| chrUn | 2834252 | 2834686 | 435 SAT1_CF  | blue | na |
| chrUn | 2834707 | 2835641 | 935 SAT1_CF  | blue | na |
| chrUn | 2835700 | 2836180 | 481 SAT1_CF  | blue | na |
| chrUn | 2836193 | 2837327 | 1135 SAT1_CF | blue | na |
| chrUn | 2837360 | 2838243 | 884 SAT1_CF  | blue | na |
| chrUn | 2838332 | 2838830 | 499 SAT1_CF  | blue | na |
| chrUn | 2838857 | 2839467 | 611 SAT1_CF  | blue | na |
| chrUn | 2839479 | 2840139 | 661 SAT1_CF  | blue | na |
| chrUn | 2840187 | 2840720 | 534 SAT1_CF  | blue | na |
| chrUn | 2840749 | 2841414 | 666 SAT1_CF  | blue | na |
| chrUn | 2841458 | 2842836 | 1379 SAT1_CF | blue | na |
| chrUn | 2843025 | 2843526 | 502 SAT1_CF  | blue | na |
| chrUn | 2843544 | 2844300 | 757 SAT1_CF  | blue | na |
| chrUn | 2844312 | 2844987 | 676 SAT1_CF  | blue | na |
| chrUn | 2845030 | 2845838 | 809 SAT1_CF  | blue | na |
| chrUn | 2845861 | 2846882 | 1022 SAT1_CF | blue | na |
| chrUn | 2846910 | 2847047 | 138 SAT1_CF  | blue | na |



|       |         |         |              |      |    |
|-------|---------|---------|--------------|------|----|
| chrUn | 2847094 | 2847615 | 522 SAT1_CF  | blue | na |
| chrUn | 2847633 | 2847735 | 103 SAT1_CF  | blue | na |
| chrUn | 2847756 | 2848508 | 753 SAT1_CF  | blue | na |
| chrUn | 2848530 | 2849074 | 545 SAT1_CF  | blue | na |
| chrUn | 2849119 | 2851345 | 2227 SAT1_CF | blue | na |
| chrUn | 2851833 | 2852332 | 500 SAT1_CF  | blue | na |
| chrUn | 2852347 | 2853041 | 695 SAT1_CF  | blue | na |
| chrUn | 2853060 | 2854164 | 1105 SAT1_CF | blue | na |
| chrUn | 2979836 | 2980227 | 392 SAT1_CF  | blue | na |
| chrUn | 2980296 | 2980844 | 549 SAT1_CF  | blue | na |
| chrUn | 2980913 | 2981643 | 731 SAT1_CF  | blue | na |
| chrUn | 2981685 | 2982571 | 887 SAT1_CF  | blue | na |
| chrUn | 2982614 | 2983122 | 509 SAT1_CF  | blue | na |
| chrUn | 2983155 | 2983535 | 381 SAT1_CF  | blue | na |
| chrUn | 2983554 | 2984071 | 518 SAT1_CF  | blue | na |
| chrUn | 2984089 | 2984192 | 104 SAT1_CF  | blue | na |
| chrUn | 2984213 | 2984787 | 575 SAT1_CF  | blue | na |
| chrUn | 2984799 | 2986047 | 1249 SAT1_CF | blue | na |
| chrUn | 2986089 | 2986348 | 260 SAT1_CF  | blue | na |
| chrUn | 2986375 | 2988541 | 2167 SAT1_CF | blue | na |
| chrUn | 2988553 | 2989228 | 676 SAT1_CF  | blue | na |
| chrUn | 2989271 | 2990637 | 1367 SAT1_CF | blue | na |
| chrUn | 2990727 | 2991519 | 793 SAT1_CF  | blue | na |
| chrUn | 2991532 | 2994394 | 2863 SAT1_CF | blue | na |
| chrUn | 2994434 | 2994936 | 503 SAT1_CF  | blue | na |
| chrUn | 2994960 | 2996785 | 1826 SAT1_CF | blue | na |
| chrUn | 2996817 | 2996952 | 136 SAT1_CF  | blue | na |
| chrUn | 2996999 | 2997520 | 522 SAT1_CF  | blue | na |
| chrUn | 2997547 | 2998102 | 556 SAT1_CF  | blue | na |
| chrUn | 2998121 | 2999766 | 1646 SAT1_CF | blue | na |
| chrUn | 2999843 | 3001106 | 1264 SAT1_CF | blue | na |
| chrUn | 3001186 | 3002368 | 1183 SAT1_CF | blue | na |
| chrUn | 3002382 | 3002489 | 108 SAT1_CF  | blue | na |
| chrUn | 3002511 | 3003065 | 555 SAT1_CF  | blue | na |
| chrUn | 3003077 | 3003939 | 863 SAT1_CF  | blue | na |
| chrUn | 3003956 | 3005424 | 1469 SAT1_CF | blue | na |
| chrUn | 3005504 | 3006084 | 581 SAT1_CF  | blue | na |
| chrUn | 3006097 | 3008816 | 2720 SAT1_CF | blue | na |
| chrUn | 3008856 | 3009355 | 500 SAT1_CF  | blue | na |
| chrUn | 3009377 | 3010051 | 675 SAT1_CF  | blue | na |
| chrUn | 3010063 | 3010705 | 643 SAT1_CF  | blue | na |
| chrUn | 3010730 | 3012477 | 1748 SAT1_CF | blue | na |

|       |         |         |              |      |    |
|-------|---------|---------|--------------|------|----|
| chrUn | 3012489 | 3012807 | 319 SAT1_CF  | blue | na |
| chrUn | 3012860 | 3013362 | 503 SAT1_CF  | blue | na |
| chrUn | 3013374 | 3014176 | 803 SAT1_CF  | blue | na |
| chrUn | 3014198 | 3015402 | 1205 SAT1_CF | blue | na |
| chrUn | 3015446 | 3016786 | 1341 SAT1_CF | blue | na |
| chrUn | 3016809 | 3017327 | 519 SAT1_CF  | blue | na |
| chrUn | 3017355 | 3018024 | 670 SAT1_CF  | blue | na |
| chrUn | 3018036 | 3018718 | 683 SAT1_CF  | blue | na |
| chrUn | 3018729 | 3019221 | 493 SAT1_CF  | blue | na |
| chrUn | 3019249 | 3020436 | 1188 SAT1_CF | blue | na |
| chrUn | 3020480 | 3021439 | 960 SAT1_CF  | blue | na |
| chrUn | 3021460 | 3021980 | 521 SAT1_CF  | blue | na |
| chrUn | 3021998 | 3022676 | 679 SAT1_CF  | blue | na |
| chrUn | 3022687 | 3023362 | 676 SAT1_CF  | blue | na |
| chrUn | 3023404 | 3024390 | 987 SAT1_CF  | blue | na |
| chrUn | 3024423 | 3025271 | 849 SAT1_CF  | blue | na |
| chrUn | 3025283 | 3026174 | 892 SAT1_CF  | blue | na |
| chrUn | 3026187 | 3026868 | 682 SAT1_CF  | blue | na |
| chrUn | 3026895 | 3027547 | 653 SAT1_CF  | blue | na |
| chrUn | 3027589 | 3028549 | 961 SAT1_CF  | blue | na |
| chrUn | 3028608 | 3029155 | 548 SAT1_CF  | blue | na |
| chrUn | 3029195 | 3029598 | 404 SAT1_CF  | blue | na |
| chrUn | 3029641 | 3030142 | 502 SAT1_CF  | blue | na |
| chrUn | 3030160 | 3030836 | 677 SAT1_CF  | blue | na |
| chrUn | 3030850 | 3031524 | 675 SAT1_CF  | blue | na |
| chrUn | 3031557 | 3032073 | 517 SAT1_CF  | blue | na |
| chrUn | 3032161 | 3032662 | 502 SAT1_CF  | blue | na |
| chrUn | 3032680 | 3033356 | 677 SAT1_CF  | blue | na |
| chrUn | 3033370 | 3034628 | 1259 SAT1_CF | blue | na |
| chrUn | 3034715 | 3035997 | 1283 SAT1_CF | blue | na |
| chrUn | 3036016 | 3036556 | 541 SAT1_CF  | blue | na |
| chrUn | 3036589 | 3036752 | 164 SAT1_CF  | blue | na |
| chrUn | 3036774 | 3039447 | 2674 SAT1_CF | blue | na |
| chrUn | 3039628 | 3039809 | 182 SAT1_CF  | blue | na |
| chrUn | 3039869 | 3040349 | 481 SAT1_CF  | blue | na |
| chrUn | 3040362 | 3040467 | 106 SAT1_CF  | blue | na |
| chrUn | 3040490 | 3041711 | 1222 SAT1_CF | blue | na |
| chrUn | 3041776 | 3041912 | 137 SAT1_CF  | blue | na |
| chrUn | 3041978 | 3042564 | 587 SAT1_CF  | blue | na |
| chrUn | 3042620 | 3043410 | 791 SAT1_CF  | blue | na |
| chrUn | 3043452 | 3044119 | 668 SAT1_CF  | blue | na |
| chrUn | 3044155 | 3044497 | 343 SAT1_CF  | blue | na |

|       |         |         |              |      |    |
|-------|---------|---------|--------------|------|----|
| chrUn | 3044561 | 3046042 | 1482 SAT1_CF | blue | na |
| chrUn | 3046082 | 3046284 | 203 SAT1_CF  | blue | na |
| chrUn | 3046302 | 3046824 | 523 SAT1_CF  | blue | na |
| chrUn | 3046835 | 3047235 | 401 SAT1_CF  | blue | na |
| chrUn | 3047295 | 3047775 | 481 SAT1_CF  | blue | na |
| chrUn | 3047788 | 3049774 | 1987 SAT1_CF | blue | na |
| chrUn | 3049817 | 3050323 | 507 SAT1_CF  | blue | na |
| chrUn | 3050406 | 3050571 | 166 SAT1_CF  | blue | na |
| chrUn | 3050752 | 3050932 | 181 SAT1_CF  | blue | na |
| chrUn | 3050993 | 3051463 | 471 SAT1_CF  | blue | na |
| chrUn | 3051486 | 3053513 | 2028 SAT1_CF | blue | na |
| chrUn | 3053525 | 3054469 | 945 SAT1_CF  | blue | na |
| chrUn | 3054503 | 3055024 | 522 SAT1_CF  | blue | na |
| chrUn | 3055036 | 3055142 | 107 SAT1_CF  | blue | na |
| chrUn | 3055166 | 3055791 | 626 SAT1_CF  | blue | na |
| chrUn | 3055826 | 3056674 | 849 SAT1_CF  | blue | na |
| chrUn | 3056692 | 3057376 | 685 SAT1_CF  | blue | na |
| chrUn | 3057388 | 3058061 | 674 SAT1_CF  | blue | na |
| chrUn | 3058079 | 3058238 | 160 SAT1_CF  | blue | na |
| chrUn | 3058251 | 3060143 | 1893 SAT1_CF | blue | na |
| chrUn | 3060183 | 3060684 | 502 SAT1_CF  | blue | na |
| chrUn | 3060711 | 3062084 | 1374 SAT1_CF | blue | na |
| chrUn | 3062096 | 3062955 | 860 SAT1_CF  | blue | na |
| chrUn | 3063032 | 3063807 | 776 SAT1_CF  | blue | na |
| chrUn | 3063832 | 3064373 | 542 SAT1_CF  | blue | na |
| chrUn | 3064397 | 3065065 | 669 SAT1_CF  | blue | na |
| chrUn | 3065077 | 3065751 | 675 SAT1_CF  | blue | na |
| chrUn | 3065831 | 3066374 | 544 SAT1_CF  | blue | na |
| chrUn | 3066419 | 3066724 | 306 SAT1_CF  | blue | na |
| chrUn | 3066804 | 3067715 | 912 SAT1_CF  | blue | na |
| chrUn | 3067802 | 3068304 | 503 SAT1_CF  | blue | na |
| chrUn | 3068317 | 3070157 | 1841 SAT1_CF | blue | na |
| chrUn | 3070202 | 3070703 | 502 SAT1_CF  | blue | na |
| chrUn | 3070716 | 3071395 | 680 SAT1_CF  | blue | na |
| chrUn | 3071419 | 3072852 | 1434 SAT1_CF | blue | na |
| chrUn | 3072917 | 3073478 | 562 SAT1_CF  | blue | na |
| chrUn | 3073520 | 3074071 | 552 SAT1_CF  | blue | na |
| chrUn | 3074084 | 3074759 | 676 SAT1_CF  | blue | na |
| chrUn | 3074802 | 3076625 | 1824 SAT1_CF | blue | na |
| chrUn | 3076664 | 3077162 | 499 SAT1_CF  | blue | na |
| chrUn | 3077175 | 3077781 | 607 SAT1_CF  | blue | na |
| chrUn | 3077793 | 3078468 | 676 SAT1_CF  | blue | na |

|       |         |         |              |      |    |
|-------|---------|---------|--------------|------|----|
| chrUn | 3078484 | 3079167 | 684 SAT1_CF  | blue | na |
| chrUn | 3079253 | 3079351 | 99 SAT1_CF   | blue | na |
| chrUn | 3079376 | 3079818 | 443 SAT1_CF  | blue | na |
| chrUn | 3079854 | 3080409 | 556 SAT1_CF  | blue | na |
| chrUn | 3080421 | 3081454 | 1034 SAT1_CF | blue | na |
| chrUn | 3081492 | 3081990 | 499 SAT1_CF  | blue | na |
| chrUn | 3082004 | 3082687 | 684 SAT1_CF  | blue | na |
| chrUn | 3082699 | 3084077 | 1379 SAT1_CF | blue | na |
| chrUn | 3084120 | 3084709 | 590 SAT1_CF  | blue | na |
| chrUn | 3084738 | 3085481 | 744 SAT1_CF  | blue | na |
| chrUn | 3085560 | 3086521 | 962 SAT1_CF  | blue | na |
| chrUn | 3086561 | 3087062 | 502 SAT1_CF  | blue | na |
| chrUn | 3087075 | 3087755 | 681 SAT1_CF  | blue | na |
| chrUn | 3087767 | 3088589 | 823 SAT1_CF  | blue | na |
| chrUn | 3088665 | 3090467 | 1803 SAT1_CF | blue | na |
| chrUn | 3090522 | 3091024 | 503 SAT1_CF  | blue | na |
| chrUn | 3091037 | 3091141 | 105 SAT1_CF  | blue | na |
| chrUn | 3091165 | 3091966 | 802 SAT1_CF  | blue | na |
| chrUn | 3091988 | 3092083 | 96 SAT1_CF   | blue | na |
| chrUn | 3092107 | 3092909 | 803 SAT1_CF  | blue | na |
| chrUn | 3092922 | 3093037 | 116 SAT1_CF  | blue | na |
| chrUn | 3093050 | 3093853 | 804 SAT1_CF  | blue | na |
| chrUn | 3093866 | 3093974 | 109 SAT1_CF  | blue | na |
| chrUn | 3093995 | 3094744 | 750 SAT1_CF  | blue | na |
| chrUn | 3094766 | 3096757 | 1992 SAT1_CF | blue | na |
| chrUn | 3096800 | 3097431 | 632 SAT1_CF  | blue | na |
| chrUn | 3097459 | 3098863 | 1405 SAT1_CF | blue | na |
| chrUn | 3098897 | 3099382 | 486 SAT1_CF  | blue | na |
| chrUn | 3099409 | 3100747 | 1339 SAT1_CF | blue | na |
| chrUn | 3100761 | 3100937 | 177 SAT1_CF  | blue | na |
| chrUn | 3100950 | 3101633 | 684 SAT1_CF  | blue | na |
| chrUn | 3101645 | 3102498 | 854 SAT1_CF  | blue | na |
| chrUn | 3102548 | 3103364 | 817 SAT1_CF  | blue | na |
| chrUn | 3103408 | 3103916 | 509 SAT1_CF  | blue | na |
| chrUn | 3103930 | 3104284 | 355 SAT1_CF  | blue | na |
| chrUn | 3104392 | 3104950 | 559 SAT1_CF  | blue | na |
| chrUn | 3104978 | 3106874 | 1897 SAT1_CF | blue | na |
| chrUn | 3106918 | 3107480 | 563 SAT1_CF  | blue | na |
| chrUn | 3107523 | 3107717 | 195 SAT1_CF  | blue | na |
| chrUn | 3107745 | 3108241 | 497 SAT1_CF  | blue | na |
| chrUn | 3108911 | 3109485 | 575 SAT1_CF  | blue | na |
| chrUn | 3109528 | 3110645 | 1118 SAT1_CF | blue | na |

|       |         |         |              |      |    |
|-------|---------|---------|--------------|------|----|
| chrUn | 3110660 | 3111021 | 362 SAT1_CF  | blue | na |
| chrUn | 3111077 | 3111559 | 483 SAT1_CF  | blue | na |
| chrUn | 3111572 | 3112247 | 676 SAT1_CF  | blue | na |
| chrUn | 3112290 | 3113290 | 1001 SAT1_CF | blue | na |
| chrUn | 3113305 | 3113925 | 621 SAT1_CF  | blue | na |
| chrUn | 3113937 | 3115396 | 1460 SAT1_CF | blue | na |
| chrUn | 3115427 | 3115933 | 507 SAT1_CF  | blue | na |
| chrUn | 3115966 | 3116123 | 158 SAT1_CF  | blue | na |
| chrUn | 3116168 | 3116667 | 500 SAT1_CF  | blue | na |
| chrUn | 3116680 | 3116755 | 76 SAT1_CF   | blue | na |
| chrUn | 3116810 | 3118119 | 1310 SAT1_CF | blue | na |
| chrUn | 3118162 | 3118794 | 633 SAT1_CF  | blue | na |
| chrUn | 3118822 | 3119436 | 615 SAT1_CF  | blue | na |
| chrUn | 3119465 | 3119989 | 525 SAT1_CF  | blue | na |
| chrUn | 3120000 | 3120160 | 161 SAT1_CF  | blue | na |
| chrUn | 3120205 | 3121401 | 1197 SAT1_CF | blue | na |
| chrUn | 3121413 | 3122265 | 853 SAT1_CF  | blue | na |
| chrUn | 3122303 | 3122851 | 549 SAT1_CF  | blue | na |
| chrUn | 3122930 | 3123095 | 166 SAT1_CF  | blue | na |
| chrUn | 3123276 | 3123461 | 186 SAT1_CF  | blue | na |
| chrUn | 3123478 | 3123997 | 520 SAT1_CF  | blue | na |
| chrUn | 3124010 | 3124119 | 110 SAT1_CF  | blue | na |
| chrUn | 3124139 | 3124696 | 558 SAT1_CF  | blue | na |
| chrUn | 3124708 | 3127412 | 2705 SAT1_CF | blue | na |
| chrUn | 3127499 | 3127997 | 499 SAT1_CF  | blue | na |
| chrUn | 3128010 | 3128115 | 106 SAT1_CF  | blue | na |
| chrUn | 3128138 | 3129313 | 1176 SAT1_CF | blue | na |
| chrUn | 3129346 | 3129502 | 157 SAT1_CF  | blue | na |
| chrUn | 3129547 | 3130046 | 500 SAT1_CF  | blue | na |
| chrUn | 3130059 | 3130163 | 105 SAT1_CF  | blue | na |
| chrUn | 3130184 | 3130737 | 554 SAT1_CF  | blue | na |
| chrUn | 3130749 | 3131660 | 912 SAT1_CF  | blue | na |
| chrUn | 3131681 | 3133060 | 1380 SAT1_CF | blue | na |
| chrUn | 3133105 | 3134307 | 1203 SAT1_CF | blue | na |
| chrUn | 3134319 | 3135110 | 792 SAT1_CF  | blue | na |
| chrUn | 3135157 | 3135705 | 549 SAT1_CF  | blue | na |
| chrUn | 3135732 | 3136102 | 371 SAT1_CF  | blue | na |
| chrUn | 3136136 | 3136656 | 521 SAT1_CF  | blue | na |
| chrUn | 3136698 | 3138493 | 1796 SAT1_CF | blue | na |
| chrUn | 3138520 | 3138890 | 371 SAT1_CF  | blue | na |
| chrUn | 3138924 | 3139444 | 521 SAT1_CF  | blue | na |
| chrUn | 3139486 | 3139798 | 313 SAT1_CF  | blue | na |

|       |         |         |              |      |    |
|-------|---------|---------|--------------|------|----|
| chrUn | 3139840 | 3140485 | 646 SAT1_CF  | blue | na |
| chrUn | 3140534 | 3141279 | 746 SAT1_CF  | blue | na |
| chrUn | 3141293 | 3141681 | 389 SAT1_CF  | blue | na |
| chrUn | 3141715 | 3142236 | 522 SAT1_CF  | blue | na |
| chrUn | 3142258 | 3142892 | 635 SAT1_CF  | blue | na |
| chrUn | 3142905 | 3144008 | 1104 SAT1_CF | blue | na |
| chrUn | 3144034 | 3144640 | 607 SAT1_CF  | blue | na |
| chrUn | 3144651 | 3145143 | 493 SAT1_CF  | blue | na |
| chrUn | 3145157 | 3146521 | 1365 SAT1_CF | blue | na |
| chrUn | 3146586 | 3147148 | 563 SAT1_CF  | blue | na |
| chrUn | 3147191 | 3147743 | 553 SAT1_CF  | blue | na |
| chrUn | 3147754 | 3148365 | 612 SAT1_CF  | blue | na |
| chrUn | 3148388 | 3149054 | 667 SAT1_CF  | blue | na |
| chrUn | 3149097 | 3149726 | 630 SAT1_CF  | blue | na |
| chrUn | 3170038 | 3170669 | 632 SAT1_CF  | blue | na |
| chrUn | 3170712 | 3171675 | 964 SAT1_CF  | blue | na |
| chrUn | 3171711 | 3172752 | 1042 SAT1_CF | blue | na |
| chrUn | 3172792 | 3173293 | 502 SAT1_CF  | blue | na |
| chrUn | 3173306 | 3174146 | 841 SAT1_CF  | blue | na |
| chrUn | 3174158 | 3175309 | 1152 SAT1_CF | blue | na |
| chrUn | 3175444 | 3176979 | 1536 SAT1_CF | blue | na |
| chrUn | 3176991 | 3178212 | 1222 SAT1_CF | blue | na |
| chrUn | 3178282 | 3178990 | 709 SAT1_CF  | blue | na |
| chrUn | 3179002 | 3180092 | 1091 SAT1_CF | blue | na |
| chrUn | 3180120 | 3180644 | 525 SAT1_CF  | blue | na |
| chrUn | 3180659 | 3180816 | 158 SAT1_CF  | blue | na |
| chrUn | 3180861 | 3181380 | 520 SAT1_CF  | blue | na |
| chrUn | 3181398 | 3182095 | 698 SAT1_CF  | blue | na |
| chrUn | 3182107 | 3183862 | 1756 SAT1_CF | blue | na |
| chrUn | 3183895 | 3184238 | 344 SAT1_CF  | blue | na |
| chrUn | 3184255 | 3184775 | 521 SAT1_CF  | blue | na |
| chrUn | 3184788 | 3185556 | 769 SAT1_CF  | blue | na |
| chrUn | 3185612 | 3186322 | 711 SAT1_CF  | blue | na |
| chrUn | 3186334 | 3187974 | 1641 SAT1_CF | blue | na |
| chrUn | 3188054 | 3188602 | 549 SAT1_CF  | blue | na |
| chrUn | 3188613 | 3189015 | 403 SAT1_CF  | blue | na |
| chrUn | 3189054 | 3189556 | 503 SAT1_CF  | blue | na |
| chrUn | 3189569 | 3189645 | 77 SAT1_CF   | blue | na |
| chrUn | 3189698 | 3190331 | 634 SAT1_CF  | blue | na |
| chrUn | 3190366 | 3190866 | 501 SAT1_CF  | blue | na |
| chrUn | 3190983 | 3192116 | 1134 SAT1_CF | blue | na |
| chrUn | 3192128 | 3193312 | 1185 SAT1_CF | blue | na |

|       |         |         |              |      |    |
|-------|---------|---------|--------------|------|----|
| chrUn | 3193359 | 3193730 | 372 SAT1_CF  | blue | na |
| chrUn | 3193785 | 3194374 | 590 SAT1_CF  | blue | na |
| chrUn | 3194387 | 3196633 | 2247 SAT1_CF | blue | na |
| chrUn | 3196712 | 3197250 | 539 SAT1_CF  | blue | na |
| chrUn | 3197268 | 3197622 | 355 SAT1_CF  | blue | na |
| chrUn | 3197728 | 3198294 | 567 SAT1_CF  | blue | na |
| chrUn | 3198316 | 3200213 | 1898 SAT1_CF | blue | na |
| chrUn | 3200257 | 3202198 | 1942 SAT1_CF | blue | na |
| chrUn | 3202234 | 3202634 | 401 SAT1_CF  | blue | na |
| chrUn | 3202655 | 3203174 | 520 SAT1_CF  | blue | na |
| chrUn | 3203187 | 3203295 | 109 SAT1_CF  | blue | na |
| chrUn | 3203316 | 3203861 | 546 SAT1_CF  | blue | na |
| chrUn | 3203904 | 3204868 | 965 SAT1_CF  | blue | na |
| chrUn | 3204947 | 3205495 | 549 SAT1_CF  | blue | na |
| chrUn | 3205539 | 3206229 | 691 SAT1_CF  | blue | na |
| chrUn | 3206241 | 3207543 | 1303 SAT1_CF | blue | na |
| chrUn | 3207571 | 3208271 | 701 SAT1_CF  | blue | na |
| chrUn | 3208284 | 3208966 | 683 SAT1_CF  | blue | na |
| chrUn | 3208978 | 3209655 | 678 SAT1_CF  | blue | na |
| chrUn | 3209698 | 3210658 | 961 SAT1_CF  | blue | na |
| chrUn | 3210725 | 3211245 | 521 SAT1_CF  | blue | na |
| chrUn | 3211258 | 3211446 | 189 SAT1_CF  | blue | na |
| chrUn | 3211498 | 3212257 | 760 SAT1_CF  | blue | na |
| chrUn | 3212334 | 3212881 | 548 SAT1_CF  | blue | na |
| chrUn | 3212892 | 3213246 | 355 SAT1_CF  | blue | na |
| chrUn | 3213332 | 3213834 | 503 SAT1_CF  | blue | na |
| chrUn | 3213847 | 3214531 | 685 SAT1_CF  | blue | na |
| chrUn | 3214543 | 3215206 | 664 SAT1_CF  | blue | na |
| chrUn | 3215267 | 3216139 | 873 SAT1_CF  | blue | na |
| chrUn | 3216166 | 3216841 | 676 SAT1_CF  | blue | na |
| chrUn | 3216859 | 3218045 | 1187 SAT1_CF | blue | na |
| chrUn | 3218073 | 3218231 | 159 SAT1_CF  | blue | na |
| chrUn | 3218257 | 3218775 | 519 SAT1_CF  | blue | na |
| chrUn | 3218801 | 3220159 | 1359 SAT1_CF | blue | na |
| chrUn | 3220206 | 3220317 | 112 SAT1_CF  | blue | na |
| chrUn | 3220402 | 3221075 | 674 SAT1_CF  | blue | na |
| chrUn | 3221117 | 3222719 | 1603 SAT1_CF | blue | na |
| chrUn | 3222753 | 3224183 | 1431 SAT1_CF | blue | na |
| chrUn | 3224226 | 3224764 | 539 SAT1_CF  | blue | na |
| chrUn | 3224780 | 3225852 | 1073 SAT1_CF | blue | na |
| chrUn | 3225882 | 3226261 | 380 SAT1_CF  | blue | na |
| chrUn | 3226283 | 3226803 | 521 SAT1_CF  | blue | na |

|       |         |         |              |      |    |
|-------|---------|---------|--------------|------|----|
| chrUn | 3226815 | 3226924 | 110 SAT1_CF  | blue | na |
| chrUn | 3226945 | 3227577 | 633 SAT1_CF  | blue | na |
| chrUn | 3227589 | 3228256 | 668 SAT1_CF  | blue | na |
| chrUn | 3228313 | 3228858 | 546 SAT1_CF  | blue | na |
| chrUn | 3228901 | 3229442 | 542 SAT1_CF  | blue | na |
| chrUn | 3229464 | 3229560 | 97 SAT1_CF   | blue | na |
| chrUn | 3229581 | 3230135 | 555 SAT1_CF  | blue | na |
| chrUn | 3230147 | 3230821 | 675 SAT1_CF  | blue | na |
| chrUn | 3230871 | 3231832 | 962 SAT1_CF  | blue | na |
| chrUn | 3231901 | 3232418 | 518 SAT1_CF  | blue | na |
| chrUn | 3232483 | 3233042 | 560 SAT1_CF  | blue | na |
| chrUn | 3233054 | 3235731 | 2678 SAT1_CF | blue | na |
| chrUn | 3235774 | 3236200 | 427 SAT1_CF  | blue | na |
| chrUn | 3236213 | 3236755 | 543 SAT1_CF  | blue | na |
| chrUn | 3236767 | 3237449 | 683 SAT1_CF  | blue | na |
| chrUn | 3237461 | 3238138 | 678 SAT1_CF  | blue | na |
| chrUn | 3238158 | 3238996 | 839 SAT1_CF  | blue | na |
| chrUn | 3239009 | 3240197 | 1189 SAT1_CF | blue | na |
| chrUn | 3240209 | 3241368 | 1160 SAT1_CF | blue | na |
| chrUn | 3241388 | 3241997 | 610 SAT1_CF  | blue | na |
| chrUn | 3242077 | 3242241 | 165 SAT1_CF  | blue | na |
| chrUn | 3242423 | 3242608 | 186 SAT1_CF  | blue | na |
| chrUn | 3242644 | 3243223 | 580 SAT1_CF  | blue | na |
| chrUn | 3243285 | 3244557 | 1273 SAT1_CF | blue | na |
| chrUn | 3244572 | 3244714 | 143 SAT1_CF  | blue | na |
| chrUn | 3244774 | 3245350 | 577 SAT1_CF  | blue | na |
| chrUn | 3245372 | 3245470 | 99 SAT1_CF   | blue | na |
| chrUn | 3245491 | 3246046 | 556 SAT1_CF  | blue | na |
| chrUn | 3246058 | 3246920 | 863 SAT1_CF  | blue | na |
| chrUn | 3246962 | 3247593 | 632 SAT1_CF  | blue | na |
| chrUn | 3247621 | 3248625 | 1005 SAT1_CF | blue | na |
| chrUn | 3248659 | 3249008 | 350 SAT1_CF  | blue | na |
| chrUn | 3249064 | 3250292 | 1229 SAT1_CF | blue | na |
| chrUn | 3250304 | 3250987 | 684 SAT1_CF  | blue | na |
| chrUn | 3250998 | 3251490 | 493 SAT1_CF  | blue | na |
| chrUn | 3251504 | 3252219 | 716 SAT1_CF  | blue | na |
| chrUn | 3252262 | 3252799 | 538 SAT1_CF  | blue | na |
| chrUn | 3252867 | 3254202 | 1336 SAT1_CF | blue | na |
| chrUn | 3254225 | 3254768 | 544 SAT1_CF  | blue | na |
| chrUn | 3254811 | 3256289 | 1479 SAT1_CF | blue | na |
| chrUn | 3256335 | 3256876 | 542 SAT1_CF  | blue | na |
| chrUn | 3256889 | 3257391 | 503 SAT1_CF  | blue | na |



|       |         |         |              |      |    |
|-------|---------|---------|--------------|------|----|
| chrUn | 3257404 | 3257479 | 76 SAT1_CF   | blue | na |
| chrUn | 3257498 | 3258052 | 555 SAT1_CF  | blue | na |
| chrUn | 3258065 | 3258707 | 643 SAT1_CF  | blue | na |
| chrUn | 3258750 | 3259291 | 542 SAT1_CF  | blue | na |
| chrUn | 3259309 | 3259426 | 118 SAT1_CF  | blue | na |
| chrUn | 3259492 | 3259994 | 503 SAT1_CF  | blue | na |
| chrUn | 3260006 | 3260111 | 106 SAT1_CF  | blue | na |
| chrUn | 3260135 | 3260937 | 803 SAT1_CF  | blue | na |
| chrUn | 3260950 | 3261058 | 109 SAT1_CF  | blue | na |
| chrUn | 3261079 | 3261828 | 750 SAT1_CF  | blue | na |
| chrUn | 3261850 | 3263055 | 1206 SAT1_CF | blue | na |
| chrUn | 3263098 | 3264430 | 1333 SAT1_CF | blue | na |
| chrUn | 3264547 | 3265088 | 542 SAT1_CF  | blue | na |
| chrUn | 3265100 | 3265213 | 114 SAT1_CF  | blue | na |
| chrUn | 3265229 | 3265776 | 548 SAT1_CF  | blue | na |
| chrUn | 3265819 | 3266353 | 535 SAT1_CF  | blue | na |
| chrUn | 3266367 | 3269163 | 2797 SAT1_CF | blue | na |
| chrUn | 3270825 | 3271286 | 462 SAT1_CF  | blue | na |
| chrUn | 3271298 | 3273171 | 1874 SAT1_CF | blue | na |
| chrUn | 3321828 | 3322133 | 306 SAT1_CF  | blue | na |
| chrUn | 3322203 | 3322721 | 519 SAT1_CF  | blue | na |
| chrUn | 3322786 | 3323344 | 559 SAT1_CF  | blue | na |
| chrUn | 3323356 | 3324938 | 1583 SAT1_CF | blue | na |
| chrUn | 3324966 | 3325104 | 139 SAT1_CF  | blue | na |
| chrUn | 3325828 | 3327256 | 1429 SAT1_CF | blue | na |
| chrUn | 3327269 | 3327376 | 108 SAT1_CF  | blue | na |
| chrUn | 3327398 | 3327773 | 376 SAT1_CF  | blue | na |
| chrUn | 3328063 | 3330479 | 2417 SAT1_CF | blue | na |
| chrUn | 3331891 | 3332466 | 576 SAT1_CF  | blue | na |
| chrUn | 3332509 | 3333633 | 1125 SAT1_CF | blue | na |
| chrUn | 3333648 | 3334047 | 400 SAT1_CF  | blue | na |
| chrUn | 3334066 | 3334581 | 516 SAT1_CF  | blue | na |
| chrUn | 3334594 | 3334699 | 106 SAT1_CF  | blue | na |
| chrUn | 3334722 | 3335274 | 553 SAT1_CF  | blue | na |
| chrUn | 3335355 | 3335879 | 525 SAT1_CF  | blue | na |
| chrUn | 3335894 | 3336029 | 136 SAT1_CF  | blue | na |
| chrUn | 3336076 | 3336595 | 520 SAT1_CF  | blue | na |
| chrUn | 3336608 | 3337280 | 673 SAT1_CF  | blue | na |
| chrUn | 3337323 | 3339313 | 1991 SAT1_CF | blue | na |
| chrUn | 3339432 | 3339952 | 521 SAT1_CF  | blue | na |
| chrUn | 3340009 | 3340740 | 732 SAT1_CF  | blue | na |
| chrUn | 3340810 | 3342189 | 1380 SAT1_CF | blue | na |

|       |         |         |              |      |    |
|-------|---------|---------|--------------|------|----|
| chrUn | 3342215 | 3343437 | 1223 SAT1_CF | blue | na |
| chrUn | 3343449 | 3344806 | 1358 SAT1_CF | blue | na |
| chrUn | 3344819 | 3345171 | 353 SAT1_CF  | blue | na |
| chrUn | 3345287 | 3345806 | 520 SAT1_CF  | blue | na |
| chrUn | 3345863 | 3346412 | 550 SAT1_CF  | blue | na |
| chrUn | 3346454 | 3346998 | 545 SAT1_CF  | blue | na |
| chrUn | 3347040 | 3347322 | 283 SAT1_CF  | blue | na |
| chrUn | 3347353 | 3347859 | 507 SAT1_CF  | blue | na |
| chrUn | 3347873 | 3348275 | 403 SAT1_CF  | blue | na |
| chrUn | 3348315 | 3348816 | 502 SAT1_CF  | blue | na |
| chrUn | 3348843 | 3349587 | 745 SAT1_CF  | blue | na |
| chrUn | 3349601 | 3350213 | 613 SAT1_CF  | blue | na |
| chrUn | 3350225 | 3350910 | 686 SAT1_CF  | blue | na |
| chrUn | 3350922 | 3351593 | 672 SAT1_CF  | blue | na |
| chrUn | 3351642 | 3352142 | 501 SAT1_CF  | blue | na |
| chrUn | 3352153 | 3352246 | 94 SAT1_CF   | blue | na |
| chrUn | 3352276 | 3353527 | 1252 SAT1_CF | blue | na |
| chrUn | 3353538 | 3353613 | 76 SAT1_CF   | blue | na |
| chrUn | 3353669 | 3354142 | 474 SAT1_CF  | blue | na |
| chrUn | 3354161 | 3354257 | 97 SAT1_CF   | blue | na |
| chrUn | 3354281 | 3354833 | 553 SAT1_CF  | blue | na |
| chrUn | 3354845 | 3355710 | 866 SAT1_CF  | blue | na |
| chrUn | 3355752 | 3357593 | 1842 SAT1_CF | blue | na |
| chrUn | 3357604 | 3358128 | 525 SAT1_CF  | blue | na |
| chrUn | 3358172 | 3359283 | 1112 SAT1_CF | blue | na |
| chrUn | 3359445 | 3360030 | 586 SAT1_CF  | blue | na |
| chrUn | 3360047 | 3361271 | 1225 SAT1_CF | blue | na |
| chrUn | 3361283 | 3362742 | 1460 SAT1_CF | blue | na |
| chrUn | 3362780 | 3363327 | 548 SAT1_CF  | blue | na |
| chrUn | 3363342 | 3363684 | 343 SAT1_CF  | blue | na |
| chrUn | 3363741 | 3364242 | 502 SAT1_CF  | blue | na |
| chrUn | 3364256 | 3364937 | 682 SAT1_CF  | blue | na |
| chrUn | 3364950 | 3366110 | 1161 SAT1_CF | blue | na |
| chrUn | 3366130 | 3366740 | 611 SAT1_CF  | blue | na |
| chrUn | 3366819 | 3366984 | 166 SAT1_CF  | blue | na |
| chrUn | 3367165 | 3367350 | 186 SAT1_CF  | blue | na |
| chrUn | 3367367 | 3367887 | 521 SAT1_CF  | blue | na |
| chrUn | 3367900 | 3368006 | 107 SAT1_CF  | blue | na |
| chrUn | 3368028 | 3368585 | 558 SAT1_CF  | blue | na |
| chrUn | 3368597 | 3370280 | 1684 SAT1_CF | blue | na |
| chrUn | 3370394 | 3371307 | 914 SAT1_CF  | blue | na |
| chrUn | 3371393 | 3371892 | 500 SAT1_CF  | blue | na |

|       |         |         |              |      |    |
|-------|---------|---------|--------------|------|----|
| chrUn | 3371905 | 3372010 | 106 SAT1_CF  | blue | na |
| chrUn | 3372033 | 3373208 | 1176 SAT1_CF | blue | na |
| chrUn | 3373241 | 3373397 | 157 SAT1_CF  | blue | na |
| chrUn | 3373442 | 3373942 | 501 SAT1_CF  | blue | na |
| chrUn | 3373955 | 3374753 | 799 SAT1_CF  | blue | na |
| chrUn | 3374779 | 3375324 | 546 SAT1_CF  | blue | na |
| chrUn | 3375404 | 3375928 | 525 SAT1_CF  | blue | na |
| chrUn | 3375943 | 3376762 | 820 SAT1_CF  | blue | na |
| chrUn | 3376787 | 3378801 | 2015 SAT1_CF | blue | na |
| chrUn | 3378844 | 3379649 | 806 SAT1_CF  | blue | na |
| chrUn | 3379680 | 3380841 | 1162 SAT1_CF | blue | na |
| chrUn | 3380884 | 3381382 | 499 SAT1_CF  | blue | na |
| chrUn | 3381395 | 3382075 | 681 SAT1_CF  | blue | na |
| chrUn | 3382089 | 3382847 | 759 SAT1_CF  | blue | na |
| chrUn | 3382861 | 3384193 | 1333 SAT1_CF | blue | na |
| chrUn | 3384218 | 3384576 | 359 SAT1_CF  | blue | na |
| chrUn | 3384620 | 3385167 | 548 SAT1_CF  | blue | na |
| chrUn | 3385181 | 3385842 | 662 SAT1_CF  | blue | na |
| chrUn | 3385885 | 3386512 | 628 SAT1_CF  | blue | na |
| chrUn | 3386540 | 3387745 | 1206 SAT1_CF | blue | na |
| chrUn | 3387809 | 3387915 | 107 SAT1_CF  | blue | na |
| chrUn | 3387942 | 3388460 | 519 SAT1_CF  | blue | na |
| chrUn | 3388473 | 3388580 | 108 SAT1_CF  | blue | na |
| chrUn | 3388602 | 3389156 | 555 SAT1_CF  | blue | na |
| chrUn | 3389168 | 3389849 | 682 SAT1_CF  | blue | na |
| chrUn | 3389863 | 3390723 | 861 SAT1_CF  | blue | na |
| chrUn | 3390765 | 3391309 | 545 SAT1_CF  | blue | na |
| chrUn | 3391347 | 3392622 | 1276 SAT1_CF | blue | na |
| chrUn | 3392662 | 3393162 | 501 SAT1_CF  | blue | na |
| chrUn | 3393175 | 3393858 | 684 SAT1_CF  | blue | na |
| chrUn | 3393870 | 3394548 | 679 SAT1_CF  | blue | na |
| chrUn | 3394593 | 3395554 | 962 SAT1_CF  | blue | na |
| chrUn | 3395633 | 3396555 | 923 SAT1_CF  | blue | na |
| chrUn | 3396595 | 3397097 | 503 SAT1_CF  | blue | na |
| chrUn | 3397109 | 3398018 | 910 SAT1_CF  | blue | na |
| chrUn | 3398046 | 3398591 | 546 SAT1_CF  | blue | na |
| chrUn | 3398670 | 3399192 | 523 SAT1_CF  | blue | na |
| chrUn | 3399207 | 3399908 | 702 SAT1_CF  | blue | na |
| chrUn | 3399920 | 3400036 | 117 SAT1_CF  | blue | na |
| chrUn | 3400050 | 3400760 | 711 SAT1_CF  | blue | na |
| chrUn | 3400772 | 3401633 | 862 SAT1_CF  | blue | na |
| chrUn | 3401675 | 3402711 | 1037 SAT1_CF | blue | na |

|       |         |         |              |      |    |
|-------|---------|---------|--------------|------|----|
| chrUn | 3402793 | 3403301 | 509 SAT1_CF  | blue | na |
| chrUn | 3403329 | 3403570 | 242 SAT1_CF  | blue | na |
| chrUn | 3403604 | 3404969 | 1366 SAT1_CF | blue | na |
| chrUn | 3404982 | 3405058 | 77 SAT1_CF   | blue | na |
| chrUn | 3405111 | 3405639 | 529 SAT1_CF  | blue | na |
| chrUn | 3405651 | 3406950 | 1300 SAT1_CF | blue | na |
| chrUn | 3407039 | 3407772 | 734 SAT1_CF  | blue | na |
| chrUn | 3407788 | 3408190 | 403 SAT1_CF  | blue | na |
| chrUn | 3408230 | 3408731 | 502 SAT1_CF  | blue | na |
| chrUn | 3408744 | 3409967 | 1224 SAT1_CF | blue | na |
| chrUn | 3410033 | 3410761 | 729 SAT1_CF  | blue | na |
| chrUn | 3410789 | 3410925 | 137 SAT1_CF  | blue | na |
| chrUn | 3410991 | 3411492 | 502 SAT1_CF  | blue | na |
| chrUn | 3411519 | 3412352 | 834 SAT1_CF  | blue | na |
| chrUn | 3412373 | 3413610 | 1238 SAT1_CF | blue | na |
| chrUn | 3413653 | 3414947 | 1295 SAT1_CF | blue | na |
| chrUn | 3414965 | 3415722 | 758 SAT1_CF  | blue | na |
| chrUn | 3415733 | 3416356 | 624 SAT1_CF  | blue | na |
| chrUn | 3416399 | 3417920 | 1522 SAT1_CF | blue | na |
| chrUn | 3418102 | 3418327 | 226 SAT1_CF  | blue | na |
| chrUn | 3418349 | 3419015 | 667 SAT1_CF  | blue | na |
| chrUn | 3419058 | 3420059 | 1002 SAT1_CF | blue | na |
| chrUn | 3420091 | 3420612 | 522 SAT1_CF  | blue | na |
| chrUn | 3420625 | 3421027 | 403 SAT1_CF  | blue | na |
| chrUn | 3421067 | 3421569 | 503 SAT1_CF  | blue | na |
| chrUn | 3421582 | 3422429 | 848 SAT1_CF  | blue | na |
| chrUn | 3422450 | 3422571 | 122 SAT1_CF  | blue | na |
| chrUn | 3422812 | 3424029 | 1218 SAT1_CF | blue | na |
| chrUn | 3424045 | 3424443 | 399 SAT1_CF  | blue | na |
| chrUn | 3424464 | 3424984 | 521 SAT1_CF  | blue | na |
| chrUn | 3424996 | 3425672 | 677 SAT1_CF  | blue | na |
| chrUn | 3425715 | 3427308 | 1594 SAT1_CF | blue | na |
| chrUn | 3427320 | 3428200 | 881 SAT1_CF  | blue | na |
| chrUn | 3429360 | 3429849 | 490 SAT1_CF  | blue | na |
| chrUn | 3429894 | 3430396 | 503 SAT1_CF  | blue | na |
| chrUn | 3430416 | 3430517 | 102 SAT1_CF  | blue | na |
| chrUn | 3430538 | 3431090 | 553 SAT1_CF  | blue | na |
| chrUn | 3431133 | 3432475 | 1343 SAT1_CF | blue | na |
| chrUn | 3432492 | 3433137 | 646 SAT1_CF  | blue | na |
| chrUn | 3433318 | 3434494 | 1177 SAT1_CF | blue | na |
| chrUn | 3434536 | 3435912 | 1377 SAT1_CF | blue | na |
| chrUn | 3435955 | 3436452 | 498 SAT1_CF  | blue | na |

|       |         |         |              |      |    |
|-------|---------|---------|--------------|------|----|
| chrUn | 3436470 | 3436572 | 103 SAT1_CF  | blue | na |
| chrUn | 3436593 | 3437148 | 556 SAT1_CF  | blue | na |
| chrUn | 3437161 | 3438434 | 1274 SAT1_CF | blue | na |
| chrUn | 3438519 | 3439021 | 503 SAT1_CF  | blue | na |
| chrUn | 3439034 | 3439140 | 107 SAT1_CF  | blue | na |
| chrUn | 3439162 | 3439707 | 546 SAT1_CF  | blue | na |
| chrUn | 3439777 | 3440240 | 464 SAT1_CF  | blue | na |
| chrUn | 3440252 | 3441759 | 1508 SAT1_CF | blue | na |
| chrUn | 3441796 | 3442948 | 1153 SAT1_CF | blue | na |
| chrUn | 3443027 | 3443570 | 544 SAT1_CF  | blue | na |
| chrUn | 3443613 | 3443986 | 374 SAT1_CF  | blue | na |
| chrUn | 3444003 | 3444523 | 521 SAT1_CF  | blue | na |
| chrUn | 3444541 | 3447008 | 2468 SAT1_CF | blue | na |
| chrUn | 3447046 | 3447545 | 500 SAT1_CF  | blue | na |
| chrUn | 3447558 | 3447665 | 108 SAT1_CF  | blue | na |
| chrUn | 3447686 | 3448241 | 556 SAT1_CF  | blue | na |
| chrUn | 3448253 | 3450395 | 2143 SAT1_CF | blue | na |
| chrUn | 3450406 | 3451696 | 1291 SAT1_CF | blue | na |
| chrUn | 3451739 | 3452465 | 727 SAT1_CF  | blue | na |
| chrUn | 3452510 | 3453045 | 536 SAT1_CF  | blue | na |
| chrUn | 3453072 | 3453584 | 513 SAT1_CF  | blue | na |
| chrUn | 3453596 | 3454909 | 1314 SAT1_CF | blue | na |
| chrUn | 3454922 | 3455757 | 836 SAT1_CF  | blue | na |
| chrUn | 3455779 | 3456473 | 695 SAT1_CF  | blue | na |
| chrUn | 3456485 | 3458973 | 2489 SAT1_CF | blue | na |
| chrUn | 3459061 | 3459562 | 502 SAT1_CF  | blue | na |
| chrUn | 3459575 | 3460257 | 683 SAT1_CF  | blue | na |
| chrUn | 3460270 | 3460341 | 72 SAT1_CF   | blue | na |
| chrUn | 3460364 | 3460913 | 550 SAT1_CF  | blue | na |
| chrUn | 3460931 | 3462151 | 1221 SAT1_CF | blue | na |
| chrUn | 3462180 | 3462336 | 157 SAT1_CF  | blue | na |
| chrUn | 3462381 | 3462883 | 503 SAT1_CF  | blue | na |
| chrUn | 3462896 | 3464035 | 1140 SAT1_CF | blue | na |
| chrUn | 3464077 | 3464858 | 782 SAT1_CF  | blue | na |
| chrUn | 3464902 | 3465821 | 920 SAT1_CF  | blue | na |
| chrUn | 3465880 | 3466360 | 481 SAT1_CF  | blue | na |
| chrUn | 3466373 | 3466481 | 109 SAT1_CF  | blue | na |
| chrUn | 3466502 | 3467056 | 555 SAT1_CF  | blue | na |
| chrUn | 3467068 | 3467745 | 678 SAT1_CF  | blue | na |
| chrUn | 3467842 | 3468384 | 543 SAT1_CF  | blue | na |
| chrUn | 3468409 | 3468753 | 345 SAT1_CF  | blue | na |
| chrUn | 3468848 | 3470175 | 1328 SAT1_CF | blue | na |

|       |         |         |              |      |    |
|-------|---------|---------|--------------|------|----|
| chrUn | 3470187 | 3470872 | 686 SAT1_CF  | blue | na |
| chrUn | 3470884 | 3472685 | 1802 SAT1_CF | blue | na |
| chrUn | 3472706 | 3473592 | 887 SAT1_CF  | blue | na |
| chrUn | 3473679 | 3474171 | 493 SAT1_CF  | blue | na |
| chrUn | 3474191 | 3474298 | 108 SAT1_CF  | blue | na |
| chrUn | 3474319 | 3474874 | 556 SAT1_CF  | blue | na |
| chrUn | 3474886 | 3476370 | 1485 SAT1_CF | blue | na |
| chrUn | 3476382 | 3477057 | 676 SAT1_CF  | blue | na |
| chrUn | 3477105 | 3477733 | 629 SAT1_CF  | blue | na |
| chrUn | 3477787 | 3478322 | 536 SAT1_CF  | blue | na |
| chrUn | 3478404 | 3478928 | 525 SAT1_CF  | blue | na |
| chrUn | 3478943 | 3479079 | 137 SAT1_CF  | blue | na |
| chrUn | 3479145 | 3480265 | 1121 SAT1_CF | blue | na |
| chrUn | 3480288 | 3480954 | 667 SAT1_CF  | blue | na |
| chrUn | 3480998 | 3481523 | 526 SAT1_CF  | blue | na |
| chrUn | 3481544 | 3482411 | 868 SAT1_CF  | blue | na |
| chrUn | 3482423 | 3483076 | 654 SAT1_CF  | blue | na |
| chrUn | 3483156 | 3483377 | 222 SAT1_CF  | blue | na |
| chrUn | 3483391 | 3483934 | 544 SAT1_CF  | blue | na |
| chrUn | 3483945 | 3484263 | 319 SAT1_CF  | blue | na |
| chrUn | 3484316 | 3484818 | 503 SAT1_CF  | blue | na |
| chrUn | 3484831 | 3485512 | 682 SAT1_CF  | blue | na |
| chrUn | 3485526 | 3486200 | 675 SAT1_CF  | blue | na |
| chrUn | 3486280 | 3486787 | 508 SAT1_CF  | blue | na |
| chrUn | 3486868 | 3486976 | 109 SAT1_CF  | blue | na |
| chrUn | 3487021 | 3488240 | 1220 SAT1_CF | blue | na |
| chrUn | 3488273 | 3488778 | 506 SAT1_CF  | blue | na |
| chrUn | 3488810 | 3489513 | 704 SAT1_CF  | blue | na |
| chrUn | 3489526 | 3491593 | 2068 SAT1_CF | blue | na |
| chrUn | 3491606 | 3491714 | 109 SAT1_CF  | blue | na |
| chrUn | 3491735 | 3492289 | 555 SAT1_CF  | blue | na |
| chrUn | 3492301 | 3492978 | 678 SAT1_CF  | blue | na |
| chrUn | 3493075 | 3493616 | 542 SAT1_CF  | blue | na |
| chrUn | 3493641 | 3493966 | 326 SAT1_CF  | blue | na |
| chrUn | 3493992 | 3494518 | 527 SAT1_CF  | blue | na |
| chrUn | 3494566 | 3495369 | 804 SAT1_CF  | blue | na |
| chrUn | 3495401 | 3496457 | 1057 SAT1_CF | blue | na |
| chrUn | 3496534 | 3497079 | 546 SAT1_CF  | blue | na |
| chrUn | 3497092 | 3497198 | 107 SAT1_CF  | blue | na |
| chrUn | 3497221 | 3497793 | 573 SAT1_CF  | blue | na |
| chrUn | 3497805 | 3498567 | 763 SAT1_CF  | blue | na |
| chrUn | 3498580 | 3499226 | 647 SAT1_CF  | blue | na |

|       |         |         |              |      |    |
|-------|---------|---------|--------------|------|----|
| chrUn | 3499238 | 3500096 | 859 SAT1_CF  | blue | na |
| chrUn | 3500138 | 3500680 | 543 SAT1_CF  | blue | na |
| chrUn | 3500727 | 3501989 | 1263 SAT1_CF | blue | na |
| chrUn | 3502052 | 3502532 | 481 SAT1_CF  | blue | na |
| chrUn | 3502580 | 3503730 | 1151 SAT1_CF | blue | na |
| chrUn | 3503773 | 3504858 | 1086 SAT1_CF | blue | na |
| chrUn | 3504871 | 3505272 | 402 SAT1_CF  | blue | na |
| chrUn | 3505310 | 3505812 | 503 SAT1_CF  | blue | na |
| chrUn | 3505825 | 3506506 | 682 SAT1_CF  | blue | na |
| chrUn | 3506518 | 3509213 | 2696 SAT1_CF | blue | na |
| chrUn | 3509257 | 3509800 | 544 SAT1_CF  | blue | na |
| chrUn | 3509813 | 3510188 | 376 SAT1_CF  | blue | na |
| chrUn | 3510254 | 3510756 | 503 SAT1_CF  | blue | na |
| chrUn | 3510769 | 3511452 | 684 SAT1_CF  | blue | na |
| chrUn | 3511464 | 3512324 | 861 SAT1_CF  | blue | na |
| chrUn | 3512366 | 3514031 | 1666 SAT1_CF | blue | na |
| chrUn | 3514059 | 3514194 | 136 SAT1_CF  | blue | na |
| chrUn | 3514260 | 3514762 | 503 SAT1_CF  | blue | na |
| chrUn | 3514774 | 3514880 | 107 SAT1_CF  | blue | na |
| chrUn | 3514904 | 3515532 | 629 SAT1_CF  | blue | na |
| chrUn | 3515556 | 3516414 | 859 SAT1_CF  | blue | na |
| chrUn | 3516428 | 3517118 | 691 SAT1_CF  | blue | na |
| chrUn | 3517130 | 3519153 | 2024 SAT1_CF | blue | na |
| chrUn | 3519184 | 3519708 | 525 SAT1_CF  | blue | na |
| chrUn | 3519723 | 3519963 | 241 SAT1_CF  | blue | na |
| chrUn | 3519981 | 3520473 | 493 SAT1_CF  | blue | na |
| chrUn | 3520530 | 3521701 | 1172 SAT1_CF | blue | na |
| chrUn | 3521818 | 3522325 | 508 SAT1_CF  | blue | na |
| chrUn | 3522338 | 3522839 | 502 SAT1_CF  | blue | na |
| chrUn | 3522852 | 3523532 | 681 SAT1_CF  | blue | na |
| chrUn | 3523544 | 3526238 | 2695 SAT1_CF | blue | na |
| chrUn | 3526282 | 3526826 | 545 SAT1_CF  | blue | na |
| chrUn | 3526839 | 3527194 | 356 SAT1_CF  | blue | na |
| chrUn | 3527281 | 3527783 | 503 SAT1_CF  | blue | na |
| chrUn | 3527796 | 3528467 | 672 SAT1_CF  | blue | na |
| chrUn | 3528514 | 3529185 | 672 SAT1_CF  | blue | na |
| chrUn | 3529216 | 3530073 | 858 SAT1_CF  | blue | na |
| chrUn | 3530085 | 3530942 | 858 SAT1_CF  | blue | na |
| chrUn | 3530995 | 3531528 | 534 SAT1_CF  | blue | na |
| chrUn | 3531562 | 3533430 | 1869 SAT1_CF | blue | na |
| chrUn | 3533487 | 3534034 | 548 SAT1_CF  | blue | na |
| chrUn | 3534076 | 3534620 | 545 SAT1_CF  | blue | na |

|       |         |         |              |      |    |
|-------|---------|---------|--------------|------|----|
| chrUn | 3534662 | 3534943 | 282 SAT1_CF  | blue | na |
| chrUn | 3534960 | 3536435 | 1476 SAT1_CF | blue | na |
| chrUn | 3536462 | 3538271 | 1810 SAT1_CF | blue | na |
| chrUn | 3538284 | 3539044 | 761 SAT1_CF  | blue | na |
| chrUn | 3539068 | 3539739 | 672 SAT1_CF  | blue | na |
| chrUn | 3539751 | 3540678 | 928 SAT1_CF  | blue | na |
| chrUn | 3540691 | 3541851 | 1161 SAT1_CF | blue | na |
| chrUn | 3541893 | 3543570 | 1678 SAT1_CF | blue | na |
| chrUn | 3543585 | 3543742 | 158 SAT1_CF  | blue | na |
| chrUn | 3543787 | 3544869 | 1083 SAT1_CF | blue | na |
| chrUn | 3544880 | 3546618 | 1739 SAT1_CF | blue | na |
| chrUn | 3546662 | 3547187 | 526 SAT1_CF  | blue | na |
| chrUn | 3547231 | 3547774 | 544 SAT1_CF  | blue | na |
| chrUn | 3547801 | 3547936 | 136 SAT1_CF  | blue | na |
| chrUn | 3547964 | 3549171 | 1208 SAT1_CF | blue | na |
| chrUn | 3549185 | 3549887 | 703 SAT1_CF  | blue | na |
| chrUn | 3549900 | 3550580 | 681 SAT1_CF  | blue | na |
| chrUn | 3550592 | 3551351 | 760 SAT1_CF  | blue | na |
| chrUn | 3551365 | 3552038 | 674 SAT1_CF  | blue | na |
| chrUn | 3552081 | 3553080 | 1000 SAT1_CF | blue | na |
| chrUn | 3553124 | 3553750 | 627 SAT1_CF  | blue | na |
| chrUn | 3553812 | 3555181 | 1370 SAT1_CF | blue | na |
| chrUn | 3555192 | 3556124 | 933 SAT1_CF  | blue | na |
| chrUn | 3556164 | 3556665 | 502 SAT1_CF  | blue | na |
| chrUn | 3556678 | 3557438 | 761 SAT1_CF  | blue | na |
| chrUn | 3557459 | 3557524 | 66 SAT1_CF   | blue | na |
| chrUn | 3557545 | 3558064 | 520 SAT1_CF  | blue | na |
| chrUn | 3558076 | 3558933 | 858 SAT1_CF  | blue | na |
| chrUn | 3558975 | 3559519 | 545 SAT1_CF  | blue | na |
| chrUn | 3559557 | 3560671 | 1115 SAT1_CF | blue | na |
| chrUn | 3560853 | 3561034 | 182 SAT1_CF  | blue | na |
| chrUn | 3561055 | 3561573 | 519 SAT1_CF  | blue | na |
| chrUn | 3561586 | 3561691 | 106 SAT1_CF  | blue | na |
| chrUn | 3561714 | 3563415 | 1702 SAT1_CF | blue | na |
| chrUn | 3563427 | 3563555 | 129 SAT1_CF  | blue | na |
| chrUn | 3563613 | 3564171 | 559 SAT1_CF  | blue | na |
| chrUn | 3564183 | 3565899 | 1717 SAT1_CF | blue | na |
| chrUn | 3565925 | 3566561 | 637 SAT1_CF  | blue | na |
| chrUn | 3566574 | 3566929 | 356 SAT1_CF  | blue | na |
| chrUn | 3567046 | 3567564 | 519 SAT1_CF  | blue | na |
| chrUn | 3567595 | 3568668 | 1074 SAT1_CF | blue | na |
| chrUn | 3568682 | 3569609 | 928 SAT1_CF  | blue | na |



|       |         |         |              |      |    |
|-------|---------|---------|--------------|------|----|
| chrUn | 3569658 | 3570159 | 502 SAT1_CF  | blue | na |
| chrUn | 3570173 | 3570931 | 759 SAT1_CF  | blue | na |
| chrUn | 3570943 | 3571052 | 110 SAT1_CF  | blue | na |
| chrUn | 3571073 | 3571617 | 545 SAT1_CF  | blue | na |
| chrUn | 3571714 | 3572254 | 541 SAT1_CF  | blue | na |
| chrUn | 3572297 | 3573955 | 1659 SAT1_CF | blue | na |
| chrUn | 3573988 | 3574144 | 157 SAT1_CF  | blue | na |
| chrUn | 3574189 | 3574689 | 501 SAT1_CF  | blue | na |
| chrUn | 3574702 | 3575561 | 860 SAT1_CF  | blue | na |
| chrUn | 3575638 | 3576182 | 545 SAT1_CF  | blue | na |
| chrUn | 3576224 | 3576505 | 282 SAT1_CF  | blue | na |
| chrUn | 3576523 | 3577411 | 889 SAT1_CF  | blue | na |
| chrUn | 3577528 | 3578066 | 539 SAT1_CF  | blue | na |
| chrUn | 3578086 | 3578193 | 108 SAT1_CF  | blue | na |
| chrUn | 3578214 | 3578769 | 556 SAT1_CF  | blue | na |
| chrUn | 3578781 | 3579644 | 864 SAT1_CF  | blue | na |
| chrUn | 3579721 | 3580266 | 546 SAT1_CF  | blue | na |
| chrUn | 3580388 | 3580882 | 495 SAT1_CF  | blue | na |
| chrUn | 3580939 | 3581485 | 547 SAT1_CF  | blue | na |
| chrUn | 3581527 | 3582624 | 1098 SAT1_CF | blue | na |
| chrUn | 3582652 | 3582788 | 137 SAT1_CF  | blue | na |
| chrUn | 3582854 | 3583356 | 503 SAT1_CF  | blue | na |
| chrUn | 3583369 | 3584131 | 763 SAT1_CF  | blue | na |
| chrUn | 3584143 | 3584931 | 789 SAT1_CF  | blue | na |
| chrUn | 3584959 | 3585523 | 565 SAT1_CF  | blue | na |
| chrUn | 3585566 | 3586113 | 548 SAT1_CF  | blue | na |
| chrUn | 3586178 | 3586335 | 158 SAT1_CF  | blue | na |
| chrUn | 3586380 | 3589533 | 3154 SAT1_CF | blue | na |
| chrUn | 3589615 | 3590139 | 525 SAT1_CF  | blue | na |
| chrUn | 3590154 | 3590290 | 137 SAT1_CF  | blue | na |
| chrUn | 3590356 | 3590857 | 502 SAT1_CF  | blue | na |
| chrUn | 3590870 | 3591543 | 674 SAT1_CF  | blue | na |
| chrUn | 3591586 | 3592217 | 632 SAT1_CF  | blue | na |
| chrUn | 3592245 | 3592804 | 560 SAT1_CF  | blue | na |
| chrUn | 3592888 | 3593435 | 548 SAT1_CF  | blue | na |
| chrUn | 3593463 | 3593599 | 137 SAT1_CF  | blue | na |
| chrUn | 3593665 | 3594861 | 1197 SAT1_CF | blue | na |
| chrUn | 3594873 | 3596791 | 1919 SAT1_CF | blue | na |
| chrUn | 3596848 | 3597480 | 633 SAT1_CF  | blue | na |
| chrUn | 3597492 | 3598095 | 604 SAT1_CF  | blue | na |
| chrUn | 3598108 | 3598213 | 106 SAT1_CF  | blue | na |
| chrUn | 3598234 | 3598786 | 553 SAT1_CF  | blue | na |

|       |         |         |              |      |    |
|-------|---------|---------|--------------|------|----|
| chrUn | 3598798 | 3599663 | 866 SAT1_CF  | blue | na |
| chrUn | 3599705 | 3601863 | 2159 SAT1_CF | blue | na |
| chrUn | 3601875 | 3602739 | 865 SAT1_CF  | blue | na |
| chrUn | 3602921 | 3603102 | 182 SAT1_CF  | blue | na |
| chrUn | 3603123 | 3603642 | 520 SAT1_CF  | blue | na |
| chrUn | 3603655 | 3603762 | 108 SAT1_CF  | blue | na |
| chrUn | 3603783 | 3605054 | 1272 SAT1_CF | blue | na |
| chrUn | 3605070 | 3605206 | 137 SAT1_CF  | blue | na |
| chrUn | 3605272 | 3605775 | 504 SAT1_CF  | blue | na |
| chrUn | 3605788 | 3605894 | 107 SAT1_CF  | blue | na |
| chrUn | 3605916 | 3606395 | 480 SAT1_CF  | blue | na |
| chrUn | 3606407 | 3608748 | 2342 SAT1_CF | blue | na |
| chrUn | 3608761 | 3609115 | 355 SAT1_CF  | blue | na |
| chrUn | 3609231 | 3609750 | 520 SAT1_CF  | blue | na |
| chrUn | 3609781 | 3610307 | 527 SAT1_CF  | blue | na |
| chrUn | 3610351 | 3611040 | 690 SAT1_CF  | blue | na |
| chrUn | 3611055 | 3611542 | 488 SAT1_CF  | blue | na |
| chrUn | 3611642 | 3612188 | 547 SAT1_CF  | blue | na |
| chrUn | 3612201 | 3612277 | 77 SAT1_CF   | blue | na |
| chrUn | 3612330 | 3614501 | 2172 SAT1_CF | blue | na |
| chrUn | 3614532 | 3615039 | 508 SAT1_CF  | blue | na |
| chrUn | 3615052 | 3615406 | 355 SAT1_CF  | blue | na |
| chrUn | 3615493 | 3615994 | 502 SAT1_CF  | blue | na |
| chrUn | 3616007 | 3616768 | 762 SAT1_CF  | blue | na |
| chrUn | 3616781 | 3616852 | 72 SAT1_CF   | blue | na |
| chrUn | 3616875 | 3617425 | 551 SAT1_CF  | blue | na |
| chrUn | 3617443 | 3618111 | 669 SAT1_CF  | blue | na |
| chrUn | 3618154 | 3621108 | 2955 SAT1_CF | blue | na |
| chrUn | 3621158 | 3623419 | 2262 SAT1_CF | blue | na |
| chrUn | 3623466 | 3624487 | 1022 SAT1_CF | blue | na |
| chrUn | 3624508 | 3625029 | 522 SAT1_CF  | blue | na |
| chrUn | 3625042 | 3625744 | 703 SAT1_CF  | blue | na |
| chrUn | 3625756 | 3626433 | 678 SAT1_CF  | blue | na |
| chrUn | 3626476 | 3627020 | 545 SAT1_CF  | blue | na |
| chrUn | 3627061 | 3628068 | 1008 SAT1_CF | blue | na |
| chrUn | 3628113 | 3628615 | 503 SAT1_CF  | blue | na |
| chrUn | 3628628 | 3628733 | 106 SAT1_CF  | blue | na |
| chrUn | 3628755 | 3628900 | 146 SAT1_CF  | blue | na |
| chrUn | 3628996 | 3629561 | 566 SAT1_CF  | blue | na |
| chrUn | 3629573 | 3630977 | 1405 SAT1_CF | blue | na |
| chrUn | 3630988 | 3631341 | 354 SAT1_CF  | blue | na |
| chrUn | 3631428 | 3631928 | 501 SAT1_CF  | blue | na |

|       |         |         |              |      |    |
|-------|---------|---------|--------------|------|----|
| chrUn | 3631941 | 3633895 | 1955 SAT1_CF | blue | na |
| chrUn | 3633939 | 3634731 | 793 SAT1_CF  | blue | na |
| chrUn | 3634912 | 3635092 | 181 SAT1_CF  | blue | na |
| chrUn | 3635153 | 3635623 | 471 SAT1_CF  | blue | na |
| chrUn | 3635646 | 3636970 | 1325 SAT1_CF | blue | na |
| chrUn | 3636985 | 3637116 | 132 SAT1_CF  | blue | na |
| chrUn | 3637168 | 3639088 | 1921 SAT1_CF | blue | na |
| chrUn | 3639116 | 3639680 | 565 SAT1_CF  | blue | na |
| chrUn | 3639723 | 3640272 | 550 SAT1_CF  | blue | na |
| chrUn | 3640315 | 3641093 | 779 SAT1_CF  | blue | na |
| chrUn | 3641171 | 3641679 | 509 SAT1_CF  | blue | na |
| chrUn | 3641693 | 3642343 | 651 SAT1_CF  | blue | na |
| chrUn | 3642365 | 3643116 | 752 SAT1_CF  | blue | na |
| chrUn | 3643129 | 3643745 | 617 SAT1_CF  | blue | na |
| chrUn | 3643958 | 3644113 | 156 SAT1_CF  | blue | na |
| chrUn | 3644178 | 3644776 | 599 SAT1_CF  | blue | na |
| chrUn | 3644799 | 3646000 | 1202 SAT1_CF | blue | na |
| chrUn | 3646045 | 3647421 | 1377 SAT1_CF | blue | na |
| chrUn | 3647461 | 3647955 | 495 SAT1_CF  | blue | na |
| chrUn | 3647989 | 3649362 | 1374 SAT1_CF | blue | na |
| chrUn | 3649374 | 3650232 | 859 SAT1_CF  | blue | na |
| chrUn | 3650275 | 3651056 | 782 SAT1_CF  | blue | na |
| chrUn | 3651135 | 3652083 | 949 SAT1_CF  | blue | na |
| chrUn | 3652136 | 3652635 | 500 SAT1_CF  | blue | na |
| chrUn | 3652654 | 3652757 | 104 SAT1_CF  | blue | na |
| chrUn | 3652778 | 3653321 | 544 SAT1_CF  | blue | na |
| chrUn | 3653364 | 3653907 | 544 SAT1_CF  | blue | na |
| chrUn | 3653935 | 3654092 | 158 SAT1_CF  | blue | na |
| chrUn | 3654137 | 3654631 | 495 SAT1_CF  | blue | na |
| chrUn | 3654660 | 3655207 | 548 SAT1_CF  | blue | na |
| chrUn | 3655250 | 3655798 | 549 SAT1_CF  | blue | na |
| chrUn | 3655875 | 3657506 | 1632 SAT1_CF | blue | na |
| chrUn | 3657534 | 3657670 | 137 SAT1_CF  | blue | na |
| chrUn | 3657736 | 3659732 | 1997 SAT1_CF | blue | na |
| chrUn | 3659759 | 3660283 | 525 SAT1_CF  | blue | na |
| chrUn | 3660328 | 3661605 | 1278 SAT1_CF | blue | na |
| chrUn | 3661686 | 3661911 | 226 SAT1_CF  | blue | na |
| chrUn | 3661922 | 3662700 | 779 SAT1_CF  | blue | na |
| chrUn | 3662731 | 3663259 | 529 SAT1_CF  | blue | na |
| chrUn | 3663272 | 3663378 | 107 SAT1_CF  | blue | na |
| chrUn | 3663401 | 3664053 | 653 SAT1_CF  | blue | na |
| chrUn | 3664066 | 3664141 | 76 SAT1_CF   | blue | na |

|       |         |         |              |      |    |
|-------|---------|---------|--------------|------|----|
| chrUn | 3664160 | 3664712 | 553 SAT1_CF  | blue | na |
| chrUn | 3664724 | 3666054 | 1331 SAT1_CF | blue | na |
| chrUn | 3666098 | 3667480 | 1383 SAT1_CF | blue | na |
| chrUn | 3667520 | 3668020 | 501 SAT1_CF  | blue | na |
| chrUn | 3668163 | 3668717 | 555 SAT1_CF  | blue | na |
| chrUn | 3668729 | 3669403 | 675 SAT1_CF  | blue | na |
| chrUn | 3669450 | 3670537 | 1088 SAT1_CF | blue | na |
| chrUn | 3670617 | 3672052 | 1436 SAT1_CF | blue | na |
| chrUn | 3672094 | 3672259 | 166 SAT1_CF  | blue | na |
| chrUn | 3672442 | 3672627 | 186 SAT1_CF  | blue | na |
| chrUn | 3672644 | 3673157 | 514 SAT1_CF  | blue | na |
| chrUn | 3673177 | 3673285 | 109 SAT1_CF  | blue | na |
| chrUn | 3673305 | 3673864 | 560 SAT1_CF  | blue | na |
| chrUn | 3673876 | 3674551 | 676 SAT1_CF  | blue | na |
| chrUn | 3674594 | 3675744 | 1151 SAT1_CF | blue | na |
| chrUn | 3675770 | 3676289 | 520 SAT1_CF  | blue | na |
| chrUn | 3676302 | 3676984 | 683 SAT1_CF  | blue | na |
| chrUn | 3676996 | 3677945 | 950 SAT1_CF  | blue | na |
| chrUn | 3677959 | 3680305 | 2347 SAT1_CF | blue | na |
| chrUn | 3680386 | 3680551 | 166 SAT1_CF  | blue | na |
| chrUn | 3680732 | 3680917 | 186 SAT1_CF  | blue | na |
| chrUn | 3680953 | 3681453 | 501 SAT1_CF  | blue | na |
| chrUn | 3681471 | 3681580 | 110 SAT1_CF  | blue | na |
| chrUn | 3681593 | 3682208 | 616 SAT1_CF  | blue | na |
| chrUn | 3682225 | 3683088 | 864 SAT1_CF  | blue | na |
| chrUn | 3683122 | 3683641 | 520 SAT1_CF  | blue | na |
| chrUn | 3683654 | 3683761 | 108 SAT1_CF  | blue | na |
| chrUn | 3683783 | 3685467 | 1685 SAT1_CF | blue | na |
| chrUn | 3685490 | 3685840 | 351 SAT1_CF  | blue | na |
| chrUn | 3686029 | 3686243 | 215 SAT1_CF  | blue | na |
| chrUn | 3686255 | 3687964 | 1710 SAT1_CF | blue | na |
| chrUn | 3687992 | 3688149 | 158 SAT1_CF  | blue | na |
| chrUn | 3688194 | 3688696 | 503 SAT1_CF  | blue | na |
| chrUn | 3688709 | 3689389 | 681 SAT1_CF  | blue | na |
| chrUn | 3689401 | 3691010 | 1610 SAT1_CF | blue | na |
| chrUn | 3691220 | 3691377 | 158 SAT1_CF  | blue | na |
| chrUn | 3691442 | 3692036 | 595 SAT1_CF  | blue | na |
| chrUn | 3692057 | 3693114 | 1058 SAT1_CF | blue | na |
| chrUn | 3693127 | 3693627 | 501 SAT1_CF  | blue | na |
| chrUn | 3693645 | 3694585 | 941 SAT1_CF  | blue | na |
| chrUn | 3694606 | 3695125 | 520 SAT1_CF  | blue | na |
| chrUn | 3695136 | 3695538 | 403 SAT1_CF  | blue | na |

|       |         |         |              |      |    |
|-------|---------|---------|--------------|------|----|
| chrUn | 3695598 | 3696667 | 1070 SAT1_CF | blue | na |
| chrUn | 3696685 | 3699411 | 2727 SAT1_CF | blue | na |
| chrUn | 3699453 | 3700547 | 1095 SAT1_CF | blue | na |
| chrUn | 3700559 | 3700668 | 110 SAT1_CF  | blue | na |
| chrUn | 3700689 | 3701162 | 474 SAT1_CF  | blue | na |
| chrUn | 3701189 | 3701776 | 588 SAT1_CF  | blue | na |
| chrUn | 3701803 | 3702477 | 675 SAT1_CF  | blue | na |
| chrUn | 3702522 | 3703921 | 1400 SAT1_CF | blue | na |
| chrUn | 3703974 | 3704664 | 691 SAT1_CF  | blue | na |
| chrUn | 3704679 | 3705249 | 571 SAT1_CF  | blue | na |
| chrUn | 3705279 | 3705871 | 593 SAT1_CF  | blue | na |
| chrUn | 3705899 | 3707504 | 1606 SAT1_CF | blue | na |
| chrUn | 3707519 | 3707676 | 158 SAT1_CF  | blue | na |
| chrUn | 3707721 | 3708221 | 501 SAT1_CF  | blue | na |
| chrUn | 3708235 | 3708918 | 684 SAT1_CF  | blue | na |
| chrUn | 3708930 | 3709039 | 110 SAT1_CF  | blue | na |
| chrUn | 3709060 | 3710743 | 1684 SAT1_CF | blue | na |
| chrUn | 3710813 | 3711314 | 502 SAT1_CF  | blue | na |
| chrUn | 3711327 | 3712006 | 680 SAT1_CF  | blue | na |
| chrUn | 3712030 | 3713462 | 1433 SAT1_CF | blue | na |
| chrUn | 3713527 | 3714083 | 557 SAT1_CF  | blue | na |
| chrUn | 3714125 | 3714650 | 526 SAT1_CF  | blue | na |
| chrUn | 3714665 | 3714822 | 158 SAT1_CF  | blue | na |
| chrUn | 3714867 | 3715364 | 498 SAT1_CF  | blue | na |
| chrUn | 3715377 | 3716748 | 1372 SAT1_CF | blue | na |
| chrUn | 3716791 | 3718482 | 1692 SAT1_CF | blue | na |
| chrUn | 3718493 | 3719095 | 603 SAT1_CF  | blue | na |
| chrUn | 3719107 | 3720444 | 1338 SAT1_CF | blue | na |
| chrUn | 3720466 | 3721148 | 683 SAT1_CF  | blue | na |
| chrUn | 3721160 | 3722010 | 851 SAT1_CF  | blue | na |
| chrUn | 3722023 | 3722948 | 926 SAT1_CF  | blue | na |
| chrUn | 3722980 | 3723504 | 525 SAT1_CF  | blue | na |
| chrUn | 3723547 | 3724504 | 958 SAT1_CF  | blue | na |
| chrUn | 3724561 | 3726017 | 1457 SAT1_CF | blue | na |
| chrUn | 3726031 | 3726969 | 939 SAT1_CF  | blue | na |
| chrUn | 3727009 | 3727503 | 495 SAT1_CF  | blue | na |
| chrUn | 3727527 | 3728962 | 1436 SAT1_CF | blue | na |
| chrUn | 3728974 | 3729147 | 174 SAT1_CF  | blue | na |
| chrUn | 3729190 | 3729972 | 783 SAT1_CF  | blue | na |
| chrUn | 3730052 | 3730599 | 548 SAT1_CF  | blue | na |
| chrUn | 3730610 | 3731008 | 399 SAT1_CF  | blue | na |
| chrUn | 3731048 | 3731549 | 502 SAT1_CF  | blue | na |

|       |         |         |              |      |    |
|-------|---------|---------|--------------|------|----|
| chrUn | 3731567 | 3732235 | 669 SAT1_CF  | blue | na |
| chrUn | 3732278 | 3733241 | 964 SAT1_CF  | blue | na |
| chrUn | 3733285 | 3733832 | 548 SAT1_CF  | blue | na |
| chrUn | 3733851 | 3733942 | 92 SAT1_CF   | blue | na |
| chrUn | 3733985 | 3734346 | 362 SAT1_CF  | blue | na |
| chrUn | 3734392 | 3734891 | 500 SAT1_CF  | blue | na |
| chrUn | 3734905 | 3735588 | 684 SAT1_CF  | blue | na |
| chrUn | 3735600 | 3736452 | 853 SAT1_CF  | blue | na |
| chrUn | 3736490 | 3737037 | 548 SAT1_CF  | blue | na |
| chrUn | 3737052 | 3737411 | 360 SAT1_CF  | blue | na |
| chrUn | 3737471 | 3737952 | 482 SAT1_CF  | blue | na |
| chrUn | 3737965 | 3738649 | 685 SAT1_CF  | blue | na |
| chrUn | 3738662 | 3739841 | 1180 SAT1_CF | blue | na |
| chrUn | 3739884 | 3741819 | 1936 SAT1_CF | blue | na |
| chrUn | 3741831 | 3742591 | 761 SAT1_CF  | blue | na |
| chrUn | 3742603 | 3743462 | 860 SAT1_CF  | blue | na |
| chrUn | 3743504 | 3744047 | 544 SAT1_CF  | blue | na |
| chrUn | 3744089 | 3744291 | 203 SAT1_CF  | blue | na |
| chrUn | 3744472 | 3744657 | 186 SAT1_CF  | blue | na |
| chrUn | 3744713 | 3745193 | 481 SAT1_CF  | blue | na |
| chrUn | 3745206 | 3745311 | 106 SAT1_CF  | blue | na |
| chrUn | 3745334 | 3746554 | 1221 SAT1_CF | blue | na |
| chrUn | 3746568 | 3746670 | 103 SAT1_CF  | blue | na |
| chrUn | 3746695 | 3747639 | 945 SAT1_CF  | blue | na |
| chrUn | 3747651 | 3748334 | 684 SAT1_CF  | blue | na |
| chrUn | 3748346 | 3749353 | 1008 SAT1_CF | blue | na |
| chrUn | 3749381 | 3749933 | 553 SAT1_CF  | blue | na |
| chrUn | 3749945 | 3750760 | 816 SAT1_CF  | blue | na |
| chrUn | 3750790 | 3751316 | 527 SAT1_CF  | blue | na |
| chrUn | 3751379 | 3751486 | 108 SAT1_CF  | blue | na |
| chrUn | 3751531 | 3752032 | 502 SAT1_CF  | blue | na |
| chrUn | 3752045 | 3753377 | 1333 SAT1_CF | blue | na |
| chrUn | 3753426 | 3753761 | 336 SAT1_CF  | blue | na |
| chrUn | 3753793 | 3754280 | 488 SAT1_CF  | blue | na |
| chrUn | 3754291 | 3757519 | 3229 SAT1_CF | blue | na |
| chrUn | 3757547 | 3758585 | 1039 SAT1_CF | blue | na |
| chrUn | 3758597 | 3758914 | 318 SAT1_CF  | blue | na |
| chrUn | 3758927 | 3759428 | 502 SAT1_CF  | blue | na |
| chrUn | 3759446 | 3760120 | 675 SAT1_CF  | blue | na |
| chrUn | 3760165 | 3760855 | 691 SAT1_CF  | blue | na |
| chrUn | 3760880 | 3761973 | 1094 SAT1_CF | blue | na |
| chrUn | 3761985 | 3762874 | 890 SAT1_CF  | blue | na |

|       |         |         |              |      |    |
|-------|---------|---------|--------------|------|----|
| chrUn | 3762888 | 3764256 | 1369 SAT1_CF | blue | na |
| chrUn | 3764302 | 3764824 | 523 SAT1_CF  | blue | na |
| chrUn | 3764837 | 3766792 | 1956 SAT1_CF | blue | na |
| chrUn | 3766836 | 3767383 | 548 SAT1_CF  | blue | na |
| chrUn | 3767426 | 3767628 | 203 SAT1_CF  | blue | na |
| chrUn | 3767809 | 3767989 | 181 SAT1_CF  | blue | na |
| chrUn | 3768050 | 3768520 | 471 SAT1_CF  | blue | na |
| chrUn | 3768543 | 3769867 | 1325 SAT1_CF | blue | na |
| chrUn | 3769882 | 3770039 | 158 SAT1_CF  | blue | na |
| chrUn | 3770065 | 3771456 | 1392 SAT1_CF | blue | na |
| chrUn | 3771534 | 3772530 | 997 SAT1_CF  | blue | na |
| chrUn | 3772542 | 3773215 | 674 SAT1_CF  | blue | na |
| chrUn | 3773426 | 3773583 | 158 SAT1_CF  | blue | na |
| chrUn | 3773648 | 3774121 | 474 SAT1_CF  | blue | na |
| chrUn | 3774134 | 3774242 | 109 SAT1_CF  | blue | na |
| chrUn | 3774263 | 3774895 | 633 SAT1_CF  | blue | na |
| chrUn | 3774933 | 3775247 | 315 SAT1_CF  | blue | na |
| chrUn | 3775334 | 3775835 | 502 SAT1_CF  | blue | na |
| chrUn | 3775853 | 3776793 | 941 SAT1_CF  | blue | na |
| chrUn | 3776814 | 3777332 | 519 SAT1_CF  | blue | na |
| chrUn | 3777343 | 3777698 | 356 SAT1_CF  | blue | na |
| chrUn | 3777785 | 3778873 | 1089 SAT1_CF | blue | na |
| chrUn | 3778891 | 3780216 | 1326 SAT1_CF | blue | na |
| chrUn | 3780259 | 3781185 | 927 SAT1_CF  | blue | na |
| chrUn | 3781247 | 3781488 | 242 SAT1_CF  | blue | na |
| chrUn | 3781519 | 3782067 | 549 SAT1_CF  | blue | na |
| chrUn | 3782088 | 3782656 | 569 SAT1_CF  | blue | na |
| chrUn | 3782721 | 3783291 | 571 SAT1_CF  | blue | na |
| chrUn | 3783310 | 3784798 | 1489 SAT1_CF | blue | na |
| chrUn | 3784877 | 3785791 | 915 SAT1_CF  | blue | na |
| chrUn | 3785878 | 3786378 | 501 SAT1_CF  | blue | na |
| chrUn | 3786391 | 3788564 | 2174 SAT1_CF | blue | na |
| chrUn | 3788612 | 3789118 | 507 SAT1_CF  | blue | na |
| chrUn | 3789151 | 3789920 | 770 SAT1_CF  | blue | na |
| chrUn | 3789932 | 3792687 | 2756 SAT1_CF | blue | na |
| chrUn | 3792727 | 3793227 | 501 SAT1_CF  | blue | na |
| chrUn | 3793272 | 3793924 | 653 SAT1_CF  | blue | na |
| chrUn | 3793936 | 3794610 | 675 SAT1_CF  | blue | na |
| chrUn | 3794654 | 3795741 | 1088 SAT1_CF | blue | na |
| chrUn | 3795825 | 3797261 | 1437 SAT1_CF | blue | na |
| chrUn | 3797303 | 3797468 | 166 SAT1_CF  | blue | na |
| chrUn | 3797647 | 3797832 | 186 SAT1_CF  | blue | na |

|       |         |         |              |      |    |
|-------|---------|---------|--------------|------|----|
| chrUn | 3797849 | 3798368 | 520 SAT1_CF  | blue | na |
| chrUn | 3798381 | 3798489 | 109 SAT1_CF  | blue | na |
| chrUn | 3798509 | 3799068 | 560 SAT1_CF  | blue | na |
| chrUn | 3799080 | 3800824 | 1745 SAT1_CF | blue | na |
| chrUn | 3800872 | 3801384 | 513 SAT1_CF  | blue | na |
| chrUn | 3801462 | 3802007 | 546 SAT1_CF  | blue | na |
| chrUn | 3802020 | 3802127 | 108 SAT1_CF  | blue | na |
| chrUn | 3802150 | 3802722 | 573 SAT1_CF  | blue | na |
| chrUn | 3802734 | 3803410 | 677 SAT1_CF  | blue | na |
| chrUn | 3803423 | 3804920 | 1498 SAT1_CF | blue | na |
| chrUn | 3804960 | 3805454 | 495 SAT1_CF  | blue | na |
| chrUn | 3805474 | 3806156 | 683 SAT1_CF  | blue | na |
| chrUn | 3806169 | 3807394 | 1226 SAT1_CF | blue | na |
| chrUn | 3807408 | 3807480 | 73 SAT1_CF   | blue | na |
| chrUn | 3807537 | 3808286 | 750 SAT1_CF  | blue | na |
| chrUn | 3808315 | 3808861 | 547 SAT1_CF  | blue | na |
| chrUn | 3808873 | 3809547 | 675 SAT1_CF  | blue | na |
| chrUn | 3809596 | 3809712 | 117 SAT1_CF  | blue | na |
| chrUn | 3809754 | 3810297 | 544 SAT1_CF  | blue | na |
| chrUn | 3810343 | 3811197 | 855 SAT1_CF  | blue | na |
| chrUn | 3811280 | 3811905 | 626 SAT1_CF  | blue | na |
| chrUn | 3811959 | 3812493 | 535 SAT1_CF  | blue | na |
| chrUn | 3812575 | 3813085 | 511 SAT1_CF  | blue | na |
| chrUn | 3813113 | 3813249 | 137 SAT1_CF  | blue | na |
| chrUn | 3813315 | 3814503 | 1189 SAT1_CF | blue | na |
| chrUn | 3814546 | 3815178 | 633 SAT1_CF  | blue | na |
| chrUn | 3815205 | 3815767 | 563 SAT1_CF  | blue | na |
| chrUn | 3815847 | 3816161 | 315 SAT1_CF  | blue | na |
| chrUn | 3816180 | 3816722 | 543 SAT1_CF  | blue | na |
| chrUn | 3816793 | 3817861 | 1069 SAT1_CF | blue | na |
| chrUn | 3818042 | 3818215 | 174 SAT1_CF  | blue | na |
| chrUn | 3818283 | 3818843 | 561 SAT1_CF  | blue | na |
| chrUn | 3818905 | 3820601 | 1697 SAT1_CF | blue | na |
| chrUn | 3820614 | 3821372 | 759 SAT1_CF  | blue | na |
| chrUn | 3821385 | 3822092 | 708 SAT1_CF  | blue | na |
| chrUn | 3822134 | 3823991 | 1858 SAT1_CF | blue | na |
| chrUn | 3824031 | 3824525 | 495 SAT1_CF  | blue | na |
| chrUn | 3824545 | 3824653 | 109 SAT1_CF  | blue | na |
| chrUn | 3824674 | 3825228 | 555 SAT1_CF  | blue | na |
| chrUn | 3825240 | 3825915 | 676 SAT1_CF  | blue | na |
| chrUn | 3825958 | 3826913 | 956 SAT1_CF  | blue | na |
| chrUn | 3826991 | 3827538 | 548 SAT1_CF  | blue | na |



|       |         |         |              |      |    |
|-------|---------|---------|--------------|------|----|
| chrUn | 3827576 | 3827903 | 328 SAT1_CF  | blue | na |
| chrUn | 3827990 | 3828491 | 502 SAT1_CF  | blue | na |
| chrUn | 3828505 | 3829265 | 761 SAT1_CF  | blue | na |
| chrUn | 3829277 | 3829995 | 719 SAT1_CF  | blue | na |
| chrUn | 3830023 | 3831085 | 1063 SAT1_CF | blue | na |
| chrUn | 3831128 | 3831960 | 833 SAT1_CF  | blue | na |
| chrUn | 3832190 | 3832738 | 549 SAT1_CF  | blue | na |
| chrUn | 3832760 | 3832849 | 90 SAT1_CF   | blue | na |
| chrUn | 3832873 | 3833880 | 1008 SAT1_CF | blue | na |
| chrUn | 3833893 | 3834653 | 761 SAT1_CF  | blue | na |
| chrUn | 3834671 | 3836322 | 1652 SAT1_CF | blue | na |
| chrUn | 3836334 | 3837700 | 1367 SAT1_CF | blue | na |
| chrUn | 3837765 | 3838327 | 563 SAT1_CF  | blue | na |
| chrUn | 3838370 | 3838921 | 552 SAT1_CF  | blue | na |
| chrUn | 3838932 | 3839543 | 612 SAT1_CF  | blue | na |
| chrUn | 3839566 | 3840232 | 667 SAT1_CF  | blue | na |
| chrUn | 3840275 | 3840801 | 527 SAT1_CF  | blue | na |
| chrUn | 3840823 | 3842315 | 1493 SAT1_CF | blue | na |
| chrUn | 3842355 | 3842856 | 502 SAT1_CF  | blue | na |
| chrUn | 3842869 | 3843064 | 196 SAT1_CF  | blue | na |
| chrUn | 3843080 | 3843624 | 545 SAT1_CF  | blue | na |
| chrUn | 3843666 | 3844210 | 545 SAT1_CF  | blue | na |
| chrUn | 3844226 | 3845825 | 1600 SAT1_CF | blue | na |
| chrUn | 3845837 | 3846490 | 654 SAT1_CF  | blue | na |
| chrUn | 3846570 | 3846796 | 227 SAT1_CF  | blue | na |
| chrUn | 3846807 | 3848198 | 1392 SAT1_CF | blue | na |
| chrUn | 3848277 | 3848801 | 525 SAT1_CF  | blue | na |
| chrUn | 3848865 | 3849410 | 546 SAT1_CF  | blue | na |
| chrUn | 3849423 | 3849529 | 107 SAT1_CF  | blue | na |
| chrUn | 3849552 | 3850126 | 575 SAT1_CF  | blue | na |
| chrUn | 3850138 | 3850822 | 685 SAT1_CF  | blue | na |
| chrUn | 3850835 | 3851481 | 647 SAT1_CF  | blue | na |
| chrUn | 3851493 | 3851601 | 109 SAT1_CF  | blue | na |
| chrUn | 3851624 | 3852350 | 727 SAT1_CF  | blue | na |
| chrUn | 3852392 | 3852933 | 542 SAT1_CF  | blue | na |
| chrUn | 3852980 | 3854078 | 1099 SAT1_CF | blue | na |
| chrUn | 3854266 | 3854463 | 198 SAT1_CF  | blue | na |
| chrUn | 3854523 | 3855003 | 481 SAT1_CF  | blue | na |
| chrUn | 3855017 | 3857517 | 2501 SAT1_CF | blue | na |
| chrUn | 3857597 | 3859032 | 1436 SAT1_CF | blue | na |
| chrUn | 3859046 | 3859405 | 360 SAT1_CF  | blue | na |
| chrUn | 3859426 | 3859946 | 521 SAT1_CF  | blue | na |

|       |         |         |              |      |    |
|-------|---------|---------|--------------|------|----|
| chrUn | 3859960 | 3861358 | 1399 SAT1_CF | blue | na |
| chrUn | 3861375 | 3861990 | 616 SAT1_CF  | blue | na |
| chrUn | 3862002 | 3862678 | 677 SAT1_CF  | blue | na |
| chrUn | 3862721 | 3863260 | 540 SAT1_CF  | blue | na |
| chrUn | 3863274 | 3864820 | 1547 SAT1_CF | blue | na |
| chrUn | 3864886 | 3865406 | 521 SAT1_CF  | blue | na |
| chrUn | 3865419 | 3865821 | 403 SAT1_CF  | blue | na |
| chrUn | 3865842 | 3866362 | 521 SAT1_CF  | blue | na |
| chrUn | 3866375 | 3866978 | 604 SAT1_CF  | blue | na |
| chrUn | 3866990 | 3867843 | 854 SAT1_CF  | blue | na |
| chrUn | 3867856 | 3868366 | 511 SAT1_CF  | blue | na |
| chrUn | 3868528 | 3869803 | 1276 SAT1_CF | blue | na |
| chrUn | 3869824 | 3870710 | 887 SAT1_CF  | blue | na |
| chrUn | 3870797 | 3871295 | 499 SAT1_CF  | blue | na |
| chrUn | 3871308 | 3871415 | 108 SAT1_CF  | blue | na |
| chrUn | 3871436 | 3872681 | 1246 SAT1_CF | blue | na |
| chrUn | 3872694 | 3873369 | 676 SAT1_CF  | blue | na |
| chrUn | 3873412 | 3873952 | 541 SAT1_CF  | blue | na |
| chrUn | 3873965 | 3875109 | 1145 SAT1_CF | blue | na |
| chrUn | 3875120 | 3875227 | 108 SAT1_CF  | blue | na |
| chrUn | 3875253 | 3875773 | 521 SAT1_CF  | blue | na |
| chrUn | 3875786 | 3876392 | 607 SAT1_CF  | blue | na |
| chrUn | 3876404 | 3877081 | 678 SAT1_CF  | blue | na |
| chrUn | 3877124 | 3877666 | 543 SAT1_CF  | blue | na |
| chrUn | 3877714 | 3877929 | 216 SAT1_CF  | blue | na |
| chrUn | 3877947 | 3878533 | 587 SAT1_CF  | blue | na |
| chrUn | 3879916 | 3880493 | 578 SAT1_CF  | blue | na |
| chrUn | 3880533 | 3881027 | 495 SAT1_CF  | blue | na |
| chrUn | 3881047 | 3881731 | 685 SAT1_CF  | blue | na |
| chrUn | 3881743 | 3882940 | 1198 SAT1_CF | blue | na |
| chrUn | 3882982 | 3883524 | 543 SAT1_CF  | blue | na |
| chrUn | 3883624 | 3885358 | 1735 SAT1_CF | blue | na |
| chrUn | 3885376 | 3887399 | 2024 SAT1_CF | blue | na |
| chrUn | 3887479 | 3887965 | 487 SAT1_CF  | blue | na |
| chrUn | 3888015 | 3888171 | 157 SAT1_CF  | blue | na |
| chrUn | 3888197 | 3889402 | 1206 SAT1_CF | blue | na |
| chrUn | 3889422 | 3890784 | 1363 SAT1_CF | blue | na |
| chrUn | 3890827 | 3891455 | 629 SAT1_CF  | blue | na |
| chrUn | 3891483 | 3892689 | 1207 SAT1_CF | blue | na |
| chrUn | 3892704 | 3893406 | 703 SAT1_CF  | blue | na |
| chrUn | 3893419 | 3895769 | 2351 SAT1_CF | blue | na |
| chrUn | 3895810 | 3896764 | 955 SAT1_CF  | blue | na |

|       |         |         |              |      |    |
|-------|---------|---------|--------------|------|----|
| chrUn | 3896821 | 3897368 | 548 SAT1_CF  | blue | na |
| chrUn | 3897381 | 3899181 | 1801 SAT1_CF | blue | na |
| chrUn | 3899268 | 3899769 | 502 SAT1_CF  | blue | na |
| chrUn | 3899782 | 3900542 | 761 SAT1_CF  | blue | na |
| chrUn | 3900559 | 3902795 | 2237 SAT1_CF | blue | na |
| chrUn | 3902808 | 3903159 | 352 SAT1_CF  | blue | na |
| chrUn | 3903212 | 3903712 | 501 SAT1_CF  | blue | na |
| chrUn | 3903730 | 3904795 | 1066 SAT1_CF | blue | na |
| chrUn | 3904821 | 3905231 | 411 SAT1_CF  | blue | na |
| chrUn | 3905257 | 3905737 | 481 SAT1_CF  | blue | na |
| chrUn | 3905764 | 3906447 | 684 SAT1_CF  | blue | na |
| chrUn | 3906460 | 3907326 | 867 SAT1_CF  | blue | na |
| chrUn | 3907356 | 3907892 | 537 SAT1_CF  | blue | na |
| chrUn | 3907967 | 3908213 | 247 SAT1_CF  | blue | na |
| chrUn | 3908247 | 3909170 | 924 SAT1_CF  | blue | na |
| chrUn | 3909210 | 3909711 | 502 SAT1_CF  | blue | na |
| chrUn | 3909725 | 3910406 | 682 SAT1_CF  | blue | na |
| chrUn | 3910418 | 3911090 | 673 SAT1_CF  | blue | na |
| chrUn | 3911133 | 3911765 | 633 SAT1_CF  | blue | na |
| chrUn | 3911793 | 3912435 | 643 SAT1_CF  | blue | na |
| chrUn | 3912474 | 3912986 | 513 SAT1_CF  | blue | na |
| chrUn | 3913014 | 3913718 | 705 SAT1_CF  | blue | na |
| chrUn | 3913729 | 3915028 | 1300 SAT1_CF | blue | na |
| chrUn | 3915071 | 3916064 | 994 SAT1_CF  | blue | na |
| chrUn | 3916108 | 3917065 | 958 SAT1_CF  | blue | na |
| chrUn | 3917105 | 3917606 | 502 SAT1_CF  | blue | na |
| chrUn | 3917619 | 3918380 | 762 SAT1_CF  | blue | na |
| chrUn | 3918392 | 3919655 | 1264 SAT1_CF | blue | na |
| chrUn | 3919705 | 3920249 | 545 SAT1_CF  | blue | na |
| chrUn | 3920287 | 3920634 | 348 SAT1_CF  | blue | na |
| chrUn | 3920676 | 3921261 | 586 SAT1_CF  | blue | na |
| chrUn | 3921273 | 3922433 | 1161 SAT1_CF | blue | na |
| chrUn | 3922446 | 3923122 | 677 SAT1_CF  | blue | na |
| chrUn | 3923135 | 3924739 | 1605 SAT1_CF | blue | na |
| chrUn | 3924764 | 3925597 | 834 SAT1_CF  | blue | na |
| chrUn | 3925610 | 3925718 | 109 SAT1_CF  | blue | na |
| chrUn | 3925739 | 3926117 | 379 SAT1_CF  | blue | na |
| chrUn | 3926204 | 3926706 | 503 SAT1_CF  | blue | na |
| chrUn | 3926731 | 3927400 | 670 SAT1_CF  | blue | na |
| chrUn | 3927412 | 3928271 | 860 SAT1_CF  | blue | na |
| chrUn | 3928313 | 3929214 | 902 SAT1_CF  | blue | na |
| chrUn | 3929235 | 3929751 | 517 SAT1_CF  | blue | na |

|       |         |         |              |      |    |
|-------|---------|---------|--------------|------|----|
| chrUn | 3929789 | 3930120 | 332 SAT1_CF  | blue | na |
| chrUn | 3930207 | 3930709 | 503 SAT1_CF  | blue | na |
| chrUn | 3930721 | 3930827 | 107 SAT1_CF  | blue | na |
| chrUn | 3930851 | 3931395 | 545 SAT1_CF  | blue | na |
| chrUn | 3931439 | 3931982 | 544 SAT1_CF  | blue | na |
| chrUn | 3932000 | 3932686 | 687 SAT1_CF  | blue | na |
| chrUn | 3932698 | 3933274 | 577 SAT1_CF  | blue | na |
| chrUn | 3933289 | 3933548 | 260 SAT1_CF  | blue | na |
| chrUn | 3933561 | 3933601 | 41 SAT1_CF   | blue | na |
| chrUn | 3933634 | 3934671 | 1038 SAT1_CF | blue | na |
| chrUn | 3934751 | 3935276 | 526 SAT1_CF  | blue | na |
| chrUn | 3935291 | 3935427 | 137 SAT1_CF  | blue | na |
| chrUn | 3935522 | 3936041 | 520 SAT1_CF  | blue | na |
| chrUn | 3936098 | 3936645 | 548 SAT1_CF  | blue | na |
| chrUn | 3936687 | 3937230 | 544 SAT1_CF  | blue | na |
| chrUn | 3937272 | 3937554 | 283 SAT1_CF  | blue | na |
| chrUn | 3937572 | 3938460 | 889 SAT1_CF  | blue | na |
| chrUn | 3938547 | 3939046 | 500 SAT1_CF  | blue | na |
| chrUn | 3939073 | 3939904 | 832 SAT1_CF  | blue | na |
| chrUn | 3939927 | 3940445 | 519 SAT1_CF  | blue | na |
| chrUn | 3940457 | 3941312 | 856 SAT1_CF  | blue | na |
| chrUn | 3941355 | 3942164 | 810 SAT1_CF  | blue | na |
| chrUn | 3942189 | 3942818 | 630 SAT1_CF  | blue | na |
| chrUn | 3942846 | 3943410 | 565 SAT1_CF  | blue | na |
| chrUn | 3943490 | 3944014 | 525 SAT1_CF  | blue | na |
| chrUn | 3944029 | 3944186 | 158 SAT1_CF  | blue | na |
| chrUn | 3944230 | 3944732 | 503 SAT1_CF  | blue | na |
| chrUn | 3944754 | 3946108 | 1355 SAT1_CF | blue | na |
| chrUn | 3946158 | 3946532 | 375 SAT1_CF  | blue | na |
| chrUn | 3946588 | 3947780 | 1193 SAT1_CF | blue | na |
| chrUn | 3947823 | 3948149 | 327 SAT1_CF  | blue | na |
| chrUn | 3948193 | 3949729 | 1537 SAT1_CF | blue | na |
| chrUn | 3949742 | 3949808 | 67 SAT1_CF   | blue | na |
| chrUn | 3949836 | 3950351 | 516 SAT1_CF  | blue | na |
| chrUn | 3950369 | 3951221 | 853 SAT1_CF  | blue | na |
| chrUn | 3951263 | 3952228 | 966 SAT1_CF  | blue | na |
| chrUn | 3952240 | 3953591 | 1352 SAT1_CF | blue | na |
| chrUn | 3953619 | 3956250 | 2632 SAT1_CF | blue | na |
| chrUn | 3956293 | 3957127 | 835 SAT1_CF  | blue | na |
| chrUn | 3957182 | 3957682 | 501 SAT1_CF  | blue | na |
| chrUn | 3957695 | 3957801 | 107 SAT1_CF  | blue | na |
| chrUn | 3957824 | 3959030 | 1207 SAT1_CF | blue | na |

|       |         |         |              |      |    |
|-------|---------|---------|--------------|------|----|
| chrUn | 3959055 | 3959380 | 326 SAT1_CF  | blue | na |
| chrUn | 3959460 | 3959968 | 509 SAT1_CF  | blue | na |
| chrUn | 3959981 | 3960383 | 403 SAT1_CF  | blue | na |
| chrUn | 3960423 | 3960923 | 501 SAT1_CF  | blue | na |
| chrUn | 3960935 | 3961786 | 852 SAT1_CF  | blue | na |
| chrUn | 3961799 | 3962415 | 617 SAT1_CF  | blue | na |
| chrUn | 3962494 | 3963018 | 525 SAT1_CF  | blue | na |
| chrUn | 3963033 | 3963168 | 136 SAT1_CF  | blue | na |
| chrUn | 3963235 | 3963735 | 501 SAT1_CF  | blue | na |
| chrUn | 3963748 | 3964357 | 610 SAT1_CF  | blue | na |
| chrUn | 3964369 | 3965043 | 675 SAT1_CF  | blue | na |
| chrUn | 3965056 | 3965226 | 171 SAT1_CF  | blue | na |
| chrUn | 3965268 | 3967078 | 1811 SAT1_CF | blue | na |
| chrUn | 3967165 | 3967666 | 502 SAT1_CF  | blue | na |
| chrUn | 3967690 | 3967792 | 103 SAT1_CF  | blue | na |
| chrUn | 3967809 | 3968793 | 985 SAT1_CF  | blue | na |
| chrUn | 3968815 | 3970481 | 1667 SAT1_CF | blue | na |
| chrUn | 3970524 | 3971069 | 546 SAT1_CF  | blue | na |
| chrUn | 3971111 | 3972040 | 930 SAT1_CF  | blue | na |
| chrUn | 3972082 | 3972749 | 668 SAT1_CF  | blue | na |
| chrUn | 3972815 | 3973355 | 541 SAT1_CF  | blue | na |
| chrUn | 3973372 | 3974040 | 669 SAT1_CF  | blue | na |
| chrUn | 3974118 | 3975077 | 960 SAT1_CF  | blue | na |
| chrUn | 3975144 | 3976921 | 1778 SAT1_CF | blue | na |
| chrUn | 3977118 | 3977332 | 215 SAT1_CF  | blue | na |
| chrUn | 3977344 | 3978148 | 805 SAT1_CF  | blue | na |
| chrUn | 3978162 | 3978679 | 518 SAT1_CF  | blue | na |
| chrUn | 3978723 | 3979287 | 565 SAT1_CF  | blue | na |
| chrUn | 3979330 | 3980027 | 698 SAT1_CF  | blue | na |
| chrUn | 3980094 | 3980739 | 646 SAT1_CF  | blue | na |
| chrUn | 3982164 | 3982681 | 518 SAT1_CF  | blue | na |
| chrUn | 3982768 | 3983262 | 495 SAT1_CF  | blue | na |
| chrUn | 3983282 | 3983964 | 683 SAT1_CF  | blue | na |
| chrUn | 3983976 | 3984652 | 677 SAT1_CF  | blue | na |
| chrUn | 3984694 | 3985915 | 1222 SAT1_CF | blue | na |
| chrUn | 3985995 | 3986519 | 525 SAT1_CF  | blue | na |
| chrUn | 3986534 | 3986690 | 157 SAT1_CF  | blue | na |
| chrUn | 3986716 | 3987237 | 522 SAT1_CF  | blue | na |
| chrUn | 3987250 | 3987325 | 76 SAT1_CF   | blue | na |
| chrUn | 3987344 | 3987897 | 554 SAT1_CF  | blue | na |
| chrUn | 3987940 | 3988903 | 964 SAT1_CF  | blue | na |
| chrUn | 3988930 | 3990463 | 1534 SAT1_CF | blue | na |

|       |         |         |              |      |    |
|-------|---------|---------|--------------|------|----|
| chrUn | 3990485 | 3990977 | 493 SAT1_CF  | blue | na |
| chrUn | 3991020 | 3991985 | 966 SAT1_CF  | blue | na |
| chrUn | 3992052 | 3992564 | 513 SAT1_CF  | blue | na |
| chrUn | 3992607 | 3992979 | 373 SAT1_CF  | blue | na |
| chrUn | 3993015 | 3993517 | 503 SAT1_CF  | blue | na |
| chrUn | 3993529 | 3993637 | 109 SAT1_CF  | blue | na |
| chrUn | 3993658 | 3994713 | 1056 SAT1_CF | blue | na |
| chrUn | 3994726 | 3994797 | 72 SAT1_CF   | blue | na |
| chrUn | 3994820 | 3995373 | 554 SAT1_CF  | blue | na |
| chrUn | 3995384 | 3995985 | 602 SAT1_CF  | blue | na |
| chrUn | 3995997 | 3996672 | 676 SAT1_CF  | blue | na |
| chrUn | 3996715 | 3997344 | 630 SAT1_CF  | blue | na |
| chrUn | 3997672 | 3998207 | 536 SAT1_CF  | blue | na |
| chrUn | 3998233 | 3998746 | 514 SAT1_CF  | blue | na |
| chrUn | 3998758 | 4000075 | 1318 SAT1_CF | blue | na |
| chrUn | 4000110 | 4000922 | 813 SAT1_CF  | blue | na |
| chrUn | 4000935 | 4001011 | 77 SAT1_CF   | blue | na |
| chrUn | 4001064 | 4004359 | 3296 SAT1_CF | blue | na |
| chrUn | 4004446 | 4005541 | 1096 SAT1_CF | blue | na |
| chrUn | 4005572 | 4006058 | 487 SAT1_CF  | blue | na |
| chrUn | 4006109 | 4006266 | 158 SAT1_CF  | blue | na |
| chrUn | 4006331 | 4008156 | 1826 SAT1_CF | blue | na |
| chrUn | 4008181 | 4010343 | 2163 SAT1_CF | blue | na |
| chrUn | 4010396 | 4010898 | 503 SAT1_CF  | blue | na |
| chrUn | 4010910 | 4011016 | 107 SAT1_CF  | blue | na |
| chrUn | 4011040 | 4011665 | 626 SAT1_CF  | blue | na |
| chrUn | 4011689 | 4012548 | 860 SAT1_CF  | blue | na |
| chrUn | 4012566 | 4013250 | 685 SAT1_CF  | blue | na |
| chrUn | 4013262 | 4014111 | 850 SAT1_CF  | blue | na |
| chrUn | 4014124 | 4016489 | 2366 SAT1_CF | blue | na |
| chrUn | 4016501 | 4017361 | 861 SAT1_CF  | blue | na |
| chrUn | 4017404 | 4018194 | 791 SAT1_CF  | blue | na |
| chrUn | 4018238 | 4018780 | 543 SAT1_CF  | blue | na |
| chrUn | 4018804 | 4019476 | 673 SAT1_CF  | blue | na |
| chrUn | 4019488 | 4020162 | 675 SAT1_CF  | blue | na |
| chrUn | 4020177 | 4020821 | 645 SAT1_CF  | blue | na |
| chrUn | 4020866 | 4021171 | 306 SAT1_CF  | blue | na |
| chrUn | 4021251 | 4022163 | 913 SAT1_CF  | blue | na |
| chrUn | 4022250 | 4022751 | 502 SAT1_CF  | blue | na |
| chrUn | 4022764 | 4023447 | 684 SAT1_CF  | blue | na |
| chrUn | 4023459 | 4024367 | 909 SAT1_CF  | blue | na |
| chrUn | 4024397 | 4026609 | 2213 SAT1_CF | blue | na |

|       |         |         |              |      |    |
|-------|---------|---------|--------------|------|----|
| chrUn | 4026637 | 4026794 | 158 SAT1_CF  | blue | na |
| chrUn | 4026839 | 4027339 | 501 SAT1_CF  | blue | na |
| chrUn | 4027353 | 4028036 | 684 SAT1_CF  | blue | na |
| chrUn | 4028048 | 4028157 | 110 SAT1_CF  | blue | na |
| chrUn | 4028178 | 4029861 | 1684 SAT1_CF | blue | na |
| chrUn | 4029931 | 4030432 | 502 SAT1_CF  | blue | na |
| chrUn | 4030445 | 4031124 | 680 SAT1_CF  | blue | na |
| chrUn | 4031148 | 4032580 | 1433 SAT1_CF | blue | na |
| chrUn | 4032645 | 4033206 | 562 SAT1_CF  | blue | na |
| chrUn | 4033249 | 4033800 | 552 SAT1_CF  | blue | na |
| chrUn | 4033813 | 4034488 | 676 SAT1_CF  | blue | na |
| chrUn | 4034531 | 4035072 | 542 SAT1_CF  | blue | na |
| chrUn | 4035085 | 4036229 | 1145 SAT1_CF | blue | na |
| chrUn | 4036240 | 4036348 | 109 SAT1_CF  | blue | na |
| chrUn | 4036394 | 4036894 | 501 SAT1_CF  | blue | na |
| chrUn | 4036907 | 4037513 | 607 SAT1_CF  | blue | na |
| chrUn | 4037525 | 4038207 | 683 SAT1_CF  | blue | na |
| chrUn | 4038219 | 4039863 | 1645 SAT1_CF | blue | na |
| chrUn | 4039927 | 4040316 | 390 SAT1_CF  | blue | na |
| chrUn | 4040371 | 4040873 | 503 SAT1_CF  | blue | na |
| chrUn | 4040885 | 4040990 | 106 SAT1_CF  | blue | na |
| chrUn | 4041014 | 4041816 | 803 SAT1_CF  | blue | na |
| chrUn | 4041829 | 4041937 | 109 SAT1_CF  | blue | na |
| chrUn | 4041958 | 4042707 | 750 SAT1_CF  | blue | na |
| chrUn | 4042729 | 4045192 | 2464 SAT1_CF | blue | na |
| chrUn | 4045373 | 4045557 | 185 SAT1_CF  | blue | na |
| chrUn | 4045573 | 4046091 | 519 SAT1_CF  | blue | na |
| chrUn | 4046105 | 4046639 | 535 SAT1_CF  | blue | na |
| chrUn | 4046651 | 4047504 | 854 SAT1_CF  | blue | na |
| chrUn | 4047554 | 4048922 | 1369 SAT1_CF | blue | na |
| chrUn | 4048936 | 4049290 | 355 SAT1_CF  | blue | na |
| chrUn | 4049395 | 4049876 | 482 SAT1_CF  | blue | na |
| chrUn | 4049889 | 4049964 | 76 SAT1_CF   | blue | na |
| chrUn | 4049983 | 4051877 | 1895 SAT1_CF | blue | na |
| chrUn | 4051921 | 4052484 | 564 SAT1_CF  | blue | na |
| chrUn | 4052527 | 4052721 | 195 SAT1_CF  | blue | na |
| chrUn | 4052749 | 4053300 | 552 SAT1_CF  | blue | na |
| chrUn | 4053312 | 4054682 | 1371 SAT1_CF | blue | na |
| chrUn | 4054725 | 4055356 | 632 SAT1_CF  | blue | na |
| chrUn | 4055384 | 4055945 | 562 SAT1_CF  | blue | na |
| chrUn | 4056025 | 4056574 | 550 SAT1_CF  | blue | na |
| chrUn | 4056602 | 4056739 | 138 SAT1_CF  | blue | na |

|       |         |         |              |      |    |
|-------|---------|---------|--------------|------|----|
| chrUn | 4056786 | 4057306 | 521 SAT1_CF  | blue | na |
| chrUn | 4057332 | 4058692 | 1361 SAT1_CF | blue | na |
| chrUn | 4058739 | 4058858 | 120 SAT1_CF  | blue | na |
| chrUn | 4058900 | 4059682 | 783 SAT1_CF  | blue | na |
| chrUn | 4059725 | 4060270 | 546 SAT1_CF  | blue | na |
| chrUn | 4060335 | 4060893 | 559 SAT1_CF  | blue | na |
| chrUn | 4060905 | 4062445 | 1541 SAT1_CF | blue | na |
| chrUn | 4062458 | 4062860 | 403 SAT1_CF  | blue | na |
| chrUn | 4062900 | 4063400 | 501 SAT1_CF  | blue | na |
| chrUn | 4063413 | 4063521 | 109 SAT1_CF  | blue | na |
| chrUn | 4063542 | 4064376 | 835 SAT1_CF  | blue | na |
| chrUn | 4064401 | 4065190 | 790 SAT1_CF  | blue | na |
| chrUn | 4065233 | 4066983 | 1751 SAT1_CF | blue | na |
| chrUn | 4067008 | 4067333 | 326 SAT1_CF  | blue | na |
| chrUn | 4067412 | 4068322 | 911 SAT1_CF  | blue | na |
| chrUn | 4068411 | 4068911 | 501 SAT1_CF  | blue | na |
| chrUn | 4068924 | 4070296 | 1373 SAT1_CF | blue | na |
| chrUn | 4070339 | 4071330 | 992 SAT1_CF  | blue | na |
| chrUn | 4071352 | 4071897 | 546 SAT1_CF  | blue | na |
| chrUn | 4071908 | 4072142 | 235 SAT1_CF  | blue | na |
| chrUn | 4072322 | 4072455 | 134 SAT1_CF  | blue | na |
| chrUn | 4072561 | 4073032 | 472 SAT1_CF  | blue | na |
| chrUn | 4073055 | 4075089 | 2035 SAT1_CF | blue | na |
| chrUn | 4075176 | 4075677 | 502 SAT1_CF  | blue | na |
| chrUn | 4075690 | 4076450 | 761 SAT1_CF  | blue | na |
| chrUn | 4076463 | 4077828 | 1366 SAT1_CF | blue | na |
| chrUn | 4077871 | 4079900 | 2030 SAT1_CF | blue | na |
| chrUn | 4079913 | 4080414 | 502 SAT1_CF  | blue | na |
| chrUn | 4080427 | 4081773 | 1347 SAT1_CF | blue | na |
| chrUn | 4081801 | 4082359 | 559 SAT1_CF  | blue | na |
| chrUn | 4082443 | 4082990 | 548 SAT1_CF  | blue | na |
| chrUn | 4083018 | 4083154 | 137 SAT1_CF  | blue | na |
| chrUn | 4083220 | 4083718 | 499 SAT1_CF  | blue | na |
| chrUn | 4083741 | 4084413 | 673 SAT1_CF  | blue | na |
| chrUn | 4084425 | 4085261 | 837 SAT1_CF  | blue | na |
| chrUn | 4085303 | 4086341 | 1039 SAT1_CF | blue | na |
| chrUn | 4086398 | 4087030 | 633 SAT1_CF  | blue | na |
| chrUn | 4087042 | 4087645 | 604 SAT1_CF  | blue | na |
| chrUn | 4087667 | 4088336 | 670 SAT1_CF  | blue | na |
| chrUn | 4088348 | 4089212 | 865 SAT1_CF  | blue | na |
| chrUn | 4089254 | 4092289 | 3036 SAT1_CF | blue | na |
| chrUn | 4092471 | 4092652 | 182 SAT1_CF  | blue | na |



|       |         |         |              |      |    |
|-------|---------|---------|--------------|------|----|
| chrUn | 4092673 | 4093192 | 520 SAT1_CF  | blue | na |
| chrUn | 4093205 | 4093310 | 106 SAT1_CF  | blue | na |
| chrUn | 4093332 | 4095060 | 1729 SAT1_CF | blue | na |
| chrUn | 4095083 | 4095571 | 489 SAT1_CF  | blue | na |
| chrUn | 4095666 | 4096186 | 521 SAT1_CF  | blue | na |
| chrUn | 4096208 | 4097038 | 831 SAT1_CF  | blue | na |
| chrUn | 4097065 | 4098202 | 1138 SAT1_CF | blue | na |
| chrUn | 4098244 | 4098785 | 542 SAT1_CF  | blue | na |
| chrUn | 4098824 | 4100099 | 1276 SAT1_CF | blue | na |
| chrUn | 4100139 | 4100641 | 503 SAT1_CF  | blue | na |
| chrUn | 4100654 | 4103215 | 2562 SAT1_CF | blue | na |
| chrUn | 4103257 | 4104039 | 783 SAT1_CF  | blue | na |
| chrUn | 4104118 | 4104626 | 509 SAT1_CF  | blue | na |
| chrUn | 4104640 | 4104995 | 356 SAT1_CF  | blue | na |
| chrUn | 4105082 | 4105584 | 503 SAT1_CF  | blue | na |
| chrUn | 4105597 | 4106268 | 672 SAT1_CF  | blue | na |
| chrUn | 4106317 | 4107842 | 1526 SAT1_CF | blue | na |
| chrUn | 4107948 | 4108312 | 365 SAT1_CF  | blue | na |
| chrUn | 4108367 | 4108869 | 503 SAT1_CF  | blue | na |
| chrUn | 4108882 | 4108988 | 107 SAT1_CF  | blue | na |
| chrUn | 4109010 | 4109568 | 559 SAT1_CF  | blue | na |
| chrUn | 4109580 | 4111956 | 2377 SAT1_CF | blue | na |
| chrUn | 4111969 | 4112324 | 356 SAT1_CF  | blue | na |
| chrUn | 4112440 | 4112960 | 521 SAT1_CF  | blue | na |
| chrUn | 4112991 | 4114064 | 1074 SAT1_CF | blue | na |
| chrUn | 4114078 | 4114599 | 522 SAT1_CF  | blue | na |
| chrUn | 4114633 | 4114965 | 333 SAT1_CF  | blue | na |
| chrUn | 4115052 | 4115553 | 502 SAT1_CF  | blue | na |
| chrUn | 4115566 | 4116248 | 683 SAT1_CF  | blue | na |
| chrUn | 4116260 | 4117712 | 1453 SAT1_CF | blue | na |
| chrUn | 4117725 | 4118299 | 575 SAT1_CF  | blue | na |
| chrUn | 4118432 | 4119127 | 696 SAT1_CF  | blue | na |
| chrUn | 4119192 | 4119972 | 781 SAT1_CF  | blue | na |
| chrUn | 4120034 | 4121730 | 1697 SAT1_CF | blue | na |
| chrUn | 4121743 | 4122502 | 760 SAT1_CF  | blue | na |
| chrUn | 4122514 | 4123222 | 709 SAT1_CF  | blue | na |
| chrUn | 4123264 | 4124705 | 1442 SAT1_CF | blue | na |
| chrUn | 4124719 | 4125121 | 403 SAT1_CF  | blue | na |
| chrUn | 4125161 | 4125783 | 623 SAT1_CF  | blue | na |
| chrUn | 4125804 | 4126358 | 555 SAT1_CF  | blue | na |
| chrUn | 4126370 | 4126478 | 109 SAT1_CF  | blue | na |
| chrUn | 4126499 | 4127044 | 546 SAT1_CF  | blue | na |

|       |         |         |              |      |    |
|-------|---------|---------|--------------|------|----|
| chrUn | 4127087 | 4127920 | 834 SAT1_CF  | blue | na |
| chrUn | 4128110 | 4129875 | 1766 SAT1_CF | blue | na |
| chrUn | 4129888 | 4130648 | 761 SAT1_CF  | blue | na |
| chrUn | 4130666 | 4130768 | 103 SAT1_CF  | blue | na |
| chrUn | 4130789 | 4132317 | 1529 SAT1_CF | blue | na |
| chrUn | 4132329 | 4133695 | 1367 SAT1_CF | blue | na |
| chrUn | 4133759 | 4134321 | 563 SAT1_CF  | blue | na |
| chrUn | 4134364 | 4134916 | 553 SAT1_CF  | blue | na |
| chrUn | 4134928 | 4135539 | 612 SAT1_CF  | blue | na |
| chrUn | 4135562 | 4136227 | 666 SAT1_CF  | blue | na |
| chrUn | 4136270 | 4138311 | 2042 SAT1_CF | blue | na |
| chrUn | 4138351 | 4138853 | 503 SAT1_CF  | blue | na |
| chrUn | 4138866 | 4138971 | 106 SAT1_CF  | blue | na |
| chrUn | 4140376 | 4140893 | 518 SAT1_CF  | blue | na |
| chrUn | 4141021 | 4142699 | 1679 SAT1_CF | blue | na |
| chrUn | 4142711 | 4143364 | 654 SAT1_CF  | blue | na |
| chrUn | 4143444 | 4143670 | 227 SAT1_CF  | blue | na |
| chrUn | 4143681 | 4144217 | 537 SAT1_CF  | blue | na |
| chrUn | 4144235 | 4144553 | 319 SAT1_CF  | blue | na |
| chrUn | 4144606 | 4145108 | 503 SAT1_CF  | blue | na |
| chrUn | 4145121 | 4145960 | 840 SAT1_CF  | blue | na |
| chrUn | 4145972 | 4147233 | 1262 SAT1_CF | blue | na |
| chrUn | 4147269 | 4148279 | 1011 SAT1_CF | blue | na |
| chrUn | 4148345 | 4148930 | 586 SAT1_CF  | blue | na |
| chrUn | 4149012 | 4149554 | 543 SAT1_CF  | blue | na |
| chrUn | 4149567 | 4150069 | 503 SAT1_CF  | blue | na |
| chrUn | 4150081 | 4150762 | 682 SAT1_CF  | blue | na |
| chrUn | 4150776 | 4151450 | 675 SAT1_CF  | blue | na |
| chrUn | 4151530 | 4152041 | 512 SAT1_CF  | blue | na |
| chrUn | 4152069 | 4152820 | 752 SAT1_CF  | blue | na |
| chrUn | 4152851 | 4153377 | 527 SAT1_CF  | blue | na |
| chrUn | 4153421 | 4154872 | 1452 SAT1_CF | blue | na |
| chrUn | 4154912 | 4155414 | 503 SAT1_CF  | blue | na |
| chrUn | 4155427 | 4156111 | 685 SAT1_CF  | blue | na |
| chrUn | 4156123 | 4157457 | 1335 SAT1_CF | blue | na |
| chrUn | 4157501 | 4158833 | 1333 SAT1_CF | blue | na |
| chrUn | 4158920 | 4159421 | 502 SAT1_CF  | blue | na |
| chrUn | 4159448 | 4160283 | 836 SAT1_CF  | blue | na |
| chrUn | 4160302 | 4160821 | 520 SAT1_CF  | blue | na |
| chrUn | 4160833 | 4161693 | 861 SAT1_CF  | blue | na |
| chrUn | 4161736 | 4162525 | 790 SAT1_CF  | blue | na |
| chrUn | 4162569 | 4163109 | 541 SAT1_CF  | blue | na |

|       |         |         |              |      |    |
|-------|---------|---------|--------------|------|----|
| chrUn | 4163121 | 4163694 | 574 SAT1_CF  | blue | na |
| chrUn | 4163949 | 4164083 | 135 SAT1_CF  | blue | na |
| chrUn | 4164149 | 4164649 | 501 SAT1_CF  | blue | na |
| chrUn | 4164662 | 4164767 | 106 SAT1_CF  | blue | na |
| chrUn | 4164790 | 4166485 | 1696 SAT1_CF | blue | na |
| chrUn | 4166498 | 4167258 | 761 SAT1_CF  | blue | na |
| chrUn | 4167270 | 4167953 | 684 SAT1_CF  | blue | na |
| chrUn | 4167965 | 4168750 | 786 SAT1_CF  | blue | na |
| chrUn | 4168795 | 4169297 | 503 SAT1_CF  | blue | na |
| chrUn | 4169310 | 4169991 | 682 SAT1_CF  | blue | na |
| chrUn | 4170003 | 4170679 | 677 SAT1_CF  | blue | na |
| chrUn | 4170722 | 4171270 | 549 SAT1_CF  | blue | na |
| chrUn | 4171313 | 4171876 | 564 SAT1_CF  | blue | na |
| chrUn | 4171918 | 4172699 | 782 SAT1_CF  | blue | na |
| chrUn | 4172742 | 4173285 | 544 SAT1_CF  | blue | na |
| chrUn | 4173298 | 4174133 | 836 SAT1_CF  | blue | na |
| chrUn | 4174146 | 4174848 | 703 SAT1_CF  | blue | na |
| chrUn | 4174870 | 4176340 | 1471 SAT1_CF | blue | na |
| chrUn | 4176365 | 4176926 | 562 SAT1_CF  | blue | na |
| chrUn | 4177013 | 4177513 | 501 SAT1_CF  | blue | na |
| chrUn | 4177526 | 4178718 | 1193 SAT1_CF | blue | na |
| chrUn | 4178729 | 4179575 | 847 SAT1_CF  | blue | na |
| chrUn | 4179619 | 4180167 | 549 SAT1_CF  | blue | na |
| chrUn | 4180180 | 4180285 | 106 SAT1_CF  | blue | na |
| chrUn | 4180308 | 4181319 | 1012 SAT1_CF | blue | na |
| chrUn | 4181376 | 4181708 | 333 SAT1_CF  | blue | na |
| chrUn | 4181795 | 4182296 | 502 SAT1_CF  | blue | na |
| chrUn | 4182313 | 4183534 | 1222 SAT1_CF | blue | na |
| chrUn | 4183583 | 4183675 | 93 SAT1_CF   | blue | na |
| chrUn | 4183732 | 4184281 | 550 SAT1_CF  | blue | na |
| chrUn | 4184295 | 4184908 | 614 SAT1_CF  | blue | na |
| chrUn | 4184920 | 4185770 | 851 SAT1_CF  | blue | na |
| chrUn | 4185821 | 4187010 | 1190 SAT1_CF | blue | na |
| chrUn | 4187090 | 4187613 | 524 SAT1_CF  | blue | na |
| chrUn | 4187628 | 4187763 | 136 SAT1_CF  | blue | na |
| chrUn | 4187829 | 4188331 | 503 SAT1_CF  | blue | na |
| chrUn | 4188344 | 4189674 | 1331 SAT1_CF | blue | na |
| chrUn | 4189757 | 4190384 | 628 SAT1_CF  | blue | na |
| chrUn | 4190401 | 4190949 | 549 SAT1_CF  | blue | na |
| chrUn | 4190977 | 4191680 | 704 SAT1_CF  | blue | na |
| chrUn | 4191703 | 4192374 | 672 SAT1_CF  | blue | na |
| chrUn | 4192386 | 4192459 | 74 SAT1_CF   | blue | na |

|       |         |         |              |      |    |
|-------|---------|---------|--------------|------|----|
| chrUn | 4192515 | 4193060 | 546 SAT1_CF  | blue | na |
| chrUn | 4193156 | 4193697 | 542 SAT1_CF  | blue | na |
| chrUn | 4193741 | 4195130 | 1390 SAT1_CF | blue | na |
| chrUn | 4195172 | 4195664 | 493 SAT1_CF  | blue | na |
| chrUn | 4195684 | 4196354 | 671 SAT1_CF  | blue | na |
| chrUn | 4196375 | 4197075 | 701 SAT1_CF  | blue | na |
| chrUn | 4197087 | 4197948 | 862 SAT1_CF  | blue | na |
| chrUn | 4197990 | 4198769 | 780 SAT1_CF  | blue | na |
| chrUn | 4198849 | 4199796 | 948 SAT1_CF  | blue | na |
| chrUn | 4199809 | 4202006 | 2198 SAT1_CF | blue | na |
| chrUn | 4202027 | 4202547 | 521 SAT1_CF  | blue | na |
| chrUn | 4202560 | 4203263 | 704 SAT1_CF  | blue | na |
| chrUn | 4203275 | 4203952 | 678 SAT1_CF  | blue | na |
| chrUn | 4203995 | 4204539 | 545 SAT1_CF  | blue | na |
| chrUn | 4204672 | 4205368 | 697 SAT1_CF  | blue | na |
| chrUn | 4205433 | 4205590 | 158 SAT1_CF  | blue | na |
| chrUn | 4205635 | 4206222 | 588 SAT1_CF  | blue | na |
| chrUn | 4206277 | 4207521 | 1245 SAT1_CF | blue | na |
| chrUn | 4207564 | 4208561 | 998 SAT1_CF  | blue | na |
| chrUn | 4208605 | 4209846 | 1242 SAT1_CF | blue | na |
| chrUn | 4209890 | 4211095 | 1206 SAT1_CF | blue | na |
| chrUn | 4211122 | 4211685 | 564 SAT1_CF  | blue | na |
| chrUn | 4211765 | 4212077 | 313 SAT1_CF  | blue | na |
| chrUn | 4212096 | 4212638 | 543 SAT1_CF  | blue | na |
| chrUn | 4212709 | 4213339 | 631 SAT1_CF  | blue | na |
| chrUn | 4213351 | 4213460 | 110 SAT1_CF  | blue | na |
| chrUn | 4213481 | 4214510 | 1030 SAT1_CF | blue | na |
| chrUn | 4214530 | 4215139 | 610 SAT1_CF  | blue | na |
| chrUn | 4215182 | 4215384 | 203 SAT1_CF  | blue | na |
| chrUn | 4215565 | 4215750 | 186 SAT1_CF  | blue | na |
| chrUn | 4215767 | 4216286 | 520 SAT1_CF  | blue | na |
| chrUn | 4216299 | 4216980 | 682 SAT1_CF  | blue | na |
| chrUn | 4216992 | 4217675 | 684 SAT1_CF  | blue | na |
| chrUn | 4217687 | 4219017 | 1331 SAT1_CF | blue | na |
| chrUn | 4219061 | 4219620 | 560 SAT1_CF  | blue | na |
| chrUn | 4219704 | 4220250 | 547 SAT1_CF  | blue | na |
| chrUn | 4220278 | 4220413 | 136 SAT1_CF  | blue | na |
| chrUn | 4220479 | 4220980 | 502 SAT1_CF  | blue | na |
| chrUn | 4221003 | 4222073 | 1071 SAT1_CF | blue | na |
| chrUn | 4222086 | 4223846 | 1761 SAT1_CF | blue | na |
| chrUn | 4223867 | 4224390 | 524 SAT1_CF  | blue | na |
| chrUn | 4224433 | 4224802 | 370 SAT1_CF  | blue | na |

|       |         |         |              |      |    |
|-------|---------|---------|--------------|------|----|
| chrUn | 4224842 | 4225344 | 503 SAT1_CF  | blue | na |
| chrUn | 4225357 | 4226039 | 683 SAT1_CF  | blue | na |
| chrUn | 4226051 | 4226812 | 762 SAT1_CF  | blue | na |
| chrUn | 4226824 | 4228156 | 1333 SAT1_CF | blue | na |
| chrUn | 4228199 | 4228571 | 373 SAT1_CF  | blue | na |
| chrUn | 4228607 | 4229109 | 503 SAT1_CF  | blue | na |
| chrUn | 4229121 | 4229230 | 110 SAT1_CF  | blue | na |
| chrUn | 4229251 | 4229798 | 548 SAT1_CF  | blue | na |
| chrUn | 4229841 | 4231357 | 1517 SAT1_CF | blue | na |
| chrUn | 4231405 | 4232185 | 781 SAT1_CF  | blue | na |
| chrUn | 4232240 | 4233298 | 1059 SAT1_CF | blue | na |
| chrUn | 4233375 | 4233917 | 543 SAT1_CF  | blue | na |
| chrUn | 4233930 | 4234036 | 107 SAT1_CF  | blue | na |
| chrUn | 4234059 | 4235033 | 975 SAT1_CF  | blue | na |
| chrUn | 4235090 | 4235698 | 609 SAT1_CF  | blue | na |
| chrUn | 4235709 | 4236109 | 401 SAT1_CF  | blue | na |
| chrUn | 4236148 | 4236650 | 503 SAT1_CF  | blue | na |
| chrUn | 4236663 | 4238217 | 1555 SAT1_CF | blue | na |
| chrUn | 4238259 | 4238803 | 545 SAT1_CF  | blue | na |
| chrUn | 4238819 | 4240538 | 1720 SAT1_CF | blue | na |
| chrUn | 4240561 | 4240996 | 436 SAT1_CF  | blue | na |
| chrUn | 4241010 | 4241117 | 108 SAT1_CF  | blue | na |
| chrUn | 4241139 | 4241419 | 281 SAT1_CF  | blue | na |
| chrUn | 4241602 | 4241881 | 280 SAT1_CF  | blue | na |
| chrUn | 4241894 | 4243740 | 1847 SAT1_CF | blue | na |
| chrUn | 4243784 | 4244286 | 503 SAT1_CF  | blue | na |
| chrUn | 4244297 | 4244972 | 676 SAT1_CF  | blue | na |
| chrUn | 4245015 | 4245740 | 726 SAT1_CF  | blue | na |
| chrUn | 4245785 | 4246320 | 536 SAT1_CF  | blue | na |
| chrUn | 4246342 | 4246859 | 518 SAT1_CF  | blue | na |
| chrUn | 4246871 | 4248187 | 1317 SAT1_CF | blue | na |
| chrUn | 4248200 | 4248602 | 403 SAT1_CF  | blue | na |
| chrUn | 4248642 | 4249144 | 503 SAT1_CF  | blue | na |
| chrUn | 4249157 | 4250527 | 1371 SAT1_CF | blue | na |
| chrUn | 4250570 | 4251534 | 965 SAT1_CF  | blue | na |
| chrUn | 4251650 | 4252563 | 914 SAT1_CF  | blue | na |
| chrUn | 4252631 | 4253150 | 520 SAT1_CF  | blue | na |
| chrUn | 4253163 | 4253846 | 684 SAT1_CF  | blue | na |
| chrUn | 4253858 | 4254520 | 663 SAT1_CF  | blue | na |
| chrUn | 4254563 | 4255190 | 628 SAT1_CF  | blue | na |
| chrUn | 4255218 | 4256423 | 1206 SAT1_CF | blue | na |
| chrUn | 4256438 | 4256574 | 137 SAT1_CF  | blue | na |

|       |         |         |              |      |    |
|-------|---------|---------|--------------|------|----|
| chrUn | 4256621 | 4257137 | 517 SAT1_CF  | blue | na |
| chrUn | 4257150 | 4257833 | 684 SAT1_CF  | blue | na |
| chrUn | 4257845 | 4258526 | 682 SAT1_CF  | blue | na |
| chrUn | 4258540 | 4259216 | 677 SAT1_CF  | blue | na |
| chrUn | 4259260 | 4259834 | 575 SAT1_CF  | blue | na |
| chrUn | 4259923 | 4260420 | 498 SAT1_CF  | blue | na |
| chrUn | 4260433 | 4261184 | 752 SAT1_CF  | blue | na |
| chrUn | 4261207 | 4262419 | 1213 SAT1_CF | blue | na |
| chrUn | 4262445 | 4263242 | 798 SAT1_CF  | blue | na |
| chrUn | 4263422 | 4263603 | 182 SAT1_CF  | blue | na |
| chrUn | 4263642 | 4264142 | 501 SAT1_CF  | blue | na |
| chrUn | 4264155 | 4265519 | 1365 SAT1_CF | blue | na |
| chrUn | 4265562 | 4266527 | 966 SAT1_CF  | blue | na |
| chrUn | 4266574 | 4267720 | 1147 SAT1_CF | blue | na |
| chrUn | 4267743 | 4268267 | 525 SAT1_CF  | blue | na |
| chrUn | 4268324 | 4270879 | 2556 SAT1_CF | blue | na |
| chrUn | 4270988 | 4271487 | 500 SAT1_CF  | blue | na |
| chrUn | 4271505 | 4272174 | 670 SAT1_CF  | blue | na |
| chrUn | 4272244 | 4272707 | 464 SAT1_CF  | blue | na |
| chrUn | 4272719 | 4273536 | 818 SAT1_CF  | blue | na |
| chrUn | 4273554 | 4273657 | 104 SAT1_CF  | blue | na |
| chrUn | 4273678 | 4274233 | 556 SAT1_CF  | blue | na |
| chrUn | 4274245 | 4277093 | 2849 SAT1_CF | blue | na |
| chrUn | 4277148 | 4277640 | 493 SAT1_CF  | blue | na |
| chrUn | 4277674 | 4278334 | 661 SAT1_CF  | blue | na |
| chrUn | 4278377 | 4280402 | 2026 SAT1_CF | blue | na |
| chrUn | 4280419 | 4281720 | 1302 SAT1_CF | blue | na |
| chrUn | 4281760 | 4282261 | 502 SAT1_CF  | blue | na |
| chrUn | 4282274 | 4282957 | 684 SAT1_CF  | blue | na |
| chrUn | 4282969 | 4283693 | 725 SAT1_CF  | blue | na |
| chrUn | 4283704 | 4284196 | 493 SAT1_CF  | blue | na |
| chrUn | 4284210 | 4286418 | 2209 SAT1_CF | blue | na |
| chrUn | 4287833 | 4288405 | 573 SAT1_CF  | blue | na |
| chrUn | 4288445 | 4288938 | 494 SAT1_CF  | blue | na |
| chrUn | 4288958 | 4289640 | 683 SAT1_CF  | blue | na |
| chrUn | 4289652 | 4290329 | 678 SAT1_CF  | blue | na |
| chrUn | 4290371 | 4291336 | 966 SAT1_CF  | blue | na |
| chrUn | 4291415 | 4292328 | 914 SAT1_CF  | blue | na |
| chrUn | 4292415 | 4292917 | 503 SAT1_CF  | blue | na |
| chrUn | 4292944 | 4293034 | 91 SAT1_CF   | blue | na |
| chrUn | 4293058 | 4295764 | 2707 SAT1_CF | blue | na |
| chrUn | 4295807 | 4296307 | 501 SAT1_CF  | blue | na |

|       |         |         |              |      |    |
|-------|---------|---------|--------------|------|----|
| chrUn | 4296325 | 4297004 | 680 SAT1_CF  | blue | na |
| chrUn | 4297016 | 4297125 | 110 SAT1_CF  | blue | na |
| chrUn | 4297145 | 4297689 | 545 SAT1_CF  | blue | na |
| chrUn | 4297733 | 4298842 | 1110 SAT1_CF | blue | na |
| chrUn | 4298887 | 4299768 | 882 SAT1_CF  | blue | na |
| chrUn | 4299808 | 4300926 | 1119 SAT1_CF | blue | na |
| chrUn | 4300937 | 4301014 | 78 SAT1_CF   | blue | na |
| chrUn | 4301033 | 4301585 | 553 SAT1_CF  | blue | na |
| chrUn | 4301620 | 4302186 | 567 SAT1_CF  | blue | na |
| chrUn | 4302224 | 4302718 | 495 SAT1_CF  | blue | na |
| chrUn | 4302738 | 4303855 | 1118 SAT1_CF | blue | na |
| chrUn | 4303869 | 4305237 | 1369 SAT1_CF | blue | na |
| chrUn | 4305283 | 4306643 | 1361 SAT1_CF | blue | na |
| chrUn | 4306672 | 4307193 | 522 SAT1_CF  | blue | na |
| chrUn | 4307206 | 4307909 | 704 SAT1_CF  | blue | na |
| chrUn | 4307921 | 4308597 | 677 SAT1_CF  | blue | na |
| chrUn | 4308645 | 4309602 | 958 SAT1_CF  | blue | na |
| chrUn | 4309681 | 4310628 | 948 SAT1_CF  | blue | na |
| chrUn | 4310681 | 4311543 | 863 SAT1_CF  | blue | na |
| chrUn | 4311569 | 4312050 | 482 SAT1_CF  | blue | na |
| chrUn | 4312063 | 4312735 | 673 SAT1_CF  | blue | na |
| chrUn | 4312747 | 4312914 | 168 SAT1_CF  | blue | na |
| chrUn | 4312927 | 4312967 | 41 SAT1_CF   | blue | na |
| chrUn | 4312999 | 4314078 | 1080 SAT1_CF | blue | na |
| chrUn | 4314121 | 4314675 | 555 SAT1_CF  | blue | na |
| chrUn | 4314687 | 4315461 | 775 SAT1_CF  | blue | na |
| chrUn | 4315479 | 4315949 | 471 SAT1_CF  | blue | na |
| chrUn | 4315983 | 4316503 | 521 SAT1_CF  | blue | na |
| chrUn | 4316516 | 4318695 | 2180 SAT1_CF | blue | na |
| chrUn | 4318738 | 4319244 | 507 SAT1_CF  | blue | na |
| chrUn | 4319277 | 4319413 | 137 SAT1_CF  | blue | na |
| chrUn | 4319460 | 4320669 | 1210 SAT1_CF | blue | na |
| chrUn | 4320739 | 4321372 | 634 SAT1_CF  | blue | na |
| chrUn | 4321384 | 4322060 | 677 SAT1_CF  | blue | na |
| chrUn | 4322078 | 4322719 | 642 SAT1_CF  | blue | na |
| chrUn | 4322762 | 4323694 | 933 SAT1_CF  | blue | na |
| chrUn | 4323705 | 4324105 | 401 SAT1_CF  | blue | na |
| chrUn | 4324145 | 4324647 | 503 SAT1_CF  | blue | na |
| chrUn | 4324661 | 4325420 | 760 SAT1_CF  | blue | na |
| chrUn | 4325432 | 4326983 | 1552 SAT1_CF | blue | na |
| chrUn | 4327041 | 4328365 | 1325 SAT1_CF | blue | na |
| chrUn | 4328376 | 4328916 | 541 SAT1_CF  | blue | na |

|       |         |         |              |      |    |
|-------|---------|---------|--------------|------|----|
| chrUn | 4328930 | 4329612 | 683 SAT1_CF  | blue | na |
| chrUn | 4329624 | 4330303 | 680 SAT1_CF  | blue | na |
| chrUn | 4330314 | 4330916 | 603 SAT1_CF  | blue | na |
| chrUn | 4330928 | 4332155 | 1228 SAT1_CF | blue | na |
| chrUn | 4332173 | 4332859 | 687 SAT1_CF  | blue | na |
| chrUn | 4332871 | 4333719 | 849 SAT1_CF  | blue | na |
| chrUn | 4333732 | 4333774 | 43 SAT1_CF   | blue | na |
| chrUn | 4333804 | 4335577 | 1774 SAT1_CF | blue | na |
| chrUn | 4335664 | 4336164 | 501 SAT1_CF  | blue | na |
| chrUn | 4336191 | 4336936 | 746 SAT1_CF  | blue | na |
| chrUn | 4336948 | 4338155 | 1208 SAT1_CF | blue | na |
| chrUn | 4338626 | 4339236 | 611 SAT1_CF  | blue | na |
| chrUn | 4339247 | 4339647 | 401 SAT1_CF  | blue | na |
| chrUn | 4339687 | 4341530 | 1844 SAT1_CF | blue | na |
| chrUn | 4341576 | 4342135 | 560 SAT1_CF  | blue | na |
| chrUn | 4342219 | 4342766 | 548 SAT1_CF  | blue | na |
| chrUn | 4342794 | 4342930 | 137 SAT1_CF  | blue | na |
| chrUn | 4342996 | 4343497 | 502 SAT1_CF  | blue | na |
| chrUn | 4343520 | 4344191 | 672 SAT1_CF  | blue | na |
| chrUn | 4344203 | 4344312 | 110 SAT1_CF  | blue | na |
| chrUn | 4344333 | 4344916 | 584 SAT1_CF  | blue | na |
| chrUn | 4344945 | 4345488 | 544 SAT1_CF  | blue | na |
| chrUn | 4345533 | 4346338 | 806 SAT1_CF  | blue | na |
| chrUn | 4346425 | 4347388 | 964 SAT1_CF  | blue | na |
| chrUn | 4347416 | 4347551 | 136 SAT1_CF  | blue | na |
| chrUn | 4347598 | 4348082 | 485 SAT1_CF  | blue | na |
| chrUn | 4348095 | 4348769 | 675 SAT1_CF  | blue | na |
| chrUn | 4348787 | 4348954 | 168 SAT1_CF  | blue | na |
| chrUn | 4348996 | 4349681 | 686 SAT1_CF  | blue | na |
| chrUn | 4349709 | 4350806 | 1098 SAT1_CF | blue | na |
| chrUn | 4350913 | 4351392 | 480 SAT1_CF  | blue | na |
| chrUn | 4351410 | 4352595 | 1186 SAT1_CF | blue | na |
| chrUn | 4352662 | 4353029 | 368 SAT1_CF  | blue | na |
| chrUn | 4353225 | 4353356 | 132 SAT1_CF  | blue | na |
| chrUn | 4353400 | 4353922 | 523 SAT1_CF  | blue | na |
| chrUn | 4353938 | 4356441 | 2504 SAT1_CF | blue | na |
| chrUn | 4356453 | 4358007 | 1555 SAT1_CF | blue | na |
| chrUn | 4358030 | 4360263 | 2234 SAT1_CF | blue | na |
| chrUn | 4360276 | 4360883 | 608 SAT1_CF  | blue | na |
| chrUn | 4360929 | 4361107 | 179 SAT1_CF  | blue | na |
| chrUn | 4361155 | 4361677 | 523 SAT1_CF  | blue | na |
| chrUn | 4361759 | 4361937 | 179 SAT1_CF  | blue | na |



|       |         |         |              |      |    |
|-------|---------|---------|--------------|------|----|
| chrUn | 4361998 | 4363200 | 1203 SAT1_CF | blue | na |
| chrUn | 4363243 | 4363874 | 632 SAT1_CF  | blue | na |
| chrUn | 4363902 | 4364963 | 1062 SAT1_CF | blue | na |
| chrUn | 4365050 | 4365551 | 502 SAT1_CF  | blue | na |
| chrUn | 4365564 | 4365670 | 107 SAT1_CF  | blue | na |
| chrUn | 4365693 | 4366916 | 1224 SAT1_CF | blue | na |
| chrUn | 4366980 | 4367136 | 157 SAT1_CF  | blue | na |
| chrUn | 4367181 | 4367682 | 502 SAT1_CF  | blue | na |
| chrUn | 4367700 | 4367764 | 65 SAT1_CF   | blue | na |
| chrUn | 4367789 | 4368516 | 728 SAT1_CF  | blue | na |
| chrUn | 4368558 | 4370365 | 1808 SAT1_CF | blue | na |
| chrUn | 4370454 | 4370954 | 501 SAT1_CF  | blue | na |
| chrUn | 4370967 | 4373950 | 2984 SAT1_CF | blue | na |
| chrUn | 4373962 | 4376147 | 2186 SAT1_CF | blue | na |
| chrUn | 4376160 | 4376839 | 680 SAT1_CF  | blue | na |
| chrUn | 4376850 | 4377520 | 671 SAT1_CF  | blue | na |
| chrUn | 4377563 | 4378194 | 632 SAT1_CF  | blue | na |
| chrUn | 4378222 | 4378786 | 565 SAT1_CF  | blue | na |
| chrUn | 4378828 | 4379144 | 317 SAT1_CF  | blue | na |
| chrUn | 4379172 | 4379656 | 485 SAT1_CF  | blue | na |
| chrUn | 4379917 | 4380946 | 1030 SAT1_CF | blue | na |
| chrUn | 4380976 | 4381757 | 782 SAT1_CF  | blue | na |
| chrUn | 4381789 | 4382795 | 1007 SAT1_CF | blue | na |
| chrUn | 4382833 | 4383334 | 502 SAT1_CF  | blue | na |
| chrUn | 4383356 | 4384107 | 752 SAT1_CF  | blue | na |
| chrUn | 4384120 | 4385241 | 1122 SAT1_CF | blue | na |
| chrUn | 4385320 | 4387323 | 2004 SAT1_CF | blue | na |
| chrUn | 4387334 | 4387983 | 650 SAT1_CF  | blue | na |
| chrUn | 4388026 | 4388993 | 968 SAT1_CF  | blue | na |
| chrUn | 4389026 | 4389402 | 377 SAT1_CF  | blue | na |
| chrUn | 4389445 | 4389947 | 503 SAT1_CF  | blue | na |
| chrUn | 4389960 | 4390951 | 992 SAT1_CF  | blue | na |
| chrUn | 4390963 | 4392101 | 1139 SAT1_CF | blue | na |
| chrUn | 4392115 | 4392636 | 522 SAT1_CF  | blue | na |
| chrUn | 4392702 | 4392838 | 137 SAT1_CF  | blue | na |
| chrUn | 4392905 | 4393404 | 500 SAT1_CF  | blue | na |
| chrUn | 4393417 | 4394738 | 1322 SAT1_CF | blue | na |
| chrUn | 4394753 | 4395454 | 702 SAT1_CF  | blue | na |
| chrUn | 4395466 | 4395573 | 108 SAT1_CF  | blue | na |
| chrUn | 4395594 | 4396148 | 555 SAT1_CF  | blue | na |
| chrUn | 4396161 | 4396827 | 667 SAT1_CF  | blue | na |
| chrUn | 4396870 | 4397850 | 981 SAT1_CF  | blue | na |

|       |         |         |              |      |    |
|-------|---------|---------|--------------|------|----|
| chrUn | 4397866 | 4398051 | 186 SAT1_CF  | blue | na |
| chrUn | 4398065 | 4399055 | 991 SAT1_CF  | blue | na |
| chrUn | 4399083 | 4399240 | 158 SAT1_CF  | blue | na |
| chrUn | 4399285 | 4399787 | 503 SAT1_CF  | blue | na |
| chrUn | 4399800 | 4399876 | 77 SAT1_CF   | blue | na |
| chrUn | 4399929 | 4400967 | 1039 SAT1_CF | blue | na |
| chrUn | 4400981 | 4401118 | 138 SAT1_CF  | blue | na |
| chrUn | 4401214 | 4402347 | 1134 SAT1_CF | blue | na |
| chrUn | 4402359 | 4403544 | 1186 SAT1_CF | blue | na |
| chrUn | 4403558 | 4403912 | 355 SAT1_CF  | blue | na |
| chrUn | 4404018 | 4404586 | 569 SAT1_CF  | blue | na |
| chrUn | 4404607 | 4405953 | 1347 SAT1_CF | blue | na |
| chrUn | 4405995 | 4407970 | 1976 SAT1_CF | blue | na |
| chrUn | 4408013 | 4408551 | 539 SAT1_CF  | blue | na |
| chrUn | 4408633 | 4409196 | 564 SAT1_CF  | blue | na |
| chrUn | 4409274 | 4409900 | 627 SAT1_CF  | blue | na |
| chrUn | 4409912 | 4410585 | 674 SAT1_CF  | blue | na |
| chrUn | 4410628 | 4412666 | 2039 SAT1_CF | blue | na |
| chrUn | 4412706 | 4413201 | 496 SAT1_CF  | blue | na |
| chrUn | 4413220 | 4413902 | 683 SAT1_CF  | blue | na |
| chrUn | 4413914 | 4414583 | 670 SAT1_CF  | blue | na |
| chrUn | 4414626 | 4415582 | 957 SAT1_CF  | blue | na |
| chrUn | 4415649 | 4416682 | 1034 SAT1_CF | blue | na |
| chrUn | 4416716 | 4417236 | 521 SAT1_CF  | blue | na |
| chrUn | 4417263 | 4417892 | 630 SAT1_CF  | blue | na |
| chrUn | 4417905 | 4418546 | 642 SAT1_CF  | blue | na |
| chrUn | 4418591 | 4419798 | 1208 SAT1_CF | blue | na |
| chrUn | 4419809 | 4420506 | 698 SAT1_CF  | blue | na |
| chrUn | 4420518 | 4421628 | 1111 SAT1_CF | blue | na |
| chrUn | 4421642 | 4422325 | 684 SAT1_CF  | blue | na |
| chrUn | 4422337 | 4423014 | 678 SAT1_CF  | blue | na |
| chrUn | 4423056 | 4424036 | 981 SAT1_CF  | blue | na |
| chrUn | 4424115 | 4425111 | 997 SAT1_CF  | blue | na |
| chrUn | 4425151 | 4426345 | 1195 SAT1_CF | blue | na |
| chrUn | 4426356 | 4426848 | 493 SAT1_CF  | blue | na |
| chrUn | 4426862 | 4427352 | 491 SAT1_CF  | blue | na |
| chrUn | 4427366 | 4429992 | 2627 SAT1_CF | blue | na |
| chrUn | 4431561 | 4432089 | 529 SAT1_CF  | blue | na |
| chrUn | 4432157 | 4432676 | 520 SAT1_CF  | blue | na |
| chrUn | 4432689 | 4432797 | 109 SAT1_CF  | blue | na |
| chrUn | 4432818 | 4433363 | 546 SAT1_CF  | blue | na |
| chrUn | 4433406 | 4434406 | 1001 SAT1_CF | blue | na |

|       |         |         |              |      |    |
|-------|---------|---------|--------------|------|----|
| chrUn | 4434450 | 4435949 | 1500 SAT1_CF | blue | na |
| chrUn | 4435962 | 4437329 | 1368 SAT1_CF | blue | na |
| chrUn | 4437410 | 4437774 | 365 SAT1_CF  | blue | na |
| chrUn | 4437816 | 4438316 | 501 SAT1_CF  | blue | na |
| chrUn | 4438328 | 4439010 | 683 SAT1_CF  | blue | na |
| chrUn | 4439029 | 4439934 | 906 SAT1_CF  | blue | na |
| chrUn | 4439977 | 4440566 | 590 SAT1_CF  | blue | na |
| chrUn | 4440585 | 4441128 | 544 SAT1_CF  | blue | na |
| chrUn | 4441142 | 4441787 | 646 SAT1_CF  | blue | na |
| chrUn | 4441831 | 4442409 | 579 SAT1_CF  | blue | na |
| chrUn | 4442488 | 4443404 | 917 SAT1_CF  | blue | na |
| chrUn | 4443416 | 4443518 | 103 SAT1_CF  | blue | na |
| chrUn | 4443547 | 4444091 | 545 SAT1_CF  | blue | na |
| chrUn | 4444136 | 4445102 | 967 SAT1_CF  | blue | na |
| chrUn | 4445157 | 4445828 | 672 SAT1_CF  | blue | na |
| chrUn | 4445839 | 4447112 | 1274 SAT1_CF | blue | na |
| chrUn | 4447153 | 4448709 | 1557 SAT1_CF | blue | na |
| chrUn | 4448722 | 4449392 | 671 SAT1_CF  | blue | na |
| chrUn | 4449436 | 4449996 | 561 SAT1_CF  | blue | na |
| chrUn | 4450014 | 4451145 | 1132 SAT1_CF | blue | na |
| chrUn | 4451185 | 4451686 | 502 SAT1_CF  | blue | na |
| chrUn | 4451699 | 4452300 | 602 SAT1_CF  | blue | na |
| chrUn | 4452312 | 4452987 | 676 SAT1_CF  | blue | na |
| chrUn | 4453036 | 4453833 | 798 SAT1_CF  | blue | na |
| chrUn | 4453847 | 4454844 | 998 SAT1_CF  | blue | na |
| chrUn | 4454859 | 4454995 | 137 SAT1_CF  | blue | na |
| chrUn | 4455042 | 4455561 | 520 SAT1_CF  | blue | na |
| chrUn | 4455574 | 4455681 | 108 SAT1_CF  | blue | na |
| chrUn | 4455703 | 4456247 | 545 SAT1_CF  | blue | na |
| chrUn | 4456290 | 4457918 | 1629 SAT1_CF | blue | na |
| chrUn | 4457929 | 4458117 | 189 SAT1_CF  | blue | na |
| chrUn | 4458169 | 4458652 | 484 SAT1_CF  | blue | na |
| chrUn | 4458664 | 4459336 | 673 SAT1_CF  | blue | na |
| chrUn | 4459454 | 4459959 | 506 SAT1_CF  | blue | na |
| chrUn | 4459992 | 4460692 | 701 SAT1_CF  | blue | na |
| chrUn | 4460705 | 4461387 | 683 SAT1_CF  | blue | na |
| chrUn | 4461399 | 4462039 | 641 SAT1_CF  | blue | na |
| chrUn | 4462051 | 4463312 | 1262 SAT1_CF | blue | na |
| chrUn | 4463340 | 4463723 | 384 SAT1_CF  | blue | na |
| chrUn | 4463744 | 4464264 | 521 SAT1_CF  | blue | na |
| chrUn | 4464276 | 4464385 | 110 SAT1_CF  | blue | na |
| chrUn | 4464406 | 4465725 | 1320 SAT1_CF | blue | na |

|       |         |         |              |      |    |
|-------|---------|---------|--------------|------|----|
| chrUn | 4465768 | 4466311 | 544 SAT1_CF  | blue | na |
| chrUn | 4466333 | 4466429 | 97 SAT1_CF   | blue | na |
| chrUn | 4466450 | 4467004 | 555 SAT1_CF  | blue | na |
| chrUn | 4467016 | 4468352 | 1337 SAT1_CF | blue | na |
| chrUn | 4468377 | 4468699 | 323 SAT1_CF  | blue | na |
| chrUn | 4468770 | 4469287 | 518 SAT1_CF  | blue | na |
| chrUn | 4469352 | 4469910 | 559 SAT1_CF  | blue | na |
| chrUn | 4469922 | 4471785 | 1864 SAT1_CF | blue | na |
| chrUn | 4471816 | 4472341 | 526 SAT1_CF  | blue | na |
| chrUn | 4472356 | 4472490 | 135 SAT1_CF  | blue | na |
| chrUn | 4472558 | 4473059 | 502 SAT1_CF  | blue | na |
| chrUn | 4473073 | 4474291 | 1219 SAT1_CF | blue | na |
| chrUn | 4474334 | 4475739 | 1406 SAT1_CF | blue | na |
| chrUn | 4475782 | 4476762 | 981 SAT1_CF  | blue | na |
| chrUn | 4476774 | 4477459 | 686 SAT1_CF  | blue | na |
| chrUn | 4477471 | 4478155 | 685 SAT1_CF  | blue | na |
| chrUn | 4478168 | 4480209 | 2042 SAT1_CF | blue | na |
| chrUn | 4480221 | 4480302 | 82 SAT1_CF   | blue | na |
| chrUn | 4480316 | 4480859 | 544 SAT1_CF  | blue | na |
| chrUn | 4481120 | 4481818 | 699 SAT1_CF  | blue | na |
| chrUn | 4481830 | 4482671 | 842 SAT1_CF  | blue | na |
| chrUn | 4482713 | 4484564 | 1852 SAT1_CF | blue | na |
| chrUn | 4484629 | 4486012 | 1384 SAT1_CF | blue | na |
| chrUn | 4486058 | 4486375 | 318 SAT1_CF  | blue | na |
| chrUn | 4486424 | 4486930 | 507 SAT1_CF  | blue | na |
| chrUn | 4486948 | 4487051 | 104 SAT1_CF  | blue | na |
| chrUn | 4487072 | 4487645 | 574 SAT1_CF  | blue | na |
| chrUn | 4487657 | 4489785 | 2129 SAT1_CF | blue | na |
| chrUn | 4489866 | 4490030 | 165 SAT1_CF  | blue | na |
| chrUn | 4490210 | 4490393 | 184 SAT1_CF  | blue | na |
| chrUn | 4490430 | 4490929 | 500 SAT1_CF  | blue | na |
| chrUn | 4490942 | 4491334 | 393 SAT1_CF  | blue | na |
| chrUn | 4491419 | 4491963 | 545 SAT1_CF  | blue | na |
| chrUn | 4491975 | 4492831 | 857 SAT1_CF  | blue | na |
| chrUn | 4492873 | 4494726 | 1854 SAT1_CF | blue | na |
| chrUn | 4494747 | 4495261 | 515 SAT1_CF  | blue | na |
| chrUn | 4495278 | 4496106 | 829 SAT1_CF  | blue | na |
| chrUn | 4496119 | 4496794 | 676 SAT1_CF  | blue | na |
| chrUn | 4496842 | 4498873 | 2032 SAT1_CF | blue | na |
| chrUn | 4498932 | 4500186 | 1255 SAT1_CF | blue | na |
| chrUn | 4500198 | 4500307 | 110 SAT1_CF  | blue | na |
| chrUn | 4500327 | 4500873 | 547 SAT1_CF  | blue | na |

|       |         |         |              |      |    |
|-------|---------|---------|--------------|------|----|
| chrUn | 4500916 | 4502779 | 1864 SAT1_CF | blue | na |
| chrUn | 4502794 | 4502950 | 157 SAT1_CF  | blue | na |
| chrUn | 4502976 | 4504923 | 1948 SAT1_CF | blue | na |
| chrUn | 4504935 | 4506259 | 1325 SAT1_CF | blue | na |
| chrUn | 4506304 | 4506789 | 486 SAT1_CF  | blue | na |
| chrUn | 4506843 | 4506998 | 156 SAT1_CF  | blue | na |
| chrUn | 4507024 | 4507544 | 521 SAT1_CF  | blue | na |
| chrUn | 4507556 | 4507664 | 109 SAT1_CF  | blue | na |
| chrUn | 4507687 | 4508342 | 656 SAT1_CF  | blue | na |
| chrUn | 4508391 | 4510079 | 1689 SAT1_CF | blue | na |
| chrUn | 4510091 | 4510197 | 107 SAT1_CF  | blue | na |
| chrUn | 4510218 | 4510982 | 765 SAT1_CF  | blue | na |
| chrUn | 4510995 | 4512462 | 1468 SAT1_CF | blue | na |
| chrUn | 4512490 | 4513008 | 519 SAT1_CF  | blue | na |
| chrUn | 4513022 | 4514337 | 1316 SAT1_CF | blue | na |
| chrUn | 4514382 | 4515073 | 692 SAT1_CF  | blue | na |
| chrUn | 4515105 | 4515193 | 89 SAT1_CF   | blue | na |
| chrUn | 4515213 | 4516209 | 997 SAT1_CF  | blue | na |
| chrUn | 4516221 | 4516897 | 677 SAT1_CF  | blue | na |
| chrUn | 4516940 | 4518398 | 1459 SAT1_CF | blue | na |
| chrUn | 4519812 | 4520919 | 1108 SAT1_CF | blue | na |
| chrUn | 4520939 | 4522281 | 1343 SAT1_CF | blue | na |
| chrUn | 4522323 | 4524115 | 1793 SAT1_CF | blue | na |
| chrUn | 4524139 | 4525717 | 1579 SAT1_CF | blue | na |
| chrUn | 4525730 | 4527285 | 1556 SAT1_CF | blue | na |
| chrUn | 4527327 | 4528805 | 1479 SAT1_CF | blue | na |
| chrUn | 4528816 | 4529750 | 935 SAT1_CF  | blue | na |
| chrUn | 4529784 | 4530451 | 668 SAT1_CF  | blue | na |
| chrUn | 4530494 | 4531756 | 1263 SAT1_CF | blue | na |
| chrUn | 4531789 | 4532165 | 377 SAT1_CF  | blue | na |
| chrUn | 4532211 | 4532709 | 499 SAT1_CF  | blue | na |
| chrUn | 4532721 | 4534012 | 1292 SAT1_CF | blue | na |
| chrUn | 4534054 | 4535421 | 1368 SAT1_CF | blue | na |
| chrUn | 4535469 | 4535946 | 478 SAT1_CF  | blue | na |
| chrUn | 4535993 | 4536494 | 502 SAT1_CF  | blue | na |
| chrUn | 4536507 | 4537189 | 683 SAT1_CF  | blue | na |
| chrUn | 4537213 | 4538061 | 849 SAT1_CF  | blue | na |
| chrUn | 4538103 | 4538637 | 535 SAT1_CF  | blue | na |
| chrUn | 4538660 | 4539309 | 650 SAT1_CF  | blue | na |
| chrUn | 4539353 | 4539699 | 347 SAT1_CF  | blue | na |
| chrUn | 4539720 | 4540301 | 582 SAT1_CF  | blue | na |
| chrUn | 4540313 | 4540990 | 678 SAT1_CF  | blue | na |

|       |         |         |              |        |    |
|-------|---------|---------|--------------|--------|----|
| chrUn | 4541033 | 4542459 | 1427 SAT1_CF | blue   | na |
| chrUn | 4542475 | 4543566 | 1092 SAT1_CF | blue   | na |
| chrUn | 4544575 | 4544664 | 90 SAT1_CF   | blue   | na |
| chrUn | 4551042 | 4551587 | 546 SAT1_CF  | blue   | na |
| chrUn | 4551651 | 4552449 | 799 SAT1_CF  | blue   | na |
| chrUn | 4552471 | 4553418 | 948 SAT1_CF  | blue   | na |
| chrUn | 4553435 | 4554472 | 1038 SAT1_CF | blue   | na |
| chrUn | 4554485 | 4555494 | 1010 SAT1_CF | blue   | na |
| chrUn | 4555502 | 4555867 | 366 CarSat1  | red    | na |
| chrUn | 4556017 | 4557047 | 1031 CarSat1 | red    | na |
| chrUn | 4557086 | 4557851 | 766 CarSat1  | red    | na |
| chrUn | 4557870 | 4558396 | 527 CarSat1  | red    | na |
| chrUn | 4558786 | 4558904 | 119 Sat2CF   | purple | na |
| chrUn | 4558803 | 4559970 | 1168 Sat2CF  | purple | na |
| chrUn | 4579049 | 4579211 | 163 Sat2CF   | purple | na |
| chrUn | 4579077 | 4579434 | 358 Sat2CF   | purple | na |
| chrUn | 4579116 | 4579944 | 829 Sat2CF   | purple | na |
| chrUn | 4579049 | 4579211 | 163 Sat2CF   | purple | na |
| chrUn | 4594740 | 4595549 | 810 Sat2CF   | purple | na |
| chrUn | 4594804 | 4595527 | 724 Sat2CF   | purple | na |
| chrUn | 4595418 | 4595586 | 169 Sat2CF   | purple | na |
| chrUn | 4609013 | 4609344 | 332 Sat2CF   | purple | na |
| chrUn | 4609055 | 4609568 | 514 Sat2CF   | purple | na |
| chrUn | 4609440 | 4609616 | 177 Sat2CF   | purple | na |
| chrUn | 4621707 | 4622847 | 1141 Sat2CF  | purple | na |
| chrUn | 4621815 | 4622799 | 985 Sat2CF   | purple | na |
| chrUn | 4633043 | 4633604 | 562 Sat2CF   | purple | na |
| chrUn | 4648995 | 4649815 | 821 Sat2CF   | purple | na |
| chrUn | 4649069 | 4649793 | 725 Sat2CF   | purple | na |
| chrUn | 4649484 | 4649852 | 369 Sat2CF   | purple | na |
| chrUn | 4662607 | 4663858 | 1252 Sat2CF  | purple | na |
| chrUn | 4662737 | 4663822 | 1086 Sat2CF  | purple | na |
| chrUn | 4666448 | 4666588 | 141 CarSat1  | red    | na |
| chrUn | 4666609 | 4668225 | 1617 CarSat1 | red    | na |
| chrUn | 4674796 | 4676007 | 1212 SAT1_CF | blue   | na |
| chrUn | 4676029 | 4676582 | 554 SAT1_CF  | blue   | na |
| chrUn | 4676632 | 4677810 | 1179 SAT1_CF | blue   | na |
| chrUn | 4677846 | 4678168 | 323 SAT1_CF  | blue   | na |
| chrUn | 4678184 | 4680082 | 1899 SAT1_CF | blue   | na |
| chrUn | 4680124 | 4681458 | 1335 SAT1_CF | blue   | na |
| chrUn | 4681479 | 4681626 | 148 SAT1_CF  | blue   | na |
| chrUn | 4681638 | 4682113 | 476 SAT1_CF  | blue   | na |

|       |         |         |              |      |    |
|-------|---------|---------|--------------|------|----|
| chrUn | 4682183 | 4682706 | 524 SAT1_CF  | blue | na |
| chrUn | 4682734 | 4683281 | 548 SAT1_CF  | blue | na |
| chrUn | 4683324 | 4683872 | 549 SAT1_CF  | blue | na |
| chrUn | 4683893 | 4684001 | 109 SAT1_CF  | blue | na |
| chrUn | 4684014 | 4684513 | 500 SAT1_CF  | blue | na |
| chrUn | 4684552 | 4685514 | 963 SAT1_CF  | blue | na |
| chrUn | 4685630 | 4686401 | 772 SAT1_CF  | blue | na |
| chrUn | 4686454 | 4688412 | 1959 SAT1_CF | blue | na |
| chrUn | 4688425 | 4688923 | 499 SAT1_CF  | blue | na |
| chrUn | 4688977 | 4689959 | 983 SAT1_CF  | blue | na |
| chrUn | 4690038 | 4691002 | 965 SAT1_CF  | blue | na |
| chrUn | 4691045 | 4691720 | 676 SAT1_CF  | blue | na |
| chrUn | 4691732 | 4692765 | 1034 SAT1_CF | blue | na |
| chrUn | 4692805 | 4693175 | 371 SAT1_CF  | blue | na |
| chrUn | 4693214 | 4693762 | 549 SAT1_CF  | blue | na |
| chrUn | 4693806 | 4694805 | 1000 SAT1_CF | blue | na |
| chrUn | 4694848 | 4695624 | 777 SAT1_CF  | blue | na |
| chrUn | 4695673 | 4696350 | 678 SAT1_CF  | blue | na |
| chrUn | 4696362 | 4697041 | 680 SAT1_CF  | blue | na |
| chrUn | 4697054 | 4697541 | 488 SAT1_CF  | blue | na |
| chrUn | 4697647 | 4699099 | 1453 SAT1_CF | blue | na |
| chrUn | 4699142 | 4699816 | 675 SAT1_CF  | blue | na |
| chrUn | 4699828 | 4700903 | 1076 SAT1_CF | blue | na |
| chrUn | 4700952 | 4701499 | 548 SAT1_CF  | blue | na |
| chrUn | 4701556 | 4702579 | 1024 SAT1_CF | blue | na |
| chrUn | 4702607 | 4703241 | 635 SAT1_CF  | blue | na |
| chrUn | 4703267 | 4703424 | 158 SAT1_CF  | blue | na |
| chrUn | 4703452 | 4703960 | 509 SAT1_CF  | blue | na |
| chrUn | 4704028 | 4704838 | 811 SAT1_CF  | blue | na |
| chrUn | 4704850 | 4705527 | 678 SAT1_CF  | blue | na |
| chrUn | 4705545 | 4706229 | 685 SAT1_CF  | blue | na |
| chrUn | 4706241 | 4707794 | 1554 SAT1_CF | blue | na |
| chrUn | 4707820 | 4708870 | 1051 SAT1_CF | blue | na |
| chrUn | 4708883 | 4710077 | 1195 SAT1_CF | blue | na |
| chrUn | 4710144 | 4710261 | 118 SAT1_CF  | blue | na |
| chrUn | 4710313 | 4710997 | 685 SAT1_CF  | blue | na |
| chrUn | 4711046 | 4711593 | 548 SAT1_CF  | blue | na |
| chrUn | 4711617 | 4711723 | 107 SAT1_CF  | blue | na |
| chrUn | 4711735 | 4712403 | 669 SAT1_CF  | blue | na |
| chrUn | 4712430 | 4712911 | 482 SAT1_CF  | blue | na |
| chrUn | 4712966 | 4713250 | 285 SAT1_CF  | blue | na |
| chrUn | 4713272 | 4713953 | 682 SAT1_CF  | blue | na |

|       |         |         |              |      |    |
|-------|---------|---------|--------------|------|----|
| chrUn | 4713966 | 4714652 | 687 SAT1_CF  | blue | na |
| chrUn | 4714664 | 4715288 | 625 SAT1_CF  | blue | na |
| chrUn | 4715315 | 4715837 | 523 SAT1_CF  | blue | na |
| chrUn | 4715855 | 4718373 | 2519 SAT1_CF | blue | na |
| chrUn | 4718420 | 4719095 | 676 SAT1_CF  | blue | na |
| chrUn | 4719107 | 4719661 | 555 SAT1_CF  | blue | na |
| chrUn | 4719686 | 4719790 | 105 SAT1_CF  | blue | na |
| chrUn | 4719803 | 4720305 | 503 SAT1_CF  | blue | na |
| chrUn | 4720371 | 4720507 | 137 SAT1_CF  | blue | na |
| chrUn | 4720572 | 4721094 | 523 SAT1_CF  | blue | na |
| chrUn | 4721108 | 4722246 | 1139 SAT1_CF | blue | na |
| chrUn | 4722258 | 4723251 | 994 SAT1_CF  | blue | na |
| chrUn | 4723264 | 4723763 | 500 SAT1_CF  | blue | na |
| chrUn | 4723816 | 4725844 | 2029 SAT1_CF | blue | na |
| chrUn | 4725887 | 4726559 | 673 SAT1_CF  | blue | na |
| chrUn | 4726572 | 4727340 | 769 SAT1_CF  | blue | na |
| chrUn | 4727358 | 4727860 | 503 SAT1_CF  | blue | na |
| chrUn | 4727920 | 4728062 | 143 SAT1_CF  | blue | na |
| chrUn | 4728095 | 4728601 | 507 SAT1_CF  | blue | na |
| chrUn | 4728631 | 4729296 | 666 SAT1_CF  | blue | na |
| chrUn | 4729338 | 4730161 | 824 SAT1_CF  | blue | na |
| chrUn | 4730173 | 4730751 | 579 SAT1_CF  | blue | na |
| chrUn | 4730772 | 4730879 | 108 SAT1_CF  | blue | na |
| chrUn | 4730892 | 4731594 | 703 SAT1_CF  | blue | na |
| chrUn | 4731609 | 4732822 | 1214 SAT1_CF | blue | na |
| chrUn | 4732835 | 4733335 | 501 SAT1_CF  | blue | na |
| chrUn | 4733375 | 4734272 | 898 SAT1_CF  | blue | na |
| chrUn | 4734304 | 4735117 | 814 SAT1_CF  | blue | na |
| chrUn | 4735159 | 4735843 | 685 SAT1_CF  | blue | na |
| chrUn | 4735856 | 4737077 | 1222 SAT1_CF | blue | na |
| chrUn | 4737120 | 4739024 | 1905 SAT1_CF | blue | na |
| chrUn | 4739037 | 4739519 | 483 SAT1_CF  | blue | na |
| chrUn | 4739582 | 4740536 | 955 SAT1_CF  | blue | na |
| chrUn | 4740608 | 4741143 | 536 SAT1_CF  | blue | na |
| chrUn | 4741187 | 4741774 | 588 SAT1_CF  | blue | na |
| chrUn | 4741820 | 4743551 | 1732 SAT1_CF | blue | na |
| chrUn | 4743563 | 4744563 | 1001 SAT1_CF | blue | na |
| chrUn | 4744629 | 4745024 | 396 SAT1_CF  | blue | na |
| chrUn | 4745037 | 4746517 | 1481 SAT1_CF | blue | na |
| chrUn | 4746559 | 4746690 | 132 SAT1_CF  | blue | na |
| chrUn | 4746709 | 4747378 | 670 SAT1_CF  | blue | na |
| chrUn | 4747391 | 4748095 | 705 SAT1_CF  | blue | na |



|       |         |         |              |      |    |
|-------|---------|---------|--------------|------|----|
| chrUn | 4748123 | 4749352 | 1230 SAT1_CF | blue | na |
| chrUn | 4749380 | 4750011 | 632 SAT1_CF  | blue | na |
| chrUn | 4750054 | 4750727 | 674 SAT1_CF  | blue | na |
| chrUn | 4750739 | 4751421 | 683 SAT1_CF  | blue | na |
| chrUn | 4751434 | 4751926 | 493 SAT1_CF  | blue | na |
| chrUn | 4751971 | 4752339 | 369 SAT1_CF  | blue | na |
| chrUn | 4752380 | 4752887 | 508 SAT1_CF  | blue | na |
| chrUn | 4752966 | 4753435 | 470 SAT1_CF  | blue | na |
| chrUn | 4753450 | 4754158 | 709 SAT1_CF  | blue | na |
| chrUn | 4754202 | 4754728 | 527 SAT1_CF  | blue | na |
| chrUn | 4754759 | 4754940 | 182 SAT1_CF  | blue | na |
| chrUn | 4755119 | 4755964 | 846 SAT1_CF  | blue | na |
| chrUn | 4756006 | 4756179 | 174 SAT1_CF  | blue | na |
| chrUn | 4756191 | 4756866 | 676 SAT1_CF  | blue | na |
| chrUn | 4756878 | 4757553 | 676 SAT1_CF  | blue | na |
| chrUn | 4757575 | 4758129 | 555 SAT1_CF  | blue | na |
| chrUn | 4758151 | 4758258 | 108 SAT1_CF  | blue | na |
| chrUn | 4758271 | 4759162 | 892 SAT1_CF  | blue | na |
| chrUn | 4759174 | 4759842 | 669 SAT1_CF  | blue | na |
| chrUn | 4759869 | 4760369 | 501 SAT1_CF  | blue | na |
| chrUn | 4760415 | 4760810 | 396 SAT1_CF  | blue | na |
| chrUn | 4760823 | 4761369 | 547 SAT1_CF  | blue | na |
| chrUn | 4761393 | 4762288 | 896 SAT1_CF  | blue | na |
| chrUn | 4762300 | 4762874 | 575 SAT1_CF  | blue | na |
| chrUn | 4762897 | 4763003 | 107 SAT1_CF  | blue | na |
| chrUn | 4763016 | 4763946 | 931 SAT1_CF  | blue | na |
| chrUn | 4763958 | 4764519 | 562 SAT1_CF  | blue | na |
| chrUn | 4764546 | 4764646 | 101 SAT1_CF  | blue | na |
| chrUn | 4764663 | 4765289 | 627 SAT1_CF  | blue | na |
| chrUn | 4765302 | 4766062 | 761 SAT1_CF  | blue | na |
| chrUn | 4766075 | 4766668 | 594 SAT1_CF  | blue | na |
| chrUn | 4766691 | 4767211 | 521 SAT1_CF  | blue | na |
| chrUn | 4767300 | 4767762 | 463 SAT1_CF  | blue | na |
| chrUn | 4767779 | 4768787 | 1009 SAT1_CF | blue | na |
| chrUn | 4768837 | 4769512 | 676 SAT1_CF  | blue | na |
| chrUn | 4769524 | 4770079 | 556 SAT1_CF  | blue | na |
| chrUn | 4770100 | 4770196 | 97 SAT1_CF   | blue | na |
| chrUn | 4770218 | 4771957 | 1740 SAT1_CF | blue | na |
| chrUn | 4771969 | 4772727 | 759 SAT1_CF  | blue | na |
| chrUn | 4772747 | 4773258 | 512 SAT1_CF  | blue | na |
| chrUn | 4773279 | 4774237 | 959 SAT1_CF  | blue | na |
| chrUn | 4774281 | 4775097 | 817 SAT1_CF  | blue | na |

|       |         |         |              |      |    |
|-------|---------|---------|--------------|------|----|
| chrUn | 4775139 | 4775852 | 714 SAT1_CF  | blue | na |
| chrUn | 4775922 | 4776596 | 675 SAT1_CF  | blue | na |
| chrUn | 4776607 | 4777756 | 1150 SAT1_CF | blue | na |
| chrUn | 4777785 | 4778294 | 510 SAT1_CF  | blue | na |
| chrUn | 4778337 | 4778900 | 564 SAT1_CF  | blue | na |
| chrUn | 4778928 | 4781491 | 2564 SAT1_CF | blue | na |
| chrUn | 4781512 | 4782516 | 1005 SAT1_CF | blue | na |
| chrUn | 4782597 | 4783136 | 540 SAT1_CF  | blue | na |
| chrUn | 4783179 | 4783727 | 549 SAT1_CF  | blue | na |
| chrUn | 4783797 | 4784479 | 683 SAT1_CF  | blue | na |
| chrUn | 4784493 | 4784992 | 500 SAT1_CF  | blue | na |
| chrUn | 4785038 | 4786204 | 1167 SAT1_CF | blue | na |
| chrUn | 4786247 | 4786370 | 124 SAT1_CF  | blue | na |
| chrUn | 4786383 | 4787209 | 827 SAT1_CF  | blue | na |
| chrUn | 4787234 | 4789055 | 1822 SAT1_CF | blue | na |
| chrUn | 4789125 | 4789797 | 673 SAT1_CF  | blue | na |
| chrUn | 4789810 | 4790292 | 483 SAT1_CF  | blue | na |
| chrUn | 4790306 | 4790609 | 304 SAT1_CF  | blue | na |
| chrUn | 4790653 | 4791748 | 1096 SAT1_CF | blue | na |
| chrUn | 4791792 | 4793103 | 1312 SAT1_CF | blue | na |
| chrUn | 4793143 | 4795182 | 2040 SAT1_CF | blue | na |
| chrUn | 4795225 | 4795900 | 676 SAT1_CF  | blue | na |
| chrUn | 4795913 | 4796395 | 483 SAT1_CF  | blue | na |
| chrUn | 4796421 | 4797438 | 1018 SAT1_CF | blue | na |
| chrUn | 4797454 | 4798461 | 1008 SAT1_CF | blue | na |
| chrUn | 4798503 | 4799178 | 676 SAT1_CF  | blue | na |
| chrUn | 4799192 | 4799658 | 467 SAT1_CF  | blue | na |
| chrUn | 4799679 | 4799788 | 110 SAT1_CF  | blue | na |
| chrUn | 4799800 | 4800483 | 684 SAT1_CF  | blue | na |
| chrUn | 4800495 | 4802500 | 2006 SAT1_CF | blue | na |
| chrUn | 4802547 | 4803221 | 675 SAT1_CF  | blue | na |
| chrUn | 4803233 | 4803787 | 555 SAT1_CF  | blue | na |
| chrUn | 4803814 | 4803916 | 103 SAT1_CF  | blue | na |
| chrUn | 4803929 | 4804430 | 502 SAT1_CF  | blue | na |
| chrUn | 4804496 | 4804632 | 137 SAT1_CF  | blue | na |
| chrUn | 4804699 | 4805218 | 520 SAT1_CF  | blue | na |
| chrUn | 4805232 | 4806904 | 1673 SAT1_CF | blue | na |
| chrUn | 4806929 | 4807550 | 622 SAT1_CF  | blue | na |
| chrUn | 4807561 | 4808059 | 499 SAT1_CF  | blue | na |
| chrUn | 4808112 | 4808277 | 166 SAT1_CF  | blue | na |
| chrUn | 4808451 | 4809243 | 793 SAT1_CF  | blue | na |
| chrUn | 4809287 | 4809777 | 491 SAT1_CF  | blue | na |

|       |         |         |              |      |    |
|-------|---------|---------|--------------|------|----|
| chrUn | 4809823 | 4810359 | 537 SAT1_CF  | blue | na |
| chrUn | 4810402 | 4810949 | 548 SAT1_CF  | blue | na |
| chrUn | 4810970 | 4811568 | 599 SAT1_CF  | blue | na |
| chrUn | 4811591 | 4811699 | 109 SAT1_CF  | blue | na |
| chrUn | 4811710 | 4812212 | 503 SAT1_CF  | blue | na |
| chrUn | 4812248 | 4813275 | 1028 SAT1_CF | blue | na |
| chrUn | 4813291 | 4813925 | 635 SAT1_CF  | blue | na |
| chrUn | 4813969 | 4814513 | 545 SAT1_CF  | blue | na |
| chrUn | 4814556 | 4815232 | 677 SAT1_CF  | blue | na |
| chrUn | 4815244 | 4815835 | 592 SAT1_CF  | blue | na |
| chrUn | 4815862 | 4816361 | 500 SAT1_CF  | blue | na |
| chrUn | 4816406 | 4816563 | 158 SAT1_CF  | blue | na |
| chrUn | 4816578 | 4818254 | 1677 SAT1_CF | blue | na |
| chrUn | 4818296 | 4820299 | 2004 SAT1_CF | blue | na |
| chrUn | 4820339 | 4820740 | 402 SAT1_CF  | blue | na |
| chrUn | 4820754 | 4822368 | 1615 SAT1_CF | blue | na |
| chrUn | 4822410 | 4823330 | 921 SAT1_CF  | blue | na |
| chrUn | 4823357 | 4824038 | 682 SAT1_CF  | blue | na |
| chrUn | 4824050 | 4824601 | 552 SAT1_CF  | blue | na |
| chrUn | 4824645 | 4825188 | 544 SAT1_CF  | blue | na |
| chrUn | 4825231 | 4825780 | 550 SAT1_CF  | blue | na |
| chrUn | 4825858 | 4826627 | 770 SAT1_CF  | blue | na |
| chrUn | 4826679 | 4827540 | 862 SAT1_CF  | blue | na |
| chrUn | 4827552 | 4829480 | 1929 SAT1_CF | blue | na |
| chrUn | 4829523 | 4830196 | 674 SAT1_CF  | blue | na |
| chrUn | 4830208 | 4830896 | 689 SAT1_CF  | blue | na |
| chrUn | 4830909 | 4831777 | 869 SAT1_CF  | blue | na |
| chrUn | 4831824 | 4832500 | 677 SAT1_CF  | blue | na |
| chrUn | 4832512 | 4833894 | 1383 SAT1_CF | blue | na |
| chrUn | 4833906 | 4835612 | 1707 SAT1_CF | blue | na |
| chrUn | 4835625 | 4836123 | 499 SAT1_CF  | blue | na |
| chrUn | 4836165 | 4837120 | 956 SAT1_CF  | blue | na |
| chrUn | 4837164 | 4837836 | 673 SAT1_CF  | blue | na |
| chrUn | 4837848 | 4838444 | 597 SAT1_CF  | blue | na |
| chrUn | 4838466 | 4838984 | 519 SAT1_CF  | blue | na |
| chrUn | 4839003 | 4839263 | 261 SAT1_CF  | blue | na |
| chrUn | 4839307 | 4839854 | 548 SAT1_CF  | blue | na |
| chrUn | 4839868 | 4840856 | 989 SAT1_CF  | blue | na |
| chrUn | 4840898 | 4842308 | 1411 SAT1_CF | blue | na |
| chrUn | 4842329 | 4843148 | 820 SAT1_CF  | blue | na |
| chrUn | 4843163 | 4844377 | 1215 SAT1_CF | blue | na |
| chrUn | 4844419 | 4844898 | 480 SAT1_CF  | blue | na |

|       |         |         |              |      |    |
|-------|---------|---------|--------------|------|----|
| chrUn | 4844960 | 4845920 | 961 SAT1_CF  | blue | na |
| chrUn | 4845999 | 4846757 | 759 SAT1_CF  | blue | na |
| chrUn | 4846776 | 4847898 | 1123 SAT1_CF | blue | na |
| chrUn | 4847957 | 4848635 | 679 SAT1_CF  | blue | na |
| chrUn | 4848656 | 4849408 | 753 SAT1_CF  | blue | na |
| chrUn | 4849452 | 4849991 | 540 SAT1_CF  | blue | na |
| chrUn | 4850034 | 4850558 | 525 SAT1_CF  | blue | na |
| chrUn | 4850576 | 4850859 | 284 SAT1_CF  | blue | na |
| chrUn | 4850901 | 4851445 | 545 SAT1_CF  | blue | na |
| chrUn | 4851473 | 4852375 | 903 SAT1_CF  | blue | na |
| chrUn | 4852393 | 4852894 | 502 SAT1_CF  | blue | na |
| chrUn | 4852934 | 4853335 | 402 SAT1_CF  | blue | na |
| chrUn | 4853347 | 4855610 | 2264 SAT1_CF | blue | na |
| chrUn | 4855642 | 4855823 | 182 SAT1_CF  | blue | na |
| chrUn | 4856003 | 4856374 | 372 SAT1_CF  | blue | na |
| chrUn | 4856402 | 4857032 | 631 SAT1_CF  | blue | na |
| chrUn | 4857075 | 4857748 | 674 SAT1_CF  | blue | na |
| chrUn | 4857759 | 4858361 | 603 SAT1_CF  | blue | na |
| chrUn | 4858374 | 4858855 | 482 SAT1_CF  | blue | na |
| chrUn | 4858910 | 4859315 | 406 SAT1_CF  | blue | na |
| chrUn | 4859329 | 4859835 | 507 SAT1_CF  | blue | na |
| chrUn | 4859866 | 4860697 | 832 SAT1_CF  | blue | na |
| chrUn | 4860758 | 4861435 | 678 SAT1_CF  | blue | na |
| chrUn | 4861447 | 4862019 | 573 SAT1_CF  | blue | na |
| chrUn | 4862042 | 4862148 | 107 SAT1_CF  | blue | na |
| chrUn | 4862162 | 4863490 | 1329 SAT1_CF | blue | na |
| chrUn | 4863555 | 4865302 | 1748 SAT1_CF | blue | na |
| chrUn | 4865314 | 4866307 | 994 SAT1_CF  | blue | na |
| chrUn | 4866320 | 4866820 | 501 SAT1_CF  | blue | na |
| chrUn | 4866860 | 4868893 | 2034 SAT1_CF | blue | na |
| chrUn | 4868936 | 4869613 | 678 SAT1_CF  | blue | na |
| chrUn | 4869625 | 4870098 | 474 SAT1_CF  | blue | na |
| chrUn | 4870168 | 4870840 | 673 SAT1_CF  | blue | na |
| chrUn | 4870853 | 4871335 | 483 SAT1_CF  | blue | na |
| chrUn | 4871394 | 4872292 | 899 SAT1_CF  | blue | na |
| chrUn | 4872359 | 4873011 | 653 SAT1_CF  | blue | na |
| chrUn | 4873033 | 4873577 | 545 SAT1_CF  | blue | na |
| chrUn | 4873620 | 4874714 | 1095 SAT1_CF | blue | na |
| chrUn | 4874737 | 4874843 | 107 SAT1_CF  | blue | na |
| chrUn | 4874856 | 4875356 | 501 SAT1_CF  | blue | na |
| chrUn | 4875402 | 4876354 | 953 SAT1_CF  | blue | na |
| chrUn | 4876389 | 4876961 | 573 SAT1_CF  | blue | na |

|       |         |         |              |      |    |
|-------|---------|---------|--------------|------|----|
| chrUn | 4877005 | 4877784 | 780 SAT1_CF  | blue | na |
| chrUn | 4877826 | 4878668 | 843 SAT1_CF  | blue | na |
| chrUn | 4878680 | 4879361 | 682 SAT1_CF  | blue | na |
| chrUn | 4879374 | 4880532 | 1159 SAT1_CF | blue | na |
| chrUn | 4880602 | 4881146 | 545 SAT1_CF  | blue | na |
| chrUn | 4881204 | 4881961 | 758 SAT1_CF  | blue | na |
| chrUn | 4881982 | 4882304 | 323 SAT1_CF  | blue | na |
| chrUn | 4882379 | 4883038 | 660 SAT1_CF  | blue | na |
| chrUn | 4883065 | 4883567 | 503 SAT1_CF  | blue | na |
| chrUn | 4883653 | 4884847 | 1195 SAT1_CF | blue | na |
| chrUn | 4884858 | 4885334 | 477 SAT1_CF  | blue | na |
| chrUn | 4885394 | 4885793 | 400 SAT1_CF  | blue | na |
| chrUn | 4885805 | 4887251 | 1447 SAT1_CF | blue | na |
| chrUn | 4887293 | 4888154 | 862 SAT1_CF  | blue | na |
| chrUn | 4888167 | 4888927 | 761 SAT1_CF  | blue | na |
| chrUn | 4888940 | 4889442 | 503 SAT1_CF  | blue | na |
| chrUn | 4889482 | 4890571 | 1090 SAT1_CF | blue | na |
| chrUn | 4890583 | 4891254 | 672 SAT1_CF  | blue | na |
| chrUn | 4891265 | 4891766 | 502 SAT1_CF  | blue | na |
| chrUn | 4891806 | 4893370 | 1565 SAT1_CF | blue | na |
| chrUn | 4893395 | 4893479 | 85 SAT1_CF   | blue | na |
| chrUn | 4893523 | 4894066 | 544 SAT1_CF  | blue | na |
| chrUn | 4894109 | 4894786 | 678 SAT1_CF  | blue | na |
| chrUn | 4894798 | 4895389 | 592 SAT1_CF  | blue | na |
| chrUn | 4895416 | 4895916 | 501 SAT1_CF  | blue | na |
| chrUn | 4895929 | 4897422 | 1494 SAT1_CF | blue | na |
| chrUn | 4897469 | 4897626 | 158 SAT1_CF  | blue | na |
| chrUn | 4897654 | 4898166 | 513 SAT1_CF  | blue | na |
| chrUn | 4898246 | 4899282 | 1037 SAT1_CF | blue | na |
| chrUn | 4899325 | 4899915 | 591 SAT1_CF  | blue | na |
| chrUn | 4899927 | 4900604 | 678 SAT1_CF  | blue | na |
| chrUn | 4900616 | 4901170 | 555 SAT1_CF  | blue | na |
| chrUn | 4901195 | 4901299 | 105 SAT1_CF  | blue | na |
| chrUn | 4901312 | 4902526 | 1215 SAT1_CF | blue | na |
| chrUn | 4902540 | 4903677 | 1138 SAT1_CF | blue | na |
| chrUn | 4903689 | 4904680 | 992 SAT1_CF  | blue | na |
| chrUn | 4904693 | 4905194 | 502 SAT1_CF  | blue | na |
| chrUn | 4905234 | 4906255 | 1022 SAT1_CF | blue | na |
| chrUn | 4906310 | 4907274 | 965 SAT1_CF  | blue | na |
| chrUn | 4907318 | 4908138 | 821 SAT1_CF  | blue | na |
| chrUn | 4908188 | 4909809 | 1622 SAT1_CF | blue | na |
| chrUn | 4909871 | 4910455 | 585 SAT1_CF  | blue | na |

|       |         |         |              |      |    |
|-------|---------|---------|--------------|------|----|
| chrUn | 4910490 | 4910671 | 182 SAT1_CF  | blue | na |
| chrUn | 4910855 | 4911090 | 236 SAT1_CF  | blue | na |
| chrUn | 4911102 | 4911649 | 548 SAT1_CF  | blue | na |
| chrUn | 4911728 | 4912849 | 1122 SAT1_CF | blue | na |
| chrUn | 4912862 | 4913338 | 477 SAT1_CF  | blue | na |
| chrUn | 4913408 | 4914081 | 674 SAT1_CF  | blue | na |
| chrUn | 4914093 | 4915091 | 999 SAT1_CF  | blue | na |
| chrUn | 4915152 | 4915553 | 402 SAT1_CF  | blue | na |
| chrUn | 4915566 | 4917884 | 2319 SAT1_CF | blue | na |
| chrUn | 4917897 | 4918399 | 503 SAT1_CF  | blue | na |
| chrUn | 4918487 | 4919434 | 948 SAT1_CF  | blue | na |
| chrUn | 4919512 | 4920475 | 964 SAT1_CF  | blue | na |
| chrUn | 4920518 | 4921194 | 677 SAT1_CF  | blue | na |
| chrUn | 4921206 | 4921889 | 684 SAT1_CF  | blue | na |
| chrUn | 4921902 | 4922404 | 503 SAT1_CF  | blue | na |
| chrUn | 4922444 | 4922846 | 403 SAT1_CF  | blue | na |
| chrUn | 4922859 | 4923403 | 545 SAT1_CF  | blue | na |
| chrUn | 4923431 | 4924060 | 630 SAT1_CF  | blue | na |
| chrUn | 4924105 | 4924778 | 674 SAT1_CF  | blue | na |
| chrUn | 4924792 | 4925289 | 498 SAT1_CF  | blue | na |
| chrUn | 4925329 | 4927183 | 1855 SAT1_CF | blue | na |
| chrUn | 4927224 | 4928616 | 1393 SAT1_CF | blue | na |
| chrUn | 4928668 | 4930273 | 1606 SAT1_CF | blue | na |
| chrUn | 4930349 | 4933154 | 2806 SAT1_CF | blue | na |
| chrUn | 4933167 | 4933671 | 505 SAT1_CF  | blue | na |
| chrUn | 4933719 | 4934037 | 319 SAT1_CF  | blue | na |
| chrUn | 4934049 | 4936860 | 2812 SAT1_CF | blue | na |
| chrUn | 4936883 | 4936989 | 107 SAT1_CF  | blue | na |
| chrUn | 4937002 | 4937499 | 498 SAT1_CF  | blue | na |
| chrUn | 4937567 | 4937703 | 137 SAT1_CF  | blue | na |
| chrUn | 4937731 | 4938922 | 1192 SAT1_CF | blue | na |
| chrUn | 4938960 | 4940913 | 1954 SAT1_CF | blue | na |
| chrUn | 4940936 | 4941042 | 107 SAT1_CF  | blue | na |
| chrUn | 4941055 | 4941557 | 503 SAT1_CF  | blue | na |
| chrUn | 4941602 | 4941757 | 156 SAT1_CF  | blue | na |
| chrUn | 4941821 | 4943156 | 1336 SAT1_CF | blue | na |
| chrUn | 4943186 | 4943687 | 502 SAT1_CF  | blue | na |
| chrUn | 4943732 | 4943889 | 158 SAT1_CF  | blue | na |
| chrUn | 4943917 | 4944489 | 573 SAT1_CF  | blue | na |
| chrUn | 4944533 | 4945120 | 588 SAT1_CF  | blue | na |
| chrUn | 4945166 | 4946021 | 856 SAT1_CF  | blue | na |
| chrUn | 4946034 | 4946536 | 503 SAT1_CF  | blue | na |

|       |         |         |              |      |    |
|-------|---------|---------|--------------|------|----|
| chrUn | 4946550 | 4946866 | 317 SAT1_CF  | blue | na |
| chrUn | 4946878 | 4947958 | 1081 SAT1_CF | blue | na |
| chrUn | 4947986 | 4948617 | 632 SAT1_CF  | blue | na |
| chrUn | 4948660 | 4949335 | 676 SAT1_CF  | blue | na |
| chrUn | 4949348 | 4949812 | 465 SAT1_CF  | blue | na |
| chrUn | 4949857 | 4950876 | 1020 SAT1_CF | blue | na |
| chrUn | 4950892 | 4951894 | 1003 SAT1_CF | blue | na |
| chrUn | 4951941 | 4952613 | 673 SAT1_CF  | blue | na |
| chrUn | 4952625 | 4953179 | 555 SAT1_CF  | blue | na |
| chrUn | 4953204 | 4953308 | 105 SAT1_CF  | blue | na |
| chrUn | 4953321 | 4953822 | 502 SAT1_CF  | blue | na |
| chrUn | 4953888 | 4954024 | 137 SAT1_CF  | blue | na |
| chrUn | 4954089 | 4954612 | 524 SAT1_CF  | blue | na |
| chrUn | 4954626 | 4956452 | 1827 SAT1_CF | blue | na |
| chrUn | 4956479 | 4956978 | 500 SAT1_CF  | blue | na |
| chrUn | 4957023 | 4957180 | 158 SAT1_CF  | blue | na |
| chrUn | 4957213 | 4958503 | 1291 SAT1_CF | blue | na |
| chrUn | 4958527 | 4959615 | 1089 SAT1_CF | blue | na |
| chrUn | 4959627 | 4960101 | 475 SAT1_CF  | blue | na |
| chrUn | 4960123 | 4960230 | 108 SAT1_CF  | blue | na |
| chrUn | 4960243 | 4960744 | 502 SAT1_CF  | blue | na |
| chrUn | 4960784 | 4961227 | 444 SAT1_CF  | blue | na |
| chrUn | 4961270 | 4961819 | 550 SAT1_CF  | blue | na |
| chrUn | 4961896 | 4962743 | 848 SAT1_CF  | blue | na |
| chrUn | 4962767 | 4963446 | 680 SAT1_CF  | blue | na |
| chrUn | 4963460 | 4964359 | 900 SAT1_CF  | blue | na |
| chrUn | 4964386 | 4964925 | 540 SAT1_CF  | blue | na |
| chrUn | 4964992 | 4965482 | 491 SAT1_CF  | blue | na |
| chrUn | 4965493 | 4967025 | 1533 SAT1_CF | blue | na |
| chrUn | 4967048 | 4967842 | 795 SAT1_CF  | blue | na |
| chrUn | 4967885 | 4968501 | 617 SAT1_CF  | blue | na |
| chrUn | 4968515 | 4969332 | 818 SAT1_CF  | blue | na |
| chrUn | 4969374 | 4970234 | 861 SAT1_CF  | blue | na |
| chrUn | 4970246 | 4970800 | 555 SAT1_CF  | blue | na |
| chrUn | 4970821 | 4970923 | 103 SAT1_CF  | blue | na |
| chrUn | 4970941 | 4971871 | 931 SAT1_CF  | blue | na |
| chrUn | 4971913 | 4972849 | 937 SAT1_CF  | blue | na |
| chrUn | 4972867 | 4974663 | 1797 SAT1_CF | blue | na |
| chrUn | 4974681 | 4975276 | 596 SAT1_CF  | blue | na |
| chrUn | 4975298 | 4975819 | 522 SAT1_CF  | blue | na |
| chrUn | 4975840 | 4976242 | 403 SAT1_CF  | blue | na |
| chrUn | 4976255 | 4976775 | 521 SAT1_CF  | blue | na |

|       |         |         |              |      |    |
|-------|---------|---------|--------------|------|----|
| chrUn | 4976793 | 4977220 | 428 SAT1_CF  | blue | na |
| chrUn | 4977264 | 4977909 | 646 SAT1_CF  | blue | na |
| chrUn | 4977921 | 4978595 | 675 SAT1_CF  | blue | na |
| chrUn | 4978609 | 4980200 | 1592 SAT1_CF | blue | na |
| chrUn | 4980242 | 4980360 | 119 SAT1_CF  | blue | na |
| chrUn | 4980407 | 4982391 | 1985 SAT1_CF | blue | na |
| chrUn | 4982434 | 4982977 | 544 SAT1_CF  | blue | na |
| chrUn | 4983020 | 4984462 | 1443 SAT1_CF | blue | na |
| chrUn | 4984504 | 4985364 | 861 SAT1_CF  | blue | na |
| chrUn | 4985376 | 4985935 | 560 SAT1_CF  | blue | na |
| chrUn | 4985957 | 4986064 | 108 SAT1_CF  | blue | na |
| chrUn | 4986077 | 4986945 | 869 SAT1_CF  | blue | na |
| chrUn | 4986992 | 4987727 | 736 SAT1_CF  | blue | na |
| chrUn | 4987754 | 4988432 | 679 SAT1_CF  | blue | na |
| chrUn | 4988450 | 4989149 | 700 SAT1_CF  | blue | na |
| chrUn | 4989162 | 4989707 | 546 SAT1_CF  | blue | na |
| chrUn | 4989751 | 4990181 | 431 SAT1_CF  | blue | na |
| chrUn | 4990218 | 4991700 | 1483 SAT1_CF | blue | na |
| chrUn | 4991718 | 4992220 | 503 SAT1_CF  | blue | na |
| chrUn | 4992256 | 4993098 | 843 SAT1_CF  | blue | na |
| chrUn | 4993143 | 4993299 | 157 SAT1_CF  | blue | na |
| chrUn | 4993364 | 4993928 | 565 SAT1_CF  | blue | na |
| chrUn | 4993974 | 4994608 | 635 SAT1_CF  | blue | na |
| chrUn | 4994620 | 4995256 | 637 SAT1_CF  | blue | na |
| chrUn | 4995268 | 4995846 | 579 SAT1_CF  | blue | na |
| chrUn | 4995867 | 4995974 | 108 SAT1_CF  | blue | na |
| chrUn | 4995987 | 4996506 | 520 SAT1_CF  | blue | na |
| chrUn | 4996545 | 4996875 | 331 SAT1_CF  | blue | na |
| chrUn | 4996889 | 4997968 | 1080 SAT1_CF | blue | na |
| chrUn | 4998027 | 4998656 | 630 SAT1_CF  | blue | na |
| chrUn | 4998699 | 4999243 | 545 SAT1_CF  | blue | na |
| chrUn | 4999300 | 4999965 | 666 SAT1_CF  | blue | na |
| chrUn | 4999978 | 5000480 | 503 SAT1_CF  | blue | na |
| chrUn | 5000520 | 5000922 | 403 SAT1_CF  | blue | na |
| chrUn | 5000933 | 5001455 | 523 SAT1_CF  | blue | na |
| chrUn | 5001473 | 5001901 | 429 SAT1_CF  | blue | na |
| chrUn | 5001945 | 5003675 | 1731 SAT1_CF | blue | na |
| chrUn | 5003745 | 5004427 | 683 SAT1_CF  | blue | na |
| chrUn | 5004440 | 5004939 | 500 SAT1_CF  | blue | na |
| chrUn | 5004985 | 5006544 | 1560 SAT1_CF | blue | na |
| chrUn | 5006588 | 5007209 | 622 SAT1_CF  | blue | na |
| chrUn | 5007222 | 5008602 | 1381 SAT1_CF | blue | na |



|       |         |         |              |      |    |
|-------|---------|---------|--------------|------|----|
| chrUn | 5008645 | 5009098 | 454 SAT1_CF  | blue | na |
| chrUn | 5009168 | 5009712 | 545 SAT1_CF  | blue | na |
| chrUn | 5009769 | 5010421 | 653 SAT1_CF  | blue | na |
| chrUn | 5010448 | 5011149 | 702 SAT1_CF  | blue | na |
| chrUn | 5011177 | 5011688 | 512 SAT1_CF  | blue | na |
| chrUn | 5011731 | 5012954 | 1224 SAT1_CF | blue | na |
| chrUn | 5012966 | 5013597 | 632 SAT1_CF  | blue | na |
| chrUn | 5013627 | 5013794 | 168 SAT1_CF  | blue | na |
| chrUn | 5014054 | 5015872 | 1819 SAT1_CF | blue | na |
| chrUn | 5015884 | 5016568 | 685 SAT1_CF  | blue | na |
| chrUn | 5016581 | 5017709 | 1129 SAT1_CF | blue | na |
| chrUn | 5017722 | 5018204 | 483 SAT1_CF  | blue | na |
| chrUn | 5018263 | 5019224 | 962 SAT1_CF  | blue | na |
| chrUn | 5019268 | 5020242 | 975 SAT1_CF  | blue | na |
| chrUn | 5020291 | 5020968 | 678 SAT1_CF  | blue | na |
| chrUn | 5020980 | 5021661 | 682 SAT1_CF  | blue | na |
| chrUn | 5021674 | 5022175 | 502 SAT1_CF  | blue | na |
| chrUn | 5022262 | 5022767 | 506 SAT1_CF  | blue | na |
| chrUn | 5022807 | 5023352 | 546 SAT1_CF  | blue | na |
| chrUn | 5023379 | 5024326 | 948 SAT1_CF  | blue | na |
| chrUn | 5024370 | 5024730 | 361 SAT1_CF  | blue | na |
| chrUn | 5024755 | 5026088 | 1334 SAT1_CF | blue | na |
| chrUn | 5026100 | 5026782 | 683 SAT1_CF  | blue | na |
| chrUn | 5026795 | 5029012 | 2218 SAT1_CF | blue | na |
| chrUn | 5029024 | 5029596 | 573 SAT1_CF  | blue | na |
| chrUn | 5029619 | 5029725 | 107 SAT1_CF  | blue | na |
| chrUn | 5029739 | 5030835 | 1097 SAT1_CF | blue | na |
| chrUn | 5030908 | 5032945 | 2038 SAT1_CF | blue | na |
| chrUn | 5032988 | 5033661 | 674 SAT1_CF  | blue | na |
| chrUn | 5033673 | 5034155 | 483 SAT1_CF  | blue | na |
| chrUn | 5034175 | 5034329 | 155 SAT1_CF  | blue | na |
| chrUn | 5034390 | 5035067 | 678 SAT1_CF  | blue | na |
| chrUn | 5035079 | 5035844 | 766 SAT1_CF  | blue | na |
| chrUn | 5035858 | 5036530 | 673 SAT1_CF  | blue | na |
| chrUn | 5036552 | 5037095 | 544 SAT1_CF  | blue | na |
| chrUn | 5037140 | 5037683 | 544 SAT1_CF  | blue | na |
| chrUn | 5037740 | 5038276 | 537 SAT1_CF  | blue | na |
| chrUn | 5038299 | 5038405 | 107 SAT1_CF  | blue | na |
| chrUn | 5038418 | 5038517 | 100 SAT1_CF  | blue | na |
| chrUn | 5038529 | 5039082 | 554 SAT1_CF  | blue | na |
| chrUn | 5039105 | 5039211 | 107 SAT1_CF  | blue | na |
| chrUn | 5039224 | 5039724 | 501 SAT1_CF  | blue | na |

|       |         |         |              |      |    |
|-------|---------|---------|--------------|------|----|
| chrUn | 5039760 | 5039945 | 186 SAT1_CF  | blue | na |
| chrUn | 5040126 | 5040290 | 165 SAT1_CF  | blue | na |
| chrUn | 5040371 | 5040919 | 549 SAT1_CF  | blue | na |
| chrUn | 5041014 | 5042166 | 1153 SAT1_CF | blue | na |
| chrUn | 5042208 | 5042787 | 580 SAT1_CF  | blue | na |
| chrUn | 5042808 | 5042907 | 100 SAT1_CF  | blue | na |
| chrUn | 5042929 | 5043472 | 544 SAT1_CF  | blue | na |
| chrUn | 5043515 | 5044700 | 1186 SAT1_CF | blue | na |
| chrUn | 5044719 | 5045217 | 499 SAT1_CF  | blue | na |
| chrUn | 5045303 | 5047285 | 1983 SAT1_CF | blue | na |
| chrUn | 5047328 | 5048004 | 677 SAT1_CF  | blue | na |
| chrUn | 5048016 | 5048697 | 682 SAT1_CF  | blue | na |
| chrUn | 5048710 | 5049210 | 501 SAT1_CF  | blue | na |
| chrUn | 5049246 | 5051785 | 2540 SAT1_CF | blue | na |
| chrUn | 5051797 | 5052550 | 754 SAT1_CF  | blue | na |
| chrUn | 5052572 | 5053093 | 522 SAT1_CF  | blue | na |
| chrUn | 5053160 | 5054310 | 1151 SAT1_CF | blue | na |
| chrUn | 5054323 | 5054843 | 521 SAT1_CF  | blue | na |
| chrUn | 5054869 | 5055025 | 157 SAT1_CF  | blue | na |
| chrUn | 5055087 | 5055634 | 548 SAT1_CF  | blue | na |
| chrUn | 5055676 | 5056428 | 753 SAT1_CF  | blue | na |
| chrUn | 5056450 | 5056971 | 522 SAT1_CF  | blue | na |
| chrUn | 5056992 | 5057394 | 403 SAT1_CF  | blue | na |
| chrUn | 5057431 | 5057693 | 263 SAT1_CF  | blue | na |
| chrUn | 5057736 | 5058299 | 564 SAT1_CF  | blue | na |
| chrUn | 5058343 | 5059676 | 1334 SAT1_CF | blue | na |
| chrUn | 5059689 | 5060241 | 553 SAT1_CF  | blue | na |
| chrUn | 5060264 | 5060370 | 107 SAT1_CF  | blue | na |
| chrUn | 5060383 | 5061245 | 863 SAT1_CF  | blue | na |
| chrUn | 5061257 | 5061865 | 609 SAT1_CF  | blue | na |
| chrUn | 5061878 | 5062534 | 657 SAT1_CF  | blue | na |
| chrUn | 5062568 | 5063073 | 506 SAT1_CF  | blue | na |
| chrUn | 5063116 | 5064945 | 1830 SAT1_CF | blue | na |
| chrUn | 5064957 | 5065431 | 475 SAT1_CF  | blue | na |
| chrUn | 5065453 | 5065560 | 108 SAT1_CF  | blue | na |
| chrUn | 5065573 | 5066074 | 502 SAT1_CF  | blue | na |
| chrUn | 5066114 | 5066557 | 444 SAT1_CF  | blue | na |
| chrUn | 5066600 | 5067274 | 675 SAT1_CF  | blue | na |
| chrUn | 5067292 | 5067845 | 554 SAT1_CF  | blue | na |
| chrUn | 5067866 | 5067975 | 110 SAT1_CF  | blue | na |
| chrUn | 5067987 | 5068488 | 502 SAT1_CF  | blue | na |
| chrUn | 5068533 | 5068688 | 156 SAT1_CF  | blue | na |

|       |         |         |              |      |    |
|-------|---------|---------|--------------|------|----|
| chrUn | 5068704 | 5069903 | 1200 SAT1_CF | blue | na |
| chrUn | 5069947 | 5071970 | 2024 SAT1_CF | blue | na |
| chrUn | 5071984 | 5072504 | 521 SAT1_CF  | blue | na |
| chrUn | 5072530 | 5074099 | 1570 SAT1_CF | blue | na |
| chrUn | 5074112 | 5074615 | 504 SAT1_CF  | blue | na |
| chrUn | 5074655 | 5075616 | 962 SAT1_CF  | blue | na |
| chrUn | 5075675 | 5076475 | 801 SAT1_CF  | blue | na |
| chrUn | 5076517 | 5076997 | 481 SAT1_CF  | blue | na |
| chrUn | 5077056 | 5077967 | 912 SAT1_CF  | blue | na |
| chrUn | 5077994 | 5078548 | 555 SAT1_CF  | blue | na |
| chrUn | 5078588 | 5079512 | 925 SAT1_CF  | blue | na |
| chrUn | 5079530 | 5081445 | 1916 SAT1_CF | blue | na |
| chrUn | 5081516 | 5082150 | 635 SAT1_CF  | blue | na |
| chrUn | 5082163 | 5082879 | 717 SAT1_CF  | blue | na |
| chrUn | 5082894 | 5083695 | 802 SAT1_CF  | blue | na |
| chrUn | 5083738 | 5086087 | 2350 SAT1_CF | blue | na |
| chrUn | 5086099 | 5086651 | 553 SAT1_CF  | blue | na |
| chrUn | 5086672 | 5086774 | 103 SAT1_CF  | blue | na |
| chrUn | 5086792 | 5087345 | 554 SAT1_CF  | blue | na |
| chrUn | 5087486 | 5089401 | 1916 SAT1_CF | blue | na |
| chrUn | 5089419 | 5090322 | 904 SAT1_CF  | blue | na |
| chrUn | 5090364 | 5090536 | 173 SAT1_CF  | blue | na |
| chrUn | 5090548 | 5091222 | 675 SAT1_CF  | blue | na |
| chrUn | 5091236 | 5092718 | 1483 SAT1_CF | blue | na |
| chrUn | 5092768 | 5093730 | 963 SAT1_CF  | blue | na |
| chrUn | 5093743 | 5094265 | 523 SAT1_CF  | blue | na |
| chrUn | 5094297 | 5094805 | 509 SAT1_CF  | blue | na |
| chrUn | 5094885 | 5095921 | 1037 SAT1_CF | blue | na |
| chrUn | 5095963 | 5096594 | 632 SAT1_CF  | blue | na |
| chrUn | 5096617 | 5096723 | 107 SAT1_CF  | blue | na |
| chrUn | 5096736 | 5097937 | 1202 SAT1_CF | blue | na |
| chrUn | 5097968 | 5098439 | 472 SAT1_CF  | blue | na |
| chrUn | 5098475 | 5098659 | 185 SAT1_CF  | blue | na |
| chrUn | 5098841 | 5099043 | 203 SAT1_CF  | blue | na |
| chrUn | 5099086 | 5099724 | 639 SAT1_CF  | blue | na |
| chrUn | 5099737 | 5100239 | 503 SAT1_CF  | blue | na |
| chrUn | 5100305 | 5100440 | 136 SAT1_CF  | blue | na |
| chrUn | 5100455 | 5102776 | 2322 SAT1_CF | blue | na |
| chrUn | 5102794 | 5103296 | 503 SAT1_CF  | blue | na |
| chrUn | 5103336 | 5104265 | 930 SAT1_CF  | blue | na |
| chrUn | 5104299 | 5104817 | 519 SAT1_CF  | blue | na |
| chrUn | 5104830 | 5105367 | 538 SAT1_CF  | blue | na |

|       |         |         |              |      |    |
|-------|---------|---------|--------------|------|----|
| chrUn | 5105410 | 5106086 | 677 SAT1_CF  | blue | na |
| chrUn | 5106098 | 5106652 | 555 SAT1_CF  | blue | na |
| chrUn | 5106674 | 5106779 | 106 SAT1_CF  | blue | na |
| chrUn | 5106792 | 5107291 | 500 SAT1_CF  | blue | na |
| chrUn | 5107327 | 5108340 | 1014 SAT1_CF | blue | na |
| chrUn | 5108444 | 5109118 | 675 SAT1_CF  | blue | na |
| chrUn | 5109139 | 5109613 | 475 SAT1_CF  | blue | na |
| chrUn | 5109646 | 5109962 | 317 SAT1_CF  | blue | na |
| chrUn | 5109974 | 5110521 | 548 SAT1_CF  | blue | na |
| chrUn | 5110544 | 5110650 | 107 SAT1_CF  | blue | na |
| chrUn | 5110670 | 5111226 | 557 SAT1_CF  | blue | na |
| chrUn | 5112864 | 5113768 | 905 SAT1_CF  | blue | na |
| chrUn | 5113802 | 5114797 | 996 SAT1_CF  | blue | na |
| chrUn | 5114841 | 5116176 | 1336 SAT1_CF | blue | na |
| chrUn | 5116188 | 5116708 | 521 SAT1_CF  | blue | na |
| chrUn | 5116753 | 5116888 | 136 SAT1_CF  | blue | na |
| chrUn | 5116903 | 5118173 | 1271 SAT1_CF | blue | na |
| chrUn | 5118196 | 5118301 | 106 SAT1_CF  | blue | na |
| chrUn | 5118314 | 5118843 | 530 SAT1_CF  | blue | na |
| chrUn | 5118883 | 5119064 | 182 SAT1_CF  | blue | na |
| chrUn | 5119246 | 5120358 | 1113 SAT1_CF | blue | na |
| chrUn | 5120396 | 5120940 | 545 SAT1_CF  | blue | na |
| chrUn | 5120981 | 5121841 | 861 SAT1_CF  | blue | na |
| chrUn | 5121855 | 5122862 | 1008 SAT1_CF | blue | na |
| chrUn | 5122911 | 5123455 | 545 SAT1_CF  | blue | na |
| chrUn | 5123476 | 5123585 | 110 SAT1_CF  | blue | na |
| chrUn | 5123597 | 5124225 | 629 SAT1_CF  | blue | na |
| chrUn | 5124285 | 5124806 | 522 SAT1_CF  | blue | na |
| chrUn | 5124849 | 5125887 | 1039 SAT1_CF | blue | na |
| chrUn | 5125929 | 5126720 | 792 SAT1_CF  | blue | na |
| chrUn | 5126743 | 5126849 | 107 SAT1_CF  | blue | na |
| chrUn | 5126862 | 5127382 | 521 SAT1_CF  | blue | na |
| chrUn | 5127408 | 5127547 | 140 SAT1_CF  | blue | na |
| chrUn | 5127593 | 5128101 | 509 SAT1_CF  | blue | na |
| chrUn | 5128119 | 5128778 | 660 SAT1_CF  | blue | na |
| chrUn | 5128822 | 5130152 | 1331 SAT1_CF | blue | na |
| chrUn | 5130166 | 5130925 | 760 SAT1_CF  | blue | na |
| chrUn | 5130937 | 5131618 | 682 SAT1_CF  | blue | na |
| chrUn | 5131631 | 5132131 | 501 SAT1_CF  | blue | na |
| chrUn | 5132171 | 5133315 | 1145 SAT1_CF | blue | na |
| chrUn | 5133329 | 5134029 | 701 SAT1_CF  | blue | na |
| chrUn | 5134071 | 5134930 | 860 SAT1_CF  | blue | na |

|       |         |         |              |      |    |
|-------|---------|---------|--------------|------|----|
| chrUn | 5134942 | 5135609 | 668 SAT1_CF  | blue | na |
| chrUn | 5135636 | 5136138 | 503 SAT1_CF  | blue | na |
| chrUn | 5136191 | 5136510 | 320 SAT1_CF  | blue | na |
| chrUn | 5136593 | 5139156 | 2564 SAT1_CF | blue | na |
| chrUn | 5139170 | 5139690 | 521 SAT1_CF  | blue | na |
| chrUn | 5139759 | 5140070 | 312 SAT1_CF  | blue | na |
| chrUn | 5140084 | 5140940 | 857 SAT1_CF  | blue | na |
| chrUn | 5140987 | 5141529 | 543 SAT1_CF  | blue | na |
| chrUn | 5141571 | 5142429 | 859 SAT1_CF  | blue | na |
| chrUn | 5142441 | 5143087 | 647 SAT1_CF  | blue | na |
| chrUn | 5143100 | 5143862 | 763 SAT1_CF  | blue | na |
| chrUn | 5143874 | 5144374 | 501 SAT1_CF  | blue | na |
| chrUn | 5144414 | 5145592 | 1179 SAT1_CF | blue | na |
| chrUn | 5145658 | 5146325 | 668 SAT1_CF  | blue | na |
| chrUn | 5146367 | 5146714 | 348 SAT1_CF  | blue | na |
| chrUn | 5146752 | 5147296 | 545 SAT1_CF  | blue | na |
| chrUn | 5147346 | 5148692 | 1347 SAT1_CF | blue | na |
| chrUn | 5148704 | 5149386 | 683 SAT1_CF  | blue | na |
| chrUn | 5149399 | 5149900 | 502 SAT1_CF  | blue | na |
| chrUn | 5149940 | 5150342 | 403 SAT1_CF  | blue | na |
| chrUn | 5150356 | 5150901 | 546 SAT1_CF  | blue | na |
| chrUn | 5150944 | 5151626 | 683 SAT1_CF  | blue | na |
| chrUn | 5151639 | 5152121 | 483 SAT1_CF  | blue | na |
| chrUn | 5152227 | 5152581 | 355 SAT1_CF  | blue | na |
| chrUn | 5152592 | 5154024 | 1433 SAT1_CF | blue | na |
| chrUn | 5154077 | 5154804 | 728 SAT1_CF  | blue | na |
| chrUn | 5154821 | 5154934 | 114 SAT1_CF  | blue | na |
| chrUn | 5154946 | 5155792 | 847 SAT1_CF  | blue | na |
| chrUn | 5155823 | 5156372 | 550 SAT1_CF  | blue | na |
| chrUn | 5156451 | 5156776 | 326 SAT1_CF  | blue | na |
| chrUn | 5156801 | 5157447 | 647 SAT1_CF  | blue | na |
| chrUn | 5157459 | 5158134 | 676 SAT1_CF  | blue | na |
| chrUn | 5158146 | 5158627 | 482 SAT1_CF  | blue | na |
| chrUn | 5158687 | 5159085 | 399 SAT1_CF  | blue | na |
| chrUn | 5159097 | 5160285 | 1189 SAT1_CF | blue | na |
| chrUn | 5160316 | 5160836 | 521 SAT1_CF  | blue | na |
| chrUn | 5160953 | 5161955 | 1003 SAT1_CF | blue | na |
| chrUn | 5161981 | 5162917 | 937 SAT1_CF  | blue | na |
| chrUn | 5162966 | 5163639 | 674 SAT1_CF  | blue | na |
| chrUn | 5163652 | 5164154 | 503 SAT1_CF  | blue | na |
| chrUn | 5164242 | 5164595 | 354 SAT1_CF  | blue | na |
| chrUn | 5164608 | 5165117 | 510 SAT1_CF  | blue | na |

|       |         |         |              |      |    |
|-------|---------|---------|--------------|------|----|
| chrUn | 5165196 | 5165948 | 753 SAT1_CF  | blue | na |
| chrUn | 5165969 | 5166670 | 702 SAT1_CF  | blue | na |
| chrUn | 5166697 | 5168451 | 1755 SAT1_CF | blue | na |
| chrUn | 5168474 | 5168579 | 106 SAT1_CF  | blue | na |
| chrUn | 5168592 | 5169094 | 503 SAT1_CF  | blue | na |
| chrUn | 5169107 | 5169614 | 508 SAT1_CF  | blue | na |
| chrUn | 5169730 | 5170274 | 545 SAT1_CF  | blue | na |
| chrUn | 5170288 | 5171170 | 883 SAT1_CF  | blue | na |
| chrUn | 5171213 | 5171878 | 666 SAT1_CF  | blue | na |
| chrUn | 5171900 | 5172450 | 551 SAT1_CF  | blue | na |
| chrUn | 5172493 | 5173055 | 563 SAT1_CF  | blue | na |
| chrUn | 5173120 | 5174484 | 1365 SAT1_CF | blue | na |
| chrUn | 5174498 | 5174990 | 493 SAT1_CF  | blue | na |
| chrUn | 5175001 | 5175551 | 551 SAT1_CF  | blue | na |
| chrUn | 5175611 | 5175788 | 178 SAT1_CF  | blue | na |
| chrUn | 5175830 | 5177343 | 1514 SAT1_CF | blue | na |
| chrUn | 5177365 | 5177867 | 503 SAT1_CF  | blue | na |
| chrUn | 5177933 | 5178069 | 137 SAT1_CF  | blue | na |
| chrUn | 5178084 | 5179289 | 1206 SAT1_CF | blue | na |
| chrUn | 5179317 | 5179946 | 630 SAT1_CF  | blue | na |
| chrUn | 5179989 | 5182056 | 2068 SAT1_CF | blue | na |
| chrUn | 5182076 | 5182550 | 475 SAT1_CF  | blue | na |
| chrUn | 5182611 | 5183182 | 572 SAT1_CF  | blue | na |
| chrUn | 5184572 | 5185158 | 587 SAT1_CF  | blue | na |
| chrUn | 5185172 | 5186055 | 884 SAT1_CF  | blue | na |
| chrUn | 5186098 | 5186700 | 603 SAT1_CF  | blue | na |
| chrUn | 5186711 | 5187308 | 598 SAT1_CF  | blue | na |
| chrUn | 5187330 | 5187850 | 521 SAT1_CF  | blue | na |
| chrUn | 5187876 | 5187984 | 109 SAT1_CF  | blue | na |
| chrUn | 5187995 | 5189123 | 1129 SAT1_CF | blue | na |
| chrUn | 5189151 | 5189690 | 540 SAT1_CF  | blue | na |
| chrUn | 5189733 | 5190409 | 677 SAT1_CF  | blue | na |
| chrUn | 5190421 | 5191104 | 684 SAT1_CF  | blue | na |
| chrUn | 5191117 | 5191619 | 503 SAT1_CF  | blue | na |
| chrUn | 5191657 | 5192223 | 567 SAT1_CF  | blue | na |
| chrUn | 5192258 | 5192810 | 553 SAT1_CF  | blue | na |
| chrUn | 5192829 | 5193860 | 1032 SAT1_CF | blue | na |
| chrUn | 5193907 | 5194454 | 548 SAT1_CF  | blue | na |
| chrUn | 5194533 | 5195513 | 981 SAT1_CF  | blue | na |
| chrUn | 5195555 | 5196230 | 676 SAT1_CF  | blue | na |
| chrUn | 5196242 | 5197360 | 1119 SAT1_CF | blue | na |
| chrUn | 5197400 | 5197973 | 574 SAT1_CF  | blue | na |

|       |         |         |              |      |    |
|-------|---------|---------|--------------|------|----|
| chrUn | 5199358 | 5199723 | 366 SAT1_CF  | blue | na |
| chrUn | 5199766 | 5201104 | 1339 SAT1_CF | blue | na |
| chrUn | 5201157 | 5204569 | 3413 SAT1_CF | blue | na |
| chrUn | 5204582 | 5205097 | 516 SAT1_CF  | blue | na |
| chrUn | 5205144 | 5205859 | 716 SAT1_CF  | blue | na |
| chrUn | 5205938 | 5206712 | 775 SAT1_CF  | blue | na |
| chrUn | 5206755 | 5206890 | 136 SAT1_CF  | blue | na |
| chrUn | 5206903 | 5207565 | 663 SAT1_CF  | blue | na |
| chrUn | 5207592 | 5208294 | 703 SAT1_CF  | blue | na |
| chrUn | 5208309 | 5210197 | 1889 SAT1_CF | blue | na |
| chrUn | 5210241 | 5211976 | 1736 SAT1_CF | blue | na |
| chrUn | 5211992 | 5212534 | 543 SAT1_CF  | blue | na |
| chrUn | 5212576 | 5213475 | 900 SAT1_CF  | blue | na |
| chrUn | 5213487 | 5214040 | 554 SAT1_CF  | blue | na |
| chrUn | 5214064 | 5214154 | 91 SAT1_CF   | blue | na |
| chrUn | 5214181 | 5214702 | 522 SAT1_CF  | blue | na |
| chrUn | 5214721 | 5214980 | 260 SAT1_CF  | blue | na |
| chrUn | 5215024 | 5216432 | 1409 SAT1_CF | blue | na |
| chrUn | 5216451 | 5217021 | 571 SAT1_CF  | blue | na |
| chrUn | 5217086 | 5217243 | 158 SAT1_CF  | blue | na |
| chrUn | 5217294 | 5218254 | 961 SAT1_CF  | blue | na |
| chrUn | 5218292 | 5219832 | 1541 SAT1_CF | blue | na |
| chrUn | 5219856 | 5220538 | 683 SAT1_CF  | blue | na |
| chrUn | 5220551 | 5222798 | 2248 SAT1_CF | blue | na |
| chrUn | 5222826 | 5223271 | 446 SAT1_CF  | blue | na |
| chrUn | 5223285 | 5224046 | 762 SAT1_CF  | blue | na |
| chrUn | 5224059 | 5224761 | 703 SAT1_CF  | blue | na |
| chrUn | 5224776 | 5225301 | 526 SAT1_CF  | blue | na |
| chrUn | 5225332 | 5225869 | 538 SAT1_CF  | blue | na |
| chrUn | 5225913 | 5226635 | 723 SAT1_CF  | blue | na |
| chrUn | 5226678 | 5227338 | 661 SAT1_CF  | blue | na |
| chrUn | 5227351 | 5227899 | 549 SAT1_CF  | blue | na |
| chrUn | 5227943 | 5228283 | 341 SAT1_CF  | blue | na |
| chrUn | 5228327 | 5230431 | 2105 SAT1_CF | blue | na |
| chrUn | 5230444 | 5230963 | 520 SAT1_CF  | blue | na |
| chrUn | 5231031 | 5233052 | 2022 SAT1_CF | blue | na |
| chrUn | 5233065 | 5233839 | 775 SAT1_CF  | blue | na |
| chrUn | 5233852 | 5234352 | 501 SAT1_CF  | blue | na |
| chrUn | 5234412 | 5234554 | 143 SAT1_CF  | blue | na |
| chrUn | 5234569 | 5235315 | 747 SAT1_CF  | blue | na |
| chrUn | 5235376 | 5236708 | 1333 SAT1_CF | blue | na |
| chrUn | 5236720 | 5237238 | 519 SAT1_CF  | blue | na |

|       |         |         |              |      |    |
|-------|---------|---------|--------------|------|----|
| chrUn | 5237270 | 5237552 | 283 SAT1_CF  | blue | na |
| chrUn | 5237594 | 5238137 | 544 SAT1_CF  | blue | na |
| chrUn | 5238179 | 5238726 | 548 SAT1_CF  | blue | na |
| chrUn | 5238783 | 5239302 | 520 SAT1_CF  | blue | na |
| chrUn | 5239397 | 5239534 | 138 SAT1_CF  | blue | na |
| chrUn | 5239560 | 5240617 | 1058 SAT1_CF | blue | na |
| chrUn | 5240648 | 5241452 | 805 SAT1_CF  | blue | na |
| chrUn | 5241500 | 5242804 | 1305 SAT1_CF | blue | na |
| chrUn | 5242826 | 5242980 | 155 SAT1_CF  | blue | na |
| chrUn | 5243041 | 5243718 | 678 SAT1_CF  | blue | na |
| chrUn | 5243730 | 5244413 | 684 SAT1_CF  | blue | na |
| chrUn | 5244425 | 5245335 | 911 SAT1_CF  | blue | na |
| chrUn | 5245378 | 5246752 | 1375 SAT1_CF | blue | na |
| chrUn | 5246764 | 5247283 | 520 SAT1_CF  | blue | na |
| chrUn | 5247309 | 5247688 | 380 SAT1_CF  | blue | na |
| chrUn | 5247711 | 5247816 | 106 SAT1_CF  | blue | na |
| chrUn | 5247829 | 5248348 | 520 SAT1_CF  | blue | na |
| chrUn | 5248395 | 5248531 | 137 SAT1_CF  | blue | na |
| chrUn | 5248559 | 5249070 | 512 SAT1_CF  | blue | na |
| chrUn | 5249149 | 5251188 | 2040 SAT1_CF | blue | na |
| chrUn | 5251218 | 5252277 | 1060 SAT1_CF | blue | na |
| chrUn | 5252298 | 5252407 | 110 SAT1_CF  | blue | na |
| chrUn | 5252419 | 5252921 | 503 SAT1_CF  | blue | na |
| chrUn | 5252961 | 5254453 | 1493 SAT1_CF | blue | na |
| chrUn | 5254475 | 5254999 | 525 SAT1_CF  | blue | na |
| chrUn | 5255042 | 5255709 | 668 SAT1_CF  | blue | na |
| chrUn | 5255731 | 5257194 | 1464 SAT1_CF | blue | na |
| chrUn | 5257310 | 5258276 | 967 SAT1_CF  | blue | na |
| chrUn | 5258319 | 5258987 | 669 SAT1_CF  | blue | na |
| chrUn | 5259007 | 5259519 | 513 SAT1_CF  | blue | na |
| chrUn | 5259538 | 5260470 | 933 SAT1_CF  | blue | na |
| chrUn | 5260491 | 5261401 | 911 SAT1_CF  | blue | na |
| chrUn | 5261413 | 5262616 | 1204 SAT1_CF | blue | na |
| chrUn | 5262661 | 5262818 | 158 SAT1_CF  | blue | na |
| chrUn | 5262864 | 5264004 | 1141 SAT1_CF | blue | na |
| chrUn | 5264090 | 5264935 | 846 SAT1_CF  | blue | na |
| chrUn | 5264948 | 5265502 | 555 SAT1_CF  | blue | na |
| chrUn | 5265566 | 5265630 | 65 SAT1_CF   | blue | na |
| chrUn | 5265650 | 5266420 | 771 SAT1_CF  | blue | na |
| chrUn | 5266485 | 5267158 | 674 SAT1_CF  | blue | na |
| chrUn | 5267171 | 5267671 | 501 SAT1_CF  | blue | na |
| chrUn | 5267716 | 5267872 | 157 SAT1_CF  | blue | na |



|       |         |         |              |      |    |
|-------|---------|---------|--------------|------|----|
| chrUn | 5267905 | 5269080 | 1176 SAT1_CF | blue | na |
| chrUn | 5269103 | 5269208 | 106 SAT1_CF  | blue | na |
| chrUn | 5269221 | 5269738 | 518 SAT1_CF  | blue | na |
| chrUn | 5269757 | 5271797 | 2041 SAT1_CF | blue | na |
| chrUn | 5271841 | 5272516 | 676 SAT1_CF  | blue | na |
| chrUn | 5272528 | 5273166 | 639 SAT1_CF  | blue | na |
| chrUn | 5279705 | 5279793 | 89 SAT1_CF   | blue | na |
| chrUn | 5279806 | 5280288 | 483 SAT1_CF  | blue | na |
| chrUn | 5280348 | 5280743 | 396 SAT1_CF  | blue | na |
| chrUn | 5280758 | 5281306 | 549 SAT1_CF  | blue | na |
| chrUn | 5281344 | 5282195 | 852 SAT1_CF  | blue | na |
| chrUn | 5282207 | 5282852 | 646 SAT1_CF  | blue | na |
| chrUn | 5282901 | 5283400 | 500 SAT1_CF  | blue | na |
| chrUn | 5283440 | 5284409 | 970 SAT1_CF  | blue | na |
| chrUn | 5284440 | 5285344 | 905 SAT1_CF  | blue | na |
| chrUn | 5285386 | 5286251 | 866 SAT1_CF  | blue | na |
| chrUn | 5286263 | 5286817 | 555 SAT1_CF  | blue | na |
| chrUn | 5286884 | 5287733 | 850 SAT1_CF  | blue | na |
| chrUn | 5287850 | 5289892 | 2043 SAT1_CF | blue | na |
| chrUn | 5289935 | 5290497 | 563 SAT1_CF  | blue | na |
| chrUn | 5290562 | 5291104 | 543 SAT1_CF  | blue | na |
| chrUn | 5291146 | 5292537 | 1392 SAT1_CF | blue | na |
| chrUn | 5292550 | 5293030 | 481 SAT1_CF  | blue | na |
| chrUn | 5293092 | 5293492 | 401 SAT1_CF  | blue | na |
| chrUn | 5293505 | 5295121 | 1617 SAT1_CF | blue | na |
| chrUn | 5295169 | 5295845 | 677 SAT1_CF  | blue | na |
| chrUn | 5295857 | 5296459 | 603 SAT1_CF  | blue | na |
| chrUn | 5296470 | 5297149 | 680 SAT1_CF  | blue | na |
| chrUn | 5297161 | 5297808 | 648 SAT1_CF  | blue | na |
| chrUn | 5297863 | 5298376 | 514 SAT1_CF  | blue | na |
| chrUn | 5298397 | 5299043 | 647 SAT1_CF  | blue | na |
| chrUn | 5299064 | 5300406 | 1343 SAT1_CF | blue | na |
| chrUn | 5300426 | 5301760 | 1335 SAT1_CF | blue | na |
| chrUn | 5301773 | 5302790 | 1018 SAT1_CF | blue | na |
| chrUn | 5302833 | 5303509 | 677 SAT1_CF  | blue | na |
| chrUn | 5303521 | 5304087 | 567 SAT1_CF  | blue | na |
| chrUn | 5304138 | 5305094 | 957 SAT1_CF  | blue | na |
| chrUn | 5305173 | 5305954 | 782 SAT1_CF  | blue | na |
| chrUn | 5305997 | 5306730 | 734 SAT1_CF  | blue | na |
| chrUn | 5306749 | 5307319 | 571 SAT1_CF  | blue | na |
| chrUn | 5307384 | 5307541 | 158 SAT1_CF  | blue | na |
| chrUn | 5307556 | 5308758 | 1203 SAT1_CF | blue | na |

|       |         |         |              |      |    |
|-------|---------|---------|--------------|------|----|
| chrUn | 5308802 | 5310004 | 1203 SAT1_CF | blue | na |
| chrUn | 5310060 | 5310196 | 137 SAT1_CF  | blue | na |
| chrUn | 5310261 | 5310803 | 543 SAT1_CF  | blue | na |
| chrUn | 5310846 | 5311521 | 676 SAT1_CF  | blue | na |
| chrUn | 5311533 | 5312087 | 555 SAT1_CF  | blue | na |
| chrUn | 5312130 | 5313208 | 1079 SAT1_CF | blue | na |
| chrUn | 5313240 | 5313280 | 41 SAT1_CF   | blue | na |
| chrUn | 5313293 | 5313460 | 168 SAT1_CF  | blue | na |
| chrUn | 5313472 | 5314144 | 673 SAT1_CF  | blue | na |
| chrUn | 5314157 | 5314638 | 482 SAT1_CF  | blue | na |
| chrUn | 5314664 | 5315507 | 844 SAT1_CF  | blue | na |
| chrUn | 5315567 | 5316539 | 973 SAT1_CF  | blue | na |
| chrUn | 5316571 | 5317646 | 1076 SAT1_CF | blue | na |
| chrUn | 5317690 | 5318364 | 675 SAT1_CF  | blue | na |
| chrUn | 5318391 | 5318977 | 587 SAT1_CF  | blue | na |
| chrUn | 5319004 | 5319477 | 474 SAT1_CF  | blue | na |
| chrUn | 5319505 | 5320714 | 1210 SAT1_CF | blue | na |
| chrUn | 5320756 | 5321430 | 675 SAT1_CF  | blue | na |
| chrUn | 5321442 | 5321939 | 498 SAT1_CF  | blue | na |
| chrUn | 5321984 | 5322139 | 156 SAT1_CF  | blue | na |
| chrUn | 5322352 | 5322875 | 524 SAT1_CF  | blue | na |
| chrUn | 5322889 | 5322969 | 81 SAT1_CF   | blue | na |
| chrUn | 5322982 | 5323733 | 752 SAT1_CF  | blue | na |
| chrUn | 5323755 | 5324405 | 651 SAT1_CF  | blue | na |
| chrUn | 5324419 | 5324926 | 508 SAT1_CF  | blue | na |
| chrUn | 5324969 | 5325310 | 342 SAT1_CF  | blue | na |
| chrUn | 5325353 | 5327748 | 2396 SAT1_CF | blue | na |
| chrUn | 5327835 | 5328190 | 356 SAT1_CF  | blue | na |
| chrUn | 5328201 | 5328814 | 614 SAT1_CF  | blue | na |
| chrUn | 5328825 | 5329712 | 888 SAT1_CF  | blue | na |
| chrUn | 5329730 | 5330230 | 501 SAT1_CF  | blue | na |
| chrUn | 5330243 | 5331301 | 1059 SAT1_CF | blue | na |
| chrUn | 5331322 | 5331430 | 109 SAT1_CF  | blue | na |
| chrUn | 5331443 | 5331916 | 474 SAT1_CF  | blue | na |
| chrUn | 5331972 | 5332157 | 186 SAT1_CF  | blue | na |
| chrUn | 5332339 | 5332504 | 166 SAT1_CF  | blue | na |
| chrUn | 5332516 | 5333553 | 1038 SAT1_CF | blue | na |
| chrUn | 5333581 | 5335500 | 1920 SAT1_CF | blue | na |
| chrUn | 5335526 | 5335683 | 158 SAT1_CF  | blue | na |
| chrUn | 5335698 | 5336329 | 632 SAT1_CF  | blue | na |
| chrUn | 5336340 | 5336894 | 555 SAT1_CF  | blue | na |
| chrUn | 5336953 | 5337023 | 71 SAT1_CF   | blue | na |

|       |         |         |              |      |    |
|-------|---------|---------|--------------|------|----|
| chrUn | 5337036 | 5337235 | 200 SAT1_CF  | blue | na |
| chrUn | 5351503 | 5353865 | 2363 SAT1_CF | blue | na |
| chrUn | 5353878 | 5354380 | 503 SAT1_CF  | blue | na |
| chrUn | 5354482 | 5355967 | 1486 SAT1_CF | blue | na |
| chrUn | 5355979 | 5356624 | 646 SAT1_CF  | blue | na |
| chrUn | 5356637 | 5357564 | 928 SAT1_CF  | blue | na |
| chrUn | 5357576 | 5358259 | 684 SAT1_CF  | blue | na |
| chrUn | 5358271 | 5360563 | 2293 SAT1_CF | blue | na |
| chrUn | 5360589 | 5361070 | 482 SAT1_CF  | blue | na |
| chrUn | 5361130 | 5361831 | 702 SAT1_CF  | blue | na |
| chrUn | 5361911 | 5362474 | 564 SAT1_CF  | blue | na |
| chrUn | 5362501 | 5363131 | 631 SAT1_CF  | blue | na |
| chrUn | 5363174 | 5363838 | 665 SAT1_CF  | blue | na |
| chrUn | 5363858 | 5366073 | 2216 SAT1_CF | blue | na |
| chrUn | 5366085 | 5366639 | 555 SAT1_CF  | blue | na |
| chrUn | 5366664 | 5366772 | 109 SAT1_CF  | blue | na |
| chrUn | 5366786 | 5367286 | 501 SAT1_CF  | blue | na |
| chrUn | 5367352 | 5367488 | 137 SAT1_CF  | blue | na |
| chrUn | 5367503 | 5368773 | 1271 SAT1_CF | blue | na |
| chrUn | 5368831 | 5368901 | 71 SAT1_CF   | blue | na |
| chrUn | 5368914 | 5369413 | 500 SAT1_CF  | blue | na |
| chrUn | 5369449 | 5369634 | 186 SAT1_CF  | blue | na |
| chrUn | 5369816 | 5369985 | 170 SAT1_CF  | blue | na |
| chrUn | 5370065 | 5372413 | 2349 SAT1_CF | blue | na |
| chrUn | 5372425 | 5373799 | 1375 SAT1_CF | blue | na |
| chrUn | 5373842 | 5374302 | 461 SAT1_CF  | blue | na |
| chrUn | 5374323 | 5374952 | 630 SAT1_CF  | blue | na |
| chrUn | 5374976 | 5375082 | 107 SAT1_CF  | blue | na |
| chrUn | 5375094 | 5375618 | 525 SAT1_CF  | blue | na |
| chrUn | 5375670 | 5376417 | 748 SAT1_CF  | blue | na |
| chrUn | 5376474 | 5378643 | 2170 SAT1_CF | blue | na |
| chrUn | 5378679 | 5378864 | 186 SAT1_CF  | blue | na |
| chrUn | 5379044 | 5379759 | 716 SAT1_CF  | blue | na |
| chrUn | 5379770 | 5381892 | 2123 SAT1_CF | blue | na |
| chrUn | 5381904 | 5382750 | 847 SAT1_CF  | blue | na |
| chrUn | 5382781 | 5384409 | 1629 SAT1_CF | blue | na |
| chrUn | 5384452 | 5385126 | 675 SAT1_CF  | blue | na |
| chrUn | 5385138 | 5385768 | 631 SAT1_CF  | blue | na |
| chrUn | 5385790 | 5385896 | 107 SAT1_CF  | blue | na |
| chrUn | 5385909 | 5386410 | 502 SAT1_CF  | blue | na |
| chrUn | 5386450 | 5387557 | 1108 SAT1_CF | blue | na |
| chrUn | 5387568 | 5388070 | 503 SAT1_CF  | blue | na |

|       |         |         |              |      |    |
|-------|---------|---------|--------------|------|----|
| chrUn | 5388123 | 5389253 | 1131 SAT1_CF | blue | na |
| chrUn | 5389268 | 5389965 | 698 SAT1_CF  | blue | na |
| chrUn | 5390007 | 5390124 | 118 SAT1_CF  | blue | na |
| chrUn | 5390171 | 5390831 | 661 SAT1_CF  | blue | na |
| chrUn | 5390858 | 5391360 | 503 SAT1_CF  | blue | na |
| chrUn | 5391474 | 5391802 | 329 SAT1_CF  | blue | na |
| chrUn | 5391815 | 5392323 | 509 SAT1_CF  | blue | na |
| chrUn | 5392402 | 5393787 | 1386 SAT1_CF | blue | na |
| chrUn | 5393904 | 5395096 | 1193 SAT1_CF | blue | na |
| chrUn | 5395108 | 5395663 | 556 SAT1_CF  | blue | na |
| chrUn | 5395684 | 5396303 | 620 SAT1_CF  | blue | na |
| chrUn | 5396390 | 5398406 | 2017 SAT1_CF | blue | na |
| chrUn | 5398424 | 5399755 | 1332 SAT1_CF | blue | na |
| chrUn | 5399768 | 5400814 | 1047 SAT1_CF | blue | na |
| chrUn | 5402395 | 5403316 | 922 SAT1_CF  | blue | na |
| chrUn | 5403329 | 5403830 | 502 SAT1_CF  | blue | na |
| chrUn | 5403875 | 5404032 | 158 SAT1_CF  | blue | na |
| chrUn | 5404060 | 5406881 | 2822 SAT1_CF | blue | na |
| chrUn | 5406951 | 5407625 | 675 SAT1_CF  | blue | na |
| chrUn | 5407637 | 5408164 | 528 SAT1_CF  | blue | na |
| chrUn | 5408217 | 5408293 | 77 SAT1_CF   | blue | na |
| chrUn | 5408306 | 5409670 | 1365 SAT1_CF | blue | na |
| chrUn | 5409717 | 5410185 | 469 SAT1_CF  | blue | na |
| chrUn | 5410201 | 5411126 | 926 SAT1_CF  | blue | na |
| chrUn | 5411170 | 5412505 | 1336 SAT1_CF | blue | na |
| chrUn | 5412517 | 5413227 | 711 SAT1_CF  | blue | na |
| chrUn | 5413241 | 5413357 | 117 SAT1_CF  | blue | na |
| chrUn | 5413369 | 5413889 | 521 SAT1_CF  | blue | na |
| chrUn | 5413957 | 5415766 | 1810 SAT1_CF | blue | na |
| chrUn | 5415808 | 5416660 | 853 SAT1_CF  | blue | na |
| chrUn | 5416678 | 5417357 | 680 SAT1_CF  | blue | na |
| chrUn | 5417371 | 5417863 | 493 SAT1_CF  | blue | na |
| chrUn | 5417874 | 5420253 | 2380 SAT1_CF | blue | na |
| chrUn | 5420275 | 5420796 | 522 SAT1_CF  | blue | na |
| chrUn | 5420830 | 5421219 | 390 SAT1_CF  | blue | na |
| chrUn | 5421232 | 5421839 | 608 SAT1_CF  | blue | na |
| chrUn | 5421894 | 5422859 | 966 SAT1_CF  | blue | na |
| chrUn | 5422902 | 5423566 | 665 SAT1_CF  | blue | na |
| chrUn | 5423589 | 5424271 | 683 SAT1_CF  | blue | na |
| chrUn | 5424291 | 5424785 | 495 SAT1_CF  | blue | na |
| chrUn | 5424825 | 5425398 | 574 SAT1_CF  | blue | na |
| chrUn | 5426795 | 5428085 | 1291 SAT1_CF | blue | na |

|       |         |         |              |      |    |
|-------|---------|---------|--------------|------|----|
| chrUn | 5428127 | 5428439 | 313 SAT1_CF  | blue | na |
| chrUn | 5428481 | 5429001 | 521 SAT1_CF  | blue | na |
| chrUn | 5429026 | 5429400 | 375 SAT1_CF  | blue | na |
| chrUn | 5429432 | 5431770 | 2339 SAT1_CF | blue | na |
| chrUn | 5431783 | 5432898 | 1116 SAT1_CF | blue | na |
| chrUn | 5432983 | 5433834 | 852 SAT1_CF  | blue | na |
| chrUn | 5433847 | 5435218 | 1372 SAT1_CF | blue | na |
| chrUn | 5435256 | 5436216 | 961 SAT1_CF  | blue | na |
| chrUn | 5436295 | 5436620 | 326 SAT1_CF  | blue | na |
| chrUn | 5436645 | 5437979 | 1335 SAT1_CF | blue | na |
| chrUn | 5437991 | 5438493 | 503 SAT1_CF  | blue | na |
| chrUn | 5438529 | 5438901 | 373 SAT1_CF  | blue | na |
| chrUn | 5438944 | 5441049 | 2106 SAT1_CF | blue | na |
| chrUn | 5441061 | 5441615 | 555 SAT1_CF  | blue | na |
| chrUn | 5441637 | 5441743 | 107 SAT1_CF  | blue | na |
| chrUn | 5441756 | 5442257 | 502 SAT1_CF  | blue | na |
| chrUn | 5442305 | 5442412 | 108 SAT1_CF  | blue | na |
| chrUn | 5442476 | 5443001 | 526 SAT1_CF  | blue | na |
| chrUn | 5443042 | 5443502 | 461 SAT1_CF  | blue | na |
| chrUn | 5443577 | 5444122 | 546 SAT1_CF  | blue | na |
| chrUn | 5444152 | 5445793 | 1642 SAT1_CF | blue | na |
| chrUn | 5445820 | 5446301 | 482 SAT1_CF  | blue | na |
| chrUn | 5446327 | 5447393 | 1067 SAT1_CF | blue | na |
| chrUn | 5447411 | 5447891 | 481 SAT1_CF  | blue | na |
| chrUn | 5447957 | 5448359 | 403 SAT1_CF  | blue | na |
| chrUn | 5448372 | 5450739 | 2368 SAT1_CF | blue | na |
| chrUn | 5450761 | 5451318 | 558 SAT1_CF  | blue | na |
| chrUn | 5451340 | 5451488 | 149 SAT1_CF  | blue | na |
| chrUn | 5451501 | 5452003 | 503 SAT1_CF  | blue | na |
| chrUn | 5452058 | 5452444 | 387 SAT1_CF  | blue | na |
| chrUn | 5452481 | 5453491 | 1011 SAT1_CF | blue | na |
| chrUn | 5453511 | 5453618 | 108 SAT1_CF  | blue | na |
| chrUn | 5453631 | 5454150 | 520 SAT1_CF  | blue | na |
| chrUn | 5454171 | 5454352 | 182 SAT1_CF  | blue | na |
| chrUn | 5454533 | 5456871 | 2339 SAT1_CF | blue | na |
| chrUn | 5456916 | 5457565 | 650 SAT1_CF  | blue | na |
| chrUn | 5457609 | 5458462 | 854 SAT1_CF  | blue | na |
| chrUn | 5458485 | 5459038 | 554 SAT1_CF  | blue | na |
| chrUn | 5459059 | 5459164 | 106 SAT1_CF  | blue | na |
| chrUn | 5459177 | 5459780 | 604 SAT1_CF  | blue | na |
| chrUn | 5459792 | 5461042 | 1251 SAT1_CF | blue | na |
| chrUn | 5461086 | 5462004 | 919 SAT1_CF  | blue | na |

|       |         |         |              |      |    |
|-------|---------|---------|--------------|------|----|
| chrUn | 5462063 | 5462715 | 653 SAT1_CF  | blue | na |
| chrUn | 5462738 | 5463239 | 502 SAT1_CF  | blue | na |
| chrUn | 5463277 | 5463685 | 409 SAT1_CF  | blue | na |
| chrUn | 5463727 | 5464800 | 1074 SAT1_CF | blue | na |
| chrUn | 5464814 | 5465353 | 540 SAT1_CF  | blue | na |
| chrUn | 5465396 | 5466058 | 663 SAT1_CF  | blue | na |
| chrUn | 5466070 | 5466829 | 760 SAT1_CF  | blue | na |
| chrUn | 5466842 | 5467394 | 553 SAT1_CF  | blue | na |
| chrUn | 5467417 | 5467523 | 107 SAT1_CF  | blue | na |
| chrUn | 5467536 | 5468037 | 502 SAT1_CF  | blue | na |
| chrUn | 5468077 | 5469185 | 1109 SAT1_CF | blue | na |
| chrUn | 5469196 | 5469678 | 483 SAT1_CF  | blue | na |
| chrUn | 5469764 | 5469900 | 137 SAT1_CF  | blue | na |
| chrUn | 5469915 | 5471153 | 1239 SAT1_CF | blue | na |
| chrUn | 5471197 | 5471722 | 526 SAT1_CF  | blue | na |
| chrUn | 5471753 | 5472245 | 493 SAT1_CF  | blue | na |
| chrUn | 5472389 | 5474355 | 1967 SAT1_CF | blue | na |
| chrUn | 5474404 | 5475076 | 673 SAT1_CF  | blue | na |
| chrUn | 5475089 | 5475591 | 503 SAT1_CF  | blue | na |
| chrUn | 5475636 | 5475792 | 157 SAT1_CF  | blue | na |
| chrUn | 5475821 | 5477530 | 1710 SAT1_CF | blue | na |
| chrUn | 5477542 | 5478040 | 499 SAT1_CF  | blue | na |
| chrUn | 5478080 | 5479163 | 1084 SAT1_CF | blue | na |
| chrUn | 5479186 | 5479641 | 456 SAT1_CF  | blue | na |
| chrUn | 5479702 | 5479882 | 181 SAT1_CF  | blue | na |
| chrUn | 5480062 | 5482820 | 2759 SAT1_CF | blue | na |
| chrUn | 5482862 | 5483416 | 555 SAT1_CF  | blue | na |
| chrUn | 5483460 | 5484723 | 1264 SAT1_CF | blue | na |
| chrUn | 5484744 | 5484852 | 109 SAT1_CF  | blue | na |
| chrUn | 5484865 | 5485366 | 502 SAT1_CF  | blue | na |
| chrUn | 5485406 | 5486412 | 1007 SAT1_CF | blue | na |
| chrUn | 5486479 | 5487444 | 966 SAT1_CF  | blue | na |
| chrUn | 5487487 | 5488164 | 678 SAT1_CF  | blue | na |
| chrUn | 5488176 | 5488677 | 502 SAT1_CF  | blue | na |
| chrUn | 5488715 | 5488975 | 261 SAT1_CF  | blue | na |
| chrUn | 5489020 | 5490262 | 1243 SAT1_CF | blue | na |
| chrUn | 5490274 | 5490920 | 647 SAT1_CF  | blue | na |
| chrUn | 5490933 | 5491307 | 375 SAT1_CF  | blue | na |
| chrUn | 5491679 | 5492219 | 541 SAT1_CF  | blue | na |
| chrUn | 5492231 | 5492914 | 684 SAT1_CF  | blue | na |
| chrUn | 5492926 | 5493556 | 631 SAT1_CF  | blue | na |
| chrUn | 5493579 | 5493684 | 106 SAT1_CF  | blue | na |

|       |         |         |              |      |    |
|-------|---------|---------|--------------|------|----|
| chrUn | 5493697 | 5494216 | 520 SAT1_CF  | blue | na |
| chrUn | 5494233 | 5494418 | 186 SAT1_CF  | blue | na |
| chrUn | 5494601 | 5494766 | 166 SAT1_CF  | blue | na |
| chrUn | 5494846 | 5495455 | 610 SAT1_CF  | blue | na |
| chrUn | 5495475 | 5496634 | 1160 SAT1_CF | blue | na |
| chrUn | 5496646 | 5497278 | 633 SAT1_CF  | blue | na |
| chrUn | 5497348 | 5498975 | 1628 SAT1_CF | blue | na |
| chrUn | 5498998 | 5499103 | 106 SAT1_CF  | blue | na |
| chrUn | 5499116 | 5499635 | 520 SAT1_CF  | blue | na |
| chrUn | 5499656 | 5499837 | 182 SAT1_CF  | blue | na |
| chrUn | 5500019 | 5501679 | 1661 SAT1_CF | blue | na |
| chrUn | 5501755 | 5502615 | 861 SAT1_CF  | blue | na |
| chrUn | 5502629 | 5503257 | 629 SAT1_CF  | blue | na |
| chrUn | 5503279 | 5503388 | 110 SAT1_CF  | blue | na |
| chrUn | 5503399 | 5504468 | 1070 SAT1_CF | blue | na |
| chrUn | 5504525 | 5505004 | 480 SAT1_CF  | blue | na |
| chrUn | 5505018 | 5505707 | 690 SAT1_CF  | blue | na |
| chrUn | 5505768 | 5506312 | 545 SAT1_CF  | blue | na |
| chrUn | 5506333 | 5506442 | 110 SAT1_CF  | blue | na |
| chrUn | 5506454 | 5507726 | 1273 SAT1_CF | blue | na |
| chrUn | 5507771 | 5507928 | 158 SAT1_CF  | blue | na |
| chrUn | 5507993 | 5509335 | 1343 SAT1_CF | blue | na |
| chrUn | 5509366 | 5509884 | 519 SAT1_CF  | blue | na |
| chrUn | 5510001 | 5511993 | 1993 SAT1_CF | blue | na |
| chrUn | 5512036 | 5512710 | 675 SAT1_CF  | blue | na |
| chrUn | 5512723 | 5513223 | 501 SAT1_CF  | blue | na |
| chrUn | 5513288 | 5513423 | 136 SAT1_CF  | blue | na |
| chrUn | 5513456 | 5514631 | 1176 SAT1_CF | blue | na |
| chrUn | 5514659 | 5514759 | 101 SAT1_CF  | blue | na |
| chrUn | 5514772 | 5515250 | 479 SAT1_CF  | blue | na |
| chrUn | 5515308 | 5516333 | 1026 SAT1_CF | blue | na |
| chrUn | 5516350 | 5517346 | 997 SAT1_CF  | blue | na |
| chrUn | 5517390 | 5518065 | 676 SAT1_CF  | blue | na |
| chrUn | 5518077 | 5518845 | 769 SAT1_CF  | blue | na |
| chrUn | 5518866 | 5519657 | 792 SAT1_CF  | blue | na |
| chrUn | 5519701 | 5520377 | 677 SAT1_CF  | blue | na |
| chrUn | 5520397 | 5520891 | 495 SAT1_CF  | blue | na |
| chrUn | 5520978 | 5521495 | 518 SAT1_CF  | blue | na |
| chrUn | 5522912 | 5523490 | 579 SAT1_CF  | blue | na |
| chrUn | 5523543 | 5524845 | 1303 SAT1_CF | blue | na |
| chrUn | 5524889 | 5525563 | 675 SAT1_CF  | blue | na |
| chrUn | 5525576 | 5526183 | 608 SAT1_CF  | blue | na |

|       |         |         |              |      |    |
|-------|---------|---------|--------------|------|----|
| chrUn | 5526195 | 5526896 | 702 SAT1_CF  | blue | na |
| chrUn | 5526911 | 5528103 | 1193 SAT1_CF | blue | na |
| chrUn | 5528126 | 5528231 | 106 SAT1_CF  | blue | na |
| chrUn | 5528244 | 5528724 | 481 SAT1_CF  | blue | na |
| chrUn | 5528784 | 5528965 | 182 SAT1_CF  | blue | na |
| chrUn | 5529147 | 5531023 | 1877 SAT1_CF | blue | na |
| chrUn | 5531067 | 5531743 | 677 SAT1_CF  | blue | na |
| chrUn | 5531757 | 5532309 | 553 SAT1_CF  | blue | na |
| chrUn | 5532331 | 5532440 | 110 SAT1_CF  | blue | na |
| chrUn | 5532451 | 5534056 | 1606 SAT1_CF | blue | na |
| chrUn | 5534070 | 5534614 | 545 SAT1_CF  | blue | na |
| chrUn | 5534657 | 5535491 | 835 SAT1_CF  | blue | na |
| chrUn | 5535505 | 5536134 | 630 SAT1_CF  | blue | na |
| chrUn | 5536156 | 5536776 | 621 SAT1_CF  | blue | na |
| chrUn | 5536863 | 5537751 | 889 SAT1_CF  | blue | na |
| chrUn | 5537765 | 5538478 | 714 SAT1_CF  | blue | na |
| chrUn | 5538548 | 5539201 | 654 SAT1_CF  | blue | na |
| chrUn | 5539213 | 5540929 | 1717 SAT1_CF | blue | na |
| chrUn | 5540941 | 5541499 | 559 SAT1_CF  | blue | na |
| chrUn | 5541521 | 5541650 | 130 SAT1_CF  | blue | na |
| chrUn | 5541696 | 5542920 | 1225 SAT1_CF | blue | na |
| chrUn | 5542933 | 5543433 | 501 SAT1_CF  | blue | na |
| chrUn | 5543478 | 5544918 | 1441 SAT1_CF | blue | na |
| chrUn | 5544944 | 5545049 | 106 SAT1_CF  | blue | na |
| chrUn | 5545062 | 5545761 | 700 SAT1_CF  | blue | na |
| chrUn | 5642061 | 5642508 | 448 SAT1_CF  | blue | na |
| chrUn | 5642522 | 5643023 | 502 SAT1_CF  | blue | na |
| chrUn | 5643059 | 5643244 | 186 SAT1_CF  | blue | na |
| chrUn | 5643425 | 5644261 | 837 SAT1_CF  | blue | na |
| chrUn | 5644273 | 5645033 | 761 SAT1_CF  | blue | na |
| chrUn | 5645047 | 5645548 | 502 SAT1_CF  | blue | na |
| chrUn | 5645588 | 5646931 | 1344 SAT1_CF | blue | na |
| chrUn | 5646974 | 5648308 | 1335 SAT1_CF | blue | na |
| chrUn | 5648320 | 5649081 | 762 SAT1_CF  | blue | na |
| chrUn | 5649101 | 5649697 | 597 SAT1_CF  | blue | na |
| chrUn | 5649709 | 5650210 | 502 SAT1_CF  | blue | na |
| chrUn | 5650250 | 5650724 | 475 SAT1_CF  | blue | na |
| chrUn | 5650737 | 5652289 | 1553 SAT1_CF | blue | na |
| chrUn | 5652332 | 5654418 | 2087 SAT1_CF | blue | na |
| chrUn | 5654436 | 5654957 | 522 SAT1_CF  | blue | na |
| chrUn | 5654976 | 5656498 | 1523 SAT1_CF | blue | na |
| chrUn | 5656542 | 5657199 | 658 SAT1_CF  | blue | na |



|       |         |         |              |      |    |
|-------|---------|---------|--------------|------|----|
| chrUn | 5657243 | 5657791 | 549 SAT1_CF  | blue | na |
| chrUn | 5657870 | 5658195 | 326 SAT1_CF  | blue | na |
| chrUn | 5658220 | 5659553 | 1334 SAT1_CF | blue | na |
| chrUn | 5659565 | 5660085 | 521 SAT1_CF  | blue | na |
| chrUn | 5660106 | 5660504 | 399 SAT1_CF  | blue | na |
| chrUn | 5660520 | 5661486 | 967 SAT1_CF  | blue | na |
| chrUn | 5661530 | 5662071 | 542 SAT1_CF  | blue | na |
| chrUn | 5662114 | 5662664 | 551 SAT1_CF  | blue | na |
| chrUn | 5662687 | 5663532 | 846 SAT1_CF  | blue | na |
| chrUn | 5663545 | 5664046 | 502 SAT1_CF  | blue | na |
| chrUn | 5664086 | 5665178 | 1093 SAT1_CF | blue | na |
| chrUn | 5665205 | 5665707 | 503 SAT1_CF  | blue | na |
| chrUn | 5665773 | 5665909 | 137 SAT1_CF  | blue | na |
| chrUn | 5665924 | 5666447 | 524 SAT1_CF  | blue | na |
| chrUn | 5666527 | 5667583 | 1057 SAT1_CF | blue | na |
| chrUn | 5667700 | 5668024 | 325 SAT1_CF  | blue | na |
| chrUn | 5668037 | 5669289 | 1253 SAT1_CF | blue | na |
| chrUn | 5669302 | 5669804 | 503 SAT1_CF  | blue | na |
| chrUn | 5669844 | 5670245 | 402 SAT1_CF  | blue | na |
| chrUn | 5670258 | 5670799 | 542 SAT1_CF  | blue | na |
| chrUn | 5670815 | 5671354 | 540 SAT1_CF  | blue | na |
| chrUn | 5671433 | 5672917 | 1485 SAT1_CF | blue | na |
| chrUn | 5672967 | 5673470 | 504 SAT1_CF  | blue | na |
| chrUn | 5673549 | 5674330 | 782 SAT1_CF  | blue | na |
| chrUn | 5674372 | 5675102 | 731 SAT1_CF  | blue | na |
| chrUn | 5675130 | 5675927 | 798 SAT1_CF  | blue | na |
| chrUn | 5675939 | 5676492 | 554 SAT1_CF  | blue | na |
| chrUn | 5676514 | 5676621 | 108 SAT1_CF  | blue | na |
| chrUn | 5676634 | 5677152 | 519 SAT1_CF  | blue | na |
| chrUn | 5677171 | 5677575 | 405 SAT1_CF  | blue | na |
| chrUn | 5677589 | 5678095 | 507 SAT1_CF  | blue | na |
| chrUn | 5678126 | 5678383 | 258 SAT1_CF  | blue | na |
| chrUn | 5684137 | 5684941 | 805 SAT1_CF  | blue | na |
| chrUn | 5684984 | 5685644 | 661 SAT1_CF  | blue | na |
| chrUn | 5685657 | 5686205 | 549 SAT1_CF  | blue | na |
| chrUn | 5686249 | 5686798 | 550 SAT1_CF  | blue | na |
| chrUn | 5686898 | 5687084 | 187 SAT1_CF  | blue | na |
| chrUn | 5687095 | 5687733 | 639 SAT1_CF  | blue | na |
| chrUn | 5687747 | 5688506 | 760 SAT1_CF  | blue | na |
| chrUn | 5688519 | 5689082 | 564 SAT1_CF  | blue | na |
| chrUn | 5689121 | 5689839 | 719 SAT1_CF  | blue | na |
| chrUn | 5689882 | 5690554 | 673 SAT1_CF  | blue | na |

|       |         |         |              |      |    |
|-------|---------|---------|--------------|------|----|
| chrUn | 5690572 | 5691111 | 540 SAT1_CF  | blue | na |
| chrUn | 5691159 | 5691835 | 677 SAT1_CF  | blue | na |
| chrUn | 5691847 | 5692445 | 599 SAT1_CF  | blue | na |
| chrUn | 5692462 | 5693493 | 1032 SAT1_CF | blue | na |
| chrUn | 5693536 | 5694177 | 642 SAT1_CF  | blue | na |
| chrUn | 5694195 | 5694857 | 663 SAT1_CF  | blue | na |
| chrUn | 5694880 | 5695562 | 683 SAT1_CF  | blue | na |
| chrUn | 5695582 | 5696076 | 495 SAT1_CF  | blue | na |
| chrUn | 5696116 | 5696517 | 402 SAT1_CF  | blue | na |
| chrUn | 5696532 | 5696764 | 233 SAT1_CF  | blue | na |
| chrUn | 5696785 | 5697802 | 1018 SAT1_CF | blue | na |
| chrUn | 5697846 | 5698520 | 675 SAT1_CF  | blue | na |
| chrUn | 5698532 | 5699291 | 760 SAT1_CF  | blue | na |
| chrUn | 5699304 | 5700064 | 761 SAT1_CF  | blue | na |
| chrUn | 5700084 | 5700578 | 495 SAT1_CF  | blue | na |
| chrUn | 5700626 | 5701147 | 522 SAT1_CF  | blue | na |
| chrUn | 5701207 | 5701874 | 668 SAT1_CF  | blue | na |
| chrUn | 5701896 | 5702567 | 672 SAT1_CF  | blue | na |
| chrUn | 5702593 | 5703074 | 482 SAT1_CF  | blue | na |
| chrUn | 5703160 | 5703297 | 138 SAT1_CF  | blue | na |
| chrUn | 5703325 | 5703874 | 550 SAT1_CF  | blue | na |
| chrUn | 5703954 | 5704515 | 562 SAT1_CF  | blue | na |
| chrUn | 5704543 | 5705174 | 632 SAT1_CF  | blue | na |
| chrUn | 5705217 | 5705753 | 537 SAT1_CF  | blue | na |
| chrUn | 5705774 | 5706447 | 674 SAT1_CF  | blue | na |
| chrUn | 5706469 | 5707035 | 567 SAT1_CF  | blue | na |
| chrUn | 5707141 | 5707495 | 355 SAT1_CF  | blue | na |
| chrUn | 5707509 | 5708017 | 509 SAT1_CF  | blue | na |
| chrUn | 5708096 | 5708877 | 782 SAT1_CF  | blue | na |
| chrUn | 5708927 | 5709780 | 854 SAT1_CF  | blue | na |
| chrUn | 5709792 | 5710475 | 684 SAT1_CF  | blue | na |
| chrUn | 5710488 | 5710664 | 177 SAT1_CF  | blue | na |
| chrUn | 5710678 | 5713972 | 3295 SAT1_CF | blue | na |
| chrUn | 5714000 | 5714632 | 633 SAT1_CF  | blue | na |
| chrUn | 5714675 | 5715340 | 666 SAT1_CF  | blue | na |
| chrUn | 5715353 | 5715854 | 502 SAT1_CF  | blue | na |
| chrUn | 5715894 | 5716816 | 923 SAT1_CF  | blue | na |
| chrUn | 5716835 | 5717557 | 723 SAT1_CF  | blue | na |
| chrUn | 5717605 | 5718280 | 676 SAT1_CF  | blue | na |
| chrUn | 5718298 | 5718779 | 482 SAT1_CF  | blue | na |
| chrUn | 5718839 | 5719241 | 403 SAT1_CF  | blue | na |
| chrUn | 5719252 | 5720914 | 1663 SAT1_CF | blue | na |

|       |         |         |              |      |    |
|-------|---------|---------|--------------|------|----|
| chrUn | 5720957 | 5722340 | 1384 SAT1_CF | blue | na |
| chrUn | 5722358 | 5723122 | 765 SAT1_CF  | blue | na |
| chrUn | 5723253 | 5723934 | 682 SAT1_CF  | blue | na |
| chrUn | 5723947 | 5724449 | 503 SAT1_CF  | blue | na |
| chrUn | 5724495 | 5726562 | 2068 SAT1_CF | blue | na |
| chrUn | 5726605 | 5727281 | 677 SAT1_CF  | blue | na |
| chrUn | 5727293 | 5727894 | 602 SAT1_CF  | blue | na |
| chrUn | 5727907 | 5728426 | 520 SAT1_CF  | blue | na |
| chrUn | 5728494 | 5728848 | 355 SAT1_CF  | blue | na |
| chrUn | 5728859 | 5729406 | 548 SAT1_CF  | blue | na |
| chrUn | 5729485 | 5730800 | 1316 SAT1_CF | blue | na |
| chrUn | 5730814 | 5731315 | 502 SAT1_CF  | blue | na |
| chrUn | 5731328 | 5731934 | 607 SAT1_CF  | blue | na |
| chrUn | 5733311 | 5735543 | 2233 SAT1_CF | blue | na |
| chrUn | 5735557 | 5736047 | 491 SAT1_CF  | blue | na |
| chrUn | 5736061 | 5737239 | 1179 SAT1_CF | blue | na |
| chrUn | 5737257 | 5737756 | 500 SAT1_CF  | blue | na |
| chrUn | 5737796 | 5739642 | 1847 SAT1_CF | blue | na |
| chrUn | 5739684 | 5741477 | 1794 SAT1_CF | blue | na |
| chrUn | 5741522 | 5743767 | 2246 SAT1_CF | blue | na |
| chrUn | 5743855 | 5744381 | 527 SAT1_CF  | blue | na |
| chrUn | 5745795 | 5747630 | 1836 SAT1_CF | blue | na |
| chrUn | 5747642 | 5748134 | 493 SAT1_CF  | blue | na |
| chrUn | 5748145 | 5748828 | 684 SAT1_CF  | blue | na |
| chrUn | 5748841 | 5749633 | 793 SAT1_CF  | blue | na |
| chrUn | 5749646 | 5750889 | 1244 SAT1_CF | blue | na |
| chrUn | 5750918 | 5751590 | 673 SAT1_CF  | blue | na |
| chrUn | 5751657 | 5752616 | 960 SAT1_CF  | blue | na |
| chrUn | 5752659 | 5753340 | 682 SAT1_CF  | blue | na |
| chrUn | 5753351 | 5754109 | 759 SAT1_CF  | blue | na |
| chrUn | 5754121 | 5754615 | 495 SAT1_CF  | blue | na |
| chrUn | 5754668 | 5756653 | 1986 SAT1_CF | blue | na |
| chrUn | 5756696 | 5758063 | 1368 SAT1_CF | blue | na |
| chrUn | 5758076 | 5758619 | 544 SAT1_CF  | blue | na |
| chrUn | 5758636 | 5758846 | 211 SAT1_CF  | blue | na |
| chrUn | 5758865 | 5758940 | 76 SAT1_CF   | blue | na |
| chrUn | 5758953 | 5759455 | 503 SAT1_CF  | blue | na |
| chrUn | 5759495 | 5760456 | 962 SAT1_CF  | blue | na |
| chrUn | 5760535 | 5760842 | 308 SAT1_CF  | blue | na |
| chrUn | 5760880 | 5762077 | 1198 SAT1_CF | blue | na |
| chrUn | 5762099 | 5762900 | 802 SAT1_CF  | blue | na |
| chrUn | 5762914 | 5763434 | 521 SAT1_CF  | blue | na |

|       |         |         |              |      |    |
|-------|---------|---------|--------------|------|----|
| chrUn | 5763460 | 5763615 | 156 SAT1_CF  | blue | na |
| chrUn | 5763645 | 5764153 | 509 SAT1_CF  | blue | na |
| chrUn | 5764185 | 5765424 | 1240 SAT1_CF | blue | na |
| chrUn | 5765450 | 5765606 | 157 SAT1_CF  | blue | na |
| chrUn | 5765621 | 5767484 | 1864 SAT1_CF | blue | na |
| chrUn | 5767528 | 5768074 | 547 SAT1_CF  | blue | na |
| chrUn | 5768094 | 5768203 | 110 SAT1_CF  | blue | na |
| chrUn | 5768215 | 5769468 | 1254 SAT1_CF | blue | na |
| chrUn | 5769527 | 5770459 | 933 SAT1_CF  | blue | na |
| chrUn | 5770470 | 5771568 | 1099 SAT1_CF | blue | na |
| chrUn | 5771611 | 5772285 | 675 SAT1_CF  | blue | na |
| chrUn | 5772297 | 5772902 | 606 SAT1_CF  | blue | na |
| chrUn | 5772915 | 5773435 | 521 SAT1_CF  | blue | na |
| chrUn | 5773503 | 5773853 | 351 SAT1_CF  | blue | na |
| chrUn | 5773866 | 5774373 | 508 SAT1_CF  | blue | na |
| chrUn | 5774404 | 5775308 | 905 SAT1_CF  | blue | na |
| chrUn | 5775350 | 5775521 | 172 SAT1_CF  | blue | na |
| chrUn | 5775533 | 5776210 | 678 SAT1_CF  | blue | na |
| chrUn | 5776222 | 5776974 | 753 SAT1_CF  | blue | na |
| chrUn | 5776999 | 5777494 | 496 SAT1_CF  | blue | na |
| chrUn | 5777566 | 5777695 | 130 SAT1_CF  | blue | na |
| chrUn | 5777710 | 5778234 | 525 SAT1_CF  | blue | na |
| chrUn | 5778268 | 5779319 | 1052 SAT1_CF | blue | na |
| chrUn | 5779331 | 5780047 | 717 SAT1_CF  | blue | na |
| chrUn | 5780058 | 5781336 | 1279 SAT1_CF | blue | na |
| chrUn | 5781358 | 5781467 | 110 SAT1_CF  | blue | na |
| chrUn | 5781478 | 5781959 | 482 SAT1_CF  | blue | na |
| chrUn | 5782019 | 5784060 | 2042 SAT1_CF | blue | na |
| chrUn | 5784103 | 5784777 | 675 SAT1_CF  | blue | na |
| chrUn | 5784789 | 5785550 | 762 SAT1_CF  | blue | na |
| chrUn | 5785568 | 5787130 | 1563 SAT1_CF | blue | na |
| chrUn | 5787144 | 5787823 | 680 SAT1_CF  | blue | na |
| chrUn | 5787837 | 5788338 | 502 SAT1_CF  | blue | na |
| chrUn | 5788398 | 5788540 | 143 SAT1_CF  | blue | na |
| chrUn | 5788555 | 5789079 | 525 SAT1_CF  | blue | na |
| chrUn | 5789122 | 5789634 | 513 SAT1_CF  | blue | na |
| chrUn | 5789668 | 5790881 | 1214 SAT1_CF | blue | na |
| chrUn | 5790903 | 5791477 | 575 SAT1_CF  | blue | na |
| chrUn | 5791498 | 5791601 | 104 SAT1_CF  | blue | na |
| chrUn | 5791619 | 5792125 | 507 SAT1_CF  | blue | na |
| chrUn | 5792167 | 5792492 | 326 SAT1_CF  | blue | na |
| chrUn | 5792538 | 5793732 | 1195 SAT1_CF | blue | na |

|       |         |         |              |      |    |
|-------|---------|---------|--------------|------|----|
| chrUn | 5793819 | 5796034 | 2216 SAT1_CF | blue | na |
| chrUn | 5796077 | 5796743 | 667 SAT1_CF  | blue | na |
| chrUn | 5796756 | 5798237 | 1482 SAT1_CF | blue | na |
| chrUn | 5798280 | 5798954 | 675 SAT1_CF  | blue | na |
| chrUn | 5798966 | 5799728 | 763 SAT1_CF  | blue | na |
| chrUn | 5799746 | 5801308 | 1563 SAT1_CF | blue | na |
| chrUn | 5801322 | 5801990 | 669 SAT1_CF  | blue | na |
| chrUn | 5802023 | 5802560 | 538 SAT1_CF  | blue | na |
| chrUn | 5802603 | 5803147 | 545 SAT1_CF  | blue | na |
| chrUn | 5803204 | 5803868 | 665 SAT1_CF  | blue | na |
| chrUn | 5803881 | 5804383 | 503 SAT1_CF  | blue | na |
| chrUn | 5804423 | 5805353 | 931 SAT1_CF  | blue | na |
| chrUn | 5805373 | 5807746 | 2374 SAT1_CF | blue | na |
| chrUn | 5807767 | 5807863 | 97 SAT1_CF   | blue | na |
| chrUn | 5807885 | 5808099 | 215 SAT1_CF  | blue | na |
| chrUn | 5812768 | 5813314 | 547 SAT1_CF  | blue | na |
| chrUn | 5813358 | 5814357 | 1000 SAT1_CF | blue | na |
| chrUn | 5814418 | 5815094 | 677 SAT1_CF  | blue | na |
| chrUn | 5815106 | 5815790 | 685 SAT1_CF  | blue | na |
| chrUn | 5815803 | 5816502 | 700 SAT1_CF  | blue | na |
| chrUn | 5816530 | 5817040 | 511 SAT1_CF  | blue | na |
| chrUn | 5817109 | 5817832 | 724 SAT1_CF  | blue | na |
| chrUn | 5817844 | 5818534 | 691 SAT1_CF  | blue | na |
| chrUn | 5818578 | 5819099 | 522 SAT1_CF  | blue | na |
| chrUn | 5819133 | 5820206 | 1074 SAT1_CF | blue | na |
| chrUn | 5820249 | 5820794 | 546 SAT1_CF  | blue | na |
| chrUn | 5820815 | 5820923 | 109 SAT1_CF  | blue | na |
| chrUn | 5820936 | 5821455 | 520 SAT1_CF  | blue | na |
| chrUn | 5821524 | 5821878 | 355 SAT1_CF  | blue | na |
| chrUn | 5821892 | 5822498 | 607 SAT1_CF  | blue | na |
| chrUn | 5822518 | 5824447 | 1930 SAT1_CF | blue | na |
| chrUn | 5824460 | 5824941 | 482 SAT1_CF  | blue | na |
| chrUn | 5825018 | 5826735 | 1718 SAT1_CF | blue | na |
| chrUn | 5826782 | 5827633 | 852 SAT1_CF  | blue | na |
| chrUn | 5827675 | 5828844 | 1170 SAT1_CF | blue | na |
| chrUn | 5828865 | 5829432 | 568 SAT1_CF  | blue | na |
| chrUn | 5829517 | 5829654 | 138 SAT1_CF  | blue | na |
| chrUn | 5829686 | 5830371 | 686 SAT1_CF  | blue | na |
| chrUn | 5830382 | 5830926 | 545 SAT1_CF  | blue | na |
| chrUn | 5831022 | 5832175 | 1154 SAT1_CF | blue | na |
| chrUn | 5832228 | 5832304 | 77 SAT1_CF   | blue | na |
| chrUn | 5832317 | 5832838 | 522 SAT1_CF  | blue | na |

|       |         |         |              |      |    |
|-------|---------|---------|--------------|------|----|
| chrUn | 5832859 | 5833260 | 402 SAT1_CF  | blue | na |
| chrUn | 5833271 | 5834899 | 1629 SAT1_CF | blue | na |
| chrUn | 5834942 | 5835616 | 675 SAT1_CF  | blue | na |
| chrUn | 5835629 | 5836113 | 485 SAT1_CF  | blue | na |
| chrUn | 5836181 | 5838123 | 1943 SAT1_CF | blue | na |
| chrUn | 5838180 | 5838673 | 494 SAT1_CF  | blue | na |
| chrUn | 5838701 | 5839245 | 545 SAT1_CF  | blue | na |
| chrUn | 5839288 | 5839955 | 668 SAT1_CF  | blue | na |
| chrUn | 5839977 | 5841034 | 1058 SAT1_CF | blue | na |
| chrUn | 5841077 | 5842340 | 1264 SAT1_CF | blue | na |
| chrUn | 5842352 | 5843485 | 1134 SAT1_CF | blue | na |
| chrUn | 5843581 | 5843717 | 137 SAT1_CF  | blue | na |
| chrUn | 5843732 | 5844771 | 1040 SAT1_CF | blue | na |
| chrUn | 5844824 | 5844900 | 77 SAT1_CF   | blue | na |
| chrUn | 5844913 | 5845414 | 502 SAT1_CF  | blue | na |
| chrUn | 5845453 | 5845855 | 403 SAT1_CF  | blue | na |
| chrUn | 5845866 | 5848170 | 2305 SAT1_CF | blue | na |
| chrUn | 5848182 | 5848814 | 633 SAT1_CF  | blue | na |
| chrUn | 5848870 | 5849638 | 769 SAT1_CF  | blue | na |
| chrUn | 5849651 | 5851029 | 1379 SAT1_CF | blue | na |
| chrUn | 5851041 | 5851813 | 773 SAT1_CF  | blue | na |
| chrUn | 5851893 | 5852562 | 670 SAT1_CF  | blue | na |
| chrUn | 5852575 | 5853096 | 522 SAT1_CF  | blue | na |
| chrUn | 5853143 | 5853279 | 137 SAT1_CF  | blue | na |
| chrUn | 5853344 | 5853973 | 630 SAT1_CF  | blue | na |
| chrUn | 5854009 | 5854973 | 965 SAT1_CF  | blue | na |
| chrUn | 5855016 | 5855688 | 673 SAT1_CF  | blue | na |
| chrUn | 5855700 | 5856462 | 763 SAT1_CF  | blue | na |
| chrUn | 5856480 | 5858040 | 1561 SAT1_CF | blue | na |
| chrUn | 5858054 | 5858725 | 672 SAT1_CF  | blue | na |
| chrUn | 5858747 | 5859291 | 545 SAT1_CF  | blue | na |
| chrUn | 5859334 | 5860524 | 1191 SAT1_CF | blue | na |
| chrUn | 5860537 | 5861555 | 1019 SAT1_CF | blue | na |
| chrUn | 5861637 | 5862185 | 549 SAT1_CF  | blue | na |
| chrUn | 5862199 | 5863080 | 882 SAT1_CF  | blue | na |
| chrUn | 5863123 | 5863669 | 547 SAT1_CF  | blue | na |
| chrUn | 5863730 | 5866460 | 2731 SAT1_CF | blue | na |
| chrUn | 5866471 | 5866964 | 494 SAT1_CF  | blue | na |
| chrUn | 5867004 | 5867406 | 403 SAT1_CF  | blue | na |
| chrUn | 5867440 | 5869151 | 1712 SAT1_CF | blue | na |
| chrUn | 5869186 | 5869665 | 480 SAT1_CF  | blue | na |
| chrUn | 5869691 | 5870757 | 1067 SAT1_CF | blue | na |

|       |         |         |              |      |    |
|-------|---------|---------|--------------|------|----|
| chrUn | 5870775 | 5871256 | 482 SAT1_CF  | blue | na |
| chrUn | 5871323 | 5871839 | 517 SAT1_CF  | blue | na |
| chrUn | 5871872 | 5873129 | 1258 SAT1_CF | blue | na |
| chrUn | 5873171 | 5873792 | 622 SAT1_CF  | blue | na |
| chrUn | 5873836 | 5875462 | 1627 SAT1_CF | blue | na |
| chrUn | 5875505 | 5876178 | 674 SAT1_CF  | blue | na |
| chrUn | 5876190 | 5876356 | 167 SAT1_CF  | blue | na |
| chrUn | 5876374 | 5876856 | 483 SAT1_CF  | blue | na |
| chrUn | 5876962 | 5877835 | 874 SAT1_CF  | blue | na |
| chrUn | 5877846 | 5878189 | 344 SAT1_CF  | blue | na |
| chrUn | 5878234 | 5879652 | 1419 SAT1_CF | blue | na |
| chrUn | 5879664 | 5880446 | 783 SAT1_CF  | blue | na |
| chrUn | 5880459 | 5881866 | 1408 SAT1_CF | blue | na |
| chrUn | 5881909 | 5882584 | 676 SAT1_CF  | blue | na |
| chrUn | 5882596 | 5883279 | 684 SAT1_CF  | blue | na |
| chrUn | 5883292 | 5884815 | 1524 SAT1_CF | blue | na |
| chrUn | 5884871 | 5885455 | 585 SAT1_CF  | blue | na |
| chrUn | 5885495 | 5886429 | 935 SAT1_CF  | blue | na |
| chrUn | 5886461 | 5887532 | 1072 SAT1_CF | blue | na |
| chrUn | 5887575 | 5888249 | 675 SAT1_CF  | blue | na |
| chrUn | 5888261 | 5889641 | 1381 SAT1_CF | blue | na |
| chrUn | 5889659 | 5890181 | 523 SAT1_CF  | blue | na |
| chrUn | 5890247 | 5890357 | 111 SAT1_CF  | blue | na |
| chrUn | 5890381 | 5890901 | 521 SAT1_CF  | blue | na |
| chrUn | 5890969 | 5891882 | 914 SAT1_CF  | blue | na |
| chrUn | 5891998 | 5893646 | 1649 SAT1_CF | blue | na |
| chrUn | 5893659 | 5894416 | 758 SAT1_CF  | blue | na |
| chrUn | 5894429 | 5896897 | 2469 SAT1_CF | blue | na |
| chrUn | 5896940 | 5898441 | 1502 SAT1_CF | blue | na |
| chrUn | 5898460 | 5901249 | 2790 SAT1_CF | blue | na |
| chrUn | 5901261 | 5901863 | 603 SAT1_CF  | blue | na |
| chrUn | 5901876 | 5902395 | 520 SAT1_CF  | blue | na |
| chrUn | 5902419 | 5904477 | 2059 SAT1_CF | blue | na |
| chrUn | 5904519 | 5905889 | 1371 SAT1_CF | blue | na |
| chrUn | 5905902 | 5907876 | 1975 SAT1_CF | blue | na |
| chrUn | 5907898 | 5908393 | 496 SAT1_CF  | blue | na |
| chrUn | 5908433 | 5909357 | 925 SAT1_CF  | blue | na |
| chrUn | 5909436 | 5910397 | 962 SAT1_CF  | blue | na |
| chrUn | 5910439 | 5911116 | 678 SAT1_CF  | blue | na |
| chrUn | 5911128 | 5911803 | 676 SAT1_CF  | blue | na |
| chrUn | 5911828 | 5912322 | 495 SAT1_CF  | blue | na |
| chrUn | 5912335 | 5912914 | 580 SAT1_CF  | blue | na |

|       |         |         |      |         |        |    |
|-------|---------|---------|------|---------|--------|----|
| chrUn | 5912932 | 5913180 | 249  | CarSat1 | red    | na |
| chrUn | 5913225 | 5915065 | 1841 | CarSat1 | red    | na |
| chrUn | 5915095 | 5917275 | 2181 | CarSat1 | red    | na |
| chrUn | 5917305 | 5918013 | 709  | CarSat1 | red    | na |
| chrUn | 5918028 | 5918154 | 127  | Carsat2 | orange | na |
| chrUn | 5918043 | 5919110 | 1068 | CarSat1 | red    | na |
| chrUn | 5920301 | 5921474 | 1174 | CarSat1 | red    | na |
| chrUn | 5921504 | 5921565 | 62   | CarSat1 | red    | na |
| chrUn | 5921776 | 5922440 | 665  | CarSat1 | red    | na |
| chrUn | 5922470 | 5924919 | 2450 | CarSat1 | red    | na |
| chrUn | 5925129 | 5925588 | 460  | CarSat1 | red    | na |
| chrUn | 5925603 | 5925729 | 127  | Carsat2 | orange | na |
| chrUn | 5925618 | 5926324 | 707  | CarSat1 | red    | na |
| chrUn | 5926339 | 5926465 | 127  | Carsat2 | orange | na |
| chrUn | 5926354 | 5927064 | 711  | CarSat1 | red    | na |
| chrUn | 5927094 | 5928542 | 1449 | CarSat1 | red    | na |
| chrUn | 5928572 | 5930340 | 1769 | CarSat1 | red    | na |
| chrUn | 5930913 | 5931481 | 569  | CarSat1 | red    | na |
| chrUn | 5931511 | 5932222 | 712  | CarSat1 | red    | na |
| chrUn | 5932237 | 5932363 | 127  | Carsat2 | orange | na |
| chrUn | 5932252 | 5934435 | 2184 | CarSat1 | red    | na |
| chrUn | 5934465 | 5935174 | 710  | CarSat1 | red    | na |
| chrUn | 5935189 | 5935315 | 127  | Carsat2 | orange | na |
| chrUn | 5935204 | 5937161 | 1958 | CarSat1 | red    | na |
| chrUn | 5937185 | 5938125 | 941  | CarSat1 | red    | na |
| chrUn | 5938155 | 5938866 | 712  | CarSat1 | red    | na |
| chrUn | 5938881 | 5939007 | 127  | Carsat2 | orange | na |
| chrUn | 5938896 | 5939381 | 486  | CarSat1 | red    | na |
| chrUn | 5939405 | 5942561 | 3157 | CarSat1 | red    | na |
| chrUn | 5942591 | 5944770 | 2180 | CarSat1 | red    | na |
| chrUn | 5944800 | 5945511 | 712  | CarSat1 | red    | na |
| chrUn | 5945526 | 5945653 | 128  | Carsat2 | orange | na |
| chrUn | 5945541 | 5946249 | 709  | CarSat1 | red    | na |
| chrUn | 5946279 | 5946989 | 711  | CarSat1 | red    | na |
| chrUn | 5947004 | 5947131 | 128  | Carsat2 | orange | na |
| chrUn | 5947019 | 5947726 | 708  | CarSat1 | red    | na |
| chrUn | 5947756 | 5948461 | 706  | CarSat1 | red    | na |
| chrUn | 5948476 | 5948602 | 127  | Carsat2 | orange | na |
| chrUn | 5948491 | 5949708 | 1218 | CarSat1 | red    | na |
| chrUn | 5949852 | 5950822 | 971  | CarSat1 | red    | na |
| chrUn | 5950837 | 5950963 | 127  | Carsat2 | orange | na |
| chrUn | 5950852 | 5952296 | 1445 | CarSat1 | red    | na |



|       |         |         |      |         |        |    |
|-------|---------|---------|------|---------|--------|----|
| chrUn | 5952326 | 5953767 | 1442 | CarSat1 | red    | na |
| chrUn | 5953782 | 5953907 | 126  | Carsat2 | orange | na |
| chrUn | 5953797 | 5955243 | 1447 | CarSat1 | red    | na |
| chrUn | 5955273 | 5955980 | 708  | CarSat1 | red    | na |
| chrUn | 5955995 | 5956109 | 115  | Carsat2 | orange | na |
| chrUn | 5956010 | 5956494 | 485  | CarSat1 | red    | na |
| chrUn | 5956527 | 5957462 | 936  | CarSat1 | red    | na |
| chrUn | 5957477 | 5957604 | 128  | Carsat2 | orange | na |
| chrUn | 5957492 | 5958189 | 698  | CarSat1 | red    | na |
| chrUn | 5958213 | 5958339 | 127  | Carsat2 | orange | na |
| chrUn | 5958228 | 5959768 | 1541 | CarSat1 | red    | na |
| chrUn | 5982639 | 5983451 | 813  | Sat2CF  | purple | na |
| chrUn | 5982652 | 5983375 | 724  | Sat2CF  | purple | na |
| chrUn | 5982808 | 5983373 | 566  | Sat2CF  | purple | na |
| chrUn | 6000677 | 6001828 | 1152 | Sat2CF  | purple | na |
| chrUn | 6019870 | 6020052 | 183  | Sat2CF  | purple | na |
| chrUn | 6019926 | 6021079 | 1154 | Sat2CF  | purple | na |
| chrUn | 6043403 | 6043527 | 125  | Sat2CF  | purple | na |
| chrUn | 6043419 | 6044217 | 799  | Sat2CF  | purple | na |
| chrUn | 6044106 | 6044244 | 139  | Sat2CF  | purple | na |
| chrUn | 6067010 | 6068117 | 1108 | Sat2CF  | purple | na |
| chrUn | 6098702 | 6098866 | 165  | Sat2CF  | purple | na |
| chrUn | 6098721 | 6099887 | 1167 | Sat2CF  | purple | na |
| chrUn | 6120043 | 6120167 | 125  | Sat2CF  | purple | na |
| chrUn | 6120059 | 6120856 | 798  | Sat2CF  | purple | na |
| chrUn | 6120745 | 6120883 | 139  | Sat2CF  | purple | na |
| chrUn | 6120745 | 6120883 | 139  | Sat2CF  | purple | na |
| chrUn | 6148530 | 6148879 | 350  | Sat2CF  | purple | na |
| chrUn | 6148627 | 6148943 | 317  | Sat2CF  | purple | na |
| chrUn | 6161810 | 6162813 | 1004 | Sat2CF  | purple | na |
| chrUn | 6186449 | 6186637 | 189  | Sat2CF  | purple | na |
| chrUn | 6186479 | 6187657 | 1179 | Sat2CF  | purple | na |
| chrUn | 6216941 | 6217785 | 845  | Sat2CF  | purple | na |
| chrUn | 6229841 | 6231061 | 1221 | Sat2CF  | purple | na |
| chrUn | 6243870 | 6244038 | 169  | Sat2CF  | purple | na |
| chrUn | 6243907 | 6244738 | 832  | Sat2CF  | purple | na |
| chrUn | 6243928 | 6244654 | 727  | Sat2CF  | purple | na |
| chrUn | 6259808 | 6259996 | 189  | Sat2CF  | purple | na |
| chrUn | 6259867 | 6261087 | 1221 | Sat2CF  | purple | na |
| chrUn | 6408822 | 6409023 | 202  | Sat2CF  | purple | na |
| chrUn | 6408863 | 6410038 | 1176 | Sat2CF  | purple | na |
| chrUn | 6432172 | 6432645 | 474  | Sat2CF  | purple | na |

|       |         |         |             |        |    |
|-------|---------|---------|-------------|--------|----|
| chrUn | 6432223 | 6433385 | 1163 Sat2CF | purple | na |
| chrUn | 6447428 | 6447621 | 194 Sat2CF  | purple | na |
| chrUn | 6447457 | 6447621 | 165 Sat2CF  | purple | na |
| chrUn | 6447474 | 6447616 | 143 Sat2CF  | purple | na |
| chrUn | 6470357 | 6471536 | 1180 Sat2CF | purple | na |
| chrUn | 6497983 | 6499167 | 1185 Sat2CF | purple | na |
| chrUn | 6509426 | 6509592 | 167 Sat2CF  | purple | na |
| chrUn | 6509484 | 6510653 | 1170 Sat2CF | purple | na |
| chrUn | 6523294 | 6524132 | 839 Sat2CF  | purple | na |
| chrUn | 6523355 | 6524081 | 727 Sat2CF  | purple | na |
| chrUn | 6523297 | 6523667 | 371 Sat2CF  | purple | na |
| chrUn | 6523988 | 6524152 | 165 Sat2CF  | purple | na |
| chrUn | 6538948 | 6540188 | 1241 Sat2CF | purple | na |
| chrUn | 6552315 | 6553466 | 1152 Sat2CF | purple | na |
| chrUn | 6559789 | 6559966 | 178 Sat2CF  | purple | na |
| chrUn | 6559802 | 6559960 | 159 Sat2CF  | purple | na |
| chrUn | 6559857 | 6559979 | 123 Sat2CF  | purple | na |
| chrUn | 6573620 | 6574433 | 814 Sat2CF  | purple | na |
| chrUn | 6573705 | 6574972 | 1268 Sat2CF | purple | na |
| chrUn | 6590242 | 6590391 | 150 Sat2CF  | purple | na |
| chrUn | 6590283 | 6591484 | 1202 Sat2CF | purple | na |
| chrUn | 6612483 | 6613293 | 811 Sat2CF  | purple | na |
| chrUn | 6612570 | 6613437 | 868 Sat2CF  | purple | na |
| chrUn | 6661778 | 6662578 | 801 Sat2CF  | purple | na |
| chrUn | 6690424 | 6691095 | 672 Sat2CF  | purple | na |
| chrUn | 6690495 | 6691343 | 849 Sat2CF  | purple | na |
| chrUn | 6691207 | 6691369 | 163 Sat2CF  | purple | na |
| chrUn | 6708409 | 6709147 | 739 Sat2CF  | purple | na |
| chrUn | 6708411 | 6709073 | 663 Sat2CF  | purple | na |
| chrUn | 6729363 | 6730316 | 954 Sat2CF  | purple | na |
| chrUn | 6729443 | 6730181 | 739 Sat2CF  | purple | na |
| chrUn | 6747563 | 6748698 | 1136 Sat2CF | purple | na |
| chrUn | 6766726 | 6767528 | 803 Sat2CF  | purple | na |
| chrUn | 6766747 | 6767452 | 706 Sat2CF  | purple | na |
| chrUn | 6790730 | 6790931 | 202 Sat2CF  | purple | na |
| chrUn | 6790771 | 6791945 | 1175 Sat2CF | purple | na |
| chrUn | 6814640 | 6814789 | 150 Sat2CF  | purple | na |
| chrUn | 6814660 | 6815877 | 1218 Sat2CF | purple | na |
| chrUn | 6814665 | 6815749 | 1085 Sat2CF | purple | na |
| chrUn | 6814640 | 6814789 | 150 Sat2CF  | purple | na |
| chrUn | 6864498 | 6864621 | 124 Sat2CF  | purple | na |
| chrUn | 6864514 | 6865284 | 771 Sat2CF  | purple | na |

|       |         |         |              |        |    |
|-------|---------|---------|--------------|--------|----|
| chrUn | 6865085 | 6865311 | 227 Sat2CF   | purple | na |
| chrUn | 6886871 | 6887221 | 351 Sat2CF   | purple | na |
| chrUn | 6886897 | 6887287 | 391 Sat2CF   | purple | na |
| chrUn | 6900157 | 6900334 | 178 Sat2CF   | purple | na |
| chrUn | 6900210 | 6901284 | 1075 Sat2CF  | purple | na |
| chrUn | 6921299 | 6922473 | 1175 Sat2CF  | purple | na |
| chrUn | 6950656 | 6951907 | 1252 Sat2CF  | purple | na |
| chrUn | 6950689 | 6951778 | 1090 Sat2CF  | purple | na |
| chrUn | 6966473 | 6967703 | 1231 Sat2CF  | purple | na |
| chrUn | 6981799 | 6982913 | 1115 Sat2CF  | purple | na |
| chrUn | 6988820 | 6990024 | 1205 CarSat1 | red    | na |
| chrUn | 6990193 | 6990347 | 155 CarSat1  | red    | na |
| chrUn | 6990363 | 6990489 | 127 Carsat2  | orange | na |
| chrUn | 6990377 | 6991084 | 708 CarSat1  | red    | na |
| chrUn | 6991114 | 6991674 | 561 CarSat1  | red    | na |
| chrUn | 6991859 | 6992015 | 157 CarSat1  | red    | na |
| chrUn | 6992045 | 6993342 | 1298 CarSat1 | red    | na |
| chrUn | 6993525 | 6993679 | 155 CarSat1  | red    | na |
| chrUn | 6993709 | 6994417 | 709 CarSat1  | red    | na |
| chrUn | 6994447 | 6995009 | 563 CarSat1  | red    | na |
| chrUn | 6995196 | 6995350 | 155 CarSat1  | red    | na |
| chrUn | 6995380 | 6996087 | 708 CarSat1  | red    | na |
| chrUn | 6996117 | 6996679 | 563 CarSat1  | red    | na |
| chrUn | 6996866 | 6997020 | 155 CarSat1  | red    | na |
| chrUn | 6997050 | 6997755 | 706 CarSat1  | red    | na |
| chrUn | 6997785 | 6998347 | 563 CarSat1  | red    | na |
| chrUn | 6998528 | 6998682 | 155 CarSat1  | red    | na |
| chrUn | 6998712 | 6999411 | 700 CarSat1  | red    | na |
| chrUn | 6999447 | 7000013 | 567 CarSat1  | red    | na |
| chrUn | 7000219 | 7000438 | 220 CarSat1  | red    | na |
| chrUn | 7000634 | 7000827 | 194 CarSat1  | red    | na |
| chrUn | 7000844 | 7001295 | 452 CarSat1  | red    | na |
| chrUn | 7001325 | 7001804 | 480 CarSat1  | red    | na |
| chrUn | 7002797 | 7003359 | 563 CarSat1  | red    | na |
| chrUn | 7003546 | 7003700 | 155 CarSat1  | red    | na |
| chrUn | 7003730 | 7005026 | 1297 CarSat1 | red    | na |
| chrUn | 7005208 | 7005458 | 251 CarSat1  | red    | na |
| chrUn | 7005650 | 7006306 | 657 CarSat1  | red    | na |
| chrUn | 7006336 | 7007043 | 708 CarSat1  | red    | na |
| chrUn | 7007058 | 7007181 | 124 Carsat2  | orange | na |
| chrUn | 7007073 | 7007818 | 746 CarSat1  | red    | na |
| chrUn | 7007832 | 7008869 | 1038 Sat2CF  | purple | na |

|       |         |         |              |        |    |
|-------|---------|---------|--------------|--------|----|
| chrUn | 7007952 | 7008806 | 855 Sat2CF   | purple | na |
| chrUn | 7027315 | 7027500 | 186 Sat2CF   | purple | na |
| chrUn | 7027346 | 7027983 | 638 Sat2CF   | purple | na |
| chrUn | 7027661 | 7028062 | 402 Sat2CF   | purple | na |
| chrUn | 7029236 | 7029989 | 754 SAT1_CF  | blue   | na |
| chrUn | 7030009 | 7030503 | 495 SAT1_CF  | blue   | na |
| chrUn | 7030543 | 7030940 | 398 SAT1_CF  | blue   | na |
| chrUn | 7030982 | 7032041 | 1060 SAT1_CF | blue   | na |
| chrUn | 7032054 | 7032730 | 677 SAT1_CF  | blue   | na |
| chrUn | 7032742 | 7033316 | 575 SAT1_CF  | blue   | na |
| chrUn | 7033458 | 7034289 | 832 SAT1_CF  | blue   | na |
| chrUn | 7034303 | 7034845 | 543 SAT1_CF  | blue   | na |
| chrUn | 7034858 | 7036480 | 1623 SAT1_CF | blue   | na |
| chrUn | 7036523 | 7037200 | 678 SAT1_CF  | blue   | na |
| chrUn | 7037212 | 7037713 | 502 SAT1_CF  | blue   | na |
| chrUn | 7037758 | 7037915 | 158 SAT1_CF  | blue   | na |
| chrUn | 7037948 | 7038454 | 507 SAT1_CF  | blue   | na |
| chrUn | 7038485 | 7039945 | 1461 SAT1_CF | blue   | na |
| chrUn | 7039957 | 7041081 | 1125 SAT1_CF | blue   | na |
| chrUn | 7041109 | 7041740 | 632 SAT1_CF  | blue   | na |
| chrUn | 7041783 | 7043216 | 1434 SAT1_CF | blue   | na |
| chrUn | 7043251 | 7043722 | 472 SAT1_CF  | blue   | na |
| chrUn | 7043782 | 7045161 | 1380 SAT1_CF | blue   | na |
| chrUn | 7045205 | 7046535 | 1331 SAT1_CF | blue   | na |
| chrUn | 7046549 | 7047230 | 682 SAT1_CF  | blue   | na |
| chrUn | 7047250 | 7047889 | 640 SAT1_CF  | blue   | na |
| chrUn | 7047902 | 7048830 | 929 SAT1_CF  | blue   | na |
| chrUn | 7048841 | 7049523 | 683 SAT1_CF  | blue   | na |
| chrUn | 7049535 | 7050166 | 632 SAT1_CF  | blue   | na |
| chrUn | 7050189 | 7050294 | 106 SAT1_CF  | blue   | na |
| chrUn | 7050307 | 7052003 | 1697 SAT1_CF | blue   | na |
| chrUn | 7052026 | 7052131 | 106 SAT1_CF  | blue   | na |
| chrUn | 7052144 | 7052663 | 520 SAT1_CF  | blue   | na |
| chrUn | 7052680 | 7052865 | 186 SAT1_CF  | blue   | na |
| chrUn | 7053048 | 7053250 | 203 SAT1_CF  | blue   | na |
| chrUn | 7053293 | 7053902 | 610 SAT1_CF  | blue   | na |
| chrUn | 7053922 | 7055081 | 1160 SAT1_CF | blue   | na |
| chrUn | 7055093 | 7055724 | 632 SAT1_CF  | blue   | na |
| chrUn | 7055795 | 7056336 | 542 SAT1_CF  | blue   | na |
| chrUn | 7056355 | 7056667 | 313 SAT1_CF  | blue   | na |
| chrUn | 7056745 | 7057308 | 564 SAT1_CF  | blue   | na |
| chrUn | 7057335 | 7058557 | 1223 SAT1_CF | blue   | na |

|       |         |         |              |      |    |
|-------|---------|---------|--------------|------|----|
| chrUn | 7058601 | 7059842 | 1242 SAT1_CF | blue | na |
| chrUn | 7059921 | 7060883 | 963 SAT1_CF  | blue | na |
| chrUn | 7060926 | 7061605 | 680 SAT1_CF  | blue | na |
| chrUn | 7061617 | 7062119 | 503 SAT1_CF  | blue | na |
| chrUn | 7062164 | 7062320 | 157 SAT1_CF  | blue | na |
| chrUn | 7062385 | 7063081 | 697 SAT1_CF  | blue | na |
| chrUn | 7063108 | 7063757 | 650 SAT1_CF  | blue | na |
| chrUn | 7063800 | 7064475 | 676 SAT1_CF  | blue | na |
| chrUn | 7064487 | 7065142 | 656 SAT1_CF  | blue | na |
| chrUn | 7065155 | 7065674 | 520 SAT1_CF  | blue | na |
| chrUn | 7065695 | 7067517 | 1823 SAT1_CF | blue | na |
| chrUn | 7067559 | 7068105 | 547 SAT1_CF  | blue | na |
| chrUn | 7068162 | 7068710 | 549 SAT1_CF  | blue | na |
| chrUn | 7068755 | 7071089 | 2335 SAT1_CF | blue | na |
| chrUn | 7071101 | 7071655 | 555 SAT1_CF  | blue | na |
| chrUn | 7071676 | 7071783 | 108 SAT1_CF  | blue | na |
| chrUn | 7071803 | 7072341 | 539 SAT1_CF  | blue | na |
| chrUn | 7072458 | 7073345 | 888 SAT1_CF  | blue | na |
| chrUn | 7073363 | 7073644 | 282 SAT1_CF  | blue | na |
| chrUn | 7073686 | 7074411 | 726 SAT1_CF  | blue | na |
| chrUn | 7074472 | 7075015 | 544 SAT1_CF  | blue | na |
| chrUn | 7075036 | 7075145 | 110 SAT1_CF  | blue | na |
| chrUn | 7075157 | 7076428 | 1272 SAT1_CF | blue | na |
| chrUn | 7076494 | 7076630 | 137 SAT1_CF  | blue | na |
| chrUn | 7076658 | 7077848 | 1191 SAT1_CF | blue | na |
| chrUn | 7077893 | 7079223 | 1331 SAT1_CF | blue | na |
| chrUn | 7079235 | 7079787 | 553 SAT1_CF  | blue | na |
| chrUn | 7079830 | 7080392 | 563 SAT1_CF  | blue | na |
| chrUn | 7080457 | 7081822 | 1366 SAT1_CF | blue | na |
| chrUn | 7081836 | 7082985 | 1150 SAT1_CF | blue | na |
| chrUn | 7083005 | 7083423 | 419 SAT1_CF  | blue | na |
| chrUn | 7083443 | 7083936 | 494 SAT1_CF  | blue | na |
| chrUn | 7083976 | 7084484 | 509 SAT1_CF  | blue | na |
| chrUn | 7086429 | 7087995 | 1567 SAT1_CF | blue | na |
| chrUn | 7088040 | 7089064 | 1025 SAT1_CF | blue | na |
| chrUn | 7089109 | 7090805 | 1697 SAT1_CF | blue | na |
| chrUn | 7090817 | 7091503 | 687 SAT1_CF  | blue | na |
| chrUn | 7091515 | 7092034 | 520 SAT1_CF  | blue | na |
| chrUn | 7092053 | 7092538 | 486 SAT1_CF  | blue | na |
| chrUn | 7092556 | 7093330 | 775 SAT1_CF  | blue | na |
| chrUn | 7093342 | 7093895 | 554 SAT1_CF  | blue | na |
| chrUn | 7093938 | 7095145 | 1208 SAT1_CF | blue | na |

|       |         |         |              |      |    |
|-------|---------|---------|--------------|------|----|
| chrUn | 7095157 | 7096088 | 932 SAT1_CF  | blue | na |
| chrUn | 7096148 | 7097107 | 960 SAT1_CF  | blue | na |
| chrUn | 7097151 | 7098152 | 1002 SAT1_CF | blue | na |
| chrUn | 7098195 | 7098864 | 670 SAT1_CF  | blue | na |
| chrUn | 7098882 | 7099971 | 1090 SAT1_CF | blue | na |
| chrUn | 7100011 | 7100413 | 403 SAT1_CF  | blue | na |
| chrUn | 7100431 | 7100943 | 513 SAT1_CF  | blue | na |
| chrUn | 7100964 | 7101904 | 941 SAT1_CF  | blue | na |
| chrUn | 7101922 | 7102465 | 544 SAT1_CF  | blue | na |
| chrUn | 7102547 | 7103088 | 542 SAT1_CF  | blue | na |
| chrUn | 7103124 | 7103527 | 404 SAT1_CF  | blue | na |
| chrUn | 7103538 | 7104220 | 683 SAT1_CF  | blue | na |
| chrUn | 7104234 | 7104712 | 479 SAT1_CF  | blue | na |
| chrUn | 7104771 | 7104953 | 183 SAT1_CF  | blue | na |
| chrUn | 7105133 | 7105900 | 768 SAT1_CF  | blue | na |
| chrUn | 7105932 | 7107887 | 1956 SAT1_CF | blue | na |
| chrUn | 7107900 | 7108400 | 501 SAT1_CF  | blue | na |
| chrUn | 7108440 | 7108840 | 401 SAT1_CF  | blue | na |
| chrUn | 7108851 | 7109398 | 548 SAT1_CF  | blue | na |
| chrUn | 7109455 | 7110440 | 986 SAT1_CF  | blue | na |
| chrUn | 7110483 | 7111157 | 675 SAT1_CF  | blue | na |
| chrUn | 7111169 | 7111855 | 687 SAT1_CF  | blue | na |
| chrUn | 7111867 | 7113196 | 1330 SAT1_CF | blue | na |
| chrUn | 7113275 | 7113635 | 361 SAT1_CF  | blue | na |
| chrUn | 7113659 | 7114975 | 1317 SAT1_CF | blue | na |
| chrUn | 7114987 | 7115542 | 556 SAT1_CF  | blue | na |
| chrUn | 7115563 | 7115671 | 109 SAT1_CF  | blue | na |
| chrUn | 7115684 | 7116184 | 501 SAT1_CF  | blue | na |
| chrUn | 7116224 | 7116616 | 393 SAT1_CF  | blue | na |
| chrUn | 7116633 | 7117488 | 856 SAT1_CF  | blue | na |
| chrUn | 7117536 | 7118870 | 1335 SAT1_CF | blue | na |
| chrUn | 7118883 | 7119385 | 503 SAT1_CF  | blue | na |
| chrUn | 7119471 | 7119645 | 175 SAT1_CF  | blue | na |
| chrUn | 7119726 | 7121535 | 1810 SAT1_CF | blue | na |
| chrUn | 7121557 | 7121624 | 68 SAT1_CF   | blue | na |
| chrUn | 7121642 | 7121913 | 272 SAT1_CF  | blue | na |
| chrUn | 7121971 | 7122570 | 600 SAT1_CF  | blue | na |
| chrUn | 7122582 | 7123265 | 684 SAT1_CF  | blue | na |
| chrUn | 7123277 | 7124039 | 763 SAT1_CF  | blue | na |
| chrUn | 7124051 | 7124606 | 556 SAT1_CF  | blue | na |
| chrUn | 7124629 | 7124735 | 107 SAT1_CF  | blue | na |
| chrUn | 7124748 | 7126912 | 2165 SAT1_CF | blue | na |

|       |         |         |              |      |    |
|-------|---------|---------|--------------|------|----|
| chrUn | 7126924 | 7127438 | 515 SAT1_CF  | blue | na |
| chrUn | 7127464 | 7127999 | 536 SAT1_CF  | blue | na |
| chrUn | 7128115 | 7128765 | 651 SAT1_CF  | blue | na |
| chrUn | 7128808 | 7129484 | 677 SAT1_CF  | blue | na |
| chrUn | 7129496 | 7130098 | 603 SAT1_CF  | blue | na |
| chrUn | 7130109 | 7130789 | 681 SAT1_CF  | blue | na |
| chrUn | 7130801 | 7131490 | 690 SAT1_CF  | blue | na |
| chrUn | 7131504 | 7133345 | 1842 SAT1_CF | blue | na |
| chrUn | 7133358 | 7133895 | 538 SAT1_CF  | blue | na |
| chrUn | 7133937 | 7135004 | 1068 SAT1_CF | blue | na |
| chrUn | 7135027 | 7135098 | 72 SAT1_CF   | blue | na |
| chrUn | 7135111 | 7136166 | 1056 SAT1_CF | blue | na |
| chrUn | 7136187 | 7136296 | 110 SAT1_CF  | blue | na |
| chrUn | 7136308 | 7136809 | 502 SAT1_CF  | blue | na |
| chrUn | 7136896 | 7137249 | 354 SAT1_CF  | blue | na |
| chrUn | 7137260 | 7137772 | 513 SAT1_CF  | blue | na |
| chrUn | 7137839 | 7138803 | 965 SAT1_CF  | blue | na |
| chrUn | 7138846 | 7139392 | 547 SAT1_CF  | blue | na |
| chrUn | 7139414 | 7140088 | 675 SAT1_CF  | blue | na |
| chrUn | 7140111 | 7140217 | 107 SAT1_CF  | blue | na |
| chrUn | 7140229 | 7140731 | 503 SAT1_CF  | blue | na |
| chrUn | 7140776 | 7140933 | 158 SAT1_CF  | blue | na |
| chrUn | 7140961 | 7141471 | 511 SAT1_CF  | blue | na |
| chrUn | 7141514 | 7142312 | 799 SAT1_CF  | blue | na |
| chrUn | 7142356 | 7143531 | 1176 SAT1_CF | blue | na |
| chrUn | 7143552 | 7144513 | 962 SAT1_CF  | blue | na |
| chrUn | 7144592 | 7145553 | 962 SAT1_CF  | blue | na |
| chrUn | 7145598 | 7146263 | 666 SAT1_CF  | blue | na |
| chrUn | 7146285 | 7146969 | 685 SAT1_CF  | blue | na |
| chrUn | 7146981 | 7147463 | 483 SAT1_CF  | blue | na |
| chrUn | 7147526 | 7147922 | 397 SAT1_CF  | blue | na |
| chrUn | 7147934 | 7148455 | 522 SAT1_CF  | blue | na |
| chrUn | 7148468 | 7149986 | 1519 SAT1_CF | blue | na |
| chrUn | 7150004 | 7150504 | 501 SAT1_CF  | blue | na |
| chrUn | 7150540 | 7150913 | 374 SAT1_CF  | blue | na |
| chrUn | 7150957 | 7151500 | 544 SAT1_CF  | blue | na |
| chrUn | 7151579 | 7152537 | 959 SAT1_CF  | blue | na |
| chrUn | 7152548 | 7153844 | 1297 SAT1_CF | blue | na |
| chrUn | 7153914 | 7154459 | 546 SAT1_CF  | blue | na |
| chrUn | 7154481 | 7154587 | 107 SAT1_CF  | blue | na |
| chrUn | 7154600 | 7155101 | 502 SAT1_CF  | blue | na |
| chrUn | 7155186 | 7156327 | 1142 SAT1_CF | blue | na |

|       |         |         |              |      |    |
|-------|---------|---------|--------------|------|----|
| chrUn | 7156349 | 7156455 | 107 SAT1_CF  | blue | na |
| chrUn | 7156468 | 7157023 | 556 SAT1_CF  | blue | na |
| chrUn | 7157044 | 7157141 | 98 SAT1_CF   | blue | na |
| chrUn | 7157163 | 7157658 | 496 SAT1_CF  | blue | na |
| chrUn | 7157745 | 7160488 | 2744 SAT1_CF | blue | na |
| chrUn | 7160500 | 7161058 | 559 SAT1_CF  | blue | na |
| chrUn | 7161080 | 7161188 | 109 SAT1_CF  | blue | na |
| chrUn | 7161201 | 7161702 | 502 SAT1_CF  | blue | na |
| chrUn | 7161768 | 7161904 | 137 SAT1_CF  | blue | na |
| chrUn | 7161919 | 7162546 | 628 SAT1_CF  | blue | na |
| chrUn | 7162557 | 7164014 | 1458 SAT1_CF | blue | na |
| chrUn | 7164196 | 7165268 | 1073 SAT1_CF | blue | na |
| chrUn | 7165280 | 7165798 | 519 SAT1_CF  | blue | na |
| chrUn | 7165817 | 7166652 | 836 SAT1_CF  | blue | na |
| chrUn | 7166679 | 7167180 | 502 SAT1_CF  | blue | na |
| chrUn | 7167267 | 7168453 | 1187 SAT1_CF | blue | na |
| chrUn | 7168495 | 7169039 | 545 SAT1_CF  | blue | na |
| chrUn | 7169081 | 7169626 | 546 SAT1_CF  | blue | na |
| chrUn | 7169683 | 7170636 | 954 SAT1_CF  | blue | na |
| chrUn | 7170681 | 7171413 | 733 SAT1_CF  | blue | na |
| chrUn | 7171428 | 7172990 | 1563 SAT1_CF | blue | na |
| chrUn | 7173017 | 7173519 | 503 SAT1_CF  | blue | na |
| chrUn | 7173606 | 7173960 | 355 SAT1_CF  | blue | na |
| chrUn | 7173973 | 7174482 | 510 SAT1_CF  | blue | na |
| chrUn | 7174561 | 7175339 | 779 SAT1_CF  | blue | na |
| chrUn | 7175381 | 7175943 | 563 SAT1_CF  | blue | na |
| chrUn | 7176060 | 7177814 | 1755 SAT1_CF | blue | na |
| chrUn | 7177869 | 7178457 | 589 SAT1_CF  | blue | na |
| chrUn | 7178497 | 7178899 | 403 SAT1_CF  | blue | na |
| chrUn | 7178912 | 7180077 | 1166 SAT1_CF | blue | na |
| chrUn | 7180102 | 7180721 | 620 SAT1_CF  | blue | na |
| chrUn | 7180741 | 7182209 | 1469 SAT1_CF | blue | na |
| chrUn | 7182241 | 7183949 | 1709 SAT1_CF | blue | na |
| chrUn | 7183971 | 7184195 | 225 SAT1_CF  | blue | na |
| chrUn | 7184370 | 7185892 | 1523 SAT1_CF | blue | na |
| chrUn | 7185935 | 7186559 | 625 SAT1_CF  | blue | na |
| chrUn | 7186570 | 7187202 | 633 SAT1_CF  | blue | na |
| chrUn | 7187259 | 7187331 | 73 SAT1_CF   | blue | na |
| chrUn | 7187345 | 7187920 | 576 SAT1_CF  | blue | na |
| chrUn | 7187997 | 7188857 | 861 SAT1_CF  | blue | na |
| chrUn | 7188869 | 7189551 | 683 SAT1_CF  | blue | na |
| chrUn | 7189565 | 7190138 | 574 SAT1_CF  | blue | na |



|       |         |         |              |      |    |
|-------|---------|---------|--------------|------|----|
| chrUn | 7190159 | 7190267 | 109 SAT1_CF  | blue | na |
| chrUn | 7190280 | 7190825 | 546 SAT1_CF  | blue | na |
| chrUn | 7190902 | 7191958 | 1057 SAT1_CF | blue | na |
| chrUn | 7192016 | 7192826 | 811 SAT1_CF  | blue | na |
| chrUn | 7192841 | 7193517 | 677 SAT1_CF  | blue | na |
| chrUn | 7193529 | 7194212 | 684 SAT1_CF  | blue | na |
| chrUn | 7194225 | 7194706 | 482 SAT1_CF  | blue | na |
| chrUn | 7194727 | 7195125 | 399 SAT1_CF  | blue | na |
| chrUn | 7195139 | 7196292 | 1154 SAT1_CF | blue | na |
| chrUn | 7196305 | 7197040 | 736 SAT1_CF  | blue | na |
| chrUn | 7197054 | 7197568 | 515 SAT1_CF  | blue | na |
| chrUn | 7197594 | 7197751 | 158 SAT1_CF  | blue | na |
| chrUn | 7197766 | 7198290 | 525 SAT1_CF  | blue | na |
| chrUn | 7198369 | 7199603 | 1235 SAT1_CF | blue | na |
| chrUn | 7199615 | 7200116 | 502 SAT1_CF  | blue | na |
| chrUn | 7200156 | 7201337 | 1182 SAT1_CF | blue | na |
| chrUn | 7201403 | 7203039 | 1637 SAT1_CF | blue | na |
| chrUn | 7203081 | 7204220 | 1140 SAT1_CF | blue | na |
| chrUn | 7204247 | 7205077 | 831 SAT1_CF  | blue | na |
| chrUn | 7205099 | 7206203 | 1105 SAT1_CF | blue | na |
| chrUn | 7206226 | 7207361 | 1136 SAT1_CF | blue | na |
| chrUn | 7207382 | 7208875 | 1494 SAT1_CF | blue | na |
| chrUn | 7208897 | 7209422 | 526 SAT1_CF  | blue | na |
| chrUn | 7209465 | 7210011 | 547 SAT1_CF  | blue | na |
| chrUn | 7210068 | 7210592 | 525 SAT1_CF  | blue | na |
| chrUn | 7210610 | 7210722 | 113 SAT1_CF  | blue | na |
| chrUn | 7210735 | 7211235 | 501 SAT1_CF  | blue | na |
| chrUn | 7211275 | 7211534 | 260 SAT1_CF  | blue | na |
| chrUn | 7211578 | 7212125 | 548 SAT1_CF  | blue | na |
| chrUn | 7212168 | 7212861 | 694 SAT1_CF  | blue | na |
| chrUn | 7212873 | 7213556 | 684 SAT1_CF  | blue | na |
| chrUn | 7213569 | 7214268 | 700 SAT1_CF  | blue | na |
| chrUn | 7214296 | 7215932 | 1637 SAT1_CF | blue | na |
| chrUn | 7216001 | 7216845 | 845 SAT1_CF  | blue | na |
| chrUn | 7216857 | 7217540 | 684 SAT1_CF  | blue | na |
| chrUn | 7217553 | 7218072 | 520 SAT1_CF  | blue | na |
| chrUn | 7218140 | 7218495 | 356 SAT1_CF  | blue | na |
| chrUn | 7218506 | 7219015 | 510 SAT1_CF  | blue | na |
| chrUn | 7219046 | 7220633 | 1588 SAT1_CF | blue | na |
| chrUn | 7220645 | 7221174 | 530 SAT1_CF  | blue | na |
| chrUn | 7221227 | 7221303 | 77 SAT1_CF   | blue | na |
| chrUn | 7221316 | 7221859 | 544 SAT1_CF  | blue | na |

|       |         |         |              |      |    |
|-------|---------|---------|--------------|------|----|
| chrUn | 7221923 | 7223125 | 1203 SAT1_CF | blue | na |
| chrUn | 7223192 | 7223453 | 262 SAT1_CF  | blue | na |
| chrUn | 7223537 | 7224063 | 527 SAT1_CF  | blue | na |
| chrUn | 7224143 | 7225441 | 1299 SAT1_CF | blue | na |
| chrUn | 7225454 | 7226136 | 683 SAT1_CF  | blue | na |
| chrUn | 7226156 | 7226649 | 494 SAT1_CF  | blue | na |
| chrUn | 7226689 | 7227262 | 574 SAT1_CF  | blue | na |
| chrUn | 7228660 | 7229418 | 759 SAT1_CF  | blue | na |
| chrUn | 7229461 | 7230138 | 678 SAT1_CF  | blue | na |
| chrUn | 7230158 | 7230653 | 496 SAT1_CF  | blue | na |
| chrUn | 7230719 | 7230855 | 137 SAT1_CF  | blue | na |
| chrUn | 7230870 | 7231394 | 525 SAT1_CF  | blue | na |
| chrUn | 7231424 | 7232631 | 1208 SAT1_CF | blue | na |
| chrUn | 7232716 | 7233568 | 853 SAT1_CF  | blue | na |
| chrUn | 7233580 | 7234193 | 614 SAT1_CF  | blue | na |
| chrUn | 7234207 | 7234951 | 745 SAT1_CF  | blue | na |
| chrUn | 7234979 | 7235479 | 501 SAT1_CF  | blue | na |
| chrUn | 7235524 | 7235681 | 158 SAT1_CF  | blue | na |
| chrUn | 7235709 | 7236965 | 1257 SAT1_CF | blue | na |
| chrUn | 7236978 | 7238698 | 1721 SAT1_CF | blue | na |
| chrUn | 7238740 | 7239595 | 856 SAT1_CF  | blue | na |
| chrUn | 7239607 | 7240292 | 686 SAT1_CF  | blue | na |
| chrUn | 7240304 | 7241631 | 1328 SAT1_CF | blue | na |
| chrUn | 7241710 | 7242070 | 361 SAT1_CF  | blue | na |
| chrUn | 7242095 | 7242637 | 543 SAT1_CF  | blue | na |
| chrUn | 7242734 | 7243400 | 667 SAT1_CF  | blue | na |
| chrUn | 7243412 | 7243967 | 556 SAT1_CF  | blue | na |
| chrUn | 7243990 | 7244096 | 107 SAT1_CF  | blue | na |
| chrUn | 7244109 | 7244610 | 502 SAT1_CF  | blue | na |
| chrUn | 7244663 | 7245546 | 884 SAT1_CF  | blue | na |
| chrUn | 7245578 | 7245914 | 337 SAT1_CF  | blue | na |
| chrUn | 7245962 | 7246608 | 647 SAT1_CF  | blue | na |
| chrUn | 7246620 | 7247295 | 676 SAT1_CF  | blue | na |
| chrUn | 7247308 | 7247809 | 502 SAT1_CF  | blue | na |
| chrUn | 7247895 | 7249876 | 1982 SAT1_CF | blue | na |
| chrUn | 7249888 | 7250882 | 995 SAT1_CF  | blue | na |
| chrUn | 7250895 | 7251593 | 699 SAT1_CF  | blue | na |
| chrUn | 7251621 | 7252812 | 1192 SAT1_CF | blue | na |
| chrUn | 7252839 | 7253470 | 632 SAT1_CF  | blue | na |
| chrUn | 7253513 | 7254843 | 1331 SAT1_CF | blue | na |
| chrUn | 7254856 | 7255603 | 748 SAT1_CF  | blue | na |
| chrUn | 7255630 | 7256147 | 518 SAT1_CF  | blue | na |

|       |         |         |              |      |    |
|-------|---------|---------|--------------|------|----|
| chrUn | 7256168 | 7256938 | 771 SAT1_CF  | blue | na |
| chrUn | 7256981 | 7257644 | 664 SAT1_CF  | blue | na |
| chrUn | 7257667 | 7258349 | 683 SAT1_CF  | blue | na |
| chrUn | 7258369 | 7258860 | 492 SAT1_CF  | blue | na |
| chrUn | 7258900 | 7259473 | 574 SAT1_CF  | blue | na |
| chrUn | 7260872 | 7261467 | 596 SAT1_CF  | blue | na |
| chrUn | 7261516 | 7262161 | 646 SAT1_CF  | blue | na |
| chrUn | 7262203 | 7262515 | 313 SAT1_CF  | blue | na |
| chrUn | 7262557 | 7263077 | 521 SAT1_CF  | blue | na |
| chrUn | 7263124 | 7263260 | 137 SAT1_CF  | blue | na |
| chrUn | 7263288 | 7265124 | 1837 SAT1_CF | blue | na |
| chrUn | 7265167 | 7265833 | 667 SAT1_CF  | blue | na |
| chrUn | 7265845 | 7266319 | 475 SAT1_CF  | blue | na |
| chrUn | 7266389 | 7267062 | 674 SAT1_CF  | blue | na |
| chrUn | 7267074 | 7267616 | 543 SAT1_CF  | blue | na |
| chrUn | 7267659 | 7268809 | 1151 SAT1_CF | blue | na |
| chrUn | 7268822 | 7269637 | 816 SAT1_CF  | blue | na |
| chrUn | 7269650 | 7271020 | 1371 SAT1_CF | blue | na |
| chrUn | 7271058 | 7272020 | 963 SAT1_CF  | blue | na |
| chrUn | 7272064 | 7273051 | 988 SAT1_CF  | blue | na |
| chrUn | 7273099 | 7273773 | 675 SAT1_CF  | blue | na |
| chrUn | 7273785 | 7275145 | 1361 SAT1_CF | blue | na |
| chrUn | 7275261 | 7276386 | 1126 SAT1_CF | blue | na |
| chrUn | 7276399 | 7277083 | 685 SAT1_CF  | blue | na |
| chrUn | 7277096 | 7277598 | 503 SAT1_CF  | blue | na |
| chrUn | 7277655 | 7277996 | 342 SAT1_CF  | blue | na |
| chrUn | 7278011 | 7279447 | 1437 SAT1_CF | blue | na |
| chrUn | 7279459 | 7280106 | 648 SAT1_CF  | blue | na |
| chrUn | 7280156 | 7280655 | 500 SAT1_CF  | blue | na |
| chrUn | 7280700 | 7280860 | 161 SAT1_CF  | blue | na |
| chrUn | 7280871 | 7281395 | 525 SAT1_CF  | blue | na |
| chrUn | 7281425 | 7282010 | 586 SAT1_CF  | blue | na |
| chrUn | 7282067 | 7282699 | 633 SAT1_CF  | blue | na |
| chrUn | 7282741 | 7283406 | 666 SAT1_CF  | blue | na |
| chrUn | 7283418 | 7283894 | 477 SAT1_CF  | blue | na |
| chrUn | 7283964 | 7284636 | 673 SAT1_CF  | blue | na |
| chrUn | 7284648 | 7285408 | 761 SAT1_CF  | blue | na |
| chrUn | 7285420 | 7286101 | 682 SAT1_CF  | blue | na |
| chrUn | 7286114 | 7286616 | 503 SAT1_CF  | blue | na |
| chrUn | 7286672 | 7287613 | 942 SAT1_CF  | blue | na |
| chrUn | 7287692 | 7288655 | 964 SAT1_CF  | blue | na |
| chrUn | 7288698 | 7289374 | 677 SAT1_CF  | blue | na |

|       |         |         |              |      |    |
|-------|---------|---------|--------------|------|----|
| chrUn | 7289386 | 7289888 | 503 SAT1_CF  | blue | na |
| chrUn | 7289928 | 7291669 | 1742 SAT1_CF | blue | na |
| chrUn | 7291681 | 7292443 | 763 SAT1_CF  | blue | na |
| chrUn | 7292455 | 7293009 | 555 SAT1_CF  | blue | na |
| chrUn | 7293031 | 7293649 | 619 SAT1_CF  | blue | na |
| chrUn | 7293689 | 7293948 | 260 SAT1_CF  | blue | na |
| chrUn | 7293992 | 7294538 | 547 SAT1_CF  | blue | na |
| chrUn | 7294581 | 7295272 | 692 SAT1_CF  | blue | na |
| chrUn | 7295284 | 7297407 | 2124 SAT1_CF | blue | na |
| chrUn | 7297449 | 7298179 | 731 SAT1_CF  | blue | na |
| chrUn | 7298199 | 7298308 | 110 SAT1_CF  | blue | na |
| chrUn | 7298320 | 7298822 | 503 SAT1_CF  | blue | na |
| chrUn | 7298904 | 7299259 | 356 SAT1_CF  | blue | na |
| chrUn | 7299270 | 7300246 | 977 SAT1_CF  | blue | na |
| chrUn | 7300290 | 7300935 | 646 SAT1_CF  | blue | na |
| chrUn | 7300947 | 7301801 | 855 SAT1_CF  | blue | na |
| chrUn | 7301829 | 7302340 | 512 SAT1_CF  | blue | na |
| chrUn | 7302385 | 7302541 | 157 SAT1_CF  | blue | na |
| chrUn | 7302721 | 7302923 | 203 SAT1_CF  | blue | na |
| chrUn | 7302966 | 7303511 | 546 SAT1_CF  | blue | na |
| chrUn | 7303555 | 7304335 | 781 SAT1_CF  | blue | na |
| chrUn | 7304377 | 7304549 | 173 SAT1_CF  | blue | na |
| chrUn | 7304561 | 7305231 | 671 SAT1_CF  | blue | na |
| chrUn | 7305249 | 7305749 | 501 SAT1_CF  | blue | na |
| chrUn | 7305785 | 7308646 | 2862 SAT1_CF | blue | na |
| chrUn | 7308661 | 7309183 | 523 SAT1_CF  | blue | na |
| chrUn | 7309226 | 7310249 | 1024 SAT1_CF | blue | na |
| chrUn | 7310302 | 7311091 | 790 SAT1_CF  | blue | na |
| chrUn | 7311112 | 7311220 | 109 SAT1_CF  | blue | na |
| chrUn | 7311233 | 7311734 | 502 SAT1_CF  | blue | na |
| chrUn | 7311789 | 7313158 | 1370 SAT1_CF | blue | na |
| chrUn | 7313198 | 7314531 | 1334 SAT1_CF | blue | na |
| chrUn | 7314543 | 7315063 | 521 SAT1_CF  | blue | na |
| chrUn | 7315089 | 7315246 | 158 SAT1_CF  | blue | na |
| chrUn | 7315279 | 7315785 | 507 SAT1_CF  | blue | na |
| chrUn | 7315816 | 7317542 | 1727 SAT1_CF | blue | na |
| chrUn | 7317582 | 7317973 | 392 SAT1_CF  | blue | na |
| chrUn | 7317988 | 7318125 | 138 SAT1_CF  | blue | na |
| chrUn | 7318139 | 7319507 | 1369 SAT1_CF | blue | na |
| chrUn | 7319550 | 7320225 | 676 SAT1_CF  | blue | na |
| chrUn | 7320238 | 7320720 | 483 SAT1_CF  | blue | na |
| chrUn | 7320780 | 7322817 | 2038 SAT1_CF | blue | na |

|       |         |         |              |      |    |
|-------|---------|---------|--------------|------|----|
| chrUn | 7322860 | 7323535 | 676 SAT1_CF  | blue | na |
| chrUn | 7323547 | 7324162 | 616 SAT1_CF  | blue | na |
| chrUn | 7324176 | 7324921 | 746 SAT1_CF  | blue | na |
| chrUn | 7324948 | 7325449 | 502 SAT1_CF  | blue | na |
| chrUn | 7325489 | 7325891 | 403 SAT1_CF  | blue | na |
| chrUn | 7325902 | 7327862 | 1961 SAT1_CF | blue | na |
| chrUn | 7327919 | 7328438 | 520 SAT1_CF  | blue | na |
| chrUn | 7328510 | 7328876 | 367 SAT1_CF  | blue | na |
| chrUn | 7328919 | 7330277 | 1359 SAT1_CF | blue | na |
| chrUn | 7330289 | 7330902 | 614 SAT1_CF  | blue | na |
| chrUn | 7330915 | 7331898 | 984 SAT1_CF  | blue | na |
| chrUn | 7331919 | 7332028 | 110 SAT1_CF  | blue | na |
| chrUn | 7332040 | 7332541 | 502 SAT1_CF  | blue | na |
| chrUn | 7332628 | 7332983 | 356 SAT1_CF  | blue | na |
| chrUn | 7332999 | 7334071 | 1073 SAT1_CF | blue | na |
| chrUn | 7334093 | 7334619 | 527 SAT1_CF  | blue | na |
| chrUn | 7334662 | 7335322 | 661 SAT1_CF  | blue | na |
| chrUn | 7335349 | 7336774 | 1426 SAT1_CF | blue | na |
| chrUn | 7336805 | 7337745 | 941 SAT1_CF  | blue | na |
| chrUn | 7337825 | 7338791 | 967 SAT1_CF  | blue | na |
| chrUn | 7338834 | 7339501 | 668 SAT1_CF  | blue | na |
| chrUn | 7339521 | 7340014 | 494 SAT1_CF  | blue | na |
| chrUn | 7340059 | 7340216 | 158 SAT1_CF  | blue | na |
| chrUn | 7340249 | 7341424 | 1176 SAT1_CF | blue | na |
| chrUn | 7341447 | 7341552 | 106 SAT1_CF  | blue | na |
| chrUn | 7341565 | 7342082 | 518 SAT1_CF  | blue | na |
| chrUn | 7342101 | 7344141 | 2041 SAT1_CF | blue | na |
| chrUn | 7344185 | 7344859 | 675 SAT1_CF  | blue | na |
| chrUn | 7344871 | 7345638 | 768 SAT1_CF  | blue | na |
| chrUn | 7345651 | 7346133 | 483 SAT1_CF  | blue | na |
| chrUn | 7346193 | 7346552 | 360 SAT1_CF  | blue | na |
| chrUn | 7346567 | 7347115 | 549 SAT1_CF  | blue | na |
| chrUn | 7347153 | 7348996 | 1844 SAT1_CF | blue | na |
| chrUn | 7349039 | 7349712 | 674 SAT1_CF  | blue | na |
| chrUn | 7349725 | 7350226 | 502 SAT1_CF  | blue | na |
| chrUn | 7350292 | 7350427 | 136 SAT1_CF  | blue | na |
| chrUn | 7350442 | 7350967 | 526 SAT1_CF  | blue | na |
| chrUn | 7351047 | 7351611 | 565 SAT1_CF  | blue | na |
| chrUn | 7351654 | 7353348 | 1695 SAT1_CF | blue | na |
| chrUn | 7353376 | 7353887 | 512 SAT1_CF  | blue | na |
| chrUn | 7354186 | 7356107 | 1922 SAT1_CF | blue | na |
| chrUn | 7356140 | 7356975 | 836 SAT1_CF  | blue | na |

|       |         |         |              |      |    |
|-------|---------|---------|--------------|------|----|
| chrUn | 7356987 | 7358366 | 1380 SAT1_CF | blue | na |
| chrUn | 7358378 | 7358931 | 554 SAT1_CF  | blue | na |
| chrUn | 7358953 | 7359058 | 106 SAT1_CF  | blue | na |
| chrUn | 7359072 | 7359557 | 486 SAT1_CF  | blue | na |
| chrUn | 7359629 | 7360175 | 547 SAT1_CF  | blue | na |
| chrUn | 7360218 | 7360753 | 536 SAT1_CF  | blue | na |
| chrUn | 7360797 | 7362043 | 1247 SAT1_CF | blue | na |
| chrUn | 7362065 | 7362130 | 66 SAT1_CF   | blue | na |
| chrUn | 7362150 | 7362911 | 762 SAT1_CF  | blue | na |
| chrUn | 7362924 | 7364275 | 1352 SAT1_CF | blue | na |
| chrUn | 7364306 | 7365059 | 754 SAT1_CF  | blue | na |
| chrUn | 7365073 | 7366345 | 1273 SAT1_CF | blue | na |
| chrUn | 7366366 | 7366473 | 108 SAT1_CF  | blue | na |
| chrUn | 7366486 | 7367005 | 520 SAT1_CF  | blue | na |
| chrUn | 7367026 | 7367207 | 182 SAT1_CF  | blue | na |
| chrUn | 7367389 | 7368503 | 1115 SAT1_CF | blue | na |
| chrUn | 7368548 | 7369085 | 538 SAT1_CF  | blue | na |
| chrUn | 7369127 | 7370534 | 1408 SAT1_CF | blue | na |
| chrUn | 7370578 | 7371368 | 791 SAT1_CF  | blue | na |
| chrUn | 7371411 | 7372271 | 861 SAT1_CF  | blue | na |
| chrUn | 7372283 | 7372802 | 520 SAT1_CF  | blue | na |
| chrUn | 7372824 | 7372889 | 66 SAT1_CF   | blue | na |
| chrUn | 7372909 | 7373665 | 757 SAT1_CF  | blue | na |
| chrUn | 7373683 | 7374184 | 502 SAT1_CF  | blue | na |
| chrUn | 7374224 | 7375244 | 1021 SAT1_CF | blue | na |
| chrUn | 7375299 | 7375917 | 619 SAT1_CF  | blue | na |
| chrUn | 7375932 | 7377173 | 1242 SAT1_CF | blue | na |
| chrUn | 7377239 | 7377375 | 137 SAT1_CF  | blue | na |
| chrUn | 7377390 | 7377913 | 524 SAT1_CF  | blue | na |
| chrUn | 7377956 | 7379279 | 1324 SAT1_CF | blue | na |
| chrUn | 7379299 | 7379847 | 549 SAT1_CF  | blue | na |
| chrUn | 7379860 | 7380751 | 892 SAT1_CF  | blue | na |
| chrUn | 7380763 | 7383085 | 2323 SAT1_CF | blue | na |
| chrUn | 7383128 | 7383775 | 648 SAT1_CF  | blue | na |
| chrUn | 7383788 | 7384309 | 522 SAT1_CF  | blue | na |
| chrUn | 7384329 | 7384729 | 401 SAT1_CF  | blue | na |
| chrUn | 7384740 | 7385608 | 869 SAT1_CF  | blue | na |
| chrUn | 7385654 | 7386197 | 544 SAT1_CF  | blue | na |
| chrUn | 7386239 | 7386410 | 172 SAT1_CF  | blue | na |
| chrUn | 7386424 | 7387438 | 1015 SAT1_CF | blue | na |
| chrUn | 7387512 | 7389619 | 2108 SAT1_CF | blue | na |
| chrUn | 7389675 | 7390048 | 374 SAT1_CF  | blue | na |

|       |         |         |              |      |    |
|-------|---------|---------|--------------|------|----|
| chrUn | 7390095 | 7390766 | 672 SAT1_CF  | blue | na |
| chrUn | 7390778 | 7391463 | 686 SAT1_CF  | blue | na |
| chrUn | 7391474 | 7391976 | 503 SAT1_CF  | blue | na |
| chrUn | 7392061 | 7392176 | 116 SAT1_CF  | blue | na |
| chrUn | 7392204 | 7392714 | 511 SAT1_CF  | blue | na |
| chrUn | 7392794 | 7394737 | 1944 SAT1_CF | blue | na |
| chrUn | 7394749 | 7395942 | 1194 SAT1_CF | blue | na |
| chrUn | 7395982 | 7396555 | 574 SAT1_CF  | blue | na |
| chrUn | 7397970 | 7398534 | 565 SAT1_CF  | blue | na |
| chrUn | 7398548 | 7400178 | 1631 SAT1_CF | blue | na |
| chrUn | 7400192 | 7400684 | 493 SAT1_CF  | blue | na |
| chrUn | 7400695 | 7401418 | 724 SAT1_CF  | blue | na |
| chrUn | 7401430 | 7402627 | 1198 SAT1_CF | blue | na |
| chrUn | 7402667 | 7403971 | 1305 SAT1_CF | blue | na |
| chrUn | 7403989 | 7405276 | 1288 SAT1_CF | blue | na |
| chrUn | 7405288 | 7405843 | 556 SAT1_CF  | blue | na |
| chrUn | 7405864 | 7405970 | 107 SAT1_CF  | blue | na |
| chrUn | 7405983 | 7406586 | 604 SAT1_CF  | blue | na |
| chrUn | 7406598 | 7407229 | 632 SAT1_CF  | blue | na |
| chrUn | 7407261 | 7408298 | 1038 SAT1_CF | blue | na |
| chrUn | 7408311 | 7409121 | 811 SAT1_CF  | blue | na |
| chrUn | 7409133 | 7410099 | 967 SAT1_CF  | blue | na |
| chrUn | 7410188 | 7411528 | 1341 SAT1_CF | blue | na |
| chrUn | 7411556 | 7412186 | 631 SAT1_CF  | blue | na |
| chrUn | 7412229 | 7412904 | 676 SAT1_CF  | blue | na |
| chrUn | 7412916 | 7413597 | 682 SAT1_CF  | blue | na |
| chrUn | 7413610 | 7414091 | 482 SAT1_CF  | blue | na |
| chrUn | 7414153 | 7415171 | 1019 SAT1_CF | blue | na |
| chrUn | 7415191 | 7416199 | 1009 SAT1_CF | blue | na |
| chrUn | 7416242 | 7417935 | 1694 SAT1_CF | blue | na |
| chrUn | 7417966 | 7418458 | 493 SAT1_CF  | blue | na |
| chrUn | 7418602 | 7418957 | 356 SAT1_CF  | blue | na |
| chrUn | 7418970 | 7420632 | 1663 SAT1_CF | blue | na |
| chrUn | 7420674 | 7421346 | 673 SAT1_CF  | blue | na |
| chrUn | 7421358 | 7421915 | 558 SAT1_CF  | blue | na |
| chrUn | 7421942 | 7422045 | 104 SAT1_CF  | blue | na |
| chrUn | 7422058 | 7422761 | 704 SAT1_CF  | blue | na |
| chrUn | 7422789 | 7423974 | 1186 SAT1_CF | blue | na |
| chrUn | 7424016 | 7424560 | 545 SAT1_CF  | blue | na |
| chrUn | 7424603 | 7425280 | 678 SAT1_CF  | blue | na |
| chrUn | 7425292 | 7426055 | 764 SAT1_CF  | blue | na |
| chrUn | 7426067 | 7426621 | 555 SAT1_CF  | blue | na |

|       |         |         |              |      |    |
|-------|---------|---------|--------------|------|----|
| chrUn | 7426646 | 7426745 | 100 SAT1_CF  | blue | na |
| chrUn | 7426764 | 7427266 | 503 SAT1_CF  | blue | na |
| chrUn | 7427312 | 7427419 | 108 SAT1_CF  | blue | na |
| chrUn | 7427483 | 7428689 | 1207 SAT1_CF | blue | na |
| chrUn | 7428716 | 7429347 | 632 SAT1_CF  | blue | na |
| chrUn | 7429390 | 7430801 | 1412 SAT1_CF | blue | na |
| chrUn | 7430828 | 7432482 | 1655 SAT1_CF | blue | na |
| chrUn | 7432520 | 7432875 | 356 SAT1_CF  | blue | na |
| chrUn | 7432899 | 7433420 | 522 SAT1_CF  | blue | na |
| chrUn | 7433451 | 7433840 | 390 SAT1_CF  | blue | na |
| chrUn | 7433910 | 7434451 | 542 SAT1_CF  | blue | na |
| chrUn | 7434494 | 7435045 | 552 SAT1_CF  | blue | na |
| chrUn | 7435070 | 7435134 | 65 SAT1_CF   | blue | na |
| chrUn | 7435152 | 7435913 | 762 SAT1_CF  | blue | na |
| chrUn | 7435926 | 7436630 | 705 SAT1_CF  | blue | na |
| chrUn | 7436645 | 7438039 | 1395 SAT1_CF | blue | na |
| chrUn | 7438056 | 7438557 | 502 SAT1_CF  | blue | na |
| chrUn | 7438597 | 7439998 | 1402 SAT1_CF | blue | na |
| chrUn | 7440022 | 7441351 | 1330 SAT1_CF | blue | na |
| chrUn | 7441363 | 7442051 | 689 SAT1_CF  | blue | na |
| chrUn | 7442064 | 7442918 | 855 SAT1_CF  | blue | na |
| chrUn | 7442930 | 7444417 | 1488 SAT1_CF | blue | na |
| chrUn | 7444443 | 7444954 | 512 SAT1_CF  | blue | na |
| chrUn | 7445014 | 7445191 | 178 SAT1_CF  | blue | na |
| chrUn | 7445233 | 7446603 | 1371 SAT1_CF | blue | na |
| chrUn | 7446621 | 7447525 | 905 SAT1_CF  | blue | na |
| chrUn | 7447568 | 7448418 | 851 SAT1_CF  | blue | na |
| chrUn | 7448441 | 7449122 | 682 SAT1_CF  | blue | na |
| chrUn | 7449142 | 7449636 | 495 SAT1_CF  | blue | na |
| chrUn | 7449723 | 7450192 | 470 SAT1_CF  | blue | na |
| chrUn | 7451605 | 7451959 | 355 SAT1_CF  | blue | na |
| chrUn | 7452008 | 7452652 | 645 SAT1_CF  | blue | na |
| chrUn | 7452701 | 7453006 | 306 SAT1_CF  | blue | na |
| chrUn | 7453048 | 7453548 | 501 SAT1_CF  | blue | na |
| chrUn | 7453591 | 7453987 | 397 SAT1_CF  | blue | na |
| chrUn | 7453998 | 7455622 | 1625 SAT1_CF | blue | na |
| chrUn | 7455665 | 7456337 | 673 SAT1_CF  | blue | na |
| chrUn | 7456351 | 7456852 | 502 SAT1_CF  | blue | na |
| chrUn | 7456939 | 7457293 | 355 SAT1_CF  | blue | na |
| chrUn | 7457440 | 7457987 | 548 SAT1_CF  | blue | na |
| chrUn | 7458001 | 7458873 | 873 SAT1_CF  | blue | na |
| chrUn | 7458921 | 7460894 | 1974 SAT1_CF | blue | na |



|       |         |         |              |      |    |
|-------|---------|---------|--------------|------|----|
| chrUn | 7460963 | 7461746 | 784 SAT1_CF  | blue | na |
| chrUn | 7461773 | 7464906 | 3134 SAT1_CF | blue | na |
| chrUn | 7464926 | 7465400 | 475 SAT1_CF  | blue | na |
| chrUn | 7465459 | 7467739 | 2281 SAT1_CF | blue | na |
| chrUn | 7467752 | 7468326 | 575 SAT1_CF  | blue | na |
| chrUn | 7468355 | 7468455 | 101 SAT1_CF  | blue | na |
| chrUn | 7468468 | 7469013 | 546 SAT1_CF  | blue | na |
| chrUn | 7469090 | 7470147 | 1058 SAT1_CF | blue | na |
| chrUn | 7470201 | 7470360 | 160 SAT1_CF  | blue | na |
| chrUn | 7470372 | 7471017 | 646 SAT1_CF  | blue | na |
| chrUn | 7471030 | 7471907 | 878 SAT1_CF  | blue | na |
| chrUn | 7471932 | 7472474 | 543 SAT1_CF  | blue | na |
| chrUn | 7472571 | 7473248 | 678 SAT1_CF  | blue | na |
| chrUn | 7473260 | 7473814 | 555 SAT1_CF  | blue | na |
| chrUn | 7473879 | 7474855 | 977 SAT1_CF  | blue | na |
| chrUn | 7474869 | 7476021 | 1153 SAT1_CF | blue | na |
| chrUn | 7476034 | 7478501 | 2468 SAT1_CF | blue | na |
| chrUn | 7478566 | 7479234 | 669 SAT1_CF  | blue | na |
| chrUn | 7479276 | 7479507 | 232 SAT1_CF  | blue | na |
| chrUn | 7479806 | 7480649 | 844 SAT1_CF  | blue | na |
| chrUn | 7480660 | 7481341 | 682 SAT1_CF  | blue | na |
| chrUn | 7481353 | 7482113 | 761 SAT1_CF  | blue | na |
| chrUn | 7482126 | 7482286 | 161 SAT1_CF  | blue | na |
| chrUn | 7482799 | 7483175 | 377 SAT1_CF  | blue | na |
| chrUn | 7483209 | 7483527 | 319 SAT1_CF  | blue | na |
| chrUn | 7483538 | 7484359 | 822 SAT1_CF  | blue | na |
| chrUn | 7484398 | 7485744 | 1347 SAT1_CF | blue | na |
| chrUn | 7485757 | 7486611 | 855 SAT1_CF  | blue | na |
| chrUn | 7486623 | 7488109 | 1487 SAT1_CF | blue | na |
| chrUn | 7488135 | 7489117 | 983 SAT1_CF  | blue | na |
| chrUn | 7489160 | 7489834 | 675 SAT1_CF  | blue | na |
| chrUn | 7489846 | 7491052 | 1207 SAT1_CF | blue | na |
| chrUn | 7491068 | 7492432 | 1365 SAT1_CF | blue | na |
| chrUn | 7492446 | 7492938 | 493 SAT1_CF  | blue | na |
| chrUn | 7492949 | 7495271 | 2323 SAT1_CF | blue | na |
| chrUn | 7495325 | 7496290 | 966 SAT1_CF  | blue | na |
| chrUn | 7496333 | 7496999 | 667 SAT1_CF  | blue | na |
| chrUn | 7497022 | 7497704 | 683 SAT1_CF  | blue | na |
| chrUn | 7497724 | 7498217 | 494 SAT1_CF  | blue | na |
| chrUn | 7498304 | 7498774 | 471 SAT1_CF  | blue | na |
| chrUn | 7500168 | 7501810 | 1643 SAT1_CF | blue | na |
| chrUn | 7501852 | 7502351 | 500 SAT1_CF  | blue | na |

|       |         |         |              |      |    |
|-------|---------|---------|--------------|------|----|
| chrUn | 7502394 | 7502789 | 396 SAT1_CF  | blue | na |
| chrUn | 7502800 | 7503410 | 611 SAT1_CF  | blue | na |
| chrUn | 7503430 | 7504245 | 816 SAT1_CF  | blue | na |
| chrUn | 7504286 | 7505713 | 1428 SAT1_CF | blue | na |
| chrUn | 7505777 | 7506373 | 597 SAT1_CF  | blue | na |
| chrUn | 7506390 | 7506760 | 371 SAT1_CF  | blue | na |
| chrUn | 7506805 | 7509224 | 2420 SAT1_CF | blue | na |
| chrUn | 7509251 | 7509841 | 591 SAT1_CF  | blue | na |
| chrUn | 7509868 | 7511002 | 1135 SAT1_CF | blue | na |
| chrUn | 7511014 | 7511547 | 534 SAT1_CF  | blue | na |
| chrUn | 7511575 | 7512207 | 633 SAT1_CF  | blue | na |
| chrUn | 7512251 | 7512925 | 675 SAT1_CF  | blue | na |
| chrUn | 7512937 | 7513438 | 502 SAT1_CF  | blue | na |
| chrUn | 7513478 | 7514435 | 958 SAT1_CF  | blue | na |
| chrUn | 7514460 | 7514638 | 179 SAT1_CF  | blue | na |
| chrUn | 7514717 | 7515260 | 544 SAT1_CF  | blue | na |
| chrUn | 7515302 | 7516032 | 731 SAT1_CF  | blue | na |
| chrUn | 7516055 | 7516692 | 638 SAT1_CF  | blue | na |
| chrUn | 7516718 | 7516873 | 156 SAT1_CF  | blue | na |
| chrUn | 7517102 | 7517696 | 595 SAT1_CF  | blue | na |
| chrUn | 7517714 | 7518475 | 762 SAT1_CF  | blue | na |
| chrUn | 7518488 | 7520626 | 2139 SAT1_CF | blue | na |
| chrUn | 7520644 | 7521145 | 502 SAT1_CF  | blue | na |
| chrUn | 7521158 | 7522215 | 1058 SAT1_CF | blue | na |
| chrUn | 7522236 | 7522344 | 109 SAT1_CF  | blue | na |
| chrUn | 7522357 | 7522830 | 474 SAT1_CF  | blue | na |
| chrUn | 7522917 | 7523052 | 136 SAT1_CF  | blue | na |
| chrUn | 7523280 | 7525598 | 2319 SAT1_CF | blue | na |
| chrUn | 7525611 | 7526358 | 748 SAT1_CF  | blue | na |
| chrUn | 7526385 | 7526905 | 521 SAT1_CF  | blue | na |
| chrUn | 7526926 | 7529677 | 2752 SAT1_CF | blue | na |
| chrUn | 7529699 | 7531062 | 1364 SAT1_CF | blue | na |
| chrUn | 7531085 | 7531190 | 106 SAT1_CF  | blue | na |
| chrUn | 7531203 | 7531703 | 501 SAT1_CF  | blue | na |
| chrUn | 7531743 | 7533378 | 1636 SAT1_CF | blue | na |
| chrUn | 7533420 | 7534616 | 1197 SAT1_CF | blue | na |
| chrUn | 7534629 | 7535129 | 501 SAT1_CF  | blue | na |
| chrUn | 7535167 | 7535570 | 404 SAT1_CF  | blue | na |
| chrUn | 7535586 | 7536128 | 543 SAT1_CF  | blue | na |
| chrUn | 7536206 | 7536988 | 783 SAT1_CF  | blue | na |
| chrUn | 7537030 | 7537761 | 732 SAT1_CF  | blue | na |
| chrUn | 7537782 | 7537891 | 110 SAT1_CF  | blue | na |

|       |         |         |              |      |    |
|-------|---------|---------|--------------|------|----|
| chrUn | 7537905 | 7538586 | 682 SAT1_CF  | blue | na |
| chrUn | 7538599 | 7539119 | 521 SAT1_CF  | blue | na |
| chrUn | 7539161 | 7540004 | 844 SAT1_CF  | blue | na |
| chrUn | 7540048 | 7541306 | 1259 SAT1_CF | blue | na |
| chrUn | 7541337 | 7542830 | 1494 SAT1_CF | blue | na |
| chrUn | 7542842 | 7543775 | 934 SAT1_CF  | blue | na |
| chrUn | 7543845 | 7544518 | 674 SAT1_CF  | blue | na |
| chrUn | 7544530 | 7545764 | 1235 SAT1_CF | blue | na |
| chrUn | 7545792 | 7546423 | 632 SAT1_CF  | blue | na |
| chrUn | 7546466 | 7547141 | 676 SAT1_CF  | blue | na |
| chrUn | 7547153 | 7548271 | 1119 SAT1_CF | blue | na |
| chrUn | 7548305 | 7548489 | 185 SAT1_CF  | blue | na |
| chrUn | 7548670 | 7549506 | 837 SAT1_CF  | blue | na |
| chrUn | 7549518 | 7550278 | 761 SAT1_CF  | blue | na |
| chrUn | 7550292 | 7550793 | 502 SAT1_CF  | blue | na |
| chrUn | 7550846 | 7551235 | 390 SAT1_CF  | blue | na |
| chrUn | 7551269 | 7551535 | 267 SAT1_CF  | blue | na |
| chrUn | 7551578 | 7552140 | 563 SAT1_CF  | blue | na |
| chrUn | 7552167 | 7552799 | 633 SAT1_CF  | blue | na |
| chrUn | 7552842 | 7553518 | 677 SAT1_CF  | blue | na |
| chrUn | 7553530 | 7554291 | 762 SAT1_CF  | blue | na |
| chrUn | 7554311 | 7554779 | 469 SAT1_CF  | blue | na |
| chrUn | 7554800 | 7554897 | 98 SAT1_CF   | blue | na |
| chrUn | 7554920 | 7556935 | 2016 SAT1_CF | blue | na |
| chrUn | 7556949 | 7557488 | 540 SAT1_CF  | blue | na |
| chrUn | 7557531 | 7558674 | 1144 SAT1_CF | blue | na |
| chrUn | 7558688 | 7559369 | 682 SAT1_CF  | blue | na |
| chrUn | 7559381 | 7559935 | 555 SAT1_CF  | blue | na |
| chrUn | 7559957 | 7560064 | 108 SAT1_CF  | blue | na |
| chrUn | 7560077 | 7560594 | 518 SAT1_CF  | blue | na |
| chrUn | 7560611 | 7560984 | 374 SAT1_CF  | blue | na |
| chrUn | 7561027 | 7563146 | 2120 SAT1_CF | blue | na |
| chrUn | 7563159 | 7563668 | 510 SAT1_CF  | blue | na |
| chrUn | 7563682 | 7564558 | 877 SAT1_CF  | blue | na |
| chrUn | 7564606 | 7565287 | 682 SAT1_CF  | blue | na |
| chrUn | 7565298 | 7565791 | 494 SAT1_CF  | blue | na |
| chrUn | 7565836 | 7565991 | 156 SAT1_CF  | blue | na |
| chrUn | 7566204 | 7568105 | 1902 SAT1_CF | blue | na |
| chrUn | 7568148 | 7569357 | 1210 SAT1_CF | blue | na |
| chrUn | 7569383 | 7569540 | 158 SAT1_CF  | blue | na |
| chrUn | 7569555 | 7570183 | 629 SAT1_CF  | blue | na |
| chrUn | 7570194 | 7570878 | 685 SAT1_CF  | blue | na |

|       |         |         |              |      |    |
|-------|---------|---------|--------------|------|----|
| chrUn | 7570891 | 7571391 | 501 SAT1_CF  | blue | na |
| chrUn | 7571431 | 7572381 | 951 SAT1_CF  | blue | na |
| chrUn | 7572438 | 7574060 | 1623 SAT1_CF | blue | na |
| chrUn | 7574145 | 7574276 | 132 SAT1_CF  | blue | na |
| chrUn | 7574291 | 7574814 | 524 SAT1_CF  | blue | na |
| chrUn | 7574894 | 7575419 | 526 SAT1_CF  | blue | na |
| chrUn | 7575463 | 7576004 | 542 SAT1_CF  | blue | na |
| chrUn | 7576057 | 7576163 | 107 SAT1_CF  | blue | na |
| chrUn | 7576176 | 7576728 | 553 SAT1_CF  | blue | na |
| chrUn | 7576749 | 7576857 | 109 SAT1_CF  | blue | na |
| chrUn | 7576870 | 7577390 | 521 SAT1_CF  | blue | na |
| chrUn | 7577416 | 7577573 | 158 SAT1_CF  | blue | na |
| chrUn | 7577601 | 7578701 | 1101 SAT1_CF | blue | na |
| chrUn | 7578724 | 7578829 | 106 SAT1_CF  | blue | na |
| chrUn | 7578842 | 7579342 | 501 SAT1_CF  | blue | na |
| chrUn | 7579380 | 7580317 | 938 SAT1_CF  | blue | na |
| chrUn | 7580335 | 7580532 | 198 SAT1_CF  | blue | na |
| chrUn | 7580656 | 7581198 | 543 SAT1_CF  | blue | na |
| chrUn | 7581226 | 7581270 | 45 SAT1_CF   | blue | na |
| chrUn | 7581283 | 7582133 | 851 SAT1_CF  | blue | na |
| chrUn | 7582145 | 7582705 | 561 SAT1_CF  | blue | na |
| chrUn | 7582726 | 7582834 | 109 SAT1_CF  | blue | na |
| chrUn | 7582847 | 7583640 | 794 SAT1_CF  | blue | na |
| chrUn | 7583653 | 7583776 | 124 SAT1_CF  | blue | na |
| chrUn | 7583799 | 7584991 | 1193 SAT1_CF | blue | na |
| chrUn | 7585013 | 7585085 | 73 SAT1_CF   | blue | na |
| chrUn | 7585098 | 7586021 | 924 SAT1_CF  | blue | na |
| chrUn | 7586033 | 7586412 | 380 SAT1_CF  | blue | na |
| chrUn | 7586430 | 7588213 | 1784 SAT1_CF | blue | na |
| chrUn | 7588240 | 7588342 | 103 SAT1_CF  | blue | na |
| chrUn | 7588355 | 7588835 | 481 SAT1_CF  | blue | na |
| chrUn | 7588895 | 7589596 | 702 SAT1_CF  | blue | na |
| chrUn | 7589676 | 7590239 | 564 SAT1_CF  | blue | na |
| chrUn | 7590266 | 7590897 | 632 SAT1_CF  | blue | na |
| chrUn | 7590940 | 7591604 | 665 SAT1_CF  | blue | na |
| chrUn | 7591624 | 7592165 | 542 SAT1_CF  | blue | na |
| chrUn | 7592209 | 7593208 | 1000 SAT1_CF | blue | na |
| chrUn | 7593251 | 7593923 | 673 SAT1_CF  | blue | na |
| chrUn | 7593937 | 7594696 | 760 SAT1_CF  | blue | na |
| chrUn | 7594708 | 7595391 | 684 SAT1_CF  | blue | na |
| chrUn | 7595404 | 7595906 | 503 SAT1_CF  | blue | na |
| chrUn | 7595993 | 7596953 | 961 SAT1_CF  | blue | na |

|       |         |         |              |      |    |
|-------|---------|---------|--------------|------|----|
| chrUn | 7597020 | 7597984 | 965 SAT1_CF  | blue | na |
| chrUn | 7598027 | 7598697 | 671 SAT1_CF  | blue | na |
| chrUn | 7598715 | 7599267 | 553 SAT1_CF  | blue | na |
| chrUn | 7599289 | 7599361 | 73 SAT1_CF   | blue | na |
| chrUn | 7599374 | 7600171 | 798 SAT1_CF  | blue | na |
| chrUn | 7600192 | 7600301 | 110 SAT1_CF  | blue | na |
| chrUn | 7600314 | 7600996 | 683 SAT1_CF  | blue | na |
| chrUn | 7601008 | 7602547 | 1540 SAT1_CF | blue | na |
| chrUn | 7602558 | 7603317 | 760 SAT1_CF  | blue | na |
| chrUn | 7603330 | 7604030 | 701 SAT1_CF  | blue | na |
| chrUn | 7604242 | 7605446 | 1205 SAT1_CF | blue | na |
| chrUn | 7605489 | 7607492 | 2004 SAT1_CF | blue | na |
| chrUn | 7607549 | 7608041 | 493 SAT1_CF  | blue | na |
| chrUn | 7608061 | 7608299 | 239 SAT1_CF  | blue | na |
| chrUn | 7608332 | 7608838 | 507 SAT1_CF  | blue | na |
| chrUn | 7608919 | 7610029 | 1111 SAT1_CF | blue | na |
| chrUn | 7610042 | 7610762 | 721 SAT1_CF  | blue | na |
| chrUn | 7610782 | 7610891 | 110 SAT1_CF  | blue | na |
| chrUn | 7610903 | 7611588 | 686 SAT1_CF  | blue | na |
| chrUn | 7611606 | 7612437 | 832 SAT1_CF  | blue | na |
| chrUn | 7612489 | 7613117 | 629 SAT1_CF  | blue | na |
| chrUn | 7613141 | 7613247 | 107 SAT1_CF  | blue | na |
| chrUn | 7613260 | 7613761 | 502 SAT1_CF  | blue | na |
| chrUn | 7613827 | 7613962 | 136 SAT1_CF  | blue | na |
| chrUn | 7613990 | 7615179 | 1190 SAT1_CF | blue | na |
| chrUn | 7615223 | 7615763 | 541 SAT1_CF  | blue | na |
| chrUn | 7615860 | 7616537 | 678 SAT1_CF  | blue | na |
| chrUn | 7616549 | 7617102 | 554 SAT1_CF  | blue | na |
| chrUn | 7617123 | 7617226 | 104 SAT1_CF  | blue | na |
| chrUn | 7617244 | 7617742 | 499 SAT1_CF  | blue | na |
| chrUn | 7617808 | 7617944 | 137 SAT1_CF  | blue | na |
| chrUn | 7617976 | 7618480 | 505 SAT1_CF  | blue | na |
| chrUn | 7618514 | 7619203 | 690 SAT1_CF  | blue | na |
| chrUn | 7619226 | 7619297 | 72 SAT1_CF   | blue | na |
| chrUn | 7619311 | 7620056 | 746 SAT1_CF  | blue | na |
| chrUn | 7620082 | 7620563 | 482 SAT1_CF  | blue | na |
| chrUn | 7620670 | 7621025 | 356 SAT1_CF  | blue | na |
| chrUn | 7621059 | 7621545 | 487 SAT1_CF  | blue | na |
| chrUn | 7621579 | 7621858 | 280 SAT1_CF  | blue | na |
| chrUn | 7621900 | 7622457 | 558 SAT1_CF  | blue | na |
| chrUn | 7622499 | 7623044 | 546 SAT1_CF  | blue | na |
| chrUn | 7623101 | 7624058 | 958 SAT1_CF  | blue | na |

|       |         |         |              |      |    |
|-------|---------|---------|--------------|------|----|
| chrUn | 7624101 | 7625989 | 1889 SAT1_CF | blue | na |
| chrUn | 7626015 | 7626394 | 380 SAT1_CF  | blue | na |
| chrUn | 7626415 | 7626522 | 108 SAT1_CF  | blue | na |
| chrUn | 7626535 | 7627034 | 500 SAT1_CF  | blue | na |
| chrUn | 7627074 | 7627645 | 572 SAT1_CF  | blue | na |
| chrUn | 7627669 | 7628216 | 548 SAT1_CF  | blue | na |
| chrUn | 7628230 | 7628930 | 701 SAT1_CF  | blue | na |
| chrUn | 7628972 | 7629834 | 863 SAT1_CF  | blue | na |
| chrUn | 7629846 | 7630516 | 671 SAT1_CF  | blue | na |
| chrUn | 7630543 | 7631932 | 1390 SAT1_CF | blue | na |
| chrUn | 7631963 | 7632361 | 399 SAT1_CF  | blue | na |
| chrUn | 7632381 | 7632905 | 525 SAT1_CF  | blue | na |
| chrUn | 7633021 | 7633327 | 307 SAT1_CF  | blue | na |
| chrUn | 7633371 | 7635286 | 1916 SAT1_CF | blue | na |
| chrUn | 7635298 | 7635986 | 689 SAT1_CF  | blue | na |
| chrUn | 7635999 | 7636500 | 502 SAT1_CF  | blue | na |
| chrUn | 7636545 | 7636942 | 398 SAT1_CF  | blue | na |
| chrUn | 7636955 | 7637498 | 544 SAT1_CF  | blue | na |
| chrUn | 7637577 | 7638540 | 964 SAT1_CF  | blue | na |
| chrUn | 7638583 | 7639259 | 677 SAT1_CF  | blue | na |
| chrUn | 7639271 | 7640082 | 812 SAT1_CF  | blue | na |
| chrUn | 7640189 | 7641349 | 1161 SAT1_CF | blue | na |
| chrUn | 7641362 | 7642337 | 976 SAT1_CF  | blue | na |
| chrUn | 7642352 | 7643069 | 718 SAT1_CF  | blue | na |
| chrUn | 7643080 | 7643777 | 698 SAT1_CF  | blue | na |
| chrUn | 7643825 | 7644365 | 541 SAT1_CF  | blue | na |
| chrUn | 7644407 | 7644931 | 525 SAT1_CF  | blue | na |
| chrUn | 7644949 | 7645852 | 904 SAT1_CF  | blue | na |
| chrUn | 7645894 | 7646060 | 167 SAT1_CF  | blue | na |
| chrUn | 7646078 | 7646754 | 677 SAT1_CF  | blue | na |
| chrUn | 7646766 | 7647397 | 632 SAT1_CF  | blue | na |
| chrUn | 7647418 | 7647527 | 110 SAT1_CF  | blue | na |
| chrUn | 7647539 | 7648088 | 550 SAT1_CF  | blue | na |
| chrUn | 7648099 | 7649260 | 1162 SAT1_CF | blue | na |
| chrUn | 7649276 | 7649354 | 79 SAT1_CF   | blue | na |
| chrUn | 7649367 | 7650055 | 689 SAT1_CF  | blue | na |
| chrUn | 7650068 | 7650641 | 574 SAT1_CF  | blue | na |
| chrUn | 7650662 | 7650765 | 104 SAT1_CF  | blue | na |
| chrUn | 7650783 | 7651617 | 835 SAT1_CF  | blue | na |
| chrUn | 7651687 | 7652213 | 527 SAT1_CF  | blue | na |
| chrUn | 7652292 | 7652598 | 307 SAT1_CF  | blue | na |
| chrUn | 7652642 | 7653980 | 1339 SAT1_CF | blue | na |

|       |         |         |              |      |    |
|-------|---------|---------|--------------|------|----|
| chrUn | 7653992 | 7654546 | 555 SAT1_CF  | blue | na |
| chrUn | 7654567 | 7654657 | 91 SAT1_CF   | blue | na |
| chrUn | 7654686 | 7655409 | 724 SAT1_CF  | blue | na |
| chrUn | 7655470 | 7656147 | 678 SAT1_CF  | blue | na |
| chrUn | 7656159 | 7656714 | 556 SAT1_CF  | blue | na |
| chrUn | 7656779 | 7657353 | 575 SAT1_CF  | blue | na |
| chrUn | 7657419 | 7657555 | 137 SAT1_CF  | blue | na |
| chrUn | 7657583 | 7658131 | 549 SAT1_CF  | blue | na |
| chrUn | 7658174 | 7658738 | 565 SAT1_CF  | blue | na |
| chrUn | 7658766 | 7660991 | 2226 SAT1_CF | blue | na |
| chrUn | 7661018 | 7661559 | 542 SAT1_CF  | blue | na |
| chrUn | 7661601 | 7662796 | 1196 SAT1_CF | blue | na |
| chrUn | 7662808 | 7663492 | 685 SAT1_CF  | blue | na |
| chrUn | 7663512 | 7664006 | 495 SAT1_CF  | blue | na |
| chrUn | 7664044 | 7664619 | 576 SAT1_CF  | blue | na |
| chrUn | 7666017 | 7666558 | 542 SAT1_CF  | blue | na |
| chrUn | 7666608 | 7667279 | 672 SAT1_CF  | blue | na |
| chrUn | 7667357 | 7668212 | 856 SAT1_CF  | blue | na |
| chrUn | 7668224 | 7668906 | 683 SAT1_CF  | blue | na |
| chrUn | 7668919 | 7669601 | 683 SAT1_CF  | blue | na |
| chrUn | 7669614 | 7670114 | 501 SAT1_CF  | blue | na |
| chrUn | 7670156 | 7670558 | 403 SAT1_CF  | blue | na |
| chrUn | 7670569 | 7672901 | 2333 SAT1_CF | blue | na |
| chrUn | 7672913 | 7673594 | 682 SAT1_CF  | blue | na |
| chrUn | 7673607 | 7674856 | 1250 SAT1_CF | blue | na |
| chrUn | 7674900 | 7675532 | 633 SAT1_CF  | blue | na |
| chrUn | 7675553 | 7677031 | 1479 SAT1_CF | blue | na |
| chrUn | 7677051 | 7677158 | 108 SAT1_CF  | blue | na |
| chrUn | 7677178 | 7677716 | 539 SAT1_CF  | blue | na |
| chrUn | 7677784 | 7679825 | 2042 SAT1_CF | blue | na |
| chrUn | 7679868 | 7680536 | 669 SAT1_CF  | blue | na |
| chrUn | 7680549 | 7681249 | 701 SAT1_CF  | blue | na |
| chrUn | 7681264 | 7682457 | 1194 SAT1_CF | blue | na |
| chrUn | 7682483 | 7682585 | 103 SAT1_CF  | blue | na |
| chrUn | 7682598 | 7683076 | 479 SAT1_CF  | blue | na |
| chrUn | 7683183 | 7684095 | 913 SAT1_CF  | blue | na |
| chrUn | 7684210 | 7685174 | 965 SAT1_CF  | blue | na |
| chrUn | 7685217 | 7685891 | 675 SAT1_CF  | blue | na |
| chrUn | 7685903 | 7686546 | 644 SAT1_CF  | blue | na |
| chrUn | 7688199 | 7688824 | 626 SAT1_CF  | blue | na |
| chrUn | 7688855 | 7690158 | 1304 SAT1_CF | blue | na |
| chrUn | 7690202 | 7690850 | 649 SAT1_CF  | blue | na |

|       |         |         |              |      |    |
|-------|---------|---------|--------------|------|----|
| chrUn | 7690863 | 7691548 | 686 SAT1_CF  | blue | na |
| chrUn | 7691560 | 7692081 | 522 SAT1_CF  | blue | na |
| chrUn | 7692115 | 7692432 | 318 SAT1_CF  | blue | na |
| chrUn | 7692443 | 7694100 | 1658 SAT1_CF | blue | na |
| chrUn | 7694143 | 7694807 | 665 SAT1_CF  | blue | na |
| chrUn | 7694827 | 7695381 | 555 SAT1_CF  | blue | na |
| chrUn | 7695402 | 7695504 | 103 SAT1_CF  | blue | na |
| chrUn | 7695522 | 7698507 | 2986 SAT1_CF | blue | na |
| chrUn | 7698520 | 7699040 | 521 SAT1_CF  | blue | na |
| chrUn | 7699087 | 7699223 | 137 SAT1_CF  | blue | na |
| chrUn | 7699275 | 7699761 | 487 SAT1_CF  | blue | na |
| chrUn | 7699805 | 7700355 | 551 SAT1_CF  | blue | na |
| chrUn | 7700394 | 7700556 | 163 SAT1_CF  | blue | na |
| chrUn | 7700583 | 7701098 | 516 SAT1_CF  | blue | na |
| chrUn | 7701168 | 7702028 | 861 SAT1_CF  | blue | na |
| chrUn | 7702040 | 7702558 | 519 SAT1_CF  | blue | na |
| chrUn | 7702584 | 7702740 | 157 SAT1_CF  | blue | na |
| chrUn | 7702771 | 7703276 | 506 SAT1_CF  | blue | na |
| chrUn | 7703306 | 7703919 | 614 SAT1_CF  | blue | na |
| chrUn | 7703947 | 7704579 | 633 SAT1_CF  | blue | na |
| chrUn | 7704622 | 7705287 | 666 SAT1_CF  | blue | na |
| chrUn | 7705299 | 7705773 | 475 SAT1_CF  | blue | na |
| chrUn | 7705843 | 7706515 | 673 SAT1_CF  | blue | na |
| chrUn | 7706527 | 7707286 | 760 SAT1_CF  | blue | na |
| chrUn | 7707298 | 7707979 | 682 SAT1_CF  | blue | na |
| chrUn | 7707993 | 7708494 | 502 SAT1_CF  | blue | na |
| chrUn | 7708540 | 7709492 | 953 SAT1_CF  | blue | na |
| chrUn | 7709536 | 7710532 | 997 SAT1_CF  | blue | na |
| chrUn | 7710575 | 7711122 | 548 SAT1_CF  | blue | na |
| chrUn | 7711179 | 7712165 | 987 SAT1_CF  | blue | na |
| chrUn | 7712207 | 7712883 | 677 SAT1_CF  | blue | na |
| chrUn | 7712895 | 7713578 | 684 SAT1_CF  | blue | na |
| chrUn | 7713598 | 7714091 | 494 SAT1_CF  | blue | na |
| chrUn | 7714131 | 7714702 | 572 SAT1_CF  | blue | na |
| chrUn | 7716101 | 7717576 | 1476 SAT1_CF | blue | na |
| chrUn | 7717619 | 7718987 | 1369 SAT1_CF | blue | na |
| chrUn | 7719007 | 7719499 | 493 SAT1_CF  | blue | na |
| chrUn | 7719544 | 7719701 | 158 SAT1_CF  | blue | na |
| chrUn | 7719729 | 7720238 | 510 SAT1_CF  | blue | na |
| chrUn | 7720285 | 7720922 | 638 SAT1_CF  | blue | na |
| chrUn | 7720966 | 7722300 | 1335 SAT1_CF | blue | na |
| chrUn | 7722312 | 7723065 | 754 SAT1_CF  | blue | na |



|       |         |         |              |      |    |
|-------|---------|---------|--------------|------|----|
| chrUn | 7723083 | 7723584 | 502 SAT1_CF  | blue | na |
| chrUn | 7723650 | 7723784 | 135 SAT1_CF  | blue | na |
| chrUn | 7723800 | 7726892 | 3093 SAT1_CF | blue | na |
| chrUn | 7726936 | 7727727 | 792 SAT1_CF  | blue | na |
| chrUn | 7727769 | 7728628 | 860 SAT1_CF  | blue | na |
| chrUn | 7728640 | 7729159 | 520 SAT1_CF  | blue | na |
| chrUn | 7729181 | 7729246 | 66 SAT1_CF   | blue | na |
| chrUn | 7729266 | 7730012 | 747 SAT1_CF  | blue | na |
| chrUn | 7730039 | 7730540 | 502 SAT1_CF  | blue | na |
| chrUn | 7730580 | 7730959 | 380 SAT1_CF  | blue | na |
| chrUn | 7730992 | 7731724 | 733 SAT1_CF  | blue | na |
| chrUn | 7731756 | 7731850 | 95 SAT1_CF   | blue | na |
| chrUn | 7732090 | 7732224 | 135 SAT1_CF  | blue | na |
| chrUn | 7732241 | 7733284 | 1044 SAT1_CF | blue | na |
| chrUn | 7733295 | 7733849 | 555 SAT1_CF  | blue | na |
| chrUn | 7733869 | 7733978 | 110 SAT1_CF  | blue | na |
| chrUn | 7733990 | 7734539 | 550 SAT1_CF  | blue | na |
| chrUn | 7734550 | 7735178 | 629 SAT1_CF  | blue | na |
| chrUn | 7735190 | 7735836 | 647 SAT1_CF  | blue | na |
| chrUn | 7735849 | 7736611 | 763 SAT1_CF  | blue | na |
| chrUn | 7736623 | 7737237 | 615 SAT1_CF  | blue | na |
| chrUn | 7737275 | 7738422 | 1148 SAT1_CF | blue | na |
| chrUn | 7738444 | 7739126 | 683 SAT1_CF  | blue | na |
| chrUn | 7739139 | 7739718 | 580 SAT1_CF  | blue | na |
| chrUn | 7739797 | 7740335 | 539 SAT1_CF  | blue | na |
| chrUn | 7740425 | 7741278 | 854 SAT1_CF  | blue | na |
| chrUn | 7741301 | 7741856 | 556 SAT1_CF  | blue | na |
| chrUn | 7741882 | 7741985 | 104 SAT1_CF  | blue | na |
| chrUn | 7741998 | 7742500 | 503 SAT1_CF  | blue | na |
| chrUn | 7742553 | 7742871 | 319 SAT1_CF  | blue | na |
| chrUn | 7742882 | 7743661 | 780 SAT1_CF  | blue | na |
| chrUn | 7743742 | 7744395 | 654 SAT1_CF  | blue | na |
| chrUn | 7744407 | 7745090 | 684 SAT1_CF  | blue | na |
| chrUn | 7745103 | 7745994 | 892 SAT1_CF  | blue | na |
| chrUn | 7746006 | 7747762 | 1757 SAT1_CF | blue | na |
| chrUn | 7747778 | 7748431 | 654 SAT1_CF  | blue | na |
| chrUn | 7748474 | 7749120 | 647 SAT1_CF  | blue | na |
| chrUn | 7749133 | 7750201 | 1069 SAT1_CF | blue | na |
| chrUn | 7750213 | 7751691 | 1479 SAT1_CF | blue | na |
| chrUn | 7751705 | 7752196 | 492 SAT1_CF  | blue | na |
| chrUn | 7752207 | 7753838 | 1632 SAT1_CF | blue | na |
| chrUn | 7753881 | 7754584 | 704 SAT1_CF  | blue | na |

|       |         |         |              |      |    |
|-------|---------|---------|--------------|------|----|
| chrUn | 7754611 | 7755132 | 522 SAT1_CF  | blue | na |
| chrUn | 7755179 | 7755315 | 137 SAT1_CF  | blue | na |
| chrUn | 7755330 | 7757194 | 1865 SAT1_CF | blue | na |
| chrUn | 7757237 | 7757900 | 664 SAT1_CF  | blue | na |
| chrUn | 7757923 | 7759117 | 1195 SAT1_CF | blue | na |
| chrUn | 7759170 | 7759730 | 561 SAT1_CF  | blue | na |
| chrUn | 7761147 | 7763554 | 2408 SAT1_CF | blue | na |
| chrUn | 7763566 | 7764240 | 675 SAT1_CF  | blue | na |
| chrUn | 7764269 | 7764762 | 494 SAT1_CF  | blue | na |
| chrUn | 7764805 | 7765196 | 392 SAT1_CF  | blue | na |
| chrUn | 7765211 | 7765733 | 523 SAT1_CF  | blue | na |
| chrUn | 7765751 | 7766034 | 284 SAT1_CF  | blue | na |
| chrUn | 7766111 | 7766653 | 543 SAT1_CF  | blue | na |
| chrUn | 7766695 | 7767884 | 1190 SAT1_CF | blue | na |
| chrUn | 7767971 | 7768872 | 902 SAT1_CF  | blue | na |
| chrUn | 7768962 | 7769926 | 965 SAT1_CF  | blue | na |
| chrUn | 7769969 | 7770486 | 518 SAT1_CF  | blue | na |
| chrUn | 7770540 | 7771109 | 570 SAT1_CF  | blue | na |
| chrUn | 7771122 | 7773929 | 2808 SAT1_CF | blue | na |
| chrUn | 7773953 | 7774506 | 554 SAT1_CF  | blue | na |
| chrUn | 7774532 | 7774635 | 104 SAT1_CF  | blue | na |
| chrUn | 7774648 | 7775168 | 521 SAT1_CF  | blue | na |
| chrUn | 7775189 | 7776148 | 960 SAT1_CF  | blue | na |
| chrUn | 7776192 | 7777266 | 1075 SAT1_CF | blue | na |
| chrUn | 7777310 | 7777984 | 675 SAT1_CF  | blue | na |
| chrUn | 7778011 | 7778601 | 591 SAT1_CF  | blue | na |
| chrUn | 7778628 | 7779231 | 604 SAT1_CF  | blue | na |
| chrUn | 7779243 | 7779927 | 685 SAT1_CF  | blue | na |
| chrUn | 7779938 | 7780474 | 537 SAT1_CF  | blue | na |
| chrUn | 7780502 | 7781132 | 631 SAT1_CF  | blue | na |
| chrUn | 7781174 | 7781836 | 663 SAT1_CF  | blue | na |
| chrUn | 7781858 | 7782360 | 503 SAT1_CF  | blue | na |
| chrUn | 7782409 | 7783248 | 840 SAT1_CF  | blue | na |
| chrUn | 7783279 | 7785540 | 2262 SAT1_CF | blue | na |
| chrUn | 7785627 | 7786251 | 625 SAT1_CF  | blue | na |
| chrUn | 7786294 | 7787154 | 861 SAT1_CF  | blue | na |
| chrUn | 7787166 | 7787685 | 520 SAT1_CF  | blue | na |
| chrUn | 7787707 | 7787772 | 66 SAT1_CF   | blue | na |
| chrUn | 7787792 | 7788538 | 747 SAT1_CF  | blue | na |
| chrUn | 7788565 | 7789066 | 502 SAT1_CF  | blue | na |
| chrUn | 7789153 | 7790924 | 1772 SAT1_CF | blue | na |
| chrUn | 7790966 | 7791513 | 548 SAT1_CF  | blue | na |

|       |         |         |              |      |    |
|-------|---------|---------|--------------|------|----|
| chrUn | 7791570 | 7792089 | 520 SAT1_CF  | blue | na |
| chrUn | 7792184 | 7792320 | 137 SAT1_CF  | blue | na |
| chrUn | 7792335 | 7792860 | 526 SAT1_CF  | blue | na |
| chrUn | 7792888 | 7793393 | 506 SAT1_CF  | blue | na |
| chrUn | 7793435 | 7794045 | 611 SAT1_CF  | blue | na |
| chrUn | 7794063 | 7794913 | 851 SAT1_CF  | blue | na |
| chrUn | 7794925 | 7795611 | 687 SAT1_CF  | blue | na |
| chrUn | 7795629 | 7796173 | 545 SAT1_CF  | blue | na |
| chrUn | 7796216 | 7796763 | 548 SAT1_CF  | blue | na |
| chrUn | 7796819 | 7797338 | 520 SAT1_CF  | blue | na |
| chrUn | 7797381 | 7798552 | 1172 SAT1_CF | blue | na |
| chrUn | 7798596 | 7799324 | 729 SAT1_CF  | blue | na |
| chrUn | 7799702 | 7800745 | 1044 SAT1_CF | blue | na |
| chrUn | 7800823 | 7801147 | 325 SAT1_CF  | blue | na |
| chrUn | 7801208 | 7801873 | 666 SAT1_CF  | blue | na |
| chrUn | 7801893 | 7802576 | 684 SAT1_CF  | blue | na |
| chrUn | 7802589 | 7803480 | 892 SAT1_CF  | blue | na |
| chrUn | 7803492 | 7804249 | 758 SAT1_CF  | blue | na |
| chrUn | 7804262 | 7804762 | 501 SAT1_CF  | blue | na |
| chrUn | 7804828 | 7804964 | 137 SAT1_CF  | blue | na |
| chrUn | 7805016 | 7805501 | 486 SAT1_CF  | blue | na |
| chrUn | 7805582 | 7806113 | 532 SAT1_CF  | blue | na |
| chrUn | 7806246 | 7806790 | 545 SAT1_CF  | blue | na |
| chrUn | 7806832 | 7807378 | 547 SAT1_CF  | blue | na |
| chrUn | 7807465 | 7808353 | 889 SAT1_CF  | blue | na |
| chrUn | 7808386 | 7809979 | 1594 SAT1_CF | blue | na |
| chrUn | 7810002 | 7810073 | 72 SAT1_CF   | blue | na |
| chrUn | 7810086 | 7810717 | 632 SAT1_CF  | blue | na |
| chrUn | 7810743 | 7810846 | 104 SAT1_CF  | blue | na |
| chrUn | 7810859 | 7811358 | 500 SAT1_CF  | blue | na |
| chrUn | 7811398 | 7812492 | 1095 SAT1_CF | blue | na |
| chrUn | 7812517 | 7813019 | 503 SAT1_CF  | blue | na |
| chrUn | 7813072 | 7814016 | 945 SAT1_CF  | blue | na |
| chrUn | 7814029 | 7815079 | 1051 SAT1_CF | blue | na |
| chrUn | 7815110 | 7815603 | 494 SAT1_CF  | blue | na |
| chrUn | 7815747 | 7817839 | 2093 SAT1_CF | blue | na |
| chrUn | 7818446 | 7818554 | 109 SAT1_CF  | blue | na |
| chrUn | 7818566 | 7819943 | 1378 SAT1_CF | blue | na |
| chrUn | 7819963 | 7820456 | 494 SAT1_CF  | blue | na |
| chrUn | 7820498 | 7820900 | 403 SAT1_CF  | blue | na |
| chrUn | 7820911 | 7821455 | 545 SAT1_CF  | blue | na |
| chrUn | 7821499 | 7822527 | 1029 SAT1_CF | blue | na |

|       |         |         |              |      |    |
|-------|---------|---------|--------------|------|----|
| chrUn | 7822570 | 7823245 | 676 SAT1_CF  | blue | na |
| chrUn | 7823258 | 7823759 | 502 SAT1_CF  | blue | na |
| chrUn | 7823793 | 7824170 | 378 SAT1_CF  | blue | na |
| chrUn | 7824218 | 7824766 | 549 SAT1_CF  | blue | na |
| chrUn | 7824827 | 7824951 | 125 SAT1_CF  | blue | na |
| chrUn | 7824964 | 7825582 | 619 SAT1_CF  | blue | na |
| chrUn | 7825596 | 7826340 | 745 SAT1_CF  | blue | na |
| chrUn | 7826367 | 7826848 | 482 SAT1_CF  | blue | na |
| chrUn | 7826908 | 7827310 | 403 SAT1_CF  | blue | na |
| chrUn | 7827321 | 7827830 | 510 SAT1_CF  | blue | na |
| chrUn | 7827910 | 7829243 | 1334 SAT1_CF | blue | na |
| chrUn | 7829300 | 7829848 | 549 SAT1_CF  | blue | na |
| chrUn | 7829935 | 7830284 | 350 SAT1_CF  | blue | na |
| chrUn | 7830297 | 7831654 | 1358 SAT1_CF | blue | na |
| chrUn | 7831666 | 7832184 | 519 SAT1_CF  | blue | na |
| chrUn | 7832210 | 7832589 | 380 SAT1_CF  | blue | na |
| chrUn | 7832612 | 7832717 | 106 SAT1_CF  | blue | na |
| chrUn | 7832730 | 7833248 | 519 SAT1_CF  | blue | na |
| chrUn | 7833295 | 7833431 | 137 SAT1_CF  | blue | na |
| chrUn | 7833459 | 7833969 | 511 SAT1_CF  | blue | na |
| chrUn | 7834048 | 7836180 | 2133 SAT1_CF | blue | na |
| chrUn | 7836193 | 7837175 | 983 SAT1_CF  | blue | na |
| chrUn | 7837196 | 7837305 | 110 SAT1_CF  | blue | na |
| chrUn | 7837317 | 7837819 | 503 SAT1_CF  | blue | na |
| chrUn | 7837859 | 7838878 | 1020 SAT1_CF | blue | na |
| chrUn | 7838933 | 7839898 | 966 SAT1_CF  | blue | na |
| chrUn | 7839941 | 7840603 | 663 SAT1_CF  | blue | na |
| chrUn | 7840630 | 7841114 | 485 SAT1_CF  | blue | na |
| chrUn | 7841140 | 7842484 | 1345 SAT1_CF | blue | na |
| chrUn | 7842504 | 7843026 | 523 SAT1_CF  | blue | na |
| chrUn | 7843142 | 7844108 | 967 SAT1_CF  | blue | na |
| chrUn | 7844151 | 7844819 | 669 SAT1_CF  | blue | na |
| chrUn | 7844839 | 7845333 | 495 SAT1_CF  | blue | na |
| chrUn | 7845371 | 7846874 | 1504 SAT1_CF | blue | na |
| chrUn | 7846917 | 7847591 | 675 SAT1_CF  | blue | na |
| chrUn | 7847603 | 7848286 | 684 SAT1_CF  | blue | na |
| chrUn | 7848300 | 7848780 | 481 SAT1_CF  | blue | na |
| chrUn | 7848887 | 7849401 | 515 SAT1_CF  | blue | na |
| chrUn | 7849430 | 7850239 | 810 SAT1_CF  | blue | na |
| chrUn | 7850264 | 7851594 | 1331 SAT1_CF | blue | na |
| chrUn | 7851606 | 7852252 | 647 SAT1_CF  | blue | na |
| chrUn | 7852265 | 7852811 | 547 SAT1_CF  | blue | na |

|       |         |         |              |      |    |
|-------|---------|---------|--------------|------|----|
| chrUn | 7852841 | 7853543 | 703 SAT1_CF  | blue | na |
| chrUn | 7853597 | 7853724 | 128 SAT1_CF  | blue | na |
| chrUn | 7853768 | 7854309 | 542 SAT1_CF  | blue | na |
| chrUn | 7854406 | 7856272 | 1867 SAT1_CF | blue | na |
| chrUn | 7856293 | 7856692 | 400 SAT1_CF  | blue | na |
| chrUn | 7856705 | 7858420 | 1716 SAT1_CF | blue | na |
| chrUn | 7858465 | 7858622 | 158 SAT1_CF  | blue | na |
| chrUn | 7858637 | 7859161 | 525 SAT1_CF  | blue | na |
| chrUn | 7859241 | 7859916 | 676 SAT1_CF  | blue | na |
| chrUn | 7859930 | 7861126 | 1197 SAT1_CF | blue | na |
| chrUn | 7861139 | 7862348 | 1210 SAT1_CF | blue | na |
| chrUn | 7862414 | 7863081 | 668 SAT1_CF  | blue | na |
| chrUn | 7863123 | 7863470 | 348 SAT1_CF  | blue | na |
| chrUn | 7863508 | 7864052 | 545 SAT1_CF  | blue | na |
| chrUn | 7864102 | 7865365 | 1264 SAT1_CF | blue | na |
| chrUn | 7865377 | 7866087 | 711 SAT1_CF  | blue | na |
| chrUn | 7866113 | 7866216 | 104 SAT1_CF  | blue | na |
| chrUn | 7866229 | 7866731 | 503 SAT1_CF  | blue | na |
| chrUn | 7866784 | 7867102 | 319 SAT1_CF  | blue | na |
| chrUn | 7867115 | 7867656 | 542 SAT1_CF  | blue | na |
| chrUn | 7867667 | 7867893 | 227 SAT1_CF  | blue | na |
| chrUn | 7867974 | 7869319 | 1346 SAT1_CF | blue | na |
| chrUn | 7869332 | 7870187 | 856 SAT1_CF  | blue | na |
| chrUn | 7870199 | 7871685 | 1487 SAT1_CF | blue | na |
| chrUn | 7871711 | 7872694 | 984 SAT1_CF  | blue | na |
| chrUn | 7872737 | 7873412 | 676 SAT1_CF  | blue | na |
| chrUn | 7873424 | 7874051 | 628 SAT1_CF  | blue | na |
| chrUn | 7874096 | 7874620 | 525 SAT1_CF  | blue | na |
| chrUn | 7874647 | 7875214 | 568 SAT1_CF  | blue | na |
| chrUn | 7875234 | 7881059 | 5826 CarSat1 | red  | na |
| chrUn | 7881080 | 7881618 | 539 CarSat1  | red  | na |
| chrUn | 7881802 | 7884883 | 3082 CarSat1 | red  | na |
| chrUn | 7886045 | 7887170 | 1126 CarSat1 | red  | na |
| chrUn | 7887197 | 7887907 | 711 CarSat1  | red  | na |
| chrUn | 7887934 | 7888718 | 785 CarSat1  | red  | na |
| chrUn | 7888973 | 7890119 | 1147 CarSat1 | red  | na |
| chrUn | 7890146 | 7890859 | 714 CarSat1  | red  | na |
| chrUn | 7890884 | 7892917 | 2034 CarSat1 | red  | na |
| chrUn | 7892929 | 7895541 | 2613 CarSat1 | red  | na |
| chrUn | 7897126 | 7897555 | 430 CarSat1  | red  | na |
| chrUn | 7897573 | 7898291 | 719 CarSat1  | red  | na |
| chrUn | 7898286 | 7898898 | 613 SAT1_CF  | blue | na |

|       |         |         |              |        |    |
|-------|---------|---------|--------------|--------|----|
| chrUn | 7898918 | 7899437 | 520 SAT1_CF  | blue   | na |
| chrUn | 7899462 | 7900084 | 623 SAT1_CF  | blue   | na |
| chrUn | 7900127 | 7902529 | 2403 SAT1_CF | blue   | na |
| chrUn | 7902531 | 7904476 | 1946 CarSat1 | red    | na |
| chrUn | 7904502 | 7906091 | 1590 CarSat1 | red    | na |
| chrUn | 7906192 | 7906816 | 625 CarSat1  | red    | na |
| chrUn | 7921941 | 7922099 | 159 Sat2CF   | purple | na |
| chrUn | 7921962 | 7922655 | 694 Sat2CF   | purple | na |
| chrUn | 7922549 | 7922697 | 149 Sat2CF   | purple | na |
| chrUn | 7922549 | 7922697 | 149 Sat2CF   | purple | na |
| chrUn | 7953011 | 7954160 | 1150 Sat2CF  | purple | na |
| chrUn | 7953145 | 7954138 | 994 Sat2CF   | purple | na |
| chrUn | 7974630 | 7974792 | 163 Sat2CF   | purple | na |
| chrUn | 7974658 | 7975373 | 716 Sat2CF   | purple | na |
| chrUn | 7975247 | 7975395 | 149 Sat2CF   | purple | na |
| chrUn | 7975247 | 7975395 | 149 Sat2CF   | purple | na |
| chrUn | 7991856 | 7993024 | 1169 Sat2CF  | purple | na |
| chrUn | 7992846 | 7993055 | 210 Sat2CF   | purple | na |
| chrUn | 8007741 | 8008528 | 788 Sat2CF   | purple | na |
| chrUn | 8020422 | 8021598 | 1177 Sat2CF  | purple | na |
| chrUn | 8047292 | 8047537 | 246 Sat2CF   | purple | na |
| chrUn | 8048103 | 8048243 | 141 Sat2CF   | purple | na |
| chrUn | 8066287 | 8067422 | 1136 Sat2CF  | purple | na |
| chrUn | 8086534 | 8087452 | 919 Sat2CF   | purple | na |
| chrUn | 8086670 | 8087406 | 737 Sat2CF   | purple | na |
| chrUn | 8127051 | 8128268 | 1218 Sat2CF  | purple | na |
| chrUn | 8127179 | 8128263 | 1085 Sat2CF  | purple | na |
| chrUn | 8128139 | 8128288 | 150 Sat2CF   | purple | na |
| chrUn | 8149921 | 8150658 | 738 Sat2CF   | purple | na |
| chrUn | 8149995 | 8150656 | 662 Sat2CF   | purple | na |
| chrUn | 8206904 | 8207066 | 163 Sat2CF   | purple | na |
| chrUn | 8206930 | 8207778 | 849 Sat2CF   | purple | na |
| chrUn | 8207111 | 8207859 | 749 Sat2CF   | purple | na |
| chrUn | 8225662 | 8226839 | 1178 Sat2CF  | purple | na |
| chrUn | 8226682 | 8226830 | 149 Sat2CF   | purple | na |
| chrUn | 8266007 | 8267234 | 1228 Sat2CF  | purple | na |
| chrUn | 8266140 | 8267162 | 1023 Sat2CF  | purple | na |
| chrUn | 8266072 | 8266373 | 302 Sat2CF   | purple | na |
| chrUn | 8285554 | 8286362 | 809 Sat2CF   | purple | na |
| chrUn | 8286590 | 8286721 | 132 Sat2CF   | purple | na |
| chrUn | 8286592 | 8286752 | 161 Sat2CF   | purple | na |
| chrUn | 8286595 | 8286795 | 201 Sat2CF   | purple | na |

|       |         |         |              |        |    |
|-------|---------|---------|--------------|--------|----|
| chrUn | 8315790 | 8316967 | 1178 Sat2CF  | purple | na |
| chrUn | 8330589 | 8331662 | 1074 Sat2CF  | purple | na |
| chrUn | 8358161 | 8359314 | 1154 Sat2CF  | purple | na |
| chrUn | 8384166 | 8385383 | 1218 Sat2CF  | purple | na |
| chrUn | 8415201 | 8416115 | 915 Sat2CF   | purple | na |
| chrUn | 8415268 | 8416077 | 810 Sat2CF   | purple | na |
| chrUn | 8444758 | 8445969 | 1212 Sat2CF  | purple | na |
| chrUn | 8445811 | 8445990 | 180 Sat2CF   | purple | na |
| chrUn | 8461958 | 8462606 | 649 Sat2CF   | purple | na |
| chrUn | 8462032 | 8462695 | 664 Sat2CF   | purple | na |
| chrUn | 8480907 | 8481792 | 886 Sat2CF   | purple | na |
| chrUn | 8481042 | 8481776 | 735 Sat2CF   | purple | na |
| chrUn | 8497123 | 8497285 | 163 Sat2CF   | purple | na |
| chrUn | 8497151 | 8497933 | 783 Sat2CF   | purple | na |
| chrUn | 8506153 | 8507229 | 1077 Sat2CF  | purple | na |
| chrUn | 8507106 | 8507254 | 149 Sat2CF   | purple | na |
| chrUn | 8520227 | 8521457 | 1231 Sat2CF  | purple | na |
| chrUn | 8568093 | 8569272 | 1180 Sat2CF  | purple | na |
| chrUn | 8592442 | 8592786 | 345 Sat2CF   | purple | na |
| chrUn | 8592501 | 8593291 | 791 Sat2CF   | purple | na |
| chrUn | 8592965 | 8593328 | 364 Sat2CF   | purple | na |
| chrUn | 8612332 | 8613465 | 1134 Sat2CF  | purple | na |
| chrUn | 8651540 | 8652772 | 1233 Sat2CF  | purple | na |
| chrUn | 8651650 | 8652736 | 1087 Sat2CF  | purple | na |
| chrUn | 8700250 | 8701069 | 820 Sat2CF   | purple | na |
| chrUn | 8700328 | 8701048 | 721 Sat2CF   | purple | na |
| chrUn | 8700939 | 8701106 | 168 Sat2CF   | purple | na |
| chrUn | 8724849 | 8726081 | 1233 Sat2CF  | purple | na |
| chrUn | 8741103 | 8742236 | 1134 Sat2CF  | purple | na |
| chrUn | 8741235 | 8742324 | 1090 Sat2CF  | purple | na |
| chrUn | 8742197 | 8742343 | 147 Sat2CF   | purple | na |
| chrUn | 8769635 | 8770879 | 1245 SAT1_CF | blue   | na |
| chrUn | 8770915 | 8771433 | 519 SAT1_CF  | blue   | na |
| chrUn | 8771446 | 8771949 | 504 SAT1_CF  | blue   | na |
| chrUn | 8771967 | 8774007 | 2041 SAT1_CF | blue   | na |
| chrUn | 8850780 | 8850852 | 73 Carsat3   | green  | na |
| chrUn | 9235036 | 9236134 | 1099 Sat7CF  | lime   | na |
| chrUn | 9275813 | 9276769 | 957 Sat7CF   | lime   | na |
| chrUn | 9602218 | 9603180 | 963 SAT1_CF  | blue   | na |
| chrUn | 9603223 | 9603902 | 680 SAT1_CF  | blue   | na |
| chrUn | 9603914 | 9606071 | 2158 SAT1_CF | blue   | na |
| chrUn | 9606098 | 9607570 | 1473 SAT1_CF | blue   | na |

|       |         |         |              |      |    |
|-------|---------|---------|--------------|------|----|
| chrUn | 9607619 | 9607786 | 168 SAT1_CF  | blue | na |
| chrUn | 9607798 | 9608473 | 676 SAT1_CF  | blue | na |
| chrUn | 9608485 | 9608699 | 215 SAT1_CF  | blue | na |
| chrUn | 9608898 | 9611216 | 2319 SAT1_CF | blue | na |
| chrUn | 9611228 | 9611786 | 559 SAT1_CF  | blue | na |
| chrUn | 9611806 | 9611914 | 109 SAT1_CF  | blue | na |
| chrUn | 9611927 | 9612447 | 521 SAT1_CF  | blue | na |
| chrUn | 9612464 | 9612649 | 186 SAT1_CF  | blue | na |
| chrUn | 9612831 | 9612996 | 166 SAT1_CF  | blue | na |
| chrUn | 9613038 | 9614474 | 1437 SAT1_CF | blue | na |
| chrUn | 9614554 | 9615645 | 1092 SAT1_CF | blue | na |
| chrUn | 9615689 | 9616363 | 675 SAT1_CF  | blue | na |
| chrUn | 9616375 | 9617058 | 684 SAT1_CF  | blue | na |
| chrUn | 9617072 | 9617561 | 490 SAT1_CF  | blue | na |
| chrUn | 9617601 | 9618983 | 1383 SAT1_CF | blue | na |
| chrUn | 9619027 | 9619669 | 643 SAT1_CF  | blue | na |
| chrUn | 9619683 | 9620221 | 539 SAT1_CF  | blue | na |
| chrUn | 9620232 | 9620356 | 125 SAT1_CF  | blue | na |
| chrUn | 9620368 | 9621051 | 684 SAT1_CF  | blue | na |
| chrUn | 9621065 | 9621557 | 493 SAT1_CF  | blue | na |
| chrUn | 9621568 | 9623948 | 2381 SAT1_CF | blue | na |
| chrUn | 9623970 | 9624491 | 522 SAT1_CF  | blue | na |
| chrUn | 9624538 | 9624674 | 137 SAT1_CF  | blue | na |
| chrUn | 9624702 | 9625214 | 513 SAT1_CF  | blue | na |
| chrUn | 9625232 | 9625895 | 664 SAT1_CF  | blue | na |
| chrUn | 9625923 | 9626552 | 630 SAT1_CF  | blue | na |
| chrUn | 9626595 | 9627261 | 667 SAT1_CF  | blue | na |
| chrUn | 9627284 | 9627966 | 683 SAT1_CF  | blue | na |
| chrUn | 9627986 | 9628479 | 494 SAT1_CF  | blue | na |
| chrUn | 9628532 | 9629092 | 561 SAT1_CF  | blue | na |
| chrUn | 9630492 | 9631086 | 595 SAT1_CF  | blue | na |
| chrUn | 9631135 | 9632154 | 1020 SAT1_CF | blue | na |
| chrUn | 9632176 | 9632676 | 501 SAT1_CF  | blue | na |
| chrUn | 9632719 | 9633197 | 479 SAT1_CF  | blue | na |
| chrUn | 9633487 | 9634071 | 585 SAT1_CF  | blue | na |
| chrUn | 9634098 | 9635112 | 1015 SAT1_CF | blue | na |
| chrUn | 9635125 | 9635607 | 483 SAT1_CF  | blue | na |
| chrUn | 9635667 | 9636963 | 1297 SAT1_CF | blue | na |
| chrUn | 9636978 | 9637522 | 545 SAT1_CF  | blue | na |
| chrUn | 9637563 | 9639067 | 1505 SAT1_CF | blue | na |
| chrUn | 9639088 | 9639196 | 109 SAT1_CF  | blue | na |
| chrUn | 9639210 | 9639689 | 480 SAT1_CF  | blue | na |



|       |         |         |              |      |    |
|-------|---------|---------|--------------|------|----|
| chrUn | 9639745 | 9640115 | 371 SAT1_CF  | blue | na |
| chrUn | 9640160 | 9641055 | 896 SAT1_CF  | blue | na |
| chrUn | 9641068 | 9642376 | 1309 SAT1_CF | blue | na |
| chrUn | 9642396 | 9642505 | 110 SAT1_CF  | blue | na |
| chrUn | 9642517 | 9643202 | 686 SAT1_CF  | blue | na |
| chrUn | 9643214 | 9643733 | 520 SAT1_CF  | blue | na |
| chrUn | 9643752 | 9644237 | 486 SAT1_CF  | blue | na |
| chrUn | 9644255 | 9644899 | 645 SAT1_CF  | blue | na |
| chrUn | 9644958 | 9646163 | 1206 SAT1_CF | blue | na |
| chrUn | 9646207 | 9646751 | 545 SAT1_CF  | blue | na |
| chrUn | 9646800 | 9646967 | 168 SAT1_CF  | blue | na |
| chrUn | 9646979 | 9647650 | 672 SAT1_CF  | blue | na |
| chrUn | 9647663 | 9648144 | 482 SAT1_CF  | blue | na |
| chrUn | 9648170 | 9649033 | 864 SAT1_CF  | blue | na |
| chrUn | 9649073 | 9650032 | 960 SAT1_CF  | blue | na |
| chrUn | 9650111 | 9651150 | 1040 SAT1_CF | blue | na |
| chrUn | 9651199 | 9651867 | 669 SAT1_CF  | blue | na |
| chrUn | 9651894 | 9652482 | 589 SAT1_CF  | blue | na |
| chrUn | 9652509 | 9653112 | 604 SAT1_CF  | blue | na |
| chrUn | 9653124 | 9654219 | 1096 SAT1_CF | blue | na |
| chrUn | 9654261 | 9654935 | 675 SAT1_CF  | blue | na |
| chrUn | 9654947 | 9655467 | 521 SAT1_CF  | blue | na |
| chrUn | 9655488 | 9657270 | 1783 SAT1_CF | blue | na |
| chrUn | 9657312 | 9658042 | 731 SAT1_CF  | blue | na |
| chrUn | 9658065 | 9658882 | 818 SAT1_CF  | blue | na |
| chrUn | 9659108 | 9659712 | 605 SAT1_CF  | blue | na |
| chrUn | 9659725 | 9660476 | 752 SAT1_CF  | blue | na |
| chrUn | 9660498 | 9661079 | 582 SAT1_CF  | blue | na |
| chrUn | 9661091 | 9661555 | 465 SAT1_CF  | blue | na |
| chrUn | 9661566 | 9662248 | 683 SAT1_CF  | blue | na |
| chrUn | 9662271 | 9662741 | 471 SAT1_CF  | blue | na |
| chrUn | 9662816 | 9662983 | 168 SAT1_CF  | blue | na |
| chrUn | 9663164 | 9663956 | 793 SAT1_CF  | blue | na |
| chrUn | 9664000 | 9664785 | 786 SAT1_CF  | blue | na |
| chrUn | 9664827 | 9665053 | 227 SAT1_CF  | blue | na |
| chrUn | 9665066 | 9665732 | 667 SAT1_CF  | blue | na |
| chrUn | 9665759 | 9666260 | 502 SAT1_CF  | blue | na |
| chrUn | 9666296 | 9669060 | 2765 SAT1_CF | blue | na |
| chrUn | 9669072 | 9669574 | 503 SAT1_CF  | blue | na |
| chrUn | 9669619 | 9669776 | 158 SAT1_CF  | blue | na |
| chrUn | 9669827 | 9670313 | 487 SAT1_CF  | blue | na |
| chrUn | 9670344 | 9671803 | 1460 SAT1_CF | blue | na |

|       |         |         |              |      |    |
|-------|---------|---------|--------------|------|----|
| chrUn | 9671815 | 9672368 | 554 SAT1_CF  | blue | na |
| chrUn | 9672389 | 9672496 | 108 SAT1_CF  | blue | na |
| chrUn | 9672509 | 9673008 | 500 SAT1_CF  | blue | na |
| chrUn | 9673051 | 9675769 | 2719 SAT1_CF | blue | na |
| chrUn | 9675781 | 9676336 | 556 SAT1_CF  | blue | na |
| chrUn | 9676359 | 9677176 | 818 SAT1_CF  | blue | na |
| chrUn | 9677402 | 9678006 | 605 SAT1_CF  | blue | na |
| chrUn | 9678019 | 9678762 | 744 SAT1_CF  | blue | na |
| chrUn | 9678792 | 9679373 | 582 SAT1_CF  | blue | na |
| chrUn | 9679385 | 9679849 | 465 SAT1_CF  | blue | na |
| chrUn | 9679860 | 9680542 | 683 SAT1_CF  | blue | na |
| chrUn | 9680565 | 9681035 | 471 SAT1_CF  | blue | na |
| chrUn | 9681096 | 9681277 | 182 SAT1_CF  | blue | na |
| chrUn | 9681458 | 9683042 | 1585 SAT1_CF | blue | na |
| chrUn | 9683084 | 9683310 | 227 SAT1_CF  | blue | na |
| chrUn | 9683323 | 9683989 | 667 SAT1_CF  | blue | na |
| chrUn | 9684016 | 9684284 | 269 SAT1_CF  | blue | na |
| chrUn | 9684314 | 9684385 | 72 SAT1_CF   | blue | na |
| chrUn | 9684397 | 9685070 | 674 SAT1_CF  | blue | na |
| chrUn | 9685082 | 9685767 | 686 SAT1_CF  | blue | na |
| chrUn | 9685779 | 9686332 | 554 SAT1_CF  | blue | na |
| chrUn | 9686411 | 9686771 | 361 SAT1_CF  | blue | na |
| chrUn | 9686796 | 9687338 | 543 SAT1_CF  | blue | na |
| chrUn | 9687435 | 9687982 | 548 SAT1_CF  | blue | na |
| chrUn | 9688039 | 9688563 | 525 SAT1_CF  | blue | na |
| chrUn | 9688586 | 9689733 | 1148 SAT1_CF | blue | na |
| chrUn | 9689776 | 9692156 | 2381 SAT1_CF | blue | na |
| chrUn | 9692169 | 9692688 | 520 SAT1_CF  | blue | na |
| chrUn | 9692709 | 9692890 | 182 SAT1_CF  | blue | na |
| chrUn | 9693072 | 9693928 | 857 SAT1_CF  | blue | na |
| chrUn | 9693985 | 9695108 | 1124 SAT1_CF | blue | na |
| chrUn | 9695121 | 9695874 | 754 SAT1_CF  | blue | na |
| chrUn | 9695896 | 9696396 | 501 SAT1_CF  | blue | na |
| chrUn | 9696443 | 9696600 | 158 SAT1_CF  | blue | na |
| chrUn | 9696622 | 9697809 | 1188 SAT1_CF | blue | na |
| chrUn | 9697843 | 9698881 | 1039 SAT1_CF | blue | na |
| chrUn | 9698903 | 9699006 | 104 SAT1_CF  | blue | na |
| chrUn | 9699019 | 9699719 | 701 SAT1_CF  | blue | na |
| chrUn | 9699734 | 9700259 | 526 SAT1_CF  | blue | na |
| chrUn | 9700302 | 9700828 | 527 SAT1_CF  | blue | na |
| chrUn | 9700872 | 9701413 | 542 SAT1_CF  | blue | na |
| chrUn | 9701455 | 9702305 | 851 SAT1_CF  | blue | na |

|       |         |         |              |      |    |
|-------|---------|---------|--------------|------|----|
| chrUn | 9702317 | 9702793 | 477 SAT1_CF  | blue | na |
| chrUn | 9702863 | 9703536 | 674 SAT1_CF  | blue | na |
| chrUn | 9703548 | 9704983 | 1436 SAT1_CF | blue | na |
| chrUn | 9704995 | 9705698 | 704 SAT1_CF  | blue | na |
| chrUn | 9705711 | 9706546 | 836 SAT1_CF  | blue | na |
| chrUn | 9706559 | 9707875 | 1317 SAT1_CF | blue | na |
| chrUn | 9707887 | 9708401 | 515 SAT1_CF  | blue | na |
| chrUn | 9708427 | 9708962 | 536 SAT1_CF  | blue | na |
| chrUn | 9709007 | 9709733 | 727 SAT1_CF  | blue | na |
| chrUn | 9709776 | 9710452 | 677 SAT1_CF  | blue | na |
| chrUn | 9710464 | 9711065 | 602 SAT1_CF  | blue | na |
| chrUn | 9711079 | 9711757 | 679 SAT1_CF  | blue | na |
| chrUn | 9711769 | 9713198 | 1430 SAT1_CF | blue | na |
| chrUn | 9713265 | 9714229 | 965 SAT1_CF  | blue | na |
| chrUn | 9714249 | 9714818 | 570 SAT1_CF  | blue | na |
| chrUn | 9714840 | 9715644 | 805 SAT1_CF  | blue | na |
| chrUn | 9715656 | 9716158 | 503 SAT1_CF  | blue | na |
| chrUn | 9716203 | 9716360 | 158 SAT1_CF  | blue | na |
| chrUn | 9716375 | 9716899 | 525 SAT1_CF  | blue | na |
| chrUn | 9716979 | 9717542 | 564 SAT1_CF  | blue | na |
| chrUn | 9717586 | 9718920 | 1335 SAT1_CF | blue | na |
| chrUn | 9718932 | 9719485 | 554 SAT1_CF  | blue | na |
| chrUn | 9719506 | 9719614 | 109 SAT1_CF  | blue | na |
| chrUn | 9719634 | 9720128 | 495 SAT1_CF  | blue | na |
| chrUn | 9720185 | 9720745 | 561 SAT1_CF  | blue | na |
| chrUn | 9722156 | 9723215 | 1060 SAT1_CF | blue | na |
| chrUn | 9723250 | 9723910 | 661 SAT1_CF  | blue | na |
| chrUn | 9723952 | 9724478 | 527 SAT1_CF  | blue | na |
| chrUn | 9724493 | 9726354 | 1862 SAT1_CF | blue | na |
| chrUn | 9726398 | 9727075 | 678 SAT1_CF  | blue | na |
| chrUn | 9727087 | 9727589 | 503 SAT1_CF  | blue | na |
| chrUn | 9727634 | 9727791 | 158 SAT1_CF  | blue | na |
| chrUn | 9727842 | 9728328 | 487 SAT1_CF  | blue | na |
| chrUn | 9728359 | 9729818 | 1460 SAT1_CF | blue | na |
| chrUn | 9729830 | 9730385 | 556 SAT1_CF  | blue | na |
| chrUn | 9730406 | 9730513 | 108 SAT1_CF  | blue | na |
| chrUn | 9730526 | 9731025 | 500 SAT1_CF  | blue | na |
| chrUn | 9731112 | 9733825 | 2714 SAT1_CF | blue | na |
| chrUn | 9733837 | 9734444 | 608 SAT1_CF  | blue | na |
| chrUn | 9734456 | 9735296 | 841 SAT1_CF  | blue | na |
| chrUn | 9735309 | 9735809 | 501 SAT1_CF  | blue | na |
| chrUn | 9735847 | 9737014 | 1168 SAT1_CF | blue | na |

|       |         |         |              |      |    |
|-------|---------|---------|--------------|------|----|
| chrUn | 9737025 | 9737545 | 521 SAT1_CF  | blue | na |
| chrUn | 9737564 | 9737823 | 260 SAT1_CF  | blue | na |
| chrUn | 9737868 | 9738430 | 563 SAT1_CF  | blue | na |
| chrUn | 9738474 | 9739732 | 1259 SAT1_CF | blue | na |
| chrUn | 9739811 | 9741219 | 1409 SAT1_CF | blue | na |
| chrUn | 9741231 | 9741745 | 515 SAT1_CF  | blue | na |
| chrUn | 9741766 | 9741839 | 74 SAT1_CF   | blue | na |
| chrUn | 9741852 | 9742553 | 702 SAT1_CF  | blue | na |
| chrUn | 9742568 | 9743092 | 525 SAT1_CF  | blue | na |
| chrUn | 9743171 | 9745039 | 1869 SAT1_CF | blue | na |
| chrUn | 9745060 | 9745167 | 108 SAT1_CF  | blue | na |
| chrUn | 9745180 | 9745679 | 500 SAT1_CF  | blue | na |
| chrUn | 9745766 | 9748442 | 2677 SAT1_CF | blue | na |
| chrUn | 9748454 | 9749061 | 608 SAT1_CF  | blue | na |
| chrUn | 9749073 | 9750401 | 1329 SAT1_CF | blue | na |
| chrUn | 9750480 | 9752200 | 1721 SAT1_CF | blue | na |
| chrUn | 9752212 | 9752896 | 685 SAT1_CF  | blue | na |
| chrUn | 9752909 | 9753409 | 501 SAT1_CF  | blue | na |
| chrUn | 9753447 | 9754614 | 1168 SAT1_CF | blue | na |
| chrUn | 9754625 | 9755145 | 521 SAT1_CF  | blue | na |
| chrUn | 9755164 | 9755423 | 260 SAT1_CF  | blue | na |
| chrUn | 9755468 | 9756152 | 685 SAT1_CF  | blue | na |
| chrUn | 9756163 | 9757613 | 1451 SAT1_CF | blue | na |
| chrUn | 9757655 | 9758496 | 842 SAT1_CF  | blue | na |
| chrUn | 9758509 | 9759063 | 555 SAT1_CF  | blue | na |
| chrUn | 9759084 | 9759192 | 109 SAT1_CF  | blue | na |
| chrUn | 9759205 | 9759707 | 503 SAT1_CF  | blue | na |
| chrUn | 9759747 | 9760666 | 920 SAT1_CF  | blue | na |
| chrUn | 9760710 | 9762356 | 1647 SAT1_CF | blue | na |
| chrUn | 9762369 | 9762998 | 630 SAT1_CF  | blue | na |
| chrUn | 9763021 | 9763127 | 107 SAT1_CF  | blue | na |
| chrUn | 9763140 | 9763976 | 837 SAT1_CF  | blue | na |
| chrUn | 9763988 | 9765392 | 1405 SAT1_CF | blue | na |
| chrUn | 9765422 | 9766332 | 911 SAT1_CF  | blue | na |
| chrUn | 9766344 | 9766967 | 624 SAT1_CF  | blue | na |
| chrUn | 9767053 | 9767518 | 466 SAT1_CF  | blue | na |
| chrUn | 9767544 | 9768151 | 608 SAT1_CF  | blue | na |
| chrUn | 9768162 | 9768960 | 799 SAT1_CF  | blue | na |
| chrUn | 9768972 | 9770169 | 1198 SAT1_CF | blue | na |
| chrUn | 9770209 | 9772280 | 2072 SAT1_CF | blue | na |
| chrUn | 9772328 | 9772988 | 661 SAT1_CF  | blue | na |
| chrUn | 9773022 | 9773515 | 494 SAT1_CF  | blue | na |

|       |         |         |              |      |    |
|-------|---------|---------|--------------|------|----|
| chrUn | 9773551 | 9773924 | 374 SAT1_CF  | blue | na |
| chrUn | 9773967 | 9775583 | 1617 SAT1_CF | blue | na |
| chrUn | 9775595 | 9776417 | 823 SAT1_CF  | blue | na |
| chrUn | 9776429 | 9777114 | 686 SAT1_CF  | blue | na |
| chrUn | 9777126 | 9777589 | 464 SAT1_CF  | blue | na |
| chrUn | 9777659 | 9778328 | 670 SAT1_CF  | blue | na |
| chrUn | 9778346 | 9778845 | 500 SAT1_CF  | blue | na |
| chrUn | 9778932 | 9779818 | 887 SAT1_CF  | blue | na |
| chrUn | 9779839 | 9780264 | 426 SAT1_CF  | blue | na |
| chrUn | 9780306 | 9781637 | 1332 SAT1_CF | blue | na |
| chrUn | 9781649 | 9782332 | 684 SAT1_CF  | blue | na |
| chrUn | 9782346 | 9783405 | 1060 SAT1_CF | blue | na |
| chrUn | 9783434 | 9784200 | 767 SAT1_CF  | blue | na |
| chrUn | 9784304 | 9785603 | 1300 SAT1_CF | blue | na |
| chrUn | 9785615 | 9786168 | 554 SAT1_CF  | blue | na |
| chrUn | 9786190 | 9786297 | 108 SAT1_CF  | blue | na |
| chrUn | 9786310 | 9787015 | 706 SAT1_CF  | blue | na |
| chrUn | 9787043 | 9790365 | 3323 SAT1_CF | blue | na |
| chrUn | 9790385 | 9791515 | 1131 SAT1_CF | blue | na |
| chrUn | 9791536 | 9792467 | 932 SAT1_CF  | blue | na |
| chrUn | 9792489 | 9793391 | 903 SAT1_CF  | blue | na |
| chrUn | 9793433 | 9795048 | 1616 SAT1_CF | blue | na |
| chrUn | 9795104 | 9795703 | 600 SAT1_CF  | blue | na |
| chrUn | 9795721 | 9796223 | 503 SAT1_CF  | blue | na |
| chrUn | 9796268 | 9798119 | 1852 SAT1_CF | blue | na |
| chrUn | 9798161 | 9799322 | 1162 SAT1_CF | blue | na |
| chrUn | 9799335 | 9800395 | 1061 SAT1_CF | blue | na |
| chrUn | 9800407 | 9800708 | 302 SAT1_CF  | blue | na |
| chrUn | 9800754 | 9801300 | 547 SAT1_CF  | blue | na |
| chrUn | 9801463 | 9801980 | 518 SAT1_CF  | blue | na |
| chrUn | 9801994 | 9802792 | 799 SAT1_CF  | blue | na |
| chrUn | 9802812 | 9803571 | 760 SAT1_CF  | blue | na |
| chrUn | 9803585 | 9804264 | 680 SAT1_CF  | blue | na |
| chrUn | 9804277 | 9804797 | 521 SAT1_CF  | blue | na |
| chrUn | 9804865 | 9805257 | 393 SAT1_CF  | blue | na |
| chrUn | 9805373 | 9806144 | 772 SAT1_CF  | blue | na |
| chrUn | 9806223 | 9806919 | 697 SAT1_CF  | blue | na |
| chrUn | 9807016 | 9808235 | 1220 SAT1_CF | blue | na |
| chrUn | 9808249 | 9810065 | 1817 SAT1_CF | blue | na |
| chrUn | 9810079 | 9810969 | 891 SAT1_CF  | blue | na |
| chrUn | 9811012 | 9812446 | 1435 SAT1_CF | blue | na |
| chrUn | 9812474 | 9813016 | 543 SAT1_CF  | blue | na |

|       |         |         |              |      |    |
|-------|---------|---------|--------------|------|----|
| chrUn | 9813059 | 9813735 | 677 SAT1_CF  | blue | na |
| chrUn | 9813747 | 9814570 | 824 SAT1_CF  | blue | na |
| chrUn | 9814590 | 9815085 | 496 SAT1_CF  | blue | na |
| chrUn | 9815171 | 9816670 | 1500 SAT1_CF | blue | na |
| chrUn | 9816682 | 9817328 | 647 SAT1_CF  | blue | na |
| chrUn | 9817341 | 9818269 | 929 SAT1_CF  | blue | na |
| chrUn | 9818281 | 9818961 | 681 SAT1_CF  | blue | na |
| chrUn | 9818973 | 9819604 | 632 SAT1_CF  | blue | na |
| chrUn | 9819627 | 9819732 | 106 SAT1_CF  | blue | na |
| chrUn | 9819745 | 9820323 | 579 SAT1_CF  | blue | na |
| chrUn | 9820403 | 9821962 | 1560 SAT1_CF | blue | na |
| chrUn | 9822013 | 9822864 | 852 SAT1_CF  | blue | na |
| chrUn | 9822876 | 9823489 | 614 SAT1_CF  | blue | na |
| chrUn | 9823503 | 9824247 | 745 SAT1_CF  | blue | na |
| chrUn | 9824274 | 9824775 | 502 SAT1_CF  | blue | na |
| chrUn | 9824862 | 9825217 | 356 SAT1_CF  | blue | na |
| chrUn | 9825228 | 9826636 | 1409 SAT1_CF | blue | na |
| chrUn | 9826678 | 9827225 | 548 SAT1_CF  | blue | na |
| chrUn | 9827282 | 9827799 | 518 SAT1_CF  | blue | na |
| chrUn | 9827811 | 9828237 | 427 SAT1_CF  | blue | na |
| chrUn | 9828280 | 9828828 | 549 SAT1_CF  | blue | na |
| chrUn | 9828850 | 9831076 | 2227 SAT1_CF | blue | na |
| chrUn | 9831107 | 9831505 | 399 SAT1_CF  | blue | na |
| chrUn | 9831525 | 9832049 | 525 SAT1_CF  | blue | na |
| chrUn | 9832165 | 9833131 | 967 SAT1_CF  | blue | na |
| chrUn | 9833174 | 9833839 | 666 SAT1_CF  | blue | na |
| chrUn | 9833859 | 9834352 | 494 SAT1_CF  | blue | na |
| chrUn | 9834392 | 9836250 | 1859 SAT1_CF | blue | na |
| chrUn | 9836270 | 9836763 | 494 SAT1_CF  | blue | na |
| chrUn | 9836803 | 9837726 | 924 SAT1_CF  | blue | na |
| chrUn | 9837754 | 9838661 | 908 SAT1_CF  | blue | na |
| chrUn | 9838681 | 9839174 | 494 SAT1_CF  | blue | na |
| chrUn | 9839237 | 9839582 | 346 SAT1_CF  | blue | na |
| chrUn | 9839626 | 9840137 | 512 SAT1_CF  | blue | na |
| chrUn | 9840165 | 9841075 | 911 SAT1_CF  | blue | na |
| chrUn | 9841087 | 9842289 | 1203 SAT1_CF | blue | na |
| chrUn | 9842334 | 9842846 | 513 SAT1_CF  | blue | na |
| chrUn | 9842927 | 9843742 | 816 SAT1_CF  | blue | na |
| chrUn | 9843784 | 9844642 | 859 SAT1_CF  | blue | na |
| chrUn | 9844654 | 9845336 | 683 SAT1_CF  | blue | na |
| chrUn | 9845349 | 9845847 | 499 SAT1_CF  | blue | na |
| chrUn | 9845895 | 9846291 | 397 SAT1_CF  | blue | na |

|       |         |         |              |      |    |
|-------|---------|---------|--------------|------|----|
| chrUn | 9846304 | 9846847 | 544 SAT1_CF  | blue | na |
| chrUn | 9846926 | 9847890 | 965 SAT1_CF  | blue | na |
| chrUn | 9847933 | 9848608 | 676 SAT1_CF  | blue | na |
| chrUn | 9848620 | 9849946 | 1327 SAT1_CF | blue | na |
| chrUn | 9850005 | 9850791 | 787 SAT1_CF  | blue | na |
| chrUn | 9850819 | 9852669 | 1851 SAT1_CF | blue | na |
| chrUn | 9852712 | 9853255 | 544 SAT1_CF  | blue | na |
| chrUn | 9853281 | 9854078 | 798 SAT1_CF  | blue | na |
| chrUn | 9854091 | 9854591 | 501 SAT1_CF  | blue | na |
| chrUn | 9854631 | 9854814 | 184 SAT1_CF  | blue | na |
| chrUn | 9854994 | 9855896 | 903 SAT1_CF  | blue | na |
| chrUn | 9855923 | 9856017 | 95 SAT1_CF   | blue | na |
| chrUn | 9856029 | 9856706 | 678 SAT1_CF  | blue | na |
| chrUn | 9856720 | 9857896 | 1177 SAT1_CF | blue | na |
| chrUn | 9857980 | 9858116 | 137 SAT1_CF  | blue | na |
| chrUn | 9858131 | 9859456 | 1326 SAT1_CF | blue | na |
| chrUn | 9859469 | 9859969 | 501 SAT1_CF  | blue | na |
| chrUn | 9860056 | 9860584 | 529 SAT1_CF  | blue | na |
| chrUn | 9860604 | 9861880 | 1277 SAT1_CF | blue | na |
| chrUn | 9861922 | 9862653 | 732 SAT1_CF  | blue | na |
| chrUn | 9862673 | 9862780 | 108 SAT1_CF  | blue | na |
| chrUn | 9862792 | 9863478 | 687 SAT1_CF  | blue | na |
| chrUn | 9863490 | 9864009 | 520 SAT1_CF  | blue | na |
| chrUn | 9864028 | 9864513 | 486 SAT1_CF  | blue | na |
| chrUn | 9864531 | 9865305 | 775 SAT1_CF  | blue | na |
| chrUn | 9865317 | 9865871 | 555 SAT1_CF  | blue | na |
| chrUn | 9865915 | 9866441 | 527 SAT1_CF  | blue | na |
| chrUn | 9866485 | 9867029 | 545 SAT1_CF  | blue | na |
| chrUn | 9867079 | 9867246 | 168 SAT1_CF  | blue | na |
| chrUn | 9867258 | 9867930 | 673 SAT1_CF  | blue | na |
| chrUn | 9867943 | 9869313 | 1371 SAT1_CF | blue | na |
| chrUn | 9869353 | 9869754 | 402 SAT1_CF  | blue | na |
| chrUn | 9869765 | 9870302 | 538 SAT1_CF  | blue | na |
| chrUn | 9870392 | 9871431 | 1040 SAT1_CF | blue | na |
| chrUn | 9871475 | 9872148 | 674 SAT1_CF  | blue | na |
| chrUn | 9872175 | 9872763 | 589 SAT1_CF  | blue | na |
| chrUn | 9872790 | 9873393 | 604 SAT1_CF  | blue | na |
| chrUn | 9873405 | 9874500 | 1096 SAT1_CF | blue | na |
| chrUn | 9874542 | 9875217 | 676 SAT1_CF  | blue | na |
| chrUn | 9875229 | 9875735 | 507 SAT1_CF  | blue | na |
| chrUn | 9875770 | 9876171 | 402 SAT1_CF  | blue | na |
| chrUn | 9876185 | 9876692 | 508 SAT1_CF  | blue | na |

|       |         |         |              |      |    |
|-------|---------|---------|--------------|------|----|
| chrUn | 9876770 | 9878719 | 1950 SAT1_CF | blue | na |
| chrUn | 9878732 | 9879232 | 501 SAT1_CF  | blue | na |
| chrUn | 9879277 | 9881907 | 2631 SAT1_CF | blue | na |
| chrUn | 9881971 | 9882366 | 396 SAT1_CF  | blue | na |
| chrUn | 9882381 | 9882888 | 508 SAT1_CF  | blue | na |
| chrUn | 9882915 | 9883695 | 781 SAT1_CF  | blue | na |
| chrUn | 9883722 | 9883997 | 276 SAT1_CF  | blue | na |
| chrUn | 9884010 | 9884562 | 553 SAT1_CF  | blue | na |
| chrUn | 9884618 | 9884690 | 73 SAT1_CF   | blue | na |
| chrUn | 9884703 | 9885204 | 502 SAT1_CF  | blue | na |
| chrUn | 9885259 | 9886625 | 1367 SAT1_CF | blue | na |
| chrUn | 9886668 | 9887874 | 1207 SAT1_CF | blue | na |
| chrUn | 9887895 | 9888004 | 110 SAT1_CF  | blue | na |
| chrUn | 9888016 | 9888518 | 503 SAT1_CF  | blue | na |
| chrUn | 9888563 | 9888664 | 102 SAT1_CF  | blue | na |
| chrUn | 9888771 | 9889257 | 487 SAT1_CF  | blue | na |
| chrUn | 9889288 | 9890747 | 1460 SAT1_CF | blue | na |
| chrUn | 9890759 | 9891312 | 554 SAT1_CF  | blue | na |
| chrUn | 9891333 | 9891440 | 108 SAT1_CF  | blue | na |
| chrUn | 9891453 | 9891952 | 500 SAT1_CF  | blue | na |
| chrUn | 9892018 | 9892154 | 137 SAT1_CF  | blue | na |
| chrUn | 9892182 | 9893387 | 1206 SAT1_CF | blue | na |
| chrUn | 9893440 | 9893516 | 77 SAT1_CF   | blue | na |
| chrUn | 9893529 | 9894341 | 813 SAT1_CF  | blue | na |
| chrUn | 9894377 | 9895693 | 1317 SAT1_CF | blue | na |
| chrUn | 9895705 | 9896219 | 515 SAT1_CF  | blue | na |
| chrUn | 9896245 | 9896780 | 536 SAT1_CF  | blue | na |
| chrUn | 9896824 | 9897675 | 852 SAT1_CF  | blue | na |
| chrUn | 9898627 | 9899216 | 590 SAT1_CF  | blue | na |
| chrUn | 9899238 | 9899840 | 603 SAT1_CF  | blue | na |
| chrUn | 9899852 | 9900541 | 690 SAT1_CF  | blue | na |
| chrUn | 9900555 | 9901214 | 660 SAT1_CF  | blue | na |
| chrUn | 9901229 | 9902423 | 1195 SAT1_CF | blue | na |
| chrUn | 9902446 | 9902551 | 106 SAT1_CF  | blue | na |
| chrUn | 9902564 | 9903063 | 500 SAT1_CF  | blue | na |
| chrUn | 9903108 | 9904062 | 955 SAT1_CF  | blue | na |
| chrUn | 9904141 | 9904923 | 783 SAT1_CF  | blue | na |
| chrUn | 9904965 | 9905968 | 1004 SAT1_CF | blue | na |
| chrUn | 9905991 | 9906097 | 107 SAT1_CF  | blue | na |
| chrUn | 9906109 | 9906611 | 503 SAT1_CF  | blue | na |
| chrUn | 9906656 | 9906813 | 158 SAT1_CF  | blue | na |
| chrUn | 9906841 | 9907351 | 511 SAT1_CF  | blue | na |



|       |         |         |              |      |    |
|-------|---------|---------|--------------|------|----|
| chrUn | 9907394 | 9908190 | 797 SAT1_CF  | blue | na |
| chrUn | 9908235 | 9908861 | 627 SAT1_CF  | blue | na |
| chrUn | 9908888 | 9909390 | 503 SAT1_CF  | blue | na |
| chrUn | 9909430 | 9911435 | 2006 SAT1_CF | blue | na |
| chrUn | 9911477 | 9912152 | 676 SAT1_CF  | blue | na |
| chrUn | 9912172 | 9912647 | 476 SAT1_CF  | blue | na |
| chrUn | 9912753 | 9914817 | 2065 SAT1_CF | blue | na |
| chrUn | 9914838 | 9914910 | 73 SAT1_CF   | blue | na |
| chrUn | 9914923 | 9915849 | 927 SAT1_CF  | blue | na |
| chrUn | 9915861 | 9916336 | 476 SAT1_CF  | blue | na |
| chrUn | 9916399 | 9917180 | 782 SAT1_CF  | blue | na |
| chrUn | 9917208 | 9917719 | 512 SAT1_CF  | blue | na |
| chrUn | 9917799 | 9918362 | 564 SAT1_CF  | blue | na |
| chrUn | 9918389 | 9919021 | 633 SAT1_CF  | blue | na |
| chrUn | 9919064 | 9919728 | 665 SAT1_CF  | blue | na |
| chrUn | 9919748 | 9920289 | 542 SAT1_CF  | blue | na |
| chrUn | 9920333 | 9921331 | 999 SAT1_CF  | blue | na |
| chrUn | 9921375 | 9922047 | 673 SAT1_CF  | blue | na |
| chrUn | 9922061 | 9922690 | 630 SAT1_CF  | blue | na |
| chrUn | 9922712 | 9923091 | 380 SAT1_CF  | blue | na |
| chrUn | 9923103 | 9923864 | 762 SAT1_CF  | blue | na |
| chrUn | 9923884 | 9924376 | 493 SAT1_CF  | blue | na |
| chrUn | 9924416 | 9924818 | 403 SAT1_CF  | blue | na |
| chrUn | 9924832 | 9925376 | 545 SAT1_CF  | blue | na |
| chrUn | 9925419 | 9926642 | 1224 SAT1_CF | blue | na |
| chrUn | 9926662 | 9927416 | 755 SAT1_CF  | blue | na |
| chrUn | 9927429 | 9927930 | 502 SAT1_CF  | blue | na |
| chrUn | 9928017 | 9929079 | 1063 SAT1_CF | blue | na |
| chrUn | 9929090 | 9929592 | 503 SAT1_CF  | blue | na |
| chrUn | 9929645 | 9931431 | 1787 SAT1_CF | blue | na |
| chrUn | 9931459 | 9931652 | 194 SAT1_CF  | blue | na |
| chrUn | 9931683 | 9932203 | 521 SAT1_CF  | blue | na |
| chrUn | 9932320 | 9933549 | 1230 SAT1_CF | blue | na |
| chrUn | 9933587 | 9934129 | 543 SAT1_CF  | blue | na |
| chrUn | 9934171 | 9934288 | 118 SAT1_CF  | blue | na |
| chrUn | 9934335 | 9934995 | 661 SAT1_CF  | blue | na |
| chrUn | 9935022 | 9935523 | 502 SAT1_CF  | blue | na |
| chrUn | 9935610 | 9935965 | 356 SAT1_CF  | blue | na |
| chrUn | 9935978 | 9937163 | 1186 SAT1_CF | blue | na |
| chrUn | 9937190 | 9937372 | 183 SAT1_CF  | blue | na |
| chrUn | 9937388 | 9937951 | 564 SAT1_CF  | blue | na |
| chrUn | 9938068 | 9939258 | 1191 SAT1_CF | blue | na |

|       |         |         |              |      |    |
|-------|---------|---------|--------------|------|----|
| chrUn | 9939270 | 9939950 | 681 SAT1_CF  | blue | na |
| chrUn | 9939963 | 9940465 | 503 SAT1_CF  | blue | na |
| chrUn | 9940503 | 9940907 | 405 SAT1_CF  | blue | na |
| chrUn | 9940920 | 9942699 | 1780 SAT1_CF | blue | na |
| chrUn | 9942750 | 9943224 | 475 SAT1_CF  | blue | na |
| chrUn | 9943287 | 9944218 | 932 SAT1_CF  | blue | na |
| chrUn | 9944285 | 9944585 | 301 SAT1_CF  | blue | na |
| chrUn | 9944635 | 9945152 | 518 SAT1_CF  | blue | na |
| chrUn | 9945166 | 9945969 | 804 SAT1_CF  | blue | na |
| chrUn | 9945982 | 9946539 | 558 SAT1_CF  | blue | na |
| chrUn | 9946559 | 9946667 | 109 SAT1_CF  | blue | na |
| chrUn | 9946680 | 9947200 | 521 SAT1_CF  | blue | na |
| chrUn | 9947217 | 9947402 | 186 SAT1_CF  | blue | na |
| chrUn | 9947582 | 9947747 | 166 SAT1_CF  | blue | na |
| chrUn | 9947789 | 9951075 | 3287 SAT1_CF | blue | na |
| chrUn | 9951087 | 9951738 | 652 SAT1_CF  | blue | na |
| chrUn | 9951789 | 9952283 | 495 SAT1_CF  | blue | na |
| chrUn | 9952323 | 9953705 | 1383 SAT1_CF | blue | na |
| chrUn | 9953749 | 9954942 | 1194 SAT1_CF | blue | na |
| chrUn | 9954953 | 9955071 | 119 SAT1_CF  | blue | na |
| chrUn | 9955089 | 9955737 | 649 SAT1_CF  | blue | na |
| chrUn | 9955748 | 9956322 | 575 SAT1_CF  | blue | na |
| chrUn | 9956345 | 9956451 | 107 SAT1_CF  | blue | na |
| chrUn | 9956464 | 9957009 | 546 SAT1_CF  | blue | na |
| chrUn | 9957087 | 9958143 | 1057 SAT1_CF | blue | na |
| chrUn | 9958198 | 9958978 | 781 SAT1_CF  | blue | na |
| chrUn | 9959026 | 9959702 | 677 SAT1_CF  | blue | na |
| chrUn | 9959714 | 9960269 | 556 SAT1_CF  | blue | na |
| chrUn | 9960334 | 9961166 | 833 SAT1_CF  | blue | na |
| chrUn | 9961180 | 9962333 | 1154 SAT1_CF | blue | na |
| chrUn | 9962346 | 9963610 | 1265 SAT1_CF | blue | na |
| chrUn | 9963636 | 9963793 | 158 SAT1_CF  | blue | na |
| chrUn | 9963808 | 9964331 | 524 SAT1_CF  | blue | na |
| chrUn | 9964410 | 9965085 | 676 SAT1_CF  | blue | na |
| chrUn | 9965099 | 9965781 | 683 SAT1_CF  | blue | na |
| chrUn | 9965793 | 9966372 | 580 SAT1_CF  | blue | na |
| chrUn | 9966417 | 9967641 | 1225 SAT1_CF | blue | na |
| chrUn | 9967659 | 9968245 | 587 SAT1_CF  | blue | na |
| chrUn | 9968287 | 9968634 | 348 SAT1_CF  | blue | na |
| chrUn | 9968672 | 9969216 | 545 SAT1_CF  | blue | na |
| chrUn | 9969258 | 9970397 | 1140 SAT1_CF | blue | na |
| chrUn | 9970423 | 9972022 | 1600 SAT1_CF | blue | na |

|       |          |          |              |      |    |
|-------|----------|----------|--------------|------|----|
| chrUn | 9972049  | 9973817  | 1769 SAT1_CF | blue | na |
| chrUn | 9973845  | 9975122  | 1278 SAT1_CF | blue | na |
| chrUn | 9975133  | 9975658  | 526 SAT1_CF  | blue | na |
| chrUn | 9975701  | 9976247  | 547 SAT1_CF  | blue | na |
| chrUn | 9976304  | 9976828  | 525 SAT1_CF  | blue | na |
| chrUn | 9976851  | 9977999  | 1149 SAT1_CF | blue | na |
| chrUn | 9978042  | 9979013  | 972 SAT1_CF  | blue | na |
| chrUn | 9979057  | 9980420  | 1364 SAT1_CF | blue | na |
| chrUn | 9980433  | 9980952  | 520 SAT1_CF  | blue | na |
| chrUn | 9980969  | 9981154  | 186 SAT1_CF  | blue | na |
| chrUn | 9981336  | 9981542  | 207 SAT1_CF  | blue | na |
| chrUn | 9981585  | 9982193  | 609 SAT1_CF  | blue | na |
| chrUn | 9982250  | 9983374  | 1125 SAT1_CF | blue | na |
| chrUn | 9983388  | 9984068  | 681 SAT1_CF  | blue | na |
| chrUn | 9984080  | 9984634  | 555 SAT1_CF  | blue | na |
| chrUn | 9984679  | 9984761  | 83 SAT1_CF   | blue | na |
| chrUn | 9984774  | 9985274  | 501 SAT1_CF  | blue | na |
| chrUn | 9985310  | 9985495  | 186 SAT1_CF  | blue | na |
| chrUn | 9985676  | 9986513  | 838 SAT1_CF  | blue | na |
| chrUn | 9986525  | 9987284  | 760 SAT1_CF  | blue | na |
| chrUn | 9987305  | 9987799  | 495 SAT1_CF  | blue | na |
| chrUn | 9987839  | 9988796  | 958 SAT1_CF  | blue | na |
| chrUn | 9988840  | 9989802  | 963 SAT1_CF  | blue | na |
| chrUn | 9989845  | 9991223  | 1379 SAT1_CF | blue | na |
| chrUn | 9991235  | 9991788  | 554 SAT1_CF  | blue | na |
| chrUn | 9991831  | 9992393  | 563 SAT1_CF  | blue | na |
| chrUn | 9992458  | 9993823  | 1366 SAT1_CF | blue | na |
| chrUn | 9993837  | 9994329  | 493 SAT1_CF  | blue | na |
| chrUn | 9994340  | 9996720  | 2381 SAT1_CF | blue | na |
| chrUn | 9996742  | 9997244  | 503 SAT1_CF  | blue | na |
| chrUn | 9997297  | 9997686  | 390 SAT1_CF  | blue | na |
| chrUn | 9997699  | 9997863  | 165 SAT1_CF  | blue | na |
| chrUn | 9997882  | 9999123  | 1242 SAT1_CF | blue | na |
| chrUn | 9999191  | 9999570  | 380 SAT1_CF  | blue | na |
| chrUn | 9999603  | 10000126 | 524 SAT1_CF  | blue | na |
| chrUn | 10000148 | 10001046 | 899 SAT1_CF  | blue | na |
| chrUn | 10001088 | 10001946 | 859 SAT1_CF  | blue | na |
| chrUn | 10001959 | 10002591 | 633 SAT1_CF  | blue | na |
| chrUn | 10002608 | 10002721 | 114 SAT1_CF  | blue | na |
| chrUn | 10002733 | 10003033 | 301 SAT1_CF  | blue | na |
| chrUn | 10003046 | 10003545 | 500 SAT1_CF  | blue | na |
| chrUn | 10003611 | 10003747 | 137 SAT1_CF  | blue | na |

|       |          |          |              |      |    |
|-------|----------|----------|--------------|------|----|
| chrUn | 10003775 | 10004284 | 510 SAT1_CF  | blue | na |
| chrUn | 10004364 | 10005439 | 1076 SAT1_CF | blue | na |
| chrUn | 10005481 | 10006021 | 541 SAT1_CF  | blue | na |
| chrUn | 10006064 | 10007432 | 1369 SAT1_CF | blue | na |
| chrUn | 10007445 | 10007945 | 501 SAT1_CF  | blue | na |
| chrUn | 10007985 | 10008386 | 402 SAT1_CF  | blue | na |
| chrUn | 10008399 | 10008919 | 521 SAT1_CF  | blue | na |
| chrUn | 10008950 | 10009329 | 380 SAT1_CF  | blue | na |
| chrUn | 10009410 | 10010703 | 1294 SAT1_CF | blue | na |
| chrUn | 10010716 | 10011400 | 685 SAT1_CF  | blue | na |
| chrUn | 10011427 | 10011908 | 482 SAT1_CF  | blue | na |
| chrUn | 10011934 | 10013000 | 1067 SAT1_CF | blue | na |
| chrUn | 10013018 | 10013518 | 501 SAT1_CF  | blue | na |
| chrUn | 10013571 | 10013922 | 352 SAT1_CF  | blue | na |
| chrUn | 10013935 | 10014456 | 522 SAT1_CF  | blue | na |
| chrUn | 10014597 | 10015031 | 435 SAT1_CF  | blue | na |
| chrUn | 10015718 | 10016184 | 467 SAT1_CF  | blue | na |
| chrUn | 10016201 | 10016866 | 666 SAT1_CF  | blue | na |
| chrUn | 10017031 | 10017143 | 113 SAT1_CF  | blue | na |
| chrUn | 10017156 | 10017657 | 502 SAT1_CF  | blue | na |
| chrUn | 10017697 | 10018076 | 380 SAT1_CF  | blue | na |
| chrUn | 10018110 | 10018655 | 546 SAT1_CF  | blue | na |
| chrUn | 10018988 | 10019761 | 774 SAT1_CF  | blue | na |
| chrUn | 10019792 | 10020285 | 494 SAT1_CF  | blue | na |
| chrUn | 10020429 | 10022420 | 1992 SAT1_CF | blue | na |
| chrUn | 10022463 | 10023706 | 1244 SAT1_CF | blue | na |
| chrUn | 10023751 | 10024088 | 338 SAT1_CF  | blue | na |
| chrUn | 10024132 | 10025333 | 1202 SAT1_CF | blue | na |
| chrUn | 10025354 | 10025463 | 110 SAT1_CF  | blue | na |
| chrUn | 10025477 | 10026106 | 630 SAT1_CF  | blue | na |
| chrUn | 10026127 | 10026236 | 110 SAT1_CF  | blue | na |
| chrUn | 10026248 | 10026853 | 606 SAT1_CF  | blue | na |
| chrUn | 10026866 | 10027386 | 521 SAT1_CF  | blue | na |
| chrUn | 10027454 | 10028330 | 877 SAT1_CF  | blue | na |
| chrUn | 10028446 | 10028934 | 489 SAT1_CF  | blue | na |
| chrUn | 10028945 | 10030028 | 1084 SAT1_CF | blue | na |
| chrUn | 10030048 | 10030548 | 501 SAT1_CF  | blue | na |
| chrUn | 10030629 | 10030803 | 175 SAT1_CF  | blue | na |
| chrUn | 10030884 | 10032128 | 1245 SAT1_CF | blue | na |
| chrUn | 10032140 | 10032786 | 647 SAT1_CF  | blue | na |
| chrUn | 10032799 | 10033727 | 929 SAT1_CF  | blue | na |
| chrUn | 10033739 | 10034422 | 684 SAT1_CF  | blue | na |

|       |          |          |              |      |    |
|-------|----------|----------|--------------|------|----|
| chrUn | 10034434 | 10035065 | 632 SAT1_CF  | blue | na |
| chrUn | 10035088 | 10035193 | 106 SAT1_CF  | blue | na |
| chrUn | 10035206 | 10036902 | 1697 SAT1_CF | blue | na |
| chrUn | 10036925 | 10037030 | 106 SAT1_CF  | blue | na |
| chrUn | 10037043 | 10037562 | 520 SAT1_CF  | blue | na |
| chrUn | 10037579 | 10037764 | 186 SAT1_CF  | blue | na |
| chrUn | 10037945 | 10038147 | 203 SAT1_CF  | blue | na |
| chrUn | 10038190 | 10038799 | 610 SAT1_CF  | blue | na |
| chrUn | 10038819 | 10039977 | 1159 SAT1_CF | blue | na |
| chrUn | 10039989 | 10041563 | 1575 SAT1_CF | blue | na |
| chrUn | 10041759 | 10042869 | 1111 SAT1_CF | blue | na |
| chrUn | 10042912 | 10043629 | 718 SAT1_CF  | blue | na |
| chrUn | 10043684 | 10044746 | 1063 SAT1_CF | blue | na |
| chrUn | 10044825 | 10045787 | 963 SAT1_CF  | blue | na |
| chrUn | 10045830 | 10046509 | 680 SAT1_CF  | blue | na |
| chrUn | 10046521 | 10047194 | 674 SAT1_CF  | blue | na |
| chrUn | 10047215 | 10047716 | 502 SAT1_CF  | blue | na |
| chrUn | 10047769 | 10048158 | 390 SAT1_CF  | blue | na |
| chrUn | 10048171 | 10050013 | 1843 SAT1_CF | blue | na |
| chrUn | 10050039 | 10051345 | 1307 SAT1_CF | blue | na |
| chrUn | 10051388 | 10052064 | 677 SAT1_CF  | blue | na |
| chrUn | 10052076 | 10052678 | 603 SAT1_CF  | blue | na |
| chrUn | 10052689 | 10053368 | 680 SAT1_CF  | blue | na |
| chrUn | 10053380 | 10054068 | 689 SAT1_CF  | blue | na |
| chrUn | 10054082 | 10054741 | 660 SAT1_CF  | blue | na |
| chrUn | 10054756 | 10055952 | 1197 SAT1_CF | blue | na |
| chrUn | 10055975 | 10056080 | 106 SAT1_CF  | blue | na |
| chrUn | 10056093 | 10056594 | 502 SAT1_CF  | blue | na |
| chrUn | 10056630 | 10056815 | 186 SAT1_CF  | blue | na |
| chrUn | 10056995 | 10057829 | 835 SAT1_CF  | blue | na |
| chrUn | 10057841 | 10058602 | 762 SAT1_CF  | blue | na |
| chrUn | 10058616 | 10059117 | 502 SAT1_CF  | blue | na |
| chrUn | 10059153 | 10061047 | 1895 SAT1_CF | blue | na |
| chrUn | 10061060 | 10061906 | 847 SAT1_CF  | blue | na |
| chrUn | 10061918 | 10062600 | 683 SAT1_CF  | blue | na |
| chrUn | 10062613 | 10063315 | 703 SAT1_CF  | blue | na |
| chrUn | 10063330 | 10063855 | 526 SAT1_CF  | blue | na |
| chrUn | 10063898 | 10064450 | 553 SAT1_CF  | blue | na |
| chrUn | 10064494 | 10065036 | 543 SAT1_CF  | blue | na |
| chrUn | 10065133 | 10066582 | 1450 SAT1_CF | blue | na |
| chrUn | 10066602 | 10067714 | 1113 SAT1_CF | blue | na |
| chrUn | 10067752 | 10070227 | 2476 SAT1_CF | blue | na |

|       |          |          |              |      |    |
|-------|----------|----------|--------------|------|----|
| chrUn | 10070240 | 10071000 | 761 SAT1_CF  | blue | na |
| chrUn | 10071013 | 10071514 | 502 SAT1_CF  | blue | na |
| chrUn | 10071601 | 10072515 | 915 SAT1_CF  | blue | na |
| chrUn | 10072594 | 10074177 | 1584 SAT1_CF | blue | na |
| chrUn | 10074190 | 10074711 | 522 SAT1_CF  | blue | na |
| chrUn | 10074732 | 10075261 | 530 SAT1_CF  | blue | na |
| chrUn | 10075290 | 10076602 | 1313 SAT1_CF | blue | na |
| chrUn | 10076644 | 10077492 | 849 SAT1_CF  | blue | na |
| chrUn | 10077516 | 10078068 | 553 SAT1_CF  | blue | na |
| chrUn | 10078089 | 10078197 | 109 SAT1_CF  | blue | na |
| chrUn | 10078210 | 10078730 | 521 SAT1_CF  | blue | na |
| chrUn | 10078749 | 10079862 | 1114 SAT1_CF | blue | na |
| chrUn | 10079910 | 10080586 | 677 SAT1_CF  | blue | na |
| chrUn | 10080598 | 10081529 | 932 SAT1_CF  | blue | na |
| chrUn | 10081589 | 10082549 | 961 SAT1_CF  | blue | na |
| chrUn | 10082593 | 10083557 | 965 SAT1_CF  | blue | na |
| chrUn | 10083580 | 10084217 | 638 SAT1_CF  | blue | na |
| chrUn | 10084243 | 10084398 | 156 SAT1_CF  | blue | na |
| chrUn | 10084611 | 10085225 | 615 SAT1_CF  | blue | na |
| chrUn | 10085238 | 10085989 | 752 SAT1_CF  | blue | na |
| chrUn | 10086011 | 10086592 | 582 SAT1_CF  | blue | na |
| chrUn | 10086675 | 10087183 | 509 SAT1_CF  | blue | na |
| chrUn | 10087242 | 10088098 | 857 SAT1_CF  | blue | na |
| chrUn | 10088116 | 10090326 | 2211 SAT1_CF | blue | na |
| chrUn | 10090344 | 10090825 | 482 SAT1_CF  | blue | na |
| chrUn | 10090932 | 10091916 | 985 SAT1_CF  | blue | na |
| chrUn | 10091937 | 10092045 | 109 SAT1_CF  | blue | na |
| chrUn | 10092058 | 10092531 | 474 SAT1_CF  | blue | na |
| chrUn | 10092591 | 10092771 | 181 SAT1_CF  | blue | na |
| chrUn | 10092952 | 10094169 | 1218 SAT1_CF | blue | na |
| chrUn | 10094197 | 10096116 | 1920 SAT1_CF | blue | na |
| chrUn | 10096168 | 10096299 | 132 SAT1_CF  | blue | na |
| chrUn | 10096314 | 10097638 | 1325 SAT1_CF | blue | na |
| chrUn | 10097661 | 10098131 | 471 SAT1_CF  | blue | na |
| chrUn | 10098192 | 10098373 | 182 SAT1_CF  | blue | na |
| chrUn | 10098554 | 10098756 | 203 SAT1_CF  | blue | na |
| chrUn | 10098799 | 10099346 | 548 SAT1_CF  | blue | na |
| chrUn | 10099390 | 10101345 | 1956 SAT1_CF | blue | na |
| chrUn | 10101358 | 10101858 | 501 SAT1_CF  | blue | na |
| chrUn | 10101898 | 10102298 | 401 SAT1_CF  | blue | na |
| chrUn | 10102310 | 10102856 | 547 SAT1_CF  | blue | na |
| chrUn | 10102913 | 10103260 | 348 SAT1_CF  | blue | na |

|       |          |          |      |         |      |    |
|-------|----------|----------|------|---------|------|----|
| chrUn | 10103285 | 10104573 | 1289 | SAT1_CF | blue | na |
| chrUn | 10104594 | 10104972 | 379  | SAT1_CF | blue | na |
| chrUn | 10105009 | 10105516 | 508  | SAT1_CF | blue | na |
| chrUn | 10105559 | 10106376 | 818  | SAT1_CF | blue | na |
| chrUn | 10106418 | 10107208 | 791  | SAT1_CF | blue | na |
| chrUn | 10107264 | 10107336 | 73   | SAT1_CF | blue | na |
| chrUn | 10107349 | 10107851 | 503  | SAT1_CF | blue | na |
| chrUn | 10107896 | 10108053 | 158  | SAT1_CF | blue | na |
| chrUn | 10108104 | 10108590 | 487  | SAT1_CF | blue | na |
| chrUn | 10108621 | 10110284 | 1664 | SAT1_CF | blue | na |
| chrUn | 10110305 | 10110412 | 108  | SAT1_CF | blue | na |
| chrUn | 10110425 | 10110924 | 500  | SAT1_CF | blue | na |
| chrUn | 10111011 | 10113681 | 2671 | SAT1_CF | blue | na |
| chrUn | 10113693 | 10114302 | 610  | SAT1_CF | blue | na |
| chrUn | 10114315 | 10114817 | 503  | SAT1_CF | blue | na |
| chrUn | 10114903 | 10115077 | 175  | SAT1_CF | blue | na |
| chrUn | 10115158 | 10116403 | 1246 | SAT1_CF | blue | na |
| chrUn | 10116415 | 10116966 | 552  | SAT1_CF | blue | na |
| chrUn | 10116988 | 10117060 | 73   | SAT1_CF | blue | na |
| chrUn | 10117073 | 10118000 | 928  | SAT1_CF | blue | na |
| chrUn | 10118012 | 10118695 | 684  | SAT1_CF | blue | na |
| chrUn | 10118707 | 10119391 | 685  | SAT1_CF | blue | na |
| chrUn | 10119403 | 10120087 | 685  | SAT1_CF | blue | na |
| chrUn | 10120100 | 10120935 | 836  | SAT1_CF | blue | na |
| chrUn | 10120948 | 10122264 | 1317 | SAT1_CF | blue | na |
| chrUn | 10122276 | 10122790 | 515  | SAT1_CF | blue | na |
| chrUn | 10122805 | 10123349 | 545  | SAT1_CF | blue | na |
| chrUn | 10123394 | 10124120 | 727  | SAT1_CF | blue | na |
| chrUn | 10124163 | 10124839 | 677  | SAT1_CF | blue | na |
| chrUn | 10124851 | 10126144 | 1294 | SAT1_CF | blue | na |
| chrUn | 10126156 | 10126844 | 689  | SAT1_CF | blue | na |
| chrUn | 10126858 | 10128728 | 1871 | SAT1_CF | blue | na |
| chrUn | 10128751 | 10128856 | 106  | SAT1_CF | blue | na |
| chrUn | 10128869 | 10129369 | 501  | SAT1_CF | blue | na |
| chrUn | 10129414 | 10129571 | 158  | SAT1_CF | blue | na |
| chrUn | 10129599 | 10130757 | 1159 | SAT1_CF | blue | na |
| chrUn | 10130769 | 10132729 | 1961 | SAT1_CF | blue | na |
| chrUn | 10132771 | 10134139 | 1369 | SAT1_CF | blue | na |
| chrUn | 10134151 | 10134614 | 464  | SAT1_CF | blue | na |
| chrUn | 10134684 | 10135229 | 546  | SAT1_CF | blue | na |
| chrUn | 10135251 | 10135357 | 107  | SAT1_CF | blue | na |
| chrUn | 10135370 | 10135872 | 503  | SAT1_CF | blue | na |

|       |          |          |              |      |    |
|-------|----------|----------|--------------|------|----|
| chrUn | 10135957 | 10137229 | 1273 SAT1_CF | blue | na |
| chrUn | 10137242 | 10137797 | 556 SAT1_CF  | blue | na |
| chrUn | 10137818 | 10137920 | 103 SAT1_CF  | blue | na |
| chrUn | 10137938 | 10138435 | 498 SAT1_CF  | blue | na |
| chrUn | 10138544 | 10138796 | 253 SAT1_CF  | blue | na |
| chrUn | 10138815 | 10139741 | 927 SAT1_CF  | blue | na |
| chrUn | 10139756 | 10141226 | 1471 SAT1_CF | blue | na |
| chrUn | 10141238 | 10141923 | 686 SAT1_CF  | blue | na |
| chrUn | 10141934 | 10142488 | 555 SAT1_CF  | blue | na |
| chrUn | 10142602 | 10143575 | 974 SAT1_CF  | blue | na |
| chrUn | 10143618 | 10145309 | 1692 SAT1_CF | blue | na |
| chrUn | 10145340 | 10145859 | 520 SAT1_CF  | blue | na |
| chrUn | 10145976 | 10146331 | 356 SAT1_CF  | blue | na |
| chrUn | 10146343 | 10147312 | 970 SAT1_CF  | blue | na |
| chrUn | 10147356 | 10148771 | 1416 SAT1_CF | blue | na |
| chrUn | 10148798 | 10149299 | 502 SAT1_CF  | blue | na |
| chrUn | 10149344 | 10150686 | 1343 SAT1_CF | blue | na |
| chrUn | 10150942 | 10153566 | 2625 SAT1_CF | blue | na |
| chrUn | 10153619 | 10154398 | 780 SAT1_CF  | blue | na |
| chrUn | 10154412 | 10155107 | 696 SAT1_CF  | blue | na |
| chrUn | 10155151 | 10155612 | 462 SAT1_CF  | blue | na |
| chrUn | 10155630 | 10156141 | 512 SAT1_CF  | blue | na |
| chrUn | 10156222 | 10156784 | 563 SAT1_CF  | blue | na |
| chrUn | 10156828 | 10158150 | 1323 SAT1_CF | blue | na |
| chrUn | 10158162 | 10158682 | 521 SAT1_CF  | blue | na |
| chrUn | 10158749 | 10159660 | 912 SAT1_CF  | blue | na |
| chrUn | 10159739 | 10160704 | 966 SAT1_CF  | blue | na |
| chrUn | 10160747 | 10161421 | 675 SAT1_CF  | blue | na |
| chrUn | 10161433 | 10162114 | 682 SAT1_CF  | blue | na |
| chrUn | 10162127 | 10162627 | 501 SAT1_CF  | blue | na |
| chrUn | 10162693 | 10162829 | 137 SAT1_CF  | blue | na |
| chrUn | 10162844 | 10163367 | 524 SAT1_CF  | blue | na |
| chrUn | 10163398 | 10164485 | 1088 SAT1_CF | blue | na |
| chrUn | 10164564 | 10165036 | 473 SAT1_CF  | blue | na |
| chrUn | 10165153 | 10166135 | 983 SAT1_CF  | blue | na |
| chrUn | 10166153 | 10167698 | 1546 SAT1_CF | blue | na |
| chrUn | 10167711 | 10168213 | 503 SAT1_CF  | blue | na |
| chrUn | 10168253 | 10168655 | 403 SAT1_CF  | blue | na |
| chrUn | 10168668 | 10170444 | 1777 SAT1_CF | blue | na |
| chrUn | 10170497 | 10170971 | 475 SAT1_CF  | blue | na |
| chrUn | 10171034 | 10171965 | 932 SAT1_CF  | blue | na |
| chrUn | 10171997 | 10173717 | 1721 SAT1_CF | blue | na |



|       |          |          |              |      |    |
|-------|----------|----------|--------------|------|----|
| chrUn | 10173729 | 10173943 | 215 SAT1_CF  | blue | na |
| chrUn | 10174138 | 10176324 | 2187 SAT1_CF | blue | na |
| chrUn | 10176335 | 10177091 | 757 SAT1_CF  | blue | na |
| chrUn | 10177109 | 10178220 | 1112 SAT1_CF | blue | na |
| chrUn | 10178262 | 10179128 | 867 SAT1_CF  | blue | na |
| chrUn | 10179140 | 10179695 | 556 SAT1_CF  | blue | na |
| chrUn | 10179750 | 10180381 | 632 SAT1_CF  | blue | na |
| chrUn | 10180424 | 10182272 | 1849 SAT1_CF | blue | na |
| chrUn | 10182349 | 10183209 | 861 SAT1_CF  | blue | na |
| chrUn | 10183222 | 10183779 | 558 SAT1_CF  | blue | na |
| chrUn | 10183799 | 10183907 | 109 SAT1_CF  | blue | na |
| chrUn | 10183920 | 10184394 | 475 SAT1_CF  | blue | na |
| chrUn | 10184447 | 10184626 | 180 SAT1_CF  | blue | na |
| chrUn | 10184643 | 10186041 | 1399 SAT1_CF | blue | na |
| chrUn | 10186062 | 10186411 | 350 SAT1_CF  | blue | na |
| chrUn | 10186491 | 10188242 | 1752 SAT1_CF | blue | na |
| chrUn | 10188254 | 10188936 | 683 SAT1_CF  | blue | na |
| chrUn | 10188950 | 10189450 | 501 SAT1_CF  | blue | na |
| chrUn | 10189537 | 10190424 | 888 SAT1_CF  | blue | na |
| chrUn | 10190456 | 10190974 | 519 SAT1_CF  | blue | na |
| chrUn | 10190988 | 10191527 | 540 SAT1_CF  | blue | na |
| chrUn | 10191570 | 10192246 | 677 SAT1_CF  | blue | na |
| chrUn | 10192258 | 10192873 | 616 SAT1_CF  | blue | na |
| chrUn | 10192890 | 10194287 | 1398 SAT1_CF | blue | na |
| chrUn | 10194301 | 10194820 | 520 SAT1_CF  | blue | na |
| chrUn | 10194841 | 10195200 | 360 SAT1_CF  | blue | na |
| chrUn | 10195214 | 10197783 | 2570 SAT1_CF | blue | na |
| chrUn | 10197826 | 10198500 | 675 SAT1_CF  | blue | na |
| chrUn | 10198512 | 10199195 | 684 SAT1_CF  | blue | na |
| chrUn | 10199209 | 10199688 | 480 SAT1_CF  | blue | na |
| chrUn | 10199795 | 10200308 | 514 SAT1_CF  | blue | na |
| chrUn | 10200338 | 10202428 | 2091 SAT1_CF | blue | na |
| chrUn | 10202440 | 10203086 | 647 SAT1_CF  | blue | na |
| chrUn | 10203099 | 10203860 | 762 SAT1_CF  | blue | na |
| chrUn | 10203872 | 10204445 | 574 SAT1_CF  | blue | na |
| chrUn | 10204468 | 10204574 | 107 SAT1_CF  | blue | na |
| chrUn | 10204587 | 10205132 | 546 SAT1_CF  | blue | na |
| chrUn | 10205209 | 10207246 | 2038 SAT1_CF | blue | na |
| chrUn | 10207269 | 10207824 | 556 SAT1_CF  | blue | na |
| chrUn | 10207849 | 10207953 | 105 SAT1_CF  | blue | na |
| chrUn | 10207966 | 10208844 | 879 SAT1_CF  | blue | na |
| chrUn | 10208857 | 10210010 | 1154 SAT1_CF | blue | na |

|       |          |          |              |      |    |
|-------|----------|----------|--------------|------|----|
| chrUn | 10210023 | 10210524 | 502 SAT1_CF  | blue | na |
| chrUn | 10210590 | 10210726 | 137 SAT1_CF  | blue | na |
| chrUn | 10210758 | 10211263 | 506 SAT1_CF  | blue | na |
| chrUn | 10211295 | 10212000 | 706 SAT1_CF  | blue | na |
| chrUn | 10212020 | 10212534 | 515 SAT1_CF  | blue | na |
| chrUn | 10212560 | 10212717 | 158 SAT1_CF  | blue | na |
| chrUn | 10212732 | 10213256 | 525 SAT1_CF  | blue | na |
| chrUn | 10213336 | 10214010 | 675 SAT1_CF  | blue | na |
| chrUn | 10214024 | 10214706 | 683 SAT1_CF  | blue | na |
| chrUn | 10214718 | 10215216 | 499 SAT1_CF  | blue | na |
| chrUn | 10215233 | 10216442 | 1210 SAT1_CF | blue | na |
| chrUn | 10216508 | 10217175 | 668 SAT1_CF  | blue | na |
| chrUn | 10217217 | 10217564 | 348 SAT1_CF  | blue | na |
| chrUn | 10217602 | 10218146 | 545 SAT1_CF  | blue | na |
| chrUn | 10218196 | 10218734 | 539 SAT1_CF  | blue | na |
| chrUn | 10218777 | 10219457 | 681 SAT1_CF  | blue | na |
| chrUn | 10219469 | 10220308 | 840 SAT1_CF  | blue | na |
| chrUn | 10220321 | 10220823 | 503 SAT1_CF  | blue | na |
| chrUn | 10220876 | 10221194 | 319 SAT1_CF  | blue | na |
| chrUn | 10221205 | 10221748 | 544 SAT1_CF  | blue | na |
| chrUn | 10221759 | 10221985 | 227 SAT1_CF  | blue | na |
| chrUn | 10222065 | 10222718 | 654 SAT1_CF  | blue | na |
| chrUn | 10222730 | 10224324 | 1595 SAT1_CF | blue | na |
| chrUn | 10224424 | 10225786 | 1363 SAT1_CF | blue | na |
| chrUn | 10225799 | 10227449 | 1651 SAT1_CF | blue | na |
| chrUn | 10227467 | 10228226 | 760 SAT1_CF  | blue | na |
| chrUn | 10228239 | 10229486 | 1248 SAT1_CF | blue | na |
| chrUn | 10229529 | 10230073 | 545 SAT1_CF  | blue | na |
| chrUn | 10230116 | 10230662 | 547 SAT1_CF  | blue | na |
| chrUn | 10230683 | 10230792 | 110 SAT1_CF  | blue | na |
| chrUn | 10230804 | 10231177 | 374 SAT1_CF  | blue | na |
| chrUn | 10231206 | 10231923 | 718 SAT1_CF  | blue | na |
| chrUn | 10231935 | 10232695 | 761 SAT1_CF  | blue | na |
| chrUn | 10232709 | 10233190 | 482 SAT1_CF  | blue | na |
| chrUn | 10233297 | 10233624 | 328 SAT1_CF  | blue | na |
| chrUn | 10233662 | 10235107 | 1446 SAT1_CF | blue | na |
| chrUn | 10235149 | 10235778 | 630 SAT1_CF  | blue | na |
| chrUn | 10235791 | 10236370 | 580 SAT1_CF  | blue | na |
| chrUn | 10236449 | 10238238 | 1790 SAT1_CF | blue | na |
| chrUn | 10238250 | 10238881 | 632 SAT1_CF  | blue | na |
| chrUn | 10238939 | 10239494 | 556 SAT1_CF  | blue | na |
| chrUn | 10239537 | 10240470 | 934 SAT1_CF  | blue | na |

|       |          |          |              |      |    |
|-------|----------|----------|--------------|------|----|
| chrUn | 10240497 | 10241129 | 633 SAT1_CF  | blue | na |
| chrUn | 10241172 | 10241718 | 547 SAT1_CF  | blue | na |
| chrUn | 10241738 | 10241847 | 110 SAT1_CF  | blue | na |
| chrUn | 10241859 | 10242622 | 764 SAT1_CF  | blue | na |
| chrUn | 10242634 | 10243316 | 683 SAT1_CF  | blue | na |
| chrUn | 10243329 | 10243830 | 502 SAT1_CF  | blue | na |
| chrUn | 10243917 | 10244827 | 911 SAT1_CF  | blue | na |
| chrUn | 10244843 | 10245734 | 892 SAT1_CF  | blue | na |
| chrUn | 10245783 | 10246454 | 672 SAT1_CF  | blue | na |
| chrUn | 10246467 | 10246968 | 502 SAT1_CF  | blue | na |
| chrUn | 10247055 | 10247410 | 356 SAT1_CF  | blue | na |
| chrUn | 10247423 | 10247932 | 510 SAT1_CF  | blue | na |
| chrUn | 10248011 | 10248793 | 783 SAT1_CF  | blue | na |
| chrUn | 10248835 | 10249398 | 564 SAT1_CF  | blue | na |
| chrUn | 10249515 | 10251397 | 1883 SAT1_CF | blue | na |
| chrUn | 10251410 | 10251912 | 503 SAT1_CF  | blue | na |
| chrUn | 10251952 | 10252352 | 401 SAT1_CF  | blue | na |
| chrUn | 10252367 | 10255050 | 2684 SAT1_CF | blue | na |
| chrUn | 10255093 | 10255769 | 677 SAT1_CF  | blue | na |
| chrUn | 10255781 | 10256383 | 603 SAT1_CF  | blue | na |
| chrUn | 10256394 | 10257074 | 681 SAT1_CF  | blue | na |
| chrUn | 10257086 | 10257768 | 683 SAT1_CF  | blue | na |
| chrUn | 10257782 | 10258321 | 540 SAT1_CF  | blue | na |
| chrUn | 10258332 | 10258839 | 508 SAT1_CF  | blue | na |
| chrUn | 10258868 | 10259655 | 788 SAT1_CF  | blue | na |
| chrUn | 10259678 | 10259783 | 106 SAT1_CF  | blue | na |
| chrUn | 10259796 | 10260297 | 502 SAT1_CF  | blue | na |
| chrUn | 10260363 | 10260499 | 137 SAT1_CF  | blue | na |
| chrUn | 10260527 | 10262191 | 1665 SAT1_CF | blue | na |
| chrUn | 10262233 | 10263393 | 1161 SAT1_CF | blue | na |
| chrUn | 10263406 | 10264467 | 1062 SAT1_CF | blue | na |
| chrUn | 10264488 | 10264597 | 110 SAT1_CF  | blue | na |
| chrUn | 10264609 | 10265109 | 501 SAT1_CF  | blue | na |
| chrUn | 10265196 | 10266529 | 1334 SAT1_CF | blue | na |
| chrUn | 10266573 | 10267901 | 1329 SAT1_CF | blue | na |
| chrUn | 10267919 | 10268473 | 555 SAT1_CF  | blue | na |
| chrUn | 10268495 | 10268602 | 108 SAT1_CF  | blue | na |
| chrUn | 10268615 | 10269134 | 520 SAT1_CF  | blue | na |
| chrUn | 10269151 | 10270031 | 881 SAT1_CF  | blue | na |
| chrUn | 10270044 | 10270664 | 621 SAT1_CF  | blue | na |
| chrUn | 10270687 | 10270792 | 106 SAT1_CF  | blue | na |
| chrUn | 10270805 | 10271306 | 502 SAT1_CF  | blue | na |

|       |          |          |              |      |    |
|-------|----------|----------|--------------|------|----|
| chrUn | 10271342 | 10271527 | 186 SAT1_CF  | blue | na |
| chrUn | 10271710 | 10271875 | 166 SAT1_CF  | blue | na |
| chrUn | 10271956 | 10273584 | 1629 SAT1_CF | blue | na |
| chrUn | 10273627 | 10274302 | 676 SAT1_CF  | blue | na |
| chrUn | 10274316 | 10275076 | 761 SAT1_CF  | blue | na |
| chrUn | 10275088 | 10275770 | 683 SAT1_CF  | blue | na |
| chrUn | 10275783 | 10277210 | 1428 SAT1_CF | blue | na |
| chrUn | 10277233 | 10278563 | 1331 SAT1_CF | blue | na |
| chrUn | 10278575 | 10279260 | 686 SAT1_CF  | blue | na |
| chrUn | 10279271 | 10279826 | 556 SAT1_CF  | blue | na |
| chrUn | 10279940 | 10280913 | 974 SAT1_CF  | blue | na |
| chrUn | 10280956 | 10282648 | 1693 SAT1_CF | blue | na |
| chrUn | 10282679 | 10283197 | 519 SAT1_CF  | blue | na |
| chrUn | 10283314 | 10283669 | 356 SAT1_CF  | blue | na |
| chrUn | 10283682 | 10285309 | 1628 SAT1_CF | blue | na |
| chrUn | 10285389 | 10286060 | 672 SAT1_CF  | blue | na |
| chrUn | 10286071 | 10286611 | 541 SAT1_CF  | blue | na |
| chrUn | 10286655 | 10286970 | 316 SAT1_CF  | blue | na |
| chrUn | 10287014 | 10288219 | 1206 SAT1_CF | blue | na |
| chrUn | 10288276 | 10288795 | 520 SAT1_CF  | blue | na |
| chrUn | 10288890 | 10289026 | 137 SAT1_CF  | blue | na |
| chrUn | 10289054 | 10289565 | 512 SAT1_CF  | blue | na |
| chrUn | 10289593 | 10290098 | 506 SAT1_CF  | blue | na |
| chrUn | 10290140 | 10290756 | 617 SAT1_CF  | blue | na |
| chrUn | 10290769 | 10292345 | 1577 SAT1_CF | blue | na |
| chrUn | 10292369 | 10292475 | 107 SAT1_CF  | blue | na |
| chrUn | 10292487 | 10293012 | 526 SAT1_CF  | blue | na |
| chrUn | 10293064 | 10293749 | 686 SAT1_CF  | blue | na |
| chrUn | 10293782 | 10294827 | 1046 SAT1_CF | blue | na |
| chrUn | 10294839 | 10296035 | 1197 SAT1_CF | blue | na |
| chrUn | 10296048 | 10296256 | 209 SAT1_CF  | blue | na |
| chrUn | 10296439 | 10297275 | 837 SAT1_CF  | blue | na |
| chrUn | 10297287 | 10298048 | 762 SAT1_CF  | blue | na |
| chrUn | 10298062 | 10298563 | 502 SAT1_CF  | blue | na |
| chrUn | 10298616 | 10299943 | 1328 SAT1_CF | blue | na |
| chrUn | 10299986 | 10302093 | 2108 SAT1_CF | blue | na |
| chrUn | 10302113 | 10302704 | 592 SAT1_CF  | blue | na |
| chrUn | 10302722 | 10305193 | 2472 SAT1_CF | blue | na |
| chrUn | 10305236 | 10307762 | 2527 SAT1_CF | blue | na |
| chrUn | 10307780 | 10308282 | 503 SAT1_CF  | blue | na |
| chrUn | 10308322 | 10309463 | 1142 SAT1_CF | blue | na |
| chrUn | 10309560 | 10310433 | 874 SAT1_CF  | blue | na |

|       |          |          |              |      |    |
|-------|----------|----------|--------------|------|----|
| chrUn | 10310477 | 10311002 | 526 SAT1_CF  | blue | na |
| chrUn | 10311033 | 10311805 | 773 SAT1_CF  | blue | na |
| chrUn | 10311817 | 10312490 | 674 SAT1_CF  | blue | na |
| chrUn | 10312502 | 10313185 | 684 SAT1_CF  | blue | na |
| chrUn | 10313198 | 10313698 | 501 SAT1_CF  | blue | na |
| chrUn | 10313740 | 10314660 | 921 SAT1_CF  | blue | na |
| chrUn | 10314721 | 10314980 | 260 SAT1_CF  | blue | na |
| chrUn | 10315093 | 10315295 | 203 SAT1_CF  | blue | na |
| chrUn | 10315336 | 10317737 | 2402 SAT1_CF | blue | na |
| chrUn | 10317814 | 10319329 | 1516 SAT1_CF | blue | na |
| chrUn | 10319342 | 10319842 | 501 SAT1_CF  | blue | na |
| chrUn | 10319908 | 10320044 | 137 SAT1_CF  | blue | na |
| chrUn | 10320059 | 10320806 | 748 SAT1_CF  | blue | na |
| chrUn | 10320867 | 10321414 | 548 SAT1_CF  | blue | na |
| chrUn | 10321435 | 10322091 | 657 SAT1_CF  | blue | na |
| chrUn | 10322104 | 10322605 | 502 SAT1_CF  | blue | na |
| chrUn | 10322645 | 10323047 | 403 SAT1_CF  | blue | na |
| chrUn | 10323058 | 10323566 | 509 SAT1_CF  | blue | na |
| chrUn | 10323597 | 10324557 | 961 SAT1_CF  | blue | na |
| chrUn | 10324569 | 10325279 | 711 SAT1_CF  | blue | na |
| chrUn | 10325293 | 10325409 | 117 SAT1_CF  | blue | na |
| chrUn | 10325421 | 10325941 | 521 SAT1_CF  | blue | na |
| chrUn | 10326009 | 10327818 | 1810 SAT1_CF | blue | na |
| chrUn | 10327860 | 10328718 | 859 SAT1_CF  | blue | na |
| chrUn | 10328730 | 10329339 | 610 SAT1_CF  | blue | na |
| chrUn | 10329352 | 10330055 | 704 SAT1_CF  | blue | na |
| chrUn | 10330070 | 10330594 | 525 SAT1_CF  | blue | na |
| chrUn | 10330673 | 10332155 | 1483 SAT1_CF | blue | na |
| chrUn | 10332167 | 10332669 | 503 SAT1_CF  | blue | na |
| chrUn | 10332687 | 10333410 | 724 SAT1_CF  | blue | na |
| chrUn | 10333453 | 10334014 | 562 SAT1_CF  | blue | na |
| chrUn | 10334042 | 10334670 | 629 SAT1_CF  | blue | na |
| chrUn | 10334715 | 10335393 | 679 SAT1_CF  | blue | na |
| chrUn | 10335405 | 10335958 | 554 SAT1_CF  | blue | na |
| chrUn | 10335980 | 10336087 | 108 SAT1_CF  | blue | na |
| chrUn | 10336100 | 10336599 | 500 SAT1_CF  | blue | na |
| chrUn | 10336635 | 10337647 | 1013 SAT1_CF | blue | na |
| chrUn | 10337714 | 10339414 | 1701 SAT1_CF | blue | na |
| chrUn | 10339436 | 10339957 | 522 SAT1_CF  | blue | na |
| chrUn | 10339983 | 10342017 | 2035 SAT1_CF | blue | na |
| chrUn | 10342060 | 10342724 | 665 SAT1_CF  | blue | na |
| chrUn | 10342747 | 10343429 | 683 SAT1_CF  | blue | na |

|       |          |          |              |      |    |
|-------|----------|----------|--------------|------|----|
| chrUn | 10343449 | 10343943 | 495 SAT1_CF  | blue | na |
| chrUn | 10343988 | 10344129 | 142 SAT1_CF  | blue | na |
| chrUn | 10345130 | 10345616 | 487 SAT1_CF  | blue | na |
| chrUn | 10345628 | 10348808 | 3181 SAT1_CF | blue | na |
| chrUn | 10348850 | 10350192 | 1343 SAT1_CF | blue | na |
| chrUn | 10350212 | 10350706 | 495 SAT1_CF  | blue | na |
| chrUn | 10350746 | 10351319 | 574 SAT1_CF  | blue | na |
| chrUn | 10352732 | 10354124 | 1393 SAT1_CF | blue | na |
| chrUn | 10354136 | 10355132 | 997 SAT1_CF  | blue | na |
| chrUn | 10355152 | 10355240 | 89 SAT1_CF   | blue | na |
| chrUn | 10355272 | 10359102 | 3831 SAT1_CF | blue | na |
| chrUn | 10359114 | 10359797 | 684 SAT1_CF  | blue | na |
| chrUn | 10359810 | 10360295 | 486 SAT1_CF  | blue | na |
| chrUn | 10360363 | 10361470 | 1108 SAT1_CF | blue | na |
| chrUn | 10361564 | 10363079 | 1516 SAT1_CF | blue | na |
| chrUn | 10363093 | 10363561 | 469 SAT1_CF  | blue | na |
| chrUn | 10363582 | 10363691 | 110 SAT1_CF  | blue | na |
| chrUn | 10363703 | 10364386 | 684 SAT1_CF  | blue | na |
| chrUn | 10364398 | 10365525 | 1128 SAT1_CF | blue | na |
| chrUn | 10365604 | 10366326 | 723 SAT1_CF  | blue | na |
| chrUn | 10366373 | 10367561 | 1189 SAT1_CF | blue | na |
| chrUn | 10367627 | 10367763 | 137 SAT1_CF  | blue | na |
| chrUn | 10367829 | 10368350 | 522 SAT1_CF  | blue | na |
| chrUn | 10368364 | 10370505 | 2142 SAT1_CF | blue | na |
| chrUn | 10370518 | 10371020 | 503 SAT1_CF  | blue | na |
| chrUn | 10371063 | 10373098 | 2036 SAT1_CF | blue | na |
| chrUn | 10373142 | 10374554 | 1413 SAT1_CF | blue | na |
| chrUn | 10374597 | 10375146 | 550 SAT1_CF  | blue | na |
| chrUn | 10375225 | 10376346 | 1122 SAT1_CF | blue | na |
| chrUn | 10376359 | 10377110 | 752 SAT1_CF  | blue | na |
| chrUn | 10377132 | 10377633 | 502 SAT1_CF  | blue | na |
| chrUn | 10377673 | 10380550 | 2878 SAT1_CF | blue | na |
| chrUn | 10380809 | 10382140 | 1332 SAT1_CF | blue | na |
| chrUn | 10382173 | 10382838 | 666 SAT1_CF  | blue | na |
| chrUn | 10382851 | 10383350 | 500 SAT1_CF  | blue | na |
| chrUn | 10383365 | 10383906 | 542 SAT1_CF  | blue | na |
| chrUn | 10384043 | 10384348 | 306 SAT1_CF  | blue | na |
| chrUn | 10384391 | 10387162 | 2772 SAT1_CF | blue | na |
| chrUn | 10387175 | 10387676 | 502 SAT1_CF  | blue | na |
| chrUn | 10387742 | 10387878 | 137 SAT1_CF  | blue | na |
| chrUn | 10387906 | 10388453 | 548 SAT1_CF  | blue | na |
| chrUn | 10388537 | 10389096 | 560 SAT1_CF  | blue | na |

|       |          |          |              |      |    |
|-------|----------|----------|--------------|------|----|
| chrUn | 10389121 | 10389754 | 634 SAT1_CF  | blue | na |
| chrUn | 10389797 | 10390984 | 1188 SAT1_CF | blue | na |
| chrUn | 10391024 | 10391725 | 702 SAT1_CF  | blue | na |
| chrUn | 10391768 | 10392844 | 1077 SAT1_CF | blue | na |
| chrUn | 10392887 | 10393747 | 861 SAT1_CF  | blue | na |
| chrUn | 10393759 | 10394504 | 746 SAT1_CF  | blue | na |
| chrUn | 10394531 | 10395033 | 503 SAT1_CF  | blue | na |
| chrUn | 10395073 | 10396893 | 1821 SAT1_CF | blue | na |
| chrUn | 10396923 | 10396965 | 43 SAT1_CF   | blue | na |
| chrUn | 10396978 | 10397827 | 850 SAT1_CF  | blue | na |
| chrUn | 10397839 | 10398501 | 663 SAT1_CF  | blue | na |
| chrUn | 10398543 | 10399769 | 1227 SAT1_CF | blue | na |
| chrUn | 10399781 | 10400383 | 603 SAT1_CF  | blue | na |
| chrUn | 10400394 | 10401073 | 680 SAT1_CF  | blue | na |
| chrUn | 10401085 | 10401767 | 683 SAT1_CF  | blue | na |
| chrUn | 10401781 | 10402321 | 541 SAT1_CF  | blue | na |
| chrUn | 10402332 | 10402840 | 509 SAT1_CF  | blue | na |
| chrUn | 10402871 | 10405062 | 2192 SAT1_CF | blue | na |
| chrUn | 10405074 | 10405721 | 648 SAT1_CF  | blue | na |
| chrUn | 10405776 | 10406269 | 494 SAT1_CF  | blue | na |
| chrUn | 10406309 | 10406957 | 649 SAT1_CF  | blue | na |
| chrUn | 10406978 | 10409529 | 2552 SAT1_CF | blue | na |
| chrUn | 10409548 | 10409862 | 315 SAT1_CF  | blue | na |
| chrUn | 10409942 | 10410506 | 565 SAT1_CF  | blue | na |
| chrUn | 10410549 | 10411191 | 643 SAT1_CF  | blue | na |
| chrUn | 10411209 | 10411885 | 677 SAT1_CF  | blue | na |
| chrUn | 10411897 | 10412659 | 763 SAT1_CF  | blue | na |
| chrUn | 10412679 | 10413809 | 1131 SAT1_CF | blue | na |
| chrUn | 10413856 | 10413992 | 137 SAT1_CF  | blue | na |
| chrUn | 10414020 | 10414531 | 512 SAT1_CF  | blue | na |
| chrUn | 10414574 | 10416675 | 2102 SAT1_CF | blue | na |
| chrUn | 10416688 | 10417189 | 502 SAT1_CF  | blue | na |
| chrUn | 10417238 | 10419193 | 1956 SAT1_CF | blue | na |
| chrUn | 10419236 | 10419791 | 556 SAT1_CF  | blue | na |
| chrUn | 10419808 | 10420378 | 571 SAT1_CF  | blue | na |
| chrUn | 10420443 | 10420600 | 158 SAT1_CF  | blue | na |
| chrUn | 10420615 | 10421138 | 524 SAT1_CF  | blue | na |
| chrUn | 10421168 | 10421433 | 266 SAT1_CF  | blue | na |
| chrUn | 10421513 | 10423199 | 1687 SAT1_CF | blue | na |
| chrUn | 10423223 | 10423905 | 683 SAT1_CF  | blue | na |
| chrUn | 10423918 | 10424438 | 521 SAT1_CF  | blue | na |
| chrUn | 10424457 | 10424920 | 464 SAT1_CF  | blue | na |

|       |          |          |              |      |    |
|-------|----------|----------|--------------|------|----|
| chrUn | 10424964 | 10426167 | 1204 SAT1_CF | blue | na |
| chrUn | 10426187 | 10426296 | 110 SAT1_CF  | blue | na |
| chrUn | 10426308 | 10426992 | 685 SAT1_CF  | blue | na |
| chrUn | 10427006 | 10427525 | 520 SAT1_CF  | blue | na |
| chrUn | 10427544 | 10428029 | 486 SAT1_CF  | blue | na |
| chrUn | 10428044 | 10428821 | 778 SAT1_CF  | blue | na |
| chrUn | 10428833 | 10430509 | 1677 SAT1_CF | blue | na |
| chrUn | 10430541 | 10430581 | 41 SAT1_CF   | blue | na |
| chrUn | 10430594 | 10430761 | 168 SAT1_CF  | blue | na |
| chrUn | 10430773 | 10431445 | 673 SAT1_CF  | blue | na |
| chrUn | 10431458 | 10431939 | 482 SAT1_CF  | blue | na |
| chrUn | 10431965 | 10432827 | 863 SAT1_CF  | blue | na |
| chrUn | 10432867 | 10433801 | 935 SAT1_CF  | blue | na |
| chrUn | 10433868 | 10434825 | 958 SAT1_CF  | blue | na |
| chrUn | 10434874 | 10435548 | 675 SAT1_CF  | blue | na |
| chrUn | 10435560 | 10436490 | 931 SAT1_CF  | blue | na |
| chrUn | 10436550 | 10437509 | 960 SAT1_CF  | blue | na |
| chrUn | 10437553 | 10438628 | 1076 SAT1_CF | blue | na |
| chrUn | 10438672 | 10439346 | 675 SAT1_CF  | blue | na |
| chrUn | 10439373 | 10439961 | 589 SAT1_CF  | blue | na |
| chrUn | 10439988 | 10440588 | 601 SAT1_CF  | blue | na |
| chrUn | 10440600 | 10441695 | 1096 SAT1_CF | blue | na |
| chrUn | 10441737 | 10442412 | 676 SAT1_CF  | blue | na |
| chrUn | 10442424 | 10442925 | 502 SAT1_CF  | blue | na |
| chrUn | 10442937 | 10443146 | 210 SAT1_CF  | blue | na |
| chrUn | 10443328 | 10443648 | 321 SAT1_CF  | blue | na |
| chrUn | 10443919 | 10444757 | 839 SAT1_CF  | blue | na |
| chrUn | 10444779 | 10445429 | 651 SAT1_CF  | blue | na |
| chrUn | 10445443 | 10445951 | 509 SAT1_CF  | blue | na |
| chrUn | 10446029 | 10446335 | 307 SAT1_CF  | blue | na |
| chrUn | 10446378 | 10447709 | 1332 SAT1_CF | blue | na |
| chrUn | 10447721 | 10448202 | 482 SAT1_CF  | blue | na |
| chrUn | 10448226 | 10448332 | 107 SAT1_CF  | blue | na |
| chrUn | 10448345 | 10449968 | 1624 SAT1_CF | blue | na |
| chrUn | 10449980 | 10450741 | 762 SAT1_CF  | blue | na |
| chrUn | 10450753 | 10451307 | 555 SAT1_CF  | blue | na |
| chrUn | 10451328 | 10451433 | 106 SAT1_CF  | blue | na |
| chrUn | 10451447 | 10452433 | 987 SAT1_CF  | blue | na |
| chrUn | 10452517 | 10453077 | 561 SAT1_CF  | blue | na |
| chrUn | 10453142 | 10453772 | 631 SAT1_CF  | blue | na |
| chrUn | 10453815 | 10454489 | 675 SAT1_CF  | blue | na |
| chrUn | 10454509 | 10455004 | 496 SAT1_CF  | blue | na |



|       |          |          |              |      |    |
|-------|----------|----------|--------------|------|----|
| chrUn | 10455070 | 10455206 | 137 SAT1_CF  | blue | na |
| chrUn | 10455221 | 10455744 | 524 SAT1_CF  | blue | na |
| chrUn | 10455774 | 10457013 | 1240 SAT1_CF | blue | na |
| chrUn | 10457064 | 10457782 | 719 SAT1_CF  | blue | na |
| chrUn | 10463913 | 10464879 | 967 SAT1_CF  | blue | na |
| chrUn | 10464924 | 10465081 | 158 SAT1_CF  | blue | na |
| chrUn | 10465109 | 10465656 | 548 SAT1_CF  | blue | na |
| chrUn | 10465752 | 10466405 | 654 SAT1_CF  | blue | na |
| chrUn | 10466417 | 10468095 | 1679 SAT1_CF | blue | na |
| chrUn | 10468156 | 10469208 | 1053 SAT1_CF | blue | na |
| chrUn | 10469231 | 10470113 | 883 SAT1_CF  | blue | na |
| chrUn | 10470125 | 10470807 | 683 SAT1_CF  | blue | na |
| chrUn | 10470820 | 10471320 | 501 SAT1_CF  | blue | na |
| chrUn | 10471360 | 10471739 | 380 SAT1_CF  | blue | na |
| chrUn | 10471773 | 10472294 | 522 SAT1_CF  | blue | na |
| chrUn | 10472308 | 10473379 | 1072 SAT1_CF | blue | na |
| chrUn | 10473410 | 10473930 | 521 SAT1_CF  | blue | na |
| chrUn | 10474046 | 10474401 | 356 SAT1_CF  | blue | na |
| chrUn | 10474414 | 10476039 | 1626 SAT1_CF | blue | na |
| chrUn | 10476124 | 10476791 | 668 SAT1_CF  | blue | na |
| chrUn | 10476803 | 10477361 | 559 SAT1_CF  | blue | na |
| chrUn | 10477383 | 10477489 | 107 SAT1_CF  | blue | na |
| chrUn | 10477502 | 10478004 | 503 SAT1_CF  | blue | na |
| chrUn | 10478070 | 10478206 | 137 SAT1_CF  | blue | na |
| chrUn | 10478221 | 10479493 | 1273 SAT1_CF | blue | na |
| chrUn | 10479516 | 10479621 | 106 SAT1_CF  | blue | na |
| chrUn | 10479634 | 10479947 | 314 SAT1_CF  | blue | na |
| chrUn | 10604574 | 10605193 | 620 SAT1_CF  | blue | na |
| chrUn | 10605207 | 10605600 | 394 SAT1_CF  | blue | na |
| chrUn | 10605644 | 10607185 | 1542 SAT1_CF | blue | na |
| chrUn | 10607197 | 10607755 | 559 SAT1_CF  | blue | na |
| chrUn | 10607820 | 10608366 | 547 SAT1_CF  | blue | na |
| chrUn | 10608388 | 10609374 | 987 SAT1_CF  | blue | na |
| chrUn | 10609417 | 10610079 | 663 SAT1_CF  | blue | na |
| chrUn | 10610092 | 10610773 | 682 SAT1_CF  | blue | na |
| chrUn | 10610786 | 10611306 | 521 SAT1_CF  | blue | na |
| chrUn | 10611327 | 10613588 | 2262 SAT1_CF | blue | na |
| chrUn | 10613631 | 10614178 | 548 SAT1_CF  | blue | na |
| chrUn | 10614193 | 10614306 | 114 SAT1_CF  | blue | na |
| chrUn | 10614318 | 10615297 | 980 SAT1_CF  | blue | na |
| chrUn | 10615340 | 10617682 | 2343 SAT1_CF | blue | na |
| chrUn | 10617694 | 10618228 | 535 SAT1_CF  | blue | na |

|       |          |          |              |      |    |
|-------|----------|----------|--------------|------|----|
| chrUn | 10618242 | 10618759 | 518 SAT1_CF  | blue | na |
| chrUn | 10618776 | 10618960 | 185 SAT1_CF  | blue | na |
| chrUn | 10619137 | 10621014 | 1878 SAT1_CF | blue | na |
| chrUn | 10621058 | 10621604 | 547 SAT1_CF  | blue | na |
| chrUn | 10621626 | 10622375 | 750 SAT1_CF  | blue | na |
| chrUn | 10622396 | 10622504 | 109 SAT1_CF  | blue | na |
| chrUn | 10622517 | 10622999 | 483 SAT1_CF  | blue | na |
| chrUn | 10623106 | 10624078 | 973 SAT1_CF  | blue | na |
| chrUn | 10624133 | 10625096 | 964 SAT1_CF  | blue | na |
| chrUn | 10625139 | 10625787 | 649 SAT1_CF  | blue | na |
| chrUn | 10625798 | 10626493 | 696 SAT1_CF  | blue | na |
| chrUn | 10626572 | 10627248 | 677 SAT1_CF  | blue | na |
| chrUn | 10627262 | 10627944 | 683 SAT1_CF  | blue | na |
| chrUn | 10627956 | 10628866 | 911 SAT1_CF  | blue | na |
| chrUn | 10628909 | 10629679 | 771 SAT1_CF  | blue | na |
| chrUn | 10629748 | 10629816 | 69 SAT1_CF   | blue | na |
| chrUn | 10629827 | 10630412 | 586 SAT1_CF  | blue | na |
| chrUn | 10630454 | 10631565 | 1112 SAT1_CF | blue | na |
| chrUn | 10631610 | 10632287 | 678 SAT1_CF  | blue | na |
| chrUn | 10632299 | 10632982 | 684 SAT1_CF  | blue | na |
| chrUn | 10632995 | 10633495 | 501 SAT1_CF  | blue | na |
| chrUn | 10633533 | 10633936 | 404 SAT1_CF  | blue | na |
| chrUn | 10633947 | 10635355 | 1409 SAT1_CF | blue | na |
| chrUn | 10635397 | 10636181 | 785 SAT1_CF  | blue | na |
| chrUn | 10636212 | 10637670 | 1459 SAT1_CF | blue | na |
| chrUn | 10637682 | 10638366 | 685 SAT1_CF  | blue | na |
| chrUn | 10638378 | 10639061 | 684 SAT1_CF  | blue | na |
| chrUn | 10639074 | 10639574 | 501 SAT1_CF  | blue | na |
| chrUn | 10639629 | 10640464 | 836 SAT1_CF  | blue | na |
| chrUn | 10640507 | 10642007 | 1501 SAT1_CF | blue | na |
| chrUn | 10642057 | 10642554 | 498 SAT1_CF  | blue | na |
| chrUn | 10642595 | 10644464 | 1870 SAT1_CF | blue | na |
| chrUn | 10644476 | 10645114 | 639 SAT1_CF  | blue | na |
| chrUn | 10645143 | 10645243 | 101 SAT1_CF  | blue | na |
| chrUn | 10645256 | 10645758 | 503 SAT1_CF  | blue | na |
| chrUn | 10645798 | 10646757 | 960 SAT1_CF  | blue | na |
| chrUn | 10646801 | 10647797 | 997 SAT1_CF  | blue | na |
| chrUn | 10647840 | 10648512 | 673 SAT1_CF  | blue | na |
| chrUn | 10648525 | 10649088 | 564 SAT1_CF  | blue | na |
| chrUn | 10649127 | 10649845 | 719 SAT1_CF  | blue | na |
| chrUn | 10649888 | 10650554 | 667 SAT1_CF  | blue | na |
| chrUn | 10650566 | 10651041 | 476 SAT1_CF  | blue | na |

|       |          |          |              |      |    |
|-------|----------|----------|--------------|------|----|
| chrUn | 10651111 | 10651772 | 662 SAT1_CF  | blue | na |
| chrUn | 10651795 | 10652338 | 544 SAT1_CF  | blue | na |
| chrUn | 10652366 | 10653494 | 1129 SAT1_CF | blue | na |
| chrUn | 10653544 | 10654394 | 851 SAT1_CF  | blue | na |
| chrUn | 10654407 | 10655778 | 1372 SAT1_CF | blue | na |
| chrUn | 10655865 | 10656778 | 914 SAT1_CF  | blue | na |
| chrUn | 10656857 | 10657814 | 958 SAT1_CF  | blue | na |
| chrUn | 10657862 | 10658537 | 676 SAT1_CF  | blue | na |
| chrUn | 10658549 | 10659479 | 931 SAT1_CF  | blue | na |
| chrUn | 10659544 | 10659701 | 158 SAT1_CF  | blue | na |
| chrUn | 10659729 | 10660240 | 512 SAT1_CF  | blue | na |
| chrUn | 10660320 | 10661618 | 1299 SAT1_CF | blue | na |
| chrUn | 10661662 | 10662349 | 688 SAT1_CF  | blue | na |
| chrUn | 10662363 | 10662953 | 591 SAT1_CF  | blue | na |
| chrUn | 10662980 | 10663454 | 475 SAT1_CF  | blue | na |
| chrUn | 10663511 | 10666301 | 2791 SAT1_CF | blue | na |
| chrUn | 10666356 | 10668035 | 1680 SAT1_CF | blue | na |
| chrUn | 10668047 | 10668597 | 551 SAT1_CF  | blue | na |
| chrUn | 10668609 | 10668724 | 116 SAT1_CF  | blue | na |
| chrUn | 10668737 | 10669258 | 522 SAT1_CF  | blue | na |
| chrUn | 10669292 | 10669679 | 388 SAT1_CF  | blue | na |
| chrUn | 10669694 | 10670200 | 507 SAT1_CF  | blue | na |
| chrUn | 10670234 | 10671107 | 874 SAT1_CF  | blue | na |
| chrUn | 10671130 | 10672770 | 1641 SAT1_CF | blue | na |
| chrUn | 10672797 | 10673277 | 481 SAT1_CF  | blue | na |
| chrUn | 10673303 | 10674368 | 1066 SAT1_CF | blue | na |
| chrUn | 10674386 | 10675217 | 832 SAT1_CF  | blue | na |
| chrUn | 10675299 | 10677453 | 2155 SAT1_CF | blue | na |
| chrUn | 10677470 | 10678348 | 879 SAT1_CF  | blue | na |
| chrUn | 10678408 | 10679081 | 674 SAT1_CF  | blue | na |
| chrUn | 10679093 | 10679763 | 671 SAT1_CF  | blue | na |
| chrUn | 10679789 | 10680290 | 502 SAT1_CF  | blue | na |
| chrUn | 10680376 | 10680893 | 518 SAT1_CF  | blue | na |
| chrUn | 10682298 | 10682892 | 595 SAT1_CF  | blue | na |
| chrUn | 10682941 | 10683960 | 1020 SAT1_CF | blue | na |
| chrUn | 10683982 | 10684482 | 501 SAT1_CF  | blue | na |
| chrUn | 10684525 | 10684921 | 397 SAT1_CF  | blue | na |
| chrUn | 10684932 | 10686559 | 1628 SAT1_CF | blue | na |
| chrUn | 10686602 | 10687274 | 673 SAT1_CF  | blue | na |
| chrUn | 10687288 | 10687789 | 502 SAT1_CF  | blue | na |
| chrUn | 10687876 | 10688812 | 937 SAT1_CF  | blue | na |
| chrUn | 10688891 | 10689642 | 752 SAT1_CF  | blue | na |

|       |          |          |              |        |    |
|-------|----------|----------|--------------|--------|----|
| chrUn | 10689677 | 10690349 | 673 SAT1_CF  | blue   | na |
| chrUn | 10690361 | 10691292 | 932 SAT1_CF  | blue   | na |
| chrUn | 10691357 | 10691514 | 158 SAT1_CF  | blue   | na |
| chrUn | 10691534 | 10691613 | 80 SAT1_CF   | blue   | na |
| chrUn | 10692215 | 10692501 | 287 CarSat1  | red    | na |
| chrUn | 10692653 | 10693372 | 720 CarSat1  | red    | na |
| chrUn | 10693367 | 10694496 | 1130 SAT1_CF | blue   | na |
| chrUn | 10694536 | 10697262 | 2727 SAT1_CF | blue   | na |
| chrUn | 10697273 | 10697665 | 393 SAT1_CF  | blue   | na |
| chrUn | 10697667 | 10698107 | 441 CarSat1  | red    | na |
| chrUn | 10698125 | 10699643 | 1519 CarSat1 | red    | na |
| chrUn | 10699660 | 10700172 | 513 CarSat1  | red    | na |
| chrUn | 10700353 | 10701447 | 1095 CarSat1 | red    | na |
| chrUn | 10701469 | 10702172 | 704 CarSat1  | red    | na |
| chrUn | 10728870 | 10730051 | 1182 Sat2CF  | purple | na |
| chrUn | 10754742 | 10755640 | 899 Sat2CF   | purple | na |
| chrUn | 10754805 | 10755595 | 791 Sat2CF   | purple | na |
| chrUn | 10778284 | 10779418 | 1135 Sat2CF  | purple | na |
| chrUn | 10797367 | 10798251 | 885 Sat2CF   | purple | na |
| chrUn | 10797513 | 10798251 | 739 Sat2CF   | purple | na |
| chrUn | 10820911 | 10821648 | 738 Sat2CF   | purple | na |
| chrUn | 10820985 | 10821646 | 662 Sat2CF   | purple | na |
| chrUn | 10838032 | 10839244 | 1213 Sat2CF  | purple | na |
| chrUn | 10854746 | 10855890 | 1145 Sat2CF  | purple | na |
| chrUn | 10854750 | 10856020 | 1271 Sat2CF  | purple | na |
| chrUn | 10872840 | 10873670 | 831 Sat2CF   | purple | na |
| chrUn | 10872924 | 10873649 | 726 Sat2CF   | purple | na |
| chrUn | 10883645 | 10884488 | 844 Sat2CF   | purple | na |
| chrUn | 10935585 | 10936315 | 731 Sat2CF   | purple | na |
| chrUn | 10935660 | 10936487 | 828 Sat2CF   | purple | na |
| chrUn | 10935732 | 10936469 | 738 Sat2CF   | purple | na |
| chrUn | 10960220 | 10961331 | 1112 Sat2CF  | purple | na |
| chrUn | 10961176 | 10961377 | 202 Sat2CF   | purple | na |
| chrUn | 10984139 | 10985136 | 998 Sat2CF   | purple | na |
| chrUn | 10985020 | 10985189 | 170 Sat2CF   | purple | na |
| chrUn | 10997594 | 10997984 | 391 Sat2CF   | purple | na |
| chrUn | 10997657 | 10998015 | 359 Sat2CF   | purple | na |
| chrUn | 11023379 | 11024588 | 1210 Sat2CF  | purple | na |
| chrUn | 11050878 | 11052094 | 1217 Sat2CF  | purple | na |
| chrUn | 11051006 | 11052089 | 1084 Sat2CF  | purple | na |
| chrUn | 11051965 | 11052134 | 170 Sat2CF   | purple | na |
| chrUn | 11074360 | 11075462 | 1103 Sat2CF  | purple | na |

|       |          |          |              |        |    |
|-------|----------|----------|--------------|--------|----|
| chrUn | 11075317 | 11075518 | 202 Sat2CF   | purple | na |
| chrUn | 11077156 | 11077562 | 407 CarSat1  | red    | na |
| chrUn | 11078532 | 11079385 | 854 CarSat1  | red    | na |
| chrUn | 11079406 | 11080851 | 1446 CarSat1 | red    | na |
| chrUn | 11081010 | 11082463 | 1454 CarSat1 | red    | na |
| chrUn | 11082613 | 11083462 | 850 CarSat1  | red    | na |
| chrUn | 11083490 | 11085061 | 1572 CarSat1 | red    | na |
| chrUn | 11085168 | 11086002 | 835 CarSat1  | red    | na |
| chrUn | 11091697 | 11092551 | 855 CarSat1  | red    | na |
| chrUn | 11092701 | 11094154 | 1454 CarSat1 | red    | na |
| chrUn | 11094175 | 11095029 | 855 CarSat1  | red    | na |
| chrUn | 11095179 | 11096632 | 1454 CarSat1 | red    | na |
| chrUn | 11096794 | 11097508 | 715 CarSat1  | red    | na |
| chrUn | 11097658 | 11099123 | 1466 CarSat1 | red    | na |
| chrUn | 11099154 | 11100735 | 1582 CarSat1 | red    | na |
| chrUn | 11100766 | 11101801 | 1036 CarSat1 | red    | na |
| chrUn | 11101831 | 11103275 | 1445 CarSat1 | red    | na |
| chrUn | 11103305 | 11104283 | 979 CarSat1  | red    | na |
| chrUn | 11108663 | 11109230 | 568 CarSat1  | red    | na |
| chrUn | 11109419 | 11109540 | 122 CarSat1  | red    | na |
| chrUn | 11109558 | 11110353 | 796 CarSat1  | red    | na |
| chrUn | 11110380 | 11110822 | 443 CarSat1  | red    | na |
| chrUn | 11111011 | 11112169 | 1159 CarSat1 | red    | na |
| chrUn | 11114802 | 11116052 | 1251 Sat2CF  | purple | na |
| chrUn | 11132843 | 11133698 | 856 Sat2CF   | purple | na |
| chrUn | 11148631 | 11149085 | 455 Sat2CF   | purple | na |
| chrUn | 11165438 | 11166205 | 768 Sat2CF   | purple | na |
| chrUn | 11165454 | 11166144 | 691 Sat2CF   | purple | na |
| chrUn | 11187349 | 11188052 | 704 CarSat1  | red    | na |
| chrUn | 11188082 | 11189664 | 1583 CarSat1 | red    | na |
| chrUn | 11189814 | 11190541 | 728 CarSat1  | red    | na |
| chrUn | 11190700 | 11191416 | 717 CarSat1  | red    | na |
| chrUn | 11191566 | 11192941 | 1376 CarSat1 | red    | na |
| chrUn | 11193190 | 11193816 | 627 CarSat1  | red    | na |
| chrUn | 11194045 | 11195495 | 1451 CarSat1 | red    | na |
| chrUn | 11195662 | 11196367 | 706 CarSat1  | red    | na |
| chrUn | 11196517 | 11197164 | 648 CarSat1  | red    | na |
| chrUn | 11197182 | 11197968 | 787 CarSat1  | red    | na |
| chrUn | 11198138 | 11198755 | 618 CarSat1  | red    | na |
| chrUn | 11198779 | 11199576 | 798 CarSat1  | red    | na |
| chrUn | 11199597 | 11200450 | 854 CarSat1  | red    | na |
| chrUn | 11201420 | 11201826 | 407 CarSat1  | red    | na |

|       |          |          |             |        |    |
|-------|----------|----------|-------------|--------|----|
| chrUn | 11203463 | 11203664 | 202 Sat2CF  | purple | na |
| chrUn | 11203535 | 11204621 | 1087 Sat2CF | purple | na |
| chrUn | 11203549 | 11204487 | 939 Sat2CF  | purple | na |
| chrUn | 11219157 | 11220409 | 1253 Sat2CF | purple | na |
| chrUn | 11219193 | 11220278 | 1086 Sat2CF | purple | na |
| chrUn | 11246719 | 11247233 | 515 Sat2CF  | purple | na |
| chrUn | 11258949 | 11259073 | 125 Sat2CF  | purple | na |
| chrUn | 11258962 | 11259751 | 790 Sat2CF  | purple | na |
| chrUn | 11280298 | 11281293 | 996 Sat2CF  | purple | na |
| chrUn | 11304489 | 11304690 | 202 Sat2CF  | purple | na |
| chrUn | 11304519 | 11305582 | 1064 Sat2CF | purple | na |
| chrUn | 11304651 | 11305574 | 924 Sat2CF  | purple | na |
| chrUn | 11332565 | 11333817 | 1253 Sat2CF | purple | na |
| chrUn | 11332598 | 11333687 | 1090 Sat2CF | purple | na |
| chrUn | 11369812 | 11370515 | 704 Sat2CF  | purple | na |
| chrUn | 11369898 | 11370798 | 901 Sat2CF  | purple | na |
| chrUn | 11369916 | 11370652 | 737 Sat2CF  | purple | na |
| chrUn | 11383737 | 11384808 | 1072 Sat2CF | purple | na |
| chrUn | 11413042 | 11414218 | 1177 Sat2CF | purple | na |
| chrUn | 11413071 | 11414085 | 1015 Sat2CF | purple | na |
| chrUn | 11424378 | 11424546 | 169 Sat2CF  | purple | na |
| chrUn | 11424415 | 11425246 | 832 Sat2CF  | purple | na |
| chrUn | 11424436 | 11425162 | 727 Sat2CF  | purple | na |
| chrUn | 11438618 | 11438797 | 180 Sat2CF  | purple | na |
| chrUn | 11438639 | 11438937 | 299 Sat2CF  | purple | na |
| chrUn | 11438689 | 11439857 | 1169 Sat2CF | purple | na |
| chrUn | 11454923 | 11455072 | 150 Sat2CF  | purple | na |
| chrUn | 11454943 | 11456091 | 1149 Sat2CF | purple | na |
| chrUn | 11483054 | 11483726 | 673 Sat2CF  | purple | na |
| chrUn | 11483125 | 11484008 | 884 Sat2CF  | purple | na |
| chrUn | 11508980 | 11509130 | 151 Sat2CF  | purple | na |
| chrUn | 11509005 | 11510083 | 1079 Sat2CF | purple | na |
| chrUn | 11509013 | 11509953 | 941 Sat2CF  | purple | na |
| chrUn | 11552033 | 11552173 | 141 Sat2CF  | purple | na |
| chrUn | 11552056 | 11552794 | 739 Sat2CF  | purple | na |
| chrUn | 11552058 | 11552720 | 663 Sat2CF  | purple | na |
| chrUn | 11573956 | 11574849 | 894 Sat2CF  | purple | na |
| chrUn | 11574036 | 11574773 | 738 Sat2CF  | purple | na |
| chrUn | 11574528 | 11574904 | 377 Sat2CF  | purple | na |
| chrUn | 11599230 | 11600313 | 1084 Sat2CF | purple | na |
| chrUn | 11599999 | 11600392 | 394 Sat2CF  | purple | na |
| chrUn | 11618475 | 11619728 | 1254 Sat2CF | purple | na |

|       |          |          |              |        |    |
|-------|----------|----------|--------------|--------|----|
| chrUn | 11619594 | 11619756 | 163 Sat2CF   | purple | na |
| chrUn | 11657648 | 11657828 | 181 Sat2CF   | purple | na |
| chrUn | 11657704 | 11658580 | 877 Sat2CF   | purple | na |
| chrUn | 11674170 | 11675288 | 1119 Sat2CF  | purple | na |
| chrUn | 11685155 | 11685859 | 705 CarSat1  | red    | na |
| chrUn | 11686009 | 11687456 | 1448 CarSat1 | red    | na |
| chrUn | 11687477 | 11690193 | 2717 CarSat1 | red    | na |
| chrUn | 11690198 | 11690588 | 391 SAT1_CF  | blue   | na |
| chrUn | 11690600 | 11691463 | 864 SAT1_CF  | blue   | na |
| chrUn | 11691505 | 11692753 | 1249 SAT1_CF | blue   | na |
| chrUn | 11692748 | 11693470 | 723 CarSat1  | red    | na |
| chrUn | 11693532 | 11693928 | 397 CarSat1  | red    | na |
| chrUn | 12100324 | 12100616 | 293 CarSat1  | red    | na |
| chrUn | 12216399 | 12216424 | 26 Sat19CF   | na     | na |
| chrUn | 12269855 | 12271021 | 1167 SAT1_CF | blue   | na |
| chrUn | 12271037 | 12271730 | 694 SAT1_CF  | blue   | na |
| chrUn | 12271765 | 12272730 | 966 SAT1_CF  | blue   | na |
| chrUn | 12272742 | 12273416 | 675 SAT1_CF  | blue   | na |
| chrUn | 12273429 | 12273563 | 135 SAT1_CF  | blue   | na |
| chrUn | 12273605 | 12274787 | 1183 SAT1_CF | blue   | na |
| chrUn | 12274833 | 12275376 | 544 SAT1_CF  | blue   | na |
| chrUn | 12275444 | 12275964 | 521 SAT1_CF  | blue   | na |
| chrUn | 12275976 | 12277307 | 1332 SAT1_CF | blue   | na |
| chrUn | 12277351 | 12277775 | 425 SAT1_CF  | blue   | na |
| chrUn | 12277795 | 12278306 | 512 SAT1_CF  | blue   | na |
| chrUn | 12278386 | 12278967 | 582 SAT1_CF  | blue   | na |
| chrUn | 12278979 | 12280162 | 1184 SAT1_CF | blue   | na |
| chrUn | 12280193 | 12281708 | 1516 SAT1_CF | blue   | na |
| chrUn | 12281764 | 12282265 | 502 SAT1_CF  | blue   | na |
| chrUn | 12282278 | 12283647 | 1370 SAT1_CF | blue   | na |
| chrUn | 12283689 | 12286108 | 2420 SAT1_CF | blue   | na |
| chrUn | 12286120 | 12287486 | 1367 SAT1_CF | blue   | na |
| chrUn | 12287506 | 12287989 | 484 SAT1_CF  | blue   | na |
| chrUn | 12288001 | 12288677 | 677 SAT1_CF  | blue   | na |
| chrUn | 12288720 | 12289831 | 1112 SAT1_CF | blue   | na |
| chrUn | 12289874 | 12290458 | 585 SAT1_CF  | blue   | na |
| chrUn | 12290470 | 12292067 | 1598 SAT1_CF | blue   | na |
| chrUn | 12292095 | 12292938 | 844 SAT1_CF  | blue   | na |
| chrUn | 12292980 | 12294826 | 1847 SAT1_CF | blue   | na |
| chrUn | 12294864 | 12295364 | 501 SAT1_CF  | blue   | na |
| chrUn | 12295386 | 12296060 | 675 SAT1_CF  | blue   | na |
| chrUn | 12296072 | 12296714 | 643 SAT1_CF  | blue   | na |

|       |          |          |              |      |    |
|-------|----------|----------|--------------|------|----|
| chrUn | 12296739 | 12297462 | 724 SAT1_CF  | blue | na |
| chrUn | 12297490 | 12298052 | 563 SAT1_CF  | blue | na |
| chrUn | 12298132 | 12298859 | 728 SAT1_CF  | blue | na |
| chrUn | 12298872 | 12299374 | 503 SAT1_CF  | blue | na |
| chrUn | 12299386 | 12300833 | 1448 SAT1_CF | blue | na |
| chrUn | 12300878 | 12304077 | 3200 SAT1_CF | blue | na |
| chrUn | 12304202 | 12304255 | 54 SAT1_CF   | blue | na |
| chrUn | 12304293 | 12304792 | 500 SAT1_CF  | blue | na |
| chrUn | 12304805 | 12305565 | 761 SAT1_CF  | blue | na |
| chrUn | 12305577 | 12306254 | 678 SAT1_CF  | blue | na |
| chrUn | 12306315 | 12307511 | 1197 SAT1_CF | blue | na |
| chrUn | 12307542 | 12308053 | 512 SAT1_CF  | blue | na |
| chrUn | 12308081 | 12309230 | 1150 SAT1_CF | blue | na |
| chrUn | 12309243 | 12309919 | 677 SAT1_CF  | blue | na |
| chrUn | 12309962 | 12310502 | 541 SAT1_CF  | blue | na |
| chrUn | 12310517 | 12311954 | 1438 SAT1_CF | blue | na |
| chrUn | 12312060 | 12312541 | 482 SAT1_CF  | blue | na |
| chrUn | 12312554 | 12312627 | 74 SAT1_CF   | blue | na |
| chrUn | 12312683 | 12313236 | 554 SAT1_CF  | blue | na |
| chrUn | 12313248 | 12314421 | 1174 SAT1_CF | blue | na |
| chrUn | 12314502 | 12315050 | 549 SAT1_CF  | blue | na |
| chrUn | 12315093 | 12315295 | 203 SAT1_CF  | blue | na |
| chrUn | 12315475 | 12315661 | 187 SAT1_CF  | blue | na |
| chrUn | 12315719 | 12316199 | 481 SAT1_CF  | blue | na |
| chrUn | 12316212 | 12317052 | 841 SAT1_CF  | blue | na |
| chrUn | 12317063 | 12317569 | 507 SAT1_CF  | blue | na |
| chrUn | 12317581 | 12320885 | 3305 SAT1_CF | blue | na |
| chrUn | 12320925 | 12321426 | 502 SAT1_CF  | blue | na |
| chrUn | 12321438 | 12321547 | 110 SAT1_CF  | blue | na |
| chrUn | 12321568 | 12322198 | 631 SAT1_CF  | blue | na |
| chrUn | 12322311 | 12322817 | 507 SAT1_CF  | blue | na |
| chrUn | 12322831 | 12323235 | 405 SAT1_CF  | blue | na |
| chrUn | 12323273 | 12323996 | 724 SAT1_CF  | blue | na |
| chrUn | 12324037 | 12325898 | 1862 SAT1_CF | blue | na |
| chrUn | 12325913 | 12326692 | 780 SAT1_CF  | blue | na |
| chrUn | 12326704 | 12327379 | 676 SAT1_CF  | blue | na |
| chrUn | 12327422 | 12328895 | 1474 SAT1_CF | blue | na |
| chrUn | 12328966 | 12329485 | 520 SAT1_CF  | blue | na |
| chrUn | 12329499 | 12330182 | 684 SAT1_CF  | blue | na |
| chrUn | 12330194 | 12330868 | 675 SAT1_CF  | blue | na |
| chrUn | 12330890 | 12331660 | 771 SAT1_CF  | blue | na |
| chrUn | 12331702 | 12332237 | 536 SAT1_CF  | blue | na |



|       |          |          |              |      |    |
|-------|----------|----------|--------------|------|----|
| chrUn | 12332250 | 12332586 | 337 SAT1_CF  | blue | na |
| chrUn | 12332603 | 12333730 | 1128 SAT1_CF | blue | na |
| chrUn | 12333750 | 12334512 | 763 SAT1_CF  | blue | na |
| chrUn | 12334524 | 12335194 | 671 SAT1_CF  | blue | na |
| chrUn | 12335238 | 12336858 | 1621 SAT1_CF | blue | na |
| chrUn | 12336891 | 12337311 | 421 SAT1_CF  | blue | na |
| chrUn | 12337351 | 12337850 | 500 SAT1_CF  | blue | na |
| chrUn | 12337863 | 12338566 | 704 SAT1_CF  | blue | na |
| chrUn | 12338578 | 12339826 | 1249 SAT1_CF | blue | na |
| chrUn | 12339848 | 12340514 | 667 SAT1_CF  | blue | na |
| chrUn | 12340558 | 12341217 | 660 SAT1_CF  | blue | na |
| chrUn | 12341235 | 12341747 | 513 SAT1_CF  | blue | na |
| chrUn | 12341775 | 12341910 | 136 SAT1_CF  | blue | na |
| chrUn | 12341976 | 12342477 | 502 SAT1_CF  | blue | na |
| chrUn | 12342504 | 12343252 | 749 SAT1_CF  | blue | na |
| chrUn | 12343264 | 12344542 | 1279 SAT1_CF | blue | na |
| chrUn | 12344592 | 12345390 | 799 SAT1_CF  | blue | na |
| chrUn | 12345418 | 12346119 | 702 SAT1_CF  | blue | na |
| chrUn | 12346132 | 12346237 | 106 SAT1_CF  | blue | na |
| chrUn | 12346260 | 12347954 | 1695 SAT1_CF | blue | na |
| chrUn | 12347997 | 12350023 | 2027 SAT1_CF | blue | na |
| chrUn | 12350078 | 12351052 | 975 SAT1_CF  | blue | na |
| chrUn | 12351158 | 12351599 | 442 SAT1_CF  | blue | na |
| chrUn | 12351611 | 12352286 | 676 SAT1_CF  | blue | na |
| chrUn | 12352333 | 12354312 | 1980 SAT1_CF | blue | na |
| chrUn | 12354401 | 12354894 | 494 SAT1_CF  | blue | na |
| chrUn | 12354909 | 12354987 | 79 SAT1_CF   | blue | na |
| chrUn | 12355043 | 12356084 | 1042 SAT1_CF | blue | na |
| chrUn | 12356099 | 12356255 | 157 SAT1_CF  | blue | na |
| chrUn | 12356300 | 12356799 | 500 SAT1_CF  | blue | na |
| chrUn | 12356812 | 12358188 | 1377 SAT1_CF | blue | na |
| chrUn | 12358202 | 12358590 | 389 SAT1_CF  | blue | na |
| chrUn | 12358694 | 12359236 | 543 SAT1_CF  | blue | na |
| chrUn | 12359248 | 12360568 | 1321 SAT1_CF | blue | na |
| chrUn | 12360592 | 12360952 | 361 SAT1_CF  | blue | na |
| chrUn | 12360996 | 12361504 | 509 SAT1_CF  | blue | na |
| chrUn | 12361540 | 12361917 | 378 SAT1_CF  | blue | na |
| chrUn | 12361957 | 12362458 | 502 SAT1_CF  | blue | na |
| chrUn | 12362471 | 12363231 | 761 SAT1_CF  | blue | na |
| chrUn | 12363243 | 12364375 | 1133 SAT1_CF | blue | na |
| chrUn | 12364387 | 12366512 | 2126 SAT1_CF | blue | na |
| chrUn | 12366592 | 12367130 | 539 SAT1_CF  | blue | na |

|       |          |          |              |      |    |
|-------|----------|----------|--------------|------|----|
| chrUn | 12367176 | 12367722 | 547 SAT1_CF  | blue | na |
| chrUn | 12367734 | 12368131 | 398 SAT1_CF  | blue | na |
| chrUn | 12368174 | 12368676 | 503 SAT1_CF  | blue | na |
| chrUn | 12368689 | 12368796 | 108 SAT1_CF  | blue | na |
| chrUn | 12368818 | 12370601 | 1784 SAT1_CF | blue | na |
| chrUn | 12370644 | 12371526 | 883 SAT1_CF  | blue | na |
| chrUn | 12371557 | 12372102 | 546 SAT1_CF  | blue | na |
| chrUn | 12372146 | 12373963 | 1818 SAT1_CF | blue | na |
| chrUn | 12374023 | 12374504 | 482 SAT1_CF  | blue | na |
| chrUn | 12374517 | 12374625 | 109 SAT1_CF  | blue | na |
| chrUn | 12374644 | 12375316 | 673 SAT1_CF  | blue | na |
| chrUn | 12375339 | 12375884 | 546 SAT1_CF  | blue | na |
| chrUn | 12375926 | 12376910 | 985 SAT1_CF  | blue | na |
| chrUn | 12376936 | 12377792 | 857 SAT1_CF  | blue | na |
| chrUn | 12377804 | 12378843 | 1040 SAT1_CF | blue | na |
| chrUn | 12378869 | 12381611 | 2743 SAT1_CF | blue | na |
| chrUn | 12381624 | 12382305 | 682 SAT1_CF  | blue | na |
| chrUn | 12382320 | 12383176 | 857 SAT1_CF  | blue | na |
| chrUn | 12383216 | 12383755 | 540 SAT1_CF  | blue | na |
| chrUn | 12383793 | 12385035 | 1243 SAT1_CF | blue | na |
| chrUn | 12385071 | 12385571 | 501 SAT1_CF  | blue | na |
| chrUn | 12385583 | 12386257 | 675 SAT1_CF  | blue | na |
| chrUn | 12386296 | 12388109 | 1814 SAT1_CF | blue | na |
| chrUn | 12388141 | 12388598 | 458 SAT1_CF  | blue | na |
| chrUn | 12388613 | 12388748 | 136 SAT1_CF  | blue | na |
| chrUn | 12388814 | 12389315 | 502 SAT1_CF  | blue | na |
| chrUn | 12389327 | 12390693 | 1367 SAT1_CF | blue | na |
| chrUn | 12390706 | 12391596 | 891 SAT1_CF  | blue | na |
| chrUn | 12391607 | 12391926 | 320 SAT1_CF  | blue | na |
| chrUn | 12391999 | 12393176 | 1178 SAT1_CF | blue | na |
| chrUn | 12393190 | 12394306 | 1117 SAT1_CF | blue | na |
| chrUn | 12394333 | 12395467 | 1135 SAT1_CF | blue | na |
| chrUn | 12395479 | 12396812 | 1334 SAT1_CF | blue | na |
| chrUn | 12396837 | 12397041 | 205 SAT1_CF  | blue | na |
| chrUn | 12397092 | 12397654 | 563 SAT1_CF  | blue | na |
| chrUn | 12399069 | 12399641 | 573 SAT1_CF  | blue | na |
| chrUn | 12399681 | 12400186 | 506 SAT1_CF  | blue | na |
| chrUn | 12400199 | 12400305 | 107 SAT1_CF  | blue | na |
| chrUn | 12400326 | 12400871 | 546 SAT1_CF  | blue | na |
| chrUn | 12400913 | 12402947 | 2035 SAT1_CF | blue | na |
| chrUn | 12402993 | 12403486 | 494 SAT1_CF  | blue | na |
| chrUn | 12403516 | 12404164 | 649 SAT1_CF  | blue | na |

|       |          |          |              |      |    |
|-------|----------|----------|--------------|------|----|
| chrUn | 12404196 | 12404700 | 505 SAT1_CF  | blue | na |
| chrUn | 12404732 | 12405436 | 705 SAT1_CF  | blue | na |
| chrUn | 12405449 | 12405555 | 107 SAT1_CF  | blue | na |
| chrUn | 12405580 | 12407170 | 1591 SAT1_CF | blue | na |
| chrUn | 12407184 | 12407732 | 549 SAT1_CF  | blue | na |
| chrUn | 12407745 | 12408287 | 543 SAT1_CF  | blue | na |
| chrUn | 12408300 | 12408883 | 584 SAT1_CF  | blue | na |
| chrUn | 12408914 | 12410516 | 1603 SAT1_CF | blue | na |
| chrUn | 12410583 | 12411105 | 523 SAT1_CF  | blue | na |
| chrUn | 12411148 | 12411350 | 203 SAT1_CF  | blue | na |
| chrUn | 12411530 | 12411715 | 186 SAT1_CF  | blue | na |
| chrUn | 12411751 | 12412251 | 501 SAT1_CF  | blue | na |
| chrUn | 12412264 | 12412877 | 614 SAT1_CF  | blue | na |
| chrUn | 12412895 | 12413563 | 669 SAT1_CF  | blue | na |
| chrUn | 12413607 | 12414259 | 653 SAT1_CF  | blue | na |
| chrUn | 12414291 | 12415233 | 943 SAT1_CF  | blue | na |
| chrUn | 12415276 | 12416956 | 1681 SAT1_CF | blue | na |
| chrUn | 12416968 | 12417689 | 722 SAT1_CF  | blue | na |
| chrUn | 12417712 | 12418443 | 732 SAT1_CF  | blue | na |
| chrUn | 12418456 | 12419038 | 583 SAT1_CF  | blue | na |
| chrUn | 12419070 | 12420067 | 998 SAT1_CF  | blue | na |
| chrUn | 12420087 | 12420194 | 108 SAT1_CF  | blue | na |
| chrUn | 12420215 | 12421405 | 1191 SAT1_CF | blue | na |
| chrUn | 12421474 | 12421845 | 372 SAT1_CF  | blue | na |
| chrUn | 12421932 | 12422511 | 580 SAT1_CF  | blue | na |
| chrUn | 12422574 | 12424795 | 2222 SAT1_CF | blue | na |
| chrUn | 12424809 | 12426173 | 1365 SAT1_CF | blue | na |
| chrUn | 12426215 | 12426354 | 140 SAT1_CF  | blue | na |
| chrUn | 12426377 | 12426992 | 616 SAT1_CF  | blue | na |
| chrUn | 12427004 | 12427680 | 677 SAT1_CF  | blue | na |
| chrUn | 12427729 | 12428704 | 976 SAT1_CF  | blue | na |
| chrUn | 12428746 | 12429253 | 508 SAT1_CF  | blue | na |
| chrUn | 12429267 | 12429669 | 403 SAT1_CF  | blue | na |
| chrUn | 12429709 | 12430211 | 503 SAT1_CF  | blue | na |
| chrUn | 12430224 | 12430331 | 108 SAT1_CF  | blue | na |
| chrUn | 12430353 | 12430906 | 554 SAT1_CF  | blue | na |
| chrUn | 12430919 | 12431564 | 646 SAT1_CF  | blue | na |
| chrUn | 12431576 | 12432910 | 1335 SAT1_CF | blue | na |
| chrUn | 12432925 | 12433789 | 865 SAT1_CF  | blue | na |
| chrUn | 12433968 | 12434152 | 185 SAT1_CF  | blue | na |
| chrUn | 12434173 | 12434690 | 518 SAT1_CF  | blue | na |
| chrUn | 12434717 | 12435594 | 878 SAT1_CF  | blue | na |

|       |          |          |              |      |    |
|-------|----------|----------|--------------|------|----|
| chrUn | 12435636 | 12436178 | 543 SAT1_CF  | blue | na |
| chrUn | 12436189 | 12436888 | 700 SAT1_CF  | blue | na |
| chrUn | 12436935 | 12437784 | 850 SAT1_CF  | blue | na |
| chrUn | 12437797 | 12438060 | 264 SAT1_CF  | blue | na |
| chrUn | 12438149 | 12438669 | 521 SAT1_CF  | blue | na |
| chrUn | 12438683 | 12441248 | 2566 SAT1_CF | blue | na |
| chrUn | 12441261 | 12441665 | 405 SAT1_CF  | blue | na |
| chrUn | 12441703 | 12442205 | 503 SAT1_CF  | blue | na |
| chrUn | 12442218 | 12442323 | 106 SAT1_CF  | blue | na |
| chrUn | 12442346 | 12442898 | 553 SAT1_CF  | blue | na |
| chrUn | 12442910 | 12443593 | 684 SAT1_CF  | blue | na |
| chrUn | 12443605 | 12444364 | 760 SAT1_CF  | blue | na |
| chrUn | 12444378 | 12445051 | 674 SAT1_CF  | blue | na |
| chrUn | 12445094 | 12446092 | 999 SAT1_CF  | blue | na |
| chrUn | 12446136 | 12447310 | 1175 SAT1_CF | blue | na |
| chrUn | 12447338 | 12447495 | 158 SAT1_CF  | blue | na |
| chrUn | 12447540 | 12448041 | 502 SAT1_CF  | blue | na |
| chrUn | 12448054 | 12448160 | 107 SAT1_CF  | blue | na |
| chrUn | 12448183 | 12448974 | 792 SAT1_CF  | blue | na |
| chrUn | 12449016 | 12450621 | 1606 SAT1_CF | blue | na |
| chrUn | 12450635 | 12451337 | 703 SAT1_CF  | blue | na |
| chrUn | 12451419 | 12453178 | 1760 SAT1_CF | blue | na |
| chrUn | 12453189 | 12454223 | 1035 SAT1_CF | blue | na |
| chrUn | 12454279 | 12455361 | 1083 SAT1_CF | blue | na |
| chrUn | 12455410 | 12455502 | 93 SAT1_CF   | blue | na |
| chrUn | 12455559 | 12456116 | 558 SAT1_CF  | blue | na |
| chrUn | 12456128 | 12457843 | 1716 SAT1_CF | blue | na |
| chrUn | 12457869 | 12458505 | 637 SAT1_CF  | blue | na |
| chrUn | 12458518 | 12458871 | 354 SAT1_CF  | blue | na |
| chrUn | 12458988 | 12459507 | 520 SAT1_CF  | blue | na |
| chrUn | 12459538 | 12460611 | 1074 SAT1_CF | blue | na |
| chrUn | 12460625 | 12461514 | 890 SAT1_CF  | blue | na |
| chrUn | 12461601 | 12462101 | 501 SAT1_CF  | blue | na |
| chrUn | 12462115 | 12462872 | 758 SAT1_CF  | blue | na |
| chrUn | 12462884 | 12462993 | 110 SAT1_CF  | blue | na |
| chrUn | 12463014 | 12463558 | 545 SAT1_CF  | blue | na |
| chrUn | 12463607 | 12464614 | 1008 SAT1_CF | blue | na |
| chrUn | 12464628 | 12465488 | 861 SAT1_CF  | blue | na |
| chrUn | 12465529 | 12467224 | 1696 SAT1_CF | blue | na |
| chrUn | 12467405 | 12467588 | 184 SAT1_CF  | blue | na |
| chrUn | 12467607 | 12468127 | 521 SAT1_CF  | blue | na |
| chrUn | 12468140 | 12468245 | 106 SAT1_CF  | blue | na |

|       |          |          |              |      |    |
|-------|----------|----------|--------------|------|----|
| chrUn | 12468268 | 12469538 | 1271 SAT1_CF | blue | na |
| chrUn | 12469553 | 12469688 | 136 SAT1_CF  | blue | na |
| chrUn | 12469733 | 12470254 | 522 SAT1_CF  | blue | na |
| chrUn | 12470266 | 12471601 | 1336 SAT1_CF | blue | na |
| chrUn | 12471645 | 12473681 | 2037 SAT1_CF | blue | na |
| chrUn | 12473739 | 12474217 | 479 SAT1_CF  | blue | na |
| chrUn | 12474235 | 12474345 | 111 SAT1_CF  | blue | na |
| chrUn | 12474358 | 12475533 | 1176 SAT1_CF | blue | na |
| chrUn | 12475566 | 12475722 | 157 SAT1_CF  | blue | na |
| chrUn | 12475747 | 12476267 | 521 SAT1_CF  | blue | na |
| chrUn | 12476280 | 12476954 | 675 SAT1_CF  | blue | na |
| chrUn | 12476997 | 12479036 | 2040 SAT1_CF | blue | na |
| chrUn | 12479104 | 12481207 | 2104 SAT1_CF | blue | na |
| chrUn | 12481258 | 12482048 | 791 SAT1_CF  | blue | na |
| chrUn | 12482092 | 12482633 | 542 SAT1_CF  | blue | na |
| chrUn | 12482653 | 12482816 | 164 SAT1_CF  | blue | na |
| chrUn | 12482829 | 12483231 | 403 SAT1_CF  | blue | na |
| chrUn | 12483291 | 12483766 | 476 SAT1_CF  | blue | na |
| chrUn | 12483800 | 12484941 | 1142 SAT1_CF | blue | na |
| chrUn | 12485262 | 12485568 | 307 SAT1_CF  | blue | na |
| chrUn | 12485684 | 12486560 | 877 SAT1_CF  | blue | na |
| chrUn | 12486647 | 12487148 | 502 SAT1_CF  | blue | na |
| chrUn | 12487161 | 12489080 | 1920 SAT1_CF | blue | na |
| chrUn | 12489092 | 12489201 | 110 SAT1_CF  | blue | na |
| chrUn | 12489222 | 12489849 | 628 SAT1_CF  | blue | na |
| chrUn | 12489863 | 12490537 | 675 SAT1_CF  | blue | na |
| chrUn | 12490656 | 12491196 | 541 SAT1_CF  | blue | na |
| chrUn | 12491240 | 12492207 | 968 SAT1_CF  | blue | na |
| chrUn | 12492252 | 12492622 | 371 SAT1_CF  | blue | na |
| chrUn | 12492678 | 12493157 | 480 SAT1_CF  | blue | na |
| chrUn | 12493184 | 12494615 | 1432 SAT1_CF | blue | na |
| chrUn | 12494658 | 12495286 | 629 SAT1_CF  | blue | na |
| chrUn | 12495316 | 12497019 | 1704 SAT1_CF | blue | na |
| chrUn | 12497052 | 12497188 | 137 SAT1_CF  | blue | na |
| chrUn | 12497254 | 12497755 | 502 SAT1_CF  | blue | na |
| chrUn | 12497767 | 12498444 | 678 SAT1_CF  | blue | na |
| chrUn | 12498487 | 12500111 | 1625 SAT1_CF | blue | na |
| chrUn | 12500124 | 12500491 | 368 SAT1_CF  | blue | na |
| chrUn | 12500529 | 12501920 | 1392 SAT1_CF | blue | na |
| chrUn | 12501938 | 12501994 | 57 SAT1_CF   | blue | na |
| chrUn | 12502014 | 12502686 | 673 SAT1_CF  | blue | na |
| chrUn | 12502700 | 12503248 | 549 SAT1_CF  | blue | na |

|       |          |          |              |      |    |
|-------|----------|----------|--------------|------|----|
| chrUn | 12503291 | 12505684 | 2394 SAT1_CF | blue | na |
| chrUn | 12505696 | 12506010 | 315 SAT1_CF  | blue | na |
| chrUn | 12506027 | 12506527 | 501 SAT1_CF  | blue | na |
| chrUn | 12506540 | 12507866 | 1327 SAT1_CF | blue | na |
| chrUn | 12507911 | 12509123 | 1213 SAT1_CF | blue | na |
| chrUn | 12509145 | 12509688 | 544 SAT1_CF  | blue | na |
| chrUn | 12509701 | 12509936 | 236 SAT1_CF  | blue | na |
| chrUn | 12510116 | 12510283 | 168 SAT1_CF  | blue | na |
| chrUn | 12510357 | 12510828 | 472 SAT1_CF  | blue | na |
| chrUn | 12510851 | 12512037 | 1187 SAT1_CF | blue | na |
| chrUn | 12513497 | 12513879 | 383 SAT1_CF  | blue | na |
| chrUn | 12513957 | 12515403 | 1447 SAT1_CF | blue | na |
| chrUn | 12515414 | 12515601 | 188 SAT1_CF  | blue | na |
| chrUn | 12515874 | 12516573 | 700 SAT1_CF  | blue | na |
| chrUn | 12516586 | 12517348 | 763 SAT1_CF  | blue | na |
| chrUn | 12517360 | 12518034 | 675 SAT1_CF  | blue | na |
| chrUn | 12518077 | 12519701 | 1625 SAT1_CF | blue | na |
| chrUn | 12519717 | 12520102 | 386 SAT1_CF  | blue | na |
| chrUn | 12520136 | 12520656 | 521 SAT1_CF  | blue | na |
| chrUn | 12520668 | 12522719 | 2052 SAT1_CF | blue | na |
| chrUn | 12522762 | 12523021 | 260 SAT1_CF  | blue | na |
| chrUn | 12523040 | 12523559 | 520 SAT1_CF  | blue | na |
| chrUn | 12523572 | 12525546 | 1975 SAT1_CF | blue | na |
| chrUn | 12525560 | 12525697 | 138 SAT1_CF  | blue | na |
| chrUn | 12525712 | 12526105 | 394 SAT1_CF  | blue | na |
| chrUn | 12631070 | 12631396 | 327 SAT1_CF  | blue | na |
| chrUn | 12631469 | 12632563 | 1095 SAT1_CF | blue | na |
| chrUn | 12632612 | 12633132 | 521 SAT1_CF  | blue | na |
| chrUn | 12633146 | 12633385 | 240 SAT1_CF  | blue | na |
| chrUn | 12633564 | 12633748 | 185 SAT1_CF  | blue | na |
| chrUn | 12633769 | 12634285 | 517 SAT1_CF  | blue | na |
| chrUn | 12634303 | 12634968 | 666 SAT1_CF  | blue | na |
| chrUn | 12635011 | 12636674 | 1664 SAT1_CF | blue | na |
| chrUn | 12636717 | 12637864 | 1148 SAT1_CF | blue | na |
| chrUn | 12637887 | 12638411 | 525 SAT1_CF  | blue | na |
| chrUn | 12638468 | 12639198 | 731 SAT1_CF  | blue | na |
| chrUn | 12639211 | 12640062 | 852 SAT1_CF  | blue | na |
| chrUn | 12640080 | 12640692 | 613 SAT1_CF  | blue | na |
| chrUn | 12640734 | 12641800 | 1067 SAT1_CF | blue | na |
| chrUn | 12641981 | 12642162 | 182 SAT1_CF  | blue | na |
| chrUn | 12642222 | 12642781 | 560 SAT1_CF  | blue | na |
| chrUn | 12642843 | 12643472 | 630 SAT1_CF  | blue | na |

|       |          |          |              |      |    |
|-------|----------|----------|--------------|------|----|
| chrUn | 12643486 | 12644160 | 675 SAT1_CF  | blue | na |
| chrUn | 12644203 | 12645858 | 1656 SAT1_CF | blue | na |
| chrUn | 12645870 | 12646211 | 342 SAT1_CF  | blue | na |
| chrUn | 12646295 | 12646777 | 483 SAT1_CF  | blue | na |
| chrUn | 12646790 | 12648361 | 1572 SAT1_CF | blue | na |
| chrUn | 12648428 | 12649277 | 850 SAT1_CF  | blue | na |
| chrUn | 12649364 | 12651172 | 1809 SAT1_CF | blue | na |
| chrUn | 12651221 | 12651923 | 703 SAT1_CF  | blue | na |
| chrUn | 12651969 | 12652495 | 527 SAT1_CF  | blue | na |
| chrUn | 12652552 | 12653026 | 475 SAT1_CF  | blue | na |
| chrUn | 12653053 | 12653643 | 591 SAT1_CF  | blue | na |
| chrUn | 12653657 | 12654344 | 688 SAT1_CF  | blue | na |
| chrUn | 12654388 | 12655464 | 1077 SAT1_CF | blue | na |
| chrUn | 12655508 | 12656468 | 961 SAT1_CF  | blue | na |
| chrUn | 12656528 | 12657458 | 931 SAT1_CF  | blue | na |
| chrUn | 12657470 | 12658801 | 1332 SAT1_CF | blue | na |
| chrUn | 12658825 | 12659150 | 326 SAT1_CF  | blue | na |
| chrUn | 12659229 | 12660191 | 963 SAT1_CF  | blue | na |
| chrUn | 12660229 | 12661600 | 1372 SAT1_CF | blue | na |
| chrUn | 12661613 | 12662463 | 851 SAT1_CF  | blue | na |
| chrUn | 12662481 | 12663625 | 1145 SAT1_CF | blue | na |
| chrUn | 12663668 | 12664211 | 544 SAT1_CF  | blue | na |
| chrUn | 12664223 | 12664896 | 674 SAT1_CF  | blue | na |
| chrUn | 12664966 | 12665441 | 476 SAT1_CF  | blue | na |
| chrUn | 12665453 | 12666119 | 667 SAT1_CF  | blue | na |
| chrUn | 12666167 | 12667786 | 1620 SAT1_CF | blue | na |
| chrUn | 12667818 | 12668183 | 366 SAT1_CF  | blue | na |
| chrUn | 12668217 | 12668738 | 522 SAT1_CF  | blue | na |
| chrUn | 12668780 | 12669092 | 313 SAT1_CF  | blue | na |
| chrUn | 12669134 | 12669779 | 646 SAT1_CF  | blue | na |
| chrUn | 12669833 | 12670422 | 590 SAT1_CF  | blue | na |
| chrUn | 12671829 | 12672346 | 518 SAT1_CF  | blue | na |
| chrUn | 12672433 | 12672927 | 495 SAT1_CF  | blue | na |
| chrUn | 12672947 | 12673629 | 683 SAT1_CF  | blue | na |
| chrUn | 12673652 | 12674315 | 664 SAT1_CF  | blue | na |
| chrUn | 12674358 | 12674989 | 632 SAT1_CF  | blue | na |
| chrUn | 12675017 | 12676219 | 1203 SAT1_CF | blue | na |
| chrUn | 12676238 | 12676374 | 137 SAT1_CF  | blue | na |
| chrUn | 12676421 | 12676942 | 522 SAT1_CF  | blue | na |
| chrUn | 12676964 | 12677598 | 635 SAT1_CF  | blue | na |
| chrUn | 12677611 | 12678937 | 1327 SAT1_CF | blue | na |
| chrUn | 12679018 | 12679737 | 720 SAT1_CF  | blue | na |

|       |          |          |              |      |    |
|-------|----------|----------|--------------|------|----|
| chrUn | 12679751 | 12680188 | 438 SAT1_CF  | blue | na |
| chrUn | 12680211 | 12680892 | 682 SAT1_CF  | blue | na |
| chrUn | 12680904 | 12681754 | 851 SAT1_CF  | blue | na |
| chrUn | 12681772 | 12682383 | 612 SAT1_CF  | blue | na |
| chrUn | 12682425 | 12683248 | 824 SAT1_CF  | blue | na |
| chrUn | 12683291 | 12683657 | 367 SAT1_CF  | blue | na |
| chrUn | 12683729 | 12684248 | 520 SAT1_CF  | blue | na |
| chrUn | 12684305 | 12684851 | 547 SAT1_CF  | blue | na |
| chrUn | 12684893 | 12685619 | 727 SAT1_CF  | blue | na |
| chrUn | 12685664 | 12686199 | 536 SAT1_CF  | blue | na |
| chrUn | 12686221 | 12686739 | 519 SAT1_CF  | blue | na |
| chrUn | 12686751 | 12688068 | 1318 SAT1_CF | blue | na |
| chrUn | 12688081 | 12688916 | 836 SAT1_CF  | blue | na |
| chrUn | 12688929 | 12689632 | 704 SAT1_CF  | blue | na |
| chrUn | 12689644 | 12692131 | 2488 SAT1_CF | blue | na |
| chrUn | 12692199 | 12692717 | 519 SAT1_CF  | blue | na |
| chrUn | 12692729 | 12693488 | 760 SAT1_CF  | blue | na |
| chrUn | 12693502 | 12694834 | 1333 SAT1_CF | blue | na |
| chrUn | 12694878 | 12695808 | 931 SAT1_CF  | blue | na |
| chrUn | 12695821 | 12696141 | 321 SAT1_CF  | blue | na |
| chrUn | 12699170 | 12700783 | 1614 SAT1_CF | blue | na |
| chrUn | 12700825 | 12700989 | 165 SAT1_CF  | blue | na |
| chrUn | 12701171 | 12701356 | 186 SAT1_CF  | blue | na |
| chrUn | 12701373 | 12701891 | 519 SAT1_CF  | blue | na |
| chrUn | 12701905 | 12703710 | 1806 SAT1_CF | blue | na |
| chrUn | 12703754 | 12704714 | 961 SAT1_CF  | blue | na |
| chrUn | 12704774 | 12705644 | 871 SAT1_CF  | blue | na |
| chrUn | 12706530 | 12706663 | 134 SAT1_CF  | blue | na |
| chrUn | 12706721 | 12707221 | 501 SAT1_CF  | blue | na |
| chrUn | 12707235 | 12707918 | 684 SAT1_CF  | blue | na |
| chrUn | 12707930 | 12708615 | 686 SAT1_CF  | blue | na |
| chrUn | 12708627 | 12708735 | 109 SAT1_CF  | blue | na |
| chrUn | 12708755 | 12709705 | 951 SAT1_CF  | blue | na |
| chrUn | 12709739 | 12710258 | 520 SAT1_CF  | blue | na |
| chrUn | 12710270 | 12710956 | 687 SAT1_CF  | blue | na |
| chrUn | 12710980 | 12712666 | 1687 SAT1_CF | blue | na |
| chrUn | 12712746 | 12713292 | 547 SAT1_CF  | blue | na |
| chrUn | 12713340 | 12713740 | 401 SAT1_CF  | blue | na |
| chrUn | 12713800 | 12714370 | 571 SAT1_CF  | blue | na |
| chrUn | 12714389 | 12715878 | 1490 SAT1_CF | blue | na |
| chrUn | 12715957 | 12716912 | 956 SAT1_CF  | blue | na |
| chrUn | 12716939 | 12718497 | 1559 SAT1_CF | blue | na |



|       |          |          |              |      |    |
|-------|----------|----------|--------------|------|----|
| chrUn | 12718546 | 12719139 | 594 SAT1_CF  | blue | na |
| chrUn | 12720536 | 12721109 | 574 SAT1_CF  | blue | na |
| chrUn | 12721149 | 12721643 | 495 SAT1_CF  | blue | na |
| chrUn | 12721663 | 12722345 | 683 SAT1_CF  | blue | na |
| chrUn | 12722368 | 12723034 | 667 SAT1_CF  | blue | na |
| chrUn | 12723077 | 12723706 | 630 SAT1_CF  | blue | na |
| chrUn | 12723734 | 12724926 | 1193 SAT1_CF | blue | na |
| chrUn | 12724954 | 12725090 | 137 SAT1_CF  | blue | na |
| chrUn | 12725136 | 12725658 | 523 SAT1_CF  | blue | na |
| chrUn | 12725680 | 12728060 | 2381 SAT1_CF | blue | na |
| chrUn | 12728071 | 12728563 | 493 SAT1_CF  | blue | na |
| chrUn | 12728577 | 12729942 | 1366 SAT1_CF | blue | na |
| chrUn | 12730007 | 12730569 | 563 SAT1_CF  | blue | na |
| chrUn | 12730612 | 12731165 | 554 SAT1_CF  | blue | na |
| chrUn | 12731187 | 12731852 | 666 SAT1_CF  | blue | na |
| chrUn | 12731895 | 12732784 | 890 SAT1_CF  | blue | na |
| chrUn | 12732798 | 12733683 | 886 SAT1_CF  | blue | na |
| chrUn | 12733694 | 12734387 | 694 SAT1_CF  | blue | na |
| chrUn | 12734399 | 12735079 | 681 SAT1_CF  | blue | na |
| chrUn | 12735121 | 12735381 | 261 SAT1_CF  | blue | na |
| chrUn | 12735405 | 12736065 | 661 SAT1_CF  | blue | na |
| chrUn | 12736083 | 12736584 | 502 SAT1_CF  | blue | na |
| chrUn | 12736617 | 12738132 | 1516 SAT1_CF | blue | na |
| chrUn | 12738158 | 12738700 | 543 SAT1_CF  | blue | na |
| chrUn | 12738786 | 12739109 | 324 SAT1_CF  | blue | na |
| chrUn | 12739185 | 12739815 | 631 SAT1_CF  | blue | na |
| chrUn | 12739871 | 12741108 | 1238 SAT1_CF | blue | na |
| chrUn | 12741120 | 12742756 | 1637 SAT1_CF | blue | na |
| chrUn | 12742768 | 12743428 | 661 SAT1_CF  | blue | na |
| chrUn | 12743480 | 12744287 | 808 SAT1_CF  | blue | na |
| chrUn | 12744319 | 12744824 | 506 SAT1_CF  | blue | na |
| chrUn | 12744836 | 12745513 | 678 SAT1_CF  | blue | na |
| chrUn | 12745582 | 12747791 | 2210 SAT1_CF | blue | na |
| chrUn | 12747824 | 12748184 | 361 SAT1_CF  | blue | na |
| chrUn | 12748203 | 12748720 | 518 SAT1_CF  | blue | na |
| chrUn | 12748738 | 12748841 | 104 SAT1_CF  | blue | na |
| chrUn | 12748862 | 12749436 | 575 SAT1_CF  | blue | na |
| chrUn | 12749448 | 12750107 | 660 SAT1_CF  | blue | na |
| chrUn | 12750155 | 12750695 | 541 SAT1_CF  | blue | na |
| chrUn | 12750717 | 12751383 | 667 SAT1_CF  | blue | na |
| chrUn | 12751427 | 12751915 | 489 SAT1_CF  | blue | na |
| chrUn | 12751956 | 12752624 | 669 SAT1_CF  | blue | na |

|       |          |          |              |      |    |
|-------|----------|----------|--------------|------|----|
| chrUn | 12752644 | 12752779 | 136 SAT1_CF  | blue | na |
| chrUn | 12752845 | 12753346 | 502 SAT1_CF  | blue | na |
| chrUn | 12753373 | 12754121 | 749 SAT1_CF  | blue | na |
| chrUn | 12754133 | 12754808 | 676 SAT1_CF  | blue | na |
| chrUn | 12754851 | 12755392 | 542 SAT1_CF  | blue | na |
| chrUn | 12755405 | 12755905 | 501 SAT1_CF  | blue | na |
| chrUn | 12755918 | 12756023 | 106 SAT1_CF  | blue | na |
| chrUn | 12756046 | 12756615 | 570 SAT1_CF  | blue | na |
| chrUn | 12756649 | 12757985 | 1337 SAT1_CF | blue | na |
| chrUn | 12758013 | 12759902 | 1890 SAT1_CF | blue | na |
| chrUn | 12759935 | 12760956 | 1022 SAT1_CF | blue | na |
| chrUn | 12760997 | 12761498 | 502 SAT1_CF  | blue | na |
| chrUn | 12761511 | 12761575 | 65 SAT1_CF   | blue | na |
| chrUn | 12761639 | 12762851 | 1213 SAT1_CF | blue | na |
| chrUn | 12762895 | 12764916 | 2022 SAT1_CF | blue | na |
| chrUn | 12764972 | 12765446 | 475 SAT1_CF  | blue | na |
| chrUn | 12765478 | 12765982 | 505 SAT1_CF  | blue | na |
| chrUn | 12766014 | 12766150 | 137 SAT1_CF  | blue | na |
| chrUn | 12766216 | 12766717 | 502 SAT1_CF  | blue | na |
| chrUn | 12766730 | 12767332 | 603 SAT1_CF  | blue | na |
| chrUn | 12767344 | 12768019 | 676 SAT1_CF  | blue | na |
| chrUn | 12768062 | 12769581 | 1520 SAT1_CF | blue | na |
| chrUn | 12771165 | 12771914 | 750 SAT1_CF  | blue | na |
| chrUn | 12771926 | 12773731 | 1806 SAT1_CF | blue | na |
| chrUn | 12773749 | 12774681 | 933 SAT1_CF  | blue | na |
| chrUn | 12774724 | 12775226 | 503 SAT1_CF  | blue | na |
| chrUn | 12775238 | 12775923 | 686 SAT1_CF  | blue | na |
| chrUn | 12775966 | 12776514 | 549 SAT1_CF  | blue | na |
| chrUn | 12776556 | 12777337 | 782 SAT1_CF  | blue | na |
| chrUn | 12777416 | 12778375 | 960 SAT1_CF  | blue | na |
| chrUn | 12778415 | 12778916 | 502 SAT1_CF  | blue | na |
| chrUn | 12778929 | 12779609 | 681 SAT1_CF  | blue | na |
| chrUn | 12779627 | 12780215 | 589 SAT1_CF  | blue | na |
| chrUn | 12780227 | 12780310 | 84 SAT1_CF   | blue | na |
| chrUn | 12780323 | 12781275 | 953 SAT1_CF  | blue | na |
| chrUn | 12781323 | 12781814 | 492 SAT1_CF  | blue | na |
| chrUn | 12781840 | 12782443 | 604 SAT1_CF  | blue | na |
| chrUn | 12782455 | 12786029 | 3575 SAT1_CF | blue | na |
| chrUn | 12786065 | 12786566 | 502 SAT1_CF  | blue | na |
| chrUn | 12786578 | 12786694 | 117 SAT1_CF  | blue | na |
| chrUn | 12786708 | 12787233 | 526 SAT1_CF  | blue | na |
| chrUn | 12787289 | 12787835 | 547 SAT1_CF  | blue | na |

|       |          |          |      |         |      |    |
|-------|----------|----------|------|---------|------|----|
| chrUn | 12787878 | 12788411 | 534  | SAT1_CF | blue | na |
| chrUn | 12788425 | 12789507 | 1083 | SAT1_CF | blue | na |
| chrUn | 12789518 | 12789674 | 157  | SAT1_CF | blue | na |
| chrUn | 12789721 | 12790242 | 522  | SAT1_CF | blue | na |
| chrUn | 12790255 | 12790861 | 607  | SAT1_CF | blue | na |
| chrUn | 12790873 | 12791549 | 677  | SAT1_CF | blue | na |
| chrUn | 12791592 | 12792592 | 1001 | SAT1_CF | blue | na |
| chrUn | 12792624 | 12793626 | 1003 | SAT1_CF | blue | na |
| chrUn | 12793655 | 12794173 | 519  | SAT1_CF | blue | na |
| chrUn | 12794185 | 12795045 | 861  | SAT1_CF | blue | na |
| chrUn | 12795087 | 12797191 | 2105 | SAT1_CF | blue | na |
| chrUn | 12797383 | 12798168 | 786  | SAT1_CF | blue | na |
| chrUn | 12798210 | 12799133 | 924  | SAT1_CF | blue | na |
| chrUn | 12799178 | 12800134 | 957  | SAT1_CF | blue | na |
| chrUn | 12800174 | 12800676 | 503  | SAT1_CF | blue | na |
| chrUn | 12800700 | 12802472 | 1773 | SAT1_CF | blue | na |
| chrUn | 12802539 | 12803037 | 499  | SAT1_CF | blue | na |
| chrUn | 12803056 | 12804422 | 1367 | SAT1_CF | blue | na |
| chrUn | 12804465 | 12805570 | 1106 | SAT1_CF | blue | na |
| chrUn | 12805604 | 12806556 | 953  | SAT1_CF | blue | na |
| chrUn | 12806578 | 12807253 | 676  | SAT1_CF | blue | na |
| chrUn | 12807296 | 12807844 | 549  | SAT1_CF | blue | na |
| chrUn | 12807886 | 12808427 | 542  | SAT1_CF | blue | na |
| chrUn | 12808470 | 12808979 | 510  | SAT1_CF | blue | na |
| chrUn | 12809006 | 12809140 | 135  | SAT1_CF | blue | na |
| chrUn | 12809218 | 12809700 | 483  | SAT1_CF | blue | na |
| chrUn | 12809712 | 12811076 | 1365 | SAT1_CF | blue | na |
| chrUn | 12811125 | 12812419 | 1295 | SAT1_CF | blue | na |
| chrUn | 12812484 | 12813692 | 1209 | SAT1_CF | blue | na |
| chrUn | 12813757 | 12814455 | 699  | SAT1_CF | blue | na |
| chrUn | 12814468 | 12815267 | 800  | SAT1_CF | blue | na |
| chrUn | 12815290 | 12816136 | 847  | SAT1_CF | blue | na |
| chrUn | 12816172 | 12816785 | 614  | SAT1_CF | blue | na |
| chrUn | 12816799 | 12817310 | 512  | SAT1_CF | blue | na |
| chrUn | 12817330 | 12817850 | 521  | SAT1_CF | blue | na |
| chrUn | 12817863 | 12818545 | 683  | SAT1_CF | blue | na |
| chrUn | 12818560 | 12819233 | 674  | SAT1_CF | blue | na |
| chrUn | 12819276 | 12820899 | 1624 | SAT1_CF | blue | na |
| chrUn | 12820978 | 12821518 | 541  | SAT1_CF | blue | na |
| chrUn | 12821606 | 12822107 | 502  | SAT1_CF | blue | na |
| chrUn | 12822119 | 12824730 | 2612 | SAT1_CF | blue | na |
| chrUn | 12824770 | 12825270 | 501  | SAT1_CF | blue | na |

|       |          |          |              |      |    |
|-------|----------|----------|--------------|------|----|
| chrUn | 12825292 | 12827465 | 2174 SAT1_CF | blue | na |
| chrUn | 12827486 | 12828093 | 608 SAT1_CF  | blue | na |
| chrUn | 12828106 | 12828263 | 158 SAT1_CF  | blue | na |
| chrUn | 12828310 | 12828830 | 521 SAT1_CF  | blue | na |
| chrUn | 12828843 | 12829449 | 607 SAT1_CF  | blue | na |
| chrUn | 12829461 | 12830369 | 909 SAT1_CF  | blue | na |
| chrUn | 12830397 | 12830942 | 546 SAT1_CF  | blue | na |
| chrUn | 12831033 | 12831770 | 738 SAT1_CF  | blue | na |
| chrUn | 12831803 | 12832152 | 350 SAT1_CF  | blue | na |
| chrUn | 12832208 | 12832708 | 501 SAT1_CF  | blue | na |
| chrUn | 12832722 | 12833404 | 683 SAT1_CF  | blue | na |
| chrUn | 12833416 | 12834099 | 684 SAT1_CF  | blue | na |
| chrUn | 12834110 | 12834602 | 493 SAT1_CF  | blue | na |
| chrUn | 12834616 | 12835274 | 659 SAT1_CF  | blue | na |
| chrUn | 12835295 | 12835997 | 703 SAT1_CF  | blue | na |
| chrUn | 12836062 | 12836622 | 561 SAT1_CF  | blue | na |
| chrUn | 12836636 | 12837234 | 599 SAT1_CF  | blue | na |
| chrUn | 12837246 | 12837853 | 608 SAT1_CF  | blue | na |
| chrUn | 12837866 | 12838370 | 505 SAT1_CF  | blue | na |
| chrUn | 12838392 | 12839067 | 676 SAT1_CF  | blue | na |
| chrUn | 12839085 | 12839753 | 669 SAT1_CF  | blue | na |
| chrUn | 12839801 | 12840751 | 951 SAT1_CF  | blue | na |
| chrUn | 12840830 | 12841378 | 549 SAT1_CF  | blue | na |
| chrUn | 12841410 | 12841786 | 377 SAT1_CF  | blue | na |
| chrUn | 12841829 | 12842331 | 503 SAT1_CF  | blue | na |
| chrUn | 12842343 | 12843120 | 778 SAT1_CF  | blue | na |
| chrUn | 12844533 | 12845133 | 601 SAT1_CF  | blue | na |
| chrUn | 12845146 | 12845648 | 503 SAT1_CF  | blue | na |
| chrUn | 12845661 | 12846263 | 603 SAT1_CF  | blue | na |
| chrUn | 12846275 | 12846949 | 675 SAT1_CF  | blue | na |
| chrUn | 12846992 | 12848085 | 1094 SAT1_CF | blue | na |
| chrUn | 12848096 | 12848622 | 527 SAT1_CF  | blue | na |
| chrUn | 12848654 | 12849030 | 377 SAT1_CF  | blue | na |
| chrUn | 12849073 | 12849574 | 502 SAT1_CF  | blue | na |
| chrUn | 12849592 | 12850340 | 749 SAT1_CF  | blue | na |
| chrUn | 12850362 | 12851035 | 674 SAT1_CF  | blue | na |
| chrUn | 12851077 | 12851928 | 852 SAT1_CF  | blue | na |
| chrUn | 12851998 | 12852543 | 546 SAT1_CF  | blue | na |
| chrUn | 12852586 | 12853217 | 632 SAT1_CF  | blue | na |
| chrUn | 12853245 | 12853806 | 562 SAT1_CF  | blue | na |
| chrUn | 12853849 | 12854370 | 522 SAT1_CF  | blue | na |
| chrUn | 12854385 | 12855082 | 698 SAT1_CF  | blue | na |

|       |          |          |              |      |    |
|-------|----------|----------|--------------|------|----|
| chrUn | 12855102 | 12857346 | 2245 SAT1_CF | blue | na |
| chrUn | 12857389 | 12858410 | 1022 SAT1_CF | blue | na |
| chrUn | 12858497 | 12858999 | 503 SAT1_CF  | blue | na |
| chrUn | 12859011 | 12859117 | 107 SAT1_CF  | blue | na |
| chrUn | 12859141 | 12859769 | 629 SAT1_CF  | blue | na |
| chrUn | 12859793 | 12860653 | 861 SAT1_CF  | blue | na |
| chrUn | 12860671 | 12861357 | 687 SAT1_CF  | blue | na |
| chrUn | 12861369 | 12862848 | 1480 SAT1_CF | blue | na |
| chrUn | 12862890 | 12863068 | 179 SAT1_CF  | blue | na |
| chrUn | 12863093 | 12863636 | 544 SAT1_CF  | blue | na |
| chrUn | 12863650 | 12864052 | 403 SAT1_CF  | blue | na |
| chrUn | 12864111 | 12864591 | 481 SAT1_CF  | blue | na |
| chrUn | 12864604 | 12865736 | 1133 SAT1_CF | blue | na |
| chrUn | 12865769 | 12866291 | 523 SAT1_CF  | blue | na |
| chrUn | 12866348 | 12866850 | 503 SAT1_CF  | blue | na |
| chrUn | 12866863 | 12867624 | 762 SAT1_CF  | blue | na |
| chrUn | 12867648 | 12868426 | 779 SAT1_CF  | blue | na |
| chrUn | 12868454 | 12869014 | 561 SAT1_CF  | blue | na |
| chrUn | 12869057 | 12869218 | 162 SAT1_CF  | blue | na |
| chrUn | 12869304 | 12869785 | 482 SAT1_CF  | blue | na |
| chrUn | 12869798 | 12870481 | 684 SAT1_CF  | blue | na |
| chrUn | 12870493 | 12871827 | 1335 SAT1_CF | blue | na |
| chrUn | 12871871 | 12872221 | 351 SAT1_CF  | blue | na |
| chrUn | 12872265 | 12873225 | 961 SAT1_CF  | blue | na |
| chrUn | 12873265 | 12873886 | 622 SAT1_CF  | blue | na |
| chrUn | 12873910 | 12874417 | 508 SAT1_CF  | blue | na |
| chrUn | 12874432 | 12875245 | 814 SAT1_CF  | blue | na |
| chrUn | 12875297 | 12876111 | 815 SAT1_CF  | blue | na |
| chrUn | 12876140 | 12876768 | 629 SAT1_CF  | blue | na |
| chrUn | 12876803 | 12877652 | 850 SAT1_CF  | blue | na |
| chrUn | 12877670 | 12878356 | 687 SAT1_CF  | blue | na |
| chrUn | 12878368 | 12879014 | 647 SAT1_CF  | blue | na |
| chrUn | 12879047 | 12879569 | 523 SAT1_CF  | blue | na |
| chrUn | 12879584 | 12879720 | 137 SAT1_CF  | blue | na |
| chrUn | 12879786 | 12880280 | 495 SAT1_CF  | blue | na |
| chrUn | 12880300 | 12880982 | 683 SAT1_CF  | blue | na |
| chrUn | 12880995 | 12881667 | 673 SAT1_CF  | blue | na |
| chrUn | 12881764 | 12882306 | 543 SAT1_CF  | blue | na |
| chrUn | 12882350 | 12883599 | 1250 SAT1_CF | blue | na |
| chrUn | 12883611 | 12883686 | 76 SAT1_CF   | blue | na |
| chrUn | 12883742 | 12884214 | 473 SAT1_CF  | blue | na |
| chrUn | 12884227 | 12884332 | 106 SAT1_CF  | blue | na |

|       |          |          |              |      |    |
|-------|----------|----------|--------------|------|----|
| chrUn | 12884353 | 12884904 | 552 SAT1_CF  | blue | na |
| chrUn | 12884916 | 12887764 | 2849 SAT1_CF | blue | na |
| chrUn | 12887819 | 12888311 | 493 SAT1_CF  | blue | na |
| chrUn | 12888345 | 12889006 | 662 SAT1_CF  | blue | na |
| chrUn | 12889054 | 12889932 | 879 SAT1_CF  | blue | na |
| chrUn | 12889946 | 12890454 | 509 SAT1_CF  | blue | na |
| chrUn | 12890467 | 12890568 | 102 SAT1_CF  | blue | na |
| chrUn | 12890596 | 12891673 | 1078 SAT1_CF | blue | na |
| chrUn | 12891690 | 12891938 | 249 SAT1_CF  | blue | na |
| chrUn | 12892128 | 12892522 | 395 SAT1_CF  | blue | na |
| chrUn | 12892550 | 12892705 | 156 SAT1_CF  | blue | na |
| chrUn | 12892732 | 12893341 | 610 SAT1_CF  | blue | na |
| chrUn | 12893360 | 12894884 | 1525 SAT1_CF | blue | na |
| chrUn | 12894928 | 12895842 | 915 SAT1_CF  | blue | na |
| chrUn | 12895910 | 12896519 | 610 SAT1_CF  | blue | na |
| chrUn | 12896538 | 12897090 | 553 SAT1_CF  | blue | na |
| chrUn | 12897133 | 12898096 | 964 SAT1_CF  | blue | na |
| chrUn | 12898123 | 12899536 | 1414 SAT1_CF | blue | na |
| chrUn | 12899558 | 12900436 | 879 SAT1_CF  | blue | na |
| chrUn | 12900449 | 12901115 | 667 SAT1_CF  | blue | na |
| chrUn | 12901136 | 12902192 | 1057 SAT1_CF | blue | na |
| chrUn | 12902219 | 12903517 | 1299 SAT1_CF | blue | na |
| chrUn | 12903576 | 12904695 | 1120 SAT1_CF | blue | na |
| chrUn | 12904718 | 12905382 | 665 SAT1_CF  | blue | na |
| chrUn | 12905424 | 12906383 | 960 SAT1_CF  | blue | na |
| chrUn | 12906450 | 12906963 | 514 SAT1_CF  | blue | na |
| chrUn | 12906974 | 12907807 | 834 SAT1_CF  | blue | na |
| chrUn | 12907820 | 12907896 | 77 SAT1_CF   | blue | na |
| chrUn | 12907949 | 12909833 | 1885 SAT1_CF | blue | na |
| chrUn | 12909929 | 12910123 | 195 SAT1_CF  | blue | na |
| chrUn | 12910151 | 12910657 | 507 SAT1_CF  | blue | na |
| chrUn | 12910671 | 12911026 | 356 SAT1_CF  | blue | na |
| chrUn | 12911113 | 12911614 | 502 SAT1_CF  | blue | na |
| chrUn | 12911627 | 12912310 | 684 SAT1_CF  | blue | na |
| chrUn | 12912323 | 12912399 | 77 SAT1_CF   | blue | na |
| chrUn | 12912417 | 12912967 | 551 SAT1_CF  | blue | na |
| chrUn | 12912985 | 12914311 | 1327 SAT1_CF | blue | na |
| chrUn | 12914336 | 12914579 | 244 SAT1_CF  | blue | na |
| chrUn | 12914630 | 12915175 | 546 SAT1_CF  | blue | na |
| chrUn | 12915192 | 12915287 | 96 SAT1_CF   | blue | na |
| chrUn | 12915298 | 12915652 | 355 SAT1_CF  | blue | na |
| chrUn | 12915720 | 12916239 | 520 SAT1_CF  | blue | na |

|       |          |          |              |        |    |
|-------|----------|----------|--------------|--------|----|
| chrUn | 12916252 | 12917777 | 1526 SAT1_CF | blue   | na |
| chrUn | 12917791 | 12918964 | 1174 SAT1_CF | blue   | na |
| chrUn | 12918977 | 12920099 | 1123 SAT1_CF | blue   | na |
| chrUn | 12920123 | 12921122 | 1000 SAT1_CF | blue   | na |
| chrUn | 12921209 | 12921707 | 499 SAT1_CF  | blue   | na |
| chrUn | 12921720 | 12921827 | 108 SAT1_CF  | blue   | na |
| chrUn | 12921848 | 12922402 | 555 SAT1_CF  | blue   | na |
| chrUn | 12922414 | 12923097 | 684 SAT1_CF  | blue   | na |
| chrUn | 12923109 | 12923785 | 677 SAT1_CF  | blue   | na |
| chrUn | 12923828 | 12924902 | 1075 SAT1_CF | blue   | na |
| chrUn | 12924948 | 12925784 | 837 SAT1_CF  | blue   | na |
| chrUn | 12925871 | 12926366 | 496 SAT1_CF  | blue   | na |
| chrUn | 12926395 | 12927069 | 675 SAT1_CF  | blue   | na |
| chrUn | 12927081 | 12927989 | 909 SAT1_CF  | blue   | na |
| chrUn | 12928019 | 12929750 | 1732 SAT1_CF | blue   | na |
| chrUn | 12929766 | 12930444 | 679 SAT1_CF  | blue   | na |
| chrUn | 12930457 | 12930957 | 501 SAT1_CF  | blue   | na |
| chrUn | 12930969 | 12931044 | 76 SAT1_CF   | blue   | na |
| chrUn | 12931065 | 12931735 | 671 SAT1_CF  | blue   | na |
| chrUn | 12931749 | 12932266 | 518 SAT1_CF  | blue   | na |
| chrUn | 12932310 | 12933278 | 969 SAT1_CF  | blue   | na |
| chrUn | 12933359 | 12933525 | 167 SAT1_CF  | blue   | na |
| chrUn | 12933706 | 12933891 | 186 SAT1_CF  | blue   | na |
| chrUn | 12933927 | 12934427 | 501 SAT1_CF  | blue   | na |
| chrUn | 12934440 | 12935188 | 749 SAT1_CF  | blue   | na |
| chrUn | 12935201 | 12935998 | 798 SAT1_CF  | blue   | na |
| chrUn | 12939934 | 12941974 | 2041 SAT1_CF | blue   | na |
| chrUn | 12941992 | 12942915 | 924 SAT1_CF  | blue   | na |
| chrUn | 12942948 | 12944309 | 1362 SAT1_CF | blue   | na |
| chrUn | 12959085 | 12959234 | 150 Sat2CF   | purple | na |
| chrUn | 12959105 | 12960318 | 1214 Sat2CF  | purple | na |
| chrUn | 13014633 | 13014762 | 130 Sat2CF   | purple | na |
| chrUn | 13014655 | 13015468 | 814 Sat2CF   | purple | na |
| chrUn | 13015266 | 13015495 | 230 Sat2CF   | purple | na |
| chrUn | 13029543 | 13029826 | 284 Sat2CF   | purple | na |
| chrUn | 13029555 | 13029889 | 335 Sat2CF   | purple | na |
| chrUn | 13042305 | 13042490 | 186 Sat2CF   | purple | na |
| chrUn | 13042361 | 13043364 | 1004 Sat2CF  | purple | na |
| chrUn | 13066267 | 13067444 | 1178 Sat2CF  | purple | na |
| chrUn | 13066298 | 13067316 | 1019 Sat2CF  | purple | na |
| chrUn | 13095986 | 13097232 | 1247 Sat2CF  | purple | na |
| chrUn | 13112364 | 13113593 | 1230 Sat2CF  | purple | na |

|       |          |          |              |        |    |
|-------|----------|----------|--------------|--------|----|
| chrUn | 13127660 | 13128766 | 1107 Sat2CF  | purple | na |
| chrUn | 13140268 | 13140637 | 370 Sat2CF   | purple | na |
| chrUn | 13140318 | 13141116 | 799 Sat2CF   | purple | na |
| chrUn | 13181819 | 13182993 | 1175 Sat2CF  | purple | na |
| chrUn | 13213567 | 13214528 | 962 CarSat1  | red    | na |
| chrUn | 13214533 | 13214964 | 432 SAT1_CF  | blue   | na |
| chrUn | 13214987 | 13216841 | 1855 SAT1_CF | blue   | na |
| chrUn | 13216883 | 13218242 | 1360 SAT1_CF | blue   | na |
| chrUn | 13218237 | 13219118 | 882 CarSat1  | red    | na |
| chrUn | 13219150 | 13220387 | 1238 CarSat1 | red    | na |
| chrUn | 13220408 | 13221258 | 851 CarSat1  | red    | na |
| chrUn | 13221275 | 13221417 | 143 CarSat1  | red    | na |
| chrUn | 13222223 | 13222636 | 414 CarSat1  | red    | na |
| chrUn | 13224346 | 13225283 | 938 Sat2CF   | purple | na |
| chrUn | 13224487 | 13225429 | 943 Sat2CF   | purple | na |
| chrUn | 13240936 | 13241085 | 150 Sat2CF   | purple | na |
| chrUn | 13240956 | 13242149 | 1194 Sat2CF  | purple | na |
| chrUn | 13242015 | 13242177 | 163 Sat2CF   | purple | na |
| chrUn | 13285951 | 13286152 | 202 Sat2CF   | purple | na |
| chrUn | 13286044 | 13286840 | 797 Sat2CF   | purple | na |
| chrUn | 13286729 | 13286866 | 138 Sat2CF   | purple | na |
| chrUn | 13317618 | 13317766 | 149 Sat2CF   | purple | na |
| chrUn | 13317643 | 13318716 | 1074 Sat2CF  | purple | na |
| chrUn | 13318070 | 13318803 | 734 Sat2CF   | purple | na |
| chrUn | 13328910 | 13329813 | 904 Sat2CF   | purple | na |
| chrUn | 13328931 | 13329733 | 803 Sat2CF   | purple | na |
| chrUn | 13344778 | 13344957 | 180 Sat2CF   | purple | na |
| chrUn | 13344828 | 13346009 | 1182 Sat2CF  | purple | na |
| chrUn | 13361985 | 13362738 | 754 Sat2CF   | purple | na |
| chrUn | 13362008 | 13362676 | 669 Sat2CF   | purple | na |
| chrUn | 13385146 | 13386099 | 954 Sat2CF   | purple | na |
| chrUn | 13385226 | 13385964 | 739 Sat2CF   | purple | na |
| chrUn | 13385226 | 13385964 | 739 Sat2CF   | purple | na |
| chrUn | 13385146 | 13386099 | 954 Sat2CF   | purple | na |
| chrUn | 13404109 | 13405244 | 1136 Sat2CF  | purple | na |
| chrUn | 13425234 | 13426028 | 795 Sat2CF   | purple | na |
| chrUn | 13453171 | 13454181 | 1011 Sat2CF  | purple | na |
| chrUn | 13453282 | 13454321 | 1040 Sat2CF  | purple | na |
| chrUn | 13478597 | 13479304 | 708 CarSat1  | red    | na |
| chrUn | 13479453 | 13480905 | 1453 CarSat1 | red    | na |
| chrUn | 13480926 | 13481703 | 778 CarSat1  | red    | na |
| chrUn | 13481726 | 13482442 | 717 CarSat1  | red    | na |



|       |          |          |      |         |        |    |
|-------|----------|----------|------|---------|--------|----|
| chrUn | 13482460 | 13483994 | 1535 | CarSat1 | red    | na |
| chrUn | 13484015 | 13485254 | 1240 | CarSat1 | red    | na |
| chrUn | 13485257 | 13487053 | 1797 | SAT1_CF | blue   | na |
| chrUn | 13490731 | 13491690 | 960  | Sat2CF  | purple | na |
| chrUn | 13490794 | 13491647 | 854  | Sat2CF  | purple | na |
| chrUn | 13491882 | 13492757 | 876  | SAT1_CF | blue   | na |
| chrUn | 13492750 | 13493472 | 723  | CarSat1 | red    | na |
| chrUn | 13493506 | 13493636 | 131  | CarSat1 | red    | na |
| chrUn | 13495006 | 13495645 | 640  | SAT1_CF | blue   | na |
| chrUn | 13495661 | 13496223 | 563  | SAT1_CF | blue   | na |
| chrUn | 13496266 | 13497524 | 1259 | SAT1_CF | blue   | na |
| chrUn | 13497603 | 13498127 | 525  | SAT1_CF | blue   | na |
| chrUn | 13498142 | 13498771 | 630  | SAT1_CF | blue   | na |
| chrUn | 13498783 | 13499456 | 674  | SAT1_CF | blue   | na |
| chrUn | 13499499 | 13503584 | 4086 | SAT1_CF | blue   | na |
| chrUn | 13503627 | 13505252 | 1626 | SAT1_CF | blue   | na |
| chrUn | 13505295 | 13505666 | 372  | SAT1_CF | blue   | na |
| chrUn | 13505724 | 13506202 | 479  | SAT1_CF | blue   | na |
| chrUn | 13506214 | 13506890 | 677  | SAT1_CF | blue   | na |
| chrUn | 13506933 | 13507496 | 564  | SAT1_CF | blue   | na |
| chrUn | 13507507 | 13508187 | 681  | SAT1_CF | blue   | na |
| chrUn | 13508199 | 13508876 | 678  | SAT1_CF | blue   | na |
| chrUn | 13508923 | 13509041 | 119  | SAT1_CF | blue   | na |
| chrUn | 13509083 | 13510902 | 1820 | SAT1_CF | blue   | na |
| chrUn | 13510961 | 13511443 | 483  | SAT1_CF | blue   | na |
| chrUn | 13511470 | 13512134 | 665  | SAT1_CF | blue   | na |
| chrUn | 13512146 | 13512829 | 684  | SAT1_CF | blue   | na |
| chrUn | 13512841 | 13513725 | 885  | SAT1_CF | blue   | na |
| chrUn | 13513747 | 13514596 | 850  | SAT1_CF | blue   | na |
| chrUn | 13514609 | 13515293 | 685  | SAT1_CF | blue   | na |
| chrUn | 13515321 | 13515979 | 659  | SAT1_CF | blue   | na |
| chrUn | 13516022 | 13516561 | 540  | SAT1_CF | blue   | na |
| chrUn | 13516593 | 13517649 | 1057 | SAT1_CF | blue   | na |
| chrUn | 13517662 | 13518495 | 834  | SAT1_CF | blue   | na |
| chrUn | 13518521 | 13519263 | 743  | SAT1_CF | blue   | na |
| chrUn | 13519333 | 13520779 | 1447 | SAT1_CF | blue   | na |
| chrUn | 13520798 | 13521940 | 1143 | SAT1_CF | blue   | na |
| chrUn | 13521961 | 13522479 | 519  | SAT1_CF | blue   | na |
| chrUn | 13522501 | 13523097 | 597  | SAT1_CF | blue   | na |
| chrUn | 13523119 | 13523792 | 674  | SAT1_CF | blue   | na |
| chrUn | 13523810 | 13524479 | 670  | SAT1_CF | blue   | na |
| chrUn | 13524522 | 13526553 | 2032 | SAT1_CF | blue   | na |

|       |          |          |              |      |    |
|-------|----------|----------|--------------|------|----|
| chrUn | 13526612 | 13527094 | 483 SAT1_CF  | blue | na |
| chrUn | 13527121 | 13527791 | 671 SAT1_CF  | blue | na |
| chrUn | 13527803 | 13528657 | 855 SAT1_CF  | blue | na |
| chrUn | 13528707 | 13529480 | 774 SAT1_CF  | blue | na |
| chrUn | 13529524 | 13530071 | 548 SAT1_CF  | blue | na |
| chrUn | 13530136 | 13530272 | 137 SAT1_CF  | blue | na |
| chrUn | 13530319 | 13530839 | 521 SAT1_CF  | blue | na |
| chrUn | 13530852 | 13530960 | 109 SAT1_CF  | blue | na |
| chrUn | 13530981 | 13531526 | 546 SAT1_CF  | blue | na |
| chrUn | 13531569 | 13533158 | 1590 SAT1_CF | blue | na |
| chrUn | 13533169 | 13533540 | 372 SAT1_CF  | blue | na |
| chrUn | 13533597 | 13534096 | 500 SAT1_CF  | blue | na |
| chrUn | 13534123 | 13534793 | 671 SAT1_CF  | blue | na |
| chrUn | 13534805 | 13535480 | 676 SAT1_CF  | blue | na |
| chrUn | 13535522 | 13536563 | 1042 SAT1_CF | blue | na |
| chrUn | 13536606 | 13536979 | 374 SAT1_CF  | blue | na |
| chrUn | 13537034 | 13537651 | 618 SAT1_CF  | blue | na |
| chrUn | 13537977 | 13541334 | 3358 SAT1_CF | blue | na |
| chrUn | 13541347 | 13541453 | 107 SAT1_CF  | blue | na |
| chrUn | 13541476 | 13542099 | 624 SAT1_CF  | blue | na |
| chrUn | 13542112 | 13544414 | 2303 SAT1_CF | blue | na |
| chrUn | 13544428 | 13545263 | 836 SAT1_CF  | blue | na |
| chrUn | 13545276 | 13545382 | 107 SAT1_CF  | blue | na |
| chrUn | 13545405 | 13546029 | 625 SAT1_CF  | blue | na |
| chrUn | 13546042 | 13548719 | 2678 SAT1_CF | blue | na |
| chrUn | 13548806 | 13549307 | 502 SAT1_CF  | blue | na |
| chrUn | 13549320 | 13549996 | 677 SAT1_CF  | blue | na |
| chrUn | 13550010 | 13550870 | 861 SAT1_CF  | blue | na |
| chrUn | 13550912 | 13551460 | 549 SAT1_CF  | blue | na |
| chrUn | 13551473 | 13552427 | 955 SAT1_CF  | blue | na |
| chrUn | 13552506 | 13553054 | 549 SAT1_CF  | blue | na |
| chrUn | 13553071 | 13553464 | 394 SAT1_CF  | blue | na |
| chrUn | 13553504 | 13554006 | 503 SAT1_CF  | blue | na |
| chrUn | 13554028 | 13554708 | 681 SAT1_CF  | blue | na |
| chrUn | 13554751 | 13556375 | 1625 SAT1_CF | blue | na |
| chrUn | 13556418 | 13556791 | 374 SAT1_CF  | blue | na |
| chrUn | 13556827 | 13557329 | 503 SAT1_CF  | blue | na |
| chrUn | 13557341 | 13557450 | 110 SAT1_CF  | blue | na |
| chrUn | 13557471 | 13558584 | 1114 SAT1_CF | blue | na |
| chrUn | 13558631 | 13559177 | 547 SAT1_CF  | blue | na |
| chrUn | 13559190 | 13559557 | 368 SAT1_CF  | blue | na |
| chrUn | 13559576 | 13560097 | 522 SAT1_CF  | blue | na |

|       |          |          |              |      |    |
|-------|----------|----------|--------------|------|----|
| chrUn | 13560115 | 13560224 | 110 SAT1_CF  | blue | na |
| chrUn | 13560238 | 13560756 | 519 SAT1_CF  | blue | na |
| chrUn | 13560776 | 13562329 | 1554 SAT1_CF | blue | na |
| chrUn | 13562365 | 13562867 | 503 SAT1_CF  | blue | na |
| chrUn | 13562880 | 13562987 | 108 SAT1_CF  | blue | na |
| chrUn | 13563009 | 13563559 | 551 SAT1_CF  | blue | na |
| chrUn | 13563638 | 13564163 | 526 SAT1_CF  | blue | na |
| chrUn | 13564178 | 13564873 | 696 SAT1_CF  | blue | na |
| chrUn | 13564907 | 13565652 | 746 SAT1_CF  | blue | na |
| chrUn | 13565664 | 13566519 | 856 SAT1_CF  | blue | na |
| chrUn | 13566532 | 13568424 | 1893 SAT1_CF | blue | na |
| chrUn | 13568464 | 13568965 | 502 SAT1_CF  | blue | na |
| chrUn | 13568978 | 13570198 | 1221 SAT1_CF | blue | na |
| chrUn | 13570241 | 13571629 | 1389 SAT1_CF | blue | na |
| chrUn | 13571672 | 13572098 | 427 SAT1_CF  | blue | na |
| chrUn | 13572111 | 13572653 | 543 SAT1_CF  | blue | na |
| chrUn | 13572665 | 13573350 | 686 SAT1_CF  | blue | na |
| chrUn | 13573362 | 13574046 | 685 SAT1_CF  | blue | na |
| chrUn | 13574059 | 13574898 | 840 SAT1_CF  | blue | na |
| chrUn | 13574911 | 13576100 | 1190 SAT1_CF | blue | na |
| chrUn | 13576143 | 13576633 | 491 SAT1_CF  | blue | na |
| chrUn | 13576677 | 13577468 | 792 SAT1_CF  | blue | na |
| chrUn | 13577648 | 13577829 | 182 SAT1_CF  | blue | na |
| chrUn | 13577888 | 13578363 | 476 SAT1_CF  | blue | na |
| chrUn | 13578396 | 13580398 | 2003 SAT1_CF | blue | na |
| chrUn | 13580478 | 13581001 | 524 SAT1_CF  | blue | na |
| chrUn | 13581016 | 13581145 | 130 SAT1_CF  | blue | na |
| chrUn | 13581217 | 13581719 | 503 SAT1_CF  | blue | na |
| chrUn | 13581732 | 13582494 | 763 SAT1_CF  | blue | na |
| chrUn | 13582507 | 13583173 | 667 SAT1_CF  | blue | na |
| chrUn | 13583271 | 13583536 | 266 SAT1_CF  | blue | na |
| chrUn | 13583563 | 13585312 | 1750 SAT1_CF | blue | na |
| chrUn | 13585324 | 13586806 | 1483 SAT1_CF | blue | na |
| chrUn | 13586831 | 13587753 | 923 SAT1_CF  | blue | na |
| chrUn | 13587774 | 13588294 | 521 SAT1_CF  | blue | na |
| chrUn | 13588307 | 13588415 | 109 SAT1_CF  | blue | na |
| chrUn | 13588436 | 13588981 | 546 SAT1_CF  | blue | na |
| chrUn | 13589024 | 13589985 | 962 SAT1_CF  | blue | na |
| chrUn | 13590064 | 13591022 | 959 SAT1_CF  | blue | na |
| chrUn | 13591062 | 13591564 | 503 SAT1_CF  | blue | na |
| chrUn | 13591577 | 13592244 | 668 SAT1_CF  | blue | na |
| chrUn | 13592297 | 13592840 | 544 SAT1_CF  | blue | na |

|       |          |          |              |      |    |
|-------|----------|----------|--------------|------|----|
| chrUn | 13592910 | 13594067 | 1158 SAT1_CF | blue | na |
| chrUn | 13594085 | 13594195 | 111 SAT1_CF  | blue | na |
| chrUn | 13594208 | 13594759 | 552 SAT1_CF  | blue | na |
| chrUn | 13594773 | 13597682 | 2910 SAT1_CF | blue | na |
| chrUn | 13597694 | 13597866 | 173 SAT1_CF  | blue | na |
| chrUn | 13597908 | 13599342 | 1435 SAT1_CF | blue | na |
| chrUn | 13599359 | 13599920 | 562 SAT1_CF  | blue | na |
| chrUn | 13599947 | 13600650 | 704 SAT1_CF  | blue | na |
| chrUn | 13600662 | 13601996 | 1335 SAT1_CF | blue | na |
| chrUn | 13602021 | 13602346 | 326 SAT1_CF  | blue | na |
| chrUn | 13602424 | 13602973 | 550 SAT1_CF  | blue | na |
| chrUn | 13603004 | 13603850 | 847 SAT1_CF  | blue | na |
| chrUn | 13603862 | 13603974 | 113 SAT1_CF  | blue | na |
| chrUn | 13603991 | 13604718 | 728 SAT1_CF  | blue | na |
| chrUn | 13604771 | 13606205 | 1435 SAT1_CF | blue | na |
| chrUn | 13606249 | 13606962 | 714 SAT1_CF  | blue | na |
| chrUn | 13606978 | 13608769 | 1792 SAT1_CF | blue | na |
| chrUn | 13608788 | 13610261 | 1474 SAT1_CF | blue | na |
| chrUn | 13610304 | 13611376 | 1073 SAT1_CF | blue | na |
| chrUn | 13611412 | 13612206 | 795 SAT1_CF  | blue | na |
| chrUn | 13613056 | 13613458 | 403 SAT1_CF  | blue | na |
| chrUn | 13613478 | 13614850 | 1373 SAT1_CF | blue | na |
| chrUn | 13614911 | 13617035 | 2125 SAT1_CF | blue | na |
| chrUn | 13617113 | 13617657 | 545 SAT1_CF  | blue | na |
| chrUn | 13617670 | 13617777 | 108 SAT1_CF  | blue | na |
| chrUn | 13617799 | 13618422 | 624 SAT1_CF  | blue | na |
| chrUn | 13618451 | 13619143 | 693 SAT1_CF  | blue | na |
| chrUn | 13619154 | 13619694 | 541 SAT1_CF  | blue | na |
| chrUn | 13619709 | 13620390 | 682 SAT1_CF  | blue | na |
| chrUn | 13620402 | 13621082 | 681 SAT1_CF  | blue | na |
| chrUn | 13621093 | 13621695 | 603 SAT1_CF  | blue | na |
| chrUn | 13621707 | 13623636 | 1930 SAT1_CF | blue | na |
| chrUn | 13623648 | 13624497 | 850 SAT1_CF  | blue | na |
| chrUn | 13624510 | 13626402 | 1893 SAT1_CF | blue | na |
| chrUn | 13626442 | 13626943 | 502 SAT1_CF  | blue | na |
| chrUn | 13626970 | 13627716 | 747 SAT1_CF  | blue | na |
| chrUn | 13627733 | 13628347 | 615 SAT1_CF  | blue | na |
| chrUn | 13628359 | 13629035 | 677 SAT1_CF  | blue | na |
| chrUn | 13629078 | 13630515 | 1438 SAT1_CF | blue | na |
| chrUn | 13630581 | 13631437 | 857 SAT1_CF  | blue | na |
| chrUn | 13631636 | 13632396 | 761 SAT1_CF  | blue | na |
| chrUn | 13632436 | 13632937 | 502 SAT1_CF  | blue | na |

|       |          |          |              |      |    |
|-------|----------|----------|--------------|------|----|
| chrUn | 13632950 | 13633553 | 604 SAT1_CF  | blue | na |
| chrUn | 13633565 | 13634419 | 855 SAT1_CF  | blue | na |
| chrUn | 13634432 | 13634941 | 510 SAT1_CF  | blue | na |
| chrUn | 13635103 | 13636260 | 1158 SAT1_CF | blue | na |
| chrUn | 13636304 | 13636847 | 544 SAT1_CF  | blue | na |
| chrUn | 13636861 | 13637215 | 355 SAT1_CF  | blue | na |
| chrUn | 13637302 | 13637803 | 502 SAT1_CF  | blue | na |
| chrUn | 13637824 | 13640921 | 3098 SAT1_CF | blue | na |
| chrUn | 13640965 | 13641514 | 550 SAT1_CF  | blue | na |
| chrUn | 13641557 | 13642187 | 631 SAT1_CF  | blue | na |
| chrUn | 13642214 | 13642777 | 564 SAT1_CF  | blue | na |
| chrUn | 13642857 | 13644431 | 1575 SAT1_CF | blue | na |
| chrUn | 13644443 | 13646231 | 1789 SAT1_CF | blue | na |
| chrUn | 13646311 | 13646476 | 166 SAT1_CF  | blue | na |
| chrUn | 13646657 | 13646842 | 186 SAT1_CF  | blue | na |
| chrUn | 13646859 | 13647378 | 520 SAT1_CF  | blue | na |
| chrUn | 13647391 | 13647496 | 106 SAT1_CF  | blue | na |
| chrUn | 13647519 | 13649214 | 1696 SAT1_CF | blue | na |
| chrUn | 13649227 | 13649332 | 106 SAT1_CF  | blue | na |
| chrUn | 13649355 | 13649986 | 632 SAT1_CF  | blue | na |
| chrUn | 13649998 | 13650681 | 684 SAT1_CF  | blue | na |
| chrUn | 13650693 | 13650765 | 73 SAT1_CF   | blue | na |
| chrUn | 13650791 | 13651584 | 794 SAT1_CF  | blue | na |
| chrUn | 13651597 | 13652243 | 647 SAT1_CF  | blue | na |
| chrUn | 13652255 | 13653752 | 1498 SAT1_CF | blue | na |
| chrUn | 13653838 | 13654333 | 496 SAT1_CF  | blue | na |
| chrUn | 13654353 | 13655034 | 682 SAT1_CF  | blue | na |
| chrUn | 13655048 | 13655157 | 110 SAT1_CF  | blue | na |
| chrUn | 13655178 | 13655905 | 728 SAT1_CF  | blue | na |
| chrUn | 13655947 | 13656491 | 545 SAT1_CF  | blue | na |
| chrUn | 13656506 | 13657392 | 887 SAT1_CF  | blue | na |
| chrUn | 13657435 | 13657802 | 368 SAT1_CF  | blue | na |
| chrUn | 13657862 | 13658344 | 483 SAT1_CF  | blue | na |
| chrUn | 13658357 | 13659032 | 676 SAT1_CF  | blue | na |
| chrUn | 13659077 | 13660149 | 1073 SAT1_CF | blue | na |
| chrUn | 13660181 | 13660700 | 520 SAT1_CF  | blue | na |
| chrUn | 13660713 | 13661115 | 403 SAT1_CF  | blue | na |
| chrUn | 13661155 | 13661656 | 502 SAT1_CF  | blue | na |
| chrUn | 13661669 | 13661777 | 109 SAT1_CF  | blue | na |
| chrUn | 13661798 | 13662587 | 790 SAT1_CF  | blue | na |
| chrUn | 13662657 | 13663410 | 754 SAT1_CF  | blue | na |
| chrUn | 13663488 | 13663967 | 480 SAT1_CF  | blue | na |

|       |          |          |              |      |    |
|-------|----------|----------|--------------|------|----|
| chrUn | 13663998 | 13665613 | 1616 SAT1_CF | blue | na |
| chrUn | 13665670 | 13666626 | 957 SAT1_CF  | blue | na |
| chrUn | 13666668 | 13667167 | 500 SAT1_CF  | blue | na |
| chrUn | 13667180 | 13668552 | 1373 SAT1_CF | blue | na |
| chrUn | 13668595 | 13669585 | 991 SAT1_CF  | blue | na |
| chrUn | 13669607 | 13670151 | 545 SAT1_CF  | blue | na |
| chrUn | 13670162 | 13670396 | 235 SAT1_CF  | blue | na |
| chrUn | 13670576 | 13670743 | 168 SAT1_CF  | blue | na |
| chrUn | 13670817 | 13671288 | 472 SAT1_CF  | blue | na |
| chrUn | 13671311 | 13672634 | 1324 SAT1_CF | blue | na |
| chrUn | 13672649 | 13672806 | 158 SAT1_CF  | blue | na |
| chrUn | 13672832 | 13674226 | 1395 SAT1_CF | blue | na |
| chrUn | 13674304 | 13675749 | 1446 SAT1_CF | blue | na |
| chrUn | 13675830 | 13675996 | 167 SAT1_CF  | blue | na |
| chrUn | 13676177 | 13676361 | 185 SAT1_CF  | blue | na |
| chrUn | 13676397 | 13676894 | 498 SAT1_CF  | blue | na |
| chrUn | 13676907 | 13677008 | 102 SAT1_CF  | blue | na |
| chrUn | 13677036 | 13678068 | 1033 SAT1_CF | blue | na |
| chrUn | 13678108 | 13678606 | 499 SAT1_CF  | blue | na |
| chrUn | 13678618 | 13679952 | 1335 SAT1_CF | blue | na |
| chrUn | 13679996 | 13680137 | 142 SAT1_CF  | blue | na |
| chrUn | 13680381 | 13681329 | 949 SAT1_CF  | blue | na |
| chrUn | 13681342 | 13682464 | 1123 SAT1_CF | blue | na |
| chrUn | 13682488 | 13683493 | 1006 SAT1_CF | blue | na |
| chrUn | 13683579 | 13684081 | 503 SAT1_CF  | blue | na |
| chrUn | 13684094 | 13685428 | 1335 SAT1_CF | blue | na |
| chrUn | 13685474 | 13685810 | 337 SAT1_CF  | blue | na |
| chrUn | 13685854 | 13686738 | 885 SAT1_CF  | blue | na |
| chrUn | 13686759 | 13687280 | 522 SAT1_CF  | blue | na |
| chrUn | 13687293 | 13687401 | 109 SAT1_CF  | blue | na |
| chrUn | 13687422 | 13687977 | 556 SAT1_CF  | blue | na |
| chrUn | 13687989 | 13688664 | 676 SAT1_CF  | blue | na |
| chrUn | 13688761 | 13689303 | 543 SAT1_CF  | blue | na |
| chrUn | 13689347 | 13690320 | 974 SAT1_CF  | blue | na |
| chrUn | 13690331 | 13692045 | 1715 SAT1_CF | blue | na |
| chrUn | 13692089 | 13692962 | 874 SAT1_CF  | blue | na |
| chrUn | 13694370 | 13694946 | 577 SAT1_CF  | blue | na |
| chrUn | 13695006 | 13695480 | 475 SAT1_CF  | blue | na |
| chrUn | 13695500 | 13696395 | 896 SAT1_CF  | blue | na |
| chrUn | 13696412 | 13697870 | 1459 SAT1_CF | blue | na |
| chrUn | 13697883 | 13699656 | 1774 SAT1_CF | blue | na |
| chrUn | 13699743 | 13700245 | 503 SAT1_CF  | blue | na |

|       |          |          |              |      |    |
|-------|----------|----------|--------------|------|----|
| chrUn | 13700272 | 13700362 | 91 SAT1_CF   | blue | na |
| chrUn | 13700386 | 13701639 | 1254 SAT1_CF | blue | na |
| chrUn | 13701663 | 13702258 | 596 SAT1_CF  | blue | na |
| chrUn | 13702270 | 13703178 | 909 SAT1_CF  | blue | na |
| chrUn | 13703208 | 13704831 | 1624 SAT1_CF | blue | na |
| chrUn | 13704910 | 13705458 | 549 SAT1_CF  | blue | na |
| chrUn | 13705470 | 13705579 | 110 SAT1_CF  | blue | na |
| chrUn | 13705600 | 13707308 | 1709 SAT1_CF | blue | na |
| chrUn | 13707353 | 13707854 | 502 SAT1_CF  | blue | na |
| chrUn | 13707881 | 13708546 | 666 SAT1_CF  | blue | na |
| chrUn | 13708570 | 13709418 | 849 SAT1_CF  | blue | na |
| chrUn | 13709460 | 13710002 | 543 SAT1_CF  | blue | na |
| chrUn | 13710067 | 13711910 | 1844 SAT1_CF | blue | na |
| chrUn | 13711958 | 13712916 | 959 SAT1_CF  | blue | na |
| chrUn | 13712995 | 13713908 | 914 SAT1_CF  | blue | na |
| chrUn | 13713995 | 13714496 | 502 SAT1_CF  | blue | na |
| chrUn | 13714515 | 13714618 | 104 SAT1_CF  | blue | na |
| chrUn | 13714639 | 13715182 | 544 SAT1_CF  | blue | na |
| chrUn | 13715225 | 13716852 | 1628 SAT1_CF | blue | na |
| chrUn | 13716863 | 13717249 | 387 SAT1_CF  | blue | na |
| chrUn | 13717302 | 13717802 | 501 SAT1_CF  | blue | na |
| chrUn | 13717844 | 13718157 | 314 SAT1_CF  | blue | na |
| chrUn | 13718199 | 13718844 | 646 SAT1_CF  | blue | na |
| chrUn | 13718893 | 13719487 | 595 SAT1_CF  | blue | na |
| chrUn | 13720884 | 13721457 | 574 SAT1_CF  | blue | na |
| chrUn | 13721497 | 13721991 | 495 SAT1_CF  | blue | na |
| chrUn | 13722011 | 13722693 | 683 SAT1_CF  | blue | na |
| chrUn | 13722716 | 13723382 | 667 SAT1_CF  | blue | na |
| chrUn | 13723425 | 13724054 | 630 SAT1_CF  | blue | na |
| chrUn | 13724082 | 13725461 | 1380 SAT1_CF | blue | na |
| chrUn | 13725505 | 13726007 | 503 SAT1_CF  | blue | na |
| chrUn | 13726029 | 13727311 | 1283 SAT1_CF | blue | na |
| chrUn | 13727325 | 13729038 | 1714 SAT1_CF | blue | na |
| chrUn | 13729080 | 13730115 | 1036 SAT1_CF | blue | na |
| chrUn | 13730162 | 13730837 | 676 SAT1_CF  | blue | na |
| chrUn | 13730933 | 13731451 | 519 SAT1_CF  | blue | na |
| chrUn | 13731483 | 13732009 | 527 SAT1_CF  | blue | na |
| chrUn | 13732053 | 13733461 | 1409 SAT1_CF | blue | na |
| chrUn | 13733486 | 13735352 | 1867 SAT1_CF | blue | na |
| chrUn | 13735396 | 13736330 | 935 SAT1_CF  | blue | na |
| chrUn | 13736371 | 13737029 | 659 SAT1_CF  | blue | na |
| chrUn | 13737073 | 13737850 | 778 SAT1_CF  | blue | na |

|       |          |          |              |      |    |
|-------|----------|----------|--------------|------|----|
| chrUn | 13737967 | 13738891 | 925 SAT1_CF  | blue | na |
| chrUn | 13738929 | 13739431 | 503 SAT1_CF  | blue | na |
| chrUn | 13739449 | 13740048 | 600 SAT1_CF  | blue | na |
| chrUn | 13740087 | 13741536 | 1450 SAT1_CF | blue | na |
| chrUn | 13741579 | 13741918 | 340 SAT1_CF  | blue | na |
| chrUn | 13741944 | 13743281 | 1338 SAT1_CF | blue | na |
| chrUn | 13743322 | 13743691 | 370 SAT1_CF  | blue | na |
| chrUn | 13743731 | 13744232 | 502 SAT1_CF  | blue | na |
| chrUn | 13744249 | 13746351 | 2103 SAT1_CF | blue | na |
| chrUn | 13746432 | 13746995 | 564 SAT1_CF  | blue | na |
| chrUn | 13747045 | 13747562 | 518 SAT1_CF  | blue | na |
| chrUn | 13747577 | 13747713 | 137 SAT1_CF  | blue | na |
| chrUn | 13747779 | 13749623 | 1845 SAT1_CF | blue | na |
| chrUn | 13749669 | 13750229 | 561 SAT1_CF  | blue | na |
| chrUn | 13750313 | 13750860 | 548 SAT1_CF  | blue | na |
| chrUn | 13750888 | 13751024 | 137 SAT1_CF  | blue | na |
| chrUn | 13751090 | 13751591 | 502 SAT1_CF  | blue | na |
| chrUn | 13751617 | 13752378 | 762 SAT1_CF  | blue | na |
| chrUn | 13752420 | 13754663 | 2244 SAT1_CF | blue | na |
| chrUn | 13754694 | 13755202 | 509 SAT1_CF  | blue | na |
| chrUn | 13755215 | 13755570 | 356 SAT1_CF  | blue | na |
| chrUn | 13755686 | 13756206 | 521 SAT1_CF  | blue | na |
| chrUn | 13756237 | 13756763 | 527 SAT1_CF  | blue | na |
| chrUn | 13756807 | 13758699 | 1893 SAT1_CF | blue | na |
| chrUn | 13758739 | 13759240 | 502 SAT1_CF  | blue | na |
| chrUn | 13759267 | 13760236 | 970 SAT1_CF  | blue | na |
| chrUn | 13760250 | 13760774 | 525 SAT1_CF  | blue | na |
| chrUn | 13760816 | 13761892 | 1077 SAT1_CF | blue | na |
| chrUn | 13761935 | 13762482 | 548 SAT1_CF  | blue | na |
| chrUn | 13762510 | 13762646 | 137 SAT1_CF  | blue | na |
| chrUn | 13762711 | 13763212 | 502 SAT1_CF  | blue | na |
| chrUn | 13763238 | 13763908 | 671 SAT1_CF  | blue | na |
| chrUn | 13763920 | 13764593 | 674 SAT1_CF  | blue | na |
| chrUn | 13764653 | 13765531 | 879 SAT1_CF  | blue | na |
| chrUn | 13765548 | 13767749 | 2202 SAT1_CF | blue | na |
| chrUn | 13767762 | 13768113 | 352 SAT1_CF  | blue | na |
| chrUn | 13768166 | 13768665 | 500 SAT1_CF  | blue | na |
| chrUn | 13768683 | 13769748 | 1066 SAT1_CF | blue | na |
| chrUn | 13769776 | 13770254 | 479 SAT1_CF  | blue | na |
| chrUn | 13770281 | 13772817 | 2537 SAT1_CF | blue | na |
| chrUn | 13772851 | 13773774 | 924 SAT1_CF  | blue | na |
| chrUn | 13773814 | 13774315 | 502 SAT1_CF  | blue | na |



|       |          |          |              |      |    |
|-------|----------|----------|--------------|------|----|
| chrUn | 13774329 | 13775010 | 682 SAT1_CF  | blue | na |
| chrUn | 13775022 | 13775694 | 673 SAT1_CF  | blue | na |
| chrUn | 13775737 | 13777731 | 1995 SAT1_CF | blue | na |
| chrUn | 13777799 | 13778320 | 522 SAT1_CF  | blue | na |
| chrUn | 13778333 | 13779014 | 682 SAT1_CF  | blue | na |
| chrUn | 13779026 | 13783550 | 4525 SAT1_CF | blue | na |
| chrUn | 13783607 | 13784081 | 475 SAT1_CF  | blue | na |
| chrUn | 13784108 | 13784698 | 591 SAT1_CF  | blue | na |
| chrUn | 13784712 | 13786058 | 1347 SAT1_CF | blue | na |
| chrUn | 13786178 | 13787331 | 1154 SAT1_CF | blue | na |
| chrUn | 13787342 | 13787410 | 69 SAT1_CF   | blue | na |
| chrUn | 13787479 | 13789175 | 1697 SAT1_CF | blue | na |
| chrUn | 13789189 | 13789864 | 676 SAT1_CF  | blue | na |
| chrUn | 13789943 | 13790450 | 508 SAT1_CF  | blue | na |
| chrUn | 13790482 | 13790639 | 158 SAT1_CF  | blue | na |
| chrUn | 13790684 | 13792005 | 1322 SAT1_CF | blue | na |
| chrUn | 13792070 | 13792625 | 556 SAT1_CF  | blue | na |
| chrUn | 13792637 | 13793314 | 678 SAT1_CF  | blue | na |
| chrUn | 13793327 | 13793972 | 646 SAT1_CF  | blue | na |
| chrUn | 13794016 | 13795827 | 1812 SAT1_CF | blue | na |
| chrUn | 13795840 | 13795946 | 107 SAT1_CF  | blue | na |
| chrUn | 13795969 | 13796543 | 575 SAT1_CF  | blue | na |
| chrUn | 13796554 | 13797202 | 649 SAT1_CF  | blue | na |
| chrUn | 13797214 | 13797336 | 123 SAT1_CF  | blue | na |
| chrUn | 13797347 | 13797884 | 538 SAT1_CF  | blue | na |
| chrUn | 13797926 | 13799148 | 1223 SAT1_CF | blue | na |
| chrUn | 13799227 | 13799738 | 512 SAT1_CF  | blue | na |
| chrUn | 13799766 | 13799922 | 157 SAT1_CF  | blue | na |
| chrUn | 13799967 | 13800557 | 591 SAT1_CF  | blue | na |
| chrUn | 13800576 | 13801129 | 554 SAT1_CF  | blue | na |
| chrUn | 13801172 | 13802133 | 962 SAT1_CF  | blue | na |
| chrUn | 13802160 | 13803572 | 1413 SAT1_CF | blue | na |
| chrUn | 13803596 | 13804914 | 1319 SAT1_CF | blue | na |
| chrUn | 13805009 | 13805260 | 252 SAT1_CF  | blue | na |
| chrUn | 13805339 | 13806297 | 959 SAT1_CF  | blue | na |
| chrUn | 13806357 | 13806839 | 483 SAT1_CF  | blue | na |
| chrUn | 13806851 | 13807535 | 685 SAT1_CF  | blue | na |
| chrUn | 13807557 | 13808399 | 843 SAT1_CF  | blue | na |
| chrUn | 13808449 | 13808993 | 545 SAT1_CF  | blue | na |
| chrUn | 13809037 | 13809561 | 525 SAT1_CF  | blue | na |
| chrUn | 13809604 | 13810157 | 554 SAT1_CF  | blue | na |
| chrUn | 13810169 | 13810842 | 674 SAT1_CF  | blue | na |

|       |          |          |              |      |    |
|-------|----------|----------|--------------|------|----|
| chrUn | 13810912 | 13811510 | 599 SAT1_CF  | blue | na |
| chrUn | 13811533 | 13812045 | 513 SAT1_CF  | blue | na |
| chrUn | 13812132 | 13812633 | 502 SAT1_CF  | blue | na |
| chrUn | 13812651 | 13814034 | 1384 SAT1_CF | blue | na |
| chrUn | 13814046 | 13814906 | 861 SAT1_CF  | blue | na |
| chrUn | 13814949 | 13815739 | 791 SAT1_CF  | blue | na |
| chrUn | 13815783 | 13816324 | 542 SAT1_CF  | blue | na |
| chrUn | 13816349 | 13817021 | 673 SAT1_CF  | blue | na |
| chrUn | 13817033 | 13817706 | 674 SAT1_CF  | blue | na |
| chrUn | 13817721 | 13818365 | 645 SAT1_CF  | blue | na |
| chrUn | 13818409 | 13818714 | 306 SAT1_CF  | blue | na |
| chrUn | 13818728 | 13818822 | 95 SAT1_CF   | blue | na |
| chrUn | 13818855 | 13819529 | 675 SAT1_CF  | blue | na |
| chrUn | 13819555 | 13820075 | 521 SAT1_CF  | blue | na |
| chrUn | 13820088 | 13820767 | 680 SAT1_CF  | blue | na |
| chrUn | 13820791 | 13822217 | 1427 SAT1_CF | blue | na |
| chrUn | 13822289 | 13822849 | 561 SAT1_CF  | blue | na |
| chrUn | 13822891 | 13823443 | 553 SAT1_CF  | blue | na |
| chrUn | 13823456 | 13824130 | 675 SAT1_CF  | blue | na |
| chrUn | 13824173 | 13825996 | 1824 SAT1_CF | blue | na |
| chrUn | 13826035 | 13826534 | 500 SAT1_CF  | blue | na |
| chrUn | 13826547 | 13827152 | 606 SAT1_CF  | blue | na |
| chrUn | 13827164 | 13827843 | 680 SAT1_CF  | blue | na |
| chrUn | 13827855 | 13829078 | 1224 SAT1_CF | blue | na |
| chrUn | 13829128 | 13829447 | 320 SAT1_CF  | blue | na |
| chrUn | 13829458 | 13830106 | 649 SAT1_CF  | blue | na |
| chrUn | 13830149 | 13831112 | 964 SAT1_CF  | blue | na |
| chrUn | 13831167 | 13832139 | 973 SAT1_CF  | blue | na |
| chrUn | 13832246 | 13832728 | 483 SAT1_CF  | blue | na |
| chrUn | 13832741 | 13832849 | 109 SAT1_CF  | blue | na |
| chrUn | 13832870 | 13833619 | 750 SAT1_CF  | blue | na |
| chrUn | 13833641 | 13834187 | 547 SAT1_CF  | blue | na |
| chrUn | 13834231 | 13836108 | 1878 SAT1_CF | blue | na |
| chrUn | 13836284 | 13836468 | 185 SAT1_CF  | blue | na |
| chrUn | 13836485 | 13837002 | 518 SAT1_CF  | blue | na |
| chrUn | 13837016 | 13837551 | 536 SAT1_CF  | blue | na |
| chrUn | 13837563 | 13838892 | 1330 SAT1_CF | blue | na |
| chrUn | 13838935 | 13839903 | 969 SAT1_CF  | blue | na |
| chrUn | 13839946 | 13840925 | 980 SAT1_CF  | blue | na |
| chrUn | 13840937 | 13841050 | 114 SAT1_CF  | blue | na |
| chrUn | 13841065 | 13841612 | 548 SAT1_CF  | blue | na |
| chrUn | 13841655 | 13843694 | 2040 SAT1_CF | blue | na |

|       |          |          |              |      |    |
|-------|----------|----------|--------------|------|----|
| chrUn | 13843715 | 13844235 | 521 SAT1_CF  | blue | na |
| chrUn | 13844248 | 13844929 | 682 SAT1_CF  | blue | na |
| chrUn | 13844942 | 13845604 | 663 SAT1_CF  | blue | na |
| chrUn | 13845647 | 13846278 | 632 SAT1_CF  | blue | na |
| chrUn | 13846306 | 13846867 | 562 SAT1_CF  | blue | na |
| chrUn | 13846947 | 13848015 | 1069 SAT1_CF | blue | na |
| chrUn | 13848027 | 13849569 | 1543 SAT1_CF | blue | na |
| chrUn | 13849613 | 13850006 | 394 SAT1_CF  | blue | na |
| chrUn | 13850020 | 13850518 | 499 SAT1_CF  | blue | na |
| chrUn | 13850530 | 13850639 | 110 SAT1_CF  | blue | na |
| chrUn | 13850660 | 13851367 | 708 SAT1_CF  | blue | na |
| chrUn | 13851379 | 13852056 | 678 SAT1_CF  | blue | na |
| chrUn | 13852099 | 13853063 | 965 SAT1_CF  | blue | na |
| chrUn | 13853140 | 13853685 | 546 SAT1_CF  | blue | na |
| chrUn | 13853698 | 13854528 | 831 SAT1_CF  | blue | na |
| chrUn | 13854613 | 13855156 | 544 SAT1_CF  | blue | na |
| chrUn | 13855248 | 13856393 | 1146 SAT1_CF | blue | na |
| chrUn | 13856467 | 13857562 | 1096 SAT1_CF | blue | na |
| chrUn | 13857576 | 13858198 | 623 SAT1_CF  | blue | na |
| chrUn | 13858210 | 13858885 | 676 SAT1_CF  | blue | na |
| chrUn | 13858946 | 13860317 | 1372 SAT1_CF | blue | na |
| chrUn | 13860330 | 13860682 | 353 SAT1_CF  | blue | na |
| chrUn | 13860800 | 13862392 | 1593 SAT1_CF | blue | na |
| chrUn | 13862403 | 13863031 | 629 SAT1_CF  | blue | na |
| chrUn | 13863046 | 13863151 | 106 SAT1_CF  | blue | na |
| chrUn | 13863230 | 13863712 | 483 SAT1_CF  | blue | na |
| chrUn | 13863738 | 13864410 | 673 SAT1_CF  | blue | na |
| chrUn | 13864471 | 13865336 | 866 SAT1_CF  | blue | na |
| chrUn | 13865356 | 13865460 | 105 SAT1_CF  | blue | na |
| chrUn | 13865485 | 13866036 | 552 SAT1_CF  | blue | na |
| chrUn | 13866048 | 13866725 | 678 SAT1_CF  | blue | na |
| chrUn | 13866772 | 13868143 | 1372 SAT1_CF | blue | na |
| chrUn | 13868211 | 13868733 | 523 SAT1_CF  | blue | na |
| chrUn | 13868776 | 13870194 | 1419 SAT1_CF | blue | na |
| chrUn | 13870207 | 13870314 | 108 SAT1_CF  | blue | na |
| chrUn | 13870336 | 13870966 | 631 SAT1_CF  | blue | na |
| chrUn | 13870980 | 13872524 | 1545 SAT1_CF | blue | na |
| chrUn | 13872709 | 13873785 | 1077 SAT1_CF | blue | na |
| chrUn | 13873967 | 13874148 | 182 SAT1_CF  | blue | na |
| chrUn | 13874188 | 13874688 | 501 SAT1_CF  | blue | na |
| chrUn | 13874701 | 13874807 | 107 SAT1_CF  | blue | na |
| chrUn | 13874830 | 13875841 | 1012 SAT1_CF | blue | na |

|       |          |          |              |      |    |
|-------|----------|----------|--------------|------|----|
| chrUn | 13875875 | 13877076 | 1202 SAT1_CF | blue | na |
| chrUn | 13877124 | 13877331 | 208 SAT1_CF  | blue | na |
| chrUn | 13877357 | 13877902 | 546 SAT1_CF  | blue | na |
| chrUn | 13877927 | 13877978 | 52 SAT1_CF   | blue | na |
| chrUn | 13877995 | 13878387 | 393 SAT1_CF  | blue | na |
| chrUn | 13878408 | 13878927 | 520 SAT1_CF  | blue | na |
| chrUn | 13878940 | 13879041 | 102 SAT1_CF  | blue | na |
| chrUn | 13879069 | 13879624 | 556 SAT1_CF  | blue | na |
| chrUn | 13879636 | 13880313 | 678 SAT1_CF  | blue | na |
| chrUn | 13880410 | 13880952 | 543 SAT1_CF  | blue | na |
| chrUn | 13880977 | 13881337 | 361 SAT1_CF  | blue | na |
| chrUn | 13881415 | 13881970 | 556 SAT1_CF  | blue | na |
| chrUn | 13881982 | 13882667 | 686 SAT1_CF  | blue | na |
| chrUn | 13882680 | 13884010 | 1331 SAT1_CF | blue | na |
| chrUn | 13884054 | 13885261 | 1208 SAT1_CF | blue | na |
| chrUn | 13885473 | 13885630 | 158 SAT1_CF  | blue | na |
| chrUn | 13885675 | 13886174 | 500 SAT1_CF  | blue | na |
| chrUn | 13886187 | 13886295 | 109 SAT1_CF  | blue | na |
| chrUn | 13886316 | 13887348 | 1033 SAT1_CF | blue | na |
| chrUn | 13887388 | 13888571 | 1184 SAT1_CF | blue | na |
| chrUn | 13888594 | 13889921 | 1328 SAT1_CF | blue | na |
| chrUn | 13889934 | 13890606 | 673 SAT1_CF  | blue | na |
| chrUn | 13890651 | 13891282 | 632 SAT1_CF  | blue | na |
| chrUn | 13891310 | 13894098 | 2789 SAT1_CF | blue | na |
| chrUn | 13894127 | 13894802 | 676 SAT1_CF  | blue | na |
| chrUn | 13894870 | 13895370 | 501 SAT1_CF  | blue | na |
| chrUn | 13895383 | 13897535 | 2153 SAT1_CF | blue | na |
| chrUn | 13897566 | 13898820 | 1255 SAT1_CF | blue | na |
| chrUn | 13898845 | 13899170 | 326 SAT1_CF  | blue | na |
| chrUn | 13899250 | 13900173 | 924 SAT1_CF  | blue | na |
| chrUn | 13900211 | 13900712 | 502 SAT1_CF  | blue | na |
| chrUn | 13900725 | 13901586 | 862 SAT1_CF  | blue | na |
| chrUn | 13901663 | 13902207 | 545 SAT1_CF  | blue | na |
| chrUn | 13902286 | 13902810 | 525 SAT1_CF  | blue | na |
| chrUn | 13902825 | 13903525 | 701 SAT1_CF  | blue | na |
| chrUn | 13903538 | 13904147 | 610 SAT1_CF  | blue | na |
| chrUn | 13904159 | 13905017 | 859 SAT1_CF  | blue | na |
| chrUn | 13905059 | 13905757 | 699 SAT1_CF  | blue | na |
| chrUn | 13905771 | 13906318 | 548 SAT1_CF  | blue | na |
| chrUn | 13906400 | 13906876 | 477 SAT1_CF  | blue | na |
| chrUn | 13906954 | 13907455 | 502 SAT1_CF  | blue | na |
| chrUn | 13907468 | 13907581 | 114 SAT1_CF  | blue | na |

|       |          |          |              |      |    |
|-------|----------|----------|--------------|------|----|
| chrUn | 13907598 | 13908997 | 1400 SAT1_CF | blue | na |
| chrUn | 13909040 | 13910004 | 965 SAT1_CF  | blue | na |
| chrUn | 13910048 | 13911005 | 958 SAT1_CF  | blue | na |
| chrUn | 13911045 | 13911539 | 495 SAT1_CF  | blue | na |
| chrUn | 13911553 | 13911667 | 115 SAT1_CF  | blue | na |
| chrUn | 13911692 | 13912319 | 628 SAT1_CF  | blue | na |
| chrUn | 13912331 | 13913168 | 838 SAT1_CF  | blue | na |
| chrUn | 13913349 | 13913534 | 186 SAT1_CF  | blue | na |
| chrUn | 13913570 | 13914069 | 500 SAT1_CF  | blue | na |
| chrUn | 13914082 | 13914765 | 684 SAT1_CF  | blue | na |
| chrUn | 13914777 | 13915456 | 680 SAT1_CF  | blue | na |
| chrUn | 13915470 | 13917060 | 1591 SAT1_CF | blue | na |
| chrUn | 13917077 | 13917144 | 68 SAT1_CF   | blue | na |
| chrUn | 13917167 | 13917691 | 525 SAT1_CF  | blue | na |
| chrUn | 13917748 | 13918294 | 547 SAT1_CF  | blue | na |
| chrUn | 13918337 | 13918862 | 526 SAT1_CF  | blue | na |
| chrUn | 13918873 | 13919928 | 1056 SAT1_CF | blue | na |
| chrUn | 13919971 | 13920513 | 543 SAT1_CF  | blue | na |
| chrUn | 13920536 | 13922488 | 1953 SAT1_CF | blue | na |
| chrUn | 13922515 | 13924125 | 1611 SAT1_CF | blue | na |
| chrUn | 13924169 | 13925139 | 971 SAT1_CF  | blue | na |
| chrUn | 13925182 | 13925553 | 372 SAT1_CF  | blue | na |
| chrUn | 13925589 | 13926088 | 500 SAT1_CF  | blue | na |
| chrUn | 13926133 | 13926785 | 653 SAT1_CF  | blue | na |
| chrUn | 13926797 | 13928607 | 1811 SAT1_CF | blue | na |
| chrUn | 13928646 | 13928811 | 166 SAT1_CF  | blue | na |
| chrUn | 13928995 | 13929180 | 186 SAT1_CF  | blue | na |
| chrUn | 13929217 | 13929711 | 495 SAT1_CF  | blue | na |
| chrUn | 13929731 | 13929839 | 109 SAT1_CF  | blue | na |
| chrUn | 13929859 | 13930417 | 559 SAT1_CF  | blue | na |
| chrUn | 13930430 | 13931282 | 853 SAT1_CF  | blue | na |
| chrUn | 13931367 | 13931911 | 545 SAT1_CF  | blue | na |
| chrUn | 13931953 | 13932131 | 179 SAT1_CF  | blue | na |
| chrUn | 13932191 | 13933105 | 915 SAT1_CF  | blue | na |
| chrUn | 13933192 | 13933693 | 502 SAT1_CF  | blue | na |
| chrUn | 13933706 | 13934382 | 677 SAT1_CF  | blue | na |
| chrUn | 13934407 | 13934596 | 190 SAT1_CF  | blue | na |
| chrUn | 13934645 | 13935239 | 595 SAT1_CF  | blue | na |
| chrUn | 13936641 | 13937158 | 518 SAT1_CF  | blue | na |
| chrUn | 13937245 | 13937739 | 495 SAT1_CF  | blue | na |
| chrUn | 13937759 | 13938441 | 683 SAT1_CF  | blue | na |
| chrUn | 13938464 | 13939129 | 666 SAT1_CF  | blue | na |

|       |          |          |              |      |    |
|-------|----------|----------|--------------|------|----|
| chrUn | 13939143 | 13939785 | 643 SAT1_CF  | blue | na |
| chrUn | 13939829 | 13941034 | 1206 SAT1_CF | blue | na |
| chrUn | 13941049 | 13941185 | 137 SAT1_CF  | blue | na |
| chrUn | 13941232 | 13941751 | 520 SAT1_CF  | blue | na |
| chrUn | 13941765 | 13942447 | 683 SAT1_CF  | blue | na |
| chrUn | 13942459 | 13945784 | 3326 SAT1_CF | blue | na |
| chrUn | 13945826 | 13945990 | 165 SAT1_CF  | blue | na |
| chrUn | 13946172 | 13946357 | 186 SAT1_CF  | blue | na |
| chrUn | 13946374 | 13946894 | 521 SAT1_CF  | blue | na |
| chrUn | 13946907 | 13947015 | 109 SAT1_CF  | blue | na |
| chrUn | 13947035 | 13947594 | 560 SAT1_CF  | blue | na |
| chrUn | 13947606 | 13948273 | 668 SAT1_CF  | blue | na |
| chrUn | 13948317 | 13950759 | 2443 SAT1_CF | blue | na |
| chrUn | 13950774 | 13951439 | 666 SAT1_CF  | blue | na |
| chrUn | 13951453 | 13952134 | 682 SAT1_CF  | blue | na |
| chrUn | 13952146 | 13952268 | 123 SAT1_CF  | blue | na |
| chrUn | 13952279 | 13952827 | 549 SAT1_CF  | blue | na |
| chrUn | 13952838 | 13953439 | 602 SAT1_CF  | blue | na |
| chrUn | 13953451 | 13954127 | 677 SAT1_CF  | blue | na |
| chrUn | 13954170 | 13956855 | 2686 SAT1_CF | blue | na |
| chrUn | 13956868 | 13957270 | 403 SAT1_CF  | blue | na |
| chrUn | 13957310 | 13957812 | 503 SAT1_CF  | blue | na |
| chrUn | 13957825 | 13959579 | 1755 SAT1_CF | blue | na |
| chrUn | 13959607 | 13960131 | 525 SAT1_CF  | blue | na |
| chrUn | 13960144 | 13960389 | 246 SAT1_CF  | blue | na |
| chrUn | 13960431 | 13961213 | 783 SAT1_CF  | blue | na |
| chrUn | 13961292 | 13961801 | 510 SAT1_CF  | blue | na |
| chrUn | 13961814 | 13962169 | 356 SAT1_CF  | blue | na |
| chrUn | 13962256 | 13962758 | 503 SAT1_CF  | blue | na |
| chrUn | 13962771 | 13965457 | 2687 SAT1_CF | blue | na |
| chrUn | 13965574 | 13966094 | 521 SAT1_CF  | blue | na |
| chrUn | 13966125 | 13967735 | 1611 SAT1_CF | blue | na |
| chrUn | 13967766 | 13968612 | 847 SAT1_CF  | blue | na |
| chrUn | 13968624 | 13968733 | 110 SAT1_CF  | blue | na |
| chrUn | 13968754 | 13969481 | 728 SAT1_CF  | blue | na |
| chrUn | 13969534 | 13970968 | 1435 SAT1_CF | blue | na |
| chrUn | 13971012 | 13971669 | 658 SAT1_CF  | blue | na |
| chrUn | 13971713 | 13972253 | 541 SAT1_CF  | blue | na |
| chrUn | 13972265 | 13973529 | 1265 SAT1_CF | blue | na |
| chrUn | 13973567 | 13974679 | 1113 SAT1_CF | blue | na |
| chrUn | 13974699 | 13975460 | 762 SAT1_CF  | blue | na |
| chrUn | 13975472 | 13976147 | 676 SAT1_CF  | blue | na |

|       |          |          |              |      |    |
|-------|----------|----------|--------------|------|----|
| chrUn | 13976208 | 13977401 | 1194 SAT1_CF | blue | na |
| chrUn | 13977432 | 13977944 | 513 SAT1_CF  | blue | na |
| chrUn | 13977972 | 13978108 | 137 SAT1_CF  | blue | na |
| chrUn | 13978193 | 13978675 | 483 SAT1_CF  | blue | na |
| chrUn | 13978688 | 13979368 | 681 SAT1_CF  | blue | na |
| chrUn | 13979380 | 13980237 | 858 SAT1_CF  | blue | na |
| chrUn | 13980279 | 13980821 | 543 SAT1_CF  | blue | na |
| chrUn | 13980839 | 13981464 | 626 SAT1_CF  | blue | na |
| chrUn | 13981507 | 13982089 | 583 SAT1_CF  | blue | na |
| chrUn | 13982157 | 13982678 | 522 SAT1_CF  | blue | na |
| chrUn | 13982692 | 13982798 | 107 SAT1_CF  | blue | na |
| chrUn | 13982819 | 13984244 | 1426 SAT1_CF | blue | na |
| chrUn | 13984286 | 13985102 | 817 SAT1_CF  | blue | na |
| chrUn | 13985183 | 13985731 | 549 SAT1_CF  | blue | na |
| chrUn | 13985745 | 13986576 | 832 SAT1_CF  | blue | na |
| chrUn | 13986589 | 13986696 | 108 SAT1_CF  | blue | na |
| chrUn | 13986718 | 13987292 | 575 SAT1_CF  | blue | na |
| chrUn | 13987304 | 13987980 | 677 SAT1_CF  | blue | na |
| chrUn | 13988023 | 13989582 | 1560 SAT1_CF | blue | na |
| chrUn | 13989596 | 13990140 | 545 SAT1_CF  | blue | na |
| chrUn | 13990152 | 13990271 | 120 SAT1_CF  | blue | na |
| chrUn | 13990282 | 13990826 | 545 SAT1_CF  | blue | na |
| chrUn | 13990875 | 13990991 | 117 SAT1_CF  | blue | na |
| chrUn | 13991033 | 13992070 | 1038 SAT1_CF | blue | na |
| chrUn | 13992127 | 13992759 | 633 SAT1_CF  | blue | na |
| chrUn | 13992771 | 13993374 | 604 SAT1_CF  | blue | na |
| chrUn | 13993387 | 13993493 | 107 SAT1_CF  | blue | na |
| chrUn | 13993514 | 13994067 | 554 SAT1_CF  | blue | na |
| chrUn | 13994079 | 13994944 | 866 SAT1_CF  | blue | na |
| chrUn | 13994986 | 13998022 | 3037 SAT1_CF | blue | na |
| chrUn | 13998204 | 13998385 | 182 SAT1_CF  | blue | na |
| chrUn | 13998406 | 13998925 | 520 SAT1_CF  | blue | na |
| chrUn | 13998938 | 13999043 | 106 SAT1_CF  | blue | na |
| chrUn | 13999066 | 14000338 | 1273 SAT1_CF | blue | na |
| chrUn | 14000353 | 14000489 | 137 SAT1_CF  | blue | na |
| chrUn | 14000555 | 14001057 | 503 SAT1_CF  | blue | na |
| chrUn | 14001070 | 14001176 | 107 SAT1_CF  | blue | na |
| chrUn | 14001198 | 14003053 | 1856 SAT1_CF | blue | na |
| chrUn | 14003066 | 14003468 | 403 SAT1_CF  | blue | na |
| chrUn | 14003508 | 14004010 | 503 SAT1_CF  | blue | na |
| chrUn | 14004037 | 14004782 | 746 SAT1_CF  | blue | na |
| chrUn | 14004794 | 14005592 | 799 SAT1_CF  | blue | na |

|       |          |          |      |         |        |    |
|-------|----------|----------|------|---------|--------|----|
| chrUn | 14007121 | 14007840 | 720  | CarSat1 | red    | na |
| chrUn | 14007835 | 14008450 | 616  | SAT1_CF | blue   | na |
| chrUn | 14008464 | 14008967 | 504  | SAT1_CF | blue   | na |
| chrUn | 14009007 | 14010503 | 1497 | SAT1_CF | blue   | na |
| chrUn | 14010525 | 14011730 | 1206 | SAT1_CF | blue   | na |
| chrUn | 14011742 | 14012184 | 443  | SAT1_CF | blue   | na |
| chrUn | 14012186 | 14014156 | 1971 | CarSat1 | red    | na |
| chrUn | 14014177 | 14014477 | 301  | CarSat1 | red    | na |
| chrUn | 14014720 | 14016001 | 1282 | CarSat1 | red    | na |
| chrUn | 14016023 | 14016724 | 702  | CarSat1 | red    | na |
| chrUn | 14037327 | 14037489 | 163  | Sat2CF  | purple | na |
| chrUn | 14037355 | 14038055 | 701  | Sat2CF  | purple | na |
| chrUn | 14068419 | 14069656 | 1238 | Sat2CF  | purple | na |
| chrUn | 14110066 | 14111251 | 1186 | Sat2CF  | purple | na |
| chrUn | 14135971 | 14137190 | 1220 | Sat2CF  | purple | na |
| chrUn | 14136105 | 14137185 | 1081 | Sat2CF  | purple | na |
| chrUn | 14156850 | 14157166 | 317  | Sat2CF  | purple | na |
| chrUn | 14156852 | 14157217 | 366  | Sat2CF  | purple | na |
| chrUn | 14159680 | 14159821 | 142  | CarSat1 | red    | na |
| chrUn | 14159842 | 14160884 | 1043 | CarSat1 | red    | na |
| chrUn | 14160900 | 14161376 | 477  | CarSat1 | red    | na |
| chrUn | 14170293 | 14171026 | 734  | CarSat1 | red    | na |
| chrUn | 14171047 | 14172642 | 1596 | CarSat1 | red    | na |
| chrUn | 14172661 | 14174254 | 1594 | CarSat1 | red    | na |
| chrUn | 14174274 | 14175542 | 1269 | CarSat1 | red    | na |
| chrUn | 14182906 | 14183425 | 520  | Sat2CF  | purple | na |
| chrUn | 14182908 | 14183531 | 624  | Sat2CF  | purple | na |
| chrUn | 14182986 | 14183458 | 473  | Sat2CF  | purple | na |
| chrUn | 14192471 | 14192802 | 332  | Sat2CF  | purple | na |
| chrUn | 14192512 | 14193027 | 516  | Sat2CF  | purple | na |
| chrUn | 14192898 | 14193047 | 150  | Sat2CF  | purple | na |
| chrUn | 14207918 | 14209053 | 1136 | Sat2CF  | purple | na |
| chrUn | 14208876 | 14209077 | 202  | Sat2CF  | purple | na |
| chrUn | 14208946 | 14209122 | 177  | Sat2CF  | purple | na |
| chrUn | 14237162 | 14237514 | 353  | Sat2CF  | purple | na |
| chrUn | 14237221 | 14238011 | 791  | Sat2CF  | purple | na |
| chrUn | 14252845 | 14253794 | 950  | Sat2CF  | purple | na |
| chrUn | 14252908 | 14253714 | 807  | Sat2CF  | purple | na |
| chrUn | 14276219 | 14276956 | 738  | Sat2CF  | purple | na |
| chrUn | 14276293 | 14276954 | 662  | Sat2CF  | purple | na |
| chrUn | 14307927 | 14308809 | 883  | Sat2CF  | purple | na |
| chrUn | 14308016 | 14309098 | 1083 | Sat2CF  | purple | na |



|       |          |          |              |        |    |
|-------|----------|----------|--------------|--------|----|
| chrUn | 14308974 | 14309123 | 150 Sat2CF   | purple | na |
| chrUn | 14324017 | 14324900 | 884 Sat2CF   | purple | na |
| chrUn | 14324163 | 14324973 | 811 Sat2CF   | purple | na |
| chrUn | 14353247 | 14354362 | 1116 Sat2CF  | purple | na |
| chrUn | 14399159 | 14400059 | 901 Sat2CF   | purple | na |
| chrUn | 14427733 | 14428840 | 1108 Sat2CF  | purple | na |
| chrUn | 14436844 | 14438055 | 1212 Sat2CF  | purple | na |
| chrUn | 14453321 | 14454570 | 1250 Sat2CF  | purple | na |
| chrUn | 14453451 | 14454537 | 1087 Sat2CF  | purple | na |
| chrUn | 14485290 | 14486505 | 1216 Sat2CF  | purple | na |
| chrUn | 14485418 | 14486500 | 1083 Sat2CF  | purple | na |
| chrUn | 14486376 | 14486525 | 150 Sat2CF   | purple | na |
| chrUn | 14505009 | 14505293 | 285 CarSat1  | red    | na |
| chrUn | 14505521 | 14506163 | 643 CarSat1  | red    | na |
| chrUn | 14506158 | 14506773 | 616 SAT1_CF  | blue   | na |
| chrUn | 14506786 | 14507288 | 503 SAT1_CF  | blue   | na |
| chrUn | 14507328 | 14510019 | 2692 SAT1_CF | blue   | na |
| chrUn | 14510031 | 14510502 | 472 SAT1_CF  | blue   | na |
| chrUn | 14510504 | 14512479 | 1976 CarSat1 | red    | na |
| chrUn | 14512500 | 14514088 | 1589 CarSat1 | red    | na |
| chrUn | 14514189 | 14514811 | 623 CarSat1  | red    | na |
| chrUn | 14527334 | 14528141 | 808 Sat2CF   | purple | na |
| chrUn | 14555522 | 14556678 | 1157 Sat2CF  | purple | na |
| chrUn | 14555659 | 14556656 | 998 Sat2CF   | purple | na |
| chrUn | 14577177 | 14577872 | 696 Sat2CF   | purple | na |
| chrUn | 14577765 | 14577914 | 150 Sat2CF   | purple | na |
| chrUn | 14597669 | 14598367 | 699 Sat2CF   | purple | na |
| chrUn | 14612862 | 14614030 | 1169 Sat2CF  | purple | na |
| chrUn | 14613577 | 14614082 | 506 Sat2CF   | purple | na |
| chrUn | 14628777 | 14629588 | 812 Sat2CF   | purple | na |
| chrUn | 14629457 | 14629625 | 169 Sat2CF   | purple | na |
| chrUn | 14641393 | 14642535 | 1143 Sat2CF  | purple | na |
| chrUn | 14642066 | 14642597 | 532 Sat2CF   | purple | na |
| chrUn | 14672770 | 14673946 | 1177 Sat2CF  | purple | na |
| chrUn | 14701778 | 14702677 | 900 Sat2CF   | purple | na |
| chrUn | 14701841 | 14702632 | 792 Sat2CF   | purple | na |
| chrUn | 14727495 | 14728663 | 1169 Sat2CF  | purple | na |
| chrUn | 14728555 | 14728734 | 180 Sat2CF   | purple | na |
| chrUn | 14743557 | 14744388 | 832 Sat2CF   | purple | na |
| chrUn | 14743641 | 14744367 | 727 Sat2CF   | purple | na |
| chrUn | 14744257 | 14744425 | 169 Sat2CF   | purple | na |
| chrUn | 14754593 | 14755769 | 1177 Sat2CF  | purple | na |

|       |          |          |              |        |    |
|-------|----------|----------|--------------|--------|----|
| chrUn | 14754735 | 14755740 | 1006 Sat2CF  | purple | na |
| chrUn | 14803091 | 14804318 | 1228 Sat2CF  | purple | na |
| chrUn | 14822579 | 14823713 | 1135 Sat2CF  | purple | na |
| chrUn | 14822706 | 14823644 | 939 Sat2CF   | purple | na |
| chrUn | 14823528 | 14823674 | 147 Sat2CF   | purple | na |
| chrUn | 14832571 | 14832908 | 338 Sat2CF   | purple | na |
| chrUn | 14832618 | 14833148 | 531 Sat2CF   | purple | na |
| chrUn | 14833004 | 14833180 | 177 Sat2CF   | purple | na |
| chrUn | 14848080 | 14848889 | 810 Sat2CF   | purple | na |
| chrUn | 14848761 | 14848928 | 168 Sat2CF   | purple | na |
| chrUn | 14861045 | 14862122 | 1078 Sat2CF  | purple | na |
| chrUn | 14861175 | 14862113 | 939 Sat2CF   | purple | na |
| chrUn | 14864781 | 14866368 | 1588 CarSat1 | red    | na |
| chrUn | 14866395 | 14867879 | 1485 CarSat1 | red    | na |
| chrUn | 14876403 | 14877115 | 713 CarSat1  | red    | na |
| chrUn | 14877308 | 14877941 | 634 CarSat1  | red    | na |
| chrUn | 14877957 | 14878929 | 973 CarSat1  | red    | na |
| chrUn | 14878954 | 14879666 | 713 CarSat1  | red    | na |
| chrUn | 14879682 | 14881140 | 1459 CarSat1 | red    | na |
| chrUn | 14881156 | 14881625 | 470 CarSat1  | red    | na |
| chrUn | 14881651 | 14884719 | 3069 CarSat1 | red    | na |
| chrUn | 14884744 | 14886190 | 1447 CarSat1 | red    | na |
| chrUn | 14886215 | 14886919 | 705 CarSat1  | red    | na |
| chrUn | 14886944 | 14887375 | 432 CarSat1  | red    | na |
| chrUn | 14887422 | 14888105 | 684 CarSat1  | red    | na |
| chrUn | 14888188 | 14888831 | 644 CarSat1  | red    | na |
| chrUn | 14888852 | 14890030 | 1179 CarSat1 | red    | na |
| chrUn | 14890060 | 14890469 | 410 CarSat1  | red    | na |
| chrUn | 14897096 | 14898263 | 1168 Sat2CF  | purple | na |
| chrUn | 14953591 | 14954533 | 943 Sat2CF   | purple | na |
| chrUn | 14953602 | 14954689 | 1088 Sat2CF  | purple | na |
| chrUn | 14954559 | 14954760 | 202 Sat2CF   | purple | na |
| chrUn | 14956442 | 14956854 | 413 CarSat1  | red    | na |
| chrUn | 14957822 | 14959406 | 1585 CarSat1 | red    | na |
| chrUn | 14959427 | 14960139 | 713 CarSat1  | red    | na |
| chrUn | 14960299 | 14961537 | 1239 CarSat1 | red    | na |
| chrUn | 14961575 | 14962457 | 883 CarSat1  | red    | na |
| chrUn | 14962452 | 14963995 | 1544 SAT1_CF | blue   | na |
| chrUn | 14964037 | 14966170 | 2134 SAT1_CF | blue   | na |
| chrUn | 14966183 | 14966726 | 544 SAT1_CF  | blue   | na |
| chrUn | 14966758 | 14967645 | 888 SAT1_CF  | blue   | na |
| chrUn | 14973910 | 14978800 | 4891 SAT1_CF | blue   | na |

|       |          |          |      |         |        |    |
|-------|----------|----------|------|---------|--------|----|
| chrUn | 14978799 | 14979978 | 1180 | CarSat1 | red    | na |
| chrUn | 14979997 | 14981511 | 1515 | CarSat1 | red    | na |
| chrUn | 14981533 | 14982524 | 992  | CarSat1 | red    | na |
| chrUn | 14998533 | 14998928 | 396  | CarSat1 | red    | na |
| chrUn | 14998990 | 14999714 | 725  | CarSat1 | red    | na |
| chrUn | 14999725 | 15001429 | 1705 | SAT1_CF | blue   | na |
| chrUn | 15001472 | 15003149 | 1678 | SAT1_CF | blue   | na |
| chrUn | 15003154 | 15004087 | 934  | CarSat1 | red    | na |
| chrUn | 15004100 | 15005322 | 1223 | CarSat1 | red    | na |
| chrUn | 15005346 | 15005876 | 531  | CarSat1 | red    | na |
| chrUn | 15005976 | 15007451 | 1476 | CarSat1 | red    | na |
| chrUn | 15007471 | 15009072 | 1602 | CarSat1 | red    | na |
| chrUn | 15009093 | 15009794 | 702  | CarSat1 | red    | na |
| chrUn | 15023323 | 15023485 | 163  | Sat2CF  | purple | na |
| chrUn | 15023351 | 15024064 | 714  | Sat2CF  | purple | na |
| chrUn | 15042904 | 15044080 | 1177 | Sat2CF  | purple | na |
| chrUn | 15056093 | 15056444 | 352  | Sat2CF  | purple | na |
| chrUn | 15056158 | 15056405 | 248  | Sat2CF  | purple | na |
| chrUn | 15056162 | 15056438 | 277  | Sat2CF  | purple | na |
| chrUn | 15071812 | 15073065 | 1254 | Sat2CF  | purple | na |
| chrUn | 15071943 | 15073063 | 1121 | Sat2CF  | purple | na |
| chrUn | 15091651 | 15092732 | 1082 | Sat2CF  | purple | na |
| chrUn | 15092603 | 15092769 | 167  | Sat2CF  | purple | na |
| chrUn | 15119915 | 15121093 | 1179 | Sat2CF  | purple | na |
| chrUn | 15136374 | 15137407 | 1034 | Sat2CF  | purple | na |
| chrUn | 15137262 | 15137442 | 181  | Sat2CF  | purple | na |
| chrUn | 15162862 | 15163786 | 925  | Sat2CF  | purple | na |
| chrUn | 15162873 | 15163670 | 798  | Sat2CF  | purple | na |
| chrUn | 15174882 | 15175819 | 938  | Sat2CF  | purple | na |
| chrUn | 15174893 | 15175940 | 1048 | Sat2CF  | purple | na |
| chrUn | 15199286 | 15200469 | 1184 | Sat2CF  | purple | na |
| chrUn | 15200303 | 15200501 | 199  | Sat2CF  | purple | na |
| chrUn | 15230084 | 15231335 | 1252 | Sat2CF  | purple | na |
| chrUn | 15234026 | 15234391 | 366  | CarSat1 | red    | na |
| chrUn | 15234440 | 15235456 | 1017 | CarSat1 | red    | na |
| chrUn | 15235472 | 15235945 | 474  | CarSat1 | red    | na |
| chrUn | 15241182 | 15242700 | 1519 | CarSat1 | red    | na |
| chrUn | 15242723 | 15243803 | 1081 | CarSat1 | red    | na |
| chrUn | 15247782 | 15248913 | 1132 | Sat2CF  | purple | na |
| chrUn | 15248598 | 15248965 | 368  | Sat2CF  | purple | na |
| chrUn | 15248806 | 15248985 | 180  | Sat2CF  | purple | na |
| chrUn | 15276857 | 15277752 | 896  | Sat2CF  | purple | na |

|       |          |          |              |        |    |
|-------|----------|----------|--------------|--------|----|
| chrUn | 15276920 | 15277707 | 788 Sat2CF   | purple | na |
| chrUn | 15415083 | 15415245 | 163 Sat2CF   | purple | na |
| chrUn | 15415111 | 15415449 | 339 Sat2CF   | purple | na |
| chrUn | 15415146 | 15416035 | 890 Sat2CF   | purple | na |
| chrUn | 15415222 | 15416001 | 780 Sat2CF   | purple | na |
| chrUn | 15444710 | 15445097 | 388 Sat2CF   | purple | na |
| chrUn | 15444784 | 15445538 | 755 Sat2CF   | purple | na |
| chrUn | 15445732 | 15445966 | 235 Sat2CF   | purple | na |
| chrUn | 15445734 | 15445933 | 200 Sat2CF   | purple | na |
| chrUn | 15480882 | 15482049 | 1168 Sat2CF  | purple | na |
| chrUn | 15481941 | 15482120 | 180 Sat2CF   | purple | na |
| chrUn | 15497138 | 15497964 | 827 Sat2CF   | purple | na |
| chrUn | 15497222 | 15497948 | 727 Sat2CF   | purple | na |
| chrUn | 15497838 | 15498006 | 169 Sat2CF   | purple | na |
| chrUn | 15508434 | 15509612 | 1179 Sat2CF  | purple | na |
| chrUn | 15549177 | 15549338 | 162 Sat2CF   | purple | na |
| chrUn | 15549205 | 15549561 | 357 Sat2CF   | purple | na |
| chrUn | 15549244 | 15550071 | 828 Sat2CF   | purple | na |
| chrUn | 15565450 | 15566247 | 798 Sat2CF   | purple | na |
| chrUn | 15566130 | 15566297 | 168 Sat2CF   | purple | na |
| chrUn | 15566130 | 15566297 | 168 Sat2CF   | purple | na |
| chrUn | 15576477 | 15576761 | 285 CarSat1  | red    | na |
| chrUn | 15576914 | 15577633 | 720 CarSat1  | red    | na |
| chrUn | 15577628 | 15578232 | 605 SAT1_CF  | blue   | na |
| chrUn | 15578254 | 15578756 | 503 SAT1_CF  | blue   | na |
| chrUn | 15578796 | 15579757 | 962 SAT1_CF  | blue   | na |
| chrUn | 15579835 | 15580618 | 784 SAT1_CF  | blue   | na |
| chrUn | 15580648 | 15581447 | 800 SAT1_CF  | blue   | na |
| chrUn | 15581459 | 15581842 | 384 SAT1_CF  | blue   | na |
| chrUn | 15581854 | 15583829 | 1976 CarSat1 | red    | na |
| chrUn | 15583851 | 15584552 | 702 CarSat1  | red    | na |
| chrUn | 15606737 | 15607503 | 767 Sat2CF   | purple | na |
| chrUn | 15639061 | 15640219 | 1159 Sat2CF  | purple | na |
| chrUn | 15639201 | 15640197 | 997 Sat2CF   | purple | na |
| chrUn | 15660514 | 15661279 | 766 Sat2CF   | purple | na |
| chrUn | 15680319 | 15681462 | 1144 Sat2CF  | purple | na |
| chrUn | 15681334 | 15681482 | 149 Sat2CF   | purple | na |
| chrUn | 15695980 | 15697149 | 1170 Sat2CF  | purple | na |
| chrUn | 15697041 | 15697218 | 178 Sat2CF   | purple | na |
| chrUn | 15712267 | 15713066 | 800 Sat2CF   | purple | na |
| chrUn | 15712948 | 15713116 | 169 Sat2CF   | purple | na |
| chrUn | 15725132 | 15726306 | 1175 Sat2CF  | purple | na |

|       |          |          |              |        |    |
|-------|----------|----------|--------------|--------|----|
| chrUn | 15800312 | 15801445 | 1134 Sat2CF  | purple | na |
| chrUn | 15800446 | 15801530 | 1085 Sat2CF  | purple | na |
| chrUn | 15830973 | 15831135 | 163 Sat2CF   | purple | na |
| chrUn | 15831001 | 15831339 | 339 Sat2CF   | purple | na |
| chrUn | 15831040 | 15831847 | 808 Sat2CF   | purple | na |
| chrUn | 15831248 | 15831918 | 671 Sat2CF   | purple | na |
| chrUn | 15860659 | 15861879 | 1221 Sat2CF  | purple | na |
| chrUn | 15861750 | 15861899 | 150 Sat2CF   | purple | na |
| chrUn | 15877425 | 15878694 | 1270 Sat2CF  | purple | na |
| chrUn | 15877428 | 15878562 | 1135 Sat2CF  | purple | na |
| chrUn | 15895606 | 15896786 | 1181 Sat2CF  | purple | na |
| chrUn | 15896680 | 15896858 | 179 Sat2CF   | purple | na |
| chrUn | 15911693 | 15912509 | 817 Sat2CF   | purple | na |
| chrUn | 15911767 | 15912488 | 722 Sat2CF   | purple | na |
| chrUn | 15912378 | 15912546 | 169 Sat2CF   | purple | na |
| chrUn | 15924565 | 15925466 | 902 Sat2CF   | purple | na |
| chrUn | 15968964 | 15969126 | 163 Sat2CF   | purple | na |
| chrUn | 15968992 | 15969349 | 358 Sat2CF   | purple | na |
| chrUn | 15969031 | 15969859 | 829 Sat2CF   | purple | na |
| chrUn | 16106711 | 16107878 | 1168 Sat2CF  | purple | na |
| chrUn | 16142104 | 16144373 | 2270 SAT1_CF | blue   | na |
| chrUn | 16144386 | 16144888 | 503 SAT1_CF  | blue   | na |
| chrUn | 16144901 | 16145592 | 692 SAT1_CF  | blue   | na |
| chrUn | 16145672 | 16146216 | 545 SAT1_CF  | blue   | na |
| chrUn | 16146233 | 16146565 | 333 SAT1_CF  | blue   | na |
| chrUn | 16146577 | 16148266 | 1690 SAT1_CF | blue   | na |
| chrUn | 16148309 | 16150470 | 2162 SAT1_CF | blue   | na |
| chrUn | 16150496 | 16150653 | 158 SAT1_CF  | blue   | na |
| chrUn | 16150673 | 16151860 | 1188 SAT1_CF | blue   | na |
| chrUn | 16151922 | 16152501 | 580 SAT1_CF  | blue   | na |
| chrUn | 16152541 | 16154701 | 2161 SAT1_CF | blue   | na |
| chrUn | 16154730 | 16155253 | 524 SAT1_CF  | blue   | na |
| chrUn | 16155280 | 16155465 | 186 SAT1_CF  | blue   | na |
| chrUn | 16155648 | 16155811 | 164 SAT1_CF  | blue   | na |
| chrUn | 16155890 | 16157675 | 1786 SAT1_CF | blue   | na |
| chrUn | 16157688 | 16158520 | 833 SAT1_CF  | blue   | na |
| chrUn | 16158537 | 16159099 | 563 SAT1_CF  | blue   | na |
| chrUn | 16159127 | 16159757 | 631 SAT1_CF  | blue   | na |
| chrUn | 16159800 | 16160346 | 547 SAT1_CF  | blue   | na |
| chrUn | 16160366 | 16160475 | 110 SAT1_CF  | blue   | na |
| chrUn | 16160487 | 16161249 | 763 SAT1_CF  | blue   | na |
| chrUn | 16161263 | 16161813 | 551 SAT1_CF  | blue   | na |

|       |          |          |              |      |    |
|-------|----------|----------|--------------|------|----|
| chrUn | 16161835 | 16161942 | 108 SAT1_CF  | blue | na |
| chrUn | 16161955 | 16162456 | 502 SAT1_CF  | blue | na |
| chrUn | 16162522 | 16162658 | 137 SAT1_CF  | blue | na |
| chrUn | 16162673 | 16163197 | 525 SAT1_CF  | blue | na |
| chrUn | 16163277 | 16163801 | 525 SAT1_CF  | blue | na |
| chrUn | 16163819 | 16164435 | 617 SAT1_CF  | blue | na |
| chrUn | 16164484 | 16165164 | 681 SAT1_CF  | blue | na |
| chrUn | 16165176 | 16165731 | 556 SAT1_CF  | blue | na |
| chrUn | 16165752 | 16165859 | 108 SAT1_CF  | blue | na |
| chrUn | 16165872 | 16166373 | 502 SAT1_CF  | blue | na |
| chrUn | 16166439 | 16166574 | 136 SAT1_CF  | blue | na |
| chrUn | 16166602 | 16167165 | 564 SAT1_CF  | blue | na |
| chrUn | 16167209 | 16168542 | 1334 SAT1_CF | blue | na |
| chrUn | 16168554 | 16169235 | 682 SAT1_CF  | blue | na |
| chrUn | 16169247 | 16169928 | 682 SAT1_CF  | blue | na |
| chrUn | 16169943 | 16170491 | 549 SAT1_CF  | blue | na |
| chrUn | 16170535 | 16170892 | 358 SAT1_CF  | blue | na |
| chrUn | 16170917 | 16172218 | 1302 SAT1_CF | blue | na |
| chrUn | 16172231 | 16172752 | 522 SAT1_CF  | blue | na |
| chrUn | 16172786 | 16173105 | 320 SAT1_CF  | blue | na |
| chrUn | 16173148 | 16174828 | 1681 SAT1_CF | blue | na |
| chrUn | 16174870 | 16175569 | 700 SAT1_CF  | blue | na |
| chrUn | 16175648 | 16176360 | 713 SAT1_CF  | blue | na |
| chrUn | 16177751 | 16178337 | 587 SAT1_CF  | blue | na |
| chrUn | 16178352 | 16180095 | 1744 SAT1_CF | blue | na |
| chrUn | 16180695 | 16181377 | 683 SAT1_CF  | blue | na |
| chrUn | 16181389 | 16183916 | 2528 SAT1_CF | blue | na |
| chrUn | 16183931 | 16184043 | 113 SAT1_CF  | blue | na |
| chrUn | 16184066 | 16184746 | 681 SAT1_CF  | blue | na |
| chrUn | 16184759 | 16185261 | 503 SAT1_CF  | blue | na |
| chrUn | 16185337 | 16186018 | 682 SAT1_CF  | blue | na |
| chrUn | 16186031 | 16186533 | 503 SAT1_CF  | blue | na |
| chrUn | 16186546 | 16188428 | 1883 SAT1_CF | blue | na |
| chrUn | 16188470 | 16188642 | 173 SAT1_CF  | blue | na |
| chrUn | 16188654 | 16189330 | 677 SAT1_CF  | blue | na |
| chrUn | 16189342 | 16190019 | 678 SAT1_CF  | blue | na |
| chrUn | 16190044 | 16190538 | 495 SAT1_CF  | blue | na |
| chrUn | 16190625 | 16190965 | 341 SAT1_CF  | blue | na |
| chrUn | 16192380 | 16192567 | 188 SAT1_CF  | blue | na |
| chrUn | 16192579 | 16193802 | 1224 SAT1_CF | blue | na |
| chrUn | 16193845 | 16194520 | 676 SAT1_CF  | blue | na |
| chrUn | 16194532 | 16195138 | 607 SAT1_CF  | blue | na |

|       |          |          |              |      |    |
|-------|----------|----------|--------------|------|----|
| chrUn | 16195150 | 16196567 | 1418 SAT1_CF | blue | na |
| chrUn | 16196594 | 16197213 | 620 SAT1_CF  | blue | na |
| chrUn | 16197260 | 16197934 | 675 SAT1_CF  | blue | na |
| chrUn | 16197946 | 16198620 | 675 SAT1_CF  | blue | na |
| chrUn | 16198642 | 16199160 | 519 SAT1_CF  | blue | na |
| chrUn | 16199228 | 16200140 | 913 SAT1_CF  | blue | na |
| chrUn | 16200184 | 16201000 | 817 SAT1_CF  | blue | na |
| chrUn | 16201042 | 16201902 | 861 SAT1_CF  | blue | na |
| chrUn | 16201914 | 16203382 | 1469 SAT1_CF | blue | na |
| chrUn | 16203452 | 16204054 | 603 SAT1_CF  | blue | na |
| chrUn | 16204076 | 16204617 | 542 SAT1_CF  | blue | na |
| chrUn | 16204659 | 16205521 | 863 SAT1_CF  | blue | na |
| chrUn | 16205533 | 16206087 | 555 SAT1_CF  | blue | na |
| chrUn | 16206109 | 16206216 | 108 SAT1_CF  | blue | na |
| chrUn | 16206230 | 16207413 | 1184 SAT1_CF | blue | na |
| chrUn | 16207493 | 16209529 | 2037 SAT1_CF | blue | na |
| chrUn | 16209572 | 16210013 | 442 SAT1_CF  | blue | na |
| chrUn | 16210155 | 16210676 | 522 SAT1_CF  | blue | na |
| chrUn | 16210702 | 16210859 | 158 SAT1_CF  | blue | na |
| chrUn | 16210874 | 16211397 | 524 SAT1_CF  | blue | na |
| chrUn | 16211442 | 16211967 | 526 SAT1_CF  | blue | na |
| chrUn | 16211981 | 16212700 | 720 SAT1_CF  | blue | na |
| chrUn | 16212743 | 16213986 | 1244 SAT1_CF | blue | na |
| chrUn | 16214042 | 16214117 | 76 SAT1_CF   | blue | na |
| chrUn | 16214129 | 16214629 | 501 SAT1_CF  | blue | na |
| chrUn | 16214684 | 16215623 | 940 SAT1_CF  | blue | na |
| chrUn | 16215668 | 16216027 | 360 SAT1_CF  | blue | na |
| chrUn | 16216050 | 16216589 | 540 SAT1_CF  | blue | na |
| chrUn | 16216631 | 16217965 | 1335 SAT1_CF | blue | na |
| chrUn | 16217978 | 16218867 | 890 SAT1_CF  | blue | na |
| chrUn | 16218879 | 16219575 | 697 SAT1_CF  | blue | na |
| chrUn | 16219587 | 16221096 | 1510 SAT1_CF | blue | na |
| chrUn | 16221138 | 16221687 | 550 SAT1_CF  | blue | na |
| chrUn | 16221813 | 16222380 | 568 SAT1_CF  | blue | na |
| chrUn | 16222392 | 16222910 | 519 SAT1_CF  | blue | na |
| chrUn | 16222939 | 16224975 | 2037 SAT1_CF | blue | na |
| chrUn | 16225018 | 16225693 | 676 SAT1_CF  | blue | na |
| chrUn | 16225705 | 16226311 | 607 SAT1_CF  | blue | na |
| chrUn | 16226324 | 16226845 | 522 SAT1_CF  | blue | na |
| chrUn | 16226860 | 16228688 | 1829 SAT1_CF | blue | na |
| chrUn | 16228731 | 16229277 | 547 SAT1_CF  | blue | na |
| chrUn | 16229306 | 16229408 | 103 SAT1_CF  | blue | na |

|       |          |          |              |      |    |
|-------|----------|----------|--------------|------|----|
| chrUn | 16229420 | 16229896 | 477 SAT1_CF  | blue | na |
| chrUn | 16229910 | 16230026 | 117 SAT1_CF  | blue | na |
| chrUn | 16230038 | 16230539 | 502 SAT1_CF  | blue | na |
| chrUn | 16230579 | 16233218 | 2640 SAT1_CF | blue | na |
| chrUn | 16233246 | 16235021 | 1776 SAT1_CF | blue | na |
| chrUn | 16235048 | 16235149 | 102 SAT1_CF  | blue | na |
| chrUn | 16235163 | 16235653 | 491 SAT1_CF  | blue | na |
| chrUn | 16235664 | 16236345 | 682 SAT1_CF  | blue | na |
| chrUn | 16236358 | 16236860 | 503 SAT1_CF  | blue | na |
| chrUn | 16236947 | 16237488 | 542 SAT1_CF  | blue | na |
| chrUn | 16237534 | 16238208 | 675 SAT1_CF  | blue | na |
| chrUn | 16238220 | 16238902 | 683 SAT1_CF  | blue | na |
| chrUn | 16238915 | 16239434 | 520 SAT1_CF  | blue | na |
| chrUn | 16239502 | 16240015 | 514 SAT1_CF  | blue | na |
| chrUn | 16240034 | 16240556 | 523 SAT1_CF  | blue | na |
| chrUn | 16240640 | 16241820 | 1181 SAT1_CF | blue | na |
| chrUn | 16241840 | 16241949 | 110 SAT1_CF  | blue | na |
| chrUn | 16241961 | 16242567 | 607 SAT1_CF  | blue | na |
| chrUn | 16242580 | 16243100 | 521 SAT1_CF  | blue | na |
| chrUn | 16243147 | 16244972 | 1826 SAT1_CF | blue | na |
| chrUn | 16244985 | 16246355 | 1371 SAT1_CF | blue | na |
| chrUn | 16246368 | 16247258 | 891 SAT1_CF  | blue | na |
| chrUn | 16247271 | 16247966 | 696 SAT1_CF  | blue | na |
| chrUn | 16247977 | 16248582 | 606 SAT1_CF  | blue | na |
| chrUn | 16248602 | 16249116 | 515 SAT1_CF  | blue | na |
| chrUn | 16249184 | 16249719 | 536 SAT1_CF  | blue | na |
| chrUn | 16251107 | 16251647 | 541 SAT1_CF  | blue | na |
| chrUn | 16251709 | 16252743 | 1035 SAT1_CF | blue | na |
| chrUn | 16252755 | 16253453 | 699 SAT1_CF  | blue | na |
| chrUn | 16253504 | 16254045 | 542 SAT1_CF  | blue | na |
| chrUn | 16254124 | 16254360 | 237 SAT1_CF  | blue | na |
| chrUn | 16254382 | 16254921 | 540 SAT1_CF  | blue | na |
| chrUn | 16254963 | 16255824 | 862 SAT1_CF  | blue | na |
| chrUn | 16255836 | 16256390 | 555 SAT1_CF  | blue | na |
| chrUn | 16256412 | 16256518 | 107 SAT1_CF  | blue | na |
| chrUn | 16256531 | 16257030 | 500 SAT1_CF  | blue | na |
| chrUn | 16257087 | 16259095 | 2009 SAT1_CF | blue | na |
| chrUn | 16259160 | 16260588 | 1429 SAT1_CF | blue | na |
| chrUn | 16260612 | 16261804 | 1193 SAT1_CF | blue | na |
| chrUn | 16261817 | 16263680 | 1864 SAT1_CF | blue | na |
| chrUn | 16263692 | 16264347 | 656 SAT1_CF  | blue | na |
| chrUn | 16264390 | 16264907 | 518 SAT1_CF  | blue | na |



|       |          |          |              |      |    |
|-------|----------|----------|--------------|------|----|
| chrUn | 16264936 | 16265789 | 854 SAT1_CF  | blue | na |
| chrUn | 16265802 | 16266324 | 523 SAT1_CF  | blue | na |
| chrUn | 16266371 | 16266528 | 158 SAT1_CF  | blue | na |
| chrUn | 16266541 | 16267061 | 521 SAT1_CF  | blue | na |
| chrUn | 16267079 | 16267982 | 904 SAT1_CF  | blue | na |
| chrUn | 16268031 | 16268884 | 854 SAT1_CF  | blue | na |
| chrUn | 16268896 | 16269477 | 582 SAT1_CF  | blue | na |
| chrUn | 16269557 | 16270423 | 867 SAT1_CF  | blue | na |
| chrUn | 16270458 | 16271000 | 543 SAT1_CF  | blue | na |
| chrUn | 16271042 | 16272732 | 1691 SAT1_CF | blue | na |
| chrUn | 16272812 | 16273336 | 525 SAT1_CF  | blue | na |
| chrUn | 16273356 | 16274224 | 869 SAT1_CF  | blue | na |
| chrUn | 16274252 | 16274848 | 597 SAT1_CF  | blue | na |
| chrUn | 16274891 | 16275948 | 1058 SAT1_CF | blue | na |
| chrUn | 16275967 | 16277052 | 1086 SAT1_CF | blue | na |
| chrUn | 16277097 | 16277254 | 158 SAT1_CF  | blue | na |
| chrUn | 16277269 | 16277793 | 525 SAT1_CF  | blue | na |
| chrUn | 16277836 | 16278510 | 675 SAT1_CF  | blue | na |
| chrUn | 16278524 | 16279207 | 684 SAT1_CF  | blue | na |
| chrUn | 16279219 | 16279720 | 502 SAT1_CF  | blue | na |
| chrUn | 16279786 | 16279922 | 137 SAT1_CF  | blue | na |
| chrUn | 16279937 | 16280977 | 1041 SAT1_CF | blue | na |
| chrUn | 16280991 | 16281685 | 695 SAT1_CF  | blue | na |
| chrUn | 16281727 | 16282983 | 1257 SAT1_CF | blue | na |
| chrUn | 16282996 | 16283885 | 890 SAT1_CF  | blue | na |
| chrUn | 16283897 | 16286193 | 2297 SAT1_CF | blue | na |
| chrUn | 16286235 | 16287094 | 860 SAT1_CF  | blue | na |
| chrUn | 16287109 | 16287624 | 516 SAT1_CF  | blue | na |
| chrUn | 16287653 | 16289689 | 2037 SAT1_CF | blue | na |
| chrUn | 16289732 | 16290406 | 675 SAT1_CF  | blue | na |
| chrUn | 16290418 | 16291024 | 607 SAT1_CF  | blue | na |
| chrUn | 16291037 | 16291558 | 522 SAT1_CF  | blue | na |
| chrUn | 16291573 | 16293401 | 1829 SAT1_CF | blue | na |
| chrUn | 16293444 | 16293990 | 547 SAT1_CF  | blue | na |
| chrUn | 16294019 | 16294121 | 103 SAT1_CF  | blue | na |
| chrUn | 16294133 | 16294663 | 531 SAT1_CF  | blue | na |
| chrUn | 16294675 | 16295177 | 503 SAT1_CF  | blue | na |
| chrUn | 16295264 | 16295805 | 542 SAT1_CF  | blue | na |
| chrUn | 16295851 | 16296519 | 669 SAT1_CF  | blue | na |
| chrUn | 16296537 | 16297141 | 605 SAT1_CF  | blue | na |
| chrUn | 16297154 | 16297674 | 521 SAT1_CF  | blue | na |
| chrUn | 16297721 | 16299545 | 1825 SAT1_CF | blue | na |

|       |          |          |              |      |    |
|-------|----------|----------|--------------|------|----|
| chrUn | 16299558 | 16300927 | 1370 SAT1_CF | blue | na |
| chrUn | 16300940 | 16301830 | 891 SAT1_CF  | blue | na |
| chrUn | 16301843 | 16302538 | 696 SAT1_CF  | blue | na |
| chrUn | 16302549 | 16303154 | 606 SAT1_CF  | blue | na |
| chrUn | 16303174 | 16303685 | 512 SAT1_CF  | blue | na |
| chrUn | 16303712 | 16304641 | 930 SAT1_CF  | blue | na |
| chrUn | 16304654 | 16305743 | 1090 SAT1_CF | blue | na |
| chrUn | 16305788 | 16306458 | 671 SAT1_CF  | blue | na |
| chrUn | 16306470 | 16308048 | 1579 SAT1_CF | blue | na |
| chrUn | 16308060 | 16308718 | 659 SAT1_CF  | blue | na |
| chrUn | 16308798 | 16310007 | 1210 SAT1_CF | blue | na |
| chrUn | 16310035 | 16310635 | 601 SAT1_CF  | blue | na |
| chrUn | 16310661 | 16311204 | 544 SAT1_CF  | blue | na |
| chrUn | 16311215 | 16311904 | 690 SAT1_CF  | blue | na |
| chrUn | 16311946 | 16312488 | 543 SAT1_CF  | blue | na |
| chrUn | 16312565 | 16312737 | 173 SAT1_CF  | blue | na |
| chrUn | 16312749 | 16313413 | 665 SAT1_CF  | blue | na |
| chrUn | 16313436 | 16315472 | 2037 SAT1_CF | blue | na |
| chrUn | 16315486 | 16315904 | 419 SAT1_CF  | blue | na |
| chrUn | 16315915 | 16317345 | 1431 SAT1_CF | blue | na |
| chrUn | 16317367 | 16318138 | 772 SAT1_CF  | blue | na |
| chrUn | 16318150 | 16318651 | 502 SAT1_CF  | blue | na |
| chrUn | 16318699 | 16319479 | 781 SAT1_CF  | blue | na |
| chrUn | 16319534 | 16320496 | 963 SAT1_CF  | blue | na |
| chrUn | 16320539 | 16321085 | 547 SAT1_CF  | blue | na |
| chrUn | 16321105 | 16321214 | 110 SAT1_CF  | blue | na |
| chrUn | 16321226 | 16322345 | 1120 SAT1_CF | blue | na |
| chrUn | 16322395 | 16322481 | 87 SAT1_CF   | blue | na |
| chrUn | 16322548 | 16323058 | 511 SAT1_CF  | blue | na |
| chrUn | 16323137 | 16325564 | 2428 SAT1_CF | blue | na |
| chrUn | 16325606 | 16326464 | 859 SAT1_CF  | blue | na |
| chrUn | 16326476 | 16326981 | 506 SAT1_CF  | blue | na |
| chrUn | 16327026 | 16327183 | 158 SAT1_CF  | blue | na |
| chrUn | 16327198 | 16328461 | 1264 SAT1_CF | blue | na |
| chrUn | 16328531 | 16329124 | 594 SAT1_CF  | blue | na |
| chrUn | 16329171 | 16329307 | 137 SAT1_CF  | blue | na |
| chrUn | 16329335 | 16330518 | 1184 SAT1_CF | blue | na |
| chrUn | 16330560 | 16331406 | 847 SAT1_CF  | blue | na |
| chrUn | 16331424 | 16332105 | 682 SAT1_CF  | blue | na |
| chrUn | 16332118 | 16332877 | 760 SAT1_CF  | blue | na |
| chrUn | 16332890 | 16333391 | 502 SAT1_CF  | blue | na |
| chrUn | 16333478 | 16333848 | 371 SAT1_CF  | blue | na |

|       |          |          |              |      |    |
|-------|----------|----------|--------------|------|----|
| chrUn | 16333870 | 16334678 | 809 SAT1_CF  | blue | na |
| chrUn | 16334720 | 16334892 | 173 SAT1_CF  | blue | na |
| chrUn | 16334904 | 16336276 | 1373 SAT1_CF | blue | na |
| chrUn | 16336289 | 16336766 | 478 SAT1_CF  | blue | na |
| chrUn | 16336824 | 16337009 | 186 SAT1_CF  | blue | na |
| chrUn | 16337190 | 16337392 | 203 SAT1_CF  | blue | na |
| chrUn | 16337435 | 16339223 | 1789 SAT1_CF | blue | na |
| chrUn | 16339235 | 16339867 | 633 SAT1_CF  | blue | na |
| chrUn | 16339937 | 16340478 | 542 SAT1_CF  | blue | na |
| chrUn | 16340543 | 16340808 | 266 SAT1_CF  | blue | na |
| chrUn | 16340888 | 16341923 | 1036 SAT1_CF | blue | na |
| chrUn | 16341965 | 16343022 | 1058 SAT1_CF | blue | na |
| chrUn | 16343064 | 16344517 | 1454 SAT1_CF | blue | na |
| chrUn | 16344543 | 16344700 | 158 SAT1_CF  | blue | na |
| chrUn | 16344728 | 16345986 | 1259 SAT1_CF | blue | na |
| chrUn | 16345999 | 16346109 | 111 SAT1_CF  | blue | na |
| chrUn | 16346127 | 16347040 | 914 SAT1_CF  | blue | na |
| chrUn | 16347065 | 16348397 | 1333 SAT1_CF | blue | na |
| chrUn | 16348411 | 16349170 | 760 SAT1_CF  | blue | na |
| chrUn | 16349182 | 16349863 | 682 SAT1_CF  | blue | na |
| chrUn | 16349876 | 16350396 | 521 SAT1_CF  | blue | na |
| chrUn | 16350422 | 16350578 | 157 SAT1_CF  | blue | na |
| chrUn | 16350606 | 16352947 | 2342 SAT1_CF | blue | na |
| chrUn | 16352969 | 16353672 | 704 SAT1_CF  | blue | na |
| chrUn | 16353685 | 16355974 | 2290 SAT1_CF | blue | na |
| chrUn | 16356016 | 16356881 | 866 SAT1_CF  | blue | na |
| chrUn | 16356893 | 16357560 | 668 SAT1_CF  | blue | na |
| chrUn | 16357588 | 16358060 | 473 SAT1_CF  | blue | na |
| chrUn | 16358116 | 16358191 | 76 SAT1_CF   | blue | na |
| chrUn | 16358202 | 16359460 | 1259 SAT1_CF | blue | na |
| chrUn | 16359506 | 16360725 | 1220 SAT1_CF | blue | na |
| chrUn | 16360737 | 16361281 | 545 SAT1_CF  | blue | na |
| chrUn | 16361398 | 16363242 | 1845 SAT1_CF | blue | na |
| chrUn | 16363255 | 16364005 | 751 SAT1_CF  | blue | na |
| chrUn | 16364018 | 16364520 | 503 SAT1_CF  | blue | na |
| chrUn | 16364558 | 16364962 | 405 SAT1_CF  | blue | na |
| chrUn | 16364975 | 16366948 | 1974 SAT1_CF | blue | na |
| chrUn | 16366991 | 16367537 | 547 SAT1_CF  | blue | na |
| chrUn | 16367580 | 16368254 | 675 SAT1_CF  | blue | na |
| chrUn | 16368266 | 16368948 | 683 SAT1_CF  | blue | na |
| chrUn | 16368968 | 16369481 | 514 SAT1_CF  | blue | na |
| chrUn | 16369502 | 16369892 | 391 SAT1_CF  | blue | na |

|       |          |          |              |      |    |
|-------|----------|----------|--------------|------|----|
| chrUn | 16369909 | 16370419 | 511 SAT1_CF  | blue | na |
| chrUn | 16370463 | 16370765 | 303 SAT1_CF  | blue | na |
| chrUn | 16370813 | 16372146 | 1334 SAT1_CF | blue | na |
| chrUn | 16372159 | 16372660 | 502 SAT1_CF  | blue | na |
| chrUn | 16372746 | 16372920 | 175 SAT1_CF  | blue | na |
| chrUn | 16373002 | 16374247 | 1246 SAT1_CF | blue | na |
| chrUn | 16374259 | 16374904 | 646 SAT1_CF  | blue | na |
| chrUn | 16374917 | 16375238 | 322 SAT1_CF  | blue | na |
| chrUn | 16375249 | 16375844 | 596 SAT1_CF  | blue | na |
| chrUn | 16375856 | 16376539 | 684 SAT1_CF  | blue | na |
| chrUn | 16376551 | 16378006 | 1456 SAT1_CF | blue | na |
| chrUn | 16378020 | 16379716 | 1697 SAT1_CF | blue | na |
| chrUn | 16379778 | 16380335 | 558 SAT1_CF  | blue | na |
| chrUn | 16380395 | 16381095 | 701 SAT1_CF  | blue | na |
| chrUn | 16381175 | 16381738 | 564 SAT1_CF  | blue | na |
| chrUn | 16381781 | 16383264 | 1484 SAT1_CF | blue | na |
| chrUn | 16383287 | 16383392 | 106 SAT1_CF  | blue | na |
| chrUn | 16383405 | 16383907 | 503 SAT1_CF  | blue | na |
| chrUn | 16383920 | 16384722 | 803 SAT1_CF  | blue | na |
| chrUn | 16384781 | 16384959 | 179 SAT1_CF  | blue | na |
| chrUn | 16385001 | 16385545 | 545 SAT1_CF  | blue | na |
| chrUn | 16385588 | 16386265 | 678 SAT1_CF  | blue | na |
| chrUn | 16386277 | 16386980 | 704 SAT1_CF  | blue | na |
| chrUn | 16386993 | 16387493 | 501 SAT1_CF  | blue | na |
| chrUn | 16387530 | 16387903 | 374 SAT1_CF  | blue | na |
| chrUn | 16387946 | 16389733 | 1788 SAT1_CF | blue | na |
| chrUn | 16389746 | 16391224 | 1479 SAT1_CF | blue | na |
| chrUn | 16391268 | 16391626 | 359 SAT1_CF  | blue | na |
| chrUn | 16391651 | 16392983 | 1333 SAT1_CF | blue | na |
| chrUn | 16392997 | 16393626 | 630 SAT1_CF  | blue | na |
| chrUn | 16393647 | 16393756 | 110 SAT1_CF  | blue | na |
| chrUn | 16393768 | 16394451 | 684 SAT1_CF  | blue | na |
| chrUn | 16394464 | 16394983 | 520 SAT1_CF  | blue | na |
| chrUn | 16395051 | 16396190 | 1140 SAT1_CF | blue | na |
| chrUn | 16396213 | 16396318 | 106 SAT1_CF  | blue | na |
| chrUn | 16396331 | 16396831 | 501 SAT1_CF  | blue | na |
| chrUn | 16396876 | 16397448 | 573 SAT1_CF  | blue | na |
| chrUn | 16397467 | 16398012 | 546 SAT1_CF  | blue | na |
| chrUn | 16398026 | 16398137 | 112 SAT1_CF  | blue | na |
| chrUn | 16398157 | 16398694 | 538 SAT1_CF  | blue | na |
| chrUn | 16398736 | 16399802 | 1067 SAT1_CF | blue | na |
| chrUn | 16399825 | 16399896 | 72 SAT1_CF   | blue | na |

|       |          |          |              |      |    |
|-------|----------|----------|--------------|------|----|
| chrUn | 16399909 | 16400964 | 1056 SAT1_CF | blue | na |
| chrUn | 16400985 | 16401094 | 110 SAT1_CF  | blue | na |
| chrUn | 16401106 | 16402571 | 1466 SAT1_CF | blue | na |
| chrUn | 16402638 | 16403602 | 965 SAT1_CF  | blue | na |
| chrUn | 16403645 | 16404191 | 547 SAT1_CF  | blue | na |
| chrUn | 16404213 | 16404887 | 675 SAT1_CF  | blue | na |
| chrUn | 16404910 | 16405016 | 107 SAT1_CF  | blue | na |
| chrUn | 16405028 | 16405311 | 284 SAT1_CF  | blue | na |
| chrUn | 16405324 | 16406497 | 1174 SAT1_CF | blue | na |
| chrUn | 16406523 | 16407182 | 660 SAT1_CF  | blue | na |
| chrUn | 16407263 | 16408483 | 1221 SAT1_CF | blue | na |
| chrUn | 16408527 | 16409899 | 1373 SAT1_CF | blue | na |
| chrUn | 16409911 | 16410393 | 483 SAT1_CF  | blue | na |
| chrUn | 16410453 | 16411447 | 995 SAT1_CF  | blue | na |
| chrUn | 16411527 | 16412061 | 535 SAT1_CF  | blue | na |
| chrUn | 16412116 | 16412742 | 627 SAT1_CF  | blue | na |
| chrUn | 16412788 | 16414156 | 1369 SAT1_CF | blue | na |
| chrUn | 16414169 | 16415060 | 892 SAT1_CF  | blue | na |
| chrUn | 16415080 | 16415574 | 495 SAT1_CF  | blue | na |
| chrUn | 16415612 | 16416178 | 567 SAT1_CF  | blue | na |
| chrUn | 16416213 | 16417354 | 1142 SAT1_CF | blue | na |
| chrUn | 16417429 | 16417746 | 318 SAT1_CF  | blue | na |
| chrUn | 16417758 | 16418445 | 688 SAT1_CF  | blue | na |
| chrUn | 16418489 | 16419470 | 982 SAT1_CF  | blue | na |
| chrUn | 16419512 | 16420187 | 676 SAT1_CF  | blue | na |
| chrUn | 16420199 | 16421317 | 1119 SAT1_CF | blue | na |
| chrUn | 16421357 | 16421930 | 574 SAT1_CF  | blue | na |
| chrUn | 16423319 | 16423684 | 366 SAT1_CF  | blue | na |
| chrUn | 16423727 | 16424884 | 1158 SAT1_CF | blue | na |
| chrUn | 16424897 | 16425398 | 502 SAT1_CF  | blue | na |
| chrUn | 16425447 | 16426179 | 733 SAT1_CF  | blue | na |
| chrUn | 16426258 | 16427929 | 1672 SAT1_CF | blue | na |
| chrUn | 16427953 | 16428043 | 91 SAT1_CF   | blue | na |
| chrUn | 16428070 | 16428572 | 503 SAT1_CF  | blue | na |
| chrUn | 16428617 | 16428774 | 158 SAT1_CF  | blue | na |
| chrUn | 16428802 | 16429961 | 1160 SAT1_CF | blue | na |
| chrUn | 16429973 | 16432518 | 2546 SAT1_CF | blue | na |
| chrUn | 16432545 | 16433045 | 501 SAT1_CF  | blue | na |
| chrUn | 16433081 | 16435766 | 2686 SAT1_CF | blue | na |
| chrUn | 16435778 | 16436241 | 464 SAT1_CF  | blue | na |
| chrUn | 16436311 | 16436856 | 546 SAT1_CF  | blue | na |
| chrUn | 16436878 | 16436984 | 107 SAT1_CF  | blue | na |

|       |          |          |              |      |    |
|-------|----------|----------|--------------|------|----|
| chrUn | 16436997 | 16438856 | 1860 SAT1_CF | blue | na |
| chrUn | 16438869 | 16439422 | 554 SAT1_CF  | blue | na |
| chrUn | 16439443 | 16439545 | 103 SAT1_CF  | blue | na |
| chrUn | 16439563 | 16440060 | 498 SAT1_CF  | blue | na |
| chrUn | 16440147 | 16441479 | 1333 SAT1_CF | blue | na |
| chrUn | 16441521 | 16442851 | 1331 SAT1_CF | blue | na |
| chrUn | 16442863 | 16443548 | 686 SAT1_CF  | blue | na |
| chrUn | 16443559 | 16444113 | 555 SAT1_CF  | blue | na |
| chrUn | 16444192 | 16444552 | 361 SAT1_CF  | blue | na |
| chrUn | 16444577 | 16445119 | 543 SAT1_CF  | blue | na |
| chrUn | 16445216 | 16445893 | 678 SAT1_CF  | blue | na |
| chrUn | 16445905 | 16446460 | 556 SAT1_CF  | blue | na |
| chrUn | 16446481 | 16446581 | 101 SAT1_CF  | blue | na |
| chrUn | 16446602 | 16447104 | 503 SAT1_CF  | blue | na |
| chrUn | 16447144 | 16447536 | 393 SAT1_CF  | blue | na |
| chrUn | 16447553 | 16448521 | 969 SAT1_CF  | blue | na |
| chrUn | 16448565 | 16449896 | 1332 SAT1_CF | blue | na |
| chrUn | 16449908 | 16450539 | 632 SAT1_CF  | blue | na |
| chrUn | 16450560 | 16450940 | 381 SAT1_CF  | blue | na |
| chrUn | 16450952 | 16451711 | 760 SAT1_CF  | blue | na |
| chrUn | 16451724 | 16452222 | 499 SAT1_CF  | blue | na |
| chrUn | 16452291 | 16452427 | 137 SAT1_CF  | blue | na |
| chrUn | 16452442 | 16452966 | 525 SAT1_CF  | blue | na |
| chrUn | 16452997 | 16453187 | 191 SAT1_CF  | blue | na |
| chrUn | 16453248 | 16454470 | 1223 SAT1_CF | blue | na |
| chrUn | 16454482 | 16455024 | 543 SAT1_CF  | blue | na |
| chrUn | 16455049 | 16456764 | 1716 SAT1_CF | blue | na |
| chrUn | 16456806 | 16457966 | 1161 SAT1_CF | blue | na |
| chrUn | 16457979 | 16459181 | 1203 SAT1_CF | blue | na |
| chrUn | 16459221 | 16459920 | 700 SAT1_CF  | blue | na |
| chrUn | 16459963 | 16460527 | 565 SAT1_CF  | blue | na |
| chrUn | 16460571 | 16461827 | 1257 SAT1_CF | blue | na |
| chrUn | 16461839 | 16462391 | 553 SAT1_CF  | blue | na |
| chrUn | 16462413 | 16462485 | 73 SAT1_CF   | blue | na |
| chrUn | 16462498 | 16463424 | 927 SAT1_CF  | blue | na |
| chrUn | 16463436 | 16464117 | 682 SAT1_CF  | blue | na |
| chrUn | 16464129 | 16464812 | 684 SAT1_CF  | blue | na |
| chrUn | 16464824 | 16465584 | 761 SAT1_CF  | blue | na |
| chrUn | 16465597 | 16465772 | 176 SAT1_CF  | blue | na |
| chrUn | 16465987 | 16466526 | 540 SAT1_CF  | blue | na |
| chrUn | 16466538 | 16467221 | 684 SAT1_CF  | blue | na |
| chrUn | 16467233 | 16467993 | 761 SAT1_CF  | blue | na |

|       |          |          |              |      |    |
|-------|----------|----------|--------------|------|----|
| chrUn | 16468006 | 16469700 | 1695 SAT1_CF | blue | na |
| chrUn | 16469723 | 16469829 | 107 SAT1_CF  | blue | na |
| chrUn | 16469843 | 16470323 | 481 SAT1_CF  | blue | na |
| chrUn | 16470379 | 16470564 | 186 SAT1_CF  | blue | na |
| chrUn | 16470744 | 16470946 | 203 SAT1_CF  | blue | na |
| chrUn | 16470989 | 16471598 | 610 SAT1_CF  | blue | na |
| chrUn | 16471631 | 16472767 | 1137 SAT1_CF | blue | na |
| chrUn | 16472789 | 16473421 | 633 SAT1_CF  | blue | na |
| chrUn | 16473492 | 16474035 | 544 SAT1_CF  | blue | na |
| chrUn | 16474054 | 16474367 | 314 SAT1_CF  | blue | na |
| chrUn | 16474447 | 16475011 | 565 SAT1_CF  | blue | na |
| chrUn | 16475054 | 16476261 | 1208 SAT1_CF | blue | na |
| chrUn | 16476305 | 16476841 | 537 SAT1_CF  | blue | na |
| chrUn | 16476878 | 16478621 | 1744 SAT1_CF | blue | na |
| chrUn | 16478664 | 16479341 | 678 SAT1_CF  | blue | na |
| chrUn | 16479353 | 16480056 | 704 SAT1_CF  | blue | na |
| chrUn | 16480069 | 16480590 | 522 SAT1_CF  | blue | na |
| chrUn | 16480658 | 16481013 | 356 SAT1_CF  | blue | na |
| chrUn | 16481026 | 16482809 | 1784 SAT1_CF | blue | na |
| chrUn | 16482826 | 16484018 | 1193 SAT1_CF | blue | na |
| chrUn | 16484071 | 16484604 | 534 SAT1_CF  | blue | na |
| chrUn | 16484618 | 16485169 | 552 SAT1_CF  | blue | na |
| chrUn | 16485212 | 16486894 | 1683 SAT1_CF | blue | na |
| chrUn | 16486906 | 16488690 | 1785 SAT1_CF | blue | na |
| chrUn | 16488703 | 16489205 | 503 SAT1_CF  | blue | na |
| chrUn | 16489245 | 16489647 | 403 SAT1_CF  | blue | na |
| chrUn | 16489660 | 16491469 | 1810 SAT1_CF | blue | na |
| chrUn | 16491489 | 16492958 | 1470 SAT1_CF | blue | na |
| chrUn | 16492990 | 16493991 | 1002 SAT1_CF | blue | na |
| chrUn | 16494034 | 16494710 | 677 SAT1_CF  | blue | na |
| chrUn | 16494722 | 16494945 | 224 SAT1_CF  | blue | na |
| chrUn | 16495129 | 16496650 | 1522 SAT1_CF | blue | na |
| chrUn | 16496693 | 16497372 | 680 SAT1_CF  | blue | na |
| chrUn | 16497384 | 16497938 | 555 SAT1_CF  | blue | na |
| chrUn | 16497993 | 16498624 | 632 SAT1_CF  | blue | na |
| chrUn | 16498692 | 16499654 | 963 SAT1_CF  | blue | na |
| chrUn | 16499768 | 16500548 | 781 SAT1_CF  | blue | na |
| chrUn | 16500590 | 16501450 | 861 SAT1_CF  | blue | na |
| chrUn | 16501463 | 16502020 | 558 SAT1_CF  | blue | na |
| chrUn | 16502040 | 16502148 | 109 SAT1_CF  | blue | na |
| chrUn | 16502161 | 16502681 | 521 SAT1_CF  | blue | na |
| chrUn | 16502698 | 16502883 | 186 SAT1_CF  | blue | na |

|       |          |          |              |      |    |
|-------|----------|----------|--------------|------|----|
| chrUn | 16503065 | 16503230 | 166 SAT1_CF  | blue | na |
| chrUn | 16503272 | 16503819 | 548 SAT1_CF  | blue | na |
| chrUn | 16503899 | 16504671 | 773 SAT1_CF  | blue | na |
| chrUn | 16504751 | 16505275 | 525 SAT1_CF  | blue | na |
| chrUn | 16505322 | 16505789 | 468 SAT1_CF  | blue | na |
| chrUn | 16505805 | 16506344 | 540 SAT1_CF  | blue | na |
| chrUn | 16506424 | 16507389 | 966 SAT1_CF  | blue | na |
| chrUn | 16507432 | 16508094 | 663 SAT1_CF  | blue | na |
| chrUn | 16508107 | 16508300 | 194 SAT1_CF  | blue | na |
| chrUn | 16508331 | 16509003 | 673 SAT1_CF  | blue | na |
| chrUn | 16509015 | 16510590 | 1576 SAT1_CF | blue | na |
| chrUn | 16510651 | 16511327 | 677 SAT1_CF  | blue | na |
| chrUn | 16511339 | 16512023 | 685 SAT1_CF  | blue | na |
| chrUn | 16512036 | 16512538 | 503 SAT1_CF  | blue | na |
| chrUn | 16512624 | 16512979 | 356 SAT1_CF  | blue | na |
| chrUn | 16512990 | 16513538 | 549 SAT1_CF  | blue | na |
| chrUn | 16513615 | 16514374 | 760 SAT1_CF  | blue | na |
| chrUn | 16514426 | 16514614 | 189 SAT1_CF  | blue | na |
| chrUn | 16514627 | 16515148 | 522 SAT1_CF  | blue | na |
| chrUn | 16515215 | 16516174 | 960 SAT1_CF  | blue | na |
| chrUn | 16516217 | 16516894 | 678 SAT1_CF  | blue | na |
| chrUn | 16516906 | 16517588 | 683 SAT1_CF  | blue | na |
| chrUn | 16517601 | 16518301 | 701 SAT1_CF  | blue | na |
| chrUn | 16518329 | 16518839 | 511 SAT1_CF  | blue | na |
| chrUn | 16518908 | 16519631 | 724 SAT1_CF  | blue | na |
| chrUn | 16519643 | 16520333 | 691 SAT1_CF  | blue | na |
| chrUn | 16520376 | 16520897 | 522 SAT1_CF  | blue | na |
| chrUn | 16520931 | 16522005 | 1075 SAT1_CF | blue | na |
| chrUn | 16522048 | 16522592 | 545 SAT1_CF  | blue | na |
| chrUn | 16522613 | 16522721 | 109 SAT1_CF  | blue | na |
| chrUn | 16522734 | 16523253 | 520 SAT1_CF  | blue | na |
| chrUn | 16523291 | 16523653 | 363 SAT1_CF  | blue | na |
| chrUn | 16523690 | 16524294 | 605 SAT1_CF  | blue | na |
| chrUn | 16524316 | 16525994 | 1679 SAT1_CF | blue | na |
| chrUn | 16526007 | 16526528 | 522 SAT1_CF  | blue | na |
| chrUn | 16526545 | 16527225 | 681 SAT1_CF  | blue | na |
| chrUn | 16527267 | 16528125 | 859 SAT1_CF  | blue | na |
| chrUn | 16528345 | 16528877 | 533 SAT1_CF  | blue | na |
| chrUn | 16528904 | 16530091 | 1188 SAT1_CF | blue | na |
| chrUn | 16530103 | 16530657 | 555 SAT1_CF  | blue | na |
| chrUn | 16530682 | 16530786 | 105 SAT1_CF  | blue | na |
| chrUn | 16530799 | 16531672 | 874 SAT1_CF  | blue | na |



|       |          |          |              |      |    |
|-------|----------|----------|--------------|------|----|
| chrUn | 16531733 | 16532409 | 677 SAT1_CF  | blue | na |
| chrUn | 16532421 | 16532994 | 574 SAT1_CF  | blue | na |
| chrUn | 16533019 | 16533339 | 321 SAT1_CF  | blue | na |
| chrUn | 16533383 | 16534094 | 712 SAT1_CF  | blue | na |
| chrUn | 16534105 | 16534598 | 494 SAT1_CF  | blue | na |
| chrUn | 16534611 | 16535871 | 1261 SAT1_CF | blue | na |
| chrUn | 16535948 | 16536786 | 839 SAT1_CF  | blue | na |
| chrUn | 16536821 | 16537301 | 481 SAT1_CF  | blue | na |
| chrUn | 16537327 | 16537922 | 596 SAT1_CF  | blue | na |
| chrUn | 16538190 | 16539383 | 1194 SAT1_CF | blue | na |
| chrUn | 16539395 | 16540310 | 916 SAT1_CF  | blue | na |
| chrUn | 16540323 | 16541004 | 682 SAT1_CF  | blue | na |
| chrUn | 16541024 | 16541537 | 514 SAT1_CF  | blue | na |
| chrUn | 16541554 | 16542451 | 898 SAT1_CF  | blue | na |
| chrUn | 16542472 | 16542935 | 464 SAT1_CF  | blue | na |
| chrUn | 16542978 | 16544194 | 1217 SAT1_CF | blue | na |
| chrUn | 16544206 | 16544903 | 698 SAT1_CF  | blue | na |
| chrUn | 16544921 | 16545423 | 503 SAT1_CF  | blue | na |
| chrUn | 16545463 | 16545864 | 402 SAT1_CF  | blue | na |
| chrUn | 16546934 | 16548045 | 1112 SAT1_CF | blue | na |
| chrUn | 16548059 | 16548947 | 889 SAT1_CF  | blue | na |
| chrUn | 16548959 | 16549636 | 678 SAT1_CF  | blue | na |
| chrUn | 16549661 | 16550155 | 495 SAT1_CF  | blue | na |
| chrUn | 16550193 | 16550759 | 567 SAT1_CF  | blue | na |
| chrUn | 16550829 | 16551346 | 518 SAT1_CF  | blue | na |
| chrUn | 16551365 | 16551935 | 571 SAT1_CF  | blue | na |
| chrUn | 16552010 | 16552327 | 318 SAT1_CF  | blue | na |
| chrUn | 16552407 | 16553024 | 618 SAT1_CF  | blue | na |
| chrUn | 16553035 | 16554015 | 981 SAT1_CF  | blue | na |
| chrUn | 16554057 | 16554732 | 676 SAT1_CF  | blue | na |
| chrUn | 16554744 | 16555863 | 1120 SAT1_CF | blue | na |
| chrUn | 16555903 | 16556476 | 574 SAT1_CF  | blue | na |
| chrUn | 16557872 | 16559419 | 1548 SAT1_CF | blue | na |
| chrUn | 16559432 | 16559953 | 522 SAT1_CF  | blue | na |
| chrUn | 16559979 | 16560087 | 109 SAT1_CF  | blue | na |
| chrUn | 16560098 | 16561752 | 1655 SAT1_CF | blue | na |
| chrUn | 16561797 | 16561954 | 158 SAT1_CF  | blue | na |
| chrUn | 16561969 | 16562492 | 524 SAT1_CF  | blue | na |
| chrUn | 16562572 | 16564020 | 1449 SAT1_CF | blue | na |
| chrUn | 16564040 | 16565169 | 1130 SAT1_CF | blue | na |
| chrUn | 16565190 | 16566123 | 934 SAT1_CF  | blue | na |
| chrUn | 16566157 | 16566677 | 521 SAT1_CF  | blue | na |

|       |          |          |              |      |    |
|-------|----------|----------|--------------|------|----|
| chrUn | 16566691 | 16567231 | 541 SAT1_CF  | blue | na |
| chrUn | 16567274 | 16567818 | 545 SAT1_CF  | blue | na |
| chrUn | 16567837 | 16567946 | 110 SAT1_CF  | blue | na |
| chrUn | 16567958 | 16568717 | 760 SAT1_CF  | blue | na |
| chrUn | 16568730 | 16569230 | 501 SAT1_CF  | blue | na |
| chrUn | 16569317 | 16569875 | 559 SAT1_CF  | blue | na |
| chrUn | 16569905 | 16570531 | 627 SAT1_CF  | blue | na |
| chrUn | 16570579 | 16571946 | 1368 SAT1_CF | blue | na |
| chrUn | 16571959 | 16572460 | 502 SAT1_CF  | blue | na |
| chrUn | 16572498 | 16572902 | 405 SAT1_CF  | blue | na |
| chrUn | 16572915 | 16574693 | 1779 SAT1_CF | blue | na |
| chrUn | 16574744 | 16575218 | 475 SAT1_CF  | blue | na |
| chrUn | 16575280 | 16575678 | 399 SAT1_CF  | blue | na |
| chrUn | 16575690 | 16576236 | 547 SAT1_CF  | blue | na |
| chrUn | 16576350 | 16577314 | 965 SAT1_CF  | blue | na |
| chrUn | 16577358 | 16578033 | 676 SAT1_CF  | blue | na |
| chrUn | 16578046 | 16578604 | 559 SAT1_CF  | blue | na |
| chrUn | 16578624 | 16578732 | 109 SAT1_CF  | blue | na |
| chrUn | 16578745 | 16579265 | 521 SAT1_CF  | blue | na |
| chrUn | 16579282 | 16579467 | 186 SAT1_CF  | blue | na |
| chrUn | 16579649 | 16579814 | 166 SAT1_CF  | blue | na |
| chrUn | 16579856 | 16581254 | 1399 SAT1_CF | blue | na |
| chrUn | 16581334 | 16583620 | 2287 SAT1_CF | blue | na |
| chrUn | 16583687 | 16584466 | 780 SAT1_CF  | blue | na |
| chrUn | 16584524 | 16586593 | 2070 SAT1_CF | blue | na |
| chrUn | 16586658 | 16587631 | 974 SAT1_CF  | blue | na |
| chrUn | 16587648 | 16588799 | 1152 SAT1_CF | blue | na |
| chrUn | 16588812 | 16590076 | 1265 SAT1_CF | blue | na |
| chrUn | 16590102 | 16590259 | 158 SAT1_CF  | blue | na |
| chrUn | 16590274 | 16590798 | 525 SAT1_CF  | blue | na |
| chrUn | 16590877 | 16591692 | 816 SAT1_CF  | blue | na |
| chrUn | 16591723 | 16593181 | 1459 SAT1_CF | blue | na |
| chrUn | 16593193 | 16593876 | 684 SAT1_CF  | blue | na |
| chrUn | 16593890 | 16594390 | 501 SAT1_CF  | blue | na |
| chrUn | 16594458 | 16594594 | 137 SAT1_CF  | blue | na |
| chrUn | 16594627 | 16595133 | 507 SAT1_CF  | blue | na |
| chrUn | 16595162 | 16599897 | 4736 SAT1_CF | blue | na |
| chrUn | 16599923 | 16600080 | 158 SAT1_CF  | blue | na |
| chrUn | 16600095 | 16601420 | 1326 SAT1_CF | blue | na |
| chrUn | 16601443 | 16601914 | 472 SAT1_CF  | blue | na |
| chrUn | 16601975 | 16602155 | 181 SAT1_CF  | blue | na |
| chrUn | 16602335 | 16602537 | 203 SAT1_CF  | blue | na |

|       |          |          |              |      |    |
|-------|----------|----------|--------------|------|----|
| chrUn | 16602580 | 16603127 | 548 SAT1_CF  | blue | na |
| chrUn | 16603171 | 16604139 | 969 SAT1_CF  | blue | na |
| chrUn | 16604182 | 16604648 | 467 SAT1_CF  | blue | na |
| chrUn | 16604836 | 16605774 | 939 SAT1_CF  | blue | na |
| chrUn | 16605787 | 16606288 | 502 SAT1_CF  | blue | na |
| chrUn | 16606331 | 16607283 | 953 SAT1_CF  | blue | na |
| chrUn | 16607338 | 16608959 | 1622 SAT1_CF | blue | na |
| chrUn | 16609065 | 16609418 | 354 SAT1_CF  | blue | na |
| chrUn | 16609433 | 16610397 | 965 SAT1_CF  | blue | na |
| chrUn | 16610440 | 16611764 | 1325 SAT1_CF | blue | na |
| chrUn | 16611784 | 16612428 | 645 SAT1_CF  | blue | na |
| chrUn | 16612441 | 16613188 | 748 SAT1_CF  | blue | na |
| chrUn | 16613215 | 16613716 | 502 SAT1_CF  | blue | na |
| chrUn | 16613782 | 16613918 | 137 SAT1_CF  | blue | na |
| chrUn | 16613933 | 16614457 | 525 SAT1_CF  | blue | na |
| chrUn | 16614500 | 16615025 | 526 SAT1_CF  | blue | na |
| chrUn | 16615069 | 16615589 | 521 SAT1_CF  | blue | na |
| chrUn | 16615605 | 16615740 | 136 SAT1_CF  | blue | na |
| chrUn | 16615754 | 16616747 | 994 SAT1_CF  | blue | na |
| chrUn | 16616778 | 16617330 | 553 SAT1_CF  | blue | na |
| chrUn | 16617417 | 16617772 | 356 SAT1_CF  | blue | na |
| chrUn | 16617785 | 16618294 | 510 SAT1_CF  | blue | na |
| chrUn | 16618373 | 16619412 | 1040 SAT1_CF | blue | na |
| chrUn | 16619456 | 16621758 | 2303 SAT1_CF | blue | na |
| chrUn | 16621771 | 16622292 | 522 SAT1_CF  | blue | na |
| chrUn | 16622359 | 16622493 | 135 SAT1_CF  | blue | na |
| chrUn | 16622675 | 16622911 | 237 SAT1_CF  | blue | na |
| chrUn | 16622922 | 16625841 | 2920 SAT1_CF | blue | na |
| chrUn | 16625862 | 16626820 | 959 SAT1_CF  | blue | na |
| chrUn | 16626864 | 16627193 | 330 SAT1_CF  | blue | na |
| chrUn | 16627217 | 16627862 | 646 SAT1_CF  | blue | na |
| chrUn | 16627874 | 16629243 | 1370 SAT1_CF | blue | na |
| chrUn | 16629256 | 16629755 | 500 SAT1_CF  | blue | na |
| chrUn | 16629844 | 16630359 | 516 SAT1_CF  | blue | na |
| chrUn | 16630393 | 16631824 | 1432 SAT1_CF | blue | na |
| chrUn | 16631851 | 16632331 | 481 SAT1_CF  | blue | na |
| chrUn | 16632387 | 16632757 | 371 SAT1_CF  | blue | na |
| chrUn | 16632802 | 16633772 | 971 SAT1_CF  | blue | na |
| chrUn | 16633816 | 16635014 | 1199 SAT1_CF | blue | na |
| chrUn | 16635030 | 16635427 | 398 SAT1_CF  | blue | na |
| chrUn | 16635441 | 16636070 | 630 SAT1_CF  | blue | na |
| chrUn | 16636091 | 16636817 | 727 SAT1_CF  | blue | na |

|       |          |          |              |      |    |
|-------|----------|----------|--------------|------|----|
| chrUn | 16636830 | 16637350 | 521 SAT1_CF  | blue | na |
| chrUn | 16637418 | 16639993 | 2576 SAT1_CF | blue | na |
| chrUn | 16640013 | 16640508 | 496 SAT1_CF  | blue | na |
| chrUn | 16640594 | 16640768 | 175 SAT1_CF  | blue | na |
| chrUn | 16640849 | 16642094 | 1246 SAT1_CF | blue | na |
| chrUn | 16642106 | 16642658 | 553 SAT1_CF  | blue | na |
| chrUn | 16642679 | 16643692 | 1014 SAT1_CF | blue | na |
| chrUn | 16643704 | 16644375 | 672 SAT1_CF  | blue | na |
| chrUn | 16644398 | 16644899 | 502 SAT1_CF  | blue | na |
| chrUn | 16644965 | 16645101 | 137 SAT1_CF  | blue | na |
| chrUn | 16645129 | 16645677 | 549 SAT1_CF  | blue | na |
| chrUn | 16645761 | 16646830 | 1070 SAT1_CF | blue | na |
| chrUn | 16646872 | 16647729 | 858 SAT1_CF  | blue | na |
| chrUn | 16647741 | 16648423 | 683 SAT1_CF  | blue | na |
| chrUn | 16648436 | 16648934 | 499 SAT1_CF  | blue | na |
| chrUn | 16648982 | 16649378 | 397 SAT1_CF  | blue | na |
| chrUn | 16649391 | 16649924 | 534 SAT1_CF  | blue | na |
| chrUn | 16650014 | 16650978 | 965 SAT1_CF  | blue | na |
| chrUn | 16651021 | 16651697 | 677 SAT1_CF  | blue | na |
| chrUn | 16651709 | 16652950 | 1242 SAT1_CF | blue | na |
| chrUn | 16652982 | 16653600 | 619 SAT1_CF  | blue | na |
| chrUn | 16653687 | 16654040 | 354 SAT1_CF  | blue | na |
| chrUn | 16654055 | 16655382 | 1328 SAT1_CF | blue | na |
| chrUn | 16655394 | 16656229 | 836 SAT1_CF  | blue | na |
| chrUn | 16656247 | 16656747 | 501 SAT1_CF  | blue | na |
| chrUn | 16656800 | 16657151 | 352 SAT1_CF  | blue | na |
| chrUn | 16657164 | 16657684 | 521 SAT1_CF  | blue | na |
| chrUn | 16657715 | 16658105 | 391 SAT1_CF  | blue | na |
| chrUn | 16658175 | 16659399 | 1225 SAT1_CF | blue | na |
| chrUn | 16659416 | 16660002 | 587 SAT1_CF  | blue | na |
| chrUn | 16660167 | 16660279 | 113 SAT1_CF  | blue | na |
| chrUn | 16660292 | 16660793 | 502 SAT1_CF  | blue | na |
| chrUn | 16660833 | 16661202 | 370 SAT1_CF  | blue | na |
| chrUn | 16661245 | 16662895 | 1651 SAT1_CF | blue | na |
| chrUn | 16662915 | 16664348 | 1434 SAT1_CF | blue | na |
| chrUn | 16664375 | 16664877 | 503 SAT1_CF  | blue | na |
| chrUn | 16664963 | 16665850 | 888 SAT1_CF  | blue | na |
| chrUn | 16665870 | 16666937 | 1068 SAT1_CF | blue | na |
| chrUn | 16666950 | 16667959 | 1010 SAT1_CF | blue | na |
| chrUn | 16667971 | 16668602 | 632 SAT1_CF  | blue | na |
| chrUn | 16668625 | 16668730 | 106 SAT1_CF  | blue | na |
| chrUn | 16668743 | 16670439 | 1697 SAT1_CF | blue | na |

|       |          |          |              |      |    |
|-------|----------|----------|--------------|------|----|
| chrUn | 16670462 | 16670567 | 106 SAT1_CF  | blue | na |
| chrUn | 16670580 | 16671100 | 521 SAT1_CF  | blue | na |
| chrUn | 16671117 | 16671302 | 186 SAT1_CF  | blue | na |
| chrUn | 16671483 | 16671685 | 203 SAT1_CF  | blue | na |
| chrUn | 16671728 | 16674351 | 2624 SAT1_CF | blue | na |
| chrUn | 16674395 | 16675636 | 1242 SAT1_CF | blue | na |
| chrUn | 16675715 | 16676677 | 963 SAT1_CF  | blue | na |
| chrUn | 16676720 | 16677399 | 680 SAT1_CF  | blue | na |
| chrUn | 16677411 | 16678084 | 674 SAT1_CF  | blue | na |
| chrUn | 16678105 | 16678606 | 502 SAT1_CF  | blue | na |
| chrUn | 16678651 | 16678808 | 158 SAT1_CF  | blue | na |
| chrUn | 16678873 | 16679422 | 550 SAT1_CF  | blue | na |
| chrUn | 16679482 | 16679660 | 179 SAT1_CF  | blue | na |
| chrUn | 16679702 | 16680246 | 545 SAT1_CF  | blue | na |
| chrUn | 16680289 | 16680965 | 677 SAT1_CF  | blue | na |
| chrUn | 16680977 | 16681680 | 704 SAT1_CF  | blue | na |
| chrUn | 16681693 | 16682192 | 500 SAT1_CF  | blue | na |
| chrUn | 16682234 | 16684431 | 2198 SAT1_CF | blue | na |
| chrUn | 16684444 | 16685468 | 1025 SAT1_CF | blue | na |
| chrUn | 16685513 | 16686327 | 815 SAT1_CF  | blue | na |
| chrUn | 16686369 | 16687102 | 734 SAT1_CF  | blue | na |
| chrUn | 16687123 | 16687230 | 108 SAT1_CF  | blue | na |
| chrUn | 16687242 | 16687924 | 683 SAT1_CF  | blue | na |
| chrUn | 16687937 | 16688619 | 683 SAT1_CF  | blue | na |
| chrUn | 16688639 | 16689132 | 494 SAT1_CF  | blue | na |
| chrUn | 16689174 | 16689576 | 403 SAT1_CF  | blue | na |
| chrUn | 16689587 | 16690197 | 611 SAT1_CF  | blue | na |
| chrUn | 16690217 | 16691221 | 1005 SAT1_CF | blue | na |
| chrUn | 16691264 | 16691939 | 676 SAT1_CF  | blue | na |
| chrUn | 16691951 | 16692554 | 604 SAT1_CF  | blue | na |
| chrUn | 16692567 | 16693068 | 502 SAT1_CF  | blue | na |
| chrUn | 16693108 | 16693510 | 403 SAT1_CF  | blue | na |
| chrUn | 16693523 | 16694706 | 1184 SAT1_CF | blue | na |
| chrUn | 16694772 | 16696209 | 1438 SAT1_CF | blue | na |
| chrUn | 16696253 | 16696800 | 548 SAT1_CF  | blue | na |
| chrUn | 16696821 | 16696930 | 110 SAT1_CF  | blue | na |
| chrUn | 16696942 | 16697982 | 1041 SAT1_CF | blue | na |
| chrUn | 16697994 | 16698754 | 761 SAT1_CF  | blue | na |
| chrUn | 16698768 | 16699269 | 502 SAT1_CF  | blue | na |
| chrUn | 16699335 | 16699471 | 137 SAT1_CF  | blue | na |
| chrUn | 16699486 | 16700009 | 524 SAT1_CF  | blue | na |
| chrUn | 16700051 | 16701640 | 1590 SAT1_CF | blue | na |

|       |          |          |              |      |    |
|-------|----------|----------|--------------|------|----|
| chrUn | 16701683 | 16702870 | 1188 SAT1_CF | blue | na |
| chrUn | 16702910 | 16704767 | 1858 SAT1_CF | blue | na |
| chrUn | 16704809 | 16705516 | 708 SAT1_CF  | blue | na |
| chrUn | 16705529 | 16706283 | 755 SAT1_CF  | blue | na |
| chrUn | 16706296 | 16707993 | 1698 SAT1_CF | blue | na |
| chrUn | 16708055 | 16708615 | 561 SAT1_CF  | blue | na |
| chrUn | 16708648 | 16708858 | 211 SAT1_CF  | blue | na |
| chrUn | 16709037 | 16709239 | 203 SAT1_CF  | blue | na |
| chrUn | 16709282 | 16710940 | 1659 SAT1_CF | blue | na |
| chrUn | 16710960 | 16711069 | 110 SAT1_CF  | blue | na |
| chrUn | 16711081 | 16711634 | 554 SAT1_CF  | blue | na |
| chrUn | 16711689 | 16712277 | 589 SAT1_CF  | blue | na |
| chrUn | 16712290 | 16713239 | 950 SAT1_CF  | blue | na |
| chrUn | 16713372 | 16713916 | 545 SAT1_CF  | blue | na |
| chrUn | 16713959 | 16715411 | 1453 SAT1_CF | blue | na |
| chrUn | 16715422 | 16716104 | 683 SAT1_CF  | blue | na |
| chrUn | 16716117 | 16716618 | 502 SAT1_CF  | blue | na |
| chrUn | 16716663 | 16716820 | 158 SAT1_CF  | blue | na |
| chrUn | 16716848 | 16717360 | 513 SAT1_CF  | blue | na |
| chrUn | 16717391 | 16717911 | 521 SAT1_CF  | blue | na |
| chrUn | 16718027 | 16718382 | 356 SAT1_CF  | blue | na |
| chrUn | 16718396 | 16720744 | 2349 SAT1_CF | blue | na |
| chrUn | 16720756 | 16721436 | 681 SAT1_CF  | blue | na |
| chrUn | 16721449 | 16722052 | 604 SAT1_CF  | blue | na |
| chrUn | 16722064 | 16722696 | 633 SAT1_CF  | blue | na |
| chrUn | 16722753 | 16723791 | 1039 SAT1_CF | blue | na |
| chrUn | 16723833 | 16723949 | 117 SAT1_CF  | blue | na |
| chrUn | 16723998 | 16724672 | 675 SAT1_CF  | blue | na |
| chrUn | 16724684 | 16725230 | 547 SAT1_CF  | blue | na |
| chrUn | 16725259 | 16725499 | 241 SAT1_CF  | blue | na |
| chrUn | 16725527 | 16726039 | 513 SAT1_CF  | blue | na |
| chrUn | 16726082 | 16727158 | 1077 SAT1_CF | blue | na |
| chrUn | 16727201 | 16728061 | 861 SAT1_CF  | blue | na |
| chrUn | 16728073 | 16728632 | 560 SAT1_CF  | blue | na |
| chrUn | 16728652 | 16728760 | 109 SAT1_CF  | blue | na |
| chrUn | 16728773 | 16729293 | 521 SAT1_CF  | blue | na |
| chrUn | 16729310 | 16729495 | 186 SAT1_CF  | blue | na |
| chrUn | 16729677 | 16729842 | 166 SAT1_CF  | blue | na |
| chrUn | 16729884 | 16732454 | 2571 SAT1_CF | blue | na |
| chrUn | 16732498 | 16733172 | 675 SAT1_CF  | blue | na |
| chrUn | 16733184 | 16734710 | 1527 SAT1_CF | blue | na |
| chrUn | 16734753 | 16736125 | 1373 SAT1_CF | blue | na |

|       |          |          |              |      |    |
|-------|----------|----------|--------------|------|----|
| chrUn | 16736138 | 16736639 | 502 SAT1_CF  | blue | na |
| chrUn | 16736682 | 16737679 | 998 SAT1_CF  | blue | na |
| chrUn | 16737711 | 16739310 | 1600 SAT1_CF | blue | na |
| chrUn | 16739374 | 16739769 | 396 SAT1_CF  | blue | na |
| chrUn | 16739784 | 16740302 | 519 SAT1_CF  | blue | na |
| chrUn | 16740315 | 16741406 | 1092 SAT1_CF | blue | na |
| chrUn | 16741449 | 16742122 | 674 SAT1_CF  | blue | na |
| chrUn | 16742134 | 16742818 | 685 SAT1_CF  | blue | na |
| chrUn | 16742830 | 16744157 | 1328 SAT1_CF | blue | na |
| chrUn | 16744236 | 16744596 | 361 SAT1_CF  | blue | na |
| chrUn | 16744621 | 16745163 | 543 SAT1_CF  | blue | na |
| chrUn | 16745260 | 16745936 | 677 SAT1_CF  | blue | na |
| chrUn | 16745948 | 16746503 | 556 SAT1_CF  | blue | na |
| chrUn | 16746526 | 16746632 | 107 SAT1_CF  | blue | na |
| chrUn | 16746645 | 16747146 | 502 SAT1_CF  | blue | na |
| chrUn | 16747186 | 16748082 | 897 SAT1_CF  | blue | na |
| chrUn | 16748114 | 16748449 | 336 SAT1_CF  | blue | na |
| chrUn | 16748497 | 16749142 | 646 SAT1_CF  | blue | na |
| chrUn | 16749154 | 16749829 | 676 SAT1_CF  | blue | na |
| chrUn | 16749842 | 16750362 | 521 SAT1_CF  | blue | na |
| chrUn | 16750388 | 16750495 | 108 SAT1_CF  | blue | na |
| chrUn | 16750558 | 16751084 | 527 SAT1_CF  | blue | na |
| chrUn | 16751114 | 16751930 | 817 SAT1_CF  | blue | na |
| chrUn | 16751942 | 16752494 | 553 SAT1_CF  | blue | na |
| chrUn | 16752516 | 16752588 | 73 SAT1_CF   | blue | na |
| chrUn | 16752601 | 16753529 | 929 SAT1_CF  | blue | na |
| chrUn | 16753541 | 16754222 | 682 SAT1_CF  | blue | na |
| chrUn | 16754234 | 16754802 | 569 SAT1_CF  | blue | na |
| chrUn | 16754845 | 16756540 | 1696 SAT1_CF | blue | na |
| chrUn | 16756563 | 16756668 | 106 SAT1_CF  | blue | na |
| chrUn | 16756681 | 16757161 | 481 SAT1_CF  | blue | na |
| chrUn | 16757194 | 16757402 | 209 SAT1_CF  | blue | na |
| chrUn | 16757583 | 16757747 | 165 SAT1_CF  | blue | na |
| chrUn | 16757826 | 16758371 | 546 SAT1_CF  | blue | na |
| chrUn | 16758413 | 16759273 | 861 SAT1_CF  | blue | na |
| chrUn | 16759287 | 16759968 | 682 SAT1_CF  | blue | na |
| chrUn | 16759980 | 16761192 | 1213 SAT1_CF | blue | na |
| chrUn | 16761239 | 16761375 | 137 SAT1_CF  | blue | na |
| chrUn | 16761403 | 16762595 | 1193 SAT1_CF | blue | na |
| chrUn | 16762622 | 16763253 | 632 SAT1_CF  | blue | na |
| chrUn | 16763296 | 16763960 | 665 SAT1_CF  | blue | na |
| chrUn | 16763983 | 16764665 | 683 SAT1_CF  | blue | na |

|       |          |          |              |      |    |
|-------|----------|----------|--------------|------|----|
| chrUn | 16764685 | 16765158 | 474 SAT1_CF  | blue | na |
| chrUn | 16765218 | 16765791 | 574 SAT1_CF  | blue | na |
| chrUn | 16767190 | 16768479 | 1290 SAT1_CF | blue | na |
| chrUn | 16768521 | 16768832 | 312 SAT1_CF  | blue | na |
| chrUn | 16768874 | 16769394 | 521 SAT1_CF  | blue | na |
| chrUn | 16769428 | 16769793 | 366 SAT1_CF  | blue | na |
| chrUn | 16769825 | 16771449 | 1625 SAT1_CF | blue | na |
| chrUn | 16771492 | 16772164 | 673 SAT1_CF  | blue | na |
| chrUn | 16772177 | 16772740 | 564 SAT1_CF  | blue | na |
| chrUn | 16772779 | 16773497 | 719 SAT1_CF  | blue | na |
| chrUn | 16773540 | 16774206 | 667 SAT1_CF  | blue | na |
| chrUn | 16774218 | 16774692 | 475 SAT1_CF  | blue | na |
| chrUn | 16774762 | 16775435 | 674 SAT1_CF  | blue | na |
| chrUn | 16775447 | 16778046 | 2600 SAT1_CF | blue | na |
| chrUn | 16778059 | 16779430 | 1372 SAT1_CF | blue | na |
| chrUn | 16779468 | 16779870 | 403 SAT1_CF  | blue | na |
| chrUn | 16779881 | 16780430 | 550 SAT1_CF  | blue | na |
| chrUn | 16780474 | 16782279 | 1806 SAT1_CF | blue | na |
| chrUn | 16782293 | 16782883 | 591 SAT1_CF  | blue | na |
| chrUn | 16782910 | 16783969 | 1060 SAT1_CF | blue | na |
| chrUn | 16784013 | 16784557 | 545 SAT1_CF  | blue | na |
| chrUn | 16784599 | 16785985 | 1387 SAT1_CF | blue | na |
| chrUn | 16785998 | 16786496 | 499 SAT1_CF  | blue | na |
| chrUn | 16786544 | 16786940 | 397 SAT1_CF  | blue | na |
| chrUn | 16786972 | 16787388 | 417 SAT1_CF  | blue | na |
| chrUn | 16787430 | 16788466 | 1037 SAT1_CF | blue | na |
| chrUn | 16788523 | 16789155 | 633 SAT1_CF  | blue | na |
| chrUn | 16789167 | 16789770 | 604 SAT1_CF  | blue | na |
| chrUn | 16789783 | 16789888 | 106 SAT1_CF  | blue | na |
| chrUn | 16789909 | 16790462 | 554 SAT1_CF  | blue | na |
| chrUn | 16790474 | 16791337 | 864 SAT1_CF  | blue | na |
| chrUn | 16791379 | 16793085 | 1707 SAT1_CF | blue | na |
| chrUn | 16793120 | 16793289 | 170 SAT1_CF  | blue | na |
| chrUn | 16793302 | 16793803 | 502 SAT1_CF  | blue | na |
| chrUn | 16793843 | 16794243 | 401 SAT1_CF  | blue | na |
| chrUn | 16794254 | 16794801 | 548 SAT1_CF  | blue | na |
| chrUn | 16794881 | 16795185 | 305 SAT1_CF  | blue | na |
| chrUn | 16795230 | 16796563 | 1334 SAT1_CF | blue | na |
| chrUn | 16796575 | 16797334 | 760 SAT1_CF  | blue | na |
| chrUn | 16797348 | 16798575 | 1228 SAT1_CF | blue | na |
| chrUn | 16798587 | 16799059 | 473 SAT1_CF  | blue | na |
| chrUn | 16799080 | 16799189 | 110 SAT1_CF  | blue | na |



|       |          |          |              |      |    |
|-------|----------|----------|--------------|------|----|
| chrUn | 16799200 | 16800319 | 1120 SAT1_CF | blue | na |
| chrUn | 16800362 | 16801038 | 677 SAT1_CF  | blue | na |
| chrUn | 16801050 | 16801624 | 575 SAT1_CF  | blue | na |
| chrUn | 16801645 | 16801753 | 109 SAT1_CF  | blue | na |
| chrUn | 16801766 | 16802595 | 830 SAT1_CF  | blue | na |
| chrUn | 16802609 | 16803579 | 971 SAT1_CF  | blue | na |
| chrUn | 16803623 | 16804825 | 1203 SAT1_CF | blue | na |
| chrUn | 16804847 | 16805521 | 675 SAT1_CF  | blue | na |
| chrUn | 16805543 | 16805650 | 108 SAT1_CF  | blue | na |
| chrUn | 16805663 | 16806163 | 501 SAT1_CF  | blue | na |
| chrUn | 16806203 | 16806608 | 406 SAT1_CF  | blue | na |
| chrUn | 16806622 | 16807692 | 1071 SAT1_CF | blue | na |
| chrUn | 16807706 | 16808244 | 539 SAT1_CF  | blue | na |
| chrUn | 16808287 | 16808961 | 675 SAT1_CF  | blue | na |
| chrUn | 16808973 | 16809732 | 760 SAT1_CF  | blue | na |
| chrUn | 16809745 | 16810376 | 632 SAT1_CF  | blue | na |
| chrUn | 16810393 | 16810505 | 113 SAT1_CF  | blue | na |
| chrUn | 16810516 | 16811018 | 503 SAT1_CF  | blue | na |
| chrUn | 16811071 | 16813079 | 2009 SAT1_CF | blue | na |
| chrUn | 16813110 | 16813603 | 494 SAT1_CF  | blue | na |
| chrUn | 16813705 | 16814634 | 930 SAT1_CF  | blue | na |
| chrUn | 16814703 | 16815674 | 972 SAT1_CF  | blue | na |
| chrUn | 16815723 | 16816380 | 658 SAT1_CF  | blue | na |
| chrUn | 16816407 | 16816909 | 503 SAT1_CF  | blue | na |
| chrUn | 16816996 | 16817351 | 356 SAT1_CF  | blue | na |
| chrUn | 16817364 | 16817873 | 510 SAT1_CF  | blue | na |
| chrUn | 16817952 | 16818991 | 1040 SAT1_CF | blue | na |
| chrUn | 16819035 | 16819201 | 167 SAT1_CF  | blue | na |
| chrUn | 16819217 | 16819781 | 565 SAT1_CF  | blue | na |
| chrUn | 16819793 | 16820646 | 854 SAT1_CF  | blue | na |
| chrUn | 16820658 | 16821260 | 603 SAT1_CF  | blue | na |
| chrUn | 16821273 | 16821775 | 503 SAT1_CF  | blue | na |
| chrUn | 16821820 | 16821977 | 158 SAT1_CF  | blue | na |
| chrUn | 16822005 | 16823715 | 1711 SAT1_CF | blue | na |
| chrUn | 16823727 | 16824225 | 499 SAT1_CF  | blue | na |
| chrUn | 16824265 | 16825297 | 1033 SAT1_CF | blue | na |
| chrUn | 16825320 | 16825426 | 107 SAT1_CF  | blue | na |
| chrUn | 16825439 | 16825937 | 499 SAT1_CF  | blue | na |
| chrUn | 16825973 | 16826157 | 185 SAT1_CF  | blue | na |
| chrUn | 16826341 | 16826507 | 167 SAT1_CF  | blue | na |
| chrUn | 16826588 | 16828252 | 1665 SAT1_CF | blue | na |
| chrUn | 16828295 | 16829505 | 1211 SAT1_CF | blue | na |

|       |          |          |              |      |    |
|-------|----------|----------|--------------|------|----|
| chrUn | 16829531 | 16829688 | 158 SAT1_CF  | blue | na |
| chrUn | 16829703 | 16831026 | 1324 SAT1_CF | blue | na |
| chrUn | 16831049 | 16831520 | 472 SAT1_CF  | blue | na |
| chrUn | 16831594 | 16831761 | 168 SAT1_CF  | blue | na |
| chrUn | 16831941 | 16832175 | 235 SAT1_CF  | blue | na |
| chrUn | 16832186 | 16832731 | 546 SAT1_CF  | blue | na |
| chrUn | 16832753 | 16833744 | 992 SAT1_CF  | blue | na |
| chrUn | 16833788 | 16834975 | 1188 SAT1_CF | blue | na |
| chrUn | 16835030 | 16835903 | 874 SAT1_CF  | blue | na |
| chrUn | 16835946 | 16836734 | 789 SAT1_CF  | blue | na |
| chrUn | 16836759 | 16837593 | 835 SAT1_CF  | blue | na |
| chrUn | 16837614 | 16837722 | 109 SAT1_CF  | blue | na |
| chrUn | 16837735 | 16838236 | 502 SAT1_CF  | blue | na |
| chrUn | 16838274 | 16838678 | 405 SAT1_CF  | blue | na |
| chrUn | 16838691 | 16839295 | 605 SAT1_CF  | blue | na |
| chrUn | 16839350 | 16840314 | 965 SAT1_CF  | blue | na |
| chrUn | 16840357 | 16840865 | 509 SAT1_CF  | blue | na |
| chrUn | 16840886 | 16840961 | 76 SAT1_CF   | blue | na |
| chrUn | 16840972 | 16841473 | 502 SAT1_CF  | blue | na |
| chrUn | 16841518 | 16841675 | 158 SAT1_CF  | blue | na |
| chrUn | 16841707 | 16842213 | 507 SAT1_CF  | blue | na |
| chrUn | 16842244 | 16843704 | 1461 SAT1_CF | blue | na |
| chrUn | 16843716 | 16845353 | 1638 SAT1_CF | blue | na |
| chrUn | 16845396 | 16846071 | 676 SAT1_CF  | blue | na |
| chrUn | 16846084 | 16846567 | 484 SAT1_CF  | blue | na |
| chrUn | 16846671 | 16847218 | 548 SAT1_CF  | blue | na |
| chrUn | 16847232 | 16847932 | 701 SAT1_CF  | blue | na |
| chrUn | 16847973 | 16849656 | 1684 SAT1_CF | blue | na |
| chrUn | 16849683 | 16850163 | 481 SAT1_CF  | blue | na |
| chrUn | 16850219 | 16850589 | 371 SAT1_CF  | blue | na |
| chrUn | 16850634 | 16851249 | 616 SAT1_CF  | blue | na |
| chrUn | 16851265 | 16852259 | 995 SAT1_CF  | blue | na |
| chrUn | 16852302 | 16852978 | 677 SAT1_CF  | blue | na |
| chrUn | 16852992 | 16853750 | 759 SAT1_CF  | blue | na |
| chrUn | 16853762 | 16854900 | 1139 SAT1_CF | blue | na |
| chrUn | 16854968 | 16855844 | 877 SAT1_CF  | blue | na |
| chrUn | 16855960 | 16857543 | 1584 SAT1_CF | blue | na |
| chrUn | 16857563 | 16858058 | 496 SAT1_CF  | blue | na |
| chrUn | 16858098 | 16858280 | 183 SAT1_CF  | blue | na |
| chrUn | 16858651 | 16860339 | 1689 SAT1_CF | blue | na |
| chrUn | 16860381 | 16861243 | 863 SAT1_CF  | blue | na |
| chrUn | 16861255 | 16862632 | 1378 SAT1_CF | blue | na |

|       |          |          |              |      |    |
|-------|----------|----------|--------------|------|----|
| chrUn | 16862652 | 16863145 | 494 SAT1_CF  | blue | na |
| chrUn | 16863187 | 16863589 | 403 SAT1_CF  | blue | na |
| chrUn | 16863600 | 16864210 | 611 SAT1_CF  | blue | na |
| chrUn | 16864230 | 16864832 | 603 SAT1_CF  | blue | na |
| chrUn | 16864912 | 16865458 | 547 SAT1_CF  | blue | na |
| chrUn | 16865471 | 16865587 | 117 SAT1_CF  | blue | na |
| chrUn | 16865599 | 16866270 | 672 SAT1_CF  | blue | na |
| chrUn | 16866293 | 16866794 | 502 SAT1_CF  | blue | na |
| chrUn | 16866860 | 16866996 | 137 SAT1_CF  | blue | na |
| chrUn | 16867024 | 16867572 | 549 SAT1_CF  | blue | na |
| chrUn | 16867602 | 16867868 | 267 SAT1_CF  | blue | na |
| chrUn | 16867947 | 16870121 | 2175 SAT1_CF | blue | na |
| chrUn | 16870136 | 16870675 | 540 SAT1_CF  | blue | na |
| chrUn | 16870718 | 16871394 | 677 SAT1_CF  | blue | na |
| chrUn | 16871406 | 16872733 | 1328 SAT1_CF | blue | na |
| chrUn | 16872758 | 16873376 | 619 SAT1_CF  | blue | na |
| chrUn | 16873422 | 16873816 | 395 SAT1_CF  | blue | na |
| chrUn | 16873831 | 16874351 | 521 SAT1_CF  | blue | na |
| chrUn | 16874382 | 16874921 | 540 SAT1_CF  | blue | na |
| chrUn | 16874932 | 16875457 | 526 SAT1_CF  | blue | na |
| chrUn | 16875500 | 16876173 | 674 SAT1_CF  | blue | na |
| chrUn | 16876185 | 16876865 | 681 SAT1_CF  | blue | na |
| chrUn | 16876877 | 16877723 | 847 SAT1_CF  | blue | na |
| chrUn | 16877754 | 16878622 | 869 SAT1_CF  | blue | na |
| chrUn | 16878663 | 16879189 | 527 SAT1_CF  | blue | na |
| chrUn | 16879241 | 16879359 | 119 SAT1_CF  | blue | na |
| chrUn | 16879406 | 16880079 | 674 SAT1_CF  | blue | na |
| chrUn | 16880091 | 16880257 | 167 SAT1_CF  | blue | na |
| chrUn | 16880275 | 16880757 | 483 SAT1_CF  | blue | na |
| chrUn | 16880863 | 16881752 | 890 SAT1_CF  | blue | na |
| chrUn | 16881784 | 16882637 | 854 SAT1_CF  | blue | na |
| chrUn | 16882669 | 16883556 | 888 SAT1_CF  | blue | na |
| chrUn | 16883568 | 16884327 | 760 SAT1_CF  | blue | na |
| chrUn | 16884340 | 16884839 | 500 SAT1_CF  | blue | na |
| chrUn | 16884884 | 16885041 | 158 SAT1_CF  | blue | na |
| chrUn | 16885080 | 16887378 | 2299 SAT1_CF | blue | na |
| chrUn | 16887390 | 16887951 | 562 SAT1_CF  | blue | na |
| chrUn | 16887972 | 16888080 | 109 SAT1_CF  | blue | na |
| chrUn | 16888093 | 16888593 | 501 SAT1_CF  | blue | na |
| chrUn | 16888638 | 16889035 | 398 SAT1_CF  | blue | na |
| chrUn | 16889047 | 16890450 | 1404 SAT1_CF | blue | na |
| chrUn | 16890481 | 16890522 | 42 SAT1_CF   | blue | na |

|       |          |          |              |      |    |
|-------|----------|----------|--------------|------|----|
| chrUn | 16890535 | 16891258 | 724 SAT1_CF  | blue | na |
| chrUn | 16891279 | 16893791 | 2513 SAT1_CF | blue | na |
| chrUn | 16893834 | 16894508 | 675 SAT1_CF  | blue | na |
| chrUn | 16894520 | 16894996 | 477 SAT1_CF  | blue | na |
| chrUn | 16895066 | 16895739 | 674 SAT1_CF  | blue | na |
| chrUn | 16895751 | 16896915 | 1165 SAT1_CF | blue | na |
| chrUn | 16896933 | 16898617 | 1685 SAT1_CF | blue | na |
| chrUn | 16898629 | 16899299 | 671 SAT1_CF  | blue | na |
| chrUn | 16899320 | 16899883 | 564 SAT1_CF  | blue | na |
| chrUn | 16899926 | 16900602 | 677 SAT1_CF  | blue | na |
| chrUn | 16900614 | 16901095 | 482 SAT1_CF  | blue | na |
| chrUn | 16901201 | 16901713 | 513 SAT1_CF  | blue | na |
| chrUn | 16901750 | 16902294 | 545 SAT1_CF  | blue | na |
| chrUn | 16902308 | 16903191 | 884 SAT1_CF  | blue | na |
| chrUn | 16903234 | 16903899 | 666 SAT1_CF  | blue | na |
| chrUn | 16903912 | 16904594 | 683 SAT1_CF  | blue | na |
| chrUn | 16904607 | 16905108 | 502 SAT1_CF  | blue | na |
| chrUn | 16905141 | 16906200 | 1060 SAT1_CF | blue | na |
| chrUn | 16906216 | 16907176 | 961 SAT1_CF  | blue | na |
| chrUn | 16907224 | 16907889 | 666 SAT1_CF  | blue | na |
| chrUn | 16907911 | 16908385 | 475 SAT1_CF  | blue | na |
| chrUn | 16908456 | 16908999 | 544 SAT1_CF  | blue | na |
| chrUn | 16909021 | 16909129 | 109 SAT1_CF  | blue | na |
| chrUn | 16909143 | 16909829 | 687 SAT1_CF  | blue | na |
| chrUn | 16909841 | 16910415 | 575 SAT1_CF  | blue | na |
| chrUn | 16910438 | 16910544 | 107 SAT1_CF  | blue | na |
| chrUn | 16910558 | 16911608 | 1051 SAT1_CF | blue | na |
| chrUn | 16911647 | 16913685 | 2039 SAT1_CF | blue | na |
| chrUn | 16913728 | 16914402 | 675 SAT1_CF  | blue | na |
| chrUn | 16914414 | 16914970 | 557 SAT1_CF  | blue | na |
| chrUn | 16915009 | 16915739 | 731 SAT1_CF  | blue | na |
| chrUn | 16915918 | 16915994 | 77 SAT1_CF   | blue | na |
| chrUn | 16916010 | 16917876 | 1867 SAT1_CF | blue | na |
| chrUn | 16917920 | 16918701 | 782 SAT1_CF  | blue | na |
| chrUn | 16918743 | 16920016 | 1274 SAT1_CF | blue | na |
| chrUn | 16920027 | 16920709 | 683 SAT1_CF  | blue | na |
| chrUn | 16920722 | 16921241 | 520 SAT1_CF  | blue | na |
| chrUn | 16921265 | 16923323 | 2059 SAT1_CF | blue | na |
| chrUn | 16923365 | 16924736 | 1372 SAT1_CF | blue | na |
| chrUn | 16924756 | 16926725 | 1970 SAT1_CF | blue | na |
| chrUn | 16926747 | 16927242 | 496 SAT1_CF  | blue | na |
| chrUn | 16927286 | 16927444 | 159 SAT1_CF  | blue | na |

|       |          |          |              |        |    |
|-------|----------|----------|--------------|--------|----|
| chrUn | 16927472 | 16929166 | 1695 SAT1_CF | blue   | na |
| chrUn | 16929208 | 16930069 | 862 SAT1_CF  | blue   | na |
| chrUn | 16930083 | 16931298 | 1216 SAT1_CF | blue   | na |
| chrUn | 16931319 | 16933283 | 1965 SAT1_CF | blue   | na |
| chrUn | 16933325 | 16934694 | 1370 SAT1_CF | blue   | na |
| chrUn | 16934707 | 16935207 | 501 SAT1_CF  | blue   | na |
| chrUn | 16935220 | 16935799 | 580 SAT1_CF  | blue   | na |
| chrUn | 16935817 | 16937595 | 1779 CarSat1 | red    | na |
| chrUn | 16937809 | 16939612 | 1804 CarSat1 | red    | na |
| chrUn | 16939627 | 16939750 | 124 Carsat2  | orange | na |
| chrUn | 16939642 | 16941823 | 2182 CarSat1 | red    | na |
| chrUn | 16941853 | 16943296 | 1444 CarSat1 | red    | na |
| chrUn | 16943311 | 16943437 | 127 Carsat2  | orange | na |
| chrUn | 16943326 | 16944032 | 707 CarSat1  | red    | na |
| chrUn | 16944061 | 16944772 | 712 CarSat1  | red    | na |
| chrUn | 16944802 | 16945512 | 711 CarSat1  | red    | na |
| chrUn | 16945527 | 16945654 | 128 Carsat2  | orange | na |
| chrUn | 16945542 | 16949718 | 4177 CarSat1 | red    | na |
| chrUn | 16949734 | 16952139 | 2406 CarSat1 | red    | na |
| chrUn | 16953735 | 16954164 | 430 CarSat1  | red    | na |
| chrUn | 16954182 | 16954901 | 720 CarSat1  | red    | na |
| chrUn | 16954896 | 16955511 | 616 SAT1_CF  | blue   | na |
| chrUn | 16955524 | 16956032 | 509 SAT1_CF  | blue   | na |
| chrUn | 16956073 | 16957347 | 1275 SAT1_CF | blue   | na |
| chrUn | 16957385 | 16958866 | 1482 SAT1_CF | blue   | na |
| chrUn | 16958878 | 16959349 | 472 SAT1_CF  | blue   | na |
| chrUn | 16959351 | 16961314 | 1964 CarSat1 | red    | na |
| chrUn | 16961340 | 16962929 | 1590 CarSat1 | red    | na |
| chrUn | 16962951 | 16963653 | 703 CarSat1  | red    | na |
| chrUn | 16978261 | 16978419 | 159 Sat2CF   | purple | na |
| chrUn | 16978284 | 16978994 | 711 Sat2CF   | purple | na |
| chrUn | 17009574 | 17010724 | 1151 Sat2CF  | purple | na |
| chrUn | 17030942 | 17031104 | 163 Sat2CF   | purple | na |
| chrUn | 17030970 | 17031685 | 716 Sat2CF   | purple | na |
| chrUn | 17055949 | 17057103 | 1155 Sat2CF  | purple | na |
| chrUn | 17056975 | 17057123 | 149 Sat2CF   | purple | na |
| chrUn | 17068005 | 17069173 | 1169 Sat2CF  | purple | na |
| chrUn | 17068645 | 17069240 | 596 Sat2CF   | purple | na |
| chrUn | 17083933 | 17084731 | 799 Sat2CF   | purple | na |
| chrUn | 17084613 | 17084781 | 169 Sat2CF   | purple | na |
| chrUn | 17096585 | 17097759 | 1175 Sat2CF  | purple | na |
| chrUn | 17136144 | 17136956 | 813 Sat2CF   | purple | na |

|       |          |          |              |        |    |
|-------|----------|----------|--------------|--------|----|
| chrUn | 17136218 | 17136943 | 726 Sat2CF   | purple | na |
| chrUn | 17160043 | 17160780 | 738 Sat2CF   | purple | na |
| chrUn | 17160117 | 17160778 | 662 Sat2CF   | purple | na |
| chrUn | 17192561 | 17193813 | 1253 Sat2CF  | purple | na |
| chrUn | 17192691 | 17193777 | 1087 Sat2CF  | purple | na |
| chrUn | 17217381 | 17217543 | 163 Sat2CF   | purple | na |
| chrUn | 17217407 | 17218255 | 849 Sat2CF   | purple | na |
| chrUn | 17217588 | 17218336 | 749 Sat2CF   | purple | na |
| chrUn | 17246651 | 17247274 | 624 Sat2CF   | purple | na |
| chrUn | 17246720 | 17247285 | 566 Sat2CF   | purple | na |
| chrUn | 17262398 | 17263541 | 1144 Sat2CF  | purple | na |
| chrUn | 17262402 | 17263670 | 1269 Sat2CF  | purple | na |
| chrUn | 17280938 | 17282106 | 1169 Sat2CF  | purple | na |
| chrUn | 17397352 | 17398603 | 1252 Sat2CF  | purple | na |
| chrUn | 17397482 | 17398567 | 1086 Sat2CF  | purple | na |
| chrUn | 17401274 | 17401413 | 140 CarSat1  | red    | na |
| chrUn | 17401434 | 17403026 | 1593 CarSat1 | red    | na |
| chrUn | 17403047 | 17404531 | 1485 CarSat1 | red    | na |
| chrUn | 17414182 | 17414295 | 114 Carsat2  | orange | na |
| chrUn | 17414209 | 17415604 | 1396 CarSat1 | red    | na |
| chrUn | 17415619 | 17416404 | 786 CarSat1  | red    | na |
| chrUn | 17416423 | 17416825 | 403 CarSat1  | red    | na |
| chrUn | 17416854 | 17418230 | 1377 SAT1_CF | blue   | na |
| chrUn | 17418425 | 17418587 | 163 Sat2CF   | purple | na |
| chrUn | 17418458 | 17419471 | 1014 Sat2CF  | purple | na |
| chrUn | 17418546 | 17419408 | 863 Sat2CF   | purple | na |
| chrUn | 17425256 | 17425668 | 413 CarSat1  | red    | na |
| chrUn | 17425702 | 17426197 | 496 CarSat1  | red    | na |
| chrUn | 17426213 | 17426801 | 589 CarSat1  | red    | na |
| chrUn | 17427006 | 17427596 | 591 CarSat1  | red    | na |
| chrUn | 17429264 | 17430787 | 1524 CarSat1 | red    | na |
| chrUn | 17430808 | 17431522 | 715 CarSat1  | red    | na |
| chrUn | 17431543 | 17432992 | 1450 CarSat1 | red    | na |
| chrUn | 17433013 | 17433727 | 715 CarSat1  | red    | na |
| chrUn | 17433748 | 17434462 | 715 CarSat1  | red    | na |
| chrUn | 17434483 | 17435197 | 715 CarSat1  | red    | na |
| chrUn | 17435218 | 17435932 | 715 CarSat1  | red    | na |
| chrUn | 17435953 | 17436667 | 715 CarSat1  | red    | na |
| chrUn | 17436688 | 17438389 | 1702 CarSat1 | red    | na |
| chrUn | 17438405 | 17439126 | 722 CarSat1  | red    | na |
| chrUn | 17439142 | 17439864 | 723 CarSat1  | red    | na |
| chrUn | 17439880 | 17441828 | 1949 CarSat1 | red    | na |

|       |          |          |      |         |        |    |
|-------|----------|----------|------|---------|--------|----|
| chrUn | 17441855 | 17443553 | 1699 | CarSat1 | red    | na |
| chrUn | 17443569 | 17444291 | 723  | CarSat1 | red    | na |
| chrUn | 17444307 | 17445028 | 722  | CarSat1 | red    | na |
| chrUn | 17445044 | 17446500 | 1457 | CarSat1 | red    | na |
| chrUn | 17446516 | 17447721 | 1206 | CarSat1 | red    | na |
| chrUn | 17447748 | 17448709 | 962  | CarSat1 | red    | na |
| chrUn | 17448725 | 17452388 | 3664 | CarSat1 | red    | na |
| chrUn | 17452413 | 17453589 | 1177 | CarSat1 | red    | na |
| chrUn | 17454113 | 17454597 | 485  | CarSat1 | red    | na |
| chrUn | 17454622 | 17455087 | 466  | CarSat1 | red    | na |
| chrUn | 17455114 | 17460491 | 5378 | CarSat1 | red    | na |
| chrUn | 17460516 | 17461779 | 1264 | CarSat1 | red    | na |
| chrUn | 17473105 | 17473998 | 894  | CarSat1 | red    | na |
| chrUn | 17474221 | 17475666 | 1446 | CarSat1 | red    | na |
| chrUn | 17475697 | 17477285 | 1589 | CarSat1 | red    | na |
| chrUn | 17477316 | 17479477 | 2162 | CarSat1 | red    | na |
| chrUn | 17479682 | 17480395 | 714  | CarSat1 | red    | na |
| chrUn | 17640435 | 17640603 | 169  | Sat2CF  | purple | na |
| chrUn | 17640485 | 17641279 | 795  | Sat2CF  | purple | na |
| chrUn | 17656147 | 17656324 | 178  | Sat2CF  | purple | na |
| chrUn | 17656195 | 17656710 | 516  | Sat2CF  | purple | na |
| chrUn | 17656147 | 17656324 | 178  | Sat2CF  | purple | na |
| chrUn | 17656420 | 17656751 | 332  | Sat2CF  | purple | na |
| chrUn | 17665805 | 17666925 | 1121 | Sat2CF  | purple | na |
| chrUn | 17681761 | 17682558 | 798  | Sat2CF  | purple | na |
| chrUn | 17760057 | 17760794 | 738  | Sat2CF  | purple | na |
| chrUn | 17760059 | 17760720 | 662  | Sat2CF  | purple | na |
| chrUn | 17784094 | 17784906 | 813  | Sat2CF  | purple | na |
| chrUn | 17784107 | 17784832 | 726  | Sat2CF  | purple | na |
| chrUn | 17802841 | 17803957 | 1117 | Sat2CF  | purple | na |
| chrUn | 17822481 | 17822994 | 514  | Sat2CF  | purple | na |
| chrUn | 17822543 | 17823390 | 848  | Sat2CF  | purple | na |
| chrUn | 17822767 | 17823465 | 699  | Sat2CF  | purple | na |
| chrUn | 17850155 | 17851338 | 1184 | Sat2CF  | purple | na |
| chrUn | 17879852 | 17881029 | 1178 | Sat2CF  | purple | na |
| chrUn | 17892902 | 17893700 | 799  | Sat2CF  | purple | na |
| chrUn | 17920440 | 17920588 | 149  | Sat2CF  | purple | na |
| chrUn | 17920460 | 17921542 | 1083 | Sat2CF  | purple | na |
| chrUn | 17920440 | 17920588 | 149  | Sat2CF  | purple | na |
| chrUn | 17940626 | 17941342 | 717  | Sat2CF  | purple | na |
| chrUn | 17941208 | 17941370 | 163  | Sat2CF  | purple | na |
| chrUn | 17959866 | 17961001 | 1136 | Sat2CF  | purple | na |

|       |          |          |              |        |    |
|-------|----------|----------|--------------|--------|----|
| chrUn | 17982809 | 17983523 | 715 Sat2CF   | purple | na |
| chrUn | 17983201 | 17983562 | 362 Sat2CF   | purple | na |
| chrUn | 17994262 | 17994965 | 704 CarSat1  | red    | na |
| chrUn | 17994987 | 17996960 | 1974 CarSat1 | red    | na |
| chrUn | 17996962 | 17997432 | 471 SAT1_CF  | blue   | na |
| chrUn | 17997444 | 18000243 | 2800 SAT1_CF | blue   | na |
| chrUn | 18000283 | 18000785 | 503 SAT1_CF  | blue   | na |
| chrUn | 18000803 | 18001413 | 611 SAT1_CF  | blue   | na |
| chrUn | 18001408 | 18002121 | 714 CarSat1  | red    | na |
| chrUn | 18002273 | 18002566 | 294 CarSat1  | red    | na |
| chrUn | 18011686 | 18013172 | 1487 CarSat1 | red    | na |
| chrUn | 18013451 | 18013663 | 213 CarSat1  | red    | na |
| chrUn | 18454111 | 18455289 | 1179 Sat2CF  | purple | na |
| chrUn | 18478340 | 18479415 | 1076 Sat2CF  | purple | na |
| chrUn | 18492278 | 18492668 | 391 Sat2CF   | purple | na |
| chrUn | 18492344 | 18492694 | 351 Sat2CF   | purple | na |
| chrUn | 18552236 | 18553411 | 1176 Sat2CF  | purple | na |
| chrUn | 18570556 | 18571453 | 898 Sat2CF   | purple | na |
| chrUn | 18570619 | 18571408 | 790 Sat2CF   | purple | na |
| chrUn | 18588788 | 18589919 | 1132 Sat2CF  | purple | na |
| chrUn | 18608346 | 18609299 | 954 Sat2CF   | purple | na |
| chrUn | 18608409 | 18609219 | 811 Sat2CF   | purple | na |
| chrUn | 18627505 | 18628756 | 1252 Sat2CF  | purple | na |
| chrUn | 18627635 | 18628720 | 1086 Sat2CF  | purple | na |
| chrUn | 18664702 | 18665587 | 886 Sat2CF   | purple | na |
| chrUn | 18683451 | 18684238 | 788 Sat2CF   | purple | na |
| chrUn | 18699742 | 18700941 | 1200 Sat2CF  | purple | na |
| chrUn | 18699871 | 18700957 | 1087 Sat2CF  | purple | na |
| chrUn | 18734431 | 18734595 | 165 Sat2CF   | purple | na |
| chrUn | 18734459 | 18735310 | 852 Sat2CF   | purple | na |
| chrUn | 18734708 | 18735381 | 674 Sat2CF   | purple | na |
| chrUn | 18763691 | 18764911 | 1221 Sat2CF  | purple | na |
| chrUn | 18764782 | 18764931 | 150 Sat2CF   | purple | na |
| chrUn | 18780028 | 18780406 | 379 Sat2CF   | purple | na |
| chrUn | 18780464 | 18780815 | 352 Sat2CF   | purple | na |
| chrUn | 18780500 | 18781846 | 1347 Sat2CF  | purple | na |
| chrUn | 18780708 | 18782051 | 1344 Sat2CF  | purple | na |
| chrUn | 18781324 | 18782136 | 813 Sat2CF   | purple | na |
| chrUn | 18799713 | 18800881 | 1169 Sat2CF  | purple | na |
| chrUn | 18800703 | 18800901 | 199 Sat2CF   | purple | na |
| chrUn | 18800773 | 18800920 | 148 Sat2CF   | purple | na |
| chrUn | 18812984 | 18813795 | 812 Sat2CF   | purple | na |



|       |          |          |              |        |    |
|-------|----------|----------|--------------|--------|----|
| chrUn | 18813049 | 18813774 | 726 Sat2CF   | purple | na |
| chrUn | 18813664 | 18813832 | 169 Sat2CF   | purple | na |
| chrUn | 18826819 | 18827483 | 665 Sat2CF   | purple | na |
| chrUn | 18835423 | 18835523 | 101 SAT1_CF  | blue   | na |
| chrUn | 18835542 | 18835585 | 44 SAT1_CF   | blue   | na |
| chrUn | 18835616 | 18836160 | 545 SAT1_CF  | blue   | na |
| chrUn | 18836203 | 18836750 | 548 SAT1_CF  | blue   | na |
| chrUn | 18836761 | 18837215 | 455 SAT1_CF  | blue   | na |
| chrUn | 18837280 | 18838386 | 1107 CarSat1 | red    | na |
| chrUn | 18838540 | 18840131 | 1592 CarSat1 | red    | na |
| chrUn | 18840152 | 18841601 | 1450 CarSat1 | red    | na |
| chrUn | 18841760 | 18842465 | 706 CarSat1  | red    | na |
| chrUn | 18867015 | 18868025 | 1011 Sat2CF  | purple | na |
| chrUn | 18867897 | 18868045 | 149 Sat2CF   | purple | na |
| chrUn | 18895974 | 18896908 | 935 Sat2CF   | purple | na |
| chrUn | 18896037 | 18896827 | 791 Sat2CF   | purple | na |
| chrUn | 18903044 | 18903389 | 346 Sat2CF   | purple | na |
| chrUn | 18903103 | 18903893 | 791 Sat2CF   | purple | na |
| chrUn | 18922278 | 18923394 | 1117 Sat2CF  | purple | na |
| chrUn | 18941587 | 18942528 | 942 Sat2CF   | purple | na |
| chrUn | 18963816 | 18964553 | 738 Sat2CF   | purple | na |
| chrUn | 18963890 | 18964551 | 662 Sat2CF   | purple | na |
| chrUn | 19004558 | 19005792 | 1235 Sat2CF  | purple | na |
| chrUn | 19004685 | 19005805 | 1121 Sat2CF  | purple | na |
| chrUn | 19029789 | 19030712 | 924 Sat2CF   | purple | na |
| chrUn | 19029852 | 19030661 | 810 Sat2CF   | purple | na |
| chrUn | 19062347 | 19062868 | 522 Sat2CF   | purple | na |
| chrUn | 19062411 | 19063238 | 828 Sat2CF   | purple | na |
| chrUn | 19079777 | 19080902 | 1126 Sat2CF  | purple | na |
| chrUn | 19079904 | 19080941 | 1038 Sat2CF  | purple | na |
| chrUn | 19112155 | 19113322 | 1168 Sat2CF  | purple | na |
| chrUn | 19142090 | 19143269 | 1180 Sat2CF  | purple | na |
| chrUn | 19143109 | 19143308 | 200 Sat2CF   | purple | na |
| chrUn | 19170997 | 19171934 | 938 Sat2CF   | purple | na |
| chrUn | 19173653 | 19174066 | 414 CarSat1  | red    | na |
| chrUn | 19175034 | 19176270 | 1237 CarSat1 | red    | na |
| chrUn | 19176308 | 19177179 | 872 CarSat1  | red    | na |
| chrUn | 19177174 | 19180942 | 3769 SAT1_CF | blue   | na |
| chrUn | 19180954 | 19181119 | 166 SAT1_CF  | blue   | na |
| chrUn | 19181131 | 19181737 | 607 SAT1_CF  | blue   | na |
| chrUn | 19181748 | 19182292 | 545 SAT1_CF  | blue   | na |
| chrUn | 19182305 | 19182935 | 631 SAT1_CF  | blue   | na |

|       |          |          |              |        |    |
|-------|----------|----------|--------------|--------|----|
| chrUn | 19189247 | 19190947 | 1701 SAT1_CF | blue   | na |
| chrUn | 19190952 | 19191434 | 483 CarSat1  | red    | na |
| chrUn | 19191463 | 19192841 | 1379 CarSat1 | red    | na |
| chrUn | 19192871 | 19193575 | 705 CarSat1  | red    | na |
| chrUn | 19214489 | 19215265 | 777 Sat2CF   | purple | na |
| chrUn | 19214554 | 19215245 | 692 Sat2CF   | purple | na |
| chrUn | 19217954 | 19218530 | 577 SAT1_CF  | blue   | na |
| chrUn | 19218543 | 19219042 | 500 SAT1_CF  | blue   | na |
| chrUn | 19219082 | 19220112 | 1031 SAT1_CF | blue   | na |
| chrUn | 19220139 | 19220332 | 194 SAT1_CF  | blue   | na |
| chrUn | 19220412 | 19220974 | 563 SAT1_CF  | blue   | na |
| chrUn | 19221018 | 19222223 | 1206 SAT1_CF | blue   | na |
| chrUn | 19222280 | 19222804 | 525 SAT1_CF  | blue   | na |
| chrUn | 19222827 | 19223547 | 721 SAT1_CF  | blue   | na |
| chrUn | 19223651 | 19224985 | 1335 SAT1_CF | blue   | na |
| chrUn | 19225029 | 19226393 | 1365 SAT1_CF | blue   | na |
| chrUn | 19226406 | 19226907 | 502 SAT1_CF  | blue   | na |
| chrUn | 19226946 | 19227127 | 182 SAT1_CF  | blue   | na |
| chrUn | 19227309 | 19229345 | 2037 SAT1_CF | blue   | na |
| chrUn | 19229359 | 19230120 | 762 SAT1_CF  | blue   | na |
| chrUn | 19230133 | 19230632 | 500 SAT1_CF  | blue   | na |
| chrUn | 19230672 | 19231702 | 1031 SAT1_CF | blue   | na |
| chrUn | 19231745 | 19232290 | 546 SAT1_CF  | blue   | na |
| chrUn | 19232340 | 19233040 | 701 SAT1_CF  | blue   | na |
| chrUn | 19233090 | 19233706 | 617 SAT1_CF  | blue   | na |
| chrUn | 19233729 | 19233834 | 106 SAT1_CF  | blue   | na |
| chrUn | 19233847 | 19234348 | 502 SAT1_CF  | blue   | na |
| chrUn | 19234388 | 19234568 | 181 SAT1_CF  | blue   | na |
| chrUn | 19234748 | 19236795 | 2048 SAT1_CF | blue   | na |
| chrUn | 19236809 | 19237490 | 682 SAT1_CF  | blue   | na |
| chrUn | 19237503 | 19238203 | 701 SAT1_CF  | blue   | na |
| chrUn | 19238254 | 19238742 | 489 SAT1_CF  | blue   | na |
| chrUn | 19238773 | 19240076 | 1304 SAT1_CF | blue   | na |
| chrUn | 19240124 | 19241454 | 1331 SAT1_CF | blue   | na |
| chrUn | 19241467 | 19242227 | 761 SAT1_CF  | blue   | na |
| chrUn | 19242240 | 19242740 | 501 SAT1_CF  | blue   | na |
| chrUn | 19242800 | 19242942 | 143 SAT1_CF  | blue   | na |
| chrUn | 19242957 | 19243702 | 746 SAT1_CF  | blue   | na |
| chrUn | 19243763 | 19244986 | 1224 SAT1_CF | blue   | na |
| chrUn | 19244999 | 19245797 | 799 SAT1_CF  | blue   | na |
| chrUn | 19245841 | 19246730 | 890 SAT1_CF  | blue   | na |
| chrUn | 19246769 | 19248069 | 1301 SAT1_CF | blue   | na |

|       |          |          |              |      |    |
|-------|----------|----------|--------------|------|----|
| chrUn | 19248081 | 19248779 | 699 SAT1_CF  | blue | na |
| chrUn | 19248797 | 19249387 | 591 SAT1_CF  | blue | na |
| chrUn | 19249406 | 19249515 | 110 SAT1_CF  | blue | na |
| chrUn | 19249527 | 19250205 | 679 SAT1_CF  | blue | na |
| chrUn | 19250218 | 19251162 | 945 SAT1_CF  | blue | na |
| chrUn | 19251175 | 19252984 | 1810 SAT1_CF | blue | na |
| chrUn | 19253004 | 19253939 | 936 SAT1_CF  | blue | na |
| chrUn | 19253951 | 19254111 | 161 SAT1_CF  | blue | na |
| chrUn | 19254134 | 19254679 | 546 SAT1_CF  | blue | na |
| chrUn | 19254693 | 19255392 | 700 SAT1_CF  | blue | na |
| chrUn | 19255434 | 19256294 | 861 SAT1_CF  | blue | na |
| chrUn | 19256307 | 19256652 | 346 SAT1_CF  | blue | na |
| chrUn | 19263526 | 19264602 | 1077 SAT1_CF | blue | na |
| chrUn | 19264628 | 19264784 | 157 SAT1_CF  | blue | na |
| chrUn | 19264799 | 19266124 | 1326 SAT1_CF | blue | na |
| chrUn | 19266147 | 19266617 | 471 SAT1_CF  | blue | na |
| chrUn | 19266678 | 19266858 | 181 SAT1_CF  | blue | na |
| chrUn | 19267038 | 19267240 | 203 SAT1_CF  | blue | na |
| chrUn | 19267283 | 19269510 | 2228 SAT1_CF | blue | na |
| chrUn | 19269535 | 19270037 | 503 SAT1_CF  | blue | na |
| chrUn | 19270153 | 19270364 | 212 SAT1_CF  | blue | na |
| chrUn | 19270385 | 19270488 | 104 SAT1_CF  | blue | na |
| chrUn | 19270506 | 19271050 | 545 SAT1_CF  | blue | na |
| chrUn | 19271127 | 19272185 | 1059 SAT1_CF | blue | na |
| chrUn | 19272240 | 19273019 | 780 SAT1_CF  | blue | na |
| chrUn | 19273067 | 19274400 | 1334 SAT1_CF | blue | na |
| chrUn | 19274442 | 19275693 | 1252 SAT1_CF | blue | na |
| chrUn | 19275705 | 19276465 | 761 SAT1_CF  | blue | na |
| chrUn | 19276478 | 19276980 | 503 SAT1_CF  | blue | na |
| chrUn | 19277033 | 19277421 | 389 SAT1_CF  | blue | na |
| chrUn | 19277432 | 19278295 | 864 SAT1_CF  | blue | na |
| chrUn | 19278333 | 19279427 | 1095 SAT1_CF | blue | na |
| chrUn | 19279484 | 19280031 | 548 SAT1_CF  | blue | na |
| chrUn | 19280074 | 19281174 | 1101 SAT1_CF | blue | na |
| chrUn | 19281186 | 19281875 | 690 SAT1_CF  | blue | na |
| chrUn | 19281888 | 19282637 | 750 SAT1_CF  | blue | na |
| chrUn | 19282649 | 19283204 | 556 SAT1_CF  | blue | na |
| chrUn | 19283225 | 19283332 | 108 SAT1_CF  | blue | na |
| chrUn | 19283352 | 19283890 | 539 SAT1_CF  | blue | na |
| chrUn | 19284007 | 19284919 | 913 SAT1_CF  | blue | na |
| chrUn | 19284997 | 19285322 | 326 SAT1_CF  | blue | na |
| chrUn | 19285346 | 19286679 | 1334 SAT1_CF | blue | na |

|       |          |          |              |      |    |
|-------|----------|----------|--------------|------|----|
| chrUn | 19286692 | 19287192 | 501 SAT1_CF  | blue | na |
| chrUn | 19287237 | 19287393 | 157 SAT1_CF  | blue | na |
| chrUn | 19287426 | 19288600 | 1175 SAT1_CF | blue | na |
| chrUn | 19288623 | 19288728 | 106 SAT1_CF  | blue | na |
| chrUn | 19288741 | 19288915 | 175 SAT1_CF  | blue | na |
| chrUn | 19288927 | 19289423 | 497 SAT1_CF  | blue | na |
| chrUn | 19289462 | 19289862 | 401 SAT1_CF  | blue | na |
| chrUn | 19289874 | 19291416 | 1543 SAT1_CF | blue | na |
| chrUn | 19291428 | 19291986 | 559 SAT1_CF  | blue | na |
| chrUn | 19292051 | 19292597 | 547 SAT1_CF  | blue | na |
| chrUn | 19292640 | 19292965 | 326 SAT1_CF  | blue | na |
| chrUn | 19292990 | 19294323 | 1334 SAT1_CF | blue | na |
| chrUn | 19294335 | 19295570 | 1236 SAT1_CF | blue | na |
| chrUn | 19295613 | 19296251 | 639 SAT1_CF  | blue | na |
| chrUn | 19296264 | 19296940 | 677 SAT1_CF  | blue | na |
| chrUn | 19296974 | 19298467 | 1494 SAT1_CF | blue | na |
| chrUn | 19298511 | 19298848 | 338 SAT1_CF  | blue | na |
| chrUn | 19298896 | 19301488 | 2593 SAT1_CF | blue | na |
| chrUn | 19301516 | 19302316 | 801 SAT1_CF  | blue | na |
| chrUn | 19302360 | 19303010 | 651 SAT1_CF  | blue | na |
| chrUn | 19303024 | 19304365 | 1342 SAT1_CF | blue | na |
| chrUn | 19304392 | 19304877 | 486 SAT1_CF  | blue | na |
| chrUn | 19304903 | 19306419 | 1517 SAT1_CF | blue | na |
| chrUn | 19306434 | 19306975 | 542 SAT1_CF  | blue | na |
| chrUn | 19307018 | 19307683 | 666 SAT1_CF  | blue | na |
| chrUn | 19307696 | 19308197 | 502 SAT1_CF  | blue | na |
| chrUn | 19308237 | 19310269 | 2033 SAT1_CF | blue | na |
| chrUn | 19310312 | 19310977 | 666 SAT1_CF  | blue | na |
| chrUn | 19310999 | 19312047 | 1049 SAT1_CF | blue | na |
| chrUn | 19312152 | 19312975 | 824 SAT1_CF  | blue | na |
| chrUn | 19312988 | 19313929 | 942 SAT1_CF  | blue | na |
| chrUn | 19313981 | 19314169 | 189 SAT1_CF  | blue | na |
| chrUn | 19314182 | 19314703 | 522 SAT1_CF  | blue | na |
| chrUn | 19314770 | 19315547 | 778 SAT1_CF  | blue | na |
| chrUn | 19315589 | 19316318 | 730 SAT1_CF  | blue | na |
| chrUn | 19316423 | 19317107 | 685 SAT1_CF  | blue | na |
| chrUn | 19317120 | 19317971 | 852 SAT1_CF  | blue | na |
| chrUn | 19317993 | 19318878 | 886 SAT1_CF  | blue | na |
| chrUn | 19318890 | 19319567 | 678 SAT1_CF  | blue | na |
| chrUn | 19319585 | 19320249 | 665 SAT1_CF  | blue | na |
| chrUn | 19320276 | 19320758 | 483 SAT1_CF  | blue | na |
| chrUn | 19320864 | 19321424 | 561 SAT1_CF  | blue | na |

|       |          |          |              |      |    |
|-------|----------|----------|--------------|------|----|
| chrUn | 19321489 | 19322120 | 632 SAT1_CF  | blue | na |
| chrUn | 19322163 | 19322828 | 666 SAT1_CF  | blue | na |
| chrUn | 19322841 | 19323522 | 682 SAT1_CF  | blue | na |
| chrUn | 19323535 | 19324335 | 801 SAT1_CF  | blue | na |
| chrUn | 19324351 | 19324464 | 114 SAT1_CF  | blue | na |
| chrUn | 19324476 | 19324991 | 516 SAT1_CF  | blue | na |
| chrUn | 19325135 | 19326046 | 912 SAT1_CF  | blue | na |
| chrUn | 19326106 | 19327803 | 1698 SAT1_CF | blue | na |
| chrUn | 19327815 | 19329061 | 1247 SAT1_CF | blue | na |
| chrUn | 19329205 | 19330116 | 912 SAT1_CF  | blue | na |
| chrUn | 19330195 | 19330684 | 490 SAT1_CF  | blue | na |
| chrUn | 19330695 | 19331872 | 1178 SAT1_CF | blue | na |
| chrUn | 19331884 | 19333296 | 1413 SAT1_CF | blue | na |
| chrUn | 19333319 | 19333790 | 472 SAT1_CF  | blue | na |
| chrUn | 19333850 | 19334030 | 181 SAT1_CF  | blue | na |
| chrUn | 19334210 | 19334412 | 203 SAT1_CF  | blue | na |
| chrUn | 19334455 | 19335830 | 1376 SAT1_CF | blue | na |
| chrUn | 19335881 | 19336044 | 164 SAT1_CF  | blue | na |
| chrUn | 19336056 | 19337374 | 1319 SAT1_CF | blue | na |
| chrUn | 19337397 | 19337502 | 106 SAT1_CF  | blue | na |
| chrUn | 19337515 | 19337995 | 481 SAT1_CF  | blue | na |
| chrUn | 19338051 | 19338236 | 186 SAT1_CF  | blue | na |
| chrUn | 19338417 | 19339209 | 793 SAT1_CF  | blue | na |
| chrUn | 19339289 | 19340460 | 1172 SAT1_CF | blue | na |
| chrUn | 19340472 | 19341141 | 670 SAT1_CF  | blue | na |
| chrUn | 19341166 | 19341668 | 503 SAT1_CF  | blue | na |
| chrUn | 19341755 | 19342133 | 379 SAT1_CF  | blue | na |
| chrUn | 19342156 | 19342262 | 107 SAT1_CF  | blue | na |
| chrUn | 19342275 | 19342819 | 545 SAT1_CF  | blue | na |
| chrUn | 19342896 | 19344789 | 1894 SAT1_CF | blue | na |
| chrUn | 19344837 | 19345714 | 878 SAT1_CF  | blue | na |
| chrUn | 19345739 | 19346279 | 541 SAT1_CF  | blue | na |
| chrUn | 19346376 | 19347053 | 678 SAT1_CF  | blue | na |
| chrUn | 19347065 | 19347748 | 684 SAT1_CF  | blue | na |
| chrUn | 19347761 | 19348262 | 502 SAT1_CF  | blue | na |
| chrUn | 19348302 | 19348671 | 370 SAT1_CF  | blue | na |
| chrUn | 19348714 | 19349237 | 524 SAT1_CF  | blue | na |
| chrUn | 19349269 | 19350929 | 1661 SAT1_CF | blue | na |
| chrUn | 19350993 | 19351180 | 188 SAT1_CF  | blue | na |
| chrUn | 19351193 | 19351713 | 521 SAT1_CF  | blue | na |
| chrUn | 19351780 | 19352072 | 293 SAT1_CF  | blue | na |
| chrUn | 19352130 | 19352671 | 542 SAT1_CF  | blue | na |

|       |          |          |              |      |    |
|-------|----------|----------|--------------|------|----|
| chrUn | 19352714 | 19353354 | 641 SAT1_CF  | blue | na |
| chrUn | 19353371 | 19354132 | 762 SAT1_CF  | blue | na |
| chrUn | 19354145 | 19354645 | 501 SAT1_CF  | blue | na |
| chrUn | 19354685 | 19355064 | 380 SAT1_CF  | blue | na |
| chrUn | 19355098 | 19355619 | 522 SAT1_CF  | blue | na |
| chrUn | 19355633 | 19356136 | 504 SAT1_CF  | blue | na |
| chrUn | 19356180 | 19356705 | 526 SAT1_CF  | blue | na |
| chrUn | 19356736 | 19357255 | 520 SAT1_CF  | blue | na |
| chrUn | 19357371 | 19357726 | 356 SAT1_CF  | blue | na |
| chrUn | 19357739 | 19359402 | 1664 SAT1_CF | blue | na |
| chrUn | 19359445 | 19360117 | 673 SAT1_CF  | blue | na |
| chrUn | 19360129 | 19360686 | 558 SAT1_CF  | blue | na |
| chrUn | 19360708 | 19360814 | 107 SAT1_CF  | blue | na |
| chrUn | 19360827 | 19361329 | 503 SAT1_CF  | blue | na |
| chrUn | 19361395 | 19361531 | 137 SAT1_CF  | blue | na |
| chrUn | 19361546 | 19362818 | 1273 SAT1_CF | blue | na |
| chrUn | 19362840 | 19365337 | 2498 SAT1_CF | blue | na |
| chrUn | 19365379 | 19366244 | 866 SAT1_CF  | blue | na |
| chrUn | 19366256 | 19366709 | 454 SAT1_CF  | blue | na |
| chrUn | 19366722 | 19367223 | 502 SAT1_CF  | blue | na |
| chrUn | 19367263 | 19368184 | 922 SAT1_CF  | blue | na |
| chrUn | 19368215 | 19369109 | 895 SAT1_CF  | blue | na |
| chrUn | 19369122 | 19369669 | 548 SAT1_CF  | blue | na |
| chrUn | 19369726 | 19370683 | 958 SAT1_CF  | blue | na |
| chrUn | 19370726 | 19372912 | 2187 SAT1_CF | blue | na |
| chrUn | 19372924 | 19373606 | 683 SAT1_CF  | blue | na |
| chrUn | 19373626 | 19374120 | 495 SAT1_CF  | blue | na |
| chrUn | 19374160 | 19374561 | 402 SAT1_CF  | blue | na |
| chrUn | 19374575 | 19374808 | 234 SAT1_CF  | blue | na |
| chrUn | 19374829 | 19375470 | 642 SAT1_CF  | blue | na |
| chrUn | 19375487 | 19375659 | 173 SAT1_CF  | blue | na |
| chrUn | 19375672 | 19376934 | 1263 SAT1_CF | blue | na |
| chrUn | 19376956 | 19377063 | 108 SAT1_CF  | blue | na |
| chrUn | 19377076 | 19377905 | 830 SAT1_CF  | blue | na |
| chrUn | 19377920 | 19379257 | 1338 SAT1_CF | blue | na |
| chrUn | 19379299 | 19379842 | 544 SAT1_CF  | blue | na |
| chrUn | 19379885 | 19380562 | 678 SAT1_CF  | blue | na |
| chrUn | 19380574 | 19381093 | 520 SAT1_CF  | blue | na |
| chrUn | 19381110 | 19381480 | 371 SAT1_CF  | blue | na |
| chrUn | 19381525 | 19382140 | 616 SAT1_CF  | blue | na |
| chrUn | 19382156 | 19382656 | 501 SAT1_CF  | blue | na |
| chrUn | 19382678 | 19384289 | 1612 SAT1_CF | blue | na |

|       |          |          |      |         |      |    |
|-------|----------|----------|------|---------|------|----|
| chrUn | 19384346 | 19384864 | 519  | SAT1_CF | blue | na |
| chrUn | 19384936 | 19385302 | 367  | SAT1_CF | blue | na |
| chrUn | 19385345 | 19386703 | 1359 | SAT1_CF | blue | na |
| chrUn | 19386715 | 19388747 | 2033 | SAT1_CF | blue | na |
| chrUn | 19388789 | 19389328 | 540  | SAT1_CF | blue | na |
| chrUn | 19389372 | 19390052 | 681  | SAT1_CF | blue | na |
| chrUn | 19390064 | 19390619 | 556  | SAT1_CF | blue | na |
| chrUn | 19390640 | 19390747 | 108  | SAT1_CF | blue | na |
| chrUn | 19390767 | 19391305 | 539  | SAT1_CF | blue | na |
| chrUn | 19391388 | 19393413 | 2026 | SAT1_CF | blue | na |
| chrUn | 19393456 | 19394130 | 675  | SAT1_CF | blue | na |
| chrUn | 19394143 | 19394662 | 520  | SAT1_CF | blue | na |
| chrUn | 19394688 | 19394844 | 157  | SAT1_CF | blue | na |
| chrUn | 19394877 | 19396048 | 1172 | SAT1_CF | blue | na |
| chrUn | 19396071 | 19396176 | 106  | SAT1_CF | blue | na |
| chrUn | 19396189 | 19396667 | 479  | SAT1_CF | blue | na |
| chrUn | 19396725 | 19397106 | 382  | SAT1_CF | blue | na |
| chrUn | 19397139 | 19397687 | 549  | SAT1_CF | blue | na |
| chrUn | 19397802 | 19398762 | 961  | SAT1_CF | blue | na |
| chrUn | 19398806 | 19399481 | 676  | SAT1_CF | blue | na |
| chrUn | 19399493 | 19400261 | 769  | SAT1_CF | blue | na |
| chrUn | 19400282 | 19400756 | 475  | SAT1_CF | blue | na |
| chrUn | 19400821 | 19401479 | 659  | SAT1_CF | blue | na |
| chrUn | 19401527 | 19402021 | 495  | SAT1_CF | blue | na |
| chrUn | 19405621 | 19406271 | 651  | SAT1_CF | blue | na |
| chrUn | 19406315 | 19407521 | 1207 | SAT1_CF | blue | na |
| chrUn | 19407591 | 19407973 | 383  | SAT1_CF | blue | na |
| chrUn | 19409252 | 19409784 | 533  | SAT1_CF | blue | na |
| chrUn | 19409802 | 19410304 | 503  | SAT1_CF | blue | na |
| chrUn | 19410348 | 19410506 | 159  | SAT1_CF | blue | na |
| chrUn | 19410572 | 19411622 | 1051 | SAT1_CF | blue | na |
| chrUn | 19411683 | 19413420 | 1738 | SAT1_CF | blue | na |
| chrUn | 19413463 | 19413862 | 400  | SAT1_CF | blue | na |
| chrUn | 19413873 | 19414382 | 510  | SAT1_CF | blue | na |
| chrUn | 19414413 | 19416000 | 1588 | SAT1_CF | blue | na |
| chrUn | 19416012 | 19416575 | 564  | SAT1_CF | blue | na |
| chrUn | 19416593 | 19416669 | 77   | SAT1_CF | blue | na |
| chrUn | 19416682 | 19417519 | 838  | SAT1_CF | blue | na |
| chrUn | 19417562 | 19418086 | 525  | SAT1_CF | blue | na |
| chrUn | 19418120 | 19418361 | 242  | SAT1_CF | blue | na |
| chrUn | 19418389 | 19418898 | 510  | SAT1_CF | blue | na |
| chrUn | 19418980 | 19419542 | 563  | SAT1_CF | blue | na |

|       |          |          |              |      |    |
|-------|----------|----------|--------------|------|----|
| chrUn | 19419570 | 19420202 | 633 SAT1_CF  | blue | na |
| chrUn | 19420245 | 19420788 | 544 SAT1_CF  | blue | na |
| chrUn | 19420822 | 19421769 | 948 SAT1_CF  | blue | na |
| chrUn | 19421797 | 19423716 | 1920 SAT1_CF | blue | na |
| chrUn | 19423742 | 19423899 | 158 SAT1_CF  | blue | na |
| chrUn | 19423914 | 19425237 | 1324 SAT1_CF | blue | na |
| chrUn | 19425260 | 19425731 | 472 SAT1_CF  | blue | na |
| chrUn | 19425805 | 19425972 | 168 SAT1_CF  | blue | na |
| chrUn | 19426152 | 19426386 | 235 SAT1_CF  | blue | na |
| chrUn | 19426400 | 19426942 | 543 SAT1_CF  | blue | na |
| chrUn | 19426964 | 19427771 | 808 SAT1_CF  | blue | na |
| chrUn | 19427813 | 19427985 | 173 SAT1_CF  | blue | na |
| chrUn | 19427997 | 19429367 | 1371 SAT1_CF | blue | na |
| chrUn | 19429380 | 19429880 | 501 SAT1_CF  | blue | na |
| chrUn | 19429922 | 19430880 | 959 SAT1_CF  | blue | na |
| chrUn | 19430937 | 19433061 | 2125 SAT1_CF | blue | na |
| chrUn | 19433104 | 19433921 | 818 SAT1_CF  | blue | na |
| chrUn | 19433963 | 19434752 | 790 SAT1_CF  | blue | na |
| chrUn | 19434773 | 19434881 | 109 SAT1_CF  | blue | na |
| chrUn | 19434894 | 19435597 | 704 SAT1_CF  | blue | na |
| chrUn | 19435649 | 19436241 | 593 SAT1_CF  | blue | na |
| chrUn | 19436252 | 19437887 | 1636 SAT1_CF | blue | na |
| chrUn | 19437930 | 19438605 | 676 SAT1_CF  | blue | na |
| chrUn | 19438618 | 19439100 | 483 SAT1_CF  | blue | na |
| chrUn | 19439160 | 19439527 | 368 SAT1_CF  | blue | na |
| chrUn | 19439570 | 19440456 | 887 SAT1_CF  | blue | na |
| chrUn | 19440471 | 19441015 | 545 SAT1_CF  | blue | na |
| chrUn | 19441056 | 19442673 | 1618 SAT1_CF | blue | na |
| chrUn | 19442707 | 19443180 | 474 SAT1_CF  | blue | na |
| chrUn | 19443240 | 19443641 | 402 SAT1_CF  | blue | na |
| chrUn | 19443652 | 19444262 | 611 SAT1_CF  | blue | na |
| chrUn | 19444278 | 19445261 | 984 SAT1_CF  | blue | na |
| chrUn | 19445310 | 19445855 | 546 SAT1_CF  | blue | na |
| chrUn | 19445868 | 19445984 | 117 SAT1_CF  | blue | na |
| chrUn | 19445996 | 19446667 | 672 SAT1_CF  | blue | na |
| chrUn | 19446690 | 19447191 | 502 SAT1_CF  | blue | na |
| chrUn | 19447257 | 19447393 | 137 SAT1_CF  | blue | na |
| chrUn | 19447421 | 19448650 | 1230 SAT1_CF | blue | na |
| chrUn | 19448694 | 19450143 | 1450 SAT1_CF | blue | na |
| chrUn | 19450882 | 19451153 | 272 SAT1_CF  | blue | na |
| chrUn | 19451180 | 19451682 | 503 SAT1_CF  | blue | na |
| chrUn | 19451748 | 19451884 | 137 SAT1_CF  | blue | na |



|       |          |          |              |      |    |
|-------|----------|----------|--------------|------|----|
| chrUn | 19451899 | 19453580 | 1682 SAT1_CF | blue | na |
| chrUn | 19453592 | 19454092 | 501 SAT1_CF  | blue | na |
| chrUn | 19454132 | 19454533 | 402 SAT1_CF  | blue | na |
| chrUn | 19454547 | 19455889 | 1343 SAT1_CF | blue | na |
| chrUn | 19455901 | 19456590 | 690 SAT1_CF  | blue | na |
| chrUn | 19456603 | 19457105 | 503 SAT1_CF  | blue | na |
| chrUn | 19457118 | 19457799 | 682 SAT1_CF  | blue | na |
| chrUn | 19457813 | 19458375 | 563 SAT1_CF  | blue | na |
| chrUn | 19458402 | 19459461 | 1060 SAT1_CF | blue | na |
| chrUn | 19459473 | 19460028 | 556 SAT1_CF  | blue | na |
| chrUn | 19460049 | 19460145 | 97 SAT1_CF   | blue | na |
| chrUn | 19460175 | 19460713 | 539 SAT1_CF  | blue | na |
| chrUn | 19460796 | 19462822 | 2027 SAT1_CF | blue | na |
| chrUn | 19462865 | 19463540 | 676 SAT1_CF  | blue | na |
| chrUn | 19463553 | 19464053 | 501 SAT1_CF  | blue | na |
| chrUn | 19464098 | 19464254 | 157 SAT1_CF  | blue | na |
| chrUn | 19464287 | 19465460 | 1174 SAT1_CF | blue | na |
| chrUn | 19465483 | 19465588 | 106 SAT1_CF  | blue | na |
| chrUn | 19465601 | 19466079 | 479 SAT1_CF  | blue | na |
| chrUn | 19466137 | 19468174 | 2038 SAT1_CF | blue | na |
| chrUn | 19468218 | 19468763 | 546 SAT1_CF  | blue | na |
| chrUn | 19468776 | 19468892 | 117 SAT1_CF  | blue | na |
| chrUn | 19468904 | 19469593 | 690 SAT1_CF  | blue | na |
| chrUn | 19469614 | 19470088 | 475 SAT1_CF  | blue | na |
| chrUn | 19470148 | 19470635 | 488 SAT1_CF  | blue | na |
| chrUn | 19471256 | 19473188 | 1933 SAT1_CF | blue | na |
| chrUn | 19473232 | 19473906 | 675 SAT1_CF  | blue | na |
| chrUn | 19473919 | 19474603 | 685 SAT1_CF  | blue | na |
| chrUn | 19474615 | 19475316 | 702 SAT1_CF  | blue | na |
| chrUn | 19475331 | 19476601 | 1271 SAT1_CF | blue | na |
| chrUn | 19476658 | 19477146 | 489 SAT1_CF  | blue | na |
| chrUn | 19477159 | 19477696 | 538 SAT1_CF  | blue | na |
| chrUn | 19477738 | 19478438 | 701 SAT1_CF  | blue | na |
| chrUn | 19478488 | 19479245 | 758 SAT1_CF  | blue | na |
| chrUn | 19479259 | 19479779 | 521 SAT1_CF  | blue | na |
| chrUn | 19479847 | 19480736 | 890 SAT1_CF  | blue | na |
| chrUn | 19480750 | 19482353 | 1604 SAT1_CF | blue | na |
| chrUn | 19482384 | 19482902 | 519 SAT1_CF  | blue | na |
| chrUn | 19483019 | 19483374 | 356 SAT1_CF  | blue | na |
| chrUn | 19483387 | 19484798 | 1412 SAT1_CF | blue | na |
| chrUn | 19484810 | 19485329 | 520 SAT1_CF  | blue | na |
| chrUn | 19485350 | 19485415 | 66 SAT1_CF   | blue | na |

|       |          |          |              |      |    |
|-------|----------|----------|--------------|------|----|
| chrUn | 19485435 | 19486192 | 758 SAT1_CF  | blue | na |
| chrUn | 19486209 | 19486710 | 502 SAT1_CF  | blue | na |
| chrUn | 19486750 | 19489159 | 2410 SAT1_CF | blue | na |
| chrUn | 19489216 | 19489735 | 520 SAT1_CF  | blue | na |
| chrUn | 19489817 | 19490131 | 315 SAT1_CF  | blue | na |
| chrUn | 19490143 | 19490772 | 630 SAT1_CF  | blue | na |
| chrUn | 19490839 | 19492660 | 1822 SAT1_CF | blue | na |
| chrUn | 19492675 | 19493199 | 525 SAT1_CF  | blue | na |
| chrUn | 19493242 | 19494280 | 1039 SAT1_CF | blue | na |
| chrUn | 19494322 | 19495113 | 792 SAT1_CF  | blue | na |
| chrUn | 19495136 | 19495242 | 107 SAT1_CF  | blue | na |
| chrUn | 19495255 | 19495775 | 521 SAT1_CF  | blue | na |
| chrUn | 19495801 | 19495958 | 158 SAT1_CF  | blue | na |
| chrUn | 19495991 | 19497244 | 1254 SAT1_CF | blue | na |
| chrUn | 19497308 | 19499530 | 2223 SAT1_CF | blue | na |
| chrUn | 19499587 | 19500541 | 955 SAT1_CF  | blue | na |
| chrUn | 19500586 | 19501110 | 525 SAT1_CF  | blue | na |
| chrUn | 19501131 | 19502030 | 900 SAT1_CF  | blue | na |
| chrUn | 19502072 | 19502931 | 860 SAT1_CF  | blue | na |
| chrUn | 19502943 | 19503613 | 671 SAT1_CF  | blue | na |
| chrUn | 19503638 | 19504140 | 503 SAT1_CF  | blue | na |
| chrUn | 19504206 | 19504342 | 137 SAT1_CF  | blue | na |
| chrUn | 19504357 | 19504879 | 523 SAT1_CF  | blue | na |
| chrUn | 19504911 | 19505998 | 1088 SAT1_CF | blue | na |
| chrUn | 19506075 | 19507924 | 1850 SAT1_CF | blue | na |
| chrUn | 19507936 | 19508538 | 603 SAT1_CF  | blue | na |
| chrUn | 19508558 | 19509186 | 629 SAT1_CF  | blue | na |
| chrUn | 19509369 | 19509699 | 331 SAT1_CF  | blue | na |
| chrUn | 19509712 | 19510232 | 521 SAT1_CF  | blue | na |
| chrUn | 19510299 | 19511845 | 1547 SAT1_CF | blue | na |
| chrUn | 19511859 | 19512398 | 540 SAT1_CF  | blue | na |
| chrUn | 19512441 | 19513117 | 677 SAT1_CF  | blue | na |
| chrUn | 19513129 | 19513744 | 616 SAT1_CF  | blue | na |
| chrUn | 19513761 | 19515158 | 1398 SAT1_CF | blue | na |
| chrUn | 19515172 | 19515651 | 480 SAT1_CF  | blue | na |
| chrUn | 19515714 | 19517091 | 1378 SAT1_CF | blue | na |
| chrUn | 19517135 | 19518465 | 1331 SAT1_CF | blue | na |
| chrUn | 19518477 | 19519123 | 647 SAT1_CF  | blue | na |
| chrUn | 19519136 | 19519898 | 763 SAT1_CF  | blue | na |
| chrUn | 19519910 | 19520438 | 529 SAT1_CF  | blue | na |
| chrUn | 19520461 | 19520567 | 107 SAT1_CF  | blue | na |
| chrUn | 19520580 | 19521123 | 544 SAT1_CF  | blue | na |

|       |          |          |              |      |    |
|-------|----------|----------|--------------|------|----|
| chrUn | 19521150 | 19521970 | 821 SAT1_CF  | blue | na |
| chrUn | 19521995 | 19522536 | 542 SAT1_CF  | blue | na |
| chrUn | 19522633 | 19523310 | 678 SAT1_CF  | blue | na |
| chrUn | 19523322 | 19523877 | 556 SAT1_CF  | blue | na |
| chrUn | 19523898 | 19524006 | 109 SAT1_CF  | blue | na |
| chrUn | 19524019 | 19524500 | 482 SAT1_CF  | blue | na |
| chrUn | 19524521 | 19524919 | 399 SAT1_CF  | blue | na |
| chrUn | 19524932 | 19526082 | 1151 SAT1_CF | blue | na |
| chrUn | 19526095 | 19526576 | 482 SAT1_CF  | blue | na |
| chrUn | 19526597 | 19526996 | 400 SAT1_CF  | blue | na |
| chrUn | 19527009 | 19528162 | 1154 SAT1_CF | blue | na |
| chrUn | 19528175 | 19528676 | 502 SAT1_CF  | blue | na |
| chrUn | 19528742 | 19528878 | 137 SAT1_CF  | blue | na |
| chrUn | 19528910 | 19529415 | 506 SAT1_CF  | blue | na |
| chrUn | 19529447 | 19530666 | 1220 SAT1_CF | blue | na |
| chrUn | 19530711 | 19530868 | 158 SAT1_CF  | blue | na |
| chrUn | 19530883 | 19531407 | 525 SAT1_CF  | blue | na |
| chrUn | 19531487 | 19532161 | 675 SAT1_CF  | blue | na |
| chrUn | 19532175 | 19532728 | 554 SAT1_CF  | blue | na |
| chrUn | 19532751 | 19532856 | 106 SAT1_CF  | blue | na |
| chrUn | 19532868 | 19533370 | 503 SAT1_CF  | blue | na |
| chrUn | 19533383 | 19534591 | 1209 SAT1_CF | blue | na |
| chrUn | 19534657 | 19536150 | 1494 SAT1_CF | blue | na |
| chrUn | 19536163 | 19536665 | 503 SAT1_CF  | blue | na |
| chrUn | 19536701 | 19537589 | 889 SAT1_CF  | blue | na |
| chrUn | 19537600 | 19537826 | 227 SAT1_CF  | blue | na |
| chrUn | 19537906 | 19538559 | 654 SAT1_CF  | blue | na |
| chrUn | 19538571 | 19540249 | 1679 SAT1_CF | blue | na |
| chrUn | 19540265 | 19541604 | 1340 SAT1_CF | blue | na |
| chrUn | 19541617 | 19542119 | 503 SAT1_CF  | blue | na |
| chrUn | 19542165 | 19542491 | 327 SAT1_CF  | blue | na |
| chrUn | 19542571 | 19543652 | 1082 SAT1_CF | blue | na |
| chrUn | 19543674 | 19544200 | 527 SAT1_CF  | blue | na |
| chrUn | 19544243 | 19544909 | 667 SAT1_CF  | blue | na |
| chrUn | 19544932 | 19545542 | 611 SAT1_CF  | blue | na |
| chrUn | 19545553 | 19546106 | 554 SAT1_CF  | blue | na |
| chrUn | 19546149 | 19546674 | 526 SAT1_CF  | blue | na |
| chrUn | 19546739 | 19548106 | 1368 SAT1_CF | blue | na |
| chrUn | 19548118 | 19549622 | 1505 SAT1_CF | blue | na |
| chrUn | 19549640 | 19550400 | 761 SAT1_CF  | blue | na |
| chrUn | 19550413 | 19552114 | 1702 SAT1_CF | blue | na |
| chrUn | 19552375 | 19553206 | 832 SAT1_CF  | blue | na |

|       |          |          |              |        |    |
|-------|----------|----------|--------------|--------|----|
| chrUn | 19553249 | 19553796 | 548 SAT1_CF  | blue   | na |
| chrUn | 19553817 | 19553926 | 110 SAT1_CF  | blue   | na |
| chrUn | 19553938 | 19554260 | 323 SAT1_CF  | blue   | na |
| chrUn | 19554339 | 19555057 | 719 SAT1_CF  | blue   | na |
| chrUn | 19555069 | 19555751 | 683 SAT1_CF  | blue   | na |
| chrUn | 19555765 | 19556446 | 682 SAT1_CF  | blue   | na |
| chrUn | 19556460 | 19556961 | 502 SAT1_CF  | blue   | na |
| chrUn | 19557048 | 19557375 | 328 SAT1_CF  | blue   | na |
| chrUn | 19557413 | 19557958 | 546 SAT1_CF  | blue   | na |
| chrUn | 19558036 | 19559002 | 967 SAT1_CF  | blue   | na |
| chrUn | 19559045 | 19559719 | 675 SAT1_CF  | blue   | na |
| chrUn | 19559731 | 19560285 | 555 SAT1_CF  | blue   | na |
| chrUn | 19560306 | 19560928 | 623 SAT1_CF  | blue   | na |
| chrUn | 19560968 | 19563536 | 2569 SAT1_CF | blue   | na |
| chrUn | 19563549 | 19564178 | 630 SAT1_CF  | blue   | na |
| chrUn | 19564234 | 19565937 | 1704 SAT1_CF | blue   | na |
| chrUn | 19565992 | 19566580 | 589 SAT1_CF  | blue   | na |
| chrUn | 19566593 | 19569509 | 2917 SAT1_CF | blue   | na |
| chrUn | 19569540 | 19571065 | 1526 SAT1_CF | blue   | na |
| chrUn | 19571114 | 19571788 | 675 SAT1_CF  | blue   | na |
| chrUn | 19571800 | 19572346 | 547 SAT1_CF  | blue   | na |
| chrUn | 19572375 | 19572616 | 242 SAT1_CF  | blue   | na |
| chrUn | 19572644 | 19573191 | 548 SAT1_CF  | blue   | na |
| chrUn | 19573234 | 19574309 | 1076 SAT1_CF | blue   | na |
| chrUn | 19574352 | 19575210 | 859 SAT1_CF  | blue   | na |
| chrUn | 19575222 | 19575967 | 746 SAT1_CF  | blue   | na |
| chrUn | 19575994 | 19576495 | 502 SAT1_CF  | blue   | na |
| chrUn | 19576540 | 19576697 | 158 SAT1_CF  | blue   | na |
| chrUn | 19576712 | 19577237 | 526 SAT1_CF  | blue   | na |
| chrUn | 19577285 | 19577950 | 666 SAT1_CF  | blue   | na |
| chrUn | 19577976 | 19578477 | 502 SAT1_CF  | blue   | na |
| chrUn | 19578523 | 19579160 | 638 SAT1_CF  | blue   | na |
| chrUn | 19579175 | 19581909 | 2735 SAT1_CF | blue   | na |
| chrUn | 19581921 | 19582480 | 560 SAT1_CF  | blue   | na |
| chrUn | 19582499 | 19582607 | 109 SAT1_CF  | blue   | na |
| chrUn | 19582620 | 19583140 | 521 SAT1_CF  | blue   | na |
| chrUn | 19583157 | 19583342 | 186 SAT1_CF  | blue   | na |
| chrUn | 19583524 | 19583689 | 166 SAT1_CF  | blue   | na |
| chrUn | 19583731 | 19584701 | 971 SAT1_CF  | blue   | na |
| chrUn | 19586084 | 19586686 | 603 CarSat1  | red    | na |
| chrUn | 19586679 | 19587555 | 877 SAT1_CF  | blue   | na |
| chrUn | 19587785 | 19588794 | 1010 Sat2CF  | purple | na |

|       |          |          |              |        |    |
|-------|----------|----------|--------------|--------|----|
| chrUn | 19592318 | 19592478 | 161 SAT1_CF  | blue   | na |
| chrUn | 19592509 | 19593047 | 539 SAT1_CF  | blue   | na |
| chrUn | 19593090 | 19594159 | 1070 SAT1_CF | blue   | na |
| chrUn | 19594162 | 19595402 | 1241 CarSat1 | red    | na |
| chrUn | 19595423 | 19596219 | 797 CarSat1  | red    | na |
| chrUn | 19596245 | 19596958 | 714 CarSat1  | red    | na |
| chrUn | 19596976 | 19597689 | 714 CarSat1  | red    | na |
| chrUn | 19597714 | 19598491 | 778 CarSat1  | red    | na |
| chrUn | 19598512 | 19599959 | 1448 CarSat1 | red    | na |
| chrUn | 19600118 | 19600823 | 706 CarSat1  | red    | na |
| chrUn | 19622681 | 19623615 | 935 Sat2CF   | purple | na |
| chrUn | 19622744 | 19623534 | 791 Sat2CF   | purple | na |
| chrUn | 19641577 | 19642315 | 739 Sat2CF   | purple | na |
| chrUn | 19641654 | 19642659 | 1006 Sat2CF  | purple | na |
| chrUn | 19660637 | 19661454 | 818 Sat2CF   | purple | na |
| chrUn | 19660711 | 19661438 | 728 Sat2CF   | purple | na |
| chrUn | 19684299 | 19684529 | 231 Sat2CF   | purple | na |
| chrUn | 19684772 | 19684995 | 224 Sat2CF   | purple | na |
| chrUn | 19716811 | 19717945 | 1135 Sat2CF  | purple | na |
| chrUn | 19716945 | 19718030 | 1086 Sat2CF  | purple | na |
| chrUn | 19717906 | 19718055 | 150 Sat2CF   | purple | na |
| chrUn | 19771356 | 19772563 | 1208 Sat2CF  | purple | na |
| chrUn | 19772434 | 19772583 | 150 Sat2CF   | purple | na |
| chrUn | 19787224 | 19788368 | 1145 Sat2CF  | purple | na |
| chrUn | 19787228 | 19788497 | 1270 Sat2CF  | purple | na |
| chrUn | 19852681 | 19853932 | 1252 Sat2CF  | purple | na |
| chrUn | 19852811 | 19853896 | 1086 Sat2CF  | purple | na |
| chrUn | 19856432 | 19857779 | 1348 CarSat1 | red    | na |
| chrUn | 19861657 | 19862346 | 690 CarSat1  | red    | na |
| chrUn | 19862357 | 19863202 | 846 CarSat1  | red    | na |
| chrUn | 19863405 | 19863995 | 591 CarSat1  | red    | na |
| chrUn | 19872820 | 19873531 | 712 CarSat1  | red    | na |
| chrUn | 19873726 | 19874824 | 1099 CarSat1 | red    | na |
| chrUn | 19874853 | 19875343 | 491 CarSat1  | red    | na |
| chrUn | 19875376 | 19876808 | 1433 CarSat1 | red    | na |
| chrUn | 19876833 | 19878278 | 1446 CarSat1 | red    | na |
| chrUn | 19878311 | 19878477 | 167 CarSat1  | red    | na |
| chrUn | 19878671 | 19879960 | 1290 CarSat1 | red    | na |
| chrUn | 19879995 | 19880585 | 591 CarSat1  | red    | na |
| chrUn | 19880767 | 19881634 | 868 CarSat1  | red    | na |
| chrUn | 19881667 | 19881845 | 179 CarSat1  | red    | na |
| chrUn | 19882045 | 19883532 | 1488 CarSat1 | red    | na |

|       |          |          |      |         |        |    |
|-------|----------|----------|------|---------|--------|----|
| chrUn | 19883571 | 19885000 | 1430 | CarSat1 | red    | na |
| chrUn | 19885038 | 19886177 | 1140 | CarSat1 | red    | na |
| chrUn | 19892814 | 19894034 | 1221 | Sat2CF  | purple | na |
| chrUn | 19893617 | 19893981 | 365  | Sat2CF  | purple | na |
| chrUn | 19923513 | 19924729 | 1217 | Sat2CF  | purple | na |
| chrUn | 19923641 | 19924724 | 1084 | Sat2CF  | purple | na |
| chrUn | 19924600 | 19924749 | 150  | Sat2CF  | purple | na |
| chrUn | 19948093 | 19949175 | 1083 | Sat2CF  | purple | na |
| chrUn | 19948224 | 19949166 | 943  | Sat2CF  | purple | na |
| chrUn | 19949051 | 19949228 | 178  | Sat2CF  | purple | na |
| chrUn | 19951686 | 19951825 | 140  | CarSat1 | red    | na |
| chrUn | 19951847 | 19953227 | 1381 | CarSat1 | red    | na |
| chrUn | 19953224 | 19953275 | 52   | SAT1_CF | blue   | na |
| chrUn | 19953306 | 19953434 | 129  | SAT1_CF | blue   | na |
| chrUn | 19953452 | 19954314 | 863  | SAT1_CF | blue   | na |
| chrUn | 19954509 | 19955621 | 1113 | Sat2CF  | purple | na |
| chrUn | 19954561 | 19955556 | 996  | Sat2CF  | purple | na |
| chrUn | 19961364 | 19962048 | 685  | CarSat1 | red    | na |
| chrUn | 19962066 | 19963578 | 1513 | CarSat1 | red    | na |
| chrUn | 19963605 | 19965088 | 1484 | CarSat1 | red    | na |
| chrUn | 19973653 | 19975978 | 2326 | CarSat1 | red    | na |
| chrUn | 19976003 | 19979409 | 3407 | CarSat1 | red    | na |
| chrUn | 19979430 | 19980142 | 713  | CarSat1 | red    | na |
| chrUn | 19980163 | 19981127 | 965  | CarSat1 | red    | na |
| chrUn | 19981153 | 19981214 | 62   | CarSat1 | red    | na |
| chrUn | 19981404 | 19982800 | 1397 | CarSat1 | red    | na |
| chrUn | 19982826 | 19984022 | 1197 | CarSat1 | red    | na |
| chrUn | 19984043 | 19984755 | 713  | CarSat1 | red    | na |
| chrUn | 19984780 | 19986046 | 1267 | CarSat1 | red    | na |
| chrUn | 19987071 | 19987871 | 801  | SAT1_CF | blue   | na |
| chrUn | 19987883 | 19988733 | 851  | SAT1_CF | blue   | na |
| chrUn | 19988746 | 19988805 | 60   | SAT1_CF | blue   | na |
| chrUn | 19988818 | 19990638 | 1821 | SAT1_CF | blue   | na |
| chrUn | 19990678 | 19991179 | 502  | SAT1_CF | blue   | na |
| chrUn | 19991196 | 19991953 | 758  | SAT1_CF | blue   | na |
| chrUn | 19991966 | 19992579 | 614  | SAT1_CF | blue   | na |
| chrUn | 19992591 | 19993260 | 670  | SAT1_CF | blue   | na |
| chrUn | 19993307 | 19993528 | 222  | SAT1_CF | blue   | na |
| chrUn | 19994976 | 19996292 | 1317 | SAT1_CF | blue   | na |
| chrUn | 19997778 | 19998308 | 531  | SAT1_CF | blue   | na |
| chrUn | 19998376 | 19998897 | 522  | SAT1_CF | blue   | na |
| chrUn | 19998924 | 19999013 | 90   | SAT1_CF | blue   | na |

|       |          |          |              |      |    |
|-------|----------|----------|--------------|------|----|
| chrUn | 19999037 | 19999640 | 604 SAT1_CF  | blue | na |
| chrUn | 19999662 | 20000446 | 785 SAT1_CF  | blue | na |
| chrUn | 20000490 | 20001401 | 912 SAT1_CF  | blue | na |
| chrUn | 20001469 | 20001988 | 520 SAT1_CF  | blue | na |
| chrUn | 20002001 | 20002979 | 979 SAT1_CF  | blue | na |
| chrUn | 20002991 | 20003630 | 640 SAT1_CF  | blue | na |
| chrUn | 20003673 | 20004198 | 526 SAT1_CF  | blue | na |
| chrUn | 20004213 | 20004349 | 137 SAT1_CF  | blue | na |
| chrUn | 20004396 | 20004913 | 518 SAT1_CF  | blue | na |
| chrUn | 20004925 | 20005596 | 672 SAT1_CF  | blue | na |
| chrUn | 20005639 | 20006712 | 1074 SAT1_CF | blue | na |
| chrUn | 20006743 | 20007254 | 512 SAT1_CF  | blue | na |
| chrUn | 20007297 | 20007915 | 619 SAT1_CF  | blue | na |
| chrUn | 20007927 | 20008782 | 856 SAT1_CF  | blue | na |
| chrUn | 20008862 | 20010670 | 1809 SAT1_CF | blue | na |
| chrUn | 20010723 | 20011224 | 502 SAT1_CF  | blue | na |
| chrUn | 20011237 | 20012752 | 1516 SAT1_CF | blue | na |
| chrUn | 20012794 | 20013338 | 545 SAT1_CF  | blue | na |
| chrUn | 20013354 | 20015064 | 1711 SAT1_CF | blue | na |
| chrUn | 20015086 | 20015577 | 492 SAT1_CF  | blue | na |
| chrUn | 20015590 | 20015753 | 164 SAT1_CF  | blue | na |
| chrUn | 20015792 | 20016052 | 261 SAT1_CF  | blue | na |
| chrUn | 20016072 | 20016555 | 484 SAT1_CF  | blue | na |
| chrUn | 20016567 | 20017252 | 686 SAT1_CF  | blue | na |
| chrUn | 20017270 | 20017940 | 671 SAT1_CF  | blue | na |
| chrUn | 20017983 | 20019966 | 1984 SAT1_CF | blue | na |
| chrUn | 20020073 | 20020555 | 483 SAT1_CF  | blue | na |
| chrUn | 20020568 | 20020674 | 107 SAT1_CF  | blue | na |
| chrUn | 20020697 | 20022700 | 2004 SAT1_CF | blue | na |
| chrUn | 20022712 | 20023392 | 681 SAT1_CF  | blue | na |
| chrUn | 20023435 | 20024806 | 1372 SAT1_CF | blue | na |
| chrUn | 20024850 | 20025651 | 802 SAT1_CF  | blue | na |
| chrUn | 20025664 | 20026267 | 604 SAT1_CF  | blue | na |
| chrUn | 20026279 | 20027977 | 1699 SAT1_CF | blue | na |
| chrUn | 20028056 | 20028707 | 652 SAT1_CF  | blue | na |
| chrUn | 20028719 | 20029038 | 320 SAT1_CF  | blue | na |
| chrUn | 20029072 | 20029579 | 508 SAT1_CF  | blue | na |
| chrUn | 20029599 | 20030243 | 645 SAT1_CF  | blue | na |
| chrUn | 20030288 | 20030918 | 631 SAT1_CF  | blue | na |
| chrUn | 20030946 | 20031507 | 562 SAT1_CF  | blue | na |
| chrUn | 20031587 | 20032095 | 509 SAT1_CF  | blue | na |
| chrUn | 20032123 | 20032256 | 134 SAT1_CF  | blue | na |

|       |          |          |      |         |      |    |
|-------|----------|----------|------|---------|------|----|
| chrUn | 20032314 | 20033511 | 1198 | SAT1_CF | blue | na |
| chrUn | 20033523 | 20034189 | 667  | SAT1_CF | blue | na |
| chrUn | 20034231 | 20035196 | 966  | SAT1_CF | blue | na |
| chrUn | 20035241 | 20036193 | 953  | SAT1_CF | blue | na |
| chrUn | 20036217 | 20036738 | 522  | SAT1_CF | blue | na |
| chrUn | 20036750 | 20036851 | 102  | SAT1_CF | blue | na |
| chrUn | 20036879 | 20037434 | 556  | SAT1_CF | blue | na |
| chrUn | 20037446 | 20037555 | 110  | SAT1_CF | blue | na |
| chrUn | 20037575 | 20041018 | 3444 | SAT1_CF | blue | na |
| chrUn | 20041061 | 20041560 | 500  | SAT1_CF | blue | na |
| chrUn | 20041572 | 20041682 | 111  | SAT1_CF | blue | na |
| chrUn | 20041702 | 20042227 | 526  | SAT1_CF | blue | na |
| chrUn | 20042284 | 20042830 | 547  | SAT1_CF | blue | na |
| chrUn | 20042843 | 20043013 | 171  | SAT1_CF | blue | na |
| chrUn | 20043054 | 20044900 | 1847 | SAT1_CF | blue | na |
| chrUn | 20044933 | 20045451 | 519  | SAT1_CF | blue | na |
| chrUn | 20045463 | 20046324 | 862  | SAT1_CF | blue | na |
| chrUn | 20046366 | 20047953 | 1588 | SAT1_CF | blue | na |
| chrUn | 20047965 | 20048793 | 829  | SAT1_CF | blue | na |
| chrUn | 20049037 | 20050434 | 1398 | SAT1_CF | blue | na |
| chrUn | 20050479 | 20051026 | 548  | SAT1_CF | blue | na |
| chrUn | 20051066 | 20051976 | 911  | SAT1_CF | blue | na |
| chrUn | 20052000 | 20053063 | 1064 | SAT1_CF | blue | na |
| chrUn | 20053094 | 20053419 | 326  | SAT1_CF | blue | na |
| chrUn | 20054471 | 20056227 | 1757 | SAT1_CF | blue | na |
| chrUn | 20056344 | 20056907 | 564  | SAT1_CF | blue | na |
| chrUn | 20056949 | 20057731 | 783  | SAT1_CF | blue | na |
| chrUn | 20057775 | 20058319 | 545  | SAT1_CF | blue | na |
| chrUn | 20058332 | 20058689 | 358  | SAT1_CF | blue | na |
| chrUn | 20058706 | 20059227 | 522  | SAT1_CF | blue | na |
| chrUn | 20059240 | 20059913 | 674  | SAT1_CF | blue | na |
| chrUn | 20059961 | 20061928 | 1968 | SAT1_CF | blue | na |
| chrUn | 20062045 | 20063873 | 1829 | SAT1_CF | blue | na |
| chrUn | 20063990 | 20064570 | 581  | SAT1_CF | blue | na |
| chrUn | 20064657 | 20065157 | 501  | SAT1_CF | blue | na |
| chrUn | 20065170 | 20065818 | 649  | SAT1_CF | blue | na |
| chrUn | 20065861 | 20066693 | 833  | SAT1_CF | blue | na |
| chrUn | 20066884 | 20067596 | 713  | SAT1_CF | blue | na |
| chrUn | 20067676 | 20068160 | 485  | SAT1_CF | blue | na |
| chrUn | 20068194 | 20068727 | 534  | SAT1_CF | blue | na |
| chrUn | 20068745 | 20070395 | 1651 | SAT1_CF | blue | na |
| chrUn | 20070407 | 20071773 | 1367 | SAT1_CF | blue | na |



|       |          |          |              |      |    |
|-------|----------|----------|--------------|------|----|
| chrUn | 20071800 | 20073109 | 1310 SAT1_CF | blue | na |
| chrUn | 20073149 | 20073651 | 503 SAT1_CF  | blue | na |
| chrUn | 20073678 | 20073859 | 182 SAT1_CF  | blue | na |
| chrUn | 20073875 | 20074420 | 546 SAT1_CF  | blue | na |
| chrUn | 20074462 | 20075006 | 545 SAT1_CF  | blue | na |
| chrUn | 20075022 | 20075170 | 149 SAT1_CF  | blue | na |
| chrUn | 20075195 | 20076620 | 1426 SAT1_CF | blue | na |
| chrUn | 20076632 | 20077285 | 654 SAT1_CF  | blue | na |
| chrUn | 20077373 | 20077590 | 218 SAT1_CF  | blue | na |
| chrUn | 20077601 | 20078144 | 544 SAT1_CF  | blue | na |
| chrUn | 20078155 | 20078473 | 319 SAT1_CF  | blue | na |
| chrUn | 20078526 | 20079028 | 503 SAT1_CF  | blue | na |
| chrUn | 20079041 | 20079144 | 104 SAT1_CF  | blue | na |
| chrUn | 20079170 | 20079880 | 711 SAT1_CF  | blue | na |
| chrUn | 20079892 | 20081155 | 1264 SAT1_CF | blue | na |
| chrUn | 20081205 | 20082133 | 929 SAT1_CF  | blue | na |
| chrUn | 20082175 | 20082842 | 668 SAT1_CF  | blue | na |
| chrUn | 20082908 | 20084092 | 1185 SAT1_CF | blue | na |
| chrUn | 20084150 | 20084627 | 478 SAT1_CF  | blue | na |
| chrUn | 20084639 | 20084744 | 106 SAT1_CF  | blue | na |
| chrUn | 20084767 | 20085327 | 561 SAT1_CF  | blue | na |
| chrUn | 20085369 | 20086644 | 1276 SAT1_CF | blue | na |
| chrUn | 20086682 | 20087544 | 863 SAT1_CF  | blue | na |
| chrUn | 20087555 | 20087910 | 356 SAT1_CF  | blue | na |
| chrUn | 20087997 | 20088498 | 502 SAT1_CF  | blue | na |
| chrUn | 20088525 | 20089268 | 744 SAT1_CF  | blue | na |
| chrUn | 20089282 | 20090767 | 1486 SAT1_CF | blue | na |
| chrUn | 20090844 | 20092000 | 1157 SAT1_CF | blue | na |
| chrUn | 20092080 | 20092604 | 525 SAT1_CF  | blue | na |
| chrUn | 20092619 | 20092776 | 158 SAT1_CF  | blue | na |
| chrUn | 20092821 | 20093323 | 503 SAT1_CF  | blue | na |
| chrUn | 20093336 | 20094665 | 1330 SAT1_CF | blue | na |
| chrUn | 20094740 | 20095938 | 1199 SAT1_CF | blue | na |
| chrUn | 20095966 | 20096102 | 137 SAT1_CF  | blue | na |
| chrUn | 20096168 | 20096669 | 502 SAT1_CF  | blue | na |
| chrUn | 20096692 | 20097363 | 672 SAT1_CF  | blue | na |
| chrUn | 20097375 | 20097490 | 116 SAT1_CF  | blue | na |
| chrUn | 20097503 | 20099705 | 2203 SAT1_CF | blue | na |
| chrUn | 20099716 | 20100118 | 403 SAT1_CF  | blue | na |
| chrUn | 20100178 | 20100653 | 476 SAT1_CF  | blue | na |
| chrUn | 20100673 | 20101434 | 762 SAT1_CF  | blue | na |
| chrUn | 20101446 | 20103232 | 1787 SAT1_CF | blue | na |

|       |          |          |              |      |    |
|-------|----------|----------|--------------|------|----|
| chrUn | 20103275 | 20103638 | 364 SAT1_CF  | blue | na |
| chrUn | 20103665 | 20104185 | 521 SAT1_CF  | blue | na |
| chrUn | 20104198 | 20104299 | 102 SAT1_CF  | blue | na |
| chrUn | 20104327 | 20104901 | 575 SAT1_CF  | blue | na |
| chrUn | 20104913 | 20106213 | 1301 SAT1_CF | blue | na |
| chrUn | 20106310 | 20107006 | 697 SAT1_CF  | blue | na |
| chrUn | 20107071 | 20107207 | 137 SAT1_CF  | blue | na |
| chrUn | 20107273 | 20107773 | 501 SAT1_CF  | blue | na |
| chrUn | 20107794 | 20108467 | 674 SAT1_CF  | blue | na |
| chrUn | 20108479 | 20109158 | 680 SAT1_CF  | blue | na |
| chrUn | 20109201 | 20110195 | 995 SAT1_CF  | blue | na |
| chrUn | 20110239 | 20111480 | 1242 SAT1_CF | blue | na |
| chrUn | 20111524 | 20112073 | 550 SAT1_CF  | blue | na |
| chrUn | 20112116 | 20112746 | 631 SAT1_CF  | blue | na |
| chrUn | 20112773 | 20113335 | 563 SAT1_CF  | blue | na |
| chrUn | 20113415 | 20114991 | 1577 SAT1_CF | blue | na |
| chrUn | 20115003 | 20116791 | 1789 SAT1_CF | blue | na |
| chrUn | 20116834 | 20117036 | 203 SAT1_CF  | blue | na |
| chrUn | 20117217 | 20117398 | 182 SAT1_CF  | blue | na |
| chrUn | 20117419 | 20117937 | 519 SAT1_CF  | blue | na |
| chrUn | 20117950 | 20118055 | 106 SAT1_CF  | blue | na |
| chrUn | 20118078 | 20119774 | 1697 SAT1_CF | blue | na |
| chrUn | 20119787 | 20119892 | 106 SAT1_CF  | blue | na |
| chrUn | 20119915 | 20120546 | 632 SAT1_CF  | blue | na |
| chrUn | 20120558 | 20121240 | 683 SAT1_CF  | blue | na |
| chrUn | 20121252 | 20121851 | 600 SAT1_CF  | blue | na |
| chrUn | 20121871 | 20122180 | 310 SAT1_CF  | blue | na |
| chrUn | 20122193 | 20122839 | 647 SAT1_CF  | blue | na |
| chrUn | 20122851 | 20123666 | 816 SAT1_CF  | blue | na |
| chrUn | 20123696 | 20124222 | 527 SAT1_CF  | blue | na |
| chrUn | 20124285 | 20124424 | 140 SAT1_CF  | blue | na |
| chrUn | 20124437 | 20124932 | 496 SAT1_CF  | blue | na |
| chrUn | 20124952 | 20126534 | 1583 SAT1_CF | blue | na |
| chrUn | 20126650 | 20127250 | 601 SAT1_CF  | blue | na |
| chrUn | 20127394 | 20127700 | 307 SAT1_CF  | blue | na |
| chrUn | 20127816 | 20128692 | 877 SAT1_CF  | blue | na |
| chrUn | 20128779 | 20129280 | 502 SAT1_CF  | blue | na |
| chrUn | 20129293 | 20129897 | 605 SAT1_CF  | blue | na |
| chrUn | 20129909 | 20130018 | 110 SAT1_CF  | blue | na |
| chrUn | 20130039 | 20130670 | 632 SAT1_CF  | blue | na |
| chrUn | 20130683 | 20131288 | 606 SAT1_CF  | blue | na |
| chrUn | 20131300 | 20131409 | 110 SAT1_CF  | blue | na |

|       |          |          |              |      |    |
|-------|----------|----------|--------------|------|----|
| chrUn | 20131430 | 20132059 | 630 SAT1_CF  | blue | na |
| chrUn | 20132073 | 20133405 | 1333 SAT1_CF | blue | na |
| chrUn | 20133449 | 20134416 | 968 SAT1_CF  | blue | na |
| chrUn | 20134427 | 20134827 | 401 SAT1_CF  | blue | na |
| chrUn | 20134867 | 20135369 | 503 SAT1_CF  | blue | na |
| chrUn | 20135382 | 20136057 | 676 SAT1_CF  | blue | na |
| chrUn | 20136100 | 20137087 | 988 SAT1_CF  | blue | na |
| chrUn | 20137115 | 20138114 | 1000 SAT1_CF | blue | na |
| chrUn | 20138149 | 20140756 | 2608 SAT1_CF | blue | na |
| chrUn | 20140796 | 20141296 | 501 SAT1_CF  | blue | na |
| chrUn | 20141309 | 20142863 | 1555 SAT1_CF | blue | na |
| chrUn | 20142906 | 20143529 | 624 SAT1_CF  | blue | na |
| chrUn | 20143616 | 20143714 | 99 SAT1_CF   | blue | na |
| chrUn | 20143762 | 20144278 | 517 SAT1_CF  | blue | na |
| chrUn | 20144301 | 20144967 | 667 SAT1_CF  | blue | na |
| chrUn | 20145009 | 20145640 | 632 SAT1_CF  | blue | na |
| chrUn | 20145668 | 20146232 | 565 SAT1_CF  | blue | na |
| chrUn | 20146312 | 20146837 | 526 SAT1_CF  | blue | na |
| chrUn | 20146852 | 20147661 | 810 SAT1_CF  | blue | na |
| chrUn | 20147691 | 20148319 | 629 SAT1_CF  | blue | na |
| chrUn | 20148343 | 20149204 | 862 SAT1_CF  | blue | na |
| chrUn | 20149222 | 20149907 | 686 SAT1_CF  | blue | na |
| chrUn | 20149919 | 20151963 | 2045 SAT1_CF | blue | na |
| chrUn | 20152006 | 20152494 | 489 SAT1_CF  | blue | na |
| chrUn | 20152546 | 20152682 | 137 SAT1_CF  | blue | na |
| chrUn | 20152729 | 20153334 | 606 SAT1_CF  | blue | na |
| chrUn | 20153389 | 20153903 | 515 SAT1_CF  | blue | na |
| chrUn | 20153916 | 20154008 | 93 SAT1_CF   | blue | na |
| chrUn | 20154019 | 20156650 | 2632 SAT1_CF | blue | na |
| chrUn | 20156663 | 20158682 | 2020 SAT1_CF | blue | na |
| chrUn | 20158761 | 20159693 | 933 SAT1_CF  | blue | na |
| chrUn | 20159735 | 20160319 | 585 SAT1_CF  | blue | na |
| chrUn | 20160331 | 20161927 | 1597 SAT1_CF | blue | na |
| chrUn | 20161950 | 20165513 | 3564 SAT1_CF | blue | na |
| chrUn | 20165553 | 20166050 | 498 SAT1_CF  | blue | na |
| chrUn | 20166062 | 20166178 | 117 SAT1_CF  | blue | na |
| chrUn | 20166192 | 20166717 | 526 SAT1_CF  | blue | na |
| chrUn | 20166774 | 20167320 | 547 SAT1_CF  | blue | na |
| chrUn | 20167333 | 20167978 | 646 SAT1_CF  | blue | na |
| chrUn | 20168022 | 20169191 | 1170 SAT1_CF | blue | na |
| chrUn | 20169206 | 20169727 | 522 SAT1_CF  | blue | na |
| chrUn | 20169754 | 20170346 | 593 SAT1_CF  | blue | na |

|       |          |          |              |      |    |
|-------|----------|----------|--------------|------|----|
| chrUn | 20170358 | 20170467 | 110 SAT1_CF  | blue | na |
| chrUn | 20170487 | 20171032 | 546 SAT1_CF  | blue | na |
| chrUn | 20171075 | 20172451 | 1377 SAT1_CF | blue | na |
| chrUn | 20172462 | 20173266 | 805 SAT1_CF  | blue | na |
| chrUn | 20173289 | 20173835 | 547 SAT1_CF  | blue | na |
| chrUn | 20173882 | 20175456 | 1575 SAT1_CF | blue | na |
| chrUn | 20175474 | 20176145 | 672 SAT1_CF  | blue | na |
| chrUn | 20176188 | 20177928 | 1741 SAT1_CF | blue | na |
| chrUn | 20177940 | 20179537 | 1598 SAT1_CF | blue | na |
| chrUn | 20179549 | 20180227 | 679 SAT1_CF  | blue | na |
| chrUn | 20180270 | 20181225 | 956 SAT1_CF  | blue | na |
| chrUn | 20181341 | 20182301 | 961 SAT1_CF  | blue | na |
| chrUn | 20182322 | 20182843 | 522 SAT1_CF  | blue | na |
| chrUn | 20182856 | 20182962 | 107 SAT1_CF  | blue | na |
| chrUn | 20182987 | 20185061 | 2075 SAT1_CF | blue | na |
| chrUn | 20185131 | 20186331 | 1201 SAT1_CF | blue | na |
| chrUn | 20186375 | 20187576 | 1202 SAT1_CF | blue | na |
| chrUn | 20187591 | 20187726 | 136 SAT1_CF  | blue | na |
| chrUn | 20187773 | 20188294 | 522 SAT1_CF  | blue | na |
| chrUn | 20188306 | 20188412 | 107 SAT1_CF  | blue | na |
| chrUn | 20188436 | 20189064 | 629 SAT1_CF  | blue | na |
| chrUn | 20189092 | 20189912 | 821 SAT1_CF  | blue | na |
| chrUn | 20189930 | 20190615 | 686 SAT1_CF  | blue | na |
| chrUn | 20190627 | 20191302 | 676 SAT1_CF  | blue | na |
| chrUn | 20191315 | 20192213 | 899 SAT1_CF  | blue | na |
| chrUn | 20192231 | 20193165 | 935 SAT1_CF  | blue | na |
| chrUn | 20193207 | 20193702 | 496 SAT1_CF  | blue | na |
| chrUn | 20193772 | 20194404 | 633 SAT1_CF  | blue | na |
| chrUn | 20194417 | 20195030 | 614 SAT1_CF  | blue | na |
| chrUn | 20195042 | 20196725 | 1684 SAT1_CF | blue | na |
| chrUn | 20196804 | 20197517 | 714 SAT1_CF  | blue | na |
| chrUn | 20197564 | 20198083 | 520 SAT1_CF  | blue | na |
| chrUn | 20198095 | 20198772 | 678 SAT1_CF  | blue | na |
| chrUn | 20198815 | 20200471 | 1657 SAT1_CF | blue | na |
| chrUn | 20200484 | 20200803 | 320 SAT1_CF  | blue | na |
| chrUn | 20200878 | 20201357 | 480 SAT1_CF  | blue | na |
| chrUn | 20201384 | 20202170 | 787 SAT1_CF  | blue | na |
| chrUn | 20202193 | 20202739 | 547 SAT1_CF  | blue | na |
| chrUn | 20202781 | 20203037 | 257 SAT1_CF  | blue | na |
| chrUn | 20203145 | 20203766 | 622 SAT1_CF  | blue | na |
| chrUn | 20203792 | 20205545 | 1754 SAT1_CF | blue | na |
| chrUn | 20205558 | 20205664 | 107 SAT1_CF  | blue | na |

|       |          |          |              |      |    |
|-------|----------|----------|--------------|------|----|
| chrUn | 20205689 | 20207944 | 2256 SAT1_CF | blue | na |
| chrUn | 20208026 | 20208533 | 508 SAT1_CF  | blue | na |
| chrUn | 20208546 | 20209227 | 682 SAT1_CF  | blue | na |
| chrUn | 20209239 | 20209921 | 683 SAT1_CF  | blue | na |
| chrUn | 20209932 | 20210422 | 491 SAT1_CF  | blue | na |
| chrUn | 20210436 | 20211656 | 1221 SAT1_CF | blue | na |
| chrUn | 20211683 | 20212068 | 386 SAT1_CF  | blue | na |
| chrUn | 20212083 | 20212681 | 599 SAT1_CF  | blue | na |
| chrUn | 20214093 | 20214698 | 606 SAT1_CF  | blue | na |
| chrUn | 20214890 | 20215214 | 325 SAT1_CF  | blue | na |
| chrUn | 20215227 | 20215828 | 602 SAT1_CF  | blue | na |
| chrUn | 20215859 | 20216147 | 289 SAT1_CF  | blue | na |
| chrUn | 20216167 | 20216276 | 110 SAT1_CF  | blue | na |
| chrUn | 20216288 | 20216896 | 609 SAT1_CF  | blue | na |
| chrUn | 20216908 | 20217409 | 502 SAT1_CF  | blue | na |
| chrUn | 20217454 | 20218281 | 828 SAT1_CF  | blue | na |
| chrUn | 20218307 | 20219271 | 965 SAT1_CF  | blue | na |
| chrUn | 20219314 | 20220553 | 1240 SAT1_CF | blue | na |
| chrUn | 20220577 | 20220667 | 91 SAT1_CF   | blue | na |
| chrUn | 20220694 | 20221273 | 580 SAT1_CF  | blue | na |
| chrUn | 20221357 | 20222085 | 729 SAT1_CF  | blue | na |
| chrUn | 20222112 | 20222761 | 650 SAT1_CF  | blue | na |
| chrUn | 20222796 | 20223479 | 684 SAT1_CF  | blue | na |
| chrUn | 20223492 | 20223993 | 502 SAT1_CF  | blue | na |
| chrUn | 20224006 | 20224494 | 489 SAT1_CF  | blue | na |
| chrUn | 20224523 | 20225151 | 629 SAT1_CF  | blue | na |
| chrUn | 20225194 | 20225740 | 547 SAT1_CF  | blue | na |
| chrUn | 20225760 | 20225869 | 110 SAT1_CF  | blue | na |
| chrUn | 20225881 | 20226423 | 543 SAT1_CF  | blue | na |
| chrUn | 20226466 | 20227408 | 943 SAT1_CF  | blue | na |
| chrUn | 20227431 | 20228790 | 1360 SAT1_CF | blue | na |
| chrUn | 20228803 | 20228974 | 172 SAT1_CF  | blue | na |
| chrUn | 20229016 | 20229798 | 783 SAT1_CF  | blue | na |
| chrUn | 20229876 | 20230865 | 990 SAT1_CF  | blue | na |
| chrUn | 20230913 | 20231410 | 498 SAT1_CF  | blue | na |
| chrUn | 20231428 | 20232093 | 666 SAT1_CF  | blue | na |
| chrUn | 20232119 | 20232579 | 461 SAT1_CF  | blue | na |
| chrUn | 20232656 | 20233161 | 506 SAT1_CF  | blue | na |
| chrUn | 20233182 | 20234381 | 1200 SAT1_CF | blue | na |
| chrUn | 20234393 | 20235074 | 682 SAT1_CF  | blue | na |
| chrUn | 20235086 | 20235762 | 677 SAT1_CF  | blue | na |
| chrUn | 20235805 | 20236912 | 1108 SAT1_CF | blue | na |

|       |          |          |              |      |    |
|-------|----------|----------|--------------|------|----|
| chrUn | 20236955 | 20237531 | 577 SAT1_CF  | blue | na |
| chrUn | 20237543 | 20238696 | 1154 SAT1_CF | blue | na |
| chrUn | 20238728 | 20238861 | 134 SAT1_CF  | blue | na |
| chrUn | 20238919 | 20239421 | 503 SAT1_CF  | blue | na |
| chrUn | 20239462 | 20240929 | 1468 SAT1_CF | blue | na |
| chrUn | 20240972 | 20242081 | 1110 SAT1_CF | blue | na |
| chrUn | 20242124 | 20243072 | 949 SAT1_CF  | blue | na |
| chrUn | 20243155 | 20243674 | 520 SAT1_CF  | blue | na |
| chrUn | 20243731 | 20244899 | 1169 SAT1_CF | blue | na |
| chrUn | 20244996 | 20245726 | 731 SAT1_CF  | blue | na |
| chrUn | 20245806 | 20248051 | 2246 SAT1_CF | blue | na |
| chrUn | 20248095 | 20248637 | 543 SAT1_CF  | blue | na |
| chrUn | 20248650 | 20249333 | 684 SAT1_CF  | blue | na |
| chrUn | 20249345 | 20250021 | 677 SAT1_CF  | blue | na |
| chrUn | 20250064 | 20251030 | 967 SAT1_CF  | blue | na |
| chrUn | 20251109 | 20251655 | 547 SAT1_CF  | blue | na |
| chrUn | 20251698 | 20252071 | 374 SAT1_CF  | blue | na |
| chrUn | 20252088 | 20253215 | 1128 SAT1_CF | blue | na |
| chrUn | 20253242 | 20253998 | 757 SAT1_CF  | blue | na |
| chrUn | 20254010 | 20254119 | 110 SAT1_CF  | blue | na |
| chrUn | 20254140 | 20255877 | 1738 SAT1_CF | blue | na |
| chrUn | 20255891 | 20256573 | 683 SAT1_CF  | blue | na |
| chrUn | 20256585 | 20257420 | 836 SAT1_CF  | blue | na |
| chrUn | 20257600 | 20257785 | 186 SAT1_CF  | blue | na |
| chrUn | 20257821 | 20258323 | 503 SAT1_CF  | blue | na |
| chrUn | 20258336 | 20259019 | 684 SAT1_CF  | blue | na |
| chrUn | 20259043 | 20260781 | 1739 SAT1_CF | blue | na |
| chrUn | 20260860 | 20261024 | 165 SAT1_CF  | blue | na |
| chrUn | 20261205 | 20261390 | 186 SAT1_CF  | blue | na |
| chrUn | 20261426 | 20261925 | 500 SAT1_CF  | blue | na |
| chrUn | 20261938 | 20262551 | 614 SAT1_CF  | blue | na |
| chrUn | 20262563 | 20263237 | 675 SAT1_CF  | blue | na |
| chrUn | 20263280 | 20264392 | 1113 SAT1_CF | blue | na |
| chrUn | 20264435 | 20265020 | 586 SAT1_CF  | blue | na |
| chrUn | 20265032 | 20265745 | 714 SAT1_CF  | blue | na |
| chrUn | 20265769 | 20265932 | 164 SAT1_CF  | blue | na |
| chrUn | 20265973 | 20266514 | 542 SAT1_CF  | blue | na |
| chrUn | 20266526 | 20266635 | 110 SAT1_CF  | blue | na |
| chrUn | 20266654 | 20267856 | 1203 SAT1_CF | blue | na |
| chrUn | 20267900 | 20268181 | 282 SAT1_CF  | blue | na |
| chrUn | 20268250 | 20268795 | 546 SAT1_CF  | blue | na |
| chrUn | 20268807 | 20269260 | 454 SAT1_CF  | blue | na |

|       |          |          |              |      |    |
|-------|----------|----------|--------------|------|----|
| chrUn | 20269336 | 20270386 | 1051 SAT1_CF | blue | na |
| chrUn | 20270397 | 20270920 | 524 SAT1_CF  | blue | na |
| chrUn | 20270940 | 20271550 | 611 SAT1_CF  | blue | na |
| chrUn | 20271593 | 20271966 | 374 SAT1_CF  | blue | na |
| chrUn | 20271983 | 20272504 | 522 SAT1_CF  | blue | na |
| chrUn | 20272522 | 20272616 | 95 SAT1_CF   | blue | na |
| chrUn | 20272646 | 20273201 | 556 SAT1_CF  | blue | na |
| chrUn | 20273213 | 20273877 | 665 SAT1_CF  | blue | na |
| chrUn | 20273924 | 20274041 | 118 SAT1_CF  | blue | na |
| chrUn | 20274083 | 20275696 | 1614 SAT1_CF | blue | na |
| chrUn | 20275762 | 20276263 | 502 SAT1_CF  | blue | na |
| chrUn | 20276275 | 20276383 | 109 SAT1_CF  | blue | na |
| chrUn | 20276406 | 20276713 | 308 SAT1_CF  | blue | na |
| chrUn | 20301126 | 20302110 | 985 SAT1_CF  | blue | na |
| chrUn | 20302122 | 20303530 | 1409 SAT1_CF | blue | na |
| chrUn | 20303552 | 20304217 | 666 SAT1_CF  | blue | na |
| chrUn | 20304261 | 20305810 | 1550 SAT1_CF | blue | na |
| chrUn | 20305824 | 20305931 | 108 SAT1_CF  | blue | na |
| chrUn | 20305953 | 20307257 | 1305 SAT1_CF | blue | na |
| chrUn | 20307287 | 20308149 | 863 SAT1_CF  | blue | na |
| chrUn | 20308182 | 20309120 | 939 SAT1_CF  | blue | na |
| chrUn | 20309157 | 20309656 | 500 SAT1_CF  | blue | na |
| chrUn | 20309669 | 20311358 | 1690 SAT1_CF | blue | na |
| chrUn | 20311370 | 20314913 | 3544 SAT1_CF | blue | na |
| chrUn | 20314926 | 20316544 | 1619 SAT1_CF | blue | na |
| chrUn | 20316586 | 20317367 | 782 SAT1_CF  | blue | na |
| chrUn | 20317399 | 20318395 | 997 SAT1_CF  | blue | na |
| chrUn | 20318484 | 20318984 | 501 SAT1_CF  | blue | na |
| chrUn | 20318996 | 20319599 | 604 SAT1_CF  | blue | na |
| chrUn | 20319611 | 20321068 | 1458 SAT1_CF | blue | na |
| chrUn | 20321100 | 20322096 | 997 SAT1_CF  | blue | na |
| chrUn | 20322116 | 20322218 | 103 SAT1_CF  | blue | na |
| chrUn | 20322243 | 20323431 | 1189 SAT1_CF | blue | na |
| chrUn | 20323502 | 20324063 | 562 SAT1_CF  | blue | na |
| chrUn | 20324075 | 20325554 | 1480 SAT1_CF | blue | na |
| chrUn | 20325596 | 20326783 | 1188 SAT1_CF | blue | na |
| chrUn | 20326901 | 20327419 | 519 SAT1_CF  | blue | na |
| chrUn | 20327476 | 20328022 | 547 SAT1_CF  | blue | na |
| chrUn | 20328065 | 20329885 | 1821 SAT1_CF | blue | na |
| chrUn | 20329925 | 20330427 | 503 SAT1_CF  | blue | na |
| chrUn | 20330444 | 20331201 | 758 SAT1_CF  | blue | na |
| chrUn | 20331214 | 20331827 | 614 SAT1_CF  | blue | na |

|       |          |          |              |      |    |
|-------|----------|----------|--------------|------|----|
| chrUn | 20331839 | 20332697 | 859 SAT1_CF  | blue | na |
| chrUn | 20332774 | 20333540 | 767 SAT1_CF  | blue | na |
| chrUn | 20333565 | 20334107 | 543 SAT1_CF  | blue | na |
| chrUn | 20334129 | 20334802 | 674 SAT1_CF  | blue | na |
| chrUn | 20334814 | 20335489 | 676 SAT1_CF  | blue | na |
| chrUn | 20335532 | 20336497 | 966 SAT1_CF  | blue | na |
| chrUn | 20336576 | 20337122 | 547 SAT1_CF  | blue | na |
| chrUn | 20337165 | 20337706 | 542 SAT1_CF  | blue | na |
| chrUn | 20338488 | 20339152 | 665 SAT1_CF  | blue | na |
| chrUn | 20339164 | 20339825 | 662 SAT1_CF  | blue | na |
| chrUn | 20339873 | 20340361 | 489 SAT1_CF  | blue | na |
| chrUn | 20340592 | 20341050 | 459 SAT1_CF  | blue | na |
| chrUn | 20341092 | 20341881 | 790 SAT1_CF  | blue | na |
| chrUn | 20341925 | 20342771 | 847 SAT1_CF  | blue | na |
| chrUn | 20342924 | 20343453 | 530 SAT1_CF  | blue | na |
| chrUn | 20343495 | 20344195 | 701 SAT1_CF  | blue | na |
| chrUn | 20344209 | 20345785 | 1577 SAT1_CF | blue | na |
| chrUn | 20345798 | 20346900 | 1103 SAT1_CF | blue | na |
| chrUn | 20346968 | 20347949 | 982 SAT1_CF  | blue | na |
| chrUn | 20347997 | 20349612 | 1616 SAT1_CF | blue | na |
| chrUn | 20349642 | 20350149 | 508 SAT1_CF  | blue | na |
| chrUn | 20350164 | 20350977 | 814 SAT1_CF  | blue | na |
| chrUn | 20351029 | 20351730 | 702 SAT1_CF  | blue | na |
| chrUn | 20351742 | 20351848 | 107 SAT1_CF  | blue | na |
| chrUn | 20351871 | 20352497 | 627 SAT1_CF  | blue | na |
| chrUn | 20352533 | 20353379 | 847 SAT1_CF  | blue | na |
| chrUn | 20353397 | 20354083 | 687 SAT1_CF  | blue | na |
| chrUn | 20354095 | 20354204 | 110 SAT1_CF  | blue | na |
| chrUn | 20354225 | 20355162 | 938 SAT1_CF  | blue | na |
| chrUn | 20355305 | 20355773 | 469 SAT1_CF  | blue | na |
| chrUn | 20355817 | 20356510 | 694 SAT1_CF  | blue | na |
| chrUn | 20356553 | 20357146 | 594 SAT1_CF  | blue | na |
| chrUn | 20357355 | 20357687 | 333 SAT1_CF  | blue | na |
| chrUn | 20357700 | 20360369 | 2670 SAT1_CF | blue | na |
| chrUn | 20360456 | 20361653 | 1198 SAT1_CF | blue | na |
| chrUn | 20361665 | 20362552 | 888 SAT1_CF  | blue | na |
| chrUn | 20362565 | 20363247 | 683 SAT1_CF  | blue | na |
| chrUn | 20364278 | 20364538 | 261 SAT1_CF  | blue | na |
| chrUn | 20364557 | 20365081 | 525 SAT1_CF  | blue | na |
| chrUn | 20365138 | 20365684 | 547 SAT1_CF  | blue | na |
| chrUn | 20365727 | 20366256 | 530 SAT1_CF  | blue | na |
| chrUn | 20366274 | 20367766 | 1493 SAT1_CF | blue | na |



|       |          |          |              |      |    |
|-------|----------|----------|--------------|------|----|
| chrUn | 20367787 | 20368435 | 649 SAT1_CF  | blue | na |
| chrUn | 20368446 | 20368993 | 548 SAT1_CF  | blue | na |
| chrUn | 20369063 | 20371397 | 2335 SAT1_CF | blue | na |
| chrUn | 20371477 | 20372001 | 525 SAT1_CF  | blue | na |
| chrUn | 20372016 | 20372172 | 157 SAT1_CF  | blue | na |
| chrUn | 20372198 | 20372807 | 610 SAT1_CF  | blue | na |
| chrUn | 20372826 | 20373379 | 554 SAT1_CF  | blue | na |
| chrUn | 20373422 | 20374385 | 964 SAT1_CF  | blue | na |
| chrUn | 20374412 | 20376726 | 2315 SAT1_CF | blue | na |
| chrUn | 20376739 | 20377287 | 549 SAT1_CF  | blue | na |
| chrUn | 20377307 | 20378482 | 1176 SAT1_CF | blue | na |
| chrUn | 20378509 | 20380080 | 1572 SAT1_CF | blue | na |
| chrUn | 20380093 | 20380595 | 503 SAT1_CF  | blue | na |
| chrUn | 20380622 | 20380712 | 91 SAT1_CF   | blue | na |
| chrUn | 20380736 | 20382408 | 1673 SAT1_CF | blue | na |
| chrUn | 20382487 | 20383024 | 538 SAT1_CF  | blue | na |
| chrUn | 20383041 | 20383439 | 399 SAT1_CF  | blue | na |
| chrUn | 20383482 | 20384433 | 952 SAT1_CF  | blue | na |
| chrUn | 20384456 | 20384554 | 99 SAT1_CF   | blue | na |
| chrUn | 20384574 | 20385118 | 545 SAT1_CF  | blue | na |
| chrUn | 20385162 | 20386271 | 1110 SAT1_CF | blue | na |
| chrUn | 20386316 | 20387195 | 880 SAT1_CF  | blue | na |
| chrUn | 20387237 | 20387736 | 500 SAT1_CF  | blue | na |
| chrUn | 20387749 | 20388423 | 675 SAT1_CF  | blue | na |
| chrUn | 20388466 | 20389007 | 542 SAT1_CF  | blue | na |
| chrUn | 20389024 | 20390262 | 1239 SAT1_CF | blue | na |
| chrUn | 20390309 | 20390830 | 522 SAT1_CF  | blue | na |
| chrUn | 20390843 | 20391999 | 1157 SAT1_CF | blue | na |
| chrUn | 20392042 | 20392407 | 366 SAT1_CF  | blue | na |
| chrUn | 20393787 | 20394369 | 583 SAT1_CF  | blue | na |
| chrUn | 20394409 | 20395528 | 1120 SAT1_CF | blue | na |
| chrUn | 20395540 | 20396214 | 675 SAT1_CF  | blue | na |
| chrUn | 20396256 | 20397236 | 981 SAT1_CF  | blue | na |
| chrUn | 20397280 | 20397415 | 136 SAT1_CF  | blue | na |
| chrUn | 20397427 | 20397967 | 541 SAT1_CF  | blue | na |
| chrUn | 20397979 | 20398296 | 318 SAT1_CF  | blue | na |
| chrUn | 20398371 | 20398937 | 567 SAT1_CF  | blue | na |
| chrUn | 20398956 | 20399473 | 518 SAT1_CF  | blue | na |
| chrUn | 20399543 | 20400060 | 518 SAT1_CF  | blue | na |
| chrUn | 20400128 | 20400641 | 514 SAT1_CF  | blue | na |
| chrUn | 20400661 | 20401778 | 1118 SAT1_CF | blue | na |
| chrUn | 20401792 | 20403160 | 1369 SAT1_CF | blue | na |

|       |          |          |              |      |    |
|-------|----------|----------|--------------|------|----|
| chrUn | 20403206 | 20404163 | 958 SAT1_CF  | blue | na |
| chrUn | 20404242 | 20405201 | 960 SAT1_CF  | blue | na |
| chrUn | 20405222 | 20406732 | 1511 SAT1_CF | blue | na |
| chrUn | 20406775 | 20407338 | 564 SAT1_CF  | blue | na |
| chrUn | 20407418 | 20407730 | 313 SAT1_CF  | blue | na |
| chrUn | 20407749 | 20408291 | 543 SAT1_CF  | blue | na |
| chrUn | 20408362 | 20408992 | 631 SAT1_CF  | blue | na |
| chrUn | 20409004 | 20410163 | 1160 SAT1_CF | blue | na |
| chrUn | 20410183 | 20411444 | 1262 SAT1_CF | blue | na |
| chrUn | 20411464 | 20413045 | 1582 SAT1_CF | blue | na |
| chrUn | 20413100 | 20414037 | 938 SAT1_CF  | blue | na |
| chrUn | 20414105 | 20414624 | 520 SAT1_CF  | blue | na |
| chrUn | 20414637 | 20415242 | 606 SAT1_CF  | blue | na |
| chrUn | 20415254 | 20415358 | 105 SAT1_CF  | blue | na |
| chrUn | 20415384 | 20416013 | 630 SAT1_CF  | blue | na |
| chrUn | 20416027 | 20417358 | 1332 SAT1_CF | blue | na |
| chrUn | 20417402 | 20418781 | 1380 SAT1_CF | blue | na |
| chrUn | 20418841 | 20419321 | 481 SAT1_CF  | blue | na |
| chrUn | 20419334 | 20419442 | 109 SAT1_CF  | blue | na |
| chrUn | 20419463 | 20420782 | 1320 SAT1_CF | blue | na |
| chrUn | 20420825 | 20422852 | 2028 SAT1_CF | blue | na |
| chrUn | 20422902 | 20423402 | 501 SAT1_CF  | blue | na |
| chrUn | 20423415 | 20423523 | 109 SAT1_CF  | blue | na |
| chrUn | 20423543 | 20424381 | 839 SAT1_CF  | blue | na |
| chrUn | 20424401 | 20425190 | 790 SAT1_CF  | blue | na |
| chrUn | 20425233 | 20425954 | 722 SAT1_CF  | blue | na |
| chrUn | 20426136 | 20426319 | 184 SAT1_CF  | blue | na |
| chrUn | 20426355 | 20426854 | 500 SAT1_CF  | blue | na |
| chrUn | 20426867 | 20426973 | 107 SAT1_CF  | blue | na |
| chrUn | 20426996 | 20428028 | 1033 SAT1_CF | blue | na |
| chrUn | 20428068 | 20428566 | 499 SAT1_CF  | blue | na |
| chrUn | 20428578 | 20430265 | 1688 SAT1_CF | blue | na |
| chrUn | 20430317 | 20430474 | 158 SAT1_CF  | blue | na |
| chrUn | 20430519 | 20431105 | 587 SAT1_CF  | blue | na |
| chrUn | 20431160 | 20431712 | 553 SAT1_CF  | blue | na |
| chrUn | 20431724 | 20434418 | 2695 SAT1_CF | blue | na |
| chrUn | 20434497 | 20435006 | 510 SAT1_CF  | blue | na |
| chrUn | 20435019 | 20435374 | 356 SAT1_CF  | blue | na |
| chrUn | 20435461 | 20435962 | 502 SAT1_CF  | blue | na |
| chrUn | 20435975 | 20436646 | 672 SAT1_CF  | blue | na |
| chrUn | 20436742 | 20437284 | 543 SAT1_CF  | blue | na |
| chrUn | 20437327 | 20438660 | 1334 SAT1_CF | blue | na |

|       |          |          |              |      |    |
|-------|----------|----------|--------------|------|----|
| chrUn | 20438804 | 20439297 | 494 SAT1_CF  | blue | na |
| chrUn | 20439328 | 20439521 | 194 SAT1_CF  | blue | na |
| chrUn | 20439549 | 20441335 | 1787 SAT1_CF | blue | na |
| chrUn | 20441388 | 20441890 | 503 SAT1_CF  | blue | na |
| chrUn | 20441901 | 20442662 | 762 SAT1_CF  | blue | na |
| chrUn | 20442674 | 20443348 | 675 SAT1_CF  | blue | na |
| chrUn | 20443391 | 20443926 | 536 SAT1_CF  | blue | na |
| chrUn | 20443940 | 20445014 | 1075 SAT1_CF | blue | na |
| chrUn | 20445055 | 20446010 | 956 SAT1_CF  | blue | na |
| chrUn | 20446067 | 20448040 | 1974 SAT1_CF | blue | na |
| chrUn | 20448081 | 20448475 | 395 SAT1_CF  | blue | na |
| chrUn | 20448515 | 20449016 | 502 SAT1_CF  | blue | na |
| chrUn | 20449033 | 20450014 | 982 SAT1_CF  | blue | na |
| chrUn | 20450028 | 20450551 | 524 SAT1_CF  | blue | na |
| chrUn | 20450593 | 20451668 | 1076 SAT1_CF | blue | na |
| chrUn | 20451711 | 20452258 | 548 SAT1_CF  | blue | na |
| chrUn | 20452286 | 20452422 | 137 SAT1_CF  | blue | na |
| chrUn | 20452487 | 20452988 | 502 SAT1_CF  | blue | na |
| chrUn | 20453011 | 20453605 | 595 SAT1_CF  | blue | na |
| chrUn | 20453617 | 20454290 | 674 SAT1_CF  | blue | na |
| chrUn | 20454338 | 20455224 | 887 SAT1_CF  | blue | na |
| chrUn | 20455258 | 20455637 | 380 SAT1_CF  | blue | na |
| chrUn | 20455677 | 20456178 | 502 SAT1_CF  | blue | na |
| chrUn | 20456196 | 20457696 | 1501 SAT1_CF | blue | na |
| chrUn | 20457812 | 20458688 | 877 SAT1_CF  | blue | na |
| chrUn | 20458756 | 20459276 | 521 SAT1_CF  | blue | na |
| chrUn | 20459288 | 20459892 | 605 SAT1_CF  | blue | na |
| chrUn | 20459904 | 20460662 | 759 SAT1_CF  | blue | na |
| chrUn | 20460676 | 20461353 | 678 SAT1_CF  | blue | na |
| chrUn | 20461396 | 20462343 | 948 SAT1_CF  | blue | na |
| chrUn | 20462355 | 20463420 | 1066 SAT1_CF | blue | na |
| chrUn | 20463441 | 20464081 | 641 SAT1_CF  | blue | na |
| chrUn | 20464103 | 20465421 | 1319 SAT1_CF | blue | na |
| chrUn | 20465464 | 20466434 | 971 SAT1_CF  | blue | na |
| chrUn | 20466632 | 20467309 | 678 SAT1_CF  | blue | na |
| chrUn | 20467352 | 20467718 | 367 SAT1_CF  | blue | na |
| chrUn | 20467778 | 20468260 | 483 SAT1_CF  | blue | na |
| chrUn | 20468273 | 20469022 | 750 SAT1_CF  | blue | na |
| chrUn | 20469064 | 20469845 | 782 SAT1_CF  | blue | na |
| chrUn | 20469912 | 20470795 | 884 SAT1_CF  | blue | na |
| chrUn | 20470848 | 20472820 | 1973 SAT1_CF | blue | na |
| chrUn | 20472862 | 20473406 | 545 SAT1_CF  | blue | na |

|       |          |          |      |         |      |    |
|-------|----------|----------|------|---------|------|----|
| chrUn | 20473450 | 20473978 | 529  | SAT1_CF | blue | na |
| chrUn | 20474035 | 20474509 | 475  | SAT1_CF | blue | na |
| chrUn | 20474536 | 20475679 | 1144 | SAT1_CF | blue | na |
| chrUn | 20475707 | 20475864 | 158  | SAT1_CF | blue | na |
| chrUn | 20475890 | 20476859 | 970  | SAT1_CF | blue | na |
| chrUn | 20476871 | 20477545 | 675  | SAT1_CF | blue | na |
| chrUn | 20477592 | 20478544 | 953  | SAT1_CF | blue | na |
| chrUn | 20478623 | 20479585 | 963  | SAT1_CF | blue | na |
| chrUn | 20479623 | 20480994 | 1372 | SAT1_CF | blue | na |
| chrUn | 20481007 | 20481856 | 850  | SAT1_CF | blue | na |
| chrUn | 20481906 | 20483568 | 1663 | SAT1_CF | blue | na |
| chrUn | 20483580 | 20484251 | 672  | SAT1_CF | blue | na |
| chrUn | 20484323 | 20484866 | 544  | SAT1_CF | blue | na |
| chrUn | 20484936 | 20485411 | 476  | SAT1_CF | blue | na |
| chrUn | 20485423 | 20486089 | 667  | SAT1_CF | blue | na |
| chrUn | 20486132 | 20486850 | 719  | SAT1_CF | blue | na |
| chrUn | 20486889 | 20487452 | 564  | SAT1_CF | blue | na |
| chrUn | 20487465 | 20488137 | 673  | SAT1_CF | blue | na |
| chrUn | 20488180 | 20489804 | 1625 | SAT1_CF | blue | na |
| chrUn | 20489836 | 20490211 | 376  | SAT1_CF | blue | na |
| chrUn | 20490236 | 20490756 | 521  | SAT1_CF | blue | na |
| chrUn | 20490798 | 20491110 | 313  | SAT1_CF | blue | na |
| chrUn | 20491152 | 20491797 | 646  | SAT1_CF | blue | na |
| chrUn | 20491851 | 20492441 | 591  | SAT1_CF | blue | na |
| chrUn | 20496332 | 20498301 | 1970 | SAT1_CF | blue | na |
| chrUn | 20498316 | 20498452 | 137  | SAT1_CF | blue | na |
| chrUn | 20498499 | 20499020 | 522  | SAT1_CF | blue | na |
| chrUn | 20499042 | 20501424 | 2383 | SAT1_CF | blue | na |
| chrUn | 20501435 | 20501927 | 493  | SAT1_CF | blue | na |
| chrUn | 20501941 | 20503310 | 1370 | SAT1_CF | blue | na |
| chrUn | 20503375 | 20503937 | 563  | SAT1_CF | blue | na |
| chrUn | 20503980 | 20504534 | 555  | SAT1_CF | blue | na |
| chrUn | 20504545 | 20505845 | 1301 | SAT1_CF | blue | na |
| chrUn | 20505888 | 20506421 | 534  | SAT1_CF | blue | na |
| chrUn | 20506435 | 20506850 | 416  | SAT1_CF | blue | na |
| chrUn | 20506929 | 20507888 | 960  | SAT1_CF | blue | na |
| chrUn | 20507928 | 20508430 | 503  | SAT1_CF | blue | na |
| chrUn | 20508443 | 20509900 | 1458 | SAT1_CF | blue | na |
| chrUn | 20509943 | 20510482 | 540  | SAT1_CF | blue | na |
| chrUn | 20510532 | 20511076 | 545  | SAT1_CF | blue | na |
| chrUn | 20511114 | 20511971 | 858  | SAT1_CF | blue | na |
| chrUn | 20512009 | 20512340 | 332  | SAT1_CF | blue | na |

|       |          |          |              |      |    |
|-------|----------|----------|--------------|------|----|
| chrUn | 20512427 | 20513041 | 615 SAT1_CF  | blue | na |
| chrUn | 20513070 | 20513614 | 545 SAT1_CF  | blue | na |
| chrUn | 20513658 | 20514201 | 544 SAT1_CF  | blue | na |
| chrUn | 20514219 | 20514904 | 686 SAT1_CF  | blue | na |
| chrUn | 20514926 | 20515763 | 838 SAT1_CF  | blue | na |
| chrUn | 20515776 | 20516886 | 1111 SAT1_CF | blue | na |
| chrUn | 20516967 | 20517491 | 525 SAT1_CF  | blue | na |
| chrUn | 20517506 | 20518257 | 752 SAT1_CF  | blue | na |
| chrUn | 20518313 | 20518860 | 548 SAT1_CF  | blue | na |
| chrUn | 20518902 | 20520676 | 1775 SAT1_CF | blue | na |
| chrUn | 20520763 | 20521264 | 502 SAT1_CF  | blue | na |
| chrUn | 20521282 | 20522121 | 840 SAT1_CF  | blue | na |
| chrUn | 20522144 | 20522662 | 519 SAT1_CF  | blue | na |
| chrUn | 20522674 | 20523532 | 859 SAT1_CF  | blue | na |
| chrUn | 20523575 | 20524365 | 791 SAT1_CF  | blue | na |
| chrUn | 20524409 | 20524949 | 541 SAT1_CF  | blue | na |
| chrUn | 20524961 | 20525633 | 673 SAT1_CF  | blue | na |
| chrUn | 20525680 | 20526312 | 633 SAT1_CF  | blue | na |
| chrUn | 20526340 | 20526904 | 565 SAT1_CF  | blue | na |
| chrUn | 20526984 | 20527508 | 525 SAT1_CF  | blue | na |
| chrUn | 20527523 | 20527680 | 158 SAT1_CF  | blue | na |
| chrUn | 20527725 | 20528227 | 503 SAT1_CF  | blue | na |
| chrUn | 20528238 | 20528999 | 762 SAT1_CF  | blue | na |
| chrUn | 20529013 | 20529814 | 802 SAT1_CF  | blue | na |
| chrUn | 20529827 | 20530344 | 518 SAT1_CF  | blue | na |
| chrUn | 20530369 | 20530727 | 359 SAT1_CF  | blue | na |
| chrUn | 20530771 | 20531319 | 549 SAT1_CF  | blue | na |
| chrUn | 20531332 | 20531993 | 662 SAT1_CF  | blue | na |
| chrUn | 20532036 | 20533656 | 1621 SAT1_CF | blue | na |
| chrUn | 20533672 | 20534070 | 399 SAT1_CF  | blue | na |
| chrUn | 20534091 | 20534611 | 521 SAT1_CF  | blue | na |
| chrUn | 20534623 | 20535953 | 1331 SAT1_CF | blue | na |
| chrUn | 20535997 | 20537238 | 1242 SAT1_CF | blue | na |
| chrUn | 20537949 | 20538769 | 821 SAT1_CF  | blue | na |
| chrUn | 20538792 | 20539037 | 246 SAT1_CF  | blue | na |
| chrUn | 20539056 | 20539577 | 522 SAT1_CF  | blue | na |
| chrUn | 20539595 | 20541686 | 2092 SAT1_CF | blue | na |
| chrUn | 20541729 | 20542359 | 631 SAT1_CF  | blue | na |
| chrUn | 20542389 | 20542947 | 559 SAT1_CF  | blue | na |
| chrUn | 20543036 | 20543527 | 492 SAT1_CF  | blue | na |
| chrUn | 20543549 | 20544230 | 682 SAT1_CF  | blue | na |
| chrUn | 20544242 | 20546411 | 2170 SAT1_CF | blue | na |

|       |          |          |      |         |      |    |
|-------|----------|----------|------|---------|------|----|
| chrUn | 20546451 | 20547648 | 1198 | SAT1_CF | blue | na |
| chrUn | 20547660 | 20548383 | 724  | SAT1_CF | blue | na |
| chrUn | 20548394 | 20548886 | 493  | SAT1_CF | blue | na |
| chrUn | 20548900 | 20550531 | 1632 | SAT1_CF | blue | na |
| chrUn | 20550545 | 20551109 | 565  | SAT1_CF | blue | na |
| chrUn | 20624420 | 20624562 | 143  | SAT1_CF | blue | na |
| chrUn | 20624622 | 20625122 | 501  | SAT1_CF | blue | na |
| chrUn | 20625140 | 20630036 | 4897 | SAT1_CF | blue | na |
| chrUn | 20630048 | 20630651 | 604  | SAT1_CF | blue | na |
| chrUn | 20630678 | 20631266 | 589  | SAT1_CF | blue | na |
| chrUn | 20631293 | 20631964 | 672  | SAT1_CF | blue | na |
| chrUn | 20632009 | 20633443 | 1435 | SAT1_CF | blue | na |
| chrUn | 20633496 | 20633997 | 502  | SAT1_CF | blue | na |
| chrUn | 20634009 | 20634122 | 114  | SAT1_CF | blue | na |
| chrUn | 20634138 | 20634684 | 547  | SAT1_CF | blue | na |
| chrUn | 20634727 | 20635261 | 535  | SAT1_CF | blue | na |
| chrUn | 20635281 | 20636765 | 1485 | SAT1_CF | blue | na |
| chrUn | 20636786 | 20637306 | 521  | SAT1_CF | blue | na |
| chrUn | 20637319 | 20638000 | 682  | SAT1_CF | blue | na |
| chrUn | 20638013 | 20638675 | 663  | SAT1_CF | blue | na |
| chrUn | 20638718 | 20639348 | 631  | SAT1_CF | blue | na |
| chrUn | 20639413 | 20639972 | 560  | SAT1_CF | blue | na |
| chrUn | 20640078 | 20640560 | 483  | SAT1_CF | blue | na |
| chrUn | 20640587 | 20641251 | 665  | SAT1_CF | blue | na |
| chrUn | 20641273 | 20641946 | 674  | SAT1_CF | blue | na |
| chrUn | 20641958 | 20642842 | 885  | SAT1_CF | blue | na |
| chrUn | 20642864 | 20643714 | 851  | SAT1_CF | blue | na |
| chrUn | 20643727 | 20644411 | 685  | SAT1_CF | blue | na |
| chrUn | 20644516 | 20645061 | 546  | SAT1_CF | blue | na |
| chrUn | 20645104 | 20646064 | 961  | SAT1_CF | blue | na |
| chrUn | 20646131 | 20646652 | 522  | SAT1_CF | blue | na |
| chrUn | 20646665 | 20647069 | 405  | SAT1_CF | blue | na |
| chrUn | 20647139 | 20648189 | 1051 | SAT1_CF | blue | na |
| chrUn | 20648211 | 20648310 | 100  | SAT1_CF | blue | na |
| chrUn | 20648331 | 20649061 | 731  | SAT1_CF | blue | na |
| chrUn | 20649113 | 20649638 | 526  | SAT1_CF | blue | na |
| chrUn | 20649676 | 20650948 | 1273 | SAT1_CF | blue | na |
| chrUn | 20650988 | 20652177 | 1190 | SAT1_CF | blue | na |
| chrUn | 20652220 | 20652852 | 633  | SAT1_CF | blue | na |
| chrUn | 20652880 | 20653439 | 560  | SAT1_CF | blue | na |
| chrUn | 20653519 | 20654068 | 550  | SAT1_CF | blue | na |
| chrUn | 20654096 | 20654255 | 160  | SAT1_CF | blue | na |

|       |          |          |              |      |    |
|-------|----------|----------|--------------|------|----|
| chrUn | 20654280 | 20654800 | 521 SAT1_CF  | blue | na |
| chrUn | 20654826 | 20655488 | 663 SAT1_CF  | blue | na |
| chrUn | 20655501 | 20655629 | 129 SAT1_CF  | blue | na |
| chrUn | 20655642 | 20656258 | 617 SAT1_CF  | blue | na |
| chrUn | 20656344 | 20656679 | 336 SAT1_CF  | blue | na |
| chrUn | 20656760 | 20657284 | 525 SAT1_CF  | blue | na |
| chrUn | 20657299 | 20658627 | 1329 SAT1_CF | blue | na |
| chrUn | 20658641 | 20659262 | 622 SAT1_CF  | blue | na |
| chrUn | 20659274 | 20659948 | 675 SAT1_CF  | blue | na |
| chrUn | 20659991 | 20660529 | 539 SAT1_CF  | blue | na |
| chrUn | 20660543 | 20661617 | 1075 SAT1_CF | blue | na |
| chrUn | 20661648 | 20662494 | 847 SAT1_CF  | blue | na |
| chrUn | 20662506 | 20663179 | 674 SAT1_CF  | blue | na |
| chrUn | 20663223 | 20664848 | 1626 SAT1_CF | blue | na |
| chrUn | 20664862 | 20665693 | 832 SAT1_CF  | blue | na |
| chrUn | 20665706 | 20665813 | 108 SAT1_CF  | blue | na |
| chrUn | 20665835 | 20666409 | 575 SAT1_CF  | blue | na |
| chrUn | 20666421 | 20667097 | 677 SAT1_CF  | blue | na |
| chrUn | 20667118 | 20668158 | 1041 SAT1_CF | blue | na |
| chrUn | 20668176 | 20668861 | 686 SAT1_CF  | blue | na |
| chrUn | 20668873 | 20671578 | 2706 SAT1_CF | blue | na |
| chrUn | 20671721 | 20672213 | 493 SAT1_CF  | blue | na |
| chrUn | 20672270 | 20674502 | 2233 SAT1_CF | blue | na |
| chrUn | 20674517 | 20674674 | 158 SAT1_CF  | blue | na |
| chrUn | 20674719 | 20675211 | 493 SAT1_CF  | blue | na |
| chrUn | 20675235 | 20675991 | 757 SAT1_CF  | blue | na |
| chrUn | 20676003 | 20677337 | 1335 SAT1_CF | blue | na |
| chrUn | 20677382 | 20677687 | 306 SAT1_CF  | blue | na |
| chrUn | 20677767 | 20678367 | 601 SAT1_CF  | blue | na |
| chrUn | 20678793 | 20678927 | 135 SAT1_CF  | blue | na |
| chrUn | 20678993 | 20680180 | 1188 SAT1_CF | blue | na |
| chrUn | 20680223 | 20680854 | 632 SAT1_CF  | blue | na |
| chrUn | 20680919 | 20681477 | 559 SAT1_CF  | blue | na |
| chrUn | 20681525 | 20682069 | 545 SAT1_CF  | blue | na |
| chrUn | 20682097 | 20682233 | 137 SAT1_CF  | blue | na |
| chrUn | 20682299 | 20682797 | 499 SAT1_CF  | blue | na |
| chrUn | 20682820 | 20683493 | 674 SAT1_CF  | blue | na |
| chrUn | 20683505 | 20684265 | 761 SAT1_CF  | blue | na |
| chrUn | 20684277 | 20684949 | 673 SAT1_CF  | blue | na |
| chrUn | 20685019 | 20685495 | 477 SAT1_CF  | blue | na |
| chrUn | 20685507 | 20686172 | 666 SAT1_CF  | blue | na |
| chrUn | 20686215 | 20686742 | 528 SAT1_CF  | blue | na |

|       |          |          |      |         |      |    |
|-------|----------|----------|------|---------|------|----|
| chrUn | 20686763 | 20687845 | 1083 | SAT1_CF | blue | na |
| chrUn | 20687888 | 20688230 | 343  | SAT1_CF | blue | na |
| chrUn | 20688314 | 20688796 | 483  | SAT1_CF | blue | na |
| chrUn | 20688809 | 20689557 | 749  | SAT1_CF | blue | na |
| chrUn | 20689599 | 20690222 | 624  | SAT1_CF | blue | na |
| chrUn | 20690252 | 20690782 | 531  | SAT1_CF | blue | na |
| chrUn | 20690796 | 20691293 | 498  | SAT1_CF | blue | na |
| chrUn | 20691380 | 20693937 | 2558 | SAT1_CF | blue | na |
| chrUn | 20693981 | 20694509 | 529  | SAT1_CF | blue | na |
| chrUn | 20694566 | 20695656 | 1091 | SAT1_CF | blue | na |
| chrUn | 20695671 | 20696358 | 688  | SAT1_CF | blue | na |
| chrUn | 20696402 | 20696946 | 545  | SAT1_CF | blue | na |
| chrUn | 20696973 | 20697477 | 505  | SAT1_CF | blue | na |
| chrUn | 20697521 | 20698481 | 961  | SAT1_CF | blue | na |
| chrUn | 20698541 | 20699471 | 931  | SAT1_CF | blue | na |
| chrUn | 20699483 | 20700814 | 1332 | SAT1_CF | blue | na |
| chrUn | 20700970 | 20701505 | 536  | SAT1_CF | blue | na |
| chrUn | 20701527 | 20702034 | 508  | SAT1_CF | blue | na |
| chrUn | 20702046 | 20702833 | 788  | SAT1_CF | blue | na |
| chrUn | 20702856 | 20703363 | 508  | SAT1_CF | blue | na |
| chrUn | 20703376 | 20704211 | 836  | SAT1_CF | blue | na |
| chrUn | 20704224 | 20704927 | 704  | SAT1_CF | blue | na |
| chrUn | 20704939 | 20707067 | 2129 | SAT1_CF | blue | na |
| chrUn | 20707111 | 20707453 | 343  | SAT1_CF | blue | na |
| chrUn | 20707482 | 20708378 | 897  | SAT1_CF | blue | na |
| chrUn | 20708418 | 20708919 | 502  | SAT1_CF | blue | na |
| chrUn | 20708932 | 20709040 | 109  | SAT1_CF | blue | na |
| chrUn | 20709061 | 20709616 | 556  | SAT1_CF | blue | na |
| chrUn | 20709628 | 20710224 | 597  | SAT1_CF | blue | na |
| chrUn | 20710244 | 20712352 | 2109 | SAT1_CF | blue | na |
| chrUn | 20712395 | 20713738 | 1344 | SAT1_CF | blue | na |
| chrUn | 20713778 | 20714279 | 502  | SAT1_CF | blue | na |
| chrUn | 20714293 | 20714416 | 124  | SAT1_CF | blue | na |
| chrUn | 20714431 | 20715054 | 624  | SAT1_CF | blue | na |
| chrUn | 20715066 | 20715902 | 837  | SAT1_CF | blue | na |
| chrUn | 20716079 | 20716264 | 186  | SAT1_CF | blue | na |
| chrUn | 20716300 | 20717495 | 1196 | SAT1_CF | blue | na |
| chrUn | 20717513 | 20718445 | 933  | SAT1_CF | blue | na |
| chrUn | 20718524 | 20719269 | 746  | SAT1_CF | blue | na |
| chrUn | 20719321 | 20719959 | 639  | SAT1_CF | blue | na |
| chrUn | 20719988 | 20720614 | 627  | SAT1_CF | blue | na |
| chrUn | 20720649 | 20721497 | 849  | SAT1_CF | blue | na |



|       |          |          |              |      |    |
|-------|----------|----------|--------------|------|----|
| chrUn | 20721510 | 20722193 | 684 SAT1_CF  | blue | na |
| chrUn | 20722205 | 20724710 | 2506 SAT1_CF | blue | na |
| chrUn | 20724725 | 20724882 | 158 SAT1_CF  | blue | na |
| chrUn | 20724927 | 20725196 | 270 SAT1_CF  | blue | na |
| chrUn | 20725384 | 20725636 | 253 SAT1_CF  | blue | na |
| chrUn | 20725649 | 20727019 | 1371 SAT1_CF | blue | na |
| chrUn | 20727062 | 20727402 | 341 SAT1_CF  | blue | na |
| chrUn | 20728824 | 20729341 | 518 SAT1_CF  | blue | na |
| chrUn | 20729428 | 20729922 | 495 SAT1_CF  | blue | na |
| chrUn | 20729942 | 20730547 | 606 SAT1_CF  | blue | na |
| chrUn | 20730559 | 20731234 | 676 SAT1_CF  | blue | na |
| chrUn | 20731276 | 20733331 | 2056 SAT1_CF | blue | na |
| chrUn | 20733391 | 20733961 | 571 SAT1_CF  | blue | na |
| chrUn | 20733980 | 20734532 | 553 SAT1_CF  | blue | na |
| chrUn | 20734567 | 20735133 | 567 SAT1_CF  | blue | na |
| chrUn | 20735171 | 20735665 | 495 SAT1_CF  | blue | na |
| chrUn | 20735690 | 20736367 | 678 SAT1_CF  | blue | na |
| chrUn | 20736379 | 20737269 | 891 SAT1_CF  | blue | na |
| chrUn | 20737283 | 20738651 | 1369 SAT1_CF | blue | na |
| chrUn | 20738697 | 20739654 | 958 SAT1_CF  | blue | na |
| chrUn | 20739733 | 20740281 | 549 SAT1_CF  | blue | na |
| chrUn | 20740294 | 20742249 | 1956 SAT1_CF | blue | na |
| chrUn | 20742293 | 20742840 | 548 SAT1_CF  | blue | na |
| chrUn | 20742882 | 20743084 | 203 SAT1_CF  | blue | na |
| chrUn | 20743265 | 20743445 | 181 SAT1_CF  | blue | na |
| chrUn | 20743506 | 20743978 | 473 SAT1_CF  | blue | na |
| chrUn | 20743991 | 20744099 | 109 SAT1_CF  | blue | na |
| chrUn | 20744120 | 20745104 | 985 SAT1_CF  | blue | na |
| chrUn | 20745191 | 20745692 | 502 SAT1_CF  | blue | na |
| chrUn | 20745710 | 20746650 | 941 SAT1_CF  | blue | na |
| chrUn | 20746671 | 20747189 | 519 SAT1_CF  | blue | na |
| chrUn | 20747200 | 20747602 | 403 SAT1_CF  | blue | na |
| chrUn | 20747642 | 20748732 | 1091 SAT1_CF | blue | na |
| chrUn | 20748750 | 20750074 | 1325 SAT1_CF | blue | na |
| chrUn | 20750117 | 20750423 | 307 SAT1_CF  | blue | na |
| chrUn | 20750501 | 20751008 | 508 SAT1_CF  | blue | na |
| chrUn | 20751022 | 20751672 | 651 SAT1_CF  | blue | na |
| chrUn | 20751684 | 20752368 | 685 SAT1_CF  | blue | na |
| chrUn | 20752381 | 20752983 | 603 SAT1_CF  | blue | na |
| chrUn | 20753010 | 20753683 | 674 SAT1_CF  | blue | na |
| chrUn | 20753727 | 20754767 | 1041 SAT1_CF | blue | na |
| chrUn | 20754846 | 20755760 | 915 SAT1_CF  | blue | na |

|       |          |          |              |        |    |
|-------|----------|----------|--------------|--------|----|
| chrUn | 20755847 | 20756348 | 502 SAT1_CF  | blue   | na |
| chrUn | 20756361 | 20758461 | 2101 SAT1_CF | blue   | na |
| chrUn | 20758504 | 20759015 | 512 SAT1_CF  | blue   | na |
| chrUn | 20759046 | 20759178 | 133 SAT1_CF  | blue   | na |
| chrUn | 20759225 | 20760786 | 1562 SAT1_CF | blue   | na |
| chrUn | 20760835 | 20761429 | 595 SAT1_CF  | blue   | na |
| chrUn | 20762825 | 20763398 | 574 SAT1_CF  | blue   | na |
| chrUn | 20763438 | 20763932 | 495 SAT1_CF  | blue   | na |
| chrUn | 20763952 | 20764631 | 680 SAT1_CF  | blue   | na |
| chrUn | 20764654 | 20765320 | 667 SAT1_CF  | blue   | na |
| chrUn | 20765363 | 20765900 | 538 SAT1_CF  | blue   | na |
| chrUn | 20765911 | 20766987 | 1077 SAT1_CF | blue   | na |
| chrUn | 20767070 | 20768505 | 1436 SAT1_CF | blue   | na |
| chrUn | 20768547 | 20768712 | 166 SAT1_CF  | blue   | na |
| chrUn | 20768894 | 20769079 | 186 SAT1_CF  | blue   | na |
| chrUn | 20769096 | 20769614 | 519 SAT1_CF  | blue   | na |
| chrUn | 20769627 | 20769733 | 107 SAT1_CF  | blue   | na |
| chrUn | 20769755 | 20770314 | 560 SAT1_CF  | blue   | na |
| chrUn | 20770326 | 20772073 | 1748 SAT1_CF | blue   | na |
| chrUn | 20772115 | 20773829 | 1715 SAT1_CF | blue   | na |
| chrUn | 20773906 | 20774522 | 617 SAT1_CF  | blue   | na |
| chrUn | 20774536 | 20775218 | 683 SAT1_CF  | blue   | na |
| chrUn | 20775230 | 20776562 | 1333 SAT1_CF | blue   | na |
| chrUn | 20776606 | 20777268 | 663 SAT1_CF  | blue   | na |
| chrUn | 20777286 | 20777798 | 513 SAT1_CF  | blue   | na |
| chrUn | 20777826 | 20778531 | 706 SAT1_CF  | blue   | na |
| chrUn | 20778544 | 20778655 | 112 SAT1_CF  | blue   | na |
| chrUn | 20778672 | 20779913 | 1242 SAT1_CF | blue   | na |
| chrUn | 20779956 | 20780437 | 482 SAT1_CF  | blue   | na |
| chrUn | 20798064 | 20799229 | 1166 SAT1_CF | blue   | na |
| chrUn | 20799241 | 20799925 | 685 SAT1_CF  | blue   | na |
| chrUn | 20799938 | 20800440 | 503 SAT1_CF  | blue   | na |
| chrUn | 20800527 | 20802049 | 1523 SAT1_CF | blue   | na |
| chrUn | 20802063 | 20802607 | 545 SAT1_CF  | blue   | na |
| chrUn | 20802651 | 20802696 | 46 SAT1_CF   | blue   | na |
| chrUn | 20802696 | 20803943 | 1248 CarSat1 | red    | na |
| chrUn | 20803964 | 20804436 | 473 CarSat1  | red    | na |
| chrUn | 20804609 | 20804678 | 70 CarSat1   | red    | na |
| chrUn | 20804695 | 20805003 | 309 CarSat1  | red    | na |
| chrUn | 20805152 | 20805832 | 681 CarSat1  | red    | na |
| chrUn | 20806848 | 20807258 | 411 CarSat1  | red    | na |
| chrUn | 20808892 | 20809093 | 202 Sat2CF   | purple | na |

|       |          |          |              |        |    |
|-------|----------|----------|--------------|--------|----|
| chrUn | 20808969 | 20810050 | 1082 Sat2CF  | purple | na |
| chrUn | 20808978 | 20809903 | 926 Sat2CF   | purple | na |
| chrUn | 20834178 | 20834327 | 150 Sat2CF   | purple | na |
| chrUn | 20834198 | 20835410 | 1213 Sat2CF  | purple | na |
| chrUn | 20884555 | 20884679 | 125 Sat2CF   | purple | na |
| chrUn | 20884571 | 20885369 | 799 Sat2CF   | purple | na |
| chrUn | 20904666 | 20905738 | 1073 Sat2CF  | purple | na |
| chrUn | 20929010 | 20930184 | 1175 Sat2CF  | purple | na |
| chrUn | 20958025 | 20959063 | 1039 Sat2CF  | purple | na |
| chrUn | 20958132 | 20959265 | 1134 Sat2CF  | purple | na |
| chrUn | 20981022 | 20982230 | 1209 Sat2CF  | purple | na |
| chrUn | 20996320 | 20997404 | 1085 Sat2CF  | purple | na |
| chrUn | 21129703 | 21130407 | 705 CarSat1  | red    | na |
| chrUn | 21130564 | 21132011 | 1448 CarSat1 | red    | na |
| chrUn | 21132032 | 21133547 | 1516 CarSat1 | red    | na |
| chrUn | 21133565 | 21135101 | 1537 CarSat1 | red    | na |
| chrUn | 21135122 | 21136713 | 1592 CarSat1 | red    | na |
| chrUn | 21136867 | 21137977 | 1111 CarSat1 | red    | na |
| chrUn | 21137980 | 21139057 | 1078 SAT1_CF | blue   | na |
| chrUn | 21139100 | 21139645 | 546 SAT1_CF  | blue   | na |
| chrUn | 21139676 | 21139719 | 44 SAT1_CF   | blue   | na |
| chrUn | 21139739 | 21139839 | 101 SAT1_CF  | blue   | na |
| chrUn | 21143394 | 21144401 | 1008 Sat2CF  | purple | na |
| chrUn | 21144629 | 21145233 | 605 SAT1_CF  | blue   | na |
| chrUn | 21145244 | 21145505 | 262 SAT1_CF  | blue   | na |
| chrUn | 21145498 | 21146230 | 733 CarSat1  | red    | na |
| chrUn | 21147930 | 21148595 | 666 SAT1_CF  | blue   | na |
| chrUn | 21148608 | 21148927 | 320 SAT1_CF  | blue   | na |
| chrUn | 21148980 | 21149481 | 502 SAT1_CF  | blue   | na |
| chrUn | 21149493 | 21150979 | 1487 SAT1_CF | blue   | na |
| chrUn | 21150990 | 21151392 | 403 SAT1_CF  | blue   | na |
| chrUn | 21151432 | 21152544 | 1113 SAT1_CF | blue   | na |
| chrUn | 21152587 | 21153731 | 1145 SAT1_CF | blue   | na |
| chrUn | 21153743 | 21154418 | 676 SAT1_CF  | blue   | na |
| chrUn | 21154460 | 21156168 | 1709 SAT1_CF | blue   | na |
| chrUn | 21156195 | 21156783 | 589 SAT1_CF  | blue   | na |
| chrUn | 21156810 | 21157483 | 674 SAT1_CF  | blue   | na |
| chrUn | 21157497 | 21158125 | 629 SAT1_CF  | blue   | na |
| chrUn | 21158137 | 21159880 | 1744 SAT1_CF | blue   | na |
| chrUn | 21159920 | 21160422 | 503 SAT1_CF  | blue   | na |
| chrUn | 21160434 | 21161111 | 678 SAT1_CF  | blue   | na |
| chrUn | 21161154 | 21162153 | 1000 SAT1_CF | blue   | na |

|       |          |          |              |      |    |
|-------|----------|----------|--------------|------|----|
| chrUn | 21162197 | 21163123 | 927 SAT1_CF  | blue | na |
| chrUn | 21163195 | 21163696 | 502 SAT1_CF  | blue | na |
| chrUn | 21163710 | 21164391 | 682 SAT1_CF  | blue | na |
| chrUn | 21164403 | 21165073 | 671 SAT1_CF  | blue | na |
| chrUn | 21165143 | 21165619 | 477 SAT1_CF  | blue | na |
| chrUn | 21165631 | 21165740 | 110 SAT1_CF  | blue | na |
| chrUn | 21165752 | 21166296 | 545 SAT1_CF  | blue | na |
| chrUn | 21166339 | 21166970 | 632 SAT1_CF  | blue | na |
| chrUn | 21166998 | 21167562 | 565 SAT1_CF  | blue | na |
| chrUn | 21167605 | 21168129 | 525 SAT1_CF  | blue | na |
| chrUn | 21168140 | 21168300 | 161 SAT1_CF  | blue | na |
| chrUn | 21168345 | 21168844 | 500 SAT1_CF  | blue | na |
| chrUn | 21168858 | 21169541 | 684 SAT1_CF  | blue | na |
| chrUn | 21169553 | 21170404 | 852 SAT1_CF  | blue | na |
| chrUn | 21170443 | 21171367 | 925 SAT1_CF  | blue | na |
| chrUn | 21171402 | 21171904 | 503 SAT1_CF  | blue | na |
| chrUn | 21171917 | 21172023 | 107 SAT1_CF  | blue | na |
| chrUn | 21172045 | 21172602 | 558 SAT1_CF  | blue | na |
| chrUn | 21172614 | 21173289 | 676 SAT1_CF  | blue | na |
| chrUn | 21173333 | 21173964 | 632 SAT1_CF  | blue | na |
| chrUn | 21173991 | 21175032 | 1042 SAT1_CF | blue | na |
| chrUn | 21175045 | 21175843 | 799 SAT1_CF  | blue | na |
| chrUn | 21175869 | 21176412 | 544 SAT1_CF  | blue | na |
| chrUn | 21176455 | 21178084 | 1630 SAT1_CF | blue | na |
| chrUn | 21178127 | 21178494 | 368 SAT1_CF  | blue | na |
| chrUn | 21178554 | 21179036 | 483 SAT1_CF  | blue | na |
| chrUn | 21179049 | 21179380 | 332 SAT1_CF  | blue | na |
| chrUn | 21179397 | 21179950 | 554 SAT1_CF  | blue | na |
| chrUn | 21179962 | 21181422 | 1461 SAT1_CF | blue | na |
| chrUn | 21181453 | 21181957 | 505 SAT1_CF  | blue | na |
| chrUn | 21181990 | 21182147 | 158 SAT1_CF  | blue | na |
| chrUn | 21182192 | 21182693 | 502 SAT1_CF  | blue | na |
| chrUn | 21182705 | 21183382 | 678 SAT1_CF  | blue | na |
| chrUn | 21183425 | 21185275 | 1851 SAT1_CF | blue | na |
| chrUn | 21185302 | 21185438 | 137 SAT1_CF  | blue | na |
| chrUn | 21185485 | 21186004 | 520 SAT1_CF  | blue | na |
| chrUn | 21186016 | 21187350 | 1335 SAT1_CF | blue | na |
| chrUn | 21187375 | 21188328 | 954 SAT1_CF  | blue | na |
| chrUn | 21188359 | 21189205 | 847 SAT1_CF  | blue | na |
| chrUn | 21189217 | 21189891 | 675 SAT1_CF  | blue | na |
| chrUn | 21189934 | 21190485 | 552 SAT1_CF  | blue | na |
| chrUn | 21190566 | 21191772 | 1207 SAT1_CF | blue | na |

|       |          |          |              |      |    |
|-------|----------|----------|--------------|------|----|
| chrUn | 21191787 | 21192492 | 706 SAT1_CF  | blue | na |
| chrUn | 21192505 | 21192612 | 108 SAT1_CF  | blue | na |
| chrUn | 21192634 | 21193876 | 1243 SAT1_CF | blue | na |
| chrUn | 21193920 | 21194548 | 629 SAT1_CF  | blue | na |
| chrUn | 21194576 | 21195138 | 563 SAT1_CF  | blue | na |
| chrUn | 21195181 | 21195703 | 523 SAT1_CF  | blue | na |
| chrUn | 21195718 | 21195875 | 158 SAT1_CF  | blue | na |
| chrUn | 21195920 | 21196188 | 269 SAT1_CF  | blue | na |
| chrUn | 21196376 | 21196627 | 252 SAT1_CF  | blue | na |
| chrUn | 21196640 | 21198009 | 1370 SAT1_CF | blue | na |
| chrUn | 21198051 | 21198437 | 387 SAT1_CF  | blue | na |
| chrUn | 21198452 | 21200008 | 1557 SAT1_CF | blue | na |
| chrUn | 21200020 | 21201396 | 1377 SAT1_CF | blue | na |
| chrUn | 21201409 | 21202650 | 1242 SAT1_CF | blue | na |
| chrUn | 21202665 | 21203284 | 620 SAT1_CF  | blue | na |
| chrUn | 21203308 | 21204359 | 1052 SAT1_CF | blue | na |
| chrUn | 21204399 | 21204901 | 503 SAT1_CF  | blue | na |
| chrUn | 21204928 | 21205018 | 91 SAT1_CF   | blue | na |
| chrUn | 21205042 | 21205634 | 593 SAT1_CF  | blue | na |
| chrUn | 21205678 | 21206714 | 1037 SAT1_CF | blue | na |
| chrUn | 21206793 | 21207748 | 956 SAT1_CF  | blue | na |
| chrUn | 21207772 | 21209445 | 1674 SAT1_CF | blue | na |
| chrUn | 21209456 | 21209564 | 109 SAT1_CF  | blue | na |
| chrUn | 21209616 | 21210136 | 521 SAT1_CF  | blue | na |
| chrUn | 21210154 | 21211132 | 979 SAT1_CF  | blue | na |
| chrUn | 21211496 | 21211690 | 195 SAT1_CF  | blue | na |
| chrUn | 21213116 | 21213721 | 606 SAT1_CF  | blue | na |
| chrUn | 21213733 | 21214408 | 676 SAT1_CF  | blue | na |
| chrUn | 21214450 | 21215431 | 982 SAT1_CF  | blue | na |
| chrUn | 21215475 | 21216162 | 688 SAT1_CF  | blue | na |
| chrUn | 21216174 | 21216485 | 312 SAT1_CF  | blue | na |
| chrUn | 21216566 | 21217135 | 570 SAT1_CF  | blue | na |
| chrUn | 21217154 | 21218300 | 1147 SAT1_CF | blue | na |
| chrUn | 21218365 | 21219506 | 1142 SAT1_CF | blue | na |
| chrUn | 21219541 | 21220107 | 567 SAT1_CF  | blue | na |
| chrUn | 21220145 | 21220639 | 495 SAT1_CF  | blue | na |
| chrUn | 21220669 | 21221339 | 671 SAT1_CF  | blue | na |
| chrUn | 21221351 | 21222241 | 891 SAT1_CF  | blue | na |
| chrUn | 21222255 | 21223302 | 1048 SAT1_CF | blue | na |
| chrUn | 21223857 | 21224039 | 183 SAT1_CF  | blue | na |
| chrUn | 21224066 | 21224623 | 558 SAT1_CF  | blue | na |
| chrUn | 21224739 | 21225287 | 549 SAT1_CF  | blue | na |

|       |          |          |              |      |    |
|-------|----------|----------|--------------|------|----|
| chrUn | 21225300 | 21227048 | 1749 SAT1_CF | blue | na |
| chrUn | 21227090 | 21227272 | 183 SAT1_CF  | blue | na |
| chrUn | 21227298 | 21228090 | 793 SAT1_CF  | blue | na |
| chrUn | 21228267 | 21228438 | 172 SAT1_CF  | blue | na |
| chrUn | 21228512 | 21228982 | 471 SAT1_CF  | blue | na |
| chrUn | 21229005 | 21229108 | 104 SAT1_CF  | blue | na |
| chrUn | 21229134 | 21230329 | 1196 SAT1_CF | blue | na |
| chrUn | 21230344 | 21230501 | 158 SAT1_CF  | blue | na |
| chrUn | 21230527 | 21232445 | 1919 SAT1_CF | blue | na |
| chrUn | 21232471 | 21233511 | 1041 SAT1_CF | blue | na |
| chrUn | 21233523 | 21233688 | 166 SAT1_CF  | blue | na |
| chrUn | 21233871 | 21234055 | 185 SAT1_CF  | blue | na |
| chrUn | 21234111 | 21234591 | 481 SAT1_CF  | blue | na |
| chrUn | 21234618 | 21235363 | 746 SAT1_CF  | blue | na |
| chrUn | 21235375 | 21236235 | 861 SAT1_CF  | blue | na |
| chrUn | 21236278 | 21237353 | 1076 SAT1_CF | blue | na |
| chrUn | 21237396 | 21237920 | 525 SAT1_CF  | blue | na |
| chrUn | 21237935 | 21238071 | 137 SAT1_CF  | blue | na |
| chrUn | 21238137 | 21239325 | 1189 SAT1_CF | blue | na |
| chrUn | 21239394 | 21240048 | 655 SAT1_CF  | blue | na |
| chrUn | 21240093 | 21240593 | 501 SAT1_CF  | blue | na |
| chrUn | 21240620 | 21241287 | 668 SAT1_CF  | blue | na |
| chrUn | 21241299 | 21241408 | 110 SAT1_CF  | blue | na |
| chrUn | 21241428 | 21241973 | 546 SAT1_CF  | blue | na |
| chrUn | 21242016 | 21242648 | 633 SAT1_CF  | blue | na |
| chrUn | 21242675 | 21243238 | 564 SAT1_CF  | blue | na |
| chrUn | 21243318 | 21243632 | 315 SAT1_CF  | blue | na |
| chrUn | 21243651 | 21244193 | 543 SAT1_CF  | blue | na |
| chrUn | 21244264 | 21244896 | 633 SAT1_CF  | blue | na |
| chrUn | 21244908 | 21246067 | 1160 SAT1_CF | blue | na |
| chrUn | 21246087 | 21246696 | 610 SAT1_CF  | blue | na |
| chrUn | 21246739 | 21246941 | 203 SAT1_CF  | blue | na |
| chrUn | 21247122 | 21247298 | 177 SAT1_CF  | blue | na |
| chrUn | 21247362 | 21249659 | 2298 SAT1_CF | blue | na |
| chrUn | 21249671 | 21249985 | 315 SAT1_CF  | blue | na |
| chrUn | 21250067 | 21250586 | 520 SAT1_CF  | blue | na |
| chrUn | 21250643 | 21251190 | 548 SAT1_CF  | blue | na |
| chrUn | 21251232 | 21251776 | 545 SAT1_CF  | blue | na |
| chrUn | 21251818 | 21251996 | 179 SAT1_CF  | blue | na |
| chrUn | 21252056 | 21252604 | 549 SAT1_CF  | blue | na |
| chrUn | 21252618 | 21252970 | 353 SAT1_CF  | blue | na |
| chrUn | 21253057 | 21253558 | 502 SAT1_CF  | blue | na |

|       |          |          |              |      |    |
|-------|----------|----------|--------------|------|----|
| chrUn | 21253572 | 21254329 | 758 SAT1_CF  | blue | na |
| chrUn | 21254341 | 21254450 | 110 SAT1_CF  | blue | na |
| chrUn | 21254471 | 21255015 | 545 SAT1_CF  | blue | na |
| chrUn | 21255076 | 21255766 | 691 SAT1_CF  | blue | na |
| chrUn | 21255780 | 21257385 | 1606 SAT1_CF | blue | na |
| chrUn | 21257398 | 21257505 | 108 SAT1_CF  | blue | na |
| chrUn | 21257527 | 21258157 | 631 SAT1_CF  | blue | na |
| chrUn | 21258171 | 21259031 | 861 SAT1_CF  | blue | na |
| chrUn | 21259072 | 21259616 | 545 SAT1_CF  | blue | na |
| chrUn | 21259665 | 21259946 | 282 SAT1_CF  | blue | na |
| chrUn | 21259973 | 21260770 | 798 SAT1_CF  | blue | na |
| chrUn | 21260952 | 21261086 | 135 SAT1_CF  | blue | na |
| chrUn | 21261154 | 21261673 | 520 SAT1_CF  | blue | na |
| chrUn | 21261686 | 21261791 | 106 SAT1_CF  | blue | na |
| chrUn | 21261814 | 21262907 | 1094 SAT1_CF | blue | na |
| chrUn | 21262929 | 21263798 | 870 SAT1_CF  | blue | na |
| chrUn | 21263810 | 21264495 | 686 SAT1_CF  | blue | na |
| chrUn | 21264508 | 21266220 | 1713 SAT1_CF | blue | na |
| chrUn | 21266254 | 21267155 | 902 SAT1_CF  | blue | na |
| chrUn | 21268568 | 21269138 | 571 SAT1_CF  | blue | na |
| chrUn | 21269162 | 21269682 | 521 SAT1_CF  | blue | na |
| chrUn | 21269695 | 21270376 | 682 SAT1_CF  | blue | na |
| chrUn | 21270388 | 21271149 | 762 SAT1_CF  | blue | na |
| chrUn | 21271161 | 21272490 | 1330 SAT1_CF | blue | na |
| chrUn | 21272503 | 21272904 | 402 SAT1_CF  | blue | na |
| chrUn | 21272944 | 21273446 | 503 SAT1_CF  | blue | na |
| chrUn | 21273458 | 21274427 | 970 SAT1_CF  | blue | na |
| chrUn | 21274442 | 21276000 | 1559 SAT1_CF | blue | na |
| chrUn | 21276048 | 21276828 | 781 SAT1_CF  | blue | na |
| chrUn | 21276883 | 21278047 | 1165 SAT1_CF | blue | na |
| chrUn | 21278094 | 21278596 | 503 SAT1_CF  | blue | na |
| chrUn | 21278609 | 21280162 | 1554 SAT1_CF | blue | na |
| chrUn | 21280204 | 21280748 | 545 SAT1_CF  | blue | na |
| chrUn | 21280764 | 21282365 | 1602 SAT1_CF | blue | na |
| chrUn | 21282383 | 21282490 | 108 SAT1_CF  | blue | na |
| chrUn | 21282507 | 21282941 | 435 SAT1_CF  | blue | na |
| chrUn | 21282955 | 21283062 | 108 SAT1_CF  | blue | na |
| chrUn | 21283084 | 21283364 | 281 SAT1_CF  | blue | na |
| chrUn | 21283547 | 21283826 | 280 SAT1_CF  | blue | na |
| chrUn | 21283839 | 21284954 | 1116 SAT1_CF | blue | na |
| chrUn | 21284972 | 21285682 | 711 SAT1_CF  | blue | na |
| chrUn | 21285728 | 21286221 | 494 SAT1_CF  | blue | na |

|       |          |          |              |      |    |
|-------|----------|----------|--------------|------|----|
| chrUn | 21286241 | 21286916 | 676 SAT1_CF  | blue | na |
| chrUn | 21286959 | 21288396 | 1438 SAT1_CF | blue | na |
| chrUn | 21288462 | 21289644 | 1183 SAT1_CF | blue | na |
| chrUn | 21289657 | 21290056 | 400 SAT1_CF  | blue | na |
| chrUn | 21290099 | 21290601 | 503 SAT1_CF  | blue | na |
| chrUn | 21290614 | 21292158 | 1545 SAT1_CF | blue | na |
| chrUn | 21292171 | 21292680 | 510 SAT1_CF  | blue | na |
| chrUn | 21292693 | 21293048 | 356 SAT1_CF  | blue | na |
| chrUn | 21293135 | 21293637 | 503 SAT1_CF  | blue | na |
| chrUn | 21293650 | 21294322 | 673 SAT1_CF  | blue | na |
| chrUn | 21294369 | 21294486 | 118 SAT1_CF  | blue | na |
| chrUn | 21294528 | 21296337 | 1810 SAT1_CF | blue | na |
| chrUn | 21296454 | 21296972 | 519 SAT1_CF  | blue | na |
| chrUn | 21297004 | 21297198 | 195 SAT1_CF  | blue | na |
| chrUn | 21297226 | 21298079 | 854 SAT1_CF  | blue | na |
| chrUn | 21298745 | 21298985 | 241 SAT1_CF  | blue | na |
| chrUn | 21299053 | 21299573 | 521 SAT1_CF  | blue | na |
| chrUn | 21299585 | 21300918 | 1334 SAT1_CF | blue | na |
| chrUn | 21300962 | 21302078 | 1117 SAT1_CF | blue | na |
| chrUn | 21302131 | 21303637 | 1507 SAT1_CF | blue | na |
| chrUn | 21303660 | 21303905 | 246 SAT1_CF  | blue | na |
| chrUn | 21303924 | 21304445 | 522 SAT1_CF  | blue | na |
| chrUn | 21304463 | 21305062 | 600 SAT1_CF  | blue | na |
| chrUn | 21305101 | 21306553 | 1453 SAT1_CF | blue | na |
| chrUn | 21306596 | 21307486 | 891 SAT1_CF  | blue | na |
| chrUn | 21307529 | 21308635 | 1107 SAT1_CF | blue | na |
| chrUn | 21308656 | 21309786 | 1131 SAT1_CF | blue | na |
| chrUn | 21309806 | 21311256 | 1451 SAT1_CF | blue | na |
| chrUn | 21311353 | 21311895 | 543 SAT1_CF  | blue | na |
| chrUn | 21311939 | 21312499 | 561 SAT1_CF  | blue | na |
| chrUn | 21312542 | 21313066 | 525 SAT1_CF  | blue | na |
| chrUn | 21313081 | 21313217 | 137 SAT1_CF  | blue | na |
| chrUn | 21313302 | 21313782 | 481 SAT1_CF  | blue | na |
| chrUn | 21313795 | 21314476 | 682 SAT1_CF  | blue | na |
| chrUn | 21314500 | 21315165 | 666 SAT1_CF  | blue | na |
| chrUn | 21315209 | 21315840 | 632 SAT1_CF  | blue | na |
| chrUn | 21315852 | 21316570 | 719 SAT1_CF  | blue | na |
| chrUn | 21316598 | 21316971 | 374 SAT1_CF  | blue | na |
| chrUn | 21316983 | 21317092 | 110 SAT1_CF  | blue | na |
| chrUn | 21317113 | 21317659 | 547 SAT1_CF  | blue | na |
| chrUn | 21317702 | 21318533 | 832 SAT1_CF  | blue | na |
| chrUn | 21318723 | 21319730 | 1008 SAT1_CF | blue | na |



|       |          |          |              |      |    |
|-------|----------|----------|--------------|------|----|
| chrUn | 21319754 | 21320489 | 736 SAT1_CF  | blue | na |
| chrUn | 21320502 | 21321262 | 761 SAT1_CF  | blue | na |
| chrUn | 21321280 | 21322929 | 1650 SAT1_CF | blue | na |
| chrUn | 21322941 | 21324307 | 1367 SAT1_CF | blue | na |
| chrUn | 21324372 | 21326074 | 1703 SAT1_CF | blue | na |
| chrUn | 21326097 | 21326763 | 667 SAT1_CF  | blue | na |
| chrUn | 21326806 | 21327332 | 527 SAT1_CF  | blue | na |
| chrUn | 21327354 | 21328436 | 1083 SAT1_CF | blue | na |
| chrUn | 21328516 | 21328841 | 326 SAT1_CF  | blue | na |
| chrUn | 21328887 | 21329388 | 502 SAT1_CF  | blue | na |
| chrUn | 21329401 | 21329991 | 591 SAT1_CF  | blue | na |
| chrUn | 21330019 | 21330581 | 563 SAT1_CF  | blue | na |
| chrUn | 21330593 | 21331856 | 1264 SAT1_CF | blue | na |
| chrUn | 21331892 | 21332724 | 833 SAT1_CF  | blue | na |
| chrUn | 21332736 | 21333585 | 850 SAT1_CF  | blue | na |
| chrUn | 21333674 | 21334860 | 1187 SAT1_CF | blue | na |
| chrUn | 21335130 | 21335651 | 522 SAT1_CF  | blue | na |
| chrUn | 21335678 | 21335746 | 69 SAT1_CF   | blue | na |
| chrUn | 21335758 | 21336310 | 553 SAT1_CF  | blue | na |
| chrUn | 21336353 | 21336843 | 491 SAT1_CF  | blue | na |
| chrUn | 21336909 | 21337429 | 521 SAT1_CF  | blue | na |
| chrUn | 21337443 | 21338093 | 651 SAT1_CF  | blue | na |
| chrUn | 21338115 | 21338866 | 752 SAT1_CF  | blue | na |
| chrUn | 21338879 | 21339482 | 604 SAT1_CF  | blue | na |
| chrUn | 21339707 | 21339862 | 156 SAT1_CF  | blue | na |
| chrUn | 21339927 | 21340525 | 599 SAT1_CF  | blue | na |
| chrUn | 21340548 | 21341055 | 508 SAT1_CF  | blue | na |
| chrUn | 21341069 | 21341613 | 545 SAT1_CF  | blue | na |
| chrUn | 21341634 | 21344212 | 2579 SAT1_CF | blue | na |
| chrUn | 21344256 | 21344706 | 451 SAT1_CF  | blue | na |
| chrUn | 21344763 | 21345237 | 475 SAT1_CF  | blue | na |
| chrUn | 21345264 | 21345854 | 591 SAT1_CF  | blue | na |
| chrUn | 21345868 | 21346021 | 154 SAT1_CF  | blue | na |
| chrUn | 21346082 | 21346607 | 526 SAT1_CF  | blue | na |
| chrUn | 21346622 | 21346779 | 158 SAT1_CF  | blue | na |
| chrUn | 21346844 | 21347774 | 931 SAT1_CF  | blue | na |
| chrUn | 21347792 | 21348461 | 670 SAT1_CF  | blue | na |
| chrUn | 21348509 | 21349466 | 958 SAT1_CF  | blue | na |
| chrUn | 21349545 | 21350507 | 963 SAT1_CF  | blue | na |
| chrUn | 21350545 | 21351914 | 1370 SAT1_CF | blue | na |
| chrUn | 21351927 | 21355135 | 3209 SAT1_CF | blue | na |
| chrUn | 21355205 | 21355678 | 474 SAT1_CF  | blue | na |

|       |          |          |              |      |    |
|-------|----------|----------|--------------|------|----|
| chrUn | 21355690 | 21356356 | 667 SAT1_CF  | blue | na |
| chrUn | 21356399 | 21357116 | 718 SAT1_CF  | blue | na |
| chrUn | 21357155 | 21357718 | 564 SAT1_CF  | blue | na |
| chrUn | 21357731 | 21358403 | 673 SAT1_CF  | blue | na |
| chrUn | 21358446 | 21360070 | 1625 SAT1_CF | blue | na |
| chrUn | 21360102 | 21360467 | 366 SAT1_CF  | blue | na |
| chrUn | 21360501 | 21361020 | 520 SAT1_CF  | blue | na |
| chrUn | 21361062 | 21361374 | 313 SAT1_CF  | blue | na |
| chrUn | 21361416 | 21362688 | 1273 SAT1_CF | blue | na |
| chrUn | 21364107 | 21364667 | 561 SAT1_CF  | blue | na |
| chrUn | 21364720 | 21365214 | 495 SAT1_CF  | blue | na |
| chrUn | 21365243 | 21366601 | 1359 SAT1_CF | blue | na |
| chrUn | 21366644 | 21367275 | 632 SAT1_CF  | blue | na |
| chrUn | 21367303 | 21367978 | 676 SAT1_CF  | blue | na |
| chrUn | 21368180 | 21368626 | 447 SAT1_CF  | blue | na |
| chrUn | 21368660 | 21369181 | 522 SAT1_CF  | blue | na |
| chrUn | 21369203 | 21370952 | 1750 SAT1_CF | blue | na |
| chrUn | 21370978 | 21371584 | 607 SAT1_CF  | blue | na |
| chrUn | 21371595 | 21372087 | 493 SAT1_CF  | blue | na |
| chrUn | 21372101 | 21373466 | 1366 SAT1_CF | blue | na |
| chrUn | 21373482 | 21373760 | 279 SAT1_CF  | blue | na |
| chrUn | 21373804 | 21374352 | 549 SAT1_CF  | blue | na |
| chrUn | 21374406 | 21375058 | 653 SAT1_CF  | blue | na |
| chrUn | 21375069 | 21375679 | 611 SAT1_CF  | blue | na |
| chrUn | 21375702 | 21376368 | 667 SAT1_CF  | blue | na |
| chrUn | 21376411 | 21377515 | 1105 SAT1_CF | blue | na |
| chrUn | 21377526 | 21378069 | 544 SAT1_CF  | blue | na |
| chrUn | 21378080 | 21378398 | 319 SAT1_CF  | blue | na |
| chrUn | 21378451 | 21378953 | 503 SAT1_CF  | blue | na |
| chrUn | 21378966 | 21379727 | 762 SAT1_CF  | blue | na |
| chrUn | 21379739 | 21381009 | 1271 SAT1_CF | blue | na |
| chrUn | 21381051 | 21381594 | 544 SAT1_CF  | blue | na |
| chrUn | 21381762 | 21382765 | 1004 SAT1_CF | blue | na |
| chrUn | 21382842 | 21383386 | 545 SAT1_CF  | blue | na |
| chrUn | 21383399 | 21383505 | 107 SAT1_CF  | blue | na |
| chrUn | 21383528 | 21383906 | 379 SAT1_CF  | blue | na |
| chrUn | 21383993 | 21384495 | 503 SAT1_CF  | blue | na |
| chrUn | 21384520 | 21385189 | 670 SAT1_CF  | blue | na |
| chrUn | 21385201 | 21385875 | 675 SAT1_CF  | blue | na |
| chrUn | 21385893 | 21386059 | 167 SAT1_CF  | blue | na |
| chrUn | 21386101 | 21387905 | 1805 SAT1_CF | blue | na |
| chrUn | 21387992 | 21388604 | 613 SAT1_CF  | blue | na |

|       |          |          |              |      |    |
|-------|----------|----------|--------------|------|----|
| chrUn | 21388635 | 21389179 | 545 SAT1_CF  | blue | na |
| chrUn | 21389223 | 21389766 | 544 SAT1_CF  | blue | na |
| chrUn | 21389784 | 21390463 | 680 SAT1_CF  | blue | na |
| chrUn | 21390495 | 21390776 | 282 SAT1_CF  | blue | na |
| chrUn | 21390956 | 21391231 | 276 SAT1_CF  | blue | na |
| chrUn | 21391274 | 21392000 | 727 SAT1_CF  | blue | na |
| chrUn | 21392045 | 21392580 | 536 SAT1_CF  | blue | na |
| chrUn | 21392602 | 21393120 | 519 SAT1_CF  | blue | na |
| chrUn | 21393132 | 21394490 | 1359 SAT1_CF | blue | na |
| chrUn | 21394502 | 21394805 | 304 SAT1_CF  | blue | na |
| chrUn | 21401141 | 21402524 | 1384 SAT1_CF | blue | na |
| chrUn | 21402545 | 21403228 | 684 SAT1_CF  | blue | na |
| chrUn | 21403240 | 21404211 | 972 SAT1_CF  | blue | na |
| chrUn | 21404255 | 21404810 | 556 SAT1_CF  | blue | na |
| chrUn | 21404861 | 21405371 | 511 SAT1_CF  | blue | na |
| chrUn | 21405399 | 21405556 | 158 SAT1_CF  | blue | na |
| chrUn | 21405601 | 21406102 | 502 SAT1_CF  | blue | na |
| chrUn | 21406115 | 21406219 | 105 SAT1_CF  | blue | na |
| chrUn | 21406243 | 21407669 | 1427 SAT1_CF | blue | na |
| chrUn | 21407746 | 21408253 | 508 SAT1_CF  | blue | na |
| chrUn | 21408288 | 21409153 | 866 SAT1_CF  | blue | na |
| chrUn | 21409166 | 21409555 | 390 SAT1_CF  | blue | na |
| chrUn | 21409608 | 21411665 | 2058 SAT1_CF | blue | na |
| chrUn | 21411689 | 21412746 | 1058 SAT1_CF | blue | na |
| chrUn | 21412760 | 21413972 | 1213 SAT1_CF | blue | na |
| chrUn | 21413983 | 21414471 | 489 SAT1_CF  | blue | na |
| chrUn | 21414539 | 21414868 | 330 SAT1_CF  | blue | na |
| chrUn | 21415090 | 21415175 | 86 SAT1_CF   | blue | na |
| chrUn | 21416593 | 21417209 | 617 SAT1_CF  | blue | na |
| chrUn | 21417232 | 21417778 | 547 SAT1_CF  | blue | na |
| chrUn | 21417825 | 21418180 | 356 SAT1_CF  | blue | na |
| chrUn | 21418289 | 21418769 | 481 SAT1_CF  | blue | na |
| chrUn | 21418787 | 21419429 | 643 SAT1_CF  | blue | na |
| chrUn | 21419441 | 21420117 | 677 SAT1_CF  | blue | na |
| chrUn | 21420160 | 21421492 | 1333 SAT1_CF | blue | na |
| chrUn | 21421532 | 21422519 | 988 SAT1_CF  | blue | na |
| chrUn | 21422563 | 21423483 | 921 SAT1_CF  | blue | na |
| chrUn | 21423523 | 21424060 | 538 SAT1_CF  | blue | na |
| chrUn | 21424087 | 21424679 | 593 SAT1_CF  | blue | na |
| chrUn | 21424691 | 21425366 | 676 SAT1_CF  | blue | na |
| chrUn | 21425409 | 21427442 | 2034 SAT1_CF | blue | na |
| chrUn | 21427488 | 21428649 | 1162 SAT1_CF | blue | na |

|       |          |          |              |      |    |
|-------|----------|----------|--------------|------|----|
| chrUn | 21428691 | 21430293 | 1603 SAT1_CF | blue | na |
| chrUn | 21430372 | 21431917 | 1546 SAT1_CF | blue | na |
| chrUn | 21431931 | 21432614 | 684 SAT1_CF  | blue | na |
| chrUn | 21432626 | 21432735 | 110 SAT1_CF  | blue | na |
| chrUn | 21432755 | 21434352 | 1598 SAT1_CF | blue | na |
| chrUn | 21434373 | 21435927 | 1555 SAT1_CF | blue | na |
| chrUn | 21435969 | 21436667 | 699 SAT1_CF  | blue | na |
| chrUn | 21436681 | 21437243 | 563 SAT1_CF  | blue | na |
| chrUn | 21438665 | 21439225 | 561 SAT1_CF  | blue | na |
| chrUn | 21439278 | 21441162 | 1885 SAT1_CF | blue | na |
| chrUn | 21441204 | 21442833 | 1630 SAT1_CF | blue | na |
| chrUn | 21442876 | 21443398 | 523 SAT1_CF  | blue | na |
| chrUn | 21443413 | 21443549 | 137 SAT1_CF  | blue | na |
| chrUn | 21443616 | 21444117 | 502 SAT1_CF  | blue | na |
| chrUn | 21444129 | 21444813 | 685 SAT1_CF  | blue | na |
| chrUn | 21444825 | 21446157 | 1333 SAT1_CF | blue | na |
| chrUn | 21446182 | 21446425 | 244 SAT1_CF  | blue | na |
| chrUn | 21446439 | 21446948 | 510 SAT1_CF  | blue | na |
| chrUn | 21446960 | 21447076 | 117 SAT1_CF  | blue | na |
| chrUn | 21447089 | 21447944 | 856 SAT1_CF  | blue | na |
| chrUn | 21447976 | 21448864 | 889 SAT1_CF  | blue | na |
| chrUn | 21448951 | 21449451 | 501 SAT1_CF  | blue | na |
| chrUn | 21449469 | 21450146 | 678 SAT1_CF  | blue | na |
| chrUn | 21450158 | 21450267 | 110 SAT1_CF  | blue | na |
| chrUn | 21450288 | 21450764 | 477 SAT1_CF  | blue | na |
| chrUn | 21450776 | 21450878 | 103 SAT1_CF  | blue | na |
| chrUn | 21450907 | 21451452 | 546 SAT1_CF  | blue | na |
| chrUn | 21451465 | 21453289 | 1825 SAT1_CF | blue | na |
| chrUn | 21453356 | 21453857 | 502 SAT1_CF  | blue | na |
| chrUn | 21453870 | 21454476 | 607 SAT1_CF  | blue | na |
| chrUn | 21454488 | 21455165 | 678 SAT1_CF  | blue | na |
| chrUn | 21455177 | 21455350 | 174 SAT1_CF  | blue | na |
| chrUn | 21455427 | 21458226 | 2800 SAT1_CF | blue | na |
| chrUn | 21458239 | 21458922 | 684 SAT1_CF  | blue | na |
| chrUn | 21458934 | 21460120 | 1187 SAT1_CF | blue | na |
| chrUn | 21460134 | 21462748 | 2615 SAT1_CF | blue | na |
| chrUn | 21462763 | 21462920 | 158 SAT1_CF  | blue | na |
| chrUn | 21462985 | 21464498 | 1514 SAT1_CF | blue | na |
| chrUn | 21464542 | 21465269 | 728 SAT1_CF  | blue | na |
| chrUn | 21465312 | 21465982 | 671 SAT1_CF  | blue | na |
| chrUn | 21465995 | 21466955 | 961 SAT1_CF  | blue | na |
| chrUn | 21466998 | 21468423 | 1426 SAT1_CF | blue | na |

|       |          |          |              |      |    |
|-------|----------|----------|--------------|------|----|
| chrUn | 21468491 | 21468730 | 240 SAT1_CF  | blue | na |
| chrUn | 21468760 | 21469268 | 509 SAT1_CF  | blue | na |
| chrUn | 21469296 | 21470654 | 1359 SAT1_CF | blue | na |
| chrUn | 21471658 | 21472080 | 423 SAT1_CF  | blue | na |
| chrUn | 21472147 | 21472208 | 62 SAT1_CF   | blue | na |
| chrUn | 21472221 | 21473156 | 936 SAT1_CF  | blue | na |
| chrUn | 21473196 | 21474416 | 1221 SAT1_CF | blue | na |
| chrUn | 21474448 | 21474969 | 522 SAT1_CF  | blue | na |
| chrUn | 21474984 | 21475141 | 158 SAT1_CF  | blue | na |
| chrUn | 21475167 | 21475688 | 522 SAT1_CF  | blue | na |
| chrUn | 21475701 | 21475807 | 107 SAT1_CF  | blue | na |
| chrUn | 21475830 | 21477906 | 2077 SAT1_CF | blue | na |
| chrUn | 21477976 | 21479223 | 1248 SAT1_CF | blue | na |
| chrUn | 21479234 | 21479727 | 494 SAT1_CF  | blue | na |
| chrUn | 21479740 | 21480342 | 603 SAT1_CF  | blue | na |
| chrUn | 21480354 | 21481029 | 676 SAT1_CF  | blue | na |
| chrUn | 21481072 | 21482574 | 1503 SAT1_CF | blue | na |
| chrUn | 21483974 | 21485024 | 1051 SAT1_CF | blue | na |
| chrUn | 21485039 | 21485566 | 528 SAT1_CF  | blue | na |
| chrUn | 21485586 | 21486889 | 1304 SAT1_CF | blue | na |
| chrUn | 21486922 | 21487271 | 350 SAT1_CF  | blue | na |
| chrUn | 21487327 | 21488523 | 1197 SAT1_CF | blue | na |
| chrUn | 21488535 | 21489216 | 682 SAT1_CF  | blue | na |
| chrUn | 21489227 | 21489719 | 493 SAT1_CF  | blue | na |
| chrUn | 21489733 | 21491365 | 1633 SAT1_CF | blue | na |
| chrUn | 21491380 | 21491941 | 562 SAT1_CF  | blue | na |
| chrUn | 21493358 | 21493958 | 601 SAT1_CF  | blue | na |
| chrUn | 21493971 | 21494734 | 764 SAT1_CF  | blue | na |
| chrUn | 21495185 | 21495372 | 188 SAT1_CF  | blue | na |
| chrUn | 21495392 | 21495501 | 110 SAT1_CF  | blue | na |
| chrUn | 21495513 | 21496121 | 609 SAT1_CF  | blue | na |
| chrUn | 21496133 | 21496633 | 501 SAT1_CF  | blue | na |
| chrUn | 21496678 | 21497504 | 827 SAT1_CF  | blue | na |
| chrUn | 21497530 | 21497946 | 417 SAT1_CF  | blue | na |
| chrUn | 21498269 | 21499689 | 1421 SAT1_CF | blue | na |
| chrUn | 21499713 | 21499803 | 91 SAT1_CF   | blue | na |
| chrUn | 21499830 | 21500409 | 580 SAT1_CF  | blue | na |
| chrUn | 21500489 | 21501241 | 753 SAT1_CF  | blue | na |
| chrUn | 21502145 | 21502805 | 661 SAT1_CF  | blue | na |
| chrUn | 21502818 | 21503319 | 502 SAT1_CF  | blue | na |
| chrUn | 21503332 | 21503820 | 489 SAT1_CF  | blue | na |
| chrUn | 21503864 | 21505066 | 1203 SAT1_CF | blue | na |

|       |          |          |              |      |    |
|-------|----------|----------|--------------|------|----|
| chrUn | 21505086 | 21505156 | 71 SAT1_CF   | blue | na |
| chrUn | 21505683 | 21505926 | 244 SAT1_CF  | blue | na |
| chrUn | 21505959 | 21506735 | 777 SAT1_CF  | blue | na |
| chrUn | 21506748 | 21508119 | 1372 SAT1_CF | blue | na |
| chrUn | 21508162 | 21509862 | 1701 SAT1_CF | blue | na |
| chrUn | 21509874 | 21510549 | 676 SAT1_CF  | blue | na |
| chrUn | 21510565 | 21511360 | 796 SAT1_CF  | blue | na |
| chrUn | 21511372 | 21513134 | 1763 SAT1_CF | blue | na |
| chrUn | 21513178 | 21513724 | 547 SAT1_CF  | blue | na |
| chrUn | 21513794 | 21515852 | 2059 SAT1_CF | blue | na |
| chrUn | 21515863 | 21516255 | 393 SAT1_CF  | blue | na |
| chrUn | 21516301 | 21516793 | 493 SAT1_CF  | blue | na |
| chrUn | 21516813 | 21516919 | 107 SAT1_CF  | blue | na |
| chrUn | 21516941 | 21517582 | 642 SAT1_CF  | blue | na |
| chrUn | 21517601 | 21519265 | 1665 SAT1_CF | blue | na |
| chrUn | 21519308 | 21519893 | 586 SAT1_CF  | blue | na |
| chrUn | 21519905 | 21521502 | 1598 SAT1_CF | blue | na |
| chrUn | 21521514 | 21522930 | 1417 SAT1_CF | blue | na |
| chrUn | 21522973 | 21523612 | 640 SAT1_CF  | blue | na |
| chrUn | 21523624 | 21524386 | 763 SAT1_CF  | blue | na |
| chrUn | 21524398 | 21526483 | 2086 SAT1_CF | blue | na |
| chrUn | 21526545 | 21527086 | 542 SAT1_CF  | blue | na |
| chrUn | 21527173 | 21527675 | 503 SAT1_CF  | blue | na |
| chrUn | 21527687 | 21527793 | 107 SAT1_CF  | blue | na |
| chrUn | 21527817 | 21528445 | 629 SAT1_CF  | blue | na |
| chrUn | 21528469 | 21528916 | 448 SAT1_CF  | blue | na |
| chrUn | 21528933 | 21529088 | 156 SAT1_CF  | blue | na |
| chrUn | 21529118 | 21529643 | 526 SAT1_CF  | blue | na |
| chrUn | 21529658 | 21529794 | 137 SAT1_CF  | blue | na |
| chrUn | 21529890 | 21530409 | 520 SAT1_CF  | blue | na |
| chrUn | 21530466 | 21531634 | 1169 SAT1_CF | blue | na |
| chrUn | 21531731 | 21532827 | 1097 SAT1_CF | blue | na |
| chrUn | 21532916 | 21533414 | 499 SAT1_CF  | blue | na |
| chrUn | 21533431 | 21534110 | 680 SAT1_CF  | blue | na |
| chrUn | 21534123 | 21534736 | 614 SAT1_CF  | blue | na |
| chrUn | 21534748 | 21535607 | 860 SAT1_CF  | blue | na |
| chrUn | 21535650 | 21537939 | 2290 SAT1_CF | blue | na |
| chrUn | 21537952 | 21538028 | 77 SAT1_CF   | blue | na |
| chrUn | 21538081 | 21538577 | 497 SAT1_CF  | blue | na |
| chrUn | 21538589 | 21539438 | 850 SAT1_CF  | blue | na |
| chrUn | 21539488 | 21540928 | 1441 SAT1_CF | blue | na |
| chrUn | 21540986 | 21541617 | 632 SAT1_CF  | blue | na |

|       |          |          |              |      |    |
|-------|----------|----------|--------------|------|----|
| chrUn | 21541629 | 21542002 | 374 SAT1_CF  | blue | na |
| chrUn | 21542187 | 21542872 | 686 SAT1_CF  | blue | na |
| chrUn | 21542886 | 21544642 | 1757 SAT1_CF | blue | na |
| chrUn | 21544653 | 21545221 | 569 SAT1_CF  | blue | na |
| chrUn | 21545234 | 21545917 | 684 SAT1_CF  | blue | na |
| chrUn | 21545997 | 21547239 | 1243 SAT1_CF | blue | na |
| chrUn | 21547257 | 21547934 | 678 SAT1_CF  | blue | na |
| chrUn | 21547946 | 21548624 | 679 SAT1_CF  | blue | na |
| chrUn | 21548666 | 21549517 | 852 SAT1_CF  | blue | na |
| chrUn | 21549587 | 21550132 | 546 SAT1_CF  | blue | na |
| chrUn | 21550175 | 21551057 | 883 SAT1_CF  | blue | na |
| chrUn | 21551071 | 21551616 | 546 SAT1_CF  | blue | na |
| chrUn | 21551658 | 21552212 | 555 SAT1_CF  | blue | na |
| chrUn | 21552250 | 21552750 | 501 SAT1_CF  | blue | na |
| chrUn | 21552763 | 21553446 | 684 SAT1_CF  | blue | na |
| chrUn | 21553458 | 21554442 | 985 SAT1_CF  | blue | na |
| chrUn | 21554469 | 21555479 | 1011 SAT1_CF | blue | na |
| chrUn | 21555497 | 21556434 | 938 SAT1_CF  | blue | na |
| chrUn | 21556472 | 21556975 | 504 SAT1_CF  | blue | na |
| chrUn | 21556993 | 21557677 | 685 SAT1_CF  | blue | na |
| chrUn | 21557689 | 21559124 | 1436 SAT1_CF | blue | na |
| chrUn | 21559136 | 21559854 | 719 SAT1_CF  | blue | na |
| chrUn | 21559875 | 21560763 | 889 SAT1_CF  | blue | na |
| chrUn | 21560850 | 21561967 | 1118 SAT1_CF | blue | na |
| chrUn | 21561981 | 21563535 | 1555 SAT1_CF | blue | na |
| chrUn | 21563556 | 21564917 | 1362 SAT1_CF | blue | na |
| chrUn | 21564960 | 21565923 | 964 SAT1_CF  | blue | na |
| chrUn | 21566003 | 21566929 | 927 SAT1_CF  | blue | na |
| chrUn | 21566965 | 21567465 | 501 SAT1_CF  | blue | na |
| chrUn | 21567483 | 21568530 | 1048 SAT1_CF | blue | na |
| chrUn | 21568551 | 21569093 | 543 SAT1_CF  | blue | na |
| chrUn | 21569163 | 21570364 | 1202 SAT1_CF | blue | na |
| chrUn | 21570408 | 21570748 | 341 SAT1_CF  | blue | na |
| chrUn | 21570793 | 21571646 | 854 SAT1_CF  | blue | na |
| chrUn | 21571676 | 21572634 | 959 SAT1_CF  | blue | na |
| chrUn | 21572684 | 21574175 | 1492 SAT1_CF | blue | na |
| chrUn | 21574204 | 21575372 | 1169 SAT1_CF | blue | na |
| chrUn | 21575396 | 21575649 | 254 SAT1_CF  | blue | na |
| chrUn | 21575714 | 21576195 | 482 SAT1_CF  | blue | na |
| chrUn | 21576208 | 21577432 | 1225 SAT1_CF | blue | na |
| chrUn | 21577444 | 21578087 | 644 SAT1_CF  | blue | na |
| chrUn | 21578131 | 21578950 | 820 SAT1_CF  | blue | na |

|       |          |          |              |      |    |
|-------|----------|----------|--------------|------|----|
| chrUn | 21579015 | 21579464 | 450 SAT1_CF  | blue | na |
| chrUn | 21579551 | 21580051 | 501 SAT1_CF  | blue | na |
| chrUn | 21580079 | 21581315 | 1237 SAT1_CF | blue | na |
| chrUn | 21581363 | 21581887 | 525 SAT1_CF  | blue | na |
| chrUn | 21581902 | 21582652 | 751 SAT1_CF  | blue | na |
| chrUn | 21582709 | 21583255 | 547 SAT1_CF  | blue | na |
| chrUn | 21583277 | 21583842 | 566 SAT1_CF  | blue | na |
| chrUn | 21583884 | 21585070 | 1187 SAT1_CF | blue | na |
| chrUn | 21585138 | 21585658 | 521 SAT1_CF  | blue | na |
| chrUn | 21585685 | 21586431 | 747 SAT1_CF  | blue | na |
| chrUn | 21586443 | 21587301 | 859 SAT1_CF  | blue | na |
| chrUn | 21587372 | 21588787 | 1416 SAT1_CF | blue | na |
| chrUn | 21588800 | 21589633 | 834 SAT1_CF  | blue | na |
| chrUn | 21589646 | 21590345 | 700 SAT1_CF  | blue | na |
| chrUn | 21590357 | 21591040 | 684 SAT1_CF  | blue | na |
| chrUn | 21591051 | 21591543 | 493 SAT1_CF  | blue | na |
| chrUn | 21591557 | 21592770 | 1214 SAT1_CF | blue | na |
| chrUn | 21592781 | 21593231 | 451 SAT1_CF  | blue | na |
| chrUn | 21596644 | 21597462 | 819 SAT1_CF  | blue | na |
| chrUn | 21597474 | 21597640 | 167 SAT1_CF  | blue | na |
| chrUn | 21597822 | 21598028 | 207 SAT1_CF  | blue | na |
| chrUn | 21598062 | 21598538 | 477 SAT1_CF  | blue | na |
| chrUn | 21598551 | 21600218 | 1668 SAT1_CF | blue | na |
| chrUn | 21600254 | 21601111 | 858 SAT1_CF  | blue | na |
| chrUn | 21601151 | 21601651 | 501 SAT1_CF  | blue | na |
| chrUn | 21601678 | 21602305 | 628 SAT1_CF  | blue | na |
| chrUn | 21602382 | 21602927 | 546 SAT1_CF  | blue | na |
| chrUn | 21602940 | 21603697 | 758 SAT1_CF  | blue | na |
| chrUn | 21603710 | 21603952 | 243 SAT1_CF  | blue | na |
| chrUn | 21604140 | 21605582 | 1443 SAT1_CF | blue | na |
| chrUn | 21605649 | 21606660 | 1012 SAT1_CF | blue | na |
| chrUn | 21606677 | 21607289 | 613 SAT1_CF  | blue | na |
| chrUn | 21607338 | 21607813 | 476 SAT1_CF  | blue | na |
| chrUn | 21607825 | 21607934 | 110 SAT1_CF  | blue | na |
| chrUn | 21607955 | 21608861 | 907 SAT1_CF  | blue | na |
| chrUn | 21608879 | 21609830 | 952 SAT1_CF  | blue | na |
| chrUn | 21609841 | 21611264 | 1424 SAT1_CF | blue | na |
| chrUn | 21611289 | 21612157 | 869 SAT1_CF  | blue | na |
| chrUn | 21612202 | 21612570 | 369 SAT1_CF  | blue | na |
| chrUn | 21612631 | 21613174 | 544 SAT1_CF  | blue | na |
| chrUn | 21613217 | 21614288 | 1072 SAT1_CF | blue | na |
| chrUn | 21614322 | 21615253 | 932 SAT1_CF  | blue | na |



|       |          |          |              |      |    |
|-------|----------|----------|--------------|------|----|
| chrUn | 21615293 | 21615789 | 497 SAT1_CF  | blue | na |
| chrUn | 21615806 | 21616470 | 665 SAT1_CF  | blue | na |
| chrUn | 21616527 | 21617071 | 545 SAT1_CF  | blue | na |
| chrUn | 21617114 | 21617658 | 545 SAT1_CF  | blue | na |
| chrUn | 21617680 | 21618351 | 672 SAT1_CF  | blue | na |
| chrUn | 21618365 | 21619926 | 1562 SAT1_CF | blue | na |
| chrUn | 21619944 | 21620706 | 763 SAT1_CF  | blue | na |
| chrUn | 21620718 | 21622740 | 2023 SAT1_CF | blue | na |
| chrUn | 21622771 | 21623296 | 526 SAT1_CF  | blue | na |
| chrUn | 21623311 | 21623467 | 157 SAT1_CF  | blue | na |
| chrUn | 21623493 | 21624722 | 1230 SAT1_CF | blue | na |
| chrUn | 21624754 | 21625237 | 484 SAT1_CF  | blue | na |
| chrUn | 21625291 | 21625446 | 156 SAT1_CF  | blue | na |
| chrUn | 21625472 | 21625992 | 521 SAT1_CF  | blue | na |
| chrUn | 21626004 | 21626087 | 84 SAT1_CF   | blue | na |
| chrUn | 21626135 | 21626688 | 554 SAT1_CF  | blue | na |
| chrUn | 21626700 | 21627556 | 857 SAT1_CF  | blue | na |
| chrUn | 21627598 | 21628141 | 544 SAT1_CF  | blue | na |
| chrUn | 21628157 | 21631005 | 2849 SAT1_CF | blue | na |
| chrUn | 21631084 | 21631633 | 550 SAT1_CF  | blue | na |
| chrUn | 21631713 | 21632029 | 317 SAT1_CF  | blue | na |
| chrUn | 21632085 | 21634270 | 2186 SAT1_CF | blue | na |
| chrUn | 21634338 | 21634966 | 629 SAT1_CF  | blue | na |
| chrUn | 21634977 | 21635296 | 320 SAT1_CF  | blue | na |
| chrUn | 21635349 | 21635851 | 503 SAT1_CF  | blue | na |
| chrUn | 21635869 | 21637234 | 1366 SAT1_CF | blue | na |
| chrUn | 21637277 | 21638235 | 959 SAT1_CF  | blue | na |
| chrUn | 21638302 | 21639458 | 1157 SAT1_CF | blue | na |
| chrUn | 21639470 | 21640150 | 681 SAT1_CF  | blue | na |
| chrUn | 21640161 | 21640653 | 493 SAT1_CF  | blue | na |
| chrUn | 21640665 | 21641992 | 1328 SAT1_CF | blue | na |
| chrUn | 21642043 | 21643008 | 966 SAT1_CF  | blue | na |
| chrUn | 21643037 | 21643556 | 520 SAT1_CF  | blue | na |
| chrUn | 21643569 | 21644251 | 683 SAT1_CF  | blue | na |
| chrUn | 21644274 | 21645450 | 1177 SAT1_CF | blue | na |
| chrUn | 21645463 | 21646147 | 685 SAT1_CF  | blue | na |
| chrUn | 21646159 | 21647584 | 1426 SAT1_CF | blue | na |
| chrUn | 21647663 | 21648209 | 547 SAT1_CF  | blue | na |
| chrUn | 21648287 | 21648835 | 549 SAT1_CF  | blue | na |
| chrUn | 21648847 | 21648949 | 103 SAT1_CF  | blue | na |
| chrUn | 21648978 | 21649522 | 545 SAT1_CF  | blue | na |
| chrUn | 21649537 | 21649709 | 173 SAT1_CF  | blue | na |

|       |          |          |              |      |    |
|-------|----------|----------|--------------|------|----|
| chrUn | 21649762 | 21651197 | 1436 SAT1_CF | blue | na |
| chrUn | 21651208 | 21651606 | 399 SAT1_CF  | blue | na |
| chrUn | 21651649 | 21652349 | 701 SAT1_CF  | blue | na |
| chrUn | 21653758 | 21654319 | 562 SAT1_CF  | blue | na |
| chrUn | 21654376 | 21655572 | 1197 SAT1_CF | blue | na |
| chrUn | 21655584 | 21656437 | 854 SAT1_CF  | blue | na |
| chrUn | 21656479 | 21657382 | 904 SAT1_CF  | blue | na |
| chrUn | 21657413 | 21659233 | 1821 SAT1_CF | blue | na |
| chrUn | 21659305 | 21659818 | 514 SAT1_CF  | blue | na |
| chrUn | 21659972 | 21660203 | 232 SAT1_CF  | blue | na |
| chrUn | 21660246 | 21660830 | 585 SAT1_CF  | blue | na |
| chrUn | 21660842 | 21661555 | 714 SAT1_CF  | blue | na |
| chrUn | 21661637 | 21662177 | 541 SAT1_CF  | blue | na |
| chrUn | 21662190 | 21662691 | 502 SAT1_CF  | blue | na |
| chrUn | 21662704 | 21663378 | 675 SAT1_CF  | blue | na |
| chrUn | 21663421 | 21664386 | 966 SAT1_CF  | blue | na |
| chrUn | 21664465 | 21665008 | 544 SAT1_CF  | blue | na |
| chrUn | 21665021 | 21665178 | 158 SAT1_CF  | blue | na |
| chrUn | 21665225 | 21665745 | 521 SAT1_CF  | blue | na |
| chrUn | 21665758 | 21666364 | 607 SAT1_CF  | blue | na |
| chrUn | 21666376 | 21667049 | 674 SAT1_CF  | blue | na |
| chrUn | 21667092 | 21667724 | 633 SAT1_CF  | blue | na |
| chrUn | 21667751 | 21668315 | 565 SAT1_CF  | blue | na |
| chrUn | 21668396 | 21668883 | 488 SAT1_CF  | blue | na |
| chrUn | 21668935 | 21669092 | 158 SAT1_CF  | blue | na |
| chrUn | 21669137 | 21669634 | 498 SAT1_CF  | blue | na |
| chrUn | 21669647 | 21670320 | 674 SAT1_CF  | blue | na |
| chrUn | 21670364 | 21670874 | 511 SAT1_CF  | blue | na |
| chrUn | 21670944 | 21671499 | 556 SAT1_CF  | blue | na |
| chrUn | 21671510 | 21672817 | 1308 SAT1_CF | blue | na |
| chrUn | 21672860 | 21673633 | 774 SAT1_CF  | blue | na |
| chrUn | 21673712 | 21674671 | 960 SAT1_CF  | blue | na |
| chrUn | 21674711 | 21675909 | 1199 SAT1_CF | blue | na |
| chrUn | 21675921 | 21676598 | 678 SAT1_CF  | blue | na |
| chrUn | 21676641 | 21677602 | 962 SAT1_CF  | blue | na |
| chrUn | 21677669 | 21678189 | 521 SAT1_CF  | blue | na |
| chrUn | 21678202 | 21678390 | 189 SAT1_CF  | blue | na |
| chrUn | 21678442 | 21679200 | 759 SAT1_CF  | blue | na |
| chrUn | 21679278 | 21679825 | 548 SAT1_CF  | blue | na |
| chrUn | 21679836 | 21680191 | 356 SAT1_CF  | blue | na |
| chrUn | 21680277 | 21680779 | 503 SAT1_CF  | blue | na |
| chrUn | 21680792 | 21681546 | 755 SAT1_CF  | blue | na |

|       |          |          |              |      |    |
|-------|----------|----------|--------------|------|----|
| chrUn | 21681616 | 21682162 | 547 SAT1_CF  | blue | na |
| chrUn | 21682229 | 21683028 | 800 SAT1_CF  | blue | na |
| chrUn | 21683052 | 21685250 | 2199 SAT1_CF | blue | na |
| chrUn | 21685278 | 21685659 | 382 SAT1_CF  | blue | na |
| chrUn | 21685681 | 21686201 | 521 SAT1_CF  | blue | na |
| chrUn | 21686213 | 21686322 | 110 SAT1_CF  | blue | na |
| chrUn | 21686343 | 21686975 | 633 SAT1_CF  | blue | na |
| chrUn | 21686987 | 21687654 | 668 SAT1_CF  | blue | na |
| chrUn | 21687711 | 21688256 | 546 SAT1_CF  | blue | na |
| chrUn | 21688299 | 21688842 | 544 SAT1_CF  | blue | na |
| chrUn | 21688864 | 21688960 | 97 SAT1_CF   | blue | na |
| chrUn | 21688979 | 21689533 | 555 SAT1_CF  | blue | na |
| chrUn | 21689545 | 21690220 | 676 SAT1_CF  | blue | na |
| chrUn | 21690270 | 21691230 | 961 SAT1_CF  | blue | na |
| chrUn | 21691345 | 21691831 | 487 SAT1_CF  | blue | na |
| chrUn | 21691883 | 21692442 | 560 SAT1_CF  | blue | na |
| chrUn | 21692454 | 21693682 | 1229 SAT1_CF | blue | na |
| chrUn | 21693725 | 21694266 | 542 SAT1_CF  | blue | na |
| chrUn | 21694308 | 21694590 | 283 SAT1_CF  | blue | na |
| chrUn | 21694608 | 21696154 | 1547 SAT1_CF | blue | na |
| chrUn | 21696166 | 21696849 | 684 SAT1_CF  | blue | na |
| chrUn | 21696861 | 21697543 | 683 SAT1_CF  | blue | na |
| chrUn | 21697556 | 21698395 | 840 SAT1_CF  | blue | na |
| chrUn | 21698408 | 21699596 | 1189 SAT1_CF | blue | na |
| chrUn | 21699608 | 21700767 | 1160 SAT1_CF | blue | na |
| chrUn | 21700787 | 21701396 | 610 SAT1_CF  | blue | na |
| chrUn | 21701476 | 21701640 | 165 SAT1_CF  | blue | na |
| chrUn | 21701822 | 21701981 | 160 SAT1_CF  | blue | na |
| chrUn | 21702042 | 21702621 | 580 SAT1_CF  | blue | na |
| chrUn | 21702683 | 21703984 | 1302 SAT1_CF | blue | na |
| chrUn | 21703996 | 21704858 | 863 SAT1_CF  | blue | na |
| chrUn | 21704900 | 21705531 | 632 SAT1_CF  | blue | na |
| chrUn | 21705559 | 21706562 | 1004 SAT1_CF | blue | na |
| chrUn | 21706596 | 21706945 | 350 SAT1_CF  | blue | na |
| chrUn | 21707001 | 21707501 | 501 SAT1_CF  | blue | na |
| chrUn | 21707515 | 21708198 | 684 SAT1_CF  | blue | na |
| chrUn | 21708210 | 21708893 | 684 SAT1_CF  | blue | na |
| chrUn | 21708904 | 21709396 | 493 SAT1_CF  | blue | na |
| chrUn | 21709410 | 21711035 | 1626 SAT1_CF | blue | na |
| chrUn | 21711049 | 21711590 | 542 SAT1_CF  | blue | na |
| chrUn | 21712988 | 21713561 | 574 SAT1_CF  | blue | na |
| chrUn | 21713625 | 21714218 | 594 SAT1_CF  | blue | na |

|       |          |          |              |      |    |
|-------|----------|----------|--------------|------|----|
| chrUn | 21714243 | 21714788 | 546 SAT1_CF  | blue | na |
| chrUn | 21714831 | 21716694 | 1864 SAT1_CF | blue | na |
| chrUn | 21716709 | 21717685 | 977 SAT1_CF  | blue | na |
| chrUn | 21717708 | 21719274 | 1567 SAT1_CF | blue | na |
| chrUn | 21719295 | 21720511 | 1217 SAT1_CF | blue | na |
| chrUn | 21720522 | 21720632 | 111 SAT1_CF  | blue | na |
| chrUn | 21720653 | 21721197 | 545 SAT1_CF  | blue | na |
| chrUn | 21721240 | 21723101 | 1862 SAT1_CF | blue | na |
| chrUn | 21723116 | 21723252 | 137 SAT1_CF  | blue | na |
| chrUn | 21723318 | 21723820 | 503 SAT1_CF  | blue | na |
| chrUn | 21723833 | 21723908 | 76 SAT1_CF   | blue | na |
| chrUn | 21723927 | 21724481 | 555 SAT1_CF  | blue | na |
| chrUn | 21724494 | 21725136 | 643 SAT1_CF  | blue | na |
| chrUn | 21725179 | 21727012 | 1834 SAT1_CF | blue | na |
| chrUn | 21727099 | 21727601 | 503 SAT1_CF  | blue | na |
| chrUn | 21727613 | 21727718 | 106 SAT1_CF  | blue | na |
| chrUn | 21727742 | 21728544 | 803 SAT1_CF  | blue | na |
| chrUn | 21728557 | 21728665 | 109 SAT1_CF  | blue | na |
| chrUn | 21728686 | 21729435 | 750 SAT1_CF  | blue | na |
| chrUn | 21729457 | 21730003 | 547 SAT1_CF  | blue | na |
| chrUn | 21730047 | 21731884 | 1838 SAT1_CF | blue | na |
| chrUn | 21732065 | 21732240 | 176 SAT1_CF  | blue | na |
| chrUn | 21732265 | 21733257 | 993 SAT1_CF  | blue | na |
| chrUn | 21733269 | 21734598 | 1330 SAT1_CF | blue | na |
| chrUn | 21734622 | 21735974 | 1353 SAT1_CF | blue | na |
| chrUn | 21736091 | 21736633 | 543 SAT1_CF  | blue | na |
| chrUn | 21736645 | 21736758 | 114 SAT1_CF  | blue | na |
| chrUn | 21736774 | 21737321 | 548 SAT1_CF  | blue | na |
| chrUn | 21737364 | 21739404 | 2041 SAT1_CF | blue | na |
| chrUn | 21739425 | 21739942 | 518 SAT1_CF  | blue | na |
| chrUn | 21739969 | 21740636 | 668 SAT1_CF  | blue | na |
| chrUn | 21740649 | 21740757 | 109 SAT1_CF  | blue | na |
| chrUn | 21740778 | 21741313 | 536 SAT1_CF  | blue | na |
| chrUn | 21741356 | 21742653 | 1298 SAT1_CF | blue | na |
| chrUn | 21742718 | 21743200 | 483 SAT1_CF  | blue | na |
| chrUn | 21743227 | 21743891 | 665 SAT1_CF  | blue | na |
| chrUn | 21743903 | 21744586 | 684 SAT1_CF  | blue | na |
| chrUn | 21744598 | 21745483 | 886 SAT1_CF  | blue | na |
| chrUn | 21745505 | 21746356 | 852 SAT1_CF  | blue | na |
| chrUn | 21746369 | 21747703 | 1335 SAT1_CF | blue | na |
| chrUn | 21747746 | 21748284 | 539 SAT1_CF  | blue | na |
| chrUn | 21748311 | 21748588 | 278 SAT1_CF  | blue | na |

|       |          |          |              |      |    |
|-------|----------|----------|--------------|------|----|
| chrUn | 21748602 | 21749149 | 548 SAT1_CF  | blue | na |
| chrUn | 21749192 | 21749743 | 552 SAT1_CF  | blue | na |
| chrUn | 21749755 | 21751126 | 1372 SAT1_CF | blue | na |
| chrUn | 21751169 | 21751801 | 633 SAT1_CF  | blue | na |
| chrUn | 21751829 | 21752388 | 560 SAT1_CF  | blue | na |
| chrUn | 21752468 | 21753017 | 550 SAT1_CF  | blue | na |
| chrUn | 21753045 | 21753182 | 138 SAT1_CF  | blue | na |
| chrUn | 21753229 | 21753749 | 521 SAT1_CF  | blue | na |
| chrUn | 21753778 | 21754614 | 837 SAT1_CF  | blue | na |
| chrUn | 21754699 | 21755242 | 544 SAT1_CF  | blue | na |
| chrUn | 21755334 | 21756442 | 1109 SAT1_CF | blue | na |
| chrUn | 21756516 | 21757611 | 1096 SAT1_CF | blue | na |
| chrUn | 21757625 | 21758248 | 624 SAT1_CF  | blue | na |
| chrUn | 21758260 | 21758935 | 676 SAT1_CF  | blue | na |
| chrUn | 21758996 | 21759538 | 543 SAT1_CF  | blue | na |
| chrUn | 21759635 | 21760367 | 733 SAT1_CF  | blue | na |
| chrUn | 21760380 | 21760732 | 353 SAT1_CF  | blue | na |
| chrUn | 21760849 | 21762078 | 1230 SAT1_CF | blue | na |
| chrUn | 21762090 | 21762735 | 646 SAT1_CF  | blue | na |
| chrUn | 21762759 | 21764086 | 1328 SAT1_CF | blue | na |
| chrUn | 21764115 | 21764494 | 380 SAT1_CF  | blue | na |
| chrUn | 21764537 | 21766201 | 1665 SAT1_CF | blue | na |
| chrUn | 21766214 | 21766318 | 105 SAT1_CF  | blue | na |
| chrUn | 21766343 | 21766973 | 631 SAT1_CF  | blue | na |
| chrUn | 21766987 | 21767846 | 860 SAT1_CF  | blue | na |
| chrUn | 21767887 | 21768431 | 545 SAT1_CF  | blue | na |
| chrUn | 21768469 | 21769581 | 1113 SAT1_CF | blue | na |
| chrUn | 21769763 | 21770484 | 722 SAT1_CF  | blue | na |
| chrUn | 21770497 | 21770604 | 108 SAT1_CF  | blue | na |
| chrUn | 21770625 | 21771968 | 1344 SAT1_CF | blue | na |
| chrUn | 21772178 | 21772312 | 135 SAT1_CF  | blue | na |
| chrUn | 21772399 | 21772875 | 477 SAT1_CF  | blue | na |
| chrUn | 21772892 | 21774215 | 1324 SAT1_CF | blue | na |
| chrUn | 21774230 | 21774387 | 158 SAT1_CF  | blue | na |
| chrUn | 21774413 | 21775357 | 945 SAT1_CF  | blue | na |
| chrUn | 21775397 | 21775898 | 502 SAT1_CF  | blue | na |
| chrUn | 21775911 | 21778156 | 2246 SAT1_CF | blue | na |
| chrUn | 21778169 | 21778524 | 356 SAT1_CF  | blue | na |
| chrUn | 21778640 | 21779160 | 521 SAT1_CF  | blue | na |
| chrUn | 21779191 | 21779717 | 527 SAT1_CF  | blue | na |
| chrUn | 21779761 | 21780264 | 504 SAT1_CF  | blue | na |
| chrUn | 21780278 | 21780799 | 522 SAT1_CF  | blue | na |

|       |          |          |              |        |    |
|-------|----------|----------|--------------|--------|----|
| chrUn | 21780833 | 21781212 | 380 SAT1_CF  | blue   | na |
| chrUn | 21781252 | 21781753 | 502 SAT1_CF  | blue   | na |
| chrUn | 21781766 | 21781878 | 113 SAT1_CF  | blue   | na |
| chrUn | 21782043 | 21782708 | 666 SAT1_CF  | blue   | na |
| chrUn | 21782725 | 21783948 | 1224 SAT1_CF | blue   | na |
| chrUn | 21784018 | 21784408 | 391 SAT1_CF  | blue   | na |
| chrUn | 21784439 | 21784960 | 522 SAT1_CF  | blue   | na |
| chrUn | 21784973 | 21785324 | 352 SAT1_CF  | blue   | na |
| chrUn | 21785377 | 21785877 | 501 SAT1_CF  | blue   | na |
| chrUn | 21785895 | 21786961 | 1067 SAT1_CF | blue   | na |
| chrUn | 21786987 | 21787468 | 482 SAT1_CF  | blue   | na |
| chrUn | 21787495 | 21788179 | 685 SAT1_CF  | blue   | na |
| chrUn | 21788192 | 21788827 | 636 SAT1_CF  | blue   | na |
| chrUn | 21788870 | 21790497 | 1628 SAT1_CF | blue   | na |
| chrUn | 21790540 | 21792245 | 1706 SAT1_CF | blue   | na |
| chrUn | 21795681 | 21797719 | 2039 SAT1_CF | blue   | na |
| chrUn | 21797737 | 21800052 | 2316 SAT1_CF | blue   | na |
| chrUn | 21820091 | 21821311 | 1221 Sat2CF  | purple | na |
| chrUn | 21844985 | 21846163 | 1179 Sat2CF  | purple | na |
| chrUn | 21845016 | 21846035 | 1020 Sat2CF  | purple | na |
| chrUn | 21846012 | 21846193 | 182 Sat2CF   | purple | na |
| chrUn | 21874795 | 21874941 | 147 Sat2CF   | purple | na |
| chrUn | 21874817 | 21875962 | 1146 Sat2CF  | purple | na |
| chrUn | 21891012 | 21892243 | 1232 Sat2CF  | purple | na |
| chrUn | 21891061 | 21892043 | 983 Sat2CF   | purple | na |
| chrUn | 21906693 | 21907768 | 1076 Sat2CF  | purple | na |
| chrUn | 21915472 | 21916320 | 849 Sat2CF   | purple | na |
| chrUn | 21930346 | 21931579 | 1234 Sat2CF  | purple | na |
| chrUn | 21931428 | 21931608 | 181 Sat2CF   | purple | na |
| chrUn | 21997000 | 21997167 | 168 Sat2CF   | purple | na |
| chrUn | 21997050 | 21997848 | 799 Sat2CF   | purple | na |
| chrUn | 22013107 | 22013991 | 885 Sat2CF   | purple | na |
| chrUn | 22013123 | 22013856 | 734 Sat2CF   | purple | na |
| chrUn | 22026834 | 22027579 | 746 Sat2CF   | purple | na |
| chrUn | 22049715 | 22050850 | 1136 Sat2CF  | purple | na |
| chrUn | 22075598 | 22076440 | 843 Sat2CF   | purple | na |
| chrUn | 22100237 | 22101415 | 1179 Sat2CF  | purple | na |
| chrUn | 22105239 | 22105668 | 430 CarSat1  | red    | na |
| chrUn | 22105686 | 22106404 | 719 CarSat1  | red    | na |
| chrUn | 22106399 | 22107015 | 617 SAT1_CF  | blue   | na |
| chrUn | 22107028 | 22107536 | 509 SAT1_CF  | blue   | na |
| chrUn | 22107577 | 22110685 | 3109 SAT1_CF | blue   | na |

|       |          |          |      |         |        |    |
|-------|----------|----------|------|---------|--------|----|
| chrUn | 22110687 | 22112633 | 1947 | CarSat1 | red    | na |
| chrUn | 22112659 | 22114248 | 1590 | CarSat1 | red    | na |
| chrUn | 22114333 | 22114973 | 641  | CarSat1 | red    | na |
| chrUn | 22129938 | 22130096 | 159  | Sat2CF  | purple | na |
| chrUn | 22129961 | 22130672 | 712  | Sat2CF  | purple | na |
| chrUn | 22143450 | 22143608 | 159  | Sat2CF  | purple | na |
| chrUn | 22143473 | 22144174 | 702  | Sat2CF  | purple | na |
| chrUn | 22214630 | 22214792 | 163  | Sat2CF  | purple | na |
| chrUn | 22214648 | 22215852 | 1205 | Sat2CF  | purple | na |
| chrUn | 22215723 | 22215903 | 181  | Sat2CF  | purple | na |
| chrUn | 22231629 | 22232848 | 1220 | Sat2CF  | purple | na |
| chrUn | 22252723 | 22252881 | 159  | Sat2CF  | purple | na |
| chrUn | 22252751 | 22253463 | 713  | Sat2CF  | purple | na |
| chrUn | 22253336 | 22253485 | 150  | Sat2CF  | purple | na |
| chrUn | 22253336 | 22253485 | 150  | Sat2CF  | purple | na |
| chrUn | 22272527 | 22273611 | 1085 | Sat2CF  | purple | na |
| chrUn | 22313835 | 22315086 | 1252 | Sat2CF  | purple | na |
| chrUn | 22313965 | 22315050 | 1086 | Sat2CF  | purple | na |
| chrUn | 22314926 | 22315144 | 219  | Sat2CF  | purple | na |
| chrUn | 22317962 | 22318162 | 201  | CarSat1 | red    | na |
| chrUn | 22318345 | 22319701 | 1357 | CarSat1 | red    | na |
| chrUn | 22319728 | 22321212 | 1485 | CarSat1 | red    | na |
| chrUn | 22330321 | 22331003 | 683  | CarSat1 | red    | na |
| chrUn | 22331021 | 22332540 | 1520 | CarSat1 | red    | na |
| chrUn | 22332559 | 22332960 | 402  | CarSat1 | red    | na |
| chrUn | 22333013 | 22334365 | 1353 | SAT1_CF | blue   | na |
| chrUn | 22334560 | 22334721 | 162  | Sat2CF  | purple | na |
| chrUn | 22334593 | 22335676 | 1084 | Sat2CF  | purple | na |
| chrUn | 22340864 | 22341577 | 714  | CarSat1 | red    | na |
| chrUn | 22341770 | 22343388 | 1619 | CarSat1 | red    | na |
| chrUn | 22343413 | 22344123 | 711  | CarSat1 | red    | na |
| chrUn | 22344149 | 22344859 | 711  | CarSat1 | red    | na |
| chrUn | 22344885 | 22346081 | 1197 | CarSat1 | red    | na |
| chrUn | 22346108 | 22348547 | 2440 | CarSat1 | red    | na |
| chrUn | 22348563 | 22349165 | 603  | CarSat1 | red    | na |
| chrUn | 22349433 | 22350508 | 1076 | CarSat1 | red    | na |
| chrUn | 22350535 | 22352716 | 2182 | CarSat1 | red    | na |
| chrUn | 22352743 | 22353505 | 763  | CarSat1 | red    | na |
| chrUn | 22467934 | 22469069 | 1136 | Sat2CF  | purple | na |
| chrUn | 22468068 | 22469154 | 1087 | Sat2CF  | purple | na |
| chrUn | 22469030 | 22469179 | 150  | Sat2CF  | purple | na |
| chrUn | 22493440 | 22494304 | 865  | Sat2CF  | purple | na |

|       |          |          |              |        |    |
|-------|----------|----------|--------------|--------|----|
| chrUn | 22493582 | 22494389 | 808 Sat2CF   | purple | na |
| chrUn | 22539151 | 22539819 | 669 SAT1_CF  | blue   | na |
| chrUn | 22539832 | 22540535 | 704 SAT1_CF  | blue   | na |
| chrUn | 22540557 | 22542912 | 2356 SAT1_CF | blue   | na |
| chrUn | 22542926 | 22543061 | 136 SAT1_CF  | blue   | na |
| chrUn | 22543108 | 22543628 | 521 SAT1_CF  | blue   | na |
| chrUn | 22543641 | 22544321 | 681 SAT1_CF  | blue   | na |
| chrUn | 22544333 | 22545092 | 760 SAT1_CF  | blue   | na |
| chrUn | 22545106 | 22545779 | 674 SAT1_CF  | blue   | na |
| chrUn | 22545822 | 22546821 | 1000 SAT1_CF | blue   | na |
| chrUn | 22546865 | 22547492 | 628 SAT1_CF  | blue   | na |
| chrUn | 22547554 | 22548306 | 753 SAT1_CF  | blue   | na |
| chrUn | 22548321 | 22548923 | 603 SAT1_CF  | blue   | na |
| chrUn | 22548934 | 22549861 | 928 SAT1_CF  | blue   | na |
| chrUn | 22550186 | 22550595 | 410 SAT1_CF  | blue   | na |
| chrUn | 22550616 | 22550681 | 66 SAT1_CF   | blue   | na |
| chrUn | 22550702 | 22551332 | 631 SAT1_CF  | blue   | na |
| chrUn | 22551353 | 22551418 | 66 SAT1_CF   | blue   | na |
| chrUn | 22551439 | 22551958 | 520 SAT1_CF  | blue   | na |
| chrUn | 22551970 | 22553304 | 1335 SAT1_CF | blue   | na |
| chrUn | 22553329 | 22553780 | 452 SAT1_CF  | blue   | na |
| chrUn | 22553795 | 22554568 | 774 SAT1_CF  | blue   | na |
| chrUn | 22554749 | 22554932 | 184 SAT1_CF  | blue   | na |
| chrUn | 22554972 | 22555472 | 501 SAT1_CF  | blue   | na |
| chrUn | 22555485 | 22555590 | 106 SAT1_CF  | blue   | na |
| chrUn | 22555613 | 22557560 | 1948 SAT1_CF | blue   | na |
| chrUn | 22557572 | 22558244 | 673 SAT1_CF  | blue   | na |
| chrUn | 22558287 | 22559288 | 1002 SAT1_CF | blue   | na |
| chrUn | 22559343 | 22559950 | 608 SAT1_CF  | blue   | na |
| chrUn | 22559963 | 22560318 | 356 SAT1_CF  | blue   | na |
| chrUn | 22560435 | 22560953 | 519 SAT1_CF  | blue   | na |
| chrUn | 22560984 | 22562057 | 1074 SAT1_CF | blue   | na |
| chrUn | 22562071 | 22562997 | 927 SAT1_CF  | blue   | na |
| chrUn | 22563046 | 22563547 | 502 SAT1_CF  | blue   | na |
| chrUn | 22563561 | 22564319 | 759 SAT1_CF  | blue   | na |
| chrUn | 22564331 | 22564440 | 110 SAT1_CF  | blue   | na |
| chrUn | 22564461 | 22565005 | 545 SAT1_CF  | blue   | na |
| chrUn | 22565066 | 22565614 | 549 SAT1_CF  | blue   | na |
| chrUn | 22565656 | 22566199 | 544 SAT1_CF  | blue   | na |
| chrUn | 22566237 | 22567191 | 955 SAT1_CF  | blue   | na |
| chrUn | 22567218 | 22568399 | 1182 SAT1_CF | blue   | na |
| chrUn | 22568431 | 22568586 | 156 SAT1_CF  | blue   | na |



|       |          |          |              |      |    |
|-------|----------|----------|--------------|------|----|
| chrUn | 22568612 | 22569131 | 520 SAT1_CF  | blue | na |
| chrUn | 22569144 | 22569818 | 675 SAT1_CF  | blue | na |
| chrUn | 22569861 | 22570826 | 966 SAT1_CF  | blue | na |
| chrUn | 22570904 | 22571815 | 912 SAT1_CF  | blue | na |
| chrUn | 22571934 | 22572470 | 537 SAT1_CF  | blue | na |
| chrUn | 22572490 | 22572597 | 108 SAT1_CF  | blue | na |
| chrUn | 22572618 | 22573173 | 556 SAT1_CF  | blue | na |
| chrUn | 22573185 | 22574868 | 1684 SAT1_CF | blue | na |
| chrUn | 22574883 | 22575019 | 137 SAT1_CF  | blue | na |
| chrUn | 22575085 | 22575586 | 502 SAT1_CF  | blue | na |
| chrUn | 22575599 | 22576929 | 1331 SAT1_CF | blue | na |
| chrUn | 22576975 | 22578203 | 1229 SAT1_CF | blue | na |
| chrUn | 22578231 | 22578367 | 137 SAT1_CF  | blue | na |
| chrUn | 22578433 | 22578934 | 502 SAT1_CF  | blue | na |
| chrUn | 22578957 | 22579627 | 671 SAT1_CF  | blue | na |
| chrUn | 22579639 | 22579755 | 117 SAT1_CF  | blue | na |
| chrUn | 22579768 | 22581971 | 2204 SAT1_CF | blue | na |
| chrUn | 22581982 | 22582384 | 403 SAT1_CF  | blue | na |
| chrUn | 22582426 | 22582919 | 494 SAT1_CF  | blue | na |
| chrUn | 22582939 | 22583621 | 683 SAT1_CF  | blue | na |
| chrUn | 22583634 | 22584316 | 683 SAT1_CF  | blue | na |
| chrUn | 22584328 | 22585189 | 862 SAT1_CF  | blue | na |
| chrUn | 22585231 | 22586045 | 815 SAT1_CF  | blue | na |
| chrUn | 22586090 | 22587115 | 1026 SAT1_CF | blue | na |
| chrUn | 22587128 | 22588913 | 1786 SAT1_CF | blue | na |
| chrUn | 22588956 | 22589158 | 203 SAT1_CF  | blue | na |
| chrUn | 22589339 | 22589524 | 186 SAT1_CF  | blue | na |
| chrUn | 22589541 | 22590060 | 520 SAT1_CF  | blue | na |
| chrUn | 22590073 | 22590178 | 106 SAT1_CF  | blue | na |
| chrUn | 22590201 | 22590832 | 632 SAT1_CF  | blue | na |
| chrUn | 22590856 | 22591880 | 1025 SAT1_CF | blue | na |
| chrUn | 22591905 | 22592915 | 1011 SAT1_CF | blue | na |
| chrUn | 22592958 | 22593505 | 548 SAT1_CF  | blue | na |
| chrUn | 22593533 | 22593669 | 137 SAT1_CF  | blue | na |
| chrUn | 22593735 | 22594236 | 502 SAT1_CF  | blue | na |
| chrUn | 22594259 | 22594932 | 674 SAT1_CF  | blue | na |
| chrUn | 22594944 | 22595617 | 674 SAT1_CF  | blue | na |
| chrUn | 22595666 | 22596641 | 976 SAT1_CF  | blue | na |
| chrUn | 22596657 | 22597551 | 895 SAT1_CF  | blue | na |
| chrUn | 22597563 | 22598166 | 604 SAT1_CF  | blue | na |
| chrUn | 22598179 | 22598284 | 106 SAT1_CF  | blue | na |
| chrUn | 22598305 | 22598780 | 476 SAT1_CF  | blue | na |

|       |          |          |              |      |    |
|-------|----------|----------|--------------|------|----|
| chrUn | 22598792 | 22599657 | 866 SAT1_CF  | blue | na |
| chrUn | 22599699 | 22601393 | 1695 SAT1_CF | blue | na |
| chrUn | 22601573 | 22601756 | 184 SAT1_CF  | blue | na |
| chrUn | 22601777 | 22602296 | 520 SAT1_CF  | blue | na |
| chrUn | 22602309 | 22602414 | 106 SAT1_CF  | blue | na |
| chrUn | 22602437 | 22603707 | 1271 SAT1_CF | blue | na |
| chrUn | 22603722 | 22603858 | 137 SAT1_CF  | blue | na |
| chrUn | 22603924 | 22604426 | 503 SAT1_CF  | blue | na |
| chrUn | 22604439 | 22604545 | 107 SAT1_CF  | blue | na |
| chrUn | 22604567 | 22605039 | 473 SAT1_CF  | blue | na |
| chrUn | 22605051 | 22605713 | 663 SAT1_CF  | blue | na |
| chrUn | 22605756 | 22607380 | 1625 SAT1_CF | blue | na |
| chrUn | 22607412 | 22607777 | 366 SAT1_CF  | blue | na |
| chrUn | 22607811 | 22609267 | 1457 SAT1_CF | blue | na |
| chrUn | 22609282 | 22609834 | 553 SAT1_CF  | blue | na |
| chrUn | 22609856 | 22610490 | 635 SAT1_CF  | blue | na |
| chrUn | 22610533 | 22610969 | 437 SAT1_CF  | blue | na |
| chrUn | 22610981 | 22612114 | 1134 SAT1_CF | blue | na |
| chrUn | 22612129 | 22612287 | 159 SAT1_CF  | blue | na |
| chrUn | 22612331 | 22612826 | 496 SAT1_CF  | blue | na |
| chrUn | 22612845 | 22613528 | 684 SAT1_CF  | blue | na |
| chrUn | 22613540 | 22614217 | 678 SAT1_CF  | blue | na |
| chrUn | 22614314 | 22616413 | 2100 SAT1_CF | blue | na |
| chrUn | 22616457 | 22617019 | 563 SAT1_CF  | blue | na |
| chrUn | 22617103 | 22618104 | 1002 SAT1_CF | blue | na |
| chrUn | 22618147 | 22618696 | 550 SAT1_CF  | blue | na |
| chrUn | 22618773 | 22619317 | 545 SAT1_CF  | blue | na |
| chrUn | 22619330 | 22619406 | 77 SAT1_CF   | blue | na |
| chrUn | 22619424 | 22619987 | 564 SAT1_CF  | blue | na |
| chrUn | 22619999 | 22620750 | 752 SAT1_CF  | blue | na |
| chrUn | 22620761 | 22621592 | 832 SAT1_CF  | blue | na |
| chrUn | 22621623 | 22622132 | 510 SAT1_CF  | blue | na |
| chrUn | 22622143 | 22622545 | 403 SAT1_CF  | blue | na |
| chrUn | 22622585 | 22623086 | 502 SAT1_CF  | blue | na |
| chrUn | 22623099 | 22624556 | 1458 SAT1_CF | blue | na |
| chrUn | 22624604 | 22625089 | 486 SAT1_CF  | blue | na |
| chrUn | 22625344 | 22625478 | 135 SAT1_CF  | blue | na |
| chrUn | 22625525 | 22626043 | 519 SAT1_CF  | blue | na |
| chrUn | 22626056 | 22627420 | 1365 SAT1_CF | blue | na |
| chrUn | 22627464 | 22627893 | 430 SAT1_CF  | blue | na |
| chrUn | 22627910 | 22628798 | 889 SAT1_CF  | blue | na |
| chrUn | 22628885 | 22629623 | 739 SAT1_CF  | blue | na |

|       |          |          |              |      |    |
|-------|----------|----------|--------------|------|----|
| chrUn | 22629646 | 22630170 | 525 SAT1_CF  | blue | na |
| chrUn | 22630192 | 22631371 | 1180 SAT1_CF | blue | na |
| chrUn | 22631468 | 22632231 | 764 SAT1_CF  | blue | na |
| chrUn | 22632245 | 22633613 | 1369 SAT1_CF | blue | na |
| chrUn | 22633659 | 22634579 | 921 SAT1_CF  | blue | na |
| chrUn | 22634695 | 22635244 | 550 SAT1_CF  | blue | na |
| chrUn | 22635256 | 22635653 | 398 SAT1_CF  | blue | na |
| chrUn | 22635713 | 22636195 | 483 SAT1_CF  | blue | na |
| chrUn | 22636207 | 22636892 | 686 SAT1_CF  | blue | na |
| chrUn | 22636914 | 22637579 | 666 SAT1_CF  | blue | na |
| chrUn | 22637624 | 22638843 | 1220 SAT1_CF | blue | na |
| chrUn | 22638924 | 22639448 | 525 SAT1_CF  | blue | na |
| chrUn | 22639463 | 22639620 | 158 SAT1_CF  | blue | na |
| chrUn | 22639646 | 22640166 | 521 SAT1_CF  | blue | na |
| chrUn | 22640308 | 22640820 | 513 SAT1_CF  | blue | na |
| chrUn | 22640864 | 22641662 | 799 SAT1_CF  | blue | na |
| chrUn | 22641705 | 22642287 | 583 SAT1_CF  | blue | na |
| chrUn | 22642330 | 22642817 | 488 SAT1_CF  | blue | na |
| chrUn | 22642868 | 22643025 | 158 SAT1_CF  | blue | na |
| chrUn | 22643070 | 22643572 | 503 SAT1_CF  | blue | na |
| chrUn | 22643584 | 22643690 | 107 SAT1_CF  | blue | na |
| chrUn | 22643713 | 22644387 | 675 SAT1_CF  | blue | na |
| chrUn | 22644409 | 22645737 | 1329 SAT1_CF | blue | na |
| chrUn | 22645768 | 22646254 | 487 SAT1_CF  | blue | na |
| chrUn | 22646305 | 22646462 | 158 SAT1_CF  | blue | na |
| chrUn | 22646507 | 22647008 | 502 SAT1_CF  | blue | na |
| chrUn | 22647020 | 22648827 | 1808 SAT1_CF | blue | na |
| chrUn | 22648845 | 22649367 | 523 SAT1_CF  | blue | na |
| chrUn | 22649378 | 22649732 | 355 SAT1_CF  | blue | na |
| chrUn | 22649838 | 22652309 | 2472 SAT1_CF | blue | na |
| chrUn | 22652491 | 22652676 | 186 SAT1_CF  | blue | na |
| chrUn | 22652732 | 22653205 | 474 SAT1_CF  | blue | na |
| chrUn | 22653218 | 22653326 | 109 SAT1_CF  | blue | na |
| chrUn | 22653347 | 22654331 | 985 SAT1_CF  | blue | na |
| chrUn | 22654418 | 22654919 | 502 SAT1_CF  | blue | na |
| chrUn | 22654937 | 22655606 | 670 SAT1_CF  | blue | na |
| chrUn | 22655640 | 22656415 | 776 SAT1_CF  | blue | na |
| chrUn | 22656426 | 22656823 | 398 SAT1_CF  | blue | na |
| chrUn | 22656868 | 22657957 | 1090 SAT1_CF | blue | na |
| chrUn | 22657975 | 22659300 | 1326 SAT1_CF | blue | na |
| chrUn | 22659343 | 22659649 | 307 SAT1_CF  | blue | na |
| chrUn | 22659727 | 22660235 | 509 SAT1_CF  | blue | na |

|       |          |          |              |      |    |
|-------|----------|----------|--------------|------|----|
| chrUn | 22660249 | 22660899 | 651 SAT1_CF  | blue | na |
| chrUn | 22660921 | 22661672 | 752 SAT1_CF  | blue | na |
| chrUn | 22661685 | 22662301 | 617 SAT1_CF  | blue | na |
| chrUn | 22662515 | 22662669 | 155 SAT1_CF  | blue | na |
| chrUn | 22662714 | 22663332 | 619 SAT1_CF  | blue | na |
| chrUn | 22663355 | 22664815 | 1461 SAT1_CF | blue | na |
| chrUn | 22664902 | 22665401 | 500 SAT1_CF  | blue | na |
| chrUn | 22665424 | 22666217 | 794 SAT1_CF  | blue | na |
| chrUn | 22666239 | 22666784 | 546 SAT1_CF  | blue | na |
| chrUn | 22666827 | 22667730 | 904 SAT1_CF  | blue | na |
| chrUn | 22667744 | 22668291 | 548 SAT1_CF  | blue | na |
| chrUn | 22669719 | 22670289 | 571 SAT1_CF  | blue | na |
| chrUn | 22670332 | 22670826 | 495 SAT1_CF  | blue | na |
| chrUn | 22670846 | 22671530 | 685 SAT1_CF  | blue | na |
| chrUn | 22671542 | 22672739 | 1198 SAT1_CF | blue | na |
| chrUn | 22672781 | 22673323 | 543 SAT1_CF  | blue | na |
| chrUn | 22673423 | 22675158 | 1736 SAT1_CF | blue | na |
| chrUn | 22675172 | 22675277 | 106 SAT1_CF  | blue | na |
| chrUn | 22675300 | 22675859 | 560 SAT1_CF  | blue | na |
| chrUn | 22675903 | 22677499 | 1597 SAT1_CF | blue | na |
| chrUn | 22677511 | 22678187 | 677 SAT1_CF  | blue | na |
| chrUn | 22678235 | 22679192 | 958 SAT1_CF  | blue | na |
| chrUn | 22679271 | 22680231 | 961 SAT1_CF  | blue | na |
| chrUn | 22680271 | 22680771 | 501 SAT1_CF  | blue | na |
| chrUn | 22680790 | 22680893 | 104 SAT1_CF  | blue | na |
| chrUn | 22680914 | 22682113 | 1200 SAT1_CF | blue | na |
| chrUn | 22682157 | 22683363 | 1207 SAT1_CF | blue | na |
| chrUn | 22683378 | 22683514 | 137 SAT1_CF  | blue | na |
| chrUn | 22683561 | 22684080 | 520 SAT1_CF  | blue | na |
| chrUn | 22684102 | 22684808 | 707 SAT1_CF  | blue | na |
| chrUn | 22684851 | 22685578 | 728 SAT1_CF  | blue | na |
| chrUn | 22685605 | 22686129 | 525 SAT1_CF  | blue | na |
| chrUn | 22686174 | 22687466 | 1293 SAT1_CF | blue | na |
| chrUn | 22687547 | 22687773 | 227 SAT1_CF  | blue | na |
| chrUn | 22687784 | 22688566 | 783 SAT1_CF  | blue | na |
| chrUn | 22688594 | 22689239 | 646 SAT1_CF  | blue | na |
| chrUn | 22689262 | 22689836 | 575 SAT1_CF  | blue | na |
| chrUn | 22689848 | 22690611 | 764 SAT1_CF  | blue | na |
| chrUn | 22690625 | 22691270 | 646 SAT1_CF  | blue | na |
| chrUn | 22691282 | 22694603 | 3322 SAT1_CF | blue | na |
| chrUn | 22694645 | 22694810 | 166 SAT1_CF  | blue | na |
| chrUn | 22694991 | 22695176 | 186 SAT1_CF  | blue | na |

|       |          |          |              |      |    |
|-------|----------|----------|--------------|------|----|
| chrUn | 22695193 | 22695706 | 514 SAT1_CF  | blue | na |
| chrUn | 22695726 | 22695834 | 109 SAT1_CF  | blue | na |
| chrUn | 22695854 | 22696413 | 560 SAT1_CF  | blue | na |
| chrUn | 22696425 | 22698946 | 2522 SAT1_CF | blue | na |
| chrUn | 22698958 | 22699436 | 479 SAT1_CF  | blue | na |
| chrUn | 22699626 | 22701250 | 1625 SAT1_CF | blue | na |
| chrUn | 22701366 | 22701762 | 397 SAT1_CF  | blue | na |
| chrUn | 22701830 | 22702349 | 520 SAT1_CF  | blue | na |
| chrUn | 22702362 | 22703041 | 680 SAT1_CF  | blue | na |
| chrUn | 22703053 | 22703813 | 761 SAT1_CF  | blue | na |
| chrUn | 22703827 | 22704502 | 676 SAT1_CF  | blue | na |
| chrUn | 22704545 | 22706171 | 1627 SAT1_CF | blue | na |
| chrUn | 22706252 | 22706417 | 166 SAT1_CF  | blue | na |
| chrUn | 22706599 | 22706776 | 178 SAT1_CF  | blue | na |
| chrUn | 22706822 | 22707321 | 500 SAT1_CF  | blue | na |
| chrUn | 22707334 | 22708494 | 1161 SAT1_CF | blue | na |
| chrUn | 22708536 | 22709080 | 545 SAT1_CF  | blue | na |
| chrUn | 22709092 | 22710411 | 1320 SAT1_CF | blue | na |
| chrUn | 22710454 | 22710826 | 373 SAT1_CF  | blue | na |
| chrUn | 22710862 | 22711362 | 501 SAT1_CF  | blue | na |
| chrUn | 22711376 | 22712059 | 684 SAT1_CF  | blue | na |
| chrUn | 22712081 | 22713229 | 1149 SAT1_CF | blue | na |
| chrUn | 22713267 | 22713881 | 615 SAT1_CF  | blue | na |
| chrUn | 22713893 | 22714655 | 763 SAT1_CF  | blue | na |
| chrUn | 22714668 | 22715236 | 569 SAT1_CF  | blue | na |
| chrUn | 22715248 | 22715877 | 630 SAT1_CF  | blue | na |
| chrUn | 22715888 | 22716437 | 550 SAT1_CF  | blue | na |
| chrUn | 22716449 | 22716558 | 110 SAT1_CF  | blue | na |
| chrUn | 22716578 | 22717132 | 555 SAT1_CF  | blue | na |
| chrUn | 22717144 | 22717814 | 671 SAT1_CF  | blue | na |
| chrUn | 22717901 | 22718400 | 500 SAT1_CF  | blue | na |
| chrUn | 22718449 | 22719738 | 1290 SAT1_CF | blue | na |
| chrUn | 22719753 | 22719889 | 137 SAT1_CF  | blue | na |
| chrUn | 22719974 | 22720577 | 604 SAT1_CF  | blue | na |
| chrUn | 22720598 | 22721153 | 556 SAT1_CF  | blue | na |
| chrUn | 22721164 | 22721766 | 603 SAT1_CF  | blue | na |
| chrUn | 22721778 | 22722451 | 674 SAT1_CF  | blue | na |
| chrUn | 22722494 | 22724009 | 1516 SAT1_CF | blue | na |
| chrUn | 22724125 | 22724645 | 521 SAT1_CF  | blue | na |
| chrUn | 22724676 | 22726519 | 1844 SAT1_CF | blue | na |
| chrUn | 22726534 | 22727237 | 704 SAT1_CF  | blue | na |
| chrUn | 22727262 | 22728803 | 1542 SAT1_CF | blue | na |

|       |          |          |              |      |    |
|-------|----------|----------|--------------|------|----|
| chrUn | 22728845 | 22729626 | 782 SAT1_CF  | blue | na |
| chrUn | 22729704 | 22730210 | 507 SAT1_CF  | blue | na |
| chrUn | 22730224 | 22730579 | 356 SAT1_CF  | blue | na |
| chrUn | 22730685 | 22731166 | 482 SAT1_CF  | blue | na |
| chrUn | 22731179 | 22731861 | 683 SAT1_CF  | blue | na |
| chrUn | 22731873 | 22732732 | 860 SAT1_CF  | blue | na |
| chrUn | 22732774 | 22734433 | 1660 SAT1_CF | blue | na |
| chrUn | 22734466 | 22735170 | 705 SAT1_CF  | blue | na |
| chrUn | 22735184 | 22735787 | 604 SAT1_CF  | blue | na |
| chrUn | 22735799 | 22736484 | 686 SAT1_CF  | blue | na |
| chrUn | 22736496 | 22737331 | 836 SAT1_CF  | blue | na |
| chrUn | 22737345 | 22738020 | 676 SAT1_CF  | blue | na |
| chrUn | 22738063 | 22738401 | 339 SAT1_CF  | blue | na |
| chrUn | 22738431 | 22738957 | 527 SAT1_CF  | blue | na |
| chrUn | 22738970 | 22739076 | 107 SAT1_CF  | blue | na |
| chrUn | 22739098 | 22740912 | 1815 SAT1_CF | blue | na |
| chrUn | 22740927 | 22741062 | 136 SAT1_CF  | blue | na |
| chrUn | 22741128 | 22741630 | 503 SAT1_CF  | blue | na |
| chrUn | 22741642 | 22741748 | 107 SAT1_CF  | blue | na |
| chrUn | 22741772 | 22742399 | 628 SAT1_CF  | blue | na |
| chrUn | 22742423 | 22743281 | 859 SAT1_CF  | blue | na |
| chrUn | 22743308 | 22744300 | 993 SAT1_CF  | blue | na |
| chrUn | 22744349 | 22744850 | 502 SAT1_CF  | blue | na |
| chrUn | 22744863 | 22746087 | 1225 SAT1_CF | blue | na |
| chrUn | 22746148 | 22746309 | 162 SAT1_CF  | blue | na |
| chrUn | 22746373 | 22746884 | 512 SAT1_CF  | blue | na |
| chrUn | 22746912 | 22747048 | 137 SAT1_CF  | blue | na |
| chrUn | 22747134 | 22747615 | 482 SAT1_CF  | blue | na |
| chrUn | 22747633 | 22748310 | 678 SAT1_CF  | blue | na |
| chrUn | 22748323 | 22749655 | 1333 SAT1_CF | blue | na |
| chrUn | 22749698 | 22750329 | 632 SAT1_CF  | blue | na |
| chrUn | 22750431 | 22750958 | 528 SAT1_CF  | blue | na |
| chrUn | 22751000 | 22751526 | 527 SAT1_CF  | blue | na |
| chrUn | 22751541 | 22751697 | 157 SAT1_CF  | blue | na |
| chrUn | 22751723 | 22752243 | 521 SAT1_CF  | blue | na |
| chrUn | 22752256 | 22752940 | 685 SAT1_CF  | blue | na |
| chrUn | 22752952 | 22753710 | 759 SAT1_CF  | blue | na |
| chrUn | 22753724 | 22754395 | 672 SAT1_CF  | blue | na |
| chrUn | 22754438 | 22755430 | 993 SAT1_CF  | blue | na |
| chrUn | 22755474 | 22756022 | 549 SAT1_CF  | blue | na |
| chrUn | 22756035 | 22756699 | 665 SAT1_CF  | blue | na |
| chrUn | 22756742 | 22757373 | 632 SAT1_CF  | blue | na |

|       |          |          |              |      |    |
|-------|----------|----------|--------------|------|----|
| chrUn | 22757400 | 22757963 | 564 SAT1_CF  | blue | na |
| chrUn | 22758043 | 22758309 | 267 SAT1_CF  | blue | na |
| chrUn | 22758375 | 22758916 | 542 SAT1_CF  | blue | na |
| chrUn | 22758987 | 22759619 | 633 SAT1_CF  | blue | na |
| chrUn | 22759631 | 22760672 | 1042 SAT1_CF | blue | na |
| chrUn | 22760686 | 22761233 | 548 SAT1_CF  | blue | na |
| chrUn | 22761313 | 22761800 | 488 SAT1_CF  | blue | na |
| chrUn | 22761856 | 22762008 | 153 SAT1_CF  | blue | na |
| chrUn | 22762053 | 22762553 | 501 SAT1_CF  | blue | na |
| chrUn | 22762566 | 22762674 | 109 SAT1_CF  | blue | na |
| chrUn | 22762695 | 22763891 | 1197 SAT1_CF | blue | na |
| chrUn | 22763912 | 22764711 | 800 SAT1_CF  | blue | na |
| chrUn | 22764766 | 22765207 | 442 SAT1_CF  | blue | na |
| chrUn | 22766621 | 22767194 | 574 SAT1_CF  | blue | na |
| chrUn | 22767234 | 22768430 | 1197 SAT1_CF | blue | na |
| chrUn | 22768442 | 22769119 | 678 SAT1_CF  | blue | na |
| chrUn | 22769161 | 22769793 | 633 SAT1_CF  | blue | na |
| chrUn | 22769821 | 22770385 | 565 SAT1_CF  | blue | na |
| chrUn | 22770465 | 22770989 | 525 SAT1_CF  | blue | na |
| chrUn | 22771004 | 22771161 | 158 SAT1_CF  | blue | na |
| chrUn | 22771206 | 22771708 | 503 SAT1_CF  | blue | na |
| chrUn | 22771719 | 22772402 | 684 SAT1_CF  | blue | na |
| chrUn | 22772414 | 22773086 | 673 SAT1_CF  | blue | na |
| chrUn | 22773133 | 22773507 | 375 SAT1_CF  | blue | na |
| chrUn | 22773546 | 22774065 | 520 SAT1_CF  | blue | na |
| chrUn | 22774078 | 22775669 | 1592 SAT1_CF | blue | na |
| chrUn | 22775735 | 22777086 | 1352 SAT1_CF | blue | na |
| chrUn | 22777111 | 22777773 | 663 SAT1_CF  | blue | na |
| chrUn | 22777816 | 22778813 | 998 SAT1_CF  | blue | na |
| chrUn | 22778857 | 22779813 | 957 SAT1_CF  | blue | na |
| chrUn | 22779856 | 22780358 | 503 SAT1_CF  | blue | na |
| chrUn | 22780370 | 22780473 | 104 SAT1_CF  | blue | na |
| chrUn | 22780499 | 22781053 | 555 SAT1_CF  | blue | na |
| chrUn | 22781077 | 22781741 | 665 SAT1_CF  | blue | na |
| chrUn | 22781784 | 22782416 | 633 SAT1_CF  | blue | na |
| chrUn | 22782444 | 22783006 | 563 SAT1_CF  | blue | na |
| chrUn | 22783086 | 22783566 | 481 SAT1_CF  | blue | na |
| chrUn | 22783618 | 22783754 | 137 SAT1_CF  | blue | na |
| chrUn | 22783801 | 22784320 | 520 SAT1_CF  | blue | na |
| chrUn | 22784333 | 22784641 | 309 SAT1_CF  | blue | na |
| chrUn | 22784654 | 22784725 | 72 SAT1_CF   | blue | na |
| chrUn | 22784747 | 22785188 | 442 SAT1_CF  | blue | na |

|       |          |          |              |        |    |
|-------|----------|----------|--------------|--------|----|
| chrUn | 22785229 | 22785729 | 501 SAT1_CF  | blue   | na |
| chrUn | 22785742 | 22786425 | 684 SAT1_CF  | blue   | na |
| chrUn | 22786443 | 22786561 | 119 SAT1_CF  | blue   | na |
| chrUn | 22786572 | 22788113 | 1542 SAT1_CF | blue   | na |
| chrUn | 22788125 | 22788801 | 677 SAT1_CF  | blue   | na |
| chrUn | 22788814 | 22789798 | 985 SAT1_CF  | blue   | na |
| chrUn | 22789825 | 22791780 | 1956 SAT1_CF | blue   | na |
| chrUn | 22791808 | 22791965 | 158 SAT1_CF  | blue   | na |
| chrUn | 22791991 | 22793020 | 1030 SAT1_CF | blue   | na |
| chrUn | 22793032 | 22794526 | 1495 SAT1_CF | blue   | na |
| chrUn | 22794623 | 22795718 | 1096 SAT1_CF | blue   | na |
| chrUn | 22795805 | 22796307 | 503 SAT1_CF  | blue   | na |
| chrUn | 22796320 | 22797004 | 685 SAT1_CF  | blue   | na |
| chrUn | 22797016 | 22797321 | 306 SAT1_CF  | blue   | na |
| chrUn | 22797320 | 22797552 | 233 CarSat1  | red    | na |
| chrUn | 22797702 | 22798549 | 848 CarSat1  | red    | na |
| chrUn | 22798579 | 22799532 | 954 CarSat1  | red    | na |
| chrUn | 22824216 | 22825398 | 1183 Sat2CF  | purple | na |
| chrUn | 22828299 | 22829828 | 1530 CarSat1 | red    | na |
| chrUn | 22829849 | 22831333 | 1485 CarSat1 | red    | na |
| chrUn | 22840426 | 22840799 | 374 CarSat1  | red    | na |
| chrUn | 22841331 | 22842236 | 906 CarSat1  | red    | na |
| chrUn | 22842270 | 22844051 | 1782 CarSat1 | red    | na |
| chrUn | 22844070 | 22844471 | 402 CarSat1  | red    | na |
| chrUn | 22844487 | 22845649 | 1163 SAT1_CF | blue   | na |
| chrUn | 22852887 | 22854426 | 1540 CarSat1 | red    | na |
| chrUn | 22854635 | 22855226 | 592 CarSat1  | red    | na |
| chrUn | 22855874 | 22858279 | 2406 CarSat1 | red    | na |
| chrUn | 22858295 | 22862966 | 4672 CarSat1 | red    | na |
| chrUn | 22863208 | 22867585 | 4378 CarSat1 | red    | na |
| chrUn | 22867612 | 22870039 | 2428 CarSat1 | red    | na |
| chrUn | 22870063 | 22870774 | 712 CarSat1  | red    | na |
| chrUn | 22870807 | 22872740 | 1934 CarSat1 | red    | na |
| chrUn | 22872767 | 22873713 | 947 CarSat1  | red    | na |
| chrUn | 22873754 | 22874460 | 707 CarSat1  | red    | na |
| chrUn | 22874494 | 22875679 | 1186 CarSat1 | red    | na |
| chrUn | 22875700 | 22876872 | 1173 CarSat1 | red    | na |
| chrUn | 22876894 | 22877021 | 128 Carsat2  | orange | na |
| chrUn | 22876909 | 22878141 | 1233 CarSat1 | red    | na |
| chrUn | 22878157 | 22879612 | 1456 CarSat1 | red    | na |
| chrUn | 22879645 | 22880505 | 861 CarSat1  | red    | na |
| chrUn | 22880734 | 22882758 | 2025 CarSat1 | red    | na |



|       |          |          |      |         |        |    |
|-------|----------|----------|------|---------|--------|----|
| chrUn | 22882774 | 22889099 | 6326 | CarSat1 | red    | na |
| chrUn | 22889133 | 22894521 | 5389 | CarSat1 | red    | na |
| chrUn | 22894537 | 22895255 | 719  | CarSat1 | red    | na |
| chrUn | 22895271 | 22897461 | 2191 | CarSat1 | red    | na |
| chrUn | 22897487 | 22899663 | 2177 | CarSat1 | red    | na |
| chrUn | 22899687 | 22900407 | 721  | CarSat1 | red    | na |
| chrUn | 22900433 | 22904572 | 4140 | CarSat1 | red    | na |
| chrUn | 22904599 | 22905033 | 435  | CarSat1 | red    | na |
| chrUn | 22905067 | 22905773 | 707  | CarSat1 | red    | na |
| chrUn | 22905804 | 22906290 | 487  | CarSat1 | red    | na |
| chrUn | 22906314 | 22908542 | 2229 | CarSat1 | red    | na |
| chrUn | 22908576 | 22912003 | 3428 | CarSat1 | red    | na |
| chrUn | 22912028 | 22912656 | 629  | CarSat1 | red    | na |
| chrUn | 22920332 | 22921104 | 773  | Sat2CF  | purple | na |
| chrUn | 22949956 | 22951114 | 1159 | Sat2CF  | purple | na |
| chrUn | 22968406 | 22969572 | 1167 | Sat2CF  | purple | na |
| chrUn | 22978555 | 22979109 | 555  | Sat2CF  | purple | na |
| chrUn | 22978980 | 22979157 | 178  | Sat2CF  | purple | na |
| chrUn | 22994032 | 22994853 | 822  | Sat2CF  | purple | na |
| chrUn | 22994106 | 22994831 | 726  | Sat2CF  | purple | na |
| chrUn | 22994722 | 22994890 | 169  | Sat2CF  | purple | na |
| chrUn | 23007580 | 23008832 | 1253 | Sat2CF  | purple | na |
| chrUn | 23011500 | 23013040 | 1541 | CarSat1 | red    | na |
| chrUn | 23013067 | 23014551 | 1485 | CarSat1 | red    | na |
| chrUn | 23024047 | 23024475 | 429  | CarSat1 | red    | na |
| chrUn | 23024487 | 23026265 | 1779 | CarSat1 | red    | na |
| chrUn | 23026284 | 23026685 | 402  | CarSat1 | red    | na |
| chrUn | 23026701 | 23028090 | 1390 | SAT1_CF | blue   | na |
| chrUn | 23028285 | 23028445 | 161  | Sat2CF  | purple | na |
| chrUn | 23028296 | 23028475 | 180  | Sat2CF  | purple | na |
| chrUn | 23028319 | 23028475 | 157  | Sat2CF  | purple | na |
| chrUn | 23028681 | 23029482 | 802  | Sat2CF  | purple | na |
| chrUn | 23029166 | 23029543 | 378  | Sat2CF  | purple | na |
| chrUn | 23035569 | 23037108 | 1540 | CarSat1 | red    | na |
| chrUn | 23037321 | 23037913 | 593  | CarSat1 | red    | na |
| chrUn | 23046465 | 23047164 | 700  | CarSat1 | red    | na |
| chrUn | 23047362 | 23047487 | 126  | CarSat1 | red    | na |
| chrUn | 23047512 | 23047973 | 462  | CarSat1 | red    | na |
| chrUn | 23047990 | 23048704 | 715  | CarSat1 | red    | na |
| chrUn | 23048731 | 23049440 | 710  | CarSat1 | red    | na |
| chrUn | 23049466 | 23050176 | 711  | CarSat1 | red    | na |
| chrUn | 23050203 | 23050913 | 711  | CarSat1 | red    | na |

|       |          |          |              |        |    |
|-------|----------|----------|--------------|--------|----|
| chrUn | 23050940 | 23051650 | 711 CarSat1  | red    | na |
| chrUn | 23051677 | 23052387 | 711 CarSat1  | red    | na |
| chrUn | 23052414 | 23053123 | 710 CarSat1  | red    | na |
| chrUn | 23053150 | 23054112 | 963 CarSat1  | red    | na |
| chrUn | 23054137 | 23055335 | 1199 CarSat1 | red    | na |
| chrUn | 23055362 | 23056071 | 710 CarSat1  | red    | na |
| chrUn | 23056097 | 23057059 | 963 CarSat1  | red    | na |
| chrUn | 23057075 | 23057544 | 470 CarSat1  | red    | na |
| chrUn | 23057571 | 23058534 | 964 CarSat1  | red    | na |
| chrUn | 23058550 | 23059270 | 721 CarSat1  | red    | na |
| chrUn | 23059301 | 23060491 | 1191 CarSat1 | red    | na |
| chrUn | 23060518 | 23063010 | 2493 CarSat1 | red    | na |
| chrUn | 23063573 | 23064173 | 601 CarSat1  | red    | na |
| chrUn | 23064200 | 23065843 | 1644 CarSat1 | red    | na |
| chrUn | 23067472 | 23068101 | 630 CarSat1  | red    | na |
| chrUn | 23068117 | 23069575 | 1459 CarSat1 | red    | na |
| chrUn | 23069591 | 23070308 | 718 CarSat1  | red    | na |
| chrUn | 23070324 | 23070793 | 470 CarSat1  | red    | na |
| chrUn | 23070820 | 23071781 | 962 CarSat1  | red    | na |
| chrUn | 23071797 | 23073740 | 1944 CarSat1 | red    | na |
| chrUn | 23073767 | 23074730 | 964 CarSat1  | red    | na |
| chrUn | 23074746 | 23075215 | 470 CarSat1  | red    | na |
| chrUn | 23075242 | 23076204 | 963 CarSat1  | red    | na |
| chrUn | 23076220 | 23078416 | 2197 CarSat1 | red    | na |
| chrUn | 23078432 | 23079153 | 722 CarSat1  | red    | na |
| chrUn | 23079169 | 23081841 | 2673 CarSat1 | red    | na |
| chrUn | 23081868 | 23083041 | 1174 CarSat1 | red    | na |
| chrUn | 23083249 | 23087601 | 4353 CarSat1 | red    | na |
| chrUn | 23088029 | 23088948 | 920 CarSat1  | red    | na |
| chrUn | 23088962 | 23089089 | 128 Carsat2  | orange | na |
| chrUn | 23088977 | 23089956 | 980 CarSat1  | red    | na |
| chrUn | 23089983 | 23091683 | 1701 CarSat1 | red    | na |
| chrUn | 23091699 | 23094993 | 3295 CarSat1 | red    | na |
| chrUn | 23101505 | 23101821 | 317 Sat2CF   | purple | na |
| chrUn | 23102163 | 23102611 | 449 Sat2CF   | purple | na |
| chrUn | 23102283 | 23102664 | 382 Sat2CF   | purple | na |
| chrUn | 23115414 | 23115648 | 235 Sat2CF   | purple | na |
| chrUn | 23115482 | 23115830 | 349 Sat2CF   | purple | na |
| chrUn | 23142763 | 23143929 | 1167 Sat2CF  | purple | na |
| chrUn | 23180897 | 23182072 | 1176 Sat2CF  | purple | na |
| chrUn | 23223618 | 23223779 | 162 Sat2CF   | purple | na |
| chrUn | 23223644 | 23224753 | 1110 Sat2CF  | purple | na |

|       |          |          |              |        |    |
|-------|----------|----------|--------------|--------|----|
| chrUn | 23242944 | 23243896 | 953 Sat2CF   | purple | na |
| chrUn | 23266630 | 23267368 | 739 Sat2CF   | purple | na |
| chrUn | 23266704 | 23267366 | 663 Sat2CF   | purple | na |
| chrUn | 23301583 | 23302834 | 1252 Sat2CF  | purple | na |
| chrUn | 23301713 | 23302832 | 1120 Sat2CF  | purple | na |
| chrUn | 23357853 | 23359089 | 1237 Sat2CF  | purple | na |
| chrUn | 23372731 | 23373862 | 1132 Sat2CF  | purple | na |
| chrUn | 23372735 | 23374022 | 1288 Sat2CF  | purple | na |
| chrUn | 23389991 | 23391159 | 1169 Sat2CF  | purple | na |
| chrUn | 23391051 | 23391230 | 180 Sat2CF   | purple | na |
| chrUn | 23406450 | 23406830 | 381 Sat2CF   | purple | na |
| chrUn | 23406509 | 23407295 | 787 Sat2CF   | purple | na |
| chrUn | 23417450 | 23417809 | 360 SAT1_CF  | blue   | na |
| chrUn | 23417852 | 23418354 | 503 SAT1_CF  | blue   | na |
| chrUn | 23418367 | 23418969 | 603 SAT1_CF  | blue   | na |
| chrUn | 23418981 | 23419656 | 676 SAT1_CF  | blue   | na |
| chrUn | 23419699 | 23421549 | 1851 SAT1_CF | blue   | na |
| chrUn | 23421578 | 23421735 | 158 SAT1_CF  | blue   | na |
| chrUn | 23421780 | 23422719 | 940 SAT1_CF  | blue   | na |
| chrUn | 23422741 | 23423414 | 674 SAT1_CF  | blue   | na |
| chrUn | 23423438 | 23424981 | 1544 SAT1_CF | blue   | na |
| chrUn | 23424993 | 23425676 | 684 SAT1_CF  | blue   | na |
| chrUn | 23425703 | 23426409 | 707 SAT1_CF  | blue   | na |
| chrUn | 23426432 | 23428788 | 2357 SAT1_CF | blue   | na |
| chrUn | 23428822 | 23429614 | 793 SAT1_CF  | blue   | na |
| chrUn | 23429626 | 23431324 | 1699 SAT1_CF | blue   | na |
| chrUn | 23431366 | 23431556 | 191 SAT1_CF  | blue   | na |
| chrUn | 23431587 | 23432112 | 526 SAT1_CF  | blue   | na |
| chrUn | 23432127 | 23432263 | 137 SAT1_CF  | blue   | na |
| chrUn | 23432329 | 23432831 | 503 SAT1_CF  | blue   | na |
| chrUn | 23432844 | 23432951 | 108 SAT1_CF  | blue   | na |
| chrUn | 23432973 | 23433526 | 554 SAT1_CF  | blue   | na |
| chrUn | 23433538 | 23434300 | 763 SAT1_CF  | blue   | na |
| chrUn | 23434312 | 23435169 | 858 SAT1_CF  | blue   | na |
| chrUn | 23435211 | 23436124 | 914 SAT1_CF  | blue   | na |
| chrUn | 23436441 | 23436942 | 502 SAT1_CF  | blue   | na |
| chrUn | 23436955 | 23437638 | 684 SAT1_CF  | blue   | na |
| chrUn | 23437650 | 23438638 | 989 SAT1_CF  | blue   | na |
| chrUn | 23438654 | 23439177 | 524 SAT1_CF  | blue   | na |
| chrUn | 23439220 | 23439422 | 203 SAT1_CF  | blue   | na |
| chrUn | 23439601 | 23439789 | 189 SAT1_CF  | blue   | na |
| chrUn | 23439845 | 23440404 | 560 SAT1_CF  | blue   | na |

|       |          |          |              |      |    |
|-------|----------|----------|--------------|------|----|
| chrUn | 23440466 | 23441275 | 810 SAT1_CF  | blue | na |
| chrUn | 23441293 | 23443587 | 2295 SAT1_CF | blue | na |
| chrUn | 23443631 | 23444822 | 1192 SAT1_CF | blue | na |
| chrUn | 23444850 | 23444986 | 137 SAT1_CF  | blue | na |
| chrUn | 23445052 | 23445553 | 502 SAT1_CF  | blue | na |
| chrUn | 23445565 | 23445674 | 110 SAT1_CF  | blue | na |
| chrUn | 23445695 | 23446325 | 631 SAT1_CF  | blue | na |
| chrUn | 23446343 | 23447004 | 662 SAT1_CF  | blue | na |
| chrUn | 23447060 | 23447605 | 546 SAT1_CF  | blue | na |
| chrUn | 23447648 | 23448192 | 545 SAT1_CF  | blue | na |
| chrUn | 23448214 | 23449393 | 1180 SAT1_CF | blue | na |
| chrUn | 23449436 | 23449975 | 540 SAT1_CF  | blue | na |
| chrUn | 23449988 | 23451475 | 1488 SAT1_CF | blue | na |
| chrUn | 23451496 | 23452623 | 1128 SAT1_CF | blue | na |
| chrUn | 23452650 | 23453408 | 759 SAT1_CF  | blue | na |
| chrUn | 23453431 | 23454096 | 666 SAT1_CF  | blue | na |
| chrUn | 23454140 | 23456141 | 2002 SAT1_CF | blue | na |
| chrUn | 23456182 | 23456683 | 502 SAT1_CF  | blue | na |
| chrUn | 23456701 | 23457378 | 678 SAT1_CF  | blue | na |
| chrUn | 23457396 | 23458224 | 829 SAT1_CF  | blue | na |
| chrUn | 23458405 | 23458580 | 176 SAT1_CF  | blue | na |
| chrUn | 23458626 | 23459128 | 503 SAT1_CF  | blue | na |
| chrUn | 23459141 | 23459902 | 762 SAT1_CF  | blue | na |
| chrUn | 23459926 | 23461663 | 1738 SAT1_CF | blue | na |
| chrUn | 23461743 | 23461907 | 165 SAT1_CF  | blue | na |
| chrUn | 23462089 | 23462274 | 186 SAT1_CF  | blue | na |
| chrUn | 23462330 | 23462809 | 480 SAT1_CF  | blue | na |
| chrUn | 23462822 | 23462900 | 79 SAT1_CF   | blue | na |
| chrUn | 23462913 | 23463392 | 480 SAT1_CF  | blue | na |
| chrUn | 23463413 | 23463954 | 542 SAT1_CF  | blue | na |
| chrUn | 23464024 | 23465227 | 1204 SAT1_CF | blue | na |
| chrUn | 23465271 | 23465577 | 307 SAT1_CF  | blue | na |
| chrUn | 23465657 | 23466162 | 506 SAT1_CF  | blue | na |
| chrUn | 23466177 | 23467498 | 1322 SAT1_CF | blue | na |
| chrUn | 23467583 | 23469356 | 1774 SAT1_CF | blue | na |
| chrUn | 23469426 | 23469592 | 167 SAT1_CF  | blue | na |
| chrUn | 23469636 | 23470178 | 543 SAT1_CF  | blue | na |
| chrUn | 23470205 | 23471741 | 1537 SAT1_CF | blue | na |
| chrUn | 23471789 | 23472285 | 497 SAT1_CF  | blue | na |
| chrUn | 23472298 | 23473520 | 1223 SAT1_CF | blue | na |
| chrUn | 23473532 | 23474177 | 646 SAT1_CF  | blue | na |
| chrUn | 23476354 | 23477476 | 1123 SAT1_CF | blue | na |

|       |          |          |              |      |    |
|-------|----------|----------|--------------|------|----|
| chrUn | 23477524 | 23478069 | 546 SAT1_CF  | blue | na |
| chrUn | 23478111 | 23478219 | 109 SAT1_CF  | blue | na |
| chrUn | 23478264 | 23479219 | 956 SAT1_CF  | blue | na |
| chrUn | 23479237 | 23479906 | 670 SAT1_CF  | blue | na |
| chrUn | 23479949 | 23481937 | 1989 SAT1_CF | blue | na |
| chrUn | 23482007 | 23482523 | 517 SAT1_CF  | blue | na |
| chrUn | 23482537 | 23482644 | 108 SAT1_CF  | blue | na |
| chrUn | 23482666 | 23483220 | 555 SAT1_CF  | blue | na |
| chrUn | 23483232 | 23483341 | 110 SAT1_CF  | blue | na |
| chrUn | 23483360 | 23483912 | 553 SAT1_CF  | blue | na |
| chrUn | 23483923 | 23484415 | 493 SAT1_CF  | blue | na |
| chrUn | 23484429 | 23485153 | 725 SAT1_CF  | blue | na |
| chrUn | 23485164 | 23485407 | 244 SAT1_CF  | blue | na |
| chrUn | 23485434 | 23486954 | 1521 SAT1_CF | blue | na |
| chrUn | 23486967 | 23489550 | 2584 SAT1_CF | blue | na |
| chrUn | 23489593 | 23490133 | 541 SAT1_CF  | blue | na |
| chrUn | 23490148 | 23491245 | 1098 SAT1_CF | blue | na |
| chrUn | 23491279 | 23493527 | 2249 SAT1_CF | blue | na |
| chrUn | 23493563 | 23494056 | 494 SAT1_CF  | blue | na |
| chrUn | 23494069 | 23494871 | 803 SAT1_CF  | blue | na |
| chrUn | 23494894 | 23495440 | 547 SAT1_CF  | blue | na |
| chrUn | 23495487 | 23496359 | 873 SAT1_CF  | blue | na |
| chrUn | 23496379 | 23497055 | 677 SAT1_CF  | blue | na |
| chrUn | 23497098 | 23498837 | 1740 SAT1_CF | blue | na |
| chrUn | 23498849 | 23499526 | 678 SAT1_CF  | blue | na |
| chrUn | 23499568 | 23500114 | 547 SAT1_CF  | blue | na |
| chrUn | 23500126 | 23501034 | 909 SAT1_CF  | blue | na |
| chrUn | 23501062 | 23501708 | 647 SAT1_CF  | blue | na |
| chrUn | 23501740 | 23502429 | 690 SAT1_CF  | blue | na |
| chrUn | 23502465 | 23502815 | 351 SAT1_CF  | blue | na |
| chrUn | 23502871 | 23503761 | 891 SAT1_CF  | blue | na |
| chrUn | 23503773 | 23503856 | 84 SAT1_CF   | blue | na |
| chrUn | 23503869 | 23504414 | 546 SAT1_CF  | blue | na |
| chrUn | 23504458 | 23505458 | 1001 SAT1_CF | blue | na |
| chrUn | 23505490 | 23506485 | 996 SAT1_CF  | blue | na |
| chrUn | 23506533 | 23507913 | 1381 SAT1_CF | blue | na |
| chrUn | 23507955 | 23508641 | 687 SAT1_CF  | blue | na |
| chrUn | 23508657 | 23510294 | 1638 SAT1_CF | blue | na |
| chrUn | 23510316 | 23510862 | 547 SAT1_CF  | blue | na |
| chrUn | 23510905 | 23511536 | 632 SAT1_CF  | blue | na |
| chrUn | 23511564 | 23512206 | 643 SAT1_CF  | blue | na |
| chrUn | 23512271 | 23514853 | 2583 SAT1_CF | blue | na |

|       |          |          |              |      |    |
|-------|----------|----------|--------------|------|----|
| chrUn | 23514928 | 23515509 | 582 SAT1_CF  | blue | na |
| chrUn | 23515521 | 23516198 | 678 SAT1_CF  | blue | na |
| chrUn | 23516246 | 23516871 | 626 SAT1_CF  | blue | na |
| chrUn | 23516899 | 23518711 | 1813 SAT1_CF | blue | na |
| chrUn | 23518724 | 23518800 | 77 SAT1_CF   | blue | na |
| chrUn | 23518853 | 23519424 | 572 SAT1_CF  | blue | na |
| chrUn | 23519436 | 23520113 | 678 SAT1_CF  | blue | na |
| chrUn | 23520156 | 23521928 | 1773 SAT1_CF | blue | na |
| chrUn | 23522015 | 23522517 | 503 SAT1_CF  | blue | na |
| chrUn | 23522530 | 23523204 | 675 SAT1_CF  | blue | na |
| chrUn | 23523217 | 23523827 | 611 SAT1_CF  | blue | na |
| chrUn | 23523871 | 23524437 | 567 SAT1_CF  | blue | na |
| chrUn | 23524480 | 23524991 | 512 SAT1_CF  | blue | na |
| chrUn | 23525019 | 23525260 | 242 SAT1_CF  | blue | na |
| chrUn | 23525325 | 23525877 | 553 SAT1_CF  | blue | na |
| chrUn | 23525890 | 23527332 | 1443 SAT1_CF | blue | na |
| chrUn | 23527360 | 23527516 | 157 SAT1_CF  | blue | na |
| chrUn | 23527561 | 23528148 | 588 SAT1_CF  | blue | na |
| chrUn | 23528204 | 23528965 | 762 SAT1_CF  | blue | na |
| chrUn | 23528978 | 23530359 | 1382 SAT1_CF | blue | na |
| chrUn | 23530383 | 23530992 | 610 SAT1_CF  | blue | na |
| chrUn | 23531071 | 23532314 | 1244 SAT1_CF | blue | na |
| chrUn | 23533728 | 23534300 | 573 SAT1_CF  | blue | na |
| chrUn | 23534323 | 23535559 | 1237 SAT1_CF | blue | na |
| chrUn | 23535591 | 23536112 | 522 SAT1_CF  | blue | na |
| chrUn | 23536127 | 23536831 | 705 SAT1_CF  | blue | na |
| chrUn | 23536844 | 23536950 | 107 SAT1_CF  | blue | na |
| chrUn | 23536973 | 23538800 | 1828 SAT1_CF | blue | na |
| chrUn | 23538868 | 23539386 | 519 SAT1_CF  | blue | na |
| chrUn | 23539399 | 23540002 | 604 SAT1_CF  | blue | na |
| chrUn | 23540014 | 23540689 | 676 SAT1_CF  | blue | na |
| chrUn | 23540732 | 23542243 | 1512 SAT1_CF | blue | na |
| chrUn | 23543639 | 23544211 | 573 SAT1_CF  | blue | na |
| chrUn | 23544251 | 23544757 | 507 SAT1_CF  | blue | na |
| chrUn | 23544770 | 23544876 | 107 SAT1_CF  | blue | na |
| chrUn | 23544898 | 23545629 | 732 SAT1_CF  | blue | na |
| chrUn | 23545671 | 23547562 | 1892 SAT1_CF | blue | na |
| chrUn | 23547583 | 23548101 | 519 SAT1_CF  | blue | na |
| chrUn | 23548120 | 23548214 | 95 SAT1_CF   | blue | na |
| chrUn | 23548244 | 23549872 | 1629 SAT1_CF | blue | na |
| chrUn | 23549959 | 23550461 | 503 SAT1_CF  | blue | na |
| chrUn | 23550474 | 23551268 | 795 SAT1_CF  | blue | na |

|       |          |          |              |      |    |
|-------|----------|----------|--------------|------|----|
| chrUn | 23551281 | 23551962 | 682 SAT1_CF  | blue | na |
| chrUn | 23551980 | 23553194 | 1215 SAT1_CF | blue | na |
| chrUn | 23553299 | 23556268 | 2970 SAT1_CF | blue | na |
| chrUn | 23556311 | 23556814 | 504 SAT1_CF  | blue | na |
| chrUn | 23556851 | 23556987 | 137 SAT1_CF  | blue | na |
| chrUn | 23557034 | 23557555 | 522 SAT1_CF  | blue | na |
| chrUn | 23557568 | 23558737 | 1170 SAT1_CF | blue | na |
| chrUn | 23558818 | 23559366 | 549 SAT1_CF  | blue | na |
| chrUn | 23559409 | 23559611 | 203 SAT1_CF  | blue | na |
| chrUn | 23559791 | 23559976 | 186 SAT1_CF  | blue | na |
| chrUn | 23560012 | 23560512 | 501 SAT1_CF  | blue | na |
| chrUn | 23560525 | 23563293 | 2769 SAT1_CF | blue | na |
| chrUn | 23563316 | 23565271 | 1956 SAT1_CF | blue | na |
| chrUn | 23565338 | 23566463 | 1126 SAT1_CF | blue | na |
| chrUn | 23566649 | 23566981 | 333 SAT1_CF  | blue | na |
| chrUn | 23567013 | 23567568 | 556 SAT1_CF  | blue | na |
| chrUn | 23567581 | 23568415 | 835 SAT1_CF  | blue | na |
| chrUn | 23568459 | 23569235 | 777 SAT1_CF  | blue | na |
| chrUn | 23569247 | 23569923 | 677 SAT1_CF  | blue | na |
| chrUn | 23570020 | 23570560 | 541 SAT1_CF  | blue | na |
| chrUn | 23570585 | 23570945 | 361 SAT1_CF  | blue | na |
| chrUn | 23570987 | 23571494 | 508 SAT1_CF  | blue | na |
| chrUn | 23571508 | 23571910 | 403 SAT1_CF  | blue | na |
| chrUn | 23571948 | 23572563 | 616 SAT1_CF  | blue | na |
| chrUn | 23572592 | 23573220 | 629 SAT1_CF  | blue | na |
| chrUn | 23573244 | 23574104 | 861 SAT1_CF  | blue | na |
| chrUn | 23574131 | 23574807 | 677 SAT1_CF  | blue | na |
| chrUn | 23574819 | 23575669 | 851 SAT1_CF  | blue | na |
| chrUn | 23575682 | 23576298 | 617 SAT1_CF  | blue | na |
| chrUn | 23576340 | 23577158 | 819 SAT1_CF  | blue | na |
| chrUn | 23577189 | 23577568 | 380 SAT1_CF  | blue | na |
| chrUn | 23577610 | 23578108 | 499 SAT1_CF  | blue | na |
| chrUn | 23578125 | 23578880 | 756 SAT1_CF  | blue | na |
| chrUn | 23578894 | 23579632 | 739 SAT1_CF  | blue | na |
| chrUn | 23579645 | 23580366 | 722 SAT1_CF  | blue | na |
| chrUn | 23580394 | 23580900 | 507 SAT1_CF  | blue | na |
| chrUn | 23580935 | 23581799 | 865 SAT1_CF  | blue | na |
| chrUn | 23581812 | 23582670 | 859 SAT1_CF  | blue | na |
| chrUn | 23582684 | 23583750 | 1067 SAT1_CF | blue | na |
| chrUn | 23583768 | 23585256 | 1489 SAT1_CF | blue | na |
| chrUn | 23585326 | 23585879 | 554 SAT1_CF  | blue | na |
| chrUn | 23585892 | 23586531 | 640 SAT1_CF  | blue | na |

|       |          |          |              |      |    |
|-------|----------|----------|--------------|------|----|
| chrUn | 23586574 | 23588454 | 1881 SAT1_CF | blue | na |
| chrUn | 23588468 | 23588544 | 77 SAT1_CF   | blue | na |
| chrUn | 23588595 | 23589137 | 543 SAT1_CF  | blue | na |
| chrUn | 23589149 | 23590175 | 1027 SAT1_CF | blue | na |
| chrUn | 23590217 | 23591267 | 1051 SAT1_CF | blue | na |
| chrUn | 23591298 | 23591810 | 513 SAT1_CF  | blue | na |
| chrUn | 23591838 | 23592795 | 958 SAT1_CF  | blue | na |
| chrUn | 23592808 | 23593482 | 675 SAT1_CF  | blue | na |
| chrUn | 23593525 | 23594073 | 549 SAT1_CF  | blue | na |
| chrUn | 23594106 | 23594623 | 518 SAT1_CF  | blue | na |
| chrUn | 23594709 | 23595210 | 502 SAT1_CF  | blue | na |
| chrUn | 23595223 | 23595906 | 684 SAT1_CF  | blue | na |
| chrUn | 23595918 | 23596677 | 760 SAT1_CF  | blue | na |
| chrUn | 23596691 | 23597647 | 957 SAT1_CF  | blue | na |
| chrUn | 23597689 | 23598191 | 503 SAT1_CF  | blue | na |
| chrUn | 23598204 | 23598309 | 106 SAT1_CF  | blue | na |
| chrUn | 23598332 | 23599480 | 1149 SAT1_CF | blue | na |
| chrUn | 23599492 | 23602387 | 2896 SAT1_CF | blue | na |
| chrUn | 23602430 | 23602803 | 374 SAT1_CF  | blue | na |
| chrUn | 23602820 | 23603330 | 511 SAT1_CF  | blue | na |
| chrUn | 23603357 | 23604113 | 757 SAT1_CF  | blue | na |
| chrUn | 23604126 | 23605841 | 1716 SAT1_CF | blue | na |
| chrUn | 23605885 | 23607085 | 1201 SAT1_CF | blue | na |
| chrUn | 23607165 | 23607329 | 165 SAT1_CF  | blue | na |
| chrUn | 23607510 | 23607695 | 186 SAT1_CF  | blue | na |
| chrUn | 23607731 | 23608233 | 503 SAT1_CF  | blue | na |
| chrUn | 23608246 | 23609007 | 762 SAT1_CF  | blue | na |
| chrUn | 23609031 | 23609688 | 658 SAT1_CF  | blue | na |
| chrUn | 23609715 | 23610945 | 1231 SAT1_CF | blue | na |
| chrUn | 23610975 | 23613239 | 2265 SAT1_CF | blue | na |
| chrUn | 23613269 | 23613651 | 383 SAT1_CF  | blue | na |
| chrUn | 23613689 | 23614186 | 498 SAT1_CF  | blue | na |
| chrUn | 23614204 | 23614307 | 104 SAT1_CF  | blue | na |
| chrUn | 23614328 | 23614902 | 575 SAT1_CF  | blue | na |
| chrUn | 23614914 | 23615574 | 661 SAT1_CF  | blue | na |
| chrUn | 23615622 | 23616155 | 534 SAT1_CF  | blue | na |
| chrUn | 23616184 | 23616849 | 666 SAT1_CF  | blue | na |
| chrUn | 23616893 | 23618269 | 1377 SAT1_CF | blue | na |
| chrUn | 23618461 | 23619736 | 1276 SAT1_CF | blue | na |
| chrUn | 23619760 | 23620907 | 1148 SAT1_CF | blue | na |
| chrUn | 23620988 | 23621536 | 549 SAT1_CF  | blue | na |
| chrUn | 23621616 | 23621780 | 165 SAT1_CF  | blue | na |



|       |          |          |              |      |    |
|-------|----------|----------|--------------|------|----|
| chrUn | 23621962 | 23622147 | 186 SAT1_CF  | blue | na |
| chrUn | 23622183 | 23622682 | 500 SAT1_CF  | blue | na |
| chrUn | 23622695 | 23623308 | 614 SAT1_CF  | blue | na |
| chrUn | 23623320 | 23624180 | 861 SAT1_CF  | blue | na |
| chrUn | 23624223 | 23625003 | 781 SAT1_CF  | blue | na |
| chrUn | 23625047 | 23625589 | 543 SAT1_CF  | blue | na |
| chrUn | 23625611 | 23626281 | 671 SAT1_CF  | blue | na |
| chrUn | 23626293 | 23627629 | 1337 SAT1_CF | blue | na |
| chrUn | 23627654 | 23628379 | 726 SAT1_CF  | blue | na |
| chrUn | 23628422 | 23628970 | 549 SAT1_CF  | blue | na |
| chrUn | 23628982 | 23629651 | 670 SAT1_CF  | blue | na |
| chrUn | 23629663 | 23630526 | 864 SAT1_CF  | blue | na |
| chrUn | 23630539 | 23631903 | 1365 SAT1_CF | blue | na |
| chrUn | 23631948 | 23632576 | 629 SAT1_CF  | blue | na |
| chrUn | 23632604 | 23633166 | 563 SAT1_CF  | blue | na |
| chrUn | 23633208 | 23633731 | 524 SAT1_CF  | blue | na |
| chrUn | 23633746 | 23633882 | 137 SAT1_CF  | blue | na |
| chrUn | 23633967 | 23634772 | 806 SAT1_CF  | blue | na |
| chrUn | 23634792 | 23635567 | 776 SAT1_CF  | blue | na |
| chrUn | 23635614 | 23636138 | 525 SAT1_CF  | blue | na |
| chrUn | 23636153 | 23636309 | 157 SAT1_CF  | blue | na |
| chrUn | 23636355 | 23636853 | 499 SAT1_CF  | blue | na |
| chrUn | 23636871 | 23636974 | 104 SAT1_CF  | blue | na |
| chrUn | 23636995 | 23637569 | 575 SAT1_CF  | blue | na |
| chrUn | 23637581 | 23638241 | 661 SAT1_CF  | blue | na |
| chrUn | 23638289 | 23638829 | 541 SAT1_CF  | blue | na |
| chrUn | 23638851 | 23639516 | 666 SAT1_CF  | blue | na |
| chrUn | 23639560 | 23640062 | 503 SAT1_CF  | blue | na |
| chrUn | 23640088 | 23640636 | 549 SAT1_CF  | blue | na |
| chrUn | 23640680 | 23642085 | 1406 SAT1_CF | blue | na |
| chrUn | 23642165 | 23642689 | 525 SAT1_CF  | blue | na |
| chrUn | 23642704 | 23643405 | 702 SAT1_CF  | blue | na |
| chrUn | 23643418 | 23643523 | 106 SAT1_CF  | blue | na |
| chrUn | 23643546 | 23645335 | 1790 SAT1_CF | blue | na |
| chrUn | 23645367 | 23645999 | 633 SAT1_CF  | blue | na |
| chrUn | 23646010 | 23646404 | 395 SAT1_CF  | blue | na |
| chrUn | 23646470 | 23646948 | 479 SAT1_CF  | blue | na |
| chrUn | 23646961 | 23647645 | 685 SAT1_CF  | blue | na |
| chrUn | 23647657 | 23648498 | 842 SAT1_CF  | blue | na |
| chrUn | 23648540 | 23649907 | 1368 SAT1_CF | blue | na |
| chrUn | 23649921 | 23651323 | 1403 SAT1_CF | blue | na |
| chrUn | 23651337 | 23651732 | 396 SAT1_CF  | blue | na |

|       |          |          |              |      |    |
|-------|----------|----------|--------------|------|----|
| chrUn | 23651796 | 23653010 | 1215 SAT1_CF | blue | na |
| chrUn | 23653022 | 23653130 | 109 SAT1_CF  | blue | na |
| chrUn | 23653151 | 23653702 | 552 SAT1_CF  | blue | na |
| chrUn | 23653751 | 23654266 | 516 SAT1_CF  | blue | na |
| chrUn | 23654281 | 23655107 | 827 SAT1_CF  | blue | na |
| chrUn | 23655150 | 23655772 | 623 SAT1_CF  | blue | na |
| chrUn | 23655802 | 23657117 | 1316 SAT1_CF | blue | na |
| chrUn | 23657155 | 23657655 | 501 SAT1_CF  | blue | na |
| chrUn | 23657667 | 23658343 | 677 SAT1_CF  | blue | na |
| chrUn | 23658386 | 23659009 | 624 SAT1_CF  | blue | na |
| chrUn | 23659048 | 23659571 | 524 SAT1_CF  | blue | na |
| chrUn | 23659586 | 23659742 | 157 SAT1_CF  | blue | na |
| chrUn | 23659787 | 23660281 | 495 SAT1_CF  | blue | na |
| chrUn | 23660301 | 23660984 | 684 SAT1_CF  | blue | na |
| chrUn | 23660996 | 23661671 | 676 SAT1_CF  | blue | na |
| chrUn | 23661713 | 23662723 | 1011 SAT1_CF | blue | na |
| chrUn | 23662755 | 23663763 | 1009 SAT1_CF | blue | na |
| chrUn | 23663803 | 23664304 | 502 SAT1_CF  | blue | na |
| chrUn | 23664317 | 23664954 | 638 SAT1_CF  | blue | na |
| chrUn | 23664969 | 23665580 | 612 SAT1_CF  | blue | na |
| chrUn | 23665594 | 23665782 | 189 SAT1_CF  | blue | na |
| chrUn | 23665834 | 23666535 | 702 SAT1_CF  | blue | na |
| chrUn | 23666547 | 23666653 | 107 SAT1_CF  | blue | na |
| chrUn | 23666677 | 23667227 | 551 SAT1_CF  | blue | na |
| chrUn | 23667250 | 23668111 | 862 SAT1_CF  | blue | na |
| chrUn | 23668129 | 23668815 | 687 SAT1_CF  | blue | na |
| chrUn | 23668827 | 23669677 | 851 SAT1_CF  | blue | na |
| chrUn | 23669690 | 23670435 | 746 SAT1_CF  | blue | na |
| chrUn | 23670474 | 23671607 | 1134 SAT1_CF | blue | na |
| chrUn | 23671724 | 23672242 | 519 SAT1_CF  | blue | na |
| chrUn | 23672299 | 23672845 | 547 SAT1_CF  | blue | na |
| chrUn | 23672888 | 23673430 | 543 SAT1_CF  | blue | na |
| chrUn | 23673472 | 23673752 | 281 SAT1_CF  | blue | na |
| chrUn | 23673783 | 23674704 | 922 SAT1_CF  | blue | na |
| chrUn | 23674744 | 23675245 | 502 SAT1_CF  | blue | na |
| chrUn | 23675272 | 23676019 | 748 SAT1_CF  | blue | na |
| chrUn | 23676032 | 23677583 | 1552 SAT1_CF | blue | na |
| chrUn | 23677651 | 23677904 | 254 SAT1_CF  | blue | na |
| chrUn | 23677920 | 23679594 | 1675 SAT1_CF | blue | na |
| chrUn | 23679639 | 23680627 | 989 SAT1_CF  | blue | na |
| chrUn | 23680684 | 23681594 | 911 SAT1_CF  | blue | na |
| chrUn | 23681681 | 23682181 | 501 SAT1_CF  | blue | na |

|       |          |          |              |      |    |
|-------|----------|----------|--------------|------|----|
| chrUn | 23682208 | 23682983 | 776 SAT1_CF  | blue | na |
| chrUn | 23684089 | 23684335 | 247 SAT1_CF  | blue | na |
| chrUn | 23684354 | 23684878 | 525 SAT1_CF  | blue | na |
| chrUn | 23684935 | 23686041 | 1107 SAT1_CF | blue | na |
| chrUn | 23686253 | 23686408 | 156 SAT1_CF  | blue | na |
| chrUn | 23686453 | 23686952 | 500 SAT1_CF  | blue | na |
| chrUn | 23686965 | 23687647 | 683 SAT1_CF  | blue | na |
| chrUn | 23687690 | 23688236 | 547 SAT1_CF  | blue | na |
| chrUn | 23688278 | 23688945 | 668 SAT1_CF  | blue | na |
| chrUn | 23688976 | 23690099 | 1124 SAT1_CF | blue | na |
| chrUn | 23690120 | 23690640 | 521 SAT1_CF  | blue | na |
| chrUn | 23690652 | 23690902 | 251 SAT1_CF  | blue | na |
| chrUn | 23692395 | 23692820 | 426 SAT1_CF  | blue | na |
| chrUn | 23692899 | 23693423 | 525 SAT1_CF  | blue | na |
| chrUn | 23693438 | 23693595 | 158 SAT1_CF  | blue | na |
| chrUn | 23693640 | 23694135 | 496 SAT1_CF  | blue | na |
| chrUn | 23694155 | 23696047 | 1893 SAT1_CF | blue | na |
| chrUn | 23696061 | 23697038 | 978 SAT1_CF  | blue | na |
| chrUn | 23697103 | 23697658 | 556 SAT1_CF  | blue | na |
| chrUn | 23697670 | 23698532 | 863 SAT1_CF  | blue | na |
| chrUn | 23698609 | 23699485 | 877 SAT1_CF  | blue | na |
| chrUn | 23699506 | 23700062 | 557 SAT1_CF  | blue | na |
| chrUn | 23700073 | 23700181 | 109 SAT1_CF  | blue | na |
| chrUn | 23700207 | 23700727 | 521 SAT1_CF  | blue | na |
| chrUn | 23700740 | 23701346 | 607 SAT1_CF  | blue | na |
| chrUn | 23701358 | 23702033 | 676 SAT1_CF  | blue | na |
| chrUn | 23702049 | 23702732 | 684 SAT1_CF  | blue | na |
| chrUn | 23702771 | 23702916 | 146 SAT1_CF  | blue | na |
| chrUn | 23702941 | 23703384 | 444 SAT1_CF  | blue | na |
| chrUn | 23703420 | 23703975 | 556 SAT1_CF  | blue | na |
| chrUn | 23703987 | 23704661 | 675 SAT1_CF  | blue | na |
| chrUn | 23704705 | 23705665 | 961 SAT1_CF  | blue | na |
| chrUn | 23705745 | 23706659 | 915 SAT1_CF  | blue | na |
| chrUn | 23706746 | 23707247 | 502 SAT1_CF  | blue | na |
| chrUn | 23707259 | 23707364 | 106 SAT1_CF  | blue | na |
| chrUn | 23707388 | 23708190 | 803 SAT1_CF  | blue | na |
| chrUn | 23708202 | 23708311 | 110 SAT1_CF  | blue | na |
| chrUn | 23708332 | 23709003 | 672 SAT1_CF  | blue | na |
| chrUn | 23709025 | 23709567 | 543 SAT1_CF  | blue | na |
| chrUn | 23709611 | 23710154 | 544 SAT1_CF  | blue | na |
| chrUn | 23710167 | 23710858 | 692 SAT1_CF  | blue | na |
| chrUn | 23710870 | 23711720 | 851 SAT1_CF  | blue | na |

|       |          |          |              |      |    |
|-------|----------|----------|--------------|------|----|
| chrUn | 23711733 | 23712349 | 617 SAT1_CF  | blue | na |
| chrUn | 23712391 | 23713214 | 824 SAT1_CF  | blue | na |
| chrUn | 23713259 | 23713623 | 365 SAT1_CF  | blue | na |
| chrUn | 23713695 | 23714214 | 520 SAT1_CF  | blue | na |
| chrUn | 23714271 | 23714817 | 547 SAT1_CF  | blue | na |
| chrUn | 23714859 | 23716165 | 1307 SAT1_CF | blue | na |
| chrUn | 23716187 | 23716705 | 519 SAT1_CF  | blue | na |
| chrUn | 23716717 | 23718034 | 1318 SAT1_CF | blue | na |
| chrUn | 23718047 | 23718882 | 836 SAT1_CF  | blue | na |
| chrUn | 23718895 | 23719598 | 704 SAT1_CF  | blue | na |
| chrUn | 23719610 | 23721734 | 2125 SAT1_CF | blue | na |
| chrUn | 23721767 | 23722146 | 380 SAT1_CF  | blue | na |
| chrUn | 23722186 | 23723924 | 1739 SAT1_CF | blue | na |
| chrUn | 23723985 | 23724146 | 162 SAT1_CF  | blue | na |
| chrUn | 23724207 | 23724718 | 512 SAT1_CF  | blue | na |
| chrUn | 23724746 | 23724888 | 143 SAT1_CF  | blue | na |
| chrUn | 23724948 | 23725448 | 501 SAT1_CF  | blue | na |
| chrUn | 23725461 | 23726215 | 755 SAT1_CF  | blue | na |
| chrUn | 23726235 | 23728047 | 1813 SAT1_CF | blue | na |
| chrUn | 23728060 | 23728462 | 403 SAT1_CF  | blue | na |
| chrUn | 23728502 | 23729004 | 503 SAT1_CF  | blue | na |
| chrUn | 23729017 | 23730895 | 1879 SAT1_CF | blue | na |
| chrUn | 23731012 | 23731575 | 564 SAT1_CF  | blue | na |
| chrUn | 23731617 | 23732396 | 780 SAT1_CF  | blue | na |
| chrUn | 23732440 | 23732984 | 545 SAT1_CF  | blue | na |
| chrUn | 23732997 | 23733506 | 510 SAT1_CF  | blue | na |
| chrUn | 23733519 | 23733590 | 72 SAT1_CF   | blue | na |
| chrUn | 23733613 | 23734764 | 1152 SAT1_CF | blue | na |
| chrUn | 23734794 | 23735353 | 560 SAT1_CF  | blue | na |
| chrUn | 23735440 | 23735940 | 501 SAT1_CF  | blue | na |
| chrUn | 23735958 | 23736712 | 755 SAT1_CF  | blue | na |
| chrUn | 23736724 | 23738058 | 1335 SAT1_CF | blue | na |
| chrUn | 23738083 | 23738405 | 323 SAT1_CF  | blue | na |
| chrUn | 23738485 | 23739007 | 523 SAT1_CF  | blue | na |
| chrUn | 23739223 | 23739377 | 155 SAT1_CF  | blue | na |
| chrUn | 23739403 | 23740619 | 1217 SAT1_CF | blue | na |
| chrUn | 23740631 | 23742395 | 1765 SAT1_CF | blue | na |
| chrUn | 23742447 | 23743065 | 619 SAT1_CF  | blue | na |
| chrUn | 23743114 | 23743741 | 628 SAT1_CF  | blue | na |
| chrUn | 23743753 | 23744623 | 871 SAT1_CF  | blue | na |
| chrUn | 23744641 | 23745327 | 687 SAT1_CF  | blue | na |
| chrUn | 23745339 | 23746189 | 851 SAT1_CF  | blue | na |

|       |          |          |      |         |      |    |
|-------|----------|----------|------|---------|------|----|
| chrUn | 23746202 | 23747683 | 1482 | SAT1_CF | blue | na |
| chrUn | 23747728 | 23748152 | 425  | SAT1_CF | blue | na |
| chrUn | 23748164 | 23748683 | 520  | SAT1_CF | blue | na |
| chrUn | 23748740 | 23749286 | 547  | SAT1_CF | blue | na |
| chrUn | 23749328 | 23750174 | 847  | SAT1_CF | blue | na |
| chrUn | 23750207 | 23751094 | 888  | SAT1_CF | blue | na |
| chrUn | 23751181 | 23751675 | 495  | SAT1_CF | blue | na |
| chrUn | 23751700 | 23751807 | 108  | SAT1_CF | blue | na |
| chrUn | 23751824 | 23752540 | 717  | SAT1_CF | blue | na |
| chrUn | 23752563 | 23753080 | 518  | SAT1_CF | blue | na |
| chrUn | 23753113 | 23753880 | 768  | SAT1_CF | blue | na |
| chrUn | 23753957 | 23755727 | 1771 | SAT1_CF | blue | na |
| chrUn | 23755814 | 23756311 | 498  | SAT1_CF | blue | na |
| chrUn | 23756329 | 23756431 | 103  | SAT1_CF | blue | na |
| chrUn | 23756452 | 23757007 | 556  | SAT1_CF | blue | na |
| chrUn | 23757020 | 23758292 | 1273 | SAT1_CF | blue | na |
| chrUn | 23758377 | 23758879 | 503  | SAT1_CF | blue | na |
| chrUn | 23758892 | 23758998 | 107  | SAT1_CF | blue | na |
| chrUn | 23759020 | 23759565 | 546  | SAT1_CF | blue | na |
| chrUn | 23759635 | 23760098 | 464  | SAT1_CF | blue | na |
| chrUn | 23760110 | 23761625 | 1516 | SAT1_CF | blue | na |
| chrUn | 23761637 | 23762606 | 970  | SAT1_CF | blue | na |
| chrUn | 23762659 | 23764267 | 1609 | SAT1_CF | blue | na |
| chrUn | 23764300 | 23764458 | 159  | SAT1_CF | blue | na |
| chrUn | 23764483 | 23765003 | 521  | SAT1_CF | blue | na |
| chrUn | 23765021 | 23766413 | 1393 | SAT1_CF | blue | na |
| chrUn | 23766480 | 23767549 | 1070 | SAT1_CF | blue | na |
| chrUn | 23767561 | 23768450 | 890  | SAT1_CF | blue | na |
| chrUn | 23768464 | 23769832 | 1369 | SAT1_CF | blue | na |
| chrUn | 23769878 | 23770396 | 519  | SAT1_CF | blue | na |
| chrUn | 23770435 | 23770580 | 146  | SAT1_CF | blue | na |
| chrUn | 23770640 | 23771189 | 550  | SAT1_CF | blue | na |
| chrUn | 23771232 | 23771602 | 371  | SAT1_CF | blue | na |
| chrUn | 23771659 | 23772138 | 480  | SAT1_CF | blue | na |
| chrUn | 23772150 | 23772833 | 684  | SAT1_CF | blue | na |
| chrUn | 23772845 | 23774799 | 1955 | SAT1_CF | blue | na |
| chrUn | 23774843 | 23775635 | 793  | SAT1_CF | blue | na |
| chrUn | 23775816 | 23775983 | 168  | SAT1_CF | blue | na |
| chrUn | 23776057 | 23776527 | 471  | SAT1_CF | blue | na |
| chrUn | 23776550 | 23777874 | 1325 | SAT1_CF | blue | na |
| chrUn | 23777889 | 23778046 | 158  | SAT1_CF | blue | na |
| chrUn | 23778072 | 23779991 | 1920 | SAT1_CF | blue | na |

|       |          |          |      |         |      |    |
|-------|----------|----------|------|---------|------|----|
| chrUn | 23780019 | 23781236 | 1218 | SAT1_CF | blue | na |
| chrUn | 23781418 | 23781599 | 182  | SAT1_CF | blue | na |
| chrUn | 23781659 | 23782132 | 474  | SAT1_CF | blue | na |
| chrUn | 23782145 | 23782250 | 106  | SAT1_CF | blue | na |
| chrUn | 23782274 | 23783332 | 1059 | SAT1_CF | blue | na |
| chrUn | 23783345 | 23783846 | 502  | SAT1_CF | blue | na |
| chrUn | 23783864 | 23784804 | 941  | SAT1_CF | blue | na |
| chrUn | 23784825 | 23785344 | 520  | SAT1_CF | blue | na |
| chrUn | 23785355 | 23785710 | 356  | SAT1_CF | blue | na |
| chrUn | 23785797 | 23786885 | 1089 | SAT1_CF | blue | na |
| chrUn | 23786903 | 23787572 | 670  | SAT1_CF | blue | na |
| chrUn | 23787615 | 23788577 | 963  | SAT1_CF | blue | na |
| chrUn | 23788655 | 23789163 | 509  | SAT1_CF | blue | na |
| chrUn | 23789246 | 23789827 | 582  | SAT1_CF | blue | na |
| chrUn | 23789849 | 23790600 | 752  | SAT1_CF | blue | na |
| chrUn | 23790613 | 23791229 | 617  | SAT1_CF | blue | na |
| chrUn | 23791442 | 23791597 | 156  | SAT1_CF | blue | na |
| chrUn | 23791623 | 23792141 | 519  | SAT1_CF | blue | na |
| chrUn | 23792159 | 23792842 | 684  | SAT1_CF | blue | na |
| chrUn | 23792886 | 23794184 | 1299 | SAT1_CF | blue | na |
| chrUn | 23794264 | 23794788 | 525  | SAT1_CF | blue | na |
| chrUn | 23794803 | 23794960 | 158  | SAT1_CF | blue | na |
| chrUn | 23795025 | 23795956 | 932  | SAT1_CF | blue | na |
| chrUn | 23795969 | 23796641 | 673  | SAT1_CF | blue | na |
| chrUn | 23796653 | 23796820 | 168  | SAT1_CF | blue | na |
| chrUn | 23796833 | 23796873 | 41   | SAT1_CF | blue | na |
| chrUn | 23796905 | 23797984 | 1080 | SAT1_CF | blue | na |
| chrUn | 23798027 | 23798581 | 555  | SAT1_CF | blue | na |
| chrUn | 23798593 | 23799855 | 1263 | SAT1_CF | blue | na |
| chrUn | 23799889 | 23800408 | 520  | SAT1_CF | blue | na |
| chrUn | 23800420 | 23801106 | 687  | SAT1_CF | blue | na |
| chrUn | 23801118 | 23801226 | 109  | SAT1_CF | blue | na |
| chrUn | 23801246 | 23803494 | 2249 | SAT1_CF | blue | na |
| chrUn | 23803507 | 23804189 | 683  | SAT1_CF | blue | na |
| chrUn | 23804213 | 23805899 | 1687 | SAT1_CF | blue | na |
| chrUn | 23805944 | 23806973 | 1030 | SAT1_CF | blue | na |
| chrUn | 23807033 | 23807603 | 571  | SAT1_CF | blue | na |
| chrUn | 23807622 | 23809111 | 1490 | SAT1_CF | blue | na |
| chrUn | 23809190 | 23810432 | 1243 | SAT1_CF | blue | na |
| chrUn | 23810476 | 23811698 | 1223 | SAT1_CF | blue | na |
| chrUn | 23811725 | 23812288 | 564  | SAT1_CF | blue | na |
| chrUn | 23812368 | 23813955 | 1588 | SAT1_CF | blue | na |

|       |          |          |              |      |    |
|-------|----------|----------|--------------|------|----|
| chrUn | 23813967 | 23815126 | 1160 SAT1_CF | blue | na |
| chrUn | 23815207 | 23815755 | 549 SAT1_CF  | blue | na |
| chrUn | 23815835 | 23816000 | 166 SAT1_CF  | blue | na |
| chrUn | 23816181 | 23816366 | 186 SAT1_CF  | blue | na |
| chrUn | 23816383 | 23816902 | 520 SAT1_CF  | blue | na |
| chrUn | 23816915 | 23817020 | 106 SAT1_CF  | blue | na |
| chrUn | 23817043 | 23818191 | 1149 SAT1_CF | blue | na |
| chrUn | 23818223 | 23818739 | 517 SAT1_CF  | blue | na |
| chrUn | 23818752 | 23820123 | 1372 SAT1_CF | blue | na |
| chrUn | 23820135 | 23820307 | 173 SAT1_CF  | blue | na |
| chrUn | 23820349 | 23821156 | 808 SAT1_CF  | blue | na |
| chrUn | 23821200 | 23821721 | 522 SAT1_CF  | blue | na |
| chrUn | 23821754 | 23821966 | 213 SAT1_CF  | blue | na |
| chrUn | 23822145 | 23822312 | 168 SAT1_CF  | blue | na |
| chrUn | 23822386 | 23822857 | 472 SAT1_CF  | blue | na |
| chrUn | 23822880 | 23824203 | 1324 SAT1_CF | blue | na |
| chrUn | 23824218 | 23824375 | 158 SAT1_CF  | blue | na |
| chrUn | 23824401 | 23825795 | 1395 SAT1_CF | blue | na |
| chrUn | 23825873 | 23826654 | 782 SAT1_CF  | blue | na |
| chrUn | 23826709 | 23827276 | 568 SAT1_CF  | blue | na |
| chrUn | 23827292 | 23827677 | 386 SAT1_CF  | blue | na |
| chrUn | 23827711 | 23828230 | 520 SAT1_CF  | blue | na |
| chrUn | 23828242 | 23828918 | 677 SAT1_CF  | blue | na |
| chrUn | 23828962 | 23830184 | 1223 SAT1_CF | blue | na |
| chrUn | 23830264 | 23830774 | 511 SAT1_CF  | blue | na |
| chrUn | 23830802 | 23831431 | 630 SAT1_CF  | blue | na |
| chrUn | 23831443 | 23832117 | 675 SAT1_CF  | blue | na |
| chrUn | 23832160 | 23834023 | 1864 SAT1_CF | blue | na |
| chrUn | 23834038 | 23834743 | 706 SAT1_CF  | blue | na |
| chrUn | 23834779 | 23835433 | 655 SAT1_CF  | blue | na |
| chrUn | 23835453 | 23836824 | 1372 SAT1_CF | blue | na |
| chrUn | 23836866 | 23837405 | 540 SAT1_CF  | blue | na |
| chrUn | 23837450 | 23839864 | 2415 SAT1_CF | blue | na |
| chrUn | 23839878 | 23839985 | 108 SAT1_CF  | blue | na |
| chrUn | 23840007 | 23840287 | 281 SAT1_CF  | blue | na |
| chrUn | 23840471 | 23840753 | 283 SAT1_CF  | blue | na |
| chrUn | 23840796 | 23841701 | 906 SAT1_CF  | blue | na |
| chrUn | 23841754 | 23842256 | 503 SAT1_CF  | blue | na |
| chrUn | 23842280 | 23842942 | 663 SAT1_CF  | blue | na |
| chrUn | 23842985 | 23843711 | 727 SAT1_CF  | blue | na |
| chrUn | 23843756 | 23844291 | 536 SAT1_CF  | blue | na |
| chrUn | 23844313 | 23844830 | 518 SAT1_CF  | blue | na |

|       |          |          |              |      |    |
|-------|----------|----------|--------------|------|----|
| chrUn | 23844842 | 23846159 | 1318 SAT1_CF | blue | na |
| chrUn | 23846172 | 23846360 | 189 SAT1_CF  | blue | na |
| chrUn | 23846463 | 23847007 | 545 SAT1_CF  | blue | na |
| chrUn | 23847020 | 23847722 | 703 SAT1_CF  | blue | na |
| chrUn | 23847734 | 23849678 | 1945 SAT1_CF | blue | na |
| chrUn | 23849709 | 23850226 | 518 SAT1_CF  | blue | na |
| chrUn | 23850313 | 23850814 | 502 SAT1_CF  | blue | na |
| chrUn | 23850827 | 23852050 | 1224 SAT1_CF | blue | na |
| chrUn | 23852111 | 23852272 | 162 SAT1_CF  | blue | na |
| chrUn | 23852333 | 23852843 | 511 SAT1_CF  | blue | na |
| chrUn | 23852871 | 23853026 | 156 SAT1_CF  | blue | na |
| chrUn | 23853072 | 23853574 | 503 SAT1_CF  | blue | na |
| chrUn | 23853586 | 23855069 | 1484 SAT1_CF | blue | na |
| chrUn | 23855148 | 23855672 | 525 SAT1_CF  | blue | na |
| chrUn | 23855687 | 23856390 | 704 SAT1_CF  | blue | na |
| chrUn | 23856403 | 23857012 | 610 SAT1_CF  | blue | na |
| chrUn | 23857030 | 23857882 | 853 SAT1_CF  | blue | na |
| chrUn | 23857924 | 23859733 | 1810 SAT1_CF | blue | na |
| chrUn | 23859801 | 23860321 | 521 SAT1_CF  | blue | na |
| chrUn | 23860333 | 23860449 | 117 SAT1_CF  | blue | na |
| chrUn | 23860463 | 23861173 | 711 SAT1_CF  | blue | na |
| chrUn | 23861185 | 23862773 | 1589 SAT1_CF | blue | na |
| chrUn | 23862804 | 23863313 | 510 SAT1_CF  | blue | na |
| chrUn | 23863324 | 23863723 | 400 SAT1_CF  | blue | na |
| chrUn | 23863766 | 23864266 | 501 SAT1_CF  | blue | na |
| chrUn | 23864279 | 23865720 | 1442 SAT1_CF | blue | na |
| chrUn | 23865788 | 23866307 | 520 SAT1_CF  | blue | na |
| chrUn | 23866320 | 23867003 | 684 SAT1_CF  | blue | na |
| chrUn | 23867015 | 23867677 | 663 SAT1_CF  | blue | na |
| chrUn | 23867720 | 23868347 | 628 SAT1_CF  | blue | na |
| chrUn | 23868375 | 23869567 | 1193 SAT1_CF | blue | na |
| chrUn | 23869595 | 23870294 | 700 SAT1_CF  | blue | na |
| chrUn | 23870307 | 23870989 | 683 SAT1_CF  | blue | na |
| chrUn | 23871000 | 23871685 | 686 SAT1_CF  | blue | na |
| chrUn | 23871697 | 23874379 | 2683 SAT1_CF | blue | na |
| chrUn | 23874488 | 23874987 | 500 SAT1_CF  | blue | na |
| chrUn | 23875005 | 23875673 | 669 SAT1_CF  | blue | na |
| chrUn | 23875744 | 23876207 | 464 SAT1_CF  | blue | na |
| chrUn | 23876219 | 23877157 | 939 SAT1_CF  | blue | na |
| chrUn | 23877178 | 23877733 | 556 SAT1_CF  | blue | na |
| chrUn | 23877745 | 23878567 | 823 SAT1_CF  | blue | na |
| chrUn | 23878579 | 23879202 | 624 SAT1_CF  | blue | na |



|       |          |          |              |      |    |
|-------|----------|----------|--------------|------|----|
| chrUn | 23879230 | 23880393 | 1164 SAT1_CF | blue | na |
| chrUn | 23880445 | 23880581 | 137 SAT1_CF  | blue | na |
| chrUn | 23880647 | 23881140 | 494 SAT1_CF  | blue | na |
| chrUn | 23881174 | 23881800 | 627 SAT1_CF  | blue | na |
| chrUn | 23882061 | 23882760 | 700 SAT1_CF  | blue | na |
| chrUn | 23882774 | 23883283 | 510 SAT1_CF  | blue | na |
| chrUn | 23883296 | 23883397 | 102 SAT1_CF  | blue | na |
| chrUn | 23883425 | 23883980 | 556 SAT1_CF  | blue | na |
| chrUn | 23883991 | 23884483 | 493 SAT1_CF  | blue | na |
| chrUn | 23884497 | 23885878 | 1382 SAT1_CF | blue | na |
| chrUn | 23885906 | 23886469 | 564 SAT1_CF  | blue | na |
| chrUn | 23886549 | 23887073 | 525 SAT1_CF  | blue | na |
| chrUn | 23887088 | 23887244 | 157 SAT1_CF  | blue | na |
| chrUn | 23887289 | 23887879 | 591 SAT1_CF  | blue | na |
| chrUn | 23887897 | 23888289 | 393 SAT1_CF  | blue | na |
| chrUn | 23889688 | 23890264 | 577 SAT1_CF  | blue | na |
| chrUn | 23890323 | 23890805 | 483 SAT1_CF  | blue | na |
| chrUn | 23890818 | 23892153 | 1336 SAT1_CF | blue | na |
| chrUn | 23892197 | 23892621 | 425 SAT1_CF  | blue | na |
| chrUn | 23892639 | 23893525 | 887 SAT1_CF  | blue | na |
| chrUn | 23893595 | 23894113 | 519 SAT1_CF  | blue | na |
| chrUn | 23894141 | 23895503 | 1363 SAT1_CF | blue | na |
| chrUn | 23895531 | 23896549 | 1019 SAT1_CF | blue | na |
| chrUn | 23896614 | 23897175 | 562 SAT1_CF  | blue | na |
| chrUn | 23898587 | 23899264 | 678 SAT1_CF  | blue | na |
| chrUn | 23899308 | 23900446 | 1139 SAT1_CF | blue | na |
| chrUn | 23900512 | 23901011 | 500 SAT1_CF  | blue | na |
| chrUn | 23901023 | 23901131 | 109 SAT1_CF  | blue | na |
| chrUn | 23901154 | 23901709 | 556 SAT1_CF  | blue | na |
| chrUn | 23901721 | 23901830 | 110 SAT1_CF  | blue | na |
| chrUn | 23901850 | 23902111 | 262 SAT1_CF  | blue | na |
| chrUn | 23902606 | 23903525 | 920 SAT1_CF  | blue | na |
| chrUn | 23903561 | 23904071 | 511 SAT1_CF  | blue | na |
| chrUn | 23904103 | 23904483 | 381 SAT1_CF  | blue | na |
| chrUn | 23904524 | 23905025 | 502 SAT1_CF  | blue | na |
| chrUn | 23905038 | 23906229 | 1192 SAT1_CF | blue | na |
| chrUn | 23906241 | 23908273 | 2033 SAT1_CF | blue | na |
| chrUn | 23908455 | 23908636 | 182 SAT1_CF  | blue | na |
| chrUn | 23908676 | 23909255 | 580 SAT1_CF  | blue | na |
| chrUn | 23909317 | 23910588 | 1272 SAT1_CF | blue | na |
| chrUn | 23910603 | 23910745 | 143 SAT1_CF  | blue | na |
| chrUn | 23910805 | 23911382 | 578 SAT1_CF  | blue | na |

|       |          |          |              |      |    |
|-------|----------|----------|--------------|------|----|
| chrUn | 23911404 | 23911502 | 99 SAT1_CF   | blue | na |
| chrUn | 23911523 | 23912076 | 554 SAT1_CF  | blue | na |
| chrUn | 23912088 | 23912949 | 862 SAT1_CF  | blue | na |
| chrUn | 23912991 | 23913621 | 631 SAT1_CF  | blue | na |
| chrUn | 23913649 | 23914907 | 1259 SAT1_CF | blue | na |
| chrUn | 23914925 | 23915611 | 687 SAT1_CF  | blue | na |
| chrUn | 23915623 | 23916472 | 850 SAT1_CF  | blue | na |
| chrUn | 23916522 | 23918312 | 1791 SAT1_CF | blue | na |
| chrUn | 23918348 | 23918848 | 501 SAT1_CF  | blue | na |
| chrUn | 23918861 | 23918968 | 108 SAT1_CF  | blue | na |
| chrUn | 23918990 | 23919544 | 555 SAT1_CF  | blue | na |
| chrUn | 23919556 | 23920859 | 1304 SAT1_CF | blue | na |
| chrUn | 23920871 | 23921035 | 165 SAT1_CF  | blue | na |
| chrUn | 23921083 | 23921864 | 782 SAT1_CF  | blue | na |
| chrUn | 23921930 | 23922453 | 524 SAT1_CF  | blue | na |
| chrUn | 23922500 | 23922902 | 403 SAT1_CF  | blue | na |
| chrUn | 23922942 | 23923910 | 969 SAT1_CF  | blue | na |
| chrUn | 23923922 | 23924606 | 685 SAT1_CF  | blue | na |
| chrUn | 23924619 | 23925451 | 833 SAT1_CF  | blue | na |
| chrUn | 23926494 | 23927001 | 508 SAT1_CF  | blue | na |
| chrUn | 23927019 | 23927781 | 763 SAT1_CF  | blue | na |
| chrUn | 23927793 | 23928467 | 675 SAT1_CF  | blue | na |
| chrUn | 23928510 | 23930537 | 2028 SAT1_CF | blue | na |
| chrUn | 23930590 | 23931092 | 503 SAT1_CF  | blue | na |
| chrUn | 23931109 | 23931187 | 79 SAT1_CF   | blue | na |
| chrUn | 23931234 | 23933134 | 1901 SAT1_CF | blue | na |
| chrUn | 23933158 | 23933400 | 243 SAT1_CF  | blue | na |
| chrUn | 23933451 | 23934000 | 550 SAT1_CF  | blue | na |
| chrUn | 23934011 | 23934086 | 76 SAT1_CF   | blue | na |
| chrUn | 23934142 | 23934687 | 546 SAT1_CF  | blue | na |
| chrUn | 23934699 | 23935783 | 1085 SAT1_CF | blue | na |
| chrUn | 23935838 | 23936340 | 503 SAT1_CF  | blue | na |
| chrUn | 23936353 | 23937233 | 881 SAT1_CF  | blue | na |
| chrUn | 23937414 | 23937621 | 208 SAT1_CF  | blue | na |
| chrUn | 23937634 | 23938134 | 501 SAT1_CF  | blue | na |
| chrUn | 23938147 | 23939288 | 1142 SAT1_CF | blue | na |
| chrUn | 23939310 | 23941522 | 2213 SAT1_CF | blue | na |
| chrUn | 23941535 | 23941932 | 398 SAT1_CF  | blue | na |
| chrUn | 23941953 | 23942474 | 522 SAT1_CF  | blue | na |
| chrUn | 23942487 | 23944834 | 2348 SAT1_CF | blue | na |
| chrUn | 23944913 | 23945461 | 549 SAT1_CF  | blue | na |
| chrUn | 23945473 | 23945873 | 401 SAT1_CF  | blue | na |

|       |          |          |      |         |      |    |
|-------|----------|----------|------|---------|------|----|
| chrUn | 23945892 | 23946410 | 519  | SAT1_CF | blue | na |
| chrUn | 23946423 | 23947112 | 690  | SAT1_CF | blue | na |
| chrUn | 23947124 | 23947950 | 827  | SAT1_CF | blue | na |
| chrUn | 23947963 | 23948822 | 860  | SAT1_CF | blue | na |
| chrUn | 23948864 | 23949405 | 542  | SAT1_CF | blue | na |
| chrUn | 23949417 | 23950685 | 1269 | SAT1_CF | blue | na |
| chrUn | 23950696 | 23951051 | 356  | SAT1_CF | blue | na |
| chrUn | 23951168 | 23951710 | 543  | SAT1_CF | blue | na |
| chrUn | 23951722 | 23952406 | 685  | SAT1_CF | blue | na |
| chrUn | 23952418 | 23953102 | 685  | SAT1_CF | blue | na |
| chrUn | 23953115 | 23953954 | 840  | SAT1_CF | blue | na |
| chrUn | 23953967 | 23955154 | 1188 | SAT1_CF | blue | na |
| chrUn | 23955166 | 23956325 | 1160 | SAT1_CF | blue | na |
| chrUn | 23956345 | 23956952 | 608  | SAT1_CF | blue | na |
| chrUn | 23957032 | 23957196 | 165  | SAT1_CF | blue | na |
| chrUn | 23957378 | 23957562 | 185  | SAT1_CF | blue | na |
| chrUn | 23957598 | 23958165 | 568  | SAT1_CF | blue | na |
| chrUn | 23958227 | 23959529 | 1303 | SAT1_CF | blue | na |
| chrUn | 23959541 | 23960403 | 863  | SAT1_CF | blue | na |
| chrUn | 23960445 | 23961076 | 632  | SAT1_CF | blue | na |
| chrUn | 23961104 | 23961593 | 490  | SAT1_CF | blue | na |
| chrUn | 23961604 | 23962108 | 505  | SAT1_CF | blue | na |
| chrUn | 23962142 | 23962491 | 350  | SAT1_CF | blue | na |
| chrUn | 23962547 | 23963047 | 501  | SAT1_CF | blue | na |
| chrUn | 23963061 | 23964389 | 1329 | SAT1_CF | blue | na |
| chrUn | 23964549 | 23964689 | 141  | SAT1_CF | blue | na |
| chrUn | 23964710 | 23965244 | 535  | SAT1_CF | blue | na |
| chrUn | 23965255 | 23965743 | 489  | SAT1_CF | blue | na |
| chrUn | 23965811 | 23966438 | 628  | SAT1_CF | blue | na |
| chrUn | 23968110 | 23968312 | 203  | SAT1_CF | blue | na |
| chrUn | 23968525 | 23968682 | 158  | SAT1_CF | blue | na |
| chrUn | 23968727 | 23969343 | 617  | SAT1_CF | blue | na |
| chrUn | 23969368 | 23969914 | 547  | SAT1_CF | blue | na |
| chrUn | 23969957 | 23971820 | 1864 | SAT1_CF | blue | na |
| chrUn | 23971835 | 23972693 | 859  | SAT1_CF | blue | na |
| chrUn | 23972705 | 23972818 | 114  | SAT1_CF | blue | na |
| chrUn | 23972835 | 23974401 | 1567 | SAT1_CF | blue | na |
| chrUn | 23974422 | 23975679 | 1258 | SAT1_CF | blue | na |
| chrUn | 23975702 | 23976919 | 1218 | SAT1_CF | blue | na |
| chrUn | 23976947 | 23977511 | 565  | SAT1_CF | blue | na |
| chrUn | 23977559 | 23978061 | 503  | SAT1_CF | blue | na |
| chrUn | 23978074 | 23978149 | 76   | SAT1_CF | blue | na |

|       |          |          |              |      |    |
|-------|----------|----------|--------------|------|----|
| chrUn | 23978168 | 23978722 | 555 SAT1_CF  | blue | na |
| chrUn | 23978735 | 23979377 | 643 SAT1_CF  | blue | na |
| chrUn | 23979420 | 23979958 | 539 SAT1_CF  | blue | na |
| chrUn | 23979971 | 23981251 | 1281 SAT1_CF | blue | na |
| chrUn | 23981338 | 23981840 | 503 SAT1_CF  | blue | na |
| chrUn | 23981852 | 23981957 | 106 SAT1_CF  | blue | na |
| chrUn | 23981981 | 23982783 | 803 SAT1_CF  | blue | na |
| chrUn | 23982796 | 23982904 | 109 SAT1_CF  | blue | na |
| chrUn | 23982925 | 23984102 | 1178 SAT1_CF | blue | na |
| chrUn | 23984114 | 23985443 | 1330 SAT1_CF | blue | na |
| chrUn | 23985486 | 23986818 | 1333 SAT1_CF | blue | na |
| chrUn | 23986935 | 23987477 | 543 SAT1_CF  | blue | na |
| chrUn | 23987489 | 23988350 | 862 SAT1_CF  | blue | na |
| chrUn | 23988363 | 23989697 | 1335 SAT1_CF | blue | na |
| chrUn | 23989739 | 23990699 | 961 SAT1_CF  | blue | na |
| chrUn | 23990779 | 23991287 | 509 SAT1_CF  | blue | na |
| chrUn | 23991300 | 23991488 | 189 SAT1_CF  | blue | na |
| chrUn | 23991540 | 23992483 | 944 SAT1_CF  | blue | na |
| chrUn | 23992496 | 23993160 | 665 SAT1_CF  | blue | na |
| chrUn | 23993202 | 23994162 | 961 SAT1_CF  | blue | na |
| chrUn | 23994216 | 23995234 | 1019 SAT1_CF | blue | na |
| chrUn | 23995274 | 23995775 | 502 SAT1_CF  | blue | na |
| chrUn | 23995788 | 23996453 | 666 SAT1_CF  | blue | na |
| chrUn | 23996496 | 23998047 | 1552 SAT1_CF | blue | na |
| chrUn | 23998061 | 23998414 | 354 SAT1_CF  | blue | na |
| chrUn | 23998520 | 23999086 | 567 SAT1_CF  | blue | na |
| chrUn | 23999108 | 24001004 | 1897 SAT1_CF | blue | na |
| chrUn | 24001048 | 24001611 | 564 SAT1_CF  | blue | na |
| chrUn | 24001654 | 24001848 | 195 SAT1_CF  | blue | na |
| chrUn | 24001876 | 24002427 | 552 SAT1_CF  | blue | na |
| chrUn | 24002439 | 24003241 | 803 SAT1_CF  | blue | na |
| chrUn | 24003262 | 24004466 | 1205 SAT1_CF | blue | na |
| chrUn | 24004510 | 24005073 | 564 SAT1_CF  | blue | na |
| chrUn | 24005152 | 24005677 | 526 SAT1_CF  | blue | na |
| chrUn | 24005692 | 24005834 | 143 SAT1_CF  | blue | na |
| chrUn | 24005894 | 24006395 | 502 SAT1_CF  | blue | na |
| chrUn | 24006407 | 24006516 | 110 SAT1_CF  | blue | na |
| chrUn | 24006537 | 24007169 | 633 SAT1_CF  | blue | na |
| chrUn | 24007181 | 24007848 | 668 SAT1_CF  | blue | na |
| chrUn | 24007905 | 24008451 | 547 SAT1_CF  | blue | na |
| chrUn | 24008494 | 24009730 | 1237 SAT1_CF | blue | na |
| chrUn | 24009742 | 24010602 | 861 SAT1_CF  | blue | na |

|       |          |          |              |      |    |
|-------|----------|----------|--------------|------|----|
| chrUn | 24010644 | 24011424 | 781 SAT1_CF  | blue | na |
| chrUn | 24011494 | 24012012 | 519 SAT1_CF  | blue | na |
| chrUn | 24012077 | 24012635 | 559 SAT1_CF  | blue | na |
| chrUn | 24012647 | 24014189 | 1543 SAT1_CF | blue | na |
| chrUn | 24014201 | 24014601 | 401 SAT1_CF  | blue | na |
| chrUn | 24014621 | 24015139 | 519 SAT1_CF  | blue | na |
| chrUn | 24015151 | 24015260 | 110 SAT1_CF  | blue | na |
| chrUn | 24015281 | 24016542 | 1262 SAT1_CF | blue | na |
| chrUn | 24016556 | 24017179 | 624 SAT1_CF  | blue | na |
| chrUn | 24017191 | 24017299 | 109 SAT1_CF  | blue | na |
| chrUn | 24017320 | 24017867 | 548 SAT1_CF  | blue | na |
| chrUn | 24017916 | 24019298 | 1383 SAT1_CF | blue | na |
| chrUn | 24019415 | 24020576 | 1162 SAT1_CF | blue | na |
| chrUn | 24020588 | 24021272 | 685 SAT1_CF  | blue | na |
| chrUn | 24021286 | 24022118 | 833 SAT1_CF  | blue | na |
| chrUn | 24022135 | 24023327 | 1193 SAT1_CF | blue | na |
| chrUn | 24023339 | 24024006 | 668 SAT1_CF  | blue | na |
| chrUn | 24024049 | 24026039 | 1991 SAT1_CF | blue | na |
| chrUn | 24026125 | 24026618 | 494 SAT1_CF  | blue | na |
| chrUn | 24026629 | 24029593 | 2965 SAT1_CF | blue | na |
| chrUn | 24029605 | 24030892 | 1288 SAT1_CF | blue | na |
| chrUn | 24030919 | 24032110 | 1192 SAT1_CF | blue | na |
| chrUn | 24032159 | 24032560 | 402 SAT1_CF  | blue | na |
| chrUn | 24032620 | 24033093 | 474 SAT1_CF  | blue | na |
| chrUn | 24033114 | 24033882 | 769 SAT1_CF  | blue | na |
| chrUn | 24033894 | 24034570 | 677 SAT1_CF  | blue | na |
| chrUn | 24034613 | 24035575 | 963 SAT1_CF  | blue | na |
| chrUn | 24035631 | 24036651 | 1021 SAT1_CF | blue | na |
| chrUn | 24036710 | 24037188 | 479 SAT1_CF  | blue | na |
| chrUn | 24037201 | 24037306 | 106 SAT1_CF  | blue | na |
| chrUn | 24037329 | 24038503 | 1175 SAT1_CF | blue | na |
| chrUn | 24038536 | 24038692 | 157 SAT1_CF  | blue | na |
| chrUn | 24038718 | 24039237 | 520 SAT1_CF  | blue | na |
| chrUn | 24039250 | 24039924 | 675 SAT1_CF  | blue | na |
| chrUn | 24039967 | 24041959 | 1993 SAT1_CF | blue | na |
| chrUn | 24042076 | 24042613 | 538 SAT1_CF  | blue | na |
| chrUn | 24042633 | 24042740 | 108 SAT1_CF  | blue | na |
| chrUn | 24042761 | 24043331 | 571 SAT1_CF  | blue | na |
| chrUn | 24043343 | 24044413 | 1071 SAT1_CF | blue | na |
| chrUn | 24044425 | 24045649 | 1225 SAT1_CF | blue | na |
| chrUn | 24045694 | 24046195 | 502 SAT1_CF  | blue | na |
| chrUn | 24046208 | 24047431 | 1224 SAT1_CF | blue | na |

|       |          |          |              |      |    |
|-------|----------|----------|--------------|------|----|
| chrUn | 24047443 | 24048089 | 647 SAT1_CF  | blue | na |
| chrUn | 24048113 | 24048465 | 353 SAT1_CF  | blue | na |
| chrUn | 24048487 | 24049276 | 790 SAT1_CF  | blue | na |
| chrUn | 24049456 | 24050168 | 713 SAT1_CF  | blue | na |
| chrUn | 24050191 | 24050924 | 734 SAT1_CF  | blue | na |
| chrUn | 24050991 | 24051514 | 524 SAT1_CF  | blue | na |
| chrUn | 24051529 | 24051686 | 158 SAT1_CF  | blue | na |
| chrUn | 24051712 | 24053633 | 1922 SAT1_CF | blue | na |
| chrUn | 24053661 | 24054630 | 970 SAT1_CF  | blue | na |
| chrUn | 24054641 | 24054877 | 237 SAT1_CF  | blue | na |
| chrUn | 24055058 | 24055238 | 181 SAT1_CF  | blue | na |
| chrUn | 24055278 | 24055777 | 500 SAT1_CF  | blue | na |
| chrUn | 24055790 | 24055896 | 107 SAT1_CF  | blue | na |
| chrUn | 24055919 | 24056938 | 1020 SAT1_CF | blue | na |
| chrUn | 24057061 | 24057565 | 505 SAT1_CF  | blue | na |
| chrUn | 24057577 | 24059288 | 1712 SAT1_CF | blue | na |
| chrUn | 24059316 | 24059473 | 158 SAT1_CF  | blue | na |
| chrUn | 24059518 | 24060020 | 503 SAT1_CF  | blue | na |
| chrUn | 24060033 | 24060706 | 674 SAT1_CF  | blue | na |
| chrUn | 24060718 | 24061394 | 677 SAT1_CF  | blue | na |
| chrUn | 24061437 | 24063426 | 1990 SAT1_CF | blue | na |
| chrUn | 24063570 | 24064063 | 494 SAT1_CF  | blue | na |
| chrUn | 24064094 | 24066102 | 2009 SAT1_CF | blue | na |
| chrUn | 24066155 | 24066656 | 502 SAT1_CF  | blue | na |
| chrUn | 24066668 | 24067776 | 1109 SAT1_CF | blue | na |
| chrUn | 24067816 | 24068316 | 501 SAT1_CF  | blue | na |
| chrUn | 24068329 | 24069010 | 682 SAT1_CF  | blue | na |
| chrUn | 24069023 | 24069782 | 760 SAT1_CF  | blue | na |
| chrUn | 24069794 | 24070429 | 636 SAT1_CF  | blue | na |
| chrUn | 24070443 | 24071513 | 1071 SAT1_CF | blue | na |
| chrUn | 24071529 | 24071914 | 386 SAT1_CF  | blue | na |
| chrUn | 24071948 | 24072468 | 521 SAT1_CF  | blue | na |
| chrUn | 24072480 | 24073814 | 1335 SAT1_CF | blue | na |
| chrUn | 24073839 | 24074164 | 326 SAT1_CF  | blue | na |
| chrUn | 24074243 | 24074792 | 550 SAT1_CF  | blue | na |
| chrUn | 24074806 | 24075204 | 399 SAT1_CF  | blue | na |
| chrUn | 24075225 | 24075742 | 518 SAT1_CF  | blue | na |
| chrUn | 24075755 | 24075860 | 106 SAT1_CF  | blue | na |
| chrUn | 24075882 | 24077153 | 1272 SAT1_CF | blue | na |
| chrUn | 24077168 | 24077310 | 143 SAT1_CF  | blue | na |
| chrUn | 24077370 | 24077872 | 503 SAT1_CF  | blue | na |
| chrUn | 24077885 | 24077991 | 107 SAT1_CF  | blue | na |

|       |          |          |              |      |    |
|-------|----------|----------|--------------|------|----|
| chrUn | 24078013 | 24078570 | 558 SAT1_CF  | blue | na |
| chrUn | 24078582 | 24079949 | 1368 SAT1_CF | blue | na |
| chrUn | 24079992 | 24080960 | 969 SAT1_CF  | blue | na |
| chrUn | 24080973 | 24081328 | 356 SAT1_CF  | blue | na |
| chrUn | 24081444 | 24081964 | 521 SAT1_CF  | blue | na |
| chrUn | 24081995 | 24082189 | 195 SAT1_CF  | blue | na |
| chrUn | 24082217 | 24083068 | 852 SAT1_CF  | blue | na |
| chrUn | 24083082 | 24083603 | 522 SAT1_CF  | blue | na |
| chrUn | 24083637 | 24083969 | 333 SAT1_CF  | blue | na |
| chrUn | 24084056 | 24084557 | 502 SAT1_CF  | blue | na |
| chrUn | 24084570 | 24084682 | 113 SAT1_CF  | blue | na |
| chrUn | 24084848 | 24085512 | 665 SAT1_CF  | blue | na |
| chrUn | 24085529 | 24087215 | 1687 SAT1_CF | blue | na |
| chrUn | 24087244 | 24087765 | 522 SAT1_CF  | blue | na |
| chrUn | 24087778 | 24088129 | 352 SAT1_CF  | blue | na |
| chrUn | 24088182 | 24088682 | 501 SAT1_CF  | blue | na |
| chrUn | 24088700 | 24089766 | 1067 SAT1_CF | blue | na |
| chrUn | 24089792 | 24090265 | 474 SAT1_CF  | blue | na |
| chrUn | 24090318 | 24090818 | 501 SAT1_CF  | blue | na |
| chrUn | 24090836 | 24091902 | 1067 SAT1_CF | blue | na |
| chrUn | 24091928 | 24092409 | 482 SAT1_CF  | blue | na |
| chrUn | 24092436 | 24094077 | 1642 SAT1_CF | blue | na |
| chrUn | 24094107 | 24094962 | 856 SAT1_CF  | blue | na |
| chrUn | 24094994 | 24095930 | 937 SAT1_CF  | blue | na |
| chrUn | 24095951 | 24096473 | 523 SAT1_CF  | blue | na |
| chrUn | 24096486 | 24097168 | 683 SAT1_CF  | blue | na |
| chrUn | 24097180 | 24098467 | 1288 SAT1_CF | blue | na |
| chrUn | 24098509 | 24099411 | 903 SAT1_CF  | blue | na |
| chrUn | 24099429 | 24099952 | 524 SAT1_CF  | blue | na |
| chrUn | 24099985 | 24100364 | 380 SAT1_CF  | blue | na |
| chrUn | 24100432 | 24100968 | 537 SAT1_CF  | blue | na |
| chrUn | 24100988 | 24101095 | 108 SAT1_CF  | blue | na |
| chrUn | 24101116 | 24101670 | 555 SAT1_CF  | blue | na |
| chrUn | 24101682 | 24102593 | 912 SAT1_CF  | blue | na |
| chrUn | 24102614 | 24103470 | 857 SAT1_CF  | blue | na |
| chrUn | 24103481 | 24103993 | 513 SAT1_CF  | blue | na |
| chrUn | 24104038 | 24105241 | 1204 SAT1_CF | blue | na |
| chrUn | 24105253 | 24106587 | 1335 SAT1_CF | blue | na |
| chrUn | 24106661 | 24109525 | 2865 SAT1_CF | blue | na |
| chrUn | 24109622 | 24110164 | 543 SAT1_CF  | blue | na |
| chrUn | 24110208 | 24110770 | 563 SAT1_CF  | blue | na |
| chrUn | 24110827 | 24111301 | 475 SAT1_CF  | blue | na |

|       |          |          |              |      |    |
|-------|----------|----------|--------------|------|----|
| chrUn | 24111328 | 24111918 | 591 SAT1_CF  | blue | na |
| chrUn | 24111936 | 24114359 | 2424 SAT1_CF | blue | na |
| chrUn | 24114397 | 24115243 | 847 SAT1_CF  | blue | na |
| chrUn | 24115255 | 24115367 | 113 SAT1_CF  | blue | na |
| chrUn | 24115383 | 24117641 | 2259 SAT1_CF | blue | na |
| chrUn | 24117685 | 24118344 | 660 SAT1_CF  | blue | na |
| chrUn | 24118414 | 24119082 | 669 SAT1_CF  | blue | na |
| chrUn | 24119096 | 24119829 | 734 SAT1_CF  | blue | na |
| chrUn | 24119840 | 24120282 | 443 SAT1_CF  | blue | na |
| chrUn | 24120560 | 24122850 | 2291 SAT1_CF | blue | na |
| chrUn | 24122886 | 24123817 | 932 SAT1_CF  | blue | na |
| chrUn | 24123838 | 24124477 | 640 SAT1_CF  | blue | na |
| chrUn | 24124500 | 24124968 | 469 SAT1_CF  | blue | na |
| chrUn | 24124988 | 24125962 | 975 SAT1_CF  | blue | na |
| chrUn | 24126017 | 24126519 | 503 SAT1_CF  | blue | na |
| chrUn | 24126531 | 24126637 | 107 SAT1_CF  | blue | na |
| chrUn | 24126661 | 24127289 | 629 SAT1_CF  | blue | na |
| chrUn | 24127340 | 24128170 | 831 SAT1_CF  | blue | na |
| chrUn | 24128183 | 24128873 | 691 SAT1_CF  | blue | na |
| chrUn | 24128885 | 24130215 | 1331 SAT1_CF | blue | na |
| chrUn | 24130258 | 24130820 | 563 SAT1_CF  | blue | na |
| chrUn | 24130901 | 24131425 | 525 SAT1_CF  | blue | na |
| chrUn | 24131440 | 24131680 | 241 SAT1_CF  | blue | na |
| chrUn | 24131698 | 24132190 | 493 SAT1_CF  | blue | na |
| chrUn | 24132247 | 24132794 | 548 SAT1_CF  | blue | na |
| chrUn | 24132836 | 24134292 | 1457 SAT1_CF | blue | na |
| chrUn | 24134548 | 24134680 | 133 SAT1_CF  | blue | na |
| chrUn | 24134768 | 24135247 | 480 SAT1_CF  | blue | na |
| chrUn | 24135260 | 24135365 | 106 SAT1_CF  | blue | na |
| chrUn | 24135388 | 24137082 | 1695 SAT1_CF | blue | na |
| chrUn | 24137095 | 24137855 | 761 SAT1_CF  | blue | na |
| chrUn | 24137879 | 24138550 | 672 SAT1_CF  | blue | na |
| chrUn | 24138562 | 24139490 | 929 SAT1_CF  | blue | na |
| chrUn | 24139503 | 24140664 | 1162 SAT1_CF | blue | na |
| chrUn | 24140706 | 24141330 | 625 SAT1_CF  | blue | na |
| chrUn | 24141343 | 24142382 | 1040 SAT1_CF | blue | na |
| chrUn | 24142397 | 24142554 | 158 SAT1_CF  | blue | na |
| chrUn | 24142599 | 24143681 | 1083 SAT1_CF | blue | na |
| chrUn | 24143692 | 24144294 | 603 SAT1_CF  | blue | na |
| chrUn | 24144306 | 24145092 | 787 SAT1_CF  | blue | na |
| chrUn | 24145137 | 24145639 | 503 SAT1_CF  | blue | na |
| chrUn | 24145652 | 24147021 | 1370 SAT1_CF | blue | na |



|       |          |          |              |        |    |
|-------|----------|----------|--------------|--------|----|
| chrUn | 24147101 | 24148216 | 1116 SAT1_CF | blue   | na |
| chrUn | 24148258 | 24149039 | 782 SAT1_CF  | blue   | na |
| chrUn | 24149082 | 24149626 | 545 SAT1_CF  | blue   | na |
| chrUn | 24149639 | 24150474 | 836 SAT1_CF  | blue   | na |
| chrUn | 24150487 | 24151189 | 703 SAT1_CF  | blue   | na |
| chrUn | 24151211 | 24153567 | 2357 SAT1_CF | blue   | na |
| chrUn | 24153581 | 24153737 | 157 SAT1_CF  | blue   | na |
| chrUn | 24153782 | 24154283 | 502 SAT1_CF  | blue   | na |
| chrUn | 24154310 | 24155929 | 1620 SAT1_CF | blue   | na |
| chrUn | 24155971 | 24156515 | 545 SAT1_CF  | blue   | na |
| chrUn | 24156553 | 24157667 | 1115 SAT1_CF | blue   | na |
| chrUn | 24157849 | 24158030 | 182 SAT1_CF  | blue   | na |
| chrUn | 24158051 | 24158570 | 520 SAT1_CF  | blue   | na |
| chrUn | 24158583 | 24158688 | 106 SAT1_CF  | blue   | na |
| chrUn | 24158711 | 24159344 | 634 SAT1_CF  | blue   | na |
| chrUn | 24159386 | 24160412 | 1027 SAT1_CF | blue   | na |
| chrUn | 24160461 | 24160553 | 93 SAT1_CF   | blue   | na |
| chrUn | 24160610 | 24160983 | 374 SAT1_CF  | blue   | na |
| chrUn | 24162728 | 24163154 | 427 CarSat1  | red    | na |
| chrUn | 24163186 | 24163910 | 725 CarSat1  | red    | na |
| chrUn | 24163921 | 24164914 | 994 SAT1_CF  | blue   | na |
| chrUn | 24164921 | 24166016 | 1096 CarSat1 | red    | na |
| chrUn | 24166175 | 24167030 | 856 CarSat1  | red    | na |
| chrUn | 24167052 | 24167904 | 853 CarSat1  | red    | na |
| chrUn | 24167925 | 24169505 | 1581 CarSat1 | red    | na |
| chrUn | 24169634 | 24170239 | 606 CarSat1  | red    | na |
| chrUn | 24187685 | 24187847 | 163 Sat2CF   | purple | na |
| chrUn | 24187713 | 24188406 | 694 Sat2CF   | purple | na |
| chrUn | 24188303 | 24188423 | 121 Sat2CF   | purple | na |
| chrUn | 24212904 | 24214062 | 1159 Sat2CF  | purple | na |
| chrUn | 24216543 | 24216677 | 135 CarSat1  | red    | na |
| chrUn | 24216704 | 24218188 | 1485 CarSat1 | red    | na |
| chrUn | 24227674 | 24228081 | 408 CarSat1  | red    | na |
| chrUn | 24228115 | 24229554 | 1440 CarSat1 | red    | na |
| chrUn | 24229739 | 24230127 | 389 CarSat1  | red    | na |
| chrUn | 24230146 | 24230548 | 403 CarSat1  | red    | na |
| chrUn | 24230584 | 24231953 | 1370 SAT1_CF | blue   | na |
| chrUn | 24232148 | 24232309 | 162 Sat2CF   | purple | na |
| chrUn | 24232181 | 24233045 | 865 Sat2CF   | purple | na |
| chrUn | 24232949 | 24233056 | 108 Sat2CF   | purple | na |
| chrUn | 24246454 | 24246769 | 316 SAT1_CF  | blue   | na |
| chrUn | 24388120 | 24388696 | 577 CarSat1  | red    | na |

|       |          |          |      |         |        |    |
|-------|----------|----------|------|---------|--------|----|
| chrUn | 24388726 | 24389766 | 1041 | CarSat1 | red    | na |
| chrUn | 24389787 | 24390189 | 403  | CarSat1 | red    | na |
| chrUn | 24390203 | 24390260 | 58   | CarSat1 | red    | na |
| chrUn | 24396291 | 24396964 | 674  | CarSat1 | red    | na |
| chrUn | 24396984 | 24398484 | 1501 | CarSat1 | red    | na |
| chrUn | 24398505 | 24399362 | 858  | CarSat1 | red    | na |
| chrUn | 24399383 | 24401257 | 1875 | CarSat1 | red    | na |
| chrUn | 24401265 | 24402656 | 1392 | SAT1_CF | blue   | na |
| chrUn | 24402851 | 24403013 | 163  | Sat2CF  | purple | na |
| chrUn | 24402884 | 24403879 | 996  | Sat2CF  | purple | na |
| chrUn | 24415682 | 24417747 | 2066 | SAT1_CF | blue   | na |
| chrUn | 24417801 | 24418331 | 531  | SAT1_CF | blue   | na |
| chrUn | 24418375 | 24419563 | 1189 | SAT1_CF | blue   | na |
| chrUn | 24419575 | 24419874 | 300  | SAT1_CF | blue   | na |
| chrUn | 24419879 | 24420817 | 939  | CarSat1 | red    | na |
| chrUn | 24420829 | 24422593 | 1765 | CarSat1 | red    | na |
| chrUn | 24422614 | 24424202 | 1589 | CarSat1 | red    | na |
| chrUn | 24424223 | 24424747 | 525  | CarSat1 | red    | na |
| chrUn | 24425123 | 24425320 | 198  | Sat2CF  | purple | na |
| chrUn | 24425145 | 24426312 | 1168 | Sat2CF  | purple | na |
| chrUn | 24426204 | 24426381 | 178  | Sat2CF  | purple | na |
| chrUn | 24441454 | 24442260 | 807  | Sat2CF  | purple | na |
| chrUn | 24441516 | 24442238 | 723  | Sat2CF  | purple | na |
| chrUn | 24498436 | 24498598 | 163  | Sat2CF  | purple | na |
| chrUn | 24498464 | 24498821 | 358  | Sat2CF  | purple | na |
| chrUn | 24498503 | 24499331 | 829  | Sat2CF  | purple | na |
| chrUn | 24521218 | 24521380 | 163  | Sat2CF  | purple | na |
| chrUn | 24521246 | 24521605 | 360  | Sat2CF  | purple | na |
| chrUn | 24521285 | 24522069 | 785  | Sat2CF  | purple | na |
| chrUn | 24537525 | 24538659 | 1135 | Sat2CF  | purple | na |
| chrUn | 24569851 | 24571018 | 1168 | Sat2CF  | purple | na |
| chrUn | 24623998 | 24624518 | 521  | Sat2CF  | purple | na |
| chrUn | 24624063 | 24624518 | 456  | Sat2CF  | purple | na |
| chrUn | 24624709 | 24624846 | 138  | Sat2CF  | purple | na |
| chrUn | 24624723 | 24625273 | 551  | Sat2CF  | purple | na |
| chrUn | 24625149 | 24625350 | 202  | Sat2CF  | purple | na |
| chrUn | 24626978 | 24627391 | 414  | CarSat1 | red    | na |
| chrUn | 24628195 | 24628337 | 143  | CarSat1 | red    | na |
| chrUn | 24628358 | 24629072 | 715  | CarSat1 | red    | na |
| chrUn | 24629231 | 24631264 | 2034 | CarSat1 | red    | na |
| chrUn | 24637770 | 24639346 | 1577 | SAT1_CF | blue   | na |
| chrUn | 24639360 | 24641721 | 2362 | SAT1_CF | blue   | na |

|       |          |          |              |      |    |
|-------|----------|----------|--------------|------|----|
| chrUn | 24641733 | 24642340 | 608 SAT1_CF  | blue | na |
| chrUn | 24642351 | 24642896 | 546 SAT1_CF  | blue | na |
| chrUn | 24642909 | 24643875 | 967 SAT1_CF  | blue | na |
| chrUn | 24643919 | 24644435 | 517 SAT1_CF  | blue | na |
| chrUn | 24650896 | 24653680 | 2785 SAT1_CF | blue | na |
| chrUn | 24653723 | 24654253 | 531 SAT1_CF  | blue | na |
| chrUn | 24654297 | 24655811 | 1515 SAT1_CF | blue | na |
| chrUn | 24655816 | 24656753 | 938 CarSat1  | red  | na |
| chrUn | 24656785 | 24658533 | 1749 CarSat1 | red  | na |
| chrUn | 24658598 | 24659543 | 946 CarSat1  | red  | na |
| chrUn | 24671662 | 24672191 | 530 SAT1_CF  | blue | na |
| chrUn | 24672277 | 24672413 | 137 SAT1_CF  | blue | na |
| chrUn | 24672433 | 24673340 | 908 SAT1_CF  | blue | na |
| chrUn | 24673410 | 24674470 | 1061 SAT1_CF | blue | na |
| chrUn | 24674568 | 24675220 | 653 SAT1_CF  | blue | na |
| chrUn | 24675270 | 24676228 | 959 SAT1_CF  | blue | na |
| chrUn | 24676258 | 24678742 | 2485 SAT1_CF | blue | na |
| chrUn | 24678812 | 24680427 | 1616 SAT1_CF | blue | na |
| chrUn | 24680438 | 24680939 | 502 SAT1_CF  | blue | na |
| chrUn | 24680979 | 24681344 | 366 SAT1_CF  | blue | na |
| chrUn | 24681391 | 24681897 | 507 SAT1_CF  | blue | na |
| chrUn | 24681977 | 24682940 | 964 SAT1_CF  | blue | na |
| chrUn | 24682985 | 24684349 | 1365 SAT1_CF | blue | na |
| chrUn | 24684362 | 24686760 | 2399 SAT1_CF | blue | na |
| chrUn | 24686803 | 24687478 | 676 SAT1_CF  | blue | na |
| chrUn | 24687490 | 24688121 | 632 SAT1_CF  | blue | na |
| chrUn | 24688142 | 24688251 | 110 SAT1_CF  | blue | na |
| chrUn | 24688263 | 24688763 | 501 SAT1_CF  | blue | na |
| chrUn | 24688850 | 24689205 | 356 SAT1_CF  | blue | na |
| chrUn | 24689219 | 24689830 | 612 SAT1_CF  | blue | na |
| chrUn | 24689874 | 24690547 | 674 SAT1_CF  | blue | na |
| chrUn | 24690589 | 24691155 | 567 SAT1_CF  | blue | na |
| chrUn | 24691175 | 24691284 | 110 SAT1_CF  | blue | na |
| chrUn | 24691296 | 24691773 | 478 SAT1_CF  | blue | na |
| chrUn | 24691830 | 24691902 | 73 SAT1_CF   | blue | na |
| chrUn | 24691914 | 24692416 | 503 SAT1_CF  | blue | na |
| chrUn | 24692469 | 24693377 | 909 SAT1_CF  | blue | na |
| chrUn | 24693458 | 24695752 | 2295 SAT1_CF | blue | na |
| chrUn | 24695820 | 24697153 | 1334 SAT1_CF | blue | na |
| chrUn | 24697197 | 24698530 | 1334 SAT1_CF | blue | na |
| chrUn | 24698542 | 24700207 | 1666 SAT1_CF | blue | na |
| chrUn | 24700221 | 24700904 | 684 SAT1_CF  | blue | na |

|       |          |          |              |      |    |
|-------|----------|----------|--------------|------|----|
| chrUn | 24700916 | 24701417 | 502 SAT1_CF  | blue | na |
| chrUn | 24701463 | 24702465 | 1003 SAT1_CF | blue | na |
| chrUn | 24702497 | 24702994 | 498 SAT1_CF  | blue | na |
| chrUn | 24703382 | 24705080 | 1699 SAT1_CF | blue | na |
| chrUn | 24705107 | 24705208 | 102 SAT1_CF  | blue | na |
| chrUn | 24705222 | 24705712 | 491 SAT1_CF  | blue | na |
| chrUn | 24705723 | 24706406 | 684 SAT1_CF  | blue | na |
| chrUn | 24706418 | 24707099 | 682 SAT1_CF  | blue | na |
| chrUn | 24707112 | 24707619 | 508 SAT1_CF  | blue | na |
| chrUn | 24707701 | 24709197 | 1497 SAT1_CF | blue | na |
| chrUn | 24709224 | 24710444 | 1221 SAT1_CF | blue | na |
| chrUn | 24710458 | 24710950 | 493 SAT1_CF  | blue | na |
| chrUn | 24710961 | 24711643 | 683 SAT1_CF  | blue | na |
| chrUn | 24711655 | 24712209 | 555 SAT1_CF  | blue | na |
| chrUn | 24712279 | 24714355 | 2077 SAT1_CF | blue | na |
| chrUn | 24714380 | 24714486 | 107 SAT1_CF  | blue | na |
| chrUn | 24714499 | 24715203 | 705 SAT1_CF  | blue | na |
| chrUn | 24715235 | 24715739 | 505 SAT1_CF  | blue | na |
| chrUn | 24715772 | 24716989 | 1218 SAT1_CF | blue | na |
| chrUn | 24717034 | 24717191 | 158 SAT1_CF  | blue | na |
| chrUn | 24717293 | 24717816 | 524 SAT1_CF  | blue | na |
| chrUn | 24717957 | 24719630 | 1674 SAT1_CF | blue | na |
| chrUn | 24719642 | 24720222 | 581 SAT1_CF  | blue | na |
| chrUn | 24720243 | 24721917 | 1675 SAT1_CF | blue | na |
| chrUn | 24721960 | 24722634 | 675 SAT1_CF  | blue | na |
| chrUn | 24722646 | 24723332 | 687 SAT1_CF  | blue | na |
| chrUn | 24723343 | 24723843 | 501 SAT1_CF  | blue | na |
| chrUn | 24723901 | 24723979 | 79 SAT1_CF   | blue | na |
| chrUn | 24724033 | 24724557 | 525 SAT1_CF  | blue | na |
| chrUn | 24724636 | 24725198 | 563 SAT1_CF  | blue | na |
| chrUn | 24725241 | 24725879 | 639 SAT1_CF  | blue | na |
| chrUn | 24725892 | 24726566 | 675 SAT1_CF  | blue | na |
| chrUn | 24726578 | 24728175 | 1598 SAT1_CF | blue | na |
| chrUn | 24728187 | 24728741 | 555 SAT1_CF  | blue | na |
| chrUn | 24728763 | 24729519 | 757 SAT1_CF  | blue | na |
| chrUn | 24729531 | 24730212 | 682 SAT1_CF  | blue | na |
| chrUn | 24730225 | 24730726 | 502 SAT1_CF  | blue | na |
| chrUn | 24730769 | 24732081 | 1313 SAT1_CF | blue | na |
| chrUn | 24732988 | 24733525 | 538 SAT1_CF  | blue | na |
| chrUn | 24733537 | 24735453 | 1917 SAT1_CF | blue | na |
| chrUn | 24735498 | 24736037 | 540 SAT1_CF  | blue | na |
| chrUn | 24736048 | 24736140 | 93 SAT1_CF   | blue | na |

|       |          |          |      |         |      |    |
|-------|----------|----------|------|---------|------|----|
| chrUn | 24736153 | 24737310 | 1158 | SAT1_CF | blue | na |
| chrUn | 24737376 | 24737510 | 135  | SAT1_CF | blue | na |
| chrUn | 24737564 | 24738765 | 1202 | SAT1_CF | blue | na |
| chrUn | 24738792 | 24739033 | 242  | SAT1_CF | blue | na |
| chrUn | 24739047 | 24739538 | 492  | SAT1_CF | blue | na |
| chrUn | 24739549 | 24740232 | 684  | SAT1_CF | blue | na |
| chrUn | 24740244 | 24740922 | 679  | SAT1_CF | blue | na |
| chrUn | 24740941 | 24741459 | 519  | SAT1_CF | blue | na |
| chrUn | 24741529 | 24741987 | 459  | SAT1_CF | blue | na |
| chrUn | 24742042 | 24742719 | 678  | SAT1_CF | blue | na |
| chrUn | 24742731 | 24744470 | 1740 | SAT1_CF | blue | na |
| chrUn | 24744514 | 24745060 | 547  | SAT1_CF | blue | na |
| chrUn | 24745080 | 24745189 | 110  | SAT1_CF | blue | na |
| chrUn | 24745201 | 24745873 | 673  | SAT1_CF | blue | na |
| chrUn | 24745903 | 24746396 | 494  | SAT1_CF | blue | na |
| chrUn | 24746442 | 24747009 | 568  | SAT1_CF | blue | na |
| chrUn | 24748421 | 24748983 | 563  | SAT1_CF | blue | na |
| chrUn | 24749034 | 24750628 | 1595 | SAT1_CF | blue | na |
| chrUn | 24750642 | 24752709 | 2068 | SAT1_CF | blue | na |
| chrUn | 24752725 | 24754155 | 1431 | SAT1_CF | blue | na |
| chrUn | 24754179 | 24754844 | 666  | SAT1_CF | blue | na |
| chrUn | 24754871 | 24755372 | 502  | SAT1_CF | blue | na |
| chrUn | 24755415 | 24756335 | 921  | SAT1_CF | blue | na |
| chrUn | 24756397 | 24757415 | 1019 | SAT1_CF | blue | na |
| chrUn | 24757438 | 24758120 | 683  | SAT1_CF | blue | na |
| chrUn | 24758132 | 24758633 | 502  | SAT1_CF | blue | na |
| chrUn | 24758689 | 24759038 | 350  | SAT1_CF | blue | na |
| chrUn | 24759071 | 24760441 | 1371 | SAT1_CF | blue | na |
| chrUn | 24760518 | 24761378 | 861  | SAT1_CF | blue | na |
| chrUn | 24761390 | 24762244 | 855  | SAT1_CF | blue | na |
| chrUn | 24762262 | 24762866 | 605  | SAT1_CF | blue | na |
| chrUn | 24762886 | 24763379 | 494  | SAT1_CF | blue | na |
| chrUn | 24763422 | 24763820 | 399  | SAT1_CF | blue | na |
| chrUn | 24763831 | 24764354 | 524  | SAT1_CF | blue | na |
| chrUn | 24764386 | 24765241 | 856  | SAT1_CF | blue | na |
| chrUn | 24765318 | 24765858 | 541  | SAT1_CF | blue | na |
| chrUn | 24765908 | 24766593 | 686  | SAT1_CF | blue | na |
| chrUn | 24766605 | 24767210 | 606  | SAT1_CF | blue | na |
| chrUn | 24767223 | 24770032 | 2810 | SAT1_CF | blue | na |
| chrUn | 24770051 | 24770492 | 442  | SAT1_CF | blue | na |
| chrUn | 24770548 | 24771116 | 569  | SAT1_CF | blue | na |
| chrUn | 24771181 | 24771338 | 158  | SAT1_CF | blue | na |

|       |          |          |              |      |    |
|-------|----------|----------|--------------|------|----|
| chrUn | 24771353 | 24771877 | 525 SAT1_CF  | blue | na |
| chrUn | 24771958 | 24772483 | 526 SAT1_CF  | blue | na |
| chrUn | 24772564 | 24773936 | 1373 SAT1_CF | blue | na |
| chrUn | 24773949 | 24774449 | 501 SAT1_CF  | blue | na |
| chrUn | 24774507 | 24774640 | 134 SAT1_CF  | blue | na |
| chrUn | 24774667 | 24775177 | 511 SAT1_CF  | blue | na |
| chrUn | 24775257 | 24776479 | 1223 SAT1_CF | blue | na |
| chrUn | 24776525 | 24777864 | 1340 SAT1_CF | blue | na |
| chrUn | 24777881 | 24778764 | 884 SAT1_CF  | blue | na |
| chrUn | 24778776 | 24780360 | 1585 SAT1_CF | blue | na |
| chrUn | 24780374 | 24780535 | 162 SAT1_CF  | blue | na |
| chrUn | 24780551 | 24781087 | 537 SAT1_CF  | blue | na |
| chrUn | 24781129 | 24781737 | 609 SAT1_CF  | blue | na |
| chrUn | 24786702 | 24787290 | 589 SAT1_CF  | blue | na |
| chrUn | 24787311 | 24787712 | 402 SAT1_CF  | blue | na |
| chrUn | 24787763 | 24788305 | 543 SAT1_CF  | blue | na |
| chrUn | 24788384 | 24789809 | 1426 SAT1_CF | blue | na |
| chrUn | 24789822 | 24790343 | 522 SAT1_CF  | blue | na |
| chrUn | 24790377 | 24791104 | 728 SAT1_CF  | blue | na |
| chrUn | 24791185 | 24792149 | 965 SAT1_CF  | blue | na |
| chrUn | 24792192 | 24793548 | 1357 SAT1_CF | blue | na |
| chrUn | 24793575 | 24794466 | 892 SAT1_CF  | blue | na |
| chrUn | 24794478 | 24795172 | 695 SAT1_CF  | blue | na |
| chrUn | 24795184 | 24795783 | 600 SAT1_CF  | blue | na |
| chrUn | 24795808 | 24796321 | 514 SAT1_CF  | blue | na |
| chrUn | 24796347 | 24797300 | 954 SAT1_CF  | blue | na |
| chrUn | 24797379 | 24798340 | 962 SAT1_CF  | blue | na |
| chrUn | 24798383 | 24800486 | 2104 SAT1_CF | blue | na |
| chrUn | 24800529 | 24801212 | 684 SAT1_CF  | blue | na |
| chrUn | 24801224 | 24801726 | 503 SAT1_CF  | blue | na |
| chrUn | 24801792 | 24801949 | 158 SAT1_CF  | blue | na |
| chrUn | 24801983 | 24803588 | 1606 SAT1_CF | blue | na |
| chrUn | 24803633 | 24804178 | 546 SAT1_CF  | blue | na |
| chrUn | 24804234 | 24804306 | 73 SAT1_CF   | blue | na |
| chrUn | 24804318 | 24804838 | 521 SAT1_CF  | blue | na |
| chrUn | 24804858 | 24806672 | 1815 SAT1_CF | blue | na |
| chrUn | 24806698 | 24807909 | 1212 SAT1_CF | blue | na |
| chrUn | 24807978 | 24808284 | 307 SAT1_CF  | blue | na |
| chrUn | 24808297 | 24808798 | 502 SAT1_CF  | blue | na |
| chrUn | 24808864 | 24809000 | 137 SAT1_CF  | blue | na |
| chrUn | 24809033 | 24809537 | 505 SAT1_CF  | blue | na |
| chrUn | 24809569 | 24810145 | 577 SAT1_CF  | blue | na |

|       |          |          |              |      |    |
|-------|----------|----------|--------------|------|----|
| chrUn | 24810168 | 24810274 | 107 SAT1_CF  | blue | na |
| chrUn | 24810287 | 24810786 | 500 SAT1_CF  | blue | na |
| chrUn | 24810834 | 24812787 | 1954 SAT1_CF | blue | na |
| chrUn | 24812830 | 24814190 | 1361 SAT1_CF | blue | na |
| chrUn | 24814212 | 24815641 | 1430 SAT1_CF | blue | na |
| chrUn | 24815694 | 24816060 | 367 SAT1_CF  | blue | na |
| chrUn | 24816093 | 24818430 | 2338 SAT1_CF | blue | na |
| chrUn | 24818448 | 24819677 | 1230 SAT1_CF | blue | na |
| chrUn | 24819691 | 24821205 | 1515 SAT1_CF | blue | na |
| chrUn | 24821292 | 24821809 | 518 SAT1_CF  | blue | na |
| chrUn | 24823231 | 24823792 | 562 SAT1_CF  | blue | na |
| chrUn | 24823807 | 24825438 | 1632 SAT1_CF | blue | na |
| chrUn | 24825452 | 24825943 | 492 SAT1_CF  | blue | na |
| chrUn | 24825954 | 24827329 | 1376 SAT1_CF | blue | na |
| chrUn | 24827342 | 24827834 | 493 SAT1_CF  | blue | na |
| chrUn | 24827876 | 24830662 | 2787 SAT1_CF | blue | na |
| chrUn | 24830676 | 24831698 | 1023 SAT1_CF | blue | na |
| chrUn | 24831719 | 24832678 | 960 SAT1_CF  | blue | na |
| chrUn | 24832757 | 24833716 | 960 SAT1_CF  | blue | na |
| chrUn | 24833760 | 24835131 | 1372 SAT1_CF | blue | na |
| chrUn | 24835144 | 24835643 | 500 SAT1_CF  | blue | na |
| chrUn | 24835683 | 24836644 | 962 SAT1_CF  | blue | na |
| chrUn | 24836723 | 24837890 | 1168 SAT1_CF | blue | na |
| chrUn | 24837902 | 24839048 | 1147 SAT1_CF | blue | na |
| chrUn | 24839083 | 24840048 | 966 SAT1_CF  | blue | na |
| chrUn | 24840091 | 24840761 | 671 SAT1_CF  | blue | na |
| chrUn | 24840786 | 24841280 | 495 SAT1_CF  | blue | na |
| chrUn | 24841367 | 24841883 | 517 SAT1_CF  | blue | na |
| chrUn | 24843307 | 24843830 | 524 SAT1_CF  | blue | na |
| chrUn | 24843881 | 24844725 | 845 SAT1_CF  | blue | na |
| chrUn | 24844768 | 24846416 | 1649 SAT1_CF | blue | na |
| chrUn | 24846443 | 24846962 | 520 SAT1_CF  | blue | na |
| chrUn | 24846988 | 24847145 | 158 SAT1_CF  | blue | na |
| chrUn | 24847160 | 24848101 | 942 SAT1_CF  | blue | na |
| chrUn | 24848112 | 24849316 | 1205 SAT1_CF | blue | na |
| chrUn | 24849336 | 24849445 | 110 SAT1_CF  | blue | na |
| chrUn | 24849457 | 24850655 | 1199 SAT1_CF | blue | na |
| chrUn | 24850700 | 24851479 | 780 SAT1_CF  | blue | na |
| chrUn | 24851497 | 24852181 | 685 SAT1_CF  | blue | na |
| chrUn | 24852197 | 24852983 | 787 SAT1_CF  | blue | na |
| chrUn | 24853005 | 24853806 | 802 SAT1_CF  | blue | na |
| chrUn | 24853826 | 24854319 | 494 SAT1_CF  | blue | na |

|       |          |          |              |        |    |
|-------|----------|----------|--------------|--------|----|
| chrUn | 24854359 | 24856393 | 2035 SAT1_CF | blue   | na |
| chrUn | 24856435 | 24857099 | 665 SAT1_CF  | blue   | na |
| chrUn | 24857122 | 24858317 | 1196 SAT1_CF | blue   | na |
| chrUn | 24858357 | 24858924 | 568 SAT1_CF  | blue   | na |
| chrUn | 24858925 | 24860062 | 1138 CarSat1 | red    | na |
| chrUn | 24860079 | 24862166 | 2088 CarSat1 | red    | na |
| chrUn | 24862191 | 24862901 | 711 CarSat1  | red    | na |
| chrUn | 24862926 | 24863634 | 709 CarSat1  | red    | na |
| chrUn | 24863651 | 24867310 | 3660 CarSat1 | red    | na |
| chrUn | 24867525 | 24872117 | 4593 CarSat1 | red    | na |
| chrUn | 24872144 | 24876899 | 4756 CarSat1 | red    | na |
| chrUn | 24877373 | 24879212 | 1840 CarSat1 | red    | na |
| chrUn | 24879242 | 24880689 | 1448 CarSat1 | red    | na |
| chrUn | 24880719 | 24882161 | 1443 CarSat1 | red    | na |
| chrUn | 24882191 | 24883636 | 1446 CarSat1 | red    | na |
| chrUn | 24883651 | 24883777 | 127 Carsat2  | orange | na |
| chrUn | 24883666 | 24884373 | 708 CarSat1  | red    | na |
| chrUn | 24884388 | 24884515 | 128 Carsat2  | orange | na |
| chrUn | 24884403 | 24888063 | 3661 CarSat1 | red    | na |
| chrUn | 24888093 | 24894691 | 6599 CarSat1 | red    | na |
| chrUn | 24894721 | 24897710 | 2990 CarSat1 | red    | na |
| chrUn | 24898728 | 24900359 | 1632 SAT1_CF | blue   | na |
| chrUn | 24900371 | 24901487 | 1117 SAT1_CF | blue   | na |
| chrUn | 24901515 | 24902146 | 632 SAT1_CF  | blue   | na |
| chrUn | 24902189 | 24902859 | 671 SAT1_CF  | blue   | na |
| chrUn | 24902877 | 24903562 | 686 SAT1_CF  | blue   | na |
| chrUn | 24903574 | 24904056 | 483 SAT1_CF  | blue   | na |
| chrUn | 24904076 | 24904336 | 261 SAT1_CF  | blue   | na |
| chrUn | 24904375 | 24904537 | 163 SAT1_CF  | blue   | na |
| chrUn | 24904550 | 24907736 | 3187 SAT1_CF | blue   | na |
| chrUn | 24907782 | 24908638 | 857 SAT1_CF  | blue   | na |
| chrUn | 24908650 | 24909836 | 1187 SAT1_CF | blue   | na |
| chrUn | 24909857 | 24910282 | 426 SAT1_CF  | blue   | na |
| chrUn | 24910326 | 24911528 | 1203 SAT1_CF | blue   | na |
| chrUn | 24911550 | 24912188 | 639 SAT1_CF  | blue   | na |
| chrUn | 24912256 | 24912755 | 500 SAT1_CF  | blue   | na |
| chrUn | 24912774 | 24914890 | 2117 SAT1_CF | blue   | na |
| chrUn | 24914902 | 24915866 | 965 SAT1_CF  | blue   | na |
| chrUn | 24915893 | 24916412 | 520 SAT1_CF  | blue   | na |
| chrUn | 24916440 | 24916834 | 395 SAT1_CF  | blue   | na |
| chrUn | 24916867 | 24917331 | 465 SAT1_CF  | blue   | na |
| chrUn | 24917362 | 24918221 | 860 SAT1_CF  | blue   | na |



|       |          |          |              |      |    |
|-------|----------|----------|--------------|------|----|
| chrUn | 24918243 | 24918846 | 604 SAT1_CF  | blue | na |
| chrUn | 24918870 | 24918959 | 90 SAT1_CF   | blue | na |
| chrUn | 24918986 | 24919466 | 481 SAT1_CF  | blue | na |
| chrUn | 24919575 | 24920101 | 527 SAT1_CF  | blue | na |
| chrUn | 24921515 | 24922758 | 1244 SAT1_CF | blue | na |
| chrUn | 24922837 | 24923455 | 619 SAT1_CF  | blue | na |
| chrUn | 24923467 | 24924724 | 1258 SAT1_CF | blue | na |
| chrUn | 24924789 | 24925515 | 727 SAT1_CF  | blue | na |
| chrUn | 24925526 | 24926145 | 620 SAT1_CF  | blue | na |
| chrUn | 24926217 | 24926806 | 590 SAT1_CF  | blue | na |
| chrUn | 24926823 | 24927196 | 374 SAT1_CF  | blue | na |
| chrUn | 24927242 | 24927868 | 627 SAT1_CF  | blue | na |
| chrUn | 24927933 | 24928412 | 480 SAT1_CF  | blue | na |
| chrUn | 24928519 | 24929243 | 725 SAT1_CF  | blue | na |
| chrUn | 24929257 | 24929749 | 493 SAT1_CF  | blue | na |
| chrUn | 24929760 | 24930442 | 683 SAT1_CF  | blue | na |
| chrUn | 24930454 | 24931137 | 684 SAT1_CF  | blue | na |
| chrUn | 24931150 | 24932425 | 1276 SAT1_CF | blue | na |
| chrUn | 24932465 | 24933609 | 1145 SAT1_CF | blue | na |
| chrUn | 24933703 | 24934316 | 614 SAT1_CF  | blue | na |
| chrUn | 24934328 | 24935011 | 684 SAT1_CF  | blue | na |
| chrUn | 24935024 | 24935525 | 502 SAT1_CF  | blue | na |
| chrUn | 24935591 | 24935728 | 138 SAT1_CF  | blue | na |
| chrUn | 24935755 | 24936877 | 1123 SAT1_CF | blue | na |
| chrUn | 24936911 | 24937545 | 635 SAT1_CF  | blue | na |
| chrUn | 24937570 | 24938811 | 1242 SAT1_CF | blue | na |
| chrUn | 24938824 | 24939325 | 502 SAT1_CF  | blue | na |
| chrUn | 24939412 | 24940744 | 1333 SAT1_CF | blue | na |
| chrUn | 24940788 | 24941433 | 646 SAT1_CF  | blue | na |
| chrUn | 24941445 | 24943180 | 1736 SAT1_CF | blue | na |
| chrUn | 24943218 | 24945076 | 1859 SAT1_CF | blue | na |
| chrUn | 24945118 | 24945903 | 786 SAT1_CF  | blue | na |
| chrUn | 24945932 | 24946672 | 741 SAT1_CF  | blue | na |
| chrUn | 24946770 | 24947422 | 653 SAT1_CF  | blue | na |
| chrUn | 24947472 | 24948783 | 1312 SAT1_CF | blue | na |
| chrUn | 24948804 | 24949310 | 507 SAT1_CF  | blue | na |
| chrUn | 24949390 | 24950353 | 964 SAT1_CF  | blue | na |
| chrUn | 24950398 | 24951764 | 1367 SAT1_CF | blue | na |
| chrUn | 24951777 | 24954175 | 2399 SAT1_CF | blue | na |
| chrUn | 24954218 | 24954763 | 546 SAT1_CF  | blue | na |
| chrUn | 24954785 | 24955536 | 752 SAT1_CF  | blue | na |
| chrUn | 24955557 | 24955666 | 110 SAT1_CF  | blue | na |

|       |          |          |              |      |    |
|-------|----------|----------|--------------|------|----|
| chrUn | 24955678 | 24956178 | 501 SAT1_CF  | blue | na |
| chrUn | 24956265 | 24956620 | 356 SAT1_CF  | blue | na |
| chrUn | 24956634 | 24958249 | 1616 SAT1_CF | blue | na |
| chrUn | 24958292 | 24959532 | 1241 SAT1_CF | blue | na |
| chrUn | 24959554 | 24959661 | 108 SAT1_CF  | blue | na |
| chrUn | 24959674 | 24960174 | 501 SAT1_CF  | blue | na |
| chrUn | 24960214 | 24960615 | 402 SAT1_CF  | blue | na |
| chrUn | 24960626 | 24961248 | 623 SAT1_CF  | blue | na |
| chrUn | 24961290 | 24962252 | 963 SAT1_CF  | blue | na |
| chrUn | 24962295 | 24962840 | 546 SAT1_CF  | blue | na |
| chrUn | 24962860 | 24962969 | 110 SAT1_CF  | blue | na |
| chrUn | 24962981 | 24963458 | 478 SAT1_CF  | blue | na |
| chrUn | 24963515 | 24963587 | 73 SAT1_CF   | blue | na |
| chrUn | 24963599 | 24964101 | 503 SAT1_CF  | blue | na |
| chrUn | 24964154 | 24965063 | 910 SAT1_CF  | blue | na |
| chrUn | 24965093 | 24966897 | 1805 SAT1_CF | blue | na |
| chrUn | 24966909 | 24967856 | 948 SAT1_CF  | blue | na |
| chrUn | 24967899 | 24968568 | 670 SAT1_CF  | blue | na |
| chrUn | 24968582 | 24969262 | 681 SAT1_CF  | blue | na |
| chrUn | 24969275 | 24970163 | 889 SAT1_CF  | blue | na |
| chrUn | 24970175 | 24971839 | 1665 SAT1_CF | blue | na |
| chrUn | 24971885 | 24972745 | 861 SAT1_CF  | blue | na |
| chrUn | 24972757 | 24973258 | 502 SAT1_CF  | blue | na |
| chrUn | 24973304 | 24974679 | 1376 SAT1_CF | blue | na |
| chrUn | 24974723 | 24976055 | 1333 SAT1_CF | blue | na |
| chrUn | 24976067 | 24976673 | 607 SAT1_CF  | blue | na |
| chrUn | 24976686 | 24977205 | 520 SAT1_CF  | blue | na |
| chrUn | 24977239 | 24977376 | 138 SAT1_CF  | blue | na |
| chrUn | 24977417 | 24978983 | 1567 SAT1_CF | blue | na |
| chrUn | 24979100 | 24980897 | 1798 SAT1_CF | blue | na |
| chrUn | 24980910 | 24981409 | 500 SAT1_CF  | blue | na |
| chrUn | 24981436 | 24981537 | 102 SAT1_CF  | blue | na |
| chrUn | 24981551 | 24982041 | 491 SAT1_CF  | blue | na |
| chrUn | 24982052 | 24982735 | 684 SAT1_CF  | blue | na |
| chrUn | 24982747 | 24983428 | 682 SAT1_CF  | blue | na |
| chrUn | 24983441 | 24983948 | 508 SAT1_CF  | blue | na |
| chrUn | 24983979 | 24984990 | 1012 SAT1_CF | blue | na |
| chrUn | 24985057 | 24985526 | 470 SAT1_CF  | blue | na |
| chrUn | 24985553 | 24986773 | 1221 SAT1_CF | blue | na |
| chrUn | 24986787 | 24987279 | 493 SAT1_CF  | blue | na |
| chrUn | 24987290 | 24987972 | 683 SAT1_CF  | blue | na |
| chrUn | 24987984 | 24988537 | 554 SAT1_CF  | blue | na |

|       |          |          |              |      |    |
|-------|----------|----------|--------------|------|----|
| chrUn | 24988607 | 24990683 | 2077 SAT1_CF | blue | na |
| chrUn | 24990708 | 24990814 | 107 SAT1_CF  | blue | na |
| chrUn | 24990827 | 24991531 | 705 SAT1_CF  | blue | na |
| chrUn | 24991563 | 24992067 | 505 SAT1_CF  | blue | na |
| chrUn | 24992099 | 24993318 | 1220 SAT1_CF | blue | na |
| chrUn | 24993384 | 24993520 | 137 SAT1_CF  | blue | na |
| chrUn | 24993553 | 24994057 | 505 SAT1_CF  | blue | na |
| chrUn | 24994089 | 24994663 | 575 SAT1_CF  | blue | na |
| chrUn | 24994686 | 24994792 | 107 SAT1_CF  | blue | na |
| chrUn | 24994805 | 24995287 | 483 SAT1_CF  | blue | na |
| chrUn | 24995352 | 24996266 | 915 SAT1_CF  | blue | na |
| chrUn | 24996345 | 24997306 | 962 SAT1_CF  | blue | na |
| chrUn | 24997349 | 24998717 | 1369 SAT1_CF | blue | na |
| chrUn | 24998730 | 25000159 | 1430 SAT1_CF | blue | na |
| chrUn | 25000205 | 25004890 | 4686 SAT1_CF | blue | na |
| chrUn | 25004903 | 25005403 | 501 SAT1_CF  | blue | na |
| chrUn | 25005445 | 25008235 | 2791 SAT1_CF | blue | na |
| chrUn | 25008249 | 25009253 | 1005 SAT1_CF | blue | na |
| chrUn | 25009340 | 25011295 | 1956 SAT1_CF | blue | na |
| chrUn | 25011338 | 25012997 | 1660 SAT1_CF | blue | na |
| chrUn | 25013010 | 25013529 | 520 SAT1_CF  | blue | na |
| chrUn | 25013553 | 25013951 | 399 SAT1_CF  | blue | na |
| chrUn | 25013962 | 25014509 | 548 SAT1_CF  | blue | na |
| chrUn | 25014553 | 25015550 | 998 SAT1_CF  | blue | na |
| chrUn | 25015593 | 25016831 | 1239 SAT1_CF | blue | na |
| chrUn | 25016860 | 25017718 | 859 SAT1_CF  | blue | na |
| chrUn | 25017771 | 25018090 | 320 SAT1_CF  | blue | na |
| chrUn | 25018102 | 25018681 | 580 SAT1_CF  | blue | na |
| chrUn | 25018760 | 25019726 | 967 SAT1_CF  | blue | na |
| chrUn | 25019769 | 25020440 | 672 SAT1_CF  | blue | na |
| chrUn | 25020452 | 25021461 | 1010 SAT1_CF | blue | na |
| chrUn | 25021508 | 25021642 | 135 SAT1_CF  | blue | na |
| chrUn | 25021678 | 25022290 | 613 SAT1_CF  | blue | na |
| chrUn | 25022308 | 25023303 | 996 SAT1_CF  | blue | na |
| chrUn | 25023326 | 25023868 | 543 SAT1_CF  | blue | na |
| chrUn | 25023890 | 25023997 | 108 SAT1_CF  | blue | na |
| chrUn | 25024011 | 25024627 | 617 SAT1_CF  | blue | na |
| chrUn | 25024733 | 25025618 | 886 SAT1_CF  | blue | na |
| chrUn | 25025809 | 25026653 | 845 SAT1_CF  | blue | na |
| chrUn | 25026695 | 25027913 | 1219 SAT1_CF | blue | na |
| chrUn | 25027957 | 25029286 | 1330 SAT1_CF | blue | na |
| chrUn | 25029298 | 25029780 | 483 SAT1_CF  | blue | na |

|       |          |          |              |        |    |
|-------|----------|----------|--------------|--------|----|
| chrUn | 25029798 | 25030421 | 624 SAT1_CF  | blue   | na |
| chrUn | 25030464 | 25031429 | 966 SAT1_CF  | blue   | na |
| chrUn | 25031472 | 25032586 | 1115 SAT1_CF | blue   | na |
| chrUn | 25033991 | 25034515 | 525 SAT1_CF  | blue   | na |
| chrUn | 25034529 | 25036298 | 1770 SAT1_CF | blue   | na |
| chrUn | 25036320 | 25036820 | 501 SAT1_CF  | blue   | na |
| chrUn | 25036865 | 25037022 | 158 SAT1_CF  | blue   | na |
| chrUn | 25037042 | 25037945 | 904 SAT1_CF  | blue   | na |
| chrUn | 25037988 | 25039192 | 1205 SAT1_CF | blue   | na |
| chrUn | 25039212 | 25039321 | 110 SAT1_CF  | blue   | na |
| chrUn | 25039333 | 25040531 | 1199 SAT1_CF | blue   | na |
| chrUn | 25040571 | 25041136 | 566 SAT1_CF  | blue   | na |
| chrUn | 25041154 | 25041838 | 685 SAT1_CF  | blue   | na |
| chrUn | 25041854 | 25043463 | 1610 SAT1_CF | blue   | na |
| chrUn | 25043476 | 25043996 | 521 SAT1_CF  | blue   | na |
| chrUn | 25044017 | 25046053 | 2037 SAT1_CF | blue   | na |
| chrUn | 25046095 | 25046772 | 678 SAT1_CF  | blue   | na |
| chrUn | 25046784 | 25048160 | 1377 SAT1_CF | blue   | na |
| chrUn | 25048180 | 25048674 | 495 SAT1_CF  | blue   | na |
| chrUn | 25048714 | 25049283 | 570 SAT1_CF  | blue   | na |
| chrUn | 25049327 | 25049892 | 566 CarSat1  | red    | na |
| chrUn | 25050100 | 25050227 | 128 Carsat2  | orange | na |
| chrUn | 25050117 | 25050608 | 492 CarSat1  | red    | na |
| chrUn | 25050633 | 25051372 | 740 CarSat1  | red    | na |
| chrUn | 25051624 | 25052174 | 551 CarSat1  | red    | na |
| chrUn | 25052217 | 25052713 | 497 CarSat1  | red    | na |
| chrUn | 25052738 | 25053451 | 714 CarSat1  | red    | na |
| chrUn | 25053476 | 25054819 | 1344 CarSat1 | red    | na |
| chrUn | 25054844 | 25055556 | 713 CarSat1  | red    | na |
| chrUn | 25055581 | 25057408 | 1828 CarSat1 | red    | na |
| chrUn | 25057452 | 25058915 | 1464 CarSat1 | red    | na |
| chrUn | 25058942 | 25060852 | 1911 CarSat1 | red    | na |
| chrUn | 25060867 | 25060993 | 127 Carsat2  | orange | na |
| chrUn | 25060882 | 25066010 | 5129 CarSat1 | red    | na |
| chrUn | 25066026 | 25066152 | 127 Carsat2  | orange | na |
| chrUn | 25066040 | 25066529 | 490 CarSat1  | red    | na |
| chrUn | 25066546 | 25067266 | 721 CarSat1  | red    | na |
| chrUn | 25067291 | 25068634 | 1344 CarSat1 | red    | na |
| chrUn | 25068659 | 25070102 | 1444 CarSat1 | red    | na |
| chrUn | 25070119 | 25070837 | 719 CarSat1  | red    | na |
| chrUn | 25070862 | 25071572 | 711 CarSat1  | red    | na |
| chrUn | 25071597 | 25072521 | 925 CarSat1  | red    | na |

|       |          |          |      |         |        |    |
|-------|----------|----------|------|---------|--------|----|
| chrUn | 25072536 | 25072663 | 128  | Carsat2 | orange | na |
| chrUn | 25072551 | 25073040 | 490  | CarSat1 | red    | na |
| chrUn | 25073056 | 25073772 | 717  | CarSat1 | red    | na |
| chrUn | 25073789 | 25074506 | 718  | CarSat1 | red    | na |
| chrUn | 25074531 | 25075241 | 711  | CarSat1 | red    | na |
| chrUn | 25075266 | 25076305 | 1040 | CarSat1 | red    | na |
| chrUn | 25076653 | 25077452 | 800  | CarSat1 | red    | na |
| chrUn | 25077477 | 25078259 | 783  | CarSat1 | red    | na |
| chrUn | 25078560 | 25078744 | 185  | Carsat2 | orange | na |
| chrUn | 25078596 | 25079305 | 710  | CarSat1 | red    | na |
| chrUn | 25079332 | 25081337 | 2006 | CarSat1 | red    | na |
| chrUn | 25082388 | 25084558 | 2171 | CarSat1 | red    | na |
| chrUn | 25084572 | 25091075 | 6504 | CarSat1 | red    | na |
| chrUn | 25091108 | 25091810 | 703  | CarSat1 | red    | na |
| chrUn | 25091834 | 25093775 | 1942 | CarSat1 | red    | na |
| chrUn | 25093797 | 25094757 | 961  | CarSat1 | red    | na |
| chrUn | 25094781 | 25096231 | 1451 | CarSat1 | red    | na |
| chrUn | 25096255 | 25099670 | 3416 | CarSat1 | red    | na |
| chrUn | 25099691 | 25100881 | 1191 | CarSat1 | red    | na |
| chrUn | 25100896 | 25101023 | 128  | Carsat2 | orange | na |
| chrUn | 25100911 | 25103363 | 2453 | CarSat1 | red    | na |
| chrUn | 25103390 | 25104100 | 711  | CarSat1 | red    | na |
| chrUn | 25104127 | 25104839 | 713  | CarSat1 | red    | na |
| chrUn | 25104864 | 25108472 | 3609 | CarSat1 | red    | na |
| chrUn | 25108797 | 25109265 | 469  | CarSat1 | red    | na |
| chrUn | 25109292 | 25110003 | 712  | CarSat1 | red    | na |
| chrUn | 25110030 | 25110738 | 709  | CarSat1 | red    | na |
| chrUn | 25110765 | 25111727 | 963  | CarSat1 | red    | na |
| chrUn | 25111743 | 25112211 | 469  | CarSat1 | red    | na |
| chrUn | 25112238 | 25112948 | 711  | CarSat1 | red    | na |
| chrUn | 25112975 | 25113684 | 710  | CarSat1 | red    | na |
| chrUn | 25113711 | 25114417 | 707  | CarSat1 | red    | na |
| chrUn | 25114444 | 25115155 | 712  | CarSat1 | red    | na |
| chrUn | 25115182 | 25116143 | 962  | CarSat1 | red    | na |
| chrUn | 25116159 | 25116879 | 721  | CarSat1 | red    | na |
| chrUn | 25116895 | 25117830 | 936  | CarSat1 | red    | na |
| chrUn | 25117860 | 25118568 | 709  | CarSat1 | red    | na |
| chrUn | 25118583 | 25118710 | 128  | Carsat2 | orange | na |
| chrUn | 25118599 | 25120315 | 1717 | CarSat1 | red    | na |
| chrUn | 25120342 | 25122445 | 2104 | CarSat1 | red    | na |
| chrUn | 25123477 | 25124036 | 560  | SAT1_CF | blue   | na |
| chrUn | 25124048 | 25127123 | 3076 | SAT1_CF | blue   | na |

|       |          |          |              |      |    |
|-------|----------|----------|--------------|------|----|
| chrUn | 25127210 | 25127711 | 502 SAT1_CF  | blue | na |
| chrUn | 25127725 | 25129280 | 1556 SAT1_CF | blue | na |
| chrUn | 25129298 | 25130656 | 1359 SAT1_CF | blue | na |
| chrUn | 25130701 | 25131664 | 964 SAT1_CF  | blue | na |
| chrUn | 25131744 | 25132670 | 927 SAT1_CF  | blue | na |
| chrUn | 25132706 | 25133206 | 501 SAT1_CF  | blue | na |
| chrUn | 25133224 | 25134271 | 1048 SAT1_CF | blue | na |
| chrUn | 25134292 | 25134834 | 543 SAT1_CF  | blue | na |
| chrUn | 25134904 | 25136296 | 1393 SAT1_CF | blue | na |
| chrUn | 25136956 | 25137043 | 88 SAT1_CF   | blue | na |
| chrUn | 25137058 | 25138380 | 1323 SAT1_CF | blue | na |
| chrUn | 25138430 | 25139129 | 700 SAT1_CF  | blue | na |
| chrUn | 25139180 | 25139921 | 742 SAT1_CF  | blue | na |
| chrUn | 25139950 | 25141207 | 1258 SAT1_CF | blue | na |
| chrUn | 25141232 | 25142109 | 878 SAT1_CF  | blue | na |
| chrUn | 25142120 | 25142474 | 355 SAT1_CF  | blue | na |
| chrUn | 25142561 | 25143062 | 502 SAT1_CF  | blue | na |
| chrUn | 25143075 | 25144298 | 1224 SAT1_CF | blue | na |
| chrUn | 25144310 | 25146039 | 1730 SAT1_CF | blue | na |
| chrUn | 25146051 | 25146356 | 306 SAT1_CF  | blue | na |
| chrUn | 25146678 | 25146948 | 271 SAT1_CF  | blue | na |
| chrUn | 25146975 | 25147939 | 965 SAT1_CF  | blue | na |
| chrUn | 25147951 | 25148623 | 673 SAT1_CF  | blue | na |
| chrUn | 25148637 | 25148772 | 136 SAT1_CF  | blue | na |
| chrUn | 25148814 | 25149354 | 541 SAT1_CF  | blue | na |
| chrUn | 25149433 | 25149924 | 492 SAT1_CF  | blue | na |
| chrUn | 25152918 | 25153347 | 430 SAT1_CF  | blue | na |
| chrUn | 25153364 | 25153875 | 512 SAT1_CF  | blue | na |
| chrUn | 25153955 | 25154536 | 582 SAT1_CF  | blue | na |
| chrUn | 25154548 | 25155404 | 857 SAT1_CF  | blue | na |
| chrUn | 25155484 | 25156673 | 1190 SAT1_CF | blue | na |
| chrUn | 25156716 | 25157216 | 501 SAT1_CF  | blue | na |
| chrUn | 25157229 | 25158067 | 839 SAT1_CF  | blue | na |
| chrUn | 25158079 | 25158750 | 672 SAT1_CF  | blue | na |
| chrUn | 25158796 | 25159445 | 650 SAT1_CF  | blue | na |
| chrUn | 25159465 | 25159948 | 484 SAT1_CF  | blue | na |
| chrUn | 25159960 | 25160644 | 685 SAT1_CF  | blue | na |
| chrUn | 25160662 | 25161332 | 671 SAT1_CF  | blue | na |
| chrUn | 25161375 | 25162487 | 1113 SAT1_CF | blue | na |
| chrUn | 25162530 | 25163113 | 584 SAT1_CF  | blue | na |
| chrUn | 25163125 | 25164639 | 1515 SAT1_CF | blue | na |
| chrUn | 25164681 | 25165452 | 772 SAT1_CF  | blue | na |

|       |          |          |              |      |    |
|-------|----------|----------|--------------|------|----|
| chrUn | 25165593 | 25166530 | 938 SAT1_CF  | blue | na |
| chrUn | 25166568 | 25169334 | 2767 SAT1_CF | blue | na |
| chrUn | 25169404 | 25170651 | 1248 SAT1_CF | blue | na |
| chrUn | 25170662 | 25171153 | 492 SAT1_CF  | blue | na |
| chrUn | 25171167 | 25172380 | 1214 SAT1_CF | blue | na |
| chrUn | 25172391 | 25172881 | 491 SAT1_CF  | blue | na |
| chrUn | 25172920 | 25173741 | 822 SAT1_CF  | blue | na |
| chrUn | 25173756 | 25174456 | 701 SAT1_CF  | blue | na |
| chrUn | 25174469 | 25175069 | 601 SAT1_CF  | blue | na |
| chrUn | 25175081 | 25175755 | 675 SAT1_CF  | blue | na |
| chrUn | 25175798 | 25177130 | 1333 SAT1_CF | blue | na |
| chrUn | 25177147 | 25177317 | 171 SAT1_CF  | blue | na |
| chrUn | 25178700 | 25179231 | 532 SAT1_CF  | blue | na |
| chrUn | 25179299 | 25179820 | 522 SAT1_CF  | blue | na |
| chrUn | 25179833 | 25180811 | 979 SAT1_CF  | blue | na |
| chrUn | 25180823 | 25183498 | 2676 SAT1_CF | blue | na |
| chrUn | 25183525 | 25184163 | 639 SAT1_CF  | blue | na |
| chrUn | 25184185 | 25184730 | 546 SAT1_CF  | blue | na |
| chrUn | 25184772 | 25185735 | 964 SAT1_CF  | blue | na |
| chrUn | 25185790 | 25187062 | 1273 SAT1_CF | blue | na |
| chrUn | 25187074 | 25187930 | 857 SAT1_CF  | blue | na |
| chrUn | 25187975 | 25190336 | 2362 SAT1_CF | blue | na |
| chrUn | 25190348 | 25191239 | 892 SAT1_CF  | blue | na |
| chrUn | 25191266 | 25191713 | 448 SAT1_CF  | blue | na |
| chrUn | 25191733 | 25192216 | 484 SAT1_CF  | blue | na |
| chrUn | 25192228 | 25192912 | 685 SAT1_CF  | blue | na |
| chrUn | 25192930 | 25193600 | 671 SAT1_CF  | blue | na |
| chrUn | 25193643 | 25194599 | 957 SAT1_CF  | blue | na |
| chrUn | 25194666 | 25194727 | 62 SAT1_CF   | blue | na |
| chrUn | 25194740 | 25195675 | 936 SAT1_CF  | blue | na |
| chrUn | 25195715 | 25196934 | 1220 SAT1_CF | blue | na |
| chrUn | 25196966 | 25197487 | 522 SAT1_CF  | blue | na |
| chrUn | 25197502 | 25197659 | 158 SAT1_CF  | blue | na |
| chrUn | 25197685 | 25200424 | 2740 SAT1_CF | blue | na |
| chrUn | 25200494 | 25200806 | 313 SAT1_CF  | blue | na |
| chrUn | 25205074 | 25205823 | 750 SAT1_CF  | blue | na |
| chrUn | 25205835 | 25207141 | 1307 SAT1_CF | blue | na |
| chrUn | 25207172 | 25207501 | 330 SAT1_CF  | blue | na |
| chrUn | 25207577 | 25208774 | 1198 SAT1_CF | blue | na |
| chrUn | 25208786 | 25209454 | 669 SAT1_CF  | blue | na |
| chrUn | 25209497 | 25211462 | 1966 SAT1_CF | blue | na |
| chrUn | 25211522 | 25212003 | 482 SAT1_CF  | blue | na |

|       |          |          |              |      |    |
|-------|----------|----------|--------------|------|----|
| chrUn | 25212015 | 25212670 | 656 SAT1_CF  | blue | na |
| chrUn | 25212727 | 25213273 | 547 SAT1_CF  | blue | na |
| chrUn | 25213286 | 25213931 | 646 SAT1_CF  | blue | na |
| chrUn | 25213975 | 25215113 | 1139 SAT1_CF | blue | na |
| chrUn | 25215160 | 25215681 | 522 SAT1_CF  | blue | na |
| chrUn | 25215708 | 25216300 | 593 SAT1_CF  | blue | na |
| chrUn | 25216312 | 25218032 | 1721 SAT1_CF | blue | na |
| chrUn | 25218064 | 25219066 | 1003 SAT1_CF | blue | na |
| chrUn | 25219095 | 25219613 | 519 SAT1_CF  | blue | na |
| chrUn | 25219625 | 25220486 | 862 SAT1_CF  | blue | na |
| chrUn | 25220528 | 25224905 | 4378 SAT1_CF | blue | na |
| chrUn | 25224945 | 25225447 | 503 SAT1_CF  | blue | na |
| chrUn | 25225471 | 25226429 | 959 SAT1_CF  | blue | na |
| chrUn | 25226474 | 25227503 | 1030 SAT1_CF | blue | na |
| chrUn | 25227524 | 25228133 | 610 SAT1_CF  | blue | na |
| chrUn | 25228186 | 25228704 | 519 SAT1_CF  | blue | na |
| chrUn | 25228747 | 25229708 | 962 SAT1_CF  | blue | na |
| chrUn | 25229787 | 25230331 | 545 SAT1_CF  | blue | na |
| chrUn | 25230345 | 25230747 | 403 SAT1_CF  | blue | na |
| chrUn | 25230807 | 25231288 | 482 SAT1_CF  | blue | na |
| chrUn | 25231315 | 25232097 | 783 SAT1_CF  | blue | na |
| chrUn | 25232120 | 25232665 | 546 SAT1_CF  | blue | na |
| chrUn | 25232707 | 25233690 | 984 SAT1_CF  | blue | na |
| chrUn | 25233716 | 25234572 | 857 SAT1_CF  | blue | na |
| chrUn | 25234584 | 25235474 | 891 SAT1_CF  | blue | na |
| chrUn | 25235487 | 25236851 | 1365 SAT1_CF | blue | na |
| chrUn | 25236898 | 25238523 | 1626 SAT1_CF | blue | na |
| chrUn | 25238602 | 25239141 | 540 SAT1_CF  | blue | na |
| chrUn | 25239217 | 25239717 | 501 SAT1_CF  | blue | na |
| chrUn | 25239738 | 25240414 | 677 SAT1_CF  | blue | na |
| chrUn | 25240426 | 25241108 | 683 SAT1_CF  | blue | na |
| chrUn | 25241119 | 25241605 | 487 SAT1_CF  | blue | na |
| chrUn | 25241625 | 25241936 | 312 SAT1_CF  | blue | na |
| chrUn | 25241989 | 25242484 | 496 SAT1_CF  | blue | na |
| chrUn | 25242499 | 25242579 | 81 SAT1_CF   | blue | na |
| chrUn | 25242633 | 25243151 | 519 SAT1_CF  | blue | na |
| chrUn | 25243194 | 25245197 | 2004 SAT1_CF | blue | na |
| chrUn | 25245237 | 25245739 | 503 SAT1_CF  | blue | na |
| chrUn | 25245752 | 25246546 | 795 SAT1_CF  | blue | na |
| chrUn | 25246558 | 25247239 | 682 SAT1_CF  | blue | na |
| chrUn | 25247255 | 25248471 | 1217 SAT1_CF | blue | na |
| chrUn | 25248483 | 25248555 | 73 SAT1_CF   | blue | na |



|       |          |          |              |      |    |
|-------|----------|----------|--------------|------|----|
| chrUn | 25248577 | 25249130 | 554 SAT1_CF  | blue | na |
| chrUn | 25249142 | 25250739 | 1598 SAT1_CF | blue | na |
| chrUn | 25250751 | 25251527 | 777 SAT1_CF  | blue | na |
| chrUn | 25251548 | 25252484 | 937 SAT1_CF  | blue | na |
| chrUn | 25252499 | 25252656 | 158 SAT1_CF  | blue | na |
| chrUn | 25252700 | 25253204 | 505 SAT1_CF  | blue | na |
| chrUn | 25253226 | 25253901 | 676 SAT1_CF  | blue | na |
| chrUn | 25253919 | 25254587 | 669 SAT1_CF  | blue | na |
| chrUn | 25254636 | 25255238 | 603 SAT1_CF  | blue | na |
| chrUn | 25255281 | 25255843 | 563 SAT1_CF  | blue | na |
| chrUn | 25255922 | 25256446 | 525 SAT1_CF  | blue | na |
| chrUn | 25256500 | 25256578 | 79 SAT1_CF   | blue | na |
| chrUn | 25256636 | 25257649 | 1014 SAT1_CF | blue | na |
| chrUn | 25257661 | 25259335 | 1675 SAT1_CF | blue | na |
| chrUn | 25259476 | 25259999 | 524 SAT1_CF  | blue | na |
| chrUn | 25260101 | 25260258 | 158 SAT1_CF  | blue | na |
| chrUn | 25260286 | 25261520 | 1235 SAT1_CF | blue | na |
| chrUn | 25261552 | 25264654 | 3103 SAT1_CF | blue | na |
| chrUn | 25264724 | 25265749 | 1026 SAT1_CF | blue | na |
| chrUn | 25265761 | 25267095 | 1335 SAT1_CF | blue | na |
| chrUn | 25267139 | 25268516 | 1378 SAT1_CF | blue | na |
| chrUn | 25268545 | 25269063 | 519 SAT1_CF  | blue | na |
| chrUn | 25269075 | 25269936 | 862 SAT1_CF  | blue | na |
| chrUn | 25269978 | 25272273 | 2296 SAT1_CF | blue | na |
| chrUn | 25272285 | 25273174 | 890 SAT1_CF  | blue | na |
| chrUn | 25273187 | 25274521 | 1335 SAT1_CF | blue | na |
| chrUn | 25274563 | 25275101 | 539 SAT1_CF  | blue | na |
| chrUn | 25275117 | 25276468 | 1352 SAT1_CF | blue | na |
| chrUn | 25276523 | 25277023 | 501 SAT1_CF  | blue | na |
| chrUn | 25277035 | 25277110 | 76 SAT1_CF   | blue | na |
| chrUn | 25277166 | 25278584 | 1419 SAT1_CF | blue | na |
| chrUn | 25278626 | 25279168 | 543 SAT1_CF  | blue | na |
| chrUn | 25279206 | 25280032 | 827 SAT1_CF  | blue | na |
| chrUn | 25280061 | 25280430 | 370 SAT1_CF  | blue | na |
| chrUn | 25280470 | 25280970 | 501 SAT1_CF  | blue | na |
| chrUn | 25280983 | 25281664 | 682 SAT1_CF  | blue | na |
| chrUn | 25281676 | 25281785 | 110 SAT1_CF  | blue | na |
| chrUn | 25281805 | 25282898 | 1094 SAT1_CF | blue | na |
| chrUn | 25282966 | 25283888 | 923 SAT1_CF  | blue | na |
| chrUn | 25283922 | 25285634 | 1713 SAT1_CF | blue | na |
| chrUn | 25285647 | 25286537 | 891 SAT1_CF  | blue | na |
| chrUn | 25286552 | 25288071 | 1520 SAT1_CF | blue | na |

|       |          |          |              |      |    |
|-------|----------|----------|--------------|------|----|
| chrUn | 25288099 | 25288608 | 510 SAT1_CF  | blue | na |
| chrUn | 25288645 | 25291805 | 3161 SAT1_CF | blue | na |
| chrUn | 25291848 | 25292961 | 1114 SAT1_CF | blue | na |
| chrUn | 25293004 | 25293588 | 585 SAT1_CF  | blue | na |
| chrUn | 25293600 | 25296058 | 2459 SAT1_CF | blue | na |
| chrUn | 25296069 | 25297080 | 1012 SAT1_CF | blue | na |
| chrUn | 25297131 | 25297268 | 138 SAT1_CF  | blue | na |
| chrUn | 25297315 | 25297906 | 592 SAT1_CF  | blue | na |
| chrUn | 25297976 | 25299044 | 1069 SAT1_CF | blue | na |
| chrUn | 25299065 | 25299570 | 506 SAT1_CF  | blue | na |
| chrUn | 25299604 | 25300985 | 1382 SAT1_CF | blue | na |
| chrUn | 25300997 | 25301888 | 892 SAT1_CF  | blue | na |
| chrUn | 25301911 | 25302582 | 672 SAT1_CF  | blue | na |
| chrUn | 25302594 | 25303451 | 858 SAT1_CF  | blue | na |
| chrUn | 25303528 | 25305349 | 1822 SAT1_CF | blue | na |
| chrUn | 25305389 | 25305885 | 497 SAT1_CF  | blue | na |
| chrUn | 25305898 | 25306581 | 684 SAT1_CF  | blue | na |
| chrUn | 25306592 | 25308975 | 2384 SAT1_CF | blue | na |
| chrUn | 25308991 | 25312077 | 3087 SAT1_CF | blue | na |
| chrUn | 25312159 | 25312666 | 508 SAT1_CF  | blue | na |
| chrUn | 25312693 | 25313362 | 670 SAT1_CF  | blue | na |
| chrUn | 25313374 | 25314056 | 683 SAT1_CF  | blue | na |
| chrUn | 25314067 | 25314485 | 419 SAT1_CF  | blue | na |
| chrUn | 25314499 | 25316707 | 2209 SAT1_CF | blue | na |
| chrUn | 25317799 | 25318430 | 632 SAT1_CF  | blue | na |
| chrUn | 25318442 | 25319117 | 676 SAT1_CF  | blue | na |
| chrUn | 25319160 | 25320380 | 1221 SAT1_CF | blue | na |
| chrUn | 25321747 | 25321925 | 179 SAT1_CF  | blue | na |
| chrUn | 25321942 | 25322494 | 553 SAT1_CF  | blue | na |
| chrUn | 25322506 | 25324310 | 1805 SAT1_CF | blue | na |
| chrUn | 25324328 | 25324852 | 525 SAT1_CF  | blue | na |
| chrUn | 25325014 | 25325346 | 333 SAT1_CF  | blue | na |
| chrUn | 25325423 | 25325964 | 542 SAT1_CF  | blue | na |
| chrUn | 25326054 | 25326724 | 671 SAT1_CF  | blue | na |
| chrUn | 25326842 | 25327398 | 557 SAT1_CF  | blue | na |
| chrUn | 25329210 | 25329679 | 470 SAT1_CF  | blue | na |
| chrUn | 25329692 | 25331530 | 1839 SAT1_CF | blue | na |
| chrUn | 25331564 | 25332085 | 522 SAT1_CF  | blue | na |
| chrUn | 25332098 | 25332704 | 607 SAT1_CF  | blue | na |
| chrUn | 25332716 | 25332825 | 110 SAT1_CF  | blue | na |
| chrUn | 25332845 | 25333390 | 546 SAT1_CF  | blue | na |
| chrUn | 25333403 | 25335203 | 1801 SAT1_CF | blue | na |

|       |          |          |              |      |    |
|-------|----------|----------|--------------|------|----|
| chrUn | 25335237 | 25337193 | 1957 SAT1_CF | blue | na |
| chrUn | 25337272 | 25337814 | 543 SAT1_CF  | blue | na |
| chrUn | 25337865 | 25338264 | 400 SAT1_CF  | blue | na |
| chrUn | 25338285 | 25338803 | 519 SAT1_CF  | blue | na |
| chrUn | 25338816 | 25339498 | 683 SAT1_CF  | blue | na |
| chrUn | 25339522 | 25340187 | 666 SAT1_CF  | blue | na |
| chrUn | 25340231 | 25341215 | 985 SAT1_CF  | blue | na |
| chrUn | 25341293 | 25341849 | 557 SAT1_CF  | blue | na |
| chrUn | 25341883 | 25342117 | 235 SAT1_CF  | blue | na |
| chrUn | 25342136 | 25342645 | 510 SAT1_CF  | blue | na |
| chrUn | 25342658 | 25343341 | 684 SAT1_CF  | blue | na |
| chrUn | 25343353 | 25344026 | 674 SAT1_CF  | blue | na |
| chrUn | 25344047 | 25344687 | 641 SAT1_CF  | blue | na |
| chrUn | 25344731 | 25345293 | 563 SAT1_CF  | blue | na |
| chrUn | 25345373 | 25345883 | 511 SAT1_CF  | blue | na |
| chrUn | 25345912 | 25346042 | 131 SAT1_CF  | blue | na |
| chrUn | 25346100 | 25346600 | 501 SAT1_CF  | blue | na |
| chrUn | 25346613 | 25347296 | 684 SAT1_CF  | blue | na |
| chrUn | 25347308 | 25347984 | 677 SAT1_CF  | blue | na |
| chrUn | 25348027 | 25348656 | 630 SAT1_CF  | blue | na |
| chrUn | 25348759 | 25349280 | 522 SAT1_CF  | blue | na |
| chrUn | 25349366 | 25349889 | 524 SAT1_CF  | blue | na |
| chrUn | 25349904 | 25350061 | 158 SAT1_CF  | blue | na |
| chrUn | 25350106 | 25350576 | 471 SAT1_CF  | blue | na |
| chrUn | 25351589 | 25351862 | 274 SAT1_CF  | blue | na |
| chrUn | 25351873 | 25353020 | 1148 SAT1_CF | blue | na |
| chrUn | 25353031 | 25353836 | 806 SAT1_CF  | blue | na |
| chrUn | 25353859 | 25354404 | 546 SAT1_CF  | blue | na |
| chrUn | 25354484 | 25354846 | 363 SAT1_CF  | blue | na |
| chrUn | 25354915 | 25355393 | 479 SAT1_CF  | blue | na |
| chrUn | 25355405 | 25356089 | 685 SAT1_CF  | blue | na |
| chrUn | 25356140 | 25356671 | 532 SAT1_CF  | blue | na |
| chrUn | 25356721 | 25357386 | 666 SAT1_CF  | blue | na |
| chrUn | 25357467 | 25358009 | 543 SAT1_CF  | blue | na |
| chrUn | 25358022 | 25358887 | 866 SAT1_CF  | blue | na |
| chrUn | 25359809 | 25360852 | 1044 SAT1_CF | blue | na |
| chrUn | 25360865 | 25361646 | 782 SAT1_CF  | blue | na |
| chrUn | 25361658 | 25362334 | 677 SAT1_CF  | blue | na |
| chrUn | 25362431 | 25363156 | 726 SAT1_CF  | blue | na |
| chrUn | 25363226 | 25364644 | 1419 SAT1_CF | blue | na |
| chrUn | 25364688 | 25365929 | 1242 SAT1_CF | blue | na |
| chrUn | 25365971 | 25367167 | 1197 SAT1_CF | blue | na |

|       |          |          |      |         |      |    |
|-------|----------|----------|------|---------|------|----|
| chrUn | 25367224 | 25367705 | 482  | SAT1_CF | blue | na |
| chrUn | 25367723 | 25368789 | 1067 | SAT1_CF | blue | na |
| chrUn | 25368815 | 25369294 | 480  | SAT1_CF | blue | na |
| chrUn | 25369329 | 25371475 | 2147 | SAT1_CF | blue | na |
| chrUn | 25371515 | 25372008 | 494  | SAT1_CF | blue | na |
| chrUn | 25372019 | 25373442 | 1424 | SAT1_CF | blue | na |
| chrUn | 25373464 | 25375355 | 1892 | SAT1_CF | blue | na |
| chrUn | 25375398 | 25376028 | 631  | SAT1_CF | blue | na |
| chrUn | 25376056 | 25376717 | 662  | SAT1_CF | blue | na |
| chrUn | 25376738 | 25377282 | 545  | SAT1_CF | blue | na |
| chrUn | 25377312 | 25377468 | 157  | SAT1_CF | blue | na |
| chrUn | 25377494 | 25378014 | 521  | SAT1_CF | blue | na |
| chrUn | 25378027 | 25380395 | 2369 | SAT1_CF | blue | na |
| chrUn | 25380409 | 25380953 | 545  | SAT1_CF | blue | na |
| chrUn | 25381060 | 25381152 | 93   | SAT1_CF | blue | na |
| chrUn | 25381182 | 25381562 | 381  | SAT1_CF | blue | na |
| chrUn | 25381583 | 25382102 | 520  | SAT1_CF | blue | na |
| chrUn | 25382114 | 25382223 | 110  | SAT1_CF | blue | na |
| chrUn | 25382244 | 25382875 | 632  | SAT1_CF | blue | na |
| chrUn | 25382887 | 25383554 | 668  | SAT1_CF | blue | na |
| chrUn | 25383611 | 25384156 | 546  | SAT1_CF | blue | na |
| chrUn | 25384199 | 25384740 | 542  | SAT1_CF | blue | na |
| chrUn | 25384762 | 25384858 | 97   | SAT1_CF | blue | na |
| chrUn | 25384879 | 25385433 | 555  | SAT1_CF | blue | na |
| chrUn | 25385445 | 25386307 | 863  | SAT1_CF | blue | na |
| chrUn | 25386349 | 25387131 | 783  | SAT1_CF | blue | na |
| chrUn | 25387200 | 25387717 | 518  | SAT1_CF | blue | na |
| chrUn | 25387782 | 25388340 | 559  | SAT1_CF | blue | na |
| chrUn | 25388362 | 25389346 | 985  | SAT1_CF | blue | na |
| chrUn | 25389389 | 25390460 | 1072 | SAT1_CF | blue | na |
| chrUn | 25390494 | 25391424 | 931  | SAT1_CF | blue | na |
| chrUn | 25391464 | 25391966 | 503  | SAT1_CF | blue | na |
| chrUn | 25391992 | 25394236 | 2245 | SAT1_CF | blue | na |
| chrUn | 25394254 | 25395016 | 763  | SAT1_CF | blue | na |
| chrUn | 25395028 | 25395702 | 675  | SAT1_CF | blue | na |
| chrUn | 25395767 | 25396253 | 487  | SAT1_CF | blue | na |
| chrUn | 25396306 | 25396808 | 503  | SAT1_CF | blue | na |
| chrUn | 25396825 | 25396928 | 104  | SAT1_CF | blue | na |
| chrUn | 25396950 | 25398846 | 1897 | SAT1_CF | blue | na |
| chrUn | 25398870 | 25399719 | 850  | SAT1_CF | blue | na |
| chrUn | 25399730 | 25399805 | 76   | SAT1_CF | blue | na |
| chrUn | 25399862 | 25400789 | 928  | SAT1_CF | blue | na |

|       |          |          |              |      |    |
|-------|----------|----------|--------------|------|----|
| chrUn | 25400817 | 25401341 | 525 SAT1_CF  | blue | na |
| chrUn | 25401356 | 25401485 | 130 SAT1_CF  | blue | na |
| chrUn | 25401557 | 25402059 | 503 SAT1_CF  | blue | na |
| chrUn | 25402204 | 25403586 | 1383 SAT1_CF | blue | na |
| chrUn | 25403657 | 25404409 | 753 SAT1_CF  | blue | na |
| chrUn | 25404488 | 25405036 | 549 SAT1_CF  | blue | na |
| chrUn | 25405048 | 25405448 | 401 SAT1_CF  | blue | na |
| chrUn | 25405467 | 25405986 | 520 SAT1_CF  | blue | na |
| chrUn | 25405999 | 25406688 | 690 SAT1_CF  | blue | na |
| chrUn | 25406700 | 25407525 | 826 SAT1_CF  | blue | na |
| chrUn | 25407538 | 25408397 | 860 SAT1_CF  | blue | na |
| chrUn | 25408439 | 25409218 | 780 SAT1_CF  | blue | na |
| chrUn | 25409272 | 25410292 | 1021 SAT1_CF | blue | na |
| chrUn | 25410351 | 25412023 | 1673 SAT1_CF | blue | na |
| chrUn | 25412067 | 25412684 | 618 SAT1_CF  | blue | na |
| chrUn | 25412697 | 25412851 | 155 SAT1_CF  | blue | na |
| chrUn | 25412898 | 25415214 | 2317 SAT1_CF | blue | na |
| chrUn | 25415227 | 25415729 | 503 SAT1_CF  | blue | na |
| chrUn | 25415756 | 25416423 | 668 SAT1_CF  | blue | na |
| chrUn | 25416447 | 25417296 | 850 SAT1_CF  | blue | na |
| chrUn | 25417367 | 25418227 | 861 SAT1_CF  | blue | na |
| chrUn | 25418261 | 25418782 | 522 SAT1_CF  | blue | na |
| chrUn | 25418793 | 25418980 | 188 SAT1_CF  | blue | na |
| chrUn | 25419032 | 25419515 | 484 SAT1_CF  | blue | na |
| chrUn | 25419527 | 25420828 | 1302 SAT1_CF | blue | na |
| chrUn | 25420856 | 25421013 | 158 SAT1_CF  | blue | na |
| chrUn | 25421077 | 25421555 | 479 SAT1_CF  | blue | na |
| chrUn | 25421568 | 25422250 | 683 SAT1_CF  | blue | na |
| chrUn | 25422262 | 25422939 | 678 SAT1_CF  | blue | na |
| chrUn | 25422982 | 25423943 | 962 SAT1_CF  | blue | na |
| chrUn | 25424010 | 25425542 | 1533 SAT1_CF | blue | na |
| chrUn | 25425620 | 25426168 | 549 SAT1_CF  | blue | na |
| chrUn | 25426179 | 25426580 | 402 SAT1_CF  | blue | na |
| chrUn | 25426602 | 25427241 | 640 SAT1_CF  | blue | na |
| chrUn | 25427264 | 25427896 | 633 SAT1_CF  | blue | na |
| chrUn | 25427908 | 25428575 | 668 SAT1_CF  | blue | na |
| chrUn | 25428632 | 25429177 | 546 SAT1_CF  | blue | na |
| chrUn | 25429220 | 25429763 | 544 SAT1_CF  | blue | na |
| chrUn | 25429776 | 25429928 | 153 SAT1_CF  | blue | na |
| chrUn | 25429954 | 25432427 | 2474 SAT1_CF | blue | na |
| chrUn | 25432439 | 25433224 | 786 SAT1_CF  | blue | na |
| chrUn | 25433247 | 25433795 | 549 SAT1_CF  | blue | na |

|       |          |          |              |      |    |
|-------|----------|----------|--------------|------|----|
| chrUn | 25433808 | 25434160 | 353 SAT1_CF  | blue | na |
| chrUn | 25434276 | 25434793 | 518 SAT1_CF  | blue | na |
| chrUn | 25434852 | 25435412 | 561 SAT1_CF  | blue | na |
| chrUn | 25435424 | 25436780 | 1357 SAT1_CF | blue | na |
| chrUn | 25436793 | 25437145 | 353 SAT1_CF  | blue | na |
| chrUn | 25437232 | 25437780 | 549 SAT1_CF  | blue | na |
| chrUn | 25437837 | 25438561 | 725 SAT1_CF  | blue | na |
| chrUn | 25438646 | 25439420 | 775 SAT1_CF  | blue | na |
| chrUn | 25439445 | 25440440 | 996 SAT1_CF  | blue | na |
| chrUn | 25440488 | 25441446 | 959 SAT1_CF  | blue | na |
| chrUn | 25441486 | 25441987 | 502 SAT1_CF  | blue | na |
| chrUn | 25442000 | 25442673 | 674 SAT1_CF  | blue | na |
| chrUn | 25442716 | 25443249 | 534 SAT1_CF  | blue | na |
| chrUn | 25443263 | 25445685 | 2423 SAT1_CF | blue | na |
| chrUn | 25445729 | 25445935 | 207 SAT1_CF  | blue | na |
| chrUn | 25446117 | 25446302 | 186 SAT1_CF  | blue | na |
| chrUn | 25446319 | 25446837 | 519 SAT1_CF  | blue | na |
| chrUn | 25446850 | 25446955 | 106 SAT1_CF  | blue | na |
| chrUn | 25446977 | 25448249 | 1273 SAT1_CF | blue | na |
| chrUn | 25448264 | 25448968 | 705 SAT1_CF  | blue | na |
| chrUn | 25448981 | 25449087 | 107 SAT1_CF  | blue | na |
| chrUn | 25449109 | 25449666 | 558 SAT1_CF  | blue | na |
| chrUn | 25449678 | 25450349 | 672 SAT1_CF  | blue | na |
| chrUn | 25450392 | 25451060 | 669 SAT1_CF  | blue | na |
| chrUn | 25451087 | 25452455 | 1369 SAT1_CF | blue | na |
| chrUn | 25452468 | 25452580 | 113 SAT1_CF  | blue | na |
| chrUn | 25452745 | 25453410 | 666 SAT1_CF  | blue | na |
| chrUn | 25453427 | 25454651 | 1225 SAT1_CF | blue | na |
| chrUn | 25454709 | 25456122 | 1414 SAT1_CF | blue | na |
| chrUn | 25456160 | 25457621 | 1462 SAT1_CF | blue | na |
| chrUn | 25457634 | 25458318 | 685 SAT1_CF  | blue | na |
| chrUn | 25458331 | 25459491 | 1161 SAT1_CF | blue | na |
| chrUn | 25459511 | 25460121 | 611 SAT1_CF  | blue | na |
| chrUn | 25460200 | 25460365 | 166 SAT1_CF  | blue | na |
| chrUn | 25460546 | 25460731 | 186 SAT1_CF  | blue | na |
| chrUn | 25460748 | 25461268 | 521 SAT1_CF  | blue | na |
| chrUn | 25461284 | 25461389 | 106 SAT1_CF  | blue | na |
| chrUn | 25461409 | 25461966 | 558 SAT1_CF  | blue | na |
| chrUn | 25461978 | 25463579 | 1602 SAT1_CF | blue | na |
| chrUn | 25463593 | 25464688 | 1096 SAT1_CF | blue | na |
| chrUn | 25464775 | 25465273 | 499 SAT1_CF  | blue | na |
| chrUn | 25465286 | 25465390 | 105 SAT1_CF  | blue | na |

|       |          |          |              |      |    |
|-------|----------|----------|--------------|------|----|
| chrUn | 25465415 | 25467429 | 2015 SAT1_CF | blue | na |
| chrUn | 25467472 | 25469056 | 1585 SAT1_CF | blue | na |
| chrUn | 25469069 | 25469465 | 397 SAT1_CF  | blue | na |
| chrUn | 25469513 | 25470011 | 499 SAT1_CF  | blue | na |
| chrUn | 25470024 | 25470706 | 683 SAT1_CF  | blue | na |
| chrUn | 25470718 | 25471393 | 676 SAT1_CF  | blue | na |
| chrUn | 25471437 | 25472398 | 962 SAT1_CF  | blue | na |
| chrUn | 25472448 | 25472740 | 293 SAT1_CF  | blue | na |
| chrUn | 25472771 | 25473281 | 511 SAT1_CF  | blue | na |
| chrUn | 25473309 | 25473445 | 137 SAT1_CF  | blue | na |
| chrUn | 25473511 | 25474011 | 501 SAT1_CF  | blue | na |
| chrUn | 25474024 | 25474324 | 301 SAT1_CF  | blue | na |
| chrUn | 25474336 | 25475966 | 1631 SAT1_CF | blue | na |
| chrUn | 25476010 | 25476912 | 903 SAT1_CF  | blue | na |
| chrUn | 25476930 | 25477453 | 524 SAT1_CF  | blue | na |
| chrUn | 25477486 | 25477865 | 380 SAT1_CF  | blue | na |
| chrUn | 25477933 | 25478469 | 537 SAT1_CF  | blue | na |
| chrUn | 25478489 | 25478592 | 104 SAT1_CF  | blue | na |
| chrUn | 25478616 | 25479171 | 556 SAT1_CF  | blue | na |
| chrUn | 25479183 | 25480094 | 912 SAT1_CF  | blue | na |
| chrUn | 25480115 | 25481494 | 1380 SAT1_CF | blue | na |
| chrUn | 25481539 | 25483664 | 2126 SAT1_CF | blue | na |
| chrUn | 25483692 | 25484617 | 926 SAT1_CF  | blue | na |
| chrUn | 25484655 | 25485478 | 824 SAT1_CF  | blue | na |
| chrUn | 25485489 | 25486014 | 526 SAT1_CF  | blue | na |
| chrUn | 25486095 | 25488759 | 2665 SAT1_CF | blue | na |
| chrUn | 25491226 | 25491978 | 753 SAT1_CF  | blue | na |
| chrUn | 25492033 | 25492923 | 891 SAT1_CF  | blue | na |
| chrUn | 25492956 | 25493473 | 518 SAT1_CF  | blue | na |
| chrUn | 25493541 | 25494061 | 521 SAT1_CF  | blue | na |
| chrUn | 25494073 | 25494186 | 114 SAT1_CF  | blue | na |
| chrUn | 25494203 | 25494912 | 710 SAT1_CF  | blue | na |
| chrUn | 25494924 | 25495786 | 863 SAT1_CF  | blue | na |
| chrUn | 25495828 | 25497273 | 1446 SAT1_CF | blue | na |
| chrUn | 25497284 | 25497686 | 403 SAT1_CF  | blue | na |
| chrUn | 25497726 | 25498227 | 502 SAT1_CF  | blue | na |
| chrUn | 25498240 | 25499464 | 1225 SAT1_CF | blue | na |
| chrUn | 25499525 | 25499686 | 162 SAT1_CF  | blue | na |
| chrUn | 25499747 | 25500272 | 526 SAT1_CF  | blue | na |
| chrUn | 25500287 | 25500423 | 137 SAT1_CF  | blue | na |
| chrUn | 25500489 | 25500990 | 502 SAT1_CF  | blue | na |
| chrUn | 25501038 | 25501901 | 864 SAT1_CF  | blue | na |

|       |          |          |              |      |    |
|-------|----------|----------|--------------|------|----|
| chrUn | 25501943 | 25503753 | 1811 SAT1_CF | blue | na |
| chrUn | 25503821 | 25504341 | 521 SAT1_CF  | blue | na |
| chrUn | 25504353 | 25504466 | 114 SAT1_CF  | blue | na |
| chrUn | 25504483 | 25505192 | 710 SAT1_CF  | blue | na |
| chrUn | 25505204 | 25505881 | 678 SAT1_CF  | blue | na |
| chrUn | 25505924 | 25506465 | 542 SAT1_CF  | blue | na |
| chrUn | 25506479 | 25507553 | 1075 SAT1_CF | blue | na |
| chrUn | 25507564 | 25507966 | 403 SAT1_CF  | blue | na |
| chrUn | 25508006 | 25508507 | 502 SAT1_CF  | blue | na |
| chrUn | 25508520 | 25509744 | 1225 SAT1_CF | blue | na |
| chrUn | 25509805 | 25510552 | 748 SAT1_CF  | blue | na |
| chrUn | 25510567 | 25510703 | 137 SAT1_CF  | blue | na |
| chrUn | 25510789 | 25511270 | 482 SAT1_CF  | blue | na |
| chrUn | 25511297 | 25512044 | 748 SAT1_CF  | blue | na |
| chrUn | 25512057 | 25513388 | 1332 SAT1_CF | blue | na |
| chrUn | 25513431 | 25515477 | 2047 SAT1_CF | blue | na |
| chrUn | 25515489 | 25516008 | 520 SAT1_CF  | blue | na |
| chrUn | 25516021 | 25516702 | 682 SAT1_CF  | blue | na |
| chrUn | 25516713 | 25517336 | 624 SAT1_CF  | blue | na |
| chrUn | 25517379 | 25518900 | 1522 SAT1_CF | blue | na |
| chrUn | 25519082 | 25519307 | 226 SAT1_CF  | blue | na |
| chrUn | 25519329 | 25519995 | 667 SAT1_CF  | blue | na |
| chrUn | 25520038 | 25521039 | 1002 SAT1_CF | blue | na |
| chrUn | 25521071 | 25521592 | 522 SAT1_CF  | blue | na |
| chrUn | 25521605 | 25521743 | 139 SAT1_CF  | blue | na |
| chrUn | 25521917 | 25522033 | 117 SAT1_CF  | blue | na |
| chrUn | 25522078 | 25522580 | 503 SAT1_CF  | blue | na |
| chrUn | 25522607 | 25523267 | 661 SAT1_CF  | blue | na |
| chrUn | 25523310 | 25524898 | 1589 SAT1_CF | blue | na |
| chrUn | 25524914 | 25525313 | 400 SAT1_CF  | blue | na |
| chrUn | 25525373 | 25525854 | 482 SAT1_CF  | blue | na |
| chrUn | 25525866 | 25527199 | 1334 SAT1_CF | blue | na |
| chrUn | 25527224 | 25527548 | 325 SAT1_CF  | blue | na |
| chrUn | 25527627 | 25528174 | 548 SAT1_CF  | blue | na |
| chrUn | 25528218 | 25529496 | 1279 SAT1_CF | blue | na |
| chrUn | 25529537 | 25530355 | 819 SAT1_CF  | blue | na |
| chrUn | 25530368 | 25531205 | 838 SAT1_CF  | blue | na |
| chrUn | 25531223 | 25532964 | 1742 SAT1_CF | blue | na |
| chrUn | 25533007 | 25533380 | 374 SAT1_CF  | blue | na |
| chrUn | 25533397 | 25533917 | 521 SAT1_CF  | blue | na |
| chrUn | 25533930 | 25534633 | 704 SAT1_CF  | blue | na |
| chrUn | 25534645 | 25535322 | 678 SAT1_CF  | blue | na |



|       |          |          |              |      |    |
|-------|----------|----------|--------------|------|----|
| chrUn | 25535365 | 25537105 | 1741 SAT1_CF | blue | na |
| chrUn | 25537144 | 25538948 | 1805 SAT1_CF | blue | na |
| chrUn | 25538975 | 25539538 | 564 SAT1_CF  | blue | na |
| chrUn | 25539618 | 25540143 | 526 SAT1_CF  | blue | na |
| chrUn | 25540355 | 25540510 | 156 SAT1_CF  | blue | na |
| chrUn | 25540555 | 25541055 | 501 SAT1_CF  | blue | na |
| chrUn | 25541068 | 25541173 | 106 SAT1_CF  | blue | na |
| chrUn | 25541196 | 25542891 | 1696 SAT1_CF | blue | na |
| chrUn | 25542904 | 25543664 | 761 SAT1_CF  | blue | na |
| chrUn | 25543676 | 25544359 | 684 SAT1_CF  | blue | na |
| chrUn | 25544371 | 25544968 | 598 SAT1_CF  | blue | na |
| chrUn | 25544988 | 25545297 | 310 SAT1_CF  | blue | na |
| chrUn | 25545310 | 25545390 | 81 SAT1_CF   | blue | na |
| chrUn | 25545404 | 25545956 | 553 SAT1_CF  | blue | na |
| chrUn | 25545968 | 25546393 | 426 SAT1_CF  | blue | na |
| chrUn | 25546605 | 25547222 | 618 SAT1_CF  | blue | na |
| chrUn | 25547247 | 25547572 | 326 SAT1_CF  | blue | na |
| chrUn | 25547652 | 25548191 | 540 SAT1_CF  | blue | na |
| chrUn | 25548202 | 25548538 | 337 SAT1_CF  | blue | na |
| chrUn | 25548574 | 25549068 | 495 SAT1_CF  | blue | na |
| chrUn | 25549088 | 25549769 | 682 SAT1_CF  | blue | na |
| chrUn | 25549782 | 25549888 | 107 SAT1_CF  | blue | na |
| chrUn | 25549909 | 25550464 | 556 SAT1_CF  | blue | na |
| chrUn | 25550476 | 25551341 | 866 SAT1_CF  | blue | na |
| chrUn | 25551383 | 25553226 | 1844 SAT1_CF | blue | na |
| chrUn | 25553279 | 25553780 | 502 SAT1_CF  | blue | na |
| chrUn | 25553793 | 25553899 | 107 SAT1_CF  | blue | na |
| chrUn | 25553921 | 25554466 | 546 SAT1_CF  | blue | na |
| chrUn | 25554536 | 25554999 | 464 SAT1_CF  | blue | na |
| chrUn | 25555011 | 25556521 | 1511 SAT1_CF | blue | na |
| chrUn | 25556559 | 25557712 | 1154 SAT1_CF | blue | na |
| chrUn | 25557791 | 25558331 | 541 SAT1_CF  | blue | na |
| chrUn | 25558377 | 25558750 | 374 SAT1_CF  | blue | na |
| chrUn | 25558767 | 25561708 | 2942 SAT1_CF | blue | na |
| chrUn | 25561748 | 25562247 | 500 SAT1_CF  | blue | na |
| chrUn | 25562260 | 25563020 | 761 SAT1_CF  | blue | na |
| chrUn | 25563033 | 25563104 | 72 SAT1_CF   | blue | na |
| chrUn | 25563127 | 25563677 | 551 SAT1_CF  | blue | na |
| chrUn | 25563695 | 25564394 | 700 SAT1_CF  | blue | na |
| chrUn | 25564427 | 25564932 | 506 SAT1_CF  | blue | na |
| chrUn | 25564964 | 25565667 | 704 SAT1_CF  | blue | na |
| chrUn | 25565680 | 25566833 | 1154 SAT1_CF | blue | na |

|       |          |          |              |      |    |
|-------|----------|----------|--------------|------|----|
| chrUn | 25566846 | 25567245 | 400 SAT1_CF  | blue | na |
| chrUn | 25567266 | 25567747 | 482 SAT1_CF  | blue | na |
| chrUn | 25567760 | 25567868 | 109 SAT1_CF  | blue | na |
| chrUn | 25567889 | 25568417 | 529 SAT1_CF  | blue | na |
| chrUn | 25568474 | 25569184 | 711 SAT1_CF  | blue | na |
| chrUn | 25569226 | 25570559 | 1334 SAT1_CF | blue | na |
| chrUn | 25570572 | 25571245 | 674 SAT1_CF  | blue | na |
| chrUn | 25572392 | 25572900 | 509 SAT1_CF  | blue | na |
| chrUn | 25572928 | 25573085 | 158 SAT1_CF  | blue | na |
| chrUn | 25573130 | 25573630 | 501 SAT1_CF  | blue | na |
| chrUn | 25573642 | 25573751 | 110 SAT1_CF  | blue | na |
| chrUn | 25573772 | 25574403 | 632 SAT1_CF  | blue | na |
| chrUn | 25574415 | 25575079 | 665 SAT1_CF  | blue | na |
| chrUn | 25575136 | 25577246 | 2111 SAT1_CF | blue | na |
| chrUn | 25577289 | 25578345 | 1057 SAT1_CF | blue | na |
| chrUn | 25578367 | 25579034 | 668 SAT1_CF  | blue | na |
| chrUn | 25579077 | 25579621 | 545 SAT1_CF  | blue | na |
| chrUn | 25579649 | 25580142 | 494 SAT1_CF  | blue | na |
| chrUn | 25580199 | 25581998 | 1800 SAT1_CF | blue | na |
| chrUn | 25582026 | 25582693 | 668 SAT1_CF  | blue | na |
| chrUn | 25582706 | 25583380 | 675 SAT1_CF  | blue | na |
| chrUn | 25583423 | 25583967 | 545 SAT1_CF  | blue | na |
| chrUn | 25583995 | 25584488 | 494 SAT1_CF  | blue | na |
| chrUn | 25584545 | 25585111 | 567 SAT1_CF  | blue | na |
| chrUn | 25585191 | 25585716 | 526 SAT1_CF  | blue | na |
| chrUn | 25585731 | 25585867 | 137 SAT1_CF  | blue | na |
| chrUn | 25585963 | 25587520 | 1558 SAT1_CF | blue | na |
| chrUn | 25587565 | 25588071 | 507 SAT1_CF  | blue | na |
| chrUn | 25588118 | 25588490 | 373 SAT1_CF  | blue | na |
| chrUn | 25588545 | 25589134 | 590 SAT1_CF  | blue | na |
| chrUn | 25589147 | 25590382 | 1236 SAT1_CF | blue | na |
| chrUn | 25590395 | 25591041 | 647 SAT1_CF  | blue | na |
| chrUn | 25591085 | 25592193 | 1109 SAT1_CF | blue | na |
| chrUn | 25592235 | 25593086 | 852 SAT1_CF  | blue | na |
| chrUn | 25593113 | 25593369 | 257 SAT1_CF  | blue | na |
| chrUn | 25593382 | 25595532 | 2151 SAT1_CF | blue | na |
| chrUn | 25595545 | 25596208 | 664 SAT1_CF  | blue | na |
| chrUn | 25596265 | 25596817 | 553 SAT1_CF  | blue | na |
| chrUn | 25596834 | 25598859 | 2026 SAT1_CF | blue | na |
| chrUn | 25598883 | 25599732 | 850 SAT1_CF  | blue | na |
| chrUn | 25599743 | 25599818 | 76 SAT1_CF   | blue | na |
| chrUn | 25599874 | 25600418 | 545 SAT1_CF  | blue | na |

|       |          |          |              |      |    |
|-------|----------|----------|--------------|------|----|
| chrUn | 25600430 | 25601528 | 1099 SAT1_CF | blue | na |
| chrUn | 25601549 | 25602068 | 520 SAT1_CF  | blue | na |
| chrUn | 25602081 | 25602770 | 690 SAT1_CF  | blue | na |
| chrUn | 25602782 | 25603608 | 827 SAT1_CF  | blue | na |
| chrUn | 25603621 | 25604476 | 856 SAT1_CF  | blue | na |
| chrUn | 25604518 | 25605297 | 780 SAT1_CF  | blue | na |
| chrUn | 25605412 | 25605958 | 547 SAT1_CF  | blue | na |
| chrUn | 25605971 | 25607696 | 1726 SAT1_CF | blue | na |
| chrUn | 25607756 | 25608304 | 549 SAT1_CF  | blue | na |
| chrUn | 25608351 | 25608753 | 403 SAT1_CF  | blue | na |
| chrUn | 25608774 | 25610013 | 1240 SAT1_CF | blue | na |
| chrUn | 25610045 | 25610552 | 508 SAT1_CF  | blue | na |
| chrUn | 25610582 | 25611283 | 702 SAT1_CF  | blue | na |
| chrUn | 25611325 | 25612864 | 1540 SAT1_CF | blue | na |
| chrUn | 25612943 | 25613855 | 913 SAT1_CF  | blue | na |
| chrUn | 25613942 | 25614489 | 548 SAT1_CF  | blue | na |
| chrUn | 25614501 | 25615175 | 675 SAT1_CF  | blue | na |
| chrUn | 25615217 | 25616197 | 981 SAT1_CF  | blue | na |
| chrUn | 25616276 | 25616823 | 548 SAT1_CF  | blue | na |
| chrUn | 25616940 | 25617263 | 324 SAT1_CF  | blue | na |
| chrUn | 25617293 | 25617814 | 522 SAT1_CF  | blue | na |
| chrUn | 25617827 | 25618833 | 1007 SAT1_CF | blue | na |
| chrUn | 25618845 | 25619663 | 819 SAT1_CF  | blue | na |
| chrUn | 25619707 | 25620661 | 955 SAT1_CF  | blue | na |
| chrUn | 25620704 | 25621205 | 502 SAT1_CF  | blue | na |
| chrUn | 25621217 | 25621323 | 107 SAT1_CF  | blue | na |
| chrUn | 25621346 | 25622019 | 674 SAT1_CF  | blue | na |
| chrUn | 25622041 | 25622586 | 546 SAT1_CF  | blue | na |
| chrUn | 25622629 | 25623628 | 1000 SAT1_CF | blue | na |
| chrUn | 25623643 | 25624623 | 981 SAT1_CF  | blue | na |
| chrUn | 25624691 | 25625211 | 521 SAT1_CF  | blue | na |
| chrUn | 25625233 | 25625864 | 632 SAT1_CF  | blue | na |
| chrUn | 25625909 | 25626997 | 1089 SAT1_CF | blue | na |
| chrUn | 25627046 | 25627522 | 477 SAT1_CF  | blue | na |
| chrUn | 25627569 | 25628068 | 500 SAT1_CF  | blue | na |
| chrUn | 25628081 | 25628763 | 683 SAT1_CF  | blue | na |
| chrUn | 25628787 | 25629636 | 850 SAT1_CF  | blue | na |
| chrUn | 25629678 | 25630213 | 536 SAT1_CF  | blue | na |
| chrUn | 25630279 | 25630623 | 345 SAT1_CF  | blue | na |
| chrUn | 25630668 | 25631875 | 1208 SAT1_CF | blue | na |
| chrUn | 25631887 | 25632566 | 680 SAT1_CF  | blue | na |
| chrUn | 25632609 | 25634036 | 1428 SAT1_CF | blue | na |

|       |          |          |              |      |    |
|-------|----------|----------|--------------|------|----|
| chrUn | 25634048 | 25635473 | 1426 SAT1_CF | blue | na |
| chrUn | 25635552 | 25636098 | 547 SAT1_CF  | blue | na |
| chrUn | 25636176 | 25636724 | 549 SAT1_CF  | blue | na |
| chrUn | 25636736 | 25636838 | 103 SAT1_CF  | blue | na |
| chrUn | 25636867 | 25637412 | 546 SAT1_CF  | blue | na |
| chrUn | 25637432 | 25637599 | 168 SAT1_CF  | blue | na |
| chrUn | 25637641 | 25638423 | 783 SAT1_CF  | blue | na |
| chrUn | 25638478 | 25639086 | 609 SAT1_CF  | blue | na |
| chrUn | 25639097 | 25639451 | 355 SAT1_CF  | blue | na |
| chrUn | 25639538 | 25640238 | 701 SAT1_CF  | blue | na |
| chrUn | 25641664 | 25642183 | 520 SAT1_CF  | blue | na |
| chrUn | 25642268 | 25642762 | 495 SAT1_CF  | blue | na |
| chrUn | 25642796 | 25643465 | 670 SAT1_CF  | blue | na |
| chrUn | 25643477 | 25645841 | 2365 SAT1_CF | blue | na |
| chrUn | 25645854 | 25647127 | 1274 SAT1_CF | blue | na |
| chrUn | 25647168 | 25647821 | 654 SAT1_CF  | blue | na |
| chrUn | 25647866 | 25648097 | 232 SAT1_CF  | blue | na |
| chrUn | 25648140 | 25648724 | 585 SAT1_CF  | blue | na |
| chrUn | 25648736 | 25649449 | 714 SAT1_CF  | blue | na |
| chrUn | 25649531 | 25650071 | 541 SAT1_CF  | blue | na |
| chrUn | 25650084 | 25650585 | 502 SAT1_CF  | blue | na |
| chrUn | 25650598 | 25651835 | 1238 SAT1_CF | blue | na |
| chrUn | 25651874 | 25652682 | 809 SAT1_CF  | blue | na |
| chrUn | 25652710 | 25652867 | 158 SAT1_CF  | blue | na |
| chrUn | 25652893 | 25653862 | 970 SAT1_CF  | blue | na |
| chrUn | 25653874 | 25654550 | 677 SAT1_CF  | blue | na |
| chrUn | 25654598 | 25655555 | 958 SAT1_CF  | blue | na |
| chrUn | 25655634 | 25656594 | 961 SAT1_CF  | blue | na |
| chrUn | 25656634 | 25658004 | 1371 SAT1_CF | blue | na |
| chrUn | 25658017 | 25658689 | 673 SAT1_CF  | blue | na |
| chrUn | 25658703 | 25658868 | 166 SAT1_CF  | blue | na |
| chrUn | 25658918 | 25659461 | 544 SAT1_CF  | blue | na |
| chrUn | 25659505 | 25660627 | 1123 SAT1_CF | blue | na |
| chrUn | 25660639 | 25661909 | 1271 SAT1_CF | blue | na |
| chrUn | 25661935 | 25662453 | 519 SAT1_CF  | blue | na |
| chrUn | 25662465 | 25662570 | 106 SAT1_CF  | blue | na |
| chrUn | 25662596 | 25663150 | 555 SAT1_CF  | blue | na |
| chrUn | 25663162 | 25663270 | 109 SAT1_CF  | blue | na |
| chrUn | 25663290 | 25663835 | 546 SAT1_CF  | blue | na |
| chrUn | 25663878 | 25664999 | 1122 SAT1_CF | blue | na |
| chrUn | 25665018 | 25665538 | 521 SAT1_CF  | blue | na |
| chrUn | 25665551 | 25666233 | 683 SAT1_CF  | blue | na |

|       |          |          |              |      |    |
|-------|----------|----------|--------------|------|----|
| chrUn | 25666257 | 25667943 | 1687 SAT1_CF | blue | na |
| chrUn | 25667988 | 25668674 | 687 SAT1_CF  | blue | na |
| chrUn | 25668686 | 25669003 | 318 SAT1_CF  | blue | na |
| chrUn | 25669076 | 25669646 | 571 SAT1_CF  | blue | na |
| chrUn | 25669665 | 25671155 | 1491 SAT1_CF | blue | na |
| chrUn | 25671234 | 25672147 | 914 SAT1_CF  | blue | na |
| chrUn | 25672234 | 25673849 | 1616 SAT1_CF | blue | na |
| chrUn | 25673898 | 25674492 | 595 SAT1_CF  | blue | na |
| chrUn | 25675899 | 25676416 | 518 SAT1_CF  | blue | na |
| chrUn | 25676503 | 25676997 | 495 SAT1_CF  | blue | na |
| chrUn | 25677017 | 25677123 | 107 SAT1_CF  | blue | na |
| chrUn | 25677146 | 25677700 | 555 SAT1_CF  | blue | na |
| chrUn | 25677723 | 25678386 | 664 SAT1_CF  | blue | na |
| chrUn | 25678431 | 25679060 | 630 SAT1_CF  | blue | na |
| chrUn | 25679088 | 25680280 | 1193 SAT1_CF | blue | na |
| chrUn | 25680308 | 25680444 | 137 SAT1_CF  | blue | na |
| chrUn | 25680491 | 25681532 | 1042 SAT1_CF | blue | na |
| chrUn | 25681543 | 25682035 | 493 SAT1_CF  | blue | na |
| chrUn | 25682049 | 25683414 | 1366 SAT1_CF | blue | na |
| chrUn | 25683441 | 25683962 | 522 SAT1_CF  | blue | na |
| chrUn | 25684010 | 25684520 | 511 SAT1_CF  | blue | na |
| chrUn | 25684538 | 25684999 | 462 SAT1_CF  | blue | na |
| chrUn | 25685043 | 25686862 | 1820 SAT1_CF | blue | na |
| chrUn | 25686900 | 25688011 | 1112 SAT1_CF | blue | na |
| chrUn | 25688031 | 25689480 | 1450 SAT1_CF | blue | na |
| chrUn | 25689577 | 25690119 | 543 SAT1_CF  | blue | na |
| chrUn | 25690163 | 25690723 | 561 SAT1_CF  | blue | na |
| chrUn | 25690766 | 25691291 | 526 SAT1_CF  | blue | na |
| chrUn | 25691306 | 25691442 | 137 SAT1_CF  | blue | na |
| chrUn | 25691527 | 25692009 | 483 SAT1_CF  | blue | na |
| chrUn | 25692022 | 25692704 | 683 SAT1_CF  | blue | na |
| chrUn | 25692716 | 25693574 | 859 SAT1_CF  | blue | na |
| chrUn | 25693616 | 25695062 | 1447 SAT1_CF | blue | na |
| chrUn | 25695076 | 25695907 | 832 SAT1_CF  | blue | na |
| chrUn | 25695920 | 25696027 | 108 SAT1_CF  | blue | na |
| chrUn | 25696049 | 25696623 | 575 SAT1_CF  | blue | na |
| chrUn | 25696635 | 25697311 | 677 SAT1_CF  | blue | na |
| chrUn | 25697324 | 25698153 | 830 SAT1_CF  | blue | na |
| chrUn | 25698183 | 25698822 | 640 SAT1_CF  | blue | na |
| chrUn | 25698843 | 25699356 | 514 SAT1_CF  | blue | na |
| chrUn | 25699376 | 25700058 | 683 SAT1_CF  | blue | na |
| chrUn | 25700070 | 25701369 | 1300 SAT1_CF | blue | na |

|       |          |          |              |      |    |
|-------|----------|----------|--------------|------|----|
| chrUn | 25701473 | 25702570 | 1098 SAT1_CF | blue | na |
| chrUn | 25702584 | 25702689 | 106 SAT1_CF  | blue | na |
| chrUn | 25702712 | 25703273 | 562 SAT1_CF  | blue | na |
| chrUn | 25703285 | 25704191 | 907 SAT1_CF  | blue | na |
| chrUn | 25704220 | 25706039 | 1820 SAT1_CF | blue | na |
| chrUn | 25706079 | 25706580 | 502 SAT1_CF  | blue | na |
| chrUn | 25706606 | 25707349 | 744 SAT1_CF  | blue | na |
| chrUn | 25707361 | 25708221 | 861 SAT1_CF  | blue | na |
| chrUn | 25708264 | 25709893 | 1630 SAT1_CF | blue | na |
| chrUn | 25709921 | 25710056 | 136 SAT1_CF  | blue | na |
| chrUn | 25710122 | 25711309 | 1188 SAT1_CF | blue | na |
| chrUn | 25711352 | 25712449 | 1098 SAT1_CF | blue | na |
| chrUn | 25712461 | 25712562 | 102 SAT1_CF  | blue | na |
| chrUn | 25712591 | 25713138 | 548 SAT1_CF  | blue | na |
| chrUn | 25713180 | 25714281 | 1102 SAT1_CF | blue | na |
| chrUn | 25714299 | 25714822 | 524 SAT1_CF  | blue | na |
| chrUn | 25714837 | 25714993 | 157 SAT1_CF  | blue | na |
| chrUn | 25715039 | 25715540 | 502 SAT1_CF  | blue | na |
| chrUn | 25715567 | 25716402 | 836 SAT1_CF  | blue | na |
| chrUn | 25716421 | 25716940 | 520 SAT1_CF  | blue | na |
| chrUn | 25716952 | 25718644 | 1693 SAT1_CF | blue | na |
| chrUn | 25718688 | 25719228 | 541 SAT1_CF  | blue | na |
| chrUn | 25719240 | 25720098 | 859 SAT1_CF  | blue | na |
| chrUn | 25720140 | 25721010 | 871 SAT1_CF  | blue | na |
| chrUn | 25721037 | 25721586 | 550 SAT1_CF  | blue | na |
| chrUn | 25721668 | 25721835 | 168 SAT1_CF  | blue | na |
| chrUn | 25722018 | 25722203 | 186 SAT1_CF  | blue | na |
| chrUn | 25722239 | 25722739 | 501 SAT1_CF  | blue | na |
| chrUn | 25722752 | 25722857 | 106 SAT1_CF  | blue | na |
| chrUn | 25722880 | 25724573 | 1694 SAT1_CF | blue | na |
| chrUn | 25724586 | 25725345 | 760 SAT1_CF  | blue | na |
| chrUn | 25725357 | 25726040 | 684 SAT1_CF  | blue | na |
| chrUn | 25726052 | 25726980 | 929 SAT1_CF  | blue | na |
| chrUn | 25726993 | 25728075 | 1083 SAT1_CF | blue | na |
| chrUn | 25728117 | 25731079 | 2963 SAT1_CF | blue | na |
| chrUn | 25731090 | 25731692 | 603 SAT1_CF  | blue | na |
| chrUn | 25731704 | 25732490 | 787 SAT1_CF  | blue | na |
| chrUn | 25732535 | 25733037 | 503 SAT1_CF  | blue | na |
| chrUn | 25733050 | 25733156 | 107 SAT1_CF  | blue | na |
| chrUn | 25733178 | 25733731 | 554 SAT1_CF  | blue | na |
| chrUn | 25733743 | 25734749 | 1007 SAT1_CF | blue | na |
| chrUn | 25734831 | 25735357 | 527 SAT1_CF  | blue | na |

|       |          |          |              |      |    |
|-------|----------|----------|--------------|------|----|
| chrUn | 25735401 | 25736440 | 1040 SAT1_CF | blue | na |
| chrUn | 25736483 | 25737027 | 545 SAT1_CF  | blue | na |
| chrUn | 25737040 | 25737876 | 837 SAT1_CF  | blue | na |
| chrUn | 25737890 | 25738591 | 702 SAT1_CF  | blue | na |
| chrUn | 25738613 | 25740964 | 2352 SAT1_CF | blue | na |
| chrUn | 25740979 | 25741136 | 158 SAT1_CF  | blue | na |
| chrUn | 25741181 | 25741681 | 501 SAT1_CF  | blue | na |
| chrUn | 25741698 | 25742453 | 756 SAT1_CF  | blue | na |
| chrUn | 25742474 | 25742539 | 66 SAT1_CF   | blue | na |
| chrUn | 25742560 | 25743077 | 518 SAT1_CF  | blue | na |
| chrUn | 25743089 | 25743949 | 861 SAT1_CF  | blue | na |
| chrUn | 25743991 | 25745687 | 1697 SAT1_CF | blue | na |
| chrUn | 25745869 | 25746590 | 722 SAT1_CF  | blue | na |
| chrUn | 25746603 | 25748431 | 1829 SAT1_CF | blue | na |
| chrUn | 25748477 | 25748607 | 131 SAT1_CF  | blue | na |
| chrUn | 25748629 | 25749187 | 559 SAT1_CF  | blue | na |
| chrUn | 25749199 | 25750911 | 1713 SAT1_CF | blue | na |
| chrUn | 25750966 | 25751573 | 608 SAT1_CF  | blue | na |
| chrUn | 25751586 | 25751941 | 356 SAT1_CF  | blue | na |
| chrUn | 25752058 | 25752576 | 519 SAT1_CF  | blue | na |
| chrUn | 25752607 | 25753133 | 527 SAT1_CF  | blue | na |
| chrUn | 25753177 | 25754416 | 1240 SAT1_CF | blue | na |
| chrUn | 25754431 | 25754588 | 158 SAT1_CF  | blue | na |
| chrUn | 25754633 | 25755906 | 1274 SAT1_CF | blue | na |
| chrUn | 25755918 | 25756027 | 110 SAT1_CF  | blue | na |
| chrUn | 25756048 | 25756592 | 545 SAT1_CF  | blue | na |
| chrUn | 25756653 | 25757378 | 726 SAT1_CF  | blue | na |
| chrUn | 25757511 | 25758655 | 1145 SAT1_CF | blue | na |
| chrUn | 25758713 | 25759191 | 479 SAT1_CF  | blue | na |
| chrUn | 25759204 | 25759309 | 106 SAT1_CF  | blue | na |
| chrUn | 25759332 | 25760506 | 1175 SAT1_CF | blue | na |
| chrUn | 25760538 | 25760672 | 135 SAT1_CF  | blue | na |
| chrUn | 25760738 | 25761237 | 500 SAT1_CF  | blue | na |
| chrUn | 25761250 | 25761924 | 675 SAT1_CF  | blue | na |
| chrUn | 25761967 | 25763993 | 2027 SAT1_CF | blue | na |
| chrUn | 25764076 | 25764614 | 539 SAT1_CF  | blue | na |
| chrUn | 25764634 | 25764741 | 108 SAT1_CF  | blue | na |
| chrUn | 25764762 | 25765317 | 556 SAT1_CF  | blue | na |
| chrUn | 25765329 | 25766536 | 1208 SAT1_CF | blue | na |
| chrUn | 25766551 | 25766687 | 137 SAT1_CF  | blue | na |
| chrUn | 25766782 | 25767301 | 520 SAT1_CF  | blue | na |
| chrUn | 25767358 | 25767904 | 547 SAT1_CF  | blue | na |

|       |          |          |              |      |    |
|-------|----------|----------|--------------|------|----|
| chrUn | 25767946 | 25768800 | 855 SAT1_CF  | blue | na |
| chrUn | 25768845 | 25769353 | 509 SAT1_CF  | blue | na |
| chrUn | 25769364 | 25769766 | 403 SAT1_CF  | blue | na |
| chrUn | 25769806 | 25770307 | 502 SAT1_CF  | blue | na |
| chrUn | 25770334 | 25771005 | 672 SAT1_CF  | blue | na |
| chrUn | 25771019 | 25771096 | 78 SAT1_CF   | blue | na |
| chrUn | 25771113 | 25771632 | 520 SAT1_CF  | blue | na |
| chrUn | 25771644 | 25773291 | 1648 SAT1_CF | blue | na |
| chrUn | 25773370 | 25773918 | 549 SAT1_CF  | blue | na |
| chrUn | 25773961 | 25774361 | 401 SAT1_CF  | blue | na |
| chrUn | 25774407 | 25774908 | 502 SAT1_CF  | blue | na |
| chrUn | 25774931 | 25775602 | 672 SAT1_CF  | blue | na |
| chrUn | 25775614 | 25775730 | 117 SAT1_CF  | blue | na |
| chrUn | 25775743 | 25777391 | 1649 SAT1_CF | blue | na |
| chrUn | 25777439 | 25778359 | 921 SAT1_CF  | blue | na |
| chrUn | 25778401 | 25778893 | 493 SAT1_CF  | blue | na |
| chrUn | 25778913 | 25780289 | 1377 SAT1_CF | blue | na |
| chrUn | 25780301 | 25781054 | 754 SAT1_CF  | blue | na |
| chrUn | 25781074 | 25783373 | 2300 SAT1_CF | blue | na |
| chrUn | 25783386 | 25784580 | 1195 SAT1_CF | blue | na |
| chrUn | 25784594 | 25785937 | 1344 SAT1_CF | blue | na |
| chrUn | 25785981 | 25786838 | 858 SAT1_CF  | blue | na |
| chrUn | 26178913 | 26179715 | 803 SAT1_CF  | blue | na |
| chrUn | 26179728 | 26180243 | 516 SAT1_CF  | blue | na |
| chrUn | 26180279 | 26180652 | 374 SAT1_CF  | blue | na |
| chrUn | 26180695 | 26181244 | 550 SAT1_CF  | blue | na |
| chrUn | 26181323 | 26183614 | 2292 SAT1_CF | blue | na |
| chrUn | 26183635 | 26184202 | 568 SAT1_CF  | blue | na |
| chrUn | 26184260 | 26186118 | 1859 SAT1_CF | blue | na |
| chrUn | 26186188 | 26186860 | 673 SAT1_CF  | blue | na |
| chrUn | 26186872 | 26188813 | 1942 SAT1_CF | blue | na |
| chrUn | 26188835 | 26190034 | 1200 SAT1_CF | blue | na |
| chrUn | 26190074 | 26190475 | 402 SAT1_CF  | blue | na |
| chrUn | 26190486 | 26191008 | 523 SAT1_CF  | blue | na |
| chrUn | 26191026 | 26191745 | 720 SAT1_CF  | blue | na |
| chrUn | 26191772 | 26192370 | 599 SAT1_CF  | blue | na |
| chrUn | 26192383 | 26193374 | 992 SAT1_CF  | blue | na |
| chrUn | 26193392 | 26195196 | 1805 SAT1_CF | blue | na |
| chrUn | 26195208 | 26195969 | 762 SAT1_CF  | blue | na |
| chrUn | 26195982 | 26196483 | 502 SAT1_CF  | blue | na |
| chrUn | 26196540 | 26196922 | 383 SAT1_CF  | blue | na |
| chrUn | 26196934 | 26198720 | 1787 SAT1_CF | blue | na |



|       |          |          |      |         |      |    |
|-------|----------|----------|------|---------|------|----|
| chrUn | 26198732 | 26199923 | 1192 | SAT1_CF | blue | na |
| chrUn | 26199935 | 26200496 | 562  | SAT1_CF | blue | na |
| chrUn | 26200516 | 26200624 | 109  | SAT1_CF | blue | na |
| chrUn | 26200637 | 26201339 | 703  | SAT1_CF | blue | na |
| chrUn | 26201354 | 26202626 | 1273 | SAT1_CF | blue | na |
| chrUn | 26202654 | 26202754 | 101  | SAT1_CF | blue | na |
| chrUn | 26202767 | 26203268 | 502  | SAT1_CF | blue | na |
| chrUn | 26203355 | 26203897 | 543  | SAT1_CF | blue | na |
| chrUn | 26203948 | 26204831 | 884  | SAT1_CF | blue | na |
| chrUn | 26204874 | 26206715 | 1842 | SAT1_CF | blue | na |
| chrUn | 26206787 | 26207322 | 536  | SAT1_CF | blue | na |
| chrUn | 26207401 | 26208065 | 665  | SAT1_CF | blue | na |
| chrUn | 26208079 | 26208570 | 492  | SAT1_CF | blue | na |
| chrUn | 26208581 | 26210961 | 2381 | SAT1_CF | blue | na |
| chrUn | 26210983 | 26211504 | 522  | SAT1_CF | blue | na |
| chrUn | 26211551 | 26211687 | 137  | SAT1_CF | blue | na |
| chrUn | 26211702 | 26213567 | 1866 | SAT1_CF | blue | na |
| chrUn | 26213610 | 26214286 | 677  | SAT1_CF | blue | na |
| chrUn | 26214299 | 26214980 | 682  | SAT1_CF | blue | na |
| chrUn | 26215000 | 26215494 | 495  | SAT1_CF | blue | na |
| chrUn | 26215534 | 26216106 | 573  | SAT1_CF | blue | na |
| chrUn | 26217523 | 26219181 | 1659 | SAT1_CF | blue | na |
| chrUn | 26219192 | 26219875 | 684  | SAT1_CF | blue | na |
| chrUn | 26219887 | 26220570 | 684  | SAT1_CF | blue | na |
| chrUn | 26220583 | 26221084 | 502  | SAT1_CF | blue | na |
| chrUn | 26221124 | 26222082 | 959  | SAT1_CF | blue | na |
| chrUn | 26222113 | 26222832 | 720  | SAT1_CF | blue | na |
| chrUn | 26222876 | 26223418 | 543  | SAT1_CF | blue | na |
| chrUn | 26223444 | 26224242 | 799  | SAT1_CF | blue | na |
| chrUn | 26224255 | 26225146 | 892  | SAT1_CF | blue | na |
| chrUn | 26225158 | 26225915 | 758  | SAT1_CF | blue | na |
| chrUn | 26225928 | 26226429 | 502  | SAT1_CF | blue | na |
| chrUn | 26226469 | 26227980 | 1512 | SAT1_CF | blue | na |
| chrUn | 26228008 | 26228640 | 633  | SAT1_CF | blue | na |
| chrUn | 26228683 | 26229229 | 547  | SAT1_CF | blue | na |
| chrUn | 26229287 | 26229958 | 672  | SAT1_CF | blue | na |
| chrUn | 26229981 | 26231479 | 1499 | SAT1_CF | blue | na |
| chrUn | 26231560 | 26232524 | 965  | SAT1_CF | blue | na |
| chrUn | 26232566 | 26233110 | 545  | SAT1_CF | blue | na |
| chrUn | 26233122 | 26233231 | 110  | SAT1_CF | blue | na |
| chrUn | 26233243 | 26233717 | 475  | SAT1_CF | blue | na |
| chrUn | 26233787 | 26234459 | 673  | SAT1_CF | blue | na |

|       |          |          |              |      |    |
|-------|----------|----------|--------------|------|----|
| chrUn | 26234471 | 26235231 | 761 SAT1_CF  | blue | na |
| chrUn | 26235243 | 26235918 | 676 SAT1_CF  | blue | na |
| chrUn | 26235937 | 26236436 | 500 SAT1_CF  | blue | na |
| chrUn | 26236468 | 26236844 | 377 SAT1_CF  | blue | na |
| chrUn | 26236887 | 26238219 | 1333 SAT1_CF | blue | na |
| chrUn | 26238231 | 26238726 | 496 SAT1_CF  | blue | na |
| chrUn | 26238801 | 26239346 | 546 SAT1_CF  | blue | na |
| chrUn | 26239376 | 26241018 | 1643 SAT1_CF | blue | na |
| chrUn | 26241045 | 26241526 | 482 SAT1_CF  | blue | na |
| chrUn | 26241552 | 26242618 | 1067 SAT1_CF | blue | na |
| chrUn | 26242636 | 26243135 | 500 SAT1_CF  | blue | na |
| chrUn | 26243188 | 26245175 | 1988 SAT1_CF | blue | na |
| chrUn | 26245218 | 26245897 | 680 SAT1_CF  | blue | na |
| chrUn | 26245909 | 26247137 | 1229 SAT1_CF | blue | na |
| chrUn | 26247218 | 26247740 | 523 SAT1_CF  | blue | na |
| chrUn | 26247762 | 26248040 | 279 SAT1_CF  | blue | na |
| chrUn | 26248082 | 26248626 | 545 SAT1_CF  | blue | na |
| chrUn | 26248668 | 26249215 | 548 SAT1_CF  | blue | na |
| chrUn | 26249272 | 26249790 | 519 SAT1_CF  | blue | na |
| chrUn | 26249905 | 26250257 | 353 SAT1_CF  | blue | na |
| chrUn | 26250270 | 26251627 | 1358 SAT1_CF | blue | na |
| chrUn | 26251639 | 26252158 | 520 SAT1_CF  | blue | na |
| chrUn | 26252184 | 26252691 | 508 SAT1_CF  | blue | na |
| chrUn | 26252704 | 26253222 | 519 SAT1_CF  | blue | na |
| chrUn | 26253241 | 26254166 | 926 SAT1_CF  | blue | na |
| chrUn | 26254194 | 26255104 | 911 SAT1_CF  | blue | na |
| chrUn | 26255116 | 26256299 | 1184 SAT1_CF | blue | na |
| chrUn | 26256359 | 26256762 | 404 SAT1_CF  | blue | na |
| chrUn | 26256773 | 26257295 | 523 SAT1_CF  | blue | na |
| chrUn | 26257327 | 26258376 | 1050 SAT1_CF | blue | na |
| chrUn | 26258419 | 26259093 | 675 SAT1_CF  | blue | na |
| chrUn | 26259106 | 26259606 | 501 SAT1_CF  | blue | na |
| chrUn | 26259672 | 26259807 | 136 SAT1_CF  | blue | na |
| chrUn | 26259840 | 26261107 | 1268 SAT1_CF | blue | na |
| chrUn | 26261120 | 26261803 | 684 SAT1_CF  | blue | na |
| chrUn | 26261816 | 26262333 | 518 SAT1_CF  | blue | na |
| chrUn | 26262360 | 26263620 | 1261 SAT1_CF | blue | na |
| chrUn | 26263632 | 26264314 | 683 SAT1_CF  | blue | na |
| chrUn | 26264334 | 26264847 | 514 SAT1_CF  | blue | na |
| chrUn | 26264873 | 26265030 | 158 SAT1_CF  | blue | na |
| chrUn | 26265058 | 26265566 | 509 SAT1_CF  | blue | na |
| chrUn | 26265609 | 26266173 | 565 SAT1_CF  | blue | na |

|       |          |          |              |      |    |
|-------|----------|----------|--------------|------|----|
| chrUn | 26266201 | 26266828 | 628 SAT1_CF  | blue | na |
| chrUn | 26266873 | 26267545 | 673 SAT1_CF  | blue | na |
| chrUn | 26267557 | 26268111 | 555 SAT1_CF  | blue | na |
| chrUn | 26268173 | 26268729 | 557 SAT1_CF  | blue | na |
| chrUn | 26268785 | 26268970 | 186 SAT1_CF  | blue | na |
| chrUn | 26269150 | 26269352 | 203 SAT1_CF  | blue | na |
| chrUn | 26269395 | 26269943 | 549 SAT1_CF  | blue | na |
| chrUn | 26270022 | 26271648 | 1627 SAT1_CF | blue | na |
| chrUn | 26271671 | 26272494 | 824 SAT1_CF  | blue | na |
| chrUn | 26273017 | 26273241 | 225 SAT1_CF  | blue | na |
| chrUn | 26273252 | 26274031 | 780 SAT1_CF  | blue | na |
| chrUn | 26274112 | 26274764 | 653 SAT1_CF  | blue | na |
| chrUn | 26274776 | 26275459 | 684 SAT1_CF  | blue | na |
| chrUn | 26275472 | 26278089 | 2618 SAT1_CF | blue | na |
| chrUn | 26278105 | 26278531 | 427 SAT1_CF  | blue | na |
| chrUn | 26278545 | 26279182 | 638 SAT1_CF  | blue | na |
| chrUn | 26279200 | 26280023 | 824 SAT1_CF  | blue | na |
| chrUn | 26280036 | 26280555 | 520 SAT1_CF  | blue | na |
| chrUn | 26280589 | 26281278 | 690 SAT1_CF  | blue | na |
| chrUn | 26281308 | 26282929 | 1622 SAT1_CF | blue | na |
| chrUn | 26282943 | 26283624 | 682 SAT1_CF  | blue | na |
| chrUn | 26283636 | 26284190 | 555 SAT1_CF  | blue | na |
| chrUn | 26284253 | 26284849 | 597 SAT1_CF  | blue | na |
| chrUn | 26284875 | 26285030 | 156 SAT1_CF  | blue | na |
| chrUn | 26285045 | 26285571 | 527 SAT1_CF  | blue | na |
| chrUn | 26285602 | 26287551 | 1950 SAT1_CF | blue | na |
| chrUn | 26287564 | 26288065 | 502 SAT1_CF  | blue | na |
| chrUn | 26288118 | 26288507 | 390 SAT1_CF  | blue | na |
| chrUn | 26288520 | 26289041 | 522 SAT1_CF  | blue | na |
| chrUn | 26289108 | 26290066 | 959 SAT1_CF  | blue | na |
| chrUn | 26290114 | 26290791 | 678 SAT1_CF  | blue | na |
| chrUn | 26290803 | 26291487 | 685 SAT1_CF  | blue | na |
| chrUn | 26291500 | 26292000 | 501 SAT1_CF  | blue | na |
| chrUn | 26292087 | 26292441 | 355 SAT1_CF  | blue | na |
| chrUn | 26292452 | 26292503 | 52 SAT1_CF   | blue | na |
| chrUn | 26292526 | 26293206 | 681 SAT1_CF  | blue | na |
| chrUn | 26293219 | 26293739 | 521 SAT1_CF  | blue | na |
| chrUn | 26293809 | 26293980 | 172 SAT1_CF  | blue | na |
| chrUn | 26294062 | 26294624 | 563 SAT1_CF  | blue | na |
| chrUn | 26294667 | 26295925 | 1259 SAT1_CF | blue | na |
| chrUn | 26296004 | 26297414 | 1411 SAT1_CF | blue | na |
| chrUn | 26297427 | 26298110 | 684 SAT1_CF  | blue | na |

|       |          |          |              |      |    |
|-------|----------|----------|--------------|------|----|
| chrUn | 26298122 | 26298805 | 684 SAT1_CF  | blue | na |
| chrUn | 26298818 | 26299317 | 500 SAT1_CF  | blue | na |
| chrUn | 26299357 | 26299616 | 260 SAT1_CF  | blue | na |
| chrUn | 26299660 | 26300207 | 548 SAT1_CF  | blue | na |
| chrUn | 26300250 | 26300941 | 692 SAT1_CF  | blue | na |
| chrUn | 26300953 | 26303076 | 2124 SAT1_CF | blue | na |
| chrUn | 26303118 | 26303848 | 731 SAT1_CF  | blue | na |
| chrUn | 26303868 | 26303977 | 110 SAT1_CF  | blue | na |
| chrUn | 26303989 | 26305455 | 1467 SAT1_CF | blue | na |
| chrUn | 26305522 | 26307114 | 1593 SAT1_CF | blue | na |
| chrUn | 26307256 | 26307775 | 520 SAT1_CF  | blue | na |
| chrUn | 26307801 | 26307958 | 158 SAT1_CF  | blue | na |
| chrUn | 26307973 | 26308497 | 525 SAT1_CF  | blue | na |
| chrUn | 26308578 | 26309142 | 565 SAT1_CF  | blue | na |
| chrUn | 26309169 | 26309797 | 629 SAT1_CF  | blue | na |
| chrUn | 26309842 | 26310507 | 666 SAT1_CF  | blue | na |
| chrUn | 26310529 | 26311214 | 686 SAT1_CF  | blue | na |
| chrUn | 26311226 | 26311708 | 483 SAT1_CF  | blue | na |
| chrUn | 26311768 | 26312165 | 398 SAT1_CF  | blue | na |
| chrUn | 26312177 | 26312726 | 550 SAT1_CF  | blue | na |
| chrUn | 26312805 | 26313766 | 962 SAT1_CF  | blue | na |
| chrUn | 26313809 | 26316080 | 2272 SAT1_CF | blue | na |
| chrUn | 26316092 | 26316775 | 684 SAT1_CF  | blue | na |
| chrUn | 26316795 | 26317289 | 495 SAT1_CF  | blue | na |
| chrUn | 26317329 | 26317907 | 579 SAT1_CF  | blue | na |
| chrUn | 26317928 | 26318480 | 553 SAT1_CF  | blue | na |
| chrUn | 26318499 | 26319069 | 571 SAT1_CF  | blue | na |
| chrUn | 26319102 | 26319642 | 541 SAT1_CF  | blue | na |
| chrUn | 26319691 | 26321001 | 1311 SAT1_CF | blue | na |
| chrUn | 26321043 | 26321773 | 731 SAT1_CF  | blue | na |
| chrUn | 26321794 | 26321902 | 109 SAT1_CF  | blue | na |
| chrUn | 26321915 | 26322417 | 503 SAT1_CF  | blue | na |
| chrUn | 26322457 | 26323376 | 920 SAT1_CF  | blue | na |
| chrUn | 26323420 | 26323721 | 302 SAT1_CF  | blue | na |
| chrUn | 26323769 | 26325102 | 1334 SAT1_CF | blue | na |
| chrUn | 26325115 | 26325617 | 503 SAT1_CF  | blue | na |
| chrUn | 26325703 | 26327202 | 1500 SAT1_CF | blue | na |
| chrUn | 26327214 | 26327765 | 552 SAT1_CF  | blue | na |
| chrUn | 26327787 | 26327859 | 73 SAT1_CF   | blue | na |
| chrUn | 26327872 | 26328799 | 928 SAT1_CF  | blue | na |
| chrUn | 26328811 | 26329494 | 684 SAT1_CF  | blue | na |
| chrUn | 26329506 | 26330527 | 1022 SAT1_CF | blue | na |

|       |          |          |              |      |    |
|-------|----------|----------|--------------|------|----|
| chrUn | 26330571 | 26331353 | 783 SAT1_CF  | blue | na |
| chrUn | 26331395 | 26332260 | 866 SAT1_CF  | blue | na |
| chrUn | 26332272 | 26332826 | 555 SAT1_CF  | blue | na |
| chrUn | 26332848 | 26332953 | 106 SAT1_CF  | blue | na |
| chrUn | 26332966 | 26333439 | 474 SAT1_CF  | blue | na |
| chrUn | 26333495 | 26333570 | 76 SAT1_CF   | blue | na |
| chrUn | 26333581 | 26335234 | 1654 SAT1_CF | blue | na |
| chrUn | 26335246 | 26336020 | 775 SAT1_CF  | blue | na |
| chrUn | 26336035 | 26338203 | 2169 SAT1_CF | blue | na |
| chrUn | 26338295 | 26338834 | 540 SAT1_CF  | blue | na |
| chrUn | 26338878 | 26339554 | 677 SAT1_CF  | blue | na |
| chrUn | 26339566 | 26340326 | 761 SAT1_CF  | blue | na |
| chrUn | 26340338 | 26341019 | 682 SAT1_CF  | blue | na |
| chrUn | 26341033 | 26342560 | 1528 SAT1_CF | blue | na |
| chrUn | 26342604 | 26343601 | 998 SAT1_CF  | blue | na |
| chrUn | 26343644 | 26344190 | 547 SAT1_CF  | blue | na |
| chrUn | 26344211 | 26344320 | 110 SAT1_CF  | blue | na |
| chrUn | 26344332 | 26344853 | 522 SAT1_CF  | blue | na |
| chrUn | 26344870 | 26345242 | 373 SAT1_CF  | blue | na |
| chrUn | 26345285 | 26345895 | 611 SAT1_CF  | blue | na |
| chrUn | 26345950 | 26346617 | 668 SAT1_CF  | blue | na |
| chrUn | 26346629 | 26347391 | 763 SAT1_CF  | blue | na |
| chrUn | 26347403 | 26348085 | 683 SAT1_CF  | blue | na |
| chrUn | 26348098 | 26348600 | 503 SAT1_CF  | blue | na |
| chrUn | 26348646 | 26348753 | 108 SAT1_CF  | blue | na |
| chrUn | 26348817 | 26349341 | 525 SAT1_CF  | blue | na |
| chrUn | 26349384 | 26349784 | 401 SAT1_CF  | blue | na |
| chrUn | 26349864 | 26350446 | 583 SAT1_CF  | blue | na |
| chrUn | 26350473 | 26351103 | 631 SAT1_CF  | blue | na |
| chrUn | 26351146 | 26352555 | 1410 SAT1_CF | blue | na |
| chrUn | 26352582 | 26353063 | 482 SAT1_CF  | blue | na |
| chrUn | 26353089 | 26353517 | 429 SAT1_CF  | blue | na |
| chrUn | 26353556 | 26354097 | 542 SAT1_CF  | blue | na |
| chrUn | 26354145 | 26354397 | 253 SAT1_CF  | blue | na |
| chrUn | 26354431 | 26354925 | 495 SAT1_CF  | blue | na |
| chrUn | 26355012 | 26355547 | 536 SAT1_CF  | blue | na |
| chrUn | 26356948 | 26357548 | 601 SAT1_CF  | blue | na |
| chrUn | 26357579 | 26358042 | 464 SAT1_CF  | blue | na |
| chrUn | 26358054 | 26358874 | 821 SAT1_CF  | blue | na |
| chrUn | 26358920 | 26360254 | 1335 SAT1_CF | blue | na |
| chrUn | 26360266 | 26360768 | 503 SAT1_CF  | blue | na |
| chrUn | 26360832 | 26360967 | 136 SAT1_CF  | blue | na |

|       |          |          |              |      |    |
|-------|----------|----------|--------------|------|----|
| chrUn | 26360982 | 26362251 | 1270 SAT1_CF | blue | na |
| chrUn | 26362274 | 26362379 | 106 SAT1_CF  | blue | na |
| chrUn | 26362392 | 26362910 | 519 SAT1_CF  | blue | na |
| chrUn | 26362931 | 26363112 | 182 SAT1_CF  | blue | na |
| chrUn | 26363294 | 26364505 | 1212 SAT1_CF | blue | na |
| chrUn | 26364516 | 26365060 | 545 SAT1_CF  | blue | na |
| chrUn | 26365101 | 26366402 | 1302 SAT1_CF | blue | na |
| chrUn | 26366416 | 26366967 | 552 SAT1_CF  | blue | na |
| chrUn | 26366989 | 26367096 | 108 SAT1_CF  | blue | na |
| chrUn | 26367109 | 26368178 | 1070 SAT1_CF | blue | na |
| chrUn | 26368235 | 26368714 | 480 SAT1_CF  | blue | na |
| chrUn | 26368728 | 26369272 | 545 SAT1_CF  | blue | na |
| chrUn | 26369314 | 26370023 | 710 SAT1_CF  | blue | na |
| chrUn | 26370044 | 26370153 | 110 SAT1_CF  | blue | na |
| chrUn | 26370165 | 26371552 | 1388 SAT1_CF | blue | na |
| chrUn | 26371575 | 26371680 | 106 SAT1_CF  | blue | na |
| chrUn | 26371693 | 26372241 | 549 SAT1_CF  | blue | na |
| chrUn | 26372285 | 26373283 | 999 SAT1_CF  | blue | na |
| chrUn | 26373326 | 26373999 | 674 SAT1_CF  | blue | na |
| chrUn | 26374013 | 26374642 | 630 SAT1_CF  | blue | na |
| chrUn | 26374663 | 26374772 | 110 SAT1_CF  | blue | na |
| chrUn | 26374784 | 26375387 | 604 SAT1_CF  | blue | na |
| chrUn | 26375400 | 26375920 | 521 SAT1_CF  | blue | na |
| chrUn | 26375946 | 26376102 | 157 SAT1_CF  | blue | na |
| chrUn | 26376117 | 26378472 | 2356 SAT1_CF | blue | na |
| chrUn | 26378494 | 26379196 | 703 SAT1_CF  | blue | na |
| chrUn | 26379209 | 26379474 | 266 SAT1_CF  | blue | na |
| chrUn | 26380474 | 26380923 | 450 SAT1_CF  | blue | na |
| chrUn | 26380973 | 26381673 | 701 SAT1_CF  | blue | na |
| chrUn | 26381723 | 26383044 | 1322 SAT1_CF | blue | na |
| chrUn | 26383059 | 26383564 | 506 SAT1_CF  | blue | na |
| chrUn | 26383644 | 26383950 | 307 SAT1_CF  | blue | na |
| chrUn | 26383994 | 26385195 | 1202 SAT1_CF | blue | na |
| chrUn | 26385265 | 26385807 | 543 SAT1_CF  | blue | na |
| chrUn | 26385828 | 26386116 | 289 SAT1_CF  | blue | na |
| chrUn | 26386158 | 26386874 | 717 SAT1_CF  | blue | na |
| chrUn | 26386892 | 26387393 | 502 SAT1_CF  | blue | na |
| chrUn | 26387433 | 26387828 | 396 SAT1_CF  | blue | na |
| chrUn | 26387849 | 26388355 | 507 SAT1_CF  | blue | na |
| chrUn | 26388435 | 26389398 | 964 SAT1_CF  | blue | na |
| chrUn | 26389443 | 26390808 | 1366 SAT1_CF | blue | na |
| chrUn | 26390821 | 26391300 | 480 SAT1_CF  | blue | na |

|       |          |          |              |      |    |
|-------|----------|----------|--------------|------|----|
| chrUn | 26391370 | 26391937 | 568 SAT1_CF  | blue | na |
| chrUn | 26393351 | 26393914 | 564 SAT1_CF  | blue | na |
| chrUn | 26393928 | 26394334 | 407 SAT1_CF  | blue | na |
| chrUn | 26394345 | 26395553 | 1209 SAT1_CF | blue | na |
| chrUn | 26395571 | 26396061 | 491 SAT1_CF  | blue | na |
| chrUn | 26396075 | 26396756 | 682 SAT1_CF  | blue | na |
| chrUn | 26396768 | 26397451 | 684 SAT1_CF  | blue | na |
| chrUn | 26397465 | 26397964 | 500 SAT1_CF  | blue | na |
| chrUn | 26398020 | 26398369 | 350 SAT1_CF  | blue | na |
| chrUn | 26398403 | 26398912 | 510 SAT1_CF  | blue | na |
| chrUn | 26399028 | 26399990 | 963 SAT1_CF  | blue | na |
| chrUn | 26400033 | 26400706 | 674 SAT1_CF  | blue | na |
| chrUn | 26400718 | 26401958 | 1241 SAT1_CF | blue | na |
| chrUn | 26401971 | 26402470 | 500 SAT1_CF  | blue | na |
| chrUn | 26402515 | 26402672 | 158 SAT1_CF  | blue | na |
| chrUn | 26402705 | 26404007 | 1303 SAT1_CF | blue | na |
| chrUn | 26404019 | 26404502 | 484 SAT1_CF  | blue | na |
| chrUn | 26404554 | 26404742 | 189 SAT1_CF  | blue | na |
| chrUn | 26404753 | 26405273 | 521 SAT1_CF  | blue | na |
| chrUn | 26405294 | 26407628 | 2335 SAT1_CF | blue | na |
| chrUn | 26407696 | 26408051 | 356 SAT1_CF  | blue | na |
| chrUn | 26408065 | 26409802 | 1738 SAT1_CF | blue | na |
| chrUn | 26409815 | 26411650 | 1836 SAT1_CF | blue | na |
| chrUn | 26411663 | 26411978 | 316 SAT1_CF  | blue | na |
| chrUn | 26412031 | 26412882 | 852 SAT1_CF  | blue | na |
| chrUn | 26412924 | 26414033 | 1110 SAT1_CF | blue | na |
| chrUn | 26414077 | 26415274 | 1198 SAT1_CF | blue | na |
| chrUn | 26415355 | 26415917 | 563 SAT1_CF  | blue | na |
| chrUn | 26415929 | 26417059 | 1131 SAT1_CF | blue | na |
| chrUn | 26417176 | 26417684 | 509 SAT1_CF  | blue | na |
| chrUn | 26417712 | 26419600 | 1889 SAT1_CF | blue | na |
| chrUn | 26419622 | 26420166 | 545 SAT1_CF  | blue | na |
| chrUn | 26420209 | 26420743 | 535 SAT1_CF  | blue | na |
| chrUn | 26420800 | 26421336 | 537 SAT1_CF  | blue | na |
| chrUn | 26421350 | 26421460 | 111 SAT1_CF  | blue | na |
| chrUn | 26421478 | 26421980 | 503 SAT1_CF  | blue | na |
| chrUn | 26421993 | 26422533 | 541 SAT1_CF  | blue | na |
| chrUn | 26422615 | 26423162 | 548 SAT1_CF  | blue | na |
| chrUn | 26423176 | 26424054 | 879 SAT1_CF  | blue | na |
| chrUn | 26424097 | 26424643 | 547 SAT1_CF  | blue | na |
| chrUn | 26424664 | 26424772 | 109 SAT1_CF  | blue | na |
| chrUn | 26424785 | 26425304 | 520 SAT1_CF  | blue | na |

|       |          |          |              |      |    |
|-------|----------|----------|--------------|------|----|
| chrUn | 26425325 | 26426247 | 923 SAT1_CF  | blue | na |
| chrUn | 26426291 | 26427252 | 962 SAT1_CF  | blue | na |
| chrUn | 26427297 | 26427962 | 666 SAT1_CF  | blue | na |
| chrUn | 26427984 | 26429254 | 1271 SAT1_CF | blue | na |
| chrUn | 26429297 | 26429963 | 667 SAT1_CF  | blue | na |
| chrUn | 26429976 | 26431158 | 1183 SAT1_CF | blue | na |
| chrUn | 26431179 | 26431930 | 752 SAT1_CF  | blue | na |
| chrUn | 26431951 | 26432059 | 109 SAT1_CF  | blue | na |
| chrUn | 26432072 | 26432547 | 476 SAT1_CF  | blue | na |
| chrUn | 26432618 | 26433290 | 673 SAT1_CF  | blue | na |
| chrUn | 26433302 | 26433989 | 688 SAT1_CF  | blue | na |
| chrUn | 26434001 | 26434684 | 684 SAT1_CF  | blue | na |
| chrUn | 26434698 | 26435196 | 499 SAT1_CF  | blue | na |
| chrUn | 26435234 | 26436270 | 1037 SAT1_CF | blue | na |
| chrUn | 26436282 | 26436833 | 552 SAT1_CF  | blue | na |
| chrUn | 26436861 | 26437055 | 195 SAT1_CF  | blue | na |
| chrUn | 26437098 | 26437662 | 565 SAT1_CF  | blue | na |
| chrUn | 26437706 | 26439021 | 1316 SAT1_CF | blue | na |
| chrUn | 26439036 | 26439712 | 677 SAT1_CF  | blue | na |
| chrUn | 26439725 | 26440226 | 502 SAT1_CF  | blue | na |
| chrUn | 26443778 | 26444737 | 960 SAT1_CF  | blue | na |
| chrUn | 26444816 | 26445780 | 965 SAT1_CF  | blue | na |
| chrUn | 26445823 | 26447047 | 1225 SAT1_CF | blue | na |
| chrUn | 26447082 | 26448321 | 1240 SAT1_CF | blue | na |
| chrUn | 26448437 | 26449217 | 781 SAT1_CF  | blue | na |
| chrUn | 26449278 | 26449940 | 663 SAT1_CF  | blue | na |
| chrUn | 26449952 | 26450583 | 632 SAT1_CF  | blue | na |
| chrUn | 26450605 | 26450713 | 109 SAT1_CF  | blue | na |
| chrUn | 26450725 | 26451226 | 502 SAT1_CF  | blue | na |
| chrUn | 26451271 | 26451427 | 157 SAT1_CF  | blue | na |
| chrUn | 26451455 | 26453112 | 1658 SAT1_CF | blue | na |
| chrUn | 26453154 | 26454711 | 1558 SAT1_CF | blue | na |
| chrUn | 26454724 | 26455225 | 502 SAT1_CF  | blue | na |
| chrUn | 26455264 | 26455904 | 641 SAT1_CF  | blue | na |
| chrUn | 26455931 | 26457820 | 1890 SAT1_CF | blue | na |
| chrUn | 26457841 | 26458480 | 640 SAT1_CF  | blue | na |
| chrUn | 26458501 | 26460538 | 2038 SAT1_CF | blue | na |
| chrUn | 26460580 | 26461945 | 1366 SAT1_CF | blue | na |
| chrUn | 26461958 | 26462458 | 501 SAT1_CF  | blue | na |
| chrUn | 26462496 | 26463264 | 769 SAT1_CF  | blue | na |
| chrUn | 26463285 | 26463363 | 79 SAT1_CF   | blue | na |
| chrUn | 26463378 | 26463887 | 510 SAT1_CF  | blue | na |



|       |          |          |              |      |    |
|-------|----------|----------|--------------|------|----|
| chrUn | 26463913 | 26464069 | 157 SAT1_CF  | blue | na |
| chrUn | 26464134 | 26465451 | 1318 SAT1_CF | blue | na |
| chrUn | 26465497 | 26466999 | 1503 SAT1_CF | blue | na |
| chrUn | 26467011 | 26468570 | 1560 SAT1_CF | blue | na |
| chrUn | 26468712 | 26469258 | 547 SAT1_CF  | blue | na |
| chrUn | 26469301 | 26470082 | 782 SAT1_CF  | blue | na |
| chrUn | 26470124 | 26470986 | 863 SAT1_CF  | blue | na |
| chrUn | 26470998 | 26472233 | 1236 SAT1_CF | blue | na |
| chrUn | 26472276 | 26472822 | 547 SAT1_CF  | blue | na |
| chrUn | 26472879 | 26473546 | 668 SAT1_CF  | blue | na |
| chrUn | 26473558 | 26474320 | 763 SAT1_CF  | blue | na |
| chrUn | 26474332 | 26474833 | 502 SAT1_CF  | blue | na |
| chrUn | 26474873 | 26475255 | 383 SAT1_CF  | blue | na |
| chrUn | 26475283 | 26476354 | 1072 SAT1_CF | blue | na |
| chrUn | 26476370 | 26476910 | 541 SAT1_CF  | blue | na |
| chrUn | 26476953 | 26477626 | 674 SAT1_CF  | blue | na |
| chrUn | 26477638 | 26478397 | 760 SAT1_CF  | blue | na |
| chrUn | 26478417 | 26478911 | 495 SAT1_CF  | blue | na |
| chrUn | 26478951 | 26479908 | 958 SAT1_CF  | blue | na |
| chrUn | 26479952 | 26480952 | 1001 SAT1_CF | blue | na |
| chrUn | 26480995 | 26481659 | 665 SAT1_CF  | blue | na |
| chrUn | 26481672 | 26482172 | 501 SAT1_CF  | blue | na |
| chrUn | 26482212 | 26483134 | 923 SAT1_CF  | blue | na |
| chrUn | 26483163 | 26483363 | 201 SAT1_CF  | blue | na |
| chrUn | 26483622 | 26484281 | 660 SAT1_CF  | blue | na |
| chrUn | 26484331 | 26485184 | 854 SAT1_CF  | blue | na |
| chrUn | 26485196 | 26486068 | 873 SAT1_CF  | blue | na |
| chrUn | 26486082 | 26487345 | 1264 SAT1_CF | blue | na |
| chrUn | 26487372 | 26488589 | 1218 SAT1_CF | blue | na |
| chrUn | 26488632 | 26489297 | 666 SAT1_CF  | blue | na |
| chrUn | 26489310 | 26489811 | 502 SAT1_CF  | blue | na |
| chrUn | 26489851 | 26491123 | 1273 SAT1_CF | blue | na |
| chrUn | 26491161 | 26491692 | 532 SAT1_CF  | blue | na |
| chrUn | 26491744 | 26492593 | 850 SAT1_CF  | blue | na |
| chrUn | 26492615 | 26493655 | 1041 SAT1_CF | blue | na |
| chrUn | 26493697 | 26495777 | 2081 SAT1_CF | blue | na |
| chrUn | 26495835 | 26495968 | 134 SAT1_CF  | blue | na |
| chrUn | 26495996 | 26497036 | 1041 SAT1_CF | blue | na |
| chrUn | 26497064 | 26497694 | 631 SAT1_CF  | blue | na |
| chrUn | 26497737 | 26498289 | 553 SAT1_CF  | blue | na |
| chrUn | 26498310 | 26498629 | 320 SAT1_CF  | blue | na |
| chrUn | 26498641 | 26499327 | 687 SAT1_CF  | blue | na |

|       |          |          |              |      |    |
|-------|----------|----------|--------------|------|----|
| chrUn | 26499338 | 26499840 | 503 SAT1_CF  | blue | na |
| chrUn | 26499876 | 26500249 | 374 SAT1_CF  | blue | na |
| chrUn | 26500292 | 26500838 | 547 SAT1_CF  | blue | na |
| chrUn | 26500866 | 26501039 | 174 SAT1_CF  | blue | na |
| chrUn | 26501117 | 26502287 | 1171 SAT1_CF | blue | na |
| chrUn | 26502368 | 26504807 | 2440 SAT1_CF | blue | na |
| chrUn | 26504821 | 26505312 | 492 SAT1_CF  | blue | na |
| chrUn | 26505323 | 26506005 | 683 SAT1_CF  | blue | na |
| chrUn | 26506017 | 26507699 | 1683 SAT1_CF | blue | na |
| chrUn | 26507945 | 26508972 | 1028 SAT1_CF | blue | na |
| chrUn | 26508997 | 26509100 | 104 SAT1_CF  | blue | na |
| chrUn | 26509113 | 26509634 | 522 SAT1_CF  | blue | na |
| chrUn | 26509655 | 26510055 | 401 SAT1_CF  | blue | na |
| chrUn | 26510066 | 26511760 | 1695 SAT1_CF | blue | na |
| chrUn | 26511774 | 26513581 | 1808 SAT1_CF | blue | na |
| chrUn | 26513623 | 26514956 | 1334 SAT1_CF | blue | na |
| chrUn | 26514969 | 26515650 | 682 SAT1_CF  | blue | na |
| chrUn | 26515663 | 26516547 | 885 SAT1_CF  | blue | na |
| chrUn | 26516569 | 26517252 | 684 SAT1_CF  | blue | na |
| chrUn | 26517264 | 26517818 | 555 SAT1_CF  | blue | na |
| chrUn | 26517873 | 26517947 | 75 SAT1_CF   | blue | na |
| chrUn | 26517966 | 26518459 | 494 SAT1_CF  | blue | na |
| chrUn | 26518546 | 26519458 | 913 SAT1_CF  | blue | na |
| chrUn | 26519537 | 26520500 | 964 SAT1_CF  | blue | na |
| chrUn | 26520543 | 26521912 | 1370 SAT1_CF | blue | na |
| chrUn | 26521924 | 26522607 | 684 SAT1_CF  | blue | na |
| chrUn | 26522619 | 26523170 | 552 SAT1_CF  | blue | na |
| chrUn | 26523198 | 26523392 | 195 SAT1_CF  | blue | na |
| chrUn | 26523435 | 26523997 | 563 SAT1_CF  | blue | na |
| chrUn | 26524041 | 26525889 | 1849 SAT1_CF | blue | na |
| chrUn | 26526141 | 26526277 | 137 SAT1_CF  | blue | na |
| chrUn | 26526290 | 26526790 | 501 SAT1_CF  | blue | na |
| chrUn | 26526843 | 26527718 | 876 SAT1_CF  | blue | na |
| chrUn | 26527745 | 26528524 | 780 SAT1_CF  | blue | na |
| chrUn | 26528546 | 26532207 | 3662 SAT1_CF | blue | na |
| chrUn | 26532240 | 26534304 | 2065 SAT1_CF | blue | na |
| chrUn | 26534316 | 26534999 | 684 SAT1_CF  | blue | na |
| chrUn | 26535012 | 26535513 | 502 SAT1_CF  | blue | na |
| chrUn | 26535571 | 26535703 | 133 SAT1_CF  | blue | na |
| chrUn | 26535731 | 26536240 | 510 SAT1_CF  | blue | na |
| chrUn | 26536283 | 26536844 | 562 SAT1_CF  | blue | na |
| chrUn | 26536872 | 26537502 | 631 SAT1_CF  | blue | na |

|       |          |          |              |      |    |
|-------|----------|----------|--------------|------|----|
| chrUn | 26537545 | 26538098 | 554 SAT1_CF  | blue | na |
| chrUn | 26538119 | 26538438 | 320 SAT1_CF  | blue | na |
| chrUn | 26538450 | 26539136 | 687 SAT1_CF  | blue | na |
| chrUn | 26539147 | 26539649 | 503 SAT1_CF  | blue | na |
| chrUn | 26539685 | 26540058 | 374 SAT1_CF  | blue | na |
| chrUn | 26540101 | 26541118 | 1018 SAT1_CF | blue | na |
| chrUn | 26541146 | 26542770 | 1625 SAT1_CF | blue | na |
| chrUn | 26542813 | 26543490 | 678 SAT1_CF  | blue | na |
| chrUn | 26543502 | 26544056 | 555 SAT1_CF  | blue | na |
| chrUn | 26544113 | 26544185 | 73 SAT1_CF   | blue | na |
| chrUn | 26544198 | 26544898 | 701 SAT1_CF  | blue | na |
| chrUn | 26544926 | 26545436 | 511 SAT1_CF  | blue | na |
| chrUn | 26545504 | 26546749 | 1246 SAT1_CF | blue | na |
| chrUn | 26546760 | 26547308 | 549 SAT1_CF  | blue | na |
| chrUn | 26547425 | 26549064 | 1640 SAT1_CF | blue | na |
| chrUn | 26549076 | 26549992 | 917 SAT1_CF  | blue | na |
| chrUn | 26550005 | 26550687 | 683 SAT1_CF  | blue | na |
| chrUn | 26550700 | 26551219 | 520 SAT1_CF  | blue | na |
| chrUn | 26551236 | 26552134 | 899 SAT1_CF  | blue | na |
| chrUn | 26552166 | 26553020 | 855 SAT1_CF  | blue | na |
| chrUn | 26553062 | 26553792 | 731 SAT1_CF  | blue | na |
| chrUn | 26553808 | 26553921 | 114 SAT1_CF  | blue | na |
| chrUn | 26553933 | 26554475 | 543 SAT1_CF  | blue | na |
| chrUn | 26554592 | 26556260 | 1669 SAT1_CF | blue | na |
| chrUn | 26556272 | 26556969 | 698 SAT1_CF  | blue | na |
| chrUn | 26556987 | 26557489 | 503 SAT1_CF  | blue | na |
| chrUn | 26557529 | 26558486 | 958 SAT1_CF  | blue | na |
| chrUn | 26558527 | 26558699 | 173 SAT1_CF  | blue | na |
| chrUn | 26558711 | 26559349 | 639 SAT1_CF  | blue | na |
| chrUn | 26559361 | 26560042 | 682 SAT1_CF  | blue | na |
| chrUn | 26560055 | 26560538 | 484 SAT1_CF  | blue | na |
| chrUn | 26560621 | 26560756 | 136 SAT1_CF  | blue | na |
| chrUn | 26560784 | 26561295 | 512 SAT1_CF  | blue | na |
| chrUn | 26561339 | 26561903 | 565 SAT1_CF  | blue | na |
| chrUn | 26561930 | 26562560 | 631 SAT1_CF  | blue | na |
| chrUn | 26562603 | 26563149 | 547 SAT1_CF  | blue | na |
| chrUn | 26563170 | 26563278 | 109 SAT1_CF  | blue | na |
| chrUn | 26563290 | 26564068 | 779 SAT1_CF  | blue | na |
| chrUn | 26564133 | 26564729 | 597 SAT1_CF  | blue | na |
| chrUn | 26564750 | 26566234 | 1485 SAT1_CF | blue | na |
| chrUn | 26566263 | 26566787 | 525 SAT1_CF  | blue | na |
| chrUn | 26566830 | 26567507 | 678 SAT1_CF  | blue | na |

|       |          |          |              |        |    |
|-------|----------|----------|--------------|--------|----|
| chrUn | 26567519 | 26568228 | 710 SAT1_CF  | blue   | na |
| chrUn | 26568285 | 26568357 | 73 SAT1_CF   | blue   | na |
| chrUn | 26568369 | 26568871 | 503 SAT1_CF  | blue   | na |
| chrUn | 26568924 | 26569832 | 909 SAT1_CF  | blue   | na |
| chrUn | 26569913 | 26572207 | 2295 SAT1_CF | blue   | na |
| chrUn | 26572275 | 26573608 | 1334 SAT1_CF | blue   | na |
| chrUn | 26573652 | 26574985 | 1334 SAT1_CF | blue   | na |
| chrUn | 26574997 | 26576662 | 1666 SAT1_CF | blue   | na |
| chrUn | 26576676 | 26577359 | 684 SAT1_CF  | blue   | na |
| chrUn | 26577372 | 26577872 | 501 SAT1_CF  | blue   | na |
| chrUn | 26577918 | 26579454 | 1537 SAT1_CF | blue   | na |
| chrUn | 26579481 | 26580701 | 1221 SAT1_CF | blue   | na |
| chrUn | 26580715 | 26581967 | 1253 SAT1_CF | blue   | na |
| chrUn | 26581988 | 26582197 | 210 SAT1_CF  | blue   | na |
| chrUn | 26583541 | 26583946 | 406 CarSat1  | red    | na |
| chrUn | 26583978 | 26584702 | 725 CarSat1  | red    | na |
| chrUn | 26584697 | 26585303 | 607 SAT1_CF  | blue   | na |
| chrUn | 26585325 | 26585711 | 387 SAT1_CF  | blue   | na |
| chrUn | 26585714 | 26586153 | 440 CarSat1  | red    | na |
| chrUn | 26586171 | 26586811 | 641 CarSat1  | red    | na |
| chrUn | 26586970 | 26587826 | 857 CarSat1  | red    | na |
| chrUn | 26587847 | 26589419 | 1573 CarSat1 | red    | na |
| chrUn | 26589449 | 26590153 | 705 CarSat1  | red    | na |
| chrUn | 26611434 | 26612203 | 770 Sat2CF   | purple | na |
| chrUn | 26611499 | 26612188 | 690 Sat2CF   | purple | na |
| chrUn | 26624950 | 26626080 | 1131 Sat2CF  | purple | na |
| chrUn | 26635210 | 26635541 | 332 Sat2CF   | purple | na |
| chrUn | 26635251 | 26635766 | 516 Sat2CF   | purple | na |
| chrUn | 26635637 | 26635814 | 178 Sat2CF   | purple | na |
| chrUn | 26635637 | 26635814 | 178 Sat2CF   | purple | na |
| chrUn | 26650682 | 26651481 | 800 Sat2CF   | purple | na |
| chrUn | 26651362 | 26651531 | 170 Sat2CF   | purple | na |
| chrUn | 26664172 | 26665423 | 1252 Sat2CF  | purple | na |
| chrUn | 26665263 | 26665451 | 189 Sat2CF   | purple | na |
| chrUn | 26668051 | 26669638 | 1588 CarSat1 | red    | na |
| chrUn | 26669665 | 26670073 | 409 CarSat1  | red    | na |
| chrUn | 26679630 | 26680313 | 684 CarSat1  | red    | na |
| chrUn | 26680331 | 26681849 | 1519 CarSat1 | red    | na |
| chrUn | 26681868 | 26682270 | 403 CarSat1  | red    | na |
| chrUn | 26682288 | 26682439 | 152 SAT1_CF  | blue   | na |
| chrUn | 26682480 | 26683640 | 1161 SAT1_CF | blue   | na |
| chrUn | 26683835 | 26683995 | 161 Sat2CF   | purple | na |

|       |          |          |      |         |        |    |
|-------|----------|----------|------|---------|--------|----|
| chrUn | 26683887 | 26684950 | 1064 | Sat2CF  | purple | na |
| chrUn | 26690907 | 26691591 | 685  | CarSat1 | red    | na |
| chrUn | 26691609 | 26692446 | 838  | CarSat1 | red    | na |
| chrUn | 26692636 | 26693227 | 592  | CarSat1 | red    | na |
| chrUn | 26703303 | 26704016 | 714  | CarSat1 | red    | na |
| chrUn | 26704211 | 26704357 | 147  | CarSat1 | red    | na |
| chrUn | 26704382 | 26707518 | 3137 | CarSat1 | red    | na |
| chrUn | 26707548 | 26709727 | 2180 | CarSat1 | red    | na |
| chrUn | 26709757 | 26710979 | 1223 | CarSat1 | red    | na |
| chrUn | 26711005 | 26712634 | 1630 | CarSat1 | red    | na |
| chrUn | 26712825 | 26714551 | 1727 | CarSat1 | red    | na |
| chrUn | 26714584 | 26715047 | 464  | CarSat1 | red    | na |
| chrUn | 26715238 | 26718197 | 2960 | CarSat1 | red    | na |
| chrUn | 26718388 | 26724745 | 6358 | CarSat1 | red    | na |
| chrUn | 26724775 | 26725477 | 703  | CarSat1 | red    | na |
| chrUn | 26725507 | 26726000 | 494  | CarSat1 | red    | na |
| chrUn | 26726025 | 26726949 | 925  | CarSat1 | red    | na |
| chrUn | 26726979 | 26727469 | 491  | CarSat1 | red    | na |
| chrUn | 26727502 | 26727669 | 168  | CarSat1 | red    | na |
| chrUn | 26727862 | 26728626 | 765  | CarSat1 | red    | na |
| chrUn | 26728656 | 26729353 | 698  | CarSat1 | red    | na |
| chrUn | 26729391 | 26730093 | 703  | CarSat1 | red    | na |
| chrUn | 26730123 | 26730617 | 495  | CarSat1 | red    | na |
| chrUn | 26730650 | 26731269 | 620  | CarSat1 | red    | na |
| chrUn | 26738113 | 26739333 | 1221 | Sat2CF  | purple | na |
| chrUn | 26784099 | 26785210 | 1112 | Sat2CF  | purple | na |
| chrUn | 26785052 | 26785253 | 202  | Sat2CF  | purple | na |
| chrUn | 26786882 | 26787293 | 412  | CarSat1 | red    | na |
| chrUn | 26788261 | 26789845 | 1585 | CarSat1 | red    | na |
| chrUn | 26789866 | 26790717 | 852  | CarSat1 | red    | na |
| chrUn | 26790738 | 26792896 | 2159 | CarSat1 | red    | na |
| chrUn | 26792891 | 26794434 | 1544 | SAT1_CF | blue   | na |
| chrUn | 26794476 | 26796610 | 2135 | SAT1_CF | blue   | na |
| chrUn | 26796623 | 26797590 | 968  | SAT1_CF | blue   | na |
| chrUn | 26797636 | 26798152 | 517  | SAT1_CF | blue   | na |
| chrUn | 26801502 | 26802037 | 536  | SAT1_CF | blue   | na |
| chrUn | 26802124 | 26802618 | 495  | SAT1_CF | blue   | na |
| chrUn | 26802647 | 26803316 | 670  | SAT1_CF | blue   | na |
| chrUn | 26803340 | 26805408 | 2069 | SAT1_CF | blue   | na |
| chrUn | 26805450 | 26807078 | 1629 | SAT1_CF | blue   | na |
| chrUn | 26807117 | 26807648 | 532  | SAT1_CF | blue   | na |
| chrUn | 26807660 | 26807766 | 107  | SAT1_CF | blue   | na |

|       |          |          |              |      |    |
|-------|----------|----------|--------------|------|----|
| chrUn | 26807790 | 26809250 | 1461 SAT1_CF | blue | na |
| chrUn | 26809266 | 26809532 | 267 SAT1_CF  | blue | na |
| chrUn | 26809611 | 26810158 | 548 SAT1_CF  | blue | na |
| chrUn | 26810171 | 26810566 | 396 SAT1_CF  | blue | na |
| chrUn | 26810630 | 26811110 | 481 SAT1_CF  | blue | na |
| chrUn | 26811122 | 26812665 | 1544 SAT1_CF | blue | na |
| chrUn | 26812707 | 26813251 | 545 SAT1_CF  | blue | na |
| chrUn | 26813289 | 26814515 | 1227 SAT1_CF | blue | na |
| chrUn | 26814597 | 26815102 | 506 SAT1_CF  | blue | na |
| chrUn | 26815115 | 26816208 | 1094 SAT1_CF | blue | na |
| chrUn | 26816219 | 26818296 | 2078 SAT1_CF | blue | na |
| chrUn | 26818319 | 26820821 | 2503 SAT1_CF | blue | na |
| chrUn | 26820868 | 26821382 | 515 SAT1_CF  | blue | na |
| chrUn | 26821402 | 26822079 | 678 SAT1_CF  | blue | na |
| chrUn | 26822122 | 26824069 | 1948 SAT1_CF | blue | na |
| chrUn | 26824081 | 26824756 | 676 SAT1_CF  | blue | na |
| chrUn | 26824799 | 26826391 | 1593 SAT1_CF | blue | na |
| chrUn | 26826439 | 26826838 | 400 SAT1_CF  | blue | na |
| chrUn | 26826878 | 26827377 | 500 SAT1_CF  | blue | na |
| chrUn | 26827391 | 26828665 | 1275 SAT1_CF | blue | na |
| chrUn | 26828686 | 26830737 | 2052 SAT1_CF | blue | na |
| chrUn | 26830781 | 26831301 | 521 SAT1_CF  | blue | na |
| chrUn | 26831313 | 26832910 | 1598 SAT1_CF | blue | na |
| chrUn | 26832933 | 26833784 | 852 SAT1_CF  | blue | na |
| chrUn | 26833826 | 26835675 | 1850 SAT1_CF | blue | na |
| chrUn | 26835696 | 26838182 | 2487 SAT1_CF | blue | na |
| chrUn | 26838260 | 26838769 | 510 SAT1_CF  | blue | na |
| chrUn | 26838836 | 26838922 | 87 SAT1_CF   | blue | na |
| chrUn | 26838972 | 26840092 | 1121 SAT1_CF | blue | na |
| chrUn | 26840104 | 26840213 | 110 SAT1_CF  | blue | na |
| chrUn | 26840233 | 26840779 | 547 SAT1_CF  | blue | na |
| chrUn | 26840822 | 26842632 | 1811 SAT1_CF | blue | na |
| chrUn | 26842680 | 26843181 | 502 SAT1_CF  | blue | na |
| chrUn | 26843193 | 26843964 | 772 SAT1_CF  | blue | na |
| chrUn | 26843986 | 26844537 | 552 SAT1_CF  | blue | na |
| chrUn | 26844580 | 26845933 | 1354 SAT1_CF | blue | na |
| chrUn | 26845945 | 26846050 | 106 SAT1_CF  | blue | na |
| chrUn | 26846074 | 26846565 | 492 SAT1_CF  | blue | na |
| chrUn | 26846632 | 26847087 | 456 SAT1_CF  | blue | na |
| chrUn | 26847100 | 26847717 | 618 SAT1_CF  | blue | na |
| chrUn | 26847742 | 26848296 | 555 SAT1_CF  | blue | na |
| chrUn | 26848308 | 26849634 | 1327 SAT1_CF | blue | na |

|       |          |          |              |      |    |
|-------|----------|----------|--------------|------|----|
| chrUn | 26849678 | 26850102 | 425 SAT1_CF  | blue | na |
| chrUn | 26850123 | 26850631 | 509 SAT1_CF  | blue | na |
| chrUn | 26850644 | 26851542 | 899 SAT1_CF  | blue | na |
| chrUn | 26851571 | 26852089 | 519 SAT1_CF  | blue | na |
| chrUn | 26852106 | 26855028 | 2923 SAT1_CF | blue | na |
| chrUn | 26855057 | 26855576 | 520 SAT1_CF  | blue | na |
| chrUn | 26855594 | 26856265 | 672 SAT1_CF  | blue | na |
| chrUn | 26856308 | 26857419 | 1112 SAT1_CF | blue | na |
| chrUn | 26857462 | 26858045 | 584 SAT1_CF  | blue | na |
| chrUn | 26858057 | 26859655 | 1599 SAT1_CF | blue | na |
| chrUn | 26859678 | 26860527 | 850 SAT1_CF  | blue | na |
| chrUn | 26860569 | 26862001 | 1433 SAT1_CF | blue | na |
| chrUn | 26862014 | 26862418 | 405 SAT1_CF  | blue | na |
| chrUn | 26862456 | 26863674 | 1219 SAT1_CF | blue | na |
| chrUn | 26863706 | 26864209 | 504 SAT1_CF  | blue | na |
| chrUn | 26864242 | 26864946 | 705 SAT1_CF  | blue | na |
| chrUn | 26864959 | 26865060 | 102 SAT1_CF  | blue | na |
| chrUn | 26865088 | 26867162 | 2075 SAT1_CF | blue | na |
| chrUn | 26867232 | 26867785 | 554 SAT1_CF  | blue | na |
| chrUn | 26867797 | 26868479 | 683 SAT1_CF  | blue | na |
| chrUn | 26868490 | 26868975 | 486 SAT1_CF  | blue | na |
| chrUn | 26868989 | 26871441 | 2453 SAT1_CF | blue | na |
| chrUn | 26871455 | 26871772 | 318 SAT1_CF  | blue | na |
| chrUn | 26871825 | 26873016 | 1192 SAT1_CF | blue | na |
| chrUn | 26873033 | 26873716 | 684 SAT1_CF  | blue | na |
| chrUn | 26873727 | 26875448 | 1722 SAT1_CF | blue | na |
| chrUn | 26875459 | 26877019 | 1561 SAT1_CF | blue | na |
| chrUn | 26877064 | 26877563 | 500 SAT1_CF  | blue | na |
| chrUn | 26877577 | 26878258 | 682 SAT1_CF  | blue | na |
| chrUn | 26878270 | 26878877 | 608 SAT1_CF  | blue | na |
| chrUn | 26878889 | 26879564 | 676 SAT1_CF  | blue | na |
| chrUn | 26879607 | 26881643 | 2037 SAT1_CF | blue | na |
| chrUn | 26881690 | 26882191 | 502 SAT1_CF  | blue | na |
| chrUn | 26882202 | 26883286 | 1085 SAT1_CF | blue | na |
| chrUn | 26883312 | 26884687 | 1376 SAT1_CF | blue | na |
| chrUn | 26884731 | 26885273 | 543 SAT1_CF  | blue | na |
| chrUn | 26885300 | 26886619 | 1320 SAT1_CF | blue | na |
| chrUn | 26886687 | 26887167 | 481 SAT1_CF  | blue | na |
| chrUn | 26887180 | 26887786 | 607 SAT1_CF  | blue | na |
| chrUn | 26887798 | 26888471 | 674 SAT1_CF  | blue | na |
| chrUn | 26888514 | 26889053 | 540 SAT1_CF  | blue | na |
| chrUn | 26889071 | 26890581 | 1511 SAT1_CF | blue | na |

|       |          |          |              |      |    |
|-------|----------|----------|--------------|------|----|
| chrUn | 26890594 | 26891095 | 502 SAT1_CF  | blue | na |
| chrUn | 26891143 | 26891811 | 669 SAT1_CF  | blue | na |
| chrUn | 26891890 | 26892845 | 956 SAT1_CF  | blue | na |
| chrUn | 26892872 | 26893383 | 512 SAT1_CF  | blue | na |
| chrUn | 26893403 | 26894008 | 606 SAT1_CF  | blue | na |
| chrUn | 26894019 | 26894713 | 695 SAT1_CF  | blue | na |
| chrUn | 26894726 | 26895615 | 890 SAT1_CF  | blue | na |
| chrUn | 26895628 | 26896988 | 1361 SAT1_CF | blue | na |
| chrUn | 26897001 | 26898836 | 1836 SAT1_CF | blue | na |
| chrUn | 26898870 | 26899391 | 522 SAT1_CF  | blue | na |
| chrUn | 26899404 | 26900010 | 607 SAT1_CF  | blue | na |
| chrUn | 26900022 | 26900131 | 110 SAT1_CF  | blue | na |
| chrUn | 26900151 | 26902521 | 2371 SAT1_CF | blue | na |
| chrUn | 26902538 | 26903057 | 520 SAT1_CF  | blue | na |
| chrUn | 26903070 | 26903752 | 683 SAT1_CF  | blue | na |
| chrUn | 26903764 | 26907048 | 3285 SAT1_CF | blue | na |
| chrUn | 26907088 | 26907587 | 500 SAT1_CF  | blue | na |
| chrUn | 26907600 | 26907716 | 117 SAT1_CF  | blue | na |
| chrUn | 26907730 | 26908206 | 477 SAT1_CF  | blue | na |
| chrUn | 26908218 | 26908320 | 103 SAT1_CF  | blue | na |
| chrUn | 26908349 | 26908895 | 547 SAT1_CF  | blue | na |
| chrUn | 26908938 | 26910085 | 1148 SAT1_CF | blue | na |
| chrUn | 26910098 | 26910817 | 720 SAT1_CF  | blue | na |
| chrUn | 26910871 | 26912806 | 1936 SAT1_CF | blue | na |
| chrUn | 26912885 | 26913370 | 486 SAT1_CF  | blue | na |
| chrUn | 26913404 | 26913804 | 401 SAT1_CF  | blue | na |
| chrUn | 26913825 | 26914344 | 520 SAT1_CF  | blue | na |
| chrUn | 26914357 | 26915039 | 683 SAT1_CF  | blue | na |
| chrUn | 26915063 | 26915713 | 651 SAT1_CF  | blue | na |
| chrUn | 26915731 | 26915772 | 42 SAT1_CF   | blue | na |
| chrUn | 26915796 | 26916308 | 513 SAT1_CF  | blue | na |
| chrUn | 26916325 | 26916568 | 244 SAT1_CF  | blue | na |
| chrUn | 26916646 | 26917201 | 556 SAT1_CF  | blue | na |
| chrUn | 26917235 | 26917998 | 764 SAT1_CF  | blue | na |
| chrUn | 26918042 | 26918828 | 787 SAT1_CF  | blue | na |
| chrUn | 26918872 | 26919333 | 462 SAT1_CF  | blue | na |
| chrUn | 26919373 | 26919873 | 501 SAT1_CF  | blue | na |
| chrUn | 26919886 | 26920569 | 684 SAT1_CF  | blue | na |
| chrUn | 26920581 | 26921004 | 424 SAT1_CF  | blue | na |
| chrUn | 26921027 | 26921548 | 522 SAT1_CF  | blue | na |
| chrUn | 26921561 | 26922166 | 606 SAT1_CF  | blue | na |
| chrUn | 26922178 | 26922287 | 110 SAT1_CF  | blue | na |



|       |          |          |              |      |    |
|-------|----------|----------|--------------|------|----|
| chrUn | 26922307 | 26924906 | 2600 SAT1_CF | blue | na |
| chrUn | 26924984 | 26925496 | 513 SAT1_CF  | blue | na |
| chrUn | 26925524 | 26925660 | 137 SAT1_CF  | blue | na |
| chrUn | 26925746 | 26926227 | 482 SAT1_CF  | blue | na |
| chrUn | 26926240 | 26926923 | 684 SAT1_CF  | blue | na |
| chrUn | 26926935 | 26927602 | 668 SAT1_CF  | blue | na |
| chrUn | 26927645 | 26928364 | 720 SAT1_CF  | blue | na |
| chrUn | 26928443 | 26929006 | 564 SAT1_CF  | blue | na |
| chrUn | 26929034 | 26929170 | 137 SAT1_CF  | blue | na |
| chrUn | 26929236 | 26929738 | 503 SAT1_CF  | blue | na |
| chrUn | 26929880 | 26930393 | 514 SAT1_CF  | blue | na |
| chrUn | 26930437 | 26932249 | 1813 SAT1_CF | blue | na |
| chrUn | 26932261 | 26933582 | 1322 SAT1_CF | blue | na |
| chrUn | 26933661 | 26935849 | 2189 SAT1_CF | blue | na |
| chrUn | 26935897 | 26937306 | 1410 SAT1_CF | blue | na |
| chrUn | 26937330 | 26938538 | 1209 SAT1_CF | blue | na |
| chrUn | 26938618 | 26939127 | 510 SAT1_CF  | blue | na |
| chrUn | 26939194 | 26939280 | 87 SAT1_CF   | blue | na |
| chrUn | 26939330 | 26941163 | 1834 SAT1_CF | blue | na |
| chrUn | 26941242 | 26941805 | 564 SAT1_CF  | blue | na |
| chrUn | 26941833 | 26941969 | 137 SAT1_CF  | blue | na |
| chrUn | 26942035 | 26942577 | 543 SAT1_CF  | blue | na |
| chrUn | 26942620 | 26943583 | 964 SAT1_CF  | blue | na |
| chrUn | 26943627 | 26943711 | 85 SAT1_CF   | blue | na |
| chrUn | 26943724 | 26944428 | 705 SAT1_CF  | blue | na |
| chrUn | 26944462 | 26944958 | 497 SAT1_CF  | blue | na |
| chrUn | 26945014 | 26946254 | 1241 SAT1_CF | blue | na |
| chrUn | 26946302 | 26947262 | 961 SAT1_CF  | blue | na |
| chrUn | 26947317 | 26948833 | 1517 SAT1_CF | blue | na |
| chrUn | 26948850 | 26949984 | 1135 SAT1_CF | blue | na |
| chrUn | 26949996 | 26952308 | 2313 SAT1_CF | blue | na |
| chrUn | 26952337 | 26952856 | 520 SAT1_CF  | blue | na |
| chrUn | 26952870 | 26953554 | 685 SAT1_CF  | blue | na |
| chrUn | 26953566 | 26953675 | 110 SAT1_CF  | blue | na |
| chrUn | 26953695 | 26954898 | 1204 SAT1_CF | blue | na |
| chrUn | 26954942 | 26955943 | 1002 SAT1_CF | blue | na |
| chrUn | 26955956 | 26956634 | 679 SAT1_CF  | blue | na |
| chrUn | 26956658 | 26958086 | 1429 SAT1_CF | blue | na |
| chrUn | 26958102 | 26958345 | 244 SAT1_CF  | blue | na |
| chrUn | 26958389 | 26959621 | 1233 SAT1_CF | blue | na |
| chrUn | 26959664 | 26960628 | 965 SAT1_CF  | blue | na |
| chrUn | 26960654 | 26961460 | 807 SAT1_CF  | blue | na |

|       |          |          |              |      |    |
|-------|----------|----------|--------------|------|----|
| chrUn | 26961528 | 26962028 | 501 SAT1_CF  | blue | na |
| chrUn | 26962041 | 26962716 | 676 SAT1_CF  | blue | na |
| chrUn | 26962746 | 26963408 | 663 SAT1_CF  | blue | na |
| chrUn | 26963447 | 26964249 | 803 SAT1_CF  | blue | na |
| chrUn | 26964260 | 26965260 | 1001 SAT1_CF | blue | na |
| chrUn | 26965297 | 26965671 | 375 SAT1_CF  | blue | na |
| chrUn | 26965711 | 26966205 | 495 SAT1_CF  | blue | na |
| chrUn | 26966230 | 26966906 | 677 SAT1_CF  | blue | na |
| chrUn | 26966918 | 26967594 | 677 SAT1_CF  | blue | na |
| chrUn | 26967606 | 26968710 | 1105 SAT1_CF | blue | na |
| chrUn | 26968742 | 26969627 | 886 SAT1_CF  | blue | na |
| chrUn | 26969714 | 26970212 | 499 SAT1_CF  | blue | na |
| chrUn | 26970225 | 26971163 | 939 SAT1_CF  | blue | na |
| chrUn | 26971234 | 26971747 | 514 SAT1_CF  | blue | na |
| chrUn | 26971761 | 26973122 | 1362 SAT1_CF | blue | na |
| chrUn | 26973165 | 26974120 | 956 SAT1_CF  | blue | na |
| chrUn | 26974236 | 26975298 | 1063 SAT1_CF | blue | na |
| chrUn | 26975328 | 26975618 | 291 SAT1_CF  | blue | na |
| chrUn | 26975639 | 26976159 | 521 SAT1_CF  | blue | na |
| chrUn | 26976173 | 26976280 | 108 SAT1_CF  | blue | na |
| chrUn | 26976302 | 26976855 | 554 SAT1_CF  | blue | na |
| chrUn | 26976867 | 26976976 | 110 SAT1_CF  | blue | na |
| chrUn | 26976997 | 26977540 | 544 SAT1_CF  | blue | na |
| chrUn | 26977553 | 26978272 | 720 SAT1_CF  | blue | na |
| chrUn | 26978294 | 26980414 | 2121 SAT1_CF | blue | na |
| chrUn | 26980457 | 26980969 | 513 SAT1_CF  | blue | na |
| chrUn | 26980997 | 26981132 | 136 SAT1_CF  | blue | na |
| chrUn | 26981198 | 26983470 | 2273 SAT1_CF | blue | na |
| chrUn | 26983514 | 26984061 | 548 SAT1_CF  | blue | na |
| chrUn | 26984104 | 26984246 | 143 SAT1_CF  | blue | na |
| chrUn | 26984314 | 26984795 | 482 SAT1_CF  | blue | na |
| chrUn | 26984814 | 26984914 | 101 SAT1_CF  | blue | na |
| chrUn | 26984938 | 26985493 | 556 SAT1_CF  | blue | na |
| chrUn | 26985505 | 26986838 | 1334 SAT1_CF | blue | na |
| chrUn | 26986908 | 26988026 | 1119 SAT1_CF | blue | na |
| chrUn | 26988066 | 26988586 | 521 SAT1_CF  | blue | na |
| chrUn | 26988598 | 26989295 | 698 SAT1_CF  | blue | na |
| chrUn | 26989307 | 26990431 | 1125 SAT1_CF | blue | na |
| chrUn | 26990456 | 26990780 | 325 SAT1_CF  | blue | na |
| chrUn | 26990859 | 26991400 | 542 SAT1_CF  | blue | na |
| chrUn | 26991451 | 26992150 | 700 SAT1_CF  | blue | na |
| chrUn | 26992162 | 26993196 | 1035 SAT1_CF | blue | na |

|       |          |          |              |      |    |
|-------|----------|----------|--------------|------|----|
| chrUn | 26993258 | 26993800 | 543 SAT1_CF  | blue | na |
| chrUn | 26995205 | 26995722 | 518 SAT1_CF  | blue | na |
| chrUn | 26995790 | 26996310 | 521 SAT1_CF  | blue | na |
| chrUn | 26996322 | 26997009 | 688 SAT1_CF  | blue | na |
| chrUn | 26997021 | 26998145 | 1125 SAT1_CF | blue | na |
| chrUn | 26998170 | 26998494 | 325 SAT1_CF  | blue | na |
| chrUn | 26998573 | 26999114 | 542 SAT1_CF  | blue | na |
| chrUn | 26999165 | 26999864 | 700 SAT1_CF  | blue | na |
| chrUn | 26999876 | 27000708 | 833 SAT1_CF  | blue | na |
| chrUn | 27000736 | 27001298 | 563 SAT1_CF  | blue | na |
| chrUn | 27002391 | 27002694 | 304 SAT1_CF  | blue | na |
| chrUn | 27002964 | 27004737 | 1774 SAT1_CF | blue | na |
| chrUn | 27004779 | 27005325 | 547 SAT1_CF  | blue | na |
| chrUn | 27005382 | 27005901 | 520 SAT1_CF  | blue | na |
| chrUn | 27005996 | 27006132 | 137 SAT1_CF  | blue | na |
| chrUn | 27006147 | 27006669 | 523 SAT1_CF  | blue | na |
| chrUn | 27006697 | 27007202 | 506 SAT1_CF  | blue | na |
| chrUn | 27007244 | 27007860 | 617 SAT1_CF  | blue | na |
| chrUn | 27007873 | 27008723 | 851 SAT1_CF  | blue | na |
| chrUn | 27008735 | 27009421 | 687 SAT1_CF  | blue | na |
| chrUn | 27009439 | 27009982 | 544 SAT1_CF  | blue | na |
| chrUn | 27010026 | 27010294 | 269 SAT1_CF  | blue | na |
| chrUn | 27010322 | 27010950 | 629 SAT1_CF  | blue | na |
| chrUn | 27010979 | 27011593 | 615 SAT1_CF  | blue | na |
| chrUn | 27011680 | 27012030 | 351 SAT1_CF  | blue | na |
| chrUn | 27012049 | 27013009 | 961 SAT1_CF  | blue | na |
| chrUn | 27013054 | 27014386 | 1333 SAT1_CF | blue | na |
| chrUn | 27014398 | 27015044 | 647 SAT1_CF  | blue | na |
| chrUn | 27015057 | 27015819 | 763 SAT1_CF  | blue | na |
| chrUn | 27015831 | 27016327 | 497 SAT1_CF  | blue | na |
| chrUn | 27016350 | 27016456 | 107 SAT1_CF  | blue | na |
| chrUn | 27016469 | 27017013 | 545 SAT1_CF  | blue | na |
| chrUn | 27017090 | 27018148 | 1059 SAT1_CF | blue | na |
| chrUn | 27018203 | 27018348 | 146 SAT1_CF  | blue | na |
| chrUn | 27018373 | 27019018 | 646 SAT1_CF  | blue | na |
| chrUn | 27019031 | 27021248 | 2218 SAT1_CF | blue | na |
| chrUn | 27021260 | 27021815 | 556 SAT1_CF  | blue | na |
| chrUn | 27021836 | 27021935 | 100 SAT1_CF  | blue | na |
| chrUn | 27021957 | 27022534 | 578 SAT1_CF  | blue | na |
| chrUn | 27022554 | 27022856 | 303 SAT1_CF  | blue | na |
| chrUn | 27022869 | 27024022 | 1154 SAT1_CF | blue | na |
| chrUn | 27024035 | 27024737 | 703 SAT1_CF  | blue | na |

|       |          |          |              |      |    |
|-------|----------|----------|--------------|------|----|
| chrUn | 27024769 | 27025273 | 505 SAT1_CF  | blue | na |
| chrUn | 27025305 | 27025964 | 660 SAT1_CF  | blue | na |
| chrUn | 27025976 | 27026478 | 503 SAT1_CF  | blue | na |
| chrUn | 27026491 | 27027819 | 1329 SAT1_CF | blue | na |
| chrUn | 27027841 | 27028491 | 651 SAT1_CF  | blue | na |
| chrUn | 27028505 | 27029025 | 521 SAT1_CF  | blue | na |
| chrUn | 27029091 | 27029397 | 307 SAT1_CF  | blue | na |
| chrUn | 27029440 | 27030765 | 1326 SAT1_CF | blue | na |
| chrUn | 27030783 | 27031872 | 1090 SAT1_CF | blue | na |
| chrUn | 27031912 | 27032314 | 403 SAT1_CF  | blue | na |
| chrUn | 27032326 | 27032939 | 614 SAT1_CF  | blue | na |
| chrUn | 27032950 | 27033568 | 619 SAT1_CF  | blue | na |
| chrUn | 27033589 | 27033692 | 104 SAT1_CF  | blue | na |
| chrUn | 27033710 | 27034210 | 501 SAT1_CF  | blue | na |
| chrUn | 27034297 | 27035245 | 949 SAT1_CF  | blue | na |
| chrUn | 27035266 | 27035374 | 109 SAT1_CF  | blue | na |
| chrUn | 27035387 | 27035860 | 474 SAT1_CF  | blue | na |
| chrUn | 27035920 | 27036101 | 182 SAT1_CF  | blue | na |
| chrUn | 27036283 | 27037500 | 1218 SAT1_CF | blue | na |
| chrUn | 27037528 | 27038785 | 1258 SAT1_CF | blue | na |
| chrUn | 27038806 | 27039447 | 642 SAT1_CF  | blue | na |
| chrUn | 27039473 | 27039629 | 157 SAT1_CF  | blue | na |
| chrUn | 27039644 | 27040275 | 632 SAT1_CF  | blue | na |
| chrUn | 27040286 | 27040968 | 683 SAT1_CF  | blue | na |
| chrUn | 27040991 | 27041682 | 692 SAT1_CF  | blue | na |
| chrUn | 27041906 | 27042418 | 513 SAT1_CF  | blue | na |
| chrUn | 27042437 | 27043219 | 783 SAT1_CF  | blue | na |
| chrUn | 27043232 | 27043733 | 502 SAT1_CF  | blue | na |
| chrUn | 27043786 | 27044174 | 389 SAT1_CF  | blue | na |
| chrUn | 27044211 | 27044972 | 762 SAT1_CF  | blue | na |
| chrUn | 27044999 | 27045152 | 154 SAT1_CF  | blue | na |
| chrUn | 27045196 | 27046530 | 1335 SAT1_CF | blue | na |
| chrUn | 27046543 | 27047045 | 503 SAT1_CF  | blue | na |
| chrUn | 27047131 | 27049194 | 2064 SAT1_CF | blue | na |
| chrUn | 27049219 | 27049283 | 65 SAT1_CF   | blue | na |
| chrUn | 27049301 | 27050228 | 928 SAT1_CF  | blue | na |
| chrUn | 27050240 | 27050923 | 684 SAT1_CF  | blue | na |
| chrUn | 27050935 | 27051565 | 631 SAT1_CF  | blue | na |
| chrUn | 27051634 | 27052191 | 558 SAT1_CF  | blue | na |
| chrUn | 27052253 | 27052812 | 560 SAT1_CF  | blue | na |
| chrUn | 27052872 | 27053053 | 182 SAT1_CF  | blue | na |
| chrUn | 27053234 | 27053436 | 203 SAT1_CF  | blue | na |

|       |          |          |              |      |    |
|-------|----------|----------|--------------|------|----|
| chrUn | 27053479 | 27055266 | 1788 SAT1_CF | blue | na |
| chrUn | 27055278 | 27056855 | 1578 SAT1_CF | blue | na |
| chrUn | 27056935 | 27057972 | 1038 SAT1_CF | blue | na |
| chrUn | 27058014 | 27059153 | 1140 SAT1_CF | blue | na |
| chrUn | 27059166 | 27060285 | 1120 SAT1_CF | blue | na |
| chrUn | 27060297 | 27061000 | 704 SAT1_CF  | blue | na |
| chrUn | 27061013 | 27061534 | 522 SAT1_CF  | blue | na |
| chrUn | 27061551 | 27061924 | 374 SAT1_CF  | blue | na |
| chrUn | 27061967 | 27063121 | 1155 SAT1_CF | blue | na |
| chrUn | 27063164 | 27063716 | 553 SAT1_CF  | blue | na |
| chrUn | 27063728 | 27063796 | 69 SAT1_CF   | blue | na |
| chrUn | 27063823 | 27064344 | 522 SAT1_CF  | blue | na |
| chrUn | 27064614 | 27066738 | 2125 SAT1_CF | blue | na |
| chrUn | 27066750 | 27067432 | 683 SAT1_CF  | blue | na |
| chrUn | 27067445 | 27069197 | 1753 SAT1_CF | blue | na |
| chrUn | 27069215 | 27069737 | 523 SAT1_CF  | blue | na |
| chrUn | 27069789 | 27070568 | 780 SAT1_CF  | blue | na |
| chrUn | 27070582 | 27071278 | 697 SAT1_CF  | blue | na |
| chrUn | 27071322 | 27072312 | 991 SAT1_CF  | blue | na |
| chrUn | 27072393 | 27072955 | 563 SAT1_CF  | blue | na |
| chrUn | 27072999 | 27074332 | 1334 SAT1_CF | blue | na |
| chrUn | 27074344 | 27074864 | 521 SAT1_CF  | blue | na |
| chrUn | 27074889 | 27075047 | 159 SAT1_CF  | blue | na |
| chrUn | 27075074 | 27077225 | 2152 SAT1_CF | blue | na |
| chrUn | 27077252 | 27077772 | 521 SAT1_CF  | blue | na |
| chrUn | 27077797 | 27077953 | 157 SAT1_CF  | blue | na |
| chrUn | 27077968 | 27078489 | 522 SAT1_CF  | blue | na |
| chrUn | 27078522 | 27079476 | 955 SAT1_CF  | blue | na |
| chrUn | 27079496 | 27079991 | 496 SAT1_CF  | blue | na |
| chrUn | 27080077 | 27080251 | 175 SAT1_CF  | blue | na |
| chrUn | 27080332 | 27081577 | 1246 SAT1_CF | blue | na |
| chrUn | 27081589 | 27082141 | 553 SAT1_CF  | blue | na |
| chrUn | 27082162 | 27083178 | 1017 SAT1_CF | blue | na |
| chrUn | 27083190 | 27083821 | 632 SAT1_CF  | blue | na |
| chrUn | 27083844 | 27083949 | 106 SAT1_CF  | blue | na |
| chrUn | 27083962 | 27085581 | 1620 SAT1_CF | blue | na |
| chrUn | 27085606 | 27086410 | 805 SAT1_CF  | blue | na |
| chrUn | 27086437 | 27087067 | 631 SAT1_CF  | blue | na |
| chrUn | 27087110 | 27087786 | 677 SAT1_CF  | blue | na |
| chrUn | 27087800 | 27089252 | 1453 SAT1_CF | blue | na |
| chrUn | 27089265 | 27089785 | 521 SAT1_CF  | blue | na |
| chrUn | 27089853 | 27090206 | 354 SAT1_CF  | blue | na |

|       |          |          |              |      |    |
|-------|----------|----------|--------------|------|----|
| chrUn | 27090218 | 27090765 | 548 SAT1_CF  | blue | na |
| chrUn | 27090844 | 27091625 | 782 SAT1_CF  | blue | na |
| chrUn | 27091667 | 27092528 | 862 SAT1_CF  | blue | na |
| chrUn | 27092540 | 27093058 | 519 SAT1_CF  | blue | na |
| chrUn | 27093077 | 27093834 | 758 SAT1_CF  | blue | na |
| chrUn | 27093861 | 27094361 | 501 SAT1_CF  | blue | na |
| chrUn | 27094407 | 27094563 | 157 SAT1_CF  | blue | na |
| chrUn | 27094591 | 27095092 | 502 SAT1_CF  | blue | na |
| chrUn | 27095137 | 27095226 | 90 SAT1_CF   | blue | na |
| chrUn | 27101237 | 27101719 | 483 SAT1_CF  | blue | na |
| chrUn | 27101763 | 27102031 | 269 SAT1_CF  | blue | na |
| chrUn | 27102059 | 27102409 | 351 SAT1_CF  | blue | na |
| chrUn | 27205678 | 27206202 | 525 SAT1_CF  | blue | na |
| chrUn | 27206252 | 27206750 | 499 SAT1_CF  | blue | na |
| chrUn | 27206763 | 27207159 | 397 SAT1_CF  | blue | na |
| chrUn | 27207205 | 27207726 | 522 SAT1_CF  | blue | na |
| chrUn | 27207793 | 27208752 | 960 SAT1_CF  | blue | na |
| chrUn | 27209053 | 27209364 | 312 SAT1_CF  | blue | na |
| chrUn | 27209386 | 27209456 | 71 SAT1_CF   | blue | na |
| chrUn | 27209469 | 27210153 | 685 SAT1_CF  | blue | na |
| chrUn | 27210166 | 27211017 | 852 SAT1_CF  | blue | na |
| chrUn | 27211039 | 27211924 | 886 SAT1_CF  | blue | na |
| chrUn | 27211936 | 27212619 | 684 SAT1_CF  | blue | na |
| chrUn | 27212630 | 27213294 | 665 SAT1_CF  | blue | na |
| chrUn | 27213321 | 27215166 | 1846 SAT1_CF | blue | na |
| chrUn | 27215209 | 27215754 | 546 SAT1_CF  | blue | na |
| chrUn | 27215770 | 27215883 | 114 SAT1_CF  | blue | na |
| chrUn | 27215895 | 27216415 | 521 SAT1_CF  | blue | na |
| chrUn | 27216449 | 27217885 | 1437 SAT1_CF | blue | na |
| chrUn | 27217930 | 27218603 | 674 SAT1_CF  | blue | na |
| chrUn | 27218630 | 27219218 | 589 SAT1_CF  | blue | na |
| chrUn | 27219245 | 27219848 | 604 SAT1_CF  | blue | na |
| chrUn | 27219860 | 27220953 | 1094 SAT1_CF | blue | na |
| chrUn | 27220995 | 27221670 | 676 SAT1_CF  | blue | na |
| chrUn | 27221682 | 27222829 | 1148 SAT1_CF | blue | na |
| chrUn | 27222907 | 27224300 | 1394 SAT1_CF | blue | na |
| chrUn | 27224321 | 27225244 | 924 SAT1_CF  | blue | na |
| chrUn | 27225287 | 27226104 | 818 SAT1_CF  | blue | na |
| chrUn | 27226146 | 27227065 | 920 SAT1_CF  | blue | na |
| chrUn | 27227078 | 27227577 | 500 SAT1_CF  | blue | na |
| chrUn | 27227666 | 27228626 | 961 SAT1_CF  | blue | na |
| chrUn | 27228693 | 27229658 | 966 SAT1_CF  | blue | na |

|       |          |          |              |      |    |
|-------|----------|----------|--------------|------|----|
| chrUn | 27229701 | 27230378 | 678 SAT1_CF  | blue | na |
| chrUn | 27230390 | 27230891 | 502 SAT1_CF  | blue | na |
| chrUn | 27230936 | 27231093 | 158 SAT1_CF  | blue | na |
| chrUn | 27231144 | 27231630 | 487 SAT1_CF  | blue | na |
| chrUn | 27231661 | 27232191 | 531 SAT1_CF  | blue | na |
| chrUn | 27232212 | 27232319 | 108 SAT1_CF  | blue | na |
| chrUn | 27232332 | 27232831 | 500 SAT1_CF  | blue | na |
| chrUn | 27232918 | 27235626 | 2709 SAT1_CF | blue | na |
| chrUn | 27235638 | 27236322 | 685 SAT1_CF  | blue | na |
| chrUn | 27236334 | 27237609 | 1276 SAT1_CF | blue | na |
| chrUn | 27237653 | 27237809 | 157 SAT1_CF  | blue | na |
| chrUn | 27237837 | 27239062 | 1226 SAT1_CF | blue | na |
| chrUn | 27239086 | 27240398 | 1313 SAT1_CF | blue | na |
| chrUn | 27240410 | 27240885 | 476 SAT1_CF  | blue | na |
| chrUn | 27240955 | 27241628 | 674 SAT1_CF  | blue | na |
| chrUn | 27241640 | 27242193 | 554 SAT1_CF  | blue | na |
| chrUn | 27242236 | 27243386 | 1151 SAT1_CF | blue | na |
| chrUn | 27243399 | 27244236 | 838 SAT1_CF  | blue | na |
| chrUn | 27244256 | 27244796 | 541 SAT1_CF  | blue | na |
| chrUn | 27244840 | 27245179 | 340 SAT1_CF  | blue | na |
| chrUn | 27245223 | 27246555 | 1333 SAT1_CF | blue | na |
| chrUn | 27246569 | 27247198 | 630 SAT1_CF  | blue | na |
| chrUn | 27247219 | 27247327 | 109 SAT1_CF  | blue | na |
| chrUn | 27247339 | 27248022 | 684 SAT1_CF  | blue | na |
| chrUn | 27248035 | 27248554 | 520 SAT1_CF  | blue | na |
| chrUn | 27248622 | 27249523 | 902 SAT1_CF  | blue | na |
| chrUn | 27249613 | 27250576 | 964 SAT1_CF  | blue | na |
| chrUn | 27250619 | 27251287 | 669 SAT1_CF  | blue | na |
| chrUn | 27251305 | 27251855 | 551 SAT1_CF  | blue | na |
| chrUn | 27251878 | 27251949 | 72 SAT1_CF   | blue | na |
| chrUn | 27251962 | 27252723 | 762 SAT1_CF  | blue | na |
| chrUn | 27252736 | 27253237 | 502 SAT1_CF  | blue | na |
| chrUn | 27253290 | 27254437 | 1148 SAT1_CF | blue | na |
| chrUn | 27254518 | 27255816 | 1299 SAT1_CF | blue | na |
| chrUn | 27255828 | 27256402 | 575 SAT1_CF  | blue | na |
| chrUn | 27256455 | 27256531 | 77 SAT1_CF   | blue | na |
| chrUn | 27256544 | 27257379 | 836 SAT1_CF  | blue | na |
| chrUn | 27257392 | 27258709 | 1318 SAT1_CF | blue | na |
| chrUn | 27258721 | 27259239 | 519 SAT1_CF  | blue | na |
| chrUn | 27259264 | 27259708 | 445 SAT1_CF  | blue | na |
| chrUn | 27259774 | 27260441 | 668 SAT1_CF  | blue | na |
| chrUn | 27260483 | 27260830 | 348 SAT1_CF  | blue | na |

|       |          |          |              |      |    |
|-------|----------|----------|--------------|------|----|
| chrUn | 27260868 | 27261412 | 545 SAT1_CF  | blue | na |
| chrUn | 27261462 | 27262001 | 540 SAT1_CF  | blue | na |
| chrUn | 27262044 | 27263501 | 1458 SAT1_CF | blue | na |
| chrUn | 27263514 | 27264016 | 503 SAT1_CF  | blue | na |
| chrUn | 27264056 | 27265015 | 960 SAT1_CF  | blue | na |
| chrUn | 27265094 | 27266056 | 963 SAT1_CF  | blue | na |
| chrUn | 27266099 | 27267326 | 1228 SAT1_CF | blue | na |
| chrUn | 27267340 | 27267832 | 493 SAT1_CF  | blue | na |
| chrUn | 27267843 | 27269579 | 1737 SAT1_CF | blue | na |
| chrUn | 27269592 | 27270226 | 635 SAT1_CF  | blue | na |
| chrUn | 27270248 | 27270750 | 503 SAT1_CF  | blue | na |
| chrUn | 27270803 | 27271812 | 1010 SAT1_CF | blue | na |
| chrUn | 27271867 | 27272831 | 965 SAT1_CF  | blue | na |
| chrUn | 27272874 | 27273538 | 665 SAT1_CF  | blue | na |
| chrUn | 27273561 | 27274244 | 684 SAT1_CF  | blue | na |
| chrUn | 27274264 | 27274758 | 495 SAT1_CF  | blue | na |
| chrUn | 27274798 | 27275371 | 574 SAT1_CF  | blue | na |
| chrUn | 27276770 | 27277365 | 596 SAT1_CF  | blue | na |
| chrUn | 27277414 | 27278059 | 646 SAT1_CF  | blue | na |
| chrUn | 27278101 | 27278412 | 312 SAT1_CF  | blue | na |
| chrUn | 27278454 | 27278974 | 521 SAT1_CF  | blue | na |
| chrUn | 27279008 | 27279373 | 366 SAT1_CF  | blue | na |
| chrUn | 27279405 | 27281489 | 2085 SAT1_CF | blue | na |
| chrUn | 27281567 | 27282958 | 1392 SAT1_CF | blue | na |
| chrUn | 27282987 | 27286080 | 3094 SAT1_CF | blue | na |
| chrUn | 27286127 | 27286912 | 786 SAT1_CF  | blue | na |
| chrUn | 27286937 | 27287770 | 834 SAT1_CF  | blue | na |
| chrUn | 27287791 | 27287899 | 109 SAT1_CF  | blue | na |
| chrUn | 27287912 | 27288413 | 502 SAT1_CF  | blue | na |
| chrUn | 27288453 | 27288854 | 402 SAT1_CF  | blue | na |
| chrUn | 27288868 | 27289386 | 519 SAT1_CF  | blue | na |
| chrUn | 27289407 | 27289595 | 189 SAT1_CF  | blue | na |
| chrUn | 27289729 | 27291043 | 1315 SAT1_CF | blue | na |
| chrUn | 27291064 | 27291172 | 109 SAT1_CF  | blue | na |
| chrUn | 27291185 | 27291665 | 481 SAT1_CF  | blue | na |
| chrUn | 27291721 | 27292093 | 373 SAT1_CF  | blue | na |
| chrUn | 27292136 | 27292684 | 549 SAT1_CF  | blue | na |
| chrUn | 27292765 | 27293924 | 1160 SAT1_CF | blue | na |
| chrUn | 27293936 | 27294568 | 633 SAT1_CF  | blue | na |
| chrUn | 27294639 | 27295179 | 541 SAT1_CF  | blue | na |
| chrUn | 27295198 | 27295510 | 313 SAT1_CF  | blue | na |
| chrUn | 27295590 | 27296154 | 565 SAT1_CF  | blue | na |



|       |          |          |              |        |    |
|-------|----------|----------|--------------|--------|----|
| chrUn | 27296181 | 27296809 | 629 SAT1_CF  | blue   | na |
| chrUn | 27296852 | 27297401 | 550 SAT1_CF  | blue   | na |
| chrUn | 27297445 | 27298686 | 1242 SAT1_CF | blue   | na |
| chrUn | 27298765 | 27300622 | 1858 SAT1_CF | blue   | na |
| chrUn | 27300643 | 27301603 | 961 SAT1_CF  | blue   | na |
| chrUn | 27301682 | 27303539 | 1858 SAT1_CF | blue   | na |
| chrUn | 27303560 | 27304678 | 1119 SAT1_CF | blue   | na |
| chrUn | 27306023 | 27306216 | 194 SAT1_CF  | blue   | na |
| chrUn | 27306243 | 27306855 | 613 SAT1_CF  | blue   | na |
| chrUn | 27306869 | 27307610 | 742 SAT1_CF  | blue   | na |
| chrUn | 27307638 | 27308138 | 501 SAT1_CF  | blue   | na |
| chrUn | 27310002 | 27311077 | 1076 SAT1_CF | blue   | na |
| chrUn | 27311104 | 27312337 | 1234 SAT1_CF | blue   | na |
| chrUn | 27312363 | 27313037 | 675 SAT1_CF  | blue   | na |
| chrUn | 27314624 | 27315347 | 724 CarSat1  | red    | na |
| chrUn | 27315340 | 27316609 | 1270 SAT1_CF | blue   | na |
| chrUn | 27316674 | 27317914 | 1241 CarSat1 | red    | na |
| chrUn | 27317935 | 27318725 | 791 CarSat1  | red    | na |
| chrUn | 27318749 | 27319531 | 783 CarSat1  | red    | na |
| chrUn | 27319552 | 27321087 | 1536 CarSat1 | red    | na |
| chrUn | 27321106 | 27321821 | 716 CarSat1  | red    | na |
| chrUn | 27321844 | 27322620 | 777 CarSat1  | red    | na |
| chrUn | 27322641 | 27323970 | 1330 CarSat1 | red    | na |
| chrUn | 27323995 | 27324172 | 178 CarSat1  | red    | na |
| chrUn | 27324331 | 27325037 | 707 CarSat1  | red    | na |
| chrUn | 27352146 | 27353396 | 1251 Sat2CF  | purple | na |
| chrUn | 27352277 | 27353394 | 1118 Sat2CF  | purple | na |
| chrUn | 27370605 | 27371730 | 1126 Sat2CF  | purple | na |
| chrUn | 27386521 | 27386898 | 378 Sat2CF   | purple | na |
| chrUn | 27386576 | 27387470 | 895 Sat2CF   | purple | na |
| chrUn | 27386652 | 27387390 | 739 Sat2CF   | purple | na |
| chrUn | 27401285 | 27402027 | 743 Sat2CF   | purple | na |
| chrUn | 27401361 | 27402027 | 667 Sat2CF   | purple | na |
| chrUn | 27441624 | 27442843 | 1220 Sat2CF  | purple | na |
| chrUn | 27441752 | 27442838 | 1087 Sat2CF  | purple | na |
| chrUn | 27442716 | 27442863 | 148 Sat2CF   | purple | na |
| chrUn | 27469486 | 27470368 | 883 Sat2CF   | purple | na |
| chrUn | 27469701 | 27470450 | 750 Sat2CF   | purple | na |
| chrUn | 27498520 | 27498912 | 393 Sat2CF   | purple | na |
| chrUn | 27498594 | 27499304 | 711 Sat2CF   | purple | na |
| chrUn | 27515977 | 27516736 | 760 SAT1_CF  | blue   | na |
| chrUn | 27516749 | 27517354 | 606 SAT1_CF  | blue   | na |

|       |          |          |      |         |      |    |
|-------|----------|----------|------|---------|------|----|
| chrUn | 27517366 | 27520758 | 3393 | SAT1_CF | blue | na |
| chrUn | 27520770 | 27521453 | 684  | SAT1_CF | blue | na |
| chrUn | 27521476 | 27522030 | 555  | SAT1_CF | blue | na |
| chrUn | 27522042 | 27522950 | 909  | SAT1_CF | blue | na |
| chrUn | 27522971 | 27524539 | 1569 | SAT1_CF | blue | na |
| chrUn | 27524584 | 27525084 | 501  | SAT1_CF | blue | na |
| chrUn | 27525097 | 27525702 | 606  | SAT1_CF | blue | na |
| chrUn | 27525714 | 27526388 | 675  | SAT1_CF | blue | na |
| chrUn | 27526431 | 27528085 | 1655 | SAT1_CF | blue | na |
| chrUn | 27528099 | 27528501 | 403  | SAT1_CF | blue | na |
| chrUn | 27528541 | 27529041 | 501  | SAT1_CF | blue | na |
| chrUn | 27529054 | 27531115 | 2062 | SAT1_CF | blue | na |
| chrUn | 27531127 | 27531236 | 110  | SAT1_CF | blue | na |
| chrUn | 27531256 | 27531801 | 546  | SAT1_CF | blue | na |
| chrUn | 27531813 | 27532458 | 646  | SAT1_CF | blue | na |
| chrUn | 27532502 | 27532990 | 489  | SAT1_CF | blue | na |
| chrUn | 27533003 | 27534200 | 1198 | SAT1_CF | blue | na |
| chrUn | 27534212 | 27534884 | 673  | SAT1_CF | blue | na |
| chrUn | 27534911 | 27535630 | 720  | SAT1_CF | blue | na |
| chrUn | 27535642 | 27536188 | 547  | SAT1_CF | blue | na |
| chrUn | 27536258 | 27537198 | 941  | SAT1_CF | blue | na |
| chrUn | 27537210 | 27538138 | 929  | SAT1_CF | blue | na |
| chrUn | 27538181 | 27538870 | 690  | SAT1_CF | blue | na |
| chrUn | 27538904 | 27540122 | 1219 | SAT1_CF | blue | na |
| chrUn | 27540134 | 27540809 | 676  | SAT1_CF | blue | na |
| chrUn | 27540852 | 27543214 | 2363 | SAT1_CF | blue | na |
| chrUn | 27543226 | 27543334 | 109  | SAT1_CF | blue | na |
| chrUn | 27543357 | 27543912 | 556  | SAT1_CF | blue | na |
| chrUn | 27543924 | 27544033 | 110  | SAT1_CF | blue | na |
| chrUn | 27544053 | 27544598 | 546  | SAT1_CF | blue | na |
| chrUn | 27544641 | 27545272 | 632  | SAT1_CF | blue | na |
| chrUn | 27545320 | 27546566 | 1247 | SAT1_CF | blue | na |
| chrUn | 27546606 | 27547401 | 796  | SAT1_CF | blue | na |
| chrUn | 27547413 | 27548271 | 859  | SAT1_CF | blue | na |
| chrUn | 27548313 | 27549343 | 1031 | SAT1_CF | blue | na |
| chrUn | 27549424 | 27549947 | 524  | SAT1_CF | blue | na |
| chrUn | 27549978 | 27550157 | 180  | SAT1_CF | blue | na |
| chrUn | 27550201 | 27550695 | 495  | SAT1_CF | blue | na |
| chrUn | 27550713 | 27551381 | 669  | SAT1_CF | blue | na |
| chrUn | 27551402 | 27551862 | 461  | SAT1_CF | blue | na |
| chrUn | 27551904 | 27552444 | 541  | SAT1_CF | blue | na |
| chrUn | 27552465 | 27553476 | 1012 | SAT1_CF | blue | na |

|       |          |          |              |      |    |
|-------|----------|----------|--------------|------|----|
| chrUn | 27553488 | 27554164 | 677 SAT1_CF  | blue | na |
| chrUn | 27554180 | 27554975 | 796 SAT1_CF  | blue | na |
| chrUn | 27554987 | 27555845 | 859 SAT1_CF  | blue | na |
| chrUn | 27555915 | 27557559 | 1645 SAT1_CF | blue | na |
| chrUn | 27557574 | 27557769 | 196 SAT1_CF  | blue | na |
| chrUn | 27557813 | 27558307 | 495 SAT1_CF  | blue | na |
| chrUn | 27558325 | 27558994 | 670 SAT1_CF  | blue | na |
| chrUn | 27559015 | 27559475 | 461 SAT1_CF  | blue | na |
| chrUn | 27559517 | 27560057 | 541 SAT1_CF  | blue | na |
| chrUn | 27560078 | 27561089 | 1012 SAT1_CF | blue | na |
| chrUn | 27561101 | 27561777 | 677 SAT1_CF  | blue | na |
| chrUn | 27561793 | 27562588 | 796 SAT1_CF  | blue | na |
| chrUn | 27562601 | 27563214 | 614 SAT1_CF  | blue | na |
| chrUn | 27563226 | 27564084 | 859 SAT1_CF  | blue | na |
| chrUn | 27564161 | 27564927 | 767 SAT1_CF  | blue | na |
| chrUn | 27564952 | 27565494 | 543 SAT1_CF  | blue | na |
| chrUn | 27565516 | 27566188 | 673 SAT1_CF  | blue | na |
| chrUn | 27566200 | 27566875 | 676 SAT1_CF  | blue | na |
| chrUn | 27566918 | 27567883 | 966 SAT1_CF  | blue | na |
| chrUn | 27567962 | 27568915 | 954 SAT1_CF  | blue | na |
| chrUn | 27568955 | 27569456 | 502 SAT1_CF  | blue | na |
| chrUn | 27569483 | 27570231 | 749 SAT1_CF  | blue | na |
| chrUn | 27570243 | 27571447 | 1205 SAT1_CF | blue | na |
| chrUn | 27571489 | 27572277 | 789 SAT1_CF  | blue | na |
| chrUn | 27572321 | 27573030 | 710 SAT1_CF  | blue | na |
| chrUn | 27573060 | 27573843 | 784 SAT1_CF  | blue | na |
| chrUn | 27573885 | 27574585 | 701 SAT1_CF  | blue | na |
| chrUn | 27574599 | 27576175 | 1577 SAT1_CF | blue | na |
| chrUn | 27576188 | 27576264 | 77 SAT1_CF   | blue | na |
| chrUn | 27576317 | 27576812 | 496 SAT1_CF  | blue | na |
| chrUn | 27576824 | 27577673 | 850 SAT1_CF  | blue | na |
| chrUn | 27577686 | 27577728 | 43 SAT1_CF   | blue | na |
| chrUn | 27577758 | 27578302 | 545 SAT1_CF  | blue | na |
| chrUn | 27578383 | 27578692 | 310 SAT1_CF  | blue | na |
| chrUn | 27578725 | 27581040 | 2316 SAT1_CF | blue | na |
| chrUn | 27581053 | 27581812 | 760 SAT1_CF  | blue | na |
| chrUn | 27581824 | 27582505 | 682 SAT1_CF  | blue | na |
| chrUn | 27582517 | 27583191 | 675 SAT1_CF  | blue | na |
| chrUn | 27583238 | 27584193 | 956 SAT1_CF  | blue | na |
| chrUn | 27584237 | 27584780 | 544 SAT1_CF  | blue | na |
| chrUn | 27584827 | 27584936 | 110 SAT1_CF  | blue | na |
| chrUn | 27585125 | 27585406 | 282 SAT1_CF  | blue | na |

|       |          |          |              |      |    |
|-------|----------|----------|--------------|------|----|
| chrUn | 27585465 | 27585945 | 481 SAT1_CF  | blue | na |
| chrUn | 27585958 | 27587092 | 1135 SAT1_CF | blue | na |
| chrUn | 27587125 | 27588008 | 884 SAT1_CF  | blue | na |
| chrUn | 27588097 | 27588590 | 494 SAT1_CF  | blue | na |
| chrUn | 27588610 | 27589293 | 684 SAT1_CF  | blue | na |
| chrUn | 27589305 | 27589982 | 678 SAT1_CF  | blue | na |
| chrUn | 27590051 | 27590596 | 546 SAT1_CF  | blue | na |
| chrUn | 27590639 | 27591179 | 541 SAT1_CF  | blue | na |
| chrUn | 27591194 | 27592266 | 1073 SAT1_CF | blue | na |
| chrUn | 27592308 | 27592510 | 203 SAT1_CF  | blue | na |
| chrUn | 27592690 | 27592878 | 189 SAT1_CF  | blue | na |
| chrUn | 27592934 | 27593414 | 481 SAT1_CF  | blue | na |
| chrUn | 27593427 | 27593532 | 106 SAT1_CF  | blue | na |
| chrUn | 27593555 | 27594907 | 1353 SAT1_CF | blue | na |
| chrUn | 27594922 | 27595079 | 158 SAT1_CF  | blue | na |
| chrUn | 27595105 | 27596316 | 1212 SAT1_CF | blue | na |
| chrUn | 27596340 | 27596913 | 574 SAT1_CF  | blue | na |
| chrUn | 27596954 | 27597455 | 502 SAT1_CF  | blue | na |
| chrUn | 27597469 | 27598152 | 684 SAT1_CF  | blue | na |
| chrUn | 27598164 | 27598999 | 836 SAT1_CF  | blue | na |
| chrUn | 27599180 | 27599365 | 186 SAT1_CF  | blue | na |
| chrUn | 27599401 | 27599903 | 503 SAT1_CF  | blue | na |
| chrUn | 27599925 | 27600599 | 675 SAT1_CF  | blue | na |
| chrUn | 27600611 | 27601288 | 678 SAT1_CF  | blue | na |
| chrUn | 27601331 | 27601874 | 544 SAT1_CF  | blue | na |
| chrUn | 27601917 | 27602465 | 549 SAT1_CF  | blue | na |
| chrUn | 27602477 | 27605397 | 2921 SAT1_CF | blue | na |
| chrUn | 27605442 | 27606439 | 998 SAT1_CF  | blue | na |
| chrUn | 27606484 | 27607392 | 909 SAT1_CF  | blue | na |
| chrUn | 27607426 | 27607946 | 521 SAT1_CF  | blue | na |
| chrUn | 27608028 | 27608351 | 324 SAT1_CF  | blue | na |
| chrUn | 27608393 | 27609683 | 1291 SAT1_CF | blue | na |
| chrUn | 27609773 | 27610272 | 500 SAT1_CF  | blue | na |
| chrUn | 27610286 | 27611010 | 725 SAT1_CF  | blue | na |
| chrUn | 27611022 | 27611702 | 681 SAT1_CF  | blue | na |
| chrUn | 27611714 | 27613009 | 1296 SAT1_CF | blue | na |
| chrUn | 27613021 | 27614245 | 1225 SAT1_CF | blue | na |
| chrUn | 27614258 | 27614886 | 629 SAT1_CF  | blue | na |
| chrUn | 27614897 | 27615365 | 469 SAT1_CF  | blue | na |
| chrUn | 27615385 | 27616836 | 1452 SAT1_CF | blue | na |
| chrUn | 27616905 | 27617635 | 731 SAT1_CF  | blue | na |
| chrUn | 27617677 | 27618563 | 887 SAT1_CF  | blue | na |

|       |          |          |      |         |      |    |
|-------|----------|----------|------|---------|------|----|
| chrUn | 27618606 | 27619114 | 509  | SAT1_CF | blue | na |
| chrUn | 27619147 | 27619527 | 381  | SAT1_CF | blue | na |
| chrUn | 27619565 | 27620064 | 500  | SAT1_CF | blue | na |
| chrUn | 27620082 | 27620185 | 104  | SAT1_CF | blue | na |
| chrUn | 27620206 | 27620780 | 575  | SAT1_CF | blue | na |
| chrUn | 27620792 | 27622040 | 1249 | SAT1_CF | blue | na |
| chrUn | 27622062 | 27622728 | 667  | SAT1_CF | blue | na |
| chrUn | 27622772 | 27623333 | 562  | SAT1_CF | blue | na |
| chrUn | 27623376 | 27623900 | 525  | SAT1_CF | blue | na |
| chrUn | 27623915 | 27624051 | 137  | SAT1_CF | blue | na |
| chrUn | 27624117 | 27624619 | 503  | SAT1_CF | blue | na |
| chrUn | 27624632 | 27624739 | 108  | SAT1_CF | blue | na |
| chrUn | 27624761 | 27625314 | 554  | SAT1_CF | blue | na |
| chrUn | 27625326 | 27626088 | 763  | SAT1_CF | blue | na |
| chrUn | 27626100 | 27627432 | 1333 | SAT1_CF | blue | na |
| chrUn | 27627476 | 27628807 | 1332 | SAT1_CF | blue | na |
| chrUn | 27628894 | 27629396 | 503  | SAT1_CF | blue | na |
| chrUn | 27629408 | 27629514 | 107  | SAT1_CF | blue | na |
| chrUn | 27629538 | 27630166 | 629  | SAT1_CF | blue | na |
| chrUn | 27630190 | 27630637 | 448  | SAT1_CF | blue | na |
| chrUn | 27630654 | 27631363 | 710  | SAT1_CF | blue | na |
| chrUn | 27631378 | 27631514 | 137  | SAT1_CF | blue | na |
| chrUn | 27631610 | 27632129 | 520  | SAT1_CF | blue | na |
| chrUn | 27632186 | 27632731 | 546  | SAT1_CF | blue | na |
| chrUn | 27632774 | 27634594 | 1821 | SAT1_CF | blue | na |
| chrUn | 27634636 | 27635134 | 499  | SAT1_CF | blue | na |
| chrUn | 27635151 | 27635830 | 680  | SAT1_CF | blue | na |
| chrUn | 27635843 | 27635923 | 81   | SAT1_CF | blue | na |
| chrUn | 27635938 | 27636457 | 520  | SAT1_CF | blue | na |
| chrUn | 27636469 | 27638152 | 1684 | SAT1_CF | blue | na |
| chrUn | 27638196 | 27638738 | 543  | SAT1_CF | blue | na |
| chrUn | 27638760 | 27639434 | 675  | SAT1_CF | blue | na |
| chrUn | 27639446 | 27640352 | 907  | SAT1_CF | blue | na |
| chrUn | 27640383 | 27641289 | 907  | SAT1_CF | blue | na |
| chrUn | 27641307 | 27641829 | 523  | SAT1_CF | blue | na |
| chrUn | 27641857 | 27642238 | 382  | SAT1_CF | blue | na |
| chrUn | 27642259 | 27642749 | 491  | SAT1_CF | blue | na |
| chrUn | 27642761 | 27642870 | 110  | SAT1_CF | blue | na |
| chrUn | 27642891 | 27643428 | 538  | SAT1_CF | blue | na |
| chrUn | 27643485 | 27644028 | 544  | SAT1_CF | blue | na |
| chrUn | 27644071 | 27645141 | 1071 | SAT1_CF | blue | na |
| chrUn | 27645175 | 27646109 | 935  | SAT1_CF | blue | na |

|       |          |          |              |      |    |
|-------|----------|----------|--------------|------|----|
| chrUn | 27646147 | 27646649 | 503 SAT1_CF  | blue | na |
| chrUn | 27646662 | 27647326 | 665 SAT1_CF  | blue | na |
| chrUn | 27647383 | 27647926 | 544 SAT1_CF  | blue | na |
| chrUn | 27647969 | 27648506 | 538 SAT1_CF  | blue | na |
| chrUn | 27648539 | 27649207 | 669 SAT1_CF  | blue | na |
| chrUn | 27649220 | 27650782 | 1563 SAT1_CF | blue | na |
| chrUn | 27650800 | 27651562 | 763 SAT1_CF  | blue | na |
| chrUn | 27651574 | 27652248 | 675 SAT1_CF  | blue | na |
| chrUn | 27652291 | 27654486 | 2196 SAT1_CF | blue | na |
| chrUn | 27654498 | 27655324 | 827 SAT1_CF  | blue | na |
| chrUn | 27655337 | 27656012 | 676 SAT1_CF  | blue | na |
| chrUn | 27656056 | 27656566 | 511 SAT1_CF  | blue | na |
| chrUn | 27656636 | 27657191 | 556 SAT1_CF  | blue | na |
| chrUn | 27657203 | 27658508 | 1306 SAT1_CF | blue | na |
| chrUn | 27658551 | 27659508 | 958 SAT1_CF  | blue | na |
| chrUn | 27659587 | 27660547 | 961 SAT1_CF  | blue | na |
| chrUn | 27660587 | 27661088 | 502 SAT1_CF  | blue | na |
| chrUn | 27661100 | 27661784 | 685 SAT1_CF  | blue | na |
| chrUn | 27661796 | 27662472 | 677 SAT1_CF  | blue | na |
| chrUn | 27662515 | 27663883 | 1369 SAT1_CF | blue | na |
| chrUn | 27663895 | 27664801 | 907 SAT1_CF  | blue | na |
| chrUn | 27664826 | 27665339 | 514 SAT1_CF  | blue | na |
| chrUn | 27665472 | 27666664 | 1193 SAT1_CF | blue | na |
| chrUn | 27666676 | 27667254 | 579 SAT1_CF  | blue | na |
| chrUn | 27667292 | 27668155 | 864 SAT1_CF  | blue | na |
| chrUn | 27668198 | 27668571 | 374 SAT1_CF  | blue | na |
| chrUn | 27668607 | 27669107 | 501 SAT1_CF  | blue | na |
| chrUn | 27669121 | 27669803 | 683 SAT1_CF  | blue | na |
| chrUn | 27669817 | 27670495 | 679 SAT1_CF  | blue | na |
| chrUn | 27670575 | 27671203 | 629 SAT1_CF  | blue | na |
| chrUn | 27671215 | 27671892 | 678 SAT1_CF  | blue | na |
| chrUn | 27671937 | 27672459 | 523 SAT1_CF  | blue | na |
| chrUn | 27672498 | 27672643 | 146 SAT1_CF  | blue | na |
| chrUn | 27672703 | 27673664 | 962 SAT1_CF  | blue | na |
| chrUn | 27673685 | 27674330 | 646 SAT1_CF  | blue | na |
| chrUn | 27694255 | 27695167 | 913 SAT1_CF  | blue | na |
| chrUn | 27695233 | 27695714 | 482 SAT1_CF  | blue | na |
| chrUn | 27695726 | 27696586 | 861 SAT1_CF  | blue | na |
| chrUn | 27696628 | 27698427 | 1800 SAT1_CF | blue | na |
| chrUn | 27698503 | 27699680 | 1178 SAT1_CF | blue | na |
| chrUn | 27699724 | 27700266 | 543 SAT1_CF  | blue | na |
| chrUn | 27700293 | 27700678 | 386 SAT1_CF  | blue | na |

|       |          |          |              |        |    |
|-------|----------|----------|--------------|--------|----|
| chrUn | 27700692 | 27701252 | 561 SAT1_CF  | blue   | na |
| chrUn | 27702659 | 27703225 | 567 SAT1_CF  | blue   | na |
| chrUn | 27703254 | 27704299 | 1046 SAT1_CF | blue   | na |
| chrUn | 27704351 | 27704508 | 158 SAT1_CF  | blue   | na |
| chrUn | 27704553 | 27705055 | 503 SAT1_CF  | blue   | na |
| chrUn | 27705068 | 27706483 | 1416 SAT1_CF | blue   | na |
| chrUn | 27706499 | 27708257 | 1759 SAT1_CF | blue   | na |
| chrUn | 27708269 | 27709122 | 854 SAT1_CF  | blue   | na |
| chrUn | 27709135 | 27711578 | 2444 SAT1_CF | blue   | na |
| chrUn | 27711589 | 27711912 | 324 SAT1_CF  | blue   | na |
| chrUn | 27711961 | 27712463 | 503 SAT1_CF  | blue   | na |
| chrUn | 27712475 | 27713109 | 635 SAT1_CF  | blue   | na |
| chrUn | 27713135 | 27714101 | 967 SAT1_CF  | blue   | na |
| chrUn | 27714114 | 27714271 | 158 SAT1_CF  | blue   | na |
| chrUn | 27714318 | 27714839 | 522 SAT1_CF  | blue   | na |
| chrUn | 27714852 | 27715457 | 606 SAT1_CF  | blue   | na |
| chrUn | 27715469 | 27716641 | 1173 SAT1_CF | blue   | na |
| chrUn | 27716693 | 27717385 | 693 SAT1_CF  | blue   | na |
| chrUn | 27731554 | 27732382 | 829 Sat2CF   | purple | na |
| chrUn | 27732064 | 27732421 | 358 Sat2CF   | purple | na |
| chrUn | 27776167 | 27776974 | 808 Sat2CF   | purple | na |
| chrUn | 27776252 | 27777116 | 865 Sat2CF   | purple | na |
| chrUn | 27801898 | 27802077 | 180 Sat2CF   | purple | na |
| chrUn | 27801917 | 27803169 | 1253 Sat2CF  | purple | na |
| chrUn | 27801953 | 27803039 | 1087 Sat2CF  | purple | na |
| chrUn | 27880596 | 27881503 | 908 CarSat1  | red    | na |
| chrUn | 27881534 | 27882783 | 1250 CarSat1 | red    | na |
| chrUn | 27914453 | 27915409 | 957 CarSat1  | red    | na |
| chrUn | 27915569 | 27917019 | 1451 CarSat1 | red    | na |
| chrUn | 27917040 | 27918636 | 1597 CarSat1 | red    | na |
| chrUn | 27918657 | 27920254 | 1598 CarSat1 | red    | na |
| chrUn | 27920285 | 27921864 | 1580 CarSat1 | red    | na |
| chrUn | 27923192 | 27924507 | 1316 CarSat1 | red    | na |
| chrUn | 27924538 | 27926126 | 1589 CarSat1 | red    | na |
| chrUn | 27926157 | 27927745 | 1589 CarSat1 | red    | na |
| chrUn | 27927776 | 27929364 | 1589 CarSat1 | red    | na |
| chrUn | 27929395 | 27931394 | 2000 CarSat1 | red    | na |
| chrUn | 27931410 | 27932291 | 882 CarSat1  | red    | na |
| chrUn | 27932488 | 27933201 | 714 CarSat1  | red    | na |
| chrUn | 27941781 | 27942368 | 588 CarSat1  | red    | na |
| chrUn | 27942567 | 27943665 | 1099 CarSat1 | red    | na |
| chrUn | 27943699 | 27944106 | 408 CarSat1  | red    | na |

|       |          |          |      |         |        |    |
|-------|----------|----------|------|---------|--------|----|
| chrUn | 27949893 | 27950055 | 163  | Sat2CF  | purple | na |
| chrUn | 27949921 | 27950974 | 1054 | Sat2CF  | purple | na |
| chrUn | 27950851 | 27950995 | 145  | Sat2CF  | purple | na |
| chrUn | 27951204 | 27952133 | 930  | SAT1_CF | blue   | na |
| chrUn | 27952163 | 27952565 | 403  | SAT1_CF | blue   | na |
| chrUn | 27952597 | 27952999 | 403  | CarSat1 | red    | na |
| chrUn | 27953018 | 27954797 | 1780 | CarSat1 | red    | na |
| chrUn | 27954831 | 27955238 | 408  | CarSat1 | red    | na |
| chrUn | 27964304 | 27964871 | 568  | CarSat1 | red    | na |
| chrUn | 27965060 | 27965181 | 122  | CarSat1 | red    | na |
| chrUn | 27965199 | 27965994 | 796  | CarSat1 | red    | na |
| chrUn | 27966021 | 27966463 | 443  | CarSat1 | red    | na |
| chrUn | 27966636 | 27966745 | 110  | CarSat1 | red    | na |
| chrUn | 27966757 | 27967747 | 991  | CarSat1 | red    | na |
| chrUn | 27987937 | 27988105 | 169  | Sat2CF  | purple | na |
| chrUn | 27987987 | 27988781 | 795  | Sat2CF  | purple | na |
| chrUn | 28011929 | 28012397 | 469  | CarSat1 | red    | na |
| chrUn | 28012413 | 28013870 | 1458 | CarSat1 | red    | na |
| chrUn | 28013886 | 28014029 | 144  | CarSat1 | red    | na |
| chrUn | 28014229 | 28014942 | 714  | CarSat1 | red    | na |
| chrUn | 28023535 | 28024174 | 640  | CarSat1 | red    | na |
| chrUn | 28029979 | 28030356 | 378  | Sat2CF  | purple | na |
| chrUn | 28030040 | 28031039 | 1000 | Sat2CF  | purple | na |
| chrUn | 28030931 | 28031091 | 161  | Sat2CF  | purple | na |
| chrUn | 28031285 | 28032679 | 1395 | SAT1_CF | blue   | na |
| chrUn | 28032690 | 28033092 | 403  | CarSat1 | red    | na |
| chrUn | 28033111 | 28035369 | 2259 | CarSat1 | red    | na |
| chrUn | 28035390 | 28036107 | 718  | CarSat1 | red    | na |
| chrUn | 28036133 | 28036843 | 711  | CarSat1 | red    | na |
| chrUn | 28036864 | 28037838 | 975  | CarSat1 | red    | na |
| chrUn | 28037868 | 28038963 | 1096 | CarSat1 | red    | na |
| chrUn | 28039158 | 28039257 | 100  | CarSat1 | red    | na |
| chrUn | 28039275 | 28039870 | 596  | CarSat1 | red    | na |
| chrUn | 28048273 | 28049753 | 1481 | CarSat1 | red    | na |
| chrUn | 28049786 | 28051316 | 1531 | CarSat1 | red    | na |
| chrUn | 28053983 | 28055234 | 1252 | Sat2CF  | purple | na |
| chrUn | 28054019 | 28055104 | 1086 | Sat2CF  | purple | na |
| chrUn | 28067516 | 28068302 | 787  | Sat2CF  | purple | na |
| chrUn | 28067981 | 28068361 | 381  | Sat2CF  | purple | na |
| chrUn | 28083258 | 28083435 | 178  | Sat2CF  | purple | na |
| chrUn | 28083277 | 28083866 | 590  | Sat2CF  | purple | na |
| chrUn | 28083306 | 28083821 | 516  | Sat2CF  | purple | na |



|       |          |          |      |         |        |    |
|-------|----------|----------|------|---------|--------|----|
| chrUn | 28092702 | 28092888 | 187  | Sat2CF  | purple | na |
| chrUn | 28092764 | 28093847 | 1084 | Sat2CF  | purple | na |
| chrUn | 28092849 | 28093981 | 1133 | Sat2CF  | purple | na |
| chrUn | 28112070 | 28112753 | 684  | Sat2CF  | purple | na |
| chrUn | 28112142 | 28112829 | 688  | Sat2CF  | purple | na |
| chrUn | 28156332 | 28157438 | 1107 | Sat2CF  | purple | na |
| chrUn | 28169429 | 28170300 | 872  | Sat2CF  | purple | na |
| chrUn | 28169504 | 28170224 | 721  | Sat2CF  | purple | na |
| chrUn | 28184977 | 28185154 | 178  | Sat2CF  | purple | na |
| chrUn | 28185046 | 28186215 | 1170 | Sat2CF  | purple | na |
| chrUn | 28186614 | 28187059 | 446  | CarSat1 | red    | na |
| chrUn | 28187152 | 28188743 | 1592 | CarSat1 | red    | na |
| chrUn | 28188764 | 28190277 | 1514 | CarSat1 | red    | na |
| chrUn | 28190293 | 28191478 | 1186 | CarSat1 | red    | na |
| chrUn | 28191483 | 28193567 | 2085 | SAT1_CF | blue   | na |
| chrUn | 28193621 | 28194154 | 534  | SAT1_CF | blue   | na |
| chrUn | 28194171 | 28195519 | 1349 | SAT1_CF | blue   | na |
| chrUn | 28195541 | 28196321 | 781  | SAT1_CF | blue   | na |
| chrUn | 28196351 | 28196897 | 547  | SAT1_CF | blue   | na |
| chrUn | 28196935 | 28198181 | 1247 | SAT1_CF | blue   | na |
| chrUn | 28198216 | 28198717 | 502  | SAT1_CF | blue   | na |
| chrUn | 28198731 | 28199931 | 1201 | SAT1_CF | blue   | na |
| chrUn | 28199973 | 28201744 | 1772 | SAT1_CF | blue   | na |
| chrUn | 28201757 | 28202884 | 1128 | SAT1_CF | blue   | na |
| chrUn | 28202880 | 28203604 | 725  | CarSat1 | red    | na |
| chrUn | 28203755 | 28204053 | 299  | CarSat1 | red    | na |
| chrUn | 28205483 | 28206690 | 1208 | CarSat1 | red    | na |
| chrUn | 28206717 | 28207422 | 706  | CarSat1 | red    | na |
| chrUn | 28207449 | 28209383 | 1935 | CarSat1 | red    | na |
| chrUn | 28209408 | 28211219 | 1812 | CarSat1 | red    | na |
| chrUn | 28211235 | 28212423 | 1189 | CarSat1 | red    | na |
| chrUn | 28212453 | 28213466 | 1014 | CarSat1 | red    | na |
| chrUn | 28213491 | 28214213 | 723  | CarSat1 | red    | na |
| chrUn | 28214230 | 28215850 | 1621 | CarSat1 | red    | na |
| chrUn | 28216049 | 28216762 | 714  | CarSat1 | red    | na |
| chrUn | 28221951 | 28222328 | 378  | Sat2CF  | purple | na |
| chrUn | 28222012 | 28222813 | 802  | Sat2CF  | purple | na |
| chrUn | 28223018 | 28223174 | 157  | Sat2CF  | purple | na |
| chrUn | 28223048 | 28223208 | 161  | Sat2CF  | purple | na |
| chrUn | 28223402 | 28224789 | 1388 | SAT1_CF | blue   | na |
| chrUn | 28224807 | 28225208 | 402  | CarSat1 | red    | na |
| chrUn | 28225227 | 28227098 | 1872 | CarSat1 | red    | na |

|       |          |          |              |        |    |
|-------|----------|----------|--------------|--------|----|
| chrUn | 28255598 | 28255765 | 168 Sat2CF   | purple | na |
| chrUn | 28255619 | 28256451 | 833 Sat2CF   | purple | na |
| chrUn | 28255657 | 28256377 | 721 Sat2CF   | purple | na |
| chrUn | 28271381 | 28271931 | 551 Sat2CF   | purple | na |
| chrUn | 28280752 | 28280953 | 202 Sat2CF   | purple | na |
| chrUn | 28280793 | 28281969 | 1177 Sat2CF  | purple | na |
| chrUn | 28280824 | 28281842 | 1019 Sat2CF  | purple | na |
| chrUn | 28306003 | 28307252 | 1250 Sat2CF  | purple | na |
| chrUn | 28339320 | 28340057 | 738 Sat2CF   | purple | na |
| chrUn | 28339322 | 28339983 | 662 Sat2CF   | purple | na |
| chrUn | 28362536 | 28363348 | 813 Sat2CF   | purple | na |
| chrUn | 28362549 | 28363274 | 726 Sat2CF   | purple | na |
| chrUn | 28381548 | 28382664 | 1117 Sat2CF  | purple | na |
| chrUn | 28401148 | 28402046 | 899 Sat2CF   | purple | na |
| chrUn | 28401193 | 28401983 | 791 Sat2CF   | purple | na |
| chrUn | 28433530 | 28434427 | 898 Sat2CF   | purple | na |
| chrUn | 28433575 | 28434364 | 790 Sat2CF   | purple | na |
| chrUn | 28461373 | 28462568 | 1196 Sat2CF  | purple | na |
| chrUn | 28461404 | 28462422 | 1019 Sat2CF  | purple | na |
| chrUn | 28490946 | 28492049 | 1104 Sat2CF  | purple | na |
| chrUn | 28504434 | 28505291 | 858 Sat2CF   | purple | na |
| chrUn | 28519995 | 28520134 | 140 Sat2CF   | purple | na |
| chrUn | 28520026 | 28521216 | 1191 Sat2CF  | purple | na |
| chrUn | 28591653 | 28592364 | 712 Sat2CF   | purple | na |
| chrUn | 28592229 | 28592387 | 159 Sat2CF   | purple | na |
| chrUn | 28606947 | 28608531 | 1585 CarSat1 | red    | na |
| chrUn | 28608557 | 28610521 | 1965 CarSat1 | red    | na |
| chrUn | 28610523 | 28613730 | 3208 SAT1_CF | blue   | na |
| chrUn | 28613770 | 28614415 | 646 SAT1_CF  | blue   | na |
| chrUn | 28622653 | 28623444 | 792 Sat2CF   | purple | na |
| chrUn | 28623194 | 28623507 | 314 Sat2CF   | purple | na |
| chrUn | 28641419 | 28642535 | 1117 Sat2CF  | purple | na |
| chrUn | 28654762 | 28655877 | 1116 Sat2CF  | purple | na |
| chrUn | 28659694 | 28662369 | 2676 CarSat1 | red    | na |
| chrUn | 28662391 | 28665584 | 3194 CarSat1 | red    | na |
| chrUn | 28665604 | 28667197 | 1594 CarSat1 | red    | na |
| chrUn | 28667216 | 28668217 | 1002 CarSat1 | red    | na |
| chrUn | 28668274 | 28668883 | 610 CarSat1  | red    | na |
| chrUn | 28668904 | 28669637 | 734 CarSat1  | red    | na |
| chrUn | 28678616 | 28679092 | 477 CarSat1  | red    | na |
| chrUn | 28679108 | 28679639 | 532 CarSat1  | red    | na |
| chrUn | 28700829 | 28702007 | 1179 Sat2CF  | purple | na |

|       |          |          |              |        |    |
|-------|----------|----------|--------------|--------|----|
| chrUn | 28723069 | 28724178 | 1110 Sat2CF  | purple | na |
| chrUn | 28742281 | 28742575 | 295 Sat2CF   | purple | na |
| chrUn | 28742327 | 28743026 | 700 Sat2CF   | purple | na |
| chrUn | 28742892 | 28743054 | 163 Sat2CF   | purple | na |
| chrUn | 28763069 | 28764225 | 1157 Sat2CF  | purple | na |
| chrUn | 28763091 | 28764088 | 998 Sat2CF   | purple | na |
| chrUn | 28786175 | 28786940 | 766 Sat2CF   | purple | na |
| chrUn | 28801843 | 28802424 | 582 CarSat1  | red    | na |
| chrUn | 28802446 | 28804030 | 1585 CarSat1 | red    | na |
| chrUn | 28804051 | 28806025 | 1975 CarSat1 | red    | na |
| chrUn | 28806027 | 28806496 | 470 SAT1_CF  | blue   | na |
| chrUn | 28806511 | 28809308 | 2798 SAT1_CF | blue   | na |
| chrUn | 28809348 | 28810403 | 1056 SAT1_CF | blue   | na |
| chrUn | 28810398 | 28811117 | 720 CarSat1  | red    | na |
| chrUn | 28811269 | 28811564 | 296 CarSat1  | red    | na |
| chrUn | 28813245 | 28814460 | 1216 SAT1_CF | blue   | na |
| chrUn | 28814641 | 28814826 | 186 SAT1_CF  | blue   | na |
| chrUn | 28814843 | 28816047 | 1205 SAT1_CF | blue   | na |
| chrUn | 28816072 | 28816406 | 335 SAT1_CF  | blue   | na |
| chrUn | 28816485 | 28817232 | 748 SAT1_CF  | blue   | na |
| chrUn | 28817284 | 28817809 | 526 SAT1_CF  | blue   | na |
| chrUn | 28817821 | 28817927 | 107 SAT1_CF  | blue   | na |
| chrUn | 28817951 | 28818578 | 628 SAT1_CF  | blue   | na |
| chrUn | 28818613 | 28819461 | 849 SAT1_CF  | blue   | na |
| chrUn | 28819479 | 28820165 | 687 SAT1_CF  | blue   | na |
| chrUn | 28820177 | 28820850 | 674 SAT1_CF  | blue   | na |
| chrUn | 28820894 | 28821437 | 544 SAT1_CF  | blue   | na |
| chrUn | 28821455 | 28822141 | 687 SAT1_CF  | blue   | na |
| chrUn | 28822153 | 28823003 | 851 SAT1_CF  | blue   | na |
| chrUn | 28823016 | 28823631 | 616 SAT1_CF  | blue   | na |
| chrUn | 28823673 | 28824857 | 1185 SAT1_CF | blue   | na |
| chrUn | 28824944 | 28825441 | 498 SAT1_CF  | blue   | na |
| chrUn | 28825459 | 28825561 | 103 SAT1_CF  | blue   | na |
| chrUn | 28825582 | 28826137 | 556 SAT1_CF  | blue   | na |
| chrUn | 28826150 | 28827388 | 1239 SAT1_CF | blue   | na |
| chrUn | 28827431 | 28828394 | 964 SAT1_CF  | blue   | na |
| chrUn | 28828461 | 28828973 | 513 SAT1_CF  | blue   | na |
| chrUn | 28829016 | 28829386 | 371 SAT1_CF  | blue   | na |
| chrUn | 28829441 | 28829923 | 483 SAT1_CF  | blue   | na |
| chrUn | 28829935 | 28830620 | 686 SAT1_CF  | blue   | na |
| chrUn | 28830642 | 28831307 | 666 SAT1_CF  | blue   | na |
| chrUn | 28831352 | 28832680 | 1329 SAT1_CF | blue   | na |

|       |          |          |              |      |    |
|-------|----------|----------|--------------|------|----|
| chrUn | 28832692 | 28833553 | 862 SAT1_CF  | blue | na |
| chrUn | 28833566 | 28833674 | 109 SAT1_CF  | blue | na |
| chrUn | 28833695 | 28835552 | 1858 SAT1_CF | blue | na |
| chrUn | 28835565 | 28838252 | 2688 SAT1_CF | blue | na |
| chrUn | 28838294 | 28839203 | 910 SAT1_CF  | blue | na |
| chrUn | 28839276 | 28839757 | 482 SAT1_CF  | blue | na |
| chrUn | 28839770 | 28840453 | 684 SAT1_CF  | blue | na |
| chrUn | 28840465 | 28841140 | 676 SAT1_CF  | blue | na |
| chrUn | 28841183 | 28842193 | 1011 SAT1_CF | blue | na |
| chrUn | 28842274 | 28843231 | 958 SAT1_CF  | blue | na |
| chrUn | 28843274 | 28843776 | 503 SAT1_CF  | blue | na |
| chrUn | 28843789 | 28844426 | 638 SAT1_CF  | blue | na |
| chrUn | 28844441 | 28845254 | 814 SAT1_CF  | blue | na |
| chrUn | 28845306 | 28846007 | 702 SAT1_CF  | blue | na |
| chrUn | 28846019 | 28846125 | 107 SAT1_CF  | blue | na |
| chrUn | 28846149 | 28846777 | 629 SAT1_CF  | blue | na |
| chrUn | 28846812 | 28847661 | 850 SAT1_CF  | blue | na |
| chrUn | 28847679 | 28848365 | 687 SAT1_CF  | blue | na |
| chrUn | 28848377 | 28849227 | 851 SAT1_CF  | blue | na |
| chrUn | 28849277 | 28849976 | 700 SAT1_CF  | blue | na |
| chrUn | 28849990 | 28851528 | 1539 SAT1_CF | blue | na |
| chrUn | 28851541 | 28851648 | 108 SAT1_CF  | blue | na |
| chrUn | 28851670 | 28852224 | 555 SAT1_CF  | blue | na |
| chrUn | 28852236 | 28853723 | 1488 SAT1_CF | blue | na |
| chrUn | 28853763 | 28855880 | 2118 SAT1_CF | blue | na |
| chrUn | 28855908 | 28856042 | 135 SAT1_CF  | blue | na |
| chrUn | 28856110 | 28857078 | 969 SAT1_CF  | blue | na |
| chrUn | 28857090 | 28857774 | 685 SAT1_CF  | blue | na |
| chrUn | 28857787 | 28858626 | 840 SAT1_CF  | blue | na |
| chrUn | 28858639 | 28859831 | 1193 SAT1_CF | blue | na |
| chrUn | 28859843 | 28861876 | 2034 SAT1_CF | blue | na |
| chrUn | 28862058 | 28862239 | 182 SAT1_CF  | blue | na |
| chrUn | 28862279 | 28862858 | 580 SAT1_CF  | blue | na |
| chrUn | 28862920 | 28863720 | 801 SAT1_CF  | blue | na |
| chrUn | 28863737 | 28863889 | 153 SAT1_CF  | blue | na |
| chrUn | 28863911 | 28864417 | 507 SAT1_CF  | blue | na |
| chrUn | 28864437 | 28865042 | 606 SAT1_CF  | blue | na |
| chrUn | 28865057 | 28865459 | 403 SAT1_CF  | blue | na |
| chrUn | 28865499 | 28866074 | 576 SAT1_CF  | blue | na |
| chrUn | 28866096 | 28866770 | 675 SAT1_CF  | blue | na |
| chrUn | 28866782 | 28867644 | 863 SAT1_CF  | blue | na |
| chrUn | 28867686 | 28868317 | 632 SAT1_CF  | blue | na |

|       |          |          |              |      |    |
|-------|----------|----------|--------------|------|----|
| chrUn | 28868345 | 28868908 | 564 SAT1_CF  | blue | na |
| chrUn | 28868988 | 28869464 | 477 SAT1_CF  | blue | na |
| chrUn | 28869527 | 28869663 | 137 SAT1_CF  | blue | na |
| chrUn | 28869710 | 28870230 | 521 SAT1_CF  | blue | na |
| chrUn | 28870242 | 28870916 | 675 SAT1_CF  | blue | na |
| chrUn | 28870959 | 28872051 | 1093 SAT1_CF | blue | na |
| chrUn | 28872063 | 28872574 | 512 SAT1_CF  | blue | na |
| chrUn | 28872654 | 28873235 | 582 SAT1_CF  | blue | na |
| chrUn | 28873259 | 28873923 | 665 SAT1_CF  | blue | na |
| chrUn | 28873966 | 28875484 | 1519 SAT1_CF | blue | na |
| chrUn | 28877068 | 28877817 | 750 SAT1_CF  | blue | na |
| chrUn | 28877829 | 28879634 | 1806 SAT1_CF | blue | na |
| chrUn | 28879652 | 28880584 | 933 SAT1_CF  | blue | na |
| chrUn | 28880626 | 28881128 | 503 SAT1_CF  | blue | na |
| chrUn | 28881140 | 28881824 | 685 SAT1_CF  | blue | na |
| chrUn | 28881867 | 28883238 | 1372 SAT1_CF | blue | na |
| chrUn | 28883317 | 28883866 | 550 SAT1_CF  | blue | na |
| chrUn | 28883902 | 28884276 | 375 SAT1_CF  | blue | na |
| chrUn | 28884316 | 28884904 | 589 SAT1_CF  | blue | na |
| chrUn | 28884960 | 28885512 | 553 SAT1_CF  | blue | na |
| chrUn | 28885530 | 28886119 | 590 SAT1_CF  | blue | na |
| chrUn | 28886131 | 28886214 | 84 SAT1_CF   | blue | na |
| chrUn | 28886227 | 28887174 | 948 SAT1_CF  | blue | na |
| chrUn | 28887227 | 28887729 | 503 SAT1_CF  | blue | na |
| chrUn | 28887742 | 28888227 | 486 SAT1_CF  | blue | na |
| chrUn | 28888328 | 28889024 | 697 SAT1_CF  | blue | na |
| chrUn | 28889067 | 28890049 | 983 SAT1_CF  | blue | na |
| chrUn | 28890104 | 28890707 | 604 SAT1_CF  | blue | na |
| chrUn | 28890790 | 28891109 | 320 SAT1_CF  | blue | na |
| chrUn | 28891143 | 28891657 | 515 SAT1_CF  | blue | na |
| chrUn | 28891691 | 28892317 | 627 SAT1_CF  | blue | na |
| chrUn | 28892362 | 28892992 | 631 SAT1_CF  | blue | na |
| chrUn | 28893020 | 28893582 | 563 SAT1_CF  | blue | na |
| chrUn | 28893662 | 28894171 | 510 SAT1_CF  | blue | na |
| chrUn | 28894199 | 28894332 | 134 SAT1_CF  | blue | na |
| chrUn | 28894390 | 28895587 | 1198 SAT1_CF | blue | na |
| chrUn | 28895599 | 28896268 | 670 SAT1_CF  | blue | na |
| chrUn | 28896310 | 28897275 | 966 SAT1_CF  | blue | na |
| chrUn | 28897320 | 28898271 | 952 SAT1_CF  | blue | na |
| chrUn | 28898314 | 28898815 | 502 SAT1_CF  | blue | na |
| chrUn | 28898827 | 28898933 | 107 SAT1_CF  | blue | na |
| chrUn | 28898956 | 28899511 | 556 SAT1_CF  | blue | na |

|       |          |          |              |      |    |
|-------|----------|----------|--------------|------|----|
| chrUn | 28899523 | 28899632 | 110 SAT1_CF  | blue | na |
| chrUn | 28899652 | 28901914 | 2263 SAT1_CF | blue | na |
| chrUn | 28901925 | 28902922 | 998 SAT1_CF  | blue | na |
| chrUn | 28902937 | 28903093 | 157 SAT1_CF  | blue | na |
| chrUn | 28903138 | 28903639 | 502 SAT1_CF  | blue | na |
| chrUn | 28903651 | 28903767 | 117 SAT1_CF  | blue | na |
| chrUn | 28903781 | 28904306 | 526 SAT1_CF  | blue | na |
| chrUn | 28904362 | 28904908 | 547 SAT1_CF  | blue | na |
| chrUn | 28904951 | 28905582 | 632 SAT1_CF  | blue | na |
| chrUn | 28905613 | 28906252 | 640 SAT1_CF  | blue | na |
| chrUn | 28906317 | 28908283 | 1967 SAT1_CF | blue | na |
| chrUn | 28908296 | 28909519 | 1224 SAT1_CF | blue | na |
| chrUn | 28909562 | 28910542 | 981 SAT1_CF  | blue | na |
| chrUn | 28910587 | 28911614 | 1028 SAT1_CF | blue | na |
| chrUn | 28911638 | 28912247 | 610 SAT1_CF  | blue | na |
| chrUn | 28912300 | 28912817 | 518 SAT1_CF  | blue | na |
| chrUn | 28912860 | 28915413 | 2554 SAT1_CF | blue | na |
| chrUn | 28916200 | 28917236 | 1037 SAT1_CF | blue | na |
| chrUn | 28917247 | 28917566 | 320 SAT1_CF  | blue | na |
| chrUn | 28917619 | 28918120 | 502 SAT1_CF  | blue | na |
| chrUn | 28918132 | 28918805 | 674 SAT1_CF  | blue | na |
| chrUn | 28918844 | 28920012 | 1169 SAT1_CF | blue | na |
| chrUn | 28920109 | 28920657 | 549 SAT1_CF  | blue | na |
| chrUn | 28920689 | 28921065 | 377 SAT1_CF  | blue | na |
| chrUn | 28921108 | 28921609 | 502 SAT1_CF  | blue | na |
| chrUn | 28921621 | 28923453 | 1833 SAT1_CF | blue | na |
| chrUn | 28923532 | 28924042 | 511 SAT1_CF  | blue | na |
| chrUn | 28924070 | 28924227 | 158 SAT1_CF  | blue | na |
| chrUn | 28924272 | 28924772 | 501 SAT1_CF  | blue | na |
| chrUn | 28924794 | 28926857 | 2064 SAT1_CF | blue | na |
| chrUn | 28926877 | 28927077 | 201 SAT1_CF  | blue | na |
| chrUn | 28927090 | 28928447 | 1358 SAT1_CF | blue | na |
| chrUn | 28928490 | 28930778 | 2289 SAT1_CF | blue | na |
| chrUn | 28930821 | 28931322 | 502 SAT1_CF  | blue | na |
| chrUn | 28931340 | 28932016 | 677 SAT1_CF  | blue | na |
| chrUn | 28932030 | 28933288 | 1259 SAT1_CF | blue | na |
| chrUn | 28933375 | 28933867 | 493 SAT1_CF  | blue | na |
| chrUn | 28933887 | 28934657 | 771 SAT1_CF  | blue | na |
| chrUn | 28934676 | 28937085 | 2410 SAT1_CF | blue | na |
| chrUn | 28937110 | 28938575 | 1466 SAT1_CF | blue | na |
| chrUn | 28938587 | 28940974 | 2388 SAT1_CF | blue | na |
| chrUn | 28941162 | 28941505 | 344 SAT1_CF  | blue | na |

|       |          |          |              |      |    |
|-------|----------|----------|--------------|------|----|
| chrUn | 28941573 | 28943497 | 1925 SAT1_CF | blue | na |
| chrUn | 28943554 | 28944089 | 536 SAT1_CF  | blue | na |
| chrUn | 28944169 | 28944678 | 510 SAT1_CF  | blue | na |
| chrUn | 28944706 | 28944863 | 158 SAT1_CF  | blue | na |
| chrUn | 28944889 | 28945410 | 522 SAT1_CF  | blue | na |
| chrUn | 28945422 | 28945494 | 73 SAT1_CF   | blue | na |
| chrUn | 28945551 | 28946303 | 753 SAT1_CF  | blue | na |
| chrUn | 28946325 | 28946869 | 545 SAT1_CF  | blue | na |
| chrUn | 28946912 | 28948283 | 1372 SAT1_CF | blue | na |
| chrUn | 28948305 | 28948979 | 675 SAT1_CF  | blue | na |
| chrUn | 28948991 | 28951243 | 2253 SAT1_CF | blue | na |
| chrUn | 28951261 | 28952240 | 980 SAT1_CF  | blue | na |
| chrUn | 28952264 | 28952668 | 405 SAT1_CF  | blue | na |
| chrUn | 28952706 | 28953210 | 505 SAT1_CF  | blue | na |
| chrUn | 28953228 | 28953912 | 685 SAT1_CF  | blue | na |
| chrUn | 28953924 | 28956997 | 3074 SAT1_CF | blue | na |
| chrUn | 28957065 | 28958201 | 1137 SAT1_CF | blue | na |
| chrUn | 28958215 | 28959585 | 1371 SAT1_CF | blue | na |
| chrUn | 28959633 | 28961397 | 1765 SAT1_CF | blue | na |
| chrUn | 28961408 | 28962014 | 607 SAT1_CF  | blue | na |
| chrUn | 28962084 | 28962638 | 555 SAT1_CF  | blue | na |
| chrUn | 28962651 | 28962722 | 72 SAT1_CF   | blue | na |
| chrUn | 28962742 | 28963937 | 1196 SAT1_CF | blue | na |
| chrUn | 28963981 | 28964952 | 972 SAT1_CF  | blue | na |
| chrUn | 28964963 | 28965611 | 649 SAT1_CF  | blue | na |
| chrUn | 28965690 | 28966321 | 632 SAT1_CF  | blue | na |
| chrUn | 28966333 | 28967013 | 681 SAT1_CF  | blue | na |
| chrUn | 28967025 | 28967701 | 677 SAT1_CF  | blue | na |
| chrUn | 28967748 | 28968703 | 956 SAT1_CF  | blue | na |
| chrUn | 28968782 | 28969289 | 508 SAT1_CF  | blue | na |
| chrUn | 28969303 | 28969705 | 403 SAT1_CF  | blue | na |
| chrUn | 28969764 | 28970330 | 567 SAT1_CF  | blue | na |
| chrUn | 28970351 | 28971390 | 1040 SAT1_CF | blue | na |
| chrUn | 28971423 | 28972306 | 884 SAT1_CF  | blue | na |
| chrUn | 28972395 | 28973591 | 1197 SAT1_CF | blue | na |
| chrUn | 28973603 | 28974268 | 666 SAT1_CF  | blue | na |
| chrUn | 28974337 | 28974882 | 546 SAT1_CF  | blue | na |
| chrUn | 28974923 | 28975468 | 546 SAT1_CF  | blue | na |
| chrUn | 28975510 | 28975789 | 280 SAT1_CF  | blue | na |
| chrUn | 28975805 | 28976327 | 523 SAT1_CF  | blue | na |
| chrUn | 28976357 | 28976740 | 384 SAT1_CF  | blue | na |
| chrUn | 28976778 | 28977276 | 499 SAT1_CF  | blue | na |

|       |          |          |              |        |    |
|-------|----------|----------|--------------|--------|----|
| chrUn | 28977294 | 28977397 | 104 SAT1_CF  | blue   | na |
| chrUn | 28977418 | 28979333 | 1916 SAT1_CF | blue   | na |
| chrUn | 28979348 | 28979484 | 137 SAT1_CF  | blue   | na |
| chrUn | 28979580 | 28980099 | 520 SAT1_CF  | blue   | na |
| chrUn | 28980156 | 28980701 | 546 SAT1_CF  | blue   | na |
| chrUn | 28980781 | 28981324 | 544 SAT1_CF  | blue   | na |
| chrUn | 28981421 | 28982563 | 1143 SAT1_CF | blue   | na |
| chrUn | 28982605 | 28983103 | 499 SAT1_CF  | blue   | na |
| chrUn | 28983120 | 28983799 | 680 SAT1_CF  | blue   | na |
| chrUn | 28983812 | 28983887 | 76 SAT1_CF   | blue   | na |
| chrUn | 28983905 | 28984413 | 509 SAT1_CF  | blue   | na |
| chrUn | 28984425 | 28986106 | 1682 SAT1_CF | blue   | na |
| chrUn | 28986185 | 28986731 | 547 SAT1_CF  | blue   | na |
| chrUn | 28986774 | 28987312 | 539 SAT1_CF  | blue   | na |
| chrUn | 28987393 | 28987930 | 538 SAT1_CF  | blue   | na |
| chrUn | 28987947 | 28988607 | 661 SAT1_CF  | blue   | na |
| chrUn | 28988655 | 28989188 | 534 SAT1_CF  | blue   | na |
| chrUn | 28989222 | 28991301 | 2080 SAT1_CF | blue   | na |
| chrUn | 28991497 | 28992772 | 1276 SAT1_CF | blue   | na |
| chrUn | 28992796 | 28993587 | 792 SAT1_CF  | blue   | na |
| chrUn | 29236836 | 29237509 | 674 Sat7CF   | lime   | na |
| chrUn | 29239817 | 29239868 | 52 Sat109CF  | na     | na |
| chrUn | 29239817 | 29239868 | 52 Sat109CF  | na     | na |
| chrUn | 29344043 | 29344711 | 669 Sat7CF   | lime   | na |
| chrUn | 29344121 | 29344704 | 584 Sat7CF   | lime   | na |
| chrUn | 29393654 | 29394902 | 1249 Sat2CF  | purple | na |
| chrUn | 29408189 | 29409357 | 1169 Sat2CF  | purple | na |
| chrUn | 29409249 | 29409373 | 125 Sat2CF   | purple | na |
| chrUn | 29427150 | 29428370 | 1221 Sat2CF  | purple | na |
| chrUn | 29428241 | 29428390 | 150 Sat2CF   | purple | na |
| chrUn | 29439751 | 29441003 | 1253 Sat2CF  | purple | na |
| chrUn | 29457866 | 29459034 | 1169 Sat2CF  | purple | na |
| chrUn | 29458926 | 29459050 | 125 Sat2CF   | purple | na |
| chrUn | 29474138 | 29474969 | 832 Sat2CF   | purple | na |
| chrUn | 29474222 | 29474948 | 727 Sat2CF   | purple | na |
| chrUn | 29474838 | 29475006 | 169 Sat2CF   | purple | na |
| chrUn | 29487804 | 29489025 | 1222 Sat2CF  | purple | na |
| chrUn | 29504252 | 29505327 | 1076 Sat2CF  | purple | na |
| chrUn | 29534904 | 29536058 | 1155 Sat2CF  | purple | na |
| chrUn | 29562049 | 29562926 | 878 CarSat1  | red    | na |
| chrUn | 29563165 | 29564609 | 1445 CarSat1 | red    | na |
| chrUn | 29564640 | 29566228 | 1589 CarSat1 | red    | na |



|       |          |          |      |         |        |    |
|-------|----------|----------|------|---------|--------|----|
| chrUn | 29566259 | 29567848 | 1590 | CarSat1 | red    | na |
| chrUn | 29567879 | 29569467 | 1589 | CarSat1 | red    | na |
| chrUn | 29569498 | 29571086 | 1589 | CarSat1 | red    | na |
| chrUn | 29571117 | 29572705 | 1589 | CarSat1 | red    | na |
| chrUn | 29572736 | 29574324 | 1589 | CarSat1 | red    | na |
| chrUn | 29574355 | 29575943 | 1589 | CarSat1 | red    | na |
| chrUn | 29575974 | 29577562 | 1589 | CarSat1 | red    | na |
| chrUn | 29577593 | 29579181 | 1589 | CarSat1 | red    | na |
| chrUn | 29579212 | 29580801 | 1590 | CarSat1 | red    | na |
| chrUn | 29580832 | 29582829 | 1998 | CarSat1 | red    | na |
| chrUn | 29582845 | 29583730 | 886  | CarSat1 | red    | na |
| chrUn | 29583930 | 29584029 | 100  | CarSat1 | red    | na |
| chrUn | 29584047 | 29584639 | 593  | CarSat1 | red    | na |
| chrUn | 29589111 | 29589698 | 588  | CarSat1 | red    | na |
| chrUn | 29589899 | 29589998 | 100  | CarSat1 | red    | na |
| chrUn | 29590016 | 29590997 | 982  | CarSat1 | red    | na |
| chrUn | 29591031 | 29591438 | 408  | CarSat1 | red    | na |
| chrUn | 29597225 | 29598237 | 1013 | Sat2CF  | purple | na |
| chrUn | 29597288 | 29598151 | 864  | Sat2CF  | purple | na |
| chrUn | 29598112 | 29598272 | 161  | Sat2CF  | purple | na |
| chrUn | 29598466 | 29599046 | 581  | SAT1_CF | blue   | na |
| chrUn | 29599103 | 29599842 | 740  | SAT1_CF | blue   | na |
| chrUn | 29599860 | 29600262 | 403  | CarSat1 | red    | na |
| chrUn | 29600281 | 29602060 | 1780 | CarSat1 | red    | na |
| chrUn | 29602094 | 29602495 | 402  | CarSat1 | red    | na |
| chrUn | 29611525 | 29612092 | 568  | CarSat1 | red    | na |
| chrUn | 29612281 | 29612402 | 122  | CarSat1 | red    | na |
| chrUn | 29612420 | 29613215 | 796  | CarSat1 | red    | na |
| chrUn | 29613236 | 29613686 | 451  | CarSat1 | red    | na |
| chrUn | 29613859 | 29614937 | 1079 | CarSat1 | red    | na |
| chrUn | 29617590 | 29617808 | 219  | Sat2CF  | purple | na |
| chrUn | 29617648 | 29618897 | 1250 | Sat2CF  | purple | na |
| chrUn | 29617684 | 29618767 | 1084 | Sat2CF  | purple | na |
| chrUn | 29635263 | 29635431 | 169  | Sat2CF  | purple | na |
| chrUn | 29635305 | 29636103 | 799  | Sat2CF  | purple | na |
| chrUn | 29651023 | 29651200 | 178  | Sat2CF  | purple | na |
| chrUn | 29651071 | 29651625 | 555  | Sat2CF  | purple | na |
| chrUn | 29660515 | 29661692 | 1178 | Sat2CF  | purple | na |
| chrUn | 29660562 | 29661565 | 1004 | Sat2CF  | purple | na |
| chrUn | 29679969 | 29681121 | 1153 | Sat2CF  | purple | na |
| chrUn | 29694288 | 29694466 | 179  | Sat2CF  | purple | na |
| chrUn | 29694344 | 29695394 | 1051 | Sat2CF  | purple | na |

|       |          |          |      |         |      |    |
|-------|----------|----------|------|---------|------|----|
| chrUn | 29716502 | 29717205 | 704  | CarSat1 | red  | na |
| chrUn | 29717226 | 29718817 | 1592 | CarSat1 | red  | na |
| chrUn | 29718838 | 29719691 | 854  | CarSat1 | red  | na |
| chrUn | 29719713 | 29720568 | 856  | CarSat1 | red  | na |
| chrUn | 29720589 | 29721367 | 779  | CarSat1 | red  | na |
| chrUn | 29721381 | 29721824 | 444  | CarSat1 | red  | na |
| chrUn | 29721827 | 29722212 | 386  | SAT1_CF | blue | na |
| chrUn | 29722224 | 29722840 | 617  | SAT1_CF | blue | na |
| chrUn | 29722835 | 29723559 | 725  | CarSat1 | red  | na |
| chrUn | 29723718 | 29724017 | 300  | CarSat1 | red  | na |
| chrUn | 29725420 | 29726081 | 662  | SAT1_CF | blue | na |
| chrUn | 29726093 | 29727279 | 1187 | SAT1_CF | blue | na |
| chrUn | 29727292 | 29727895 | 604  | SAT1_CF | blue | na |
| chrUn | 29727907 | 29728582 | 676  | SAT1_CF | blue | na |
| chrUn | 29728625 | 29729620 | 996  | SAT1_CF | blue | na |
| chrUn | 29729664 | 29730623 | 960  | SAT1_CF | blue | na |
| chrUn | 29730663 | 29731164 | 502  | SAT1_CF | blue | na |
| chrUn | 29731177 | 29731859 | 683  | SAT1_CF | blue | na |
| chrUn | 29731871 | 29732544 | 674  | SAT1_CF | blue | na |
| chrUn | 29732560 | 29732844 | 285  | SAT1_CF | blue | na |
| chrUn | 29732864 | 29733408 | 545  | SAT1_CF | blue | na |
| chrUn | 29733454 | 29734147 | 694  | SAT1_CF | blue | na |
| chrUn | 29734159 | 29734811 | 653  | SAT1_CF | blue | na |
| chrUn | 29734846 | 29735645 | 800  | SAT1_CF | blue | na |
| chrUn | 29735657 | 29736515 | 859  | SAT1_CF | blue | na |
| chrUn | 29736557 | 29737453 | 897  | SAT1_CF | blue | na |
| chrUn | 29737471 | 29738435 | 965  | SAT1_CF | blue | na |
| chrUn | 29738483 | 29738980 | 498  | SAT1_CF | blue | na |
| chrUn | 29738998 | 29739663 | 666  | SAT1_CF | blue | na |
| chrUn | 29739689 | 29740149 | 461  | SAT1_CF | blue | na |
| chrUn | 29740191 | 29740730 | 540  | SAT1_CF | blue | na |
| chrUn | 29740749 | 29742087 | 1339 | SAT1_CF | blue | na |
| chrUn | 29742205 | 29742724 | 520  | SAT1_CF | blue | na |
| chrUn | 29742781 | 29743950 | 1170 | SAT1_CF | blue | na |
| chrUn | 29744031 | 29746751 | 2721 | SAT1_CF | blue | na |
| chrUn | 29746776 | 29747687 | 912  | SAT1_CF | blue | na |
| chrUn | 29747709 | 29748383 | 675  | SAT1_CF | blue | na |
| chrUn | 29748395 | 29749071 | 677  | SAT1_CF | blue | na |
| chrUn | 29749114 | 29750079 | 966  | SAT1_CF | blue | na |
| chrUn | 29750158 | 29751112 | 955  | SAT1_CF | blue | na |
| chrUn | 29751152 | 29751653 | 502  | SAT1_CF | blue | na |
| chrUn | 29751680 | 29752350 | 671  | SAT1_CF | blue | na |

|       |          |          |              |      |    |
|-------|----------|----------|--------------|------|----|
| chrUn | 29752362 | 29753402 | 1041 SAT1_CF | blue | na |
| chrUn | 29753416 | 29754053 | 638 SAT1_CF  | blue | na |
| chrUn | 29754066 | 29755105 | 1040 SAT1_CF | blue | na |
| chrUn | 29755184 | 29755752 | 569 SAT1_CF  | blue | na |
| chrUn | 29755765 | 29756448 | 684 SAT1_CF  | blue | na |
| chrUn | 29756528 | 29757016 | 489 SAT1_CF  | blue | na |
| chrUn | 29757067 | 29757224 | 158 SAT1_CF  | blue | na |
| chrUn | 29757269 | 29757770 | 502 SAT1_CF  | blue | na |
| chrUn | 29757781 | 29759157 | 1377 SAT1_CF | blue | na |
| chrUn | 29759199 | 29760049 | 851 SAT1_CF  | blue | na |
| chrUn | 29760119 | 29760664 | 546 SAT1_CF  | blue | na |
| chrUn | 29760711 | 29761667 | 957 SAT1_CF  | blue | na |
| chrUn | 29761711 | 29762253 | 543 SAT1_CF  | blue | na |
| chrUn | 29762267 | 29762666 | 400 SAT1_CF  | blue | na |
| chrUn | 29762728 | 29763208 | 481 SAT1_CF  | blue | na |
| chrUn | 29763221 | 29764354 | 1134 SAT1_CF | blue | na |
| chrUn | 29764387 | 29765269 | 883 SAT1_CF  | blue | na |
| chrUn | 29765358 | 29765851 | 494 SAT1_CF  | blue | na |
| chrUn | 29765870 | 29766553 | 684 SAT1_CF  | blue | na |
| chrUn | 29766565 | 29767241 | 677 SAT1_CF  | blue | na |
| chrUn | 29767310 | 29768623 | 1314 SAT1_CF | blue | na |
| chrUn | 29768661 | 29769883 | 1223 SAT1_CF | blue | na |
| chrUn | 29769970 | 29770468 | 499 SAT1_CF  | blue | na |
| chrUn | 29770481 | 29771183 | 703 SAT1_CF  | blue | na |
| chrUn | 29771195 | 29771855 | 661 SAT1_CF  | blue | na |
| chrUn | 29771903 | 29772436 | 534 SAT1_CF  | blue | na |
| chrUn | 29772465 | 29773130 | 666 SAT1_CF  | blue | na |
| chrUn | 29773174 | 29774551 | 1378 SAT1_CF | blue | na |
| chrUn | 29774746 | 29775246 | 501 SAT1_CF  | blue | na |
| chrUn | 29775264 | 29776684 | 1421 SAT1_CF | blue | na |
| chrUn | 29776726 | 29777272 | 547 SAT1_CF  | blue | na |
| chrUn | 29777285 | 29777687 | 403 SAT1_CF  | blue | na |
| chrUn | 29777727 | 29778228 | 502 SAT1_CF  | blue | na |
| chrUn | 29778241 | 29779578 | 1338 SAT1_CF | blue | na |
| chrUn | 29779657 | 29780181 | 525 SAT1_CF  | blue | na |
| chrUn | 29780196 | 29780984 | 789 SAT1_CF  | blue | na |
| chrUn | 29781040 | 29781594 | 555 SAT1_CF  | blue | na |
| chrUn | 29781606 | 29782778 | 1173 SAT1_CF | blue | na |
| chrUn | 29782859 | 29783650 | 792 SAT1_CF  | blue | na |
| chrUn | 29783830 | 29784014 | 185 SAT1_CF  | blue | na |
| chrUn | 29784074 | 29784547 | 474 SAT1_CF  | blue | na |
| chrUn | 29784567 | 29784672 | 106 SAT1_CF  | blue | na |

|       |          |          |              |      |    |
|-------|----------|----------|--------------|------|----|
| chrUn | 29784695 | 29785955 | 1261 SAT1_CF | blue | na |
| chrUn | 29785983 | 29786140 | 158 SAT1_CF  | blue | na |
| chrUn | 29786166 | 29787292 | 1127 SAT1_CF | blue | na |
| chrUn | 29787319 | 29789421 | 2103 SAT1_CF | blue | na |
| chrUn | 29789464 | 29790807 | 1344 SAT1_CF | blue | na |
| chrUn | 29790851 | 29791352 | 502 SAT1_CF  | blue | na |
| chrUn | 29791366 | 29791974 | 609 SAT1_CF  | blue | na |
| chrUn | 29791986 | 29792821 | 836 SAT1_CF  | blue | na |
| chrUn | 29793002 | 29793187 | 186 SAT1_CF  | blue | na |
| chrUn | 29793223 | 29793725 | 503 SAT1_CF  | blue | na |
| chrUn | 29793743 | 29794499 | 757 SAT1_CF  | blue | na |
| chrUn | 29794523 | 29796503 | 1981 SAT1_CF | blue | na |
| chrUn | 29796685 | 29797405 | 721 SAT1_CF  | blue | na |
| chrUn | 29797418 | 29798030 | 613 SAT1_CF  | blue | na |
| chrUn | 29798042 | 29798712 | 671 SAT1_CF  | blue | na |
| chrUn | 29798755 | 29800123 | 1369 SAT1_CF | blue | na |
| chrUn | 29800166 | 29800714 | 549 SAT1_CF  | blue | na |
| chrUn | 29800737 | 29803644 | 2908 SAT1_CF | blue | na |
| chrUn | 29803689 | 29804687 | 999 SAT1_CF  | blue | na |
| chrUn | 29804732 | 29805584 | 853 SAT1_CF  | blue | na |
| chrUn | 29805674 | 29806193 | 520 SAT1_CF  | blue | na |
| chrUn | 29806205 | 29806342 | 138 SAT1_CF  | blue | na |
| chrUn | 29806385 | 29808320 | 1936 SAT1_CF | blue | na |
| chrUn | 29808335 | 29809114 | 780 SAT1_CF  | blue | na |
| chrUn | 29809126 | 29809802 | 677 SAT1_CF  | blue | na |
| chrUn | 29809845 | 29811281 | 1437 SAT1_CF | blue | na |
| chrUn | 29811370 | 29811869 | 500 SAT1_CF  | blue | na |
| chrUn | 29811883 | 29812556 | 674 SAT1_CF  | blue | na |
| chrUn | 29812575 | 29813152 | 578 SAT1_CF  | blue | na |
| chrUn | 29813192 | 29813691 | 500 SAT1_CF  | blue | na |
| chrUn | 29813718 | 29814466 | 749 SAT1_CF  | blue | na |
| chrUn | 29814478 | 29815144 | 667 SAT1_CF  | blue | na |
| chrUn | 29815192 | 29816280 | 1089 SAT1_CF | blue | na |
| chrUn | 29816291 | 29816812 | 522 SAT1_CF  | blue | na |
| chrUn | 29816856 | 29817250 | 395 SAT1_CF  | blue | na |
| chrUn | 29817263 | 29817848 | 586 SAT1_CF  | blue | na |
| chrUn | 29817904 | 29818478 | 575 SAT1_CF  | blue | na |
| chrUn | 29818490 | 29819150 | 661 SAT1_CF  | blue | na |
| chrUn | 29819198 | 29819737 | 540 SAT1_CF  | blue | na |
| chrUn | 29819759 | 29820424 | 666 SAT1_CF  | blue | na |
| chrUn | 29820468 | 29821025 | 558 SAT1_CF  | blue | na |
| chrUn | 29821105 | 29821629 | 525 SAT1_CF  | blue | na |

|       |          |          |              |      |    |
|-------|----------|----------|--------------|------|----|
| chrUn | 29821644 | 29822345 | 702 SAT1_CF  | blue | na |
| chrUn | 29822358 | 29822589 | 232 SAT1_CF  | blue | na |
| chrUn | 29822486 | 29825477 | 2992 SAT1_CF | blue | na |
| chrUn | 29825658 | 29825843 | 186 SAT1_CF  | blue | na |
| chrUn | 29825879 | 29826378 | 500 SAT1_CF  | blue | na |
| chrUn | 29826392 | 29827005 | 614 SAT1_CF  | blue | na |
| chrUn | 29827017 | 29827868 | 852 SAT1_CF  | blue | na |
| chrUn | 29827919 | 29828699 | 781 SAT1_CF  | blue | na |
| chrUn | 29828765 | 29829277 | 513 SAT1_CF  | blue | na |
| chrUn | 29829302 | 29829403 | 102 SAT1_CF  | blue | na |
| chrUn | 29829424 | 29829978 | 555 SAT1_CF  | blue | na |
| chrUn | 29829990 | 29830664 | 675 SAT1_CF  | blue | na |
| chrUn | 29830679 | 29830849 | 171 SAT1_CF  | blue | na |
| chrUn | 29830862 | 29832228 | 1367 SAT1_CF | blue | na |
| chrUn | 29832241 | 29832886 | 646 SAT1_CF  | blue | na |
| chrUn | 29832911 | 29833236 | 326 SAT1_CF  | blue | na |
| chrUn | 29833316 | 29833822 | 507 SAT1_CF  | blue | na |
| chrUn | 29833843 | 29834238 | 396 SAT1_CF  | blue | na |
| chrUn | 29834278 | 29834778 | 501 SAT1_CF  | blue | na |
| chrUn | 29834796 | 29835843 | 1048 SAT1_CF | blue | na |
| chrUn | 29835864 | 29836406 | 543 SAT1_CF  | blue | na |
| chrUn | 29836476 | 29837677 | 1202 SAT1_CF | blue | na |
| chrUn | 29837721 | 29838027 | 307 SAT1_CF  | blue | na |
| chrUn | 29838107 | 29838612 | 506 SAT1_CF  | blue | na |
| chrUn | 29838627 | 29840265 | 1639 SAT1_CF | blue | na |
| chrUn | 29840307 | 29841365 | 1059 SAT1_CF | blue | na |
| chrUn | 29841435 | 29841860 | 426 SAT1_CF  | blue | na |
| chrUn | 29841902 | 29843749 | 1848 SAT1_CF | blue | na |
| chrUn | 29843797 | 29844297 | 501 SAT1_CF  | blue | na |
| chrUn | 29844324 | 29845533 | 1210 SAT1_CF | blue | na |
| chrUn | 29845545 | 29846189 | 645 SAT1_CF  | blue | na |
| chrUn | 29846214 | 29847046 | 833 SAT1_CF  | blue | na |
| chrUn | 29847111 | 29847560 | 450 SAT1_CF  | blue | na |
| chrUn | 29847647 | 29848148 | 502 SAT1_CF  | blue | na |
| chrUn | 29848161 | 29849741 | 1581 SAT1_CF | blue | na |
| chrUn | 29849759 | 29850516 | 758 SAT1_CF  | blue | na |
| chrUn | 29850528 | 29851358 | 831 SAT1_CF  | blue | na |
| chrUn | 29851374 | 29852404 | 1031 SAT1_CF | blue | na |
| chrUn | 29852425 | 29853056 | 632 SAT1_CF  | blue | na |
| chrUn | 29853069 | 29853753 | 685 SAT1_CF  | blue | na |
| chrUn | 29853766 | 29855938 | 2173 SAT1_CF | blue | na |
| chrUn | 29857353 | 29858154 | 802 SAT1_CF  | blue | na |

|       |          |          |              |        |    |
|-------|----------|----------|--------------|--------|----|
| chrUn | 29858693 | 29859152 | 460 SAT1_CF  | blue   | na |
| chrUn | 29859194 | 29860815 | 1622 SAT1_CF | blue   | na |
| chrUn | 29860849 | 29861368 | 520 SAT1_CF  | blue   | na |
| chrUn | 29861395 | 29862055 | 661 SAT1_CF  | blue   | na |
| chrUn | 29862068 | 29862203 | 136 SAT1_CF  | blue   | na |
| chrUn | 29862245 | 29863023 | 779 SAT1_CF  | blue   | na |
| chrUn | 29863101 | 29863647 | 547 SAT1_CF  | blue   | na |
| chrUn | 29863730 | 29864309 | 580 SAT1_CF  | blue   | na |
| chrUn | 29864322 | 29865875 | 1554 SAT1_CF | blue   | na |
| chrUn | 29865917 | 29866460 | 544 SAT1_CF  | blue   | na |
| chrUn | 29866476 | 29867272 | 797 SAT1_CF  | blue   | na |
| chrUn | 29867352 | 29867862 | 511 SAT1_CF  | blue   | na |
| chrUn | 29867889 | 29868022 | 134 SAT1_CF  | blue   | na |
| chrUn | 29868102 | 29868581 | 480 SAT1_CF  | blue   | na |
| chrUn | 29868594 | 29869962 | 1369 SAT1_CF | blue   | na |
| chrUn | 29870004 | 29872492 | 2489 SAT1_CF | blue   | na |
| chrUn | 29872504 | 29873395 | 892 SAT1_CF  | blue   | na |
| chrUn | 29873408 | 29873570 | 163 SAT1_CF  | blue   | na |
| chrUn | 29873609 | 29873811 | 203 SAT1_CF  | blue   | na |
| chrUn | 29873828 | 29874372 | 545 SAT1_CF  | blue   | na |
| chrUn | 29874384 | 29875069 | 686 SAT1_CF  | blue   | na |
| chrUn | 29875087 | 29875757 | 671 SAT1_CF  | blue   | na |
| chrUn | 29875800 | 29876431 | 632 SAT1_CF  | blue   | na |
| chrUn | 29876458 | 29877573 | 1116 SAT1_CF | blue   | na |
| chrUn | 29877585 | 29879182 | 1598 SAT1_CF | blue   | na |
| chrUn | 29879205 | 29880055 | 851 SAT1_CF  | blue   | na |
| chrUn | 29880132 | 29880984 | 853 SAT1_CF  | blue   | na |
| chrUn | 29881006 | 29881941 | 936 SAT1_CF  | blue   | na |
| chrUn | 29881981 | 29883201 | 1221 SAT1_CF | blue   | na |
| chrUn | 29883233 | 29883754 | 522 SAT1_CF  | blue   | na |
| chrUn | 29883769 | 29883926 | 158 SAT1_CF  | blue   | na |
| chrUn | 29883952 | 29885301 | 1350 SAT1_CF | blue   | na |
| chrUn | 29885371 | 29885925 | 555 SAT1_CF  | blue   | na |
| chrUn | 29885937 | 29886615 | 679 SAT1_CF  | blue   | na |
| chrUn | 29886626 | 29887115 | 490 SAT1_CF  | blue   | na |
| chrUn | 29887129 | 29888759 | 1631 SAT1_CF | blue   | na |
| chrUn | 29888774 | 29889335 | 562 SAT1_CF  | blue   | na |
| chrUn | 29895540 | 29896377 | 838 Sat2CF   | purple | na |
| chrUn | 29908242 | 29909346 | 1105 Sat2CF  | purple | na |
| chrUn | 29958740 | 29959109 | 370 Sat2CF   | purple | na |
| chrUn | 29958792 | 29959618 | 827 Sat2CF   | purple | na |
| chrUn | 29975156 | 29976388 | 1233 Sat2CF  | purple | na |

|       |          |          |              |        |    |
|-------|----------|----------|--------------|--------|----|
| chrUn | 29975284 | 29976368 | 1085 Sat2CF  | purple | na |
| chrUn | 29999716 | 30000236 | 521 Sat2CF   | purple | na |
| chrUn | 30000429 | 30000904 | 476 Sat2CF   | purple | na |
| chrUn | 30000441 | 30000957 | 517 Sat2CF   | purple | na |
| chrUn | 30000802 | 30000998 | 197 Sat2CF   | purple | na |
| chrUn | 30002630 | 30003043 | 414 CarSat1  | red    | na |
| chrUn | 30003848 | 30003988 | 141 CarSat1  | red    | na |
| chrUn | 30004010 | 30005593 | 1584 CarSat1 | red    | na |
| chrUn | 30005614 | 30007201 | 1588 CarSat1 | red    | na |
| chrUn | 30007223 | 30007934 | 712 CarSat1  | red    | na |
| chrUn | 30008092 | 30009331 | 1240 CarSat1 | red    | na |
| chrUn | 30009369 | 30010250 | 882 CarSat1  | red    | na |
| chrUn | 30010245 | 30011791 | 1547 SAT1_CF | blue   | na |
| chrUn | 30011833 | 30013933 | 2101 SAT1_CF | blue   | na |
| chrUn | 30013968 | 30014190 | 223 SAT1_CF  | blue   | na |
| chrUn | 30014202 | 30014808 | 607 SAT1_CF  | blue   | na |
| chrUn | 30014819 | 30015364 | 546 SAT1_CF  | blue   | na |
| chrUn | 30015377 | 30016345 | 969 SAT1_CF  | blue   | na |
| chrUn | 30016389 | 30016911 | 523 SAT1_CF  | blue   | na |
| chrUn | 30023208 | 30026906 | 3699 SAT1_CF | blue   | na |
| chrUn | 30026950 | 30028151 | 1202 SAT1_CF | blue   | na |
| chrUn | 30028191 | 30028889 | 699 SAT1_CF  | blue   | na |
| chrUn | 30028931 | 30031236 | 2306 SAT1_CF | blue   | na |
| chrUn | 30031241 | 30032651 | 1411 CarSat1 | red    | na |
| chrUn | 30297091 | 30297984 | 894 Sat21CF  | na     | na |
| chrUn | 30297150 | 30297941 | 792 Sat18CF  | na     | na |
| chrUn | 30336964 | 30337317 | 354 SAT1_CF  | blue   | na |
| chrUn | 30337359 | 30337991 | 633 SAT1_CF  | blue   | na |
| chrUn | 30338011 | 30338114 | 104 SAT1_CF  | blue   | na |
| chrUn | 30338132 | 30338682 | 551 SAT1_CF  | blue   | na |
| chrUn | 30338693 | 30339322 | 630 SAT1_CF  | blue   | na |
| chrUn | 30339334 | 30339902 | 569 SAT1_CF  | blue   | na |
| chrUn | 30339915 | 30340677 | 763 SAT1_CF  | blue   | na |
| chrUn | 30340689 | 30341303 | 615 SAT1_CF  | blue   | na |
| chrUn | 30341353 | 30342488 | 1136 SAT1_CF | blue   | na |
| chrUn | 30342510 | 30343141 | 632 SAT1_CF  | blue   | na |
| chrUn | 30343167 | 30343270 | 104 SAT1_CF  | blue   | na |
| chrUn | 30343283 | 30345043 | 1761 SAT1_CF | blue   | na |
| chrUn | 30345114 | 30345657 | 544 SAT1_CF  | blue   | na |
| chrUn | 30345703 | 30346249 | 547 SAT1_CF  | blue   | na |
| chrUn | 30346328 | 30347953 | 1626 SAT1_CF | blue   | na |
| chrUn | 30347976 | 30348651 | 676 SAT1_CF  | blue   | na |

|       |          |          |              |      |    |
|-------|----------|----------|--------------|------|----|
| chrUn | 30348673 | 30349175 | 503 SAT1_CF  | blue | na |
| chrUn | 30349214 | 30349614 | 401 SAT1_CF  | blue | na |
| chrUn | 30349627 | 30350173 | 547 SAT1_CF  | blue | na |
| chrUn | 30350233 | 30350378 | 146 SAT1_CF  | blue | na |
| chrUn | 30350417 | 30351069 | 653 SAT1_CF  | blue | na |
| chrUn | 30351081 | 30351763 | 683 SAT1_CF  | blue | na |
| chrUn | 30351776 | 30352667 | 892 SAT1_CF  | blue | na |
| chrUn | 30352679 | 30353358 | 680 SAT1_CF  | blue | na |
| chrUn | 30353370 | 30354528 | 1159 SAT1_CF | blue | na |
| chrUn | 30354600 | 30355956 | 1357 SAT1_CF | blue | na |
| chrUn | 30355970 | 30356445 | 476 SAT1_CF  | blue | na |
| chrUn | 30356456 | 30357105 | 650 SAT1_CF  | blue | na |
| chrUn | 30357160 | 30358145 | 986 SAT1_CF  | blue | na |
| chrUn | 30358156 | 30358776 | 621 SAT1_CF  | blue | na |
| chrUn | 30358806 | 30358900 | 95 SAT1_CF   | blue | na |
| chrUn | 30358918 | 30359439 | 522 SAT1_CF  | blue | na |
| chrUn | 30359507 | 30360842 | 1336 SAT1_CF | blue | na |
| chrUn | 30360886 | 30362216 | 1331 SAT1_CF | blue | na |
| chrUn | 30362228 | 30362781 | 554 SAT1_CF  | blue | na |
| chrUn | 30362805 | 30362895 | 91 SAT1_CF   | blue | na |
| chrUn | 30362922 | 30363443 | 522 SAT1_CF  | blue | na |
| chrUn | 30363464 | 30363839 | 376 SAT1_CF  | blue | na |
| chrUn | 30363872 | 30364381 | 510 SAT1_CF  | blue | na |
| chrUn | 30364497 | 30365113 | 617 SAT1_CF  | blue | na |
| chrUn | 30365131 | 30365684 | 554 SAT1_CF  | blue | na |
| chrUn | 30365705 | 30365804 | 100 SAT1_CF  | blue | na |
| chrUn | 30365833 | 30366326 | 494 SAT1_CF  | blue | na |
| chrUn | 30366361 | 30366528 | 168 SAT1_CF  | blue | na |
| chrUn | 30366580 | 30367067 | 488 SAT1_CF  | blue | na |
| chrUn | 30367147 | 30367820 | 674 SAT1_CF  | blue | na |
| chrUn | 30367833 | 30368362 | 530 SAT1_CF  | blue | na |
| chrUn | 30368407 | 30369464 | 1058 SAT1_CF | blue | na |
| chrUn | 30369487 | 30369556 | 70 SAT1_CF   | blue | na |
| chrUn | 30369571 | 30370123 | 553 SAT1_CF  | blue | na |
| chrUn | 30370188 | 30370427 | 240 SAT1_CF  | blue | na |
| chrUn | 30370442 | 30371647 | 1206 SAT1_CF | blue | na |
| chrUn | 30371691 | 30372598 | 908 SAT1_CF  | blue | na |
| chrUn | 30372641 | 30373318 | 678 SAT1_CF  | blue | na |
| chrUn | 30373330 | 30373962 | 633 SAT1_CF  | blue | na |
| chrUn | 30373976 | 30374092 | 117 SAT1_CF  | blue | na |
| chrUn | 30374104 | 30374635 | 532 SAT1_CF  | blue | na |
| chrUn | 30374703 | 30375057 | 355 SAT1_CF  | blue | na |



|       |          |          |      |         |      |    |
|-------|----------|----------|------|---------|------|----|
| chrUn | 30375103 | 30375651 | 549  | SAT1_CF | blue | na |
| chrUn | 30375729 | 30376510 | 782  | SAT1_CF | blue | na |
| chrUn | 30376560 | 30377179 | 620  | SAT1_CF | blue | na |
| chrUn | 30377202 | 30377307 | 106  | SAT1_CF | blue | na |
| chrUn | 30377320 | 30377821 | 502  | SAT1_CF | blue | na |
| chrUn | 30377861 | 30378042 | 182  | SAT1_CF | blue | na |
| chrUn | 30378222 | 30379085 | 864  | SAT1_CF | blue | na |
| chrUn | 30379100 | 30380258 | 1159 | SAT1_CF | blue | na |
| chrUn | 30380271 | 30381033 | 763  | SAT1_CF | blue | na |
| chrUn | 30381046 | 30381528 | 483  | SAT1_CF | blue | na |
| chrUn | 30381588 | 30382486 | 899  | SAT1_CF | blue | na |
| chrUn | 30382553 | 30383518 | 966  | SAT1_CF | blue | na |
| chrUn | 30383561 | 30384994 | 1434 | SAT1_CF | blue | na |
| chrUn | 30385021 | 30385546 | 526  | SAT1_CF | blue | na |
| chrUn | 30385577 | 30386097 | 521  | SAT1_CF | blue | na |
| chrUn | 30386172 | 30386568 | 397  | SAT1_CF | blue | na |
| chrUn | 30386581 | 30388958 | 2378 | SAT1_CF | blue | na |
| chrUn | 30388970 | 30389449 | 480  | SAT1_CF | blue | na |
| chrUn | 30389471 | 30389577 | 107  | SAT1_CF | blue | na |
| chrUn | 30389590 | 30390294 | 705  | SAT1_CF | blue | na |
| chrUn | 30390309 | 30391502 | 1194 | SAT1_CF | blue | na |
| chrUn | 30391524 | 30391629 | 106  | SAT1_CF | blue | na |
| chrUn | 30391642 | 30392142 | 501  | SAT1_CF | blue | na |
| chrUn | 30392182 | 30392363 | 182  | SAT1_CF | blue | na |
| chrUn | 30392545 | 30393414 | 870  | SAT1_CF | blue | na |
| chrUn | 30393458 | 30395578 | 2121 | SAT1_CF | blue | na |
| chrUn | 30395620 | 30396484 | 865  | SAT1_CF | blue | na |
| chrUn | 30396496 | 30397126 | 631  | SAT1_CF | blue | na |
| chrUn | 30397183 | 30399101 | 1919 | SAT1_CF | blue | na |
| chrUn | 30399113 | 30399786 | 674  | SAT1_CF | blue | na |
| chrUn | 30399809 | 30400310 | 502  | SAT1_CF | blue | na |
| chrUn | 30400376 | 30400512 | 137  | SAT1_CF | blue | na |
| chrUn | 30400540 | 30401087 | 548  | SAT1_CF | blue | na |
| chrUn | 30401171 | 30401731 | 561  | SAT1_CF | blue | na |
| chrUn | 30401759 | 30402390 | 632  | SAT1_CF | blue | na |
| chrUn | 30402433 | 30403106 | 674  | SAT1_CF | blue | na |
| chrUn | 30403119 | 30403620 | 502  | SAT1_CF | blue | na |
| chrUn | 30403660 | 30404060 | 401  | SAT1_CF | blue | na |
| chrUn | 30404071 | 30404618 | 548  | SAT1_CF | blue | na |
| chrUn | 30404698 | 30405469 | 772  | SAT1_CF | blue | na |
| chrUn | 30405522 | 30406382 | 861  | SAT1_CF | blue | na |
| chrUn | 30406394 | 30407153 | 760  | SAT1_CF | blue | na |

|       |          |          |              |      |    |
|-------|----------|----------|--------------|------|----|
| chrUn | 30407166 | 30407666 | 501 SAT1_CF  | blue | na |
| chrUn | 30407706 | 30408814 | 1109 SAT1_CF | blue | na |
| chrUn | 30408825 | 30409327 | 503 SAT1_CF  | blue | na |
| chrUn | 30409380 | 30410818 | 1439 SAT1_CF | blue | na |
| chrUn | 30410862 | 30411388 | 527 SAT1_CF  | blue | na |
| chrUn | 30411419 | 30412041 | 623 SAT1_CF  | blue | na |
| chrUn | 30412054 | 30412982 | 929 SAT1_CF  | blue | na |
| chrUn | 30412994 | 30413677 | 684 SAT1_CF  | blue | na |
| chrUn | 30413689 | 30414318 | 630 SAT1_CF  | blue | na |
| chrUn | 30414341 | 30414446 | 106 SAT1_CF  | blue | na |
| chrUn | 30414459 | 30416156 | 1698 SAT1_CF | blue | na |
| chrUn | 30416169 | 30416279 | 111 SAT1_CF  | blue | na |
| chrUn | 30416297 | 30416814 | 518 SAT1_CF  | blue | na |
| chrUn | 30416831 | 30417015 | 185 SAT1_CF  | blue | na |
| chrUn | 30417196 | 30417398 | 203 SAT1_CF  | blue | na |
| chrUn | 30417441 | 30418050 | 610 SAT1_CF  | blue | na |
| chrUn | 30418070 | 30419228 | 1159 SAT1_CF | blue | na |
| chrUn | 30419240 | 30419872 | 633 SAT1_CF  | blue | na |
| chrUn | 30419943 | 30420485 | 543 SAT1_CF  | blue | na |
| chrUn | 30420503 | 30420816 | 314 SAT1_CF  | blue | na |
| chrUn | 30420896 | 30421459 | 564 SAT1_CF  | blue | na |
| chrUn | 30421486 | 30422866 | 1381 SAT1_CF | blue | na |
| chrUn | 30422878 | 30423436 | 559 SAT1_CF  | blue | na |
| chrUn | 30423458 | 30423585 | 128 SAT1_CF  | blue | na |
| chrUn | 30423634 | 30424309 | 676 SAT1_CF  | blue | na |
| chrUn | 30424321 | 30424861 | 541 SAT1_CF  | blue | na |
| chrUn | 30424886 | 30424984 | 99 SAT1_CF   | blue | na |
| chrUn | 30425114 | 30425660 | 547 SAT1_CF  | blue | na |
| chrUn | 30425737 | 30426597 | 861 SAT1_CF  | blue | na |
| chrUn | 30426609 | 30427128 | 520 SAT1_CF  | blue | na |
| chrUn | 30427145 | 30427191 | 47 SAT1_CF   | blue | na |
| chrUn | 30427235 | 30427981 | 747 SAT1_CF  | blue | na |
| chrUn | 30428008 | 30428509 | 502 SAT1_CF  | blue | na |
| chrUn | 30428596 | 30429484 | 889 SAT1_CF  | blue | na |
| chrUn | 30429502 | 30429784 | 283 SAT1_CF  | blue | na |
| chrUn | 30429827 | 30430370 | 544 SAT1_CF  | blue | na |
| chrUn | 30430412 | 30430959 | 548 SAT1_CF  | blue | na |
| chrUn | 30431016 | 30431535 | 520 SAT1_CF  | blue | na |
| chrUn | 30431607 | 30431971 | 365 SAT1_CF  | blue | na |
| chrUn | 30432020 | 30433098 | 1079 SAT1_CF | blue | na |
| chrUn | 30433120 | 30433646 | 527 SAT1_CF  | blue | na |
| chrUn | 30433689 | 30434355 | 667 SAT1_CF  | blue | na |

|       |          |          |              |      |    |
|-------|----------|----------|--------------|------|----|
| chrUn | 30434378 | 30434910 | 533 SAT1_CF  | blue | na |
| chrUn | 30434921 | 30435633 | 713 SAT1_CF  | blue | na |
| chrUn | 30435645 | 30436687 | 1043 SAT1_CF | blue | na |
| chrUn | 30436876 | 30437708 | 833 SAT1_CF  | blue | na |
| chrUn | 30437751 | 30438297 | 547 SAT1_CF  | blue | na |
| chrUn | 30438318 | 30438427 | 110 SAT1_CF  | blue | na |
| chrUn | 30438439 | 30438761 | 323 SAT1_CF  | blue | na |
| chrUn | 30438840 | 30439558 | 719 SAT1_CF  | blue | na |
| chrUn | 30439570 | 30440330 | 761 SAT1_CF  | blue | na |
| chrUn | 30440344 | 30440844 | 501 SAT1_CF  | blue | na |
| chrUn | 30440884 | 30441584 | 701 SAT1_CF  | blue | na |
| chrUn | 30441664 | 30442227 | 564 SAT1_CF  | blue | na |
| chrUn | 30442254 | 30442886 | 633 SAT1_CF  | blue | na |
| chrUn | 30442929 | 30443605 | 677 SAT1_CF  | blue | na |
| chrUn | 30443617 | 30444284 | 668 SAT1_CF  | blue | na |
| chrUn | 30444311 | 30445013 | 703 SAT1_CF  | blue | na |
| chrUn | 30445078 | 30445627 | 550 SAT1_CF  | blue | na |
| chrUn | 30445706 | 30446282 | 577 SAT1_CF  | blue | na |
| chrUn | 30446305 | 30447187 | 883 SAT1_CF  | blue | na |
| chrUn | 30447199 | 30447880 | 682 SAT1_CF  | blue | na |
| chrUn | 30447893 | 30448394 | 502 SAT1_CF  | blue | na |
| chrUn | 30448434 | 30448835 | 402 SAT1_CF  | blue | na |
| chrUn | 30448846 | 30449390 | 545 SAT1_CF  | blue | na |
| chrUn | 30449415 | 30449592 | 178 SAT1_CF  | blue | na |
| chrUn | 30449619 | 30450453 | 835 SAT1_CF  | blue | na |
| chrUn | 30450484 | 30451004 | 521 SAT1_CF  | blue | na |
| chrUn | 30451120 | 30451475 | 356 SAT1_CF  | blue | na |
| chrUn | 30451488 | 30452456 | 969 SAT1_CF  | blue | na |
| chrUn | 30452499 | 30453865 | 1367 SAT1_CF | blue | na |
| chrUn | 30453877 | 30454346 | 470 SAT1_CF  | blue | na |
| chrUn | 30454368 | 30454474 | 107 SAT1_CF  | blue | na |
| chrUn | 30454487 | 30454987 | 501 SAT1_CF  | blue | na |
| chrUn | 30455032 | 30455189 | 158 SAT1_CF  | blue | na |
| chrUn | 30455222 | 30455729 | 508 SAT1_CF  | blue | na |
| chrUn | 30455777 | 30456445 | 669 SAT1_CF  | blue | na |
| chrUn | 30456468 | 30457171 | 704 SAT1_CF  | blue | na |
| chrUn | 30457199 | 30457745 | 547 SAT1_CF  | blue | na |
| chrUn | 30457829 | 30458389 | 561 SAT1_CF  | blue | na |
| chrUn | 30458435 | 30460244 | 1810 SAT1_CF | blue | na |
| chrUn | 30460255 | 30460935 | 681 SAT1_CF  | blue | na |
| chrUn | 30460947 | 30461629 | 683 SAT1_CF  | blue | na |
| chrUn | 30461642 | 30462496 | 855 SAT1_CF  | blue | na |

|       |          |          |              |      |    |
|-------|----------|----------|--------------|------|----|
| chrUn | 30462508 | 30463203 | 696 SAT1_CF  | blue | na |
| chrUn | 30463214 | 30463928 | 715 SAT1_CF  | blue | na |
| chrUn | 30463947 | 30464930 | 984 SAT1_CF  | blue | na |
| chrUn | 30464973 | 30465638 | 666 SAT1_CF  | blue | na |
| chrUn | 30465660 | 30466867 | 1208 SAT1_CF | blue | na |
| chrUn | 30466883 | 30468754 | 1872 SAT1_CF | blue | na |
| chrUn | 30468765 | 30469381 | 617 SAT1_CF  | blue | na |
| chrUn | 30469396 | 30471144 | 1749 SAT1_CF | blue | na |
| chrUn | 30471166 | 30471668 | 503 SAT1_CF  | blue | na |
| chrUn | 30471734 | 30471870 | 137 SAT1_CF  | blue | na |
| chrUn | 30471898 | 30473089 | 1192 SAT1_CF | blue | na |
| chrUn | 30473114 | 30473746 | 633 SAT1_CF  | blue | na |
| chrUn | 30473789 | 30474454 | 666 SAT1_CF  | blue | na |
| chrUn | 30474477 | 30475159 | 683 SAT1_CF  | blue | na |
| chrUn | 30475179 | 30475673 | 495 SAT1_CF  | blue | na |
| chrUn | 30475760 | 30476277 | 518 SAT1_CF  | blue | na |
| chrUn | 30620736 | 30621276 | 541 SAT1_CF  | blue | na |
| chrUn | 30621289 | 30621790 | 502 SAT1_CF  | blue | na |
| chrUn | 30621806 | 30622564 | 759 SAT1_CF  | blue | na |
| chrUn | 30622576 | 30623412 | 837 SAT1_CF  | blue | na |
| chrUn | 30623593 | 30623801 | 209 SAT1_CF  | blue | na |
| chrUn | 30623814 | 30625183 | 1370 SAT1_CF | blue | na |
| chrUn | 30625196 | 30625867 | 672 SAT1_CF  | blue | na |
| chrUn | 30625912 | 30626544 | 633 SAT1_CF  | blue | na |
| chrUn | 30626572 | 30627805 | 1234 SAT1_CF | blue | na |
| chrUn | 30627817 | 30629083 | 1267 SAT1_CF | blue | na |
| chrUn | 30629113 | 30629632 | 520 SAT1_CF  | blue | na |
| chrUn | 30629646 | 30630336 | 691 SAT1_CF  | blue | na |
| chrUn | 30630348 | 30630456 | 109 SAT1_CF  | blue | na |
| chrUn | 30630476 | 30632774 | 2299 SAT1_CF | blue | na |
| chrUn | 30632786 | 30633103 | 318 SAT1_CF  | blue | na |
| chrUn | 30633176 | 30633746 | 571 SAT1_CF  | blue | na |
| chrUn | 30633765 | 30635054 | 1290 SAT1_CF | blue | na |
| chrUn | 30635097 | 30635726 | 630 SAT1_CF  | blue | na |
| chrUn | 30635754 | 30636947 | 1194 SAT1_CF | blue | na |
| chrUn | 30636975 | 30637132 | 158 SAT1_CF  | blue | na |
| chrUn | 30637177 | 30637679 | 503 SAT1_CF  | blue | na |
| chrUn | 30637701 | 30638333 | 633 SAT1_CF  | blue | na |
| chrUn | 30638346 | 30638848 | 503 SAT1_CF  | blue | na |
| chrUn | 30638890 | 30640338 | 1449 SAT1_CF | blue | na |
| chrUn | 30640349 | 30642219 | 1871 SAT1_CF | blue | na |
| chrUn | 30642235 | 30643441 | 1207 SAT1_CF | blue | na |

|       |          |          |              |      |    |
|-------|----------|----------|--------------|------|----|
| chrUn | 30643463 | 30644128 | 666 SAT1_CF  | blue | na |
| chrUn | 30644171 | 30646667 | 2497 SAT1_CF | blue | na |
| chrUn | 30646679 | 30647533 | 855 SAT1_CF  | blue | na |
| chrUn | 30647546 | 30648892 | 1347 SAT1_CF | blue | na |
| chrUn | 30648989 | 30649971 | 983 SAT1_CF  | blue | na |
| chrUn | 30650018 | 30650546 | 529 SAT1_CF  | blue | na |
| chrUn | 30650559 | 30650665 | 107 SAT1_CF  | blue | na |
| chrUn | 30650688 | 30651262 | 575 SAT1_CF  | blue | na |
| chrUn | 30651274 | 30652036 | 763 SAT1_CF  | blue | na |
| chrUn | 30652050 | 30652699 | 650 SAT1_CF  | blue | na |
| chrUn | 30652710 | 30652785 | 76 SAT1_CF   | blue | na |
| chrUn | 30652806 | 30653358 | 553 SAT1_CF  | blue | na |
| chrUn | 30653370 | 30656126 | 2757 SAT1_CF | blue | na |
| chrUn | 30656166 | 30656665 | 500 SAT1_CF  | blue | na |
| chrUn | 30656679 | 30657362 | 684 SAT1_CF  | blue | na |
| chrUn | 30657374 | 30658048 | 675 SAT1_CF  | blue | na |
| chrUn | 30658092 | 30660697 | 2606 SAT1_CF | blue | na |
| chrUn | 30660740 | 30660905 | 166 SAT1_CF  | blue | na |
| chrUn | 30661088 | 30661273 | 186 SAT1_CF  | blue | na |
| chrUn | 30661290 | 30661810 | 521 SAT1_CF  | blue | na |
| chrUn | 30661823 | 30661931 | 109 SAT1_CF  | blue | na |
| chrUn | 30661951 | 30662510 | 560 SAT1_CF  | blue | na |
| chrUn | 30662522 | 30663197 | 676 SAT1_CF  | blue | na |
| chrUn | 30663241 | 30664205 | 965 SAT1_CF  | blue | na |
| chrUn | 30664321 | 30664717 | 397 SAT1_CF  | blue | na |
| chrUn | 30664785 | 30665305 | 521 SAT1_CF  | blue | na |
| chrUn | 30665318 | 30665389 | 72 SAT1_CF   | blue | na |
| chrUn | 30665446 | 30666000 | 555 SAT1_CF  | blue | na |
| chrUn | 30666012 | 30666772 | 761 SAT1_CF  | blue | na |
| chrUn | 30666786 | 30667459 | 674 SAT1_CF  | blue | na |
| chrUn | 30667502 | 30669130 | 1629 SAT1_CF | blue | na |
| chrUn | 30669211 | 30669376 | 166 SAT1_CF  | blue | na |
| chrUn | 30669558 | 30669990 | 433 SAT1_CF  | blue | na |
| chrUn | 30670032 | 30670849 | 818 SAT1_CF  | blue | na |
| chrUn | 30670930 | 30671479 | 550 SAT1_CF  | blue | na |
| chrUn | 30671493 | 30672324 | 832 SAT1_CF  | blue | na |
| chrUn | 30672337 | 30672444 | 108 SAT1_CF  | blue | na |
| chrUn | 30672466 | 30673040 | 575 SAT1_CF  | blue | na |
| chrUn | 30673052 | 30675238 | 2187 SAT1_CF | blue | na |
| chrUn | 30675259 | 30675772 | 514 SAT1_CF  | blue | na |
| chrUn | 30675792 | 30676474 | 683 SAT1_CF  | blue | na |
| chrUn | 30676486 | 30678491 | 2006 SAT1_CF | blue | na |

|       |          |          |              |      |    |
|-------|----------|----------|--------------|------|----|
| chrUn | 30678556 | 30679211 | 656 SAT1_CF  | blue | na |
| chrUn | 30679222 | 30679762 | 541 SAT1_CF  | blue | na |
| chrUn | 30679776 | 30680458 | 683 SAT1_CF  | blue | na |
| chrUn | 30680470 | 30681150 | 681 SAT1_CF  | blue | na |
| chrUn | 30681167 | 30681762 | 596 SAT1_CF  | blue | na |
| chrUn | 30681774 | 30683380 | 1607 SAT1_CF | blue | na |
| chrUn | 30683406 | 30684152 | 747 SAT1_CF  | blue | na |
| chrUn | 30684164 | 30685498 | 1335 SAT1_CF | blue | na |
| chrUn | 30685568 | 30686103 | 536 SAT1_CF  | blue | na |
| chrUn | 30686185 | 30686708 | 524 SAT1_CF  | blue | na |
| chrUn | 30686723 | 30686859 | 137 SAT1_CF  | blue | na |
| chrUn | 30686925 | 30688768 | 1844 SAT1_CF | blue | na |
| chrUn | 30688814 | 30689120 | 307 SAT1_CF  | blue | na |
| chrUn | 30689199 | 30690299 | 1101 SAT1_CF | blue | na |
| chrUn | 30690360 | 30691544 | 1185 SAT1_CF | blue | na |
| chrUn | 30691601 | 30692233 | 633 SAT1_CF  | blue | na |
| chrUn | 30692245 | 30692848 | 604 SAT1_CF  | blue | na |
| chrUn | 30692861 | 30692967 | 107 SAT1_CF  | blue | na |
| chrUn | 30692988 | 30693540 | 553 SAT1_CF  | blue | na |
| chrUn | 30693552 | 30694417 | 866 SAT1_CF  | blue | na |
| chrUn | 30694459 | 30695979 | 1521 SAT1_CF | blue | na |
| chrUn | 30695996 | 30696603 | 608 SAT1_CF  | blue | na |
| chrUn | 30696625 | 30697319 | 695 SAT1_CF  | blue | na |
| chrUn | 30697360 | 30699157 | 1798 SAT1_CF | blue | na |
| chrUn | 30699170 | 30699930 | 761 SAT1_CF  | blue | na |
| chrUn | 30699948 | 30701599 | 1652 SAT1_CF | blue | na |
| chrUn | 30701611 | 30702977 | 1367 SAT1_CF | blue | na |
| chrUn | 30703042 | 30703604 | 563 SAT1_CF  | blue | na |
| chrUn | 30703647 | 30704200 | 554 SAT1_CF  | blue | na |
| chrUn | 30704211 | 30704821 | 611 SAT1_CF  | blue | na |
| chrUn | 30704844 | 30705510 | 667 SAT1_CF  | blue | na |
| chrUn | 30705553 | 30706079 | 527 SAT1_CF  | blue | na |
| chrUn | 30706100 | 30706185 | 86 SAT1_CF   | blue | na |
| chrUn | 30706212 | 30706776 | 565 SAT1_CF  | blue | na |
| chrUn | 30706834 | 30707355 | 522 SAT1_CF  | blue | na |
| chrUn | 30707366 | 30707909 | 544 SAT1_CF  | blue | na |
| chrUn | 30707920 | 30708238 | 319 SAT1_CF  | blue | na |
| chrUn | 30708291 | 30708792 | 502 SAT1_CF  | blue | na |
| chrUn | 30708805 | 30708906 | 102 SAT1_CF  | blue | na |
| chrUn | 30708934 | 30709644 | 711 SAT1_CF  | blue | na |
| chrUn | 30709656 | 30710337 | 682 SAT1_CF  | blue | na |
| chrUn | 30710380 | 30710919 | 540 SAT1_CF  | blue | na |

|       |          |          |              |      |    |
|-------|----------|----------|--------------|------|----|
| chrUn | 30710969 | 30711513 | 545 SAT1_CF  | blue | na |
| chrUn | 30711551 | 30711898 | 348 SAT1_CF  | blue | na |
| chrUn | 30711940 | 30712607 | 668 SAT1_CF  | blue | na |
| chrUn | 30712673 | 30713751 | 1079 SAT1_CF | blue | na |
| chrUn | 30713766 | 30713923 | 158 SAT1_CF  | blue | na |
| chrUn | 30713968 | 30715188 | 1221 SAT1_CF | blue | na |
| chrUn | 30715220 | 30715723 | 504 SAT1_CF  | blue | na |
| chrUn | 30715755 | 30715891 | 137 SAT1_CF  | blue | na |
| chrUn | 30715957 | 30716455 | 499 SAT1_CF  | blue | na |
| chrUn | 30716473 | 30716584 | 112 SAT1_CF  | blue | na |
| chrUn | 30716597 | 30717151 | 555 SAT1_CF  | blue | na |
| chrUn | 30717163 | 30717840 | 678 SAT1_CF  | blue | na |
| chrUn | 30717937 | 30718478 | 542 SAT1_CF  | blue | na |
| chrUn | 30718503 | 30719380 | 878 SAT1_CF  | blue | na |
| chrUn | 30719393 | 30720506 | 1114 SAT1_CF | blue | na |
| chrUn | 30720527 | 30721051 | 525 SAT1_CF  | blue | na |
| chrUn | 30721096 | 30721459 | 364 SAT1_CF  | blue | na |
| chrUn | 30721531 | 30722050 | 520 SAT1_CF  | blue | na |
| chrUn | 30722107 | 30722654 | 548 SAT1_CF  | blue | na |
| chrUn | 30722696 | 30724354 | 1659 SAT1_CF | blue | na |
| chrUn | 30724535 | 30725373 | 839 SAT1_CF  | blue | na |
| chrUn | 30725399 | 30726687 | 1289 SAT1_CF | blue | na |
| chrUn | 30726699 | 30726838 | 140 SAT1_CF  | blue | na |
| chrUn | 30726883 | 30727382 | 500 SAT1_CF  | blue | na |
| chrUn | 30727395 | 30728619 | 1225 SAT1_CF | blue | na |
| chrUn | 30728665 | 30728794 | 130 SAT1_CF  | blue | na |
| chrUn | 30728816 | 30729374 | 559 SAT1_CF  | blue | na |
| chrUn | 30729386 | 30730864 | 1479 SAT1_CF | blue | na |
| chrUn | 30730881 | 30731434 | 554 SAT1_CF  | blue | na |
| chrUn | 30731446 | 30732374 | 929 SAT1_CF  | blue | na |
| chrUn | 30732387 | 30733033 | 647 SAT1_CF  | blue | na |
| chrUn | 30733045 | 30734545 | 1501 SAT1_CF | blue | na |
| chrUn | 30734631 | 30735126 | 496 SAT1_CF  | blue | na |
| chrUn | 30735146 | 30736761 | 1616 SAT1_CF | blue | na |
| chrUn | 30736777 | 30736855 | 79 SAT1_CF   | blue | na |
| chrUn | 30736868 | 30737803 | 936 SAT1_CF  | blue | na |
| chrUn | 30737863 | 30738343 | 481 SAT1_CF  | blue | na |
| chrUn | 30738370 | 30739803 | 1434 SAT1_CF | blue | na |
| chrUn | 30739846 | 30741882 | 2037 SAT1_CF | blue | na |
| chrUn | 30741942 | 30742424 | 483 SAT1_CF  | blue | na |
| chrUn | 30742437 | 30743112 | 676 SAT1_CF  | blue | na |
| chrUn | 30743127 | 30744790 | 1664 SAT1_CF | blue | na |

|       |          |          |              |        |    |
|-------|----------|----------|--------------|--------|----|
| chrUn | 30744802 | 30746261 | 1460 SAT1_CF | blue   | na |
| chrUn | 30746292 | 30746798 | 507 SAT1_CF  | blue   | na |
| chrUn | 30746887 | 30749012 | 2126 SAT1_CF | blue   | na |
| chrUn | 30749030 | 30749835 | 806 SAT1_CF  | blue   | na |
| chrUn | 30749865 | 30751985 | 2121 SAT1_CF | blue   | na |
| chrUn | 30752165 | 30752389 | 225 SAT1_CF  | blue   | na |
| chrUn | 30752401 | 30753077 | 677 SAT1_CF  | blue   | na |
| chrUn | 30753120 | 30754121 | 1002 SAT1_CF | blue   | na |
| chrUn | 30754153 | 30755083 | 931 SAT1_CF  | blue   | na |
| chrUn | 30755146 | 30755619 | 474 SAT1_CF  | blue   | na |
| chrUn | 30755639 | 30756049 | 411 SAT1_CF  | blue   | na |
| chrUn | 30756241 | 30757321 | 1081 SAT1_CF | blue   | na |
| chrUn | 30757373 | 30757893 | 521 SAT1_CF  | blue   | na |
| chrUn | 30757924 | 30758117 | 194 SAT1_CF  | blue   | na |
| chrUn | 30758145 | 30758884 | 740 SAT1_CF  | blue   | na |
| chrUn | 30790907 | 30792110 | 1204 Sat2CF  | purple | na |
| chrUn | 30791384 | 30792195 | 812 Sat2CF   | purple | na |
| chrUn | 30809147 | 30810396 | 1250 Sat2CF  | purple | na |
| chrUn | 30856924 | 30858082 | 1159 Sat2CF  | purple | na |
| chrUn | 30876352 | 30877530 | 1179 Sat2CF  | purple | na |
| chrUn | 30876482 | 30877501 | 1020 Sat2CF  | purple | na |
| chrUn | 30877372 | 30877573 | 202 Sat2CF   | purple | na |
| chrUn | 30886439 | 30886770 | 332 Sat2CF   | purple | na |
| chrUn | 30886480 | 30886995 | 516 Sat2CF   | purple | na |
| chrUn | 30886866 | 30887043 | 178 Sat2CF   | purple | na |
| chrUn | 30923008 | 30923676 | 669 Sat2CF   | purple | na |
| chrUn | 30923079 | 30923935 | 857 Sat2CF   | purple | na |
| chrUn | 30923839 | 30923946 | 108 Sat2CF   | purple | na |
| chrUn | 30941822 | 30942558 | 737 Sat2CF   | purple | na |
| chrUn | 30941824 | 30942484 | 661 Sat2CF   | purple | na |
| chrUn | 30964966 | 30965918 | 953 Sat2CF   | purple | na |
| chrUn | 30965046 | 30965783 | 738 Sat2CF   | purple | na |
| chrUn | 30984111 | 30984288 | 178 Sat2CF   | purple | na |
| chrUn | 30984159 | 30985448 | 1290 Sat2CF  | purple | na |
| chrUn | 31041162 | 31041331 | 170 SAT1_CF  | blue   | na |
| chrUn | 31058639 | 31060120 | 1482 CarSat1 | red    | na |
| chrUn | 31060150 | 31060997 | 848 CarSat1  | red    | na |
| chrUn | 31061018 | 31062610 | 1593 CarSat1 | red    | na |
| chrUn | 31065218 | 31065395 | 178 Sat2CF   | purple | na |
| chrUn | 31065237 | 31066415 | 1179 Sat2CF  | purple | na |
| chrUn | 31065266 | 31066285 | 1020 Sat2CF  | purple | na |
| chrUn | 31078533 | 31078883 | 351 Sat2CF   | purple | na |



|       |          |          |              |        |    |
|-------|----------|----------|--------------|--------|----|
| chrUn | 31078570 | 31079419 | 850 Sat2CF   | purple | na |
| chrUn | 31094301 | 31094478 | 178 Sat2CF   | purple | na |
| chrUn | 31094349 | 31094888 | 540 Sat2CF   | purple | na |
| chrUn | 31094784 | 31094900 | 117 Sat2CF   | purple | na |
| chrUn | 31104092 | 31104828 | 737 Sat2CF   | purple | na |
| chrUn | 31104167 | 31105298 | 1132 Sat2CF  | purple | na |
| chrUn | 31123443 | 31124558 | 1116 Sat2CF  | purple | na |
| chrUn | 31137521 | 31138676 | 1156 Sat2CF  | purple | na |
| chrUn | 31161756 | 31162458 | 703 CarSat1  | red    | na |
| chrUn | 31162480 | 31163336 | 857 CarSat1  | red    | na |
| chrUn | 31163357 | 31164135 | 779 CarSat1  | red    | na |
| chrUn | 31164153 | 31164592 | 440 CarSat1  | red    | na |
| chrUn | 31164599 | 31165607 | 1009 SAT1_CF | blue   | na |
| chrUn | 31165602 | 31166326 | 725 CarSat1  | red    | na |
| chrUn | 31166358 | 31166784 | 427 CarSat1  | red    | na |
| chrUn | 31168134 | 31168628 | 495 SAT1_CF  | blue   | na |
| chrUn | 31168648 | 31170012 | 1365 SAT1_CF | blue   | na |
| chrUn | 31170058 | 31170576 | 519 SAT1_CF  | blue   | na |
| chrUn | 31170615 | 31170760 | 146 SAT1_CF  | blue   | na |
| chrUn | 31170820 | 31171369 | 550 SAT1_CF  | blue   | na |
| chrUn | 31171412 | 31171782 | 371 SAT1_CF  | blue   | na |
| chrUn | 31171838 | 31173705 | 1868 SAT1_CF | blue   | na |
| chrUn | 31173750 | 31174970 | 1221 SAT1_CF | blue   | na |
| chrUn | 31175051 | 31175575 | 525 SAT1_CF  | blue   | na |
| chrUn | 31175590 | 31175747 | 158 SAT1_CF  | blue   | na |
| chrUn | 31175773 | 31176948 | 1176 SAT1_CF | blue   | na |
| chrUn | 31176961 | 31177792 | 832 SAT1_CF  | blue   | na |
| chrUn | 31177835 | 31178345 | 511 SAT1_CF  | blue   | na |
| chrUn | 31178373 | 31178509 | 137 SAT1_CF  | blue   | na |
| chrUn | 31178575 | 31179076 | 502 SAT1_CF  | blue   | na |
| chrUn | 31179088 | 31179763 | 676 SAT1_CF  | blue   | na |
| chrUn | 31179805 | 31180972 | 1168 SAT1_CF | blue   | na |
| chrUn | 31181042 | 31181515 | 474 SAT1_CF  | blue   | na |
| chrUn | 31181528 | 31182123 | 596 SAT1_CF  | blue   | na |
| chrUn | 31182157 | 31183950 | 1794 SAT1_CF | blue   | na |
| chrUn | 31183994 | 31184954 | 961 SAT1_CF  | blue   | na |
| chrUn | 31185014 | 31185943 | 930 SAT1_CF  | blue   | na |
| chrUn | 31185956 | 31186628 | 673 SAT1_CF  | blue   | na |
| chrUn | 31186640 | 31186807 | 168 SAT1_CF  | blue   | na |
| chrUn | 31186820 | 31187401 | 582 SAT1_CF  | blue   | na |
| chrUn | 31187445 | 31187971 | 527 SAT1_CF  | blue   | na |
| chrUn | 31188014 | 31188568 | 555 SAT1_CF  | blue   | na |

|       |          |          |              |      |    |
|-------|----------|----------|--------------|------|----|
| chrUn | 31188580 | 31189350 | 771 SAT1_CF  | blue | na |
| chrUn | 31189370 | 31189855 | 486 SAT1_CF  | blue | na |
| chrUn | 31189893 | 31190393 | 501 SAT1_CF  | blue | na |
| chrUn | 31190405 | 31191090 | 686 SAT1_CF  | blue | na |
| chrUn | 31191102 | 31191209 | 108 SAT1_CF  | blue | na |
| chrUn | 31191229 | 31192738 | 1510 SAT1_CF | blue | na |
| chrUn | 31192798 | 31193280 | 483 SAT1_CF  | blue | na |
| chrUn | 31193307 | 31194876 | 1570 SAT1_CF | blue | na |
| chrUn | 31194955 | 31195869 | 915 SAT1_CF  | blue | na |
| chrUn | 31195956 | 31196456 | 501 SAT1_CF  | blue | na |
| chrUn | 31196469 | 31198648 | 2180 SAT1_CF | blue | na |
| chrUn | 31198691 | 31199197 | 507 SAT1_CF  | blue | na |
| chrUn | 31199230 | 31199366 | 137 SAT1_CF  | blue | na |
| chrUn | 31199413 | 31200972 | 1560 SAT1_CF | blue | na |
| chrUn | 31201021 | 31201615 | 595 SAT1_CF  | blue | na |
| chrUn | 31203200 | 31203773 | 574 SAT1_CF  | blue | na |
| chrUn | 31203813 | 31204307 | 495 SAT1_CF  | blue | na |
| chrUn | 31204327 | 31204433 | 107 SAT1_CF  | blue | na |
| chrUn | 31204456 | 31206276 | 1821 SAT1_CF | blue | na |
| chrUn | 31206320 | 31207512 | 1193 SAT1_CF | blue | na |
| chrUn | 31207540 | 31207676 | 137 SAT1_CF  | blue | na |
| chrUn | 31207723 | 31208244 | 522 SAT1_CF  | blue | na |
| chrUn | 31208266 | 31209156 | 891 SAT1_CF  | blue | na |
| chrUn | 31209233 | 31209777 | 545 SAT1_CF  | blue | na |
| chrUn | 31209819 | 31210644 | 826 SAT1_CF  | blue | na |
| chrUn | 31210655 | 31211147 | 493 SAT1_CF  | blue | na |
| chrUn | 31211161 | 31213515 | 2355 SAT1_CF | blue | na |
| chrUn | 31213643 | 31213791 | 149 SAT1_CF  | blue | na |
| chrUn | 31213805 | 31215397 | 1593 SAT1_CF | blue | na |
| chrUn | 31215409 | 31216263 | 855 SAT1_CF  | blue | na |
| chrUn | 31216295 | 31216817 | 523 SAT1_CF  | blue | na |
| chrUn | 31216907 | 31217124 | 218 SAT1_CF  | blue | na |
| chrUn | 31217135 | 31217913 | 779 SAT1_CF  | blue | na |
| chrUn | 31217944 | 31218472 | 529 SAT1_CF  | blue | na |
| chrUn | 31218485 | 31218591 | 107 SAT1_CF  | blue | na |
| chrUn | 31218614 | 31219188 | 575 SAT1_CF  | blue | na |
| chrUn | 31219200 | 31219962 | 763 SAT1_CF  | blue | na |
| chrUn | 31219976 | 31220621 | 646 SAT1_CF  | blue | na |
| chrUn | 31220633 | 31221964 | 1332 SAT1_CF | blue | na |
| chrUn | 31222008 | 31222978 | 971 SAT1_CF  | blue | na |
| chrUn | 31223020 | 31223185 | 166 SAT1_CF  | blue | na |
| chrUn | 31223367 | 31223552 | 186 SAT1_CF  | blue | na |

|       |          |          |              |      |    |
|-------|----------|----------|--------------|------|----|
| chrUn | 31223569 | 31224089 | 521 SAT1_CF  | blue | na |
| chrUn | 31224102 | 31224210 | 109 SAT1_CF  | blue | na |
| chrUn | 31224230 | 31225661 | 1432 SAT1_CF | blue | na |
| chrUn | 31225703 | 31226246 | 544 SAT1_CF  | blue | na |
| chrUn | 31226283 | 31227544 | 1262 SAT1_CF | blue | na |
| chrUn | 31227597 | 31228098 | 502 SAT1_CF  | blue | na |
| chrUn | 31228125 | 31228869 | 745 SAT1_CF  | blue | na |
| chrUn | 31228881 | 31229555 | 675 SAT1_CF  | blue | na |
| chrUn | 31229598 | 31230089 | 492 SAT1_CF  | blue | na |
| chrUn | 31230169 | 31231126 | 958 SAT1_CF  | blue | na |
| chrUn | 31231166 | 31232348 | 1183 SAT1_CF | blue | na |
| chrUn | 31232362 | 31233007 | 646 SAT1_CF  | blue | na |
| chrUn | 31233021 | 31233652 | 632 SAT1_CF  | blue | na |
| chrUn | 31233695 | 31234240 | 546 SAT1_CF  | blue | na |
| chrUn | 31234268 | 31234404 | 137 SAT1_CF  | blue | na |
| chrUn | 31234470 | 31234971 | 502 SAT1_CF  | blue | na |
| chrUn | 31234997 | 31235661 | 665 SAT1_CF  | blue | na |
| chrUn | 31235709 | 31236234 | 526 SAT1_CF  | blue | na |
| chrUn | 31236298 | 31236844 | 547 SAT1_CF  | blue | na |
| chrUn | 31236857 | 31236963 | 107 SAT1_CF  | blue | na |
| chrUn | 31236986 | 31237560 | 575 SAT1_CF  | blue | na |
| chrUn | 31237572 | 31238256 | 685 SAT1_CF  | blue | na |
| chrUn | 31238269 | 31238914 | 646 SAT1_CF  | blue | na |
| chrUn | 31238926 | 31240256 | 1331 SAT1_CF | blue | na |
| chrUn | 31240300 | 31241681 | 1382 SAT1_CF | blue | na |
| chrUn | 31241721 | 31242222 | 502 SAT1_CF  | blue | na |
| chrUn | 31242236 | 31244265 | 2030 SAT1_CF | blue | na |
| chrUn | 31244284 | 31244954 | 671 SAT1_CF  | blue | na |
| chrUn | 31244997 | 31247094 | 2098 SAT1_CF | blue | na |
| chrUn | 31247174 | 31247680 | 507 SAT1_CF  | blue | na |
| chrUn | 31247693 | 31248097 | 405 SAT1_CF  | blue | na |
| chrUn | 31248135 | 31248637 | 503 SAT1_CF  | blue | na |
| chrUn | 31248650 | 31248756 | 107 SAT1_CF  | blue | na |
| chrUn | 31248779 | 31249378 | 600 SAT1_CF  | blue | na |
| chrUn | 31249421 | 31249627 | 207 SAT1_CF  | blue | na |
| chrUn | 31249642 | 31250166 | 525 SAT1_CF  | blue | na |
| chrUn | 31250181 | 31250317 | 137 SAT1_CF  | blue | na |
| chrUn | 31250402 | 31252697 | 2296 SAT1_CF | blue | na |
| chrUn | 31252709 | 31253023 | 315 SAT1_CF  | blue | na |
| chrUn | 31253105 | 31253624 | 520 SAT1_CF  | blue | na |
| chrUn | 31253680 | 31254227 | 548 SAT1_CF  | blue | na |
| chrUn | 31254269 | 31254807 | 539 SAT1_CF  | blue | na |

|       |          |          |              |      |    |
|-------|----------|----------|--------------|------|----|
| chrUn | 31254819 | 31255246 | 428 SAT1_CF  | blue | na |
| chrUn | 31255333 | 31255833 | 501 SAT1_CF  | blue | na |
| chrUn | 31255850 | 31256437 | 588 SAT1_CF  | blue | na |
| chrUn | 31256449 | 31257091 | 643 SAT1_CF  | blue | na |
| chrUn | 31257288 | 31257533 | 246 SAT1_CF  | blue | na |
| chrUn | 31257575 | 31259271 | 1697 SAT1_CF | blue | na |
| chrUn | 31259453 | 31259636 | 184 SAT1_CF  | blue | na |
| chrUn | 31259657 | 31261342 | 1686 SAT1_CF | blue | na |
| chrUn | 31261357 | 31262059 | 703 SAT1_CF  | blue | na |
| chrUn | 31262072 | 31263297 | 1226 SAT1_CF | blue | na |
| chrUn | 31263346 | 31263438 | 93 SAT1_CF   | blue | na |
| chrUn | 31263495 | 31264053 | 559 SAT1_CF  | blue | na |
| chrUn | 31264065 | 31265781 | 1717 SAT1_CF | blue | na |
| chrUn | 31265807 | 31266441 | 635 SAT1_CF  | blue | na |
| chrUn | 31266454 | 31266809 | 356 SAT1_CF  | blue | na |
| chrUn | 31266926 | 31267396 | 471 SAT1_CF  | blue | na |
| chrUn | 31267475 | 31268547 | 1073 SAT1_CF | blue | na |
| chrUn | 31268561 | 31269487 | 927 SAT1_CF  | blue | na |
| chrUn | 31269536 | 31270158 | 623 SAT1_CF  | blue | na |
| chrUn | 31270180 | 31270808 | 629 SAT1_CF  | blue | na |
| chrUn | 31270858 | 31271394 | 537 SAT1_CF  | blue | na |
| chrUn | 31271443 | 31272047 | 605 SAT1_CF  | blue | na |
| chrUn | 31272077 | 31272590 | 514 SAT1_CF  | blue | na |
| chrUn | 31272603 | 31273963 | 1361 SAT1_CF | blue | na |
| chrUn | 31273978 | 31274679 | 702 SAT1_CF  | blue | na |
| chrUn | 31274691 | 31275376 | 686 SAT1_CF  | blue | na |
| chrUn | 31275389 | 31276063 | 675 SAT1_CF  | blue | na |
| chrUn | 31276107 | 31278040 | 1934 SAT1_CF | blue | na |
| chrUn | 31278661 | 31279148 | 488 SAT1_CF  | blue | na |
| chrUn | 31279208 | 31279682 | 475 SAT1_CF  | blue | na |
| chrUn | 31279703 | 31280393 | 691 SAT1_CF  | blue | na |
| chrUn | 31280405 | 31280521 | 117 SAT1_CF  | blue | na |
| chrUn | 31280534 | 31281079 | 546 SAT1_CF  | blue | na |
| chrUn | 31281123 | 31283165 | 2043 SAT1_CF | blue | na |
| chrUn | 31283220 | 31283698 | 479 SAT1_CF  | blue | na |
| chrUn | 31283711 | 31283816 | 106 SAT1_CF  | blue | na |
| chrUn | 31283839 | 31285014 | 1176 SAT1_CF | blue | na |
| chrUn | 31285047 | 31285748 | 702 SAT1_CF  | blue | na |
| chrUn | 31285761 | 31286830 | 1070 SAT1_CF | blue | na |
| chrUn | 31286842 | 31287403 | 562 SAT1_CF  | blue | na |
| chrUn | 31287417 | 31288098 | 682 SAT1_CF  | blue | na |
| chrUn | 31288111 | 31289381 | 1271 SAT1_CF | blue | na |

|       |          |          |              |        |    |
|-------|----------|----------|--------------|--------|----|
| chrUn | 31289395 | 31290701 | 1307 SAT1_CF | blue   | na |
| chrUn | 31290713 | 31291515 | 803 SAT1_CF  | blue   | na |
| chrUn | 31291545 | 31292714 | 1170 SAT1_CF | blue   | na |
| chrUn | 31292725 | 31293975 | 1251 SAT1_CF | blue   | na |
| chrUn | 31409066 | 31409998 | 933 Carsat2  | orange | na |
| chrUn | 31410084 | 31411191 | 1108 Carsat2 | orange | na |
| chrUn | 31423423 | 31423714 | 292 SAT1_CF  | blue   | na |
| chrUn | 31423774 | 31424451 | 678 SAT1_CF  | blue   | na |
| chrUn | 31424463 | 31425017 | 555 SAT1_CF  | blue   | na |
| chrUn | 31425040 | 31425146 | 107 SAT1_CF  | blue   | na |
| chrUn | 31425159 | 31425680 | 522 SAT1_CF  | blue   | na |
| chrUn | 31425747 | 31426658 | 912 SAT1_CF  | blue   | na |
| chrUn | 31426773 | 31427735 | 963 SAT1_CF  | blue   | na |
| chrUn | 31427779 | 31429226 | 1448 SAT1_CF | blue   | na |
| chrUn | 31429249 | 31429279 | 31 SAT1_CF   | blue   | na |
| chrUn | 31433887 | 31435232 | 1346 SAT1_CF | blue   | na |
| chrUn | 31435287 | 31435961 | 675 SAT1_CF  | blue   | na |
| chrUn | 31435974 | 31437299 | 1326 SAT1_CF | blue   | na |
| chrUn | 31437322 | 31437427 | 106 SAT1_CF  | blue   | na |
| chrUn | 31437440 | 31438121 | 682 SAT1_CF  | blue   | na |
| chrUn | 31438134 | 31438654 | 521 SAT1_CF  | blue   | na |
| chrUn | 31438722 | 31441216 | 2495 SAT1_CF | blue   | na |
| chrUn | 31441229 | 31441749 | 521 SAT1_CF  | blue   | na |
| chrUn | 31441775 | 31441931 | 157 SAT1_CF  | blue   | na |
| chrUn | 31441983 | 31444301 | 2319 SAT1_CF | blue   | na |
| chrUn | 31444323 | 31444897 | 575 SAT1_CF  | blue   | na |
| chrUn | 31444960 | 31445026 | 67 SAT1_CF   | blue   | na |
| chrUn | 31445039 | 31445583 | 545 SAT1_CF  | blue   | na |
| chrUn | 31445667 | 31446174 | 508 SAT1_CF  | blue   | na |
| chrUn | 31446217 | 31446875 | 659 SAT1_CF  | blue   | na |
| chrUn | 31446887 | 31447427 | 541 SAT1_CF  | blue   | na |
| chrUn | 31447471 | 31448261 | 791 SAT1_CF  | blue   | na |
| chrUn | 31448304 | 31449164 | 861 SAT1_CF  | blue   | na |
| chrUn | 31449176 | 31449690 | 515 SAT1_CF  | blue   | na |
| chrUn | 31449713 | 31450548 | 836 SAT1_CF  | blue   | na |
| chrUn | 31450575 | 31451076 | 502 SAT1_CF  | blue   | na |
| chrUn | 31451163 | 31452898 | 1736 SAT1_CF | blue   | na |
| chrUn | 31452983 | 31453499 | 517 SAT1_CF  | blue   | na |
| chrUn | 31453514 | 31453706 | 193 SAT1_CF  | blue   | na |
| chrUn | 31453720 | 31455285 | 1566 SAT1_CF | blue   | na |
| chrUn | 31455297 | 31455966 | 670 SAT1_CF  | blue   | na |
| chrUn | 31455991 | 31456493 | 503 SAT1_CF  | blue   | na |

|       |          |          |              |      |    |
|-------|----------|----------|--------------|------|----|
| chrUn | 31456546 | 31457081 | 536 SAT1_CF  | blue | na |
| chrUn | 31457096 | 31457763 | 668 SAT1_CF  | blue | na |
| chrUn | 31457775 | 31458390 | 616 SAT1_CF  | blue | na |
| chrUn | 31458407 | 31459805 | 1399 SAT1_CF | blue | na |
| chrUn | 31459819 | 31460320 | 502 SAT1_CF  | blue | na |
| chrUn | 31460365 | 31461023 | 659 SAT1_CF  | blue | na |
| chrUn | 31461055 | 31462294 | 1240 SAT1_CF | blue | na |
| chrUn | 31462320 | 31462807 | 488 SAT1_CF  | blue | na |
| chrUn | 31462839 | 31463496 | 658 SAT1_CF  | blue | na |
| chrUn | 31463562 | 31464229 | 668 SAT1_CF  | blue | na |
| chrUn | 31464271 | 31465199 | 929 SAT1_CF  | blue | na |
| chrUn | 31465249 | 31466512 | 1264 SAT1_CF | blue | na |
| chrUn | 31466524 | 31467285 | 762 SAT1_CF  | blue | na |
| chrUn | 31467298 | 31467799 | 502 SAT1_CF  | blue | na |
| chrUn | 31467839 | 31468238 | 400 SAT1_CF  | blue | na |
| chrUn | 31468249 | 31468955 | 707 SAT1_CF  | blue | na |
| chrUn | 31469040 | 31469693 | 654 SAT1_CF  | blue | na |
| chrUn | 31469705 | 31470255 | 551 SAT1_CF  | blue | na |
| chrUn | 31470269 | 31470401 | 133 SAT1_CF  | blue | na |
| chrUn | 31470414 | 31471299 | 886 SAT1_CF  | blue | na |
| chrUn | 31471313 | 31471461 | 149 SAT1_CF  | blue | na |
| chrUn | 31471589 | 31472130 | 542 SAT1_CF  | blue | na |
| chrUn | 31472173 | 31472819 | 647 SAT1_CF  | blue | na |
| chrUn | 31472832 | 31473333 | 502 SAT1_CF  | blue | na |
| chrUn | 31473374 | 31474868 | 1495 SAT1_CF | blue | na |
| chrUn | 31474890 | 31475416 | 527 SAT1_CF  | blue | na |
| chrUn | 31475459 | 31476125 | 667 SAT1_CF  | blue | na |
| chrUn | 31476148 | 31477272 | 1125 SAT1_CF | blue | na |
| chrUn | 31477359 | 31477713 | 355 SAT1_CF  | blue | na |
| chrUn | 31477724 | 31478269 | 546 SAT1_CF  | blue | na |
| chrUn | 31478347 | 31478672 | 326 SAT1_CF  | blue | na |
| chrUn | 31478697 | 31480021 | 1325 SAT1_CF | blue | na |
| chrUn | 31480044 | 31481168 | 1125 SAT1_CF | blue | na |
| chrUn | 31481255 | 31481582 | 328 SAT1_CF  | blue | na |
| chrUn | 31481620 | 31482165 | 546 SAT1_CF  | blue | na |
| chrUn | 31482243 | 31482568 | 326 SAT1_CF  | blue | na |
| chrUn | 31482593 | 31483920 | 1328 SAT1_CF | blue | na |
| chrUn | 31483932 | 31484614 | 683 SAT1_CF  | blue | na |
| chrUn | 31484627 | 31485109 | 483 SAT1_CF  | blue | na |
| chrUn | 31485194 | 31485330 | 137 SAT1_CF  | blue | na |
| chrUn | 31485345 | 31485870 | 526 SAT1_CF  | blue | na |
| chrUn | 31485913 | 31486473 | 561 SAT1_CF  | blue | na |

|       |          |          |              |      |    |
|-------|----------|----------|--------------|------|----|
| chrUn | 31486517 | 31487059 | 543 SAT1_CF  | blue | na |
| chrUn | 31487156 | 31488850 | 1695 SAT1_CF | blue | na |
| chrUn | 31488892 | 31490169 | 1278 SAT1_CF | blue | na |
| chrUn | 31490213 | 31490723 | 511 SAT1_CF  | blue | na |
| chrUn | 31490764 | 31492360 | 1597 SAT1_CF | blue | na |
| chrUn | 31492374 | 31493176 | 803 SAT1_CF  | blue | na |
| chrUn | 31493188 | 31493746 | 559 SAT1_CF  | blue | na |
| chrUn | 31493766 | 31493874 | 109 SAT1_CF  | blue | na |
| chrUn | 31493887 | 31494407 | 521 SAT1_CF  | blue | na |
| chrUn | 31494424 | 31494607 | 184 SAT1_CF  | blue | na |
| chrUn | 31494790 | 31494955 | 166 SAT1_CF  | blue | na |
| chrUn | 31494997 | 31496441 | 1445 SAT1_CF | blue | na |
| chrUn | 31496521 | 31497612 | 1092 SAT1_CF | blue | na |
| chrUn | 31497656 | 31498330 | 675 SAT1_CF  | blue | na |
| chrUn | 31498342 | 31499025 | 684 SAT1_CF  | blue | na |
| chrUn | 31499039 | 31499539 | 501 SAT1_CF  | blue | na |
| chrUn | 31499579 | 31500539 | 961 SAT1_CF  | blue | na |
| chrUn | 31500583 | 31500861 | 279 SAT1_CF  | blue | na |
| chrUn | 31500878 | 31502242 | 1365 SAT1_CF | blue | na |
| chrUn | 31502256 | 31502748 | 493 SAT1_CF  | blue | na |
| chrUn | 31502759 | 31505138 | 2380 SAT1_CF | blue | na |
| chrUn | 31505160 | 31505681 | 522 SAT1_CF  | blue | na |
| chrUn | 31505728 | 31505864 | 137 SAT1_CF  | blue | na |
| chrUn | 31505879 | 31507084 | 1206 SAT1_CF | blue | na |
| chrUn | 31507112 | 31507741 | 630 SAT1_CF  | blue | na |
| chrUn | 31507784 | 31508450 | 667 SAT1_CF  | blue | na |
| chrUn | 31508473 | 31509155 | 683 SAT1_CF  | blue | na |
| chrUn | 31509175 | 31509334 | 160 SAT1_CF  | blue | na |
| chrUn | 31509558 | 31510269 | 712 SAT1_CF  | blue | na |
| chrUn | 31511667 | 31514025 | 2359 SAT1_CF | blue | na |
| chrUn | 31514038 | 31514539 | 502 SAT1_CF  | blue | na |
| chrUn | 31514626 | 31515540 | 915 SAT1_CF  | blue | na |
| chrUn | 31515619 | 31517108 | 1490 SAT1_CF | blue | na |
| chrUn | 31517127 | 31517697 | 571 SAT1_CF  | blue | na |
| chrUn | 31517757 | 31518157 | 401 SAT1_CF  | blue | na |
| chrUn | 31518205 | 31518751 | 547 SAT1_CF  | blue | na |
| chrUn | 31518831 | 31520517 | 1687 SAT1_CF | blue | na |
| chrUn | 31520541 | 31521093 | 553 SAT1_CF  | blue | na |
| chrUn | 31521114 | 31521222 | 109 SAT1_CF  | blue | na |
| chrUn | 31521235 | 31521755 | 521 SAT1_CF  | blue | na |
| chrUn | 31521774 | 31522888 | 1115 SAT1_CF | blue | na |
| chrUn | 31522936 | 31523610 | 675 SAT1_CF  | blue | na |

|       |          |          |              |      |    |
|-------|----------|----------|--------------|------|----|
| chrUn | 31523623 | 31524374 | 752 SAT1_CF  | blue | na |
| chrUn | 31524396 | 31524976 | 581 SAT1_CF  | blue | na |
| chrUn | 31525059 | 31525567 | 509 SAT1_CF  | blue | na |
| chrUn | 31525645 | 31525951 | 307 SAT1_CF  | blue | na |
| chrUn | 31525994 | 31527319 | 1326 SAT1_CF | blue | na |
| chrUn | 31527337 | 31529544 | 2208 SAT1_CF | blue | na |
| chrUn | 31529562 | 31530063 | 502 SAT1_CF  | blue | na |
| chrUn | 31530123 | 31530800 | 678 SAT1_CF  | blue | na |
| chrUn | 31530821 | 31530929 | 109 SAT1_CF  | blue | na |
| chrUn | 31530942 | 31531415 | 474 SAT1_CF  | blue | na |
| chrUn | 31531475 | 31531655 | 181 SAT1_CF  | blue | na |
| chrUn | 31531836 | 31533527 | 1692 SAT1_CF | blue | na |
| chrUn | 31533581 | 31534488 | 908 SAT1_CF  | blue | na |
| chrUn | 31534501 | 31535002 | 502 SAT1_CF  | blue | na |
| chrUn | 31535048 | 31536531 | 1484 SAT1_CF | blue | na |
| chrUn | 31536542 | 31537082 | 541 SAT1_CF  | blue | na |
| chrUn | 31537125 | 31537801 | 677 SAT1_CF  | blue | na |
| chrUn | 31537813 | 31538315 | 503 SAT1_CF  | blue | na |
| chrUn | 31538360 | 31538517 | 158 SAT1_CF  | blue | na |
| chrUn | 31538568 | 31539054 | 487 SAT1_CF  | blue | na |
| chrUn | 31539085 | 31539652 | 568 SAT1_CF  | blue | na |
| chrUn | 31539676 | 31540539 | 864 SAT1_CF  | blue | na |
| chrUn | 31540551 | 31541106 | 556 SAT1_CF  | blue | na |
| chrUn | 31541127 | 31541234 | 108 SAT1_CF  | blue | na |
| chrUn | 31541247 | 31541746 | 500 SAT1_CF  | blue | na |
| chrUn | 31541833 | 31544539 | 2707 SAT1_CF | blue | na |
| chrUn | 31544551 | 31545236 | 686 SAT1_CF  | blue | na |
| chrUn | 31545248 | 31546010 | 763 SAT1_CF  | blue | na |
| chrUn | 31546022 | 31547583 | 1562 SAT1_CF | blue | na |
| chrUn | 31547680 | 31548357 | 678 SAT1_CF  | blue | na |
| chrUn | 31548369 | 31549038 | 670 SAT1_CF  | blue | na |
| chrUn | 31549065 | 31549565 | 501 SAT1_CF  | blue | na |
| chrUn | 31549605 | 31550868 | 1264 SAT1_CF | blue | na |
| chrUn | 31550916 | 31551657 | 742 SAT1_CF  | blue | na |
| chrUn | 31686210 | 31686647 | 438 CarSat1  | red  | na |
| chrUn | 31686666 | 31687384 | 719 CarSat1  | red  | na |
| chrUn | 31687379 | 31688507 | 1129 SAT1_CF | blue | na |
| chrUn | 31688551 | 31690760 | 2210 SAT1_CF | blue | na |
| chrUn | 31690765 | 31690976 | 212 CarSat1  | red  | na |
| chrUn | 31691168 | 31692160 | 993 CarSat1  | red  | na |
| chrUn | 31692180 | 31692900 | 721 CarSat1  | red  | na |
| chrUn | 31692918 | 31694428 | 1511 CarSat1 | red  | na |



|       |          |          |      |         |        |    |
|-------|----------|----------|------|---------|--------|----|
| chrUn | 31694512 | 31695304 | 793  | CarSat1 | red    | na |
| chrUn | 31695325 | 31695849 | 525  | CarSat1 | red    | na |
| chrUn | 31696249 | 31697431 | 1183 | Sat2CF  | purple | na |
| chrUn | 31697323 | 31697502 | 180  | Sat2CF  | purple | na |
| chrUn | 31712002 | 31712876 | 875  | Sat2CF  | purple | na |
| chrUn | 31712078 | 31712801 | 724  | Sat2CF  | purple | na |
| chrUn | 31724923 | 31726173 | 1251 | Sat2CF  | purple | na |
| chrUn | 31725053 | 31726137 | 1085 | Sat2CF  | purple | na |
| chrUn | 31729000 | 31730592 | 1593 | CarSat1 | red    | na |
| chrUn | 31730613 | 31731452 | 840  | CarSat1 | red    | na |
| chrUn | 31731480 | 31733654 | 2175 | CarSat1 | red    | na |
| chrUn | 31819961 | 31820327 | 367  | CarSat1 | red    | na |
| chrUn | 31820322 | 31821340 | 1019 | SAT1_CF | blue   | na |
| chrUn | 31821368 | 31821994 | 627  | SAT1_CF | blue   | na |
| chrUn | 31822042 | 31822717 | 676  | SAT1_CF | blue   | na |
| chrUn | 31822729 | 31823333 | 605  | SAT1_CF | blue   | na |
| chrUn | 31823346 | 31823848 | 503  | SAT1_CF | blue   | na |
| chrUn | 31823884 | 31824069 | 186  | SAT1_CF | blue   | na |
| chrUn | 31824250 | 31825085 | 836  | SAT1_CF | blue   | na |
| chrUn | 31825097 | 31826313 | 1217 | SAT1_CF | blue   | na |
| chrUn | 31826339 | 31826496 | 158  | SAT1_CF | blue   | na |
| chrUn | 31826511 | 31827863 | 1353 | SAT1_CF | blue   | na |
| chrUn | 31827886 | 31827991 | 106  | SAT1_CF | blue   | na |
| chrUn | 31828004 | 31828484 | 481  | SAT1_CF | blue   | na |
| chrUn | 31828540 | 31828728 | 189  | SAT1_CF | blue   | na |
| chrUn | 31828908 | 31829110 | 203  | SAT1_CF | blue   | na |
| chrUn | 31829152 | 31831367 | 2216 | SAT1_CF | blue   | na |
| chrUn | 31831436 | 31832112 | 677  | SAT1_CF | blue   | na |
| chrUn | 31832124 | 31833320 | 1197 | SAT1_CF | blue   | na |
| chrUn | 31833408 | 31834291 | 884  | SAT1_CF | blue   | na |
| chrUn | 31834324 | 31835458 | 1135 | SAT1_CF | blue   | na |
| chrUn | 31835471 | 31835951 | 481  | SAT1_CF | blue   | na |
| chrUn | 31836010 | 31836412 | 403  | SAT1_CF | blue   | na |
| chrUn | 31836426 | 31836968 | 543  | SAT1_CF | blue   | na |
| chrUn | 31837012 | 31837967 | 956  | SAT1_CF | blue   | na |
| chrUn | 31838014 | 31838688 | 675  | SAT1_CF | blue   | na |
| chrUn | 31838700 | 31839380 | 681  | SAT1_CF | blue   | na |
| chrUn | 31839393 | 31840152 | 760  | SAT1_CF | blue   | na |
| chrUn | 31840165 | 31841795 | 1631 | SAT1_CF | blue   | na |
| chrUn | 31841839 | 31843130 | 1292 | SAT1_CF | blue   | na |
| chrUn | 31843143 | 31843520 | 378  | SAT1_CF | blue   | na |
| chrUn | 31843709 | 31844534 | 826  | SAT1_CF | blue   | na |

|       |          |          |              |      |    |
|-------|----------|----------|--------------|------|----|
| chrUn | 31844571 | 31845509 | 939 SAT1_CF  | blue | na |
| chrUn | 31845529 | 31846404 | 876 SAT1_CF  | blue | na |
| chrUn | 31846480 | 31847854 | 1375 SAT1_CF | blue | na |
| chrUn | 31847881 | 31849084 | 1204 SAT1_CF | blue | na |
| chrUn | 31849128 | 31849433 | 306 SAT1_CF  | blue | na |
| chrUn | 31849477 | 31850023 | 547 SAT1_CF  | blue | na |
| chrUn | 31850046 | 31850137 | 92 SAT1_CF   | blue | na |
| chrUn | 31850164 | 31850704 | 541 SAT1_CF  | blue | na |
| chrUn | 31850752 | 31852656 | 1905 SAT1_CF | blue | na |
| chrUn | 31852669 | 31853066 | 398 SAT1_CF  | blue | na |
| chrUn | 31853108 | 31854176 | 1069 SAT1_CF | blue | na |
| chrUn | 31854202 | 31854734 | 533 SAT1_CF  | blue | na |
| chrUn | 31854777 | 31855451 | 675 SAT1_CF  | blue | na |
| chrUn | 31855463 | 31857096 | 1634 SAT1_CF | blue | na |
| chrUn | 31857109 | 31857225 | 117 SAT1_CF  | blue | na |
| chrUn | 31857237 | 31858032 | 796 SAT1_CF  | blue | na |
| chrUn | 31858048 | 31860018 | 1971 SAT1_CF | blue | na |
| chrUn | 31860040 | 31860564 | 525 SAT1_CF  | blue | na |
| chrUn | 31860608 | 31861427 | 820 SAT1_CF  | blue | na |
| chrUn | 31861445 | 31861938 | 494 SAT1_CF  | blue | na |
| chrUn | 31861982 | 31862177 | 196 SAT1_CF  | blue | na |
| chrUn | 31862192 | 31863836 | 1645 SAT1_CF | blue | na |
| chrUn | 31863906 | 31864764 | 859 SAT1_CF  | blue | na |
| chrUn | 31864776 | 31865357 | 582 SAT1_CF  | blue | na |
| chrUn | 31865437 | 31866906 | 1470 SAT1_CF | blue | na |
| chrUn | 31866918 | 31867535 | 618 SAT1_CF  | blue | na |
| chrUn | 31867605 | 31868198 | 594 SAT1_CF  | blue | na |
| chrUn | 31868217 | 31868808 | 592 SAT1_CF  | blue | na |
| chrUn | 31868858 | 31869549 | 692 SAT1_CF  | blue | na |
| chrUn | 31869591 | 31870444 | 854 SAT1_CF  | blue | na |
| chrUn | 31870456 | 31871626 | 1171 SAT1_CF | blue | na |
| chrUn | 31871700 | 31872321 | 622 SAT1_CF  | blue | na |
| chrUn | 31872344 | 31874631 | 2288 SAT1_CF | blue | na |
| chrUn | 31874665 | 31876298 | 1634 SAT1_CF | blue | na |
| chrUn | 31876321 | 31877554 | 1234 SAT1_CF | blue | na |
| chrUn | 31877582 | 31878208 | 627 SAT1_CF  | blue | na |
| chrUn | 31878256 | 31878800 | 545 SAT1_CF  | blue | na |
| chrUn | 31878820 | 31878928 | 109 SAT1_CF  | blue | na |
| chrUn | 31878940 | 31879495 | 556 SAT1_CF  | blue | na |
| chrUn | 31879518 | 31879626 | 109 SAT1_CF  | blue | na |
| chrUn | 31879638 | 31880158 | 521 SAT1_CF  | blue | na |
| chrUn | 31880205 | 31881010 | 806 SAT1_CF  | blue | na |

|       |          |          |              |      |    |
|-------|----------|----------|--------------|------|----|
| chrUn | 31881036 | 31882000 | 965 SAT1_CF  | blue | na |
| chrUn | 31882043 | 31882718 | 676 SAT1_CF  | blue | na |
| chrUn | 31882730 | 31883285 | 556 SAT1_CF  | blue | na |
| chrUn | 31883355 | 31883948 | 594 SAT1_CF  | blue | na |
| chrUn | 31883995 | 31884132 | 138 SAT1_CF  | blue | na |
| chrUn | 31884159 | 31886595 | 2437 SAT1_CF | blue | na |
| chrUn | 31886665 | 31887211 | 547 SAT1_CF  | blue | na |
| chrUn | 31887223 | 31887847 | 625 SAT1_CF  | blue | na |
| chrUn | 31887873 | 31889508 | 1636 SAT1_CF | blue | na |
| chrUn | 31889552 | 31890754 | 1203 SAT1_CF | blue | na |
| chrUn | 31890774 | 31890883 | 110 SAT1_CF  | blue | na |
| chrUn | 31890895 | 31891436 | 542 SAT1_CF  | blue | na |
| chrUn | 31891479 | 31891645 | 167 SAT1_CF  | blue | na |
| chrUn | 31891664 | 31892377 | 714 SAT1_CF  | blue | na |
| chrUn | 31892389 | 31892974 | 586 SAT1_CF  | blue | na |
| chrUn | 31893017 | 31893364 | 348 SAT1_CF  | blue | na |
| chrUn | 31893402 | 31893946 | 545 SAT1_CF  | blue | na |
| chrUn | 31893988 | 31895537 | 1550 SAT1_CF | blue | na |
| chrUn | 31895580 | 31896254 | 675 SAT1_CF  | blue | na |
| chrUn | 31896266 | 31896871 | 606 SAT1_CF  | blue | na |
| chrUn | 31896884 | 31898997 | 2114 SAT1_CF | blue | na |
| chrUn | 31899021 | 31899926 | 906 SAT1_CF  | blue | na |
| chrUn | 31899938 | 31901134 | 1197 SAT1_CF | blue | na |
| chrUn | 31901179 | 31902747 | 1569 SAT1_CF | blue | na |
| chrUn | 31902771 | 31903676 | 906 SAT1_CF  | blue | na |
| chrUn | 31903688 | 31904904 | 1217 SAT1_CF | blue | na |
| chrUn | 31904920 | 31905957 | 1038 SAT1_CF | blue | na |
| chrUn | 31906006 | 31910552 | 4547 SAT1_CF | blue | na |
| chrUn | 31910564 | 31911169 | 606 SAT1_CF  | blue | na |
| chrUn | 31911182 | 31911877 | 696 SAT1_CF  | blue | na |
| chrUn | 31911895 | 31912578 | 684 SAT1_CF  | blue | na |
| chrUn | 31912592 | 31913092 | 501 SAT1_CF  | blue | na |
| chrUn | 31913148 | 31913497 | 350 SAT1_CF  | blue | na |
| chrUn | 31913530 | 31914040 | 511 SAT1_CF  | blue | na |
| chrUn | 31914156 | 31914938 | 783 SAT1_CF  | blue | na |
| chrUn | 31914980 | 31915725 | 746 SAT1_CF  | blue | na |
| chrUn | 31915737 | 31917145 | 1409 SAT1_CF | blue | na |
| chrUn | 31917158 | 31918049 | 892 SAT1_CF  | blue | na |
| chrUn | 31918061 | 31919344 | 1284 SAT1_CF | blue | na |
| chrUn | 31919389 | 31919928 | 540 SAT1_CF  | blue | na |
| chrUn | 31919970 | 31920644 | 675 SAT1_CF  | blue | na |
| chrUn | 31920655 | 31921339 | 685 SAT1_CF  | blue | na |

|       |          |          |              |        |    |
|-------|----------|----------|--------------|--------|----|
| chrUn | 31921352 | 31921872 | 521 SAT1_CF  | blue   | na |
| chrUn | 31921893 | 31923884 | 1992 SAT1_CF | blue   | na |
| chrUn | 31923927 | 31924602 | 676 SAT1_CF  | blue   | na |
| chrUn | 31924614 | 31925453 | 840 SAT1_CF  | blue   | na |
| chrUn | 31925466 | 31925968 | 503 SAT1_CF  | blue   | na |
| chrUn | 31926004 | 31926191 | 188 SAT1_CF  | blue   | na |
| chrUn | 31926369 | 31927204 | 836 SAT1_CF  | blue   | na |
| chrUn | 31927216 | 31927899 | 684 SAT1_CF  | blue   | na |
| chrUn | 31927913 | 31928415 | 503 SAT1_CF  | blue   | na |
| chrUn | 31928455 | 31929936 | 1482 SAT1_CF | blue   | na |
| chrUn | 31929953 | 31930489 | 537 SAT1_CF  | blue   | na |
| chrUn | 31930539 | 31930785 | 247 SAT1_CF  | blue   | na |
| chrUn | 31930830 | 31931403 | 574 SAT1_CF  | blue   | na |
| chrUn | 31931465 | 31932760 | 1296 SAT1_CF | blue   | na |
| chrUn | 31932802 | 31934178 | 1377 SAT1_CF | blue   | na |
| chrUn | 31934189 | 31934690 | 502 SAT1_CF  | blue   | na |
| chrUn | 31934735 | 31934892 | 158 SAT1_CF  | blue   | na |
| chrUn | 31934943 | 31935431 | 489 SAT1_CF  | blue   | na |
| chrUn | 31935511 | 31936194 | 684 SAT1_CF  | blue   | na |
| chrUn | 31936207 | 31938019 | 1813 SAT1_CF | blue   | na |
| chrUn | 31938032 | 31938542 | 511 SAT1_CF  | blue   | na |
| chrUn | 31938556 | 31939592 | 1037 SAT1_CF | blue   | na |
| chrUn | 31992823 | 31993060 | 238 Sat7CF   | lime   | na |
| chrUn | 31992854 | 31993158 | 305 Sat7CF   | lime   | na |
| chrUn | 32056502 | 32057171 | 670 Sat7CF   | lime   | na |
| chrUn | 32096534 | 32097710 | 1177 Sat2CF  | purple | na |
| chrUn | 32119131 | 32119330 | 200 Sat2CF   | purple | na |
| chrUn | 32119170 | 32120347 | 1178 Sat2CF  | purple | na |
| chrUn | 32154239 | 32154975 | 737 Sat2CF   | purple | na |
| chrUn | 32154241 | 32154901 | 661 Sat2CF   | purple | na |
| chrUn | 32175666 | 32176619 | 954 Sat2CF   | purple | na |
| chrUn | 32175746 | 32176484 | 739 Sat2CF   | purple | na |
| chrUn | 32194626 | 32195803 | 1178 Sat2CF  | purple | na |
| chrUn | 32292423 | 32292822 | 400 Sat7CF   | lime   | na |
| chrUn | 32444289 | 32444918 | 630 SAT1_CF  | blue   | na |
| chrUn | 32445128 | 32445283 | 156 SAT1_CF  | blue   | na |
| chrUn | 32445309 | 32445821 | 513 SAT1_CF  | blue   | na |
| chrUn | 32445850 | 32446510 | 661 SAT1_CF  | blue   | na |
| chrUn | 32446556 | 32447934 | 1379 SAT1_CF | blue   | na |
| chrUn | 32448123 | 32448624 | 502 SAT1_CF  | blue   | na |
| chrUn | 32448642 | 32449398 | 757 SAT1_CF  | blue   | na |
| chrUn | 32449410 | 32450084 | 675 SAT1_CF  | blue   | na |

|       |          |          |              |      |    |
|-------|----------|----------|--------------|------|----|
| chrUn | 32450128 | 32452672 | 2545 SAT1_CF | blue | na |
| chrUn | 32453128 | 32453733 | 606 SAT1_CF  | blue | na |
| chrUn | 32453933 | 32455273 | 1341 SAT1_CF | blue | na |
| chrUn | 32455286 | 32456024 | 739 SAT1_CF  | blue | na |
| chrUn | 32456049 | 32457311 | 1263 SAT1_CF | blue | na |
| chrUn | 32457324 | 32458007 | 684 SAT1_CF  | blue | na |
| chrUn | 32458019 | 32458778 | 760 SAT1_CF  | blue | na |
| chrUn | 32458792 | 32460235 | 1444 SAT1_CF | blue | na |
| chrUn | 32460263 | 32460826 | 564 SAT1_CF  | blue | na |
| chrUn | 32460869 | 32461357 | 489 SAT1_CF  | blue | na |
| chrUn | 32461409 | 32461545 | 137 SAT1_CF  | blue | na |
| chrUn | 32461611 | 32462160 | 550 SAT1_CF  | blue | na |
| chrUn | 32462173 | 32462849 | 677 SAT1_CF  | blue | na |
| chrUn | 32462892 | 32463432 | 541 SAT1_CF  | blue | na |
| chrUn | 32463447 | 32464512 | 1066 SAT1_CF | blue | na |
| chrUn | 32464528 | 32464930 | 403 SAT1_CF  | blue | na |
| chrUn | 32464970 | 32465472 | 503 SAT1_CF  | blue | na |
| chrUn | 32465484 | 32465593 | 110 SAT1_CF  | blue | na |
| chrUn | 32465614 | 32466244 | 631 SAT1_CF  | blue | na |
| chrUn | 32466357 | 32466863 | 507 SAT1_CF  | blue | na |
| chrUn | 32466877 | 32467281 | 405 SAT1_CF  | blue | na |
| chrUn | 32467319 | 32467821 | 503 SAT1_CF  | blue | na |
| chrUn | 32467833 | 32467970 | 138 SAT1_CF  | blue | na |
| chrUn | 32468013 | 32468715 | 703 SAT1_CF  | blue | na |
| chrUn | 32468745 | 32469946 | 1202 SAT1_CF | blue | na |
| chrUn | 32469961 | 32471426 | 1466 SAT1_CF | blue | na |
| chrUn | 32471469 | 32472943 | 1475 SAT1_CF | blue | na |
| chrUn | 32473033 | 32473533 | 501 SAT1_CF  | blue | na |
| chrUn | 32473547 | 32474230 | 684 SAT1_CF  | blue | na |
| chrUn | 32474242 | 32477230 | 2989 SAT1_CF | blue | na |
| chrUn | 32477310 | 32477966 | 657 SAT1_CF  | blue | na |
| chrUn | 32478028 | 32478658 | 631 SAT1_CF  | blue | na |
| chrUn | 32478670 | 32479352 | 683 SAT1_CF  | blue | na |
| chrUn | 32479364 | 32479964 | 601 SAT1_CF  | blue | na |
| chrUn | 32479976 | 32482399 | 2424 SAT1_CF | blue | na |
| chrUn | 32482444 | 32483431 | 988 SAT1_CF  | blue | na |
| chrUn | 32483488 | 32484443 | 956 SAT1_CF  | blue | na |
| chrUn | 32484483 | 32484983 | 501 SAT1_CF  | blue | na |
| chrUn | 32485010 | 32485758 | 749 SAT1_CF  | blue | na |
| chrUn | 32485776 | 32486443 | 668 SAT1_CF  | blue | na |
| chrUn | 32486455 | 32487102 | 648 SAT1_CF  | blue | na |
| chrUn | 32487126 | 32487450 | 325 SAT1_CF  | blue | na |

|       |          |          |              |      |    |
|-------|----------|----------|--------------|------|----|
| chrUn | 32487551 | 32488071 | 521 SAT1_CF  | blue | na |
| chrUn | 32488115 | 32488486 | 372 SAT1_CF  | blue | na |
| chrUn | 32488522 | 32489023 | 502 SAT1_CF  | blue | na |
| chrUn | 32489041 | 32489144 | 104 SAT1_CF  | blue | na |
| chrUn | 32489165 | 32489739 | 575 SAT1_CF  | blue | na |
| chrUn | 32489751 | 32490411 | 661 SAT1_CF  | blue | na |
| chrUn | 32490459 | 32491439 | 981 SAT1_CF  | blue | na |
| chrUn | 32491460 | 32492494 | 1035 SAT1_CF | blue | na |
| chrUn | 32492514 | 32493034 | 521 SAT1_CF  | blue | na |
| chrUn | 32493047 | 32493719 | 673 SAT1_CF  | blue | na |
| chrUn | 32493768 | 32494269 | 502 SAT1_CF  | blue | na |
| chrUn | 32494282 | 32494966 | 685 SAT1_CF  | blue | na |
| chrUn | 32494978 | 32495831 | 854 SAT1_CF  | blue | na |
| chrUn | 32495873 | 32497601 | 1729 SAT1_CF | blue | na |
| chrUn | 32497614 | 32498259 | 646 SAT1_CF  | blue | na |
| chrUn | 32498303 | 32499440 | 1138 SAT1_CF | blue | na |
| chrUn | 32499506 | 32500007 | 502 SAT1_CF  | blue | na |
| chrUn | 32500019 | 32500127 | 109 SAT1_CF  | blue | na |
| chrUn | 32500150 | 32500705 | 556 SAT1_CF  | blue | na |
| chrUn | 32500717 | 32501395 | 679 SAT1_CF  | blue | na |
| chrUn | 32501440 | 32503069 | 1630 SAT1_CF | blue | na |
| chrUn | 32503100 | 32503481 | 382 SAT1_CF  | blue | na |
| chrUn | 32503522 | 32504023 | 502 SAT1_CF  | blue | na |
| chrUn | 32504036 | 32504710 | 675 SAT1_CF  | blue | na |
| chrUn | 32504753 | 32505383 | 631 SAT1_CF  | blue | na |
| chrUn | 32505411 | 32506610 | 1200 SAT1_CF | blue | na |
| chrUn | 32506667 | 32507727 | 1061 SAT1_CF | blue | na |
| chrUn | 32507795 | 32508299 | 505 SAT1_CF  | blue | na |
| chrUn | 32508333 | 32511045 | 2713 SAT1_CF | blue | na |
| chrUn | 32511126 | 32511685 | 560 SAT1_CF  | blue | na |
| chrUn | 32511696 | 32512310 | 615 SAT1_CF  | blue | na |
| chrUn | 32512322 | 32512997 | 676 SAT1_CF  | blue | na |
| chrUn | 32513040 | 32515077 | 2038 SAT1_CF | blue | na |
| chrUn | 32515117 | 32515696 | 580 SAT1_CF  | blue | na |
| chrUn | 32515759 | 32516433 | 675 SAT1_CF  | blue | na |
| chrUn | 32516456 | 32517000 | 545 SAT1_CF  | blue | na |
| chrUn | 32517043 | 32518866 | 1824 SAT1_CF | blue | na |
| chrUn | 32518885 | 32519398 | 514 SAT1_CF  | blue | na |
| chrUn | 32519420 | 32520100 | 681 SAT1_CF  | blue | na |
| chrUn | 32520112 | 32520221 | 110 SAT1_CF  | blue | na |
| chrUn | 32520241 | 32521041 | 801 SAT1_CF  | blue | na |
| chrUn | 32521053 | 32522384 | 1332 SAT1_CF | blue | na |

|       |          |          |              |      |    |
|-------|----------|----------|--------------|------|----|
| chrUn | 32522427 | 32523100 | 674 SAT1_CF  | blue | na |
| chrUn | 32523128 | 32525234 | 2107 SAT1_CF | blue | na |
| chrUn | 32525291 | 32525826 | 536 SAT1_CF  | blue | na |
| chrUn | 32525906 | 32526415 | 510 SAT1_CF  | blue | na |
| chrUn | 32526443 | 32526600 | 158 SAT1_CF  | blue | na |
| chrUn | 32526645 | 32527147 | 503 SAT1_CF  | blue | na |
| chrUn | 32527159 | 32527231 | 73 SAT1_CF   | blue | na |
| chrUn | 32527288 | 32528575 | 1288 SAT1_CF | blue | na |
| chrUn | 32528586 | 32528940 | 355 SAT1_CF  | blue | na |
| chrUn | 32529027 | 32529527 | 501 SAT1_CF  | blue | na |
| chrUn | 32529540 | 32529644 | 105 SAT1_CF  | blue | na |
| chrUn | 32529669 | 32531565 | 1897 SAT1_CF | blue | na |
| chrUn | 32531645 | 32532938 | 1294 SAT1_CF | blue | na |
| chrUn | 32533025 | 32533527 | 503 SAT1_CF  | blue | na |
| chrUn | 32533539 | 32533648 | 110 SAT1_CF  | blue | na |
| chrUn | 32533669 | 32534420 | 752 SAT1_CF  | blue | na |
| chrUn | 32534442 | 32534986 | 545 SAT1_CF  | blue | na |
| chrUn | 32535029 | 32537095 | 2067 SAT1_CF | blue | na |
| chrUn | 32537107 | 32537783 | 677 SAT1_CF  | blue | na |
| chrUn | 32537795 | 32539866 | 2072 SAT1_CF | blue | na |
| chrUn | 32539906 | 32540481 | 576 SAT1_CF  | blue | na |
| chrUn | 32540494 | 32540601 | 108 SAT1_CF  | blue | na |
| chrUn | 32540622 | 32541177 | 556 SAT1_CF  | blue | na |
| chrUn | 32541189 | 32541872 | 684 SAT1_CF  | blue | na |
| chrUn | 32541914 | 32542764 | 851 SAT1_CF  | blue | na |
| chrUn | 32542834 | 32544037 | 1204 SAT1_CF | blue | na |
| chrUn | 32544081 | 32544739 | 659 SAT1_CF  | blue | na |
| chrUn | 32544757 | 32545259 | 503 SAT1_CF  | blue | na |
| chrUn | 32545292 | 32546693 | 1402 SAT1_CF | blue | na |
| chrUn | 32546711 | 32547385 | 675 SAT1_CF  | blue | na |
| chrUn | 32547434 | 32549328 | 1895 SAT1_CF | blue | na |
| chrUn | 32549381 | 32549882 | 502 SAT1_CF  | blue | na |
| chrUn | 32549909 | 32550693 | 785 SAT1_CF  | blue | na |
| chrUn | 32550719 | 32551266 | 548 SAT1_CF  | blue | na |
| chrUn | 32551309 | 32552306 | 998 SAT1_CF  | blue | na |
| chrUn | 32552348 | 32553303 | 956 SAT1_CF  | blue | na |
| chrUn | 32553346 | 32554498 | 1153 SAT1_CF | blue | na |
| chrUn | 32554513 | 32555326 | 814 SAT1_CF  | blue | na |
| chrUn | 32555378 | 32556192 | 815 SAT1_CF  | blue | na |
| chrUn | 32557198 | 32558238 | 1041 CarSat1 | red  | na |
| chrUn | 32558272 | 32558980 | 709 CarSat1  | red  | na |
| chrUn | 32559004 | 32559940 | 937 CarSat1  | red  | na |

|       |          |          |      |         |        |    |
|-------|----------|----------|------|---------|--------|----|
| chrUn | 32559955 | 32560082 | 128  | Carsat2 | orange | na |
| chrUn | 32559970 | 32560678 | 709  | CarSat1 | red    | na |
| chrUn | 32560693 | 32560820 | 128  | Carsat2 | orange | na |
| chrUn | 32560708 | 32562151 | 1444 | CarSat1 | red    | na |
| chrUn | 32562166 | 32562292 | 127  | Carsat2 | orange | na |
| chrUn | 32562181 | 32564366 | 2186 | CarSat1 | red    | na |
| chrUn | 32564377 | 32564507 | 131  | Carsat2 | orange | na |
| chrUn | 32564396 | 32565823 | 1428 | CarSat1 | red    | na |
| chrUn | 32566965 | 32570321 | 3357 | CarSat1 | red    | na |
| chrUn | 32570345 | 32571285 | 941  | CarSat1 | red    | na |
| chrUn | 32571300 | 32571426 | 127  | Carsat2 | orange | na |
| chrUn | 32571315 | 32572021 | 707  | CarSat1 | red    | na |
| chrUn | 32572051 | 32572759 | 709  | CarSat1 | red    | na |
| chrUn | 32572774 | 32572900 | 127  | Carsat2 | orange | na |
| chrUn | 32572789 | 32574971 | 2183 | CarSat1 | red    | na |
| chrUn | 32574986 | 32575113 | 128  | Carsat2 | orange | na |
| chrUn | 32575001 | 32575709 | 709  | CarSat1 | red    | na |
| chrUn | 32575739 | 32577187 | 1449 | CarSat1 | red    | na |
| chrUn | 32577217 | 32577924 | 708  | CarSat1 | red    | na |
| chrUn | 32577953 | 32579365 | 1413 | CarSat1 | red    | na |
| chrUn | 32579798 | 32581615 | 1818 | CarSat1 | red    | na |
| chrUn | 32581630 | 32581756 | 127  | Carsat2 | orange | na |
| chrUn | 32581645 | 32583355 | 1711 | CarSat1 | red    | na |
| chrUn | 32583382 | 32584558 | 1177 | CarSat1 | red    | na |
| chrUn | 32584573 | 32584699 | 127  | Carsat2 | orange | na |
| chrUn | 32584588 | 32585806 | 1219 | CarSat1 | red    | na |
| chrUn | 32585830 | 32587511 | 1682 | CarSat1 | red    | na |
| chrUn | 32587526 | 32587653 | 128  | Carsat2 | orange | na |
| chrUn | 32587541 | 32588247 | 707  | CarSat1 | red    | na |
| chrUn | 32588277 | 32589498 | 1222 | CarSat1 | red    | na |
| chrUn | 32589522 | 32591712 | 2191 | CarSat1 | red    | na |
| chrUn | 32591736 | 32592453 | 718  | CarSat1 | red    | na |
| chrUn | 32592477 | 32593332 | 856  | CarSat1 | red    | na |
| chrUn | 32593780 | 32594892 | 1113 | CarSat1 | red    | na |
| chrUn | 32594922 | 32596368 | 1447 | CarSat1 | red    | na |
| chrUn | 32596398 | 32597105 | 708  | CarSat1 | red    | na |
| chrUn | 32597120 | 32597246 | 127  | Carsat2 | orange | na |
| chrUn | 32597135 | 32597840 | 706  | CarSat1 | red    | na |
| chrUn | 32597855 | 32597980 | 126  | Carsat2 | orange | na |
| chrUn | 32597870 | 32600048 | 2179 | CarSat1 | red    | na |
| chrUn | 32600078 | 32600784 | 707  | CarSat1 | red    | na |
| chrUn | 32600799 | 32600925 | 127  | Carsat2 | orange | na |



|       |          |          |      |         |        |    |
|-------|----------|----------|------|---------|--------|----|
| chrUn | 32600814 | 32602999 | 2186 | CarSat1 | red    | na |
| chrUn | 32603014 | 32603141 | 128  | Carsat2 | orange | na |
| chrUn | 32603029 | 32604477 | 1449 | CarSat1 | red    | na |
| chrUn | 32604492 | 32604619 | 128  | Carsat2 | orange | na |
| chrUn | 32604507 | 32605728 | 1222 | CarSat1 | red    | na |
| chrUn | 32605752 | 32606949 | 1198 | CarSat1 | red    | na |
| chrUn | 32606961 | 32607936 | 976  | CarSat1 | red    | na |
| chrUn | 32607960 | 32608857 | 898  | CarSat1 | red    | na |
| chrUn | 32610507 | 32613289 | 2783 | CarSat1 | red    | na |
| chrUn | 32613304 | 32613430 | 127  | Carsat2 | orange | na |
| chrUn | 32613319 | 32615496 | 2178 | CarSat1 | red    | na |
| chrUn | 32615511 | 32615637 | 127  | Carsat2 | orange | na |
| chrUn | 32615526 | 32617239 | 1714 | CarSat1 | red    | na |
| chrUn | 32617260 | 32618442 | 1183 | CarSat1 | red    | na |
| chrUn | 32618457 | 32618583 | 127  | Carsat2 | orange | na |
| chrUn | 32618472 | 32619179 | 708  | CarSat1 | red    | na |
| chrUn | 32619209 | 32620182 | 974  | CarSat1 | red    | na |
| chrUn | 32620193 | 32621390 | 1198 | CarSat1 | red    | na |
| chrUn | 32621420 | 32622864 | 1445 | CarSat1 | red    | na |
| chrUn | 32622879 | 32623006 | 128  | Carsat2 | orange | na |
| chrUn | 32622894 | 32623380 | 487  | CarSat1 | red    | na |
| chrUn | 32623404 | 32627797 | 4394 | CarSat1 | red    | na |
| chrUn | 32627809 | 32629484 | 1676 | CarSat1 | red    | na |
| chrUn | 32629500 | 32629627 | 128  | Carsat2 | orange | na |
| chrUn | 32629515 | 32631220 | 1706 | CarSat1 | red    | na |
| chrUn | 32631232 | 32632428 | 1197 | CarSat1 | red    | na |
| chrUn | 32632443 | 32632569 | 127  | Carsat2 | orange | na |
| chrUn | 32632458 | 32633017 | 560  | CarSat1 | red    | na |
| chrUn | 32635173 | 32636613 | 1441 | CarSat1 | red    | na |
| chrUn | 32636637 | 32638572 | 1936 | CarSat1 | red    | na |
| chrUn | 32638583 | 32639780 | 1198 | CarSat1 | red    | na |
| chrUn | 32639795 | 32639921 | 127  | Carsat2 | orange | na |
| chrUn | 32639810 | 32640517 | 708  | CarSat1 | red    | na |
| chrUn | 32640532 | 32640659 | 128  | Carsat2 | orange | na |
| chrUn | 32640547 | 32645451 | 4905 | CarSat1 | red    | na |
| chrUn | 32645475 | 32647415 | 1941 | CarSat1 | red    | na |
| chrUn | 32647442 | 32648396 | 955  | CarSat1 | red    | na |
| chrUn | 32648420 | 32649354 | 935  | CarSat1 | red    | na |
| chrUn | 32649384 | 32650092 | 709  | CarSat1 | red    | na |
| chrUn | 32650107 | 32650234 | 128  | Carsat2 | orange | na |
| chrUn | 32650122 | 32652086 | 1965 | CarSat1 | red    | na |
| chrUn | 32652102 | 32652816 | 715  | CarSat1 | red    | na |

|       |          |          |      |         |      |    |
|-------|----------|----------|------|---------|------|----|
| chrUn | 32652840 | 32655035 | 2196 | CarSat1 | red  | na |
| chrUn | 32655067 | 32656503 | 1437 | CarSat1 | red  | na |
| chrUn | 32656519 | 32660649 | 4131 | CarSat1 | red  | na |
| chrUn | 32660670 | 32661381 | 712  | CarSat1 | red  | na |
| chrUn | 32661402 | 32662834 | 1433 | CarSat1 | red  | na |
| chrUn | 32663015 | 32664020 | 1006 | CarSat1 | red  | na |
| chrUn | 32664047 | 32665225 | 1179 | CarSat1 | red  | na |
| chrUn | 32665407 | 32668221 | 2815 | CarSat1 | red  | na |
| chrUn | 32668411 | 32669041 | 631  | CarSat1 | red  | na |
| chrUn | 32669074 | 32669769 | 696  | CarSat1 | red  | na |
| chrUn | 32669794 | 32671724 | 1931 | CarSat1 | red  | na |
| chrUn | 32671751 | 32673364 | 1614 | CarSat1 | red  | na |
| chrUn | 32788268 | 32788542 | 275  | SAT1_CF | blue | na |
| chrUn | 32788563 | 32789105 | 543  | SAT1_CF | blue | na |
| chrUn | 32789175 | 32790376 | 1202 | SAT1_CF | blue | na |
| chrUn | 32790420 | 32790726 | 307  | SAT1_CF | blue | na |
| chrUn | 32790806 | 32791659 | 854  | SAT1_CF | blue | na |
| chrUn | 32791689 | 32792647 | 959  | SAT1_CF | blue | na |
| chrUn | 32792697 | 32793397 | 701  | SAT1_CF | blue | na |
| chrUn | 32793447 | 32794416 | 970  | SAT1_CF | blue | na |
| chrUn | 32794439 | 32795000 | 562  | SAT1_CF | blue | na |
| chrUn | 32795018 | 32796065 | 1048 | SAT1_CF | blue | na |
| chrUn | 32796086 | 32796628 | 543  | SAT1_CF | blue | na |
| chrUn | 32796698 | 32797899 | 1202 | SAT1_CF | blue | na |
| chrUn | 32797943 | 32798249 | 307  | SAT1_CF | blue | na |
| chrUn | 32798329 | 32799182 | 854  | SAT1_CF | blue | na |
| chrUn | 32799212 | 32799741 | 530  | SAT1_CF | blue | na |
| chrUn | 32800663 | 32801025 | 363  | SAT1_CF | blue | na |
| chrUn | 32801075 | 32802680 | 1606 | SAT1_CF | blue | na |
| chrUn | 32802706 | 32804528 | 1823 | SAT1_CF | blue | na |
| chrUn | 32804566 | 32805066 | 501  | SAT1_CF | blue | na |
| chrUn | 32805079 | 32806301 | 1223 | SAT1_CF | blue | na |
| chrUn | 32806343 | 32808070 | 1728 | SAT1_CF | blue | na |
| chrUn | 32808142 | 32808641 | 500  | SAT1_CF | blue | na |
| chrUn | 32808654 | 32809337 | 684  | SAT1_CF | blue | na |
| chrUn | 32809349 | 32809969 | 621  | SAT1_CF | blue | na |
| chrUn | 32810056 | 32811200 | 1145 | SAT1_CF | blue | na |
| chrUn | 32811240 | 32812437 | 1198 | SAT1_CF | blue | na |
| chrUn | 32812449 | 32813131 | 683  | SAT1_CF | blue | na |
| chrUn | 32813142 | 32813634 | 493  | SAT1_CF | blue | na |
| chrUn | 32813648 | 32814680 | 1033 | SAT1_CF | blue | na |
| chrUn | 32814745 | 32815292 | 548  | SAT1_CF | blue | na |

|       |          |          |              |      |    |
|-------|----------|----------|--------------|------|----|
| chrUn | 32816721 | 32817294 | 574 SAT1_CF  | blue | na |
| chrUn | 32817329 | 32817836 | 508 SAT1_CF  | blue | na |
| chrUn | 32817849 | 32819563 | 1715 SAT1_CF | blue | na |
| chrUn | 32819647 | 32820192 | 546 SAT1_CF  | blue | na |
| chrUn | 32820205 | 32820362 | 158 SAT1_CF  | blue | na |
| chrUn | 32820409 | 32820930 | 522 SAT1_CF  | blue | na |
| chrUn | 32820943 | 32822233 | 1291 SAT1_CF | blue | na |
| chrUn | 32822303 | 32822805 | 503 SAT1_CF  | blue | na |
| chrUn | 32822819 | 32823365 | 547 SAT1_CF  | blue | na |
| chrUn | 32823396 | 32824579 | 1184 SAT1_CF | blue | na |
| chrUn | 32824591 | 32826352 | 1762 SAT1_CF | blue | na |
| chrUn | 32826364 | 32827039 | 676 SAT1_CF  | blue | na |
| chrUn | 32827082 | 32828046 | 965 SAT1_CF  | blue | na |
| chrUn | 32828088 | 32829106 | 1019 SAT1_CF | blue | na |
| chrUn | 32829159 | 32829653 | 495 SAT1_CF  | blue | na |
| chrUn | 32829673 | 32830355 | 683 SAT1_CF  | blue | na |
| chrUn | 32830367 | 32831041 | 675 SAT1_CF  | blue | na |
| chrUn | 32831084 | 32831609 | 526 SAT1_CF  | blue | na |
| chrUn | 32831690 | 32832273 | 584 SAT1_CF  | blue | na |
| chrUn | 32832285 | 32832601 | 317 SAT1_CF  | blue | na |
| chrUn | 32832614 | 32833116 | 503 SAT1_CF  | blue | na |
| chrUn | 32833133 | 32833235 | 103 SAT1_CF  | blue | na |
| chrUn | 32833257 | 32834494 | 1238 SAT1_CF | blue | na |
| chrUn | 32834514 | 32835273 | 760 SAT1_CF  | blue | na |
| chrUn | 32835285 | 32836047 | 763 SAT1_CF  | blue | na |
| chrUn | 32836059 | 32837390 | 1332 SAT1_CF | blue | na |
| chrUn | 32837434 | 32838633 | 1200 SAT1_CF | blue | na |
| chrUn | 32838648 | 32838783 | 136 SAT1_CF  | blue | na |
| chrUn | 32838851 | 32839351 | 501 SAT1_CF  | blue | na |
| chrUn | 32839364 | 32840665 | 1302 SAT1_CF | blue | na |
| chrUn | 32840677 | 32841901 | 1225 SAT1_CF | blue | na |
| chrUn | 32841943 | 32843797 | 1855 SAT1_CF | blue | na |
| chrUn | 32843818 | 32845658 | 1841 SAT1_CF | blue | na |
| chrUn | 32845699 | 32846849 | 1151 SAT1_CF | blue | na |
| chrUn | 32846860 | 32847467 | 608 SAT1_CF  | blue | na |
| chrUn | 32847537 | 32848091 | 555 SAT1_CF  | blue | na |
| chrUn | 32848104 | 32849522 | 1419 SAT1_CF | blue | na |
| chrUn | 32849553 | 32850080 | 528 SAT1_CF  | blue | na |
| chrUn | 32850092 | 32851278 | 1187 SAT1_CF | blue | na |
| chrUn | 32851365 | 32851857 | 493 SAT1_CF  | blue | na |
| chrUn | 32851877 | 32851982 | 106 SAT1_CF  | blue | na |
| chrUn | 32852005 | 32856133 | 4129 SAT1_CF | blue | na |

|       |          |          |              |      |    |
|-------|----------|----------|--------------|------|----|
| chrUn | 32856145 | 32857947 | 1803 SAT1_CF | blue | na |
| chrUn | 32858027 | 32858192 | 166 SAT1_CF  | blue | na |
| chrUn | 32858372 | 32858556 | 185 SAT1_CF  | blue | na |
| chrUn | 32858592 | 32859091 | 500 SAT1_CF  | blue | na |
| chrUn | 32859105 | 32859211 | 107 SAT1_CF  | blue | na |
| chrUn | 32859234 | 32859753 | 520 SAT1_CF  | blue | na |
| chrUn | 32859765 | 32860616 | 852 SAT1_CF  | blue | na |
| chrUn | 32860701 | 32861448 | 748 SAT1_CF  | blue | na |
| chrUn | 32861514 | 32862026 | 513 SAT1_CF  | blue | na |
| chrUn | 32862051 | 32862152 | 102 SAT1_CF  | blue | na |
| chrUn | 32862173 | 32862727 | 555 SAT1_CF  | blue | na |
| chrUn | 32862739 | 32863647 | 909 SAT1_CF  | blue | na |
| chrUn | 32863677 | 32864224 | 548 SAT1_CF  | blue | na |
| chrUn | 32864236 | 32865570 | 1335 SAT1_CF | blue | na |
| chrUn | 32865583 | 32865689 | 107 SAT1_CF  | blue | na |
| chrUn | 32865712 | 32866263 | 552 SAT1_CF  | blue | na |
| chrUn | 32866275 | 32867570 | 1296 SAT1_CF | blue | na |
| chrUn | 32867583 | 32868085 | 503 SAT1_CF  | blue | na |
| chrUn | 32868098 | 32868860 | 763 SAT1_CF  | blue | na |
| chrUn | 32868872 | 32869549 | 678 SAT1_CF  | blue | na |
| chrUn | 32869618 | 32871200 | 1583 SAT1_CF | blue | na |
| chrUn | 32871213 | 32871401 | 189 SAT1_CF  | blue | na |
| chrUn | 32871453 | 32872153 | 701 SAT1_CF  | blue | na |
| chrUn | 32872165 | 32872271 | 107 SAT1_CF  | blue | na |
| chrUn | 32872294 | 32872922 | 629 SAT1_CF  | blue | na |
| chrUn | 32872958 | 32873804 | 847 SAT1_CF  | blue | na |
| chrUn | 32873822 | 32874508 | 687 SAT1_CF  | blue | na |
| chrUn | 32874520 | 32875369 | 850 SAT1_CF  | blue | na |
| chrUn | 32875453 | 32875997 | 545 SAT1_CF  | blue | na |
| chrUn | 32876040 | 32876396 | 357 SAT1_CF  | blue | na |
| chrUn | 32876412 | 32877300 | 889 SAT1_CF  | blue | na |
| chrUn | 32877417 | 32877933 | 517 SAT1_CF  | blue | na |
| chrUn | 32877991 | 32878537 | 547 SAT1_CF  | blue | na |
| chrUn | 32878580 | 32879236 | 657 SAT1_CF  | blue | na |
| chrUn | 32879255 | 32879810 | 556 SAT1_CF  | blue | na |
| chrUn | 32879839 | 32881513 | 1675 SAT1_CF | blue | na |
| chrUn | 32881558 | 32882632 | 1075 SAT1_CF | blue | na |
| chrUn | 32882677 | 32883185 | 509 SAT1_CF  | blue | na |
| chrUn | 32883198 | 32883386 | 189 SAT1_CF  | blue | na |
| chrUn | 32883438 | 32884138 | 701 SAT1_CF  | blue | na |
| chrUn | 32884150 | 32884256 | 107 SAT1_CF  | blue | na |
| chrUn | 32884279 | 32884907 | 629 SAT1_CF  | blue | na |

|       |          |          |              |        |    |
|-------|----------|----------|--------------|--------|----|
| chrUn | 32884943 | 32885789 | 847 SAT1_CF  | blue   | na |
| chrUn | 32885807 | 32886493 | 687 SAT1_CF  | blue   | na |
| chrUn | 32886505 | 32887354 | 850 SAT1_CF  | blue   | na |
| chrUn | 32887438 | 32887982 | 545 SAT1_CF  | blue   | na |
| chrUn | 32888025 | 32888381 | 357 SAT1_CF  | blue   | na |
| chrUn | 32888397 | 32889285 | 889 SAT1_CF  | blue   | na |
| chrUn | 32889402 | 32889918 | 517 SAT1_CF  | blue   | na |
| chrUn | 32889976 | 32890522 | 547 SAT1_CF  | blue   | na |
| chrUn | 32890565 | 32891221 | 657 SAT1_CF  | blue   | na |
| chrUn | 32891240 | 32891795 | 556 SAT1_CF  | blue   | na |
| chrUn | 32891824 | 32894508 | 2685 SAT1_CF | blue   | na |
| chrUn | 32894575 | 32895170 | 596 SAT1_CF  | blue   | na |
| chrUn | 32895183 | 32895371 | 189 SAT1_CF  | blue   | na |
| chrUn | 32895423 | 32896123 | 701 SAT1_CF  | blue   | na |
| chrUn | 32896135 | 32896241 | 107 SAT1_CF  | blue   | na |
| chrUn | 32896264 | 32896890 | 627 SAT1_CF  | blue   | na |
| chrUn | 32896926 | 32897043 | 118 SAT1_CF  | blue   | na |
| chrUn | 32898743 | 32899181 | 439 CarSat1  | red    | na |
| chrUn | 32899202 | 32900056 | 855 CarSat1  | red    | na |
| chrUn | 32900077 | 32900872 | 796 CarSat1  | red    | na |
| chrUn | 32900890 | 32901657 | 768 CarSat1  | red    | na |
| chrUn | 32901687 | 32902391 | 705 CarSat1  | red    | na |
| chrUn | 32923104 | 32923874 | 771 Sat2CF   | purple | na |
| chrUn | 32937010 | 32938238 | 1229 Sat2CF  | purple | na |
| chrUn | 32957724 | 32958587 | 864 Sat2CF   | purple | na |
| chrUn | 32957800 | 32958525 | 726 Sat2CF   | purple | na |
| chrUn | 32971546 | 32972797 | 1252 Sat2CF  | purple | na |
| chrUn | 32973116 | 32974386 | 1271 CarSat1 | red    | na |
| chrUn | 32974407 | 32975892 | 1486 CarSat1 | red    | na |
| chrUn | 32984444 | 32985044 | 601 CarSat1  | red    | na |
| chrUn | 32985061 | 32985158 | 98 CarSat1   | red    | na |
| chrUn | 32985352 | 32988426 | 3075 CarSat1 | red    | na |
| chrUn | 32988450 | 32991134 | 2685 CarSat1 | red    | na |
| chrUn | 32991327 | 32993047 | 1721 CarSat1 | red    | na |
| chrUn | 32995150 | 32996200 | 1051 CarSat1 | red    | na |
| chrUn | 32996230 | 32999141 | 2912 CarSat1 | red    | na |
| chrUn | 32999158 | 32999285 | 128 Carsat2  | orange | na |
| chrUn | 32999173 | 33001761 | 2589 CarSat1 | red    | na |
| chrUn | 33001947 | 33002077 | 131 CarSat1  | red    | na |
| chrUn | 33002102 | 33004931 | 2830 CarSat1 | red    | na |
| chrUn | 33012326 | 33013538 | 1213 Sat2CF  | purple | na |
| chrUn | 33034878 | 33036009 | 1132 Sat2CF  | purple | na |

|       |          |          |              |        |    |
|-------|----------|----------|--------------|--------|----|
| chrUn | 33035561 | 33036059 | 499 Sat2CF   | purple | na |
| chrUn | 33055634 | 33056589 | 956 Sat2CF   | purple | na |
| chrUn | 33055709 | 33056568 | 860 Sat2CF   | purple | na |
| chrUn | 33069260 | 33069650 | 391 Sat2CF   | purple | na |
| chrUn | 33069326 | 33069677 | 352 Sat2CF   | purple | na |
| chrUn | 33087705 | 33087841 | 137 Sat2CF   | purple | na |
| chrUn | 33087730 | 33088528 | 799 Sat2CF   | purple | na |
| chrUn | 33113171 | 33114325 | 1155 Sat2CF  | purple | na |
| chrUn | 33118525 | 33119213 | 689 SAT1_CF  | blue   | na |
| chrUn | 33119226 | 33120076 | 851 SAT1_CF  | blue   | na |
| chrUn | 33120088 | 33120765 | 678 SAT1_CF  | blue   | na |
| chrUn | 33120792 | 33121335 | 544 SAT1_CF  | blue   | na |
| chrUn | 33121379 | 33121923 | 545 SAT1_CF  | blue   | na |
| chrUn | 33121947 | 33122548 | 602 SAT1_CF  | blue   | na |
| chrUn | 33122618 | 33122749 | 132 SAT1_CF  | blue   | na |
| chrUn | 33122777 | 33124623 | 1847 SAT1_CF | blue   | na |
| chrUn | 33124666 | 33125333 | 668 SAT1_CF  | blue   | na |
| chrUn | 33125356 | 33125967 | 612 SAT1_CF  | blue   | na |
| chrUn | 33125978 | 33126531 | 554 SAT1_CF  | blue   | na |
| chrUn | 33126574 | 33127136 | 563 SAT1_CF  | blue   | na |
| chrUn | 33127201 | 33128566 | 1366 SAT1_CF | blue   | na |
| chrUn | 33128580 | 33129072 | 493 SAT1_CF  | blue   | na |
| chrUn | 33129087 | 33129687 | 601 SAT1_CF  | blue   | na |
| chrUn | 33129713 | 33130802 | 1090 SAT1_CF | blue   | na |
| chrUn | 33130829 | 33131463 | 635 SAT1_CF  | blue   | na |
| chrUn | 33131485 | 33132006 | 522 SAT1_CF  | blue   | na |
| chrUn | 33132053 | 33132189 | 137 SAT1_CF  | blue   | na |
| chrUn | 33132204 | 33133410 | 1207 SAT1_CF | blue   | na |
| chrUn | 33133438 | 33134069 | 632 SAT1_CF  | blue   | na |
| chrUn | 33134112 | 33134776 | 665 SAT1_CF  | blue   | na |
| chrUn | 33134799 | 33135482 | 684 SAT1_CF  | blue   | na |
| chrUn | 33135494 | 33135969 | 476 SAT1_CF  | blue   | na |
| chrUn | 33136039 | 33136712 | 674 SAT1_CF  | blue   | na |
| chrUn | 33136724 | 33137266 | 543 SAT1_CF  | blue   | na |
| chrUn | 33137309 | 33138458 | 1150 SAT1_CF | blue   | na |
| chrUn | 33138471 | 33139321 | 851 SAT1_CF  | blue   | na |
| chrUn | 33139334 | 33139856 | 523 SAT1_CF  | blue   | na |
| chrUn | 33139883 | 33140147 | 265 SAT1_CF  | blue   | na |
| chrUn | 33140174 | 33140676 | 503 SAT1_CF  | blue   | na |
| chrUn | 33140714 | 33141676 | 963 SAT1_CF  | blue   | na |
| chrUn | 33141755 | 33142080 | 326 SAT1_CF  | blue   | na |
| chrUn | 33142104 | 33143434 | 1331 SAT1_CF | blue   | na |

|       |          |          |              |      |    |
|-------|----------|----------|--------------|------|----|
| chrUn | 33143446 | 33143997 | 552 SAT1_CF  | blue | na |
| chrUn | 33144016 | 33144430 | 415 SAT1_CF  | blue | na |
| chrUn | 33144448 | 33145038 | 591 SAT1_CF  | blue | na |
| chrUn | 33145065 | 33145567 | 503 SAT1_CF  | blue | na |
| chrUn | 33145620 | 33146503 | 884 SAT1_CF  | blue | na |
| chrUn | 33146535 | 33147349 | 815 SAT1_CF  | blue | na |
| chrUn | 33147391 | 33148139 | 749 SAT1_CF  | blue | na |
| chrUn | 33148152 | 33148634 | 483 SAT1_CF  | blue | na |
| chrUn | 33148718 | 33149060 | 343 SAT1_CF  | blue | na |
| chrUn | 33149103 | 33150073 | 971 SAT1_CF  | blue | na |
| chrUn | 33150117 | 33151435 | 1319 SAT1_CF | blue | na |
| chrUn | 33151447 | 33152136 | 690 SAT1_CF  | blue | na |
| chrUn | 33152149 | 33152650 | 502 SAT1_CF  | blue | na |
| chrUn | 33152695 | 33154074 | 1380 SAT1_CF | blue | na |
| chrUn | 33154144 | 33155006 | 863 SAT1_CF  | blue | na |
| chrUn | 33155018 | 33155650 | 633 SAT1_CF  | blue | na |
| chrUn | 33155667 | 33155780 | 114 SAT1_CF  | blue | na |
| chrUn | 33155792 | 33156092 | 301 SAT1_CF  | blue | na |
| chrUn | 33156105 | 33157663 | 1559 SAT1_CF | blue | na |
| chrUn | 33157718 | 33158679 | 962 SAT1_CF  | blue | na |
| chrUn | 33158723 | 33159399 | 677 SAT1_CF  | blue | na |
| chrUn | 33159411 | 33160093 | 683 SAT1_CF  | blue | na |
| chrUn | 33160106 | 33160604 | 499 SAT1_CF  | blue | na |
| chrUn | 33160660 | 33161529 | 870 SAT1_CF  | blue | na |
| chrUn | 33161558 | 33161762 | 205 SAT1_CF  | blue | na |
| chrUn | 33161776 | 33162425 | 650 SAT1_CF  | blue | na |
| chrUn | 33162502 | 33163364 | 863 SAT1_CF  | blue | na |
| chrUn | 33163376 | 33163931 | 556 SAT1_CF  | blue | na |
| chrUn | 33163952 | 33164059 | 108 SAT1_CF  | blue | na |
| chrUn | 33164079 | 33164573 | 495 SAT1_CF  | blue | na |
| chrUn | 33164619 | 33164982 | 364 SAT1_CF  | blue | na |
| chrUn | 33165028 | 33165921 | 894 SAT1_CF  | blue | na |
| chrUn | 33165934 | 33167239 | 1306 SAT1_CF | blue | na |
| chrUn | 33167265 | 33168063 | 799 SAT1_CF  | blue | na |
| chrUn | 33168076 | 33168764 | 689 SAT1_CF  | blue | na |
| chrUn | 33168841 | 33169380 | 540 SAT1_CF  | blue | na |
| chrUn | 33169402 | 33169550 | 149 SAT1_CF  | blue | na |
| chrUn | 33169594 | 33170925 | 1332 SAT1_CF | blue | na |
| chrUn | 33170939 | 33171560 | 622 SAT1_CF  | blue | na |
| chrUn | 33171585 | 33171689 | 105 SAT1_CF  | blue | na |
| chrUn | 33171701 | 33172306 | 606 SAT1_CF  | blue | na |
| chrUn | 33172319 | 33172839 | 521 SAT1_CF  | blue | na |

|       |          |          |              |      |    |
|-------|----------|----------|--------------|------|----|
| chrUn | 33172907 | 33175483 | 2577 SAT1_CF | blue | na |
| chrUn | 33175503 | 33175998 | 496 SAT1_CF  | blue | na |
| chrUn | 33176084 | 33176960 | 877 SAT1_CF  | blue | na |
| chrUn | 33177066 | 33177605 | 540 SAT1_CF  | blue | na |
| chrUn | 33177617 | 33178170 | 554 SAT1_CF  | blue | na |
| chrUn | 33178193 | 33178298 | 106 SAT1_CF  | blue | na |
| chrUn | 33178311 | 33179517 | 1207 SAT1_CF | blue | na |
| chrUn | 33179632 | 33180248 | 617 SAT1_CF  | blue | na |
| chrUn | 33180260 | 33181024 | 765 SAT1_CF  | blue | na |
| chrUn | 33181047 | 33181838 | 792 SAT1_CF  | blue | na |
| chrUn | 33181882 | 33182558 | 677 SAT1_CF  | blue | na |
| chrUn | 33182578 | 33183071 | 494 SAT1_CF  | blue | na |
| chrUn | 33183119 | 33183470 | 352 SAT1_CF  | blue | na |
| chrUn | 33184878 | 33186811 | 1934 SAT1_CF | blue | na |
| chrUn | 33186855 | 33187530 | 676 SAT1_CF  | blue | na |
| chrUn | 33187544 | 33188302 | 759 SAT1_CF  | blue | na |
| chrUn | 33188315 | 33189384 | 1070 SAT1_CF | blue | na |
| chrUn | 33189405 | 33189514 | 110 SAT1_CF  | blue | na |
| chrUn | 33189526 | 33190024 | 499 SAT1_CF  | blue | na |
| chrUn | 33190063 | 33190463 | 401 SAT1_CF  | blue | na |
| chrUn | 33190475 | 33192016 | 1542 SAT1_CF | blue | na |
| chrUn | 33192028 | 33192586 | 559 SAT1_CF  | blue | na |
| chrUn | 33192638 | 33192802 | 165 SAT1_CF  | blue | na |
| chrUn | 33192836 | 33194774 | 1939 SAT1_CF | blue | na |
| chrUn | 33194800 | 33195320 | 521 SAT1_CF  | blue | na |
| chrUn | 33195346 | 33195504 | 159 SAT1_CF  | blue | na |
| chrUn | 33195532 | 33196081 | 550 SAT1_CF  | blue | na |
| chrUn | 33196161 | 33196721 | 561 SAT1_CF  | blue | na |
| chrUn | 33196749 | 33197380 | 632 SAT1_CF  | blue | na |
| chrUn | 33197423 | 33198791 | 1369 SAT1_CF | blue | na |
| chrUn | 33198803 | 33199354 | 552 SAT1_CF  | blue | na |
| chrUn | 33199382 | 33199576 | 195 SAT1_CF  | blue | na |
| chrUn | 33199619 | 33200181 | 563 SAT1_CF  | blue | na |
| chrUn | 33200225 | 33202251 | 2027 SAT1_CF | blue | na |
| chrUn | 33202264 | 33202440 | 177 SAT1_CF  | blue | na |
| chrUn | 33202454 | 33203005 | 552 SAT1_CF  | blue | na |
| chrUn | 33203048 | 33203792 | 745 SAT1_CF  | blue | na |
| chrUn | 33203819 | 33204304 | 486 SAT1_CF  | blue | na |
| chrUn | 33204330 | 33205742 | 1413 SAT1_CF | blue | na |
| chrUn | 33205770 | 33206402 | 633 SAT1_CF  | blue | na |
| chrUn | 33206445 | 33208439 | 1995 SAT1_CF | blue | na |
| chrUn | 33208461 | 33209184 | 724 SAT1_CF  | blue | na |



|       |          |          |              |      |    |
|-------|----------|----------|--------------|------|----|
| chrUn | 33209197 | 33209717 | 521 SAT1_CF  | blue | na |
| chrUn | 33209743 | 33209851 | 109 SAT1_CF  | blue | na |
| chrUn | 33209862 | 33210418 | 557 SAT1_CF  | blue | na |
| chrUn | 33210451 | 33210785 | 335 SAT1_CF  | blue | na |
| chrUn | 33210830 | 33211474 | 645 SAT1_CF  | blue | na |
| chrUn | 33211489 | 33212161 | 673 SAT1_CF  | blue | na |
| chrUn | 33212173 | 33212844 | 672 SAT1_CF  | blue | na |
| chrUn | 33212868 | 33213404 | 537 SAT1_CF  | blue | na |
| chrUn | 33213435 | 33214210 | 776 SAT1_CF  | blue | na |
| chrUn | 33214287 | 33215149 | 863 SAT1_CF  | blue | na |
| chrUn | 33215161 | 33215716 | 556 SAT1_CF  | blue | na |
| chrUn | 33215781 | 33216339 | 559 SAT1_CF  | blue | na |
| chrUn | 33216360 | 33216758 | 399 SAT1_CF  | blue | na |
| chrUn | 33216772 | 33218665 | 1894 SAT1_CF | blue | na |
| chrUn | 33218685 | 33219180 | 496 SAT1_CF  | blue | na |
| chrUn | 33219225 | 33219382 | 158 SAT1_CF  | blue | na |
| chrUn | 33219397 | 33219921 | 525 SAT1_CF  | blue | na |
| chrUn | 33220000 | 33221124 | 1125 SAT1_CF | blue | na |
| chrUn | 33221136 | 33221656 | 521 SAT1_CF  | blue | na |
| chrUn | 33221677 | 33222800 | 1124 SAT1_CF | blue | na |
| chrUn | 33222831 | 33223401 | 571 SAT1_CF  | blue | na |
| chrUn | 33224422 | 33225426 | 1005 SAT1_CF | blue | na |
| chrUn | 33225438 | 33226295 | 858 SAT1_CF  | blue | na |
| chrUn | 33226348 | 33227782 | 1435 SAT1_CF | blue | na |
| chrUn | 33227826 | 33228483 | 658 SAT1_CF  | blue | na |
| chrUn | 33228527 | 33229066 | 540 SAT1_CF  | blue | na |
| chrUn | 33229078 | 33230343 | 1266 SAT1_CF | blue | na |
| chrUn | 33230381 | 33230883 | 503 SAT1_CF  | blue | na |
| chrUn | 33230901 | 33232274 | 1374 SAT1_CF | blue | na |
| chrUn | 33232286 | 33232961 | 676 SAT1_CF  | blue | na |
| chrUn | 33233058 | 33233600 | 543 SAT1_CF  | blue | na |
| chrUn | 33233644 | 33234203 | 560 SAT1_CF  | blue | na |
| chrUn | 33234246 | 33234758 | 513 SAT1_CF  | blue | na |
| chrUn | 33234786 | 33234922 | 137 SAT1_CF  | blue | na |
| chrUn | 33235007 | 33235489 | 483 SAT1_CF  | blue | na |
| chrUn | 33235502 | 33236952 | 1451 SAT1_CF | blue | na |
| chrUn | 33236995 | 33237539 | 545 SAT1_CF  | blue | na |
| chrUn | 33237581 | 33237758 | 178 SAT1_CF  | blue | na |
| chrUn | 33237818 | 33238367 | 550 SAT1_CF  | blue | na |
| chrUn | 33238432 | 33239214 | 783 SAT1_CF  | blue | na |
| chrUn | 33239276 | 33241051 | 1776 SAT1_CF | blue | na |
| chrUn | 33241114 | 33241737 | 624 SAT1_CF  | blue | na |

|       |          |          |      |         |      |    |
|-------|----------|----------|------|---------|------|----|
| chrUn | 33241757 | 33242464 | 708  | SAT1_CF | blue | na |
| chrUn | 33242506 | 33244363 | 1858 | SAT1_CF | blue | na |
| chrUn | 33244403 | 33245025 | 623  | SAT1_CF | blue | na |
| chrUn | 33245046 | 33245600 | 555  | SAT1_CF | blue | na |
| chrUn | 33245612 | 33246287 | 676  | SAT1_CF | blue | na |
| chrUn | 33246330 | 33247296 | 967  | SAT1_CF | blue | na |
| chrUn | 33247374 | 33247918 | 545  | SAT1_CF | blue | na |
| chrUn | 33247956 | 33248283 | 328  | SAT1_CF | blue | na |
| chrUn | 33248370 | 33249645 | 1276 | SAT1_CF | blue | na |
| chrUn | 33249657 | 33250375 | 719  | SAT1_CF | blue | na |
| chrUn | 33250454 | 33250776 | 323  | SAT1_CF | blue | na |
| chrUn | 33250788 | 33250897 | 110  | SAT1_CF | blue | na |
| chrUn | 33250918 | 33251465 | 548  | SAT1_CF | blue | na |
| chrUn | 33251508 | 33252235 | 728  | SAT1_CF | blue | na |
| chrUn | 33252300 | 33254079 | 1780 | SAT1_CF | blue | na |
| chrUn | 33254102 | 33254768 | 667  | SAT1_CF | blue | na |
| chrUn | 33254811 | 33255337 | 527  | SAT1_CF | blue | na |
| chrUn | 33255358 | 33256440 | 1083 | SAT1_CF | blue | na |
| chrUn | 33256451 | 33256852 | 402  | SAT1_CF | blue | na |
| chrUn | 33256892 | 33257394 | 503  | SAT1_CF | blue | na |
| chrUn | 33257407 | 33257601 | 195  | SAT1_CF | blue | na |
| chrUn | 33257617 | 33258162 | 546  | SAT1_CF | blue | na |
| chrUn | 33258204 | 33258748 | 545  | SAT1_CF | blue | na |
| chrUn | 33258764 | 33260442 | 1679 | SAT1_CF | blue | na |
| chrUn | 33260454 | 33261107 | 654  | SAT1_CF | blue | na |
| chrUn | 33261203 | 33261750 | 548  | SAT1_CF | blue | na |
| chrUn | 33261778 | 33261934 | 157  | SAT1_CF | blue | na |
| chrUn | 33261979 | 33263182 | 1204 | SAT1_CF | blue | na |
| chrUn | 33263194 | 33264550 | 1357 | SAT1_CF | blue | na |
| chrUn | 33264593 | 33264958 | 366  | SAT1_CF | blue | na |
| chrUn | 33265030 | 33265549 | 520  | SAT1_CF | blue | na |
| chrUn | 33265606 | 33266151 | 546  | SAT1_CF | blue | na |
| chrUn | 33266193 | 33267601 | 1409 | SAT1_CF | blue | na |
| chrUn | 33267645 | 33268013 | 369  | SAT1_CF | blue | na |
| chrUn | 33268053 | 33268554 | 502  | SAT1_CF | blue | na |
| chrUn | 33268576 | 33268679 | 104  | SAT1_CF | blue | na |
| chrUn | 33268696 | 33269325 | 630  | SAT1_CF | blue | na |
| chrUn | 33269339 | 33269951 | 613  | SAT1_CF | blue | na |
| chrUn | 33269963 | 33270821 | 859  | SAT1_CF | blue | na |
| chrUn | 33270898 | 33271444 | 547  | SAT1_CF | blue | na |
| chrUn | 33271575 | 33272054 | 480  | SAT1_CF | blue | na |
| chrUn | 33272134 | 33272657 | 524  | SAT1_CF | blue | na |

|       |          |          |              |      |    |
|-------|----------|----------|--------------|------|----|
| chrUn | 33272672 | 33273369 | 698 SAT1_CF  | blue | na |
| chrUn | 33273389 | 33274719 | 1331 SAT1_CF | blue | na |
| chrUn | 33274802 | 33275362 | 561 SAT1_CF  | blue | na |
| chrUn | 33275446 | 33275994 | 549 SAT1_CF  | blue | na |
| chrUn | 33276022 | 33276725 | 704 SAT1_CF  | blue | na |
| chrUn | 33276746 | 33277419 | 674 SAT1_CF  | blue | na |
| chrUn | 33277431 | 33278292 | 862 SAT1_CF  | blue | na |
| chrUn | 33278334 | 33279113 | 780 SAT1_CF  | blue | na |
| chrUn | 33279193 | 33280138 | 946 SAT1_CF  | blue | na |
| chrUn | 33280208 | 33282276 | 2069 SAT1_CF | blue | na |
| chrUn | 33282297 | 33282817 | 521 SAT1_CF  | blue | na |
| chrUn | 33282830 | 33282936 | 107 SAT1_CF  | blue | na |
| chrUn | 33282959 | 33283533 | 575 SAT1_CF  | blue | na |
| chrUn | 33283545 | 33285673 | 2129 SAT1_CF | blue | na |
| chrUn | 33285701 | 33285858 | 158 SAT1_CF  | blue | na |
| chrUn | 33285903 | 33286403 | 501 SAT1_CF  | blue | na |
| chrUn | 33286430 | 33287097 | 668 SAT1_CF  | blue | na |
| chrUn | 33287109 | 33287788 | 680 SAT1_CF  | blue | na |
| chrUn | 33287831 | 33288793 | 963 SAT1_CF  | blue | na |
| chrUn | 33288872 | 33289830 | 959 SAT1_CF  | blue | na |
| chrUn | 33289851 | 33290629 | 779 SAT1_CF  | blue | na |
| chrUn | 33290673 | 33291220 | 548 SAT1_CF  | blue | na |
| chrUn | 33291263 | 33291893 | 631 SAT1_CF  | blue | na |
| chrUn | 33291920 | 33292482 | 563 SAT1_CF  | blue | na |
| chrUn | 33292562 | 33292874 | 313 SAT1_CF  | blue | na |
| chrUn | 33292893 | 33293435 | 543 SAT1_CF  | blue | na |
| chrUn | 33293506 | 33294141 | 636 SAT1_CF  | blue | na |
| chrUn | 33294153 | 33295312 | 1160 SAT1_CF | blue | na |
| chrUn | 33295332 | 33295941 | 610 SAT1_CF  | blue | na |
| chrUn | 33296021 | 33296186 | 166 SAT1_CF  | blue | na |
| chrUn | 33296367 | 33296552 | 186 SAT1_CF  | blue | na |
| chrUn | 33296569 | 33297088 | 520 SAT1_CF  | blue | na |
| chrUn | 33297101 | 33297206 | 106 SAT1_CF  | blue | na |
| chrUn | 33297229 | 33297860 | 632 SAT1_CF  | blue | na |
| chrUn | 33297872 | 33298555 | 684 SAT1_CF  | blue | na |
| chrUn | 33298567 | 33299166 | 600 SAT1_CF  | blue | na |
| chrUn | 33299224 | 33299581 | 358 SAT1_CF  | blue | na |
| chrUn | 33299602 | 33300154 | 553 SAT1_CF  | blue | na |
| chrUn | 33300166 | 33301046 | 881 SAT1_CF  | blue | na |
| chrUn | 33301085 | 33301610 | 526 SAT1_CF  | blue | na |
| chrUn | 33301625 | 33302330 | 706 SAT1_CF  | blue | na |
| chrUn | 33302357 | 33303101 | 745 SAT1_CF  | blue | na |

|       |          |          |              |      |    |
|-------|----------|----------|--------------|------|----|
| chrUn | 33303113 | 33303936 | 824 SAT1_CF  | blue | na |
| chrUn | 33303979 | 33304761 | 783 SAT1_CF  | blue | na |
| chrUn | 33304841 | 33305388 | 548 SAT1_CF  | blue | na |
| chrUn | 33305399 | 33305799 | 401 SAT1_CF  | blue | na |
| chrUn | 33305839 | 33307211 | 1373 SAT1_CF | blue | na |
| chrUn | 33307253 | 33308329 | 1077 SAT1_CF | blue | na |
| chrUn | 33308372 | 33308919 | 548 SAT1_CF  | blue | na |
| chrUn | 33308947 | 33309083 | 137 SAT1_CF  | blue | na |
| chrUn | 33309149 | 33309650 | 502 SAT1_CF  | blue | na |
| chrUn | 33309673 | 33310346 | 674 SAT1_CF  | blue | na |
| chrUn | 33310358 | 33311196 | 839 SAT1_CF  | blue | na |
| chrUn | 33311238 | 33312276 | 1039 SAT1_CF | blue | na |
| chrUn | 33312333 | 33313009 | 677 SAT1_CF  | blue | na |
| chrUn | 33313037 | 33314422 | 1386 SAT1_CF | blue | na |
| chrUn | 33314456 | 33314835 | 380 SAT1_CF  | blue | na |
| chrUn | 33314875 | 33315376 | 502 SAT1_CF  | blue | na |
| chrUn | 33315389 | 33316150 | 762 SAT1_CF  | blue | na |
| chrUn | 33316167 | 33317391 | 1225 SAT1_CF | blue | na |
| chrUn | 33317416 | 33317561 | 146 SAT1_CF  | blue | na |
| chrUn | 33317616 | 33318674 | 1059 SAT1_CF | blue | na |
| chrUn | 33318751 | 33319293 | 543 SAT1_CF  | blue | na |
| chrUn | 33319306 | 33319412 | 107 SAT1_CF  | blue | na |
| chrUn | 33319435 | 33320829 | 1395 SAT1_CF | blue | na |
| chrUn | 33320842 | 33320943 | 102 SAT1_CF  | blue | na |
| chrUn | 33320971 | 33322127 | 1157 SAT1_CF | blue | na |
| chrUn | 33322144 | 33323448 | 1305 SAT1_CF | blue | na |
| chrUn | 33323488 | 33324779 | 1292 SAT1_CF | blue | na |
| chrUn | 33324830 | 33325365 | 536 SAT1_CF  | blue | na |
| chrUn | 33326773 | 33327484 | 712 SAT1_CF  | blue | na |
| chrUn | 33327503 | 33328036 | 534 SAT1_CF  | blue | na |
| chrUn | 33328078 | 33329066 | 989 SAT1_CF  | blue | na |
| chrUn | 33330111 | 33331711 | 1601 SAT1_CF | blue | na |
| chrUn | 33331737 | 33332282 | 546 SAT1_CF  | blue | na |
| chrUn | 33332327 | 33332958 | 632 SAT1_CF  | blue | na |
| chrUn | 33332986 | 33333548 | 563 SAT1_CF  | blue | na |
| chrUn | 33333628 | 33334137 | 510 SAT1_CF  | blue | na |
| chrUn | 33334165 | 33334298 | 134 SAT1_CF  | blue | na |
| chrUn | 33334356 | 33336240 | 1885 SAT1_CF | blue | na |
| chrUn | 33336282 | 33336826 | 545 SAT1_CF  | blue | na |
| chrUn | 33336862 | 33337723 | 862 SAT1_CF  | blue | na |
| chrUn | 33337737 | 33338139 | 403 SAT1_CF  | blue | na |
| chrUn | 33338179 | 33338678 | 500 SAT1_CF  | blue | na |

|       |          |          |              |      |    |
|-------|----------|----------|--------------|------|----|
| chrUn | 33338705 | 33340715 | 2011 SAT1_CF | blue | na |
| chrUn | 33340759 | 33341247 | 489 SAT1_CF  | blue | na |
| chrUn | 33341260 | 33341760 | 501 SAT1_CF  | blue | na |
| chrUn | 33341773 | 33342456 | 684 SAT1_CF  | blue | na |
| chrUn | 33342468 | 33343899 | 1432 SAT1_CF | blue | na |
| chrUn | 33343942 | 33344558 | 617 SAT1_CF  | blue | na |
| chrUn | 33344585 | 33344675 | 91 SAT1_CF   | blue | na |
| chrUn | 33344699 | 33345251 | 553 SAT1_CF  | blue | na |
| chrUn | 33345263 | 33345938 | 676 SAT1_CF  | blue | na |
| chrUn | 33345981 | 33348019 | 2039 SAT1_CF | blue | na |
| chrUn | 33348081 | 33348561 | 481 SAT1_CF  | blue | na |
| chrUn | 33348574 | 33349247 | 674 SAT1_CF  | blue | na |
| chrUn | 33349290 | 33349921 | 632 SAT1_CF  | blue | na |
| chrUn | 33349949 | 33351182 | 1234 SAT1_CF | blue | na |
| chrUn | 33351205 | 33351730 | 526 SAT1_CF  | blue | na |
| chrUn | 33351748 | 33352263 | 516 SAT1_CF  | blue | na |
| chrUn | 33352350 | 33352849 | 500 SAT1_CF  | blue | na |
| chrUn | 33352872 | 33354230 | 1359 SAT1_CF | blue | na |
| chrUn | 33354243 | 33354414 | 172 SAT1_CF  | blue | na |
| chrUn | 33354456 | 33355000 | 545 SAT1_CF  | blue | na |
| chrUn | 33355038 | 33356069 | 1032 SAT1_CF | blue | na |
| chrUn | 33356136 | 33356637 | 502 SAT1_CF  | blue | na |
| chrUn | 33356664 | 33358692 | 2029 SAT1_CF | blue | na |
| chrUn | 33358771 | 33359331 | 561 SAT1_CF  | blue | na |
| chrUn | 33359472 | 33360438 | 967 SAT1_CF  | blue | na |
| chrUn | 33360484 | 33360981 | 498 SAT1_CF  | blue | na |
| chrUn | 33360999 | 33361669 | 671 SAT1_CF  | blue | na |
| chrUn | 33361690 | 33362150 | 461 SAT1_CF  | blue | na |
| chrUn | 33362192 | 33362726 | 535 SAT1_CF  | blue | na |
| chrUn | 33362770 | 33363738 | 969 SAT1_CF  | blue | na |
| chrUn | 33363750 | 33364427 | 678 SAT1_CF  | blue | na |
| chrUn | 33364446 | 33365151 | 706 SAT1_CF  | blue | na |
| chrUn | 33365229 | 33365941 | 713 SAT1_CF  | blue | na |
| chrUn | 33365988 | 33366501 | 514 SAT1_CF  | blue | na |
| chrUn | 33366526 | 33367204 | 679 SAT1_CF  | blue | na |
| chrUn | 33367216 | 33367325 | 110 SAT1_CF  | blue | na |
| chrUn | 33367345 | 33368588 | 1244 SAT1_CF | blue | na |
| chrUn | 33368631 | 33370285 | 1655 SAT1_CF | blue | na |
| chrUn | 33370296 | 33370615 | 320 SAT1_CF  | blue | na |
| chrUn | 33370668 | 33371168 | 501 SAT1_CF  | blue | na |
| chrUn | 33371180 | 33371863 | 684 SAT1_CF  | blue | na |
| chrUn | 33371877 | 33373658 | 1782 SAT1_CF | blue | na |

|       |          |          |              |      |    |
|-------|----------|----------|--------------|------|----|
| chrUn | 33373671 | 33374025 | 355 SAT1_CF  | blue | na |
| chrUn | 33374112 | 33374613 | 502 SAT1_CF  | blue | na |
| chrUn | 33374626 | 33374734 | 109 SAT1_CF  | blue | na |
| chrUn | 33374755 | 33375316 | 562 SAT1_CF  | blue | na |
| chrUn | 33375329 | 33376175 | 847 SAT1_CF  | blue | na |
| chrUn | 33376217 | 33376760 | 544 SAT1_CF  | blue | na |
| chrUn | 33376798 | 33377104 | 307 SAT1_CF  | blue | na |
| chrUn | 33377136 | 33377659 | 524 SAT1_CF  | blue | na |
| chrUn | 33377692 | 33378071 | 380 SAT1_CF  | blue | na |
| chrUn | 33378141 | 33378686 | 546 SAT1_CF  | blue | na |
| chrUn | 33378699 | 33379499 | 801 SAT1_CF  | blue | na |
| chrUn | 33379525 | 33381245 | 1721 SAT1_CF | blue | na |
| chrUn | 33381257 | 33381330 | 74 SAT1_CF   | blue | na |
| chrUn | 33381386 | 33381940 | 555 SAT1_CF  | blue | na |
| chrUn | 33381952 | 33384438 | 2487 SAT1_CF | blue | na |
| chrUn | 33384458 | 33384565 | 108 SAT1_CF  | blue | na |
| chrUn | 33384586 | 33385741 | 1156 SAT1_CF | blue | na |
| chrUn | 33385796 | 33386405 | 610 SAT1_CF  | blue | na |
| chrUn | 33386447 | 33386802 | 356 SAT1_CF  | blue | na |
| chrUn | 33386889 | 33387389 | 501 SAT1_CF  | blue | na |
| chrUn | 33387416 | 33388771 | 1356 SAT1_CF | blue | na |
| chrUn | 33388814 | 33389778 | 965 SAT1_CF  | blue | na |
| chrUn | 33389845 | 33391210 | 1366 SAT1_CF | blue | na |
| chrUn | 33391252 | 33392030 | 779 SAT1_CF  | blue | na |
| chrUn | 33392042 | 33393205 | 1164 SAT1_CF | blue | na |
| chrUn | 33393216 | 33393742 | 527 SAT1_CF  | blue | na |
| chrUn | 33393784 | 33394295 | 512 SAT1_CF  | blue | na |
| chrUn | 33394328 | 33394659 | 332 SAT1_CF  | blue | na |
| chrUn | 33394748 | 33395248 | 501 SAT1_CF  | blue | na |
| chrUn | 33395260 | 33396018 | 759 SAT1_CF  | blue | na |
| chrUn | 33396042 | 33396901 | 860 SAT1_CF  | blue | na |
| chrUn | 33396919 | 33397604 | 686 SAT1_CF  | blue | na |
| chrUn | 33397616 | 33398466 | 851 SAT1_CF  | blue | na |
| chrUn | 33398516 | 33400398 | 1883 SAT1_CF | blue | na |
| chrUn | 33400515 | 33401034 | 520 SAT1_CF  | blue | na |
| chrUn | 33401091 | 33401637 | 547 SAT1_CF  | blue | na |
| chrUn | 33401717 | 33402260 | 544 SAT1_CF  | blue | na |
| chrUn | 33402357 | 33403499 | 1143 SAT1_CF | blue | na |
| chrUn | 33403541 | 33404039 | 499 SAT1_CF  | blue | na |
| chrUn | 33404057 | 33404739 | 683 SAT1_CF  | blue | na |
| chrUn | 33404752 | 33404823 | 72 SAT1_CF   | blue | na |
| chrUn | 33404846 | 33406301 | 1456 SAT1_CF | blue | na |

|       |          |          |              |        |    |
|-------|----------|----------|--------------|--------|----|
| chrUn | 33406369 | 33408312 | 1944 SAT1_CF | blue   | na |
| chrUn | 33408356 | 33408781 | 426 SAT1_CF  | blue   | na |
| chrUn | 33408803 | 33409732 | 930 SAT1_CF  | blue   | na |
| chrUn | 33409770 | 33410268 | 499 SAT1_CF  | blue   | na |
| chrUn | 33410281 | 33411040 | 760 SAT1_CF  | blue   | na |
| chrUn | 33411052 | 33411974 | 923 SAT1_CF  | blue   | na |
| chrUn | 33411992 | 33412510 | 519 SAT1_CF  | blue   | na |
| chrUn | 33412541 | 33413065 | 525 SAT1_CF  | blue   | na |
| chrUn | 33413109 | 33413576 | 468 SAT1_CF  | blue   | na |
| chrUn | 33413737 | 33413823 | 87 SAT1_CF   | blue   | na |
| chrUn | 33413851 | 33414411 | 561 SAT1_CF  | blue   | na |
| chrUn | 33414492 | 33414666 | 175 SAT1_CF  | blue   | na |
| chrUn | 33414734 | 33415254 | 521 SAT1_CF  | blue   | na |
| chrUn | 33415267 | 33415915 | 649 SAT1_CF  | blue   | na |
| chrUn | 33416046 | 33416837 | 792 SAT1_CF  | blue   | na |
| chrUn | 33416881 | 33417141 | 261 SAT1_CF  | blue   | na |
| chrUn | 33417179 | 33418366 | 1188 SAT1_CF | blue   | na |
| chrUn | 33418409 | 33418921 | 513 SAT1_CF  | blue   | na |
| chrUn | 33418999 | 33419543 | 545 SAT1_CF  | blue   | na |
| chrUn | 33419585 | 33423323 | 3739 SAT1_CF | blue   | na |
| chrUn | 33423351 | 33423982 | 632 SAT1_CF  | blue   | na |
| chrUn | 33423994 | 33424532 | 539 SAT1_CF  | blue   | na |
| chrUn | 33428884 | 33428968 | 85 SAT1_CF   | blue   | na |
| chrUn | 33429012 | 33430696 | 1685 SAT1_CF | blue   | na |
| chrUn | 33453079 | 33453358 | 280 Sat2CF   | purple | na |
| chrUn | 33453143 | 33453353 | 211 Sat2CF   | purple | na |
| chrUn | 33453579 | 33453867 | 289 Sat2CF   | purple | na |
| chrUn | 33475414 | 33475615 | 202 Sat2CF   | purple | na |
| chrUn | 33475455 | 33476631 | 1177 Sat2CF  | purple | na |
| chrUn | 33500583 | 33500732 | 150 Sat2CF   | purple | na |
| chrUn | 33500603 | 33501820 | 1218 Sat2CF  | purple | na |
| chrUn | 33532787 | 33533941 | 1155 Sat2CF  | purple | na |
| chrUn | 33684209 | 33684719 | 511 SAT1_CF  | blue   | na |
| chrUn | 33684734 | 33684891 | 158 SAT1_CF  | blue   | na |
| chrUn | 33684938 | 33685438 | 501 SAT1_CF  | blue   | na |
| chrUn | 33685450 | 33685556 | 107 SAT1_CF  | blue   | na |
| chrUn | 33685580 | 33686134 | 555 SAT1_CF  | blue   | na |
| chrUn | 33686156 | 33687684 | 1529 SAT1_CF | blue   | na |
| chrUn | 33687727 | 33689647 | 1921 SAT1_CF | blue   | na |
| chrUn | 33689700 | 33690202 | 503 SAT1_CF  | blue   | na |
| chrUn | 33690215 | 33690897 | 683 SAT1_CF  | blue   | na |
| chrUn | 33690921 | 33691630 | 710 SAT1_CF  | blue   | na |

|       |          |          |              |      |    |
|-------|----------|----------|--------------|------|----|
| chrUn | 33691654 | 33692168 | 515 SAT1_CF  | blue | na |
| chrUn | 33692184 | 33692427 | 244 SAT1_CF  | blue | na |
| chrUn | 33692505 | 33694564 | 2060 SAT1_CF | blue | na |
| chrUn | 33694576 | 33695436 | 861 SAT1_CF  | blue | na |
| chrUn | 33695478 | 33696019 | 542 SAT1_CF  | blue | na |
| chrUn | 33696065 | 33696882 | 818 SAT1_CF  | blue | na |
| chrUn | 33696915 | 33697566 | 652 SAT1_CF  | blue | na |
| chrUn | 33697585 | 33697748 | 164 SAT1_CF  | blue | na |
| chrUn | 33697761 | 33699279 | 1519 SAT1_CF | blue | na |
| chrUn | 33699307 | 33700532 | 1226 SAT1_CF | blue | na |
| chrUn | 33700612 | 33701133 | 522 SAT1_CF  | blue | na |
| chrUn | 33701165 | 33701259 | 95 SAT1_CF   | blue | na |
| chrUn | 33701274 | 33701794 | 521 SAT1_CF  | blue | na |
| chrUn | 33701822 | 33701913 | 92 SAT1_CF   | blue | na |
| chrUn | 33701937 | 33702491 | 555 SAT1_CF  | blue | na |
| chrUn | 33702503 | 33703365 | 863 SAT1_CF  | blue | na |
| chrUn | 33703407 | 33703948 | 542 SAT1_CF  | blue | na |
| chrUn | 33703983 | 33704849 | 867 SAT1_CF  | blue | na |
| chrUn | 33704929 | 33705510 | 582 SAT1_CF  | blue | na |
| chrUn | 33705522 | 33706198 | 677 SAT1_CF  | blue | na |
| chrUn | 33706241 | 33706870 | 630 SAT1_CF  | blue | na |
| chrUn | 33706898 | 33707462 | 565 SAT1_CF  | blue | na |
| chrUn | 33707541 | 33708064 | 524 SAT1_CF  | blue | na |
| chrUn | 33708079 | 33708237 | 159 SAT1_CF  | blue | na |
| chrUn | 33708281 | 33708781 | 501 SAT1_CF  | blue | na |
| chrUn | 33708803 | 33709477 | 675 SAT1_CF  | blue | na |
| chrUn | 33709489 | 33710360 | 872 SAT1_CF  | blue | na |
| chrUn | 33710383 | 33711404 | 1022 SAT1_CF | blue | na |
| chrUn | 33711503 | 33712325 | 823 SAT1_CF  | blue | na |
| chrUn | 33712358 | 33712732 | 375 SAT1_CF  | blue | na |
| chrUn | 33712757 | 33713278 | 522 SAT1_CF  | blue | na |
| chrUn | 33713291 | 33714625 | 1335 SAT1_CF | blue | na |
| chrUn | 33714669 | 33716048 | 1380 SAT1_CF | blue | na |
| chrUn | 33716068 | 33716588 | 521 SAT1_CF  | blue | na |
| chrUn | 33716601 | 33717284 | 684 SAT1_CF  | blue | na |
| chrUn | 33717296 | 33720267 | 2972 SAT1_CF | blue | na |
| chrUn | 33720368 | 33720816 | 449 SAT1_CF  | blue | na |
| chrUn | 33720859 | 33721823 | 965 SAT1_CF  | blue | na |
| chrUn | 33721849 | 33722654 | 806 SAT1_CF  | blue | na |
| chrUn | 33722720 | 33723221 | 502 SAT1_CF  | blue | na |
| chrUn | 33723233 | 33723341 | 109 SAT1_CF  | blue | na |
| chrUn | 33723364 | 33723919 | 556 SAT1_CF  | blue | na |



|       |          |          |              |      |    |
|-------|----------|----------|--------------|------|----|
| chrUn | 33723931 | 33724040 | 110 SAT1_CF  | blue | na |
| chrUn | 33724060 | 33724604 | 545 SAT1_CF  | blue | na |
| chrUn | 33724647 | 33726008 | 1362 SAT1_CF | blue | na |
| chrUn | 33726036 | 33726172 | 137 SAT1_CF  | blue | na |
| chrUn | 33726219 | 33726785 | 567 SAT1_CF  | blue | na |
| chrUn | 33726855 | 33727472 | 618 SAT1_CF  | blue | na |
| chrUn | 33727484 | 33729221 | 1738 SAT1_CF | blue | na |
| chrUn | 33729233 | 33729909 | 677 SAT1_CF  | blue | na |
| chrUn | 33729925 | 33730720 | 796 SAT1_CF  | blue | na |
| chrUn | 33730732 | 33732492 | 1761 SAT1_CF | blue | na |
| chrUn | 33732536 | 33733082 | 547 SAT1_CF  | blue | na |
| chrUn | 33733152 | 33733668 | 517 SAT1_CF  | blue | na |
| chrUn | 33733706 | 33734977 | 1272 SAT1_CF | blue | na |
| chrUn | 33735017 | 33735511 | 495 SAT1_CF  | blue | na |
| chrUn | 33735545 | 33736213 | 669 SAT1_CF  | blue | na |
| chrUn | 33736225 | 33736900 | 676 SAT1_CF  | blue | na |
| chrUn | 33736943 | 33738680 | 1738 SAT1_CF | blue | na |
| chrUn | 33738692 | 33740053 | 1362 SAT1_CF | blue | na |
| chrUn | 33740066 | 33740645 | 580 SAT1_CF  | blue | na |
| chrUn | 33740708 | 33741945 | 1238 SAT1_CF | blue | na |
| chrUn | 33741988 | 33743643 | 1656 SAT1_CF | blue | na |
| chrUn | 33743654 | 33743973 | 320 SAT1_CF  | blue | na |
| chrUn | 33744026 | 33744527 | 502 SAT1_CF  | blue | na |
| chrUn | 33744539 | 33745222 | 684 SAT1_CF  | blue | na |
| chrUn | 33745236 | 33746494 | 1259 SAT1_CF | blue | na |
| chrUn | 33746581 | 33747073 | 493 SAT1_CF  | blue | na |
| chrUn | 33747093 | 33747208 | 116 SAT1_CF  | blue | na |
| chrUn | 33747221 | 33747862 | 642 SAT1_CF  | blue | na |
| chrUn | 33747881 | 33749545 | 1665 SAT1_CF | blue | na |
| chrUn | 33749588 | 33750173 | 586 SAT1_CF  | blue | na |
| chrUn | 33750185 | 33751782 | 1598 SAT1_CF | blue | na |
| chrUn | 33751794 | 33753207 | 1414 SAT1_CF | blue | na |
| chrUn | 33753253 | 33753626 | 374 SAT1_CF  | blue | na |
| chrUn | 33753662 | 33754162 | 501 SAT1_CF  | blue | na |
| chrUn | 33754175 | 33754282 | 108 SAT1_CF  | blue | na |
| chrUn | 33754304 | 33754858 | 555 SAT1_CF  | blue | na |
| chrUn | 33754876 | 33755550 | 675 SAT1_CF  | blue | na |
| chrUn | 33755611 | 33756155 | 545 SAT1_CF  | blue | na |
| chrUn | 33756213 | 33756714 | 502 SAT1_CF  | blue | na |
| chrUn | 33756751 | 33756908 | 158 SAT1_CF  | blue | na |
| chrUn | 33756934 | 33757455 | 522 SAT1_CF  | blue | na |
| chrUn | 33757468 | 33758602 | 1135 SAT1_CF | blue | na |

|       |          |          |              |        |    |
|-------|----------|----------|--------------|--------|----|
| chrUn | 33758614 | 33759266 | 653 SAT1_CF  | blue   | na |
| chrUn | 33759309 | 33759511 | 203 SAT1_CF  | blue   | na |
| chrUn | 33759691 | 33759876 | 186 SAT1_CF  | blue   | na |
| chrUn | 33759912 | 33760410 | 499 SAT1_CF  | blue   | na |
| chrUn | 33760437 | 33761143 | 707 SAT1_CF  | blue   | na |
| chrUn | 33761166 | 33761898 | 733 SAT1_CF  | blue   | na |
| chrUn | 33761911 | 33763524 | 1614 SAT1_CF | blue   | na |
| chrUn | 33763544 | 33764350 | 807 SAT1_CF  | blue   | na |
| chrUn | 33764362 | 33765038 | 677 SAT1_CF  | blue   | na |
| chrUn | 33765087 | 33766062 | 976 SAT1_CF  | blue   | na |
| chrUn | 33766104 | 33766611 | 508 SAT1_CF  | blue   | na |
| chrUn | 33766625 | 33767026 | 402 SAT1_CF  | blue   | na |
| chrUn | 33767066 | 33767568 | 503 SAT1_CF  | blue   | na |
| chrUn | 33767581 | 33767688 | 108 SAT1_CF  | blue   | na |
| chrUn | 33767710 | 33768263 | 554 SAT1_CF  | blue   | na |
| chrUn | 33768275 | 33769729 | 1455 SAT1_CF | blue   | na |
| chrUn | 33769741 | 33769847 | 107 SAT1_CF  | blue   | na |
| chrUn | 33769871 | 33770421 | 551 SAT1_CF  | blue   | na |
| chrUn | 33770456 | 33771619 | 1164 SAT1_CF | blue   | na |
| chrUn | 33771634 | 33771770 | 137 SAT1_CF  | blue   | na |
| chrUn | 33771866 | 33772385 | 520 SAT1_CF  | blue   | na |
| chrUn | 33772442 | 33772988 | 547 SAT1_CF  | blue   | na |
| chrUn | 33773007 | 33773584 | 578 SAT1_CF  | blue   | na |
| chrUn | 33773619 | 33774820 | 1202 SAT1_CF | blue   | na |
| chrUn | 33774833 | 33775446 | 614 SAT1_CF  | blue   | na |
| chrUn | 33775458 | 33776317 | 860 SAT1_CF  | blue   | na |
| chrUn | 33776360 | 33777135 | 776 SAT1_CF  | blue   | na |
| chrUn | 33777179 | 33777721 | 543 SAT1_CF  | blue   | na |
| chrUn | 33777734 | 33779630 | 1897 SAT1_CF | blue   | na |
| chrUn | 33779685 | 33780290 | 606 SAT1_CF  | blue   | na |
| chrUn | 33780306 | 33780706 | 401 SAT1_CF  | blue   | na |
| chrUn | 33780727 | 33781245 | 519 SAT1_CF  | blue   | na |
| chrUn | 33781258 | 33781366 | 109 SAT1_CF  | blue   | na |
| chrUn | 33781387 | 33781932 | 546 SAT1_CF  | blue   | na |
| chrUn | 33781975 | 33782939 | 965 SAT1_CF  | blue   | na |
| chrUn | 33783018 | 33783565 | 548 SAT1_CF  | blue   | na |
| chrUn | 33783576 | 33784181 | 606 SAT1_CF  | blue   | na |
| chrUn | 33790906 | 33791105 | 200 Sat2CF   | purple | na |
| chrUn | 33790947 | 33792052 | 1106 Sat2CF  | purple | na |
| chrUn | 33851664 | 33852770 | 1107 Sat2CF  | purple | na |
| chrUn | 33864645 | 33865482 | 838 Sat2CF   | purple | na |
| chrUn | 33864695 | 33865417 | 723 Sat2CF   | purple | na |

|       |          |          |              |        |    |
|-------|----------|----------|--------------|--------|----|
| chrUn | 33877603 | 33877780 | 178 Sat2CF   | purple | na |
| chrUn | 33877672 | 33878841 | 1170 Sat2CF  | purple | na |
| chrUn | 33879240 | 33879674 | 435 CarSat1  | red    | na |
| chrUn | 33879858 | 33879980 | 123 CarSat1  | red    | na |
| chrUn | 33880001 | 33880851 | 851 CarSat1  | red    | na |
| chrUn | 33880872 | 33882416 | 1545 CarSat1 | red    | na |
| chrUn | 33882483 | 33883013 | 531 CarSat1  | red    | na |
| chrUn | 33883030 | 33885222 | 2193 CarSat1 | red    | na |
| chrUn | 33885227 | 33886736 | 1510 SAT1_CF | blue   | na |
| chrUn | 33886780 | 33887310 | 531 SAT1_CF  | blue   | na |
| chrUn | 33887355 | 33888429 | 1075 SAT1_CF | blue   | na |
| chrUn | 33888444 | 33889269 | 826 SAT1_CF  | blue   | na |
| chrUn | 33889289 | 33891003 | 1715 SAT1_CF | blue   | na |
| chrUn | 33891024 | 33891896 | 873 SAT1_CF  | blue   | na |
| chrUn | 33891909 | 33893043 | 1135 SAT1_CF | blue   | na |
| chrUn | 33893029 | 33893749 | 721 CarSat1  | red    | na |
| chrUn | 33893809 | 33894205 | 397 CarSat1  | red    | na |
| chrUn | 33968916 | 33969877 | 962 Sat7CF   | lime   | na |
| chrUn | 33993562 | 33994351 | 790 Sat7CF   | lime   | na |
| chrUn | 34020824 | 34020961 | 138 SAT1_CF  | blue   | na |
| chrUn | 34021027 | 34022456 | 1430 SAT1_CF | blue   | na |
| chrUn | 34022469 | 34023838 | 1370 SAT1_CF | blue   | na |
| chrUn | 34023881 | 34025835 | 1955 SAT1_CF | blue   | na |
| chrUn | 34025900 | 34026382 | 483 SAT1_CF  | blue   | na |
| chrUn | 34026395 | 34026501 | 107 SAT1_CF  | blue   | na |
| chrUn | 34026524 | 34027764 | 1241 SAT1_CF | blue   | na |
| chrUn | 34027807 | 34028914 | 1108 SAT1_CF | blue   | na |
| chrUn | 34028959 | 34029514 | 556 SAT1_CF  | blue   | na |
| chrUn | 34029548 | 34029786 | 239 SAT1_CF  | blue   | na |
| chrUn | 34029802 | 34030370 | 569 SAT1_CF  | blue   | na |
| chrUn | 34036646 | 34037287 | 642 SAT1_CF  | blue   | na |
| chrUn | 34037299 | 34038152 | 854 SAT1_CF  | blue   | na |
| chrUn | 34038194 | 34038730 | 537 SAT1_CF  | blue   | na |
| chrUn | 34038758 | 34039650 | 893 SAT1_CF  | blue   | na |
| chrUn | 34039696 | 34040678 | 983 SAT1_CF  | blue   | na |
| chrUn | 34040690 | 34041573 | 884 SAT1_CF  | blue   | na |
| chrUn | 34041593 | 34042929 | 1337 SAT1_CF | blue   | na |
| chrUn | 34042975 | 34044197 | 1223 SAT1_CF | blue   | na |
| chrUn | 34044277 | 34044787 | 511 SAT1_CF  | blue   | na |
| chrUn | 34044814 | 34044947 | 134 SAT1_CF  | blue   | na |
| chrUn | 34045005 | 34045505 | 501 SAT1_CF  | blue   | na |
| chrUn | 34045518 | 34047334 | 1817 SAT1_CF | blue   | na |

|       |          |          |              |      |    |
|-------|----------|----------|--------------|------|----|
| chrUn | 34047451 | 34047878 | 428 SAT1_CF  | blue | na |
| chrUn | 34047891 | 34048496 | 606 SAT1_CF  | blue | na |
| chrUn | 34048539 | 34049087 | 549 SAT1_CF  | blue | na |
| chrUn | 34049164 | 34049710 | 547 SAT1_CF  | blue | na |
| chrUn | 34049834 | 34050985 | 1152 SAT1_CF | blue | na |
| chrUn | 34051025 | 34051525 | 501 SAT1_CF  | blue | na |
| chrUn | 34051538 | 34051639 | 102 SAT1_CF  | blue | na |
| chrUn | 34051667 | 34052340 | 674 SAT1_CF  | blue | na |
| chrUn | 34052363 | 34052906 | 544 SAT1_CF  | blue | na |
| chrUn | 34052989 | 34053362 | 374 SAT1_CF  | blue | na |
| chrUn | 34053400 | 34053900 | 501 SAT1_CF  | blue | na |
| chrUn | 34053912 | 34054597 | 686 SAT1_CF  | blue | na |
| chrUn | 34054608 | 34055187 | 580 SAT1_CF  | blue | na |
| chrUn | 34055229 | 34057084 | 1856 SAT1_CF | blue | na |
| chrUn | 34057124 | 34057624 | 501 SAT1_CF  | blue | na |
| chrUn | 34057637 | 34058320 | 684 SAT1_CF  | blue | na |
| chrUn | 34058338 | 34059015 | 678 SAT1_CF  | blue | na |
| chrUn | 34059026 | 34061088 | 2063 SAT1_CF | blue | na |
| chrUn | 34061130 | 34061674 | 545 SAT1_CF  | blue | na |
| chrUn | 34061690 | 34062301 | 612 SAT1_CF  | blue | na |
| chrUn | 34062344 | 34062897 | 554 SAT1_CF  | blue | na |
| chrUn | 34062915 | 34063584 | 670 SAT1_CF  | blue | na |
| chrUn | 34063627 | 34064592 | 966 SAT1_CF  | blue | na |
| chrUn | 34064637 | 34065664 | 1028 SAT1_CF | blue | na |
| chrUn | 34065707 | 34066200 | 494 SAT1_CF  | blue | na |
| chrUn | 34066220 | 34066871 | 652 SAT1_CF  | blue | na |
| chrUn | 34066889 | 34067744 | 856 SAT1_CF  | blue | na |
| chrUn | 34067756 | 34069352 | 1597 SAT1_CF | blue | na |
| chrUn | 34069364 | 34071633 | 2270 SAT1_CF | blue | na |
| chrUn | 34071666 | 34072014 | 349 SAT1_CF  | blue | na |
| chrUn | 34072070 | 34072571 | 502 SAT1_CF  | blue | na |
| chrUn | 34072583 | 34073265 | 683 SAT1_CF  | blue | na |
| chrUn | 34073288 | 34075336 | 2049 SAT1_CF | blue | na |
| chrUn | 34075379 | 34075880 | 502 SAT1_CF  | blue | na |
| chrUn | 34075893 | 34076572 | 680 SAT1_CF  | blue | na |
| chrUn | 34076596 | 34077256 | 661 SAT1_CF  | blue | na |
| chrUn | 34077304 | 34080110 | 2807 SAT1_CF | blue | na |
| chrUn | 34080124 | 34081718 | 1595 SAT1_CF | blue | na |
| chrUn | 34081769 | 34082331 | 563 SAT1_CF  | blue | na |
| chrUn | 34083744 | 34084311 | 568 SAT1_CF  | blue | na |
| chrUn | 34084357 | 34084850 | 494 SAT1_CF  | blue | na |
| chrUn | 34084880 | 34085552 | 673 SAT1_CF  | blue | na |

|       |          |          |              |      |    |
|-------|----------|----------|--------------|------|----|
| chrUn | 34085564 | 34085673 | 110 SAT1_CF  | blue | na |
| chrUn | 34085693 | 34086239 | 547 SAT1_CF  | blue | na |
| chrUn | 34086283 | 34087394 | 1112 SAT1_CF | blue | na |
| chrUn | 34087437 | 34088022 | 586 SAT1_CF  | blue | na |
| chrUn | 34088034 | 34089261 | 1228 SAT1_CF | blue | na |
| chrUn | 34089348 | 34089849 | 502 SAT1_CF  | blue | na |
| chrUn | 34089863 | 34090546 | 684 SAT1_CF  | blue | na |
| chrUn | 34090558 | 34091241 | 684 SAT1_CF  | blue | na |
| chrUn | 34091252 | 34091744 | 493 SAT1_CF  | blue | na |
| chrUn | 34091758 | 34092482 | 725 SAT1_CF  | blue | na |
| chrUn | 34092494 | 34092564 | 71 SAT1_CF   | blue | na |
| chrUn | 34092589 | 34092736 | 148 SAT1_CF  | blue | na |
| chrUn | 34092763 | 34093734 | 972 SAT1_CF  | blue | na |
| chrUn | 34093808 | 34094182 | 375 SAT1_CF  | blue | na |
| chrUn | 34094218 | 34094805 | 588 SAT1_CF  | blue | na |
| chrUn | 34094861 | 34095375 | 515 SAT1_CF  | blue | na |
| chrUn | 34095388 | 34095480 | 93 SAT1_CF   | blue | na |
| chrUn | 34095491 | 34096477 | 987 SAT1_CF  | blue | na |
| chrUn | 34096503 | 34098007 | 1505 SAT1_CF | blue | na |
| chrUn | 34098052 | 34099215 | 1164 SAT1_CF | blue | na |
| chrUn | 34099227 | 34099737 | 511 SAT1_CF  | blue | na |
| chrUn | 34099817 | 34101802 | 1986 SAT1_CF | blue | na |
| chrUn | 34101848 | 34102349 | 502 SAT1_CF  | blue | na |
| chrUn | 34102362 | 34103732 | 1371 SAT1_CF | blue | na |
| chrUn | 34103774 | 34104677 | 904 SAT1_CF  | blue | na |
| chrUn | 34104728 | 34105275 | 548 SAT1_CF  | blue | na |
| chrUn | 34105392 | 34105902 | 511 SAT1_CF  | blue | na |
| chrUn | 34105929 | 34106062 | 134 SAT1_CF  | blue | na |
| chrUn | 34106120 | 34106620 | 501 SAT1_CF  | blue | na |
| chrUn | 34106633 | 34107317 | 685 SAT1_CF  | blue | na |
| chrUn | 34107329 | 34107438 | 110 SAT1_CF  | blue | na |
| chrUn | 34107458 | 34108004 | 547 SAT1_CF  | blue | na |
| chrUn | 34108017 | 34108237 | 221 SAT1_CF  | blue | na |
| chrUn | 34108265 | 34109326 | 1062 SAT1_CF | blue | na |
| chrUn | 34109353 | 34109487 | 135 SAT1_CF  | blue | na |
| chrUn | 34109545 | 34110046 | 502 SAT1_CF  | blue | na |
| chrUn | 34110058 | 34110741 | 684 SAT1_CF  | blue | na |
| chrUn | 34110753 | 34111249 | 497 SAT1_CF  | blue | na |
| chrUn | 34111289 | 34111837 | 549 SAT1_CF  | blue | na |
| chrUn | 34112281 | 34114139 | 1859 SAT1_CF | blue | na |
| chrUn | 34114204 | 34116024 | 1821 SAT1_CF | blue | na |
| chrUn | 34116067 | 34116607 | 541 SAT1_CF  | blue | na |

|       |          |          |              |        |    |
|-------|----------|----------|--------------|--------|----|
| chrUn | 34116627 | 34117341 | 715 SAT1_CF  | blue   | na |
| chrUn | 34117420 | 34117944 | 525 SAT1_CF  | blue   | na |
| chrUn | 34117998 | 34118076 | 79 SAT1_CF   | blue   | na |
| chrUn | 34118134 | 34118634 | 501 SAT1_CF  | blue   | na |
| chrUn | 34118645 | 34119331 | 687 SAT1_CF  | blue   | na |
| chrUn | 34119343 | 34120017 | 675 SAT1_CF  | blue   | na |
| chrUn | 34120060 | 34120448 | 389 SAT1_CF  | blue   | na |
| chrUn | 34224205 | 34225834 | 1630 CarSat1 | red    | na |
| chrUn | 34225864 | 34231989 | 6126 CarSat1 | red    | na |
| chrUn | 34232000 | 34232975 | 976 CarSat1  | red    | na |
| chrUn | 34232999 | 34233711 | 713 CarSat1  | red    | na |
| chrUn | 34233744 | 34234449 | 706 CarSat1  | red    | na |
| chrUn | 34234473 | 34236141 | 1669 CarSat1 | red    | na |
| chrUn | 34236171 | 34236657 | 487 CarSat1  | red    | na |
| chrUn | 34236691 | 34237395 | 705 CarSat1  | red    | na |
| chrUn | 34237419 | 34238353 | 935 CarSat1  | red    | na |
| chrUn | 34238383 | 34238869 | 487 CarSat1  | red    | na |
| chrUn | 34238903 | 34239607 | 705 CarSat1  | red    | na |
| chrUn | 34239631 | 34242034 | 2404 CarSat1 | red    | na |
| chrUn | 34242064 | 34246966 | 4903 CarSat1 | red    | na |
| chrUn | 34246990 | 34250649 | 3660 CarSat1 | red    | na |
| chrUn | 34250683 | 34255288 | 4606 CarSat1 | red    | na |
| chrUn | 34255318 | 34256539 | 1222 CarSat1 | red    | na |
| chrUn | 34256564 | 34262420 | 5857 CarSat1 | red    | na |
| chrUn | 34262444 | 34262911 | 468 CarSat1  | red    | na |
| chrUn | 34262937 | 34264850 | 1914 CarSat1 | red    | na |
| chrUn | 34264880 | 34266102 | 1223 CarSat1 | red    | na |
| chrUn | 34266124 | 34270006 | 3883 CarSat1 | red    | na |
| chrUn | 34270036 | 34270744 | 709 CarSat1  | red    | na |
| chrUn | 34270759 | 34270885 | 127 Carsat2  | orange | na |
| chrUn | 34270774 | 34276919 | 6146 CarSat1 | red    | na |
| chrUn | 34276948 | 34277647 | 700 CarSat1  | red    | na |
| chrUn | 34277684 | 34278661 | 978 CarSat1  | red    | na |
| chrUn | 34278698 | 34279126 | 429 CarSat1  | red    | na |
| chrUn | 34279141 | 34279249 | 109 Carsat2  | orange | na |
| chrUn | 34279156 | 34286444 | 7289 CarSat1 | red    | na |
| chrUn | 34287205 | 34289437 | 2233 CarSat1 | red    | na |
| chrUn | 34289467 | 34290170 | 704 CarSat1  | red    | na |
| chrUn | 34290201 | 34290903 | 703 CarSat1  | red    | na |
| chrUn | 34290933 | 34291760 | 828 CarSat1  | red    | na |
| chrUn | 34291945 | 34292579 | 635 CarSat1  | red    | na |
| chrUn | 34292612 | 34293307 | 696 CarSat1  | red    | na |

|       |          |          |      |         |        |    |
|-------|----------|----------|------|---------|--------|----|
| chrUn | 34293323 | 34294044 | 722  | CarSat1 | red    | na |
| chrUn | 34294073 | 34294990 | 918  | CarSat1 | red    | na |
| chrUn | 34295020 | 34296163 | 1144 | CarSat1 | red    | na |
| chrUn | 34303887 | 34305042 | 1156 | Sat2CF  | purple | na |
| chrUn | 34319830 | 34321046 | 1217 | Sat2CF  | purple | na |
| chrUn | 34319958 | 34321041 | 1084 | Sat2CF  | purple | na |
| chrUn | 34323237 | 34323663 | 427  | CarSat1 | red    | na |
| chrUn | 34323697 | 34324418 | 722  | CarSat1 | red    | na |
| chrUn | 34324404 | 34325562 | 1159 | SAT1_CF | blue   | na |
| chrUn | 34325584 | 34325985 | 402  | SAT1_CF | blue   | na |
| chrUn | 34325999 | 34328044 | 2046 | SAT1_CF | blue   | na |
| chrUn | 34328087 | 34329731 | 1645 | SAT1_CF | blue   | na |
| chrUn | 34329774 | 34330501 | 728  | SAT1_CF | blue   | na |
| chrUn | 34330545 | 34332057 | 1513 | SAT1_CF | blue   | na |
| chrUn | 34332122 | 34332279 | 158  | SAT1_CF | blue   | na |
| chrUn | 34332294 | 34333329 | 1036 | SAT1_CF | blue   | na |
| chrUn | 34333372 | 34334047 | 676  | SAT1_CF | blue   | na |
| chrUn | 34334059 | 34334535 | 477  | SAT1_CF | blue   | na |
| chrUn | 34334600 | 34335216 | 617  | SAT1_CF | blue   | na |
| chrUn | 34335231 | 34336340 | 1110 | SAT1_CF | blue   | na |
| chrUn | 34336352 | 34337471 | 1120 | SAT1_CF | blue   | na |
| chrUn | 34337511 | 34338083 | 573  | SAT1_CF | blue   | na |
| chrUn | 34339499 | 34340061 | 563  | SAT1_CF | blue   | na |
| chrUn | 34340075 | 34340481 | 407  | SAT1_CF | blue   | na |
| chrUn | 34340492 | 34341705 | 1214 | SAT1_CF | blue   | na |
| chrUn | 34341719 | 34342211 | 493  | SAT1_CF | blue   | na |
| chrUn | 34342222 | 34342905 | 684  | SAT1_CF | blue   | na |
| chrUn | 34342917 | 34343600 | 684  | SAT1_CF | blue   | na |
| chrUn | 34343613 | 34346422 | 2810 | SAT1_CF | blue   | na |
| chrUn | 34346499 | 34347361 | 863  | SAT1_CF | blue   | na |
| chrUn | 34347373 | 34347925 | 553  | SAT1_CF | blue   | na |
| chrUn | 34347954 | 34348834 | 881  | SAT1_CF | blue   | na |
| chrUn | 34348868 | 34350243 | 1376 | SAT1_CF | blue   | na |
| chrUn | 34350287 | 34351619 | 1333 | SAT1_CF | blue   | na |
| chrUn | 34351631 | 34352236 | 606  | SAT1_CF | blue   | na |
| chrUn | 34352249 | 34352750 | 502  | SAT1_CF | blue   | na |
| chrUn | 34352817 | 34353954 | 1138 | SAT1_CF | blue   | na |
| chrUn | 34353998 | 34354643 | 646  | SAT1_CF | blue   | na |
| chrUn | 34354656 | 34355176 | 521  | SAT1_CF | blue   | na |
| chrUn | 34355231 | 34355333 | 103  | SAT1_CF | blue   | na |
| chrUn | 34355345 | 34355821 | 477  | SAT1_CF | blue   | na |
| chrUn | 34355842 | 34355951 | 110  | SAT1_CF | blue   | na |

|       |          |          |      |         |      |    |
|-------|----------|----------|------|---------|------|----|
| chrUn | 34355963 | 34357157 | 1195 | SAT1_CF | blue | na |
| chrUn | 34357246 | 34358134 | 889  | SAT1_CF | blue | na |
| chrUn | 34358157 | 34358354 | 198  | SAT1_CF | blue | na |
| chrUn | 34358476 | 34359021 | 546  | SAT1_CF | blue | na |
| chrUn | 34359034 | 34359150 | 117  | SAT1_CF | blue | na |
| chrUn | 34359162 | 34361285 | 2124 | SAT1_CF | blue | na |
| chrUn | 34361297 | 34361981 | 685  | SAT1_CF | blue | na |
| chrUn | 34361993 | 34362494 | 502  | SAT1_CF | blue | na |
| chrUn | 34362538 | 34363493 | 956  | SAT1_CF | blue | na |
| chrUn | 34363538 | 34364537 | 1000 | SAT1_CF | blue | na |
| chrUn | 34364579 | 34365786 | 1208 | SAT1_CF | blue | na |
| chrUn | 34365809 | 34365917 | 109  | SAT1_CF | blue | na |
| chrUn | 34365929 | 34366446 | 518  | SAT1_CF | blue | na |
| chrUn | 34366480 | 34366960 | 481  | SAT1_CF | blue | na |
| chrUn | 34367027 | 34367982 | 956  | SAT1_CF | blue | na |
| chrUn | 34368025 | 34368691 | 667  | SAT1_CF | blue | na |
| chrUn | 34368714 | 34369544 | 831  | SAT1_CF | blue | na |
| chrUn | 34369558 | 34370077 | 520  | SAT1_CF | blue | na |
| chrUn | 34370103 | 34373200 | 3098 | SAT1_CF | blue | na |
| chrUn | 34373221 | 34373434 | 214  | SAT1_CF | blue | na |
| chrUn | 34374094 | 34374482 | 389  | SAT1_CF | blue | na |
| chrUn | 34375899 | 34376461 | 563  | SAT1_CF | blue | na |
| chrUn | 34376475 | 34377430 | 956  | SAT1_CF | blue | na |
| chrUn | 34377509 | 34378464 | 956  | SAT1_CF | blue | na |
| chrUn | 34378507 | 34379048 | 542  | SAT1_CF | blue | na |
| chrUn | 34379270 | 34380100 | 831  | SAT1_CF | blue | na |
| chrUn | 34380114 | 34381787 | 1674 | SAT1_CF | blue | na |
| chrUn | 34381807 | 34381916 | 110  | SAT1_CF | blue | na |
| chrUn | 34381928 | 34382612 | 685  | SAT1_CF | blue | na |
| chrUn | 34382626 | 34383120 | 495  | SAT1_CF | blue | na |
| chrUn | 34383146 | 34384171 | 1026 | SAT1_CF | blue | na |
| chrUn | 34384250 | 34385212 | 963  | SAT1_CF | blue | na |
| chrUn | 34385255 | 34385929 | 675  | SAT1_CF | blue | na |
| chrUn | 34385941 | 34386547 | 607  | SAT1_CF | blue | na |
| chrUn | 34386560 | 34387060 | 501  | SAT1_CF | blue | na |
| chrUn | 34387100 | 34388060 | 961  | SAT1_CF | blue | na |
| chrUn | 34388104 | 34389381 | 1278 | SAT1_CF | blue | na |
| chrUn | 34389394 | 34390247 | 854  | SAT1_CF | blue | na |
| chrUn | 34390259 | 34391054 | 796  | SAT1_CF | blue | na |
| chrUn | 34391068 | 34391228 | 161  | SAT1_CF | blue | na |
| chrUn | 34391244 | 34392687 | 1444 | SAT1_CF | blue | na |
| chrUn | 34392698 | 34393359 | 662  | SAT1_CF | blue | na |



|       |          |          |              |        |    |
|-------|----------|----------|--------------|--------|----|
| chrUn | 34393399 | 34393892 | 494 SAT1_CF  | blue   | na |
| chrUn | 34393932 | 34394888 | 957 SAT1_CF  | blue   | na |
| chrUn | 34394971 | 34395725 | 755 SAT1_CF  | blue   | na |
| chrUn | 34395795 | 34397153 | 1359 SAT1_CF | blue   | na |
| chrUn | 34397186 | 34398932 | 1747 SAT1_CF | blue   | na |
| chrUn | 34398946 | 34399447 | 502 SAT1_CF  | blue   | na |
| chrUn | 34399523 | 34401033 | 1511 SAT1_CF | blue   | na |
| chrUn | 34401045 | 34402803 | 1759 SAT1_CF | blue   | na |
| chrUn | 34402819 | 34404068 | 1250 SAT1_CF | blue   | na |
| chrUn | 34404087 | 34404696 | 610 SAT1_CF  | blue   | na |
| chrUn | 34404717 | 34405118 | 402 SAT1_CF  | blue   | na |
| chrUn | 34405129 | 34406238 | 1110 SAT1_CF | blue   | na |
| chrUn | 34406254 | 34406794 | 541 SAT1_CF  | blue   | na |
| chrUn | 34406836 | 34407511 | 676 SAT1_CF  | blue   | na |
| chrUn | 34407523 | 34408205 | 683 SAT1_CF  | blue   | na |
| chrUn | 34408218 | 34409641 | 1424 SAT1_CF | blue   | na |
| chrUn | 34409654 | 34410723 | 1070 SAT1_CF | blue   | na |
| chrUn | 34410765 | 34411926 | 1162 SAT1_CF | blue   | na |
| chrUn | 34411972 | 34412976 | 1005 SAT1_CF | blue   | na |
| chrUn | 34413042 | 34414006 | 965 SAT1_CF  | blue   | na |
| chrUn | 34414049 | 34414724 | 676 SAT1_CF  | blue   | na |
| chrUn | 34414736 | 34415892 | 1157 SAT1_CF | blue   | na |
| chrUn | 34415905 | 34416916 | 1012 SAT1_CF | blue   | na |
| chrUn | 34521941 | 34523272 | 1332 SAT1_CF | blue   | na |
| chrUn | 34523310 | 34523860 | 551 SAT1_CF  | blue   | na |
| chrUn | 34523901 | 34524645 | 745 SAT1_CF  | blue   | na |
| chrUn | 34524667 | 34525290 | 624 SAT1_CF  | blue   | na |
| chrUn | 34525330 | 34526275 | 946 SAT1_CF  | blue   | na |
| chrUn | 34526315 | 34526525 | 211 SAT1_CF  | blue   | na |
| chrUn | 34526567 | 34528412 | 1846 SAT1_CF | blue   | na |
| chrUn | 34528417 | 34529586 | 1170 CarSat1 | red    | na |
| chrUn | 34529775 | 34530540 | 766 CarSat1  | red    | na |
| chrUn | 34530558 | 34531332 | 775 CarSat1  | red    | na |
| chrUn | 34531353 | 34532943 | 1591 CarSat1 | red    | na |
| chrUn | 34533043 | 34533819 | 777 CarSat1  | red    | na |
| chrUn | 34533840 | 34534364 | 525 CarSat1  | red    | na |
| chrUn | 34534764 | 34535932 | 1169 Sat2CF  | purple | na |
| chrUn | 34535824 | 34536001 | 178 Sat2CF   | purple | na |
| chrUn | 34546445 | 34546811 | 367 Sat2CF   | purple | na |
| chrUn | 34546451 | 34546923 | 473 Sat2CF   | purple | na |
| chrUn | 34546526 | 34546870 | 345 Sat2CF   | purple | na |
| chrUn | 34558697 | 34559639 | 943 Sat2CF   | purple | na |

|       |          |          |              |        |    |
|-------|----------|----------|--------------|--------|----|
| chrUn | 34558843 | 34559780 | 938 Sat2CF   | purple | na |
| chrUn | 34567855 | 34569157 | 1303 CarSat1 | red    | na |
| chrUn | 34569178 | 34570029 | 852 CarSat1  | red    | na |
| chrUn | 34570050 | 34571290 | 1241 CarSat1 | red    | na |
| chrUn | 34571328 | 34572209 | 882 CarSat1  | red    | na |
| chrUn | 34572204 | 34573412 | 1209 SAT1_CF | blue   | na |
| chrUn | 34573442 | 34575025 | 1584 SAT1_CF | blue   | na |
| chrUn | 34575041 | 34575260 | 220 SAT1_CF  | blue   | na |
| chrUn | 34575275 | 34576506 | 1232 SAT1_CF | blue   | na |
| chrUn | 34576519 | 34577061 | 543 SAT1_CF  | blue   | na |
| chrUn | 34577386 | 34577541 | 156 SAT1_CF  | blue   | na |
| chrUn | 34577585 | 34578103 | 519 SAT1_CF  | blue   | na |
| chrUn | 34584459 | 34586402 | 1944 SAT1_CF | blue   | na |
| chrUn | 34586430 | 34586942 | 513 SAT1_CF  | blue   | na |
| chrUn | 34587020 | 34587569 | 550 SAT1_CF  | blue   | na |
| chrUn | 34587612 | 34588654 | 1043 SAT1_CF | blue   | na |
| chrUn | 34588698 | 34590087 | 1390 SAT1_CF | blue   | na |
| chrUn | 34590141 | 34590629 | 489 SAT1_CF  | blue   | na |
| chrUn | 34590658 | 34590876 | 219 SAT1_CF  | blue   | na |
| chrUn | 34590893 | 34592867 | 1975 SAT1_CF | blue   | na |
| chrUn | 34592872 | 34595588 | 2717 CarSat1 | red    | na |
| chrUn | 34595607 | 34596564 | 958 CarSat1  | red    | na |
| chrUn | 34618453 | 34619528 | 1076 SAT1_CF | blue   | na |
| chrUn | 34619572 | 34620759 | 1188 SAT1_CF | blue   | na |
| chrUn | 34620802 | 34621528 | 727 SAT1_CF  | blue   | na |
| chrUn | 34621573 | 34622107 | 535 SAT1_CF  | blue   | na |
| chrUn | 34622129 | 34622646 | 518 SAT1_CF  | blue   | na |
| chrUn | 34622658 | 34623975 | 1318 SAT1_CF | blue   | na |
| chrUn | 34623988 | 34624823 | 836 SAT1_CF  | blue   | na |
| chrUn | 34624836 | 34625539 | 704 SAT1_CF  | blue   | na |
| chrUn | 34625551 | 34626228 | 678 SAT1_CF  | blue   | na |
| chrUn | 34626271 | 34628092 | 1822 SAT1_CF | blue   | na |
| chrUn | 34628132 | 34628634 | 503 SAT1_CF  | blue   | na |
| chrUn | 34628646 | 34629835 | 1190 SAT1_CF | blue   | na |
| chrUn | 34629848 | 34630456 | 609 SAT1_CF  | blue   | na |
| chrUn | 34630504 | 34631051 | 548 SAT1_CF  | blue   | na |
| chrUn | 34633900 | 34634610 | 711 SAT1_CF  | blue   | na |
| chrUn | 34634622 | 34635299 | 678 SAT1_CF  | blue   | na |
| chrUn | 34635342 | 34635883 | 542 SAT1_CF  | blue   | na |
| chrUn | 34635897 | 34637194 | 1298 SAT1_CF | blue   | na |
| chrUn | 34637222 | 34637924 | 703 SAT1_CF  | blue   | na |
| chrUn | 34637937 | 34639161 | 1225 SAT1_CF | blue   | na |

|       |          |          |              |      |    |
|-------|----------|----------|--------------|------|----|
| chrUn | 34639222 | 34639969 | 748 SAT1_CF  | blue | na |
| chrUn | 34639984 | 34640120 | 137 SAT1_CF  | blue | na |
| chrUn | 34640186 | 34640736 | 551 SAT1_CF  | blue | na |
| chrUn | 34640763 | 34641306 | 544 SAT1_CF  | blue | na |
| chrUn | 34641348 | 34641526 | 179 SAT1_CF  | blue | na |
| chrUn | 34641574 | 34642535 | 962 SAT1_CF  | blue | na |
| chrUn | 34642603 | 34643121 | 519 SAT1_CF  | blue | na |
| chrUn | 34643134 | 34643817 | 684 SAT1_CF  | blue | na |
| chrUn | 34643829 | 34644674 | 846 SAT1_CF  | blue | na |
| chrUn | 34644715 | 34645826 | 1112 SAT1_CF | blue | na |
| chrUn | 34645867 | 34646379 | 513 SAT1_CF  | blue | na |
| chrUn | 34646407 | 34647106 | 700 SAT1_CF  | blue | na |
| chrUn | 34647119 | 34647800 | 682 SAT1_CF  | blue | na |
| chrUn | 34647814 | 34648674 | 861 SAT1_CF  | blue | na |
| chrUn | 34648716 | 34649261 | 546 SAT1_CF  | blue | na |
| chrUn | 34649303 | 34649504 | 202 SAT1_CF  | blue | na |
| chrUn | 34649685 | 34649870 | 186 SAT1_CF  | blue | na |
| chrUn | 34649906 | 34650405 | 500 SAT1_CF  | blue | na |
| chrUn | 34650418 | 34650525 | 108 SAT1_CF  | blue | na |
| chrUn | 34650546 | 34651528 | 983 SAT1_CF  | blue | na |
| chrUn | 34651615 | 34652797 | 1183 SAT1_CF | blue | na |
| chrUn | 34652820 | 34653770 | 951 SAT1_CF  | blue | na |
| chrUn | 34653798 | 34656428 | 2631 SAT1_CF | blue | na |
| chrUn | 34656471 | 34657319 | 849 SAT1_CF  | blue | na |
| chrUn | 34657339 | 34657861 | 523 SAT1_CF  | blue | na |
| chrUn | 34657874 | 34658557 | 684 SAT1_CF  | blue | na |
| chrUn | 34658569 | 34659371 | 803 SAT1_CF  | blue | na |
| chrUn | 34659394 | 34660608 | 1215 SAT1_CF | blue | na |
| chrUn | 34660684 | 34661225 | 542 SAT1_CF  | blue | na |
| chrUn | 34661236 | 34661348 | 113 SAT1_CF  | blue | na |
| chrUn | 34661362 | 34662055 | 694 SAT1_CF  | blue | na |
| chrUn | 34662066 | 34662469 | 404 SAT1_CF  | blue | na |
| chrUn | 34662488 | 34663006 | 519 SAT1_CF  | blue | na |
| chrUn | 34663019 | 34663703 | 685 SAT1_CF  | blue | na |
| chrUn | 34663715 | 34665055 | 1341 SAT1_CF | blue | na |
| chrUn | 34665073 | 34665750 | 678 SAT1_CF  | blue | na |
| chrUn | 34665762 | 34665871 | 110 SAT1_CF  | blue | na |
| chrUn | 34665892 | 34666365 | 474 SAT1_CF  | blue | na |
| chrUn | 34666392 | 34666980 | 589 SAT1_CF  | blue | na |
| chrUn | 34667007 | 34667681 | 675 SAT1_CF  | blue | na |
| chrUn | 34667725 | 34668800 | 1076 SAT1_CF | blue | na |
| chrUn | 34668880 | 34669803 | 924 SAT1_CF  | blue | na |

|       |          |          |              |      |    |
|-------|----------|----------|--------------|------|----|
| chrUn | 34669863 | 34670794 | 932 SAT1_CF  | blue | na |
| chrUn | 34670816 | 34671992 | 1177 SAT1_CF | blue | na |
| chrUn | 34672073 | 34672304 | 232 SAT1_CF  | blue | na |
| chrUn | 34672352 | 34672845 | 494 SAT1_CF  | blue | na |
| chrUn | 34672865 | 34673547 | 683 SAT1_CF  | blue | na |
| chrUn | 34673571 | 34675085 | 1515 SAT1_CF | blue | na |
| chrUn | 34675149 | 34675379 | 231 SAT1_CF  | blue | na |
| chrUn | 34675412 | 34676961 | 1550 SAT1_CF | blue | na |
| chrUn | 34676980 | 34678470 | 1491 SAT1_CF | blue | na |
| chrUn | 34678549 | 34679463 | 915 SAT1_CF  | blue | na |
| chrUn | 34679550 | 34680050 | 501 SAT1_CF  | blue | na |
| chrUn | 34680063 | 34680744 | 682 SAT1_CF  | blue | na |
| chrUn | 34680783 | 34682242 | 1460 SAT1_CF | blue | na |
| chrUn | 34682285 | 34682809 | 525 SAT1_CF  | blue | na |
| chrUn | 34682824 | 34682966 | 143 SAT1_CF  | blue | na |
| chrUn | 34683026 | 34683520 | 495 SAT1_CF  | blue | na |
| chrUn | 34683540 | 34683646 | 107 SAT1_CF  | blue | na |
| chrUn | 34683669 | 34684219 | 551 SAT1_CF  | blue | na |
| chrUn | 34684242 | 34684908 | 667 SAT1_CF  | blue | na |
| chrUn | 34684951 | 34685580 | 630 SAT1_CF  | blue | na |
| chrUn | 34685608 | 34686800 | 1193 SAT1_CF | blue | na |
| chrUn | 34686828 | 34686966 | 139 SAT1_CF  | blue | na |
| chrUn | 34687011 | 34687532 | 522 SAT1_CF  | blue | na |
| chrUn | 34687554 | 34689267 | 1714 SAT1_CF | blue | na |
| chrUn | 34689382 | 34689931 | 550 SAT1_CF  | blue | na |
| chrUn | 34689945 | 34691310 | 1366 SAT1_CF | blue | na |
| chrUn | 34691410 | 34692533 | 1124 SAT1_CF | blue | na |
| chrUn | 34692555 | 34693217 | 663 SAT1_CF  | blue | na |
| chrUn | 34693260 | 34694149 | 890 SAT1_CF  | blue | na |
| chrUn | 34694163 | 34695755 | 1593 SAT1_CF | blue | na |
| chrUn | 34695767 | 34696621 | 855 SAT1_CF  | blue | na |
| chrUn | 34696634 | 34697979 | 1346 SAT1_CF | blue | na |
| chrUn | 34698076 | 34698623 | 548 SAT1_CF  | blue | na |
| chrUn | 34698669 | 34699633 | 965 SAT1_CF  | blue | na |
| chrUn | 34699646 | 34699752 | 107 SAT1_CF  | blue | na |
| chrUn | 34699775 | 34700348 | 574 SAT1_CF  | blue | na |
| chrUn | 34700360 | 34701122 | 763 SAT1_CF  | blue | na |
| chrUn | 34701136 | 34701206 | 71 SAT1_CF   | blue | na |
| chrUn | 34701229 | 34701781 | 553 SAT1_CF  | blue | na |
| chrUn | 34701793 | 34703122 | 1330 SAT1_CF | blue | na |
| chrUn | 34703166 | 34704552 | 1387 SAT1_CF | blue | na |
| chrUn | 34704588 | 34705088 | 501 SAT1_CF  | blue | na |

|       |          |          |              |      |    |
|-------|----------|----------|--------------|------|----|
| chrUn | 34705133 | 34705785 | 653 SAT1_CF  | blue | na |
| chrUn | 34705797 | 34709119 | 3323 SAT1_CF | blue | na |
| chrUn | 34709161 | 34709326 | 166 SAT1_CF  | blue | na |
| chrUn | 34709508 | 34709693 | 186 SAT1_CF  | blue | na |
| chrUn | 34709710 | 34710230 | 521 SAT1_CF  | blue | na |
| chrUn | 34710257 | 34710495 | 239 SAT1_CF  | blue | na |
| chrUn | 34711496 | 34712382 | 887 SAT1_CF  | blue | na |
| chrUn | 34712394 | 34712933 | 540 SAT1_CF  | blue | na |
| chrUn | 34712977 | 34713634 | 658 SAT1_CF  | blue | na |
| chrUn | 34713678 | 34715284 | 1607 SAT1_CF | blue | na |
| chrUn | 34715302 | 34715415 | 114 SAT1_CF  | blue | na |
| chrUn | 34715427 | 34716272 | 846 SAT1_CF  | blue | na |
| chrUn | 34716303 | 34717895 | 1593 SAT1_CF | blue | na |
| chrUn | 34717939 | 34718615 | 677 SAT1_CF  | blue | na |
| chrUn | 34718627 | 34719147 | 521 SAT1_CF  | blue | na |
| chrUn | 34719168 | 34721188 | 2021 SAT1_CF | blue | na |
| chrUn | 34721219 | 34721739 | 521 SAT1_CF  | blue | na |
| chrUn | 34721856 | 34723664 | 1809 SAT1_CF | blue | na |
| chrUn | 34723706 | 34725158 | 1453 SAT1_CF | blue | na |
| chrUn | 34725169 | 34725854 | 686 SAT1_CF  | blue | na |
| chrUn | 34725866 | 34726547 | 682 SAT1_CF  | blue | na |
| chrUn | 34726561 | 34727226 | 666 SAT1_CF  | blue | na |
| chrUn | 34727241 | 34728642 | 1402 SAT1_CF | blue | na |
| chrUn | 34728654 | 34730401 | 1748 SAT1_CF | blue | na |
| chrUn | 34730413 | 34730972 | 560 SAT1_CF  | blue | na |
| chrUn | 34730992 | 34731100 | 109 SAT1_CF  | blue | na |
| chrUn | 34731113 | 34731633 | 521 SAT1_CF  | blue | na |
| chrUn | 34731650 | 34731835 | 186 SAT1_CF  | blue | na |
| chrUn | 34732016 | 34732180 | 165 SAT1_CF  | blue | na |
| chrUn | 34732222 | 34733658 | 1437 SAT1_CF | blue | na |
| chrUn | 34733682 | 34735547 | 1866 SAT1_CF | blue | na |
| chrUn | 34735559 | 34736061 | 503 SAT1_CF  | blue | na |
| chrUn | 34736147 | 34736321 | 175 SAT1_CF  | blue | na |
| chrUn | 34736433 | 34737679 | 1247 SAT1_CF | blue | na |
| chrUn | 34737691 | 34738242 | 552 SAT1_CF  | blue | na |
| chrUn | 34738264 | 34738336 | 73 SAT1_CF   | blue | na |
| chrUn | 34738349 | 34739277 | 929 SAT1_CF  | blue | na |
| chrUn | 34739289 | 34739972 | 684 SAT1_CF  | blue | na |
| chrUn | 34739984 | 34741142 | 1159 SAT1_CF | blue | na |
| chrUn | 34741208 | 34741344 | 137 SAT1_CF  | blue | na |
| chrUn | 34741372 | 34742564 | 1193 SAT1_CF | blue | na |
| chrUn | 34742592 | 34743221 | 630 SAT1_CF  | blue | na |

|       |          |          |              |      |    |
|-------|----------|----------|--------------|------|----|
| chrUn | 34743264 | 34743930 | 667 SAT1_CF  | blue | na |
| chrUn | 34743953 | 34744635 | 683 SAT1_CF  | blue | na |
| chrUn | 34744655 | 34745149 | 495 SAT1_CF  | blue | na |
| chrUn | 34745189 | 34745762 | 574 SAT1_CF  | blue | na |
| chrUn | 34747160 | 34747754 | 595 SAT1_CF  | blue | na |
| chrUn | 34747803 | 34748448 | 646 SAT1_CF  | blue | na |
| chrUn | 34748490 | 34748802 | 313 SAT1_CF  | blue | na |
| chrUn | 34748844 | 34749344 | 501 SAT1_CF  | blue | na |
| chrUn | 34749384 | 34749783 | 400 SAT1_CF  | blue | na |
| chrUn | 34749794 | 34751421 | 1628 SAT1_CF | blue | na |
| chrUn | 34751464 | 34752136 | 673 SAT1_CF  | blue | na |
| chrUn | 34752150 | 34753651 | 1502 SAT1_CF | blue | na |
| chrUn | 34753730 | 34754687 | 958 SAT1_CF  | blue | na |
| chrUn | 34754735 | 34755410 | 676 SAT1_CF  | blue | na |
| chrUn | 34755422 | 34757364 | 1943 SAT1_CF | blue | na |
| chrUn | 34757408 | 34758536 | 1129 SAT1_CF | blue | na |
| chrUn | 34758548 | 34759221 | 674 SAT1_CF  | blue | na |
| chrUn | 34759242 | 34759743 | 502 SAT1_CF  | blue | na |
| chrUn | 34759788 | 34759945 | 158 SAT1_CF  | blue | na |
| chrUn | 34760010 | 34760558 | 549 SAT1_CF  | blue | na |
| chrUn | 34760618 | 34760796 | 179 SAT1_CF  | blue | na |
| chrUn | 34760838 | 34761382 | 545 SAT1_CF  | blue | na |
| chrUn | 34761425 | 34763089 | 1665 SAT1_CF | blue | na |
| chrUn | 34763131 | 34763678 | 548 SAT1_CF  | blue | na |
| chrUn | 34763735 | 34764689 | 955 SAT1_CF  | blue | na |
| chrUn | 34764734 | 34766181 | 1448 SAT1_CF | blue | na |
| chrUn | 34766223 | 34767083 | 861 SAT1_CF  | blue | na |
| chrUn | 34767095 | 34767629 | 535 SAT1_CF  | blue | na |
| chrUn | 34767679 | 34768469 | 791 SAT1_CF  | blue | na |
| chrUn | 34768512 | 34769372 | 861 SAT1_CF  | blue | na |
| chrUn | 34769384 | 34770757 | 1374 SAT1_CF | blue | na |
| chrUn | 34770784 | 34771285 | 502 SAT1_CF  | blue | na |
| chrUn | 34771331 | 34772022 | 692 SAT1_CF  | blue | na |
| chrUn | 34772040 | 34772700 | 661 SAT1_CF  | blue | na |
| chrUn | 34772728 | 34773353 | 626 SAT1_CF  | blue | na |
| chrUn | 34773401 | 34774077 | 677 SAT1_CF  | blue | na |
| chrUn | 34774089 | 34776154 | 2066 SAT1_CF | blue | na |
| chrUn | 34776197 | 34776741 | 545 SAT1_CF  | blue | na |
| chrUn | 34776763 | 34777514 | 752 SAT1_CF  | blue | na |
| chrUn | 34777535 | 34777644 | 110 SAT1_CF  | blue | na |
| chrUn | 34777656 | 34778158 | 503 SAT1_CF  | blue | na |
| chrUn | 34778244 | 34779574 | 1331 SAT1_CF | blue | na |

|       |          |          |      |         |      |    |
|-------|----------|----------|------|---------|------|----|
| chrUn | 34779618 | 34780949 | 1332 | SAT1_CF | blue | na |
| chrUn | 34780961 | 34781514 | 554  | SAT1_CF | blue | na |
| chrUn | 34781539 | 34781643 | 105  | SAT1_CF | blue | na |
| chrUn | 34781656 | 34782156 | 501  | SAT1_CF | blue | na |
| chrUn | 34782196 | 34782597 | 402  | SAT1_CF | blue | na |
| chrUn | 34782608 | 34783893 | 1286 | SAT1_CF | blue | na |
| chrUn | 34783950 | 34784022 | 73   | SAT1_CF | blue | na |
| chrUn | 34784034 | 34784536 | 503  | SAT1_CF | blue | na |
| chrUn | 34784549 | 34785496 | 948  | SAT1_CF | blue | na |
| chrUn | 34785577 | 34786574 | 998  | SAT1_CF | blue | na |
| chrUn | 34786619 | 34787164 | 546  | SAT1_CF | blue | na |
| chrUn | 34787184 | 34787292 | 109  | SAT1_CF | blue | na |
| chrUn | 34787304 | 34787910 | 607  | SAT1_CF | blue | na |
| chrUn | 34787923 | 34789628 | 1706 | SAT1_CF | blue | na |
| chrUn | 34789672 | 34790315 | 644  | SAT1_CF | blue | na |
| chrUn | 34790328 | 34791570 | 1243 | SAT1_CF | blue | na |
| chrUn | 34791026 | 34793996 | 2971 | SAT1_CF | blue | na |
| chrUn | 34794030 | 34795663 | 1634 | SAT1_CF | blue | na |
| chrUn | 34795723 | 34797578 | 1856 | SAT1_CF | blue | na |
| chrUn | 34797621 | 34798295 | 675  | SAT1_CF | blue | na |
| chrUn | 34798308 | 34798809 | 502  | SAT1_CF | blue | na |
| chrUn | 34798845 | 34799244 | 400  | SAT1_CF | blue | na |
| chrUn | 34897708 | 34898288 | 581  | SAT1_CF | blue | na |
| chrUn | 34898301 | 34899892 | 1592 | SAT1_CF | blue | na |
| chrUn | 34899905 | 34900425 | 521  | SAT1_CF | blue | na |
| chrUn | 34900446 | 34901418 | 973  | SAT1_CF | blue | na |
| chrUn | 34901441 | 34902435 | 995  | SAT1_CF | blue | na |
| chrUn | 34902478 | 34903153 | 676  | SAT1_CF | blue | na |
| chrUn | 34903165 | 34903778 | 614  | SAT1_CF | blue | na |
| chrUn | 34903791 | 34904290 | 500  | SAT1_CF | blue | na |
| chrUn | 34904330 | 34904511 | 182  | SAT1_CF | blue | na |
| chrUn | 34904692 | 34905483 | 792  | SAT1_CF | blue | na |
| chrUn | 34905527 | 34906673 | 1147 | SAT1_CF | blue | na |
| chrUn | 34906697 | 34907458 | 762  | SAT1_CF | blue | na |
| chrUn | 34907471 | 34907973 | 503  | SAT1_CF | blue | na |
| chrUn | 34908009 | 34908194 | 186  | SAT1_CF | blue | na |
| chrUn | 34908374 | 34909208 | 835  | SAT1_CF | blue | na |
| chrUn | 34909220 | 34909903 | 684  | SAT1_CF | blue | na |
| chrUn | 34909917 | 34910416 | 500  | SAT1_CF | blue | na |
| chrUn | 34910453 | 34910824 | 372  | SAT1_CF | blue | na |
| chrUn | 34910871 | 34911414 | 544  | SAT1_CF | blue | na |
| chrUn | 34911455 | 34911799 | 345  | SAT1_CF | blue | na |

|       |          |          |      |         |      |    |
|-------|----------|----------|------|---------|------|----|
| chrUn | 34911842 | 34913176 | 1335 | SAT1_CF | blue | na |
| chrUn | 34913188 | 34913944 | 757  | SAT1_CF | blue | na |
| chrUn | 34913971 | 34915098 | 1128 | SAT1_CF | blue | na |
| chrUn | 34915115 | 34915488 | 374  | SAT1_CF | blue | na |
| chrUn | 34915531 | 34916053 | 523  | SAT1_CF | blue | na |
| chrUn | 34916085 | 34917157 | 1073 | SAT1_CF | blue | na |
| chrUn | 34917200 | 34917744 | 545  | SAT1_CF | blue | na |
| chrUn | 34917800 | 34918467 | 668  | SAT1_CF | blue | na |
| chrUn | 34918479 | 34919109 | 631  | SAT1_CF | blue | na |
| chrUn | 34919130 | 34919239 | 110  | SAT1_CF | blue | na |
| chrUn | 34919251 | 34919753 | 503  | SAT1_CF | blue | na |
| chrUn | 34919793 | 34921275 | 1483 | SAT1_CF | blue | na |
| chrUn | 34921292 | 34922645 | 1354 | SAT1_CF | blue | na |
| chrUn | 34922659 | 34923419 | 761  | SAT1_CF | blue | na |
| chrUn | 34923431 | 34924112 | 682  | SAT1_CF | blue | na |
| chrUn | 34924125 | 34924626 | 502  | SAT1_CF | blue | na |
| chrUn | 34924670 | 34924827 | 158  | SAT1_CF | blue | na |
| chrUn | 34924855 | 34925367 | 513  | SAT1_CF | blue | na |
| chrUn | 34925410 | 34926745 | 1336 | SAT1_CF | blue | na |
| chrUn | 34926792 | 34926929 | 138  | SAT1_CF | blue | na |
| chrUn | 34926956 | 34927467 | 512  | SAT1_CF | blue | na |
| chrUn | 34927485 | 34928806 | 1322 | SAT1_CF | blue | na |
| chrUn | 34928849 | 34929524 | 676  | SAT1_CF | blue | na |
| chrUn | 34929536 | 34930168 | 633  | SAT1_CF | blue | na |
| chrUn | 34930190 | 34930293 | 104  | SAT1_CF | blue | na |
| chrUn | 34930311 | 34930812 | 502  | SAT1_CF | blue | na |
| chrUn | 34931007 | 34931408 | 402  | SAT1_CF | blue | na |
| chrUn | 34931419 | 34933703 | 2285 | SAT1_CF | blue | na |
| chrUn | 34933773 | 34934625 | 853  | SAT1_CF | blue | na |
| chrUn | 34934666 | 34935168 | 503  | SAT1_CF | blue | na |
| chrUn | 34935224 | 34935599 | 376  | SAT1_CF | blue | na |
| chrUn | 34935635 | 34936544 | 910  | SAT1_CF | blue | na |
| chrUn | 34936556 | 34937589 | 1034 | SAT1_CF | blue | na |
| chrUn | 34937615 | 34938119 | 505  | SAT1_CF | blue | na |
| chrUn | 34938196 | 34939346 | 1151 | SAT1_CF | blue | na |
| chrUn | 34939364 | 34939861 | 498  | SAT1_CF | blue | na |
| chrUn | 34939909 | 34940860 | 952  | SAT1_CF | blue | na |
| chrUn | 34940891 | 34941787 | 897  | SAT1_CF | blue | na |
| chrUn | 34941829 | 34942685 | 857  | SAT1_CF | blue | na |
| chrUn | 34942697 | 34943239 | 543  | SAT1_CF | blue | na |
| chrUn | 34943276 | 34943493 | 218  | SAT1_CF | blue | na |
| chrUn | 34943544 | 34944182 | 639  | SAT1_CF | blue | na |



|       |          |          |      |         |      |    |
|-------|----------|----------|------|---------|------|----|
| chrUn | 34944194 | 34944901 | 708  | SAT1_CF | blue | na |
| chrUn | 34944970 | 34946550 | 1581 | SAT1_CF | blue | na |
| chrUn | 34946593 | 34947135 | 543  | SAT1_CF | blue | na |
| chrUn | 34947147 | 34947256 | 110  | SAT1_CF | blue | na |
| chrUn | 34947276 | 34948479 | 1204 | SAT1_CF | blue | na |
| chrUn | 34948523 | 34949010 | 488  | SAT1_CF | blue | na |
| chrUn | 34949023 | 34949524 | 502  | SAT1_CF | blue | na |
| chrUn | 34949537 | 34950220 | 684  | SAT1_CF | blue | na |
| chrUn | 34950232 | 34950903 | 672  | SAT1_CF | blue | na |
| chrUn | 34950930 | 34951662 | 733  | SAT1_CF | blue | na |
| chrUn | 34951742 | 34952321 | 580  | SAT1_CF | blue | na |
| chrUn | 34952348 | 34952438 | 91   | SAT1_CF | blue | na |
| chrUn | 34952462 | 34953701 | 1240 | SAT1_CF | blue | na |
| chrUn | 34953744 | 34954706 | 963  | SAT1_CF | blue | na |
| chrUn | 34954732 | 34955559 | 828  | SAT1_CF | blue | na |
| chrUn | 34955604 | 34956105 | 502  | SAT1_CF | blue | na |
| chrUn | 34956117 | 34956225 | 109  | SAT1_CF | blue | na |
| chrUn | 34956248 | 34956836 | 589  | SAT1_CF | blue | na |
| chrUn | 34957420 | 34957860 | 441  | SAT1_CF | blue | na |
| chrUn | 34957873 | 34958374 | 502  | SAT1_CF | blue | na |
| chrUn | 34958387 | 34958992 | 606  | SAT1_CF | blue | na |
| chrUn | 34960387 | 34960949 | 563  | SAT1_CF | blue | na |
| chrUn | 34960963 | 34962594 | 1632 | SAT1_CF | blue | na |
| chrUn | 34962608 | 34962875 | 268  | SAT1_CF | blue | na |
| chrUn | 34962902 | 34963481 | 580  | SAT1_CF | blue | na |
| chrUn | 34963551 | 34964040 | 490  | SAT1_CF | blue | na |
| chrUn | 34964120 | 34965017 | 898  | SAT1_CF | blue | na |
| chrUn | 34965075 | 34965153 | 79   | SAT1_CF | blue | na |
| chrUn | 34965207 | 34965730 | 524  | SAT1_CF | blue | na |
| chrUn | 34965809 | 34966345 | 537  | SAT1_CF | blue | na |
| chrUn | 34966414 | 34967053 | 640  | SAT1_CF | blue | na |
| chrUn | 34967066 | 34967734 | 669  | SAT1_CF | blue | na |
| chrUn | 34967752 | 34968307 | 556  | SAT1_CF | blue | na |
| chrUn | 34968329 | 34968435 | 107  | SAT1_CF | blue | na |
| chrUn | 34968448 | 34968953 | 506  | SAT1_CF | blue | na |
| chrUn | 34969013 | 34969155 | 143  | SAT1_CF | blue | na |
| chrUn | 34969170 | 34970781 | 1612 | SAT1_CF | blue | na |
| chrUn | 34970802 | 34971535 | 734  | SAT1_CF | blue | na |
| chrUn | 34971644 | 34973132 | 1489 | SAT1_CF | blue | na |
| chrUn | 34973158 | 34973660 | 503  | SAT1_CF | blue | na |
| chrUn | 34973685 | 34973755 | 71   | SAT1_CF | blue | na |
| chrUn | 34973767 | 34974487 | 721  | SAT1_CF | blue | na |

|       |          |          |      |         |      |    |
|-------|----------|----------|------|---------|------|----|
| chrUn | 34974501 | 34975392 | 892  | SAT1_CF | blue | na |
| chrUn | 34975404 | 34976431 | 1028 | SAT1_CF | blue | na |
| chrUn | 34976451 | 34976559 | 109  | SAT1_CF | blue | na |
| chrUn | 34976571 | 34977172 | 602  | SAT1_CF | blue | na |
| chrUn | 34977189 | 34977903 | 715  | SAT1_CF | blue | na |
| chrUn | 34977915 | 34979606 | 1692 | SAT1_CF | blue | na |
| chrUn | 34979649 | 34980319 | 671  | SAT1_CF | blue | na |
| chrUn | 34980337 | 34980890 | 554  | SAT1_CF | blue | na |
| chrUn | 34980915 | 34981019 | 105  | SAT1_CF | blue | na |
| chrUn | 34981039 | 34981549 | 511  | SAT1_CF | blue | na |
| chrUn | 34981577 | 34981734 | 158  | SAT1_CF | blue | na |
| chrUn | 34981762 | 34982658 | 897  | SAT1_CF | blue | na |
| chrUn | 34982696 | 34984238 | 1543 | SAT1_CF | blue | na |
| chrUn | 35183213 | 35184505 | 1293 | SAT1_CF | blue | na |
| chrUn | 35184518 | 35185036 | 519  | SAT1_CF | blue | na |
| chrUn | 35185065 | 35186160 | 1096 | SAT1_CF | blue | na |
| chrUn | 35186353 | 35187156 | 804  | SAT1_CF | blue | na |
| chrUn | 35187200 | 35188527 | 1328 | SAT1_CF | blue | na |
| chrUn | 35188539 | 35189209 | 671  | SAT1_CF | blue | na |
| chrUn | 35189232 | 35190123 | 892  | SAT1_CF | blue | na |
| chrUn | 35190135 | 35191519 | 1385 | SAT1_CF | blue | na |
| chrUn | 35191553 | 35192039 | 487  | SAT1_CF | blue | na |
| chrUn | 35192052 | 35192558 | 507  | SAT1_CF | blue | na |
| chrUn | 35192638 | 35193313 | 676  | SAT1_CF | blue | na |
| chrUn | 35193326 | 35193845 | 520  | SAT1_CF | blue | na |
| chrUn | 35193892 | 35194027 | 136  | SAT1_CF | blue | na |
| chrUn | 35194055 | 35195495 | 1441 | SAT1_CF | blue | na |
| chrUn | 35195510 | 35197273 | 1764 | SAT1_CF | blue | na |
| chrUn | 35197286 | 35198677 | 1392 | SAT1_CF | blue | na |
| chrUn | 35198704 | 35199376 | 673  | SAT1_CF | blue | na |
| chrUn | 35199388 | 35200071 | 684  | SAT1_CF | blue | na |
| chrUn | 35200084 | 35200584 | 501  | SAT1_CF | blue | na |
| chrUn | 35200597 | 35202331 | 1735 | SAT1_CF | blue | na |
| chrUn | 35202351 | 35202460 | 110  | SAT1_CF | blue | na |
| chrUn | 35202472 | 35203014 | 543  | SAT1_CF | blue | na |
| chrUn | 35203057 | 35203955 | 899  | SAT1_CF | blue | na |
| chrUn | 35203967 | 35205706 | 1740 | SAT1_CF | blue | na |
| chrUn | 35205749 | 35207118 | 1370 | SAT1_CF | blue | na |
| chrUn | 35207131 | 35209664 | 2534 | SAT1_CF | blue | na |
| chrUn | 35209707 | 35210381 | 675  | SAT1_CF | blue | na |
| chrUn | 35210393 | 35210997 | 605  | SAT1_CF | blue | na |
| chrUn | 35211010 | 35211510 | 501  | SAT1_CF | blue | na |

|       |          |          |              |      |    |
|-------|----------|----------|--------------|------|----|
| chrUn | 35211557 | 35215872 | 4316 SAT1_CF | blue | na |
| chrUn | 35215917 | 35216456 | 540 SAT1_CF  | blue | na |
| chrUn | 35216467 | 35217160 | 694 SAT1_CF  | blue | na |
| chrUn | 35217241 | 35217787 | 547 SAT1_CF  | blue | na |
| chrUn | 35217810 | 35218987 | 1178 SAT1_CF | blue | na |
| chrUn | 35219007 | 35219550 | 544 SAT1_CF  | blue | na |
| chrUn | 35219561 | 35220734 | 1174 SAT1_CF | blue | na |
| chrUn | 35220757 | 35221438 | 682 SAT1_CF  | blue | na |
| chrUn | 35221451 | 35221953 | 503 SAT1_CF  | blue | na |
| chrUn | 35222009 | 35222901 | 893 SAT1_CF  | blue | na |
| chrUn | 35223017 | 35223970 | 954 SAT1_CF  | blue | na |
| chrUn | 35224013 | 35224690 | 678 SAT1_CF  | blue | na |
| chrUn | 35224702 | 35225200 | 499 SAT1_CF  | blue | na |
| chrUn | 35225245 | 35225423 | 179 SAT1_CF  | blue | na |
| chrUn | 35225454 | 35227125 | 1672 SAT1_CF | blue | na |
| chrUn | 35227167 | 35228026 | 860 SAT1_CF  | blue | na |
| chrUn | 35228038 | 35228711 | 674 SAT1_CF  | blue | na |
| chrUn | 35228733 | 35229458 | 726 SAT1_CF  | blue | na |
| chrUn | 35229470 | 35229990 | 521 SAT1_CF  | blue | na |
| chrUn | 35230017 | 35232490 | 2474 SAT1_CF | blue | na |
| chrUn | 35232535 | 35232692 | 158 SAT1_CF  | blue | na |
| chrUn | 35232724 | 35233229 | 506 SAT1_CF  | blue | na |
| chrUn | 35233261 | 35234302 | 1042 SAT1_CF | blue | na |
| chrUn | 35234345 | 35234956 | 612 SAT1_CF  | blue | na |
| chrUn | 35234971 | 35235518 | 548 SAT1_CF  | blue | na |
| chrUn | 35235569 | 35237246 | 1678 SAT1_CF | blue | na |
| chrUn | 35237259 | 35237759 | 501 SAT1_CF  | blue | na |
| chrUn | 35237815 | 35239829 | 2015 SAT1_CF | blue | na |
| chrUn | 35239876 | 35240553 | 678 SAT1_CF  | blue | na |
| chrUn | 35240565 | 35241242 | 678 SAT1_CF  | blue | na |
| chrUn | 35241261 | 35241762 | 502 SAT1_CF  | blue | na |
| chrUn | 35241849 | 35242188 | 340 SAT1_CF  | blue | na |
| chrUn | 35243604 | 35245047 | 1444 SAT1_CF | blue | na |
| chrUn | 35245090 | 35245763 | 674 SAT1_CF  | blue | na |
| chrUn | 35245775 | 35246380 | 606 SAT1_CF  | blue | na |
| chrUn | 35246392 | 35247810 | 1419 SAT1_CF | blue | na |
| chrUn | 35247837 | 35248456 | 620 SAT1_CF  | blue | na |
| chrUn | 35248504 | 35249745 | 1242 SAT1_CF | blue | na |
| chrUn | 35249765 | 35249864 | 100 SAT1_CF  | blue | na |
| chrUn | 35249886 | 35250404 | 519 SAT1_CF  | blue | na |
| chrUn | 35250425 | 35252495 | 2071 SAT1_CF | blue | na |
| chrUn | 35252538 | 35253213 | 676 SAT1_CF  | blue | na |

|       |          |          |              |      |    |
|-------|----------|----------|--------------|------|----|
| chrUn | 35253225 | 35253828 | 604 SAT1_CF  | blue | na |
| chrUn | 35253840 | 35254393 | 554 SAT1_CF  | blue | na |
| chrUn | 35254421 | 35254522 | 102 SAT1_CF  | blue | na |
| chrUn | 35254535 | 35255034 | 500 SAT1_CF  | blue | na |
| chrUn | 35255079 | 35255863 | 785 SAT1_CF  | blue | na |
| chrUn | 35255876 | 35256376 | 501 SAT1_CF  | blue | na |
| chrUn | 35256429 | 35258454 | 2026 SAT1_CF | blue | na |
| chrUn | 35258497 | 35259868 | 1372 SAT1_CF | blue | na |
| chrUn | 35259882 | 35260401 | 520 SAT1_CF  | blue | na |
| chrUn | 35260445 | 35261578 | 1134 SAT1_CF | blue | na |
| chrUn | 35261589 | 35262903 | 1315 SAT1_CF | blue | na |
| chrUn | 35262925 | 35263031 | 107 SAT1_CF  | blue | na |
| chrUn | 35263044 | 35263570 | 527 SAT1_CF  | blue | na |
| chrUn | 35263627 | 35264927 | 1301 SAT1_CF | blue | na |
| chrUn | 35264939 | 35265147 | 209 SAT1_CF  | blue | na |
| chrUn | 35265160 | 35265762 | 603 SAT1_CF  | blue | na |
| chrUn | 35265775 | 35266458 | 684 SAT1_CF  | blue | na |
| chrUn | 35351001 | 35351212 | 212 SAT1_CF  | blue | na |
| chrUn | 35351226 | 35352385 | 1160 SAT1_CF | blue | na |
| chrUn | 35352455 | 35354529 | 2075 SAT1_CF | blue | na |
| chrUn | 35354552 | 35355154 | 603 SAT1_CF  | blue | na |
| chrUn | 35355199 | 35355356 | 158 SAT1_CF  | blue | na |
| chrUn | 35355388 | 35355892 | 505 SAT1_CF  | blue | na |
| chrUn | 35355924 | 35356420 | 497 SAT1_CF  | blue | na |
| chrUn | 35356487 | 35357258 | 772 SAT1_CF  | blue | na |
| chrUn | 35357300 | 35358149 | 850 SAT1_CF  | blue | na |
| chrUn | 35358172 | 35359769 | 1598 SAT1_CF | blue | na |
| chrUn | 35359781 | 35360872 | 1092 SAT1_CF | blue | na |
| chrUn | 35360926 | 35361556 | 631 SAT1_CF  | blue | na |
| chrUn | 35361599 | 35362264 | 666 SAT1_CF  | blue | na |
| chrUn | 35362286 | 35362893 | 608 SAT1_CF  | blue | na |
| chrUn | 35362905 | 35363388 | 484 SAT1_CF  | blue | na |
| chrUn | 35363408 | 35363668 | 261 SAT1_CF  | blue | na |
| chrUn | 35363707 | 35363869 | 163 SAT1_CF  | blue | na |
| chrUn | 35363882 | 35364773 | 892 SAT1_CF  | blue | na |
| chrUn | 35364785 | 35366125 | 1341 SAT1_CF | blue | na |
| chrUn | 35366146 | 35368185 | 2040 SAT1_CF | blue | na |
| chrUn | 35368238 | 35369159 | 922 SAT1_CF  | blue | na |
| chrUn | 35369190 | 35370079 | 890 SAT1_CF  | blue | na |
| chrUn | 35370124 | 35370980 | 857 SAT1_CF  | blue | na |
| chrUn | 35370992 | 35371572 | 581 SAT1_CF  | blue | na |
| chrUn | 35371668 | 35371834 | 167 SAT1_CF  | blue | na |

|       |          |          |              |      |    |
|-------|----------|----------|--------------|------|----|
| chrUn | 35371853 | 35372387 | 535 SAT1_CF  | blue | na |
| chrUn | 35372434 | 35372625 | 192 SAT1_CF  | blue | na |
| chrUn | 35372670 | 35373871 | 1202 SAT1_CF | blue | na |
| chrUn | 35373893 | 35374531 | 639 SAT1_CF  | blue | na |
| chrUn | 35374558 | 35377231 | 2674 SAT1_CF | blue | na |
| chrUn | 35377243 | 35378222 | 980 SAT1_CF  | blue | na |
| chrUn | 35378235 | 35378756 | 522 SAT1_CF  | blue | na |
| chrUn | 35378824 | 35379354 | 531 SAT1_CF  | blue | na |
| chrUn | 35380763 | 35382006 | 1244 SAT1_CF | blue | na |
| chrUn | 35382085 | 35384098 | 2014 SAT1_CF | blue | na |
| chrUn | 35384111 | 35384999 | 889 SAT1_CF  | blue | na |
| chrUn | 35385011 | 35387612 | 2602 SAT1_CF | blue | na |
| chrUn | 35387625 | 35388139 | 515 SAT1_CF  | blue | na |
| chrUn | 35388195 | 35388801 | 607 SAT1_CF  | blue | na |
| chrUn | 35388818 | 35389192 | 375 SAT1_CF  | blue | na |
| chrUn | 35389203 | 35389865 | 663 SAT1_CF  | blue | na |
| chrUn | 35389930 | 35390409 | 480 SAT1_CF  | blue | na |
| chrUn | 35390434 | 35390504 | 71 SAT1_CF   | blue | na |
| chrUn | 35390516 | 35391240 | 725 SAT1_CF  | blue | na |
| chrUn | 35391254 | 35391746 | 493 SAT1_CF  | blue | na |
| chrUn | 35391757 | 35392429 | 673 SAT1_CF  | blue | na |
| chrUn | 35392451 | 35393822 | 1372 SAT1_CF | blue | na |
| chrUn | 35393865 | 35394410 | 546 SAT1_CF  | blue | na |
| chrUn | 35394432 | 35395183 | 752 SAT1_CF  | blue | na |
| chrUn | 35395204 | 35395313 | 110 SAT1_CF  | blue | na |
| chrUn | 35395327 | 35395825 | 499 SAT1_CF  | blue | na |
| chrUn | 35395912 | 35396267 | 356 SAT1_CF  | blue | na |
| chrUn | 35396281 | 35396892 | 612 SAT1_CF  | blue | na |
| chrUn | 35396936 | 35397685 | 750 SAT1_CF  | blue | na |
| chrUn | 35397711 | 35398617 | 907 SAT1_CF  | blue | na |
| chrUn | 35398629 | 35399182 | 554 SAT1_CF  | blue | na |
| chrUn | 35399204 | 35399311 | 108 SAT1_CF  | blue | na |
| chrUn | 35399324 | 35399824 | 501 SAT1_CF  | blue | na |
| chrUn | 35399864 | 35400264 | 401 SAT1_CF  | blue | na |
| chrUn | 35400275 | 35401688 | 1414 SAT1_CF | blue | na |
| chrUn | 35401700 | 35402383 | 684 SAT1_CF  | blue | na |
| chrUn | 35402403 | 35403364 | 962 SAT1_CF  | blue | na |
| chrUn | 35403408 | 35404609 | 1202 SAT1_CF | blue | na |
| chrUn | 35404629 | 35405227 | 599 SAT1_CF  | blue | na |
| chrUn | 35405284 | 35405356 | 73 SAT1_CF   | blue | na |
| chrUn | 35405368 | 35405889 | 522 SAT1_CF  | blue | na |
| chrUn | 35405915 | 35406072 | 158 SAT1_CF  | blue | na |

|       |          |          |              |        |    |
|-------|----------|----------|--------------|--------|----|
| chrUn | 35406100 | 35406610 | 511 SAT1_CF  | blue   | na |
| chrUn | 35406690 | 35407254 | 565 SAT1_CF  | blue   | na |
| chrUn | 35407282 | 35409206 | 1925 SAT1_CF | blue   | na |
| chrUn | 35409274 | 35410321 | 1048 SAT1_CF | blue   | na |
| chrUn | 35410339 | 35411265 | 927 SAT1_CF  | blue   | na |
| chrUn | 35411307 | 35411977 | 671 SAT1_CF  | blue   | na |
| chrUn | 35411995 | 35412676 | 682 SAT1_CF  | blue   | na |
| chrUn | 35412689 | 35413580 | 892 SAT1_CF  | blue   | na |
| chrUn | 35413592 | 35414595 | 1004 SAT1_CF | blue   | na |
| chrUn | 35414608 | 35415129 | 522 SAT1_CF  | blue   | na |
| chrUn | 35415150 | 35415552 | 403 SAT1_CF  | blue   | na |
| chrUn | 35415602 | 35416144 | 543 SAT1_CF  | blue   | na |
| chrUn | 35416224 | 35417206 | 983 SAT1_CF  | blue   | na |
| chrUn | 35417249 | 35417795 | 547 SAT1_CF  | blue   | na |
| chrUn | 35417824 | 35417926 | 103 SAT1_CF  | blue   | na |
| chrUn | 35417938 | 35419556 | 1619 SAT1_CF | blue   | na |
| chrUn | 35419598 | 35420451 | 854 SAT1_CF  | blue   | na |
| chrUn | 35420463 | 35421147 | 685 SAT1_CF  | blue   | na |
| chrUn | 35421160 | 35421681 | 522 SAT1_CF  | blue   | na |
| chrUn | 35421710 | 35422382 | 673 SAT1_CF  | blue   | na |
| chrUn | 35422395 | 35423896 | 1502 SAT1_CF | blue   | na |
| chrUn | 35423995 | 35424991 | 997 SAT1_CF  | blue   | na |
| chrUn | 35425034 | 35425709 | 676 SAT1_CF  | blue   | na |
| chrUn | 35425722 | 35426224 | 503 SAT1_CF  | blue   | na |
| chrUn | 35426237 | 35426837 | 601 SAT1_CF  | blue   | na |
| chrUn | 35428253 | 35429577 | 1325 SAT1_CF | blue   | na |
| chrUn | 35429591 | 35430083 | 493 SAT1_CF  | blue   | na |
| chrUn | 35430094 | 35432559 | 2466 SAT1_CF | blue   | na |
| chrUn | 35433899 | 35434321 | 423 CarSat1  | red    | na |
| chrUn | 35434353 | 35435072 | 720 CarSat1  | red    | na |
| chrUn | 35435067 | 35436198 | 1132 SAT1_CF | blue   | na |
| chrUn | 35436211 | 35437181 | 971 SAT1_CF  | blue   | na |
| chrUn | 35437200 | 35439638 | 2439 SAT1_CF | blue   | na |
| chrUn | 35439716 | 35440301 | 586 SAT1_CF  | blue   | na |
| chrUn | 35440381 | 35441422 | 1042 SAT1_CF | blue   | na |
| chrUn | 35441465 | 35441973 | 509 SAT1_CF  | blue   | na |
| chrUn | 35441987 | 35442379 | 393 SAT1_CF  | blue   | na |
| chrUn | 35442384 | 35445098 | 2715 CarSat1 | red    | na |
| chrUn | 35445119 | 35445911 | 793 CarSat1  | red    | na |
| chrUn | 35445929 | 35446704 | 776 CarSat1  | red    | na |
| chrUn | 35446725 | 35447249 | 525 CarSat1  | red    | na |
| chrUn | 35447649 | 35448816 | 1168 Sat2CF  | purple | na |

|       |          |          |      |         |        |    |
|-------|----------|----------|------|---------|--------|----|
| chrUn | 35448708 | 35448885 | 178  | Sat2CF  | purple | na |
| chrUn | 35463785 | 35464568 | 784  | Sat2CF  | purple | na |
| chrUn | 35464273 | 35464618 | 346  | Sat2CF  | purple | na |
| chrUn | 35477946 | 35478825 | 880  | Sat2CF  | purple | na |
| chrUn | 35481844 | 35481978 | 135  | CarSat1 | red    | na |
| chrUn | 35482005 | 35483352 | 1348 | CarSat1 | red    | na |
| chrUn | 35483373 | 35483804 | 432  | CarSat1 | red    | na |
| chrUn | 35494295 | 35494612 | 318  | CarSat1 | red    | na |
| chrUn | 35494811 | 35495695 | 885  | CarSat1 | red    | na |
| chrUn | 35495727 | 35497414 | 1688 | CarSat1 | red    | na |
| chrUn | 35497662 | 35498392 | 731  | CarSat1 | red    | na |
| chrUn | 35498414 | 35499129 | 716  | CarSat1 | red    | na |
| chrUn | 35499151 | 35500839 | 1689 | CarSat1 | red    | na |
| chrUn | 35500879 | 35501573 | 695  | CarSat1 | red    | na |
| chrUn | 35501607 | 35504519 | 2913 | CarSat1 | red    | na |
| chrUn | 35504543 | 35505257 | 715  | CarSat1 | red    | na |
| chrUn | 35505281 | 35509900 | 4620 | CarSat1 | red    | na |
| chrUn | 35509915 | 35510041 | 127  | Carsat2 | orange | na |
| chrUn | 35509930 | 35510643 | 714  | CarSat1 | red    | na |
| chrUn | 35510673 | 35512117 | 1445 | CarSat1 | red    | na |
| chrUn | 35512132 | 35512258 | 127  | Carsat2 | orange | na |
| chrUn | 35512147 | 35512852 | 706  | CarSat1 | red    | na |
| chrUn | 35512867 | 35512994 | 128  | Carsat2 | orange | na |
| chrUn | 35512882 | 35515330 | 2449 | CarSat1 | red    | na |
| chrUn | 35515351 | 35515943 | 593  | CarSat1 | red    | na |
| chrUn | 35629794 | 35630928 | 1135 | Sat2CF  | purple | na |
| chrUn | 35629927 | 35631013 | 1087 | Sat2CF  | purple | na |
| chrUn | 35630889 | 35631038 | 150  | Sat2CF  | purple | na |
| chrUn | 35644751 | 35645630 | 880  | Sat2CF  | purple | na |
| chrUn | 35644903 | 35645715 | 813  | Sat2CF  | purple | na |
| chrUn | 35671309 | 35672430 | 1122 | Sat2CF  | purple | na |
| chrUn | 35687246 | 35688398 | 1153 | Sat2CF  | purple | na |
| chrUn | 35710378 | 35710555 | 178  | Sat2CF  | purple | na |
| chrUn | 35710426 | 35710941 | 516  | Sat2CF  | purple | na |
| chrUn | 35710651 | 35710982 | 332  | Sat2CF  | purple | na |
| chrUn | 35719859 | 35721025 | 1167 | Sat2CF  | purple | na |
| chrUn | 35739073 | 35740231 | 1159 | Sat2CF  | purple | na |
| chrUn | 35782290 | 35782994 | 705  | CarSat1 | red    | na |
| chrUn | 35783024 | 35784606 | 1583 | CarSat1 | red    | na |
| chrUn | 35784627 | 35785477 | 851  | CarSat1 | red    | na |
| chrUn | 35785500 | 35786356 | 857  | CarSat1 | red    | na |
| chrUn | 35786377 | 35787155 | 779  | CarSat1 | red    | na |

|       |          |          |              |      |    |
|-------|----------|----------|--------------|------|----|
| chrUn | 35787169 | 35787612 | 444 CarSat1  | red  | na |
| chrUn | 35787615 | 35788629 | 1015 SAT1_CF | blue | na |
| chrUn | 35788624 | 35789348 | 725 CarSat1  | red  | na |
| chrUn | 35789380 | 35789806 | 427 CarSat1  | red  | na |
| chrUn | 35791246 | 35792027 | 782 SAT1_CF  | blue | na |
| chrUn | 35792107 | 35792631 | 525 SAT1_CF  | blue | na |
| chrUn | 35792646 | 35792782 | 137 SAT1_CF  | blue | na |
| chrUn | 35792829 | 35793349 | 521 SAT1_CF  | blue | na |
| chrUn | 35793361 | 35794035 | 675 SAT1_CF  | blue | na |
| chrUn | 35794078 | 35795224 | 1147 SAT1_CF | blue | na |
| chrUn | 35795294 | 35797855 | 2562 SAT1_CF | blue | na |
| chrUn | 35797875 | 35798358 | 484 SAT1_CF  | blue | na |
| chrUn | 35798370 | 35799055 | 686 SAT1_CF  | blue | na |
| chrUn | 35799073 | 35799743 | 671 SAT1_CF  | blue | na |
| chrUn | 35799786 | 35801408 | 1623 SAT1_CF | blue | na |
| chrUn | 35801419 | 35802981 | 1563 SAT1_CF | blue | na |
| chrUn | 35803016 | 35804614 | 1599 SAT1_CF | blue | na |
| chrUn | 35804633 | 35805504 | 872 SAT1_CF  | blue | na |
| chrUn | 35805517 | 35806119 | 603 SAT1_CF  | blue | na |
| chrUn | 35806131 | 35806805 | 675 SAT1_CF  | blue | na |
| chrUn | 35806848 | 35807812 | 965 SAT1_CF  | blue | na |
| chrUn | 35807856 | 35808921 | 1066 SAT1_CF | blue | na |
| chrUn | 35808984 | 35809466 | 483 SAT1_CF  | blue | na |
| chrUn | 35809478 | 35810162 | 685 SAT1_CF  | blue | na |
| chrUn | 35810205 | 35810801 | 597 SAT1_CF  | blue | na |
| chrUn | 35810829 | 35811575 | 747 SAT1_CF  | blue | na |
| chrUn | 35811654 | 35812613 | 960 SAT1_CF  | blue | na |
| chrUn | 35812653 | 35813155 | 503 SAT1_CF  | blue | na |
| chrUn | 35813182 | 35813849 | 668 SAT1_CF  | blue | na |
| chrUn | 35813867 | 35814456 | 590 SAT1_CF  | blue | na |
| chrUn | 35814468 | 35814551 | 84 SAT1_CF   | blue | na |
| chrUn | 35814564 | 35815511 | 948 SAT1_CF  | blue | na |
| chrUn | 35815564 | 35818109 | 2546 SAT1_CF | blue | na |
| chrUn | 35818122 | 35818804 | 683 SAT1_CF  | blue | na |
| chrUn | 35818819 | 35819492 | 674 SAT1_CF  | blue | na |
| chrUn | 35819535 | 35821190 | 1656 SAT1_CF | blue | na |
| chrUn | 35821201 | 35821520 | 320 SAT1_CF  | blue | na |
| chrUn | 35821573 | 35822073 | 501 SAT1_CF  | blue | na |
| chrUn | 35822085 | 35822744 | 660 SAT1_CF  | blue | na |
| chrUn | 35822798 | 35823947 | 1150 SAT1_CF | blue | na |
| chrUn | 35824026 | 35824574 | 549 SAT1_CF  | blue | na |
| chrUn | 35824690 | 35825230 | 541 SAT1_CF  | blue | na |



|       |          |          |              |      |    |
|-------|----------|----------|--------------|------|----|
| chrUn | 35825318 | 35825819 | 502 SAT1_CF  | blue | na |
| chrUn | 35825831 | 35827106 | 1276 SAT1_CF | blue | na |
| chrUn | 35827134 | 35827697 | 564 SAT1_CF  | blue | na |
| chrUn | 35827740 | 35828262 | 523 SAT1_CF  | blue | na |
| chrUn | 35828277 | 35828413 | 137 SAT1_CF  | blue | na |
| chrUn | 35828479 | 35828977 | 499 SAT1_CF  | blue | na |
| chrUn | 35828999 | 35831171 | 2173 SAT1_CF | blue | na |
| chrUn | 35831192 | 35831798 | 607 SAT1_CF  | blue | na |
| chrUn | 35831812 | 35831987 | 176 SAT1_CF  | blue | na |
| chrUn | 35832016 | 35832537 | 522 SAT1_CF  | blue | na |
| chrUn | 35832550 | 35833155 | 606 SAT1_CF  | blue | na |
| chrUn | 35833173 | 35834077 | 905 SAT1_CF  | blue | na |
| chrUn | 35834105 | 35834650 | 546 SAT1_CF  | blue | na |
| chrUn | 35834729 | 35836293 | 1565 SAT1_CF | blue | na |
| chrUn | 35836307 | 35836988 | 682 SAT1_CF  | blue | na |
| chrUn | 35837000 | 35837683 | 684 SAT1_CF  | blue | na |
| chrUn | 35837694 | 35838186 | 493 SAT1_CF  | blue | na |
| chrUn | 35838200 | 35838907 | 708 SAT1_CF  | blue | na |
| chrUn | 35838950 | 35839828 | 879 SAT1_CF  | blue | na |
| chrUn | 35839842 | 35840404 | 563 SAT1_CF  | blue | na |
| chrUn | 35841817 | 35842390 | 574 SAT1_CF  | blue | na |
| chrUn | 35842430 | 35842922 | 493 SAT1_CF  | blue | na |
| chrUn | 35842939 | 35843621 | 683 SAT1_CF  | blue | na |
| chrUn | 35843632 | 35844236 | 605 SAT1_CF  | blue | na |
| chrUn | 35844279 | 35844779 | 501 SAT1_CF  | blue | na |
| chrUn | 35844792 | 35845595 | 804 SAT1_CF  | blue | na |
| chrUn | 35845618 | 35846163 | 546 SAT1_CF  | blue | na |
| chrUn | 35846243 | 35846605 | 363 SAT1_CF  | blue | na |
| chrUn | 35846654 | 35847153 | 500 SAT1_CF  | blue | na |
| chrUn | 35847165 | 35847848 | 684 SAT1_CF  | blue | na |
| chrUn | 35847900 | 35848440 | 541 SAT1_CF  | blue | na |
| chrUn | 35848511 | 35850338 | 1828 SAT1_CF | blue | na |
| chrUn | 35850378 | 35850879 | 502 SAT1_CF  | blue | na |
| chrUn | 35850892 | 35851650 | 759 SAT1_CF  | blue | na |
| chrUn | 35851663 | 35852338 | 676 SAT1_CF  | blue | na |
| chrUn | 35852381 | 35853311 | 931 SAT1_CF  | blue | na |
| chrUn | 35853427 | 35854340 | 914 SAT1_CF  | blue | na |
| chrUn | 35854427 | 35854928 | 502 SAT1_CF  | blue | na |
| chrUn | 35854952 | 35855622 | 671 SAT1_CF  | blue | na |
| chrUn | 35855640 | 35856301 | 662 SAT1_CF  | blue | na |
| chrUn | 35856313 | 35856466 | 154 SAT1_CF  | blue | na |
| chrUn | 35856508 | 35857020 | 513 SAT1_CF  | blue | na |

|       |          |          |              |      |    |
|-------|----------|----------|--------------|------|----|
| chrUn | 35857032 | 35857706 | 675 SAT1_CF  | blue | na |
| chrUn | 35857749 | 35858291 | 543 SAT1_CF  | blue | na |
| chrUn | 35858341 | 35858661 | 321 SAT1_CF  | blue | na |
| chrUn | 35858726 | 35859282 | 557 SAT1_CF  | blue | na |
| chrUn | 35859295 | 35859997 | 703 SAT1_CF  | blue | na |
| chrUn | 35860009 | 35860678 | 670 SAT1_CF  | blue | na |
| chrUn | 35860733 | 35861235 | 503 SAT1_CF  | blue | na |
| chrUn | 35861247 | 35861356 | 110 SAT1_CF  | blue | na |
| chrUn | 35861377 | 35861913 | 537 SAT1_CF  | blue | na |
| chrUn | 35861951 | 35862264 | 314 SAT1_CF  | blue | na |
| chrUn | 35862305 | 35863985 | 1681 SAT1_CF | blue | na |
| chrUn | 35864000 | 35864703 | 704 SAT1_CF  | blue | na |
| chrUn | 35864716 | 35865399 | 684 SAT1_CF  | blue | na |
| chrUn | 35865411 | 35866087 | 677 SAT1_CF  | blue | na |
| chrUn | 35866184 | 35867392 | 1209 SAT1_CF | blue | na |
| chrUn | 35867420 | 35867555 | 136 SAT1_CF  | blue | na |
| chrUn | 35867638 | 35868121 | 484 SAT1_CF  | blue | na |
| chrUn | 35868134 | 35869087 | 954 SAT1_CF  | blue | na |
| chrUn | 35869109 | 35869617 | 509 SAT1_CF  | blue | na |
| chrUn | 35869660 | 35870386 | 727 SAT1_CF  | blue | na |
| chrUn | 35870429 | 35870946 | 518 SAT1_CF  | blue | na |
| chrUn | 36103357 | 36104082 | 726 SAT1_CF  | blue | na |
| chrUn | 36104125 | 36104635 | 511 SAT1_CF  | blue | na |
| chrUn | 36104664 | 36104821 | 158 SAT1_CF  | blue | na |
| chrUn | 36104866 | 36106071 | 1206 SAT1_CF | blue | na |
| chrUn | 36106083 | 36106755 | 673 SAT1_CF  | blue | na |
| chrUn | 36106798 | 36108793 | 1996 SAT1_CF | blue | na |
| chrUn | 36108879 | 36110696 | 1818 SAT1_CF | blue | na |
| chrUn | 36110721 | 36111779 | 1059 SAT1_CF | blue | na |
| chrUn | 36111791 | 36112109 | 319 SAT1_CF  | blue | na |
| chrUn | 36112157 | 36112663 | 507 SAT1_CF  | blue | na |
| chrUn | 36112676 | 36113443 | 768 SAT1_CF  | blue | na |
| chrUn | 36113456 | 36114784 | 1329 SAT1_CF | blue | na |
| chrUn | 36114830 | 36116241 | 1412 SAT1_CF | blue | na |
| chrUn | 36116281 | 36116783 | 503 SAT1_CF  | blue | na |
| chrUn | 36116796 | 36117480 | 685 SAT1_CF  | blue | na |
| chrUn | 36117492 | 36118174 | 683 SAT1_CF  | blue | na |
| chrUn | 36118186 | 36118860 | 675 SAT1_CF  | blue | na |
| chrUn | 36118905 | 36119535 | 631 SAT1_CF  | blue | na |
| chrUn | 36119563 | 36119934 | 372 SAT1_CF  | blue | na |
| chrUn | 36120115 | 36120298 | 184 SAT1_CF  | blue | na |
| chrUn | 36120328 | 36122599 | 2272 SAT1_CF | blue | na |

|       |          |          |              |      |    |
|-------|----------|----------|--------------|------|----|
| chrUn | 36122610 | 36123010 | 401 SAT1_CF  | blue | na |
| chrUn | 36123050 | 36123551 | 502 SAT1_CF  | blue | na |
| chrUn | 36123562 | 36124168 | 607 SAT1_CF  | blue | na |
| chrUn | 36124179 | 36124799 | 621 SAT1_CF  | blue | na |
| chrUn | 36124823 | 36124959 | 137 SAT1_CF  | blue | na |
| chrUn | 36125043 | 36125525 | 483 SAT1_CF  | blue | na |
| chrUn | 36125538 | 36126297 | 760 SAT1_CF  | blue | na |
| chrUn | 36126310 | 36127151 | 842 SAT1_CF  | blue | na |
| chrUn | 36127193 | 36129086 | 1894 SAT1_CF | blue | na |
| chrUn | 36129126 | 36129628 | 503 SAT1_CF  | blue | na |
| chrUn | 36129641 | 36130316 | 676 SAT1_CF  | blue | na |
| chrUn | 36130359 | 36131731 | 1373 SAT1_CF | blue | na |
| chrUn | 36131774 | 36132336 | 563 SAT1_CF  | blue | na |
| chrUn | 36132348 | 36133029 | 682 SAT1_CF  | blue | na |
| chrUn | 36133041 | 36133150 | 110 SAT1_CF  | blue | na |
| chrUn | 36133171 | 36133639 | 469 SAT1_CF  | blue | na |
| chrUn | 36133653 | 36133762 | 110 SAT1_CF  | blue | na |
| chrUn | 36133783 | 36134328 | 546 SAT1_CF  | blue | na |
| chrUn | 36134371 | 36135175 | 805 SAT1_CF  | blue | na |
| chrUn | 36135262 | 36135746 | 485 SAT1_CF  | blue | na |
| chrUn | 36135762 | 36136906 | 1145 SAT1_CF | blue | na |
| chrUn | 36136919 | 36137593 | 675 SAT1_CF  | blue | na |
| chrUn | 36137636 | 36138266 | 631 SAT1_CF  | blue | na |
| chrUn | 36138294 | 36138858 | 565 SAT1_CF  | blue | na |
| chrUn | 36138871 | 36138994 | 124 SAT1_CF  | blue | na |
| chrUn | 36139005 | 36139408 | 404 SAT1_CF  | blue | na |
| chrUn | 36139446 | 36139948 | 503 SAT1_CF  | blue | na |
| chrUn | 36139974 | 36142121 | 2148 SAT1_CF | blue | na |
| chrUn | 36142163 | 36142341 | 179 SAT1_CF  | blue | na |
| chrUn | 36142401 | 36143361 | 961 SAT1_CF  | blue | na |
| chrUn | 36143382 | 36143901 | 520 SAT1_CF  | blue | na |
| chrUn | 36143928 | 36144673 | 746 SAT1_CF  | blue | na |
| chrUn | 36144685 | 36145544 | 860 SAT1_CF  | blue | na |
| chrUn | 36145585 | 36147029 | 1445 SAT1_CF | blue | na |
| chrUn | 36147057 | 36148090 | 1034 SAT1_CF | blue | na |
| chrUn | 36148102 | 36148211 | 110 SAT1_CF  | blue | na |
| chrUn | 36148232 | 36148862 | 631 SAT1_CF  | blue | na |
| chrUn | 36148874 | 36150069 | 1196 SAT1_CF | blue | na |
| chrUn | 36150116 | 36151076 | 961 SAT1_CF  | blue | na |
| chrUn | 36151143 | 36151664 | 522 SAT1_CF  | blue | na |
| chrUn | 36151677 | 36152079 | 403 SAT1_CF  | blue | na |
| chrUn | 36152119 | 36152620 | 502 SAT1_CF  | blue | na |

|       |          |          |              |      |    |
|-------|----------|----------|--------------|------|----|
| chrUn | 36152633 | 36153316 | 684 SAT1_CF  | blue | na |
| chrUn | 36153328 | 36154004 | 677 SAT1_CF  | blue | na |
| chrUn | 36154047 | 36154678 | 632 SAT1_CF  | blue | na |
| chrUn | 36154706 | 36155935 | 1230 SAT1_CF | blue | na |
| chrUn | 36155963 | 36156099 | 137 SAT1_CF  | blue | na |
| chrUn | 36156146 | 36156667 | 522 SAT1_CF  | blue | na |
| chrUn | 36156680 | 36157364 | 685 SAT1_CF  | blue | na |
| chrUn | 36157376 | 36158059 | 684 SAT1_CF  | blue | na |
| chrUn | 36158071 | 36159842 | 1772 SAT1_CF | blue | na |
| chrUn | 36159867 | 36160828 | 962 SAT1_CF  | blue | na |
| chrUn | 36160868 | 36161443 | 576 SAT1_CF  | blue | na |
| chrUn | 36161456 | 36161563 | 108 SAT1_CF  | blue | na |
| chrUn | 36161584 | 36162123 | 540 SAT1_CF  | blue | na |
| chrUn | 36162136 | 36162896 | 761 SAT1_CF  | blue | na |
| chrUn | 36162908 | 36163570 | 663 SAT1_CF  | blue | na |
| chrUn | 36163627 | 36165842 | 2216 SAT1_CF | blue | na |
| chrUn | 36165855 | 36166849 | 995 SAT1_CF  | blue | na |
| chrUn | 36166861 | 36167471 | 611 SAT1_CF  | blue | na |
| chrUn | 36167490 | 36167655 | 166 SAT1_CF  | blue | na |
| chrUn | 36167668 | 36168517 | 850 SAT1_CF  | blue | na |
| chrUn | 36168594 | 36169608 | 1015 SAT1_CF | blue | na |
| chrUn | 36169630 | 36170295 | 666 SAT1_CF  | blue | na |
| chrUn | 36170338 | 36171411 | 1074 SAT1_CF | blue | na |
| chrUn | 36439828 | 36440032 | 205 SAT1_CF  | blue | na |
| chrUn | 36440077 | 36440576 | 500 SAT1_CF  | blue | na |
| chrUn | 36440589 | 36441189 | 601 SAT1_CF  | blue | na |
| chrUn | 36441201 | 36441876 | 676 SAT1_CF  | blue | na |
| chrUn | 36441919 | 36443439 | 1521 SAT1_CF | blue | na |
| chrUn | 36444823 | 36445572 | 750 SAT1_CF  | blue | na |
| chrUn | 36445584 | 36447389 | 1806 SAT1_CF | blue | na |
| chrUn | 36447407 | 36448329 | 923 SAT1_CF  | blue | na |
| chrUn | 36448362 | 36448883 | 522 SAT1_CF  | blue | na |
| chrUn | 36448895 | 36449580 | 686 SAT1_CF  | blue | na |
| chrUn | 36449623 | 36450220 | 598 SAT1_CF  | blue | na |
| chrUn | 36450248 | 36450793 | 546 SAT1_CF  | blue | na |
| chrUn | 36450835 | 36451013 | 179 SAT1_CF  | blue | na |
| chrUn | 36451073 | 36452574 | 1502 SAT1_CF | blue | na |
| chrUn | 36452587 | 36453875 | 1289 SAT1_CF | blue | na |
| chrUn | 36453887 | 36453970 | 84 SAT1_CF   | blue | na |
| chrUn | 36453983 | 36454526 | 544 SAT1_CF  | blue | na |
| chrUn | 36454611 | 36454929 | 319 SAT1_CF  | blue | na |
| chrUn | 36454982 | 36455473 | 492 SAT1_CF  | blue | na |

|       |          |          |              |      |    |
|-------|----------|----------|--------------|------|----|
| chrUn | 36455499 | 36456102 | 604 SAT1_CF  | blue | na |
| chrUn | 36456114 | 36456784 | 671 SAT1_CF  | blue | na |
| chrUn | 36456832 | 36457789 | 958 SAT1_CF  | blue | na |
| chrUn | 36457844 | 36458430 | 587 SAT1_CF  | blue | na |
| chrUn | 36458533 | 36459114 | 582 SAT1_CF  | blue | na |
| chrUn | 36459126 | 36459802 | 677 SAT1_CF  | blue | na |
| chrUn | 36459845 | 36460466 | 622 SAT1_CF  | blue | na |
| chrUn | 36460502 | 36461066 | 565 SAT1_CF  | blue | na |
| chrUn | 36461145 | 36461668 | 524 SAT1_CF  | blue | na |
| chrUn | 36461683 | 36461841 | 159 SAT1_CF  | blue | na |
| chrUn | 36461885 | 36462385 | 501 SAT1_CF  | blue | na |
| chrUn | 36462407 | 36463081 | 675 SAT1_CF  | blue | na |
| chrUn | 36463093 | 36463735 | 643 SAT1_CF  | blue | na |
| chrUn | 36463760 | 36465509 | 1750 SAT1_CF | blue | na |
| chrUn | 36465521 | 36465839 | 319 SAT1_CF  | blue | na |
| chrUn | 36465892 | 36466394 | 503 SAT1_CF  | blue | na |
| chrUn | 36466420 | 36467209 | 790 SAT1_CF  | blue | na |
| chrUn | 36467231 | 36468252 | 1022 SAT1_CF | blue | na |
| chrUn | 36468351 | 36469174 | 824 SAT1_CF  | blue | na |
| chrUn | 36469217 | 36469581 | 365 SAT1_CF  | blue | na |
| chrUn | 36469606 | 36470126 | 521 SAT1_CF  | blue | na |
| chrUn | 36470139 | 36470814 | 676 SAT1_CF  | blue | na |
| chrUn | 36470857 | 36472527 | 1671 SAT1_CF | blue | na |
| chrUn | 36472539 | 36473438 | 900 SAT1_CF  | blue | na |
| chrUn | 36473481 | 36474023 | 543 SAT1_CF  | blue | na |
| chrUn | 36474035 | 36474144 | 110 SAT1_CF  | blue | na |
| chrUn | 36474164 | 36476490 | 2327 SAT1_CF | blue | na |
| chrUn | 36476502 | 36477865 | 1364 SAT1_CF | blue | na |
| chrUn | 36477878 | 36478457 | 580 SAT1_CF  | blue | na |
| chrUn | 36478520 | 36479074 | 555 SAT1_CF  | blue | na |
| chrUn | 36479086 | 36479760 | 675 SAT1_CF  | blue | na |
| chrUn | 36479803 | 36480876 | 1074 SAT1_CF | blue | na |
| chrUn | 36480908 | 36481598 | 691 SAT1_CF  | blue | na |
| chrUn | 36481645 | 36482158 | 514 SAT1_CF  | blue | na |
| chrUn | 36482180 | 36482861 | 682 SAT1_CF  | blue | na |
| chrUn | 36482873 | 36482981 | 109 SAT1_CF  | blue | na |
| chrUn | 36483002 | 36483541 | 540 SAT1_CF  | blue | na |
| chrUn | 36483569 | 36483803 | 235 SAT1_CF  | blue | na |
| chrUn | 36483815 | 36484492 | 678 SAT1_CF  | blue | na |
| chrUn | 36484535 | 36486191 | 1657 SAT1_CF | blue | na |
| chrUn | 36486202 | 36486521 | 320 SAT1_CF  | blue | na |
| chrUn | 36486595 | 36487074 | 480 SAT1_CF  | blue | na |

|       |          |          |              |      |    |
|-------|----------|----------|--------------|------|----|
| chrUn | 36487086 | 36487769 | 684 SAT1_CF  | blue | na |
| chrUn | 36487781 | 36487851 | 71 SAT1_CF   | blue | na |
| chrUn | 36487876 | 36490168 | 2293 SAT1_CF | blue | na |
| chrUn | 36490180 | 36491962 | 1783 SAT1_CF | blue | na |
| chrUn | 36491974 | 36492080 | 107 SAT1_CF  | blue | na |
| chrUn | 36492104 | 36492732 | 629 SAT1_CF  | blue | na |
| chrUn | 36492756 | 36493203 | 448 SAT1_CF  | blue | na |
| chrUn | 36493220 | 36493375 | 156 SAT1_CF  | blue | na |
| chrUn | 36493405 | 36493930 | 526 SAT1_CF  | blue | na |
| chrUn | 36493945 | 36494081 | 137 SAT1_CF  | blue | na |
| chrUn | 36494177 | 36494696 | 520 SAT1_CF  | blue | na |
| chrUn | 36494753 | 36495298 | 546 SAT1_CF  | blue | na |
| chrUn | 36495340 | 36495884 | 545 SAT1_CF  | blue | na |
| chrUn | 36495926 | 36496946 | 1021 SAT1_CF | blue | na |
| chrUn | 36496998 | 36497155 | 158 SAT1_CF  | blue | na |
| chrUn | 36497202 | 36497700 | 499 SAT1_CF  | blue | na |
| chrUn | 36497717 | 36498396 | 680 SAT1_CF  | blue | na |
| chrUn | 36498409 | 36499021 | 613 SAT1_CF  | blue | na |
| chrUn | 36499033 | 36499892 | 860 SAT1_CF  | blue | na |
| chrUn | 36499969 | 36501677 | 1709 SAT1_CF | blue | na |
| chrUn | 36501691 | 36502201 | 511 SAT1_CF  | blue | na |
| chrUn | 36502214 | 36503861 | 1648 SAT1_CF | blue | na |
| chrUn | 36503889 | 36504046 | 158 SAT1_CF  | blue | na |
| chrUn | 36504091 | 36504592 | 502 SAT1_CF  | blue | na |
| chrUn | 36504605 | 36505288 | 684 SAT1_CF  | blue | na |
| chrUn | 36505300 | 36506930 | 1631 SAT1_CF | blue | na |
| chrUn | 36507005 | 36507248 | 244 SAT1_CF  | blue | na |
| chrUn | 36507266 | 36508194 | 929 SAT1_CF  | blue | na |
| chrUn | 36508232 | 36508736 | 505 SAT1_CF  | blue | na |
| chrUn | 36508754 | 36509438 | 685 SAT1_CF  | blue | na |
| chrUn | 36509450 | 36510885 | 1436 SAT1_CF | blue | na |
| chrUn | 36510897 | 36511859 | 963 SAT1_CF  | blue | na |
| chrUn | 36511906 | 36512447 | 542 SAT1_CF  | blue | na |
| chrUn | 36512492 | 36513455 | 964 SAT1_CF  | blue | na |
| chrUn | 36513535 | 36514444 | 910 SAT1_CF  | blue | na |
| chrUn | 36514497 | 36514997 | 501 SAT1_CF  | blue | na |
| chrUn | 36515015 | 36516625 | 1611 SAT1_CF | blue | na |
| chrUn | 36516695 | 36517241 | 547 SAT1_CF  | blue | na |
| chrUn | 36517289 | 36517875 | 587 SAT1_CF  | blue | na |
| chrUn | 36518877 | 36519121 | 245 SAT1_CF  | blue | na |
| chrUn | 36519133 | 36520500 | 1368 SAT1_CF | blue | na |
| chrUn | 36520543 | 36521537 | 995 SAT1_CF  | blue | na |

|       |          |          |              |      |    |
|-------|----------|----------|--------------|------|----|
| chrUn | 36521550 | 36522070 | 521 SAT1_CF  | blue | na |
| chrUn | 36522101 | 36522295 | 195 SAT1_CF  | blue | na |
| chrUn | 36522323 | 36523050 | 728 SAT1_CF  | blue | na |
| chrUn | 36523089 | 36523633 | 545 SAT1_CF  | blue | na |
| chrUn | 36523646 | 36523946 | 301 SAT1_CF  | blue | na |
| chrUn | 36523958 | 36524071 | 114 SAT1_CF  | blue | na |
| chrUn | 36524088 | 36524720 | 633 SAT1_CF  | blue | na |
| chrUn | 36524733 | 36525407 | 675 SAT1_CF  | blue | na |
| chrUn | 36525450 | 36526923 | 1474 SAT1_CF | blue | na |
| chrUn | 36531035 | 36531266 | 232 SAT1_CF  | blue | na |
| chrUn | 36531308 | 36532504 | 1197 SAT1_CF | blue | na |
| chrUn | 36532532 | 36532690 | 159 SAT1_CF  | blue | na |
| chrUn | 36532734 | 36533236 | 503 SAT1_CF  | blue | na |
| chrUn | 36533248 | 36533930 | 683 SAT1_CF  | blue | na |
| chrUn | 36533942 | 36534619 | 678 SAT1_CF  | blue | na |
| chrUn | 36534716 | 36535257 | 542 SAT1_CF  | blue | na |
| chrUn | 36535282 | 36536159 | 878 SAT1_CF  | blue | na |
| chrUn | 36536207 | 36537176 | 970 SAT1_CF  | blue | na |
| chrUn | 36537255 | 36537888 | 634 SAT1_CF  | blue | na |
| chrUn | 36537941 | 36538319 | 379 SAT1_CF  | blue | na |
| chrUn | 36538406 | 36538908 | 503 SAT1_CF  | blue | na |
| chrUn | 36538933 | 36539602 | 670 SAT1_CF  | blue | na |
| chrUn | 36539614 | 36540290 | 677 SAT1_CF  | blue | na |
| chrUn | 36540334 | 36540673 | 340 SAT1_CF  | blue | na |
| chrUn | 36540697 | 36541196 | 500 SAT1_CF  | blue | na |
| chrUn | 36541216 | 36541898 | 683 SAT1_CF  | blue | na |
| chrUn | 36541921 | 36542585 | 665 SAT1_CF  | blue | na |
| chrUn | 36542628 | 36543259 | 632 SAT1_CF  | blue | na |
| chrUn | 36543287 | 36544480 | 1194 SAT1_CF | blue | na |
| chrUn | 36544508 | 36544644 | 137 SAT1_CF  | blue | na |
| chrUn | 36544691 | 36545212 | 522 SAT1_CF  | blue | na |
| chrUn | 36545234 | 36546176 | 943 SAT1_CF  | blue | na |
| chrUn | 36546206 | 36546747 | 542 SAT1_CF  | blue | na |
| chrUn | 36546758 | 36547614 | 857 SAT1_CF  | blue | na |
| chrUn | 36547625 | 36548117 | 493 SAT1_CF  | blue | na |
| chrUn | 36548140 | 36549496 | 1357 SAT1_CF | blue | na |
| chrUn | 36549560 | 36550123 | 564 SAT1_CF  | blue | na |
| chrUn | 36550166 | 36550719 | 554 SAT1_CF  | blue | na |
| chrUn | 36550730 | 36551341 | 612 SAT1_CF  | blue | na |
| chrUn | 36551364 | 36552030 | 667 SAT1_CF  | blue | na |
| chrUn | 36552073 | 36553809 | 1737 SAT1_CF | blue | na |
| chrUn | 36554116 | 36555075 | 960 SAT1_CF  | blue | na |

|       |          |          |              |      |    |
|-------|----------|----------|--------------|------|----|
| chrUn | 36555115 | 36555617 | 503 SAT1_CF  | blue | na |
| chrUn | 36555629 | 36556312 | 684 SAT1_CF  | blue | na |
| chrUn | 36556324 | 36557297 | 974 SAT1_CF  | blue | na |
| chrUn | 36557320 | 36557392 | 73 SAT1_CF   | blue | na |
| chrUn | 36557448 | 36559168 | 1721 SAT1_CF | blue | na |
| chrUn | 36559231 | 36559609 | 379 SAT1_CF  | blue | na |
| chrUn | 36559696 | 36560198 | 503 SAT1_CF  | blue | na |
| chrUn | 36560223 | 36560892 | 670 SAT1_CF  | blue | na |
| chrUn | 36560904 | 36562381 | 1478 SAT1_CF | blue | na |
| chrUn | 36562423 | 36562927 | 505 SAT1_CF  | blue | na |
| chrUn | 36562955 | 36563480 | 526 SAT1_CF  | blue | na |
| chrUn | 36563495 | 36563729 | 235 SAT1_CF  | blue | na |
| chrUn | 36563753 | 36564245 | 493 SAT1_CF  | blue | na |
| chrUn | 36564302 | 36564849 | 548 SAT1_CF  | blue | na |
| chrUn | 36564891 | 36565617 | 727 SAT1_CF  | blue | na |
| chrUn | 36565662 | 36566197 | 536 SAT1_CF  | blue | na |
| chrUn | 36566219 | 36566825 | 607 SAT1_CF  | blue | na |
| chrUn | 36567344 | 36567510 | 167 SAT1_CF  | blue | na |
| chrUn | 36567582 | 36568089 | 508 SAT1_CF  | blue | na |
| chrUn | 36568102 | 36568290 | 189 SAT1_CF  | blue | na |
| chrUn | 36568392 | 36568936 | 545 SAT1_CF  | blue | na |
| chrUn | 36568949 | 36569652 | 704 SAT1_CF  | blue | na |
| chrUn | 36569664 | 36570885 | 1222 SAT1_CF | blue | na |
| chrUn | 36570953 | 36571472 | 520 SAT1_CF  | blue | na |
| chrUn | 36571485 | 36572245 | 761 SAT1_CF  | blue | na |
| chrUn | 36572258 | 36573588 | 1331 SAT1_CF | blue | na |
| chrUn | 36573631 | 36575477 | 1847 SAT1_CF | blue | na |
| chrUn | 36575510 | 36575666 | 157 SAT1_CF  | blue | na |
| chrUn | 36575711 | 36576212 | 502 SAT1_CF  | blue | na |
| chrUn | 36576225 | 36577669 | 1445 SAT1_CF | blue | na |
| chrUn | 36577695 | 36578322 | 628 SAT1_CF  | blue | na |
| chrUn | 36578366 | 36579297 | 932 SAT1_CF  | blue | na |
| chrUn | 36579310 | 36579970 | 661 SAT1_CF  | blue | na |
| chrUn | 36580013 | 36580549 | 537 SAT1_CF  | blue | na |
| chrUn | 36580562 | 36582002 | 1441 SAT1_CF | blue | na |
| chrUn | 36582109 | 36582589 | 481 SAT1_CF  | blue | na |
| chrUn | 36582602 | 36583284 | 683 SAT1_CF  | blue | na |
| chrUn | 36583296 | 36583973 | 678 SAT1_CF  | blue | na |
| chrUn | 36584019 | 36584979 | 961 SAT1_CF  | blue | na |
| chrUn | 36585045 | 36585566 | 522 SAT1_CF  | blue | na |
| chrUn | 36585579 | 36585934 | 356 SAT1_CF  | blue | na |
| chrUn | 36586021 | 36586527 | 507 SAT1_CF  | blue | na |



|       |          |          |              |        |    |
|-------|----------|----------|--------------|--------|----|
| chrUn | 36586545 | 36586936 | 392 SAT1_CF  | blue   | na |
| chrUn | 36586976 | 36587478 | 503 SAT1_CF  | blue   | na |
| chrUn | 36587519 | 36588371 | 853 SAT1_CF  | blue   | na |
| chrUn | 36588441 | 36590114 | 1674 SAT1_CF | blue   | na |
| chrUn | 36590132 | 36590656 | 525 SAT1_CF  | blue   | na |
| chrUn | 36590669 | 36591019 | 351 SAT1_CF  | blue   | na |
| chrUn | 36591276 | 36591634 | 359 SAT1_CF  | blue   | na |
| chrUn | 36591646 | 36592946 | 1301 SAT1_CF | blue   | na |
| chrUn | 36593032 | 36593551 | 520 SAT1_CF  | blue   | na |
| chrUn | 36593644 | 36594101 | 458 SAT1_CF  | blue   | na |
| chrUn | 36594188 | 36594689 | 502 SAT1_CF  | blue   | na |
| chrUn | 36594716 | 36595057 | 342 SAT1_CF  | blue   | na |
| chrUn | 36595080 | 36595597 | 518 SAT1_CF  | blue   | na |
| chrUn | 36595609 | 36596465 | 857 SAT1_CF  | blue   | na |
| chrUn | 36596508 | 36597298 | 791 SAT1_CF  | blue   | na |
| chrUn | 36597342 | 36598700 | 1359 SAT1_CF | blue   | na |
| chrUn | 36598780 | 36599304 | 525 SAT1_CF  | blue   | na |
| chrUn | 36599319 | 36599476 | 158 SAT1_CF  | blue   | na |
| chrUn | 36599520 | 36600022 | 503 SAT1_CF  | blue   | na |
| chrUn | 36600044 | 36600794 | 751 SAT1_CF  | blue   | na |
| chrUn | 36605210 | 36605541 | 332 Sat2CF   | purple | na |
| chrUn | 36605251 | 36605766 | 516 Sat2CF   | purple | na |
| chrUn | 36605637 | 36605814 | 178 Sat2CF   | purple | na |
| chrUn | 36620694 | 36621534 | 841 Sat2CF   | purple | na |
| chrUn | 36620759 | 36621484 | 726 Sat2CF   | purple | na |
| chrUn | 36634103 | 36635355 | 1253 Sat2CF  | purple | na |
| chrUn | 36638031 | 36639571 | 1541 CarSat1 | red    | na |
| chrUn | 36639598 | 36641082 | 1485 CarSat1 | red    | na |
| chrUn | 36649773 | 36650489 | 717 CarSat1  | red    | na |
| chrUn | 36650687 | 36651779 | 1093 CarSat1 | red    | na |
| chrUn | 36651809 | 36657437 | 5629 CarSat1 | red    | na |
| chrUn | 36657453 | 36658383 | 931 CarSat1  | red    | na |
| chrUn | 36658413 | 36659393 | 981 CarSat1  | red    | na |
| chrUn | 36659414 | 36661850 | 2437 CarSat1 | red    | na |
| chrUn | 36661866 | 36663055 | 1190 CarSat1 | red    | na |
| chrUn | 36663604 | 36665348 | 1745 CarSat1 | red    | na |
| chrUn | 36665381 | 36666077 | 697 CarSat1  | red    | na |
| chrUn | 36666093 | 36667543 | 1451 CarSat1 | red    | na |
| chrUn | 36667559 | 36668273 | 715 CarSat1  | red    | na |
| chrUn | 36668297 | 36669502 | 1206 CarSat1 | red    | na |
| chrUn | 36669529 | 36671438 | 1910 CarSat1 | red    | na |
| chrUn | 36671468 | 36673906 | 2439 CarSat1 | red    | na |

|       |          |          |      |         |        |    |
|-------|----------|----------|------|---------|--------|----|
| chrUn | 36674087 | 36674610 | 524  | CarSat1 | red    | na |
| chrUn | 36674874 | 36675502 | 629  | CarSat1 | red    | na |
| chrUn | 36675518 | 36676239 | 722  | CarSat1 | red    | na |
| chrUn | 36676268 | 36678359 | 2092 | CarSat1 | red    | na |
| chrUn | 36679898 | 36680148 | 251  | CarSat1 | red    | na |
| chrUn | 36680180 | 36680897 | 718  | CarSat1 | red    | na |
| chrUn | 36680892 | 36682044 | 1153 | SAT1_CF | blue   | na |
| chrUn | 36682064 | 36684136 | 2073 | SAT1_CF | blue   | na |
| chrUn | 36684217 | 36685996 | 1780 | SAT1_CF | blue   | na |
| chrUn | 36685999 | 36686928 | 930  | CarSat1 | red    | na |
| chrUn | 36686941 | 36687977 | 1037 | CarSat1 | red    | na |
| chrUn | 36687995 | 36688723 | 729  | CarSat1 | red    | na |
| chrUn | 36688716 | 36691994 | 3279 | SAT1_CF | blue   | na |
| chrUn | 36692006 | 36695544 | 3539 | SAT1_CF | blue   | na |
| chrUn | 36695549 | 36695760 | 212  | CarSat1 | red    | na |
| chrUn | 36695951 | 36696944 | 994  | CarSat1 | red    | na |
| chrUn | 36696976 | 36698473 | 1498 | CarSat1 | red    | na |
| chrUn | 36698494 | 36699018 | 525  | CarSat1 | red    | na |
| chrUn | 36699418 | 36700587 | 1170 | Sat2CF  | purple | na |
| chrUn | 36700479 | 36700656 | 178  | Sat2CF  | purple | na |
| chrUn | 36715575 | 36716435 | 861  | Sat2CF  | purple | na |
| chrUn | 36728721 | 36729972 | 1252 | Sat2CF  | purple | na |
| chrUn | 36732648 | 36734085 | 1438 | CarSat1 | red    | na |
| chrUn | 36751051 | 36751365 | 315  | SAT1_CF | blue   | na |
| chrUn | 36756028 | 36756721 | 694  | Sat2CF  | purple | na |
| chrUn | 36756405 | 36756807 | 403  | Sat2CF  | purple | na |
| chrUn | 36774401 | 36775486 | 1086 | Sat2CF  | purple | na |
| chrUn | 36775357 | 36775558 | 202  | Sat2CF  | purple | na |
| chrUn | 36777230 | 36777604 | 375  | CarSat1 | red    | na |
| chrUn | 36778572 | 36779428 | 857  | CarSat1 | red    | na |
| chrUn | 36779449 | 36780350 | 902  | CarSat1 | red    | na |
| chrUn | 36805987 | 36806710 | 724  | SAT1_CF | blue   | na |
| chrUn | 36806753 | 36808270 | 1518 | SAT1_CF | blue   | na |
| chrUn | 36808313 | 36810423 | 2111 | SAT1_CF | blue   | na |
| chrUn | 36810467 | 36811264 | 798  | SAT1_CF | blue   | na |
| chrUn | 36937289 | 36938212 | 924  | Sat2CF  | purple | na |
| chrUn | 36937340 | 36938149 | 810  | Sat2CF  | purple | na |
| chrUn | 36964968 | 36966220 | 1253 | Sat2CF  | purple | na |
| chrUn | 36965004 | 36966090 | 1087 | Sat2CF  | purple | na |
| chrUn | 37007278 | 37008016 | 739  | Sat2CF  | purple | na |
| chrUn | 37007280 | 37007942 | 663  | Sat2CF  | purple | na |
| chrUn | 37091387 | 37092152 | 766  | CarSat1 | red    | na |

|       |          |          |              |      |    |
|-------|----------|----------|--------------|------|----|
| chrUn | 37210519 | 37211157 | 639 Sat49CF  | na   | na |
| chrUn | 37264333 | 37264696 | 364 Sat28CF  | na   | na |
| chrUn | 37282857 | 37288508 | 5652 CarSat1 | red  | na |
| chrUn | 37288538 | 37289944 | 1407 CarSat1 | red  | na |
| chrUn | 37293643 | 37294403 | 761 CarSat1  | red  | na |
| chrUn | 37294433 | 37295433 | 1001 CarSat1 | red  | na |
| chrUn | 37295992 | 37296354 | 363 CarSat1  | red  | na |
| chrUn | 37296381 | 37298827 | 2447 CarSat1 | red  | na |
| chrUn | 37300219 | 37302728 | 2510 CarSat1 | red  | na |
| chrUn | 37302761 | 37303734 | 974 CarSat1  | red  | na |
| chrUn | 37304094 | 37304719 | 626 CarSat1  | red  | na |
| chrUn | 37304749 | 37306206 | 1458 CarSat1 | red  | na |
| chrUn | 37306221 | 37306943 | 723 CarSat1  | red  | na |
| chrUn | 37306958 | 37309266 | 2309 CarSat1 | red  | na |
| chrUn | 37309464 | 37313424 | 3961 CarSat1 | red  | na |
| chrUn | 37313488 | 37314013 | 526 SAT1_CF  | blue | na |
| chrUn | 37314066 | 37314560 | 495 SAT1_CF  | blue | na |
| chrUn | 37314580 | 37315261 | 682 SAT1_CF  | blue | na |
| chrUn | 37315274 | 37315951 | 678 SAT1_CF  | blue | na |
| chrUn | 37315993 | 37317486 | 1494 SAT1_CF | blue | na |
| chrUn | 37317532 | 37318074 | 543 SAT1_CF  | blue | na |
| chrUn | 37318087 | 37318586 | 500 SAT1_CF  | blue | na |
| chrUn | 37318599 | 37320565 | 1967 SAT1_CF | blue | na |
| chrUn | 37320607 | 37322529 | 1923 SAT1_CF | blue | na |
| chrUn | 37322572 | 37323389 | 818 SAT1_CF  | blue | na |
| chrUn | 37323565 | 37323738 | 174 SAT1_CF  | blue | na |
| chrUn | 37323817 | 37324779 | 963 SAT1_CF  | blue | na |
| chrUn | 37324837 | 37325319 | 483 SAT1_CF  | blue | na |
| chrUn | 37325337 | 37325503 | 167 SAT1_CF  | blue | na |
| chrUn | 37325515 | 37325624 | 110 SAT1_CF  | blue | na |
| chrUn | 37325645 | 37326188 | 544 SAT1_CF  | blue | na |
| chrUn | 37326231 | 37327858 | 1628 SAT1_CF | blue | na |
| chrUn | 37327902 | 37330380 | 2479 SAT1_CF | blue | na |
| chrUn | 37330437 | 37330918 | 482 SAT1_CF  | blue | na |
| chrUn | 37330936 | 37332005 | 1070 SAT1_CF | blue | na |
| chrUn | 37332028 | 37332508 | 481 SAT1_CF  | blue | na |
| chrUn | 37332543 | 37333381 | 839 SAT1_CF  | blue | na |
| chrUn | 37333398 | 37334092 | 695 SAT1_CF  | blue | na |
| chrUn | 37334116 | 37334688 | 573 SAT1_CF  | blue | na |
| chrUn | 37334709 | 37335221 | 513 SAT1_CF  | blue | na |
| chrUn | 37335232 | 37335942 | 711 SAT1_CF  | blue | na |
| chrUn | 37335955 | 37337040 | 1086 SAT1_CF | blue | na |

|       |          |          |              |        |    |
|-------|----------|----------|--------------|--------|----|
| chrUn | 37337060 | 37338079 | 1020 SAT1_CF | blue   | na |
| chrUn | 37338119 | 37339394 | 1276 SAT1_CF | blue   | na |
| chrUn | 37339406 | 37340079 | 674 SAT1_CF  | blue   | na |
| chrUn | 37340122 | 37341087 | 966 SAT1_CF  | blue   | na |
| chrUn | 37341131 | 37342167 | 1037 SAT1_CF | blue   | na |
| chrUn | 37342203 | 37342698 | 496 SAT1_CF  | blue   | na |
| chrUn | 37342718 | 37343927 | 1210 SAT1_CF | blue   | na |
| chrUn | 37343950 | 37344076 | 127 SAT1_CF  | blue   | na |
| chrUn | 37344089 | 37344693 | 605 SAT1_CF  | blue   | na |
| chrUn | 37344705 | 37345745 | 1041 SAT1_CF | blue   | na |
| chrUn | 37345758 | 37346441 | 684 SAT1_CF  | blue   | na |
| chrUn | 37346453 | 37347360 | 908 SAT1_CF  | blue   | na |
| chrUn | 37347383 | 37348132 | 750 SAT1_CF  | blue   | na |
| chrUn | 37348211 | 37349172 | 962 SAT1_CF  | blue   | na |
| chrUn | 37349229 | 37349712 | 484 SAT1_CF  | blue   | na |
| chrUn | 37349725 | 37350483 | 759 SAT1_CF  | blue   | na |
| chrUn | 37350495 | 37351587 | 1093 SAT1_CF | blue   | na |
| chrUn | 37351615 | 37352138 | 524 SAT1_CF  | blue   | na |
| chrUn | 37352153 | 37352856 | 704 SAT1_CF  | blue   | na |
| chrUn | 37352882 | 37353553 | 672 SAT1_CF  | blue   | na |
| chrUn | 37353565 | 37354240 | 676 SAT1_CF  | blue   | na |
| chrUn | 37354301 | 37355165 | 865 SAT1_CF  | blue   | na |
| chrUn | 37355185 | 37355289 | 105 SAT1_CF  | blue   | na |
| chrUn | 37355314 | 37357066 | 1753 SAT1_CF | blue   | na |
| chrUn | 37357093 | 37357781 | 689 SAT1_CF  | blue   | na |
| chrUn | 37357795 | 37358782 | 988 SAT1_CF  | blue   | na |
| chrUn | 37358810 | 37358967 | 158 SAT1_CF  | blue   | na |
| chrUn | 37359012 | 37359513 | 502 SAT1_CF  | blue   | na |
| chrUn | 37359525 | 37359634 | 110 SAT1_CF  | blue   | na |
| chrUn | 37359655 | 37360286 | 632 SAT1_CF  | blue   | na |
| chrUn | 37360298 | 37360962 | 665 SAT1_CF  | blue   | na |
| chrUn | 37361019 | 37361730 | 712 SAT1_CF  | blue   | na |
| chrUn | 37361772 | 37362424 | 653 SAT1_CF  | blue   | na |
| chrUn | 37373545 | 37374099 | 555 Sat2CF   | purple | na |
| chrUn | 37382958 | 37383691 | 734 Sat2CF   | purple | na |
| chrUn | 37383033 | 37384161 | 1129 Sat2CF  | purple | na |
| chrUn | 37402509 | 37403738 | 1230 Sat2CF  | purple | na |
| chrUn | 37416535 | 37417302 | 768 Sat2CF   | purple | na |
| chrUn | 37416550 | 37417237 | 688 Sat2CF   | purple | na |
| chrUn | 37431497 | 37432201 | 705 CarSat1  | red    | na |
| chrUn | 37432228 | 37433801 | 1574 CarSat1 | red    | na |
| chrUn | 37433822 | 37434676 | 855 CarSat1  | red    | na |

|       |          |          |      |         |        |    |
|-------|----------|----------|------|---------|--------|----|
| chrUn | 37434698 | 37435554 | 857  | CarSat1 | red    | na |
| chrUn | 37435713 | 37436353 | 641  | CarSat1 | red    | na |
| chrUn | 37436371 | 37436810 | 440  | CarSat1 | red    | na |
| chrUn | 37436813 | 37437151 | 339  | SAT1_CF | blue   | na |
| chrUn | 37447361 | 37448126 | 766  | Sat2CF  | purple | na |
| chrUn | 37472217 | 37473373 | 1157 | Sat2CF  | purple | na |
| chrUn | 37473399 | 37474293 | 895  | Sat2CF  | purple | na |
| chrUn | 37505059 | 37506276 | 1218 | Sat2CF  | purple | na |
| chrUn | 37536987 | 37537366 | 380  | Sat2CF  | purple | na |
| chrUn | 37537049 | 37537763 | 715  | Sat2CF  | purple | na |
| chrUn | 37542341 | 37542770 | 430  | SAT1_CF | blue   | na |
| chrUn | 37559805 | 37561286 | 1482 | CarSat1 | red    | na |
| chrUn | 37561314 | 37562164 | 851  | CarSat1 | red    | na |
| chrUn | 37562185 | 37562419 | 235  | CarSat1 | red    | na |
| chrUn | 37562472 | 37563769 | 1298 | CarSat1 | red    | na |
| chrUn | 37566453 | 37567703 | 1251 | Sat2CF  | purple | na |
| chrUn | 37580032 | 37580828 | 797  | Sat2CF  | purple | na |
| chrUn | 37595738 | 37595915 | 178  | Sat2CF  | purple | na |
| chrUn | 37595786 | 37596906 | 1121 | Sat2CF  | purple | na |
| chrUn | 37597305 | 37597829 | 525  | CarSat1 | red    | na |
| chrUn | 37597850 | 37599627 | 1778 | CarSat1 | red    | na |
| chrUn | 37599640 | 37600373 | 734  | CarSat1 | red    | na |
| chrUn | 37600559 | 37600770 | 212  | CarSat1 | red    | na |
| chrUn | 37600775 | 37604084 | 3310 | SAT1_CF | blue   | na |
| chrUn | 37604105 | 37605940 | 1836 | SAT1_CF | blue   | na |
| chrUn | 37605986 | 37607265 | 1280 | SAT1_CF | blue   | na |
| chrUn | 37607286 | 37608432 | 1147 | SAT1_CF | blue   | na |
| chrUn | 37608432 | 37609146 | 715  | CarSat1 | red    | na |
| chrUn | 37609165 | 37609603 | 439  | CarSat1 | red    | na |
| chrUn | 37614711 | 37615137 | 427  | CarSat1 | red    | na |
| chrUn | 37615245 | 37615893 | 649  | CarSat1 | red    | na |
| chrUn | 37615888 | 37616901 | 1014 | SAT1_CF | blue   | na |
| chrUn | 37616904 | 37617343 | 440  | CarSat1 | red    | na |
| chrUn | 37617361 | 37618138 | 778  | CarSat1 | red    | na |
| chrUn | 37618159 | 37619017 | 859  | CarSat1 | red    | na |
| chrUn | 37619039 | 37619892 | 854  | CarSat1 | red    | na |
| chrUn | 37619913 | 37621493 | 1581 | CarSat1 | red    | na |
| chrUn | 37621523 | 37622227 | 705  | CarSat1 | red    | na |
| chrUn | 37643176 | 37643946 | 771  | Sat2CF  | purple | na |
| chrUn | 37679347 | 37679435 | 89   | Sat2CF  | purple | na |
| chrUn | 37688340 | 37688894 | 555  | Sat2CF  | purple | na |
| chrUn | 37691259 | 37693441 | 2183 | CarSat1 | red    | na |

|       |          |          |      |         |        |    |
|-------|----------|----------|------|---------|--------|----|
| chrUn | 37693456 | 37693581 | 126  | Carsat2 | orange | na |
| chrUn | 37693471 | 37695426 | 1956 | CarSat1 | red    | na |
| chrUn | 37695460 | 37696163 | 704  | CarSat1 | red    | na |
| chrUn | 37696187 | 37697291 | 1105 | CarSat1 | red    | na |
| chrUn | 37697476 | 37698078 | 603  | CarSat1 | red    | na |
| chrUn | 37698108 | 37698345 | 238  | CarSat1 | red    | na |
| chrUn | 37698528 | 37702660 | 4133 | CarSat1 | red    | na |
| chrUn | 37703419 | 37704917 | 1499 | CarSat1 | red    | na |
| chrUn | 37704947 | 37706383 | 1437 | CarSat1 | red    | na |
| chrUn | 37706413 | 37708658 | 2246 | CarSat1 | red    | na |
| chrUn | 37708839 | 37709296 | 458  | CarSat1 | red    | na |
| chrUn | 37709377 | 37711673 | 2297 | CarSat1 | red    | na |
| chrUn | 37711714 | 37712446 | 733  | CarSat1 | red    | na |
| chrUn | 37712730 | 37713363 | 634  | CarSat1 | red    | na |
| chrUn | 37713396 | 37714091 | 696  | CarSat1 | red    | na |
| chrUn | 37714116 | 37715033 | 918  | CarSat1 | red    | na |
| chrUn | 37715071 | 37715818 | 748  | CarSat1 | red    | na |
| chrUn | 37796756 | 37797146 | 391  | SAT1_CF | blue   | na |
| chrUn | 37797216 | 37798422 | 1207 | SAT1_CF | blue   | na |
| chrUn | 37798465 | 37798770 | 306  | SAT1_CF | blue   | na |
| chrUn | 37798907 | 37799448 | 542  | SAT1_CF | blue   | na |
| chrUn | 37799463 | 37799962 | 500  | SAT1_CF | blue   | na |
| chrUn | 37799975 | 37800639 | 665  | SAT1_CF | blue   | na |
| chrUn | 37800672 | 37801683 | 1012 | SAT1_CF | blue   | na |
| chrUn | 37801718 | 37802787 | 1070 | SAT1_CF | blue   | na |
| chrUn | 37802808 | 37803937 | 1130 | SAT1_CF | blue   | na |
| chrUn | 37804024 | 37804652 | 629  | SAT1_CF | blue   | na |
| chrUn | 37804679 | 37804937 | 259  | SAT1_CF | blue   | na |
| chrUn | 37804971 | 37805534 | 564  | SAT1_CF | blue   | na |
| chrUn | 37805577 | 37806101 | 525  | SAT1_CF | blue   | na |
| chrUn | 37806116 | 37806252 | 137  | SAT1_CF | blue   | na |
| chrUn | 37806299 | 37807258 | 960  | SAT1_CF | blue   | na |
| chrUn | 37807276 | 37807953 | 678  | SAT1_CF | blue   | na |
| chrUn | 37807972 | 37808074 | 103  | SAT1_CF | blue   | na |
| chrUn | 37808095 | 37808648 | 554  | SAT1_CF | blue   | na |
| chrUn | 37808660 | 37809519 | 860  | SAT1_CF | blue   | na |
| chrUn | 37809561 | 37811007 | 1447 | SAT1_CF | blue   | na |
| chrUn | 37811050 | 37811853 | 804  | SAT1_CF | blue   | na |
| chrUn | 37811867 | 37812584 | 718  | SAT1_CF | blue   | na |
| chrUn | 37812597 | 37813217 | 621  | SAT1_CF | blue   | na |
| chrUn | 37813288 | 37815287 | 2000 | SAT1_CF | blue   | na |
| chrUn | 37815329 | 37816219 | 891  | SAT1_CF | blue   | na |

|       |          |          |              |      |    |
|-------|----------|----------|--------------|------|----|
| chrUn | 37816263 | 37816522 | 260 SAT1_CF  | blue | na |
| chrUn | 37816560 | 37817062 | 503 SAT1_CF  | blue | na |
| chrUn | 37817073 | 37818832 | 1760 SAT1_CF | blue | na |
| chrUn | 37818844 | 37819243 | 400 SAT1_CF  | blue | na |
| chrUn | 37819303 | 37821206 | 1904 SAT1_CF | blue | na |
| chrUn | 37821250 | 37821848 | 599 SAT1_CF  | blue | na |
| chrUn | 37821874 | 37822925 | 1052 SAT1_CF | blue | na |
| chrUn | 37822965 | 37825623 | 2659 SAT1_CF | blue | na |
| chrUn | 37825637 | 37826156 | 520 SAT1_CF  | blue | na |
| chrUn | 37826223 | 37826359 | 137 SAT1_CF  | blue | na |
| chrUn | 37826425 | 37827620 | 1196 SAT1_CF | blue | na |
| chrUn | 37827632 | 37827705 | 74 SAT1_CF   | blue | na |
| chrUn | 37827762 | 37828230 | 469 SAT1_CF  | blue | na |
| chrUn | 37828244 | 37828918 | 675 SAT1_CF  | blue | na |
| chrUn | 37828961 | 37829767 | 807 SAT1_CF  | blue | na |
| chrUn | 37829854 | 37830338 | 485 SAT1_CF  | blue | na |
| chrUn | 37830381 | 37831003 | 623 SAT1_CF  | blue | na |
| chrUn | 37831029 | 37831512 | 484 SAT1_CF  | blue | na |
| chrUn | 37831525 | 37832200 | 676 SAT1_CF  | blue | na |
| chrUn | 37832243 | 37834263 | 2021 SAT1_CF | blue | na |
| chrUn | 37834318 | 37834820 | 503 SAT1_CF  | blue | na |
| chrUn | 37834833 | 37835689 | 857 SAT1_CF  | blue | na |
| chrUn | 37835702 | 37836902 | 1201 SAT1_CF | blue | na |
| chrUn | 37836967 | 37837124 | 158 SAT1_CF  | blue | na |
| chrUn | 37837169 | 37837670 | 502 SAT1_CF  | blue | na |
| chrUn | 37837683 | 37837789 | 107 SAT1_CF  | blue | na |
| chrUn | 37837812 | 37838404 | 593 SAT1_CF  | blue | na |
| chrUn | 37839752 | 37839948 | 197 SAT1_CF  | blue | na |
| chrUn | 37839967 | 37840694 | 728 SAT1_CF  | blue | na |
| chrUn | 37840736 | 37842576 | 1841 SAT1_CF | blue | na |
| chrUn | 37842631 | 37843130 | 500 SAT1_CF  | blue | na |
| chrUn | 37843143 | 37844645 | 1503 SAT1_CF | blue | na |
| chrUn | 37844665 | 37844801 | 137 SAT1_CF  | blue | na |
| chrUn | 37844897 | 37845441 | 545 SAT1_CF  | blue | na |
| chrUn | 37845453 | 37845525 | 73 SAT1_CF   | blue | na |
| chrUn | 37845583 | 37846214 | 632 SAT1_CF  | blue | na |
| chrUn | 37846236 | 37848979 | 2744 SAT1_CF | blue | na |
| chrUn | 37849022 | 37849524 | 503 SAT1_CF  | blue | na |
| chrUn | 37849537 | 37851678 | 2142 SAT1_CF | blue | na |
| chrUn | 37851692 | 37852213 | 522 SAT1_CF  | blue | na |
| chrUn | 37852279 | 37852415 | 137 SAT1_CF  | blue | na |
| chrUn | 37852481 | 37853670 | 1190 SAT1_CF | blue | na |

|       |          |          |              |      |    |
|-------|----------|----------|--------------|------|----|
| chrUn | 37853717 | 37854439 | 723 SAT1_CF  | blue | na |
| chrUn | 37854864 | 37855912 | 1049 SAT1_CF | blue | na |
| chrUn | 37855924 | 37856607 | 684 SAT1_CF  | blue | na |
| chrUn | 37856619 | 37856728 | 110 SAT1_CF  | blue | na |
| chrUn | 37856749 | 37857217 | 469 SAT1_CF  | blue | na |
| chrUn | 37857231 | 37858746 | 1516 SAT1_CF | blue | na |
| chrUn | 37858840 | 37859324 | 485 SAT1_CF  | blue | na |
| chrUn | 37859340 | 37859995 | 656 SAT1_CF  | blue | na |
| chrUn | 37860014 | 37860498 | 485 SAT1_CF  | blue | na |
| chrUn | 37860525 | 37862353 | 1829 SAT1_CF | blue | na |
| chrUn | 37862366 | 37864672 | 2307 SAT1_CF | blue | na |
| chrUn | 37864684 | 37865914 | 1231 SAT1_CF | blue | na |
| chrUn | 37865957 | 37866468 | 512 SAT1_CF  | blue | na |
| chrUn | 37866496 | 37866652 | 157 SAT1_CF  | blue | na |
| chrUn | 37866678 | 37867319 | 642 SAT1_CF  | blue | na |
| chrUn | 37878518 | 37879156 | 639 SAT1_CF  | blue | na |
| chrUn | 37879177 | 37880111 | 935 SAT1_CF  | blue | na |
| chrUn | 37880143 | 37880662 | 520 SAT1_CF  | blue | na |
| chrUn | 37880676 | 37881215 | 540 SAT1_CF  | blue | na |
| chrUn | 37881258 | 37881935 | 678 SAT1_CF  | blue | na |
| chrUn | 37881947 | 37882575 | 629 SAT1_CF  | blue | na |
| chrUn | 37882655 | 37883325 | 671 SAT1_CF  | blue | na |
| chrUn | 37883345 | 37884542 | 1198 SAT1_CF | blue | na |
| chrUn | 37884587 | 37884744 | 158 SAT1_CF  | blue | na |
| chrUn | 37884772 | 37885930 | 1159 SAT1_CF | blue | na |
| chrUn | 37885942 | 37886764 | 823 SAT1_CF  | blue | na |
| chrUn | 37886776 | 37888022 | 1247 SAT1_CF | blue | na |
| chrUn | 37888065 | 37888321 | 257 SAT1_CF  | blue | na |
| chrUn | 37888355 | 37888869 | 515 SAT1_CF  | blue | na |
| chrUn | 37888916 | 37889052 | 137 SAT1_CF  | blue | na |
| chrUn | 37889080 | 37890944 | 1865 SAT1_CF | blue | na |
| chrUn | 37890987 | 37891663 | 677 SAT1_CF  | blue | na |
| chrUn | 37891675 | 37892175 | 501 SAT1_CF  | blue | na |
| chrUn | 37892241 | 37892378 | 138 SAT1_CF  | blue | na |
| chrUn | 37892405 | 37894097 | 1693 SAT1_CF | blue | na |
| chrUn | 37894154 | 37894649 | 496 SAT1_CF  | blue | na |
| chrUn | 37894675 | 37895723 | 1049 SAT1_CF | blue | na |
| chrUn | 37895761 | 37896302 | 542 SAT1_CF  | blue | na |
| chrUn | 37896344 | 37897204 | 861 SAT1_CF  | blue | na |
| chrUn | 37897216 | 37897769 | 554 SAT1_CF  | blue | na |
| chrUn | 37897812 | 37898374 | 563 SAT1_CF  | blue | na |
| chrUn | 37898439 | 37898981 | 543 SAT1_CF  | blue | na |



|       |          |          |              |      |    |
|-------|----------|----------|--------------|------|----|
| chrUn | 37899023 | 37899883 | 861 SAT1_CF  | blue | na |
| chrUn | 37899895 | 37900578 | 684 SAT1_CF  | blue | na |
| chrUn | 37900598 | 37901092 | 495 SAT1_CF  | blue | na |
| chrUn | 37901177 | 37901696 | 520 SAT1_CF  | blue | na |
| chrUn | 37903118 | 37903818 | 701 SAT1_CF  | blue | na |
| chrUn | 37903861 | 37904259 | 399 SAT1_CF  | blue | na |
| chrUn | 37904270 | 37904878 | 609 SAT1_CF  | blue | na |
| chrUn | 37904933 | 37906613 | 1681 SAT1_CF | blue | na |
| chrUn | 37906626 | 37908416 | 1791 SAT1_CF | blue | na |
| chrUn | 37908458 | 37909107 | 650 SAT1_CF  | blue | na |
| chrUn | 37909119 | 37909670 | 552 SAT1_CF  | blue | na |
| chrUn | 37909692 | 37909800 | 109 SAT1_CF  | blue | na |
| chrUn | 37909820 | 37910314 | 495 SAT1_CF  | blue | na |
| chrUn | 37910401 | 37910918 | 518 SAT1_CF  | blue | na |
| chrUn | 37912340 | 37912913 | 574 SAT1_CF  | blue | na |
| chrUn | 37912953 | 37913157 | 205 SAT1_CF  | blue | na |
| chrUn | 37913182 | 37914386 | 1205 SAT1_CF | blue | na |
| chrUn | 37914409 | 37914858 | 450 SAT1_CF  | blue | na |
| chrUn | 37914946 | 37915233 | 288 SAT1_CF  | blue | na |
| chrUn | 37915246 | 37915748 | 503 SAT1_CF  | blue | na |
| chrUn | 37915794 | 37916120 | 327 SAT1_CF  | blue | na |
| chrUn | 37916132 | 37917756 | 1625 SAT1_CF | blue | na |
| chrUn | 37917799 | 37918344 | 546 SAT1_CF  | blue | na |
| chrUn | 37918364 | 37918473 | 110 SAT1_CF  | blue | na |
| chrUn | 37918485 | 37919088 | 604 SAT1_CF  | blue | na |
| chrUn | 37919101 | 37919583 | 483 SAT1_CF  | blue | na |
| chrUn | 37919656 | 37922213 | 2558 SAT1_CF | blue | na |
| chrUn | 37922227 | 37923009 | 783 SAT1_CF  | blue | na |
| chrUn | 37923021 | 37923696 | 676 SAT1_CF  | blue | na |
| chrUn | 37923718 | 37924220 | 503 SAT1_CF  | blue | na |
| chrUn | 37924286 | 37924422 | 137 SAT1_CF  | blue | na |
| chrUn | 37924437 | 37927457 | 3021 SAT1_CF | blue | na |
| chrUn | 37927479 | 37927586 | 108 SAT1_CF  | blue | na |
| chrUn | 37927599 | 37929839 | 2241 SAT1_CF | blue | na |
| chrUn | 37929861 | 37931019 | 1159 SAT1_CF | blue | na |
| chrUn | 37931088 | 37931630 | 543 SAT1_CF  | blue | na |
| chrUn | 37931651 | 37931990 | 340 SAT1_CF  | blue | na |
| chrUn | 37932033 | 37932578 | 546 SAT1_CF  | blue | na |
| chrUn | 37932599 | 37932707 | 109 SAT1_CF  | blue | na |
| chrUn | 37932720 | 37933240 | 521 SAT1_CF  | blue | na |
| chrUn | 37933287 | 37933423 | 137 SAT1_CF  | blue | na |
| chrUn | 37933475 | 37934478 | 1004 SAT1_CF | blue | na |

|       |          |          |              |      |    |
|-------|----------|----------|--------------|------|----|
| chrUn | 37934522 | 37935484 | 963 SAT1_CF  | blue | na |
| chrUn | 37935527 | 37936193 | 667 SAT1_CF  | blue | na |
| chrUn | 37936206 | 37936907 | 702 SAT1_CF  | blue | na |
| chrUn | 37936972 | 37938373 | 1402 SAT1_CF | blue | na |
| chrUn | 37938386 | 37939468 | 1083 SAT1_CF | blue | na |
| chrUn | 37940469 | 37941319 | 851 CarSat1  | red  | na |
| chrUn | 37941335 | 37942055 | 721 CarSat1  | red  | na |
| chrUn | 37942071 | 37943030 | 960 CarSat1  | red  | na |
| chrUn | 37943057 | 37944264 | 1208 CarSat1 | red  | na |
| chrUn | 37944288 | 37944774 | 487 CarSat1  | red  | na |
| chrUn | 37944804 | 37946983 | 2180 CarSat1 | red  | na |
| chrUn | 37947013 | 37950154 | 3142 CarSat1 | red  | na |
| chrUn | 37950178 | 37952359 | 2182 CarSat1 | red  | na |
| chrUn | 37952383 | 37953093 | 711 CarSat1  | red  | na |
| chrUn | 37953117 | 37953830 | 714 CarSat1  | red  | na |
| chrUn | 37953854 | 37954814 | 961 CarSat1  | red  | na |
| chrUn | 37954835 | 37957685 | 2851 CarSat1 | red  | na |
| chrUn | 37958615 | 37964700 | 6086 CarSat1 | red  | na |
| chrUn | 37964724 | 37967651 | 2928 CarSat1 | red  | na |
| chrUn | 37967675 | 37969121 | 1447 CarSat1 | red  | na |
| chrUn | 37969137 | 37973577 | 4441 CarSat1 | red  | na |
| chrUn | 37973648 | 37978838 | 5191 CarSat1 | red  | na |
| chrUn | 37978868 | 37981700 | 2833 CarSat1 | red  | na |
| chrUn | 37984096 | 37986229 | 2134 CarSat1 | red  | na |
| chrUn | 37986263 | 37987703 | 1441 CarSat1 | red  | na |
| chrUn | 37987737 | 37989187 | 1451 CarSat1 | red  | na |
| chrUn | 37989211 | 37991905 | 2695 CarSat1 | red  | na |
| chrUn | 37991936 | 37993379 | 1444 CarSat1 | red  | na |
| chrUn | 37993409 | 37996804 | 3396 CarSat1 | red  | na |
| chrUn | 37996825 | 37997736 | 912 CarSat1  | red  | na |
| chrUn | 37998571 | 38000215 | 1645 CarSat1 | red  | na |
| chrUn | 38000230 | 38004341 | 4112 CarSat1 | red  | na |
| chrUn | 38005150 | 38008176 | 3027 CarSat1 | red  | na |
| chrUn | 38008253 | 38008979 | 727 CarSat1  | red  | na |
| chrUn | 38008994 | 38010171 | 1178 CarSat1 | red  | na |
| chrUn | 38010198 | 38010667 | 470 CarSat1  | red  | na |
| chrUn | 38010683 | 38011404 | 722 CarSat1  | red  | na |
| chrUn | 38011420 | 38011916 | 497 CarSat1  | red  | na |
| chrUn | 38011946 | 38012889 | 944 CarSat1  | red  | na |
| chrUn | 38012914 | 38014068 | 1155 CarSat1 | red  | na |
| chrUn | 38084503 | 38085930 | 1428 CarSat1 | red  | na |
| chrUn | 38087849 | 38087973 | 125 CarSat1  | red  | na |

|       |          |          |      |         |        |    |
|-------|----------|----------|------|---------|--------|----|
| chrUn | 38123303 | 38124391 | 1089 | Sat2CF  | purple | na |
| chrUn | 38123319 | 38124520 | 1202 | Sat2CF  | purple | na |
| chrUn | 38140084 | 38140252 | 169  | Sat2CF  | purple | na |
| chrUn | 38140121 | 38140951 | 831  | Sat2CF  | purple | na |
| chrUn | 38140142 | 38140867 | 726  | Sat2CF  | purple | na |
| chrUn | 38155853 | 38156696 | 844  | Sat2CF  | purple | na |
| chrUn | 38156716 | 38157223 | 508  | Sat2CF  | purple | na |
| chrUn | 38164629 | 38166540 | 1912 | CarSat1 | red    | na |
| chrUn | 38166561 | 38167276 | 716  | CarSat1 | red    | na |
| chrUn | 38167303 | 38168264 | 962  | CarSat1 | red    | na |
| chrUn | 38168280 | 38169216 | 937  | CarSat1 | red    | na |
| chrUn | 38169246 | 38169732 | 487  | CarSat1 | red    | na |
| chrUn | 38169756 | 38171424 | 1669 | CarSat1 | red    | na |
| chrUn | 38171454 | 38173631 | 2178 | CarSat1 | red    | na |
| chrUn | 38173648 | 38173771 | 124  | Carsat2 | orange | na |
| chrUn | 38173661 | 38177951 | 4291 | CarSat1 | red    | na |
| chrUn | 38178342 | 38179236 | 895  | CarSat1 | red    | na |
| chrUn | 38179260 | 38180710 | 1451 | CarSat1 | red    | na |
| chrUn | 38180734 | 38183875 | 3142 | CarSat1 | red    | na |
| chrUn | 38183905 | 38184613 | 709  | CarSat1 | red    | na |
| chrUn | 38184643 | 38185129 | 487  | CarSat1 | red    | na |
| chrUn | 38185153 | 38186817 | 1665 | CarSat1 | red    | na |
| chrUn | 38186847 | 38189542 | 2696 | CarSat1 | red    | na |
| chrUn | 38189566 | 38191012 | 1447 | CarSat1 | red    | na |
| chrUn | 38191264 | 38192008 | 745  | CarSat1 | red    | na |
| chrUn | 38193172 | 38194132 | 961  | CarSat1 | red    | na |
| chrUn | 38194156 | 38194869 | 714  | CarSat1 | red    | na |
| chrUn | 38194902 | 38195607 | 706  | CarSat1 | red    | na |
| chrUn | 38195631 | 38196342 | 712  | CarSat1 | red    | na |
| chrUn | 38196366 | 38197394 | 1029 | CarSat1 | red    | na |
| chrUn | 38197583 | 38198182 | 600  | CarSat1 | red    | na |
| chrUn | 38198371 | 38199774 | 1404 | CarSat1 | red    | na |
| chrUn | 38199804 | 38199865 | 62   | CarSat1 | red    | na |
| chrUn | 38200054 | 38205157 | 5104 | CarSat1 | red    | na |
| chrUn | 38205168 | 38206390 | 1223 | CarSat1 | red    | na |
| chrUn | 38206414 | 38207139 | 726  | CarSat1 | red    | na |
| chrUn | 38207155 | 38207623 | 469  | CarSat1 | red    | na |
| chrUn | 38207650 | 38209096 | 1447 | CarSat1 | red    | na |
| chrUn | 38209123 | 38209538 | 416  | CarSat1 | red    | na |
| chrUn | 38223950 | 38227299 | 3350 | CarSat1 | red    | na |
| chrUn | 38227332 | 38228037 | 706  | CarSat1 | red    | na |
| chrUn | 38228070 | 38229510 | 1441 | CarSat1 | red    | na |

|       |          |          |      |         |        |    |
|-------|----------|----------|------|---------|--------|----|
| chrUn | 38229534 | 38230246 | 713  | CarSat1 | red    | na |
| chrUn | 38230270 | 38230344 | 75   | CarSat1 | red    | na |
| chrUn | 38230539 | 38231506 | 968  | CarSat1 | red    | na |
| chrUn | 38231743 | 38232717 | 975  | CarSat1 | red    | na |
| chrUn | 38232741 | 38234927 | 2187 | CarSat1 | red    | na |
| chrUn | 38234960 | 38235886 | 927  | CarSat1 | red    | na |
| chrUn | 38235901 | 38236027 | 127  | Carsat2 | orange | na |
| chrUn | 38235916 | 38237362 | 1447 | CarSat1 | red    | na |
| chrUn | 38237392 | 38238840 | 1449 | CarSat1 | red    | na |
| chrUn | 38238870 | 38240318 | 1449 | CarSat1 | red    | na |
| chrUn | 38240348 | 38242534 | 2187 | CarSat1 | red    | na |
| chrUn | 38242564 | 38243271 | 708  | CarSat1 | red    | na |
| chrUn | 38243286 | 38243412 | 127  | Carsat2 | orange | na |
| chrUn | 38243301 | 38243785 | 485  | CarSat1 | red    | na |
| chrUn | 38243822 | 38244744 | 923  | CarSat1 | red    | na |
| chrUn | 38244759 | 38244885 | 127  | Carsat2 | orange | na |
| chrUn | 38244774 | 38245258 | 485  | CarSat1 | red    | na |
| chrUn | 38245295 | 38249068 | 3774 | CarSat1 | red    | na |
| chrUn | 38331713 | 38332256 | 544  | SAT1_CF | blue   | na |
| chrUn | 38332298 | 38333779 | 1482 | SAT1_CF | blue   | na |
| chrUn | 38333791 | 38334290 | 500  | SAT1_CF | blue   | na |
| chrUn | 38334301 | 38334699 | 399  | SAT1_CF | blue   | na |
| chrUn | 38334742 | 38335710 | 969  | SAT1_CF | blue   | na |
| chrUn | 38335753 | 38336717 | 965  | SAT1_CF | blue   | na |
| chrUn | 38336908 | 38337286 | 379  | SAT1_CF | blue   | na |
| chrUn | 38337304 | 38338393 | 1090 | SAT1_CF | blue   | na |
| chrUn | 38338433 | 38338835 | 403  | SAT1_CF | blue   | na |
| chrUn | 38338846 | 38339365 | 520  | SAT1_CF | blue   | na |
| chrUn | 38339398 | 38340806 | 1409 | SAT1_CF | blue   | na |
| chrUn | 38340876 | 38341549 | 674  | SAT1_CF | blue   | na |
| chrUn | 38341561 | 38342114 | 554  | SAT1_CF | blue   | na |
| chrUn | 38342157 | 38342682 | 526  | SAT1_CF | blue   | na |
| chrUn | 38342726 | 38344163 | 1438 | SAT1_CF | blue   | na |
| chrUn | 38344181 | 38344824 | 644  | SAT1_CF | blue   | na |
| chrUn | 38344837 | 38345598 | 762  | SAT1_CF | blue   | na |
| chrUn | 38345611 | 38346112 | 502  | SAT1_CF | blue   | na |
| chrUn | 38346199 | 38347386 | 1188 | SAT1_CF | blue   | na |
| chrUn | 38347428 | 38347972 | 545  | SAT1_CF | blue   | na |
| chrUn | 38348015 | 38348691 | 677  | SAT1_CF | blue   | na |
| chrUn | 38348704 | 38349277 | 574  | SAT1_CF | blue   | na |
| chrUn | 38349309 | 38349406 | 98   | SAT1_CF | blue   | na |
| chrUn | 38349419 | 38351300 | 1882 | SAT1_CF | blue   | na |

|       |          |          |              |      |    |
|-------|----------|----------|--------------|------|----|
| chrUn | 38351312 | 38352001 | 690 SAT1_CF  | blue | na |
| chrUn | 38352015 | 38352674 | 660 SAT1_CF  | blue | na |
| chrUn | 38352689 | 38353883 | 1195 SAT1_CF | blue | na |
| chrUn | 38353906 | 38354011 | 106 SAT1_CF  | blue | na |
| chrUn | 38354024 | 38354524 | 501 SAT1_CF  | blue | na |
| chrUn | 38354569 | 38356419 | 1851 SAT1_CF | blue | na |
| chrUn | 38356461 | 38357528 | 1068 SAT1_CF | blue | na |
| chrUn | 38357551 | 38357622 | 72 SAT1_CF   | blue | na |
| chrUn | 38357635 | 38358690 | 1056 SAT1_CF | blue | na |
| chrUn | 38358711 | 38358820 | 110 SAT1_CF  | blue | na |
| chrUn | 38358832 | 38359334 | 503 SAT1_CF  | blue | na |
| chrUn | 38359421 | 38360299 | 879 SAT1_CF  | blue | na |
| chrUn | 38360366 | 38361328 | 963 SAT1_CF  | blue | na |
| chrUn | 38361371 | 38361869 | 499 SAT1_CF  | blue | na |
| chrUn | 38361891 | 38362565 | 675 SAT1_CF  | blue | na |
| chrUn | 38362588 | 38362694 | 107 SAT1_CF  | blue | na |
| chrUn | 38362706 | 38363208 | 503 SAT1_CF  | blue | na |
| chrUn | 38363274 | 38363410 | 137 SAT1_CF  | blue | na |
| chrUn | 38363438 | 38364084 | 647 SAT1_CF  | blue | na |
| chrUn | 38365337 | 38366033 | 697 SAT1_CF  | blue | na |
| chrUn | 38366053 | 38366601 | 549 SAT1_CF  | blue | na |
| chrUn | 38366614 | 38367505 | 892 SAT1_CF  | blue | na |
| chrUn | 38367517 | 38368035 | 519 SAT1_CF  | blue | na |
| chrUn | 38368107 | 38369738 | 1632 SAT1_CF | blue | na |
| chrUn | 38369780 | 38370516 | 737 SAT1_CF  | blue | na |
| chrUn | 38370535 | 38371125 | 591 SAT1_CF  | blue | na |
| chrUn | 38371212 | 38371543 | 332 SAT1_CF  | blue | na |
| chrUn | 38371576 | 38373167 | 1592 SAT1_CF | blue | na |
| chrUn | 38373182 | 38373341 | 160 SAT1_CF  | blue | na |
| chrUn | 38373650 | 38373888 | 239 SAT1_CF  | blue | na |
| chrUn | 38373902 | 38374231 | 330 SAT1_CF  | blue | na |
| chrUn | 38374271 | 38374940 | 670 SAT1_CF  | blue | na |
| chrUn | 38374954 | 38375444 | 491 SAT1_CF  | blue | na |
| chrUn | 38375457 | 38375966 | 510 SAT1_CF  | blue | na |
| chrUn | 38375980 | 38376858 | 879 SAT1_CF  | blue | na |
| chrUn | 38376906 | 38377568 | 663 SAT1_CF  | blue | na |
| chrUn | 38377602 | 38378095 | 494 SAT1_CF  | blue | na |
| chrUn | 38378182 | 38378697 | 516 SAT1_CF  | blue | na |
| chrUn | 38378769 | 38379299 | 531 SAT1_CF  | blue | na |
| chrUn | 38379461 | 38380429 | 969 SAT1_CF  | blue | na |
| chrUn | 38380478 | 38381722 | 1245 SAT1_CF | blue | na |
| chrUn | 38381743 | 38381851 | 109 SAT1_CF  | blue | na |

|       |          |          |              |      |    |
|-------|----------|----------|--------------|------|----|
| chrUn | 38381864 | 38382366 | 503 SAT1_CF  | blue | na |
| chrUn | 38382411 | 38383324 | 914 SAT1_CF  | blue | na |
| chrUn | 38383368 | 38383669 | 302 SAT1_CF  | blue | na |
| chrUn | 38383717 | 38385051 | 1335 SAT1_CF | blue | na |
| chrUn | 38385064 | 38385585 | 522 SAT1_CF  | blue | na |
| chrUn | 38385604 | 38385871 | 268 SAT1_CF  | blue | na |
| chrUn | 38385916 | 38387162 | 1247 SAT1_CF | blue | na |
| chrUn | 38387174 | 38387724 | 551 SAT1_CF  | blue | na |
| chrUn | 38387829 | 38388756 | 928 SAT1_CF  | blue | na |
| chrUn | 38388768 | 38389451 | 684 SAT1_CF  | blue | na |
| chrUn | 38389463 | 38391643 | 2181 SAT1_CF | blue | na |
| chrUn | 38391706 | 38392264 | 559 SAT1_CF  | blue | na |
| chrUn | 38392324 | 38393668 | 1345 SAT1_CF | blue | na |
| chrUn | 38393695 | 38394326 | 632 SAT1_CF  | blue | na |
| chrUn | 38394369 | 38395033 | 665 SAT1_CF  | blue | na |
| chrUn | 38395053 | 38395548 | 496 SAT1_CF  | blue | na |
| chrUn | 38395601 | 38396545 | 945 SAT1_CF  | blue | na |
| chrUn | 38396570 | 38397387 | 818 SAT1_CF  | blue | na |
| chrUn | 38397415 | 38397608 | 194 SAT1_CF  | blue | na |
| chrUn | 38397639 | 38398159 | 521 SAT1_CF  | blue | na |
| chrUn | 38398215 | 38398373 | 159 SAT1_CF  | blue | na |
| chrUn | 38398525 | 38399291 | 767 SAT1_CF  | blue | na |
| chrUn | 38399483 | 38399893 | 411 SAT1_CF  | blue | na |
| chrUn | 38399913 | 38400386 | 474 SAT1_CF  | blue | na |
| chrUn | 38400451 | 38400545 | 95 SAT1_CF   | blue | na |
| chrUn | 38470017 | 38470210 | 194 SAT1_CF  | blue | na |
| chrUn | 38470435 | 38471166 | 732 SAT1_CF  | blue | na |
| chrUn | 38471184 | 38473256 | 2073 SAT1_CF | blue | na |
| chrUn | 38473438 | 38473619 | 182 SAT1_CF  | blue | na |
| chrUn | 38473659 | 38474159 | 501 SAT1_CF  | blue | na |
| chrUn | 38474172 | 38474277 | 106 SAT1_CF  | blue | na |
| chrUn | 38474300 | 38475108 | 809 SAT1_CF  | blue | na |
| chrUn | 38475125 | 38475648 | 524 SAT1_CF  | blue | na |
| chrUn | 38475663 | 38475799 | 137 SAT1_CF  | blue | na |
| chrUn | 38475865 | 38476977 | 1113 SAT1_CF | blue | na |
| chrUn | 38477058 | 38477581 | 524 SAT1_CF  | blue | na |
| chrUn | 38477596 | 38477752 | 157 SAT1_CF  | blue | na |
| chrUn | 38477797 | 38478297 | 501 SAT1_CF  | blue | na |
| chrUn | 38478310 | 38478984 | 675 SAT1_CF  | blue | na |
| chrUn | 38479027 | 38481018 | 1992 SAT1_CF | blue | na |
| chrUn | 38481135 | 38481669 | 535 SAT1_CF  | blue | na |
| chrUn | 38481689 | 38481796 | 108 SAT1_CF  | blue | na |

|       |          |          |              |      |    |
|-------|----------|----------|--------------|------|----|
| chrUn | 38481817 | 38482387 | 571 SAT1_CF  | blue | na |
| chrUn | 38482399 | 38483471 | 1073 SAT1_CF | blue | na |
| chrUn | 38483483 | 38485883 | 2401 SAT1_CF | blue | na |
| chrUn | 38485895 | 38487252 | 1358 SAT1_CF | blue | na |
| chrUn | 38487265 | 38487617 | 353 SAT1_CF  | blue | na |
| chrUn | 38487733 | 38488252 | 520 SAT1_CF  | blue | na |
| chrUn | 38488309 | 38489475 | 1167 SAT1_CF | blue | na |
| chrUn | 38489564 | 38490064 | 501 SAT1_CF  | blue | na |
| chrUn | 38490077 | 38490780 | 704 SAT1_CF  | blue | na |
| chrUn | 38490791 | 38491395 | 605 SAT1_CF  | blue | na |
| chrUn | 38491438 | 38491982 | 545 SAT1_CF  | blue | na |
| chrUn | 38492115 | 38492811 | 697 SAT1_CF  | blue | na |
| chrUn | 38492876 | 38493033 | 158 SAT1_CF  | blue | na |
| chrUn | 38493078 | 38493578 | 501 SAT1_CF  | blue | na |
| chrUn | 38493605 | 38494272 | 668 SAT1_CF  | blue | na |
| chrUn | 38494284 | 38494961 | 678 SAT1_CF  | blue | na |
| chrUn | 38495004 | 38497284 | 2281 SAT1_CF | blue | na |
| chrUn | 38497328 | 38498988 | 1661 SAT1_CF | blue | na |
| chrUn | 38499015 | 38499578 | 564 SAT1_CF  | blue | na |
| chrUn | 38499658 | 38502106 | 2449 SAT1_CF | blue | na |
| chrUn | 38502148 | 38502968 | 821 SAT1_CF  | blue | na |
| chrUn | 38503000 | 38503522 | 523 SAT1_CF  | blue | na |
| chrUn | 38503533 | 38503767 | 235 SAT1_CF  | blue | na |
| chrUn | 38503947 | 38504114 | 168 SAT1_CF  | blue | na |
| chrUn | 38504188 | 38504659 | 472 SAT1_CF  | blue | na |
| chrUn | 38504682 | 38506004 | 1323 SAT1_CF | blue | na |
| chrUn | 38506019 | 38506176 | 158 SAT1_CF  | blue | na |
| chrUn | 38506202 | 38509119 | 2918 SAT1_CF | blue | na |
| chrUn | 38509200 | 38509366 | 167 SAT1_CF  | blue | na |
| chrUn | 38509548 | 38509732 | 185 SAT1_CF  | blue | na |
| chrUn | 38509768 | 38510266 | 499 SAT1_CF  | blue | na |
| chrUn | 38510279 | 38510385 | 107 SAT1_CF  | blue | na |
| chrUn | 38510408 | 38511361 | 954 SAT1_CF  | blue | na |
| chrUn | 38511401 | 38511899 | 499 SAT1_CF  | blue | na |
| chrUn | 38511911 | 38513621 | 1711 SAT1_CF | blue | na |
| chrUn | 38513649 | 38513805 | 157 SAT1_CF  | blue | na |
| chrUn | 38513850 | 38514350 | 501 SAT1_CF  | blue | na |
| chrUn | 38514363 | 38515122 | 760 SAT1_CF  | blue | na |
| chrUn | 38515147 | 38515992 | 846 SAT1_CF  | blue | na |
| chrUn | 38516035 | 38516817 | 783 SAT1_CF  | blue | na |
| chrUn | 38516897 | 38517442 | 546 SAT1_CF  | blue | na |
| chrUn | 38517453 | 38517806 | 354 SAT1_CF  | blue | na |

|       |          |          |              |        |    |
|-------|----------|----------|--------------|--------|----|
| chrUn | 38517922 | 38518442 | 521 SAT1_CF  | blue   | na |
| chrUn | 38518473 | 38518634 | 162 SAT1_CF  | blue   | na |
| chrUn | 38518695 | 38520081 | 1387 SAT1_CF | blue   | na |
| chrUn | 38520115 | 38520494 | 380 SAT1_CF  | blue   | na |
| chrUn | 38520534 | 38521035 | 502 SAT1_CF  | blue   | na |
| chrUn | 38521057 | 38521160 | 104 SAT1_CF  | blue   | na |
| chrUn | 38521325 | 38521988 | 664 SAT1_CF  | blue   | na |
| chrUn | 38522005 | 38523193 | 1189 SAT1_CF | blue   | na |
| chrUn | 38523281 | 38523478 | 198 SAT1_CF  | blue   | na |
| chrUn | 38523499 | 38524020 | 522 SAT1_CF  | blue   | na |
| chrUn | 38524033 | 38524384 | 352 SAT1_CF  | blue   | na |
| chrUn | 38524437 | 38524937 | 501 SAT1_CF  | blue   | na |
| chrUn | 38524959 | 38526020 | 1062 SAT1_CF | blue   | na |
| chrUn | 38526046 | 38526527 | 482 SAT1_CF  | blue   | na |
| chrUn | 38526554 | 38529090 | 2537 SAT1_CF | blue   | na |
| chrUn | 38529111 | 38530046 | 936 SAT1_CF  | blue   | na |
| chrUn | 38530067 | 38530589 | 523 SAT1_CF  | blue   | na |
| chrUn | 38530602 | 38531283 | 682 SAT1_CF  | blue   | na |
| chrUn | 38531295 | 38532057 | 763 SAT1_CF  | blue   | na |
| chrUn | 38532069 | 38532770 | 702 SAT1_CF  | blue   | na |
| chrUn | 38532850 | 38533809 | 960 SAT1_CF  | blue   | na |
| chrUn | 38533869 | 38534351 | 483 SAT1_CF  | blue   | na |
| chrUn | 38534363 | 38535040 | 678 SAT1_CF  | blue   | na |
| chrUn | 38535083 | 38535711 | 629 SAT1_CF  | blue   | na |
| chrUn | 38535739 | 38536537 | 799 SAT1_CF  | blue   | na |
| chrUn | 38541124 | 38542021 | 898 Sat2CF   | purple | na |
| chrUn | 38541169 | 38541958 | 790 Sat2CF   | purple | na |
| chrUn | 38568308 | 38569559 | 1252 Sat2CF  | purple | na |
| chrUn | 38593350 | 38593844 | 495 CarSat1  | red    | na |
| chrUn | 38594029 | 38594253 | 225 CarSat1  | red    | na |
| chrUn | 38594401 | 38595860 | 1460 CarSat1 | red    | na |
| chrUn | 38595881 | 38598942 | 3062 CarSat1 | red    | na |
| chrUn | 38598963 | 38600202 | 1240 CarSat1 | red    | na |
| chrUn | 38600205 | 38602075 | 1871 SAT1_CF | blue   | na |
| chrUn | 38605596 | 38606844 | 1249 SAT1_CF | blue   | na |
| chrUn | 38606873 | 38606971 | 99 SAT1_CF   | blue   | na |
| chrUn | 38606993 | 38607539 | 547 SAT1_CF  | blue   | na |
| chrUn | 38607552 | 38608197 | 646 SAT1_CF  | blue   | na |
| chrUn | 38608241 | 38609399 | 1159 SAT1_CF | blue   | na |
| chrUn | 38609444 | 38609945 | 502 SAT1_CF  | blue   | na |
| chrUn | 38609957 | 38610065 | 109 SAT1_CF  | blue   | na |
| chrUn | 38610088 | 38610643 | 556 SAT1_CF  | blue   | na |



|       |          |          |              |      |    |
|-------|----------|----------|--------------|------|----|
| chrUn | 38610655 | 38611333 | 679 SAT1_CF  | blue | na |
| chrUn | 38611378 | 38613419 | 2042 SAT1_CF | blue | na |
| chrUn | 38613460 | 38613961 | 502 SAT1_CF  | blue | na |
| chrUn | 38613974 | 38614648 | 675 SAT1_CF  | blue | na |
| chrUn | 38614691 | 38615322 | 632 SAT1_CF  | blue | na |
| chrUn | 38615350 | 38616546 | 1197 SAT1_CF | blue | na |
| chrUn | 38616606 | 38620559 | 3954 SAT1_CF | blue | na |
| chrUn | 38620582 | 38621940 | 1359 SAT1_CF | blue | na |
| chrUn | 38621953 | 38622124 | 172 SAT1_CF  | blue | na |
| chrUn | 38622166 | 38623779 | 1614 SAT1_CF | blue | na |
| chrUn | 38623826 | 38624347 | 522 SAT1_CF  | blue | na |
| chrUn | 38624360 | 38624966 | 607 SAT1_CF  | blue | na |
| chrUn | 38624978 | 38625086 | 109 SAT1_CF  | blue | na |
| chrUn | 38625106 | 38625885 | 780 SAT1_CF  | blue | na |
| chrUn | 38625913 | 38627682 | 1770 SAT1_CF | blue | na |
| chrUn | 38627735 | 38628237 | 503 SAT1_CF  | blue | na |
| chrUn | 38628249 | 38628321 | 73 SAT1_CF   | blue | na |
| chrUn | 38628378 | 38629663 | 1286 SAT1_CF | blue | na |
| chrUn | 38629674 | 38631385 | 1712 SAT1_CF | blue | na |
| chrUn | 38631397 | 38632073 | 677 SAT1_CF  | blue | na |
| chrUn | 38632085 | 38632258 | 174 SAT1_CF  | blue | na |
| chrUn | 38632300 | 38634156 | 1857 SAT1_CF | blue | na |
| chrUn | 38634196 | 38634771 | 576 SAT1_CF  | blue | na |
| chrUn | 38634793 | 38635467 | 675 SAT1_CF  | blue | na |
| chrUn | 38635479 | 38636162 | 684 SAT1_CF  | blue | na |
| chrUn | 38636204 | 38637054 | 851 SAT1_CF  | blue | na |
| chrUn | 38637124 | 38637669 | 546 SAT1_CF  | blue | na |
| chrUn | 38637712 | 38638343 | 632 SAT1_CF  | blue | na |
| chrUn | 38638371 | 38639030 | 660 SAT1_CF  | blue | na |
| chrUn | 38639048 | 38639550 | 503 SAT1_CF  | blue | na |
| chrUn | 38639583 | 38640368 | 786 SAT1_CF  | blue | na |
| chrUn | 38640429 | 38640983 | 555 SAT1_CF  | blue | na |
| chrUn | 38641001 | 38641675 | 675 SAT1_CF  | blue | na |
| chrUn | 38641772 | 38642314 | 543 SAT1_CF  | blue | na |
| chrUn | 38642358 | 38642897 | 540 SAT1_CF  | blue | na |
| chrUn | 38642928 | 38643453 | 526 SAT1_CF  | blue | na |
| chrUn | 38643468 | 38643603 | 136 SAT1_CF  | blue | na |
| chrUn | 38643688 | 38644170 | 483 SAT1_CF  | blue | na |
| chrUn | 38644183 | 38644288 | 106 SAT1_CF  | blue | na |
| chrUn | 38644311 | 38644865 | 555 SAT1_CF  | blue | na |
| chrUn | 38644878 | 38645553 | 676 SAT1_CF  | blue | na |
| chrUn | 38645596 | 38646606 | 1011 SAT1_CF | blue | na |

|       |          |          |              |      |    |
|-------|----------|----------|--------------|------|----|
| chrUn | 38646687 | 38647647 | 961 SAT1_CF  | blue | na |
| chrUn | 38647687 | 38648308 | 622 SAT1_CF  | blue | na |
| chrUn | 38648332 | 38648838 | 507 SAT1_CF  | blue | na |
| chrUn | 38648858 | 38649465 | 608 SAT1_CF  | blue | na |
| chrUn | 38649478 | 38649880 | 403 SAT1_CF  | blue | na |
| chrUn | 38649920 | 38650495 | 576 SAT1_CF  | blue | na |
| chrUn | 38650517 | 38650615 | 99 SAT1_CF   | blue | na |
| chrUn | 38650636 | 38651191 | 556 SAT1_CF  | blue | na |
| chrUn | 38651203 | 38652065 | 863 SAT1_CF  | blue | na |
| chrUn | 38652107 | 38652738 | 632 SAT1_CF  | blue | na |
| chrUn | 38652766 | 38653329 | 564 SAT1_CF  | blue | na |
| chrUn | 38653506 | 38654208 | 703 SAT1_CF  | blue | na |
| chrUn | 38654227 | 38654747 | 521 SAT1_CF  | blue | na |
| chrUn | 38654760 | 38656313 | 1554 SAT1_CF | blue | na |
| chrUn | 38656355 | 38657857 | 1503 SAT1_CF | blue | na |
| chrUn | 38657879 | 38658748 | 870 SAT1_CF  | blue | na |
| chrUn | 38658761 | 38658867 | 107 SAT1_CF  | blue | na |
| chrUn | 38658890 | 38659464 | 575 SAT1_CF  | blue | na |
| chrUn | 38659477 | 38661000 | 1524 SAT1_CF | blue | na |
| chrUn | 38661042 | 38661586 | 545 SAT1_CF  | blue | na |
| chrUn | 38661602 | 38663393 | 1792 SAT1_CF | blue | na |
| chrUn | 38663416 | 38663851 | 436 SAT1_CF  | blue | na |
| chrUn | 38663865 | 38663972 | 108 SAT1_CF  | blue | na |
| chrUn | 38663994 | 38664274 | 281 SAT1_CF  | blue | na |
| chrUn | 38664457 | 38664737 | 281 SAT1_CF  | blue | na |
| chrUn | 38664750 | 38666370 | 1621 SAT1_CF | blue | na |
| chrUn | 38666403 | 38666782 | 380 SAT1_CF  | blue | na |
| chrUn | 38666822 | 38667324 | 503 SAT1_CF  | blue | na |
| chrUn | 38667336 | 38667989 | 654 SAT1_CF  | blue | na |
| chrUn | 38668046 | 38668774 | 729 SAT1_CF  | blue | na |
| chrUn | 38668816 | 38670626 | 1811 SAT1_CF | blue | na |
| chrUn | 38670694 | 38671214 | 521 SAT1_CF  | blue | na |
| chrUn | 38671226 | 38671339 | 114 SAT1_CF  | blue | na |
| chrUn | 38671356 | 38671782 | 427 SAT1_CF  | blue | na |
| chrUn | 38672783 | 38673598 | 816 CarSat1  | red  | na |
| chrUn | 38673614 | 38674844 | 1231 CarSat1 | red  | na |
| chrUn | 38674874 | 38676055 | 1182 CarSat1 | red  | na |
| chrUn | 38676077 | 38676789 | 713 CarSat1  | red  | na |
| chrUn | 38676816 | 38677524 | 709 CarSat1  | red  | na |
| chrUn | 38677551 | 38678999 | 1449 CarSat1 | red  | na |
| chrUn | 38679026 | 38679486 | 461 CarSat1  | red  | na |
| chrUn | 38679518 | 38680468 | 951 CarSat1  | red  | na |

|       |          |          |      |         |     |    |
|-------|----------|----------|------|---------|-----|----|
| chrUn | 38680495 | 38681198 | 704  | CarSat1 | red | na |
| chrUn | 38681225 | 38682671 | 1447 | CarSat1 | red | na |
| chrUn | 38682698 | 38683905 | 1208 | CarSat1 | red | na |
| chrUn | 38683921 | 38684633 | 713  | CarSat1 | red | na |
| chrUn | 38684658 | 38685620 | 963  | CarSat1 | red | na |
| chrUn | 38685647 | 38687091 | 1445 | CarSat1 | red | na |
| chrUn | 38687119 | 38687579 | 461  | CarSat1 | red | na |
| chrUn | 38687604 | 38688566 | 963  | CarSat1 | red | na |
| chrUn | 38688593 | 38689570 | 978  | CarSat1 | red | na |
| chrUn | 38691184 | 38692255 | 1072 | CarSat1 | red | na |
| chrUn | 38692282 | 38693488 | 1207 | CarSat1 | red | na |
| chrUn | 38693504 | 38695208 | 1705 | CarSat1 | red | na |
| chrUn | 38695230 | 38696944 | 1715 | CarSat1 | red | na |
| chrUn | 38696969 | 38697601 | 633  | CarSat1 | red | na |
| chrUn | 38697628 | 38698097 | 470  | CarSat1 | red | na |
| chrUn | 38698113 | 38699074 | 962  | CarSat1 | red | na |
| chrUn | 38699101 | 38703256 | 4156 | CarSat1 | red | na |
| chrUn | 38703272 | 38704503 | 1232 | CarSat1 | red | na |
| chrUn | 38705125 | 38706944 | 1820 | CarSat1 | red | na |
| chrUn | 38706960 | 38708418 | 1459 | CarSat1 | red | na |
| chrUn | 38708445 | 38709106 | 662  | CarSat1 | red | na |
| chrUn | 38709607 | 38712102 | 2496 | CarSat1 | red | na |
| chrUn | 38712118 | 38713578 | 1461 | CarSat1 | red | na |
| chrUn | 38713594 | 38714555 | 962  | CarSat1 | red | na |
| chrUn | 38714582 | 38716030 | 1449 | CarSat1 | red | na |
| chrUn | 38716071 | 38716767 | 697  | CarSat1 | red | na |
| chrUn | 38716794 | 38717504 | 711  | CarSat1 | red | na |
| chrUn | 38717531 | 38718241 | 711  | CarSat1 | red | na |
| chrUn | 38718268 | 38718977 | 710  | CarSat1 | red | na |
| chrUn | 38719004 | 38719711 | 708  | CarSat1 | red | na |
| chrUn | 38719738 | 38721181 | 1444 | CarSat1 | red | na |
| chrUn | 38721208 | 38722656 | 1449 | CarSat1 | red | na |
| chrUn | 38722683 | 38723151 | 469  | CarSat1 | red | na |
| chrUn | 38723167 | 38724130 | 964  | CarSat1 | red | na |
| chrUn | 38724157 | 38724866 | 710  | CarSat1 | red | na |
| chrUn | 38724908 | 38725602 | 695  | CarSat1 | red | na |
| chrUn | 38725629 | 38726337 | 709  | CarSat1 | red | na |
| chrUn | 38726379 | 38729554 | 3176 | CarSat1 | red | na |
| chrUn | 38729567 | 38730128 | 562  | CarSat1 | red | na |
| chrUn | 38732024 | 38732942 | 919  | CarSat1 | red | na |
| chrUn | 38749814 | 38750397 | 584  | CarSat1 | red | na |
| chrUn | 38750424 | 38751135 | 712  | CarSat1 | red | na |

|       |          |          |      |         |      |    |
|-------|----------|----------|------|---------|------|----|
| chrUn | 38751162 | 38752878 | 1717 | CarSat1 | red  | na |
| chrUn | 38752908 | 38754582 | 1675 | CarSat1 | red  | na |
| chrUn | 38754598 | 38755306 | 709  | CarSat1 | red  | na |
| chrUn | 38755331 | 38756291 | 961  | CarSat1 | red  | na |
| chrUn | 38756318 | 38757029 | 712  | CarSat1 | red  | na |
| chrUn | 38757056 | 38757768 | 713  | CarSat1 | red  | na |
| chrUn | 38757795 | 38758505 | 711  | CarSat1 | red  | na |
| chrUn | 38758532 | 38759000 | 469  | CarSat1 | red  | na |
| chrUn | 38759016 | 38760351 | 1336 | CarSat1 | red  | na |
| chrUn | 38847035 | 38848021 | 987  | SAT1_CF | blue | na |
| chrUn | 38848033 | 38848889 | 857  | SAT1_CF | blue | na |
| chrUn | 38848915 | 38849898 | 984  | SAT1_CF | blue | na |
| chrUn | 38849940 | 38850485 | 546  | SAT1_CF | blue | na |
| chrUn | 38850508 | 38851307 | 800  | SAT1_CF | blue | na |
| chrUn | 38851320 | 38851799 | 480  | SAT1_CF | blue | na |
| chrUn | 38851861 | 38852794 | 934  | SAT1_CF | blue | na |
| chrUn | 38852825 | 38853679 | 855  | SAT1_CF | blue | na |
| chrUn | 38853759 | 38854615 | 857  | SAT1_CF | blue | na |
| chrUn | 38854627 | 38855207 | 581  | SAT1_CF | blue | na |
| chrUn | 38855303 | 38855469 | 167  | SAT1_CF | blue | na |
| chrUn | 38855488 | 38856021 | 534  | SAT1_CF | blue | na |
| chrUn | 38856068 | 38856917 | 850  | SAT1_CF | blue | na |
| chrUn | 38856959 | 38857504 | 546  | SAT1_CF | blue | na |
| chrUn | 38857526 | 38858164 | 639  | SAT1_CF | blue | na |
| chrUn | 38858232 | 38858731 | 500  | SAT1_CF | blue | na |
| chrUn | 38858821 | 38860848 | 2028 | SAT1_CF | blue | na |
| chrUn | 38860860 | 38861828 | 969  | SAT1_CF | blue | na |
| chrUn | 38861841 | 38862362 | 522  | SAT1_CF | blue | na |
| chrUn | 38862377 | 38862955 | 579  | SAT1_CF | blue | na |
| chrUn | 38864369 | 38864795 | 427  | SAT1_CF | blue | na |
| chrUn | 38864862 | 38865403 | 542  | SAT1_CF | blue | na |
| chrUn | 38865473 | 38866149 | 677  | SAT1_CF | blue | na |
| chrUn | 38866161 | 38866666 | 506  | SAT1_CF | blue | na |
| chrUn | 38866698 | 38867506 | 809  | SAT1_CF | blue | na |
| chrUn | 38867551 | 38868219 | 669  | SAT1_CF | blue | na |
| chrUn | 38868237 | 38868999 | 763  | SAT1_CF | blue | na |
| chrUn | 38869019 | 38870148 | 1130 | SAT1_CF | blue | na |
| chrUn | 38870167 | 38871362 | 1196 | SAT1_CF | blue | na |
| chrUn | 38871376 | 38871876 | 501  | SAT1_CF | blue | na |
| chrUn | 38871966 | 38873438 | 1473 | SAT1_CF | blue | na |
| chrUn | 38873483 | 38874158 | 676  | SAT1_CF | blue | na |
| chrUn | 38874170 | 38874856 | 687  | SAT1_CF | blue | na |

|       |          |          |              |      |    |
|-------|----------|----------|--------------|------|----|
| chrUn | 38874874 | 38875734 | 861 SAT1_CF  | blue | na |
| chrUn | 38875758 | 38876386 | 629 SAT1_CF  | blue | na |
| chrUn | 38876410 | 38876516 | 107 SAT1_CF  | blue | na |
| chrUn | 38876528 | 38877030 | 503 SAT1_CF  | blue | na |
| chrUn | 38877117 | 38878447 | 1331 SAT1_CF | blue | na |
| chrUn | 38878493 | 38879825 | 1333 SAT1_CF | blue | na |
| chrUn | 38879837 | 38880597 | 761 SAT1_CF  | blue | na |
| chrUn | 38880609 | 38881162 | 554 SAT1_CF  | blue | na |
| chrUn | 38881184 | 38881291 | 108 SAT1_CF  | blue | na |
| chrUn | 38881304 | 38881806 | 503 SAT1_CF  | blue | na |
| chrUn | 38881846 | 38882248 | 403 SAT1_CF  | blue | na |
| chrUn | 38882262 | 38882769 | 508 SAT1_CF  | blue | na |
| chrUn | 38882811 | 38883628 | 818 SAT1_CF  | blue | na |
| chrUn | 38883679 | 38884531 | 853 SAT1_CF  | blue | na |
| chrUn | 38884543 | 38885155 | 613 SAT1_CF  | blue | na |
| chrUn | 38885168 | 38885649 | 482 SAT1_CF  | blue | na |
| chrUn | 38885705 | 38885890 | 186 SAT1_CF  | blue | na |
| chrUn | 38886070 | 38886235 | 166 SAT1_CF  | blue | na |
| chrUn | 38886315 | 38886965 | 651 SAT1_CF  | blue | na |
| chrUn | 38886977 | 38888110 | 1134 SAT1_CF | blue | na |
| chrUn | 38888123 | 38888644 | 522 SAT1_CF  | blue | na |
| chrUn | 38888663 | 38889577 | 915 SAT1_CF  | blue | na |
| chrUn | 38889644 | 38891249 | 1606 SAT1_CF | blue | na |
| chrUn | 38891280 | 38891864 | 585 SAT1_CF  | blue | na |
| chrUn | 38891877 | 38892739 | 863 SAT1_CF  | blue | na |
| chrUn | 38892751 | 38893921 | 1171 SAT1_CF | blue | na |
| chrUn | 38893977 | 38894563 | 587 SAT1_CF  | blue | na |
| chrUn | 38894605 | 38895006 | 402 SAT1_CF  | blue | na |
| chrUn | 38895017 | 38895104 | 88 SAT1_CF   | blue | na |
| chrUn | 38895202 | 38895876 | 675 SAT1_CF  | blue | na |
| chrUn | 38895888 | 38896569 | 682 SAT1_CF  | blue | na |
| chrUn | 38896582 | 38897064 | 483 SAT1_CF  | blue | na |
| chrUn | 38897128 | 38897525 | 398 SAT1_CF  | blue | na |
| chrUn | 38897539 | 38898045 | 507 SAT1_CF  | blue | na |
| chrUn | 38898089 | 38899030 | 942 SAT1_CF  | blue | na |
| chrUn | 38899079 | 38899752 | 674 SAT1_CF  | blue | na |
| chrUn | 38899770 | 38901837 | 2068 SAT1_CF | blue | na |
| chrUn | 38901880 | 38902555 | 676 SAT1_CF  | blue | na |
| chrUn | 38902567 | 38903198 | 632 SAT1_CF  | blue | na |
| chrUn | 38903219 | 38903328 | 110 SAT1_CF  | blue | na |
| chrUn | 38903340 | 38903842 | 503 SAT1_CF  | blue | na |
| chrUn | 38903929 | 38904601 | 673 SAT1_CF  | blue | na |

|       |          |          |              |      |    |
|-------|----------|----------|--------------|------|----|
| chrUn | 38904613 | 38905196 | 584 SAT1_CF  | blue | na |
| chrUn | 38905239 | 38906351 | 1113 SAT1_CF | blue | na |
| chrUn | 38906394 | 38906939 | 546 SAT1_CF  | blue | na |
| chrUn | 38906958 | 38907728 | 771 SAT1_CF  | blue | na |
| chrUn | 38907748 | 38908240 | 493 SAT1_CF  | blue | na |
| chrUn | 38908327 | 38909586 | 1260 SAT1_CF | blue | na |
| chrUn | 38909600 | 38910282 | 683 SAT1_CF  | blue | na |
| chrUn | 38910294 | 38910795 | 502 SAT1_CF  | blue | na |
| chrUn | 38910848 | 38911167 | 320 SAT1_CF  | blue | na |
| chrUn | 38911178 | 38912866 | 1689 SAT1_CF | blue | na |
| chrUn | 38961295 | 38963335 | 2041 CarSat1 | red  | na |
| chrUn | 38963326 | 38964372 | 1047 SAT1_CF | blue | na |
| chrUn | 38964415 | 38964831 | 417 SAT1_CF  | blue | na |
| chrUn | 38967505 | 38967733 | 229 SAT1_CF  | blue | na |
| chrUn | 38967804 | 38970680 | 2877 SAT1_CF | blue | na |
| chrUn | 38970704 | 38972097 | 1394 SAT1_CF | blue | na |
| chrUn | 38972141 | 38972618 | 478 SAT1_CF  | blue | na |
| chrUn | 38972652 | 38974417 | 1766 SAT1_CF | blue | na |
| chrUn | 38974429 | 38975107 | 679 SAT1_CF  | blue | na |
| chrUn | 38975150 | 38977772 | 2623 SAT1_CF | blue | na |
| chrUn | 38977767 | 38978478 | 712 CarSat1  | red  | na |
| chrUn | 38978509 | 38978932 | 424 CarSat1  | red  | na |
| chrUn | 38985624 | 38986387 | 764 SAT1_CF  | blue | na |
| chrUn | 38986409 | 38987308 | 900 SAT1_CF  | blue | na |
| chrUn | 38987336 | 38989786 | 2451 SAT1_CF | blue | na |
| chrUn | 38989803 | 38990318 | 516 SAT1_CF  | blue | na |
| chrUn | 38990997 | 38991637 | 641 SAT1_CF  | blue | na |
| chrUn | 38991677 | 38992177 | 501 SAT1_CF  | blue | na |
| chrUn | 38992190 | 38994215 | 2026 SAT1_CF | blue | na |
| chrUn | 38994278 | 38994749 | 472 SAT1_CF  | blue | na |
| chrUn | 38994769 | 38995452 | 684 SAT1_CF  | blue | na |
| chrUn | 38995464 | 38996632 | 1169 SAT1_CF | blue | na |
| chrUn | 38996647 | 38996804 | 158 SAT1_CF  | blue | na |
| chrUn | 38996849 | 38997351 | 503 SAT1_CF  | blue | na |
| chrUn | 38997364 | 38997533 | 170 SAT1_CF  | blue | na |
| chrUn | 38997560 | 38998746 | 1187 SAT1_CF | blue | na |
| chrUn | 38998826 | 38999035 | 210 SAT1_CF  | blue | na |
| chrUn | 38999049 | 39001316 | 2268 SAT1_CF | blue | na |
| chrUn | 39001359 | 39001883 | 525 SAT1_CF  | blue | na |
| chrUn | 39001962 | 39002921 | 960 SAT1_CF  | blue | na |
| chrUn | 39002961 | 39003455 | 495 SAT1_CF  | blue | na |
| chrUn | 39003475 | 39004156 | 682 SAT1_CF  | blue | na |

|       |          |          |              |      |    |
|-------|----------|----------|--------------|------|----|
| chrUn | 39004168 | 39005029 | 862 SAT1_CF  | blue | na |
| chrUn | 39005071 | 39005852 | 782 SAT1_CF  | blue | na |
| chrUn | 39005931 | 39006479 | 549 SAT1_CF  | blue | na |
| chrUn | 39006512 | 39006891 | 380 SAT1_CF  | blue | na |
| chrUn | 39006931 | 39008126 | 1196 SAT1_CF | blue | na |
| chrUn | 39008138 | 39008537 | 400 SAT1_CF  | blue | na |
| chrUn | 39008564 | 39009137 | 574 SAT1_CF  | blue | na |
| chrUn | 39009169 | 39009690 | 522 SAT1_CF  | blue | na |
| chrUn | 39009705 | 39010408 | 704 SAT1_CF  | blue | na |
| chrUn | 39010421 | 39010527 | 107 SAT1_CF  | blue | na |
| chrUn | 39010550 | 39012432 | 1883 SAT1_CF | blue | na |
| chrUn | 39012476 | 39012740 | 265 SAT1_CF  | blue | na |
| chrUn | 39012806 | 39013331 | 526 SAT1_CF  | blue | na |
| chrUn | 39013346 | 39013503 | 158 SAT1_CF  | blue | na |
| chrUn | 39013548 | 39014049 | 502 SAT1_CF  | blue | na |
| chrUn | 39014077 | 39014744 | 668 SAT1_CF  | blue | na |
| chrUn | 39014756 | 39015615 | 860 SAT1_CF  | blue | na |
| chrUn | 39015692 | 39016349 | 658 SAT1_CF  | blue | na |
| chrUn | 39016363 | 39016908 | 546 SAT1_CF  | blue | na |
| chrUn | 39016951 | 39017579 | 629 SAT1_CF  | blue | na |
| chrUn | 39017591 | 39018921 | 1331 SAT1_CF | blue | na |
| chrUn | 39019002 | 39019565 | 564 SAT1_CF  | blue | na |
| chrUn | 39019645 | 39020333 | 689 SAT1_CF  | blue | na |
| chrUn | 39024307 | 39025070 | 764 SAT1_CF  | blue | na |
| chrUn | 39025228 | 39026579 | 1352 SAT1_CF | blue | na |
| chrUn | 39026596 | 39027116 | 521 SAT1_CF  | blue | na |
| chrUn | 39027129 | 39027810 | 682 SAT1_CF  | blue | na |
| chrUn | 39027834 | 39027931 | 98 SAT1_CF   | blue | na |
| chrUn | 39027952 | 39028683 | 732 SAT1_CF  | blue | na |
| chrUn | 39028725 | 39030528 | 1804 SAT1_CF | blue | na |
| chrUn | 39030619 | 39031115 | 497 SAT1_CF  | blue | na |
| chrUn | 39031128 | 39032078 | 951 SAT1_CF  | blue | na |
| chrUn | 39032145 | 39032707 | 563 SAT1_CF  | blue | na |
| chrUn | 39032787 | 39033263 | 477 SAT1_CF  | blue | na |
| chrUn | 39033275 | 39034654 | 1380 SAT1_CF | blue | na |
| chrUn | 39034666 | 39035287 | 622 SAT1_CF  | blue | na |
| chrUn | 39035366 | 39036868 | 1503 SAT1_CF | blue | na |
| chrUn | 39036880 | 39038256 | 1377 SAT1_CF | blue | na |
| chrUn | 39038268 | 39038889 | 622 SAT1_CF  | blue | na |
| chrUn | 39038968 | 39040470 | 1503 SAT1_CF | blue | na |
| chrUn | 39040482 | 39041166 | 685 SAT1_CF  | blue | na |
| chrUn | 39041178 | 39041852 | 675 SAT1_CF  | blue | na |

|       |          |          |              |      |    |
|-------|----------|----------|--------------|------|----|
| chrUn | 39041895 | 39043478 | 1584 SAT1_CF | blue | na |
| chrUn | 39043492 | 39043893 | 402 SAT1_CF  | blue | na |
| chrUn | 39043915 | 39045072 | 1158 SAT1_CF | blue | na |
| chrUn | 39045058 | 39045782 | 725 CarSat1  | red  | na |
| chrUn | 39045814 | 39046240 | 427 CarSat1  | red  | na |
| chrUn | 39047578 | 39049270 | 1693 SAT1_CF | blue | na |
| chrUn | 39049282 | 39050519 | 1238 SAT1_CF | blue | na |
| chrUn | 39050562 | 39051994 | 1433 SAT1_CF | blue | na |
| chrUn | 39052028 | 39052502 | 475 SAT1_CF  | blue | na |
| chrUn | 39052562 | 39053520 | 959 SAT1_CF  | blue | na |
| chrUn | 39053564 | 39053901 | 338 SAT1_CF  | blue | na |
| chrUn | 39053949 | 39055967 | 2019 SAT1_CF | blue | na |
| chrUn | 39055993 | 39056513 | 521 SAT1_CF  | blue | na |
| chrUn | 39056560 | 39056697 | 138 SAT1_CF  | blue | na |
| chrUn | 39056725 | 39057274 | 550 SAT1_CF  | blue | na |
| chrUn | 39057354 | 39057915 | 562 SAT1_CF  | blue | na |
| chrUn | 39057959 | 39058426 | 468 SAT1_CF  | blue | na |
| chrUn | 39058439 | 39058982 | 544 SAT1_CF  | blue | na |
| chrUn | 39059009 | 39059203 | 195 SAT1_CF  | blue | na |
| chrUn | 39059246 | 39059809 | 564 SAT1_CF  | blue | na |
| chrUn | 39059853 | 39061750 | 1898 SAT1_CF | blue | na |
| chrUn | 39061772 | 39062338 | 567 SAT1_CF  | blue | na |
| chrUn | 39062370 | 39062946 | 577 SAT1_CF  | blue | na |
| chrUn | 39062957 | 39063621 | 665 SAT1_CF  | blue | na |
| chrUn | 39063643 | 39064145 | 503 SAT1_CF  | blue | na |
| chrUn | 39064211 | 39064347 | 137 SAT1_CF  | blue | na |
| chrUn | 39064375 | 39064886 | 512 SAT1_CF  | blue | na |
| chrUn | 39064929 | 39066004 | 1076 SAT1_CF | blue | na |
| chrUn | 39066047 | 39067664 | 1618 SAT1_CF | blue | na |
| chrUn | 39067691 | 39068192 | 502 SAT1_CF  | blue | na |
| chrUn | 39068232 | 39070087 | 1856 SAT1_CF | blue | na |
| chrUn | 39070137 | 39070985 | 849 SAT1_CF  | blue | na |
| chrUn | 39070997 | 39072928 | 1932 SAT1_CF | blue | na |
| chrUn | 39072940 | 39073542 | 603 SAT1_CF  | blue | na |
| chrUn | 39073553 | 39074233 | 681 SAT1_CF  | blue | na |
| chrUn | 39074245 | 39074927 | 683 SAT1_CF  | blue | na |
| chrUn | 39074947 | 39075481 | 535 SAT1_CF  | blue | na |
| chrUn | 39075492 | 39076253 | 762 SAT1_CF  | blue | na |
| chrUn | 39076264 | 39076817 | 554 SAT1_CF  | blue | na |
| chrUn | 39076843 | 39076946 | 104 SAT1_CF  | blue | na |
| chrUn | 39076969 | 39077439 | 471 SAT1_CF  | blue | na |
| chrUn | 39077513 | 39077684 | 172 SAT1_CF  | blue | na |



|       |          |          |              |      |    |
|-------|----------|----------|--------------|------|----|
| chrUn | 39077861 | 39078653 | 793 SAT1_CF  | blue | na |
| chrUn | 39078697 | 39079022 | 326 SAT1_CF  | blue | na |
| chrUn | 39079046 | 39080645 | 1600 SAT1_CF | blue | na |
| chrUn | 39080658 | 39081205 | 548 SAT1_CF  | blue | na |
| chrUn | 39081284 | 39082241 | 958 SAT1_CF  | blue | na |
| chrUn | 39082287 | 39083377 | 1091 SAT1_CF | blue | na |
| chrUn | 39084306 | 39084624 | 319 SAT1_CF  | blue | na |
| chrUn | 39084636 | 39085313 | 678 SAT1_CF  | blue | na |
| chrUn | 39085338 | 39085832 | 495 SAT1_CF  | blue | na |
| chrUn | 39085870 | 39086436 | 567 SAT1_CF  | blue | na |
| chrUn | 39087727 | 39088280 | 554 SAT1_CF  | blue | na |
| chrUn | 39088292 | 39089344 | 1053 SAT1_CF | blue | na |
| chrUn | 39089388 | 39090717 | 1330 SAT1_CF | blue | na |
| chrUn | 39090729 | 39091334 | 606 SAT1_CF  | blue | na |
| chrUn | 39091354 | 39091848 | 495 SAT1_CF  | blue | na |
| chrUn | 39091888 | 39092461 | 574 SAT1_CF  | blue | na |
| chrUn | 39093888 | 39094253 | 366 SAT1_CF  | blue | na |
| chrUn | 39094296 | 39095411 | 1116 SAT1_CF | blue | na |
| chrUn | 39095429 | 39095949 | 521 SAT1_CF  | blue | na |
| chrUn | 39095975 | 39096083 | 109 SAT1_CF  | blue | na |
| chrUn | 39096094 | 39097767 | 1674 SAT1_CF | blue | na |
| chrUn | 39097791 | 39100498 | 2708 SAT1_CF | blue | na |
| chrUn | 39100521 | 39101140 | 620 SAT1_CF  | blue | na |
| chrUn | 39101180 | 39102210 | 1031 SAT1_CF | blue | na |
| chrUn | 39102256 | 39102875 | 620 SAT1_CF  | blue | na |
| chrUn | 39102890 | 39104131 | 1242 SAT1_CF | blue | na |
| chrUn | 39104144 | 39105520 | 1377 SAT1_CF | blue | na |
| chrUn | 39105532 | 39106611 | 1080 SAT1_CF | blue | na |
| chrUn | 39106655 | 39107199 | 545 SAT1_CF  | blue | na |
| chrUn | 39107212 | 39108903 | 1692 SAT1_CF | blue | na |
| chrUn | 39108916 | 39109416 | 501 SAT1_CF  | blue | na |
| chrUn | 39109452 | 39112142 | 2691 SAT1_CF | blue | na |
| chrUn | 39112154 | 39112708 | 555 SAT1_CF  | blue | na |
| chrUn | 39112763 | 39113394 | 632 SAT1_CF  | blue | na |
| chrUn | 39113407 | 39114875 | 1469 SAT1_CF | blue | na |
| chrUn | 39205013 | 39206583 | 1571 CarSat1 | red  | na |
| chrUn | 39206598 | 39207303 | 706 CarSat1  | red  | na |
| chrUn | 39207333 | 39211218 | 3886 CarSat1 | red  | na |
| chrUn | 39211243 | 39213019 | 1777 CarSat1 | red  | na |
| chrUn | 39216038 | 39217615 | 1578 CarSat1 | red  | na |
| chrUn | 39217630 | 39218577 | 948 CarSat1  | red  | na |
| chrUn | 39218601 | 39223258 | 4658 CarSat1 | red  | na |

|       |          |          |      |         |     |    |
|-------|----------|----------|------|---------|-----|----|
| chrUn | 39223269 | 39224475 | 1207 | CarSat1 | red | na |
| chrUn | 39224499 | 39225463 | 965  | CarSat1 | red | na |
| chrUn | 39225502 | 39226467 | 966  | CarSat1 | red | na |
| chrUn | 39226482 | 39227388 | 907  | CarSat1 | red | na |
| chrUn | 39227442 | 39229965 | 2524 | CarSat1 | red | na |
| chrUn | 39229976 | 39231184 | 1209 | CarSat1 | red | na |
| chrUn | 39231208 | 39232658 | 1451 | CarSat1 | red | na |
| chrUn | 39232682 | 39233851 | 1170 | CarSat1 | red | na |
| chrUn | 39257385 | 39257982 | 598  | CarSat1 | red | na |
| chrUn | 39258006 | 39259606 | 1601 | CarSat1 | red | na |
| chrUn | 39259914 | 39260676 | 763  | CarSat1 | red | na |
| chrUn | 39261329 | 39261915 | 587  | CarSat1 | red | na |
| chrUn | 39261942 | 39263395 | 1454 | CarSat1 | red | na |
| chrUn | 39263422 | 39264635 | 1214 | CarSat1 | red | na |
| chrUn | 39264659 | 39265626 | 968  | CarSat1 | red | na |
| chrUn | 39265647 | 39267372 | 1726 | CarSat1 | red | na |
| chrUn | 39267387 | 39269872 | 2486 | CarSat1 | red | na |
| chrUn | 39270803 | 39271792 | 990  | CarSat1 | red | na |
| chrUn | 39271807 | 39274944 | 3138 | CarSat1 | red | na |
| chrUn | 39275602 | 39276193 | 592  | CarSat1 | red | na |
| chrUn | 39276223 | 39276929 | 707  | CarSat1 | red | na |
| chrUn | 39276959 | 39278402 | 1444 | CarSat1 | red | na |
| chrUn | 39278432 | 39280110 | 1679 | CarSat1 | red | na |
| chrUn | 39280134 | 39280839 | 706  | CarSat1 | red | na |
| chrUn | 39280872 | 39288957 | 8086 | CarSat1 | red | na |
| chrUn | 39288981 | 39291917 | 2937 | CarSat1 | red | na |
| chrUn | 39291941 | 39292895 | 955  | CarSat1 | red | na |
| chrUn | 39292922 | 39293632 | 711  | CarSat1 | red | na |
| chrUn | 39293659 | 39294368 | 710  | CarSat1 | red | na |
| chrUn | 39294395 | 39294864 | 470  | CarSat1 | red | na |
| chrUn | 39294880 | 39295842 | 963  | CarSat1 | red | na |
| chrUn | 39295869 | 39296579 | 711  | CarSat1 | red | na |
| chrUn | 39296606 | 39297446 | 841  | CarSat1 | red | na |
| chrUn | 39369772 | 39373236 | 3465 | CarSat1 | red | na |
| chrUn | 39373269 | 39373770 | 502  | CarSat1 | red | na |
| chrUn | 39373785 | 39374507 | 723  | CarSat1 | red | na |
| chrUn | 39374522 | 39376721 | 2200 | CarSat1 | red | na |
| chrUn | 39376736 | 39377680 | 945  | CarSat1 | red | na |
| chrUn | 39378838 | 39380655 | 1818 | CarSat1 | red | na |
| chrUn | 39380667 | 39381891 | 1225 | CarSat1 | red | na |
| chrUn | 39381922 | 39383364 | 1443 | CarSat1 | red | na |
| chrUn | 39383394 | 39385575 | 2182 | CarSat1 | red | na |

|       |          |          |      |         |      |    |
|-------|----------|----------|------|---------|------|----|
| chrUn | 39385612 | 39388543 | 2932 | CarSat1 | red  | na |
| chrUn | 39388557 | 39389284 | 728  | CarSat1 | red  | na |
| chrUn | 39389299 | 39390482 | 1184 | CarSat1 | red  | na |
| chrUn | 39390503 | 39391497 | 995  | CarSat1 | red  | na |
| chrUn | 39391512 | 39391956 | 445  | CarSat1 | red  | na |
| chrUn | 39391977 | 39398015 | 6039 | CarSat1 | red  | na |
| chrUn | 39398035 | 39398332 | 298  | SAT1_CF | blue | na |
| chrUn | 39399010 | 39399939 | 930  | SAT1_CF | blue | na |
| chrUn | 39399951 | 39400617 | 667  | SAT1_CF | blue | na |
| chrUn | 39400659 | 39402622 | 1964 | SAT1_CF | blue | na |
| chrUn | 39402643 | 39403163 | 521  | SAT1_CF | blue | na |
| chrUn | 39403181 | 39403860 | 680  | SAT1_CF | blue | na |
| chrUn | 39403872 | 39404550 | 679  | SAT1_CF | blue | na |
| chrUn | 39404592 | 39406469 | 1878 | SAT1_CF | blue | na |
| chrUn | 39406497 | 39406655 | 159  | SAT1_CF | blue | na |
| chrUn | 39406699 | 39407193 | 495  | SAT1_CF | blue | na |
| chrUn | 39407215 | 39409191 | 1977 | SAT1_CF | blue | na |
| chrUn | 39409204 | 39410575 | 1372 | SAT1_CF | blue | na |
| chrUn | 39410617 | 39412675 | 2059 | SAT1_CF | blue | na |
| chrUn | 39412699 | 39413218 | 520  | SAT1_CF | blue | na |
| chrUn | 39413231 | 39413833 | 603  | SAT1_CF | blue | na |
| chrUn | 39413845 | 39416632 | 2788 | SAT1_CF | blue | na |
| chrUn | 39416651 | 39418151 | 1501 | SAT1_CF | blue | na |
| chrUn | 39418194 | 39418911 | 718  | SAT1_CF | blue | na |
| chrUn | 39418955 | 39419506 | 552  | SAT1_CF | blue | na |
| chrUn | 39419519 | 39420196 | 678  | SAT1_CF | blue | na |
| chrUn | 39420238 | 39421055 | 818  | SAT1_CF | blue | na |
| chrUn | 39421237 | 39421328 | 92   | SAT1_CF | blue | na |
| chrUn | 39421342 | 39423377 | 2036 | SAT1_CF | blue | na |
| chrUn | 39423389 | 39424061 | 673  | SAT1_CF | blue | na |
| chrUn | 39424131 | 39424606 | 476  | SAT1_CF | blue | na |
| chrUn | 39424618 | 39425295 | 678  | SAT1_CF | blue | na |
| chrUn | 39425338 | 39425881 | 544  | SAT1_CF | blue | na |
| chrUn | 39425925 | 39426387 | 463  | SAT1_CF | blue | na |
| chrUn | 39426879 | 39427633 | 755  | SAT1_CF | blue | na |
| chrUn | 39427823 | 39428203 | 381  | SAT1_CF | blue | na |
| chrUn | 39428219 | 39429000 | 782  | SAT1_CF | blue | na |
| chrUn | 39429068 | 39429549 | 482  | SAT1_CF | blue | na |
| chrUn | 39429561 | 39429674 | 114  | SAT1_CF | blue | na |
| chrUn | 39429691 | 39430401 | 711  | SAT1_CF | blue | na |
| chrUn | 39430413 | 39431089 | 677  | SAT1_CF | blue | na |
| chrUn | 39431133 | 39432096 | 964  | SAT1_CF | blue | na |

|       |          |          |              |      |    |
|-------|----------|----------|--------------|------|----|
| chrUn | 39432175 | 39432721 | 547 SAT1_CF  | blue | na |
| chrUn | 39432734 | 39433134 | 401 SAT1_CF  | blue | na |
| chrUn | 39433174 | 39433308 | 135 SAT1_CF  | blue | na |
| chrUn | 39433493 | 39433892 | 400 SAT1_CF  | blue | na |
| chrUn | 39433910 | 39434408 | 499 SAT1_CF  | blue | na |
| chrUn | 39438056 | 39438483 | 428 SAT1_CF  | blue | na |
| chrUn | 39438530 | 39439245 | 716 SAT1_CF  | blue | na |
| chrUn | 39439324 | 39440106 | 783 SAT1_CF  | blue | na |
| chrUn | 39440148 | 39440319 | 172 SAT1_CF  | blue | na |
| chrUn | 39440332 | 39440879 | 548 SAT1_CF  | blue | na |
| chrUn | 39440908 | 39441008 | 101 SAT1_CF  | blue | na |
| chrUn | 39441022 | 39441628 | 607 SAT1_CF  | blue | na |
| chrUn | 39441640 | 39442326 | 687 SAT1_CF  | blue | na |
| chrUn | 39442337 | 39442838 | 502 SAT1_CF  | blue | na |
| chrUn | 39442881 | 39445454 | 2574 SAT1_CF | blue | na |
| chrUn | 39445467 | 39445988 | 522 SAT1_CF  | blue | na |
| chrUn | 39446035 | 39446171 | 137 SAT1_CF  | blue | na |
| chrUn | 39446199 | 39448439 | 2241 SAT1_CF | blue | na |
| chrUn | 39448451 | 39449004 | 554 SAT1_CF  | blue | na |
| chrUn | 39449069 | 39449138 | 70 SAT1_CF   | blue | na |
| chrUn | 39449153 | 39449667 | 515 SAT1_CF  | blue | na |
| chrUn | 39449693 | 39450708 | 1016 SAT1_CF | blue | na |
| chrUn | 39450763 | 39451382 | 620 SAT1_CF  | blue | na |
| chrUn | 39451394 | 39452078 | 685 SAT1_CF  | blue | na |
| chrUn | 39452091 | 39452573 | 483 SAT1_CF  | blue | na |
| chrUn | 39452649 | 39453149 | 501 SAT1_CF  | blue | na |
| chrUn | 39453166 | 39454079 | 914 SAT1_CF  | blue | na |
| chrUn | 39496181 | 39496901 | 721 SAT1_CF  | blue | na |
| chrUn | 39496944 | 39500700 | 3757 SAT1_CF | blue | na |
| chrUn | 39500744 | 39501274 | 531 SAT1_CF  | blue | na |
| chrUn | 39501316 | 39502274 | 959 SAT1_CF  | blue | na |
| chrUn | 39502296 | 39503453 | 1158 SAT1_CF | blue | na |
| chrUn | 39503439 | 39504157 | 719 CarSat1  | red  | na |
| chrUn | 39504315 | 39504543 | 229 CarSat1  | red  | na |
| chrUn | 39505548 | 39506369 | 822 SAT1_CF  | blue | na |
| chrUn | 39506412 | 39508475 | 2064 SAT1_CF | blue | na |
| chrUn | 39508487 | 39509850 | 1364 SAT1_CF | blue | na |
| chrUn | 39509894 | 39510450 | 557 SAT1_CF  | blue | na |
| chrUn | 39510530 | 39511114 | 585 SAT1_CF  | blue | na |
| chrUn | 39511126 | 39512139 | 1014 SAT1_CF | blue | na |
| chrUn | 39512404 | 39513054 | 651 SAT1_CF  | blue | na |
| chrUn | 39513079 | 39513402 | 324 SAT1_CF  | blue | na |

|       |          |          |              |      |    |
|-------|----------|----------|--------------|------|----|
| chrUn | 39513512 | 39514054 | 543 SAT1_CF  | blue | na |
| chrUn | 39514075 | 39514470 | 396 SAT1_CF  | blue | na |
| chrUn | 39514510 | 39515997 | 1488 SAT1_CF | blue | na |
| chrUn | 39516018 | 39516560 | 543 SAT1_CF  | blue | na |
| chrUn | 39516630 | 39517832 | 1203 SAT1_CF | blue | na |
| chrUn | 39517876 | 39518182 | 307 SAT1_CF  | blue | na |
| chrUn | 39518263 | 39519115 | 853 SAT1_CF  | blue | na |
| chrUn | 39519145 | 39520103 | 959 SAT1_CF  | blue | na |
| chrUn | 39520153 | 39520852 | 700 SAT1_CF  | blue | na |
| chrUn | 39520903 | 39521963 | 1061 SAT1_CF | blue | na |
| chrUn | 39522033 | 39522458 | 426 SAT1_CF  | blue | na |
| chrUn | 39522500 | 39524357 | 1858 SAT1_CF | blue | na |
| chrUn | 39524395 | 39524895 | 501 SAT1_CF  | blue | na |
| chrUn | 39524922 | 39526131 | 1210 SAT1_CF | blue | na |
| chrUn | 39526143 | 39526787 | 645 SAT1_CF  | blue | na |
| chrUn | 39526812 | 39527644 | 833 SAT1_CF  | blue | na |
| chrUn | 39527709 | 39528158 | 450 SAT1_CF  | blue | na |
| chrUn | 39528245 | 39528746 | 502 SAT1_CF  | blue | na |
| chrUn | 39528774 | 39530908 | 2135 SAT1_CF | blue | na |
| chrUn | 39530966 | 39531598 | 633 SAT1_CF  | blue | na |
| chrUn | 39531610 | 39532506 | 897 SAT1_CF  | blue | na |
| chrUn | 39532566 | 39533493 | 928 SAT1_CF  | blue | na |
| chrUn | 39533510 | 39534496 | 987 SAT1_CF  | blue | na |
| chrUn | 39534508 | 39535185 | 678 SAT1_CF  | blue | na |
| chrUn | 39535228 | 39536190 | 963 SAT1_CF  | blue | na |
| chrUn | 39536257 | 39536843 | 587 SAT1_CF  | blue | na |
| chrUn | 39536857 | 39537401 | 545 SAT1_CF  | blue | na |
| chrUn | 39537413 | 39538059 | 647 SAT1_CF  | blue | na |
| chrUn | 39538139 | 39539437 | 1299 SAT1_CF | blue | na |
| chrUn | 39539524 | 39540025 | 502 SAT1_CF  | blue | na |
| chrUn | 39540037 | 39540146 | 110 SAT1_CF  | blue | na |
| chrUn | 39540167 | 39540799 | 633 SAT1_CF  | blue | na |
| chrUn | 39540812 | 39541495 | 684 SAT1_CF  | blue | na |
| chrUn | 39541507 | 39542189 | 683 SAT1_CF  | blue | na |
| chrUn | 39542200 | 39542692 | 493 SAT1_CF  | blue | na |
| chrUn | 39542706 | 39543430 | 725 SAT1_CF  | blue | na |
| chrUn | 39543442 | 39543512 | 71 SAT1_CF   | blue | na |
| chrUn | 39543537 | 39543684 | 148 SAT1_CF  | blue | na |
| chrUn | 39543711 | 39544911 | 1201 SAT1_CF | blue | na |
| chrUn | 39544963 | 39545099 | 137 SAT1_CF  | blue | na |
| chrUn | 39545165 | 39545752 | 588 SAT1_CF  | blue | na |
| chrUn | 39545808 | 39546322 | 515 SAT1_CF  | blue | na |

|       |          |          |              |      |    |
|-------|----------|----------|--------------|------|----|
| chrUn | 39546335 | 39547424 | 1090 SAT1_CF | blue | na |
| chrUn | 39547450 | 39548937 | 1488 SAT1_CF | blue | na |
| chrUn | 39548949 | 39549567 | 619 SAT1_CF  | blue | na |
| chrUn | 39549646 | 39550889 | 1244 SAT1_CF | blue | na |
| chrUn | 39717304 | 39718733 | 1430 SAT1_CF | blue | na |
| chrUn | 39720066 | 39720639 | 574 SAT1_CF  | blue | na |
| chrUn | 39720674 | 39721181 | 508 SAT1_CF  | blue | na |
| chrUn | 39721194 | 39721869 | 676 SAT1_CF  | blue | na |
| chrUn | 39721912 | 39722877 | 966 SAT1_CF  | blue | na |
| chrUn | 39722920 | 39723954 | 1035 SAT1_CF | blue | na |
| chrUn | 39723974 | 39725179 | 1206 SAT1_CF | blue | na |
| chrUn | 39725208 | 39725729 | 522 SAT1_CF  | blue | na |
| chrUn | 39725742 | 39726612 | 871 SAT1_CF  | blue | na |
| chrUn | 39726634 | 39727178 | 545 SAT1_CF  | blue | na |
| chrUn | 39727220 | 39727759 | 540 SAT1_CF  | blue | na |
| chrUn | 39727793 | 39729075 | 1283 SAT1_CF | blue | na |
| chrUn | 39729087 | 39729978 | 892 SAT1_CF  | blue | na |
| chrUn | 39729991 | 39731282 | 1292 SAT1_CF | blue | na |
| chrUn | 39731324 | 39732284 | 961 SAT1_CF  | blue | na |
| chrUn | 39732325 | 39733159 | 835 SAT1_CF  | blue | na |
| chrUn | 39823387 | 39823968 | 582 Sat7CF   | lime | na |
| chrUn | 39862266 | 39862741 | 476 SAT1_CF  | blue | na |
| chrUn | 39862807 | 39862943 | 137 SAT1_CF  | blue | na |
| chrUn | 39862971 | 39863531 | 561 SAT1_CF  | blue | na |
| chrUn | 39863562 | 39864111 | 550 SAT1_CF  | blue | na |
| chrUn | 39864198 | 39864550 | 353 SAT1_CF  | blue | na |
| chrUn | 39864563 | 39865920 | 1358 SAT1_CF | blue | na |
| chrUn | 39865932 | 39866621 | 690 SAT1_CF  | blue | na |
| chrUn | 39866633 | 39868010 | 1378 SAT1_CF | blue | na |
| chrUn | 39868022 | 39869091 | 1070 SAT1_CF | blue | na |
| chrUn | 39869103 | 39869946 | 844 SAT1_CF  | blue | na |
| chrUn | 39870831 | 39871821 | 991 SAT1_CF  | blue | na |
| chrUn | 39871848 | 39872480 | 633 SAT1_CF  | blue | na |
| chrUn | 39872523 | 39873197 | 675 SAT1_CF  | blue | na |
| chrUn | 39873210 | 39873765 | 556 SAT1_CF  | blue | na |
| chrUn | 39873788 | 39873893 | 106 SAT1_CF  | blue | na |
| chrUn | 39873906 | 39874423 | 518 SAT1_CF  | blue | na |
| chrUn | 39874442 | 39876479 | 2038 SAT1_CF | blue | na |
| chrUn | 39876522 | 39877198 | 677 SAT1_CF  | blue | na |
| chrUn | 39877210 | 39877978 | 769 SAT1_CF  | blue | na |
| chrUn | 39877999 | 39878473 | 475 SAT1_CF  | blue | na |
| chrUn | 39878533 | 39878934 | 402 SAT1_CF  | blue | na |

|       |          |          |      |         |      |    |
|-------|----------|----------|------|---------|------|----|
| chrUn | 39878983 | 39880175 | 1193 | SAT1_CF | blue | na |
| chrUn | 39880202 | 39881358 | 1157 | SAT1_CF | blue | na |
| chrUn | 39881378 | 39881487 | 110  | SAT1_CF | blue | na |
| chrUn | 39881499 | 39884463 | 2965 | SAT1_CF | blue | na |
| chrUn | 39884474 | 39884986 | 513  | SAT1_CF | blue | na |
| chrUn | 39885007 | 39885580 | 574  | SAT1_CF | blue | na |
| chrUn | 39885604 | 39886299 | 696  | SAT1_CF | blue | na |
| chrUn | 39886316 | 39887154 | 839  | SAT1_CF | blue | na |
| chrUn | 39887189 | 39887669 | 481  | SAT1_CF | blue | na |
| chrUn | 39887695 | 39888145 | 451  | SAT1_CF | blue | na |
| chrUn | 39888162 | 39888761 | 600  | SAT1_CF | blue | na |
| chrUn | 39888779 | 39889260 | 482  | SAT1_CF | blue | na |
| chrUn | 39889332 | 39889843 | 512  | SAT1_CF | blue | na |
| chrUn | 39889876 | 39890422 | 547  | SAT1_CF | blue | na |
| chrUn | 39890483 | 39890580 | 98   | SAT1_CF | blue | na |
| chrUn | 39890592 | 39891134 | 543  | SAT1_CF | blue | na |
| chrUn | 39891176 | 39891886 | 711  | SAT1_CF | blue | na |
| chrUn | 39891916 | 39892262 | 347  | SAT1_CF | blue | na |
| chrUn | 39892277 | 39892819 | 543  | SAT1_CF | blue | na |
| chrUn | 39892860 | 39893719 | 860  | SAT1_CF | blue | na |
| chrUn | 39893734 | 39894442 | 709  | SAT1_CF | blue | na |
| chrUn | 39894463 | 39894572 | 110  | SAT1_CF | blue | na |
| chrUn | 39894584 | 39895105 | 522  | SAT1_CF | blue | na |
| chrUn | 39895129 | 39895286 | 158  | SAT1_CF | blue | na |
| chrUn | 39895314 | 39896318 | 1005 | SAT1_CF | blue | na |
| chrUn | 39896342 | 39896892 | 551  | SAT1_CF | blue | na |
| chrUn | 39896904 | 39897450 | 547  | SAT1_CF | blue | na |
| chrUn | 39897477 | 39898002 | 526  | SAT1_CF | blue | na |
| chrUn | 39898082 | 39899122 | 1041 | SAT1_CF | blue | na |
| chrUn | 39899136 | 39899543 | 408  | SAT1_CF | blue | na |
| chrUn | 39899584 | 39900444 | 861  | SAT1_CF | blue | na |
| chrUn | 39900458 | 39901139 | 682  | SAT1_CF | blue | na |
| chrUn | 39901151 | 39901834 | 684  | SAT1_CF | blue | na |
| chrUn | 39901847 | 39902550 | 704  | SAT1_CF | blue | na |
| chrUn | 39902565 | 39903543 | 979  | SAT1_CF | blue | na |
| chrUn | 39903579 | 39904428 | 850  | SAT1_CF | blue | na |
| chrUn | 39904471 | 39905708 | 1238 | SAT1_CF | blue | na |
| chrUn | 39905755 | 39907342 | 1588 | SAT1_CF | blue | na |
| chrUn | 39907385 | 39908059 | 675  | SAT1_CF | blue | na |
| chrUn | 39908071 | 39908830 | 760  | SAT1_CF | blue | na |
| chrUn | 39908843 | 39909396 | 554  | SAT1_CF | blue | na |
| chrUn | 39909419 | 39909525 | 107  | SAT1_CF | blue | na |

|       |          |          |              |        |    |
|-------|----------|----------|--------------|--------|----|
| chrUn | 39909538 | 39910038 | 501 SAT1_CF  | blue   | na |
| chrUn | 39910125 | 39911180 | 1056 SAT1_CF | blue   | na |
| chrUn | 39911191 | 39911693 | 503 SAT1_CF  | blue   | na |
| chrUn | 39911759 | 39911895 | 137 SAT1_CF  | blue   | na |
| chrUn | 39911910 | 39912433 | 524 SAT1_CF  | blue   | na |
| chrUn | 39912513 | 39914958 | 2446 SAT1_CF | blue   | na |
| chrUn | 39915001 | 39915550 | 550 SAT1_CF  | blue   | na |
| chrUn | 39915564 | 39917095 | 1532 SAT1_CF | blue   | na |
| chrUn | 39917116 | 39917224 | 109 SAT1_CF  | blue   | na |
| chrUn | 39917237 | 39917719 | 483 SAT1_CF  | blue   | na |
| chrUn | 39917778 | 39918785 | 1008 SAT1_CF | blue   | na |
| chrUn | 39918817 | 39919817 | 1001 SAT1_CF | blue   | na |
| chrUn | 39919860 | 39920537 | 678 SAT1_CF  | blue   | na |
| chrUn | 39920549 | 39921050 | 502 SAT1_CF  | blue   | na |
| chrUn | 39921095 | 39921252 | 158 SAT1_CF  | blue   | na |
| chrUn | 39921285 | 39921790 | 506 SAT1_CF  | blue   | na |
| chrUn | 39921821 | 39923689 | 1869 SAT1_CF | blue   | na |
| chrUn | 39923732 | 39924406 | 675 SAT1_CF  | blue   | na |
| chrUn | 39924419 | 39924680 | 262 SAT1_CF  | blue   | na |
| chrUn | 39939138 | 39940148 | 1011 Sat2CF  | purple | na |
| chrUn | 39940027 | 39940208 | 182 Sat2CF   | purple | na |
| chrUn | 40144493 | 40144602 | 110 Sat16CF  | na     | na |
| chrUn | 40155724 | 40156773 | 1050 Sat9CF  | na     | na |
| chrUn | 40206710 | 40206976 | 267 SAT1_CF  | blue   | na |
| chrUn | 40207018 | 40208874 | 1857 SAT1_CF | blue   | na |
| chrUn | 40208914 | 40209417 | 504 SAT1_CF  | blue   | na |
| chrUn | 40209530 | 40211872 | 2343 SAT1_CF | blue   | na |
| chrUn | 40211992 | 40212518 | 527 SAT1_CF  | blue   | na |
| chrUn | 40212597 | 40213119 | 523 SAT1_CF  | blue   | na |
| chrUn | 40213134 | 40214599 | 1466 SAT1_CF | blue   | na |
| chrUn | 40214642 | 40215274 | 633 SAT1_CF  | blue   | na |
| chrUn | 40215302 | 40215826 | 525 SAT1_CF  | blue   | na |
| chrUn | 40216070 | 40216118 | 49 SAT1_CF   | blue   | na |
| chrUn | 40216137 | 40216656 | 520 SAT1_CF  | blue   | na |
| chrUn | 40216670 | 40217352 | 683 SAT1_CF  | blue   | na |
| chrUn | 40217364 | 40219892 | 2529 SAT1_CF | blue   | na |
| chrUn | 40219964 | 40220456 | 493 SAT1_CF  | blue   | na |
| chrUn | 40220652 | 40221599 | 948 SAT1_CF  | blue   | na |
| chrUn | 40221611 | 40222286 | 676 SAT1_CF  | blue   | na |
| chrUn | 40222329 | 40223316 | 988 SAT1_CF  | blue   | na |
| chrUn | 40223373 | 40224328 | 956 SAT1_CF  | blue   | na |
| chrUn | 40224368 | 40224868 | 501 SAT1_CF  | blue   | na |



|       |          |          |              |      |    |
|-------|----------|----------|--------------|------|----|
| chrUn | 40224895 | 40225641 | 747 SAT1_CF  | blue | na |
| chrUn | 40225653 | 40226323 | 671 SAT1_CF  | blue | na |
| chrUn | 40226335 | 40226508 | 174 SAT1_CF  | blue | na |
| chrUn | 40226550 | 40228839 | 2290 SAT1_CF | blue | na |
| chrUn | 40228852 | 40228958 | 107 SAT1_CF  | blue | na |
| chrUn | 40228981 | 40230357 | 1377 SAT1_CF | blue | na |
| chrUn | 40230397 | 40232037 | 1641 SAT1_CF | blue | na |
| chrUn | 40232086 | 40232215 | 130 SAT1_CF  | blue | na |
| chrUn | 40232259 | 40232803 | 545 SAT1_CF  | blue | na |
| chrUn | 40232852 | 40232987 | 136 SAT1_CF  | blue | na |
| chrUn | 40233048 | 40233573 | 526 SAT1_CF  | blue | na |
| chrUn | 40233588 | 40233724 | 137 SAT1_CF  | blue | na |
| chrUn | 40233788 | 40236323 | 2536 SAT1_CF | blue | na |
| chrUn | 40236370 | 40237077 | 708 SAT1_CF  | blue | na |
| chrUn | 40237095 | 40237852 | 758 SAT1_CF  | blue | na |
| chrUn | 40237864 | 40238694 | 831 SAT1_CF  | blue | na |
| chrUn | 40238710 | 40239767 | 1058 SAT1_CF | blue | na |
| chrUn | 40239847 | 40240842 | 996 SAT1_CF  | blue | na |
| chrUn | 40240854 | 40241527 | 674 SAT1_CF  | blue | na |
| chrUn | 40241570 | 40242479 | 910 SAT1_CF  | blue | na |
| chrUn | 40242536 | 40243090 | 555 SAT1_CF  | blue | na |
| chrUn | 40243102 | 40243990 | 889 SAT1_CF  | blue | na |
| chrUn | 40244003 | 40246016 | 2014 SAT1_CF | blue | na |
| chrUn | 40246095 | 40246631 | 537 SAT1_CF  | blue | na |
| chrUn | 40246685 | 40247355 | 671 SAT1_CF  | blue | na |
| chrUn | 40248750 | 40249499 | 750 SAT1_CF  | blue | na |
| chrUn | 40249522 | 40250815 | 1294 SAT1_CF | blue | na |
| chrUn | 40250848 | 40251197 | 350 SAT1_CF  | blue | na |
| chrUn | 40251253 | 40252450 | 1198 SAT1_CF | blue | na |
| chrUn | 40252462 | 40253130 | 669 SAT1_CF  | blue | na |
| chrUn | 40253173 | 40255133 | 1961 SAT1_CF | blue | na |
| chrUn | 40255178 | 40255679 | 502 SAT1_CF  | blue | na |
| chrUn | 40255691 | 40256346 | 656 SAT1_CF  | blue | na |
| chrUn | 40256403 | 40256949 | 547 SAT1_CF  | blue | na |
| chrUn | 40256992 | 40258361 | 1370 SAT1_CF | blue | na |
| chrUn | 40258373 | 40258481 | 109 SAT1_CF  | blue | na |
| chrUn | 40258504 | 40259059 | 556 SAT1_CF  | blue | na |
| chrUn | 40259071 | 40259180 | 110 SAT1_CF  | blue | na |
| chrUn | 40259200 | 40259747 | 548 SAT1_CF  | blue | na |
| chrUn | 40259790 | 40261230 | 1441 SAT1_CF | blue | na |
| chrUn | 40261286 | 40261787 | 502 SAT1_CF  | blue | na |
| chrUn | 40261799 | 40262481 | 683 SAT1_CF  | blue | na |

|       |          |          |              |      |    |
|-------|----------|----------|--------------|------|----|
| chrUn | 40262493 | 40263160 | 668 SAT1_CF  | blue | na |
| chrUn | 40263209 | 40264513 | 1305 SAT1_CF | blue | na |
| chrUn | 40264569 | 40265778 | 1210 SAT1_CF | blue | na |
| chrUn | 40265843 | 40266542 | 700 SAT1_CF  | blue | na |
| chrUn | 40266555 | 40267668 | 1114 SAT1_CF | blue | na |
| chrUn | 40342487 | 40343155 | 669 SAT1_CF  | blue | na |
| chrUn | 40343183 | 40343749 | 567 SAT1_CF  | blue | na |
| chrUn | 40346418 | 40346648 | 231 SAT1_CF  | blue | na |
| chrUn | 40346717 | 40349525 | 2809 SAT1_CF | blue | na |
| chrUn | 40349553 | 40352700 | 3148 SAT1_CF | blue | na |
| chrUn | 40352729 | 40355897 | 3169 SAT1_CF | blue | na |
| chrUn | 40355937 | 40356997 | 1061 SAT1_CF | blue | na |
| chrUn | 40421904 | 40422606 | 703 SAT1_CF  | blue | na |
| chrUn | 40422648 | 40424308 | 1661 SAT1_CF | blue | na |
| chrUn | 40424320 | 40426673 | 2354 SAT1_CF | blue | na |
| chrUn | 40426701 | 40427265 | 565 SAT1_CF  | blue | na |
| chrUn | 40427345 | 40427855 | 511 SAT1_CF  | blue | na |
| chrUn | 40427883 | 40428040 | 158 SAT1_CF  | blue | na |
| chrUn | 40428085 | 40428587 | 503 SAT1_CF  | blue | na |
| chrUn | 40428603 | 40429360 | 758 SAT1_CF  | blue | na |
| chrUn | 40429372 | 40430628 | 1257 SAT1_CF | blue | na |
| chrUn | 40430645 | 40431602 | 958 SAT1_CF  | blue | na |
| chrUn | 40431622 | 40432488 | 867 SAT1_CF  | blue | na |
| chrUn | 40432508 | 40433178 | 671 SAT1_CF  | blue | na |
| chrUn | 40433189 | 40434754 | 1566 SAT1_CF | blue | na |
| chrUn | 40434794 | 40435295 | 502 SAT1_CF  | blue | na |
| chrUn | 40435322 | 40436754 | 1433 SAT1_CF | blue | na |
| chrUn | 40436802 | 40438066 | 1265 SAT1_CF | blue | na |
| chrUn | 40438109 | 40438653 | 545 SAT1_CF  | blue | na |
| chrUn | 40438737 | 40439283 | 547 SAT1_CF  | blue | na |
| chrUn | 40439311 | 40440014 | 704 SAT1_CF  | blue | na |
| chrUn | 40440040 | 40440710 | 671 SAT1_CF  | blue | na |
| chrUn | 40440722 | 40441396 | 675 SAT1_CF  | blue | na |
| chrUn | 40441445 | 40441561 | 117 SAT1_CF  | blue | na |
| chrUn | 40441603 | 40442641 | 1039 SAT1_CF | blue | na |
| chrUn | 40442698 | 40443330 | 633 SAT1_CF  | blue | na |
| chrUn | 40443342 | 40443945 | 604 SAT1_CF  | blue | na |
| chrUn | 40443958 | 40444064 | 107 SAT1_CF  | blue | na |
| chrUn | 40444085 | 40444832 | 748 SAT1_CF  | blue | na |
| chrUn | 40444847 | 40445314 | 468 SAT1_CF  | blue | na |
| chrUn | 40445392 | 40445937 | 546 SAT1_CF  | blue | na |
| chrUn | 40445975 | 40446317 | 343 SAT1_CF  | blue | na |

|       |          |          |              |      |    |
|-------|----------|----------|--------------|------|----|
| chrUn | 40446389 | 40446889 | 501 SAT1_CF  | blue | na |
| chrUn | 40446903 | 40447663 | 761 SAT1_CF  | blue | na |
| chrUn | 40447675 | 40448393 | 719 SAT1_CF  | blue | na |
| chrUn | 40448421 | 40448794 | 374 SAT1_CF  | blue | na |
| chrUn | 40448806 | 40448915 | 110 SAT1_CF  | blue | na |
| chrUn | 40448936 | 40449483 | 548 SAT1_CF  | blue | na |
| chrUn | 40449526 | 40450358 | 833 SAT1_CF  | blue | na |
| chrUn | 40450549 | 40451556 | 1008 SAT1_CF | blue | na |
| chrUn | 40451580 | 40452316 | 737 SAT1_CF  | blue | na |
| chrUn | 40452329 | 40453168 | 840 SAT1_CF  | blue | na |
| chrUn | 40453180 | 40454451 | 1272 SAT1_CF | blue | na |
| chrUn | 40454493 | 40456158 | 1666 SAT1_CF | blue | na |
| chrUn | 40456186 | 40456321 | 136 SAT1_CF  | blue | na |
| chrUn | 40456387 | 40456888 | 502 SAT1_CF  | blue | na |
| chrUn | 40456900 | 40457006 | 107 SAT1_CF  | blue | na |
| chrUn | 40457030 | 40457658 | 629 SAT1_CF  | blue | na |
| chrUn | 40457710 | 40458535 | 826 SAT1_CF  | blue | na |
| chrUn | 40458553 | 40459232 | 680 SAT1_CF  | blue | na |
| chrUn | 40459244 | 40460572 | 1329 SAT1_CF | blue | na |
| chrUn | 40460597 | 40460922 | 326 SAT1_CF  | blue | na |
| chrUn | 40460989 | 40461511 | 523 SAT1_CF  | blue | na |
| chrUn | 40461524 | 40461886 | 363 SAT1_CF  | blue | na |
| chrUn | 40461946 | 40462420 | 475 SAT1_CF  | blue | na |
| chrUn | 40462440 | 40463123 | 684 SAT1_CF  | blue | na |
| chrUn | 40463135 | 40463809 | 675 SAT1_CF  | blue | na |
| chrUn | 40463857 | 40464355 | 499 SAT1_CF  | blue | na |
| chrUn | 40464444 | 40464944 | 501 SAT1_CF  | blue | na |
| chrUn | 40464957 | 40465064 | 108 SAT1_CF  | blue | na |
| chrUn | 40465086 | 40465639 | 554 SAT1_CF  | blue | na |
| chrUn | 40465652 | 40468533 | 2882 SAT1_CF | blue | na |
| chrUn | 40468548 | 40468705 | 158 SAT1_CF  | blue | na |
| chrUn | 40468750 | 40469832 | 1083 SAT1_CF | blue | na |
| chrUn | 40469843 | 40470445 | 603 SAT1_CF  | blue | na |
| chrUn | 40470457 | 40471243 | 787 SAT1_CF  | blue | na |
| chrUn | 40471288 | 40471789 | 502 SAT1_CF  | blue | na |
| chrUn | 40471803 | 40472557 | 755 SAT1_CF  | blue | na |
| chrUn | 40472569 | 40472678 | 110 SAT1_CF  | blue | na |
| chrUn | 40472699 | 40473243 | 545 SAT1_CF  | blue | na |
| chrUn | 40473292 | 40473895 | 604 SAT1_CF  | blue | na |
| chrUn | 40473925 | 40475612 | 1688 SAT1_CF | blue | na |
| chrUn | 40475625 | 40475732 | 108 SAT1_CF  | blue | na |
| chrUn | 40475754 | 40476384 | 631 SAT1_CF  | blue | na |

|       |          |          |              |      |    |
|-------|----------|----------|--------------|------|----|
| chrUn | 40476398 | 40478993 | 2596 SAT1_CF | blue | na |
| chrUn | 40479175 | 40479356 | 182 SAT1_CF  | blue | na |
| chrUn | 40479396 | 40479925 | 530 SAT1_CF  | blue | na |
| chrUn | 40479938 | 40480043 | 106 SAT1_CF  | blue | na |
| chrUn | 40480066 | 40481335 | 1270 SAT1_CF | blue | na |
| chrUn | 40481350 | 40481485 | 136 SAT1_CF  | blue | na |
| chrUn | 40481530 | 40482237 | 708 SAT1_CF  | blue | na |
| chrUn | 40626906 | 40627605 | 700 SAT1_CF  | blue | na |
| chrUn | 40627616 | 40628429 | 814 SAT1_CF  | blue | na |
| chrUn | 40628509 | 40629731 | 1223 SAT1_CF | blue | na |
| chrUn | 40629751 | 40630354 | 604 SAT1_CF  | blue | na |
| chrUn | 40630366 | 40632671 | 2306 SAT1_CF | blue | na |
| chrUn | 40632684 | 40632841 | 158 SAT1_CF  | blue | na |
| chrUn | 40632908 | 40633409 | 502 SAT1_CF  | blue | na |
| chrUn | 40633422 | 40634027 | 606 SAT1_CF  | blue | na |
| chrUn | 40634040 | 40634898 | 859 SAT1_CF  | blue | na |
| chrUn | 40634911 | 40636280 | 1370 SAT1_CF | blue | na |
| chrUn | 40636323 | 40637275 | 953 SAT1_CF  | blue | na |
| chrUn | 40637354 | 40638314 | 961 SAT1_CF  | blue | na |
| chrUn | 40638354 | 40638856 | 503 SAT1_CF  | blue | na |
| chrUn | 40638868 | 40639553 | 686 SAT1_CF  | blue | na |
| chrUn | 40639565 | 40642006 | 2442 SAT1_CF | blue | na |
| chrUn | 40642018 | 40643460 | 1443 SAT1_CF | blue | na |
| chrUn | 40643476 | 40645117 | 1642 SAT1_CF | blue | na |
| chrUn | 40645129 | 40646540 | 1412 SAT1_CF | blue | na |
| chrUn | 40646553 | 40647055 | 503 SAT1_CF  | blue | na |
| chrUn | 40647068 | 40647751 | 684 SAT1_CF  | blue | na |
| chrUn | 40647763 | 40648440 | 678 SAT1_CF  | blue | na |
| chrUn | 40648483 | 40649444 | 962 SAT1_CF  | blue | na |
| chrUn | 40649511 | 40650031 | 521 SAT1_CF  | blue | na |
| chrUn | 40650044 | 40650231 | 188 SAT1_CF  | blue | na |
| chrUn | 40650283 | 40651042 | 760 SAT1_CF  | blue | na |
| chrUn | 40651120 | 40652066 | 947 SAT1_CF  | blue | na |
| chrUn | 40652119 | 40652695 | 577 SAT1_CF  | blue | na |
| chrUn | 40652717 | 40652815 | 99 SAT1_CF   | blue | na |
| chrUn | 40652836 | 40653391 | 556 SAT1_CF  | blue | na |
| chrUn | 40653403 | 40654265 | 863 SAT1_CF  | blue | na |
| chrUn | 40654306 | 40654937 | 632 SAT1_CF  | blue | na |
| chrUn | 40654965 | 40655930 | 966 SAT1_CF  | blue | na |
| chrUn | 40655944 | 40656344 | 401 SAT1_CF  | blue | na |
| chrUn | 40656384 | 40656882 | 499 SAT1_CF  | blue | na |
| chrUn | 40656895 | 40657573 | 679 SAT1_CF  | blue | na |

|       |          |          |              |        |    |
|-------|----------|----------|--------------|--------|----|
| chrUn | 40657619 | 40657944 | 326 SAT1_CF  | blue   | na |
| chrUn | 40657986 | 40658492 | 507 SAT1_CF  | blue   | na |
| chrUn | 40658510 | 40658613 | 104 SAT1_CF  | blue   | na |
| chrUn | 40658634 | 40659208 | 575 SAT1_CF  | blue   | na |
| chrUn | 40659220 | 40661347 | 2128 SAT1_CF | blue   | na |
| chrUn | 40661428 | 40661591 | 164 SAT1_CF  | blue   | na |
| chrUn | 40661772 | 40661957 | 186 SAT1_CF  | blue   | na |
| chrUn | 40661994 | 40662493 | 500 SAT1_CF  | blue   | na |
| chrUn | 40662506 | 40662898 | 393 SAT1_CF  | blue   | na |
| chrUn | 40662925 | 40663527 | 603 SAT1_CF  | blue   | na |
| chrUn | 40663539 | 40664212 | 674 SAT1_CF  | blue   | na |
| chrUn | 40664224 | 40664395 | 172 SAT1_CF  | blue   | na |
| chrUn | 40664437 | 40664980 | 544 SAT1_CF  | blue   | na |
| chrUn | 40664996 | 40666120 | 1125 SAT1_CF | blue   | na |
| chrUn | 40666132 | 40667023 | 892 SAT1_CF  | blue   | na |
| chrUn | 40667036 | 40668405 | 1370 SAT1_CF | blue   | na |
| chrUn | 40668446 | 40670476 | 2031 SAT1_CF | blue   | na |
| chrUn | 40670519 | 40671018 | 500 SAT1_CF  | blue   | na |
| chrUn | 40671031 | 40673527 | 2497 SAT1_CF | blue   | na |
| chrUn | 40673540 | 40674161 | 622 SAT1_CF  | blue   | na |
| chrUn | 40674182 | 40674856 | 675 SAT1_CF  | blue   | na |
| chrUn | 40674879 | 40675422 | 544 SAT1_CF  | blue   | na |
| chrUn | 40675465 | 40676313 | 849 SAT1_CF  | blue   | na |
| chrUn | 40676350 | 40676841 | 492 SAT1_CF  | blue   | na |
| chrUn | 40676852 | 40677657 | 806 SAT1_CF  | blue   | na |
| chrUn | 40677680 | 40679449 | 1770 SAT1_CF | blue   | na |
| chrUn | 40679489 | 40679981 | 493 SAT1_CF  | blue   | na |
| chrUn | 40680001 | 40682438 | 2438 SAT1_CF | blue   | na |
| chrUn | 40682476 | 40683495 | 1020 SAT1_CF | blue   | na |
| chrUn | 40683506 | 40683998 | 493 SAT1_CF  | blue   | na |
| chrUn | 40684012 | 40685643 | 1632 SAT1_CF | blue   | na |
| chrUn | 40685657 | 40686205 | 549 SAT1_CF  | blue   | na |
| chrUn | 40688925 | 40690177 | 1253 Sat2CF  | purple | na |
| chrUn | 40690017 | 40690205 | 189 Sat2CF   | purple | na |
| chrUn | 40692807 | 40694399 | 1593 CarSat1 | red    | na |
| chrUn | 40694420 | 40695905 | 1486 CarSat1 | red    | na |
| chrUn | 40705418 | 40705824 | 407 CarSat1  | red    | na |
| chrUn | 40705858 | 40707639 | 1782 CarSat1 | red    | na |
| chrUn | 40707658 | 40708059 | 402 CarSat1  | red    | na |
| chrUn | 40708075 | 40709462 | 1388 SAT1_CF | blue   | na |
| chrUn | 40709657 | 40709817 | 161 Sat2CF   | purple | na |
| chrUn | 40709690 | 40710638 | 949 Sat2CF   | purple | na |

|       |          |          |      |         |        |    |
|-------|----------|----------|------|---------|--------|----|
| chrUn | 40716470 | 40718009 | 1540 | CarSat1 | red    | na |
| chrUn | 40718217 | 40718808 | 592  | CarSat1 | red    | na |
| chrUn | 40727530 | 40728247 | 718  | CarSat1 | red    | na |
| chrUn | 40728439 | 40728779 | 341  | CarSat1 | red    | na |
| chrUn | 40728791 | 40728920 | 130  | Carsat2 | orange | na |
| chrUn | 40728809 | 40730250 | 1442 | CarSat1 | red    | na |
| chrUn | 40730280 | 40731591 | 1312 | CarSat1 | red    | na |
| chrUn | 40738131 | 40739010 | 880  | CarSat1 | red    | na |
| chrUn | 40739040 | 40740754 | 1715 | CarSat1 | red    | na |
| chrUn | 40740775 | 40742227 | 1453 | CarSat1 | red    | na |
| chrUn | 40742248 | 40742963 | 716  | CarSat1 | red    | na |
| chrUn | 40742984 | 40743943 | 960  | CarSat1 | red    | na |
| chrUn | 40743968 | 40744437 | 470  | CarSat1 | red    | na |
| chrUn | 40744464 | 40746649 | 2186 | CarSat1 | red    | na |
| chrUn | 40746676 | 40747555 | 880  | CarSat1 | red    | na |
| chrUn | 40838845 | 40839949 | 1105 | Sat2CF  | purple | na |
| chrUn | 40849275 | 40850122 | 848  | Sat2CF  | purple | na |
| chrUn | 40864613 | 40864988 | 376  | CarSat1 | red    | na |
| chrUn | 40865009 | 40865855 | 847  | CarSat1 | red    | na |
| chrUn | 40865872 | 40867466 | 1595 | CarSat1 | red    | na |
| chrUn | 40867487 | 40870201 | 2715 | CarSat1 | red    | na |
| chrUn | 40870213 | 40870481 | 269  | SAT1_CF | blue   | na |
| chrUn | 40870501 | 40872458 | 1958 | SAT1_CF | blue   | na |
| chrUn | 40872500 | 40873048 | 549  | SAT1_CF | blue   | na |
| chrUn | 40873095 | 40873495 | 401  | SAT1_CF | blue   | na |
| chrUn | 40873516 | 40874728 | 1213 | SAT1_CF | blue   | na |
| chrUn | 40874772 | 40876805 | 2034 | SAT1_CF | blue   | na |
| chrUn | 40876838 | 40877874 | 1037 | SAT1_CF | blue   | na |
| chrUn | 40877869 | 40878587 | 719  | CarSat1 | red    | na |
| chrUn | 40878619 | 40879044 | 426  | CarSat1 | red    | na |
| chrUn | 40950173 | 40951513 | 1341 | SAT1_CF | blue   | na |
| chrUn | 40951556 | 40952750 | 1195 | SAT1_CF | blue   | na |
| chrUn | 40952762 | 40953582 | 821  | SAT1_CF | blue   | na |
| chrUn | 40953624 | 40954164 | 541  | SAT1_CF | blue   | na |
| chrUn | 40954181 | 40954712 | 532  | SAT1_CF | blue   | na |
| chrUn | 40954724 | 40955398 | 675  | SAT1_CF | blue   | na |
| chrUn | 40955441 | 40957055 | 1615 | SAT1_CF | blue   | na |
| chrUn | 40957135 | 40957716 | 582  | SAT1_CF | blue   | na |
| chrUn | 40957728 | 40958404 | 677  | SAT1_CF | blue   | na |
| chrUn | 40958417 | 40958584 | 168  | SAT1_CF | blue   | na |
| chrUn | 40958629 | 40959173 | 545  | SAT1_CF | blue   | na |
| chrUn | 40959189 | 40959350 | 162  | SAT1_CF | blue   | na |

|       |          |          |              |      |    |
|-------|----------|----------|--------------|------|----|
| chrUn | 40959401 | 40959948 | 548 SAT1_CF  | blue | na |
| chrUn | 40960065 | 40960575 | 511 SAT1_CF  | blue | na |
| chrUn | 40960651 | 40961222 | 572 SAT1_CF  | blue | na |
| chrUn | 40961235 | 40963260 | 2026 SAT1_CF | blue | na |
| chrUn | 40963340 | 40965146 | 1807 SAT1_CF | blue | na |
| chrUn | 40965173 | 40965829 | 657 SAT1_CF  | blue | na |
| chrUn | 40965875 | 40966524 | 650 SAT1_CF  | blue | na |
| chrUn | 40966544 | 40967027 | 484 SAT1_CF  | blue | na |
| chrUn | 40967039 | 40967724 | 686 SAT1_CF  | blue | na |
| chrUn | 40967742 | 40968412 | 671 SAT1_CF  | blue | na |
| chrUn | 40968455 | 40969567 | 1113 SAT1_CF | blue | na |
| chrUn | 40969610 | 40970194 | 585 SAT1_CF  | blue | na |
| chrUn | 40970206 | 40971803 | 1598 SAT1_CF | blue | na |
| chrUn | 40971826 | 40972676 | 851 SAT1_CF  | blue | na |
| chrUn | 40972753 | 40973489 | 737 SAT1_CF  | blue | na |
| chrUn | 40973630 | 40974567 | 938 SAT1_CF  | blue | na |
| chrUn | 40974605 | 40977292 | 2688 SAT1_CF | blue | na |
| chrUn | 40977362 | 40977914 | 553 SAT1_CF  | blue | na |
| chrUn | 40977926 | 40978639 | 714 SAT1_CF  | blue | na |
| chrUn | 40978671 | 40979583 | 913 SAT1_CF  | blue | na |
| chrUn | 40979601 | 40980533 | 933 SAT1_CF  | blue | na |
| chrUn | 40980576 | 40981078 | 503 SAT1_CF  | blue | na |
| chrUn | 40981090 | 40981199 | 110 SAT1_CF  | blue | na |
| chrUn | 40981220 | 40981775 | 556 SAT1_CF  | blue | na |
| chrUn | 40981818 | 40983189 | 1372 SAT1_CF | blue | na |
| chrUn | 40983268 | 40984226 | 959 SAT1_CF  | blue | na |
| chrUn | 40984266 | 40984768 | 503 SAT1_CF  | blue | na |
| chrUn | 40984781 | 40985462 | 682 SAT1_CF  | blue | na |
| chrUn | 40985480 | 40986069 | 590 SAT1_CF  | blue | na |
| chrUn | 40986081 | 40986164 | 84 SAT1_CF   | blue | na |
| chrUn | 40986177 | 40987894 | 1718 SAT1_CF | blue | na |
| chrUn | 40987906 | 40988015 | 110 SAT1_CF  | blue | na |
| chrUn | 40988035 | 40991071 | 3037 SAT1_CF | blue | na |
| chrUn | 40991112 | 40991484 | 373 SAT1_CF  | blue | na |
| chrUn | 40991501 | 40992021 | 521 SAT1_CF  | blue | na |
| chrUn | 40992033 | 40992149 | 117 SAT1_CF  | blue | na |
| chrUn | 40992163 | 40992688 | 526 SAT1_CF  | blue | na |
| chrUn | 40992745 | 40993291 | 547 SAT1_CF  | blue | na |
| chrUn | 40993304 | 40993474 | 171 SAT1_CF  | blue | na |
| chrUn | 40993515 | 40995128 | 1614 SAT1_CF | blue | na |
| chrUn | 40995214 | 40995696 | 483 SAT1_CF  | blue | na |
| chrUn | 40995709 | 40996315 | 607 SAT1_CF  | blue | na |

|       |          |          |              |      |    |
|-------|----------|----------|--------------|------|----|
| chrUn | 40996327 | 40997002 | 676 SAT1_CF  | blue | na |
| chrUn | 40997045 | 40997676 | 632 SAT1_CF  | blue | na |
| chrUn | 40997704 | 40998791 | 1088 SAT1_CF | blue | na |
| chrUn | 40998835 | 40999383 | 549 SAT1_CF  | blue | na |
| chrUn | 40999425 | 40999968 | 544 SAT1_CF  | blue | na |
| chrUn | 41000011 | 41000520 | 510 SAT1_CF  | blue | na |
| chrUn | 41000547 | 41000681 | 135 SAT1_CF  | blue | na |
| chrUn | 41000739 | 41001241 | 503 SAT1_CF  | blue | na |
| chrUn | 41001253 | 41002504 | 1252 SAT1_CF | blue | na |
| chrUn | 41002594 | 41005714 | 3121 SAT1_CF | blue | na |
| chrUn | 41005727 | 41006949 | 1223 SAT1_CF | blue | na |
| chrUn | 41006962 | 41008291 | 1330 SAT1_CF | blue | na |
| chrUn | 41037643 | 41038023 | 381 Sat7CF   | lime | na |
| chrUn | 41094311 | 41096260 | 1950 CarSat1 | red  | na |
| chrUn | 41096275 | 41096986 | 712 CarSat1  | red  | na |
| chrUn | 41097016 | 41099931 | 2916 CarSat1 | red  | na |
| chrUn | 41099961 | 41100669 | 709 CarSat1  | red  | na |
| chrUn | 41100699 | 41101421 | 723 CarSat1  | red  | na |
| chrUn | 41101436 | 41102157 | 722 CarSat1  | red  | na |
| chrUn | 41102172 | 41103846 | 1675 CarSat1 | red  | na |
| chrUn | 41103870 | 41105092 | 1223 CarSat1 | red  | na |
| chrUn | 41105122 | 41106797 | 1676 CarSat1 | red  | na |
| chrUn | 41106821 | 41109519 | 2699 CarSat1 | red  | na |
| chrUn | 41109549 | 41110993 | 1445 CarSat1 | red  | na |
| chrUn | 41111023 | 41111735 | 713 CarSat1  | red  | na |
| chrUn | 41111765 | 41112432 | 668 CarSat1  | red  | na |
| chrUn | 41112621 | 41112682 | 62 CarSat1   | red  | na |
| chrUn | 41112712 | 41114949 | 2238 CarSat1 | red  | na |
| chrUn | 41114964 | 41116143 | 1180 CarSat1 | red  | na |
| chrUn | 41116170 | 41116881 | 712 CarSat1  | red  | na |
| chrUn | 41116908 | 41118625 | 1718 CarSat1 | red  | na |
| chrUn | 41118655 | 41119363 | 709 CarSat1  | red  | na |
| chrUn | 41119393 | 41120105 | 713 CarSat1  | red  | na |
| chrUn | 41120135 | 41123047 | 2913 CarSat1 | red  | na |
| chrUn | 41123086 | 41125256 | 2171 CarSat1 | red  | na |
| chrUn | 41125286 | 41127228 | 1943 CarSat1 | red  | na |
| chrUn | 41127454 | 41130883 | 3430 CarSat1 | red  | na |
| chrUn | 41130907 | 41132132 | 1226 CarSat1 | red  | na |
| chrUn | 41132162 | 41134352 | 2191 CarSat1 | red  | na |
| chrUn | 41134381 | 41135837 | 1457 CarSat1 | red  | na |
| chrUn | 41135852 | 41138045 | 2194 CarSat1 | red  | na |
| chrUn | 41138060 | 41138772 | 713 CarSat1  | red  | na |



|       |          |          |              |        |    |
|-------|----------|----------|--------------|--------|----|
| chrUn | 41138802 | 41139468 | 667 CarSat1  | red    | na |
| chrUn | 41139657 | 41139718 | 62 CarSat1   | red    | na |
| chrUn | 41139748 | 41141272 | 1525 CarSat1 | red    | na |
| chrUn | 41141961 | 41143957 | 1997 CarSat1 | red    | na |
| chrUn | 41144311 | 41145614 | 1304 CarSat1 | red    | na |
| chrUn | 41145644 | 41147324 | 1681 CarSat1 | red    | na |
| chrUn | 41147348 | 41150267 | 2920 CarSat1 | red    | na |
| chrUn | 41150291 | 41152249 | 1959 CarSat1 | red    | na |
| chrUn | 41152279 | 41152960 | 682 CarSat1  | red    | na |
| chrUn | 41153996 | 41155078 | 1083 CarSat1 | red    | na |
| chrUn | 41155102 | 41158663 | 3562 CarSat1 | red    | na |
| chrUn | 41159594 | 41162122 | 2529 CarSat1 | red    | na |
| chrUn | 41162159 | 41163378 | 1220 CarSat1 | red    | na |
| chrUn | 41163402 | 41164114 | 713 CarSat1  | red    | na |
| chrUn | 41164138 | 41164850 | 713 CarSat1  | red    | na |
| chrUn | 41164874 | 41166078 | 1205 CarSat1 | red    | na |
| chrUn | 41166105 | 41167794 | 1690 CarSat1 | red    | na |
| chrUn | 41167818 | 41171015 | 3198 CarSat1 | red    | na |
| chrUn | 41179679 | 41181412 | 1734 CarSat1 | red    | na |
| chrUn | 41181441 | 41186350 | 4910 CarSat1 | red    | na |
| chrUn | 41186374 | 41188043 | 1670 CarSat1 | red    | na |
| chrUn | 41188073 | 41189523 | 1451 CarSat1 | red    | na |
| chrUn | 41189553 | 41192249 | 2697 CarSat1 | red    | na |
| chrUn | 41192273 | 41193207 | 935 CarSat1  | red    | na |
| chrUn | 41193237 | 41195196 | 1960 CarSat1 | red    | na |
| chrUn | 41195220 | 41196894 | 1675 CarSat1 | red    | na |
| chrUn | 41196924 | 41197410 | 487 CarSat1  | red    | na |
| chrUn | 41197434 | 41198146 | 713 CarSat1  | red    | na |
| chrUn | 41198170 | 41198884 | 715 CarSat1  | red    | na |
| chrUn | 41198908 | 41199620 | 713 CarSat1  | red    | na |
| chrUn | 41199644 | 41200584 | 941 CarSat1  | red    | na |
| chrUn | 41200614 | 41204180 | 3567 CarSat1 | red    | na |
| chrUn | 41204495 | 41207450 | 2956 CarSat1 | red    | na |
| chrUn | 41207474 | 41208402 | 929 CarSat1  | red    | na |
| chrUn | 41208439 | 41210406 | 1968 CarSat1 | red    | na |
| chrUn | 41210430 | 41211146 | 717 CarSat1  | red    | na |
| chrUn | 41211170 | 41212621 | 1452 CarSat1 | red    | na |
| chrUn | 41212643 | 41213357 | 715 CarSat1  | red    | na |
| chrUn | 41213381 | 41215053 | 1673 CarSat1 | red    | na |
| chrUn | 41215068 | 41215195 | 128 Carsat2  | orange | na |
| chrUn | 41215083 | 41215791 | 709 CarSat1  | red    | na |
| chrUn | 41215806 | 41215932 | 127 Carsat2  | orange | na |

|       |          |          |      |         |     |    |
|-------|----------|----------|------|---------|-----|----|
| chrUn | 41215821 | 41217043 | 1223 | CarSat1 | red | na |
| chrUn | 41217067 | 41217784 | 718  | CarSat1 | red | na |
| chrUn | 41217800 | 41218733 | 934  | CarSat1 | red | na |
| chrUn | 41218764 | 41219356 | 593  | CarSat1 | red | na |
| chrUn | 41277888 | 41279285 | 1398 | CarSat1 | red | na |
| chrUn | 41279316 | 41280903 | 1588 | CarSat1 | red | na |
| chrUn | 41280934 | 41282522 | 1589 | CarSat1 | red | na |
| chrUn | 41282553 | 41284143 | 1591 | CarSat1 | red | na |
| chrUn | 41284174 | 41285764 | 1591 | CarSat1 | red | na |
| chrUn | 41285795 | 41287380 | 1586 | CarSat1 | red | na |
| chrUn | 41287672 | 41289023 | 1352 | CarSat1 | red | na |
| chrUn | 41289054 | 41290646 | 1593 | CarSat1 | red | na |
| chrUn | 41290677 | 41292265 | 1589 | CarSat1 | red | na |
| chrUn | 41292296 | 41293882 | 1587 | CarSat1 | red | na |
| chrUn | 41293913 | 41295501 | 1589 | CarSat1 | red | na |
| chrUn | 41295532 | 41297117 | 1586 | CarSat1 | red | na |
| chrUn | 41297148 | 41298733 | 1586 | CarSat1 | red | na |
| chrUn | 41298764 | 41300351 | 1588 | CarSat1 | red | na |
| chrUn | 41300382 | 41301966 | 1585 | CarSat1 | red | na |
| chrUn | 41317369 | 41318418 | 1050 | CarSat1 | red | na |
| chrUn | 41318439 | 41320041 | 1603 | CarSat1 | red | na |
| chrUn | 41320072 | 41321664 | 1593 | CarSat1 | red | na |
| chrUn | 41321685 | 41323287 | 1603 | CarSat1 | red | na |
| chrUn | 41323318 | 41324570 | 1253 | CarSat1 | red | na |
| chrUn | 41324602 | 41327265 | 2664 | CarSat1 | red | na |
| chrUn | 41327286 | 41327857 | 572  | CarSat1 | red | na |
| chrUn | 41328058 | 41328811 | 754  | CarSat1 | red | na |
| chrUn | 41328842 | 41330433 | 1592 | CarSat1 | red | na |
| chrUn | 41330464 | 41332052 | 1589 | CarSat1 | red | na |
| chrUn | 41332083 | 41333673 | 1591 | CarSat1 | red | na |
| chrUn | 41333704 | 41335292 | 1589 | CarSat1 | red | na |
| chrUn | 41335323 | 41336849 | 1527 | CarSat1 | red | na |
| chrUn | 41430934 | 41432473 | 1540 | CarSat1 | red | na |
| chrUn | 41432686 | 41433278 | 593  | CarSat1 | red | na |
| chrUn | 41441795 | 41442494 | 700  | CarSat1 | red | na |
| chrUn | 41442688 | 41443299 | 612  | CarSat1 | red | na |
| chrUn | 41443316 | 41447225 | 3910 | CarSat1 | red | na |
| chrUn | 41447251 | 41448700 | 1450 | CarSat1 | red | na |
| chrUn | 41448716 | 41449922 | 1207 | CarSat1 | red | na |
| chrUn | 41449949 | 41452871 | 2923 | CarSat1 | red | na |
| chrUn | 41452898 | 41453608 | 711  | CarSat1 | red | na |
| chrUn | 41453635 | 41454598 | 964  | CarSat1 | red | na |

|       |          |          |      |         |        |    |
|-------|----------|----------|------|---------|--------|----|
| chrUn | 41454614 | 41455083 | 470  | CarSat1 | red    | na |
| chrUn | 41455110 | 41455820 | 711  | CarSat1 | red    | na |
| chrUn | 41455847 | 41456558 | 712  | CarSat1 | red    | na |
| chrUn | 41456585 | 41458771 | 2187 | CarSat1 | red    | na |
| chrUn | 41458798 | 41459776 | 979  | CarSat1 | red    | na |
| chrUn | 41459801 | 41461245 | 1445 | CarSat1 | red    | na |
| chrUn | 41461265 | 41461717 | 453  | CarSat1 | red    | na |
| chrUn | 41461750 | 41461947 | 198  | Carsat2 | orange | na |
| chrUn | 41461779 | 41462753 | 975  | CarSat1 | red    | na |
| chrUn | 41462777 | 41463489 | 713  | CarSat1 | red    | na |
| chrUn | 41463513 | 41464233 | 721  | CarSat1 | red    | na |
| chrUn | 41464259 | 41466434 | 2176 | CarSat1 | red    | na |
| chrUn | 41466458 | 41467178 | 721  | CarSat1 | red    | na |
| chrUn | 41467204 | 41467907 | 704  | CarSat1 | red    | na |
| chrUn | 41467931 | 41469602 | 1672 | CarSat1 | red    | na |
| chrUn | 41469632 | 41470339 | 708  | CarSat1 | red    | na |
| chrUn | 41470369 | 41471588 | 1220 | CarSat1 | red    | na |
| chrUn | 41471621 | 41472324 | 704  | CarSat1 | red    | na |
| chrUn | 41472348 | 41473068 | 721  | CarSat1 | red    | na |
| chrUn | 41473094 | 41473797 | 704  | CarSat1 | red    | na |
| chrUn | 41473821 | 41475492 | 1672 | CarSat1 | red    | na |
| chrUn | 41475522 | 41476229 | 708  | CarSat1 | red    | na |
| chrUn | 41476259 | 41479171 | 2913 | CarSat1 | red    | na |
| chrUn | 41479201 | 41479905 | 705  | CarSat1 | red    | na |
| chrUn | 41479920 | 41480046 | 127  | Carsat2 | orange | na |
| chrUn | 41479935 | 41481160 | 1226 | CarSat1 | red    | na |
| chrUn | 41481192 | 41482102 | 911  | CarSat1 | red    | na |
| chrUn | 41482132 | 41483247 | 1116 | CarSat1 | red    | na |
| chrUn | 41539618 | 41541233 | 1616 | CarSat1 | red    | na |
| chrUn | 41542460 | 41543076 | 617  | CarSat1 | red    | na |
| chrUn | 41543123 | 41543806 | 684  | CarSat1 | red    | na |
| chrUn | 41543889 | 41544403 | 515  | CarSat1 | red    | na |
| chrUn | 41545546 | 41546843 | 1298 | CarSat1 | red    | na |
| chrUn | 41546875 | 41547777 | 903  | CarSat1 | red    | na |
| chrUn | 41549202 | 41551610 | 2409 | CarSat1 | red    | na |
| chrUn | 41553298 | 41553730 | 433  | CarSat1 | red    | na |
| chrUn | 41553764 | 41555932 | 2169 | CarSat1 | red    | na |
| chrUn | 41556544 | 41557394 | 851  | CarSat1 | red    | na |
| chrUn | 41557424 | 41558914 | 1491 | CarSat1 | red    | na |
| chrUn | 41558925 | 41565836 | 6912 | CarSat1 | red    | na |
| chrUn | 41568221 | 41571696 | 3476 | CarSat1 | red    | na |
| chrUn | 41571760 | 41572719 | 960  | CarSat1 | red    | na |

|       |          |          |      |         |        |    |
|-------|----------|----------|------|---------|--------|----|
| chrUn | 41572735 | 41573619 | 885  | CarSat1 | red    | na |
| chrUn | 41575178 | 41576127 | 950  | CarSat1 | red    | na |
| chrUn | 41576154 | 41576708 | 555  | CarSat1 | red    | na |
| chrUn | 41577599 | 41579833 | 2235 | CarSat1 | red    | na |
| chrUn | 41580586 | 41581913 | 1328 | CarSat1 | red    | na |
| chrUn | 41581929 | 41582650 | 722  | CarSat1 | red    | na |
| chrUn | 41582675 | 41583134 | 460  | CarSat1 | red    | na |
| chrUn | 41583161 | 41585088 | 1928 | CarSat1 | red    | na |
| chrUn | 41585114 | 41585175 | 62   | CarSat1 | red    | na |
| chrUn | 41585364 | 41586760 | 1397 | CarSat1 | red    | na |
| chrUn | 41586786 | 41587495 | 710  | CarSat1 | red    | na |
| chrUn | 41587521 | 41587582 | 62   | CarSat1 | red    | na |
| chrUn | 41587771 | 41589052 | 1282 | CarSat1 | red    | na |
| chrUn | 41589650 | 41590496 | 847  | CarSat1 | red    | na |
| chrUn | 41590521 | 41590980 | 460  | CarSat1 | red    | na |
| chrUn | 41591007 | 41592898 | 1892 | CarSat1 | red    | na |
| chrUn | 41593515 | 41594686 | 1172 | CarSat1 | red    | na |
| chrUn | 41594713 | 41595420 | 708  | CarSat1 | red    | na |
| chrUn | 41595445 | 41596408 | 964  | CarSat1 | red    | na |
| chrUn | 41597022 | 41597585 | 564  | CarSat1 | red    | na |
| chrUn | 41597622 | 41598766 | 1145 | CarSat1 | red    | na |
| chrUn | 41600087 | 41600998 | 912  | CarSat1 | red    | na |
| chrUn | 41601025 | 41601731 | 707  | CarSat1 | red    | na |
| chrUn | 41601758 | 41602712 | 955  | CarSat1 | red    | na |
| chrUn | 41602737 | 41603617 | 881  | CarSat1 | red    | na |
| chrUn | 41604297 | 41605301 | 1005 | CarSat1 | red    | na |
| chrUn | 41605494 | 41608289 | 2796 | CarSat1 | red    | na |
| chrUn | 41608318 | 41608749 | 432  | CarSat1 | red    | na |
| chrUn | 41609837 | 41610372 | 536  | Sat2CF  | purple | na |
| chrUn | 41623276 | 41624496 | 1221 | Sat2CF  | purple | na |
| chrUn | 41639622 | 41640808 | 1187 | Sat2CF  | purple | na |
| chrUn | 41726929 | 41728046 | 1118 | SAT1_CF | blue   | na |
| chrUn | 41728126 | 41729352 | 1227 | SAT1_CF | blue   | na |
| chrUn | 41729429 | 41730900 | 1472 | SAT1_CF | blue   | na |
| chrUn | 41730913 | 41731076 | 164  | SAT1_CF | blue   | na |
| chrUn | 41731095 | 41731536 | 442  | SAT1_CF | blue   | na |
| chrUn | 41731678 | 41732199 | 522  | SAT1_CF | blue   | na |
| chrUn | 41732246 | 41732381 | 136  | SAT1_CF | blue   | na |
| chrUn | 41732413 | 41732920 | 508  | SAT1_CF | blue   | na |
| chrUn | 41732963 | 41733526 | 564  | SAT1_CF | blue   | na |
| chrUn | 41733607 | 41734258 | 652  | SAT1_CF | blue   | na |
| chrUn | 41734301 | 41734967 | 667  | SAT1_CF | blue   | na |

|       |          |          |              |      |    |
|-------|----------|----------|--------------|------|----|
| chrUn | 41734989 | 41735671 | 683 SAT1_CF  | blue | na |
| chrUn | 41735684 | 41736202 | 519 SAT1_CF  | blue | na |
| chrUn | 41736239 | 41736587 | 349 SAT1_CF  | blue | na |
| chrUn | 41736620 | 41737656 | 1037 SAT1_CF | blue | na |
| chrUn | 41737684 | 41738209 | 526 SAT1_CF  | blue | na |
| chrUn | 41738254 | 41738926 | 673 SAT1_CF  | blue | na |
| chrUn | 41738938 | 41741343 | 2406 SAT1_CF | blue | na |
| chrUn | 41741385 | 41742054 | 670 SAT1_CF  | blue | na |
| chrUn | 41742066 | 41743260 | 1195 SAT1_CF | blue | na |
| chrUn | 41743316 | 41743665 | 350 SAT1_CF  | blue | na |
| chrUn | 41743698 | 41744247 | 550 SAT1_CF  | blue | na |
| chrUn | 41744324 | 41745287 | 964 SAT1_CF  | blue | na |
| chrUn | 41745332 | 41745958 | 627 SAT1_CF  | blue | na |
| chrUn | 41745992 | 41747447 | 1456 SAT1_CF | blue | na |
| chrUn | 41747477 | 41747905 | 429 SAT1_CF  | blue | na |
| chrUn | 41747949 | 41749280 | 1332 SAT1_CF | blue | na |
| chrUn | 41749292 | 41749895 | 604 SAT1_CF  | blue | na |
| chrUn | 41749908 | 41750429 | 522 SAT1_CF  | blue | na |
| chrUn | 41750463 | 41751410 | 948 SAT1_CF  | blue | na |
| chrUn | 41751434 | 41751506 | 73 SAT1_CF   | blue | na |
| chrUn | 41751518 | 41752106 | 589 SAT1_CF  | blue | na |
| chrUn | 41752124 | 41752804 | 681 SAT1_CF  | blue | na |
| chrUn | 41752817 | 41753319 | 503 SAT1_CF  | blue | na |
| chrUn | 41753372 | 41753691 | 320 SAT1_CF  | blue | na |
| chrUn | 41753703 | 41754305 | 603 SAT1_CF  | blue | na |
| chrUn | 41754355 | 41755726 | 1372 SAT1_CF | blue | na |
| chrUn | 41755769 | 41756531 | 763 SAT1_CF  | blue | na |
| chrUn | 41756543 | 41757045 | 503 SAT1_CF  | blue | na |
| chrUn | 41757087 | 41758019 | 933 SAT1_CF  | blue | na |
| chrUn | 41758037 | 41758214 | 178 SAT1_CF  | blue | na |
| chrUn | 41758692 | 41759784 | 1093 SAT1_CF | blue | na |
| chrUn | 41759797 | 41760350 | 554 SAT1_CF  | blue | na |
| chrUn | 41760404 | 41760545 | 142 SAT1_CF  | blue | na |
| chrUn | 41761928 | 41763442 | 1515 SAT1_CF | blue | na |
| chrUn | 41763500 | 41764175 | 676 SAT1_CF  | blue | na |
| chrUn | 41764187 | 41764789 | 603 SAT1_CF  | blue | na |
| chrUn | 41764802 | 41765323 | 522 SAT1_CF  | blue | na |
| chrUn | 41765349 | 41765506 | 158 SAT1_CF  | blue | na |
| chrUn | 41765538 | 41766041 | 504 SAT1_CF  | blue | na |
| chrUn | 41766073 | 41767310 | 1238 SAT1_CF | blue | na |
| chrUn | 41767333 | 41768267 | 935 SAT1_CF  | blue | na |
| chrUn | 41768299 | 41769543 | 1245 SAT1_CF | blue | na |

|       |          |          |              |      |    |
|-------|----------|----------|--------------|------|----|
| chrUn | 41769571 | 41771435 | 1865 SAT1_CF | blue | na |
| chrUn | 41771478 | 41772148 | 671 SAT1_CF  | blue | na |
| chrUn | 41772166 | 41772850 | 685 SAT1_CF  | blue | na |
| chrUn | 41772863 | 41773753 | 891 SAT1_CF  | blue | na |
| chrUn | 41773765 | 41775364 | 1600 SAT1_CF | blue | na |
| chrUn | 41775445 | 41775994 | 550 SAT1_CF  | blue | na |
| chrUn | 41776037 | 41777100 | 1064 SAT1_CF | blue | na |
| chrUn | 41777151 | 41777312 | 162 SAT1_CF  | blue | na |
| chrUn | 41777328 | 41777871 | 544 SAT1_CF  | blue | na |
| chrUn | 41777913 | 41779467 | 1555 SAT1_CF | blue | na |
| chrUn | 41779480 | 41779998 | 519 SAT1_CF  | blue | na |
| chrUn | 41904988 | 41905720 | 733 SAT1_CF  | blue | na |
| chrUn | 41905762 | 41907551 | 1790 SAT1_CF | blue | na |
| chrUn | 41907563 | 41908454 | 892 SAT1_CF  | blue | na |
| chrUn | 41908467 | 41909835 | 1369 SAT1_CF | blue | na |
| chrUn | 41909880 | 41911654 | 1775 SAT1_CF | blue | na |
| chrUn | 41911694 | 41914236 | 2543 SAT1_CF | blue | na |
| chrUn | 41914249 | 41915616 | 1368 SAT1_CF | blue | na |
| chrUn | 41915659 | 41917686 | 2028 SAT1_CF | blue | na |
| chrUn | 41917699 | 41918201 | 503 SAT1_CF  | blue | na |
| chrUn | 41918223 | 41920287 | 2065 SAT1_CF | blue | na |
| chrUn | 41920307 | 41920507 | 201 SAT1_CF  | blue | na |
| chrUn | 41920520 | 41921877 | 1358 SAT1_CF | blue | na |
| chrUn | 41921920 | 41924035 | 2116 SAT1_CF | blue | na |
| chrUn | 41924050 | 41924746 | 697 SAT1_CF  | blue | na |
| chrUn | 41924766 | 41925449 | 684 SAT1_CF  | blue | na |
| chrUn | 41925467 | 41926141 | 675 SAT1_CF  | blue | na |
| chrUn | 41926190 | 41927794 | 1605 SAT1_CF | blue | na |
| chrUn | 41927838 | 41928636 | 799 SAT1_CF  | blue | na |
| chrUn | 41928649 | 41930017 | 1369 SAT1_CF | blue | na |
| chrUn | 41930050 | 41930614 | 565 SAT1_CF  | blue | na |
| chrUn | 41930654 | 41931241 | 588 SAT1_CF  | blue | na |
| chrUn | 41931297 | 41932338 | 1042 SAT1_CF | blue | na |
| chrUn | 41932350 | 41933212 | 863 SAT1_CF  | blue | na |
| chrUn | 41933392 | 41934114 | 723 SAT1_CF  | blue | na |
| chrUn | 41934127 | 41934739 | 613 SAT1_CF  | blue | na |
| chrUn | 41934751 | 41935599 | 849 SAT1_CF  | blue | na |
| chrUn | 41935684 | 41936229 | 546 SAT1_CF  | blue | na |
| chrUn | 41936255 | 41937089 | 835 SAT1_CF  | blue | na |
| chrUn | 41937109 | 41937456 | 348 SAT1_CF  | blue | na |
| chrUn | 41937574 | 41938812 | 1239 SAT1_CF | blue | na |
| chrUn | 41938824 | 41939545 | 722 SAT1_CF  | blue | na |

|       |          |          |              |      |    |
|-------|----------|----------|--------------|------|----|
| chrUn | 41939568 | 41940896 | 1329 SAT1_CF | blue | na |
| chrUn | 41940928 | 41941925 | 998 SAT1_CF  | blue | na |
| chrUn | 41941959 | 41942751 | 793 SAT1_CF  | blue | na |
| chrUn | 41942763 | 41943439 | 677 SAT1_CF  | blue | na |
| chrUn | 41943488 | 41944682 | 1195 SAT1_CF | blue | na |
| chrUn | 41944725 | 41945250 | 526 SAT1_CF  | blue | na |
| chrUn | 41945265 | 41945401 | 137 SAT1_CF  | blue | na |
| chrUn | 41945469 | 41945969 | 501 SAT1_CF  | blue | na |
| chrUn | 41945980 | 41946089 | 110 SAT1_CF  | blue | na |
| chrUn | 41946111 | 41946664 | 554 SAT1_CF  | blue | na |
| chrUn | 41946676 | 41947438 | 763 SAT1_CF  | blue | na |
| chrUn | 41947450 | 41948782 | 1333 SAT1_CF | blue | na |
| chrUn | 41948826 | 41950152 | 1327 SAT1_CF | blue | na |
| chrUn | 41950239 | 41950740 | 502 SAT1_CF  | blue | na |
| chrUn | 41950752 | 41950858 | 107 SAT1_CF  | blue | na |
| chrUn | 41950882 | 41951508 | 627 SAT1_CF  | blue | na |
| chrUn | 41951532 | 41951983 | 452 SAT1_CF  | blue | na |
| chrUn | 41951996 | 41952868 | 873 SAT1_CF  | blue | na |
| chrUn | 41952953 | 41953472 | 520 SAT1_CF  | blue | na |
| chrUn | 41953529 | 41954697 | 1169 SAT1_CF | blue | na |
| chrUn | 41954794 | 41955936 | 1143 SAT1_CF | blue | na |
| chrUn | 41955978 | 41956476 | 499 SAT1_CF  | blue | na |
| chrUn | 41956493 | 41957172 | 680 SAT1_CF  | blue | na |
| chrUn | 41957185 | 41957260 | 76 SAT1_CF   | blue | na |
| chrUn | 41957278 | 41957515 | 238 SAT1_CF  | blue | na |
| chrUn | 41958537 | 41959195 | 659 SAT1_CF  | blue | na |
| chrUn | 41959207 | 41960098 | 892 SAT1_CF  | blue | na |
| chrUn | 41960111 | 41960274 | 164 SAT1_CF  | blue | na |
| chrUn | 41960313 | 41960515 | 203 SAT1_CF  | blue | na |
| chrUn | 41960532 | 41961076 | 545 SAT1_CF  | blue | na |
| chrUn | 41961088 | 41961773 | 686 SAT1_CF  | blue | na |
| chrUn | 41961791 | 41962461 | 671 SAT1_CF  | blue | na |
| chrUn | 41962504 | 41964123 | 1620 SAT1_CF | blue | na |
| chrUn | 41964134 | 41964614 | 481 SAT1_CF  | blue | na |
| chrUn | 41964753 | 41965689 | 937 SAT1_CF  | blue | na |
| chrUn | 41965727 | 41966227 | 501 SAT1_CF  | blue | na |
| chrUn | 41966249 | 41967872 | 1624 SAT1_CF | blue | na |
| chrUn | 41967886 | 41968448 | 563 SAT1_CF  | blue | na |
| chrUn | 41969856 | 41970434 | 579 SAT1_CF  | blue | na |
| chrUn | 41970494 | 41971706 | 1213 SAT1_CF | blue | na |
| chrUn | 41971982 | 41973380 | 1399 SAT1_CF | blue | na |
| chrUn | 41973424 | 41974352 | 929 SAT1_CF  | blue | na |

|       |          |          |              |      |    |
|-------|----------|----------|--------------|------|----|
| chrUn | 41974365 | 41975047 | 683 SAT1_CF  | blue | na |
| chrUn | 41975058 | 41975687 | 630 SAT1_CF  | blue | na |
| chrUn | 41975702 | 41976404 | 703 SAT1_CF  | blue | na |
| chrUn | 41976430 | 41977101 | 672 SAT1_CF  | blue | na |
| chrUn | 41977113 | 41977789 | 677 SAT1_CF  | blue | na |
| chrUn | 41977850 | 41978722 | 873 SAT1_CF  | blue | na |
| chrUn | 41978735 | 41978839 | 105 SAT1_CF  | blue | na |
| chrUn | 41978864 | 41980104 | 1241 SAT1_CF | blue | na |
| chrUn | 41980151 | 41981330 | 1180 SAT1_CF | blue | na |
| chrUn | 41981344 | 41982331 | 988 SAT1_CF  | blue | na |
| chrUn | 41982358 | 41982515 | 158 SAT1_CF  | blue | na |
| chrUn | 41982560 | 41983058 | 499 SAT1_CF  | blue | na |
| chrUn | 41983073 | 41983182 | 110 SAT1_CF  | blue | na |
| chrUn | 41983203 | 41983834 | 632 SAT1_CF  | blue | na |
| chrUn | 41983846 | 41984245 | 400 SAT1_CF  | blue | na |
| chrUn | 41984257 | 41984776 | 520 SAT1_CF  | blue | na |
| chrUn | 41984822 | 41985732 | 911 SAT1_CF  | blue | na |
| chrUn | 41985777 | 41989003 | 3227 SAT1_CF | blue | na |
| chrUn | 41989016 | 41989191 | 176 SAT1_CF  | blue | na |
| chrUn | 41989220 | 41989741 | 522 SAT1_CF  | blue | na |
| chrUn | 41989754 | 41991767 | 2014 SAT1_CF | blue | na |
| chrUn | 41991786 | 41992339 | 554 SAT1_CF  | blue | na |
| chrUn | 41992381 | 41993010 | 630 SAT1_CF  | blue | na |
| chrUn | 41993038 | 41993548 | 511 SAT1_CF  | blue | na |
| chrUn | 41993618 | 41994951 | 1334 SAT1_CF | blue | na |
| chrUn | 41994963 | 41995823 | 861 SAT1_CF  | blue | na |
| chrUn | 41995865 | 41996406 | 542 SAT1_CF  | blue | na |
| chrUn | 41996444 | 41997492 | 1049 SAT1_CF | blue | na |
| chrUn | 41997518 | 41998039 | 522 SAT1_CF  | blue | na |
| chrUn | 41998052 | 41998734 | 683 SAT1_CF  | blue | na |
| chrUn | 41998746 | 41999610 | 865 SAT1_CF  | blue | na |
| chrUn | 41999652 | 42001503 | 1852 SAT1_CF | blue | na |
| chrUn | 42001524 | 42002167 | 644 SAT1_CF  | blue | na |
| chrUn | 42117810 | 42119148 | 1339 SAT1_CF | blue | na |
| chrUn | 42119165 | 42120428 | 1264 SAT1_CF | blue | na |
| chrUn | 42120440 | 42121201 | 762 SAT1_CF  | blue | na |
| chrUn | 42121214 | 42121716 | 503 SAT1_CF  | blue | na |
| chrUn | 42121756 | 42122714 | 959 SAT1_CF  | blue | na |
| chrUn | 42122793 | 42123755 | 963 SAT1_CF  | blue | na |
| chrUn | 42123798 | 42124463 | 666 SAT1_CF  | blue | na |
| chrUn | 42124486 | 42125097 | 612 SAT1_CF  | blue | na |
| chrUn | 42125108 | 42125661 | 554 SAT1_CF  | blue | na |



|       |          |          |              |      |    |
|-------|----------|----------|--------------|------|----|
| chrUn | 42125704 | 42126266 | 563 SAT1_CF  | blue | na |
| chrUn | 42126331 | 42127020 | 690 SAT1_CF  | blue | na |
| chrUn | 42127040 | 42127695 | 656 SAT1_CF  | blue | na |
| chrUn | 42127709 | 42128201 | 493 SAT1_CF  | blue | na |
| chrUn | 42128212 | 42129292 | 1081 SAT1_CF | blue | na |
| chrUn | 42129303 | 42129946 | 644 SAT1_CF  | blue | na |
| chrUn | 42129959 | 42130593 | 635 SAT1_CF  | blue | na |
| chrUn | 42130615 | 42131136 | 522 SAT1_CF  | blue | na |
| chrUn | 42131183 | 42131319 | 137 SAT1_CF  | blue | na |
| chrUn | 42131347 | 42133199 | 1853 SAT1_CF | blue | na |
| chrUn | 42133242 | 42133906 | 665 SAT1_CF  | blue | na |
| chrUn | 42133929 | 42134936 | 1008 SAT1_CF | blue | na |
| chrUn | 42136338 | 42136933 | 596 SAT1_CF  | blue | na |
| chrUn | 42136982 | 42137627 | 646 SAT1_CF  | blue | na |
| chrUn | 42137669 | 42137981 | 313 SAT1_CF  | blue | na |
| chrUn | 42138023 | 42138543 | 521 SAT1_CF  | blue | na |
| chrUn | 42138577 | 42138941 | 365 SAT1_CF  | blue | na |
| chrUn | 42138973 | 42141759 | 2787 SAT1_CF | blue | na |
| chrUn | 42141801 | 42142666 | 866 SAT1_CF  | blue | na |
| chrUn | 42142678 | 42143231 | 554 SAT1_CF  | blue | na |
| chrUn | 42143252 | 42143357 | 106 SAT1_CF  | blue | na |
| chrUn | 42143370 | 42143972 | 603 SAT1_CF  | blue | na |
| chrUn | 42143984 | 42144616 | 633 SAT1_CF  | blue | na |
| chrUn | 42144673 | 42146591 | 1919 SAT1_CF | blue | na |
| chrUn | 42146603 | 42147158 | 556 SAT1_CF  | blue | na |
| chrUn | 42147179 | 42147276 | 98 SAT1_CF   | blue | na |
| chrUn | 42147299 | 42149389 | 2091 SAT1_CF | blue | na |
| chrUn | 42149416 | 42149896 | 481 SAT1_CF  | blue | na |
| chrUn | 42149956 | 42151335 | 1380 SAT1_CF | blue | na |
| chrUn | 42151378 | 42153367 | 1990 SAT1_CF | blue | na |
| chrUn | 42153387 | 42153882 | 496 SAT1_CF  | blue | na |
| chrUn | 42153927 | 42154034 | 108 SAT1_CF  | blue | na |
| chrUn | 42154097 | 42154619 | 523 SAT1_CF  | blue | na |
| chrUn | 42154649 | 42155463 | 815 SAT1_CF  | blue | na |
| chrUn | 42155476 | 42157063 | 1588 SAT1_CF | blue | na |
| chrUn | 42157075 | 42157758 | 684 SAT1_CF  | blue | na |
| chrUn | 42157770 | 42158529 | 760 SAT1_CF  | blue | na |
| chrUn | 42158542 | 42159041 | 500 SAT1_CF  | blue | na |
| chrUn | 42159086 | 42159241 | 156 SAT1_CF  | blue | na |
| chrUn | 42159453 | 42160559 | 1107 SAT1_CF | blue | na |
| chrUn | 42160616 | 42161140 | 525 SAT1_CF  | blue | na |
| chrUn | 42161158 | 42162310 | 1153 SAT1_CF | blue | na |

|       |          |          |              |        |    |
|-------|----------|----------|--------------|--------|----|
| chrUn | 42162353 | 42163250 | 898 SAT1_CF  | blue   | na |
| chrUn | 42163272 | 42163563 | 292 SAT1_CF  | blue   | na |
| chrUn | 42163607 | 42164241 | 635 SAT1_CF  | blue   | na |
| chrUn | 42164263 | 42164784 | 522 SAT1_CF  | blue   | na |
| chrUn | 42164831 | 42164967 | 137 SAT1_CF  | blue   | na |
| chrUn | 42164995 | 42166848 | 1854 SAT1_CF | blue   | na |
| chrUn | 42166891 | 42169358 | 2468 SAT1_CF | blue   | na |
| chrUn | 42170887 | 42171474 | 588 CarSat1  | red    | na |
| chrUn | 42171675 | 42172589 | 915 CarSat1  | red    | na |
| chrUn | 42172620 | 42174040 | 1421 CarSat1 | red    | na |
| chrUn | 42174245 | 42174958 | 714 CarSat1  | red    | na |
| chrUn | 42183532 | 42184119 | 588 CarSat1  | red    | na |
| chrUn | 42184320 | 42185418 | 1099 CarSat1 | red    | na |
| chrUn | 42185452 | 42185859 | 408 CarSat1  | red    | na |
| chrUn | 42191646 | 42192655 | 1010 Sat2CF  | purple | na |
| chrUn | 42191709 | 42192569 | 861 Sat2CF   | purple | na |
| chrUn | 42192884 | 42193813 | 930 SAT1_CF  | blue   | na |
| chrUn | 42193843 | 42194256 | 414 SAT1_CF  | blue   | na |
| chrUn | 42194278 | 42194679 | 402 CarSat1  | red    | na |
| chrUn | 42194698 | 42196477 | 1780 CarSat1 | red    | na |
| chrUn | 42196511 | 42196916 | 406 CarSat1  | red    | na |
| chrUn | 42205957 | 42206523 | 567 CarSat1  | red    | na |
| chrUn | 42206713 | 42206834 | 122 CarSat1  | red    | na |
| chrUn | 42206852 | 42207647 | 796 CarSat1  | red    | na |
| chrUn | 42207674 | 42208116 | 443 CarSat1  | red    | na |
| chrUn | 42208293 | 42209387 | 1095 CarSat1 | red    | na |
| chrUn | 42212041 | 42212242 | 202 Sat2CF   | purple | na |
| chrUn | 42212082 | 42213332 | 1251 Sat2CF  | purple | na |
| chrUn | 42212118 | 42213202 | 1085 Sat2CF  | purple | na |
| chrUn | 42239571 | 42240212 | 642 SAT1_CF  | blue   | na |
| chrUn | 42240233 | 42241217 | 985 SAT1_CF  | blue   | na |
| chrUn | 42241233 | 42242305 | 1073 SAT1_CF | blue   | na |
| chrUn | 42242349 | 42242991 | 643 SAT1_CF  | blue   | na |
| chrUn | 42243003 | 42243686 | 684 SAT1_CF  | blue   | na |
| chrUn | 42243699 | 42244219 | 521 SAT1_CF  | blue   | na |
| chrUn | 42244266 | 42244423 | 158 SAT1_CF  | blue   | na |
| chrUn | 42244438 | 42245879 | 1442 SAT1_CF | blue   | na |
| chrUn | 42245921 | 42246780 | 860 SAT1_CF  | blue   | na |
| chrUn | 42246792 | 42247305 | 514 SAT1_CF  | blue   | na |
| chrUn | 42247327 | 42247399 | 73 SAT1_CF   | blue   | na |
| chrUn | 42247412 | 42247912 | 501 SAT1_CF  | blue   | na |
| chrUn | 42247999 | 42249220 | 1222 SAT1_CF | blue   | na |

|       |          |          |              |      |    |
|-------|----------|----------|--------------|------|----|
| chrUn | 42249232 | 42249752 | 521 SAT1_CF  | blue | na |
| chrUn | 42249768 | 42250256 | 489 SAT1_CF  | blue | na |
| chrUn | 42250299 | 42250799 | 501 SAT1_CF  | blue | na |
| chrUn | 42250839 | 42251982 | 1144 SAT1_CF | blue | na |
| chrUn | 42251996 | 42252391 | 396 SAT1_CF  | blue | na |
| chrUn | 42252412 | 42252534 | 123 SAT1_CF  | blue | na |
| chrUn | 42252546 | 42253796 | 1251 SAT1_CF | blue | na |
| chrUn | 42253819 | 42253925 | 107 SAT1_CF  | blue | na |
| chrUn | 42253938 | 42254642 | 705 SAT1_CF  | blue | na |
| chrUn | 42254657 | 42255179 | 523 SAT1_CF  | blue | na |
| chrUn | 42255211 | 42255784 | 574 SAT1_CF  | blue | na |
| chrUn | 42255811 | 42256210 | 400 SAT1_CF  | blue | na |
| chrUn | 42256222 | 42257396 | 1175 SAT1_CF | blue | na |
| chrUn | 42257459 | 42259558 | 2100 SAT1_CF | blue | na |
| chrUn | 42259571 | 42260273 | 703 SAT1_CF  | blue | na |
| chrUn | 42260288 | 42260754 | 467 SAT1_CF  | blue | na |
| chrUn | 42260940 | 42261648 | 709 SAT1_CF  | blue | na |
| chrUn | 42261664 | 42262207 | 544 SAT1_CF  | blue | na |
| chrUn | 42262249 | 42263532 | 1284 SAT1_CF | blue | na |
| chrUn | 42263576 | 42266035 | 2460 SAT1_CF | blue | na |
| chrUn | 42381729 | 42381876 | 148 SAT1_CF  | blue | na |
| chrUn | 42381931 | 42382433 | 503 SAT1_CF  | blue | na |
| chrUn | 42382450 | 42383328 | 879 SAT1_CF  | blue | na |
| chrUn | 42384961 | 42385534 | 574 SAT1_CF  | blue | na |
| chrUn | 42385574 | 42386080 | 507 SAT1_CF  | blue | na |
| chrUn | 42386093 | 42386199 | 107 SAT1_CF  | blue | na |
| chrUn | 42386221 | 42386939 | 719 SAT1_CF  | blue | na |
| chrUn | 42386994 | 42388781 | 1788 SAT1_CF | blue | na |
| chrUn | 42388853 | 42389353 | 501 SAT1_CF  | blue | na |
| chrUn | 42389367 | 42390038 | 672 SAT1_CF  | blue | na |
| chrUn | 42390050 | 42390159 | 110 SAT1_CF  | blue | na |
| chrUn | 42390179 | 42390724 | 546 SAT1_CF  | blue | na |
| chrUn | 42390756 | 42391344 | 589 SAT1_CF  | blue | na |
| chrUn | 42391357 | 42391859 | 503 SAT1_CF  | blue | na |
| chrUn | 42391872 | 42392666 | 795 SAT1_CF  | blue | na |
| chrUn | 42392678 | 42393360 | 683 SAT1_CF  | blue | na |
| chrUn | 42393373 | 42394054 | 682 SAT1_CF  | blue | na |
| chrUn | 42394066 | 42395658 | 1593 SAT1_CF | blue | na |
| chrUn | 42395670 | 42396344 | 675 SAT1_CF  | blue | na |
| chrUn | 42396364 | 42397100 | 737 SAT1_CF  | blue | na |
| chrUn | 42397118 | 42397786 | 669 SAT1_CF  | blue | na |
| chrUn | 42397799 | 42397916 | 118 SAT1_CF  | blue | na |

|       |          |          |              |      |    |
|-------|----------|----------|--------------|------|----|
| chrUn | 42397969 | 42398469 | 501 SAT1_CF  | blue | na |
| chrUn | 42398494 | 42399166 | 673 SAT1_CF  | blue | na |
| chrUn | 42399184 | 42401132 | 1949 SAT1_CF | blue | na |
| chrUn | 42401219 | 42402501 | 1283 SAT1_CF | blue | na |
| chrUn | 42402520 | 42403065 | 546 SAT1_CF  | blue | na |
| chrUn | 42403108 | 42403648 | 541 SAT1_CF  | blue | na |
| chrUn | 42403666 | 42404219 | 554 SAT1_CF  | blue | na |
| chrUn | 42404262 | 42404847 | 586 SAT1_CF  | blue | na |
| chrUn | 42404859 | 42406456 | 1598 SAT1_CF | blue | na |
| chrUn | 42406468 | 42407802 | 1335 SAT1_CF | blue | na |
| chrUn | 42407846 | 42409182 | 1337 SAT1_CF | blue | na |
| chrUn | 42409250 | 42411175 | 1926 SAT1_CF | blue | na |
| chrUn | 42411232 | 42411817 | 586 SAT1_CF  | blue | na |
| chrUn | 42411847 | 42412357 | 511 SAT1_CF  | blue | na |
| chrUn | 42412385 | 42412541 | 157 SAT1_CF  | blue | na |
| chrUn | 42412586 | 42413087 | 502 SAT1_CF  | blue | na |
| chrUn | 42413099 | 42413826 | 728 SAT1_CF  | blue | na |
| chrUn | 42413846 | 42415048 | 1203 SAT1_CF | blue | na |
| chrUn | 42415092 | 42416053 | 962 SAT1_CF  | blue | na |
| chrUn | 42416073 | 42418143 | 2071 SAT1_CF | blue | na |
| chrUn | 42418154 | 42418508 | 355 SAT1_CF  | blue | na |
| chrUn | 42418595 | 42419095 | 501 SAT1_CF  | blue | na |
| chrUn | 42419108 | 42419215 | 108 SAT1_CF  | blue | na |
| chrUn | 42419237 | 42420333 | 1097 SAT1_CF | blue | na |
| chrUn | 42420376 | 42421338 | 963 SAT1_CF  | blue | na |
| chrUn | 42421417 | 42422377 | 961 SAT1_CF  | blue | na |
| chrUn | 42422436 | 42422917 | 482 SAT1_CF  | blue | na |
| chrUn | 42422944 | 42423729 | 786 SAT1_CF  | blue | na |
| chrUn | 42423752 | 42424297 | 546 SAT1_CF  | blue | na |
| chrUn | 42424364 | 42425128 | 765 SAT1_CF  | blue | na |
| chrUn | 42425141 | 42427078 | 1938 SAT1_CF | blue | na |
| chrUn | 42427112 | 42427632 | 521 SAT1_CF  | blue | na |
| chrUn | 42427644 | 42428317 | 674 SAT1_CF  | blue | na |
| chrUn | 42428356 | 42430786 | 2431 SAT1_CF | blue | na |
| chrUn | 42430874 | 42431458 | 585 SAT1_CF  | blue | na |
| chrUn | 42723233 | 42726253 | 3021 Sat7CF  | lime | na |
| chrUn | 42723629 | 42726873 | 3245 Sat7CF  | lime | na |
| chrUn | 42724245 | 42727460 | 3216 Sat7CF  | lime | na |
| chrUn | 42727628 | 42730851 | 3224 Sat7CF  | lime | na |
| chrUn | 42728237 | 42731472 | 3236 Sat7CF  | lime | na |
| chrUn | 42729162 | 42732540 | 3379 Sat7CF  | lime | na |
| chrUn | 42729779 | 42733151 | 3373 Sat7CF  | lime | na |

|       |          |          |              |      |    |
|-------|----------|----------|--------------|------|----|
| chrUn | 42732086 | 42735434 | 3349 Sat7CF  | lime | na |
| chrUn | 42733758 | 42736977 | 3220 Sat7CF  | lime | na |
| chrUn | 42734373 | 42737595 | 3223 Sat7CF  | lime | na |
| chrUn | 42737446 | 42737628 | 183 Sat7CF   | lime | na |
| chrUn | 42762883 | 42763492 | 610 SAT1_CF  | blue | na |
| chrUn | 42763504 | 42764059 | 556 SAT1_CF  | blue | na |
| chrUn | 42764080 | 42764186 | 107 SAT1_CF  | blue | na |
| chrUn | 42764199 | 42764671 | 473 SAT1_CF  | blue | na |
| chrUn | 42764727 | 42764802 | 76 SAT1_CF   | blue | na |
| chrUn | 42764813 | 42765445 | 633 SAT1_CF  | blue | na |
| chrUn | 42765502 | 42765998 | 497 SAT1_CF  | blue | na |
| chrUn | 42766011 | 42767336 | 1326 SAT1_CF | blue | na |
| chrUn | 42767348 | 42768331 | 984 SAT1_CF  | blue | na |
| chrUn | 42768374 | 42768898 | 525 SAT1_CF  | blue | na |
| chrUn | 42769010 | 42769789 | 780 SAT1_CF  | blue | na |
| chrUn | 42769802 | 42770652 | 851 SAT1_CF  | blue | na |
| chrUn | 42770664 | 42771341 | 678 SAT1_CF  | blue | na |
| chrUn | 42771368 | 42772216 | 849 SAT1_CF  | blue | na |
| chrUn | 42772251 | 42772873 | 623 SAT1_CF  | blue | na |
| chrUn | 42772906 | 42773520 | 615 SAT1_CF  | blue | na |
| chrUn | 42773565 | 42774351 | 787 SAT1_CF  | blue | na |
| chrUn | 42774363 | 42774965 | 603 SAT1_CF  | blue | na |
| chrUn | 42774977 | 42775656 | 680 SAT1_CF  | blue | na |
| chrUn | 42775668 | 42777018 | 1351 SAT1_CF | blue | na |
| chrUn | 42777098 | 42777423 | 326 SAT1_CF  | blue | na |
| chrUn | 42777448 | 42778704 | 1257 SAT1_CF | blue | na |
| chrUn | 42778716 | 42779268 | 553 SAT1_CF  | blue | na |
| chrUn | 42779282 | 42779362 | 81 SAT1_CF   | blue | na |
| chrUn | 42779375 | 42780302 | 928 SAT1_CF  | blue | na |
| chrUn | 42780314 | 42780996 | 683 SAT1_CF  | blue | na |
| chrUn | 42781008 | 42781768 | 761 SAT1_CF  | blue | na |
| chrUn | 42781781 | 42783476 | 1696 SAT1_CF | blue | na |
| chrUn | 42783499 | 42783604 | 106 SAT1_CF  | blue | na |
| chrUn | 42783617 | 42784117 | 501 SAT1_CF  | blue | na |
| chrUn | 42784153 | 42784338 | 186 SAT1_CF  | blue | na |
| chrUn | 42784518 | 42787269 | 2752 SAT1_CF | blue | na |
| chrUn | 42787297 | 42787398 | 102 SAT1_CF  | blue | na |
| chrUn | 42787411 | 42787931 | 521 SAT1_CF  | blue | na |
| chrUn | 42787948 | 42788321 | 374 SAT1_CF  | blue | na |
| chrUn | 42788364 | 42788913 | 550 SAT1_CF  | blue | na |
| chrUn | 42788991 | 42790886 | 1896 SAT1_CF | blue | na |
| chrUn | 42790898 | 42792273 | 1376 SAT1_CF | blue | na |

|       |          |          |              |        |    |
|-------|----------|----------|--------------|--------|----|
| chrUn | 42792286 | 42792805 | 520 SAT1_CF  | blue   | na |
| chrUn | 42792824 | 42793084 | 261 SAT1_CF  | blue   | na |
| chrUn | 42793128 | 42793674 | 547 SAT1_CF  | blue   | na |
| chrUn | 42793806 | 42795116 | 1311 SAT1_CF | blue   | na |
| chrUn | 42795128 | 42795676 | 549 SAT1_CF  | blue   | na |
| chrUn | 42795755 | 42796080 | 326 SAT1_CF  | blue   | na |
| chrUn | 42796105 | 42797438 | 1334 SAT1_CF | blue   | na |
| chrUn | 42797450 | 42797931 | 482 SAT1_CF  | blue   | na |
| chrUn | 42797991 | 42799476 | 1486 SAT1_CF | blue   | na |
| chrUn | 42799490 | 42800030 | 541 SAT1_CF  | blue   | na |
| chrUn | 42800073 | 42800733 | 661 SAT1_CF  | blue   | na |
| chrUn | 42800760 | 42801274 | 515 SAT1_CF  | blue   | na |
| chrUn | 42801314 | 42801716 | 403 SAT1_CF  | blue   | na |
| chrUn | 42801729 | 42802250 | 522 SAT1_CF  | blue   | na |
| chrUn | 42802282 | 42803992 | 1711 SAT1_CF | blue   | na |
| chrUn | 42804014 | 42804166 | 153 SAT1_CF  | blue   | na |
| chrUn | 42804398 | 42805919 | 1522 SAT1_CF | blue   | na |
| chrUn | 42805962 | 42806585 | 624 SAT1_CF  | blue   | na |
| chrUn | 42806596 | 42807264 | 669 SAT1_CF  | blue   | na |
| chrUn | 42807291 | 42807792 | 502 SAT1_CF  | blue   | na |
| chrUn | 42807858 | 42808756 | 899 SAT1_CF  | blue   | na |
| chrUn | 42808817 | 42810041 | 1225 SAT1_CF | blue   | na |
| chrUn | 42810054 | 42810555 | 502 SAT1_CF  | blue   | na |
| chrUn | 42810595 | 42810964 | 370 SAT1_CF  | blue   | na |
| chrUn | 42811081 | 42811604 | 524 SAT1_CF  | blue   | na |
| chrUn | 42811635 | 42811913 | 279 SAT1_CF  | blue   | na |
| chrUn | 42812937 | 42814136 | 1200 CarSat1 | red    | na |
| chrUn | 42814166 | 42814748 | 583 CarSat1  | red    | na |
| chrUn | 42817134 | 42818742 | 1609 CarSat1 | red    | na |
| chrUn | 42819627 | 42823623 | 3997 CarSat1 | red    | na |
| chrUn | 42823653 | 42826361 | 2709 CarSat1 | red    | na |
| chrUn | 42826394 | 42829801 | 3408 CarSat1 | red    | na |
| chrUn | 42829904 | 42834105 | 4202 CarSat1 | red    | na |
| chrUn | 42835650 | 42838589 | 2940 CarSat1 | red    | na |
| chrUn | 42838661 | 42839105 | 445 CarSat1  | red    | na |
| chrUn | 42839135 | 42839196 | 62 CarSat1   | red    | na |
| chrUn | 42839385 | 42840788 | 1404 CarSat1 | red    | na |
| chrUn | 42840818 | 42841923 | 1106 CarSat1 | red    | na |
| chrUn | 42842952 | 42844045 | 1094 CarSat1 | red    | na |
| chrUn | 42844776 | 42845225 | 450 CarSat1  | red    | na |
| chrUn | 42845240 | 42845367 | 128 Carsat2  | orange | na |
| chrUn | 42845255 | 42847946 | 2692 CarSat1 | red    | na |

|       |          |          |      |         |        |    |
|-------|----------|----------|------|---------|--------|----|
| chrUn | 42847972 | 42848987 | 1016 | CarSat1 | red    | na |
| chrUn | 42849731 | 42851220 | 1490 | CarSat1 | red    | na |
| chrUn | 42851254 | 42851441 | 188  | Carsat2 | orange | na |
| chrUn | 42851273 | 42852983 | 1711 | CarSat1 | red    | na |
| chrUn | 42853007 | 42854676 | 1670 | CarSat1 | red    | na |
| chrUn | 42854691 | 42854817 | 127  | Carsat2 | orange | na |
| chrUn | 42854706 | 42855412 | 707  | CarSat1 | red    | na |
| chrUn | 42855442 | 42856415 | 974  | CarSat1 | red    | na |
| chrUn | 42856426 | 42857799 | 1374 | CarSat1 | red    | na |
| chrUn | 42857829 | 42859273 | 1445 | CarSat1 | red    | na |
| chrUn | 42859288 | 42859415 | 128  | Carsat2 | orange | na |
| chrUn | 42859303 | 42860011 | 709  | CarSat1 | red    | na |
| chrUn | 42860041 | 42860527 | 487  | CarSat1 | red    | na |
| chrUn | 42860551 | 42861124 | 574  | CarSat1 | red    | na |
| chrUn | 42861183 | 42862892 | 1710 | CarSat1 | red    | na |
| chrUn | 42862904 | 42863850 | 947  | CarSat1 | red    | na |
| chrUn | 42863880 | 42864441 | 562  | CarSat1 | red    | na |
| chrUn | 42864626 | 42865170 | 545  | CarSat1 | red    | na |
| chrUn | 42865419 | 42865545 | 127  | Carsat2 | orange | na |
| chrUn | 42865434 | 42866405 | 972  | CarSat1 | red    | na |
| chrUn | 42866417 | 42866845 | 429  | CarSat1 | red    | na |
| chrUn | 42869079 | 42870662 | 1584 | CarSat1 | red    | na |
| chrUn | 42891186 | 42891555 | 370  | Sat15CF | na     | na |
| chrUn | 42891186 | 42891555 | 370  | Sat15CF | na     | na |
| chrUn | 42891613 | 42891869 | 257  | Sat15CF | na     | na |
| chrUn | 42891613 | 42891869 | 257  | Sat15CF | na     | na |
| chrUn | 42907948 | 42908402 | 455  | CarSat1 | red    | na |
| chrUn | 42947299 | 42947582 | 284  | SAT1_CF | blue   | na |
| chrUn | 42948992 | 42949562 | 571  | SAT1_CF | blue   | na |
| chrUn | 42949605 | 42950099 | 495  | SAT1_CF | blue   | na |
| chrUn | 42950119 | 42950795 | 677  | SAT1_CF | blue   | na |
| chrUn | 42950839 | 42951630 | 792  | SAT1_CF | blue   | na |
| chrUn | 42951654 | 42952419 | 766  | SAT1_CF | blue   | na |
| chrUn | 42952431 | 42954014 | 1584 | SAT1_CF | blue   | na |
| chrUn | 42954032 | 42954919 | 888  | SAT1_CF | blue   | na |
| chrUn | 42955036 | 42955574 | 539  | SAT1_CF | blue   | na |
| chrUn | 42955594 | 42955701 | 108  | SAT1_CF | blue   | na |
| chrUn | 42955722 | 42956295 | 574  | SAT1_CF | blue   | na |
| chrUn | 42956307 | 42957534 | 1228 | SAT1_CF | blue   | na |
| chrUn | 42957547 | 42957653 | 107  | SAT1_CF | blue   | na |
| chrUn | 42957676 | 42958630 | 955  | SAT1_CF | blue   | na |
| chrUn | 42958670 | 42959168 | 499  | SAT1_CF | blue   | na |

|       |          |          |              |      |    |
|-------|----------|----------|--------------|------|----|
| chrUn | 42959180 | 42960891 | 1712 SAT1_CF | blue | na |
| chrUn | 42960919 | 42961075 | 157 SAT1_CF  | blue | na |
| chrUn | 42961120 | 42961619 | 500 SAT1_CF  | blue | na |
| chrUn | 42961633 | 42962321 | 689 SAT1_CF  | blue | na |
| chrUn | 42962333 | 42963243 | 911 SAT1_CF  | blue | na |
| chrUn | 42963271 | 42964194 | 924 SAT1_CF  | blue | na |
| chrUn | 42964234 | 42965057 | 824 SAT1_CF  | blue | na |
| chrUn | 42965068 | 42965558 | 491 SAT1_CF  | blue | na |
| chrUn | 42965674 | 42966550 | 877 SAT1_CF  | blue | na |
| chrUn | 42966636 | 42967136 | 501 SAT1_CF  | blue | na |
| chrUn | 42967149 | 42968468 | 1320 SAT1_CF | blue | na |
| chrUn | 42968512 | 42969480 | 969 SAT1_CF  | blue | na |
| chrUn | 42969525 | 42969894 | 370 SAT1_CF  | blue | na |
| chrUn | 42969911 | 42970430 | 520 SAT1_CF  | blue | na |
| chrUn | 42970457 | 42972076 | 1620 SAT1_CF | blue | na |
| chrUn | 42972117 | 42972661 | 545 SAT1_CF  | blue | na |
| chrUn | 42972676 | 42973562 | 887 SAT1_CF  | blue | na |
| chrUn | 42973605 | 42973970 | 366 SAT1_CF  | blue | na |
| chrUn | 42974030 | 42974512 | 483 SAT1_CF  | blue | na |
| chrUn | 42974525 | 42975128 | 604 SAT1_CF  | blue | na |
| chrUn | 42975146 | 42975828 | 683 SAT1_CF  | blue | na |
| chrUn | 42975842 | 42976908 | 1067 SAT1_CF | blue | na |
| chrUn | 42976987 | 42977949 | 963 SAT1_CF  | blue | na |
| chrUn | 42977987 | 42979358 | 1372 SAT1_CF | blue | na |
| chrUn | 42979376 | 42980045 | 670 SAT1_CF  | blue | na |
| chrUn | 42980057 | 42980222 | 166 SAT1_CF  | blue | na |
| chrUn | 42980272 | 42980815 | 544 SAT1_CF  | blue | na |
| chrUn | 42980858 | 42981384 | 527 SAT1_CF  | blue | na |
| chrUn | 42981427 | 42981970 | 544 SAT1_CF  | blue | na |
| chrUn | 42981982 | 42982655 | 674 SAT1_CF  | blue | na |
| chrUn | 42982725 | 42983198 | 474 SAT1_CF  | blue | na |
| chrUn | 42983210 | 42983876 | 667 SAT1_CF  | blue | na |
| chrUn | 42983919 | 42984637 | 719 SAT1_CF  | blue | na |
| chrUn | 42984676 | 42985239 | 564 SAT1_CF  | blue | na |
| chrUn | 42985252 | 42987587 | 2336 SAT1_CF | blue | na |
| chrUn | 42987600 | 42987998 | 399 SAT1_CF  | blue | na |
| chrUn | 42988023 | 42988537 | 515 SAT1_CF  | blue | na |
| chrUn | 42988566 | 42991310 | 2745 SAT1_CF | blue | na |
| chrUn | 42991321 | 42991806 | 486 SAT1_CF  | blue | na |
| chrUn | 42991826 | 42993191 | 1366 SAT1_CF | blue | na |
| chrUn | 42993291 | 42994413 | 1123 SAT1_CF | blue | na |
| chrUn | 42994424 | 42995710 | 1287 SAT1_CF | blue | na |



|       |          |          |              |        |    |
|-------|----------|----------|--------------|--------|----|
| chrUn | 43124416 | 43125300 | 885 SAT1_CF  | blue   | na |
| chrUn | 43159559 | 43160232 | 674 Sat29CF  | na     | na |
| chrUn | 43160020 | 43160258 | 239 Sat29CF  | na     | na |
| chrUn | 43228275 | 43229433 | 1159 Sat2CF  | purple | na |
| chrUn | 43247482 | 43248648 | 1167 Sat2CF  | purple | na |
| chrUn | 43274152 | 43274706 | 555 SAT1_CF  | blue   | na |
| chrUn | 43274793 | 43275148 | 356 SAT1_CF  | blue   | na |
| chrUn | 43275161 | 43275705 | 545 SAT1_CF  | blue   | na |
| chrUn | 43275749 | 43276592 | 844 SAT1_CF  | blue   | na |
| chrUn | 43276612 | 43278155 | 1544 SAT1_CF | blue   | na |
| chrUn | 43278168 | 43278670 | 503 SAT1_CF  | blue   | na |
| chrUn | 43278710 | 43279112 | 403 SAT1_CF  | blue   | na |
| chrUn | 43279125 | 43279632 | 508 SAT1_CF  | blue   | na |
| chrUn | 43279717 | 43280489 | 773 SAT1_CF  | blue   | na |
| chrUn | 43280531 | 43281391 | 861 SAT1_CF  | blue   | na |
| chrUn | 43281404 | 43281962 | 559 SAT1_CF  | blue   | na |
| chrUn | 43281982 | 43282090 | 109 SAT1_CF  | blue   | na |
| chrUn | 43282103 | 43282623 | 521 SAT1_CF  | blue   | na |
| chrUn | 43282648 | 43282804 | 157 SAT1_CF  | blue   | na |
| chrUn | 43283017 | 43284170 | 1154 SAT1_CF | blue   | na |
| chrUn | 43284183 | 43285221 | 1039 SAT1_CF | blue   | na |
| chrUn | 43285264 | 43285938 | 675 SAT1_CF  | blue   | na |
| chrUn | 43285950 | 43286708 | 759 SAT1_CF  | blue   | na |
| chrUn | 43286721 | 43287223 | 503 SAT1_CF  | blue   | na |
| chrUn | 43287266 | 43287447 | 182 SAT1_CF  | blue   | na |
| chrUn | 43287494 | 43288039 | 546 SAT1_CF  | blue   | na |
| chrUn | 43288118 | 43288621 | 504 SAT1_CF  | blue   | na |
| chrUn | 43289331 | 43290195 | 865 SAT1_CF  | blue   | na |
| chrUn | 43290251 | 43290624 | 374 SAT1_CF  | blue   | na |
| chrUn | 43290669 | 43291341 | 673 SAT1_CF  | blue   | na |
| chrUn | 43291353 | 43292038 | 686 SAT1_CF  | blue   | na |
| chrUn | 43292049 | 43292551 | 503 SAT1_CF  | blue   | na |
| chrUn | 43292597 | 43294004 | 1408 SAT1_CF | blue   | na |
| chrUn | 43294046 | 43294902 | 857 SAT1_CF  | blue   | na |
| chrUn | 43294914 | 43295929 | 1016 SAT1_CF | blue   | na |
| chrUn | 43295952 | 43296025 | 74 SAT1_CF   | blue   | na |
| chrUn | 43296036 | 43296538 | 503 SAT1_CF  | blue   | na |
| chrUn | 43296584 | 43296758 | 175 SAT1_CF  | blue   | na |
| chrUn | 43296940 | 43297176 | 237 SAT1_CF  | blue   | na |
| chrUn | 43298971 | 43300277 | 1307 SAT1_CF | blue   | na |
| chrUn | 43300306 | 43301373 | 1068 SAT1_CF | blue   | na |
| chrUn | 43301495 | 43302863 | 1369 SAT1_CF | blue   | na |

|       |          |          |              |      |    |
|-------|----------|----------|--------------|------|----|
| chrUn | 43302885 | 43304854 | 1970 SAT1_CF | blue | na |
| chrUn | 43304877 | 43304982 | 106 SAT1_CF  | blue | na |
| chrUn | 43304995 | 43305573 | 579 SAT1_CF  | blue | na |
| chrUn | 43305653 | 43306262 | 610 SAT1_CF  | blue | na |
| chrUn | 43306282 | 43307440 | 1159 SAT1_CF | blue | na |
| chrUn | 43307452 | 43308083 | 632 SAT1_CF  | blue | na |
| chrUn | 43308106 | 43308309 | 204 SAT1_CF  | blue | na |
| chrUn | 43310985 | 43311716 | 732 SAT1_CF  | blue | na |
| chrUn | 43311739 | 43311844 | 106 SAT1_CF  | blue | na |
| chrUn | 43311857 | 43312337 | 481 SAT1_CF  | blue | na |
| chrUn | 43312370 | 43312876 | 507 SAT1_CF  | blue | na |
| chrUn | 43314049 | 43315386 | 1338 SAT1_CF | blue | na |
| chrUn | 43315399 | 43316103 | 705 SAT1_CF  | blue | na |
| chrUn | 43316168 | 43316715 | 548 SAT1_CF  | blue | na |
| chrUn | 43316775 | 43316953 | 179 SAT1_CF  | blue | na |
| chrUn | 43316995 | 43317539 | 545 SAT1_CF  | blue | na |
| chrUn | 43317582 | 43318259 | 678 SAT1_CF  | blue | na |
| chrUn | 43318271 | 43318896 | 626 SAT1_CF  | blue | na |
| chrUn | 43318909 | 43319430 | 522 SAT1_CF  | blue | na |
| chrUn | 43319447 | 43319820 | 374 SAT1_CF  | blue | na |
| chrUn | 43319863 | 43320387 | 525 SAT1_CF  | blue | na |
| chrUn | 43320400 | 43320484 | 85 SAT1_CF   | blue | na |
| chrUn | 43320528 | 43321650 | 1123 SAT1_CF | blue | na |
| chrUn | 43321663 | 43322687 | 1025 SAT1_CF | blue | na |
| chrUn | 43322757 | 43324365 | 1609 SAT1_CF | blue | na |
| chrUn | 43324377 | 43324821 | 445 SAT1_CF  | blue | na |
| chrUn | 43324844 | 43324915 | 72 SAT1_CF   | blue | na |
| chrUn | 43324928 | 43325689 | 762 SAT1_CF  | blue | na |
| chrUn | 43325709 | 43326501 | 793 SAT1_CF  | blue | na |
| chrUn | 43327530 | 43328138 | 609 SAT1_CF  | blue | na |
| chrUn | 43328159 | 43328704 | 546 SAT1_CF  | blue | na |
| chrUn | 43328722 | 43330215 | 1494 SAT1_CF | blue | na |
| chrUn | 43330258 | 43330933 | 676 SAT1_CF  | blue | na |
| chrUn | 43330945 | 43331639 | 695 SAT1_CF  | blue | na |
| chrUn | 43331666 | 43332176 | 511 SAT1_CF  | blue | na |
| chrUn | 43332219 | 43332763 | 545 SAT1_CF  | blue | na |
| chrUn | 43332805 | 43332977 | 173 SAT1_CF  | blue | na |
| chrUn | 43332990 | 43333536 | 547 SAT1_CF  | blue | na |
| chrUn | 43333556 | 43333665 | 110 SAT1_CF  | blue | na |
| chrUn | 43333677 | 43334232 | 556 SAT1_CF  | blue | na |
| chrUn | 43334255 | 43334363 | 109 SAT1_CF  | blue | na |
| chrUn | 43334375 | 43334893 | 519 SAT1_CF  | blue | na |

|       |          |          |              |        |    |
|-------|----------|----------|--------------|--------|----|
| chrUn | 43334939 | 43337204 | 2266 SAT1_CF | blue   | na |
| chrUn | 43337244 | 43338611 | 1368 SAT1_CF | blue   | na |
| chrUn | 43338626 | 43339166 | 541 SAT1_CF  | blue   | na |
| chrUn | 43339208 | 43341603 | 2396 SAT1_CF | blue   | na |
| chrUn | 43341631 | 43342262 | 632 SAT1_CF  | blue   | na |
| chrUn | 43342305 | 43342850 | 546 SAT1_CF  | blue   | na |
| chrUn | 43342870 | 43342979 | 110 SAT1_CF  | blue   | na |
| chrUn | 43342991 | 43344589 | 1599 SAT1_CF | blue   | na |
| chrUn | 43344601 | 43345568 | 968 SAT1_CF  | blue   | na |
| chrUn | 43345612 | 43346155 | 544 SAT1_CF  | blue   | na |
| chrUn | 43346197 | 43348193 | 1997 SAT1_CF | blue   | na |
| chrUn | 43348206 | 43348707 | 502 SAT1_CF  | blue   | na |
| chrUn | 43348760 | 43349682 | 923 SAT1_CF  | blue   | na |
| chrUn | 43349699 | 43350741 | 1043 SAT1_CF | blue   | na |
| chrUn | 43350762 | 43352507 | 1746 SAT1_CF | blue   | na |
| chrUn | 43352553 | 43353188 | 636 SAT1_CF  | blue   | na |
| chrUn | 43353200 | 43353753 | 554 SAT1_CF  | blue   | na |
| chrUn | 43353796 | 43354451 | 656 SAT1_CF  | blue   | na |
| chrUn | 43354475 | 43355155 | 681 SAT1_CF  | blue   | na |
| chrUn | 43355168 | 43355670 | 503 SAT1_CF  | blue   | na |
| chrUn | 43355710 | 43356667 | 958 SAT1_CF  | blue   | na |
| chrUn | 43356746 | 43358116 | 1371 SAT1_CF | blue   | na |
| chrUn | 43358127 | 43359602 | 1476 SAT1_CF | blue   | na |
| chrUn | 43359643 | 43360356 | 714 SAT1_CF  | blue   | na |
| chrUn | 43360368 | 43360869 | 502 SAT1_CF  | blue   | na |
| chrUn | 43360922 | 43361867 | 946 SAT1_CF  | blue   | na |
| chrUn | 43361946 | 43362906 | 961 SAT1_CF  | blue   | na |
| chrUn | 43362949 | 43363752 | 804 SAT1_CF  | blue   | na |
| chrUn | 43363766 | 43364463 | 698 SAT1_CF  | blue   | na |
| chrUn | 43364505 | 43365050 | 546 SAT1_CF  | blue   | na |
| chrUn | 43365093 | 43365776 | 684 SAT1_CF  | blue   | na |
| chrUn | 43365788 | 43366998 | 1211 SAT1_CF | blue   | na |
| chrUn | 43367024 | 43367543 | 520 SAT1_CF  | blue   | na |
| chrUn | 43367590 | 43367726 | 137 SAT1_CF  | blue   | na |
| chrUn | 43367741 | 43368262 | 522 SAT1_CF  | blue   | na |
| chrUn | 43368331 | 43369063 | 733 SAT1_CF  | blue   | na |
| chrUn | 43369076 | 43371379 | 2304 SAT1_CF | blue   | na |
| chrUn | 43371397 | 43371878 | 482 SAT1_CF  | blue   | na |
| chrUn | 43371945 | 43372464 | 520 SAT1_CF  | blue   | na |
| chrUn | 43372497 | 43373043 | 547 SAT1_CF  | blue   | na |
| chrUn | 43373057 | 43374198 | 1142 SAT1_CF | blue   | na |
| chrUn | 43504477 | 43504879 | 403 Sat2CF   | purple | na |

|       |          |          |              |        |    |
|-------|----------|----------|--------------|--------|----|
| chrUn | 43504557 | 43505122 | 566 Sat2CF   | purple | na |
| chrUn | 43504972 | 43505140 | 169 Sat2CF   | purple | na |
| chrUn | 43509804 | 43510119 | 316 SAT1_CF  | blue   | na |
| chrUn | 43526198 | 43527681 | 1484 CarSat1 | red    | na |
| chrUn | 43527709 | 43528476 | 768 CarSat1  | red    | na |
| chrUn | 43546005 | 43546850 | 846 Sat2CF   | purple | na |
| chrUn | 43546113 | 43546836 | 724 Sat2CF   | purple | na |
| chrUn | 43561688 | 43561934 | 247 Sat2CF   | purple | na |
| chrUn | 43561724 | 43561940 | 217 Sat2CF   | purple | na |
| chrUn | 43597756 | 43598136 | 381 CarSat1  | red    | na |
| chrUn | 43599104 | 43599957 | 854 CarSat1  | red    | na |
| chrUn | 43599978 | 43600869 | 892 CarSat1  | red    | na |
| chrUn | 43726018 | 43726262 | 245 CarSat1  | red    | na |
| chrUn | 43726291 | 43726598 | 308 CarSat1  | red    | na |
| chrUn | 43726619 | 43728208 | 1590 CarSat1 | red    | na |
| chrUn | 43728229 | 43730569 | 2341 CarSat1 | red    | na |
| chrUn | 43730590 | 43732566 | 1977 CarSat1 | red    | na |
| chrUn | 43732569 | 43734045 | 1477 SAT1_CF | blue   | na |
| chrUn | 43736724 | 43736954 | 231 SAT1_CF  | blue   | na |
| chrUn | 43737023 | 43740598 | 3576 SAT1_CF | blue   | na |
| chrUn | 43740616 | 43741287 | 672 SAT1_CF  | blue   | na |
| chrUn | 43741330 | 43741809 | 480 SAT1_CF  | blue   | na |
| chrUn | 43741843 | 43742371 | 529 SAT1_CF  | blue   | na |
| chrUn | 43742391 | 43743038 | 648 SAT1_CF  | blue   | na |
| chrUn | 43743080 | 43744065 | 986 SAT1_CF  | blue   | na |
| chrUn | 43744077 | 43744742 | 666 SAT1_CF  | blue   | na |
| chrUn | 43744753 | 43746238 | 1486 SAT1_CF | blue   | na |
| chrUn | 43746279 | 43747282 | 1004 SAT1_CF | blue   | na |
| chrUn | 43747309 | 43747815 | 507 SAT1_CF  | blue   | na |
| chrUn | 43747887 | 43749025 | 1139 SAT1_CF | blue   | na |
| chrUn | 43749011 | 43749724 | 714 CarSat1  | red    | na |
| chrUn | 43749743 | 43750180 | 438 CarSat1  | red    | na |
| chrUn | 43770166 | 43771393 | 1228 Sat2CF  | purple | na |
| chrUn | 43810807 | 43811628 | 822 Sat2CF   | purple | na |
| chrUn | 43810881 | 43811606 | 726 Sat2CF   | purple | na |
| chrUn | 43811498 | 43811665 | 168 Sat2CF   | purple | na |
| chrUn | 43833894 | 43834245 | 352 Sat2CF   | purple | na |
| chrUn | 43833921 | 43834311 | 391 Sat2CF   | purple | na |
| chrUn | 43846306 | 43846483 | 178 Sat2CF   | purple | na |
| chrUn | 43846325 | 43847432 | 1108 Sat2CF  | purple | na |
| chrUn | 43884378 | 43884875 | 498 Sat11CF  | na     | na |
| chrUn | 43884516 | 43884875 | 360 Sat11CF  | na     | na |

|       |          |          |              |        |    |
|-------|----------|----------|--------------|--------|----|
| chrUn | 43885110 | 43885280 | 171 Sat11CF  | na     | na |
| chrUn | 43943777 | 43944244 | 468 Sat11CF  | na     | na |
| chrUn | 43943914 | 43944244 | 331 Sat11CF  | na     | na |
| chrUn | 43994465 | 43995418 | 954 Sat7CF   | lime   | na |
| chrUn | 43994465 | 43995418 | 954 Sat7CF   | lime   | na |
| chrUn | 44202465 | 44202588 | 124 Sat2CF   | purple | na |
| chrUn | 44202496 | 44203157 | 662 Sat2CF   | purple | na |
| chrUn | 44214480 | 44214950 | 471 Sat2CF   | purple | na |
| chrUn | 44214532 | 44215016 | 485 Sat2CF   | purple | na |
| chrUn | 44236514 | 44237435 | 922 Sat2CF   | purple | na |
| chrUn | 44236577 | 44237389 | 813 Sat2CF   | purple | na |
| chrUn | 44263390 | 44264639 | 1250 Sat2CF  | purple | na |
| chrUn | 44266312 | 44266725 | 414 CarSat1  | red    | na |
| chrUn | 44267533 | 44267675 | 143 CarSat1  | red    | na |
| chrUn | 44267722 | 44268547 | 826 CarSat1  | red    | na |
| chrUn | 44268568 | 44270162 | 1595 CarSat1 | red    | na |
| chrUn | 44270183 | 44271036 | 854 CarSat1  | red    | na |
| chrUn | 44271057 | 44272047 | 991 CarSat1  | red    | na |
| chrUn | 44307102 | 44307381 | 280 Sat15CF  | na     | na |
| chrUn | 44307491 | 44307819 | 329 Sat15CF  | na     | na |
| chrUn | 44318219 | 44318475 | 257 Sat15CF  | na     | na |
| chrUn | 44318219 | 44318475 | 257 Sat15CF  | na     | na |
| chrUn | 44318537 | 44318906 | 370 Sat15CF  | na     | na |
| chrUn | 44462357 | 44463244 | 888 CarSat1  | red    | na |
| chrUn | 44463259 | 44463385 | 127 Carsat2  | orange | na |
| chrUn | 44463274 | 44463759 | 486 CarSat1  | red    | na |
| chrUn | 44463792 | 44465786 | 1995 CarSat1 | red    | na |
| chrUn | 44465808 | 44466511 | 704 CarSat1  | red    | na |
| chrUn | 44474528 | 44474955 | 428 CarSat1  | red    | na |
| chrUn | 44475154 | 44475288 | 135 CarSat1  | red    | na |
| chrUn | 44475326 | 44476812 | 1487 CarSat1 | red    | na |
| chrUn | 44506873 | 44506977 | 105 SAT1_CF  | blue   | na |
| chrUn | 44511657 | 44512334 | 678 Sat2CF   | purple | na |
| chrUn | 44512255 | 44512344 | 90 Sat2CF    | purple | na |
| chrUn | 44681461 | 44681536 | 76 Sat15CF   | na     | na |
| chrUn | 44796650 | 44797726 | 1077 Sat2CF  | purple | na |
| chrUn | 44816193 | 44816419 | 227 Sat2CF   | purple | na |
| chrUn | 44816222 | 44816419 | 198 Sat2CF   | purple | na |
| chrUn | 44831620 | 44832323 | 704 CarSat1  | red    | na |
| chrUn | 44832345 | 44834314 | 1970 CarSat1 | red    | na |
| chrUn | 44834316 | 44834751 | 436 SAT1_CF  | blue   | na |
| chrUn | 44835751 | 44836362 | 612 SAT1_CF  | blue   | na |

|       |          |          |      |         |        |    |
|-------|----------|----------|------|---------|--------|----|
| chrUn | 44836404 | 44837775 | 1372 | SAT1_CF | blue   | na |
| chrUn | 44837788 | 44838670 | 883  | SAT1_CF | blue   | na |
| chrUn | 44838693 | 44839373 | 681  | SAT1_CF | blue   | na |
| chrUn | 44839393 | 44839887 | 495  | SAT1_CF | blue   | na |
| chrUn | 44839974 | 44840456 | 483  | SAT1_CF | blue   | na |
| chrUn | 44840488 | 44841103 | 616  | CarSat1 | red    | na |
| chrUn | 44841118 | 44841244 | 127  | Carsat2 | orange | na |
| chrUn | 44841133 | 44844561 | 3429 | CarSat1 | red    | na |
| chrUn | 44844594 | 44846257 | 1664 | CarSat1 | red    | na |
| chrUn | 44846287 | 44848252 | 1966 | CarSat1 | red    | na |
| chrUn | 44848277 | 44849204 | 928  | CarSat1 | red    | na |
| chrUn | 44849234 | 44849945 | 712  | CarSat1 | red    | na |
| chrUn | 44849975 | 44850801 | 827  | CarSat1 | red    | na |
| chrUn | 44851975 | 44852553 | 579  | CarSat1 | red    | na |
| chrUn | 44852583 | 44853295 | 713  | CarSat1 | red    | na |
| chrUn | 44853325 | 44854773 | 1449 | CarSat1 | red    | na |
| chrUn | 44854803 | 44856769 | 1967 | CarSat1 | red    | na |
| chrUn | 44856793 | 44857733 | 941  | CarSat1 | red    | na |
| chrUn | 44857748 | 44857874 | 127  | Carsat2 | orange | na |
| chrUn | 44857763 | 44858470 | 708  | CarSat1 | red    | na |
| chrUn | 44858485 | 44858611 | 127  | Carsat2 | orange | na |
| chrUn | 44858500 | 44859207 | 708  | CarSat1 | red    | na |
| chrUn | 44859237 | 44859944 | 708  | CarSat1 | red    | na |
| chrUn | 44859959 | 44860085 | 127  | Carsat2 | orange | na |
| chrUn | 44859974 | 44862153 | 2180 | CarSat1 | red    | na |
| chrUn | 44862183 | 44862668 | 486  | CarSat1 | red    | na |
| chrUn | 44862692 | 44863634 | 943  | CarSat1 | red    | na |
| chrUn | 44863664 | 44865625 | 1962 | CarSat1 | red    | na |
| chrUn | 44865649 | 44867107 | 1459 | CarSat1 | red    | na |
| chrUn | 44867129 | 44868584 | 1456 | CarSat1 | red    | na |
| chrUn | 44868608 | 44870286 | 1679 | CarSat1 | red    | na |
| chrUn | 44870316 | 44872500 | 2185 | CarSat1 | red    | na |
| chrUn | 44872515 | 44872642 | 128  | Carsat2 | orange | na |
| chrUn | 44872530 | 44873016 | 487  | CarSat1 | red    | na |
| chrUn | 44873040 | 44873976 | 937  | CarSat1 | red    | na |
| chrUn | 44874006 | 44876195 | 2190 | CarSat1 | red    | na |
| chrUn | 44876210 | 44876337 | 128  | Carsat2 | orange | na |
| chrUn | 44876225 | 44876710 | 486  | CarSat1 | red    | na |
| chrUn | 44876734 | 44878197 | 1464 | CarSat1 | red    | na |
| chrUn | 44878213 | 44879146 | 934  | CarSat1 | red    | na |
| chrUn | 44879161 | 44879287 | 127  | Carsat2 | orange | na |
| chrUn | 44879176 | 44880030 | 855  | CarSat1 | red    | na |

|       |          |          |              |      |    |
|-------|----------|----------|--------------|------|----|
| chrUn | 44942469 | 44943466 | 998 SAT1_CF  | blue | na |
| chrUn | 44943479 | 44943979 | 501 SAT1_CF  | blue | na |
| chrUn | 44944016 | 44944278 | 263 SAT1_CF  | blue | na |
| chrUn | 44944322 | 44944869 | 548 SAT1_CF  | blue | na |
| chrUn | 44944912 | 44945474 | 563 SAT1_CF  | blue | na |
| chrUn | 44945497 | 44945603 | 107 SAT1_CF  | blue | na |
| chrUn | 44945616 | 44946140 | 525 SAT1_CF  | blue | na |
| chrUn | 44946166 | 44946323 | 158 SAT1_CF  | blue | na |
| chrUn | 44946535 | 44947742 | 1208 SAT1_CF | blue | na |
| chrUn | 44947770 | 44949685 | 1916 SAT1_CF | blue | na |
| chrUn | 44949699 | 44949868 | 170 SAT1_CF  | blue | na |
| chrUn | 44949883 | 44951208 | 1326 SAT1_CF | blue | na |
| chrUn | 44951231 | 44951723 | 493 SAT1_CF  | blue | na |
| chrUn | 44951768 | 44951923 | 156 SAT1_CF  | blue | na |
| chrUn | 44952151 | 44952656 | 506 SAT1_CF  | blue | na |
| chrUn | 44952699 | 44953229 | 531 SAT1_CF  | blue | na |
| chrUn | 44953256 | 44953889 | 634 SAT1_CF  | blue | na |
| chrUn | 44953932 | 44955304 | 1373 SAT1_CF | blue | na |
| chrUn | 44955317 | 44955818 | 502 SAT1_CF  | blue | na |
| chrUn | 44955861 | 44958481 | 2621 SAT1_CF | blue | na |
| chrUn | 44958587 | 44958941 | 355 SAT1_CF  | blue | na |
| chrUn | 44958956 | 44961295 | 2340 SAT1_CF | blue | na |
| chrUn | 44961307 | 44963330 | 2024 SAT1_CF | blue | na |
| chrUn | 44963409 | 44963769 | 361 SAT1_CF  | blue | na |
| chrUn | 44963794 | 44964336 | 543 SAT1_CF  | blue | na |
| chrUn | 44964433 | 44965110 | 678 SAT1_CF  | blue | na |
| chrUn | 44965122 | 44965806 | 685 SAT1_CF  | blue | na |
| chrUn | 44965819 | 44966320 | 502 SAT1_CF  | blue | na |
| chrUn | 44966373 | 44967256 | 884 SAT1_CF  | blue | na |
| chrUn | 44967288 | 44967624 | 337 SAT1_CF  | blue | na |
| chrUn | 44967672 | 44969005 | 1334 SAT1_CF | blue | na |
| chrUn | 44969018 | 44969520 | 503 SAT1_CF  | blue | na |
| chrUn | 44969565 | 44969672 | 108 SAT1_CF  | blue | na |
| chrUn | 44969735 | 44970261 | 527 SAT1_CF  | blue | na |
| chrUn | 44970279 | 44971070 | 792 SAT1_CF  | blue | na |
| chrUn | 44971082 | 44971633 | 552 SAT1_CF  | blue | na |
| chrUn | 44971651 | 44971727 | 77 SAT1_CF   | blue | na |
| chrUn | 44971740 | 44972011 | 272 SAT1_CF  | blue | na |
| chrUn | 44972069 | 44973153 | 1085 SAT1_CF | blue | na |
| chrUn | 44973165 | 44974236 | 1072 SAT1_CF | blue | na |
| chrUn | 44974250 | 44975942 | 1693 SAT1_CF | blue | na |
| chrUn | 44975965 | 44976070 | 106 SAT1_CF  | blue | na |

|       |          |          |              |        |    |
|-------|----------|----------|--------------|--------|----|
| chrUn | 44976083 | 44976783 | 701 SAT1_CF  | blue   | na |
| chrUn | 44977045 | 44977367 | 323 SAT1_CF  | blue   | na |
| chrUn | 44977414 | 44977956 | 543 SAT1_CF  | blue   | na |
| chrUn | 44978000 | 44978676 | 677 SAT1_CF  | blue   | na |
| chrUn | 44978690 | 44979367 | 678 SAT1_CF  | blue   | na |
| chrUn | 44979379 | 44980061 | 683 SAT1_CF  | blue   | na |
| chrUn | 44980074 | 44980773 | 700 SAT1_CF  | blue   | na |
| chrUn | 44980801 | 44982437 | 1637 SAT1_CF | blue   | na |
| chrUn | 44982506 | 44983350 | 845 SAT1_CF  | blue   | na |
| chrUn | 44983363 | 44984642 | 1280 SAT1_CF | blue   | na |
| chrUn | 44984667 | 44985269 | 603 SAT1_CF  | blue   | na |
| chrUn | 44986274 | 44986832 | 559 CarSat1  | red    | na |
| chrUn | 44986857 | 44987493 | 637 CarSat1  | red    | na |
| chrUn | 45020444 | 45022212 | 1769 CarSat1 | red    | na |
| chrUn | 45022228 | 45023191 | 964 CarSat1  | red    | na |
| chrUn | 45023218 | 45023930 | 713 CarSat1  | red    | na |
| chrUn | 45023957 | 45025281 | 1325 CarSat1 | red    | na |
| chrUn | 45025308 | 45026155 | 848 CarSat1  | red    | na |
| chrUn | 45026194 | 45027157 | 964 CarSat1  | red    | na |
| chrUn | 45027173 | 45028135 | 963 CarSat1  | red    | na |
| chrUn | 45028162 | 45028871 | 710 CarSat1  | red    | na |
| chrUn | 45028898 | 45029810 | 913 CarSat1  | red    | na |
| chrUn | 45031610 | 45032796 | 1187 CarSat1 | red    | na |
| chrUn | 45043854 | 45044570 | 717 Sat2CF   | purple | na |
| chrUn | 45043931 | 45044638 | 708 Sat2CF   | purple | na |
| chrUn | 45091704 | 45092653 | 950 CarSat1  | red    | na |
| chrUn | 45092802 | 45093523 | 722 CarSat1  | red    | na |
| chrUn | 45093550 | 45094019 | 470 CarSat1  | red    | na |
| chrUn | 45094204 | 45094552 | 349 CarSat1  | red    | na |
| chrUn | 45094765 | 45095414 | 650 CarSat1  | red    | na |
| chrUn | 45095518 | 45096366 | 849 CarSat1  | red    | na |
| chrUn | 45096387 | 45097172 | 786 CarSat1  | red    | na |
| chrUn | 45097384 | 45098032 | 649 CarSat1  | red    | na |
| chrUn | 45098050 | 45098523 | 474 CarSat1  | red    | na |
| chrUn | 45098540 | 45099980 | 1441 CarSat1 | red    | na |
| chrUn | 45099983 | 45100369 | 387 SAT1_CF  | blue   | na |
| chrUn | 45100380 | 45105339 | 4960 SAT1_CF | blue   | na |
| chrUn | 45105358 | 45105881 | 524 SAT1_CF  | blue   | na |
| chrUn | 45105908 | 45106644 | 737 SAT1_CF  | blue   | na |
| chrUn | 45106661 | 45108201 | 1541 SAT1_CF | blue   | na |
| chrUn | 45108254 | 45108364 | 111 SAT1_CF  | blue   | na |
| chrUn | 45108393 | 45109132 | 740 SAT1_CF  | blue   | na |



|       |          |          |      |         |      |    |
|-------|----------|----------|------|---------|------|----|
| chrUn | 45109127 | 45109851 | 725  | CarSat1 | red  | na |
| chrUn | 45110000 | 45111461 | 1462 | CarSat1 | red  | na |
| chrUn | 45111479 | 45113451 | 1973 | CarSat1 | red  | na |
| chrUn | 45113442 | 45114538 | 1097 | SAT1_CF | blue | na |
| chrUn | 45114550 | 45115954 | 1405 | SAT1_CF | blue | na |
| chrUn | 45115997 | 45117389 | 1393 | SAT1_CF | blue | na |
| chrUn | 45117409 | 45118561 | 1153 | SAT1_CF | blue | na |
| chrUn | 45118556 | 45119274 | 719  | CarSat1 | red  | na |
| chrUn | 45119432 | 45119715 | 284  | CarSat1 | red  | na |
| chrUn | 45121459 | 45122023 | 565  | SAT1_CF | blue | na |
| chrUn | 45122095 | 45122767 | 673  | SAT1_CF | blue | na |
| chrUn | 45122779 | 45123461 | 683  | SAT1_CF | blue | na |
| chrUn | 45123474 | 45123956 | 483  | SAT1_CF | blue | na |
| chrUn | 45124032 | 45124407 | 376  | SAT1_CF | blue | na |
| chrUn | 45124418 | 45126040 | 1623 | SAT1_CF | blue | na |
| chrUn | 45126083 | 45126913 | 831  | SAT1_CF | blue | na |
| chrUn | 45127254 | 45128936 | 1683 | SAT1_CF | blue | na |
| chrUn | 45128956 | 45129094 | 139  | SAT1_CF | blue | na |
| chrUn | 45131061 | 45131831 | 771  | SAT1_CF | blue | na |
| chrUn | 45131845 | 45132346 | 502  | SAT1_CF | blue | na |
| chrUn | 45133346 | 45134023 | 678  | SAT1_CF | blue | na |
| chrUn | 45134035 | 45134709 | 675  | SAT1_CF | blue | na |
| chrUn | 45134731 | 45135208 | 478  | SAT1_CF | blue | na |
| chrUn | 45135315 | 45135830 | 516  | SAT1_CF | blue | na |
| chrUn | 45136533 | 45137117 | 585  | SAT1_CF | blue | na |
| chrUn | 45137159 | 45137888 | 730  | SAT1_CF | blue | na |
| chrUn | 45137958 | 45139326 | 1369 | SAT1_CF | blue | na |
| chrUn | 45139369 | 45141026 | 1658 | SAT1_CF | blue | na |
| chrUn | 45141039 | 45143898 | 2860 | SAT1_CF | blue | na |
| chrUn | 45143910 | 45144578 | 669  | SAT1_CF | blue | na |
| chrUn | 45144590 | 45146551 | 1962 | SAT1_CF | blue | na |
| chrUn | 45146595 | 45147807 | 1213 | SAT1_CF | blue | na |
| chrUn | 45147828 | 45148450 | 623  | SAT1_CF | blue | na |
| chrUn | 45148536 | 45149037 | 502  | SAT1_CF | blue | na |
| chrUn | 45149086 | 45149625 | 540  | SAT1_CF | blue | na |
| chrUn | 45149674 | 45150345 | 672  | SAT1_CF | blue | na |
| chrUn | 45150357 | 45151038 | 682  | SAT1_CF | blue | na |
| chrUn | 45151050 | 45151681 | 632  | SAT1_CF | blue | na |
| chrUn | 45151736 | 45154787 | 3052 | SAT1_CF | blue | na |
| chrUn | 45154800 | 45155354 | 555  | SAT1_CF | blue | na |
| chrUn | 45155424 | 45156030 | 607  | SAT1_CF | blue | na |
| chrUn | 45156041 | 45156929 | 889  | SAT1_CF | blue | na |

|       |          |          |              |        |    |
|-------|----------|----------|--------------|--------|----|
| chrUn | 45156944 | 45157135 | 192 SAT1_CF  | blue   | na |
| chrUn | 45157268 | 45157806 | 539 SAT1_CF  | blue   | na |
| chrUn | 45157854 | 45159072 | 1219 SAT1_CF | blue   | na |
| chrUn | 45159093 | 45160948 | 1856 SAT1_CF | blue   | na |
| chrUn | 45160990 | 45162214 | 1225 SAT1_CF | blue   | na |
| chrUn | 45162226 | 45162834 | 609 SAT1_CF  | blue   | na |
| chrUn | 45162846 | 45163401 | 556 SAT1_CF  | blue   | na |
| chrUn | 45163424 | 45163532 | 109 SAT1_CF  | blue   | na |
| chrUn | 45163544 | 45164064 | 521 SAT1_CF  | blue   | na |
| chrUn | 45164090 | 45165245 | 1156 SAT1_CF | blue   | na |
| chrUn | 45165273 | 45165903 | 631 SAT1_CF  | blue   | na |
| chrUn | 45165946 | 45166491 | 546 SAT1_CF  | blue   | na |
| chrUn | 45166513 | 45167399 | 887 SAT1_CF  | blue   | na |
| chrUn | 45224796 | 45225006 | 211 Sat2CF   | purple | na |
| chrUn | 45224799 | 45224926 | 128 Sat2CF   | purple | na |
| chrUn | 45302020 | 45302783 | 764 SAT1_CF  | blue   | na |
| chrUn | 45302805 | 45303704 | 900 SAT1_CF  | blue   | na |
| chrUn | 45303732 | 45305690 | 1959 SAT1_CF | blue   | na |
| chrUn | 45305775 | 45306277 | 503 SAT1_CF  | blue   | na |
| chrUn | 45306290 | 45307510 | 1221 SAT1_CF | blue   | na |
| chrUn | 45307576 | 45307733 | 158 SAT1_CF  | blue   | na |
| chrUn | 45307778 | 45308272 | 495 SAT1_CF  | blue   | na |
| chrUn | 45308292 | 45308973 | 682 SAT1_CF  | blue   | na |
| chrUn | 45308985 | 45309662 | 678 SAT1_CF  | blue   | na |
| chrUn | 45309705 | 45310539 | 835 SAT1_CF  | blue   | na |
| chrUn | 45310589 | 45311150 | 562 SAT1_CF  | blue   | na |
| chrUn | 45312531 | 45313057 | 527 SAT1_CF  | blue   | na |
| chrUn | 45313126 | 45314158 | 1033 SAT1_CF | blue   | na |
| chrUn | 45314223 | 45314380 | 158 SAT1_CF  | blue   | na |
| chrUn | 45314425 | 45315015 | 591 SAT1_CF  | blue   | na |
| chrUn | 45315034 | 45316355 | 1322 SAT1_CF | blue   | na |
| chrUn | 45316371 | 45318130 | 1760 SAT1_CF | blue   | na |
| chrUn | 45318142 | 45319033 | 892 SAT1_CF  | blue   | na |
| chrUn | 45319046 | 45321195 | 2150 SAT1_CF | blue   | na |
| chrUn | 45321206 | 45321529 | 324 SAT1_CF  | blue   | na |
| chrUn | 45321578 | 45322080 | 503 SAT1_CF  | blue   | na |
| chrUn | 45322092 | 45322724 | 633 SAT1_CF  | blue   | na |
| chrUn | 45322750 | 45323916 | 1167 SAT1_CF | blue   | na |
| chrUn | 45323931 | 45324451 | 521 SAT1_CF  | blue   | na |
| chrUn | 45324464 | 45325070 | 607 SAT1_CF  | blue   | na |
| chrUn | 45325082 | 45326291 | 1210 SAT1_CF | blue   | na |
| chrUn | 45326306 | 45327010 | 705 SAT1_CF  | blue   | na |

|       |          |          |              |      |    |
|-------|----------|----------|--------------|------|----|
| chrUn | 45327023 | 45327704 | 682 SAT1_CF  | blue | na |
| chrUn | 45327716 | 45328392 | 677 SAT1_CF  | blue | na |
| chrUn | 45328435 | 45330492 | 2058 SAT1_CF | blue | na |
| chrUn | 45330534 | 45332425 | 1892 SAT1_CF | blue | na |
| chrUn | 45332446 | 45333091 | 646 SAT1_CF  | blue | na |
| chrUn | 45341114 | 45341785 | 672 CarSat1  | red  | na |
| chrUn | 45341806 | 45346680 | 4875 CarSat1 | red  | na |
| chrUn | 45346712 | 45347195 | 484 CarSat1  | red  | na |
| chrUn | 45347228 | 45347931 | 704 CarSat1  | red  | na |
| chrUn | 45347961 | 45348888 | 928 CarSat1  | red  | na |
| chrUn | 45348913 | 45350361 | 1449 CarSat1 | red  | na |
| chrUn | 45350386 | 45354049 | 3664 CarSat1 | red  | na |
| chrUn | 45354065 | 45354559 | 495 CarSat1  | red  | na |
| chrUn | 45354593 | 45355515 | 923 CarSat1  | red  | na |
| chrUn | 45355540 | 45356254 | 715 CarSat1  | red  | na |
| chrUn | 45356279 | 45359203 | 2925 CarSat1 | red  | na |
| chrUn | 45359228 | 45359946 | 719 CarSat1  | red  | na |
| chrUn | 45359962 | 45362156 | 2195 CarSat1 | red  | na |
| chrUn | 45362172 | 45362884 | 713 CarSat1  | red  | na |
| chrUn | 45362909 | 45365829 | 2921 CarSat1 | red  | na |
| chrUn | 45365854 | 45366764 | 911 CarSat1  | red  | na |
| chrUn | 45368150 | 45369294 | 1145 CarSat1 | red  | na |
| chrUn | 45369324 | 45370248 | 925 CarSat1  | red  | na |
| chrUn | 45370277 | 45370993 | 717 CarSat1  | red  | na |
| chrUn | 45371009 | 45371721 | 713 CarSat1  | red  | na |
| chrUn | 45371746 | 45372456 | 711 CarSat1  | red  | na |
| chrUn | 45372481 | 45373199 | 719 CarSat1  | red  | na |
| chrUn | 45373215 | 45375783 | 2569 CarSat1 | red  | na |
| chrUn | 45375831 | 45376534 | 704 CarSat1  | red  | na |
| chrUn | 45376550 | 45377517 | 968 CarSat1  | red  | na |
| chrUn | 45377538 | 45378006 | 469 CarSat1  | red  | na |
| chrUn | 45378022 | 45378735 | 714 CarSat1  | red  | na |
| chrUn | 45378760 | 45379988 | 1229 CarSat1 | red  | na |
| chrUn | 45380019 | 45380468 | 450 CarSat1  | red  | na |
| chrUn | 45380485 | 45381853 | 1369 CarSat1 | red  | na |
| chrUn | 45382052 | 45382151 | 100 CarSat1  | red  | na |
| chrUn | 45382169 | 45382765 | 597 CarSat1  | red  | na |
| chrUn | 45385293 | 45385952 | 660 SAT1_CF  | blue | na |
| chrUn | 45385990 | 45386951 | 962 SAT1_CF  | blue | na |
| chrUn | 45386995 | 45388669 | 1675 SAT1_CF | blue | na |
| chrUn | 45388681 | 45389157 | 477 SAT1_CF  | blue | na |
| chrUn | 45389227 | 45389899 | 673 SAT1_CF  | blue | na |

|       |          |          |              |      |    |
|-------|----------|----------|--------------|------|----|
| chrUn | 45389911 | 45390668 | 758 SAT1_CF  | blue | na |
| chrUn | 45390680 | 45391356 | 677 SAT1_CF  | blue | na |
| chrUn | 45391375 | 45391874 | 500 SAT1_CF  | blue | na |
| chrUn | 45391914 | 45392872 | 959 SAT1_CF  | blue | na |
| chrUn | 45392916 | 45393915 | 1000 SAT1_CF | blue | na |
| chrUn | 45393958 | 45394634 | 677 SAT1_CF  | blue | na |
| chrUn | 45394646 | 45395148 | 503 SAT1_CF  | blue | na |
| chrUn | 45395188 | 45396931 | 1744 SAT1_CF | blue | na |
| chrUn | 45396943 | 45398246 | 1304 SAT1_CF | blue | na |
| chrUn | 45398261 | 45399531 | 1271 SAT1_CF | blue | na |
| chrUn | 45399554 | 45399659 | 106 SAT1_CF  | blue | na |
| chrUn | 45399672 | 45400192 | 521 SAT1_CF  | blue | na |
| chrUn | 45400213 | 45400393 | 181 SAT1_CF  | blue | na |
| chrUn | 45400575 | 45401346 | 772 SAT1_CF  | blue | na |
| chrUn | 45401359 | 45402076 | 718 SAT1_CF  | blue | na |
| chrUn | 45402101 | 45402745 | 645 SAT1_CF  | blue | na |
| chrUn | 45402757 | 45403434 | 678 SAT1_CF  | blue | na |
| chrUn | 45403446 | 45404973 | 1528 SAT1_CF | blue | na |
| chrUn | 45404988 | 45406061 | 1074 SAT1_CF | blue | na |
| chrUn | 45406086 | 45406795 | 710 SAT1_CF  | blue | na |
| chrUn | 45406806 | 45407933 | 1128 SAT1_CF | blue | na |
| chrUn | 45407951 | 45408432 | 482 SAT1_CF  | blue | na |
| chrUn | 45408502 | 45409013 | 512 SAT1_CF  | blue | na |
| chrUn | 45409233 | 45409803 | 571 SAT1_CF  | blue | na |
| chrUn | 45409839 | 45411357 | 1519 SAT1_CF | blue | na |
| chrUn | 45411369 | 45412606 | 1238 SAT1_CF | blue | na |
| chrUn | 45412723 | 45413075 | 353 SAT1_CF  | blue | na |
| chrUn | 45413088 | 45413597 | 510 SAT1_CF  | blue | na |
| chrUn | 45413628 | 45414458 | 831 SAT1_CF  | blue | na |
| chrUn | 45414519 | 45415195 | 677 SAT1_CF  | blue | na |
| chrUn | 45415207 | 45415830 | 624 SAT1_CF  | blue | na |
| chrUn | 45415844 | 45416938 | 1095 SAT1_CF | blue | na |
| chrUn | 45417035 | 45417171 | 137 SAT1_CF  | blue | na |
| chrUn | 45417186 | 45417710 | 525 SAT1_CF  | blue | na |
| chrUn | 45417761 | 45418168 | 408 SAT1_CF  | blue | na |
| chrUn | 45418252 | 45418796 | 545 SAT1_CF  | blue | na |
| chrUn | 45418881 | 45420010 | 1130 SAT1_CF | blue | na |
| chrUn | 45420668 | 45421298 | 631 SAT1_CF  | blue | na |
| chrUn | 45421341 | 45422018 | 678 SAT1_CF  | blue | na |
| chrUn | 45422030 | 45422737 | 708 SAT1_CF  | blue | na |
| chrUn | 45422758 | 45422867 | 110 SAT1_CF  | blue | na |
| chrUn | 45422879 | 45423397 | 519 SAT1_CF  | blue | na |

|       |          |          |      |         |      |    |
|-------|----------|----------|------|---------|------|----|
| chrUn | 45423440 | 45423785 | 346  | SAT1_CF | blue | na |
| chrUn | 45423829 | 45425372 | 1544 | SAT1_CF | blue | na |
| chrUn | 45425384 | 45425942 | 559  | SAT1_CF | blue | na |
| chrUn | 45426007 | 45426553 | 547  | SAT1_CF | blue | na |
| chrUn | 45426596 | 45427401 | 806  | SAT1_CF | blue | na |
| chrUn | 45428485 | 45428885 | 401  | SAT1_CF | blue | na |
| chrUn | 45428897 | 45430093 | 1197 | SAT1_CF | blue | na |
| chrUn | 45430129 | 45430314 | 186  | SAT1_CF | blue | na |
| chrUn | 45430495 | 45432213 | 1719 | SAT1_CF | blue | na |
| chrUn | 45432226 | 45432727 | 502  | SAT1_CF | blue | na |
| chrUn | 45432767 | 45433747 | 981  | SAT1_CF | blue | na |
| chrUn | 45433808 | 45434385 | 578  | SAT1_CF | blue | na |
| chrUn | 45434438 | 45436444 | 2007 | SAT1_CF | blue | na |
| chrUn | 45436523 | 45436994 | 472  | SAT1_CF | blue | na |
| chrUn | 45437067 | 45441521 | 4455 | SAT1_CF | blue | na |
| chrUn | 45441534 | 45442016 | 483  | SAT1_CF | blue | na |
| chrUn | 45442076 | 45442478 | 403  | SAT1_CF | blue | na |
| chrUn | 45442491 | 45444265 | 1775 | SAT1_CF | blue | na |
| chrUn | 45444285 | 45444759 | 475  | SAT1_CF | blue | na |
| chrUn | 45444822 | 45445392 | 571  | SAT1_CF | blue | na |
| chrUn | 45445415 | 45445960 | 546  | SAT1_CF | blue | na |
| chrUn | 45445974 | 45446856 | 883  | SAT1_CF | blue | na |
| chrUn | 45446900 | 45448144 | 1245 | SAT1_CF | blue | na |
| chrUn | 45448164 | 45448272 | 109  | SAT1_CF | blue | na |
| chrUn | 45448285 | 45448805 | 521  | SAT1_CF | blue | na |
| chrUn | 45448822 | 45449007 | 186  | SAT1_CF | blue | na |
| chrUn | 45449188 | 45449353 | 166  | SAT1_CF | blue | na |
| chrUn | 45449395 | 45450940 | 1546 | SAT1_CF | blue | na |
| chrUn | 45450951 | 45451963 | 1013 | SAT1_CF | blue | na |
| chrUn | 45452007 | 45452681 | 675  | SAT1_CF | blue | na |
| chrUn | 45452693 | 45453376 | 684  | SAT1_CF | blue | na |
| chrUn | 45453390 | 45453890 | 501  | SAT1_CF | blue | na |
| chrUn | 45453930 | 45454865 | 936  | SAT1_CF | blue | na |
| chrUn | 45454883 | 45455233 | 351  | SAT1_CF | blue | na |
| chrUn | 45455245 | 45455788 | 544  | SAT1_CF | blue | na |
| chrUn | 45455830 | 45456690 | 861  | SAT1_CF | blue | na |
| chrUn | 45456704 | 45457385 | 682  | SAT1_CF | blue | na |
| chrUn | 45457397 | 45457951 | 555  | SAT1_CF | blue | na |
| chrUn | 45457973 | 45458080 | 108  | SAT1_CF | blue | na |
| chrUn | 45458100 | 45458611 | 512  | SAT1_CF | blue | na |
| chrUn | 45458630 | 45458757 | 128  | SAT1_CF | blue | na |
| chrUn | 45458809 | 45461372 | 2564 | SAT1_CF | blue | na |

|       |          |          |              |        |    |
|-------|----------|----------|--------------|--------|----|
| chrUn | 45461385 | 45462975 | 1591 SAT1_CF | blue   | na |
| chrUn | 45463018 | 45463691 | 674 SAT1_CF  | blue   | na |
| chrUn | 45463705 | 45464462 | 758 SAT1_CF  | blue   | na |
| chrUn | 45464474 | 45464993 | 520 SAT1_CF  | blue   | na |
| chrUn | 45465019 | 45465175 | 157 SAT1_CF  | blue   | na |
| chrUn | 45465226 | 45467053 | 1828 SAT1_CF | blue   | na |
| chrUn | 45467096 | 45467764 | 669 SAT1_CF  | blue   | na |
| chrUn | 45467782 | 45468426 | 645 SAT1_CF  | blue   | na |
| chrUn | 45468439 | 45469713 | 1275 SAT1_CF | blue   | na |
| chrUn | 45469758 | 45469897 | 140 SAT1_CF  | blue   | na |
| chrUn | 45657314 | 45658013 | 700 Sat2CF   | purple | na |
| chrUn | 45657389 | 45658237 | 849 Sat2CF   | purple | na |
| chrUn | 45657785 | 45658299 | 515 Sat2CF   | purple | na |
| chrUn | 45745249 | 45746550 | 1302 SAT1_CF | blue   | na |
| chrUn | 45746576 | 45746733 | 158 SAT1_CF  | blue   | na |
| chrUn | 45746748 | 45748100 | 1353 SAT1_CF | blue   | na |
| chrUn | 45748162 | 45748721 | 560 SAT1_CF  | blue   | na |
| chrUn | 45748786 | 45748941 | 156 SAT1_CF  | blue   | na |
| chrUn | 45749193 | 45749679 | 487 SAT1_CF  | blue   | na |
| chrUn | 45749730 | 45750230 | 501 SAT1_CF  | blue   | na |
| chrUn | 45750242 | 45751185 | 944 SAT1_CF  | blue   | na |
| chrUn | 45751254 | 45751931 | 678 SAT1_CF  | blue   | na |
| chrUn | 45751943 | 45752626 | 684 SAT1_CF  | blue   | na |
| chrUn | 45752646 | 45753139 | 494 SAT1_CF  | blue   | na |
| chrUn | 45753228 | 45754197 | 970 SAT1_CF  | blue   | na |
| chrUn | 45756455 | 45757201 | 747 SAT1_CF  | blue   | na |
| chrUn | 45757229 | 45757850 | 622 SAT1_CF  | blue   | na |
| chrUn | 45757897 | 45758571 | 675 SAT1_CF  | blue   | na |
| chrUn | 45758583 | 45759134 | 552 SAT1_CF  | blue   | na |
| chrUn | 45759177 | 45760620 | 1444 SAT1_CF | blue   | na |
| chrUn | 45760674 | 45761445 | 772 SAT1_CF  | blue   | na |
| chrUn | 45761459 | 45762184 | 726 SAT1_CF  | blue   | na |
| chrUn | 45762228 | 45763017 | 790 SAT1_CF  | blue   | na |
| chrUn | 45763059 | 45764133 | 1075 SAT1_CF | blue   | na |
| chrUn | 45763527 | 45764776 | 1250 SAT1_CF | blue   | na |
| chrUn | 45764816 | 45765391 | 576 SAT1_CF  | blue   | na |
| chrUn | 45765410 | 45766814 | 1405 SAT1_CF | blue   | na |
| chrUn | 45766857 | 45767532 | 676 SAT1_CF  | blue   | na |
| chrUn | 45767544 | 45768225 | 682 SAT1_CF  | blue   | na |
| chrUn | 45768238 | 45768780 | 543 SAT1_CF  | blue   | na |
| chrUn | 45768824 | 45769524 | 701 SAT1_CF  | blue   | na |
| chrUn | 45769713 | 45770713 | 1001 SAT1_CF | blue   | na |

|       |          |          |              |      |    |
|-------|----------|----------|--------------|------|----|
| chrUn | 45770725 | 45771244 | 520 SAT1_CF  | blue | na |
| chrUn | 45771259 | 45771339 | 81 SAT1_CF   | blue | na |
| chrUn | 45771352 | 45772147 | 796 SAT1_CF  | blue | na |
| chrUn | 45772163 | 45772839 | 677 SAT1_CF  | blue | na |
| chrUn | 45772851 | 45774680 | 1830 SAT1_CF | blue | na |
| chrUn | 45774724 | 45774925 | 202 SAT1_CF  | blue | na |
| chrUn | 45774946 | 45775615 | 670 SAT1_CF  | blue | na |
| chrUn | 45775633 | 45776127 | 495 SAT1_CF  | blue | na |
| chrUn | 45776171 | 45776350 | 180 SAT1_CF  | blue | na |
| chrUn | 45776394 | 45776904 | 511 SAT1_CF  | blue | na |
| chrUn | 45777022 | 45778053 | 1032 SAT1_CF | blue | na |
| chrUn | 45778095 | 45778953 | 859 SAT1_CF  | blue | na |
| chrUn | 45778965 | 45779760 | 796 SAT1_CF  | blue | na |
| chrUn | 45779835 | 45782198 | 2364 SAT1_CF | blue | na |
| chrUn | 45782210 | 45783490 | 1281 SAT1_CF | blue | na |
| chrUn | 45783558 | 45784841 | 1284 SAT1_CF | blue | na |
| chrUn | 45784883 | 45785054 | 172 SAT1_CF  | blue | na |
| chrUn | 45785068 | 45785610 | 543 SAT1_CF  | blue | na |
| chrUn | 45785630 | 45785739 | 110 SAT1_CF  | blue | na |
| chrUn | 45785751 | 45786306 | 556 SAT1_CF  | blue | na |
| chrUn | 45786329 | 45786437 | 109 SAT1_CF  | blue | na |
| chrUn | 45786449 | 45786969 | 521 SAT1_CF  | blue | na |
| chrUn | 45786998 | 45788659 | 1662 SAT1_CF | blue | na |
| chrUn | 45831635 | 45832229 | 595 SAT1_CF  | blue | na |
| chrUn | 45832309 | 45832818 | 510 SAT1_CF  | blue | na |
| chrUn | 45832831 | 45833186 | 356 SAT1_CF  | blue | na |
| chrUn | 45833273 | 45833816 | 544 SAT1_CF  | blue | na |
| chrUn | 45833828 | 45835328 | 1501 SAT1_CF | blue | na |
| chrUn | 45835372 | 45835921 | 550 SAT1_CF  | blue | na |
| chrUn | 45835986 | 45836143 | 158 SAT1_CF  | blue | na |
| chrUn | 45836188 | 45836766 | 579 SAT1_CF  | blue | na |
| chrUn | 45836829 | 45837384 | 556 SAT1_CF  | blue | na |
| chrUn | 45837396 | 45838074 | 679 SAT1_CF  | blue | na |
| chrUn | 45838117 | 45840404 | 2288 SAT1_CF | blue | na |
| chrUn | 45840448 | 45840997 | 550 SAT1_CF  | blue | na |
| chrUn | 45841040 | 45841668 | 629 SAT1_CF  | blue | na |
| chrUn | 45841695 | 45842625 | 931 SAT1_CF  | blue | na |
| chrUn | 45842668 | 45843209 | 542 SAT1_CF  | blue | na |
| chrUn | 45843280 | 45843831 | 552 SAT1_CF  | blue | na |
| chrUn | 45843876 | 45847952 | 4077 SAT1_CF | blue | na |
| chrUn | 45847970 | 45848823 | 854 SAT1_CF  | blue | na |
| chrUn | 45849141 | 45849801 | 661 SAT1_CF  | blue | na |

|       |          |          |              |      |    |
|-------|----------|----------|--------------|------|----|
| chrUn | 45849880 | 45850794 | 915 SAT1_CF  | blue | na |
| chrUn | 45850881 | 45851382 | 502 SAT1_CF  | blue | na |
| chrUn | 45851401 | 45851504 | 104 SAT1_CF  | blue | na |
| chrUn | 45851525 | 45852068 | 544 SAT1_CF  | blue | na |
| chrUn | 45852113 | 45852933 | 821 SAT1_CF  | blue | na |
| chrUn | 45852964 | 45853510 | 547 SAT1_CF  | blue | na |
| chrUn | 45853530 | 45854212 | 683 SAT1_CF  | blue | na |
| chrUn | 45854235 | 45854901 | 667 SAT1_CF  | blue | na |
| chrUn | 45854944 | 45855573 | 630 SAT1_CF  | blue | na |
| chrUn | 45855601 | 45856807 | 1207 SAT1_CF | blue | na |
| chrUn | 45856822 | 45856958 | 137 SAT1_CF  | blue | na |
| chrUn | 45857024 | 45857524 | 501 SAT1_CF  | blue | na |
| chrUn | 45857546 | 45858178 | 633 SAT1_CF  | blue | na |
| chrUn | 45858191 | 45859022 | 832 SAT1_CF  | blue | na |
| chrUn | 45859049 | 45859573 | 525 SAT1_CF  | blue | na |
| chrUn | 45859618 | 45860910 | 1293 SAT1_CF | blue | na |
| chrUn | 45860991 | 45861217 | 227 SAT1_CF  | blue | na |
| chrUn | 45861228 | 45862006 | 779 SAT1_CF  | blue | na |
| chrUn | 45862037 | 45862565 | 529 SAT1_CF  | blue | na |
| chrUn | 45862583 | 45862686 | 104 SAT1_CF  | blue | na |
| chrUn | 45862707 | 45863280 | 574 SAT1_CF  | blue | na |
| chrUn | 45863292 | 45863975 | 684 SAT1_CF  | blue | na |
| chrUn | 45863987 | 45864747 | 761 SAT1_CF  | blue | na |
| chrUn | 45864761 | 45865465 | 705 SAT1_CF  | blue | na |
| chrUn | 45865508 | 45866157 | 650 SAT1_CF  | blue | na |
| chrUn | 45866184 | 45866880 | 697 SAT1_CF  | blue | na |
| chrUn | 45866945 | 45867102 | 158 SAT1_CF  | blue | na |
| chrUn | 45867147 | 45867648 | 502 SAT1_CF  | blue | na |
| chrUn | 45867669 | 45868264 | 596 SAT1_CF  | blue | na |
| chrUn | 45868276 | 45868955 | 680 SAT1_CF  | blue | na |
| chrUn | 45868998 | 45869960 | 963 SAT1_CF  | blue | na |
| chrUn | 45870039 | 45871871 | 1833 SAT1_CF | blue | na |
| chrUn | 45871883 | 45872823 | 941 SAT1_CF  | blue | na |
| chrUn | 45915840 | 45917183 | 1344 SAT1_CF | blue | na |
| chrUn | 45917375 | 45918408 | 1034 SAT1_CF | blue | na |
| chrUn | 45918589 | 45918723 | 135 SAT1_CF  | blue | na |
| chrUn | 45918810 | 45919309 | 500 SAT1_CF  | blue | na |
| chrUn | 45919322 | 45919935 | 614 SAT1_CF  | blue | na |
| chrUn | 45919947 | 45920657 | 711 SAT1_CF  | blue | na |
| chrUn | 45920679 | 45920777 | 99 SAT1_CF   | blue | na |
| chrUn | 45920798 | 45921353 | 556 SAT1_CF  | blue | na |
| chrUn | 45921365 | 45922227 | 863 SAT1_CF  | blue | na |



|       |          |          |              |      |    |
|-------|----------|----------|--------------|------|----|
| chrUn | 45922280 | 45923049 | 770 SAT1_CF  | blue | na |
| chrUn | 45923159 | 45923698 | 540 SAT1_CF  | blue | na |
| chrUn | 45923721 | 45924116 | 396 SAT1_CF  | blue | na |
| chrUn | 45924156 | 45924656 | 501 SAT1_CF  | blue | na |
| chrUn | 45924674 | 45925721 | 1048 SAT1_CF | blue | na |
| chrUn | 45925742 | 45926284 | 543 SAT1_CF  | blue | na |
| chrUn | 45926354 | 45927556 | 1203 SAT1_CF | blue | na |
| chrUn | 45927600 | 45927906 | 307 SAT1_CF  | blue | na |
| chrUn | 45927987 | 45928839 | 853 SAT1_CF  | blue | na |
| chrUn | 45928869 | 45929827 | 959 SAT1_CF  | blue | na |
| chrUn | 45929877 | 45930576 | 700 SAT1_CF  | blue | na |
| chrUn | 45930627 | 45931686 | 1060 SAT1_CF | blue | na |
| chrUn | 45931756 | 45932655 | 900 SAT1_CF  | blue | na |
| chrUn | 45932680 | 45933499 | 820 SAT1_CF  | blue | na |
| chrUn | 45934914 | 45935487 | 574 SAT1_CF  | blue | na |
| chrUn | 45935508 | 45936029 | 522 SAT1_CF  | blue | na |
| chrUn | 45936056 | 45936145 | 90 SAT1_CF   | blue | na |
| chrUn | 45936169 | 45937388 | 1220 SAT1_CF | blue | na |
| chrUn | 45937408 | 45937956 | 549 SAT1_CF  | blue | na |
| chrUn | 45937989 | 45938387 | 399 SAT1_CF  | blue | na |
| chrUn | 45938411 | 45938930 | 520 SAT1_CF  | blue | na |
| chrUn | 45938956 | 45939920 | 965 SAT1_CF  | blue | na |
| chrUn | 45939932 | 45941143 | 1212 SAT1_CF | blue | na |
| chrUn | 45941155 | 45942011 | 857 SAT1_CF  | blue | na |
| chrUn | 45942091 | 45943685 | 1595 SAT1_CF | blue | na |
| chrUn | 45943713 | 45943849 | 137 SAT1_CF  | blue | na |
| chrUn | 45943915 | 45944415 | 501 SAT1_CF  | blue | na |
| chrUn | 45944437 | 45945798 | 1362 SAT1_CF | blue | na |
| chrUn | 45945840 | 45947377 | 1538 SAT1_CF | blue | na |
| chrUn | 45947457 | 45947966 | 510 SAT1_CF  | blue | na |
| chrUn | 45948042 | 45948613 | 572 SAT1_CF  | blue | na |
| chrUn | 45948626 | 45949994 | 1369 SAT1_CF | blue | na |
| chrUn | 45950036 | 45951021 | 986 SAT1_CF  | blue | na |
| chrUn | 45951047 | 45952535 | 1489 SAT1_CF | blue | na |
| chrUn | 45952547 | 45953232 | 686 SAT1_CF  | blue | na |
| chrUn | 45953250 | 45953920 | 671 SAT1_CF  | blue | na |
| chrUn | 45953963 | 45955075 | 1113 SAT1_CF | blue | na |
| chrUn | 45955118 | 45955702 | 585 SAT1_CF  | blue | na |
| chrUn | 45955714 | 45956591 | 878 SAT1_CF  | blue | na |
| chrUn | 46005130 | 46005834 | 705 CarSat1  | red  | na |
| chrUn | 46005864 | 46007530 | 1667 CarSat1 | red  | na |
| chrUn | 46007555 | 46008781 | 1227 CarSat1 | red  | na |

|       |          |          |      |         |      |    |
|-------|----------|----------|------|---------|------|----|
| chrUn | 46008811 | 46009532 | 722  | CarSat1 | red  | na |
| chrUn | 46009547 | 46010253 | 707  | CarSat1 | red  | na |
| chrUn | 46010846 | 46012682 | 1837 | CarSat1 | red  | na |
| chrUn | 46012715 | 46015643 | 2929 | CarSat1 | red  | na |
| chrUn | 46015676 | 46016915 | 1240 | CarSat1 | red  | na |
| chrUn | 46016930 | 46017657 | 728  | CarSat1 | red  | na |
| chrUn | 46017672 | 46018397 | 726  | CarSat1 | red  | na |
| chrUn | 46018412 | 46019137 | 726  | CarSat1 | red  | na |
| chrUn | 46019152 | 46019879 | 728  | CarSat1 | red  | na |
| chrUn | 46019894 | 46020614 | 721  | CarSat1 | red  | na |
| chrUn | 46020629 | 46021339 | 711  | CarSat1 | red  | na |
| chrUn | 46021369 | 46023029 | 1661 | CarSat1 | red  | na |
| chrUn | 46023062 | 46023564 | 503  | CarSat1 | red  | na |
| chrUn | 46023579 | 46024286 | 708  | CarSat1 | red  | na |
| chrUn | 46024316 | 46026726 | 2411 | CarSat1 | red  | na |
| chrUn | 46026759 | 46027462 | 704  | CarSat1 | red  | na |
| chrUn | 46028859 | 46029654 | 796  | CarSat1 | red  | na |
| chrUn | 46029669 | 46030396 | 728  | CarSat1 | red  | na |
| chrUn | 46030411 | 46031338 | 928  | CarSat1 | red  | na |
| chrUn | 46031371 | 46031872 | 502  | CarSat1 | red  | na |
| chrUn | 46031887 | 46032610 | 724  | CarSat1 | red  | na |
| chrUn | 46032625 | 46033336 | 712  | CarSat1 | red  | na |
| chrUn | 46033366 | 46035771 | 2406 | CarSat1 | red  | na |
| chrUn | 46035804 | 46036512 | 709  | CarSat1 | red  | na |
| chrUn | 46036545 | 46037769 | 1225 | CarSat1 | red  | na |
| chrUn | 46037799 | 46038520 | 722  | CarSat1 | red  | na |
| chrUn | 46038535 | 46039254 | 720  | CarSat1 | red  | na |
| chrUn | 46039271 | 46039993 | 723  | CarSat1 | red  | na |
| chrUn | 46040008 | 46042408 | 2401 | CarSat1 | red  | na |
| chrUn | 46042441 | 46042947 | 507  | CarSat1 | red  | na |
| chrUn | 46042962 | 46044149 | 1188 | CarSat1 | red  | na |
| chrUn | 46044170 | 46045367 | 1198 | CarSat1 | red  | na |
| chrUn | 46045400 | 46045900 | 501  | CarSat1 | red  | na |
| chrUn | 46045915 | 46046636 | 722  | CarSat1 | red  | na |
| chrUn | 46046651 | 46047372 | 722  | CarSat1 | red  | na |
| chrUn | 46047387 | 46047831 | 445  | CarSat1 | red  | na |
| chrUn | 46061195 | 46061836 | 642  | SAT1_CF | blue | na |
| chrUn | 46061857 | 46062236 | 380  | SAT1_CF | blue | na |
| chrUn | 46062269 | 46064615 | 2347 | SAT1_CF | blue | na |
| chrUn | 46064627 | 46065309 | 683  | SAT1_CF | blue | na |
| chrUn | 46065322 | 46065843 | 522  | SAT1_CF | blue | na |
| chrUn | 46065872 | 46066046 | 175  | SAT1_CF | blue | na |

|       |          |          |              |      |    |
|-------|----------|----------|--------------|------|----|
| chrUn | 46066059 | 46067122 | 1064 SAT1_CF | blue | na |
| chrUn | 46067139 | 46068398 | 1260 SAT1_CF | blue | na |
| chrUn | 46068410 | 46069519 | 1110 SAT1_CF | blue | na |
| chrUn | 46069620 | 46070132 | 513 SAT1_CF  | blue | na |
| chrUn | 46070157 | 46071056 | 900 SAT1_CF  | blue | na |
| chrUn | 46071076 | 46071757 | 682 SAT1_CF  | blue | na |
| chrUn | 46071770 | 46072272 | 503 SAT1_CF  | blue | na |
| chrUn | 46072317 | 46072473 | 157 SAT1_CF  | blue | na |
| chrUn | 46072525 | 46073697 | 1173 SAT1_CF | blue | na |
| chrUn | 46073709 | 46074314 | 606 SAT1_CF  | blue | na |
| chrUn | 46074327 | 46074848 | 522 SAT1_CF  | blue | na |
| chrUn | 46074877 | 46075415 | 539 SAT1_CF  | blue | na |
| chrUn | 46075441 | 46075684 | 244 SAT1_CF  | blue | na |
| chrUn | 46075700 | 46076244 | 545 SAT1_CF  | blue | na |
| chrUn | 46076286 | 46077116 | 831 SAT1_CF  | blue | na |
| chrUn | 46077129 | 46077631 | 503 SAT1_CF  | blue | na |
| chrUn | 46077676 | 46077833 | 158 SAT1_CF  | blue | na |
| chrUn | 46077898 | 46079058 | 1161 SAT1_CF | blue | na |
| chrUn | 46079071 | 46079521 | 451 SAT1_CF  | blue | na |
| chrUn | 46080932 | 46083098 | 2167 SAT1_CF | blue | na |
| chrUn | 46083112 | 46083605 | 494 SAT1_CF  | blue | na |
| chrUn | 46083616 | 46084299 | 684 SAT1_CF  | blue | na |
| chrUn | 46084311 | 46084992 | 682 SAT1_CF  | blue | na |
| chrUn | 46085006 | 46085507 | 502 SAT1_CF  | blue | na |
| chrUn | 46085604 | 46086109 | 506 SAT1_CF  | blue | na |
| chrUn | 46086216 | 46087400 | 1185 SAT1_CF | blue | na |
| chrUn | 46087454 | 46088302 | 849 SAT1_CF  | blue | na |
| chrUn | 46088314 | 46088795 | 482 SAT1_CF  | blue | na |
| chrUn | 46088868 | 46089355 | 488 SAT1_CF  | blue | na |
| chrUn | 46112471 | 46113044 | 574 CarSat1  | red  | na |
| chrUn | 46113227 | 46113301 | 75 CarSat1   | red  | na |
| chrUn | 46113318 | 46114041 | 724 CarSat1  | red  | na |
| chrUn | 46114073 | 46114797 | 725 CarSat1  | red  | na |
| chrUn | 46114818 | 46116409 | 1592 CarSat1 | red  | na |
| chrUn | 46116430 | 46117219 | 790 CarSat1  | red  | na |
| chrUn | 46117309 | 46119280 | 1972 CarSat1 | red  | na |
| chrUn | 46119282 | 46119994 | 713 SAT1_CF  | blue | na |
| chrUn | 46120039 | 46120795 | 757 SAT1_CF  | blue | na |
| chrUn | 46123480 | 46123710 | 231 SAT1_CF  | blue | na |
| chrUn | 46123779 | 46125144 | 1366 SAT1_CF | blue | na |
| chrUn | 46125173 | 46126402 | 1230 SAT1_CF | blue | na |
| chrUn | 46126413 | 46126812 | 400 SAT1_CF  | blue | na |

|       |          |          |              |        |    |
|-------|----------|----------|--------------|--------|----|
| chrUn | 46126834 | 46127356 | 523 SAT1_CF  | blue   | na |
| chrUn | 46127368 | 46128553 | 1186 SAT1_CF | blue   | na |
| chrUn | 46128597 | 46129126 | 530 SAT1_CF  | blue   | na |
| chrUn | 46129146 | 46129756 | 611 SAT1_CF  | blue   | na |
| chrUn | 46129835 | 46130808 | 974 SAT1_CF  | blue   | na |
| chrUn | 46130821 | 46131162 | 342 SAT1_CF  | blue   | na |
| chrUn | 46132180 | 46132575 | 396 Sat2CF   | purple | na |
| chrUn | 46135041 | 46135175 | 135 CarSat1  | red    | na |
| chrUn | 46135265 | 46136789 | 1525 CarSat1 | red    | na |
| chrUn | 46136816 | 46137224 | 409 CarSat1  | red    | na |
| chrUn | 46145600 | 46146299 | 700 CarSat1  | red    | na |
| chrUn | 46146507 | 46146632 | 126 CarSat1  | red    | na |
| chrUn | 46146658 | 46147368 | 711 CarSat1  | red    | na |
| chrUn | 46147394 | 46148095 | 702 CarSat1  | red    | na |
| chrUn | 46148130 | 46148839 | 710 CarSat1  | red    | na |
| chrUn | 46148865 | 46151991 | 3127 CarSat1 | red    | na |
| chrUn | 46152021 | 46152514 | 494 CarSat1  | red    | na |
| chrUn | 46152539 | 46153464 | 926 CarSat1  | red    | na |
| chrUn | 46153494 | 46154715 | 1222 CarSat1 | red    | na |
| chrUn | 46154740 | 46155209 | 470 CarSat1  | red    | na |
| chrUn | 46155236 | 46155946 | 711 CarSat1  | red    | na |
| chrUn | 46155973 | 46159631 | 3659 CarSat1 | red    | na |
| chrUn | 46159658 | 46160367 | 710 CarSat1  | red    | na |
| chrUn | 46160394 | 46161105 | 712 CarSat1  | red    | na |
| chrUn | 46161132 | 46162548 | 1417 CarSat1 | red    | na |
| chrUn | 46166649 | 46169835 | 3187 CarSat1 | red    | na |
| chrUn | 46169862 | 46172158 | 2297 CarSat1 | red    | na |
| chrUn | 46173127 | 46173672 | 546 CarSat1  | red    | na |
| chrUn | 46173699 | 46175389 | 1691 CarSat1 | red    | na |
| chrUn | 46175414 | 46177356 | 1943 CarSat1 | red    | na |
| chrUn | 46177383 | 46177851 | 469 CarSat1  | red    | na |
| chrUn | 46226857 | 46228216 | 1360 CarSat1 | red    | na |
| chrUn | 46228246 | 46228953 | 708 CarSat1  | red    | na |
| chrUn | 46228983 | 46229691 | 709 CarSat1  | red    | na |
| chrUn | 46229706 | 46229832 | 127 Carsat2  | orange | na |
| chrUn | 46229721 | 46230426 | 706 CarSat1  | red    | na |
| chrUn | 46230456 | 46231164 | 709 CarSat1  | red    | na |
| chrUn | 46231179 | 46231305 | 127 Carsat2  | orange | na |
| chrUn | 46231194 | 46231905 | 712 CarSat1  | red    | na |
| chrUn | 46231935 | 46232643 | 709 CarSat1  | red    | na |
| chrUn | 46232658 | 46232784 | 127 Carsat2  | orange | na |
| chrUn | 46232673 | 46233897 | 1225 CarSat1 | red    | na |

|       |          |          |      |         |        |    |
|-------|----------|----------|------|---------|--------|----|
| chrUn | 46233921 | 46235870 | 1950 | CarSat1 | red    | na |
| chrUn | 46235891 | 46237071 | 1181 | CarSat1 | red    | na |
| chrUn | 46237101 | 46238329 | 1229 | CarSat1 | red    | na |
| chrUn | 46238345 | 46239790 | 1446 | CarSat1 | red    | na |
| chrUn | 46239814 | 46240282 | 469  | CarSat1 | red    | na |
| chrUn | 46240303 | 46244700 | 4398 | CarSat1 | red    | na |
| chrUn | 46244727 | 46245904 | 1178 | CarSat1 | red    | na |
| chrUn | 46245934 | 46249183 | 3250 | CarSat1 | red    | na |
| chrUn | 46251166 | 46251832 | 667  | CarSat1 | red    | na |
| chrUn | 46251847 | 46251970 | 124  | Carsat2 | orange | na |
| chrUn | 46251862 | 46252573 | 712  | CarSat1 | red    | na |
| chrUn | 46252603 | 46253307 | 705  | CarSat1 | red    | na |
| chrUn | 46253322 | 46253448 | 127  | Carsat2 | orange | na |
| chrUn | 46253337 | 46254045 | 709  | CarSat1 | red    | na |
| chrUn | 46254075 | 46255052 | 978  | CarSat1 | red    | na |
| chrUn | 46255073 | 46255518 | 446  | CarSat1 | red    | na |
| chrUn | 46255548 | 46256256 | 709  | CarSat1 | red    | na |
| chrUn | 46256271 | 46256394 | 124  | Carsat2 | orange | na |
| chrUn | 46256286 | 46257999 | 1714 | CarSat1 | red    | na |
| chrUn | 46258029 | 46258740 | 712  | CarSat1 | red    | na |
| chrUn | 46259824 | 46261370 | 1547 | CarSat1 | red    | na |
| chrUn | 46261385 | 46261499 | 115  | Carsat2 | orange | na |
| chrUn | 46261400 | 46261885 | 486  | CarSat1 | red    | na |
| chrUn | 46261918 | 46262843 | 926  | CarSat1 | red    | na |
| chrUn | 46262873 | 46264314 | 1442 | CarSat1 | red    | na |
| chrUn | 46264344 | 46264829 | 486  | CarSat1 | red    | na |
| chrUn | 46264862 | 46267999 | 3138 | CarSat1 | red    | na |
| chrUn | 46268014 | 46268141 | 128  | Carsat2 | orange | na |
| chrUn | 46268029 | 46268739 | 711  | CarSat1 | red    | na |
| chrUn | 46268754 | 46268881 | 128  | Carsat2 | orange | na |
| chrUn | 46268769 | 46269661 | 893  | CarSat1 | red    | na |
| chrUn | 46318767 | 46319893 | 1127 | Sat2CF  | purple | na |
| chrUn | 46319577 | 46319946 | 370  | Sat2CF  | purple | na |
| chrUn | 46329511 | 46329673 | 163  | Sat2CF  | purple | na |
| chrUn | 46329560 | 46330543 | 984  | Sat2CF  | purple | na |
| chrUn | 46397269 | 46397680 | 412  | SAT1_CF | blue   | na |
| chrUn | 46397693 | 46398375 | 683  | SAT1_CF | blue   | na |
| chrUn | 46398399 | 46399248 | 850  | SAT1_CF | blue   | na |
| chrUn | 46399290 | 46401531 | 2242 | SAT1_CF | blue   | na |
| chrUn | 46401551 | 46402409 | 859  | SAT1_CF | blue   | na |
| chrUn | 46402451 | 46404295 | 1845 | SAT1_CF | blue   | na |
| chrUn | 46404335 | 46405528 | 1194 | SAT1_CF | blue   | na |

|       |          |          |              |      |    |
|-------|----------|----------|--------------|------|----|
| chrUn | 46405539 | 46406031 | 493 SAT1_CF  | blue | na |
| chrUn | 46406045 | 46407543 | 1499 SAT1_CF | blue | na |
| chrUn | 46407554 | 46408223 | 670 SAT1_CF  | blue | na |
| chrUn | 46408235 | 46408918 | 684 SAT1_CF  | blue | na |
| chrUn | 46408930 | 46409567 | 638 SAT1_CF  | blue | na |
| chrUn | 46409610 | 46410153 | 544 SAT1_CF  | blue | na |
| chrUn | 46410172 | 46410338 | 167 SAT1_CF  | blue | na |
| chrUn | 46410370 | 46411183 | 814 SAT1_CF  | blue | na |
| chrUn | 46411226 | 46413216 | 1991 SAT1_CF | blue | na |
| chrUn | 46413303 | 46413926 | 624 SAT1_CF  | blue | na |
| chrUn | 46413947 | 46414501 | 555 SAT1_CF  | blue | na |
| chrUn | 46414513 | 46415195 | 683 SAT1_CF  | blue | na |
| chrUn | 46415207 | 46416092 | 886 SAT1_CF  | blue | na |
| chrUn | 46416114 | 46416965 | 852 SAT1_CF  | blue | na |
| chrUn | 46416978 | 46418334 | 1357 SAT1_CF | blue | na |
| chrUn | 46418348 | 46418993 | 646 SAT1_CF  | blue | na |
| chrUn | 46419004 | 46419305 | 302 SAT1_CF  | blue | na |
| chrUn | 46419385 | 46420120 | 736 SAT1_CF  | blue | na |
| chrUn | 46420146 | 46421089 | 944 SAT1_CF  | blue | na |
| chrUn | 46421102 | 46421950 | 849 SAT1_CF  | blue | na |
| chrUn | 46422027 | 46423075 | 1049 SAT1_CF | blue | na |
| chrUn | 46423097 | 46423761 | 665 SAT1_CF  | blue | na |
| chrUn | 46423804 | 46424895 | 1092 SAT1_CF | blue | na |
| chrUn | 46424914 | 46425803 | 890 SAT1_CF  | blue | na |
| chrUn | 46425839 | 46426340 | 502 SAT1_CF  | blue | na |
| chrUn | 46426353 | 46427025 | 673 SAT1_CF  | blue | na |
| chrUn | 46427068 | 46427700 | 633 SAT1_CF  | blue | na |
| chrUn | 46427728 | 46428290 | 563 SAT1_CF  | blue | na |
| chrUn | 46428333 | 46428853 | 521 SAT1_CF  | blue | na |
| chrUn | 46428875 | 46429008 | 134 SAT1_CF  | blue | na |
| chrUn | 46429093 | 46429710 | 618 SAT1_CF  | blue | na |
| chrUn | 46436519 | 46437256 | 738 SAT1_CF  | blue | na |
| chrUn | 46437268 | 46439296 | 2029 SAT1_CF | blue | na |
| chrUn | 46439340 | 46439903 | 564 SAT1_CF  | blue | na |
| chrUn | 46439982 | 46440507 | 526 SAT1_CF  | blue | na |
| chrUn | 46440522 | 46440679 | 158 SAT1_CF  | blue | na |
| chrUn | 46440724 | 46441225 | 502 SAT1_CF  | blue | na |
| chrUn | 46441238 | 46441902 | 665 SAT1_CF  | blue | na |
| chrUn | 46441945 | 46442577 | 633 SAT1_CF  | blue | na |
| chrUn | 46442605 | 46443167 | 563 SAT1_CF  | blue | na |
| chrUn | 46443210 | 46443403 | 194 SAT1_CF  | blue | na |
| chrUn | 46494014 | 46494426 | 413 CarSat1  | red  | na |

|       |          |          |      |         |      |    |
|-------|----------|----------|------|---------|------|----|
| chrUn | 46495394 | 46496645 | 1252 | CarSat1 | red  | na |
| chrUn | 46496683 | 46497565 | 883  | CarSat1 | red  | na |
| chrUn | 46497560 | 46499103 | 1544 | SAT1_CF | blue | na |
| chrUn | 46499145 | 46501285 | 2141 | SAT1_CF | blue | na |
| chrUn | 46501298 | 46502266 | 969  | SAT1_CF | blue | na |
| chrUn | 46502312 | 46502834 | 523  | SAT1_CF | blue | na |
| chrUn | 46509086 | 46511073 | 1988 | SAT1_CF | blue | na |
| chrUn | 46511101 | 46511613 | 513  | SAT1_CF | blue | na |
| chrUn | 46511642 | 46513936 | 2295 | SAT1_CF | blue | na |
| chrUn | 46513941 | 46515121 | 1181 | CarSat1 | red  | na |
| chrUn | 46515140 | 46516514 | 1375 | CarSat1 | red  | na |
| chrUn | 46516673 | 46517664 | 992  | CarSat1 | red  | na |
| chrUn | 46532993 | 46534210 | 1218 | SAT1_CF | blue | na |
| chrUn | 46534225 | 46534382 | 158  | SAT1_CF | blue | na |
| chrUn | 46534408 | 46536327 | 1920 | SAT1_CF | blue | na |
| chrUn | 46536355 | 46537548 | 1194 | SAT1_CF | blue | na |
| chrUn | 46537773 | 46537930 | 158  | SAT1_CF | blue | na |
| chrUn | 46537995 | 46538474 | 480  | SAT1_CF | blue | na |
| chrUn | 46538487 | 46538595 | 109  | SAT1_CF | blue | na |
| chrUn | 46538616 | 46539247 | 632  | SAT1_CF | blue | na |
| chrUn | 46539259 | 46539876 | 618  | SAT1_CF | blue | na |
| chrUn | 46541198 | 46541751 | 554  | SAT1_CF | blue | na |
| chrUn | 46541762 | 46542164 | 403  | SAT1_CF | blue | na |
| chrUn | 46542204 | 46543293 | 1090 | SAT1_CF | blue | na |
| chrUn | 46543311 | 46544636 | 1326 | SAT1_CF | blue | na |
| chrUn | 46544679 | 46544985 | 307  | SAT1_CF | blue | na |
| chrUn | 46545063 | 46545571 | 509  | SAT1_CF | blue | na |
| chrUn | 46545654 | 46546235 | 582  | SAT1_CF | blue | na |
| chrUn | 46546257 | 46547008 | 752  | SAT1_CF | blue | na |
| chrUn | 46547021 | 46547636 | 616  | SAT1_CF | blue | na |
| chrUn | 46548034 | 46548852 | 819  | SAT1_CF | blue | na |
| chrUn | 46548875 | 46550463 | 1589 | SAT1_CF | blue | na |
| chrUn | 46550507 | 46552448 | 1942 | SAT1_CF | blue | na |
| chrUn | 46552460 | 46553220 | 761  | SAT1_CF | blue | na |
| chrUn | 46553234 | 46553879 | 646  | SAT1_CF | blue | na |
| chrUn | 46553891 | 46554747 | 857  | SAT1_CF | blue | na |
| chrUn | 46554789 | 46556270 | 1482 | SAT1_CF | blue | na |
| chrUn | 46556281 | 46556840 | 560  | SAT1_CF | blue | na |
| chrUn | 46556854 | 46557978 | 1125 | SAT1_CF | blue | na |
| chrUn | 46558021 | 46559316 | 1296 | SAT1_CF | blue | na |
| chrUn | 46559359 | 46559871 | 513  | SAT1_CF | blue | na |
| chrUn | 46559899 | 46560837 | 939  | SAT1_CF | blue | na |

|       |          |          |              |      |    |
|-------|----------|----------|--------------|------|----|
| chrUn | 46560881 | 46562507 | 1627 SAT1_CF | blue | na |
| chrUn | 46562550 | 46563352 | 803 SAT1_CF  | blue | na |
| chrUn | 46563374 | 46563472 | 99 SAT1_CF   | blue | na |
| chrUn | 46563494 | 46565262 | 1769 SAT1_CF | blue | na |
| chrUn | 46565902 | 46566525 | 624 SAT1_CF  | blue | na |
| chrUn | 46566537 | 46568484 | 1948 SAT1_CF | blue | na |
| chrUn | 46568519 | 46569042 | 524 SAT1_CF  | blue | na |
| chrUn | 46569057 | 46569214 | 158 SAT1_CF  | blue | na |
| chrUn | 46569259 | 46569761 | 503 SAT1_CF  | blue | na |
| chrUn | 46569773 | 46569882 | 110 SAT1_CF  | blue | na |
| chrUn | 46569903 | 46571840 | 1938 SAT1_CF | blue | na |
| chrUn | 46571853 | 46573536 | 1684 SAT1_CF | blue | na |
| chrUn | 46640595 | 46640932 | 338 SAT1_CF  | blue | na |
| chrUn | 46640954 | 46641757 | 804 SAT1_CF  | blue | na |
| chrUn | 46641769 | 46642142 | 374 SAT1_CF  | blue | na |
| chrUn | 46642325 | 46643811 | 1487 SAT1_CF | blue | na |
| chrUn | 46643848 | 46644526 | 679 SAT1_CF  | blue | na |
| chrUn | 46644551 | 46645193 | 643 SAT1_CF  | blue | na |
| chrUn | 46645205 | 46645879 | 675 SAT1_CF  | blue | na |
| chrUn | 46645901 | 46646401 | 501 SAT1_CF  | blue | na |
| chrUn | 46646441 | 46647400 | 960 SAT1_CF  | blue | na |
| chrUn | 46647479 | 46649160 | 1682 SAT1_CF | blue | na |
| chrUn | 46649172 | 46649753 | 582 SAT1_CF  | blue | na |
| chrUn | 46649833 | 46650443 | 611 SAT1_CF  | blue | na |
| chrUn | 46650498 | 46651454 | 957 SAT1_CF  | blue | na |
| chrUn | 46651502 | 46652179 | 678 SAT1_CF  | blue | na |
| chrUn | 46652191 | 46652745 | 555 SAT1_CF  | blue | na |
| chrUn | 46652767 | 46652874 | 108 SAT1_CF  | blue | na |
| chrUn | 46652888 | 46653482 | 595 SAT1_CF  | blue | na |
| chrUn | 46653504 | 46653611 | 108 SAT1_CF  | blue | na |
| chrUn | 46653625 | 46654145 | 521 SAT1_CF  | blue | na |
| chrUn | 46654170 | 46655022 | 853 SAT1_CF  | blue | na |
| chrUn | 46655036 | 46655809 | 774 SAT1_CF  | blue | na |
| chrUn | 46656398 | 46656861 | 464 SAT1_CF  | blue | na |
| chrUn | 46656872 | 46658124 | 1253 SAT1_CF | blue | na |
| chrUn | 46658143 | 46658583 | 441 SAT1_CF  | blue | na |
| chrUn | 46658639 | 46659227 | 589 SAT1_CF  | blue | na |
| chrUn | 46659293 | 46659429 | 137 SAT1_CF  | blue | na |
| chrUn | 46659449 | 46659951 | 503 SAT1_CF  | blue | na |
| chrUn | 46660017 | 46660153 | 137 SAT1_CF  | blue | na |
| chrUn | 46660185 | 46660916 | 732 SAT1_CF  | blue | na |
| chrUn | 46661157 | 46661790 | 634 SAT1_CF  | blue | na |



|       |          |          |      |         |      |    |
|-------|----------|----------|------|---------|------|----|
| chrUn | 46661844 | 46662380 | 537  | SAT1_CF | blue | na |
| chrUn | 46662459 | 46664370 | 1912 | SAT1_CF | blue | na |
| chrUn | 46666832 | 46667060 | 229  | SAT1_CF | blue | na |
| chrUn | 46667075 | 46667600 | 526  | SAT1_CF | blue | na |
| chrUn | 46667643 | 46668210 | 568  | SAT1_CF | blue | na |
| chrUn | 46668240 | 46668582 | 343  | SAT1_CF | blue | na |
| chrUn | 46669786 | 46670245 | 460  | SAT1_CF | blue | na |
| chrUn | 46670263 | 46671112 | 850  | SAT1_CF | blue | na |
| chrUn | 46671147 | 46671774 | 628  | SAT1_CF | blue | na |
| chrUn | 46671798 | 46671904 | 107  | SAT1_CF | blue | na |
| chrUn | 46671916 | 46672518 | 603  | SAT1_CF | blue | na |
| chrUn | 46673232 | 46673461 | 230  | SAT1_CF | blue | na |
| chrUn | 46673488 | 46673968 | 481  | SAT1_CF | blue | na |
| chrUn | 46678245 | 46679021 | 777  | SAT1_CF | blue | na |
| chrUn | 46679068 | 46679574 | 507  | SAT1_CF | blue | na |
| chrUn | 46679599 | 46680654 | 1056 | SAT1_CF | blue | na |
| chrUn | 46680868 | 46681408 | 541  | SAT1_CF | blue | na |
| chrUn | 46681451 | 46681989 | 539  | SAT1_CF | blue | na |
| chrUn | 46682002 | 46682893 | 892  | SAT1_CF | blue | na |
| chrUn | 46682905 | 46684587 | 1683 | SAT1_CF | blue | na |
| chrUn | 46684603 | 46685254 | 652  | SAT1_CF | blue | na |
| chrUn | 46686237 | 46686702 | 466  | SAT1_CF | blue | na |
| chrUn | 46686726 | 46687290 | 565  | SAT1_CF | blue | na |
| chrUn | 46690188 | 46691141 | 954  | SAT1_CF | blue | na |
| chrUn | 46691166 | 46691272 | 107  | SAT1_CF | blue | na |
| chrUn | 46691285 | 46691648 | 364  | SAT1_CF | blue | na |
| chrUn | 46732284 | 46733262 | 979  | SAT1_CF | blue | na |
| chrUn | 46733309 | 46733985 | 677  | SAT1_CF | blue | na |
| chrUn | 46733997 | 46735396 | 1400 | SAT1_CF | blue | na |
| chrUn | 46735421 | 46735525 | 105  | SAT1_CF | blue | na |
| chrUn | 46735545 | 46736020 | 476  | SAT1_CF | blue | na |
| chrUn | 46736099 | 46736204 | 106  | SAT1_CF | blue | na |
| chrUn | 46736219 | 46736846 | 628  | SAT1_CF | blue | na |
| chrUn | 46736857 | 46737488 | 632  | SAT1_CF | blue | na |
| chrUn | 46737510 | 46737617 | 108  | SAT1_CF | blue | na |
| chrUn | 46737630 | 46738132 | 503  | SAT1_CF | blue | na |
| chrUn | 46738170 | 46738574 | 405  | SAT1_CF | blue | na |
| chrUn | 46738624 | 46739296 | 673  | SAT1_CF | blue | na |
| chrUn | 46739308 | 46740835 | 1528 | SAT1_CF | blue | na |
| chrUn | 46740850 | 46741904 | 1055 | SAT1_CF | blue | na |
| chrUn | 46741948 | 46742646 | 699  | SAT1_CF | blue | na |
| chrUn | 46742663 | 46743162 | 500  | SAT1_CF | blue | na |

|       |          |          |              |      |    |
|-------|----------|----------|--------------|------|----|
| chrUn | 46743202 | 46743604 | 403 SAT1_CF  | blue | na |
| chrUn | 46743710 | 46744487 | 778 SAT1_CF  | blue | na |
| chrUn | 46744509 | 46745347 | 839 SAT1_CF  | blue | na |
| chrUn | 46745382 | 46745862 | 481 SAT1_CF  | blue | na |
| chrUn | 46745888 | 46746949 | 1062 SAT1_CF | blue | na |
| chrUn | 46746971 | 46747452 | 482 SAT1_CF  | blue | na |
| chrUn | 46747524 | 46748430 | 907 SAT1_CF  | blue | na |
| chrUn | 46748546 | 46749466 | 921 SAT1_CF  | blue | na |
| chrUn | 46749479 | 46749815 | 337 SAT1_CF  | blue | na |
| chrUn | 46751566 | 46751668 | 103 SAT1_CF  | blue | na |
| chrUn | 46751717 | 46752394 | 678 SAT1_CF  | blue | na |
| chrUn | 46752406 | 46753089 | 684 SAT1_CF  | blue | na |
| chrUn | 46753102 | 46753604 | 503 SAT1_CF  | blue | na |
| chrUn | 46753691 | 46754575 | 885 SAT1_CF  | blue | na |
| chrUn | 46754594 | 46755023 | 430 SAT1_CF  | blue | na |
| chrUn | 46755066 | 46756399 | 1334 SAT1_CF | blue | na |
| chrUn | 46756414 | 46757122 | 709 SAT1_CF  | blue | na |
| chrUn | 46757143 | 46757252 | 110 SAT1_CF  | blue | na |
| chrUn | 46757264 | 46757785 | 522 SAT1_CF  | blue | na |
| chrUn | 46757804 | 46758172 | 369 SAT1_CF  | blue | na |
| chrUn | 46758216 | 46759756 | 1541 SAT1_CF | blue | na |
| chrUn | 46759768 | 46763549 | 3782 SAT1_CF | blue | na |
| chrUn | 46763575 | 46764057 | 483 SAT1_CF  | blue | na |
| chrUn | 46764116 | 46764297 | 182 SAT1_CF  | blue | na |
| chrUn | 46764477 | 46765270 | 794 SAT1_CF  | blue | na |
| chrUn | 46765314 | 46766438 | 1125 SAT1_CF | blue | na |
| chrUn | 46766451 | 46767291 | 841 SAT1_CF  | blue | na |
| chrUn | 46767304 | 46767988 | 685 SAT1_CF  | blue | na |
| chrUn | 46768000 | 46769599 | 1600 SAT1_CF | blue | na |
| chrUn | 46769642 | 46770913 | 1272 SAT1_CF | blue | na |
| chrUn | 46770974 | 46771650 | 677 SAT1_CF  | blue | na |
| chrUn | 46771662 | 46772281 | 620 SAT1_CF  | blue | na |
| chrUn | 46817769 | 46818414 | 646 SAT1_CF  | blue | na |
| chrUn | 46818435 | 46819763 | 1329 SAT1_CF | blue | na |
| chrUn | 46819808 | 46821252 | 1445 SAT1_CF | blue | na |
| chrUn | 46821264 | 46822631 | 1368 SAT1_CF | blue | na |
| chrUn | 46822674 | 46823350 | 677 SAT1_CF  | blue | na |
| chrUn | 46823362 | 46824047 | 686 SAT1_CF  | blue | na |
| chrUn | 46824059 | 46824561 | 503 SAT1_CF  | blue | na |
| chrUn | 46824610 | 46824933 | 324 SAT1_CF  | blue | na |
| chrUn | 46824944 | 46826599 | 1656 SAT1_CF | blue | na |
| chrUn | 46826642 | 46828013 | 1372 SAT1_CF | blue | na |

|       |          |          |              |      |    |
|-------|----------|----------|--------------|------|----|
| chrUn | 46828026 | 46828917 | 892 SAT1_CF  | blue | na |
| chrUn | 46828929 | 46829528 | 600 SAT1_CF  | blue | na |
| chrUn | 46829548 | 46831428 | 1881 SAT1_CF | blue | na |
| chrUn | 46831470 | 46832118 | 649 SAT1_CF  | blue | na |
| chrUn | 46832131 | 46832633 | 503 SAT1_CF  | blue | na |
| chrUn | 46832678 | 46832835 | 158 SAT1_CF  | blue | na |
| chrUn | 46832850 | 46834523 | 1674 SAT1_CF | blue | na |
| chrUn | 46835933 | 46837352 | 1420 SAT1_CF | blue | na |
| chrUn | 46837395 | 46838061 | 667 SAT1_CF  | blue | na |
| chrUn | 46838084 | 46838766 | 683 SAT1_CF  | blue | na |
| chrUn | 46838786 | 46839260 | 475 SAT1_CF  | blue | na |
| chrUn | 46839320 | 46839895 | 576 SAT1_CF  | blue | na |
| chrUn | 46841306 | 46841830 | 525 SAT1_CF  | blue | na |
| chrUn | 46841881 | 46843493 | 1613 SAT1_CF | blue | na |
| chrUn | 46843516 | 46843622 | 107 SAT1_CF  | blue | na |
| chrUn | 46843635 | 46844135 | 501 SAT1_CF  | blue | na |
| chrUn | 46844189 | 46844355 | 167 SAT1_CF  | blue | na |
| chrUn | 46844374 | 46845815 | 1442 SAT1_CF | blue | na |
| chrUn | 46845857 | 46846023 | 167 SAT1_CF  | blue | na |
| chrUn | 46846041 | 46846716 | 676 SAT1_CF  | blue | na |
| chrUn | 46846735 | 46847417 | 683 SAT1_CF  | blue | na |
| chrUn | 46847428 | 46848113 | 686 SAT1_CF  | blue | na |
| chrUn | 46848130 | 46848621 | 492 SAT1_CF  | blue | na |
| chrUn | 46848666 | 46848823 | 158 SAT1_CF  | blue | na |
| chrUn | 46848875 | 46849363 | 489 SAT1_CF  | blue | na |
| chrUn | 46849442 | 46851559 | 2118 SAT1_CF | blue | na |
| chrUn | 46859077 | 46859664 | 588 SAT1_CF  | blue | na |
| chrUn | 46859679 | 46860602 | 924 SAT1_CF  | blue | na |
| chrUn | 46860645 | 46861365 | 721 SAT1_CF  | blue | na |
| chrUn | 46941041 | 46941843 | 803 SAT1_CF  | blue | na |
| chrUn | 46941885 | 46942425 | 541 SAT1_CF  | blue | na |
| chrUn | 46942494 | 46942942 | 449 SAT1_CF  | blue | na |
| chrUn | 46943029 | 46943529 | 501 SAT1_CF  | blue | na |
| chrUn | 46943557 | 46944251 | 695 SAT1_CF  | blue | na |
| chrUn | 46944330 | 46947167 | 2838 SAT1_CF | blue | na |
| chrUn | 46947205 | 46947706 | 502 SAT1_CF  | blue | na |
| chrUn | 46947719 | 46948321 | 603 SAT1_CF  | blue | na |
| chrUn | 46948347 | 46948986 | 640 SAT1_CF  | blue | na |
| chrUn | 46949029 | 46949937 | 909 SAT1_CF  | blue | na |
| chrUn | 46949949 | 46950055 | 107 SAT1_CF  | blue | na |
| chrUn | 46950079 | 46950706 | 628 SAT1_CF  | blue | na |
| chrUn | 46950730 | 46951591 | 862 SAT1_CF  | blue | na |

|       |          |          |              |      |    |
|-------|----------|----------|--------------|------|----|
| chrUn | 46951609 | 46952295 | 687 SAT1_CF  | blue | na |
| chrUn | 46952307 | 46954184 | 1878 SAT1_CF | blue | na |
| chrUn | 46954200 | 46955088 | 889 SAT1_CF  | blue | na |
| chrUn | 46955205 | 46955723 | 519 SAT1_CF  | blue | na |
| chrUn | 46955780 | 46956876 | 1097 SAT1_CF | blue | na |
| chrUn | 46956894 | 46957587 | 694 SAT1_CF  | blue | na |
| chrUn | 46957674 | 46958175 | 502 SAT1_CF  | blue | na |
| chrUn | 46958202 | 46958948 | 747 SAT1_CF  | blue | na |
| chrUn | 46958961 | 46959031 | 71 SAT1_CF   | blue | na |
| chrUn | 46959055 | 46960512 | 1458 SAT1_CF | blue | na |
| chrUn | 46960580 | 46960833 | 254 SAT1_CF  | blue | na |
| chrUn | 46960849 | 46962522 | 1674 SAT1_CF | blue | na |
| chrUn | 46962567 | 46963555 | 989 SAT1_CF  | blue | na |
| chrUn | 46963612 | 46964157 | 546 SAT1_CF  | blue | na |
| chrUn | 46964200 | 46964568 | 369 SAT1_CF  | blue | na |
| chrUn | 46964608 | 46965108 | 501 SAT1_CF  | blue | na |
| chrUn | 46965135 | 46966363 | 1229 SAT1_CF | blue | na |
| chrUn | 46966375 | 46967058 | 684 SAT1_CF  | blue | na |
| chrUn | 46967069 | 46967561 | 493 SAT1_CF  | blue | na |
| chrUn | 46967575 | 46968788 | 1214 SAT1_CF | blue | na |
| chrUn | 46968799 | 46969288 | 490 SAT1_CF  | blue | na |
| chrUn | 46969327 | 46970149 | 823 SAT1_CF  | blue | na |
| chrUn | 46970164 | 46970321 | 158 SAT1_CF  | blue | na |
| chrUn | 46970347 | 46970864 | 518 SAT1_CF  | blue | na |
| chrUn | 46970877 | 46971576 | 700 SAT1_CF  | blue | na |
| chrUn | 46971588 | 46972271 | 684 SAT1_CF  | blue | na |
| chrUn | 46972282 | 46972774 | 493 SAT1_CF  | blue | na |
| chrUn | 46972788 | 46974001 | 1214 SAT1_CF | blue | na |
| chrUn | 46974012 | 46974502 | 491 SAT1_CF  | blue | na |
| chrUn | 46974541 | 46975363 | 823 SAT1_CF  | blue | na |
| chrUn | 46975378 | 46975535 | 158 SAT1_CF  | blue | na |
| chrUn | 46975561 | 46976079 | 519 SAT1_CF  | blue | na |
| chrUn | 46976097 | 46976693 | 597 SAT1_CF  | blue | na |
| chrUn | 46976705 | 46978720 | 2016 SAT1_CF | blue | na |
| chrUn | 46979825 | 46981323 | 1499 CarSat1 | red  | na |
| chrUn | 46981338 | 46984208 | 2871 CarSat1 | red  | na |
| chrUn | 46984359 | 46986401 | 2043 CarSat1 | red  | na |
| chrUn | 46986434 | 46987634 | 1201 CarSat1 | red  | na |
| chrUn | 46987658 | 46988372 | 715 CarSat1  | red  | na |
| chrUn | 46988396 | 46989435 | 1040 CarSat1 | red  | na |
| chrUn | 46989456 | 46992927 | 3472 CarSat1 | red  | na |
| chrUn | 47015411 | 47017899 | 2489 CarSat1 | red  | na |

|       |          |          |      |         |     |    |
|-------|----------|----------|------|---------|-----|----|
| chrUn | 47017932 | 47020116 | 2185 | CarSat1 | red | na |
| chrUn | 47020140 | 47022327 | 2188 | CarSat1 | red | na |
| chrUn | 47022351 | 47023801 | 1451 | CarSat1 | red | na |
| chrUn | 47023825 | 47025048 | 1224 | CarSat1 | red | na |
| chrUn | 47025078 | 47026012 | 935  | CarSat1 | red | na |
| chrUn | 47026036 | 47026521 | 486  | CarSat1 | red | na |
| chrUn | 47026551 | 47027273 | 723  | CarSat1 | red | na |
| chrUn | 47027288 | 47028960 | 1673 | CarSat1 | red | na |
| chrUn | 47028984 | 47029695 | 712  | CarSat1 | red | na |
| chrUn | 47029719 | 47032642 | 2924 | CarSat1 | red | na |
| chrUn | 47032666 | 47033622 | 957  | CarSat1 | red | na |
| chrUn | 47033649 | 47034856 | 1208 | CarSat1 | red | na |
| chrUn | 47034872 | 47035832 | 961  | CarSat1 | red | na |
| chrUn | 47035859 | 47036570 | 712  | CarSat1 | red | na |
| chrUn | 47036597 | 47037576 | 980  | CarSat1 | red | na |
| chrUn | 47037606 | 47038540 | 935  | CarSat1 | red | na |
| chrUn | 47038556 | 47039266 | 711  | CarSat1 | red | na |
| chrUn | 47040279 | 47041618 | 1340 | CarSat1 | red | na |
| chrUn | 47046622 | 47047183 | 562  | CarSat1 | red | na |
| chrUn | 47047208 | 47048206 | 999  | CarSat1 | red | na |
| chrUn | 47048605 | 47049045 | 441  | CarSat1 | red | na |
| chrUn | 47049072 | 47049541 | 470  | CarSat1 | red | na |
| chrUn | 47049557 | 47050283 | 727  | CarSat1 | red | na |
| chrUn | 47050299 | 47051001 | 703  | CarSat1 | red | na |
| chrUn | 47051376 | 47052085 | 710  | CarSat1 | red | na |
| chrUn | 47052112 | 47053296 | 1185 | CarSat1 | red | na |
| chrUn | 47054304 | 47054794 | 491  | CarSat1 | red | na |
| chrUn | 47054821 | 47057569 | 2749 | CarSat1 | red | na |
| chrUn | 47057599 | 47058523 | 925  | CarSat1 | red | na |
| chrUn | 47058549 | 47059043 | 495  | CarSat1 | red | na |
| chrUn | 47059073 | 47060421 | 1349 | CarSat1 | red | na |
| chrUn | 47060791 | 47062236 | 1446 | CarSat1 | red | na |
| chrUn | 47062248 | 47062362 | 115  | CarSat1 | red | na |
| chrUn | 47062544 | 47064412 | 1869 | CarSat1 | red | na |
| chrUn | 47064439 | 47065150 | 712  | CarSat1 | red | na |
| chrUn | 47065177 | 47065646 | 470  | CarSat1 | red | na |
| chrUn | 47065662 | 47066998 | 1337 | CarSat1 | red | na |
| chrUn | 47067312 | 47068129 | 818  | CarSat1 | red | na |
| chrUn | 47068156 | 47070549 | 2394 | CarSat1 | red | na |
| chrUn | 47071077 | 47072341 | 1265 | CarSat1 | red | na |
| chrUn | 47072755 | 47073915 | 1161 | CarSat1 | red | na |
| chrUn | 47078718 | 47080661 | 1944 | CarSat1 | red | na |

|       |          |          |      |         |      |    |
|-------|----------|----------|------|---------|------|----|
| chrUn | 47080677 | 47082506 | 1830 | CarSat1 | red  | na |
| chrUn | 47083684 | 47085138 | 1455 | CarSat1 | red  | na |
| chrUn | 47085737 | 47087122 | 1386 | CarSat1 | red  | na |
| chrUn | 47087152 | 47088256 | 1105 | CarSat1 | red  | na |
| chrUn | 47089335 | 47090732 | 1398 | CarSat1 | red  | na |
| chrUn | 47094294 | 47095397 | 1104 | CarSat1 | red  | na |
| chrUn | 47096870 | 47097383 | 514  | CarSat1 | red  | na |
| chrUn | 47097410 | 47097878 | 469  | CarSat1 | red  | na |
| chrUn | 47097894 | 47098662 | 769  | CarSat1 | red  | na |
| chrUn | 47099667 | 47100726 | 1060 | SAT1_CF | blue | na |
| chrUn | 47100805 | 47106592 | 5788 | SAT1_CF | blue | na |
| chrUn | 47106634 | 47106799 | 166  | SAT1_CF | blue | na |
| chrUn | 47106981 | 47107165 | 185  | SAT1_CF | blue | na |
| chrUn | 47107202 | 47107702 | 501  | SAT1_CF | blue | na |
| chrUn | 47107720 | 47107823 | 104  | SAT1_CF | blue | na |
| chrUn | 47107843 | 47108389 | 547  | SAT1_CF | blue | na |
| chrUn | 47108409 | 47110217 | 1809 | SAT1_CF | blue | na |
| chrUn | 47110230 | 47110632 | 403  | SAT1_CF | blue | na |
| chrUn | 47110672 | 47111174 | 503  | SAT1_CF | blue | na |
| chrUn | 47111187 | 47114063 | 2877 | SAT1_CF | blue | na |
| chrUn | 47114087 | 47114177 | 91   | SAT1_CF | blue | na |
| chrUn | 47114204 | 47114725 | 522  | SAT1_CF | blue | na |
| chrUn | 47114793 | 47115987 | 1195 | SAT1_CF | blue | na |
| chrUn | 47115999 | 47116681 | 683  | SAT1_CF | blue | na |
| chrUn | 47116694 | 47117239 | 546  | SAT1_CF | blue | na |
| chrUn | 47117252 | 47118265 | 1014 | SAT1_CF | blue | na |
| chrUn | 47118344 | 47119735 | 1392 | SAT1_CF | blue | na |
| chrUn | 47119753 | 47120256 | 504  | SAT1_CF | blue | na |
| chrUn | 47120308 | 47122236 | 1929 | SAT1_CF | blue | na |
| chrUn | 47122248 | 47123444 | 1197 | SAT1_CF | blue | na |
| chrUn | 47123480 | 47123667 | 188  | SAT1_CF | blue | na |
| chrUn | 47123849 | 47124683 | 835  | SAT1_CF | blue | na |
| chrUn | 47124695 | 47125327 | 633  | SAT1_CF | blue | na |
| chrUn | 47125349 | 47125456 | 108  | SAT1_CF | blue | na |
| chrUn | 47125470 | 47125971 | 502  | SAT1_CF | blue | na |
| chrUn | 47126011 | 47126411 | 401  | SAT1_CF | blue | na |
| chrUn | 47126445 | 47126711 | 267  | SAT1_CF | blue | na |
| chrUn | 47126791 | 47127354 | 564  | SAT1_CF | blue | na |
| chrUn | 47127381 | 47128013 | 633  | SAT1_CF | blue | na |
| chrUn | 47128056 | 47129505 | 1450 | SAT1_CF | blue | na |
| chrUn | 47129525 | 47130654 | 1130 | SAT1_CF | blue | na |
| chrUn | 47130675 | 47132162 | 1488 | SAT1_CF | blue | na |

|       |          |          |              |      |    |
|-------|----------|----------|--------------|------|----|
| chrUn | 47132177 | 47134202 | 2026 SAT1_CF | blue | na |
| chrUn | 47134215 | 47134715 | 501 SAT1_CF  | blue | na |
| chrUn | 47134802 | 47135361 | 560 SAT1_CF  | blue | na |
| chrUn | 47135389 | 47137045 | 1657 SAT1_CF | blue | na |
| chrUn | 47163597 | 47164384 | 788 Sat7CF   | lime | na |
| chrUn | 47191346 | 47191761 | 416 SAT1_CF  | blue | na |
| chrUn | 47191773 | 47192824 | 1052 SAT1_CF | blue | na |
| chrUn | 47195517 | 47196245 | 729 SAT1_CF  | blue | na |
| chrUn | 47196312 | 47196576 | 265 SAT1_CF  | blue | na |
| chrUn | 47196619 | 47197201 | 583 SAT1_CF  | blue | na |
| chrUn | 47200396 | 47201449 | 1054 SAT1_CF | blue | na |
| chrUn | 47203255 | 47203572 | 318 SAT1_CF  | blue | na |
| chrUn | 47203619 | 47204163 | 545 SAT1_CF  | blue | na |
| chrUn | 47204177 | 47204990 | 814 SAT1_CF  | blue | na |
| chrUn | 47205002 | 47205987 | 986 SAT1_CF  | blue | na |
| chrUn | 47206008 | 47206966 | 959 SAT1_CF  | blue | na |
| chrUn | 47206991 | 47207243 | 253 SAT1_CF  | blue | na |
| chrUn | 47208488 | 47210224 | 1737 SAT1_CF | blue | na |
| chrUn | 47211822 | 47212420 | 599 SAT1_CF  | blue | na |
| chrUn | 47212485 | 47213779 | 1295 SAT1_CF | blue | na |
| chrUn | 47213821 | 47214682 | 862 SAT1_CF  | blue | na |
| chrUn | 47216270 | 47218021 | 1752 SAT1_CF | blue | na |
| chrUn | 47371174 | 47371928 | 755 SAT1_CF  | blue | na |
| chrUn | 47372016 | 47372517 | 502 SAT1_CF  | blue | na |
| chrUn | 47372535 | 47373085 | 551 SAT1_CF  | blue | na |
| chrUn | 47374865 | 47375172 | 308 SAT1_CF  | blue | na |
| chrUn | 47375225 | 47375725 | 501 SAT1_CF  | blue | na |
| chrUn | 47375747 | 47376102 | 356 SAT1_CF  | blue | na |
| chrUn | 47377642 | 47378041 | 400 SAT1_CF  | blue | na |
| chrUn | 47378053 | 47379224 | 1172 SAT1_CF | blue | na |
| chrUn | 47379238 | 47380453 | 1216 SAT1_CF | blue | na |
| chrUn | 47380466 | 47381034 | 569 SAT1_CF  | blue | na |
| chrUn | 47383180 | 47383714 | 535 SAT1_CF  | blue | na |
| chrUn | 47383726 | 47384338 | 613 SAT1_CF  | blue | na |
| chrUn | 47384468 | 47384980 | 513 SAT1_CF  | blue | na |
| chrUn | 47385008 | 47385247 | 240 SAT1_CF  | blue | na |
| chrUn | 47385374 | 47385863 | 490 SAT1_CF  | blue | na |
| chrUn | 47385942 | 47386450 | 509 SAT1_CF  | blue | na |
| chrUn | 47386464 | 47386861 | 398 SAT1_CF  | blue | na |
| chrUn | 47386925 | 47387406 | 482 SAT1_CF  | blue | na |
| chrUn | 47387419 | 47388100 | 682 SAT1_CF  | blue | na |
| chrUn | 47388112 | 47388962 | 851 SAT1_CF  | blue | na |

|       |          |          |              |      |    |
|-------|----------|----------|--------------|------|----|
| chrUn | 47389178 | 47389722 | 545 SAT1_CF  | blue | na |
| chrUn | 47389773 | 47390175 | 403 SAT1_CF  | blue | na |
| chrUn | 47390214 | 47391126 | 913 SAT1_CF  | blue | na |
| chrUn | 47391139 | 47391822 | 684 SAT1_CF  | blue | na |
| chrUn | 47391834 | 47392201 | 368 SAT1_CF  | blue | na |
| chrUn | 47392513 | 47392778 | 266 SAT1_CF  | blue | na |
| chrUn | 47392856 | 47394499 | 1644 SAT1_CF | blue | na |
| chrUn | 47400496 | 47401891 | 1396 SAT1_CF | blue | na |
| chrUn | 47401933 | 47402458 | 526 SAT1_CF  | blue | na |
| chrUn | 47404370 | 47404671 | 302 SAT1_CF  | blue | na |
| chrUn | 47404793 | 47405138 | 346 SAT1_CF  | blue | na |
| chrUn | 47405168 | 47405722 | 555 SAT1_CF  | blue | na |
| chrUn | 47405733 | 47407033 | 1301 SAT1_CF | blue | na |
| chrUn | 47407076 | 47408038 | 963 SAT1_CF  | blue | na |
| chrUn | 47408117 | 47408666 | 550 SAT1_CF  | blue | na |
| chrUn | 47408745 | 47409282 | 538 SAT1_CF  | blue | na |
| chrUn | 47409295 | 47409797 | 503 SAT1_CF  | blue | na |
| chrUn | 47409810 | 47410571 | 762 SAT1_CF  | blue | na |
| chrUn | 47410583 | 47411847 | 1265 SAT1_CF | blue | na |
| chrUn | 47411897 | 47412441 | 545 SAT1_CF  | blue | na |
| chrUn | 47412485 | 47414037 | 1553 SAT1_CF | blue | na |
| chrUn | 47415133 | 47416838 | 1706 SAT1_CF | blue | na |
| chrUn | 47416893 | 47417842 | 950 SAT1_CF  | blue | na |
| chrUn | 47417861 | 47418380 | 520 SAT1_CF  | blue | na |
| chrUn | 47418393 | 47419076 | 684 SAT1_CF  | blue | na |
| chrUn | 47419088 | 47419197 | 110 SAT1_CF  | blue | na |
| chrUn | 47419218 | 47419847 | 630 SAT1_CF  | blue | na |
| chrUn | 47419861 | 47420534 | 674 SAT1_CF  | blue | na |
| chrUn | 47420577 | 47421118 | 542 SAT1_CF  | blue | na |
| chrUn | 47459974 | 47460689 | 716 CarSat1  | red  | na |
| chrUn | 47460710 | 47462405 | 1696 CarSat1 | red  | na |
| chrUn | 47462430 | 47462898 | 469 CarSat1  | red  | na |
| chrUn | 47462919 | 47464615 | 1697 CarSat1 | red  | na |
| chrUn | 47464649 | 47465846 | 1198 CarSat1 | red  | na |
| chrUn | 47465867 | 47466583 | 717 CarSat1  | red  | na |
| chrUn | 47466604 | 47468056 | 1453 CarSat1 | red  | na |
| chrUn | 47468077 | 47469032 | 956 CarSat1  | red  | na |
| chrUn | 47469057 | 47470722 | 1666 CarSat1 | red  | na |
| chrUn | 47470759 | 47471244 | 486 CarSat1  | red  | na |
| chrUn | 47471278 | 47471980 | 703 CarSat1  | red  | na |
| chrUn | 47472005 | 47472715 | 711 CarSat1  | red  | na |
| chrUn | 47472740 | 47473461 | 722 CarSat1  | red  | na |



|       |          |          |      |         |        |    |
|-------|----------|----------|------|---------|--------|----|
| chrUn | 47473486 | 47474060 | 575  | CarSat1 | red    | na |
| chrUn | 47475775 | 47476403 | 629  | CarSat1 | red    | na |
| chrUn | 47476428 | 47477512 | 1085 | CarSat1 | red    | na |
| chrUn | 47502932 | 47504984 | 2053 | CarSat1 | red    | na |
| chrUn | 47505011 | 47508430 | 3420 | CarSat1 | red    | na |
| chrUn | 47508457 | 47509418 | 962  | CarSat1 | red    | na |
| chrUn | 47509434 | 47511847 | 2414 | CarSat1 | red    | na |
| chrUn | 47511877 | 47513321 | 1445 | CarSat1 | red    | na |
| chrUn | 47513351 | 47515805 | 2455 | CarSat1 | red    | na |
| chrUn | 47515827 | 47517010 | 1184 | CarSat1 | red    | na |
| chrUn | 47517025 | 47517152 | 128  | Carsat2 | orange | na |
| chrUn | 47517040 | 47519490 | 2451 | CarSat1 | red    | na |
| chrUn | 47519511 | 47522904 | 3394 | CarSat1 | red    | na |
| chrUn | 47522920 | 47523046 | 127  | Carsat2 | orange | na |
| chrUn | 47522934 | 47523711 | 778  | CarSat1 | red    | na |
| chrUn | 47524711 | 47525197 | 487  | SAT1_CF | blue   | na |
| chrUn | 47525209 | 47526051 | 843  | SAT1_CF | blue   | na |
| chrUn | 47528049 | 47528547 | 499  | SAT1_CF | blue   | na |
| chrUn | 47528566 | 47529118 | 553  | SAT1_CF | blue   | na |
| chrUn | 47529161 | 47529744 | 584  | SAT1_CF | blue   | na |
| chrUn | 47531163 | 47531600 | 438  | SAT1_CF | blue   | na |
| chrUn | 47531625 | 47532502 | 878  | SAT1_CF | blue   | na |
| chrUn | 47532515 | 47533063 | 549  | SAT1_CF | blue   | na |
| chrUn | 47533083 | 47533748 | 666  | SAT1_CF | blue   | na |
| chrUn | 47533791 | 47535413 | 1623 | SAT1_CF | blue   | na |
| chrUn | 47535427 | 47535893 | 467  | SAT1_CF | blue   | na |
| chrUn | 47536656 | 47537210 | 555  | SAT1_CF | blue   | na |
| chrUn | 47537223 | 47537294 | 72   | SAT1_CF | blue   | na |
| chrUn | 47537317 | 47537867 | 551  | SAT1_CF | blue   | na |
| chrUn | 47537885 | 47538424 | 540  | SAT1_CF | blue   | na |
| chrUn | 47539925 | 47540698 | 774  | SAT1_CF | blue   | na |
| chrUn | 47540715 | 47541355 | 641  | SAT1_CF | blue   | na |
| chrUn | 47543340 | 47543960 | 621  | SAT1_CF | blue   | na |
| chrUn | 47544002 | 47544982 | 981  | SAT1_CF | blue   | na |
| chrUn | 47545026 | 47545160 | 135  | SAT1_CF | blue   | na |
| chrUn | 47545172 | 47545712 | 541  | SAT1_CF | blue   | na |
| chrUn | 47545724 | 47546041 | 318  | SAT1_CF | blue   | na |
| chrUn | 47546116 | 47546686 | 571  | SAT1_CF | blue   | na |
| chrUn | 47546705 | 47547257 | 553  | SAT1_CF | blue   | na |
| chrUn | 47547306 | 47547629 | 324  | SAT1_CF | blue   | na |
| chrUn | 47547877 | 47548188 | 312  | SAT1_CF | blue   | na |
| chrUn | 47548215 | 47548962 | 748  | SAT1_CF | blue   | na |

|       |          |          |              |      |    |
|-------|----------|----------|--------------|------|----|
| chrUn | 47548982 | 47549047 | 66 SAT1_CF   | blue | na |
| chrUn | 47549069 | 47549593 | 525 SAT1_CF  | blue | na |
| chrUn | 47549650 | 47550762 | 1113 SAT1_CF | blue | na |
| chrUn | 47553707 | 47554954 | 1248 SAT1_CF | blue | na |
| chrUn | 47555721 | 47555797 | 77 SAT1_CF   | blue | na |
| chrUn | 47555843 | 47556344 | 502 SAT1_CF  | blue | na |
| chrUn | 47556357 | 47557935 | 1579 SAT1_CF | blue | na |
| chrUn | 47558159 | 47558297 | 139 SAT1_CF  | blue | na |
| chrUn | 47558316 | 47558821 | 506 SAT1_CF  | blue | na |
| chrUn | 47558864 | 47559270 | 407 SAT1_CF  | blue | na |
| chrUn | 47561059 | 47562660 | 1602 SAT1_CF | blue | na |
| chrUn | 47564360 | 47564858 | 499 SAT1_CF  | blue | na |
| chrUn | 47564871 | 47565632 | 762 SAT1_CF  | blue | na |
| chrUn | 47565652 | 47565717 | 66 SAT1_CF   | blue | na |
| chrUn | 47565739 | 47566529 | 791 SAT1_CF  | blue | na |
| chrUn | 47568890 | 47569675 | 786 SAT1_CF  | blue | na |
| chrUn | 47569720 | 47570884 | 1165 SAT1_CF | blue | na |
| chrUn | 47571002 | 47571609 | 608 SAT1_CF  | blue | na |
| chrUn | 47571620 | 47572097 | 478 SAT1_CF  | blue | na |
| chrUn | 47574369 | 47574935 | 567 SAT1_CF  | blue | na |
| chrUn | 47574979 | 47575990 | 1012 SAT1_CF | blue | na |
| chrUn | 47576149 | 47576224 | 76 SAT1_CF   | blue | na |
| chrUn | 47576263 | 47576764 | 502 SAT1_CF  | blue | na |
| chrUn | 47576776 | 47576885 | 110 SAT1_CF  | blue | na |
| chrUn | 47576906 | 47578013 | 1108 SAT1_CF | blue | na |
| chrUn | 47578035 | 47578403 | 369 SAT1_CF  | blue | na |
| chrUn | 47578429 | 47580345 | 1917 SAT1_CF | blue | na |
| chrUn | 47580372 | 47581163 | 792 SAT1_CF  | blue | na |
| chrUn | 47591134 | 47591897 | 764 SAT1_CF  | blue | na |
| chrUn | 47591919 | 47592817 | 899 SAT1_CF  | blue | na |
| chrUn | 47592845 | 47593352 | 508 SAT1_CF  | blue | na |
| chrUn | 47593396 | 47593957 | 562 SAT1_CF  | blue | na |
| chrUn | 47594000 | 47594805 | 806 SAT1_CF  | blue | na |
| chrUn | 47594848 | 47596299 | 1452 SAT1_CF | blue | na |
| chrUn | 47596484 | 47596950 | 467 SAT1_CF  | blue | na |
| chrUn | 47596965 | 47597122 | 158 SAT1_CF  | blue | na |
| chrUn | 47597167 | 47597667 | 501 SAT1_CF  | blue | na |
| chrUn | 47597680 | 47599779 | 2100 SAT1_CF | blue | na |
| chrUn | 47599842 | 47600313 | 472 SAT1_CF  | blue | na |
| chrUn | 47600333 | 47601016 | 684 SAT1_CF  | blue | na |
| chrUn | 47601028 | 47601704 | 677 SAT1_CF  | blue | na |
| chrUn | 47601747 | 47602579 | 833 SAT1_CF  | blue | na |

|       |          |          |      |         |      |    |
|-------|----------|----------|------|---------|------|----|
| chrUn | 47602629 | 47603190 | 562  | SAT1_CF | blue | na |
| chrUn | 47604571 | 47605097 | 527  | SAT1_CF | blue | na |
| chrUn | 47605166 | 47606248 | 1083 | SAT1_CF | blue | na |
| chrUn | 47606263 | 47606420 | 158  | SAT1_CF | blue | na |
| chrUn | 47606446 | 47607055 | 610  | SAT1_CF | blue | na |
| chrUn | 47607074 | 47608395 | 1322 | SAT1_CF | blue | na |
| chrUn | 47608422 | 47610170 | 1749 | SAT1_CF | blue | na |
| chrUn | 47610190 | 47610863 | 674  | SAT1_CF | blue | na |
| chrUn | 47610943 | 47611571 | 629  | SAT1_CF | blue | na |
| chrUn | 47611583 | 47614481 | 2899 | SAT1_CF | blue | na |
| chrUn | 47619979 | 47620640 | 662  | SAT1_CF | blue | na |
| chrUn | 47620658 | 47621160 | 503  | SAT1_CF | blue | na |
| chrUn | 47621226 | 47621361 | 136  | SAT1_CF | blue | na |
| chrUn | 47621389 | 47622575 | 1187 | SAT1_CF | blue | na |
| chrUn | 47622620 | 47623952 | 1333 | SAT1_CF | blue | na |
| chrUn | 47623964 | 47624516 | 553  | SAT1_CF | blue | na |
| chrUn | 47624623 | 47625385 | 763  | SAT1_CF | blue | na |
| chrUn | 47625397 | 47625971 | 575  | SAT1_CF | blue | na |
| chrUn | 47625994 | 47626100 | 107  | SAT1_CF | blue | na |
| chrUn | 47626113 | 47626657 | 545  | SAT1_CF | blue | na |
| chrUn | 47626734 | 47628447 | 1714 | SAT1_CF | blue | na |
| chrUn | 47628489 | 47628663 | 175  | SAT1_CF | blue | na |
| chrUn | 47628675 | 47629549 | 875  | SAT1_CF | blue | na |
| chrUn | 47629574 | 47630115 | 542  | SAT1_CF | blue | na |
| chrUn | 47630212 | 47630889 | 678  | SAT1_CF | blue | na |
| chrUn | 47630901 | 47631456 | 556  | SAT1_CF | blue | na |
| chrUn | 47631477 | 47631576 | 100  | SAT1_CF | blue | na |
| chrUn | 47631598 | 47632173 | 576  | SAT1_CF | blue | na |
| chrUn | 47632501 | 47633651 | 1151 | SAT1_CF | blue | na |
| chrUn | 47633664 | 47634144 | 481  | SAT1_CF | blue | na |
| chrUn | 47634217 | 47635134 | 918  | SAT1_CF | blue | na |
| chrUn | 47635183 | 47635730 | 548  | SAT1_CF | blue | na |
| chrUn | 47635751 | 47635860 | 110  | SAT1_CF | blue | na |
| chrUn | 47635872 | 47636245 | 374  | SAT1_CF | blue | na |
| chrUn | 47636273 | 47636989 | 717  | SAT1_CF | blue | na |
| chrUn | 47637001 | 47638651 | 1651 | SAT1_CF | blue | na |
| chrUn | 47638669 | 47639429 | 761  | SAT1_CF | blue | na |
| chrUn | 47639442 | 47640449 | 1008 | SAT1_CF | blue | na |
| chrUn | 47640473 | 47641019 | 547  | SAT1_CF | blue | na |
| chrUn | 47641063 | 47641212 | 150  | SAT1_CF | blue | na |
| chrUn | 47641397 | 47642229 | 833  | SAT1_CF | blue | na |
| chrUn | 47642272 | 47642819 | 548  | SAT1_CF | blue | na |

|       |          |          |              |      |    |
|-------|----------|----------|--------------|------|----|
| chrUn | 47642840 | 47642949 | 110 SAT1_CF  | blue | na |
| chrUn | 47642961 | 47643334 | 374 SAT1_CF  | blue | na |
| chrUn | 47643362 | 47644080 | 719 SAT1_CF  | blue | na |
| chrUn | 47644092 | 47644852 | 761 SAT1_CF  | blue | na |
| chrUn | 47644866 | 47645365 | 500 SAT1_CF  | blue | na |
| chrUn | 47645452 | 47645950 | 499 SAT1_CF  | blue | na |
| chrUn | 47645968 | 47646526 | 559 SAT1_CF  | blue | na |
| chrUn | 47646548 | 47646655 | 108 SAT1_CF  | blue | na |
| chrUn | 47646668 | 47647213 | 546 SAT1_CF  | blue | na |
| chrUn | 47647315 | 47647803 | 489 SAT1_CF  | blue | na |
| chrUn | 47648022 | 47648206 | 185 SAT1_CF  | blue | na |
| chrUn | 47648220 | 47649665 | 1446 SAT1_CF | blue | na |
| chrUn | 47649707 | 47649877 | 171 SAT1_CF  | blue | na |
| chrUn | 47649890 | 47651131 | 1242 SAT1_CF | blue | na |
| chrUn | 47651153 | 47651260 | 108 SAT1_CF  | blue | na |
| chrUn | 47651273 | 47651976 | 704 SAT1_CF  | blue | na |
| chrUn | 47651991 | 47652515 | 525 SAT1_CF  | blue | na |
| chrUn | 47652558 | 47653830 | 1273 SAT1_CF | blue | na |
| chrUn | 47653879 | 47654424 | 546 SAT1_CF  | blue | na |
| chrUn | 47654437 | 47654553 | 117 SAT1_CF  | blue | na |
| chrUn | 47654565 | 47655118 | 554 SAT1_CF  | blue | na |
| chrUn | 47655139 | 47655236 | 98 SAT1_CF   | blue | na |
| chrUn | 47655259 | 47655760 | 502 SAT1_CF  | blue | na |
| chrUn | 47655826 | 47655962 | 137 SAT1_CF  | blue | na |
| chrUn | 47655990 | 47656538 | 549 SAT1_CF  | blue | na |
| chrUn | 47656568 | 47656847 | 280 SAT1_CF  | blue | na |
| chrUn | 47657893 | 47659945 | 2053 SAT1_CF | blue | na |
| chrUn | 47659958 | 47660574 | 617 SAT1_CF  | blue | na |
| chrUn | 47660616 | 47661285 | 670 SAT1_CF  | blue | na |
| chrUn | 47661466 | 47661862 | 397 SAT1_CF  | blue | na |
| chrUn | 47661895 | 47662031 | 137 SAT1_CF  | blue | na |
| chrUn | 47662126 | 47662645 | 520 SAT1_CF  | blue | na |
| chrUn | 47662702 | 47663249 | 548 SAT1_CF  | blue | na |
| chrUn | 47663291 | 47664916 | 1626 SAT1_CF | blue | na |
| chrUn | 47664928 | 47666169 | 1242 SAT1_CF | blue | na |
| chrUn | 47666250 | 47666424 | 175 SAT1_CF  | blue | na |
| chrUn | 47666510 | 47667005 | 496 SAT1_CF  | blue | na |
| chrUn | 47667025 | 47667901 | 877 SAT1_CF  | blue | na |
| chrUn | 47667934 | 47668455 | 522 SAT1_CF  | blue | na |
| chrUn | 47668470 | 47668626 | 157 SAT1_CF  | blue | na |
| chrUn | 47668652 | 47669172 | 521 SAT1_CF  | blue | na |
| chrUn | 47669198 | 47671351 | 2154 SAT1_CF | blue | na |

|       |          |          |              |      |    |
|-------|----------|----------|--------------|------|----|
| chrUn | 47671375 | 47671511 | 137 SAT1_CF  | blue | na |
| chrUn | 47671579 | 47672079 | 501 SAT1_CF  | blue | na |
| chrUn | 47672092 | 47673463 | 1372 SAT1_CF | blue | na |
| chrUn | 47673506 | 47674819 | 1314 SAT1_CF | blue | na |
| chrUn | 47674868 | 47676493 | 1626 SAT1_CF | blue | na |
| chrUn | 47676574 | 47677683 | 1110 SAT1_CF | blue | na |
| chrUn | 47677736 | 47678236 | 501 SAT1_CF  | blue | na |
| chrUn | 47678249 | 47678932 | 684 SAT1_CF  | blue | na |
| chrUn | 47678944 | 47679739 | 796 SAT1_CF  | blue | na |
| chrUn | 47679750 | 47680283 | 534 SAT1_CF  | blue | na |
| chrUn | 47680296 | 47681781 | 1486 SAT1_CF | blue | na |
| chrUn | 47681793 | 47682608 | 816 SAT1_CF  | blue | na |
| chrUn | 47683554 | 47684049 | 496 SAT1_CF  | blue | na |
| chrUn | 47684070 | 47684589 | 520 SAT1_CF  | blue | na |
| chrUn | 47684602 | 47684684 | 83 SAT1_CF   | blue | na |
| chrUn | 47684734 | 47686018 | 1285 SAT1_CF | blue | na |
| chrUn | 47686070 | 47686611 | 542 SAT1_CF  | blue | na |
| chrUn | 47686655 | 47686961 | 307 SAT1_CF  | blue | na |
| chrUn | 47687041 | 47687547 | 507 SAT1_CF  | blue | na |
| chrUn | 47687560 | 47690140 | 2581 SAT1_CF | blue | na |
| chrUn | 47690182 | 47690963 | 782 SAT1_CF  | blue | na |
| chrUn | 47691042 | 47691551 | 510 SAT1_CF  | blue | na |
| chrUn | 47691564 | 47691919 | 356 SAT1_CF  | blue | na |
| chrUn | 47692006 | 47692507 | 502 SAT1_CF  | blue | na |
| chrUn | 47692521 | 47693194 | 674 SAT1_CF  | blue | na |
| chrUn | 47693242 | 47695181 | 1940 SAT1_CF | blue | na |
| chrUn | 47696182 | 47697686 | 1505 SAT1_CF | blue | na |
| chrUn | 47697714 | 47697870 | 157 SAT1_CF  | blue | na |
| chrUn | 47697915 | 47698515 | 601 SAT1_CF  | blue | na |
| chrUn | 47698539 | 47699083 | 545 SAT1_CF  | blue | na |
| chrUn | 47699127 | 47699670 | 544 SAT1_CF  | blue | na |
| chrUn | 47699697 | 47700374 | 678 SAT1_CF  | blue | na |
| chrUn | 47700386 | 47701236 | 851 SAT1_CF  | blue | na |
| chrUn | 47701249 | 47701946 | 698 SAT1_CF  | blue | na |
| chrUn | 47701987 | 47702730 | 744 SAT1_CF  | blue | na |
| chrUn | 47702747 | 47703095 | 349 SAT1_CF  | blue | na |
| chrUn | 47703211 | 47703728 | 518 SAT1_CF  | blue | na |
| chrUn | 47703787 | 47704332 | 546 SAT1_CF  | blue | na |
| chrUn | 47704374 | 47705100 | 727 SAT1_CF  | blue | na |
| chrUn | 47705145 | 47705680 | 536 SAT1_CF  | blue | na |
| chrUn | 47705702 | 47706220 | 519 SAT1_CF  | blue | na |
| chrUn | 47706232 | 47707549 | 1318 SAT1_CF | blue | na |

|       |          |          |              |      |    |
|-------|----------|----------|--------------|------|----|
| chrUn | 47707562 | 47708397 | 836 SAT1_CF  | blue | na |
| chrUn | 47708410 | 47709170 | 761 SAT1_CF  | blue | na |
| chrUn | 47709183 | 47710512 | 1330 SAT1_CF | blue | na |
| chrUn | 47710555 | 47712181 | 1627 SAT1_CF | blue | na |
| chrUn | 47712194 | 47712549 | 356 SAT1_CF  | blue | na |
| chrUn | 47712617 | 47713135 | 519 SAT1_CF  | blue | na |
| chrUn | 47713153 | 47713831 | 679 SAT1_CF  | blue | na |
| chrUn | 47713843 | 47714688 | 846 SAT1_CF  | blue | na |
| chrUn | 47714757 | 47715270 | 514 SAT1_CF  | blue | na |
| chrUn | 47715308 | 47716167 | 860 SAT1_CF  | blue | na |
| chrUn | 47716214 | 47716587 | 374 SAT1_CF  | blue | na |
| chrUn | 47716604 | 47717120 | 517 SAT1_CF  | blue | na |
| chrUn | 47717133 | 47717816 | 684 SAT1_CF  | blue | na |
| chrUn | 47717828 | 47718686 | 859 SAT1_CF  | blue | na |
| chrUn | 47718728 | 47719516 | 789 SAT1_CF  | blue | na |
| chrUn | 47719696 | 47719864 | 169 SAT1_CF  | blue | na |
| chrUn | 47719937 | 47720417 | 481 SAT1_CF  | blue | na |
| chrUn | 47720430 | 47720535 | 106 SAT1_CF  | blue | na |
| chrUn | 47720558 | 47722253 | 1696 SAT1_CF | blue | na |
| chrUn | 47722267 | 47723338 | 1072 SAT1_CF | blue | na |
| chrUn | 47723350 | 47724033 | 684 SAT1_CF  | blue | na |
| chrUn | 47724045 | 47724973 | 929 SAT1_CF  | blue | na |
| chrUn | 47724986 | 47725058 | 73 SAT1_CF   | blue | na |
| chrUn | 47725080 | 47725632 | 553 SAT1_CF  | blue | na |
| chrUn | 47725644 | 47726890 | 1247 SAT1_CF | blue | na |
| chrUn | 47726971 | 47727174 | 204 SAT1_CF  | blue | na |
| chrUn | 47727231 | 47727732 | 502 SAT1_CF  | blue | na |
| chrUn | 47727745 | 47728420 | 676 SAT1_CF  | blue | na |
| chrUn | 47728517 | 47729059 | 543 SAT1_CF  | blue | na |
| chrUn | 47729103 | 47730068 | 966 SAT1_CF  | blue | na |
| chrUn | 47730083 | 47730436 | 354 SAT1_CF  | blue | na |
| chrUn | 47730542 | 47732015 | 1474 SAT1_CF | blue | na |
| chrUn | 47732062 | 47732583 | 522 SAT1_CF  | blue | na |
| chrUn | 47733610 | 47735479 | 1870 SAT1_CF | blue | na |
| chrUn | 47735529 | 47736379 | 851 SAT1_CF  | blue | na |
| chrUn | 47736444 | 47736988 | 545 SAT1_CF  | blue | na |
| chrUn | 47737030 | 47737808 | 779 SAT1_CF  | blue | na |
| chrUn | 47737820 | 47739484 | 1665 SAT1_CF | blue | na |
| chrUn | 47739562 | 47740069 | 508 SAT1_CF  | blue | na |
| chrUn | 47740083 | 47740485 | 403 SAT1_CF  | blue | na |
| chrUn | 47740525 | 47741025 | 501 SAT1_CF  | blue | na |
| chrUn | 47741039 | 47741146 | 108 SAT1_CF  | blue | na |

|       |          |          |              |        |    |
|-------|----------|----------|--------------|--------|----|
| chrUn | 47741168 | 47741720 | 553 SAT1_CF  | blue   | na |
| chrUn | 47741732 | 47742416 | 685 SAT1_CF  | blue   | na |
| chrUn | 47742428 | 47743103 | 676 SAT1_CF  | blue   | na |
| chrUn | 47743148 | 47743689 | 542 SAT1_CF  | blue   | na |
| chrUn | 47743711 | 47744393 | 683 SAT1_CF  | blue   | na |
| chrUn | 47744405 | 47745884 | 1480 SAT1_CF | blue   | na |
| chrUn | 47745926 | 47746484 | 559 SAT1_CF  | blue   | na |
| chrUn | 47746532 | 47747074 | 543 SAT1_CF  | blue   | na |
| chrUn | 47747088 | 47748573 | 1486 SAT1_CF | blue   | na |
| chrUn | 47748615 | 47749112 | 498 SAT1_CF  | blue   | na |
| chrUn | 47749130 | 47749886 | 757 SAT1_CF  | blue   | na |
| chrUn | 47749899 | 47751401 | 1503 SAT1_CF | blue   | na |
| chrUn | 47751437 | 47751938 | 502 SAT1_CF  | blue   | na |
| chrUn | 47751965 | 47752633 | 669 SAT1_CF  | blue   | na |
| chrUn | 47752675 | 47753526 | 852 SAT1_CF  | blue   | na |
| chrUn | 47753596 | 47755512 | 1917 SAT1_CF | blue   | na |
| chrUn | 47755555 | 47756043 | 489 SAT1_CF  | blue   | na |
| chrUn | 47756095 | 47756231 | 137 SAT1_CF  | blue   | na |
| chrUn | 47756297 | 47756798 | 502 SAT1_CF  | blue   | na |
| chrUn | 47756820 | 47758864 | 2045 SAT1_CF | blue   | na |
| chrUn | 47758897 | 47759603 | 707 SAT1_CF  | blue   | na |
| chrUn | 47759615 | 47761211 | 1597 SAT1_CF | blue   | na |
| chrUn | 47761234 | 47761899 | 666 SAT1_CF  | blue   | na |
| chrUn | 47761942 | 47762898 | 957 SAT1_CF  | blue   | na |
| chrUn | 47762977 | 47763936 | 960 SAT1_CF  | blue   | na |
| chrUn | 47763976 | 47764478 | 503 SAT1_CF  | blue   | na |
| chrUn | 47764491 | 47764597 | 107 SAT1_CF  | blue   | na |
| chrUn | 47764620 | 47765172 | 553 SAT1_CF  | blue   | na |
| chrUn | 47765190 | 47765778 | 589 SAT1_CF  | blue   | na |
| chrUn | 47765790 | 47765873 | 84 SAT1_CF   | blue   | na |
| chrUn | 47765886 | 47767917 | 2032 SAT1_CF | blue   | na |
| chrUn | 47767929 | 47768598 | 670 SAT1_CF  | blue   | na |
| chrUn | 47768640 | 47769271 | 632 SAT1_CF  | blue   | na |
| chrUn | 47769299 | 47769864 | 566 SAT1_CF  | blue   | na |
| chrUn | 47809873 | 47811022 | 1150 Sat2CF  | purple | na |
| chrUn | 47831533 | 47832248 | 716 Sat2CF   | purple | na |
| chrUn | 47851742 | 47852506 | 765 SAT1_CF  | blue   | na |
| chrUn | 47852549 | 47853637 | 1089 SAT1_CF | blue   | na |
| chrUn | 47853628 | 47854864 | 1237 CarSat1 | red    | na |
| chrUn | 47854888 | 47856479 | 1592 CarSat1 | red    | na |
| chrUn | 47856500 | 47857286 | 787 CarSat1  | red    | na |
| chrUn | 47857328 | 47858031 | 704 CarSat1  | red    | na |

|       |          |          |      |         |        |    |
|-------|----------|----------|------|---------|--------|----|
| chrUn | 47858049 | 47858766 | 718  | CarSat1 | red    | na |
| chrUn | 47858789 | 47859565 | 777  | CarSat1 | red    | na |
| chrUn | 47859586 | 47861045 | 1460 | CarSat1 | red    | na |
| chrUn | 47861246 | 47861888 | 643  | CarSat1 | red    | na |
| chrUn | 47884751 | 47885692 | 942  | Sat2CF  | purple | na |
| chrUn | 47884768 | 47885876 | 1109 | Sat2CF  | purple | na |
| chrUn | 47887552 | 47887966 | 415  | CarSat1 | red    | na |
| chrUn | 47888938 | 47889789 | 852  | CarSat1 | red    | na |
| chrUn | 47889810 | 47889952 | 143  | CarSat1 | red    | na |
| chrUn | 47978447 | 47978846 | 400  | SAT1_CF | blue   | na |
| chrUn | 47978886 | 47979388 | 503  | SAT1_CF | blue   | na |
| chrUn | 47979401 | 47980162 | 762  | SAT1_CF | blue   | na |
| chrUn | 47980174 | 47981437 | 1264 | SAT1_CF | blue   | na |
| chrUn | 47981450 | 47981995 | 546  | SAT1_CF | blue   | na |
| chrUn | 47982033 | 47982380 | 348  | SAT1_CF | blue   | na |
| chrUn | 47982422 | 47983007 | 586  | SAT1_CF | blue   | na |
| chrUn | 47983019 | 47984357 | 1339 | SAT1_CF | blue   | na |
| chrUn | 47984370 | 47984872 | 503  | SAT1_CF | blue   | na |
| chrUn | 47984884 | 47985567 | 684  | SAT1_CF | blue   | na |
| chrUn | 47985579 | 47986256 | 678  | SAT1_CF | blue   | na |
| chrUn | 47986353 | 47986893 | 541  | SAT1_CF | blue   | na |
| chrUn | 47986918 | 47987795 | 878  | SAT1_CF | blue   | na |
| chrUn | 47987843 | 47988813 | 971  | SAT1_CF | blue   | na |
| chrUn | 47988892 | 47989436 | 545  | SAT1_CF | blue   | na |
| chrUn | 47989525 | 47990357 | 833  | SAT1_CF | blue   | na |
| chrUn | 47990370 | 47990476 | 107  | SAT1_CF | blue   | na |
| chrUn | 47990499 | 47991475 | 977  | SAT1_CF | blue   | na |
| chrUn | 47991554 | 47992548 | 995  | SAT1_CF | blue   | na |
| chrUn | 47992587 | 47993088 | 502  | SAT1_CF | blue   | na |
| chrUn | 47993101 | 47994455 | 1355 | SAT1_CF | blue   | na |
| chrUn | 47994497 | 47995035 | 539  | SAT1_CF | blue   | na |
| chrUn | 47995081 | 47996919 | 1839 | SAT1_CF | blue   | na |
| chrUn | 47996937 | 47997044 | 108  | SAT1_CF | blue   | na |
| chrUn | 47997061 | 47997496 | 436  | SAT1_CF | blue   | na |
| chrUn | 47997510 | 47997617 | 108  | SAT1_CF | blue   | na |
| chrUn | 47997639 | 47997919 | 281  | SAT1_CF | blue   | na |
| chrUn | 47998102 | 47998381 | 280  | SAT1_CF | blue   | na |
| chrUn | 47998424 | 47999414 | 991  | SAT1_CF | blue   | na |
| chrUn | 47999481 | 48000246 | 766  | SAT1_CF | blue   | na |
| chrUn | 48000293 | 48000814 | 522  | SAT1_CF | blue   | na |
| chrUn | 48000825 | 48001500 | 676  | SAT1_CF | blue   | na |
| chrUn | 48001543 | 48003287 | 1745 | SAT1_CF | blue   | na |



|       |          |          |              |        |    |
|-------|----------|----------|--------------|--------|----|
| chrUn | 48003311 | 48004513 | 1203 SAT1_CF | blue   | na |
| chrUn | 48004556 | 48005867 | 1312 SAT1_CF | blue   | na |
| chrUn | 48005893 | 48006381 | 489 SAT1_CF  | blue   | na |
| chrUn | 48006432 | 48007132 | 701 SAT1_CF  | blue   | na |
| chrUn | 48007145 | 48008520 | 1376 SAT1_CF | blue   | na |
| chrUn | 48008534 | 48008647 | 114 SAT1_CF  | blue   | na |
| chrUn | 48008664 | 48009393 | 730 SAT1_CF  | blue   | na |
| chrUn | 48009435 | 48010134 | 700 SAT1_CF  | blue   | na |
| chrUn | 48010148 | 48010734 | 587 SAT1_CF  | blue   | na |
| chrUn | 48012122 | 48013129 | 1008 SAT1_CF | blue   | na |
| chrUn | 48013152 | 48014124 | 973 SAT1_CF  | blue   | na |
| chrUn | 48015142 | 48021983 | 6842 CarSat1 | red    | na |
| chrUn | 48022976 | 48023266 | 291 Carsat2  | orange | na |
| chrUn | 48023008 | 48024106 | 1099 CarSat1 | red    | na |
| chrUn | 48024136 | 48025577 | 1442 CarSat1 | red    | na |
| chrUn | 48025605 | 48026089 | 485 CarSat1  | red    | na |
| chrUn | 48026113 | 48028300 | 2188 CarSat1 | red    | na |
| chrUn | 48028324 | 48029410 | 1087 CarSat1 | red    | na |
| chrUn | 48042458 | 48045073 | 2616 CarSat1 | red    | na |
| chrUn | 48045097 | 48046037 | 941 CarSat1  | red    | na |
| chrUn | 48046067 | 48046650 | 584 CarSat1  | red    | na |
| chrUn | 48048078 | 48048980 | 903 CarSat1  | red    | na |
| chrUn | 48049010 | 48050234 | 1225 CarSat1 | red    | na |
| chrUn | 48050267 | 48053176 | 2910 CarSat1 | red    | na |
| chrUn | 48053200 | 48055598 | 2399 CarSat1 | red    | na |
| chrUn | 48055619 | 48055746 | 128 Carsat2  | orange | na |
| chrUn | 48055634 | 48056345 | 712 CarSat1  | red    | na |
| chrUn | 48056360 | 48056486 | 127 Carsat2  | orange | na |
| chrUn | 48056375 | 48057080 | 706 CarSat1  | red    | na |
| chrUn | 48057095 | 48057222 | 128 Carsat2  | orange | na |
| chrUn | 48057110 | 48058554 | 1445 CarSat1 | red    | na |
| chrUn | 48058569 | 48058696 | 128 Carsat2  | orange | na |
| chrUn | 48058584 | 48059290 | 707 CarSat1  | red    | na |
| chrUn | 48059305 | 48059431 | 127 Carsat2  | orange | na |
| chrUn | 48059320 | 48060027 | 708 CarSat1  | red    | na |
| chrUn | 48060042 | 48060169 | 128 Carsat2  | orange | na |
| chrUn | 48060057 | 48060764 | 708 CarSat1  | red    | na |
| chrUn | 48060794 | 48061501 | 708 CarSat1  | red    | na |
| chrUn | 48061516 | 48061643 | 128 Carsat2  | orange | na |
| chrUn | 48061531 | 48063711 | 2181 CarSat1 | red    | na |
| chrUn | 48063741 | 48066282 | 2542 CarSat1 | red    | na |
| chrUn | 48077047 | 48078079 | 1033 Sat2CF  | purple | na |

|       |          |          |              |        |    |
|-------|----------|----------|--------------|--------|----|
| chrUn | 48077165 | 48078028 | 864 Sat2CF   | purple | na |
| chrUn | 48103807 | 48105096 | 1290 SAT1_CF | blue   | na |
| chrUn | 48105139 | 48105462 | 324 SAT1_CF  | blue   | na |
| chrUn | 48105492 | 48106005 | 514 SAT1_CF  | blue   | na |
| chrUn | 48106039 | 48106666 | 628 SAT1_CF  | blue   | na |
| chrUn | 48106708 | 48107707 | 1000 SAT1_CF | blue   | na |
| chrUn | 48107751 | 48108668 | 918 SAT1_CF  | blue   | na |
| chrUn | 48108711 | 48109212 | 502 SAT1_CF  | blue   | na |
| chrUn | 48109229 | 48109907 | 679 SAT1_CF  | blue   | na |
| chrUn | 48109920 | 48110029 | 110 SAT1_CF  | blue   | na |
| chrUn | 48110049 | 48112568 | 2520 SAT1_CF | blue   | na |
| chrUn | 48112611 | 48113157 | 547 SAT1_CF  | blue   | na |
| chrUn | 48113201 | 48114087 | 887 SAT1_CF  | blue   | na |
| chrUn | 48114106 | 48114658 | 553 SAT1_CF  | blue   | na |
| chrUn | 48114701 | 48116702 | 2002 SAT1_CF | blue   | na |
| chrUn | 48116742 | 48117243 | 502 SAT1_CF  | blue   | na |
| chrUn | 48117256 | 48117940 | 685 SAT1_CF  | blue   | na |
| chrUn | 48117951 | 48119395 | 1445 SAT1_CF | blue   | na |
| chrUn | 48119411 | 48119572 | 162 SAT1_CF  | blue   | na |
| chrUn | 48119586 | 48120535 | 950 SAT1_CF  | blue   | na |
| chrUn | 48120547 | 48121437 | 891 SAT1_CF  | blue   | na |
| chrUn | 48121450 | 48122741 | 1292 SAT1_CF | blue   | na |
| chrUn | 48122783 | 48124526 | 1744 SAT1_CF | blue   | na |
| chrUn | 48124564 | 48126963 | 2400 SAT1_CF | blue   | na |
| chrUn | 48126983 | 48127183 | 201 SAT1_CF  | blue   | na |
| chrUn | 48127196 | 48128737 | 1542 SAT1_CF | blue   | na |
| chrUn | 48128779 | 48131421 | 2643 SAT1_CF | blue   | na |
| chrUn | 48131435 | 48132124 | 690 SAT1_CF  | blue   | na |
| chrUn | 48132136 | 48132816 | 681 SAT1_CF  | blue   | na |
| chrUn | 48132865 | 48134470 | 1606 SAT1_CF | blue   | na |
| chrUn | 48134514 | 48135312 | 799 SAT1_CF  | blue   | na |
| chrUn | 48135325 | 48136006 | 682 SAT1_CF  | blue   | na |
| chrUn | 48136024 | 48136729 | 706 SAT1_CF  | blue   | na |
| chrUn | 48136762 | 48137326 | 565 SAT1_CF  | blue   | na |
| chrUn | 48137387 | 48137868 | 482 SAT1_CF  | blue   | na |
| chrUn | 48137881 | 48138682 | 802 SAT1_CF  | blue   | na |
| chrUn | 48138710 | 48139332 | 623 SAT1_CF  | blue   | na |
| chrUn | 48252182 | 48252513 | 332 Sat2CF   | purple | na |
| chrUn | 48252213 | 48252387 | 175 Sat2CF   | purple | na |
| chrUn | 48252223 | 48252707 | 485 Sat2CF   | purple | na |
| chrUn | 48267670 | 48268468 | 799 Sat2CF   | purple | na |
| chrUn | 48268350 | 48268518 | 169 Sat2CF   | purple | na |

|       |          |          |              |      |    |
|-------|----------|----------|--------------|------|----|
| chrUn | 48336757 | 48337131 | 375 SAT1_CF  | blue | na |
| chrUn | 48337171 | 48337670 | 500 SAT1_CF  | blue | na |
| chrUn | 48337683 | 48338443 | 761 SAT1_CF  | blue | na |
| chrUn | 48338456 | 48338527 | 72 SAT1_CF   | blue | na |
| chrUn | 48338550 | 48339100 | 551 SAT1_CF  | blue | na |
| chrUn | 48339118 | 48340334 | 1217 SAT1_CF | blue | na |
| chrUn | 48340367 | 48340523 | 157 SAT1_CF  | blue | na |
| chrUn | 48340568 | 48341070 | 503 SAT1_CF  | blue | na |
| chrUn | 48341083 | 48342222 | 1140 SAT1_CF | blue | na |
| chrUn | 48342264 | 48343045 | 782 SAT1_CF  | blue | na |
| chrUn | 48343088 | 48344293 | 1206 SAT1_CF | blue | na |
| chrUn | 48344318 | 48344678 | 361 SAT1_CF  | blue | na |
| chrUn | 48344757 | 48346081 | 1325 SAT1_CF | blue | na |
| chrUn | 48346093 | 48347424 | 1332 SAT1_CF | blue | na |
| chrUn | 48347468 | 48347774 | 307 SAT1_CF  | blue | na |
| chrUn | 48347840 | 48348775 | 936 SAT1_CF  | blue | na |
| chrUn | 48348796 | 48349316 | 521 SAT1_CF  | blue | na |
| chrUn | 48349328 | 48350003 | 676 SAT1_CF  | blue | na |
| chrUn | 48350045 | 48351137 | 1093 SAT1_CF | blue | na |
| chrUn | 48351149 | 48351752 | 604 SAT1_CF  | blue | na |
| chrUn | 48351779 | 48352366 | 588 SAT1_CF  | blue | na |
| chrUn | 48352393 | 48353064 | 672 SAT1_CF  | blue | na |
| chrUn | 48353108 | 48354451 | 1344 SAT1_CF | blue | na |
| chrUn | 48354511 | 48355442 | 932 SAT1_CF  | blue | na |
| chrUn | 48355454 | 48356129 | 676 SAT1_CF  | blue | na |
| chrUn | 48356177 | 48357134 | 958 SAT1_CF  | blue | na |
| chrUn | 48357213 | 48358126 | 914 SAT1_CF  | blue | na |
| chrUn | 48358211 | 48358694 | 484 SAT1_CF  | blue | na |
| chrUn | 48358240 | 48359562 | 1323 SAT1_CF | blue | na |
| chrUn | 48359575 | 48360249 | 675 SAT1_CF  | blue | na |
| chrUn | 48360261 | 48360905 | 645 SAT1_CF  | blue | na |
| chrUn | 48360949 | 48361415 | 467 SAT1_CF  | blue | na |
| chrUn | 48361431 | 48361950 | 520 SAT1_CF  | blue | na |
| chrUn | 48361980 | 48362645 | 666 SAT1_CF  | blue | na |
| chrUn | 48362665 | 48363516 | 852 SAT1_CF  | blue | na |
| chrUn | 48363558 | 48364354 | 797 SAT1_CF  | blue | na |
| chrUn | 48364398 | 48364942 | 545 SAT1_CF  | blue | na |
| chrUn | 48364955 | 48365357 | 403 SAT1_CF  | blue | na |
| chrUn | 48365397 | 48366174 | 778 SAT1_CF  | blue | na |
| chrUn | 48366202 | 48367786 | 1585 SAT1_CF | blue | na |
| chrUn | 48367838 | 48368396 | 559 SAT1_CF  | blue | na |
| chrUn | 48368408 | 48369740 | 1333 SAT1_CF | blue | na |

|       |          |          |              |        |    |
|-------|----------|----------|--------------|--------|----|
| chrUn | 48369765 | 48370090 | 326 SAT1_CF  | blue   | na |
| chrUn | 48370134 | 48371247 | 1114 SAT1_CF | blue   | na |
| chrUn | 48371276 | 48371797 | 522 SAT1_CF  | blue   | na |
| chrUn | 48371815 | 48372097 | 283 SAT1_CF  | blue   | na |
| chrUn | 48400839 | 48400988 | 150 Sat2CF   | purple | na |
| chrUn | 48400864 | 48401950 | 1087 Sat2CF  | purple | na |
| chrUn | 48400949 | 48402084 | 1136 Sat2CF  | purple | na |
| chrUn | 48409401 | 48409936 | 536 SAT1_CF  | blue   | na |
| chrUn | 48410004 | 48410525 | 522 SAT1_CF  | blue   | na |
| chrUn | 48410538 | 48410641 | 104 SAT1_CF  | blue   | na |
| chrUn | 48410665 | 48412898 | 2234 SAT1_CF | blue   | na |
| chrUn | 48412914 | 48413602 | 689 SAT1_CF  | blue   | na |
| chrUn | 48413623 | 48414154 | 532 SAT1_CF  | blue   | na |
| chrUn | 48415816 | 48416668 | 853 SAT1_CF  | blue   | na |
| chrUn | 48416680 | 48417223 | 544 SAT1_CF  | blue   | na |
| chrUn | 48417291 | 48417811 | 521 SAT1_CF  | blue   | na |
| chrUn | 48417823 | 48419154 | 1332 SAT1_CF | blue   | na |
| chrUn | 48419198 | 48420154 | 957 SAT1_CF  | blue   | na |
| chrUn | 48420234 | 48420815 | 582 SAT1_CF  | blue   | na |
| chrUn | 48420827 | 48422014 | 1188 SAT1_CF | blue   | na |
| chrUn | 48422041 | 48422544 | 504 SAT1_CF  | blue   | na |
| chrUn | 48422564 | 48423570 | 1007 SAT1_CF | blue   | na |
| chrUn | 48423623 | 48424124 | 502 SAT1_CF  | blue   | na |
| chrUn | 48424137 | 48425690 | 1554 SAT1_CF | blue   | na |
| chrUn | 48425732 | 48426275 | 544 SAT1_CF  | blue   | na |
| chrUn | 48426297 | 48427087 | 791 SAT1_CF  | blue   | na |
| chrUn | 48427130 | 48427640 | 511 SAT1_CF  | blue   | na |
| chrUn | 48427667 | 48427800 | 134 SAT1_CF  | blue   | na |
| chrUn | 48427858 | 48428359 | 502 SAT1_CF  | blue   | na |
| chrUn | 48428372 | 48429739 | 1368 SAT1_CF | blue   | na |
| chrUn | 48429781 | 48430410 | 630 SAT1_CF  | blue   | na |
| chrUn | 48430438 | 48433657 | 3220 SAT1_CF | blue   | na |
| chrUn | 48433677 | 48434160 | 484 SAT1_CF  | blue   | na |
| chrUn | 48434172 | 48436926 | 2755 SAT1_CF | blue   | na |
| chrUn | 48436961 | 48437462 | 502 SAT1_CF  | blue   | na |
| chrUn | 48437484 | 48438158 | 675 SAT1_CF  | blue   | na |
| chrUn | 48438170 | 48439062 | 893 SAT1_CF  | blue   | na |
| chrUn | 48439131 | 48439676 | 546 SAT1_CF  | blue   | na |
| chrUn | 48439718 | 48440907 | 1190 SAT1_CF | blue   | na |
| chrUn | 48440953 | 48442270 | 1318 SAT1_CF | blue   | na |
| chrUn | 48442292 | 48443918 | 1627 SAT1_CF | blue   | na |
| chrUn | 48443950 | 48444639 | 690 SAT1_CF  | blue   | na |

|       |          |          |      |         |      |    |
|-------|----------|----------|------|---------|------|----|
| chrUn | 48444686 | 48445199 | 514  | SAT1_CF | blue | na |
| chrUn | 48445221 | 48446007 | 787  | SAT1_CF | blue | na |
| chrUn | 48484229 | 48484899 | 671  | CarSat1 | red  | na |
| chrUn | 48484920 | 48486126 | 1207 | CarSat1 | red  | na |
| chrUn | 48486151 | 48489070 | 2920 | CarSat1 | red  | na |
| chrUn | 48489095 | 48490314 | 1220 | CarSat1 | red  | na |
| chrUn | 48490344 | 48490784 | 441  | CarSat1 | red  | na |
| chrUn | 48490811 | 48491526 | 716  | CarSat1 | red  | na |
| chrUn | 48491547 | 48494223 | 2677 | CarSat1 | red  | na |
| chrUn | 48494248 | 48496433 | 2186 | CarSat1 | red  | na |
| chrUn | 48496458 | 48497410 | 953  | CarSat1 | red  | na |
| chrUn | 48497435 | 48498152 | 718  | CarSat1 | red  | na |
| chrUn | 48498178 | 48499365 | 1188 | CarSat1 | red  | na |
| chrUn | 48501619 | 48502171 | 553  | CarSat1 | red  | na |
| chrUn | 48502200 | 48502911 | 712  | CarSat1 | red  | na |
| chrUn | 48502938 | 48503917 | 980  | CarSat1 | red  | na |
| chrUn | 48503947 | 48504655 | 709  | CarSat1 | red  | na |
| chrUn | 48504685 | 48505125 | 441  | CarSat1 | red  | na |
| chrUn | 48505152 | 48505867 | 716  | CarSat1 | red  | na |
| chrUn | 48505888 | 48506598 | 711  | CarSat1 | red  | na |
| chrUn | 48506625 | 48507085 | 461  | CarSat1 | red  | na |
| chrUn | 48507110 | 48508809 | 1700 | CarSat1 | red  | na |
| chrUn | 48508834 | 48509584 | 751  | CarSat1 | red  | na |
| chrUn | 48509928 | 48511289 | 1362 | CarSat1 | red  | na |
| chrUn | 48511317 | 48512253 | 937  | CarSat1 | red  | na |
| chrUn | 48512269 | 48513231 | 963  | CarSat1 | red  | na |
| chrUn | 48513258 | 48516447 | 3190 | CarSat1 | red  | na |
| chrUn | 48516477 | 48516917 | 441  | CarSat1 | red  | na |
| chrUn | 48516944 | 48519624 | 2681 | CarSat1 | red  | na |
| chrUn | 48519640 | 48520352 | 713  | CarSat1 | red  | na |
| chrUn | 48520377 | 48520885 | 509  | CarSat1 | red  | na |
| chrUn | 48520900 | 48521382 | 483  | CarSat1 | red  | na |
| chrUn | 48522452 | 48523069 | 618  | CarSat1 | red  | na |
| chrUn | 48523096 | 48524167 | 1072 | CarSat1 | red  | na |
| chrUn | 48524181 | 48524970 | 790  | CarSat1 | red  | na |
| chrUn | 48524986 | 48525561 | 576  | CarSat1 | red  | na |
| chrUn | 48526407 | 48527283 | 877  | CarSat1 | red  | na |
| chrUn | 48527310 | 48528019 | 710  | CarSat1 | red  | na |
| chrUn | 48532974 | 48534039 | 1066 | CarSat1 | red  | na |
| chrUn | 48536980 | 48538764 | 1785 | CarSat1 | red  | na |
| chrUn | 48543488 | 48544138 | 651  | CarSat1 | red  | na |
| chrUn | 48544154 | 48545116 | 963  | CarSat1 | red  | na |

|       |          |          |      |         |        |    |
|-------|----------|----------|------|---------|--------|----|
| chrUn | 48545143 | 48546120 | 978  | CarSat1 | red    | na |
| chrUn | 48546266 | 48547272 | 1007 | CarSat1 | red    | na |
| chrUn | 48547299 | 48547847 | 549  | CarSat1 | red    | na |
| chrUn | 48548477 | 48549571 | 1095 | CarSat1 | red    | na |
| chrUn | 48549598 | 48550489 | 892  | CarSat1 | red    | na |
| chrUn | 48551643 | 48552649 | 1007 | CarSat1 | red    | na |
| chrUn | 48552676 | 48553387 | 712  | CarSat1 | red    | na |
| chrUn | 48553414 | 48554124 | 711  | CarSat1 | red    | na |
| chrUn | 48554151 | 48554674 | 524  | CarSat1 | red    | na |
| chrUn | 48555614 | 48557665 | 2052 | CarSat1 | red    | na |
| chrUn | 48557681 | 48558355 | 675  | CarSat1 | red    | na |
| chrUn | 48559977 | 48560940 | 964  | CarSat1 | red    | na |
| chrUn | 48563799 | 48564863 | 1065 | CarSat1 | red    | na |
| chrUn | 48565706 | 48566490 | 785  | CarSat1 | red    | na |
| chrUn | 48566517 | 48567103 | 587  | CarSat1 | red    | na |
| chrUn | 48567374 | 48567974 | 601  | CarSat1 | red    | na |
| chrUn | 48567991 | 48568919 | 929  | CarSat1 | red    | na |
| chrUn | 48568946 | 48569415 | 470  | CarSat1 | red    | na |
| chrUn | 48569431 | 48570007 | 577  | CarSat1 | red    | na |
| chrUn | 48571211 | 48572041 | 831  | CarSat1 | red    | na |
| chrUn | 48572068 | 48572779 | 712  | CarSat1 | red    | na |
| chrUn | 48572806 | 48574000 | 1195 | CarSat1 | red    | na |
| chrUn | 48574027 | 48575457 | 1431 | CarSat1 | red    | na |
| chrUn | 48575474 | 48576194 | 721  | CarSat1 | red    | na |
| chrUn | 48576211 | 48577522 | 1312 | CarSat1 | red    | na |
| chrUn | 48577549 | 48578259 | 711  | CarSat1 | red    | na |
| chrUn | 48578286 | 48578995 | 710  | CarSat1 | red    | na |
| chrUn | 48580162 | 48581202 | 1041 | CarSat1 | red    | na |
| chrUn | 48586498 | 48587376 | 879  | CarSat1 | red    | na |
| chrUn | 48587404 | 48588252 | 849  | CarSat1 | red    | na |
| chrUn | 48588274 | 48588619 | 346  | CarSat1 | red    | na |
| chrUn | 48589501 | 48590964 | 1464 | CarSat1 | red    | na |
| chrUn | 48593915 | 48594999 | 1085 | Sat2CF  | purple | na |
| chrUn | 48594000 | 48595133 | 1134 | Sat2CF  | purple | na |
| chrUn | 48607686 | 48608231 | 546  | Sat2CF  | purple | na |
| chrUn | 48607761 | 48608608 | 848  | Sat2CF  | purple | na |
| chrUn | 48607783 | 48608506 | 724  | Sat2CF  | purple | na |
| chrUn | 48623345 | 48624527 | 1183 | Sat2CF  | purple | na |
| chrUn | 48627092 | 48628219 | 1128 | CarSat1 | red    | na |
| chrUn | 48628237 | 48628693 | 457  | CarSat1 | red    | na |
| chrUn | 48630727 | 48632508 | 1782 | SAT1_CF | blue   | na |
| chrUn | 48632542 | 48633670 | 1129 | SAT1_CF | blue   | na |

|       |          |          |              |        |    |
|-------|----------|----------|--------------|--------|----|
| chrUn | 48778129 | 48778721 | 593 SAT1_CF  | blue   | na |
| chrUn | 48778767 | 48779557 | 791 SAT1_CF  | blue   | na |
| chrUn | 48779612 | 48780458 | 847 SAT1_CF  | blue   | na |
| chrUn | 48780470 | 48781138 | 669 SAT1_CF  | blue   | na |
| chrUn | 48781165 | 48781666 | 502 SAT1_CF  | blue   | na |
| chrUn | 48781753 | 48782939 | 1187 SAT1_CF | blue   | na |
| chrUn | 48782981 | 48783598 | 618 SAT1_CF  | blue   | na |
| chrUn | 48783611 | 48784364 | 754 SAT1_CF  | blue   | na |
| chrUn | 48784810 | 48786307 | 1498 SAT1_CF | blue   | na |
| chrUn | 48786319 | 48786820 | 502 SAT1_CF  | blue   | na |
| chrUn | 48786860 | 48789413 | 2554 SAT1_CF | blue   | na |
| chrUn | 48789439 | 48790124 | 686 SAT1_CF  | blue   | na |
| chrUn | 48790627 | 48791089 | 463 SAT1_CF  | blue   | na |
| chrUn | 48791102 | 48791862 | 761 SAT1_CF  | blue   | na |
| chrUn | 48791875 | 48792734 | 860 SAT1_CF  | blue   | na |
| chrUn | 48792747 | 48793248 | 502 SAT1_CF  | blue   | na |
| chrUn | 48793336 | 48793687 | 352 SAT1_CF  | blue   | na |
| chrUn | 48793699 | 48796566 | 2868 SAT1_CF | blue   | na |
| chrUn | 48796568 | 48798537 | 1970 CarSat1 | red    | na |
| chrUn | 48798559 | 48799262 | 704 CarSat1  | red    | na |
| chrUn | 48838328 | 48840011 | 1684 SAT1_CF | blue   | na |
| chrUn | 48840022 | 48840408 | 387 SAT1_CF  | blue   | na |
| chrUn | 48840411 | 48841851 | 1441 CarSat1 | red    | na |
| chrUn | 48841868 | 48843007 | 1140 CarSat1 | red    | na |
| chrUn | 48843219 | 48844004 | 786 CarSat1  | red    | na |
| chrUn | 48844025 | 48844880 | 856 CarSat1  | red    | na |
| chrUn | 48844984 | 48845633 | 650 CarSat1  | red    | na |
| chrUn | 48845846 | 48846194 | 349 CarSat1  | red    | na |
| chrUn | 48846377 | 48846536 | 160 CarSat1  | red    | na |
| chrUn | 48846552 | 48846846 | 295 CarSat1  | red    | na |
| chrUn | 48846873 | 48847595 | 723 CarSat1  | red    | na |
| chrUn | 48847744 | 48848726 | 983 CarSat1  | red    | na |
| chrUn | 48888200 | 48888994 | 795 Sat2CF   | purple | na |
| chrUn | 48888739 | 48889037 | 299 Sat2CF   | purple | na |
| chrUn | 48890714 | 48891124 | 411 CarSat1  | red    | na |
| chrUn | 48891931 | 48892073 | 143 CarSat1  | red    | na |
| chrUn | 48892094 | 48892803 | 710 CarSat1  | red    | na |
| chrUn | 48892968 | 48893767 | 800 CarSat1  | red    | na |
| chrUn | 48893791 | 48894559 | 769 CarSat1  | red    | na |
| chrUn | 48894580 | 48895423 | 844 CarSat1  | red    | na |
| chrUn | 48895453 | 48896639 | 1187 CarSat1 | red    | na |
| chrUn | 48896630 | 48897348 | 719 SAT1_CF  | blue   | na |

|       |          |          |              |      |    |
|-------|----------|----------|--------------|------|----|
| chrUn | 48897428 | 48897622 | 195 SAT1_CF  | blue | na |
| chrUn | 48897650 | 48898381 | 732 SAT1_CF  | blue | na |
| chrUn | 48898423 | 48900287 | 1865 SAT1_CF | blue | na |
| chrUn | 48900311 | 48900853 | 543 SAT1_CF  | blue | na |
| chrUn | 48900866 | 48901549 | 684 SAT1_CF  | blue | na |
| chrUn | 48901562 | 48903059 | 1498 SAT1_CF | blue | na |
| chrUn | 48903102 | 48904174 | 1073 SAT1_CF | blue | na |
| chrUn | 48904206 | 48905147 | 942 SAT1_CF  | blue | na |
| chrUn | 48905187 | 48905688 | 502 SAT1_CF  | blue | na |
| chrUn | 48905701 | 48906384 | 684 SAT1_CF  | blue | na |
| chrUn | 48906397 | 48907205 | 809 SAT1_CF  | blue | na |
| chrUn | 48907219 | 48908336 | 1118 SAT1_CF | blue | na |
| chrUn | 48908376 | 48909282 | 907 SAT1_CF  | blue | na |
| chrUn | 48950615 | 48951734 | 1120 CarSat1 | red  | na |
| chrUn | 48959858 | 48960840 | 983 CarSat1  | red  | na |
| chrUn | 48960867 | 48961718 | 852 CarSat1  | red  | na |
| chrUn | 48961739 | 48962593 | 855 CarSat1  | red  | na |
| chrUn | 48962783 | 48963463 | 681 CarSat1  | red  | na |
| chrUn | 48963663 | 48963939 | 277 CarSat1  | red  | na |
| chrUn | 48964130 | 48964534 | 405 CarSat1  | red  | na |
| chrUn | 48964685 | 48965408 | 724 CarSat1  | red  | na |
| chrUn | 48965427 | 48966279 | 853 CarSat1  | red  | na |
| chrUn | 48966429 | 48967078 | 650 CarSat1  | red  | na |
| chrUn | 48967092 | 48967567 | 476 CarSat1  | red  | na |
| chrUn | 48967584 | 48968278 | 695 CarSat1  | red  | na |
| chrUn | 48968283 | 48968668 | 386 SAT1_CF  | blue | na |
| chrUn | 48968680 | 48971285 | 2606 SAT1_CF | blue | na |
| chrUn | 48971458 | 48975558 | 4101 SAT1_CF | blue | na |
| chrUn | 48975595 | 48976157 | 563 SAT1_CF  | blue | na |
| chrUn | 48976201 | 48976748 | 548 SAT1_CF  | blue | na |
| chrUn | 48976839 | 48977719 | 881 SAT1_CF  | blue | na |
| chrUn | 48977712 | 48978439 | 728 CarSat1  | red  | na |
| chrUn | 48978457 | 48980427 | 1971 CarSat1 | red  | na |
| chrUn | 48980441 | 48980977 | 537 SAT1_CF  | blue | na |
| chrUn | 48981003 | 48981530 | 528 SAT1_CF  | blue | na |
| chrUn | 48981542 | 48982339 | 798 SAT1_CF  | blue | na |
| chrUn | 48982350 | 48984379 | 2030 SAT1_CF | blue | na |
| chrUn | 48984399 | 48985550 | 1152 SAT1_CF | blue | na |
| chrUn | 48985545 | 48986264 | 720 CarSat1  | red  | na |
| chrUn | 48986283 | 48986706 | 424 CarSat1  | red  | na |
| chrUn | 48987742 | 48988062 | 321 SAT1_CF  | blue | na |
| chrUn | 48988075 | 48988576 | 502 SAT1_CF  | blue | na |



|       |          |          |              |        |    |
|-------|----------|----------|--------------|--------|----|
| chrUn | 48988590 | 48989832 | 1243 SAT1_CF | blue   | na |
| chrUn | 48989885 | 48989961 | 77 SAT1_CF   | blue   | na |
| chrUn | 48989974 | 48991037 | 1064 SAT1_CF | blue   | na |
| chrUn | 48991051 | 48991928 | 878 SAT1_CF  | blue   | na |
| chrUn | 48991971 | 48992648 | 678 SAT1_CF  | blue   | na |
| chrUn | 48992660 | 48993342 | 683 SAT1_CF  | blue   | na |
| chrUn | 48993355 | 48994055 | 701 SAT1_CF  | blue   | na |
| chrUn | 48994083 | 48994593 | 511 SAT1_CF  | blue   | na |
| chrUn | 48994662 | 48995385 | 724 SAT1_CF  | blue   | na |
| chrUn | 48995397 | 48995880 | 484 SAT1_CF  | blue   | na |
| chrUn | 48995933 | 48996120 | 188 SAT1_CF  | blue   | na |
| chrUn | 48996131 | 48996679 | 549 SAT1_CF  | blue   | na |
| chrUn | 48996758 | 48997722 | 965 SAT1_CF  | blue   | na |
| chrUn | 48997765 | 48998310 | 546 SAT1_CF  | blue   | na |
| chrUn | 48998331 | 48998439 | 109 SAT1_CF  | blue   | na |
| chrUn | 48998452 | 48998953 | 502 SAT1_CF  | blue   | na |
| chrUn | 48998967 | 49000209 | 1243 SAT1_CF | blue   | na |
| chrUn | 49000262 | 49000338 | 77 SAT1_CF   | blue   | na |
| chrUn | 49000351 | 49000853 | 503 SAT1_CF  | blue   | na |
| chrUn | 49000898 | 49001055 | 158 SAT1_CF  | blue   | na |
| chrUn | 49001084 | 49002272 | 1189 SAT1_CF | blue   | na |
| chrUn | 49002300 | 49002931 | 632 SAT1_CF  | blue   | na |
| chrUn | 49002974 | 49003648 | 675 SAT1_CF  | blue   | na |
| chrUn | 49003661 | 49006076 | 2416 SAT1_CF | blue   | na |
| chrUn | 49006098 | 49006664 | 567 SAT1_CF  | blue   | na |
| chrUn | 49006719 | 49007091 | 373 SAT1_CF  | blue   | na |
| chrUn | 49007138 | 49007645 | 508 SAT1_CF  | blue   | na |
| chrUn | 49007689 | 49008506 | 818 SAT1_CF  | blue   | na |
| chrUn | 49008548 | 49009408 | 861 SAT1_CF  | blue   | na |
| chrUn | 49009420 | 49010477 | 1058 SAT1_CF | blue   | na |
| chrUn | 49010520 | 49011816 | 1297 SAT1_CF | blue   | na |
| chrUn | 49011834 | 49012354 | 521 SAT1_CF  | blue   | na |
| chrUn | 49012375 | 49014338 | 1964 SAT1_CF | blue   | na |
| chrUn | 49014380 | 49015057 | 678 SAT1_CF  | blue   | na |
| chrUn | 49015069 | 49016305 | 1237 SAT1_CF | blue   | na |
| chrUn | 49016340 | 49016880 | 541 SAT1_CF  | blue   | na |
| chrUn | 49016912 | 49018998 | 2087 CarSat1 | red    | na |
| chrUn | 49019028 | 49021478 | 2451 CarSat1 | red    | na |
| chrUn | 49042618 | 49043468 | 851 Sat2CF   | purple | na |
| chrUn | 49043020 | 49043518 | 499 Sat2CF   | purple | na |
| chrUn | 49059762 | 49061207 | 1446 CarSat1 | red    | na |
| chrUn | 49061228 | 49062830 | 1603 CarSat1 | red    | na |

|       |          |          |      |         |        |    |
|-------|----------|----------|------|---------|--------|----|
| chrUn | 49062984 | 49064447 | 1464 | CarSat1 | red    | na |
| chrUn | 49064468 | 49066070 | 1603 | CarSat1 | red    | na |
| chrUn | 49083047 | 49083085 | 39   | HSATII  | na     | na |
| chrUn | 49083268 | 49083329 | 62   | HSATII  | na     | na |
| chrUn | 49084516 | 49085392 | 877  | CarSat1 | red    | na |
| chrUn | 49085638 | 49086282 | 645  | CarSat1 | red    | na |
| chrUn | 49086363 | 49086838 | 476  | CarSat1 | red    | na |
| chrUn | 49087025 | 49087373 | 349  | CarSat1 | red    | na |
| chrUn | 49087457 | 49087932 | 476  | CarSat1 | red    | na |
| chrUn | 49088119 | 49088468 | 350  | CarSat1 | red    | na |
| chrUn | 49088552 | 49089327 | 776  | CarSat1 | red    | na |
| chrUn | 49089555 | 49092144 | 2590 | CarSat1 | red    | na |
| chrUn | 49092147 | 49092676 | 530  | SAT1_CF | blue   | na |
| chrUn | 49110883 | 49112061 | 1179 | Sat2CF  | purple | na |
| chrUn | 49110914 | 49111933 | 1020 | Sat2CF  | purple | na |
| chrUn | 49126774 | 49127957 | 1184 | Sat2CF  | purple | na |
| chrUn | 49129402 | 49129984 | 583  | SAT1_CF | blue   | na |
| chrUn | 49130026 | 49131536 | 1511 | SAT1_CF | blue   | na |
| chrUn | 49131550 | 49132167 | 618  | SAT1_CF | blue   | na |
| chrUn | 49132253 | 49133839 | 1587 | SAT1_CF | blue   | na |
| chrUn | 49133853 | 49134478 | 626  | SAT1_CF | blue   | na |
| chrUn | 49134490 | 49136824 | 2335 | SAT1_CF | blue   | na |
| chrUn | 49136882 | 49137513 | 632  | SAT1_CF | blue   | na |
| chrUn | 49137525 | 49138410 | 886  | SAT1_CF | blue   | na |
| chrUn | 49138423 | 49139126 | 704  | SAT1_CF | blue   | na |
| chrUn | 49139138 | 49139797 | 660  | SAT1_CF | blue   | na |
| chrUn | 49139845 | 49140378 | 534  | SAT1_CF | blue   | na |
| chrUn | 49140407 | 49141072 | 666  | SAT1_CF | blue   | na |
| chrUn | 49141116 | 49142481 | 1366 | SAT1_CF | blue   | na |
| chrUn | 49142691 | 49143965 | 1275 | SAT1_CF | blue   | na |
| chrUn | 49143977 | 49144652 | 676  | SAT1_CF | blue   | na |
| chrUn | 49144695 | 49148098 | 3404 | SAT1_CF | blue   | na |
| chrUn | 49148140 | 49148918 | 779  | SAT1_CF | blue   | na |
| chrUn | 49148984 | 49149505 | 522  | SAT1_CF | blue   | na |
| chrUn | 49149518 | 49149920 | 403  | SAT1_CF | blue   | na |
| chrUn | 49149941 | 49151420 | 1480 | SAT1_CF | blue   | na |
| chrUn | 49151840 | 49152066 | 227  | SAT1_CF | blue   | na |
| chrUn | 49152079 | 49152475 | 397  | SAT1_CF | blue   | na |
| chrUn | 49152520 | 49153107 | 588  | SAT1_CF | blue   | na |
| chrUn | 49153163 | 49153717 | 555  | SAT1_CF | blue   | na |
| chrUn | 49153729 | 49155774 | 2046 | SAT1_CF | blue   | na |
| chrUn | 49155954 | 49156138 | 185  | SAT1_CF | blue   | na |

|       |          |          |              |        |    |
|-------|----------|----------|--------------|--------|----|
| chrUn | 49156198 | 49156678 | 481 SAT1_CF  | blue   | na |
| chrUn | 49156691 | 49156796 | 106 SAT1_CF  | blue   | na |
| chrUn | 49156819 | 49158516 | 1698 SAT1_CF | blue   | na |
| chrUn | 49158531 | 49158602 | 72 SAT1_CF   | blue   | na |
| chrUn | 49158658 | 49159953 | 1296 SAT1_CF | blue   | na |
| chrUn | 49159996 | 49160608 | 613 SAT1_CF  | blue   | na |
| chrUn | 49160624 | 49161026 | 403 SAT1_CF  | blue   | na |
| chrUn | 49161066 | 49161567 | 502 SAT1_CF  | blue   | na |
| chrUn | 49161579 | 49161688 | 110 SAT1_CF  | blue   | na |
| chrUn | 49161709 | 49162339 | 631 SAT1_CF  | blue   | na |
| chrUn | 49162351 | 49162906 | 556 SAT1_CF  | blue   | na |
| chrUn | 49162917 | 49162965 | 49 SAT1_CF   | blue   | na |
| chrUn | 49175056 | 49175822 | 767 Sat2CF   | purple | na |
| chrUn | 49175077 | 49175740 | 664 Sat2CF   | purple | na |
| chrUn | 49196115 | 49196848 | 734 Sat2CF   | purple | na |
| chrUn | 49196189 | 49196846 | 658 Sat2CF   | purple | na |
| chrUn | 49218407 | 49218588 | 182 SAT1_CF  | blue   | na |
| chrUn | 49218600 | 49219842 | 1243 SAT1_CF | blue   | na |
| chrUn | 49221815 | 49222143 | 329 SAT1_CF  | blue   | na |
| chrUn | 49222213 | 49222757 | 545 SAT1_CF  | blue   | na |
| chrUn | 49222800 | 49223758 | 959 SAT1_CF  | blue   | na |
| chrUn | 49223771 | 49224430 | 660 SAT1_CF  | blue   | na |
| chrUn | 49224442 | 49225050 | 609 SAT1_CF  | blue   | na |
| chrUn | 49227406 | 49227807 | 402 SAT1_CF  | blue   | na |
| chrUn | 49227877 | 49228531 | 655 SAT1_CF  | blue   | na |
| chrUn | 49228543 | 49229023 | 481 SAT1_CF  | blue   | na |
| chrUn | 49229233 | 49229912 | 680 SAT1_CF  | blue   | na |
| chrUn | 49230012 | 49231237 | 1226 SAT1_CF | blue   | na |
| chrUn | 49231286 | 49231827 | 542 SAT1_CF  | blue   | na |
| chrUn | 49231865 | 49233140 | 1276 SAT1_CF | blue   | na |
| chrUn | 49233180 | 49233682 | 503 SAT1_CF  | blue   | na |
| chrUn | 49233694 | 49234379 | 686 SAT1_CF  | blue   | na |
| chrUn | 49234391 | 49235067 | 677 SAT1_CF  | blue   | na |
| chrUn | 49235110 | 49236645 | 1536 SAT1_CF | blue   | na |
| chrUn | 49238045 | 49239024 | 980 SAT1_CF  | blue   | na |
| chrUn | 49239052 | 49239536 | 485 SAT1_CF  | blue   | na |
| chrUn | 49240281 | 49240902 | 622 SAT1_CF  | blue   | na |
| chrUn | 49240930 | 49241087 | 158 SAT1_CF  | blue   | na |
| chrUn | 49241132 | 49242332 | 1201 SAT1_CF | blue   | na |
| chrUn | 49242352 | 49243024 | 673 SAT1_CF  | blue   | na |
| chrUn | 49243104 | 49245304 | 2201 SAT1_CF | blue   | na |
| chrUn | 49245320 | 49246829 | 1510 SAT1_CF | blue   | na |

|       |          |          |              |      |    |
|-------|----------|----------|--------------|------|----|
| chrUn | 49261525 | 49262309 | 785 SAT1_CF  | blue | na |
| chrUn | 49262383 | 49262902 | 520 SAT1_CF  | blue | na |
| chrUn | 49262958 | 49263359 | 402 SAT1_CF  | blue | na |
| chrUn | 49264364 | 49264519 | 156 SAT1_CF  | blue | na |
| chrUn | 49264564 | 49265064 | 501 SAT1_CF  | blue | na |
| chrUn | 49265081 | 49265668 | 588 SAT1_CF  | blue | na |
| chrUn | 49265680 | 49266322 | 643 SAT1_CF  | blue | na |
| chrUn | 49266514 | 49266889 | 376 SAT1_CF  | blue | na |
| chrUn | 49267765 | 49268733 | 969 SAT1_CF  | blue | na |
| chrUn | 49268914 | 49269097 | 184 SAT1_CF  | blue | na |
| chrUn | 49269118 | 49269637 | 520 SAT1_CF  | blue | na |
| chrUn | 49269650 | 49271766 | 2117 SAT1_CF | blue | na |
| chrUn | 49271779 | 49273004 | 1226 SAT1_CF | blue | na |
| chrUn | 49273053 | 49273145 | 93 SAT1_CF   | blue | na |
| chrUn | 49273202 | 49273760 | 559 SAT1_CF  | blue | na |
| chrUn | 49273771 | 49274201 | 431 SAT1_CF  | blue | na |
| chrUn | 49274280 | 49275438 | 1159 SAT1_CF | blue | na |
| chrUn | 49275651 | 49276137 | 487 SAT1_CF  | blue | na |
| chrUn | 49276189 | 49276346 | 158 SAT1_CF  | blue | na |
| chrUn | 49276391 | 49276892 | 502 SAT1_CF  | blue | na |
| chrUn | 49276906 | 49277663 | 758 SAT1_CF  | blue | na |
| chrUn | 49277713 | 49278622 | 910 SAT1_CF  | blue | na |
| chrUn | 49278676 | 49279492 | 817 SAT1_CF  | blue | na |
| chrUn | 49279541 | 49279990 | 450 SAT1_CF  | blue | na |
| chrUn | 49280003 | 49280979 | 977 SAT1_CF  | blue | na |
| chrUn | 49281005 | 49281507 | 503 SAT1_CF  | blue | na |
| chrUn | 49281535 | 49281692 | 158 SAT1_CF  | blue | na |
| chrUn | 49281718 | 49282238 | 521 SAT1_CF  | blue | na |
| chrUn | 49282250 | 49282924 | 675 SAT1_CF  | blue | na |
| chrUn | 49282966 | 49284133 | 1168 SAT1_CF | blue | na |
| chrUn | 49284203 | 49284676 | 474 SAT1_CF  | blue | na |
| chrUn | 49284689 | 49285284 | 596 SAT1_CF  | blue | na |
| chrUn | 49285318 | 49287055 | 1738 SAT1_CF | blue | na |
| chrUn | 49287172 | 49287270 | 99 SAT1_CF   | blue | na |
| chrUn | 49287330 | 49287879 | 550 SAT1_CF  | blue | na |
| chrUn | 49287921 | 49288605 | 685 SAT1_CF  | blue | na |
| chrUn | 49289499 | 49290170 | 672 SAT1_CF  | blue | na |
| chrUn | 49290215 | 49290847 | 633 SAT1_CF  | blue | na |
| chrUn | 49290875 | 49292110 | 1236 SAT1_CF | blue | na |
| chrUn | 49292122 | 49293372 | 1251 SAT1_CF | blue | na |
| chrUn | 49293384 | 49294001 | 618 SAT1_CF  | blue | na |
| chrUn | 49294043 | 49294593 | 551 SAT1_CF  | blue | na |

|       |          |          |      |         |      |    |
|-------|----------|----------|------|---------|------|----|
| chrUn | 49295111 | 49295428 | 318  | SAT1_CF | blue | na |
| chrUn | 49295452 | 49296830 | 1379 | SAT1_CF | blue | na |
| chrUn | 49331716 | 49332617 | 902  | SAT1_CF | blue | na |
| chrUn | 49332645 | 49332913 | 269  | SAT1_CF | blue | na |
| chrUn | 49332957 | 49333500 | 544  | SAT1_CF | blue | na |
| chrUn | 49333518 | 49334204 | 687  | SAT1_CF | blue | na |
| chrUn | 49334216 | 49336133 | 1918 | SAT1_CF | blue | na |
| chrUn | 49336176 | 49336683 | 508  | SAT1_CF | blue | na |
| chrUn | 49336716 | 49336872 | 157  | SAT1_CF | blue | na |
| chrUn | 49336898 | 49337418 | 521  | SAT1_CF | blue | na |
| chrUn | 49337430 | 49338027 | 598  | SAT1_CF | blue | na |
| chrUn | 49338047 | 49338959 | 913  | SAT1_CF | blue | na |
| chrUn | 49338987 | 49339255 | 269  | SAT1_CF | blue | na |
| chrUn | 49339299 | 49339842 | 544  | SAT1_CF | blue | na |
| chrUn | 49339860 | 49340546 | 687  | SAT1_CF | blue | na |
| chrUn | 49340558 | 49342901 | 2344 | SAT1_CF | blue | na |
| chrUn | 49342946 | 49343901 | 956  | SAT1_CF | blue | na |
| chrUn | 49343958 | 49344504 | 547  | SAT1_CF | blue | na |
| chrUn | 49344546 | 49346358 | 1813 | SAT1_CF | blue | na |
| chrUn | 49346403 | 49346904 | 502  | SAT1_CF | blue | na |
| chrUn | 49346922 | 49347029 | 108  | SAT1_CF | blue | na |
| chrUn | 49347046 | 49347678 | 633  | SAT1_CF | blue | na |
| chrUn | 49347722 | 49347768 | 47   | SAT1_CF | blue | na |
| chrUn | 49347785 | 49348303 | 519  | SAT1_CF | blue | na |
| chrUn | 49348315 | 49349167 | 853  | SAT1_CF | blue | na |
| chrUn | 49349218 | 49349841 | 624  | SAT1_CF | blue | na |
| chrUn | 49349928 | 49350590 | 663  | SAT1_CF | blue | na |
| chrUn | 49350602 | 49351462 | 861  | SAT1_CF | blue | na |
| chrUn | 49351504 | 49353361 | 1858 | SAT1_CF | blue | na |
| chrUn | 49353401 | 49353902 | 502  | SAT1_CF | blue | na |
| chrUn | 49353915 | 49354018 | 104  | SAT1_CF | blue | na |
| chrUn | 49354043 | 49354602 | 560  | SAT1_CF | blue | na |
| chrUn | 49354614 | 49355286 | 673  | SAT1_CF | blue | na |
| chrUn | 49355329 | 49356331 | 1003 | SAT1_CF | blue | na |
| chrUn | 49356398 | 49357333 | 936  | SAT1_CF | blue | na |
| chrUn | 49357442 | 49357938 | 497  | SAT1_CF | blue | na |
| chrUn | 49357956 | 49358058 | 103  | SAT1_CF | blue | na |
| chrUn | 49358079 | 49358634 | 556  | SAT1_CF | blue | na |
| chrUn | 49358647 | 49359253 | 607  | SAT1_CF | blue | na |
| chrUn | 49359265 | 49360124 | 860  | SAT1_CF | blue | na |
| chrUn | 49360135 | 49360736 | 602  | SAT1_CF | blue | na |
| chrUn | 49360758 | 49361160 | 403  | SAT1_CF | blue | na |

|       |          |          |              |      |    |
|-------|----------|----------|--------------|------|----|
| chrUn | 49361200 | 49362289 | 1090 SAT1_CF | blue | na |
| chrUn | 49362307 | 49362976 | 670 SAT1_CF  | blue | na |
| chrUn | 49363019 | 49363557 | 539 SAT1_CF  | blue | na |
| chrUn | 49363787 | 49364409 | 623 SAT1_CF  | blue | na |
| chrUn | 49365427 | 49366101 | 675 SAT1_CF  | blue | na |
| chrUn | 49366113 | 49367627 | 1515 SAT1_CF | blue | na |
| chrUn | 49367639 | 49368102 | 464 SAT1_CF  | blue | na |
| chrUn | 49368172 | 49368717 | 546 SAT1_CF  | blue | na |
| chrUn | 49368739 | 49368845 | 107 SAT1_CF  | blue | na |
| chrUn | 49368858 | 49369360 | 503 SAT1_CF  | blue | na |
| chrUn | 49369426 | 49369561 | 136 SAT1_CF  | blue | na |
| chrUn | 49369595 | 49370099 | 505 SAT1_CF  | blue | na |
| chrUn | 49370179 | 49370734 | 556 SAT1_CF  | blue | na |
| chrUn | 49370848 | 49371821 | 974 SAT1_CF  | blue | na |
| chrUn | 49371864 | 49372539 | 676 SAT1_CF  | blue | na |
| chrUn | 49372551 | 49373237 | 687 SAT1_CF  | blue | na |
| chrUn | 49373255 | 49373799 | 545 SAT1_CF  | blue | na |
| chrUn | 49373842 | 49374105 | 264 SAT1_CF  | blue | na |
| chrUn | 49374133 | 49374759 | 627 SAT1_CF  | blue | na |
| chrUn | 49374783 | 49374889 | 107 SAT1_CF  | blue | na |
| chrUn | 49374901 | 49376257 | 1357 SAT1_CF | blue | na |
| chrUn | 49376849 | 49377325 | 477 SAT1_CF  | blue | na |
| chrUn | 49377338 | 49377840 | 503 SAT1_CF  | blue | na |
| chrUn | 49377876 | 49378061 | 186 SAT1_CF  | blue | na |
| chrUn | 49378241 | 49379077 | 837 SAT1_CF  | blue | na |
| chrUn | 49379089 | 49379995 | 907 SAT1_CF  | blue | na |
| chrUn | 49380053 | 49380182 | 130 SAT1_CF  | blue | na |
| chrUn | 49381499 | 49381839 | 341 SAT1_CF  | blue | na |
| chrUn | 49381864 | 49383972 | 2109 SAT1_CF | blue | na |
| chrUn | 49383992 | 49384588 | 597 SAT1_CF  | blue | na |
| chrUn | 49384600 | 49385120 | 521 SAT1_CF  | blue | na |
| chrUn | 49385141 | 49386351 | 1211 SAT1_CF | blue | na |
| chrUn | 49386405 | 49387008 | 604 SAT1_CF  | blue | na |
| chrUn | 49387050 | 49387868 | 819 SAT1_CF  | blue | na |
| chrUn | 49387888 | 49388727 | 840 SAT1_CF  | blue | na |
| chrUn | 49388740 | 49389241 | 502 SAT1_CF  | blue | na |
| chrUn | 49389328 | 49389672 | 345 SAT1_CF  | blue | na |
| chrUn | 49389689 | 49390176 | 488 SAT1_CF  | blue | na |
| chrUn | 49390208 | 49390543 | 336 SAT1_CF  | blue | na |
| chrUn | 49390591 | 49391924 | 1334 SAT1_CF | blue | na |
| chrUn | 49391937 | 49392438 | 502 SAT1_CF  | blue | na |
| chrUn | 49392524 | 49392698 | 175 SAT1_CF  | blue | na |

|       |          |          |              |      |    |
|-------|----------|----------|--------------|------|----|
| chrUn | 49392779 | 49394025 | 1247 SAT1_CF | blue | na |
| chrUn | 49394037 | 49394589 | 553 SAT1_CF  | blue | na |
| chrUn | 49394611 | 49394683 | 73 SAT1_CF   | blue | na |
| chrUn | 49394696 | 49395624 | 929 SAT1_CF  | blue | na |
| chrUn | 49395636 | 49396804 | 1169 SAT1_CF | blue | na |
| chrUn | 49396816 | 49397887 | 1072 SAT1_CF | blue | na |
| chrUn | 49397901 | 49399722 | 1822 SAT1_CF | blue | na |
| chrUn | 49399735 | 49399952 | 218 SAT1_CF  | blue | na |
| chrUn | 49400952 | 49401527 | 576 SAT1_CF  | blue | na |
| chrUn | 49401573 | 49402081 | 509 SAT1_CF  | blue | na |
| chrUn | 49402160 | 49402485 | 326 SAT1_CF  | blue | na |
| chrUn | 49402510 | 49403405 | 896 SAT1_CF  | blue | na |
| chrUn | 49403475 | 49404444 | 970 SAT1_CF  | blue | na |
| chrUn | 49404488 | 49405819 | 1332 SAT1_CF | blue | na |
| chrUn | 49405833 | 49406375 | 543 SAT1_CF  | blue | na |
| chrUn | 49406492 | 49407624 | 1133 SAT1_CF | blue | na |
| chrUn | 49407677 | 49407753 | 77 SAT1_CF   | blue | na |
| chrUn | 49407766 | 49409555 | 1790 SAT1_CF | blue | na |
| chrUn | 49409569 | 49410452 | 884 SAT1_CF  | blue | na |
| chrUn | 49410495 | 49411169 | 675 SAT1_CF  | blue | na |
| chrUn | 49411182 | 49411849 | 668 SAT1_CF  | blue | na |
| chrUn | 49411877 | 49414798 | 2922 SAT1_CF | blue | na |
| chrUn | 49414841 | 49415508 | 668 SAT1_CF  | blue | na |
| chrUn | 49415530 | 49417664 | 2135 SAT1_CF | blue | na |
| chrUn | 49417694 | 49418237 | 544 SAT1_CF  | blue | na |
| chrUn | 49418279 | 49418691 | 413 SAT1_CF  | blue | na |
| chrUn | 49418743 | 49419371 | 629 SAT1_CF  | blue | na |
| chrUn | 49419395 | 49419501 | 107 SAT1_CF  | blue | na |
| chrUn | 49419513 | 49420196 | 684 SAT1_CF  | blue | na |
| chrUn | 49420209 | 49420709 | 501 SAT1_CF  | blue | na |
| chrUn | 49420749 | 49422439 | 1691 SAT1_CF | blue | na |
| chrUn | 49428613 | 49428979 | 367 SAT1_CF  | blue | na |
| chrUn | 49429096 | 49430190 | 1095 SAT1_CF | blue | na |
| chrUn | 49431613 | 49432295 | 683 SAT1_CF  | blue | na |
| chrUn | 49432340 | 49432496 | 157 SAT1_CF  | blue | na |
| chrUn | 49432511 | 49433035 | 525 SAT1_CF  | blue | na |
| chrUn | 49433116 | 49433668 | 553 SAT1_CF  | blue | na |
| chrUn | 49433737 | 49434039 | 303 SAT1_CF  | blue | na |
| chrUn | 49438043 | 49438601 | 559 SAT1_CF  | blue | na |
| chrUn | 49440694 | 49441414 | 721 SAT1_CF  | blue | na |
| chrUn | 49441426 | 49441947 | 522 SAT1_CF  | blue | na |
| chrUn | 49441979 | 49442343 | 365 SAT1_CF  | blue | na |

|       |          |          |              |      |    |
|-------|----------|----------|--------------|------|----|
| chrUn | 49444069 | 49444587 | 519 SAT1_CF  | blue | na |
| chrUn | 49444621 | 49444789 | 169 SAT1_CF  | blue | na |
| chrUn | 49444971 | 49445855 | 885 SAT1_CF  | blue | na |
| chrUn | 49447945 | 49448245 | 301 SAT1_CF  | blue | na |
| chrUn | 49448257 | 49448808 | 552 SAT1_CF  | blue | na |
| chrUn | 49448912 | 49449166 | 255 SAT1_CF  | blue | na |
| chrUn | 49451830 | 49452179 | 350 SAT1_CF  | blue | na |
| chrUn | 49452196 | 49452857 | 662 SAT1_CF  | blue | na |
| chrUn | 49458531 | 49459293 | 763 SAT1_CF  | blue | na |
| chrUn | 49459315 | 49461393 | 2079 SAT1_CF | blue | na |
| chrUn | 49461472 | 49462201 | 730 SAT1_CF  | blue | na |
| chrUn | 49462214 | 49462705 | 492 SAT1_CF  | blue | na |
| chrUn | 49462722 | 49463397 | 676 SAT1_CF  | blue | na |
| chrUn | 49463422 | 49465658 | 2237 SAT1_CF | blue | na |
| chrUn | 49465674 | 49465835 | 162 SAT1_CF  | blue | na |
| chrUn | 49465849 | 49466992 | 1144 SAT1_CF | blue | na |
| chrUn | 49467032 | 49468222 | 1191 SAT1_CF | blue | na |
| chrUn | 49468265 | 49468896 | 632 SAT1_CF  | blue | na |
| chrUn | 49468961 | 49469525 | 565 SAT1_CF  | blue | na |
| chrUn | 49469605 | 49470129 | 525 SAT1_CF  | blue | na |
| chrUn | 49470144 | 49470280 | 137 SAT1_CF  | blue | na |
| chrUn | 49470346 | 49471504 | 1159 SAT1_CF | blue | na |
| chrUn | 49471517 | 49472585 | 1069 SAT1_CF | blue | na |
| chrUn | 49472664 | 49473465 | 802 SAT1_CF  | blue | na |
| chrUn | 49473537 | 49474017 | 481 SAT1_CF  | blue | na |
| chrUn | 49474029 | 49475250 | 1222 SAT1_CF | blue | na |
| chrUn | 49475337 | 49475839 | 503 SAT1_CF  | blue | na |
| chrUn | 49475852 | 49475924 | 73 SAT1_CF   | blue | na |
| chrUn | 49475946 | 49476460 | 515 SAT1_CF  | blue | na |
| chrUn | 49476472 | 49477331 | 860 SAT1_CF  | blue | na |
| chrUn | 49477373 | 49478154 | 782 SAT1_CF  | blue | na |
| chrUn | 49478233 | 49478776 | 544 SAT1_CF  | blue | na |
| chrUn | 49478791 | 49478948 | 158 SAT1_CF  | blue | na |
| chrUn | 49479015 | 49479515 | 501 SAT1_CF  | blue | na |
| chrUn | 49479528 | 49481269 | 1742 SAT1_CF | blue | na |
| chrUn | 49481320 | 49481870 | 551 SAT1_CF  | blue | na |
| chrUn | 49483252 | 49483832 | 581 SAT1_CF  | blue | na |
| chrUn | 49483892 | 49484366 | 475 SAT1_CF  | blue | na |
| chrUn | 49484386 | 49485068 | 683 SAT1_CF  | blue | na |
| chrUn | 49485080 | 49485189 | 110 SAT1_CF  | blue | na |
| chrUn | 49485220 | 49486089 | 870 SAT1_CF  | blue | na |
| chrUn | 49487131 | 49487774 | 644 CarSat1  | red  | na |



|       |          |          |      |         |        |    |
|-------|----------|----------|------|---------|--------|----|
| chrUn | 49487801 | 49488761 | 961  | CarSat1 | red    | na |
| chrUn | 49488777 | 49489712 | 936  | CarSat1 | red    | na |
| chrUn | 49489728 | 49489855 | 128  | Carsat2 | orange | na |
| chrUn | 49489744 | 49490234 | 491  | CarSat1 | red    | na |
| chrUn | 49490252 | 49490964 | 713  | CarSat1 | red    | na |
| chrUn | 49490989 | 49493924 | 2936 | CarSat1 | red    | na |
| chrUn | 49493940 | 49494409 | 470  | CarSat1 | red    | na |
| chrUn | 49494436 | 49495687 | 1252 | CarSat1 | red    | na |
| chrUn | 49496761 | 49497651 | 891  | CarSat1 | red    | na |
| chrUn | 49497667 | 49499607 | 1941 | CarSat1 | red    | na |
| chrUn | 49499634 | 49501414 | 1781 | CarSat1 | red    | na |
| chrUn | 49501596 | 49503267 | 1672 | CarSat1 | red    | na |
| chrUn | 49503294 | 49504258 | 965  | CarSat1 | red    | na |
| chrUn | 49504479 | 49508155 | 3677 | CarSat1 | red    | na |
| chrUn | 49508185 | 49508892 | 708  | CarSat1 | red    | na |
| chrUn | 49508907 | 49509032 | 126  | Carsat2 | orange | na |
| chrUn | 49508922 | 49509897 | 976  | CarSat1 | red    | na |
| chrUn | 49509924 | 49510634 | 711  | CarSat1 | red    | na |
| chrUn | 49510655 | 49512106 | 1452 | CarSat1 | red    | na |
| chrUn | 49512133 | 49512841 | 709  | CarSat1 | red    | na |
| chrUn | 49512868 | 49513831 | 964  | CarSat1 | red    | na |
| chrUn | 49513847 | 49514316 | 470  | CarSat1 | red    | na |
| chrUn | 49514345 | 49515053 | 709  | CarSat1 | red    | na |
| chrUn | 49515080 | 49516528 | 1449 | CarSat1 | red    | na |
| chrUn | 49516549 | 49518990 | 2442 | CarSat1 | red    | na |
| chrUn | 49519015 | 49519474 | 460  | CarSat1 | red    | na |
| chrUn | 49519501 | 49520640 | 1140 | CarSat1 | red    | na |
| chrUn | 49569150 | 49570024 | 875  | CarSat1 | red    | na |
| chrUn | 49570122 | 49570977 | 856  | CarSat1 | red    | na |
| chrUn | 49570998 | 49571850 | 853  | CarSat1 | red    | na |
| chrUn | 49571999 | 49572660 | 662  | CarSat1 | red    | na |
| chrUn | 49572738 | 49573195 | 458  | CarSat1 | red    | na |
| chrUn | 49573379 | 49573788 | 410  | CarSat1 | red    | na |
| chrUn | 49573810 | 49574663 | 854  | CarSat1 | red    | na |
| chrUn | 49574690 | 49575491 | 802  | CarSat1 | red    | na |
| chrUn | 49575686 | 49578060 | 2375 | CarSat1 | red    | na |
| chrUn | 49578063 | 49578450 | 388  | SAT1_CF | blue   | na |
| chrUn | 49578462 | 49579140 | 679  | SAT1_CF | blue   | na |
| chrUn | 49579190 | 49580850 | 1661 | SAT1_CF | blue   | na |
| chrUn | 49580892 | 49582219 | 1328 | SAT1_CF | blue   | na |
| chrUn | 49582242 | 49583380 | 1139 | SAT1_CF | blue   | na |
| chrUn | 49583400 | 49586352 | 2953 | SAT1_CF | blue   | na |

|       |          |          |              |        |    |
|-------|----------|----------|--------------|--------|----|
| chrUn | 49586405 | 49587234 | 830 SAT1_CF  | blue   | na |
| chrUn | 49587277 | 49588002 | 726 CarSat1  | red    | na |
| chrUn | 49588023 | 49589612 | 1590 CarSat1 | red    | na |
| chrUn | 49589759 | 49591590 | 1832 CarSat1 | red    | na |
| chrUn | 49591592 | 49591985 | 394 SAT1_CF  | blue   | na |
| chrUn | 49591997 | 49593188 | 1192 SAT1_CF | blue   | na |
| chrUn | 49593269 | 49595341 | 2073 SAT1_CF | blue   | na |
| chrUn | 49595361 | 49596510 | 1150 SAT1_CF | blue   | na |
| chrUn | 49596505 | 49597129 | 625 CarSat1  | red    | na |
| chrUn | 49598140 | 49599493 | 1354 CarSat1 | red    | na |
| chrUn | 49600072 | 49601589 | 1518 CarSat1 | red    | na |
| chrUn | 49603379 | 49604307 | 929 CarSat1  | red    | na |
| chrUn | 49604337 | 49605093 | 757 CarSat1  | red    | na |
| chrUn | 49605246 | 49606690 | 1445 CarSat1 | red    | na |
| chrUn | 49606993 | 49609312 | 2320 CarSat1 | red    | na |
| chrUn | 49609660 | 49610145 | 486 CarSat1  | red    | na |
| chrUn | 49610169 | 49611063 | 895 CarSat1  | red    | na |
| chrUn | 49611635 | 49612693 | 1059 CarSat1 | red    | na |
| chrUn | 49613477 | 49614599 | 1123 CarSat1 | red    | na |
| chrUn | 49615072 | 49615645 | 574 CarSat1  | red    | na |
| chrUn | 49615675 | 49616387 | 713 CarSat1  | red    | na |
| chrUn | 49616417 | 49617124 | 708 CarSat1  | red    | na |
| chrUn | 49617139 | 49617265 | 127 Carsat2  | orange | na |
| chrUn | 49617154 | 49618232 | 1079 CarSat1 | red    | na |
| chrUn | 49618247 | 49619040 | 794 CarSat1  | red    | na |
| chrUn | 49619051 | 49620396 | 1346 CarSat1 | red    | na |
| chrUn | 49620930 | 49622643 | 1714 CarSat1 | red    | na |
| chrUn | 49623496 | 49624283 | 788 CarSat1  | red    | na |
| chrUn | 49624299 | 49624423 | 125 Carsat2  | orange | na |
| chrUn | 49624312 | 49624798 | 487 CarSat1  | red    | na |
| chrUn | 49624822 | 49625295 | 474 CarSat1  | red    | na |
| chrUn | 49625326 | 49626404 | 1079 CarSat1 | red    | na |
| chrUn | 49626431 | 49628610 | 2180 CarSat1 | red    | na |
| chrUn | 49628626 | 49628750 | 125 Carsat2  | orange | na |
| chrUn | 49628639 | 49629351 | 713 CarSat1  | red    | na |
| chrUn | 49629381 | 49629867 | 487 CarSat1  | red    | na |
| chrUn | 49629900 | 49631415 | 1516 CarSat1 | red    | na |
| chrUn | 49633108 | 49634269 | 1162 CarSat1 | red    | na |
| chrUn | 49634303 | 49635619 | 1317 CarSat1 | red    | na |
| chrUn | 49635649 | 49636222 | 574 CarSat1  | red    | na |
| chrUn | 49637619 | 49639249 | 1631 CarSat1 | red    | na |
| chrUn | 49652711 | 49656055 | 3345 CarSat1 | red    | na |

|       |          |          |      |         |        |    |
|-------|----------|----------|------|---------|--------|----|
| chrUn | 49656066 | 49657577 | 1512 | CarSat1 | red    | na |
| chrUn | 49661244 | 49662237 | 994  | CarSat1 | red    | na |
| chrUn | 49662422 | 49662998 | 577  | CarSat1 | red    | na |
| chrUn | 49664290 | 49667949 | 3660 | CarSat1 | red    | na |
| chrUn | 49668392 | 49669933 | 1542 | CarSat1 | red    | na |
| chrUn | 49670650 | 49671806 | 1157 | CarSat1 | red    | na |
| chrUn | 49671836 | 49674024 | 2189 | CarSat1 | red    | na |
| chrUn | 49674054 | 49676235 | 2182 | CarSat1 | red    | na |
| chrUn | 49676259 | 49676759 | 501  | CarSat1 | red    | na |
| chrUn | 49676774 | 49677865 | 1092 | CarSat1 | red    | na |
| chrUn | 49680393 | 49681414 | 1022 | CarSat1 | red    | na |
| chrUn | 49681721 | 49682793 | 1073 | CarSat1 | red    | na |
| chrUn | 49683821 | 49685801 | 1981 | CarSat1 | red    | na |
| chrUn | 49687467 | 49688587 | 1121 | CarSat1 | red    | na |
| chrUn | 49689542 | 49690445 | 904  | CarSat1 | red    | na |
| chrUn | 49690479 | 49691512 | 1034 | CarSat1 | red    | na |
| chrUn | 49725045 | 49725959 | 915  | CarSat1 | red    | na |
| chrUn | 49725980 | 49726833 | 854  | CarSat1 | red    | na |
| chrUn | 49726854 | 49728071 | 1218 | CarSat1 | red    | na |
| chrUn | 49728257 | 49728657 | 401  | CarSat1 | red    | na |
| chrUn | 49728678 | 49730276 | 1599 | CarSat1 | red    | na |
| chrUn | 49730297 | 49731514 | 1218 | CarSat1 | red    | na |
| chrUn | 49731700 | 49732100 | 401  | CarSat1 | red    | na |
| chrUn | 49732121 | 49733719 | 1599 | CarSat1 | red    | na |
| chrUn | 49733740 | 49735337 | 1598 | CarSat1 | red    | na |
| chrUn | 49735368 | 49736957 | 1590 | CarSat1 | red    | na |
| chrUn | 49736978 | 49737477 | 500  | CarSat1 | red    | na |
| chrUn | 49749482 | 49750125 | 644  | SAT1_CF | blue   | na |
| chrUn | 49750168 | 49751280 | 1113 | SAT1_CF | blue   | na |
| chrUn | 49751312 | 49752166 | 855  | SAT1_CF | blue   | na |
| chrUn | 49752210 | 49755384 | 3175 | SAT1_CF | blue   | na |
| chrUn | 49755428 | 49756568 | 1141 | SAT1_CF | blue   | na |
| chrUn | 49756554 | 49757276 | 723  | CarSat1 | red    | na |
| chrUn | 49758288 | 49760854 | 2567 | CarSat1 | red    | na |
| chrUn | 49760884 | 49761370 | 487  | CarSat1 | red    | na |
| chrUn | 49761394 | 49764533 | 3140 | CarSat1 | red    | na |
| chrUn | 49764563 | 49765783 | 1221 | CarSat1 | red    | na |
| chrUn | 49765807 | 49767268 | 1462 | CarSat1 | red    | na |
| chrUn | 49767309 | 49768226 | 918  | CarSat1 | red    | na |
| chrUn | 49768241 | 49768367 | 127  | Carsat2 | orange | na |
| chrUn | 49768256 | 49768740 | 485  | CarSat1 | red    | na |
| chrUn | 49768764 | 49770443 | 1680 | CarSat1 | red    | na |

|       |          |          |      |         |        |    |
|-------|----------|----------|------|---------|--------|----|
| chrUn | 49770473 | 49774114 | 3642 | CarSat1 | red    | na |
| chrUn | 49774140 | 49774263 | 124  | Carsat2 | orange | na |
| chrUn | 49774155 | 49774641 | 487  | CarSat1 | red    | na |
| chrUn | 49774665 | 49779089 | 4425 | CarSat1 | red    | na |
| chrUn | 49779113 | 49779849 | 737  | CarSat1 | red    | na |
| chrUn | 49779873 | 49781536 | 1664 | CarSat1 | red    | na |
| chrUn | 49781579 | 49789739 | 8161 | CarSat1 | red    | na |
| chrUn | 49790739 | 49791291 | 553  | SAT1_CF | blue   | na |
| chrUn | 49791331 | 49793716 | 2386 | SAT1_CF | blue   | na |
| chrUn | 49793728 | 49794200 | 473  | SAT1_CF | blue   | na |
| chrUn | 49794226 | 49794329 | 104  | SAT1_CF | blue   | na |
| chrUn | 49794342 | 49794842 | 501  | SAT1_CF | blue   | na |
| chrUn | 49794885 | 49795283 | 399  | SAT1_CF | blue   | na |
| chrUn | 49795294 | 49796389 | 1096 | SAT1_CF | blue   | na |
| chrUn | 49796404 | 49797235 | 832  | SAT1_CF | blue   | na |
| chrUn | 49797249 | 49797564 | 316  | SAT1_CF | blue   | na |
| chrUn | 49797606 | 49798288 | 683  | SAT1_CF | blue   | na |
| chrUn | 49798302 | 49798795 | 494  | SAT1_CF | blue   | na |
| chrUn | 49798806 | 49799824 | 1019 | SAT1_CF | blue   | na |
| chrUn | 49799862 | 49802288 | 2427 | SAT1_CF | blue   | na |
| chrUn | 49802308 | 49804608 | 2301 | SAT1_CF | blue   | na |
| chrUn | 49804631 | 49805436 | 806  | SAT1_CF | blue   | na |
| chrUn | 49805447 | 49805945 | 499  | SAT1_CF | blue   | na |
| chrUn | 49805974 | 49806338 | 365  | SAT1_CF | blue   | na |
| chrUn | 49806445 | 49807009 | 565  | SAT1_CF | blue   | na |
| chrUn | 49807052 | 49807595 | 544  | SAT1_CF | blue   | na |
| chrUn | 49807618 | 49808952 | 1335 | SAT1_CF | blue   | na |
| chrUn | 49808973 | 49809932 | 960  | SAT1_CF | blue   | na |
| chrUn | 49810047 | 49810536 | 490  | SAT1_CF | blue   | na |
| chrUn | 49810559 | 49812335 | 1777 | SAT1_CF | blue   | na |
| chrUn | 49812450 | 49813414 | 965  | SAT1_CF | blue   | na |
| chrUn | 49813457 | 49814003 | 547  | SAT1_CF | blue   | na |
| chrUn | 49814024 | 49814414 | 391  | SAT1_CF | blue   | na |
| chrUn | 49817722 | 49818686 | 965  | SAT1_CF | blue   | na |
| chrUn | 49818730 | 49819274 | 545  | SAT1_CF | blue   | na |
| chrUn | 49819330 | 49819405 | 76   | SAT1_CF | blue   | na |
| chrUn | 49819416 | 49819915 | 500  | SAT1_CF | blue   | na |
| chrUn | 49819968 | 49821993 | 2026 | SAT1_CF | blue   | na |
| chrUn | 49822037 | 49822711 | 675  | SAT1_CF | blue   | na |
| chrUn | 49822723 | 49823354 | 632  | SAT1_CF | blue   | na |
| chrUn | 49823375 | 49823484 | 110  | SAT1_CF | blue   | na |
| chrUn | 49823496 | 49824015 | 520  | SAT1_CF | blue   | na |

|       |          |          |      |         |        |    |
|-------|----------|----------|------|---------|--------|----|
| chrUn | 49824036 | 49824417 | 382  | SAT1_CF | blue   | na |
| chrUn | 49824445 | 49825176 | 732  | SAT1_CF | blue   | na |
| chrUn | 49880037 | 49881091 | 1055 | CarSat1 | red    | na |
| chrUn | 49881128 | 49882105 | 978  | CarSat1 | red    | na |
| chrUn | 49882130 | 49882563 | 434  | CarSat1 | red    | na |
| chrUn | 49882600 | 49885051 | 2452 | CarSat1 | red    | na |
| chrUn | 49885080 | 49885789 | 710  | CarSat1 | red    | na |
| chrUn | 49885816 | 49886527 | 712  | CarSat1 | red    | na |
| chrUn | 49886552 | 49888734 | 2183 | CarSat1 | red    | na |
| chrUn | 49888755 | 49889469 | 715  | CarSat1 | red    | na |
| chrUn | 49889496 | 49889936 | 441  | CarSat1 | red    | na |
| chrUn | 49889966 | 49891195 | 1230 | CarSat1 | red    | na |
| chrUn | 49891220 | 49891680 | 461  | CarSat1 | red    | na |
| chrUn | 49894093 | 49895841 | 1749 | CarSat1 | red    | na |
| chrUn | 49895871 | 49896574 | 704  | CarSat1 | red    | na |
| chrUn | 49896604 | 49902481 | 5878 | CarSat1 | red    | na |
| chrUn | 49903369 | 49904115 | 747  | CarSat1 | red    | na |
| chrUn | 49904136 | 49905834 | 1699 | CarSat1 | red    | na |
| chrUn | 49905850 | 49906570 | 721  | CarSat1 | red    | na |
| chrUn | 49906586 | 49907102 | 517  | CarSat1 | red    | na |
| chrUn | 49908582 | 49909839 | 1258 | CarSat1 | red    | na |
| chrUn | 49909866 | 49910306 | 441  | CarSat1 | red    | na |
| chrUn | 49910336 | 49911036 | 701  | CarSat1 | red    | na |
| chrUn | 49911070 | 49911774 | 705  | CarSat1 | red    | na |
| chrUn | 49911804 | 49915538 | 3735 | CarSat1 | red    | na |
| chrUn | 49917835 | 49918074 | 240  | SAT1_CF | blue   | na |
| chrUn | 49919652 | 49921187 | 1536 | CarSat1 | red    | na |
| chrUn | 49921403 | 49921453 | 51   | CarSat1 | red    | na |
| chrUn | 49921644 | 49923846 | 2203 | CarSat1 | red    | na |
| chrUn | 49924011 | 49925005 | 995  | CarSat1 | red    | na |
| chrUn | 49925289 | 49925602 | 314  | CarSat1 | red    | na |
| chrUn | 49925789 | 49926789 | 1001 | CarSat1 | red    | na |
| chrUn | 49926971 | 49929345 | 2375 | CarSat1 | red    | na |
| chrUn | 49929260 | 49929693 | 434  | Carsat2 | orange | na |
| chrUn | 49929859 | 49930120 | 262  | Carsat2 | orange | na |
| chrUn | 49930310 | 49931123 | 814  | Carsat2 | orange | na |
| chrUn | 49930715 | 49933805 | 3091 | CarSat1 | red    | na |
| chrUn | 49934008 | 49935194 | 1187 | CarSat1 | red    | na |
| chrUn | 49941309 | 49943068 | 1760 | Carsat2 | orange | na |
| chrUn | 49943250 | 49944241 | 992  | Carsat2 | orange | na |
| chrUn | 50196669 | 50196905 | 237  | SAT1_CF | blue   | na |
| chrUn | 50196932 | 50197535 | 604  | SAT1_CF | blue   | na |

|       |          |          |              |      |    |
|-------|----------|----------|--------------|------|----|
| chrUn | 50197547 | 50200057 | 2511 SAT1_CF | blue | na |
| chrUn | 50200069 | 50200570 | 502 SAT1_CF  | blue | na |
| chrUn | 50200610 | 50201533 | 924 SAT1_CF  | blue | na |
| chrUn | 50201611 | 50201917 | 307 SAT1_CF  | blue | na |
| chrUn | 50201961 | 50203291 | 1331 SAT1_CF | blue | na |
| chrUn | 50203304 | 50203805 | 502 SAT1_CF  | blue | na |
| chrUn | 50203845 | 50204237 | 393 SAT1_CF  | blue | na |
| chrUn | 50204254 | 50204802 | 549 SAT1_CF  | blue | na |
| chrUn | 50204828 | 50205035 | 208 SAT1_CF  | blue | na |
| chrUn | 50205083 | 50206417 | 1335 SAT1_CF | blue | na |
| chrUn | 50206430 | 50206932 | 503 SAT1_CF  | blue | na |
| chrUn | 50207018 | 50208681 | 1664 SAT1_CF | blue | na |
| chrUn | 50209894 | 50210357 | 464 SAT1_CF  | blue | na |
| chrUn | 50210402 | 50210558 | 157 SAT1_CF  | blue | na |
| chrUn | 50210624 | 50211714 | 1091 SAT1_CF | blue | na |
| chrUn | 50213207 | 50213678 | 472 SAT1_CF  | blue | na |
| chrUn | 50213691 | 50214192 | 502 SAT1_CF  | blue | na |
| chrUn | 50214205 | 50216016 | 1812 SAT1_CF | blue | na |
| chrUn | 50216096 | 50216770 | 675 SAT1_CF  | blue | na |
| chrUn | 50216782 | 50217485 | 704 SAT1_CF  | blue | na |
| chrUn | 50217498 | 50218333 | 836 SAT1_CF  | blue | na |
| chrUn | 50218346 | 50219663 | 1318 SAT1_CF | blue | na |
| chrUn | 50219675 | 50220188 | 514 SAT1_CF  | blue | na |
| chrUn | 50220214 | 50220746 | 533 SAT1_CF  | blue | na |
| chrUn | 50220796 | 50221522 | 727 SAT1_CF  | blue | na |
| chrUn | 50221565 | 50222241 | 677 SAT1_CF  | blue | na |
| chrUn | 50222253 | 50222854 | 602 SAT1_CF  | blue | na |
| chrUn | 50222865 | 50223543 | 679 SAT1_CF  | blue | na |
| chrUn | 50223555 | 50224243 | 689 SAT1_CF  | blue | na |
| chrUn | 50224257 | 50225317 | 1061 SAT1_CF | blue | na |
| chrUn | 50225350 | 50225897 | 548 SAT1_CF  | blue | na |
| chrUn | 50225911 | 50226611 | 701 SAT1_CF  | blue | na |
| chrUn | 50226631 | 50227734 | 1104 SAT1_CF | blue | na |
| chrUn | 50227746 | 50228301 | 556 SAT1_CF  | blue | na |
| chrUn | 50228356 | 50228949 | 594 SAT1_CF  | blue | na |
| chrUn | 50229060 | 50229155 | 96 SAT1_CF   | blue | na |
| chrUn | 50230195 | 50230892 | 698 SAT1_CF  | blue | na |
| chrUn | 50230935 | 50231832 | 898 SAT1_CF  | blue | na |
| chrUn | 50231867 | 50232681 | 815 SAT1_CF  | blue | na |
| chrUn | 50232708 | 50233227 | 520 SAT1_CF  | blue | na |
| chrUn | 50233846 | 50234497 | 652 SAT1_CF  | blue | na |
| chrUn | 50234525 | 50235307 | 783 SAT1_CF  | blue | na |

|       |          |          |              |      |    |
|-------|----------|----------|--------------|------|----|
| chrUn | 50235325 | 50235824 | 500 SAT1_CF  | blue | na |
| chrUn | 50235877 | 50236920 | 1044 SAT1_CF | blue | na |
| chrUn | 50236967 | 50238020 | 1054 SAT1_CF | blue | na |
| chrUn | 50238033 | 50238215 | 183 SAT1_CF  | blue | na |
| chrUn | 50238255 | 50238801 | 547 SAT1_CF  | blue | na |
| chrUn | 50238814 | 50238930 | 117 SAT1_CF  | blue | na |
| chrUn | 50238942 | 50239613 | 672 SAT1_CF  | blue | na |
| chrUn | 50239636 | 50240136 | 501 SAT1_CF  | blue | na |
| chrUn | 50240189 | 50240615 | 427 SAT1_CF  | blue | na |
| chrUn | 50240649 | 50241427 | 779 SAT1_CF  | blue | na |
| chrUn | 50241440 | 50241556 | 117 SAT1_CF  | blue | na |
| chrUn | 50241568 | 50242121 | 554 SAT1_CF  | blue | na |
| chrUn | 50242191 | 50242522 | 332 SAT1_CF  | blue | na |
| chrUn | 50244915 | 50245449 | 535 SAT1_CF  | blue | na |
| chrUn | 50245502 | 50246025 | 524 SAT1_CF  | blue | na |
| chrUn | 50247969 | 50248508 | 540 SAT1_CF  | blue | na |
| chrUn | 50248529 | 50248638 | 110 SAT1_CF  | blue | na |
| chrUn | 50248650 | 50249408 | 759 SAT1_CF  | blue | na |
| chrUn | 50249422 | 50249924 | 503 SAT1_CF  | blue | na |
| chrUn | 50249969 | 50250066 | 98 SAT1_CF   | blue | na |
| chrUn | 50250876 | 50251673 | 798 SAT1_CF  | blue | na |
| chrUn | 50251740 | 50252522 | 783 SAT1_CF  | blue | na |
| chrUn | 50252557 | 50253621 | 1065 SAT1_CF | blue | na |
| chrUn | 50253643 | 50253715 | 73 SAT1_CF   | blue | na |
| chrUn | 50253728 | 50254458 | 731 SAT1_CF  | blue | na |
| chrUn | 50255492 | 50256094 | 603 SAT1_CF  | blue | na |
| chrUn | 50256107 | 50257801 | 1695 SAT1_CF | blue | na |
| chrUn | 50257964 | 50258777 | 814 SAT1_CF  | blue | na |
| chrUn | 50258804 | 50259305 | 502 SAT1_CF  | blue | na |
| chrUn | 50259351 | 50260473 | 1123 SAT1_CF | blue | na |
| chrUn | 50263540 | 50264205 | 666 SAT1_CF  | blue | na |
| chrUn | 50264249 | 50264922 | 674 SAT1_CF  | blue | na |
| chrUn | 50264934 | 50265625 | 692 SAT1_CF  | blue | na |
| chrUn | 50265638 | 50266181 | 544 SAT1_CF  | blue | na |
| chrUn | 50266224 | 50266767 | 544 SAT1_CF  | blue | na |
| chrUn | 50266793 | 50267591 | 799 SAT1_CF  | blue | na |
| chrUn | 50267604 | 50269228 | 1625 SAT1_CF | blue | na |
| chrUn | 50270980 | 50271104 | 125 SAT1_CF  | blue | na |
| chrUn | 50271116 | 50271674 | 559 SAT1_CF  | blue | na |
| chrUn | 50271696 | 50271802 | 107 SAT1_CF  | blue | na |
| chrUn | 50271815 | 50272317 | 503 SAT1_CF  | blue | na |
| chrUn | 50273440 | 50274265 | 826 CarSat1  | red  | na |

|       |          |          |      |         |        |    |
|-------|----------|----------|------|---------|--------|----|
| chrUn | 50274295 | 50275003 | 709  | CarSat1 | red    | na |
| chrUn | 50275033 | 50282933 | 7901 | CarSat1 | red    | na |
| chrUn | 50282966 | 50285882 | 2917 | CarSat1 | red    | na |
| chrUn | 50285914 | 50287579 | 1666 | CarSat1 | red    | na |
| chrUn | 50287594 | 50287721 | 128  | Carsat2 | orange | na |
| chrUn | 50287609 | 50291777 | 4169 | CarSat1 | red    | na |
| chrUn | 50291789 | 50293982 | 2194 | CarSat1 | red    | na |
| chrUn | 50294015 | 50294475 | 461  | CarSat1 | red    | na |
| chrUn | 50294492 | 50300080 | 5589 | CarSat1 | red    | na |
| chrUn | 50300121 | 50300851 | 731  | CarSat1 | red    | na |
| chrUn | 50301134 | 50301767 | 634  | CarSat1 | red    | na |
| chrUn | 50301800 | 50302499 | 700  | CarSat1 | red    | na |
| chrUn | 50302524 | 50303886 | 1363 | CarSat1 | red    | na |
| chrUn | 50327121 | 50328337 | 1217 | Sat2CF  | purple | na |
| chrUn | 50327249 | 50328332 | 1084 | Sat2CF  | purple | na |
| chrUn | 50328208 | 50328357 | 150  | Sat2CF  | purple | na |
| chrUn | 50355719 | 50357275 | 1557 | CarSat1 | red    | na |
| chrUn | 50357296 | 50358893 | 1598 | CarSat1 | red    | na |
| chrUn | 50358914 | 50360508 | 1595 | CarSat1 | red    | na |
| chrUn | 50368092 | 50368197 | 106  | SAT1_CF | blue   | na |
| chrUn | 50369585 | 50370310 | 726  | SAT1_CF | blue   | na |
| chrUn | 50370353 | 50372168 | 1816 | SAT1_CF | blue   | na |
| chrUn | 50372200 | 50372981 | 782  | SAT1_CF | blue   | na |
| chrUn | 50372995 | 50373941 | 947  | SAT1_CF | blue   | na |
| chrUn | 50373954 | 50374436 | 483  | SAT1_CF | blue   | na |
| chrUn | 50374495 | 50375802 | 1308 | SAT1_CF | blue   | na |
| chrUn | 50375815 | 50377807 | 1993 | SAT1_CF | blue   | na |
| chrUn | 50377834 | 50379073 | 1240 | SAT1_CF | blue   | na |
| chrUn | 50379188 | 50380692 | 1505 | SAT1_CF | blue   | na |
| chrUn | 50380704 | 50381335 | 632  | SAT1_CF | blue   | na |
| chrUn | 50381356 | 50381465 | 110  | SAT1_CF | blue   | na |
| chrUn | 50381477 | 50381978 | 502  | SAT1_CF | blue   | na |
| chrUn | 50382023 | 50382180 | 158  | SAT1_CF | blue   | na |
| chrUn | 50382208 | 50384161 | 1954 | SAT1_CF | blue   | na |
| chrUn | 50384196 | 50384676 | 481  | SAT1_CF | blue   | na |
| chrUn | 50384702 | 50385765 | 1064 | SAT1_CF | blue   | na |
| chrUn | 50385783 | 50386263 | 481  | SAT1_CF | blue   | na |
| chrUn | 50386330 | 50388806 | 2477 | SAT1_CF | blue   | na |
| chrUn | 50388841 | 50391344 | 2504 | SAT1_CF | blue   | na |
| chrUn | 50391356 | 50391858 | 503  | SAT1_CF | blue   | na |
| chrUn | 50391913 | 50393933 | 2021 | SAT1_CF | blue   | na |
| chrUn | 50393976 | 50394651 | 676  | SAT1_CF | blue   | na |



|       |          |          |               |        |    |
|-------|----------|----------|---------------|--------|----|
| chrUn | 50394663 | 50395356 | 694 SAT1_CF   | blue   | na |
| chrUn | 50395378 | 50396176 | 799 SAT1_CF   | blue   | na |
| chrUn | 50396219 | 50397911 | 1693 SAT1_CF  | blue   | na |
| chrUn | 50397924 | 50398567 | 644 SAT1_CF   | blue   | na |
| chrUn | 50399572 | 50400641 | 1070 CarSat1  | red    | na |
| chrUn | 50400665 | 50401601 | 937 CarSat1   | red    | na |
| chrUn | 50401631 | 50403343 | 1713 CarSat1  | red    | na |
| chrUn | 50403370 | 50405810 | 2441 CarSat1  | red    | na |
| chrUn | 50405826 | 50406759 | 934 CarSat1   | red    | na |
| chrUn | 50406774 | 50406901 | 128 Carsat2   | orange | na |
| chrUn | 50406789 | 50407497 | 709 CarSat1   | red    | na |
| chrUn | 50407512 | 50407639 | 128 Carsat2   | orange | na |
| chrUn | 50407527 | 50408504 | 978 CarSat1   | red    | na |
| chrUn | 50408531 | 50410733 | 2203 CarSat1  | red    | na |
| chrUn | 50410760 | 50411471 | 712 CarSat1   | red    | na |
| chrUn | 50411498 | 50413684 | 2187 CarSat1  | red    | na |
| chrUn | 50413711 | 50414407 | 697 CarSat1   | red    | na |
| chrUn | 50414449 | 50415413 | 965 CarSat1   | red    | na |
| chrUn | 50415429 | 50417373 | 1945 CarSat1  | red    | na |
| chrUn | 50417398 | 50418360 | 963 CarSat1   | red    | na |
| chrUn | 50418385 | 50418845 | 461 CarSat1   | red    | na |
| chrUn | 50418872 | 50419566 | 695 CarSat1   | red    | na |
| chrUn | 50419607 | 50420298 | 692 CarSat1   | red    | na |
| chrUn | 50420340 | 50421050 | 711 CarSat1   | red    | na |
| chrUn | 50421077 | 50423262 | 2186 CarSat1  | red    | na |
| chrUn | 50423289 | 50423996 | 708 CarSat1   | red    | na |
| chrUn | 50424027 | 50426681 | 2655 CarSat1  | red    | na |
| chrUn | 50426711 | 50427689 | 979 CarSat1   | red    | na |
| chrUn | 50427716 | 50428677 | 962 CarSat1   | red    | na |
| chrUn | 50428693 | 50430208 | 1516 CarSat1  | red    | na |
| chrUn | 50464023 | 50464904 | 882 CarSat1   | red    | na |
| chrUn | 50464931 | 50469075 | 4145 CarSat1  | red    | na |
| chrUn | 50469099 | 50480852 | 11754 CarSat1 | red    | na |
| chrUn | 50480883 | 50481814 | 932 CarSat1   | red    | na |
| chrUn | 50482253 | 50485968 | 3716 CarSat1  | red    | na |
| chrUn | 50486001 | 50487699 | 1699 CarSat1  | red    | na |
| chrUn | 50487720 | 50489182 | 1463 CarSat1  | red    | na |
| chrUn | 50489211 | 50489337 | 127 CarSat1   | red    | na |
| chrUn | 50489414 | 50493464 | 4051 CarSat1  | red    | na |
| chrUn | 50493488 | 50494708 | 1221 CarSat1  | red    | na |
| chrUn | 50495744 | 50496769 | 1026 CarSat1  | red    | na |
| chrUn | 50496784 | 50498498 | 1715 CarSat1  | red    | na |

|       |          |          |      |         |        |    |
|-------|----------|----------|------|---------|--------|----|
| chrUn | 50499379 | 50499968 | 590  | CarSat1 | red    | na |
| chrUn | 50500001 | 50500714 | 714  | CarSat1 | red    | na |
| chrUn | 50500738 | 50501510 | 773  | CarSat1 | red    | na |
| chrUn | 50503755 | 50504886 | 1132 | CarSat1 | red    | na |
| chrUn | 50507048 | 50508116 | 1069 | CarSat1 | red    | na |
| chrUn | 50508146 | 50508869 | 724  | CarSat1 | red    | na |
| chrUn | 50508884 | 50509449 | 566  | CarSat1 | red    | na |
| chrUn | 50512535 | 50514108 | 1574 | CarSat1 | red    | na |
| chrUn | 50514138 | 50516093 | 1956 | CarSat1 | red    | na |
| chrUn | 50516225 | 50517502 | 1278 | CarSat1 | red    | na |
| chrUn | 50518143 | 50518782 | 640  | CarSat1 | red    | na |
| chrUn | 50518797 | 50519508 | 712  | CarSat1 | red    | na |
| chrUn | 50519538 | 50520192 | 655  | CarSat1 | red    | na |
| chrUn | 50521834 | 50523610 | 1777 | CarSat1 | red    | na |
| chrUn | 50523625 | 50524187 | 563  | CarSat1 | red    | na |
| chrUn | 50526766 | 50528240 | 1475 | CarSat1 | red    | na |
| chrUn | 50528270 | 50532381 | 4112 | CarSat1 | red    | na |
| chrUn | 50533016 | 50533269 | 254  | SAT1_CF | blue   | na |
| chrUn | 50533281 | 50534409 | 1129 | SAT1_CF | blue   | na |
| chrUn | 50536910 | 50538558 | 1649 | SAT1_CF | blue   | na |
| chrUn | 50538598 | 50539957 | 1360 | SAT1_CF | blue   | na |
| chrUn | 50542837 | 50544575 | 1739 | SAT1_CF | blue   | na |
| chrUn | 50544618 | 50545208 | 591  | SAT1_CF | blue   | na |
| chrUn | 50546233 | 50547636 | 1404 | CarSat1 | red    | na |
| chrUn | 50547660 | 50552330 | 4671 | CarSat1 | red    | na |
| chrUn | 50552360 | 50554318 | 1959 | CarSat1 | red    | na |
| chrUn | 50554330 | 50555549 | 1220 | CarSat1 | red    | na |
| chrUn | 50555704 | 50557232 | 1529 | CarSat1 | red    | na |
| chrUn | 50557244 | 50563125 | 5882 | CarSat1 | red    | na |
| chrUn | 50563149 | 50566946 | 3798 | CarSat1 | red    | na |
| chrUn | 50568044 | 50568536 | 493  | CarSat1 | red    | na |
| chrUn | 50568552 | 50569021 | 470  | CarSat1 | red    | na |
| chrUn | 50569048 | 50570984 | 1937 | CarSat1 | red    | na |
| chrUn | 50570997 | 50573449 | 2453 | CarSat1 | red    | na |
| chrUn | 50573476 | 50574185 | 710  | CarSat1 | red    | na |
| chrUn | 50574212 | 50575902 | 1691 | CarSat1 | red    | na |
| chrUn | 50575927 | 50576855 | 929  | CarSat1 | red    | na |
| chrUn | 50576892 | 50577588 | 697  | CarSat1 | red    | na |
| chrUn | 50616412 | 50617627 | 1216 | Sat2CF  | purple | na |
| chrUn | 50616540 | 50617622 | 1083 | Sat2CF  | purple | na |
| chrUn | 50678695 | 50679225 | 531  | SAT1_CF | blue   | na |
| chrUn | 50679343 | 50679862 | 520  | SAT1_CF | blue   | na |

|       |          |          |              |        |    |
|-------|----------|----------|--------------|--------|----|
| chrUn | 50679919 | 50680545 | 627 SAT1_CF  | blue   | na |
| chrUn | 50680580 | 50681743 | 1164 SAT1_CF | blue   | na |
| chrUn | 50681758 | 50681894 | 137 SAT1_CF  | blue   | na |
| chrUn | 50681990 | 50682509 | 520 SAT1_CF  | blue   | na |
| chrUn | 50682566 | 50683192 | 627 SAT1_CF  | blue   | na |
| chrUn | 50683227 | 50684390 | 1164 SAT1_CF | blue   | na |
| chrUn | 50684405 | 50684541 | 137 SAT1_CF  | blue   | na |
| chrUn | 50684637 | 50685156 | 520 SAT1_CF  | blue   | na |
| chrUn | 50685213 | 50686381 | 1169 SAT1_CF | blue   | na |
| chrUn | 50686467 | 50688159 | 1693 SAT1_CF | blue   | na |
| chrUn | 50688176 | 50688855 | 680 SAT1_CF  | blue   | na |
| chrUn | 50688868 | 50688943 | 76 SAT1_CF   | blue   | na |
| chrUn | 50688961 | 50689480 | 520 SAT1_CF  | blue   | na |
| chrUn | 50689492 | 50690351 | 860 SAT1_CF  | blue   | na |
| chrUn | 50690394 | 50691173 | 780 SAT1_CF  | blue   | na |
| chrUn | 50691251 | 50692159 | 909 SAT1_CF  | blue   | na |
| chrUn | 50692246 | 50692747 | 502 SAT1_CF  | blue   | na |
| chrUn | 50692760 | 50693606 | 847 SAT1_CF  | blue   | na |
| chrUn | 50693628 | 50694166 | 539 SAT1_CF  | blue   | na |
| chrUn | 50694214 | 50695939 | 1726 SAT1_CF | blue   | na |
| chrUn | 50695969 | 50698234 | 2266 SAT1_CF | blue   | na |
| chrUn | 50698264 | 50698646 | 383 SAT1_CF  | blue   | na |
| chrUn | 50698684 | 50699181 | 498 SAT1_CF  | blue   | na |
| chrUn | 50699199 | 50699302 | 104 SAT1_CF  | blue   | na |
| chrUn | 50699323 | 50699897 | 575 SAT1_CF  | blue   | na |
| chrUn | 50699909 | 50700569 | 661 SAT1_CF  | blue   | na |
| chrUn | 50700617 | 50701150 | 534 SAT1_CF  | blue   | na |
| chrUn | 50701179 | 50701844 | 666 SAT1_CF  | blue   | na |
| chrUn | 50701888 | 50702390 | 503 SAT1_CF  | blue   | na |
| chrUn | 50702417 | 50703260 | 844 SAT1_CF  | blue   | na |
| chrUn | 50703449 | 50704647 | 1199 SAT1_CF | blue   | na |
| chrUn | 50704665 | 50705335 | 671 SAT1_CF  | blue   | na |
| chrUn | 50705378 | 50706993 | 1616 SAT1_CF | blue   | na |
| chrUn | 50707014 | 50707409 | 396 SAT1_CF  | blue   | na |
| chrUn | 50707449 | 50707949 | 501 SAT1_CF  | blue   | na |
| chrUn | 50707967 | 50708720 | 754 SAT1_CF  | blue   | na |
| chrUn | 50709735 | 50710228 | 494 CarSat1  | red    | na |
| chrUn | 50710244 | 50711178 | 935 CarSat1  | red    | na |
| chrUn | 50711193 | 50711320 | 128 Carsat2  | orange | na |
| chrUn | 50711208 | 50714121 | 2914 CarSat1 | red    | na |
| chrUn | 50714136 | 50714263 | 128 Carsat2  | orange | na |
| chrUn | 50714151 | 50716113 | 1963 CarSat1 | red    | na |

|       |          |          |      |         |        |    |
|-------|----------|----------|------|---------|--------|----|
| chrUn | 50716137 | 50718327 | 2191 | CarSat1 | red    | na |
| chrUn | 50718360 | 50719556 | 1197 | CarSat1 | red    | na |
| chrUn | 50719576 | 50720763 | 1188 | CarSat1 | red    | na |
| chrUn | 50720793 | 50723245 | 2453 | CarSat1 | red    | na |
| chrUn | 50723265 | 50724974 | 1710 | CarSat1 | red    | na |
| chrUn | 50724999 | 50725925 | 927  | CarSat1 | red    | na |
| chrUn | 50725940 | 50726066 | 127  | Carsat2 | orange | na |
| chrUn | 50725955 | 50726659 | 705  | CarSat1 | red    | na |
| chrUn | 50726689 | 50727911 | 1223 | CarSat1 | red    | na |
| chrUn | 50727935 | 50730856 | 2922 | CarSat1 | red    | na |
| chrUn | 50730880 | 50731596 | 717  | CarSat1 | red    | na |
| chrUn | 50731620 | 50732230 | 611  | CarSat1 | red    | na |
| chrUn | 50732608 | 50733435 | 828  | CarSat1 | red    | na |
| chrUn | 50733465 | 50733951 | 487  | CarSat1 | red    | na |
| chrUn | 50733975 | 50736383 | 2409 | CarSat1 | red    | na |
| chrUn | 50736398 | 50736524 | 127  | Carsat2 | orange | na |
| chrUn | 50736413 | 50738596 | 2184 | CarSat1 | red    | na |
| chrUn | 50738626 | 50739111 | 486  | CarSat1 | red    | na |
| chrUn | 50739135 | 50740194 | 1060 | CarSat1 | red    | na |
| chrUn | 50742711 | 50743783 | 1073 | Sat2CF  | purple | na |
| chrUn | 50764200 | 50764714 | 515  | Sat2CF  | purple | na |
| chrUn | 50764262 | 50765110 | 849  | Sat2CF  | purple | na |
| chrUn | 50764486 | 50765185 | 700  | Sat2CF  | purple | na |
| chrUn | 50791958 | 50793141 | 1184 | Sat2CF  | purple | na |
| chrUn | 50799935 | 50801184 | 1250 | Sat2CF  | purple | na |
| chrUn | 50803815 | 50804749 | 935  | CarSat1 | red    | na |
| chrUn | 50804938 | 50805507 | 570  | CarSat1 | red    | na |
| chrUn | 50812885 | 50815112 | 2228 | CarSat1 | red    | na |
| chrUn | 50815131 | 50815533 | 403  | CarSat1 | red    | na |
| chrUn | 50815562 | 50816937 | 1376 | SAT1_CF | blue   | na |
| chrUn | 50817132 | 50817292 | 161  | Sat2CF  | purple | na |
| chrUn | 50817165 | 50818113 | 949  | Sat2CF  | purple | na |
| chrUn | 50817797 | 50818174 | 378  | Sat2CF  | purple | na |
| chrUn | 50824190 | 50826417 | 2228 | CarSat1 | red    | na |
| chrUn | 50826436 | 50826838 | 403  | CarSat1 | red    | na |
| chrUn | 50826867 | 50828242 | 1376 | SAT1_CF | blue   | na |
| chrUn | 50855835 | 50856695 | 861  | CarSat1 | red    | na |
| chrUn | 50856716 | 50856984 | 269  | CarSat1 | red    | na |
| chrUn | 50912100 | 50913270 | 1171 | SAT1_CF | blue   | na |
| chrUn | 50913309 | 50914644 | 1336 | SAT1_CF | blue   | na |
| chrUn | 50914711 | 50915231 | 521  | SAT1_CF | blue   | na |
| chrUn | 50915244 | 50915646 | 403  | SAT1_CF | blue   | na |

|       |          |          |              |      |    |
|-------|----------|----------|--------------|------|----|
| chrUn | 50915686 | 50916188 | 503 SAT1_CF  | blue | na |
| chrUn | 50916201 | 50918082 | 1882 SAT1_CF | blue | na |
| chrUn | 50918199 | 50918762 | 564 SAT1_CF  | blue | na |
| chrUn | 50918804 | 50919583 | 780 SAT1_CF  | blue | na |
| chrUn | 50919627 | 50920171 | 545 SAT1_CF  | blue | na |
| chrUn | 50920184 | 50920587 | 404 SAT1_CF  | blue | na |
| chrUn | 50920625 | 50921127 | 503 SAT1_CF  | blue | na |
| chrUn | 50921154 | 50922562 | 1409 SAT1_CF | blue | na |
| chrUn | 50922600 | 50923828 | 1229 SAT1_CF | blue | na |
| chrUn | 50923945 | 50924465 | 521 SAT1_CF  | blue | na |
| chrUn | 50924496 | 50924689 | 194 SAT1_CF  | blue | na |
| chrUn | 50924717 | 50926502 | 1786 SAT1_CF | blue | na |
| chrUn | 50926555 | 50927056 | 502 SAT1_CF  | blue | na |
| chrUn | 50927067 | 50928176 | 1110 SAT1_CF | blue | na |
| chrUn | 50928216 | 50928717 | 502 SAT1_CF  | blue | na |
| chrUn | 50928730 | 50929575 | 846 SAT1_CF  | blue | na |
| chrUn | 50929598 | 50930748 | 1151 SAT1_CF | blue | na |
| chrUn | 50930778 | 50931338 | 561 SAT1_CF  | blue | na |
| chrUn | 50931425 | 50931925 | 501 SAT1_CF  | blue | na |
| chrUn | 50931938 | 50933240 | 1303 SAT1_CF | blue | na |
| chrUn | 50933282 | 50934687 | 1406 SAT1_CF | blue | na |
| chrUn | 50934698 | 50935388 | 691 SAT1_CF  | blue | na |
| chrUn | 50935432 | 50936128 | 697 SAT1_CF  | blue | na |
| chrUn | 50936142 | 50936918 | 777 SAT1_CF  | blue | na |
| chrUn | 50936971 | 50937492 | 522 SAT1_CF  | blue | na |
| chrUn | 50937519 | 50938836 | 1318 SAT1_CF | blue | na |
| chrUn | 50938854 | 50939455 | 602 SAT1_CF  | blue | na |
| chrUn | 50939467 | 50940967 | 1501 SAT1_CF | blue | na |
| chrUn | 50941053 | 50941548 | 496 SAT1_CF  | blue | na |
| chrUn | 50941568 | 50941903 | 336 SAT1_CF  | blue | na |
| chrUn | 50942943 | 50944718 | 1776 CarSat1 | red  | na |
| chrUn | 50944748 | 50945460 | 713 CarSat1  | red  | na |
| chrUn | 50945490 | 50947672 | 2183 CarSat1 | red  | na |
| chrUn | 50947703 | 50949159 | 1457 CarSat1 | red  | na |
| chrUn | 50949174 | 50952345 | 3172 CarSat1 | red  | na |
| chrUn | 50952378 | 50955966 | 3589 CarSat1 | red  | na |
| chrUn | 50959048 | 50960465 | 1418 CarSat1 | red  | na |
| chrUn | 50960489 | 50961205 | 717 CarSat1  | red  | na |
| chrUn | 50961229 | 50961942 | 714 CarSat1  | red  | na |
| chrUn | 50961966 | 50962680 | 715 CarSat1  | red  | na |
| chrUn | 50962704 | 50964818 | 2115 CarSat1 | red  | na |
| chrUn | 50965292 | 50966350 | 1059 CarSat1 | red  | na |

|       |          |          |      |         |        |    |
|-------|----------|----------|------|---------|--------|----|
| chrUn | 50966374 | 50967338 | 965  | CarSat1 | red    | na |
| chrUn | 50967363 | 50969092 | 1730 | CarSat1 | red    | na |
| chrUn | 50969107 | 50970570 | 1464 | CarSat1 | red    | na |
| chrUn | 50970585 | 50971307 | 723  | CarSat1 | red    | na |
| chrUn | 50971322 | 50972044 | 723  | CarSat1 | red    | na |
| chrUn | 50972059 | 50972781 | 723  | CarSat1 | red    | na |
| chrUn | 50972796 | 50973731 | 936  | CarSat1 | red    | na |
| chrUn | 50973747 | 50975465 | 1719 | CarSat1 | red    | na |
| chrUn | 50975476 | 50976207 | 732  | CarSat1 | red    | na |
| chrUn | 50977225 | 50978726 | 1502 | CarSat1 | red    | na |
| chrUn | 50980616 | 50981517 | 902  | CarSat1 | red    | na |
| chrUn | 50981547 | 50982874 | 1328 | CarSat1 | red    | na |
| chrUn | 50983897 | 50985063 | 1167 | CarSat1 | red    | na |
| chrUn | 50985090 | 50985678 | 589  | CarSat1 | red    | na |
| chrUn | 50985810 | 50986427 | 618  | CarSat1 | red    | na |
| chrUn | 50986457 | 50986943 | 487  | CarSat1 | red    | na |
| chrUn | 50986967 | 50987998 | 1032 | CarSat1 | red    | na |
| chrUn | 50988034 | 50989534 | 1501 | CarSat1 | red    | na |
| chrUn | 50989564 | 50990271 | 708  | CarSat1 | red    | na |
| chrUn | 50990286 | 50990412 | 127  | Carsat2 | orange | na |
| chrUn | 50990301 | 50991012 | 712  | CarSat1 | red    | na |
| chrUn | 50991042 | 50992859 | 1818 | CarSat1 | red    | na |
| chrUn | 50993251 | 50993736 | 486  | CarSat1 | red    | na |
| chrUn | 50993760 | 50994478 | 719  | CarSat1 | red    | na |
| chrUn | 50994502 | 50996165 | 1664 | CarSat1 | red    | na |
| chrUn | 50996994 | 50999074 | 2081 | CarSat1 | red    | na |
| chrUn | 51000629 | 51002146 | 1518 | CarSat1 | red    | na |
| chrUn | 51004454 | 51005747 | 1294 | CarSat1 | red    | na |
| chrUn | 51007065 | 51007548 | 484  | CarSat1 | red    | na |
| chrUn | 51007578 | 51008940 | 1363 | CarSat1 | red    | na |
| chrUn | 51012023 | 51013090 | 1068 | CarSat1 | red    | na |
| chrUn | 51013114 | 51014411 | 1298 | CarSat1 | red    | na |
| chrUn | 51015696 | 51017792 | 2097 | CarSat1 | red    | na |
| chrUn | 51018163 | 51018866 | 704  | CarSat1 | red    | na |
| chrUn | 51018900 | 51020775 | 1876 | CarSat1 | red    | na |
| chrUn | 51056451 | 51059302 | 2852 | CarSat1 | red    | na |
| chrUn | 51059327 | 51060777 | 1451 | CarSat1 | red    | na |
| chrUn | 51060802 | 51061999 | 1198 | CarSat1 | red    | na |
| chrUn | 51062026 | 51062459 | 434  | CarSat1 | red    | na |
| chrUn | 51062725 | 51064208 | 1484 | CarSat1 | red    | na |
| chrUn | 51064235 | 51066671 | 2437 | CarSat1 | red    | na |
| chrUn | 51066696 | 51069364 | 2669 | CarSat1 | red    | na |

|       |          |          |      |         |        |    |
|-------|----------|----------|------|---------|--------|----|
| chrUn | 51069391 | 51071090 | 1700 | CarSat1 | red    | na |
| chrUn | 51071115 | 51071823 | 709  | CarSat1 | red    | na |
| chrUn | 51071848 | 51073032 | 1185 | CarSat1 | red    | na |
| chrUn | 51073059 | 51074022 | 964  | CarSat1 | red    | na |
| chrUn | 51074038 | 51076224 | 2187 | CarSat1 | red    | na |
| chrUn | 51077400 | 51079430 | 2031 | CarSat1 | red    | na |
| chrUn | 51081007 | 51082793 | 1787 | CarSat1 | red    | na |
| chrUn | 51082809 | 51083277 | 469  | CarSat1 | red    | na |
| chrUn | 51083304 | 51084014 | 711  | CarSat1 | red    | na |
| chrUn | 51084044 | 51084751 | 708  | CarSat1 | red    | na |
| chrUn | 51084776 | 51085487 | 712  | CarSat1 | red    | na |
| chrUn | 51085514 | 51086960 | 1447 | CarSat1 | red    | na |
| chrUn | 51086987 | 51088190 | 1204 | CarSat1 | red    | na |
| chrUn | 51088217 | 51088972 | 756  | CarSat1 | red    | na |
| chrUn | 51098841 | 51099222 | 382  | Sat2CF  | purple | na |
| chrUn | 51098900 | 51099744 | 845  | Sat2CF  | purple | na |
| chrUn | 51098976 | 51099830 | 855  | Sat2CF  | purple | na |
| chrUn | 51099705 | 51099865 | 161  | Sat2CF  | purple | na |
| chrUn | 51100059 | 51101437 | 1379 | SAT1_CF | blue   | na |
| chrUn | 51101466 | 51103339 | 1874 | CarSat1 | red    | na |
| chrUn | 51103360 | 51104217 | 858  | CarSat1 | red    | na |
| chrUn | 51104238 | 51105737 | 1500 | CarSat1 | red    | na |
| chrUn | 51105757 | 51106430 | 674  | CarSat1 | red    | na |
| chrUn | 51112324 | 51112381 | 58   | CarSat1 | red    | na |
| chrUn | 51112395 | 51112796 | 402  | CarSat1 | red    | na |
| chrUn | 51112826 | 51115200 | 2375 | CarSat1 | red    | na |
| chrUn | 51121637 | 51123083 | 1447 | CarSat1 | red    | na |
| chrUn | 51123435 | 51124679 | 1245 | CarSat1 | red    | na |
| chrUn | 51124711 | 51125590 | 880  | CarSat1 | red    | na |
| chrUn | 51125585 | 51127129 | 1545 | SAT1_CF | blue   | na |
| chrUn | 51127171 | 51128220 | 1050 | SAT1_CF | blue   | na |
| chrUn | 51134295 | 51134972 | 678  | SAT1_CF | blue   | na |
| chrUn | 51134990 | 51135780 | 791  | SAT1_CF | blue   | na |
| chrUn | 51135809 | 51136322 | 514  | SAT1_CF | blue   | na |
| chrUn | 51136400 | 51137976 | 1577 | SAT1_CF | blue   | na |
| chrUn | 51138020 | 51139379 | 1360 | SAT1_CF | blue   | na |
| chrUn | 51139394 | 51141538 | 2145 | SAT1_CF | blue   | na |
| chrUn | 51141557 | 51142559 | 1003 | SAT1_CF | blue   | na |
| chrUn | 51142564 | 51143749 | 1186 | CarSat1 | red    | na |
| chrUn | 51143764 | 51145276 | 1513 | CarSat1 | red    | na |
| chrUn | 51145297 | 51146283 | 987  | CarSat1 | red    | na |
| chrUn | 51151027 | 51151468 | 442  | SAT1_CF | blue   | na |

|       |          |          |              |        |    |
|-------|----------|----------|--------------|--------|----|
| chrUn | 51151545 | 51152140 | 596 SAT1_CF  | blue   | na |
| chrUn | 51153593 | 51154772 | 1180 SAT1_CF | blue   | na |
| chrUn | 51154798 | 51155463 | 666 SAT1_CF  | blue   | na |
| chrUn | 51155481 | 51155978 | 498 SAT1_CF  | blue   | na |
| chrUn | 51156022 | 51156145 | 124 SAT1_CF  | blue   | na |
| chrUn | 51156859 | 51157015 | 157 SAT1_CF  | blue   | na |
| chrUn | 51157029 | 51158462 | 1434 SAT1_CF | blue   | na |
| chrUn | 51158504 | 51159362 | 859 SAT1_CF  | blue   | na |
| chrUn | 51159374 | 51160173 | 800 SAT1_CF  | blue   | na |
| chrUn | 51160185 | 51160860 | 676 SAT1_CF  | blue   | na |
| chrUn | 51160872 | 51161371 | 500 SAT1_CF  | blue   | na |
| chrUn | 51161411 | 51161592 | 182 SAT1_CF  | blue   | na |
| chrUn | 51161774 | 51162163 | 390 SAT1_CF  | blue   | na |
| chrUn | 51163301 | 51164025 | 725 SAT1_CF  | blue   | na |
| chrUn | 51164037 | 51164146 | 110 SAT1_CF  | blue   | na |
| chrUn | 51164166 | 51164435 | 270 SAT1_CF  | blue   | na |
| chrUn | 51165153 | 51165779 | 627 SAT1_CF  | blue   | na |
| chrUn | 51165801 | 51165939 | 139 SAT1_CF  | blue   | na |
| chrUn | 51165952 | 51166453 | 502 SAT1_CF  | blue   | na |
| chrUn | 51166466 | 51167148 | 683 SAT1_CF  | blue   | na |
| chrUn | 51167160 | 51169326 | 2167 SAT1_CF | blue   | na |
| chrUn | 51169371 | 51169872 | 502 SAT1_CF  | blue   | na |
| chrUn | 51169884 | 51169992 | 109 SAT1_CF  | blue   | na |
| chrUn | 51170015 | 51170891 | 877 SAT1_CF  | blue   | na |
| chrUn | 51172055 | 51172619 | 565 SAT1_CF  | blue   | na |
| chrUn | 51173463 | 51173611 | 149 SAT1_CF  | blue   | na |
| chrUn | 51173624 | 51174229 | 606 SAT1_CF  | blue   | na |
| chrUn | 51175796 | 51176382 | 587 SAT1_CF  | blue   | na |
| chrUn | 51176397 | 51178671 | 2275 SAT1_CF | blue   | na |
| chrUn | 51178714 | 51179382 | 669 SAT1_CF  | blue   | na |
| chrUn | 51179394 | 51180591 | 1198 SAT1_CF | blue   | na |
| chrUn | 51184540 | 51187042 | 2503 SAT1_CF | blue   | na |
| chrUn | 51187095 | 51187385 | 291 SAT1_CF  | blue   | na |
| chrUn | 51194162 | 51195421 | 1260 SAT1_CF | blue   | na |
| chrUn | 51196938 | 51197259 | 322 SAT1_CF  | blue   | na |
| chrUn | 51197351 | 51197859 | 509 SAT1_CF  | blue   | na |
| chrUn | 51199049 | 51200790 | 1742 CarSat1 | red    | na |
| chrUn | 51200805 | 51200931 | 127 Carsat2  | orange | na |
| chrUn | 51200820 | 51210662 | 9843 CarSat1 | red    | na |
| chrUn | 51210683 | 51212323 | 1641 CarSat1 | red    | na |
| chrUn | 51236947 | 51237637 | 691 CarSat1  | red    | na |
| chrUn | 51237661 | 51238868 | 1208 CarSat1 | red    | na |



|       |          |          |      |         |      |    |
|-------|----------|----------|------|---------|------|----|
| chrUn | 51238879 | 51241548 | 2670 | CarSat1 | red  | na |
| chrUn | 51241578 | 51244026 | 2449 | CarSat1 | red  | na |
| chrUn | 51244037 | 51245503 | 1467 | CarSat1 | red  | na |
| chrUn | 51245524 | 51246978 | 1455 | CarSat1 | red  | na |
| chrUn | 51246999 | 51248453 | 1455 | CarSat1 | red  | na |
| chrUn | 51248464 | 51249198 | 735  | CarSat1 | red  | na |
| chrUn | 51249214 | 51253043 | 3830 | CarSat1 | red  | na |
| chrUn | 51254045 | 51255655 | 1611 | SAT1_CF | blue | na |
| chrUn | 51255668 | 51257090 | 1423 | SAT1_CF | blue | na |
| chrUn | 51263360 | 51265993 | 2634 | SAT1_CF | blue | na |
| chrUn | 51266036 | 51267251 | 1216 | SAT1_CF | blue | na |
| chrUn | 51267272 | 51269058 | 1787 | SAT1_CF | blue | na |
| chrUn | 51269071 | 51270320 | 1250 | SAT1_CF | blue | na |
| chrUn | 51270325 | 51271506 | 1182 | CarSat1 | red  | na |
| chrUn | 51271525 | 51273033 | 1509 | CarSat1 | red  | na |
| chrUn | 51273059 | 51274014 | 956  | CarSat1 | red  | na |
| chrUn | 51284783 | 51285702 | 920  | CarSat1 | red  | na |
| chrUn | 51285723 | 51286700 | 978  | CarSat1 | red  | na |
| chrUn | 51286730 | 51287300 | 571  | CarSat1 | red  | na |
| chrUn | 51287900 | 51288546 | 647  | CarSat1 | red  | na |
| chrUn | 51288571 | 51290571 | 2001 | CarSat1 | red  | na |
| chrUn | 51290598 | 51291444 | 847  | CarSat1 | red  | na |
| chrUn | 51291877 | 51292947 | 1071 | CarSat1 | red  | na |
| chrUn | 51293383 | 51293970 | 588  | CarSat1 | red  | na |
| chrUn | 51293997 | 51294933 | 937  | CarSat1 | red  | na |
| chrUn | 51297046 | 51298915 | 1870 | CarSat1 | red  | na |
| chrUn | 51298940 | 51299683 | 744  | CarSat1 | red  | na |
| chrUn | 51299710 | 51300421 | 712  | CarSat1 | red  | na |
| chrUn | 51300448 | 51302537 | 2090 | CarSat1 | red  | na |
| chrUn | 51302556 | 51303695 | 1140 | CarSat1 | red  | na |
| chrUn | 51303879 | 51304731 | 853  | CarSat1 | red  | na |
| chrUn | 51304747 | 51306205 | 1459 | CarSat1 | red  | na |
| chrUn | 51306221 | 51307182 | 962  | CarSat1 | red  | na |
| chrUn | 51307209 | 51307919 | 711  | CarSat1 | red  | na |
| chrUn | 51307946 | 51308790 | 845  | CarSat1 | red  | na |
| chrUn | 51310862 | 51313339 | 2478 | CarSat1 | red  | na |
| chrUn | 51313355 | 51314812 | 1458 | CarSat1 | red  | na |
| chrUn | 51314828 | 51315396 | 569  | CarSat1 | red  | na |
| chrUn | 51316078 | 51317175 | 1098 | CarSat1 | red  | na |
| chrUn | 51317780 | 51319010 | 1231 | CarSat1 | red  | na |
| chrUn | 51319053 | 51319608 | 556  | CarSat1 | red  | na |
| chrUn | 51320255 | 51321241 | 987  | CarSat1 | red  | na |

|       |          |          |      |          |        |    |
|-------|----------|----------|------|----------|--------|----|
| chrUn | 51322268 | 51322935 | 668  | CarSat1  | red    | na |
| chrUn | 51322962 | 51323671 | 710  | CarSat1  | red    | na |
| chrUn | 51323698 | 51324674 | 977  | CarSat1  | red    | na |
| chrUn | 51324704 | 51327114 | 2411 | CarSat1  | red    | na |
| chrUn | 51327130 | 51328092 | 963  | CarSat1  | red    | na |
| chrUn | 51328119 | 51330304 | 2186 | CarSat1  | red    | na |
| chrUn | 51330331 | 51333521 | 3191 | CarSat1  | red    | na |
| chrUn | 51333558 | 51334491 | 934  | CarSat1  | red    | na |
| chrUn | 51334515 | 51335737 | 1223 | CarSat1  | red    | na |
| chrUn | 51335774 | 51337677 | 1904 | CarSat1  | red    | na |
| chrUn | 51339488 | 51340627 | 1140 | CarSat1  | red    | na |
| chrUn | 51340654 | 51341828 | 1175 | CarSat1  | red    | na |
| chrUn | 51341828 | 51342145 | 318  | SAT1_CF  | blue   | na |
| chrUn | 51342172 | 51342368 | 197  | SAT1_CF  | blue   | na |
| chrUn | 51343332 | 51344296 | 965  | CarSat1  | red    | na |
| chrUn | 51344324 | 51345531 | 1208 | CarSat1  | red    | na |
| chrUn | 51345556 | 51350691 | 5136 | CarSat1  | red    | na |
| chrUn | 51350707 | 51351941 | 1235 | CarSat1  | red    | na |
| chrUn | 51351971 | 51352649 | 679  | CarSat1  | red    | na |
| chrUn | 51352688 | 51353157 | 470  | CarSat1  | red    | na |
| chrUn | 51353173 | 51354232 | 1060 | CarSat1  | red    | na |
| chrUn | 51359624 | 51359670 | 47   | Sat111CF | na     | na |
| chrUn | 51359960 | 51360200 | 241  | Sat5CF   | stalk  | na |
| chrUn | 51359987 | 51360200 | 214  | Sat111CF | na     | na |
| chrUn | 51441067 | 51441771 | 705  | CarSat1  | red    | na |
| chrUn | 51441801 | 51443383 | 1583 | CarSat1  | red    | na |
| chrUn | 51443404 | 51444195 | 792  | CarSat1  | red    | na |
| chrUn | 51444277 | 51445133 | 857  | CarSat1  | red    | na |
| chrUn | 51445154 | 51446370 | 1217 | CarSat1  | red    | na |
| chrUn | 51446442 | 51447456 | 1015 | SAT1_CF  | blue   | na |
| chrUn | 51447451 | 51448175 | 725  | CarSat1  | red    | na |
| chrUn | 51448207 | 51448633 | 427  | CarSat1  | red    | na |
| chrUn | 51450519 | 51450681 | 163  | Sat2CF   | purple | na |
| chrUn | 51450547 | 51450906 | 360  | Sat2CF   | purple | na |
| chrUn | 51450586 | 51451370 | 785  | Sat2CF   | purple | na |
| chrUn | 51466803 | 51467928 | 1126 | Sat2CF   | purple | na |
| chrUn | 51467478 | 51468009 | 532  | Sat2CF   | purple | na |
| chrUn | 51503906 | 51504163 | 258  | Sat11CF  | na     | na |
| chrUn | 51504215 | 51504360 | 146  | Sat11CF  | na     | na |
| chrUn | 51504411 | 51504791 | 381  | Sat11CF  | na     | na |
| chrUn | 51514138 | 51515058 | 921  | Sat2CF   | purple | na |
| chrUn | 51514951 | 51515129 | 179  | Sat2CF   | purple | na |

|       |          |          |              |        |    |
|-------|----------|----------|--------------|--------|----|
| chrUn | 51529948 | 51530112 | 165 Sat2CF   | purple | na |
| chrUn | 51529968 | 51530806 | 839 Sat2CF   | purple | na |
| chrUn | 51530019 | 51530745 | 727 Sat2CF   | purple | na |
| chrUn | 51590345 | 51591056 | 712 CarSat1  | red    | na |
| chrUn | 51591251 | 51592868 | 1618 CarSat1 | red    | na |
| chrUn | 51592901 | 51593601 | 701 CarSat1  | red    | na |
| chrUn | 51593615 | 51595552 | 1938 CarSat1 | red    | na |
| chrUn | 51595573 | 51596190 | 618 CarSat1  | red    | na |
| chrUn | 51596633 | 51599759 | 3127 CarSat1 | red    | na |
| chrUn | 51602272 | 51603023 | 752 CarSat1  | red    | na |
| chrUn | 51603044 | 51603757 | 714 CarSat1  | red    | na |
| chrUn | 51603778 | 51604489 | 712 CarSat1  | red    | na |
| chrUn | 51604516 | 51605226 | 711 CarSat1  | red    | na |
| chrUn | 51605253 | 51605963 | 711 CarSat1  | red    | na |
| chrUn | 51605990 | 51606701 | 712 CarSat1  | red    | na |
| chrUn | 51606723 | 51607441 | 719 CarSat1  | red    | na |
| chrUn | 51607468 | 51607908 | 441 CarSat1  | red    | na |
| chrUn | 51608389 | 51610135 | 1747 CarSat1 | red    | na |
| chrUn | 51611390 | 51613380 | 1991 CarSat1 | red    | na |
| chrUn | 51613407 | 51614348 | 942 CarSat1  | red    | na |
| chrUn | 51615439 | 51617910 | 2472 CarSat1 | red    | na |
| chrUn | 51619089 | 51620564 | 1476 CarSat1 | red    | na |
| chrUn | 51621676 | 51622814 | 1139 SAT1_CF | blue   | na |
| chrUn | 51622825 | 51623428 | 604 SAT1_CF  | blue   | na |
| chrUn | 51623450 | 51624640 | 1191 SAT1_CF | blue   | na |
| chrUn | 51624654 | 51626938 | 2285 SAT1_CF | blue   | na |
| chrUn | 51626949 | 51628450 | 1502 SAT1_CF | blue   | na |
| chrUn | 51638294 | 51638872 | 579 SAT1_CF  | blue   | na |
| chrUn | 51638888 | 51639055 | 168 SAT1_CF  | blue   | na |
| chrUn | 51639107 | 51639593 | 487 SAT1_CF  | blue   | na |
| chrUn | 51639608 | 51639802 | 195 SAT1_CF  | blue   | na |
| chrUn | 51639819 | 51642657 | 2839 SAT1_CF | blue   | na |
| chrUn | 51642700 | 51643905 | 1206 SAT1_CF | blue   | na |
| chrUn | 51643948 | 51645092 | 1145 SAT1_CF | blue   | na |
| chrUn | 51645108 | 51647118 | 2011 SAT1_CF | blue   | na |
| chrUn | 51647200 | 51647943 | 744 SAT1_CF  | blue   | na |
| chrUn | 51651379 | 51652017 | 639 CarSat1  | red    | na |
| chrUn | 51652032 | 51652159 | 128 Carsat2  | orange | na |
| chrUn | 51652047 | 51652752 | 706 CarSat1  | red    | na |
| chrUn | 51652782 | 51653487 | 706 CarSat1  | red    | na |
| chrUn | 51653502 | 51653625 | 124 Carsat2  | orange | na |
| chrUn | 51653517 | 51654224 | 708 CarSat1  | red    | na |

|       |          |          |      |         |        |    |
|-------|----------|----------|------|---------|--------|----|
| chrUn | 51654239 | 51654364 | 126  | Carsat2 | orange | na |
| chrUn | 51654254 | 51654959 | 706  | CarSat1 | red    | na |
| chrUn | 51654989 | 51655696 | 708  | CarSat1 | red    | na |
| chrUn | 51655711 | 51655837 | 127  | Carsat2 | orange | na |
| chrUn | 51655726 | 51657908 | 2183 | CarSat1 | red    | na |
| chrUn | 51657923 | 51658049 | 127  | Carsat2 | orange | na |
| chrUn | 51657938 | 51658644 | 707  | CarSat1 | red    | na |
| chrUn | 51658674 | 51659380 | 707  | CarSat1 | red    | na |
| chrUn | 51659395 | 51659522 | 128  | Carsat2 | orange | na |
| chrUn | 51659410 | 51660119 | 710  | CarSat1 | red    | na |
| chrUn | 51660134 | 51660260 | 127  | Carsat2 | orange | na |
| chrUn | 51660149 | 51661376 | 1228 | CarSat1 | red    | na |
| chrUn | 51661409 | 51662855 | 1447 | CarSat1 | red    | na |
| chrUn | 51662888 | 51664827 | 1940 | CarSat1 | red    | na |
| chrUn | 51664848 | 51667025 | 2178 | CarSat1 | red    | na |
| chrUn | 51667046 | 51669233 | 2188 | CarSat1 | red    | na |
| chrUn | 51669254 | 51670224 | 971  | CarSat1 | red    | na |
| chrUn | 51670249 | 51671910 | 1662 | CarSat1 | red    | na |
| chrUn | 51671924 | 51672050 | 127  | Carsat2 | orange | na |
| chrUn | 51671939 | 51674869 | 2931 | CarSat1 | red    | na |
| chrUn | 51674884 | 51675011 | 128  | Carsat2 | orange | na |
| chrUn | 51674899 | 51675606 | 708  | CarSat1 | red    | na |
| chrUn | 51675621 | 51675748 | 128  | Carsat2 | orange | na |
| chrUn | 51675636 | 51676346 | 711  | CarSat1 | red    | na |
| chrUn | 51676361 | 51676488 | 128  | Carsat2 | orange | na |
| chrUn | 51676376 | 51677821 | 1446 | CarSat1 | red    | na |
| chrUn | 51677836 | 51677963 | 128  | Carsat2 | orange | na |
| chrUn | 51677851 | 51678557 | 707  | CarSat1 | red    | na |
| chrUn | 51678587 | 51680240 | 1654 | CarSat1 | red    | na |
| chrUn | 51728528 | 51729162 | 635  | SAT1_CF | blue   | na |
| chrUn | 51729206 | 51730670 | 1465 | SAT1_CF | blue   | na |
| chrUn | 51730682 | 51731256 | 575  | SAT1_CF | blue   | na |
| chrUn | 51731278 | 51731374 | 97   | SAT1_CF | blue   | na |
| chrUn | 51731398 | 51732229 | 832  | SAT1_CF | blue   | na |
| chrUn | 51732243 | 51733115 | 873  | SAT1_CF | blue   | na |
| chrUn | 51733145 | 51733688 | 544  | SAT1_CF | blue   | na |
| chrUn | 51733730 | 51735155 | 1426 | SAT1_CF | blue   | na |
| chrUn | 51735177 | 51735284 | 108  | SAT1_CF | blue   | na |
| chrUn | 51735297 | 51735796 | 500  | SAT1_CF | blue   | na |
| chrUn | 51735864 | 51736001 | 138  | SAT1_CF | blue   | na |
| chrUn | 51736034 | 51736540 | 507  | SAT1_CF | blue   | na |
| chrUn | 51736571 | 51738031 | 1461 | SAT1_CF | blue   | na |

|       |          |          |              |      |    |
|-------|----------|----------|--------------|------|----|
| chrUn | 51738043 | 51738665 | 623 SAT1_CF  | blue | na |
| chrUn | 51738678 | 51739678 | 1001 SAT1_CF | blue | na |
| chrUn | 51739721 | 51740395 | 675 SAT1_CF  | blue | na |
| chrUn | 51740408 | 51740890 | 483 SAT1_CF  | blue | na |
| chrUn | 51740950 | 51741405 | 456 SAT1_CF  | blue | na |
| chrUn | 51741416 | 51742279 | 864 SAT1_CF  | blue | na |
| chrUn | 51742317 | 51742861 | 545 SAT1_CF  | blue | na |
| chrUn | 51742902 | 51743764 | 863 SAT1_CF  | blue | na |
| chrUn | 51743776 | 51744444 | 669 SAT1_CF  | blue | na |
| chrUn | 51744456 | 51745088 | 633 SAT1_CF  | blue | na |
| chrUn | 51745159 | 51745702 | 544 SAT1_CF  | blue | na |
| chrUn | 51745745 | 51746291 | 547 SAT1_CF  | blue | na |
| chrUn | 51746335 | 51747332 | 998 SAT1_CF  | blue | na |
| chrUn | 51747375 | 51748054 | 680 SAT1_CF  | blue | na |
| chrUn | 51748066 | 51748873 | 808 SAT1_CF  | blue | na |
| chrUn | 51748900 | 51749420 | 521 SAT1_CF  | blue | na |
| chrUn | 51749441 | 51751523 | 2083 SAT1_CF | blue | na |
| chrUn | 51751540 | 51751652 | 113 SAT1_CF  | blue | na |
| chrUn | 51751665 | 51752347 | 683 SAT1_CF  | blue | na |
| chrUn | 51752367 | 51752860 | 494 SAT1_CF  | blue | na |
| chrUn | 51752902 | 51753304 | 403 SAT1_CF  | blue | na |
| chrUn | 51753315 | 51753822 | 508 SAT1_CF  | blue | na |
| chrUn | 51753869 | 51754942 | 1074 SAT1_CF | blue | na |
| chrUn | 51754991 | 51755536 | 546 SAT1_CF  | blue | na |
| chrUn | 51755549 | 51755665 | 117 SAT1_CF  | blue | na |
| chrUn | 51755677 | 51756348 | 672 SAT1_CF  | blue | na |
| chrUn | 51756371 | 51756871 | 501 SAT1_CF  | blue | na |
| chrUn | 51756918 | 51757297 | 380 SAT1_CF  | blue | na |
| chrUn | 51758302 | 51758827 | 526 SAT1_CF  | blue | na |
| chrUn | 51758856 | 51760356 | 1501 SAT1_CF | blue | na |
| chrUn | 51760399 | 51761714 | 1316 SAT1_CF | blue | na |
| chrUn | 51761727 | 51762404 | 678 SAT1_CF  | blue | na |
| chrUn | 51762446 | 51763939 | 1494 SAT1_CF | blue | na |
| chrUn | 51764423 | 51765480 | 1058 SAT1_CF | blue | na |
| chrUn | 51765508 | 51765643 | 136 SAT1_CF  | blue | na |
| chrUn | 51765710 | 51766208 | 499 SAT1_CF  | blue | na |
| chrUn | 51766251 | 51766434 | 184 SAT1_CF  | blue | na |
| chrUn | 51766473 | 51767565 | 1093 SAT1_CF | blue | na |
| chrUn | 51767609 | 51768237 | 629 SAT1_CF  | blue | na |
| chrUn | 51768275 | 51768773 | 499 SAT1_CF  | blue | na |
| chrUn | 51768915 | 51769458 | 544 SAT1_CF  | blue | na |
| chrUn | 51769529 | 51770002 | 474 SAT1_CF  | blue | na |

|       |          |          |              |      |    |
|-------|----------|----------|--------------|------|----|
| chrUn | 51770016 | 51770131 | 116 SAT1_CF  | blue | na |
| chrUn | 51770144 | 51770415 | 272 SAT1_CF  | blue | na |
| chrUn | 51771426 | 51773144 | 1719 SAT1_CF | blue | na |
| chrUn | 51773187 | 51773611 | 425 SAT1_CF  | blue | na |
| chrUn | 51773624 | 51774252 | 629 SAT1_CF  | blue | na |
| chrUn | 51774268 | 51774809 | 542 SAT1_CF  | blue | na |
| chrUn | 51774822 | 51776019 | 1198 SAT1_CF | blue | na |
| chrUn | 51776032 | 51776882 | 851 SAT1_CF  | blue | na |
| chrUn | 51776924 | 51777621 | 698 SAT1_CF  | blue | na |
| chrUn | 51777635 | 51778179 | 545 SAT1_CF  | blue | na |
| chrUn | 51778216 | 51778728 | 513 SAT1_CF  | blue | na |
| chrUn | 51778834 | 51779463 | 630 SAT1_CF  | blue | na |
| chrUn | 51779475 | 51780315 | 841 SAT1_CF  | blue | na |
| chrUn | 51780327 | 51781866 | 1540 SAT1_CF | blue | na |
| chrUn | 51781892 | 51782596 | 705 SAT1_CF  | blue | na |
| chrUn | 51782609 | 51783725 | 1117 SAT1_CF | blue | na |
| chrUn | 51783788 | 51784344 | 557 SAT1_CF  | blue | na |
| chrUn | 51784356 | 51785030 | 675 SAT1_CF  | blue | na |
| chrUn | 51785073 | 51786038 | 966 SAT1_CF  | blue | na |
| chrUn | 51786093 | 51787119 | 1027 SAT1_CF | blue | na |
| chrUn | 51787155 | 51787649 | 495 SAT1_CF  | blue | na |
| chrUn | 51787669 | 51788404 | 736 SAT1_CF  | blue | na |
| chrUn | 51789432 | 51790578 | 1147 SAT1_CF | blue | na |
| chrUn | 51790601 | 51790706 | 106 SAT1_CF  | blue | na |
| chrUn | 51790719 | 51791465 | 747 SAT1_CF  | blue | na |
| chrUn | 51791492 | 51791993 | 502 SAT1_CF  | blue | na |
| chrUn | 51792039 | 51792967 | 929 SAT1_CF  | blue | na |
| chrUn | 51792984 | 51793266 | 283 SAT1_CF  | blue | na |
| chrUn | 51793308 | 51793852 | 545 SAT1_CF  | blue | na |
| chrUn | 51793894 | 51794441 | 548 SAT1_CF  | blue | na |
| chrUn | 51794498 | 51795452 | 955 SAT1_CF  | blue | na |
| chrUn | 51795497 | 51796021 | 525 SAT1_CF  | blue | na |
| chrUn | 51796042 | 51796320 | 279 SAT1_CF  | blue | na |
| chrUn | 51796362 | 51797842 | 1481 SAT1_CF | blue | na |
| chrUn | 51797854 | 51798544 | 691 SAT1_CF  | blue | na |
| chrUn | 51798558 | 51799459 | 902 SAT1_CF  | blue | na |
| chrUn | 51799511 | 51800139 | 629 SAT1_CF  | blue | na |
| chrUn | 51800163 | 51800269 | 107 SAT1_CF  | blue | na |
| chrUn | 51800281 | 51800783 | 503 SAT1_CF  | blue | na |
| chrUn | 51800849 | 51800984 | 136 SAT1_CF  | blue | na |
| chrUn | 51801012 | 51801977 | 966 SAT1_CF  | blue | na |
| chrUn | 51802029 | 51802201 | 173 SAT1_CF  | blue | na |

|       |          |          |              |        |    |
|-------|----------|----------|--------------|--------|----|
| chrUn | 51802245 | 51803579 | 1335 SAT1_CF | blue   | na |
| chrUn | 51803591 | 51804261 | 671 SAT1_CF  | blue   | na |
| chrUn | 51804286 | 51804788 | 503 SAT1_CF  | blue   | na |
| chrUn | 51804854 | 51804990 | 137 SAT1_CF  | blue   | na |
| chrUn | 51805005 | 51805527 | 523 SAT1_CF  | blue   | na |
| chrUn | 51805607 | 51806848 | 1242 SAT1_CF | blue   | na |
| chrUn | 51806879 | 51807398 | 520 SAT1_CF  | blue   | na |
| chrUn | 51807515 | 51807868 | 354 SAT1_CF  | blue   | na |
| chrUn | 51807880 | 51808849 | 970 SAT1_CF  | blue   | na |
| chrUn | 51808892 | 51809434 | 543 SAT1_CF  | blue   | na |
| chrUn | 51809530 | 51810203 | 674 SAT1_CF  | blue   | na |
| chrUn | 51810216 | 51810718 | 503 SAT1_CF  | blue   | na |
| chrUn | 51810805 | 51811159 | 355 SAT1_CF  | blue   | na |
| chrUn | 51811172 | 51811715 | 544 SAT1_CF  | blue   | na |
| chrUn | 51811740 | 51812060 | 321 SAT1_CF  | blue   | na |
| chrUn | 51812071 | 51812613 | 543 SAT1_CF  | blue   | na |
| chrUn | 51812655 | 51813513 | 859 SAT1_CF  | blue   | na |
| chrUn | 51813525 | 51814171 | 647 SAT1_CF  | blue   | na |
| chrUn | 51814184 | 51814946 | 763 SAT1_CF  | blue   | na |
| chrUn | 51814958 | 51815531 | 574 SAT1_CF  | blue   | na |
| chrUn | 51815554 | 51815660 | 107 SAT1_CF  | blue   | na |
| chrUn | 51815673 | 51816218 | 546 SAT1_CF  | blue   | na |
| chrUn | 51816295 | 51817351 | 1057 SAT1_CF | blue   | na |
| chrUn | 51817464 | 51818028 | 565 SAT1_CF  | blue   | na |
| chrUn | 51852512 | 51853698 | 1187 CarSat1 | red    | na |
| chrUn | 51879695 | 51880870 | 1176 Sat2CF  | purple | na |
| chrUn | 51881257 | 51882343 | 1087 Sat2CF  | purple | na |
| chrUn | 51884040 | 51887407 | 3368 CarSat1 | red    | na |
| chrUn | 51887440 | 51888143 | 704 CarSat1  | red    | na |
| chrUn | 51888176 | 51888881 | 706 CarSat1  | red    | na |
| chrUn | 51888914 | 51889414 | 501 CarSat1  | red    | na |
| chrUn | 51889429 | 51890359 | 931 CarSat1  | red    | na |
| chrUn | 51890395 | 51892570 | 2176 CarSat1 | red    | na |
| chrUn | 51892603 | 51893088 | 486 CarSat1  | red    | na |
| chrUn | 51893122 | 51894575 | 1454 CarSat1 | red    | na |
| chrUn | 51894590 | 51896992 | 2403 CarSat1 | red    | na |
| chrUn | 51897025 | 51899737 | 2713 CarSat1 | red    | na |
| chrUn | 51899752 | 51900473 | 722 CarSat1  | red    | na |
| chrUn | 51900488 | 51901424 | 937 CarSat1  | red    | na |
| chrUn | 51901446 | 51903004 | 1559 CarSat1 | red    | na |
| chrUn | 51903037 | 51903523 | 487 CarSat1  | red    | na |
| chrUn | 51903553 | 51904275 | 723 CarSat1  | red    | na |

|       |          |          |      |         |        |    |
|-------|----------|----------|------|---------|--------|----|
| chrUn | 51904290 | 51905754 | 1465 | CarSat1 | red    | na |
| chrUn | 51905769 | 51906722 | 954  | CarSat1 | red    | na |
| chrUn | 51907305 | 51907975 | 671  | CarSat1 | red    | na |
| chrUn | 51907990 | 51908916 | 927  | CarSat1 | red    | na |
| chrUn | 51908949 | 51910648 | 1700 | CarSat1 | red    | na |
| chrUn | 51910669 | 51911137 | 469  | CarSat1 | red    | na |
| chrUn | 51911162 | 51911864 | 703  | CarSat1 | red    | na |
| chrUn | 51911897 | 51913277 | 1381 | CarSat1 | red    | na |
| chrUn | 51942409 | 51943184 | 776  | Sat10CF | na     | na |
| chrUn | 51962549 | 51963491 | 943  | CarSat1 | red    | na |
| chrUn | 51963516 | 51963985 | 470  | CarSat1 | red    | na |
| chrUn | 51964006 | 51964451 | 446  | CarSat1 | red    | na |
| chrUn | 51964477 | 51965699 | 1223 | CarSat1 | red    | na |
| chrUn | 51965732 | 51967661 | 1930 | CarSat1 | red    | na |
| chrUn | 51967686 | 51968131 | 446  | CarSat1 | red    | na |
| chrUn | 51968146 | 51968273 | 128  | Carsat2 | orange | na |
| chrUn | 51968161 | 51968868 | 708  | CarSat1 | red    | na |
| chrUn | 51968883 | 51969009 | 127  | Carsat2 | orange | na |
| chrUn | 51968898 | 51970353 | 1456 | CarSat1 | red    | na |
| chrUn | 51970368 | 51970491 | 124  | Carsat2 | orange | na |
| chrUn | 51970383 | 51971611 | 1229 | CarSat1 | red    | na |
| chrUn | 51971644 | 51972570 | 927  | CarSat1 | red    | na |
| chrUn | 51972585 | 51972711 | 127  | Carsat2 | orange | na |
| chrUn | 51972600 | 51977992 | 5393 | CarSat1 | red    | na |
| chrUn | 51978015 | 51980205 | 2191 | CarSat1 | red    | na |
| chrUn | 51980216 | 51985835 | 5620 | CarSat1 | red    | na |
| chrUn | 51985865 | 51986571 | 707  | CarSat1 | red    | na |
| chrUn | 51986601 | 51987308 | 708  | CarSat1 | red    | na |
| chrUn | 51987338 | 51987823 | 486  | CarSat1 | red    | na |
| chrUn | 51987847 | 51990262 | 2416 | CarSat1 | red    | na |
| chrUn | 51990277 | 51990403 | 127  | Carsat2 | orange | na |
| chrUn | 51990292 | 51990979 | 688  | CarSat1 | red    | na |
| chrUn | 52044367 | 52045262 | 896  | CarSat1 | red    | na |
| chrUn | 52045278 | 52046000 | 723  | CarSat1 | red    | na |
| chrUn | 52046016 | 52046737 | 722  | CarSat1 | red    | na |
| chrUn | 52046753 | 52054573 | 7821 | CarSat1 | red    | na |
| chrUn | 52064580 | 52066164 | 1585 | CarSat1 | red    | na |
| chrUn | 52066189 | 52069533 | 3345 | CarSat1 | red    | na |
| chrUn | 52069560 | 52072733 | 3174 | CarSat1 | red    | na |
| chrUn | 52072760 | 52074205 | 1446 | CarSat1 | red    | na |
| chrUn | 52074230 | 52077575 | 3346 | CarSat1 | red    | na |
| chrUn | 52077602 | 52079791 | 2190 | CarSat1 | red    | na |



|       |          |          |              |        |    |
|-------|----------|----------|--------------|--------|----|
| chrUn | 52079818 | 52082763 | 2946 CarSat1 | red    | na |
| chrUn | 52087024 | 52087822 | 799 Sat2CF   | purple | na |
| chrUn | 52087714 | 52087838 | 125 Sat2CF   | purple | na |
| chrUn | 52132343 | 52133519 | 1177 Sat2CF  | purple | na |
| chrUn | 52179515 | 52180137 | 623 SAT1_CF  | blue   | na |
| chrUn | 52180171 | 52180837 | 667 SAT1_CF  | blue   | na |
| chrUn | 52180882 | 52182140 | 1259 SAT1_CF | blue   | na |
| chrUn | 52182220 | 52182537 | 318 SAT1_CF  | blue   | na |
| chrUn | 52182592 | 52183094 | 503 SAT1_CF  | blue   | na |
| chrUn | 52183107 | 52183182 | 76 SAT1_CF   | blue   | na |
| chrUn | 52183201 | 52184410 | 1210 SAT1_CF | blue   | na |
| chrUn | 52184453 | 52185050 | 598 SAT1_CF  | blue   | na |
| chrUn | 52185066 | 52186815 | 1750 SAT1_CF | blue   | na |
| chrUn | 52186902 | 52187404 | 503 SAT1_CF  | blue   | na |
| chrUn | 52187416 | 52187521 | 106 SAT1_CF  | blue   | na |
| chrUn | 52187545 | 52188347 | 803 SAT1_CF  | blue   | na |
| chrUn | 52188360 | 52188468 | 109 SAT1_CF  | blue   | na |
| chrUn | 52188489 | 52189238 | 750 SAT1_CF  | blue   | na |
| chrUn | 52189260 | 52189911 | 652 SAT1_CF  | blue   | na |
| chrUn | 52189923 | 52190465 | 543 SAT1_CF  | blue   | na |
| chrUn | 52190509 | 52191515 | 1007 SAT1_CF | blue   | na |
| chrUn | 52191608 | 52192518 | 911 SAT1_CF  | blue   | na |
| chrUn | 52192635 | 52193176 | 542 SAT1_CF  | blue   | na |
| chrUn | 52193188 | 52193301 | 114 SAT1_CF  | blue   | na |
| chrUn | 52193317 | 52193864 | 548 SAT1_CF  | blue   | na |
| chrUn | 52193907 | 52195535 | 1629 SAT1_CF | blue   | na |
| chrUn | 52195546 | 52195947 | 402 SAT1_CF  | blue   | na |
| chrUn | 52195968 | 52196488 | 521 SAT1_CF  | blue   | na |
| chrUn | 52196501 | 52197175 | 675 SAT1_CF  | blue   | na |
| chrUn | 52197195 | 52197860 | 666 SAT1_CF  | blue   | na |
| chrUn | 52197903 | 52198534 | 632 SAT1_CF  | blue   | na |
| chrUn | 52198599 | 52199159 | 561 SAT1_CF  | blue   | na |
| chrUn | 52199265 | 52199747 | 483 SAT1_CF  | blue   | na |
| chrUn | 52199760 | 52199840 | 81 SAT1_CF   | blue   | na |
| chrUn | 52199854 | 52200368 | 515 SAT1_CF  | blue   | na |
| chrUn | 52200380 | 52201265 | 886 SAT1_CF  | blue   | na |
| chrUn | 52201287 | 52202137 | 851 SAT1_CF  | blue   | na |
| chrUn | 52202150 | 52204047 | 1898 SAT1_CF | blue   | na |
| chrUn | 52204062 | 52205005 | 944 SAT1_CF  | blue   | na |
| chrUn | 52205018 | 52205865 | 848 SAT1_CF  | blue   | na |
| chrUn | 52205907 | 52206992 | 1086 SAT1_CF | blue   | na |
| chrUn | 52207014 | 52207113 | 100 SAT1_CF  | blue   | na |

|       |          |          |              |      |    |
|-------|----------|----------|--------------|------|----|
| chrUn | 52207134 | 52207596 | 463 SAT1_CF  | blue | na |
| chrUn | 52247740 | 52248403 | 664 SAT1_CF  | blue | na |
| chrUn | 52248415 | 52248922 | 508 SAT1_CF  | blue | na |
| chrUn | 52251761 | 52252874 | 1114 SAT1_CF | blue | na |
| chrUn | 52253597 | 52254098 | 502 SAT1_CF  | blue | na |
| chrUn | 52254111 | 52254784 | 674 SAT1_CF  | blue | na |
| chrUn | 52254828 | 52255338 | 511 SAT1_CF  | blue | na |
| chrUn | 52255408 | 52256037 | 630 SAT1_CF  | blue | na |
| chrUn | 52256060 | 52256913 | 854 SAT1_CF  | blue | na |
| chrUn | 52256992 | 52257958 | 967 SAT1_CF  | blue | na |
| chrUn | 52258675 | 52259086 | 412 SAT1_CF  | blue | na |
| chrUn | 52259129 | 52259682 | 554 SAT1_CF  | blue | na |
| chrUn | 52259694 | 52260010 | 317 SAT1_CF  | blue | na |
| chrUn | 52262352 | 52264422 | 2071 SAT1_CF | blue | na |
| chrUn | 52264435 | 52265116 | 682 SAT1_CF  | blue | na |
| chrUn | 52265128 | 52265811 | 684 SAT1_CF  | blue | na |
| chrUn | 52265822 | 52266314 | 493 SAT1_CF  | blue | na |
| chrUn | 52266328 | 52267102 | 775 SAT1_CF  | blue | na |
| chrUn | 52268002 | 52268859 | 858 SAT1_CF  | blue | na |
| chrUn | 52268903 | 52269428 | 526 SAT1_CF  | blue | na |
| chrUn | 52270031 | 52270631 | 601 SAT1_CF  | blue | na |
| chrUn | 52270644 | 52271146 | 503 SAT1_CF  | blue | na |
| chrUn | 52271159 | 52271757 | 599 SAT1_CF  | blue | na |
| chrUn | 52271769 | 52272999 | 1231 SAT1_CF | blue | na |
| chrUn | 52273042 | 52273553 | 512 SAT1_CF  | blue | na |
| chrUn | 52273581 | 52273737 | 157 SAT1_CF  | blue | na |
| chrUn | 52273763 | 52274395 | 633 SAT1_CF  | blue | na |
| chrUn | 52325497 | 52327023 | 1527 SAT1_CF | blue | na |
| chrUn | 52327068 | 52327746 | 679 SAT1_CF  | blue | na |
| chrUn | 52327758 | 52328959 | 1202 SAT1_CF | blue | na |
| chrUn | 52328997 | 52329716 | 720 SAT1_CF  | blue | na |
| chrUn | 52329758 | 52330300 | 543 SAT1_CF  | blue | na |
| chrUn | 52330342 | 52330889 | 548 SAT1_CF  | blue | na |
| chrUn | 52330921 | 52331465 | 545 SAT1_CF  | blue | na |
| chrUn | 52331581 | 52331933 | 353 SAT1_CF  | blue | na |
| chrUn | 52331946 | 52333303 | 1358 SAT1_CF | blue | na |
| chrUn | 52333315 | 52334518 | 1204 SAT1_CF | blue | na |
| chrUn | 52334563 | 52335788 | 1226 SAT1_CF | blue | na |
| chrUn | 52335800 | 52336743 | 944 SAT1_CF  | blue | na |
| chrUn | 52336800 | 52337320 | 521 SAT1_CF  | blue | na |
| chrUn | 52337388 | 52339428 | 2041 SAT1_CF | blue | na |
| chrUn | 52339470 | 52340142 | 673 SAT1_CF  | blue | na |

|       |          |          |              |       |    |
|-------|----------|----------|--------------|-------|----|
| chrUn | 52340155 | 52340655 | 501 SAT1_CF  | blue  | na |
| chrUn | 52340721 | 52340856 | 136 SAT1_CF  | blue  | na |
| chrUn | 52340871 | 52341395 | 525 SAT1_CF  | blue  | na |
| chrUn | 52341476 | 52342262 | 787 SAT1_CF  | blue  | na |
| chrUn | 52342285 | 52342390 | 106 SAT1_CF  | blue  | na |
| chrUn | 52342403 | 52342922 | 520 SAT1_CF  | blue  | na |
| chrUn | 52342941 | 52343124 | 184 SAT1_CF  | blue  | na |
| chrUn | 52343306 | 52345100 | 1795 SAT1_CF | blue  | na |
| chrUn | 52345112 | 52345670 | 559 SAT1_CF  | blue  | na |
| chrUn | 52345735 | 52346253 | 519 SAT1_CF  | blue  | na |
| chrUn | 52346324 | 52347104 | 781 SAT1_CF  | blue  | na |
| chrUn | 52347146 | 52348007 | 862 SAT1_CF  | blue  | na |
| chrUn | 52348019 | 52349255 | 1237 SAT1_CF | blue  | na |
| chrUn | 52349298 | 52349844 | 547 SAT1_CF  | blue  | na |
| chrUn | 52349901 | 52350568 | 668 SAT1_CF  | blue  | na |
| chrUn | 52350580 | 52351211 | 632 SAT1_CF  | blue  | na |
| chrUn | 52351234 | 52351854 | 621 SAT1_CF  | blue  | na |
| chrUn | 52351894 | 52352853 | 960 SAT1_CF  | blue  | na |
| chrUn | 52352897 | 52353494 | 598 SAT1_CF  | blue  | na |
| chrUn | 52372226 | 52372364 | 139 Carsat3  | green | na |
| chrUn | 52372391 | 52373177 | 787 Carsat3  | green | na |
| chrUn | 52373476 | 52373552 | 77 Carsat3   | green | na |
| chrUn | 52464557 | 52465997 | 1441 SAT1_CF | blue  | na |
| chrUn | 52466040 | 52466720 | 681 SAT1_CF  | blue  | na |
| chrUn | 52466734 | 52467416 | 683 SAT1_CF  | blue  | na |
| chrUn | 52467430 | 52469238 | 1809 SAT1_CF | blue  | na |
| chrUn | 52469283 | 52469830 | 548 SAT1_CF  | blue  | na |
| chrUn | 52469850 | 52469959 | 110 SAT1_CF  | blue  | na |
| chrUn | 52469971 | 52470690 | 720 SAT1_CF  | blue  | na |
| chrUn | 52470706 | 52471381 | 676 SAT1_CF  | blue  | na |
| chrUn | 52471393 | 52472063 | 671 SAT1_CF  | blue  | na |
| chrUn | 52472132 | 52472757 | 626 SAT1_CF  | blue  | na |
| chrUn | 52472770 | 52473766 | 997 SAT1_CF  | blue  | na |
| chrUn | 52475355 | 52476049 | 695 SAT1_CF  | blue  | na |
| chrUn | 52476071 | 52476209 | 139 SAT1_CF  | blue  | na |
| chrUn | 52476222 | 52476722 | 501 SAT1_CF  | blue  | na |
| chrUn | 52479341 | 52479693 | 353 SAT1_CF  | blue  | na |
| chrUn | 52479717 | 52480956 | 1240 SAT1_CF | blue  | na |
| chrUn | 52480999 | 52481339 | 341 SAT1_CF  | blue  | na |
| chrUn | 52487643 | 52488204 | 562 SAT1_CF  | blue  | na |
| chrUn | 52488219 | 52488604 | 386 SAT1_CF  | blue  | na |
| chrUn | 52488631 | 52489536 | 906 SAT1_CF  | blue  | na |

|       |          |          |              |      |    |
|-------|----------|----------|--------------|------|----|
| chrUn | 52490180 | 52490577 | 398 SAT1_CF  | blue | na |
| chrUn | 52490590 | 52491091 | 502 SAT1_CF  | blue | na |
| chrUn | 52491131 | 52492172 | 1042 SAT1_CF | blue | na |
| chrUn | 52492208 | 52493170 | 963 SAT1_CF  | blue | na |
| chrUn | 52493213 | 52493885 | 673 SAT1_CF  | blue | na |
| chrUn | 52493897 | 52494659 | 763 SAT1_CF  | blue | na |
| chrUn | 52494677 | 52495273 | 597 SAT1_CF  | blue | na |
| chrUn | 52496618 | 52497912 | 1295 SAT1_CF | blue | na |
| chrUn | 52497960 | 52498503 | 544 SAT1_CF  | blue | na |
| chrUn | 52498560 | 52499224 | 665 SAT1_CF  | blue | na |
| chrUn | 52499241 | 52499737 | 497 SAT1_CF  | blue | na |
| chrUn | 52499777 | 52500707 | 931 SAT1_CF  | blue | na |
| chrUn | 52500741 | 52501813 | 1073 SAT1_CF | blue | na |
| chrUn | 52501856 | 52502403 | 548 SAT1_CF  | blue | na |
| chrUn | 52502426 | 52503012 | 587 SAT1_CF  | blue | na |
| chrUn | 52504286 | 52504441 | 156 SAT1_CF  | blue | na |
| chrUn | 52504459 | 52505166 | 708 SAT1_CF  | blue | na |
| chrUn | 52505177 | 52505397 | 221 SAT1_CF  | blue | na |
| chrUn | 52506398 | 52506581 | 184 SAT1_CF  | blue | na |
| chrUn | 52506625 | 52507580 | 956 SAT1_CF  | blue | na |
| chrUn | 52507594 | 52508302 | 709 SAT1_CF  | blue | na |
| chrUn | 52508334 | 52508688 | 355 SAT1_CF  | blue | na |
| chrUn | 52508794 | 52509274 | 481 SAT1_CF  | blue | na |
| chrUn | 52509287 | 52509360 | 74 SAT1_CF   | blue | na |
| chrUn | 52509416 | 52509969 | 554 SAT1_CF  | blue | na |
| chrUn | 52509991 | 52511154 | 1164 SAT1_CF | blue | na |
| chrUn | 52511235 | 52511783 | 549 SAT1_CF  | blue | na |
| chrUn | 52511826 | 52512027 | 202 SAT1_CF  | blue | na |
| chrUn | 52512207 | 52512393 | 187 SAT1_CF  | blue | na |
| chrUn | 52512451 | 52512931 | 481 SAT1_CF  | blue | na |
| chrUn | 52512944 | 52513704 | 761 SAT1_CF  | blue | na |
| chrUn | 52513716 | 52514392 | 677 SAT1_CF  | blue | na |
| chrUn | 52514435 | 52516392 | 1958 SAT1_CF | blue | na |
| chrUn | 52516404 | 52517991 | 1588 SAT1_CF | blue | na |
| chrUn | 52518022 | 52519375 | 1354 SAT1_CF | blue | na |
| chrUn | 52519388 | 52520088 | 701 SAT1_CF  | blue | na |
| chrUn | 52520100 | 52521740 | 1641 SAT1_CF | blue | na |
| chrUn | 52521752 | 52521836 | 85 SAT1_CF   | blue | na |
| chrUn | 52521849 | 52522372 | 524 SAT1_CF  | blue | na |
| chrUn | 52522384 | 52522782 | 399 SAT1_CF  | blue | na |
| chrUn | 52522805 | 52523323 | 519 SAT1_CF  | blue | na |
| chrUn | 52523351 | 52524020 | 670 SAT1_CF  | blue | na |

|       |          |          |              |        |    |
|-------|----------|----------|--------------|--------|----|
| chrUn | 52524032 | 52524714 | 683 SAT1_CF  | blue   | na |
| chrUn | 52524725 | 52525217 | 493 SAT1_CF  | blue   | na |
| chrUn | 52525245 | 52526263 | 1019 SAT1_CF | blue   | na |
| chrUn | 52526328 | 52526889 | 562 SAT1_CF  | blue   | na |
| chrUn | 52528305 | 52528878 | 574 SAT1_CF  | blue   | na |
| chrUn | 52528913 | 52529420 | 508 SAT1_CF  | blue   | na |
| chrUn | 52529433 | 52530108 | 676 SAT1_CF  | blue   | na |
| chrUn | 52530151 | 52531137 | 987 SAT1_CF  | blue   | na |
| chrUn | 52531158 | 52532191 | 1034 SAT1_CF | blue   | na |
| chrUn | 52532211 | 52532729 | 519 SAT1_CF  | blue   | na |
| chrUn | 52532742 | 52533414 | 673 SAT1_CF  | blue   | na |
| chrUn | 52533443 | 52533964 | 522 SAT1_CF  | blue   | na |
| chrUn | 52533991 | 52534189 | 199 SAT1_CF  | blue   | na |
| chrUn | 52573275 | 52574322 | 1048 CarSat1 | red    | na |
| chrUn | 52576345 | 52577547 | 1203 CarSat1 | red    | na |
| chrUn | 52577572 | 52578497 | 926 CarSat1  | red    | na |
| chrUn | 52578512 | 52578638 | 127 Carsat2  | orange | na |
| chrUn | 52578527 | 52579134 | 608 CarSat1  | red    | na |
| chrUn | 52579547 | 52580727 | 1181 CarSat1 | red    | na |
| chrUn | 52580828 | 52581492 | 665 CarSat1  | red    | na |
| chrUn | 52581507 | 52581634 | 128 Carsat2  | orange | na |
| chrUn | 52581522 | 52583856 | 2335 CarSat1 | red    | na |
| chrUn | 52584256 | 52586328 | 2073 CarSat1 | red    | na |
| chrUn | 52586353 | 52589009 | 2657 CarSat1 | red    | na |
| chrUn | 52589024 | 52589148 | 125 Carsat2  | orange | na |
| chrUn | 52589039 | 52589832 | 794 CarSat1  | red    | na |
| chrUn | 52590735 | 52592096 | 1362 CarSat1 | red    | na |
| chrUn | 52592111 | 52592234 | 124 Carsat2  | orange | na |
| chrUn | 52592126 | 52592946 | 821 CarSat1  | red    | na |
| chrUn | 52592981 | 52595156 | 2176 CarSat1 | red    | na |
| chrUn | 52595183 | 52596569 | 1387 CarSat1 | red    | na |
| chrUn | 52596588 | 52598900 | 2313 CarSat1 | red    | na |
| chrUn | 52598929 | 52601108 | 2180 CarSat1 | red    | na |
| chrUn | 52601963 | 52603137 | 1175 CarSat1 | red    | na |
| chrUn | 52603174 | 52604267 | 1094 CarSat1 | red    | na |
| chrUn | 52605530 | 52605898 | 369 Carsat2  | orange | na |
| chrUn | 52605568 | 52606863 | 1296 CarSat1 | red    | na |
| chrUn | 52682905 | 52683668 | 764 SAT1_CF  | blue   | na |
| chrUn | 52683680 | 52684866 | 1187 SAT1_CF | blue   | na |
| chrUn | 52684893 | 52685395 | 503 SAT1_CF  | blue   | na |
| chrUn | 52685439 | 52686289 | 851 SAT1_CF  | blue   | na |
| chrUn | 52688370 | 52688447 | 78 SAT1_CF   | blue   | na |

|       |          |          |              |        |    |
|-------|----------|----------|--------------|--------|----|
| chrUn | 52688485 | 52688854 | 370 SAT1_CF  | blue   | na |
| chrUn | 52688882 | 52689391 | 510 SAT1_CF  | blue   | na |
| chrUn | 52689456 | 52689613 | 158 SAT1_CF  | blue   | na |
| chrUn | 52689639 | 52690157 | 519 SAT1_CF  | blue   | na |
| chrUn | 52690177 | 52690775 | 599 SAT1_CF  | blue   | na |
| chrUn | 52690797 | 52691871 | 1075 SAT1_CF | blue   | na |
| chrUn | 52691889 | 52692558 | 670 SAT1_CF  | blue   | na |
| chrUn | 52692601 | 52693557 | 957 SAT1_CF  | blue   | na |
| chrUn | 52693673 | 52694616 | 944 SAT1_CF  | blue   | na |
| chrUn | 52694654 | 52695174 | 521 SAT1_CF  | blue   | na |
| chrUn | 52695187 | 52695295 | 109 SAT1_CF  | blue   | na |
| chrUn | 52695316 | 52697681 | 2366 SAT1_CF | blue   | na |
| chrUn | 52697751 | 52698909 | 1159 SAT1_CF | blue   | na |
| chrUn | 52698922 | 52701174 | 2253 SAT1_CF | blue   | na |
| chrUn | 52701187 | 52701294 | 108 SAT1_CF  | blue   | na |
| chrUn | 52701316 | 52702749 | 1434 SAT1_CF | blue   | na |
| chrUn | 52702761 | 52703875 | 1115 SAT1_CF | blue   | na |
| chrUn | 52703887 | 52705331 | 1445 SAT1_CF | blue   | na |
| chrUn | 52705377 | 52706930 | 1554 SAT1_CF | blue   | na |
| chrUn | 52710259 | 52711130 | 872 Sat2CF   | purple | na |
| chrUn | 52710354 | 52711132 | 779 Sat2CF   | purple | na |
| chrUn | 52710846 | 52711191 | 346 Sat2CF   | purple | na |
| chrUn | 52743103 | 52744270 | 1168 Sat2CF  | purple | na |
| chrUn | 52744162 | 52744341 | 180 Sat2CF   | purple | na |
| chrUn | 52759451 | 52760292 | 842 Sat2CF   | purple | na |
| chrUn | 52861495 | 52862398 | 904 CarSat1  | red    | na |
| chrUn | 52862419 | 52863275 | 857 CarSat1  | red    | na |
| chrUn | 52863429 | 52864468 | 1040 CarSat1 | red    | na |
| chrUn | 52868359 | 52869205 | 847 Sat2CF   | purple | na |
| chrUn | 52868443 | 52869167 | 725 Sat2CF   | purple | na |
| chrUn | 52869058 | 52869226 | 169 Sat2CF   | purple | na |
| chrUn | 52880154 | 52881328 | 1175 Sat2CF  | purple | na |
| chrUn | 52935367 | 52935925 | 559 Sat2CF   | purple | na |
| chrUn | 52935376 | 52935851 | 476 Sat2CF   | purple | na |
| chrUn | 52966473 | 52967087 | 615 SAT1_CF  | blue   | na |
| chrUn | 52967132 | 52967526 | 395 SAT1_CF  | blue   | na |
| chrUn | 52967541 | 52968175 | 635 SAT1_CF  | blue   | na |
| chrUn | 52968201 | 52969323 | 1123 SAT1_CF | blue   | na |
| chrUn | 52969336 | 52970434 | 1099 SAT1_CF | blue   | na |
| chrUn | 52970678 | 52970819 | 142 SAT1_CF  | blue   | na |
| chrUn | 52970863 | 52972195 | 1333 SAT1_CF | blue   | na |
| chrUn | 52972207 | 52973684 | 1478 SAT1_CF | blue   | na |

|       |          |          |              |      |    |
|-------|----------|----------|--------------|------|----|
| chrUn | 52973697 | 52974198 | 502 SAT1_CF  | blue | na |
| chrUn | 52974237 | 52974418 | 182 SAT1_CF  | blue | na |
| chrUn | 52974599 | 52975462 | 864 SAT1_CF  | blue | na |
| chrUn | 52975477 | 52976634 | 1158 SAT1_CF | blue | na |
| chrUn | 52976648 | 52977408 | 761 SAT1_CF  | blue | na |
| chrUn | 52977421 | 52978580 | 1160 SAT1_CF | blue | na |
| chrUn | 52978624 | 52979300 | 677 SAT1_CF  | blue | na |
| chrUn | 52979314 | 52979995 | 682 SAT1_CF  | blue | na |
| chrUn | 52980007 | 52980690 | 684 SAT1_CF  | blue | na |
| chrUn | 52980703 | 52981219 | 517 SAT1_CF  | blue | na |
| chrUn | 52981236 | 52981609 | 374 SAT1_CF  | blue | na |
| chrUn | 52981652 | 52982622 | 971 SAT1_CF  | blue | na |
| chrUn | 52982666 | 52984771 | 2106 SAT1_CF | blue | na |
| chrUn | 52984786 | 52986081 | 1296 SAT1_CF | blue | na |
| chrUn | 52986093 | 52986788 | 696 SAT1_CF  | blue | na |
| chrUn | 52986799 | 52987685 | 887 SAT1_CF  | blue | na |
| chrUn | 52987699 | 52988588 | 890 SAT1_CF  | blue | na |
| chrUn | 52988631 | 52989296 | 666 SAT1_CF  | blue | na |
| chrUn | 52989318 | 52990441 | 1124 SAT1_CF | blue | na |
| chrUn | 52990541 | 52991902 | 1362 SAT1_CF | blue | na |
| chrUn | 52991916 | 52992408 | 493 SAT1_CF  | blue | na |
| chrUn | 52992419 | 52993609 | 1191 SAT1_CF | blue | na |
| chrUn | 53064394 | 53064849 | 456 SAT1_CF  | blue | na |
| chrUn | 53064862 | 53065355 | 494 SAT1_CF  | blue | na |
| chrUn | 53065366 | 53066048 | 683 SAT1_CF  | blue | na |
| chrUn | 53066060 | 53067257 | 1198 SAT1_CF | blue | na |
| chrUn | 53067344 | 53069330 | 1987 SAT1_CF | blue | na |
| chrUn | 53069373 | 53069918 | 546 SAT1_CF  | blue | na |
| chrUn | 53070265 | 53070798 | 534 SAT1_CF  | blue | na |
| chrUn | 53070811 | 53071331 | 521 SAT1_CF  | blue | na |
| chrUn | 53071357 | 53071513 | 157 SAT1_CF  | blue | na |
| chrUn | 53071541 | 53072983 | 1443 SAT1_CF | blue | na |
| chrUn | 53072996 | 53073755 | 760 SAT1_CF  | blue | na |
| chrUn | 53073768 | 53074267 | 500 SAT1_CF  | blue | na |
| chrUn | 53074302 | 53074684 | 383 SAT1_CF  | blue | na |
| chrUn | 53074719 | 53075680 | 962 SAT1_CF  | blue | na |
| chrUn | 53075723 | 53076927 | 1205 SAT1_CF | blue | na |
| chrUn | 53076997 | 53077673 | 677 SAT1_CF  | blue | na |
| chrUn | 53077685 | 53078190 | 506 SAT1_CF  | blue | na |
| chrUn | 53078244 | 53078886 | 643 SAT1_CF  | blue | na |
| chrUn | 53078973 | 53080259 | 1287 SAT1_CF | blue | na |
| chrUn | 53080304 | 53080461 | 158 SAT1_CF  | blue | na |

|       |          |          |              |        |    |
|-------|----------|----------|--------------|--------|----|
| chrUn | 53080476 | 53080999 | 524 SAT1_CF  | blue   | na |
| chrUn | 53081079 | 53081643 | 565 SAT1_CF  | blue   | na |
| chrUn | 53081671 | 53082301 | 631 SAT1_CF  | blue   | na |
| chrUn | 53082344 | 53083021 | 678 SAT1_CF  | blue   | na |
| chrUn | 53083033 | 53083318 | 286 SAT1_CF  | blue   | na |
| chrUn | 53083329 | 53083834 | 506 SAT1_CF  | blue   | na |
| chrUn | 53083854 | 53083963 | 110 SAT1_CF  | blue   | na |
| chrUn | 53083975 | 53084660 | 686 SAT1_CF  | blue   | na |
| chrUn | 53084685 | 53085186 | 502 SAT1_CF  | blue   | na |
| chrUn | 53085215 | 53085663 | 449 SAT1_CF  | blue   | na |
| chrUn | 53085674 | 53086949 | 1276 SAT1_CF | blue   | na |
| chrUn | 53086961 | 53088438 | 1478 SAT1_CF | blue   | na |
| chrUn | 53088456 | 53090168 | 1713 SAT1_CF | blue   | na |
| chrUn | 53090238 | 53091702 | 1465 SAT1_CF | blue   | na |
| chrUn | 53120784 | 53121981 | 1198 CarSat1 | red    | na |
| chrUn | 53123920 | 53125364 | 1445 CarSat1 | red    | na |
| chrUn | 53126614 | 53128057 | 1444 CarSat1 | red    | na |
| chrUn | 53128072 | 53128198 | 127 Carsat2  | orange | na |
| chrUn | 53128087 | 53128624 | 538 CarSat1  | red    | na |
| chrUn | 53131631 | 53132377 | 747 CarSat1  | red    | na |
| chrUn | 53132404 | 53135053 | 2650 CarSat1 | red    | na |
| chrUn | 53135068 | 53135194 | 127 Carsat2  | orange | na |
| chrUn | 53135083 | 53136229 | 1147 CarSat1 | red    | na |
| chrUn | 53136937 | 53139108 | 2172 CarSat1 | red    | na |
| chrUn | 53139935 | 53140459 | 525 CarSat1  | red    | na |
| chrUn | 53140470 | 53140600 | 131 Carsat2  | orange | na |
| chrUn | 53140489 | 53141526 | 1038 CarSat1 | red    | na |
| chrUn | 53142382 | 53143399 | 1018 CarSat1 | red    | na |
| chrUn | 53143414 | 53143541 | 128 Carsat2  | orange | na |
| chrUn | 53143429 | 53144137 | 709 CarSat1  | red    | na |
| chrUn | 53144168 | 53144878 | 711 CarSat1  | red    | na |
| chrUn | 53144908 | 53145614 | 707 CarSat1  | red    | na |
| chrUn | 53145644 | 53148400 | 2757 CarSat1 | red    | na |
| chrUn | 53148421 | 53149136 | 716 CarSat1  | red    | na |
| chrUn | 53149157 | 53149875 | 719 CarSat1  | red    | na |
| chrUn | 53149896 | 53150340 | 445 CarSat1  | red    | na |
| chrUn | 53150370 | 53152087 | 1718 CarSat1 | red    | na |
| chrUn | 53152108 | 53152826 | 719 CarSat1  | red    | na |
| chrUn | 53152847 | 53154843 | 1997 CarSat1 | red    | na |
| chrUn | 53156277 | 53157577 | 1301 CarSat1 | red    | na |
| chrUn | 53158587 | 53159322 | 736 SAT1_CF  | blue   | na |
| chrUn | 53159335 | 53159816 | 482 SAT1_CF  | blue   | na |



|       |          |          |              |        |    |
|-------|----------|----------|--------------|--------|----|
| chrUn | 53160124 | 53160289 | 166 SAT1_CF  | blue   | na |
| chrUn | 53160322 | 53162120 | 1799 SAT1_CF | blue   | na |
| chrUn | 53162134 | 53162763 | 630 SAT1_CF  | blue   | na |
| chrUn | 53162784 | 53162892 | 109 SAT1_CF  | blue   | na |
| chrUn | 53162904 | 53163587 | 684 SAT1_CF  | blue   | na |
| chrUn | 53163600 | 53164119 | 520 SAT1_CF  | blue   | na |
| chrUn | 53164187 | 53165085 | 899 SAT1_CF  | blue   | na |
| chrUn | 53165140 | 53166138 | 999 SAT1_CF  | blue   | na |
| chrUn | 53166181 | 53166849 | 669 SAT1_CF  | blue   | na |
| chrUn | 53166867 | 53167417 | 551 SAT1_CF  | blue   | na |
| chrUn | 53167440 | 53167511 | 72 SAT1_CF   | blue   | na |
| chrUn | 53167524 | 53168285 | 762 SAT1_CF  | blue   | na |
| chrUn | 53168298 | 53168799 | 502 SAT1_CF  | blue   | na |
| chrUn | 53168886 | 53170879 | 1994 SAT1_CF | blue   | na |
| chrUn | 53170922 | 53171596 | 675 SAT1_CF  | blue   | na |
| chrUn | 53171608 | 53172182 | 575 SAT1_CF  | blue   | na |
| chrUn | 53172235 | 53172311 | 77 SAT1_CF   | blue   | na |
| chrUn | 53172324 | 53173159 | 836 SAT1_CF  | blue   | na |
| chrUn | 53173172 | 53174485 | 1314 SAT1_CF | blue   | na |
| chrUn | 53174497 | 53175011 | 515 SAT1_CF  | blue   | na |
| chrUn | 53175037 | 53175572 | 536 SAT1_CF  | blue   | na |
| chrUn | 53175617 | 53176343 | 727 SAT1_CF  | blue   | na |
| chrUn | 53176386 | 53177062 | 677 SAT1_CF  | blue   | na |
| chrUn | 53177074 | 53177676 | 603 SAT1_CF  | blue   | na |
| chrUn | 53177687 | 53178367 | 681 SAT1_CF  | blue   | na |
| chrUn | 53178379 | 53179068 | 690 SAT1_CF  | blue   | na |
| chrUn | 53179082 | 53180951 | 1870 SAT1_CF | blue   | na |
| chrUn | 53180974 | 53181079 | 106 SAT1_CF  | blue   | na |
| chrUn | 53181092 | 53181592 | 501 SAT1_CF  | blue   | na |
| chrUn | 53181637 | 53183488 | 1852 SAT1_CF | blue   | na |
| chrUn | 53183530 | 53184588 | 1059 SAT1_CF | blue   | na |
| chrUn | 53184611 | 53184682 | 72 SAT1_CF   | blue   | na |
| chrUn | 53184695 | 53185550 | 856 SAT1_CF  | blue   | na |
| chrUn | 53215661 | 53216498 | 838 Sat2CF   | purple | na |
| chrUn | 53215735 | 53216461 | 727 Sat2CF   | purple | na |
| chrUn | 53216351 | 53216519 | 169 Sat2CF   | purple | na |
| chrUn | 53231488 | 53232708 | 1221 Sat2CF  | purple | na |
| chrUn | 53242486 | 53242899 | 414 Sat2CF   | purple | na |
| chrUn | 53247069 | 53249294 | 2226 CarSat1 | red    | na |
| chrUn | 53249327 | 53254023 | 4697 CarSat1 | red    | na |
| chrUn | 53254211 | 53259316 | 5106 CarSat1 | red    | na |
| chrUn | 53259331 | 53259457 | 127 Carsat2  | orange | na |

|       |          |          |      |         |        |    |
|-------|----------|----------|------|---------|--------|----|
| chrUn | 53259346 | 53262977 | 3632 | CarSat1 | red    | na |
| chrUn | 53263286 | 53269673 | 6388 | CarSat1 | red    | na |
| chrUn | 53269689 | 53271145 | 1457 | CarSat1 | red    | na |
| chrUn | 53271161 | 53271882 | 722  | CarSat1 | red    | na |
| chrUn | 53271898 | 53272619 | 722  | CarSat1 | red    | na |
| chrUn | 53272644 | 53274173 | 1530 | CarSat1 | red    | na |
| chrUn | 53289136 | 53290213 | 1078 | Sat2CF  | purple | na |
| chrUn | 53306693 | 53307233 | 541  | CarSat1 | red    | na |
| chrUn | 53307254 | 53308434 | 1181 | CarSat1 | red    | na |
| chrUn | 53308464 | 53309171 | 708  | CarSat1 | red    | na |
| chrUn | 53309201 | 53310431 | 1231 | CarSat1 | red    | na |
| chrUn | 53310447 | 53311899 | 1453 | CarSat1 | red    | na |
| chrUn | 53311923 | 53312859 | 937  | CarSat1 | red    | na |
| chrUn | 53312889 | 53313868 | 980  | CarSat1 | red    | na |
| chrUn | 53313895 | 53321466 | 7572 | CarSat1 | red    | na |
| chrUn | 53321480 | 53324884 | 3405 | CarSat1 | red    | na |
| chrUn | 53324905 | 53327804 | 2900 | CarSat1 | red    | na |
| chrUn | 53327986 | 53330464 | 2479 | CarSat1 | red    | na |
| chrUn | 53330497 | 53330934 | 438  | CarSat1 | red    | na |
| chrUn | 53331165 | 53332470 | 1306 | CarSat1 | red    | na |
| chrUn | 53332659 | 53333453 | 795  | CarSat1 | red    | na |
| chrUn | 53334494 | 53335377 | 884  | SAT1_CF | blue   | na |
| chrUn | 53335391 | 53335899 | 509  | SAT1_CF | blue   | na |
| chrUn | 53335912 | 53335993 | 82   | SAT1_CF | blue   | na |
| chrUn | 53336041 | 53337364 | 1324 | SAT1_CF | blue   | na |
| chrUn | 53337379 | 53338062 | 684  | SAT1_CF | blue   | na |
| chrUn | 53338074 | 53339001 | 928  | SAT1_CF | blue   | na |
| chrUn | 53339014 | 53340058 | 1045 | SAT1_CF | blue   | na |
| chrUn | 53340098 | 53340598 | 501  | SAT1_CF | blue   | na |
| chrUn | 53340616 | 53342096 | 1481 | SAT1_CF | blue   | na |
| chrUn | 53342107 | 53342509 | 403  | SAT1_CF | blue   | na |
| chrUn | 53342549 | 53343637 | 1089 | SAT1_CF | blue   | na |
| chrUn | 53343655 | 53344980 | 1326 | SAT1_CF | blue   | na |
| chrUn | 53345005 | 53345329 | 325  | SAT1_CF | blue   | na |
| chrUn | 53345407 | 53345915 | 509  | SAT1_CF | blue   | na |
| chrUn | 53345998 | 53346579 | 582  | SAT1_CF | blue   | na |
| chrUn | 53346601 | 53347352 | 752  | SAT1_CF | blue   | na |
| chrUn | 53347365 | 53347981 | 617  | SAT1_CF | blue   | na |
| chrUn | 53348194 | 53348349 | 156  | SAT1_CF | blue   | na |
| chrUn | 53348375 | 53351265 | 2891 | SAT1_CF | blue   | na |
| chrUn | 53352344 | 53352942 | 599  | SAT1_CF | blue   | na |
| chrUn | 53352954 | 53353629 | 676  | SAT1_CF | blue   | na |

|       |          |          |              |      |    |
|-------|----------|----------|--------------|------|----|
| chrUn | 53353671 | 53354884 | 1214 SAT1_CF | blue | na |
| chrUn | 53355228 | 53355679 | 452 SAT1_CF  | blue | na |
| chrUn | 53355693 | 53356798 | 1106 SAT1_CF | blue | na |
| chrUn | 53356842 | 53357801 | 960 SAT1_CF  | blue | na |
| chrUn | 53357861 | 53358795 | 935 SAT1_CF  | blue | na |
| chrUn | 53358808 | 53361000 | 2193 SAT1_CF | blue | na |
| chrUn | 53361225 | 53361382 | 158 SAT1_CF  | blue | na |
| chrUn | 53361408 | 53361927 | 520 SAT1_CF  | blue | na |
| chrUn | 53361947 | 53362722 | 776 SAT1_CF  | blue | na |
| chrUn | 53367859 | 53368185 | 327 SAT1_CF  | blue | na |
| chrUn | 53384438 | 53385921 | 1484 CarSat1 | red  | na |
| chrUn | 53385949 | 53386788 | 840 CarSat1  | red  | na |
| chrUn | 53386809 | 53388401 | 1593 CarSat1 | red  | na |
| chrUn | 53439800 | 53440906 | 1107 Sat7CF  | lime | na |
| chrUn | 53486353 | 53487751 | 1399 CarSat1 | red  | na |
| chrUn | 53487772 | 53488402 | 631 CarSat1  | red  | na |
| chrUn | 53488683 | 53489700 | 1018 CarSat1 | red  | na |
| chrUn | 53499904 | 53502056 | 2153 CarSat1 | red  | na |
| chrUn | 53502142 | 53502632 | 491 CarSat1  | red  | na |
| chrUn | 53502663 | 53503997 | 1335 CarSat1 | red  | na |
| chrUn | 53504024 | 53504537 | 514 CarSat1  | red  | na |
| chrUn | 53504568 | 53506012 | 1445 CarSat1 | red  | na |
| chrUn | 53506235 | 53507124 | 890 CarSat1  | red  | na |
| chrUn | 53517121 | 53517555 | 435 SAT1_CF  | blue | na |
| chrUn | 53517567 | 53518250 | 684 SAT1_CF  | blue | na |
| chrUn | 53518262 | 53519190 | 929 SAT1_CF  | blue | na |
| chrUn | 53519203 | 53520675 | 1473 SAT1_CF | blue | na |
| chrUn | 53520705 | 53521230 | 526 SAT1_CF  | blue | na |
| chrUn | 53521293 | 53521947 | 655 SAT1_CF  | blue | na |
| chrUn | 53521960 | 53523294 | 1335 SAT1_CF | blue | na |
| chrUn | 53523319 | 53524597 | 1279 SAT1_CF | blue | na |
| chrUn | 53524646 | 53525146 | 501 SAT1_CF  | blue | na |
| chrUn | 53525159 | 53525843 | 685 SAT1_CF  | blue | na |
| chrUn | 53525855 | 53528962 | 3108 SAT1_CF | blue | na |
| chrUn | 53528974 | 53529659 | 686 SAT1_CF  | blue | na |
| chrUn | 53529671 | 53532816 | 3146 SAT1_CF | blue | na |
| chrUn | 53532832 | 53532936 | 105 SAT1_CF  | blue | na |
| chrUn | 53532957 | 53533512 | 556 SAT1_CF  | blue | na |
| chrUn | 53533524 | 53534444 | 921 SAT1_CF  | blue | na |
| chrUn | 53534486 | 53535536 | 1051 SAT1_CF | blue | na |
| chrUn | 53535875 | 53537653 | 1779 SAT1_CF | blue | na |
| chrUn | 53538165 | 53538470 | 306 SAT1_CF  | blue | na |

|       |          |          |              |        |    |
|-------|----------|----------|--------------|--------|----|
| chrUn | 53538488 | 53539003 | 516 SAT1_CF  | blue   | na |
| chrUn | 53539029 | 53540133 | 1105 SAT1_CF | blue   | na |
| chrUn | 53540184 | 53541963 | 1780 SAT1_CF | blue   | na |
| chrUn | 53541977 | 53542379 | 403 SAT1_CF  | blue   | na |
| chrUn | 53542419 | 53543785 | 1367 SAT1_CF | blue   | na |
| chrUn | 53543802 | 53544306 | 505 SAT1_CF  | blue   | na |
| chrUn | 53581180 | 53582348 | 1169 CarSat1 | red    | na |
| chrUn | 53587957 | 53589208 | 1252 CarSat1 | red    | na |
| chrUn | 53589243 | 53591918 | 2676 CarSat1 | red    | na |
| chrUn | 53591932 | 53592059 | 128 Carsat2  | orange | na |
| chrUn | 53591948 | 53592654 | 707 CarSat1  | red    | na |
| chrUn | 53592669 | 53592791 | 123 Carsat2  | orange | na |
| chrUn | 53592684 | 53593569 | 886 CarSat1  | red    | na |
| chrUn | 53593908 | 53594366 | 459 CarSat1  | red    | na |
| chrUn | 53594381 | 53594507 | 127 Carsat2  | orange | na |
| chrUn | 53594396 | 53595103 | 708 CarSat1  | red    | na |
| chrUn | 53595118 | 53595245 | 128 Carsat2  | orange | na |
| chrUn | 53595133 | 53595803 | 671 CarSat1  | red    | na |
| chrUn | 53596952 | 53598716 | 1765 CarSat1 | red    | na |
| chrUn | 53600512 | 53601197 | 686 CarSat1  | red    | na |
| chrUn | 53601218 | 53602277 | 1060 CarSat1 | red    | na |
| chrUn | 53604999 | 53605761 | 763 CarSat1  | red    | na |
| chrUn | 53605794 | 53606546 | 753 CarSat1  | red    | na |
| chrUn | 53608331 | 53609871 | 1541 CarSat1 | red    | na |
| chrUn | 53616428 | 53617144 | 717 CarSat1  | red    | na |
| chrUn | 53652639 | 53653144 | 506 SAT1_CF  | blue   | na |
| chrUn | 53653191 | 53653688 | 498 SAT1_CF  | blue   | na |
| chrUn | 53653741 | 53654167 | 427 SAT1_CF  | blue   | na |
| chrUn | 53654201 | 53654979 | 779 SAT1_CF  | blue   | na |
| chrUn | 53654992 | 53655108 | 117 SAT1_CF  | blue   | na |
| chrUn | 53655120 | 53655791 | 672 SAT1_CF  | blue   | na |
| chrUn | 53655814 | 53656314 | 501 SAT1_CF  | blue   | na |
| chrUn | 53656380 | 53656516 | 137 SAT1_CF  | blue   | na |
| chrUn | 53656544 | 53657773 | 1230 SAT1_CF | blue   | na |
| chrUn | 53657819 | 53658838 | 1020 SAT1_CF | blue   | na |
| chrUn | 53658899 | 53659443 | 545 SAT1_CF  | blue   | na |
| chrUn | 53659464 | 53659573 | 110 SAT1_CF  | blue   | na |
| chrUn | 53659585 | 53660343 | 759 SAT1_CF  | blue   | na |
| chrUn | 53660357 | 53660857 | 501 SAT1_CF  | blue   | na |
| chrUn | 53660944 | 53661833 | 890 SAT1_CF  | blue   | na |
| chrUn | 53661900 | 53662682 | 783 SAT1_CF  | blue   | na |
| chrUn | 53662724 | 53663884 | 1161 SAT1_CF | blue   | na |

|       |          |          |              |      |    |
|-------|----------|----------|--------------|------|----|
| chrUn | 53663897 | 53664824 | 928 SAT1_CF  | blue | na |
| chrUn | 53664836 | 53665507 | 672 SAT1_CF  | blue | na |
| chrUn | 53665531 | 53666291 | 761 SAT1_CF  | blue | na |
| chrUn | 53666304 | 53669060 | 2757 SAT1_CF | blue | na |
| chrUn | 53669083 | 53669188 | 106 SAT1_CF  | blue | na |
| chrUn | 53669201 | 53669947 | 747 SAT1_CF  | blue | na |
| chrUn | 53669974 | 53670475 | 502 SAT1_CF  | blue | na |
| chrUn | 53670521 | 53671449 | 929 SAT1_CF  | blue | na |
| chrUn | 53671466 | 53672923 | 1458 SAT1_CF | blue | na |
| chrUn | 53672980 | 53673586 | 607 SAT1_CF  | blue | na |
| chrUn | 53673657 | 53674200 | 544 SAT1_CF  | blue | na |
| chrUn | 53674243 | 53674789 | 547 SAT1_CF  | blue | na |
| chrUn | 53674833 | 53675830 | 998 SAT1_CF  | blue | na |
| chrUn | 53675873 | 53676552 | 680 SAT1_CF  | blue | na |
| chrUn | 53676564 | 53677371 | 808 SAT1_CF  | blue | na |
| chrUn | 53677398 | 53677918 | 521 SAT1_CF  | blue | na |
| chrUn | 53677939 | 53678887 | 949 SAT1_CF  | blue | na |
| chrUn | 53680047 | 53680831 | 785 SAT1_CF  | blue | na |
| chrUn | 53680876 | 53681421 | 546 SAT1_CF  | blue | na |
| chrUn | 53683038 | 53683458 | 421 SAT1_CF  | blue | na |
| chrUn | 53683471 | 53684155 | 685 SAT1_CF  | blue | na |
| chrUn | 53684168 | 53685971 | 1804 SAT1_CF | blue | na |
| chrUn | 53686050 | 53686215 | 166 SAT1_CF  | blue | na |
| chrUn | 53686396 | 53686581 | 186 SAT1_CF  | blue | na |
| chrUn | 53686598 | 53687118 | 521 SAT1_CF  | blue | na |
| chrUn | 53687131 | 53687237 | 107 SAT1_CF  | blue | na |
| chrUn | 53687259 | 53687816 | 558 SAT1_CF  | blue | na |
| chrUn | 53687828 | 53690538 | 2711 SAT1_CF | blue | na |
| chrUn | 53690625 | 53691123 | 499 SAT1_CF  | blue | na |
| chrUn | 53691136 | 53691241 | 106 SAT1_CF  | blue | na |
| chrUn | 53691264 | 53692439 | 1176 SAT1_CF | blue | na |
| chrUn | 53692472 | 53692628 | 157 SAT1_CF  | blue | na |
| chrUn | 53692673 | 53693173 | 501 SAT1_CF  | blue | na |
| chrUn | 53693186 | 53693549 | 364 SAT1_CF  | blue | na |
| chrUn | 53694275 | 53694685 | 411 SAT1_CF  | blue | na |
| chrUn | 53694765 | 53695289 | 525 SAT1_CF  | blue | na |
| chrUn | 53695304 | 53695418 | 115 SAT1_CF  | blue | na |
| chrUn | 53695866 | 53697565 | 1700 SAT1_CF | blue | na |
| chrUn | 53697608 | 53699231 | 1624 SAT1_CF | blue | na |
| chrUn | 53699312 | 53699891 | 580 SAT1_CF  | blue | na |
| chrUn | 53699904 | 53701238 | 1335 SAT1_CF | blue | na |
| chrUn | 53701281 | 53702245 | 965 SAT1_CF  | blue | na |

|       |          |          |              |       |    |
|-------|----------|----------|--------------|-------|----|
| chrUn | 53702257 | 53702410 | 154 SAT1_CF  | blue  | na |
| chrUn | 53703413 | 53704127 | 715 SAT1_CF  | blue  | na |
| chrUn | 53704170 | 53705623 | 1454 SAT1_CF | blue  | na |
| chrUn | 53705644 | 53706163 | 520 SAT1_CF  | blue  | na |
| chrUn | 53706176 | 53706429 | 254 SAT1_CF  | blue  | na |
| chrUn | 53706441 | 53707165 | 725 SAT1_CF  | blue  | na |
| chrUn | 53707176 | 53707668 | 493 SAT1_CF  | blue  | na |
| chrUn | 53707682 | 53709231 | 1550 SAT1_CF | blue  | na |
| chrUn | 53803343 | 53804552 | 1210 Carsat3 | green | na |
| chrUn | 53804936 | 53805176 | 241 Carsat3  | green | na |
| chrUn | 53821916 | 53822215 | 300 Carsat3  | green | na |
| chrUn | 53840492 | 53841281 | 790 SAT1_CF  | blue  | na |
| chrUn | 53841324 | 53841954 | 631 SAT1_CF  | blue  | na |
| chrUn | 53841995 | 53842500 | 506 SAT1_CF  | blue  | na |
| chrUn | 53844185 | 53845214 | 1030 SAT1_CF | blue  | na |
| chrUn | 53848286 | 53849220 | 935 SAT1_CF  | blue  | na |
| chrUn | 53849233 | 53849677 | 445 SAT1_CF  | blue  | na |
| chrUn | 53852001 | 53852197 | 197 SAT1_CF  | blue  | na |
| chrUn | 53852210 | 53853646 | 1437 SAT1_CF | blue  | na |
| chrUn | 53853661 | 53853903 | 243 SAT1_CF  | blue  | na |
| chrUn | 53855612 | 53855903 | 292 SAT1_CF  | blue  | na |
| chrUn | 53855917 | 53856026 | 110 SAT1_CF  | blue  | na |
| chrUn | 53856047 | 53856593 | 547 SAT1_CF  | blue  | na |
| chrUn | 53856636 | 53857114 | 479 SAT1_CF  | blue  | na |
| chrUn | 53859946 | 53860292 | 347 SAT1_CF  | blue  | na |
| chrUn | 53860306 | 53860636 | 331 SAT1_CF  | blue  | na |
| chrUn | 53860675 | 53861314 | 640 SAT1_CF  | blue  | na |
| chrUn | 53867453 | 53868160 | 708 SAT1_CF  | blue  | na |
| chrUn | 53868204 | 53868749 | 546 SAT1_CF  | blue  | na |
| chrUn | 53868762 | 53869461 | 700 SAT1_CF  | blue  | na |
| chrUn | 53869479 | 53870157 | 679 SAT1_CF  | blue  | na |
| chrUn | 53870184 | 53871250 | 1067 SAT1_CF | blue  | na |
| chrUn | 53871271 | 53872706 | 1436 SAT1_CF | blue  | na |
| chrUn | 53872748 | 53872913 | 166 SAT1_CF  | blue  | na |
| chrUn | 53873096 | 53873281 | 186 SAT1_CF  | blue  | na |
| chrUn | 53873298 | 53873811 | 514 SAT1_CF  | blue  | na |
| chrUn | 53873831 | 53873939 | 109 SAT1_CF  | blue  | na |
| chrUn | 53873959 | 53874564 | 606 SAT1_CF  | blue  | na |
| chrUn | 53875003 | 53876517 | 1515 SAT1_CF | blue  | na |
| chrUn | 53876543 | 53877062 | 520 SAT1_CF  | blue  | na |
| chrUn | 53877075 | 53877757 | 683 SAT1_CF  | blue  | na |
| chrUn | 53877769 | 53878718 | 950 SAT1_CF  | blue  | na |

|       |          |          |              |        |    |
|-------|----------|----------|--------------|--------|----|
| chrUn | 53878732 | 53879352 | 621 SAT1_CF  | blue   | na |
| chrUn | 53880109 | 53880612 | 504 SAT1_CF  | blue   | na |
| chrUn | 53880838 | 53881351 | 514 SAT1_CF  | blue   | na |
| chrUn | 53881534 | 53881784 | 251 SAT1_CF  | blue   | na |
| chrUn | 53881835 | 53883020 | 1186 SAT1_CF | blue   | na |
| chrUn | 53883063 | 53883626 | 564 SAT1_CF  | blue   | na |
| chrUn | 53884333 | 53884492 | 160 SAT1_CF  | blue   | na |
| chrUn | 53884505 | 53885830 | 1326 SAT1_CF | blue   | na |
| chrUn | 53885876 | 53886182 | 307 SAT1_CF  | blue   | na |
| chrUn | 53892104 | 53892270 | 167 Sat2CF   | purple | na |
| chrUn | 53892132 | 53893129 | 998 Sat2CF   | purple | na |
| chrUn | 53892176 | 53893040 | 865 Sat2CF   | purple | na |
| chrUn | 53892997 | 53893164 | 168 Sat2CF   | purple | na |
| chrUn | 53962502 | 53963171 | 670 Sat7CF   | lime   | na |
| chrUn | 53997002 | 53998106 | 1105 Sat2CF  | purple | na |
| chrUn | 54072346 | 54073266 | 921 CarSat1  | red    | na |
| chrUn | 54073280 | 54074728 | 1449 CarSat1 | red    | na |
| chrUn | 54074764 | 54075480 | 717 CarSat1  | red    | na |
| chrUn | 54075495 | 54076205 | 711 CarSat1  | red    | na |
| chrUn | 54076235 | 54077165 | 931 CarSat1  | red    | na |
| chrUn | 54077198 | 54078436 | 1239 CarSat1 | red    | na |
| chrUn | 54078451 | 54079158 | 708 CarSat1  | red    | na |
| chrUn | 54079188 | 54080636 | 1449 CarSat1 | red    | na |
| chrUn | 54080666 | 54082109 | 1444 CarSat1 | red    | na |
| chrUn | 54082139 | 54084058 | 1920 CarSat1 | red    | na |
| chrUn | 54084079 | 54085083 | 1005 CarSat1 | red    | na |
| chrUn | 54085098 | 54085824 | 727 CarSat1  | red    | na |
| chrUn | 54085839 | 54086769 | 931 CarSat1  | red    | na |
| chrUn | 54086802 | 54087288 | 487 CarSat1  | red    | na |
| chrUn | 54087318 | 54088025 | 708 CarSat1  | red    | na |
| chrUn | 54088055 | 54088766 | 712 CarSat1  | red    | na |
| chrUn | 54088796 | 54089502 | 707 CarSat1  | red    | na |
| chrUn | 54089532 | 54090253 | 722 CarSat1  | red    | na |
| chrUn | 54090268 | 54091198 | 931 CarSat1  | red    | na |
| chrUn | 54091231 | 54093946 | 2716 CarSat1 | red    | na |
| chrUn | 54093961 | 54094668 | 708 CarSat1  | red    | na |
| chrUn | 54094698 | 54095409 | 712 CarSat1  | red    | na |
| chrUn | 54095439 | 54096163 | 725 CarSat1  | red    | na |
| chrUn | 54096178 | 54096884 | 707 CarSat1  | red    | na |
| chrUn | 54096914 | 54097635 | 722 CarSat1  | red    | na |
| chrUn | 54097650 | 54098217 | 568 CarSat1  | red    | na |
| chrUn | 54188157 | 54189066 | 910 CarSat1  | red    | na |

|       |          |          |      |         |        |    |
|-------|----------|----------|------|---------|--------|----|
| chrUn | 54189097 | 54190686 | 1590 | CarSat1 | red    | na |
| chrUn | 54190717 | 54192304 | 1588 | CarSat1 | red    | na |
| chrUn | 54192325 | 54193922 | 1598 | CarSat1 | red    | na |
| chrUn | 54193943 | 54195540 | 1598 | CarSat1 | red    | na |
| chrUn | 54195561 | 54197158 | 1598 | CarSat1 | red    | na |
| chrUn | 54197189 | 54198772 | 1584 | CarSat1 | red    | na |
| chrUn | 54198793 | 54200390 | 1598 | CarSat1 | red    | na |
| chrUn | 54200421 | 54202012 | 1592 | CarSat1 | red    | na |
| chrUn | 54202033 | 54203631 | 1599 | CarSat1 | red    | na |
| chrUn | 54203652 | 54205253 | 1602 | CarSat1 | red    | na |
| chrUn | 54205284 | 54206978 | 1695 | CarSat1 | red    | na |
| chrUn | 54207276 | 54208456 | 1181 | CarSat1 | red    | na |
| chrUn | 54208487 | 54210076 | 1590 | CarSat1 | red    | na |
| chrUn | 54210097 | 54211697 | 1601 | CarSat1 | red    | na |
| chrUn | 54211718 | 54213310 | 1593 | CarSat1 | red    | na |
| chrUn | 54213341 | 54214230 | 890  | CarSat1 | red    | na |
| chrUn | 54317952 | 54319771 | 1820 | CarSat1 | red    | na |
| chrUn | 54319944 | 54321305 | 1362 | CarSat1 | red    | na |
| chrUn | 54321409 | 54327626 | 6218 | CarSat1 | red    | na |
| chrUn | 54328464 | 54329255 | 792  | CarSat1 | red    | na |
| chrUn | 54329282 | 54331467 | 2186 | CarSat1 | red    | na |
| chrUn | 54331494 | 54332371 | 878  | CarSat1 | red    | na |
| chrUn | 54332905 | 54335671 | 2767 | CarSat1 | red    | na |
| chrUn | 54335697 | 54336205 | 509  | CarSat1 | red    | na |
| chrUn | 54336244 | 54336943 | 700  | CarSat1 | red    | na |
| chrUn | 54336970 | 54338064 | 1095 | CarSat1 | red    | na |
| chrUn | 54338561 | 54339746 | 1186 | CarSat1 | red    | na |
| chrUn | 54342155 | 54343368 | 1214 | CarSat1 | red    | na |
| chrUn | 54343744 | 54344793 | 1050 | CarSat1 | red    | na |
| chrUn | 54345350 | 54347471 | 2122 | CarSat1 | red    | na |
| chrUn | 54348431 | 54349658 | 1228 | CarSat1 | red    | na |
| chrUn | 54361272 | 54362009 | 738  | Sat2CF  | purple | na |
| chrUn | 54361346 | 54362007 | 662  | Sat2CF  | purple | na |
| chrUn | 54380555 | 54381224 | 670  | Sat7CF  | lime   | na |
| chrUn | 54401270 | 54403630 | 2361 | CarSat1 | red    | na |
| chrUn | 54403661 | 54405112 | 1452 | CarSat1 | red    | na |
| chrUn | 54417569 | 54419350 | 1782 | CarSat1 | red    | na |
| chrUn | 54427355 | 54427926 | 572  | CarSat1 | red    | na |
| chrUn | 54427947 | 54428987 | 1041 | CarSat1 | red    | na |
| chrUn | 54432031 | 54433281 | 1251 | Sat2CF  | purple | na |
| chrUn | 54432067 | 54433151 | 1085 | Sat2CF  | purple | na |
| chrUn | 54444243 | 54446844 | 2602 | CarSat1 | red    | na |



|       |          |          |      |         |        |    |
|-------|----------|----------|------|---------|--------|----|
| chrUn | 54446877 | 54447362 | 486  | CarSat1 | red    | na |
| chrUn | 54447399 | 54448116 | 718  | CarSat1 | red    | na |
| chrUn | 54448131 | 54448852 | 722  | CarSat1 | red    | na |
| chrUn | 54448867 | 54450329 | 1463 | CarSat1 | red    | na |
| chrUn | 54450344 | 54451806 | 1463 | CarSat1 | red    | na |
| chrUn | 54451821 | 54452279 | 459  | CarSat1 | red    | na |
| chrUn | 54452291 | 54453814 | 1524 | CarSat1 | red    | na |
| chrUn | 54453965 | 54454596 | 632  | CarSat1 | red    | na |
| chrUn | 54454617 | 54461226 | 6610 | CarSat1 | red    | na |
| chrUn | 54461247 | 54465390 | 4144 | CarSat1 | red    | na |
| chrUn | 54465424 | 54469799 | 4376 | CarSat1 | red    | na |
| chrUn | 54485536 | 54486671 | 1136 | Sat2CF  | purple | na |
| chrUn | 54536264 | 54536709 | 446  | SAT1_CF | blue   | na |
| chrUn | 54536722 | 54537241 | 520  | SAT1_CF | blue   | na |
| chrUn | 54537309 | 54539301 | 1993 | SAT1_CF | blue   | na |
| chrUn | 54539344 | 54540536 | 1193 | SAT1_CF | blue   | na |
| chrUn | 54540604 | 54540959 | 356  | SAT1_CF | blue   | na |
| chrUn | 54540975 | 54541514 | 540  | SAT1_CF | blue   | na |
| chrUn | 54541593 | 54542556 | 964  | SAT1_CF | blue   | na |
| chrUn | 54542601 | 54543278 | 678  | SAT1_CF | blue   | na |
| chrUn | 54543290 | 54544000 | 711  | SAT1_CF | blue   | na |
| chrUn | 54544021 | 54544129 | 109  | SAT1_CF | blue   | na |
| chrUn | 54544141 | 54544660 | 520  | SAT1_CF | blue   | na |
| chrUn | 54544728 | 54545586 | 859  | SAT1_CF | blue   | na |
| chrUn | 54545624 | 54546167 | 544  | SAT1_CF | blue   | na |
| chrUn | 54546209 | 54547061 | 853  | SAT1_CF | blue   | na |
| chrUn | 54547079 | 54547688 | 610  | SAT1_CF | blue   | na |
| chrUn | 54547701 | 54548404 | 704  | SAT1_CF | blue   | na |
| chrUn | 54548419 | 54550919 | 2501 | SAT1_CF | blue   | na |
| chrUn | 54550942 | 54551047 | 106  | SAT1_CF | blue   | na |
| chrUn | 54551060 | 54551561 | 502  | SAT1_CF | blue   | na |
| chrUn | 54551597 | 54551782 | 186  | SAT1_CF | blue   | na |
| chrUn | 54551963 | 54552169 | 207  | SAT1_CF | blue   | na |
| chrUn | 54552212 | 54554011 | 1800 | SAT1_CF | blue   | na |
| chrUn | 54554025 | 54554705 | 681  | SAT1_CF | blue   | na |
| chrUn | 54554717 | 54555400 | 684  | SAT1_CF | blue   | na |
| chrUn | 54555413 | 54555931 | 519  | SAT1_CF | blue   | na |
| chrUn | 54555999 | 54556514 | 516  | SAT1_CF | blue   | na |
| chrUn | 54556533 | 54557941 | 1409 | SAT1_CF | blue   | na |
| chrUn | 54557968 | 54558488 | 521  | SAT1_CF | blue   | na |
| chrUn | 54558505 | 54558690 | 186  | SAT1_CF | blue   | na |
| chrUn | 54558872 | 54559037 | 166  | SAT1_CF | blue   | na |

|       |          |          |      |         |      |    |
|-------|----------|----------|------|---------|------|----|
| chrUn | 54559079 | 54561734 | 2656 | SAT1_CF | blue | na |
| chrUn | 54562736 | 54564258 | 1523 | CarSat1 | red  | na |
| chrUn | 54564279 | 54565485 | 1207 | CarSat1 | red  | na |
| chrUn | 54565509 | 54568419 | 2911 | CarSat1 | red  | na |
| chrUn | 54568452 | 54572100 | 3649 | CarSat1 | red  | na |
| chrUn | 54572133 | 54573573 | 1441 | CarSat1 | red  | na |
| chrUn | 54573606 | 54574844 | 1239 | CarSat1 | red  | na |
| chrUn | 54574866 | 54575696 | 831  | CarSat1 | red  | na |
| chrUn | 54576243 | 54578513 | 2271 | CarSat1 | red  | na |
| chrUn | 54578550 | 54581470 | 2921 | CarSat1 | red  | na |
| chrUn | 54581485 | 54582191 | 707  | CarSat1 | red  | na |
| chrUn | 54582220 | 54584626 | 2407 | CarSat1 | red  | na |
| chrUn | 54584651 | 54585872 | 1222 | CarSat1 | red  | na |
| chrUn | 54585902 | 54586838 | 937  | CarSat1 | red  | na |
| chrUn | 54586863 | 54587823 | 961  | CarSat1 | red  | na |
| chrUn | 54587844 | 54588736 | 893  | CarSat1 | red  | na |
| chrUn | 54629661 | 54630177 | 517  | CarSat1 | red  | na |
| chrUn | 54630204 | 54632386 | 2183 | CarSat1 | red  | na |
| chrUn | 54632413 | 54637057 | 4645 | CarSat1 | red  | na |
| chrUn | 54637082 | 54637782 | 701  | CarSat1 | red  | na |
| chrUn | 54637807 | 54639990 | 2184 | CarSat1 | red  | na |
| chrUn | 54640015 | 54640733 | 719  | CarSat1 | red  | na |
| chrUn | 54640749 | 54642042 | 1294 | CarSat1 | red  | na |
| chrUn | 54642416 | 54645854 | 3439 | CarSat1 | red  | na |
| chrUn | 54645870 | 54646589 | 720  | CarSat1 | red  | na |
| chrUn | 54646605 | 54652483 | 5879 | CarSat1 | red  | na |
| chrUn | 54652499 | 54653219 | 721  | CarSat1 | red  | na |
| chrUn | 54653235 | 54653957 | 723  | CarSat1 | red  | na |
| chrUn | 54653973 | 54654693 | 721  | CarSat1 | red  | na |
| chrUn | 54654709 | 54655248 | 540  | CarSat1 | red  | na |
| chrUn | 54687829 | 54688314 | 486  | CarSat1 | red  | na |
| chrUn | 54688344 | 54690740 | 2397 | CarSat1 | red  | na |
| chrUn | 54690773 | 54691487 | 715  | CarSat1 | red  | na |
| chrUn | 54691511 | 54692009 | 499  | CarSat1 | red  | na |
| chrUn | 54692026 | 54693275 | 1250 | CarSat1 | red  | na |
| chrUn | 54693458 | 54695625 | 2168 | CarSat1 | red  | na |
| chrUn | 54695647 | 54697586 | 1940 | CarSat1 | red  | na |
| chrUn | 54697610 | 54702992 | 5383 | CarSat1 | red  | na |
| chrUn | 54703014 | 54704596 | 1583 | CarSat1 | red  | na |
| chrUn | 54707038 | 54708411 | 1374 | CarSat1 | red  | na |
| chrUn | 54708426 | 54710831 | 2406 | CarSat1 | red  | na |
| chrUn | 54710855 | 54713287 | 2433 | CarSat1 | red  | na |

|       |          |          |      |         |        |    |
|-------|----------|----------|------|---------|--------|----|
| chrUn | 54713306 | 54714285 | 980  | CarSat1 | red    | na |
| chrUn | 54714315 | 54715293 | 979  | CarSat1 | red    | na |
| chrUn | 54716293 | 54718478 | 2186 | SAT1_CF | blue   | na |
| chrUn | 54718496 | 54719016 | 521  | SAT1_CF | blue   | na |
| chrUn | 54719033 | 54719406 | 374  | SAT1_CF | blue   | na |
| chrUn | 54719449 | 54719992 | 544  | SAT1_CF | blue   | na |
| chrUn | 54720073 | 54721862 | 1790 | SAT1_CF | blue   | na |
| chrUn | 54721874 | 54722430 | 557  | SAT1_CF | blue   | na |
| chrUn | 54722451 | 54723389 | 939  | SAT1_CF | blue   | na |
| chrUn | 54723401 | 54723864 | 464  | SAT1_CF | blue   | na |
| chrUn | 54723934 | 54724479 | 546  | SAT1_CF | blue   | na |
| chrUn | 54724501 | 54724606 | 106  | SAT1_CF | blue   | na |
| chrUn | 54724620 | 54725122 | 503  | SAT1_CF | blue   | na |
| chrUn | 54725207 | 54726480 | 1274 | SAT1_CF | blue   | na |
| chrUn | 54726493 | 54727048 | 556  | SAT1_CF | blue   | na |
| chrUn | 54727069 | 54727171 | 103  | SAT1_CF | blue   | na |
| chrUn | 54727189 | 54727686 | 498  | SAT1_CF | blue   | na |
| chrUn | 54727773 | 54729000 | 1228 | SAT1_CF | blue   | na |
| chrUn | 54729038 | 54729581 | 544  | SAT1_CF | blue   | na |
| chrUn | 54729623 | 54730186 | 564  | SAT1_CF | blue   | na |
| chrUn | 54730303 | 54732175 | 1873 | SAT1_CF | blue   | na |
| chrUn | 54732202 | 54732722 | 521  | SAT1_CF | blue   | na |
| chrUn | 54732739 | 54732924 | 186  | SAT1_CF | blue   | na |
| chrUn | 54733104 | 54733269 | 166  | SAT1_CF | blue   | na |
| chrUn | 54733311 | 54733858 | 548  | SAT1_CF | blue   | na |
| chrUn | 54733902 | 54734709 | 808  | SAT1_CF | blue   | na |
| chrUn | 54734721 | 54734857 | 137  | SAT1_CF | blue   | na |
| chrUn | 54734868 | 54735880 | 1013 | SAT1_CF | blue   | na |
| chrUn | 54735924 | 54736597 | 674  | SAT1_CF | blue   | na |
| chrUn | 54736609 | 54737292 | 684  | SAT1_CF | blue   | na |
| chrUn | 54737306 | 54737806 | 501  | SAT1_CF | blue   | na |
| chrUn | 54737846 | 54739122 | 1277 | SAT1_CF | blue   | na |
| chrUn | 54739161 | 54739704 | 544  | SAT1_CF | blue   | na |
| chrUn | 54739746 | 54740606 | 861  | SAT1_CF | blue   | na |
| chrUn | 54740620 | 54741382 | 763  | SAT1_CF | blue   | na |
| chrUn | 54742794 | 54743927 | 1134 | Sat2CF  | purple | na |
| chrUn | 54759711 | 54760296 | 586  | Sat2CF  | purple | na |
| chrUn | 54779643 | 54780979 | 1337 | CarSat1 | red    | na |
| chrUn | 54781006 | 54781711 | 706  | CarSat1 | red    | na |
| chrUn | 54781736 | 54782453 | 718  | CarSat1 | red    | na |
| chrUn | 54782480 | 54785651 | 3172 | CarSat1 | red    | na |
| chrUn | 54785676 | 54786602 | 927  | CarSat1 | red    | na |

|       |          |          |      |         |        |    |
|-------|----------|----------|------|---------|--------|----|
| chrUn | 54786630 | 54789509 | 2880 | CarSat1 | red    | na |
| chrUn | 54789852 | 54793011 | 3160 | CarSat1 | red    | na |
| chrUn | 54793045 | 54793747 | 703  | CarSat1 | red    | na |
| chrUn | 54793772 | 54794697 | 926  | CarSat1 | red    | na |
| chrUn | 54794735 | 54798413 | 3679 | CarSat1 | red    | na |
| chrUn | 54798450 | 54799393 | 944  | CarSat1 | red    | na |
| chrUn | 54799418 | 54800624 | 1207 | CarSat1 | red    | na |
| chrUn | 54800645 | 54804886 | 4242 | CarSat1 | red    | na |
| chrUn | 54832566 | 54833504 | 939  | CarSat1 | red    | na |
| chrUn | 54833531 | 54834494 | 964  | CarSat1 | red    | na |
| chrUn | 54834519 | 54835230 | 712  | CarSat1 | red    | na |
| chrUn | 54835246 | 54837199 | 1954 | CarSat1 | red    | na |
| chrUn | 54837215 | 54837684 | 470  | CarSat1 | red    | na |
| chrUn | 54837711 | 54838422 | 712  | CarSat1 | red    | na |
| chrUn | 54838449 | 54839897 | 1449 | CarSat1 | red    | na |
| chrUn | 54839924 | 54840634 | 711  | CarSat1 | red    | na |
| chrUn | 54840661 | 54841624 | 964  | CarSat1 | red    | na |
| chrUn | 54841649 | 54842276 | 628  | CarSat1 | red    | na |
| chrUn | 54842728 | 54844820 | 2093 | CarSat1 | red    | na |
| chrUn | 54844835 | 54844962 | 128  | Carsat2 | orange | na |
| chrUn | 54844850 | 54846081 | 1232 | CarSat1 | red    | na |
| chrUn | 54846097 | 54846566 | 470  | CarSat1 | red    | na |
| chrUn | 54846593 | 54849755 | 3163 | CarSat1 | red    | na |
| chrUn | 54849780 | 54850500 | 721  | CarSat1 | red    | na |
| chrUn | 54850525 | 54851452 | 928  | CarSat1 | red    | na |
| chrUn | 54851482 | 54851968 | 487  | CarSat1 | red    | na |
| chrUn | 54852001 | 54852787 | 787  | CarSat1 | red    | na |
| chrUn | 54852968 | 54853122 | 155  | CarSat1 | red    | na |
| chrUn | 54853152 | 54854598 | 1447 | CarSat1 | red    | na |
| chrUn | 54854613 | 54854740 | 128  | Carsat2 | orange | na |
| chrUn | 54854628 | 54856585 | 1958 | CarSat1 | red    | na |
| chrUn | 54856618 | 54857323 | 706  | CarSat1 | red    | na |
| chrUn | 54884157 | 54885800 | 1644 | CarSat1 | red    | na |
| chrUn | 54886879 | 54889366 | 2488 | CarSat1 | red    | na |
| chrUn | 54890631 | 54891311 | 681  | CarSat1 | red    | na |
| chrUn | 54891341 | 54892798 | 1458 | CarSat1 | red    | na |
| chrUn | 54892813 | 54894752 | 1940 | CarSat1 | red    | na |
| chrUn | 54894777 | 54895891 | 1115 | CarSat1 | red    | na |
| chrUn | 54895924 | 54896770 | 847  | CarSat1 | red    | na |
| chrUn | 54901073 | 54902092 | 1020 | CarSat1 | red    | na |
| chrUn | 54904087 | 54906409 | 2323 | CarSat1 | red    | na |
| chrUn | 54907396 | 54908395 | 1000 | CarSat1 | red    | na |

|       |          |          |      |         |        |    |
|-------|----------|----------|------|---------|--------|----|
| chrUn | 54908428 | 54909389 | 962  | CarSat1 | red    | na |
| chrUn | 54909410 | 54910045 | 636  | CarSat1 | red    | na |
| chrUn | 54911294 | 54912175 | 882  | CarSat1 | red    | na |
| chrUn | 54912196 | 54912796 | 601  | CarSat1 | red    | na |
| chrUn | 54914959 | 54916936 | 1978 | CarSat1 | red    | na |
| chrUn | 54916951 | 54917396 | 446  | CarSat1 | red    | na |
| chrUn | 54917417 | 54919132 | 1716 | CarSat1 | red    | na |
| chrUn | 54919928 | 54920512 | 585  | CarSat1 | red    | na |
| chrUn | 54920542 | 54922388 | 1847 | CarSat1 | red    | na |
| chrUn | 54930461 | 54930623 | 163  | Sat2CF  | purple | na |
| chrUn | 54930487 | 54931337 | 851  | Sat2CF  | purple | na |
| chrUn | 54930736 | 54931408 | 673  | Sat2CF  | purple | na |
| chrUn | 54951690 | 54952686 | 997  | SAT1_CF | blue   | na |
| chrUn | 54952738 | 54953264 | 527  | SAT1_CF | blue   | na |
| chrUn | 54953302 | 54954573 | 1272 | SAT1_CF | blue   | na |
| chrUn | 54954594 | 54955742 | 1149 | SAT1_CF | blue   | na |
| chrUn | 54955763 | 54956305 | 543  | SAT1_CF | blue   | na |
| chrUn | 54956347 | 54957612 | 1266 | SAT1_CF | blue   | na |
| chrUn | 54957638 | 54958123 | 486  | SAT1_CF | blue   | na |
| chrUn | 54958150 | 54958897 | 748  | SAT1_CF | blue   | na |
| chrUn | 54958909 | 54959763 | 855  | SAT1_CF | blue   | na |
| chrUn | 54959848 | 54960392 | 545  | SAT1_CF | blue   | na |
| chrUn | 54960429 | 54961627 | 1199 | SAT1_CF | blue   | na |
| chrUn | 54961727 | 54962298 | 572  | SAT1_CF | blue   | na |
| chrUn | 54962325 | 54963342 | 1018 | SAT1_CF | blue   | na |
| chrUn | 54963363 | 54963857 | 495  | SAT1_CF | blue   | na |
| chrUn | 54963869 | 54964545 | 677  | SAT1_CF | blue   | na |
| chrUn | 54964606 | 54966242 | 1637 | SAT1_CF | blue   | na |
| chrUn | 54966359 | 54967520 | 1162 | SAT1_CF | blue   | na |
| chrUn | 54967532 | 54968216 | 685  | SAT1_CF | blue   | na |
| chrUn | 54968229 | 54969068 | 840  | SAT1_CF | blue   | na |
| chrUn | 54969081 | 54970869 | 1789 | SAT1_CF | blue   | na |
| chrUn | 54970902 | 54971233 | 332  | SAT1_CF | blue   | na |
| chrUn | 54971320 | 54972436 | 1117 | SAT1_CF | blue   | na |
| chrUn | 54972526 | 54974479 | 1954 | SAT1_CF | blue   | na |
| chrUn | 54974491 | 54975848 | 1358 | SAT1_CF | blue   | na |
| chrUn | 54975891 | 54976369 | 479  | SAT1_CF | blue   | na |
| chrUn | 55108109 | 55108365 | 257  | Sat15CF | na     | na |
| chrUn | 55108109 | 55108280 | 172  | Sat15CF | na     | na |
| chrUn | 55108109 | 55108365 | 257  | Sat15CF | na     | na |
| chrUn | 55108505 | 55108833 | 329  | Sat15CF | na     | na |
| chrUn | 55130462 | 55130639 | 178  | Sat2CF  | purple | na |

|       |          |          |              |        |    |
|-------|----------|----------|--------------|--------|----|
| chrUn | 55130531 | 55131700 | 1170 Sat2CF  | purple | na |
| chrUn | 55132099 | 55132535 | 437 CarSat1  | red    | na |
| chrUn | 55132713 | 55132835 | 123 CarSat1  | red    | na |
| chrUn | 55132856 | 55133712 | 857 CarSat1  | red    | na |
| chrUn | 55133733 | 55135276 | 1544 CarSat1 | red    | na |
| chrUn | 55135472 | 55138082 | 2611 CarSat1 | red    | na |
| chrUn | 55138087 | 55139087 | 1001 SAT1_CF | blue   | na |
| chrUn | 55139119 | 55140161 | 1043 SAT1_CF | blue   | na |
| chrUn | 55140215 | 55141281 | 1067 SAT1_CF | blue   | na |
| chrUn | 55141296 | 55142119 | 824 SAT1_CF  | blue   | na |
| chrUn | 55142139 | 55143382 | 1244 SAT1_CF | blue   | na |
| chrUn | 55143407 | 55145254 | 1848 SAT1_CF | blue   | na |
| chrUn | 55146302 | 55148863 | 2562 CarSat1 | red    | na |
| chrUn | 55148897 | 55150798 | 1902 CarSat1 | red    | na |
| chrUn | 55150832 | 55151805 | 974 CarSat1  | red    | na |
| chrUn | 55151838 | 55152542 | 705 CarSat1  | red    | na |
| chrUn | 55152566 | 55155710 | 3145 CarSat1 | red    | na |
| chrUn | 55155740 | 55156448 | 709 CarSat1  | red    | na |
| chrUn | 55156478 | 55158657 | 2180 CarSat1 | red    | na |
| chrUn | 55158687 | 55160128 | 1442 CarSat1 | red    | na |
| chrUn | 55160158 | 55163080 | 2923 CarSat1 | red    | na |
| chrUn | 55163110 | 55166026 | 2917 CarSat1 | red    | na |
| chrUn | 55166056 | 55167500 | 1445 CarSat1 | red    | na |
| chrUn | 55167530 | 55168236 | 707 CarSat1  | red    | na |
| chrUn | 55168266 | 55169702 | 1437 CarSat1 | red    | na |
| chrUn | 55169717 | 55169843 | 127 Carsat2  | orange | na |
| chrUn | 55169732 | 55170622 | 891 CarSat1  | red    | na |
| chrUn | 55199985 | 55200178 | 194 Sat10CF  | na     | na |
| chrUn | 55200099 | 55200181 | 83 Sat10CF   | na     | na |
| chrUn | 55226159 | 55226343 | 185 Sat2CF   | purple | na |
| chrUn | 55226184 | 55226354 | 171 Sat2CF   | purple | na |
| chrUn | 55339762 | 55340327 | 566 Sat2CF   | purple | na |
| chrUn | 55340203 | 55340347 | 145 Sat2CF   | purple | na |
| chrUn | 55388731 | 55389843 | 1113 Sat2CF  | purple | na |
| chrUn | 55408354 | 55408605 | 252 Sat2CF   | purple | na |
| chrUn | 55408379 | 55408634 | 256 Sat2CF   | purple | na |
| chrUn | 55408478 | 55408655 | 178 Sat2CF   | purple | na |
| chrUn | 55415015 | 55415425 | 411 CarSat1  | red    | na |
| chrUn | 55415457 | 55416181 | 725 CarSat1  | red    | na |
| chrUn | 55416224 | 55417054 | 831 SAT1_CF  | blue   | na |
| chrUn | 55417107 | 55418298 | 1192 SAT1_CF | blue   | na |
| chrUn | 55418335 | 55420053 | 1719 SAT1_CF | blue   | na |

|       |          |          |      |         |        |    |
|-------|----------|----------|------|---------|--------|----|
| chrUn | 55420072 | 55423201 | 3130 | SAT1_CF | blue   | na |
| chrUn | 55423249 | 55425012 | 1764 | SAT1_CF | blue   | na |
| chrUn | 55425027 | 55426218 | 1192 | CarSat1 | red    | na |
| chrUn | 55426232 | 55426872 | 641  | CarSat1 | red    | na |
| chrUn | 55427029 | 55427879 | 851  | CarSat1 | red    | na |
| chrUn | 55427900 | 55428754 | 855  | CarSat1 | red    | na |
| chrUn | 55428774 | 55429626 | 853  | CarSat1 | red    | na |
| chrUn | 55429647 | 55430495 | 849  | CarSat1 | red    | na |
| chrUn | 55430522 | 55431206 | 685  | CarSat1 | red    | na |
| chrUn | 55431456 | 55432228 | 773  | CarSat1 | red    | na |
| chrUn | 55432328 | 55432964 | 637  | CarSat1 | red    | na |
| chrUn | 55433202 | 55434078 | 877  | CarSat1 | red    | na |
| chrUn | 55470290 | 55471127 | 838  | CarSat1 | red    | na |
| chrUn | 55471142 | 55473283 | 2142 | CarSat1 | red    | na |
| chrUn | 55473471 | 55473532 | 62   | CarSat1 | red    | na |
| chrUn | 55473562 | 55475175 | 1614 | CarSat1 | red    | na |
| chrUn | 55475318 | 55475970 | 653  | CarSat1 | red    | na |
| chrUn | 55476000 | 55478351 | 2352 | CarSat1 | red    | na |
| chrUn | 55478558 | 55479888 | 1331 | CarSat1 | red    | na |
| chrUn | 55479905 | 55480612 | 708  | CarSat1 | red    | na |
| chrUn | 55480642 | 55483583 | 2942 | CarSat1 | red    | na |
| chrUn | 55483598 | 55484816 | 1219 | CarSat1 | red    | na |
| chrUn | 55486539 | 55488117 | 1579 | CarSat1 | red    | na |
| chrUn | 55488147 | 55489611 | 1465 | CarSat1 | red    | na |
| chrUn | 55489626 | 55491093 | 1468 | CarSat1 | red    | na |
| chrUn | 55491123 | 55492061 | 939  | CarSat1 | red    | na |
| chrUn | 55492085 | 55493535 | 1451 | CarSat1 | red    | na |
| chrUn | 55493559 | 55494045 | 487  | CarSat1 | red    | na |
| chrUn | 55494075 | 55495807 | 1733 | CarSat1 | red    | na |
| chrUn | 55496863 | 55498537 | 1675 | CarSat1 | red    | na |
| chrUn | 55498567 | 55500749 | 2183 | CarSat1 | red    | na |
| chrUn | 55500779 | 55501487 | 709  | CarSat1 | red    | na |
| chrUn | 55501517 | 55502225 | 709  | CarSat1 | red    | na |
| chrUn | 55502255 | 55505438 | 3184 | CarSat1 | red    | na |
| chrUn | 55505463 | 55506175 | 713  | CarSat1 | red    | na |
| chrUn | 55506200 | 55507084 | 885  | CarSat1 | red    | na |
| chrUn | 55507287 | 55508002 | 716  | CarSat1 | red    | na |
| chrUn | 55513190 | 55514296 | 1107 | Sat2CF  | purple | na |
| chrUn | 55514499 | 55515853 | 1355 | SAT1_CF | blue   | na |
| chrUn | 55515903 | 55516305 | 403  | CarSat1 | red    | na |
| chrUn | 55516324 | 55517843 | 1520 | CarSat1 | red    | na |
| chrUn | 55517861 | 55518543 | 683  | CarSat1 | red    | na |

|       |          |          |      |         |      |    |
|-------|----------|----------|------|---------|------|----|
| chrUn | 55558997 | 55560142 | 1146 | CarSat1 | red  | na |
| chrUn | 55560167 | 55562055 | 1889 | CarSat1 | red  | na |
| chrUn | 55562250 | 55562315 | 66   | CarSat1 | red  | na |
| chrUn | 55562348 | 55564783 | 2436 | CarSat1 | red  | na |
| chrUn | 55564808 | 55566527 | 1720 | CarSat1 | red  | na |
| chrUn | 55566557 | 55567002 | 446  | CarSat1 | red  | na |
| chrUn | 55567027 | 55568958 | 1932 | CarSat1 | red  | na |
| chrUn | 55568991 | 55570951 | 1961 | CarSat1 | red  | na |
| chrUn | 55570992 | 55574357 | 3366 | CarSat1 | red  | na |
| chrUn | 55574378 | 55575585 | 1208 | CarSat1 | red  | na |
| chrUn | 55575610 | 55576562 | 953  | CarSat1 | red  | na |
| chrUn | 55576587 | 55578774 | 2188 | CarSat1 | red  | na |
| chrUn | 55578801 | 55579510 | 710  | CarSat1 | red  | na |
| chrUn | 55579537 | 55580246 | 710  | CarSat1 | red  | na |
| chrUn | 55580273 | 55580984 | 712  | CarSat1 | red  | na |
| chrUn | 55581011 | 55581721 | 711  | CarSat1 | red  | na |
| chrUn | 55581748 | 55582805 | 1058 | CarSat1 | red  | na |
| chrUn | 55583810 | 55584889 | 1080 | SAT1_CF | blue | na |
| chrUn | 55586942 | 55587692 | 751  | SAT1_CF | blue | na |
| chrUn | 55587750 | 55588717 | 968  | SAT1_CF | blue | na |
| chrUn | 55590037 | 55590762 | 726  | SAT1_CF | blue | na |
| chrUn | 55590774 | 55591270 | 497  | SAT1_CF | blue | na |
| chrUn | 55591333 | 55592981 | 1649 | SAT1_CF | blue | na |
| chrUn | 55592995 | 55593695 | 701  | SAT1_CF | blue | na |
| chrUn | 55593737 | 55594520 | 784  | SAT1_CF | blue | na |
| chrUn | 55594550 | 55596185 | 1636 | SAT1_CF | blue | na |
| chrUn | 55596375 | 55596482 | 108  | SAT1_CF | blue | na |
| chrUn | 55596525 | 55597201 | 677  | SAT1_CF | blue | na |
| chrUn | 55597213 | 55597896 | 684  | SAT1_CF | blue | na |
| chrUn | 55597909 | 55598451 | 543  | SAT1_CF | blue | na |
| chrUn | 55598495 | 55599455 | 961  | SAT1_CF | blue | na |
| chrUn | 55599503 | 55600905 | 1403 | SAT1_CF | blue | na |
| chrUn | 55602101 | 55602237 | 137  | SAT1_CF | blue | na |
| chrUn | 55602250 | 55602793 | 544  | SAT1_CF | blue | na |
| chrUn | 55602850 | 55603369 | 520  | SAT1_CF | blue | na |
| chrUn | 55603487 | 55603802 | 316  | SAT1_CF | blue | na |
| chrUn | 55605026 | 55605601 | 576  | SAT1_CF | blue | na |
| chrUn | 55605686 | 55605822 | 137  | SAT1_CF | blue | na |
| chrUn | 55605850 | 55606907 | 1058 | SAT1_CF | blue | na |
| chrUn | 55606962 | 55607550 | 589  | SAT1_CF | blue | na |
| chrUn | 55607636 | 55608936 | 1301 | SAT1_CF | blue | na |
| chrUn | 55608948 | 55609686 | 739  | SAT1_CF | blue | na |



|       |          |          |              |        |    |
|-------|----------|----------|--------------|--------|----|
| chrUn | 55609935 | 55610747 | 813 SAT1_CF  | blue   | na |
| chrUn | 55610759 | 55611441 | 683 SAT1_CF  | blue   | na |
| chrUn | 55611454 | 55611770 | 317 SAT1_CF  | blue   | na |
| chrUn | 55616081 | 55616788 | 708 SAT1_CF  | blue   | na |
| chrUn | 55616819 | 55617715 | 897 SAT1_CF  | blue   | na |
| chrUn | 55618742 | 55619259 | 518 CarSat1  | red    | na |
| chrUn | 55619286 | 55620730 | 1445 CarSat1 | red    | na |
| chrUn | 55620751 | 55622665 | 1915 CarSat1 | red    | na |
| chrUn | 55622695 | 55623674 | 980 CarSat1  | red    | na |
| chrUn | 55623701 | 55624662 | 962 CarSat1  | red    | na |
| chrUn | 55624678 | 55625398 | 721 CarSat1  | red    | na |
| chrUn | 55625414 | 55627608 | 2195 CarSat1 | red    | na |
| chrUn | 55627624 | 55629078 | 1455 CarSat1 | red    | na |
| chrUn | 55629094 | 55630301 | 1208 CarSat1 | red    | na |
| chrUn | 55630328 | 55631369 | 1042 CarSat1 | red    | na |
| chrUn | 55632252 | 55633085 | 834 CarSat1  | red    | na |
| chrUn | 55633112 | 55633541 | 430 CarSat1  | red    | na |
| chrUn | 55633581 | 55636287 | 2707 CarSat1 | red    | na |
| chrUn | 55636303 | 55637971 | 1669 CarSat1 | red    | na |
| chrUn | 55638002 | 55638713 | 712 CarSat1  | red    | na |
| chrUn | 55638728 | 55638855 | 128 Carsat2  | orange | na |
| chrUn | 55638743 | 55639967 | 1225 CarSat1 | red    | na |
| chrUn | 55639991 | 55641455 | 1465 CarSat1 | red    | na |
| chrUn | 55641471 | 55642409 | 939 CarSat1  | red    | na |
| chrUn | 55642424 | 55642551 | 128 Carsat2  | orange | na |
| chrUn | 55642440 | 55643276 | 837 CarSat1  | red    | na |
| chrUn | 55644323 | 55645120 | 798 CarSat1  | red    | na |
| chrUn | 55645136 | 55645605 | 470 CarSat1  | red    | na |
| chrUn | 55645632 | 55646594 | 963 CarSat1  | red    | na |
| chrUn | 55646610 | 55647813 | 1204 CarSat1 | red    | na |
| chrUn | 55647829 | 55650028 | 2200 CarSat1 | red    | na |
| chrUn | 55650055 | 55651095 | 1041 CarSat1 | red    | na |
| chrUn | 55652681 | 55655499 | 2819 CarSat1 | red    | na |
| chrUn | 55656021 | 55657249 | 1229 CarSat1 | red    | na |
| chrUn | 55657265 | 55658398 | 1134 CarSat1 | red    | na |
| chrUn | 55658830 | 55660055 | 1226 CarSat1 | red    | na |
| chrUn | 55660071 | 55660540 | 470 CarSat1  | red    | na |
| chrUn | 55660567 | 55661278 | 712 CarSat1  | red    | na |
| chrUn | 55661305 | 55662015 | 711 CarSat1  | red    | na |
| chrUn | 55662042 | 55663487 | 1446 CarSat1 | red    | na |
| chrUn | 55663514 | 55664223 | 710 CarSat1  | red    | na |
| chrUn | 55664250 | 55665698 | 1449 CarSat1 | red    | na |

|       |          |          |      |         |        |    |
|-------|----------|----------|------|---------|--------|----|
| chrUn | 55665725 | 55667173 | 1449 | CarSat1 | red    | na |
| chrUn | 55667200 | 55667910 | 711  | CarSat1 | red    | na |
| chrUn | 55667937 | 55669637 | 1701 | CarSat1 | red    | na |
| chrUn | 55669653 | 55670454 | 802  | CarSat1 | red    | na |
| chrUn | 55672132 | 55673382 | 1251 | Sat2CF  | purple | na |
| chrUn | 55672262 | 55673346 | 1085 | Sat2CF  | purple | na |
| chrUn | 55673222 | 55673440 | 219  | Sat2CF  | purple | na |
| chrUn | 55675853 | 55675993 | 141  | CarSat1 | red    | na |
| chrUn | 55676014 | 55677171 | 1158 | CarSat1 | red    | na |
| chrUn | 55677344 | 55677477 | 134  | CarSat1 | red    | na |
| chrUn | 55677493 | 55677793 | 301  | CarSat1 | red    | na |
| chrUn | 55677814 | 55678748 | 935  | CarSat1 | red    | na |
| chrUn | 55678937 | 55679504 | 568  | CarSat1 | red    | na |
| chrUn | 55688569 | 55688976 | 408  | CarSat1 | red    | na |
| chrUn | 55689010 | 55690782 | 1773 | CarSat1 | red    | na |
| chrUn | 55690808 | 55691210 | 403  | CarSat1 | red    | na |
| chrUn | 55691242 | 55691645 | 404  | SAT1_CF | blue   | na |
| chrUn | 55691675 | 55692604 | 930  | SAT1_CF | blue   | na |
| chrUn | 55692799 | 55692959 | 161  | Sat2CF  | purple | na |
| chrUn | 55692834 | 55693843 | 1010 | Sat2CF  | purple | na |
| chrUn | 55692920 | 55693780 | 861  | Sat2CF  | purple | na |
| chrUn | 55759090 | 55759856 | 767  | Sat2CF  | purple | na |
| chrUn | 55762193 | 55763058 | 866  | CarSat1 | red    | na |
| chrUn | 55763080 | 55764794 | 1715 | CarSat1 | red    | na |
| chrUn | 55764824 | 55766138 | 1315 | CarSat1 | red    | na |
| chrUn | 55766115 | 55766291 | 177  | Carsat2 | orange | na |
| chrUn | 55766302 | 55767231 | 930  | CarSat1 | red    | na |
| chrUn | 55767265 | 55767748 | 484  | CarSat1 | red    | na |
| chrUn | 55767778 | 55768500 | 723  | CarSat1 | red    | na |
| chrUn | 55768515 | 55769237 | 723  | CarSat1 | red    | na |
| chrUn | 55769252 | 55769974 | 723  | CarSat1 | red    | na |
| chrUn | 55769989 | 55772930 | 2942 | CarSat1 | red    | na |
| chrUn | 55772945 | 55774142 | 1198 | CarSat1 | red    | na |
| chrUn | 55774176 | 55775346 | 1171 | CarSat1 | red    | na |
| chrUn | 55775379 | 55777354 | 1976 | CarSat1 | red    | na |
| chrUn | 55777369 | 55778076 | 708  | CarSat1 | red    | na |
| chrUn | 55778106 | 55778814 | 709  | CarSat1 | red    | na |
| chrUn | 55778844 | 55779565 | 722  | CarSat1 | red    | na |
| chrUn | 55779580 | 55780301 | 722  | CarSat1 | red    | na |
| chrUn | 55780316 | 55781042 | 727  | CarSat1 | red    | na |
| chrUn | 55781057 | 55782515 | 1459 | CarSat1 | red    | na |
| chrUn | 55782530 | 55783256 | 727  | CarSat1 | red    | na |

|       |          |          |      |         |        |    |
|-------|----------|----------|------|---------|--------|----|
| chrUn | 55783271 | 55783978 | 708  | CarSat1 | red    | na |
| chrUn | 55784008 | 55784730 | 723  | CarSat1 | red    | na |
| chrUn | 55784745 | 55785756 | 1012 | CarSat1 | red    | na |
| chrUn | 55800322 | 55801310 | 989  | CarSat1 | red    | na |
| chrUn | 55801331 | 55802195 | 865  | CarSat1 | red    | na |
| chrUn | 55802345 | 55803804 | 1460 | CarSat1 | red    | na |
| chrUn | 55803964 | 55804355 | 392  | CarSat1 | red    | na |
| chrUn | 55804370 | 55808433 | 4064 | SAT1_CF | blue   | na |
| chrUn | 55808445 | 55809930 | 1486 | SAT1_CF | blue   | na |
| chrUn | 55809965 | 55810316 | 352  | SAT1_CF | blue   | na |
| chrUn | 55847547 | 55848439 | 893  | CarSat1 | red    | na |
| chrUn | 55848662 | 55850111 | 1450 | CarSat1 | red    | na |
| chrUn | 55850132 | 55850914 | 783  | CarSat1 | red    | na |
| chrUn | 55850978 | 55851885 | 908  | CarSat1 | red    | na |
| chrUn | 55851906 | 55853437 | 1532 | CarSat1 | red    | na |
| chrUn | 55853521 | 55855117 | 1597 | CarSat1 | red    | na |
| chrUn | 55855148 | 55856730 | 1583 | CarSat1 | red    | na |
| chrUn | 55856761 | 55858343 | 1583 | CarSat1 | red    | na |
| chrUn | 55863489 | 55864482 | 994  | SAT1_CF | blue   | na |
| chrUn | 55864503 | 55865041 | 539  | SAT1_CF | blue   | na |
| chrUn | 55865090 | 55866116 | 1027 | SAT1_CF | blue   | na |
| chrUn | 55866159 | 55867204 | 1046 | SAT1_CF | blue   | na |
| chrUn | 55867232 | 55867903 | 672  | SAT1_CF | blue   | na |
| chrUn | 55867946 | 55868815 | 870  | SAT1_CF | blue   | na |
| chrUn | 55878221 | 55882034 | 3814 | SAT1_CF | blue   | na |
| chrUn | 55882052 | 55883144 | 1093 | SAT1_CF | blue   | na |
| chrUn | 55883157 | 55883661 | 505  | SAT1_CF | blue   | na |
| chrUn | 55883674 | 55885784 | 2111 | SAT1_CF | blue   | na |
| chrUn | 55885835 | 55886381 | 547  | SAT1_CF | blue   | na |
| chrUn | 55886423 | 55887827 | 1405 | SAT1_CF | blue   | na |
| chrUn | 55887846 | 55888447 | 602  | SAT1_CF | blue   | na |
| chrUn | 55895555 | 55896340 | 786  | Sat2CF  | purple | na |
| chrUn | 55896019 | 55896399 | 381  | Sat2CF  | purple | na |
| chrUn | 55911540 | 55912125 | 586  | Sat2CF  | purple | na |
| chrUn | 55911569 | 55912084 | 516  | Sat2CF  | purple | na |
| chrUn | 55913849 | 55915594 | 1746 | CarSat1 | red    | na |
| chrUn | 55915610 | 55918325 | 2716 | CarSat1 | red    | na |
| chrUn | 55918341 | 55918777 | 437  | CarSat1 | red    | na |
| chrUn | 55918804 | 55919515 | 712  | CarSat1 | red    | na |
| chrUn | 55919536 | 55920981 | 1446 | CarSat1 | red    | na |
| chrUn | 55921001 | 55922456 | 1456 | CarSat1 | red    | na |
| chrUn | 55922724 | 55923883 | 1160 | CarSat1 | red    | na |

|       |          |          |      |         |        |    |
|-------|----------|----------|------|---------|--------|----|
| chrUn | 55923911 | 55924054 | 144  | CarSat1 | red    | na |
| chrUn | 55924248 | 55924958 | 711  | CarSat1 | red    | na |
| chrUn | 55933511 | 55934100 | 590  | CarSat1 | red    | na |
| chrUn | 55934301 | 55935845 | 1545 | CarSat1 | red    | na |
| chrUn | 55938247 | 55939929 | 1683 | CarSat1 | red    | na |
| chrUn | 55939956 | 55941401 | 1446 | CarSat1 | red    | na |
| chrUn | 55941428 | 55946800 | 5373 | CarSat1 | red    | na |
| chrUn | 55946824 | 55947546 | 723  | CarSat1 | red    | na |
| chrUn | 55947562 | 55948274 | 713  | CarSat1 | red    | na |
| chrUn | 55948298 | 55949012 | 715  | CarSat1 | red    | na |
| chrUn | 55949036 | 55949750 | 715  | CarSat1 | red    | na |
| chrUn | 55949774 | 55953189 | 3416 | CarSat1 | red    | na |
| chrUn | 55953216 | 55954665 | 1450 | CarSat1 | red    | na |
| chrUn | 55954691 | 55955654 | 964  | CarSat1 | red    | na |
| chrUn | 55955670 | 55956391 | 722  | CarSat1 | red    | na |
| chrUn | 55956407 | 55959331 | 2925 | CarSat1 | red    | na |
| chrUn | 55959356 | 55960563 | 1208 | CarSat1 | red    | na |
| chrUn | 55960590 | 55961728 | 1139 | CarSat1 | red    | na |
| chrUn | 55962729 | 55963339 | 611  | CarSat1 | red    | na |
| chrUn | 55963366 | 55964076 | 711  | CarSat1 | red    | na |
| chrUn | 55964103 | 55966287 | 2185 | CarSat1 | red    | na |
| chrUn | 55966314 | 55966911 | 598  | CarSat1 | red    | na |
| chrUn | 55967137 | 55967265 | 129  | Carsat2 | orange | na |
| chrUn | 55967150 | 55971453 | 4304 | CarSat1 | red    | na |
| chrUn | 55971469 | 55972182 | 714  | CarSat1 | red    | na |
| chrUn | 55972207 | 55973167 | 961  | CarSat1 | red    | na |
| chrUn | 55974059 | 55975377 | 1319 | CarSat1 | red    | na |
| chrUn | 55975631 | 55976114 | 484  | CarSat1 | red    | na |
| chrUn | 55976141 | 55976851 | 711  | CarSat1 | red    | na |
| chrUn | 55977545 | 55978324 | 780  | CarSat1 | red    | na |
| chrUn | 55978351 | 55979061 | 711  | CarSat1 | red    | na |
| chrUn | 55979092 | 55979555 | 464  | CarSat1 | red    | na |
| chrUn | 55979571 | 55980862 | 1292 | CarSat1 | red    | na |
| chrUn | 55983742 | 55984211 | 470  | CarSat1 | red    | na |
| chrUn | 55984238 | 55984947 | 710  | CarSat1 | red    | na |
| chrUn | 55984974 | 55986421 | 1448 | CarSat1 | red    | na |
| chrUn | 55986448 | 55987057 | 610  | CarSat1 | red    | na |
| chrUn | 55987252 | 55987951 | 700  | CarSat1 | red    | na |
| chrUn | 55991648 | 55992238 | 591  | CarSat1 | red    | na |
| chrUn | 55992259 | 55993045 | 787  | CarSat1 | red    | na |
| chrUn | 55993072 | 55993840 | 769  | CarSat1 | red    | na |
| chrUn | 55993870 | 55994571 | 702  | CarSat1 | red    | na |

|       |          |          |              |        |    |
|-------|----------|----------|--------------|--------|----|
| chrUn | 56016910 | 56017214 | 305 Sat7CF   | lime   | na |
| chrUn | 56017008 | 56017245 | 238 Sat7CF   | lime   | na |
| chrUn | 56016910 | 56017214 | 305 Sat7CF   | lime   | na |
| chrUn | 56017008 | 56017245 | 238 Sat7CF   | lime   | na |
| chrUn | 56053039 | 56054237 | 1199 CarSat1 | red    | na |
| chrUn | 56054264 | 56054974 | 711 CarSat1  | red    | na |
| chrUn | 56055001 | 56055711 | 711 CarSat1  | red    | na |
| chrUn | 56055738 | 56056448 | 711 CarSat1  | red    | na |
| chrUn | 56056475 | 56057923 | 1449 CarSat1 | red    | na |
| chrUn | 56057950 | 56058660 | 711 CarSat1  | red    | na |
| chrUn | 56058687 | 56060386 | 1700 CarSat1 | red    | na |
| chrUn | 56060402 | 56060866 | 465 CarSat1  | red    | na |
| chrUn | 56060897 | 56062050 | 1154 CarSat1 | red    | na |
| chrUn | 56062154 | 56064854 | 2701 CarSat1 | red    | na |
| chrUn | 56064870 | 56066324 | 1455 CarSat1 | red    | na |
| chrUn | 56066340 | 56067547 | 1208 CarSat1 | red    | na |
| chrUn | 56067574 | 56068284 | 711 CarSat1  | red    | na |
| chrUn | 56068311 | 56069021 | 711 CarSat1  | red    | na |
| chrUn | 56069048 | 56069758 | 711 CarSat1  | red    | na |
| chrUn | 56069785 | 56071486 | 1702 CarSat1 | red    | na |
| chrUn | 56071511 | 56075624 | 4114 CarSat1 | red    | na |
| chrUn | 56075640 | 56076258 | 619 CarSat1  | red    | na |
| chrUn | 56159225 | 56159970 | 746 SAT1_CF  | blue   | na |
| chrUn | 56162953 | 56163445 | 493 SAT1_CF  | blue   | na |
| chrUn | 56163469 | 56164069 | 601 SAT1_CF  | blue   | na |
| chrUn | 56164082 | 56164583 | 502 SAT1_CF  | blue   | na |
| chrUn | 56164623 | 56165025 | 403 SAT1_CF  | blue   | na |
| chrUn | 56165038 | 56166698 | 1661 SAT1_CF | blue   | na |
| chrUn | 56166741 | 56168111 | 1371 SAT1_CF | blue   | na |
| chrUn | 56168124 | 56168853 | 730 SAT1_CF  | blue   | na |
| chrUn | 56171649 | 56172419 | 771 SAT1_CF  | blue   | na |
| chrUn | 56172432 | 56172953 | 522 SAT1_CF  | blue   | na |
| chrUn | 56172979 | 56173085 | 107 SAT1_CF  | blue   | na |
| chrUn | 56178954 | 56180763 | 1810 SAT1_CF | blue   | na |
| chrUn | 56180783 | 56181257 | 475 SAT1_CF  | blue   | na |
| chrUn | 56181317 | 56181899 | 583 SAT1_CF  | blue   | na |
| chrUn | 56182626 | 56184177 | 1552 SAT1_CF | blue   | na |
| chrUn | 56184217 | 56184720 | 504 SAT1_CF  | blue   | na |
| chrUn | 56184758 | 56184815 | 58 SAT1_CF   | blue   | na |
| chrUn | 56185821 | 56186607 | 787 Sat8CF   | dgreen | na |
| chrUn | 56189092 | 56189469 | 378 Sat8CF   | dgreen | na |
| chrUn | 56197212 | 56197493 | 282 Sat8CF   | dgreen | na |

|       |          |          |              |        |    |
|-------|----------|----------|--------------|--------|----|
| chrUn | 56197279 | 56198708 | 1430 Sat8CF  | dgreen | na |
| chrUn | 56197886 | 56199038 | 1153 Sat8CF  | dgreen | na |
| chrUn | 56200912 | 56202183 | 1272 Sat8CF  | dgreen | na |
| chrUn | 56201061 | 56202489 | 1429 Sat8CF  | dgreen | na |
| chrUn | 56201667 | 56203096 | 1430 Sat8CF  | dgreen | na |
| chrUn | 56203190 | 56204624 | 1435 Sat8CF  | dgreen | na |
| chrUn | 56207549 | 56208956 | 1408 Sat8CF  | dgreen | na |
| chrUn | 56208134 | 56209564 | 1431 Sat8CF  | dgreen | na |
| chrUn | 56209658 | 56211092 | 1435 Sat8CF  | dgreen | na |
| chrUn | 56210271 | 56211229 | 959 Sat8CF   | dgreen | na |
| chrUn | 56211923 | 56212546 | 624 Sat8CF   | dgreen | na |
| chrUn | 56212584 | 56213680 | 1097 Sat8CF  | dgreen | na |
| chrUn | 56212857 | 56214287 | 1431 Sat8CF  | dgreen | na |
| chrUn | 56214381 | 56215811 | 1431 Sat8CF  | dgreen | na |
| chrUn | 56215905 | 56217339 | 1435 Sat8CF  | dgreen | na |
| chrUn | 56221690 | 56222203 | 514 Sat8CF   | dgreen | na |
| chrUn | 56223203 | 56226603 | 3401 CarSat1 | red    | na |
| chrUn | 56226627 | 56228818 | 2192 CarSat1 | red    | na |
| chrUn | 56228842 | 56231540 | 2699 CarSat1 | red    | na |
| chrUn | 56231561 | 56232522 | 962 CarSat1  | red    | na |
| chrUn | 56232546 | 56235468 | 2923 CarSat1 | red    | na |
| chrUn | 56235492 | 56236433 | 942 CarSat1  | red    | na |
| chrUn | 56236463 | 56236915 | 453 CarSat1  | red    | na |
| chrUn | 56237182 | 56240614 | 3433 CarSat1 | red    | na |
| chrUn | 56240638 | 56241349 | 712 CarSat1  | red    | na |
| chrUn | 56241373 | 56244295 | 2923 CarSat1 | red    | na |
| chrUn | 56244319 | 56245031 | 713 CarSat1  | red    | na |
| chrUn | 56245064 | 56245769 | 706 CarSat1  | red    | na |
| chrUn | 56245793 | 56246567 | 775 CarSat1  | red    | na |
| chrUn | 56284167 | 56284805 | 639 CarSat1  | red    | na |
| chrUn | 56284830 | 56286061 | 1232 CarSat1 | red    | na |
| chrUn | 56286098 | 56287534 | 1437 CarSat1 | red    | na |
| chrUn | 56287571 | 56288745 | 1175 CarSat1 | red    | na |
| chrUn | 56288766 | 56289235 | 470 CarSat1  | red    | na |
| chrUn | 56289260 | 56289963 | 704 CarSat1  | red    | na |
| chrUn | 56289997 | 56291911 | 1915 CarSat1 | red    | na |
| chrUn | 56291948 | 56293667 | 1720 CarSat1 | red    | na |
| chrUn | 56294106 | 56295092 | 987 CarSat1  | red    | na |
| chrUn | 56295336 | 56296974 | 1639 CarSat1 | red    | na |
| chrUn | 56297908 | 56298637 | 730 CarSat1  | red    | na |
| chrUn | 56298658 | 56299372 | 715 CarSat1  | red    | na |
| chrUn | 56299393 | 56300362 | 970 CarSat1  | red    | na |

|       |          |          |      |         |        |    |
|-------|----------|----------|------|---------|--------|----|
| chrUn | 56302498 | 56305021 | 2524 | CarSat1 | red    | na |
| chrUn | 56305046 | 56306011 | 966  | CarSat1 | red    | na |
| chrUn | 56306032 | 56307482 | 1451 | CarSat1 | red    | na |
| chrUn | 56307509 | 56308220 | 712  | CarSat1 | red    | na |
| chrUn | 56308247 | 56308957 | 711  | CarSat1 | red    | na |
| chrUn | 56308984 | 56310964 | 1981 | CarSat1 | red    | na |
| chrUn | 56360966 | 56362053 | 1088 | CarSat1 | red    | na |
| chrUn | 56362068 | 56362995 | 928  | CarSat1 | red    | na |
| chrUn | 56363029 | 56364256 | 1228 | CarSat1 | red    | na |
| chrUn | 56364293 | 56365221 | 929  | CarSat1 | red    | na |
| chrUn | 56365246 | 56369417 | 4172 | CarSat1 | red    | na |
| chrUn | 56369447 | 56370630 | 1184 | CarSat1 | red    | na |
| chrUn | 56370651 | 56371643 | 993  | CarSat1 | red    | na |
| chrUn | 56371658 | 56372583 | 926  | CarSat1 | red    | na |
| chrUn | 56373352 | 56374729 | 1378 | CarSat1 | red    | na |
| chrUn | 56374787 | 56376586 | 1800 | CarSat1 | red    | na |
| chrUn | 56376606 | 56378793 | 2188 | CarSat1 | red    | na |
| chrUn | 56378814 | 56380745 | 1932 | CarSat1 | red    | na |
| chrUn | 56380778 | 56381490 | 713  | CarSat1 | red    | na |
| chrUn | 56381514 | 56382218 | 705  | CarSat1 | red    | na |
| chrUn | 56382251 | 56384753 | 2503 | CarSat1 | red    | na |
| chrUn | 56436669 | 56437098 | 430  | SAT1_CF | blue   | na |
| chrUn | 56439858 | 56440152 | 295  | Sat2CF  | purple | na |
| chrUn | 56442939 | 56445348 | 2410 | SAT1_CF | blue   | na |
| chrUn | 56445359 | 56445998 | 640  | SAT1_CF | blue   | na |
| chrUn | 56446043 | 56447403 | 1361 | SAT1_CF | blue   | na |
| chrUn | 56448418 | 56449036 | 619  | SAT1_CF | blue   | na |
| chrUn | 56449116 | 56449711 | 596  | SAT1_CF | blue   | na |
| chrUn | 56449766 | 56451447 | 1682 | SAT1_CF | blue   | na |
| chrUn | 56451459 | 56451979 | 521  | SAT1_CF | blue   | na |
| chrUn | 56452026 | 56452159 | 134  | SAT1_CF | blue   | na |
| chrUn | 56452177 | 56453199 | 1023 | SAT1_CF | blue   | na |
| chrUn | 56453241 | 56453789 | 549  | SAT1_CF | blue   | na |
| chrUn | 56453833 | 56454486 | 654  | SAT1_CF | blue   | na |
| chrUn | 56454498 | 56457639 | 3142 | SAT1_CF | blue   | na |
| chrUn | 56457652 | 56458049 | 398  | SAT1_CF | blue   | na |
| chrUn | 56458095 | 56458723 | 629  | SAT1_CF | blue   | na |
| chrUn | 56458788 | 56459363 | 576  | SAT1_CF | blue   | na |
| chrUn | 56459374 | 56460098 | 725  | SAT1_CF | blue   | na |
| chrUn | 56460112 | 56460604 | 493  | SAT1_CF | blue   | na |
| chrUn | 56460615 | 56461297 | 683  | SAT1_CF | blue   | na |
| chrUn | 56461309 | 56461992 | 684  | SAT1_CF | blue   | na |

|       |          |          |              |        |    |
|-------|----------|----------|--------------|--------|----|
| chrUn | 56462005 | 56462637 | 633 SAT1_CF  | blue   | na |
| chrUn | 56462658 | 56462767 | 110 SAT1_CF  | blue   | na |
| chrUn | 56462779 | 56463280 | 502 SAT1_CF  | blue   | na |
| chrUn | 56463320 | 56464280 | 961 SAT1_CF  | blue   | na |
| chrUn | 56464358 | 56464664 | 307 SAT1_CF  | blue   | na |
| chrUn | 56464708 | 56465354 | 647 SAT1_CF  | blue   | na |
| chrUn | 56465366 | 56465910 | 545 SAT1_CF  | blue   | na |
| chrUn | 56465924 | 56467537 | 1614 SAT1_CF | blue   | na |
| chrUn | 56467580 | 56468256 | 677 SAT1_CF  | blue   | na |
| chrUn | 56468268 | 56469254 | 987 SAT1_CF  | blue   | na |
| chrUn | 56469275 | 56470233 | 959 SAT1_CF  | blue   | na |
| chrUn | 56470277 | 56470746 | 470 SAT1_CF  | blue   | na |
| chrUn | 56470762 | 56471442 | 681 SAT1_CF  | blue   | na |
| chrUn | 56510482 | 56511358 | 877 CarSat1  | red    | na |
| chrUn | 56511373 | 56511496 | 124 Carsat2  | orange | na |
| chrUn | 56511388 | 56511872 | 485 CarSat1  | red    | na |
| chrUn | 56511905 | 56513753 | 1849 CarSat1 | red    | na |
| chrUn | 56516452 | 56517210 | 759 CarSat1  | red    | na |
| chrUn | 56517235 | 56517956 | 722 CarSat1  | red    | na |
| chrUn | 56517981 | 56518689 | 709 CarSat1  | red    | na |
| chrUn | 56518714 | 56520419 | 1706 CarSat1 | red    | na |
| chrUn | 56520702 | 56522154 | 1453 CarSat1 | red    | na |
| chrUn | 56522175 | 56522621 | 447 CarSat1  | red    | na |
| chrUn | 56522651 | 56523606 | 956 CarSat1  | red    | na |
| chrUn | 56523652 | 56526311 | 2660 CarSat1 | red    | na |
| chrUn | 56526341 | 56527049 | 709 CarSat1  | red    | na |
| chrUn | 56527079 | 56527562 | 484 CarSat1  | red    | na |
| chrUn | 56528205 | 56529325 | 1121 CarSat1 | red    | na |
| chrUn | 56529355 | 56530456 | 1102 CarSat1 | red    | na |
| chrUn | 56530584 | 56531592 | 1009 CarSat1 | red    | na |
| chrUn | 56531622 | 56532657 | 1036 CarSat1 | red    | na |
| chrUn | 56533199 | 56534106 | 908 CarSat1  | red    | na |
| chrUn | 56534137 | 56535698 | 1562 CarSat1 | red    | na |
| chrUn | 56535737 | 56536994 | 1258 CarSat1 | red    | na |
| chrUn | 56537024 | 56537651 | 628 CarSat1  | red    | na |
| chrUn | 56544362 | 56545446 | 1085 Sat2CF  | purple | na |
| chrUn | 56573841 | 56574156 | 316 SAT1_CF  | blue   | na |
| chrUn | 56581679 | 56582929 | 1251 Sat2CF  | purple | na |
| chrUn | 56581809 | 56582893 | 1085 Sat2CF  | purple | na |
| chrUn | 56586239 | 56587372 | 1134 CarSat1 | red    | na |
| chrUn | 56589040 | 56590078 | 1039 CarSat1 | red    | na |
| chrUn | 56607507 | 56607782 | 276 Carsat3  | green  | na |



|       |          |          |      |         |        |    |
|-------|----------|----------|------|---------|--------|----|
| chrUn | 56623306 | 56623634 | 329  | Carsat3 | green  | na |
| chrUn | 56662305 | 56663015 | 711  | CarSat1 | red    | na |
| chrUn | 56663045 | 56663753 | 709  | CarSat1 | red    | na |
| chrUn | 56663783 | 56665226 | 1444 | CarSat1 | red    | na |
| chrUn | 56665257 | 56667435 | 2179 | CarSat1 | red    | na |
| chrUn | 56667465 | 56669632 | 2168 | CarSat1 | red    | na |
| chrUn | 56669669 | 56670154 | 486  | CarSat1 | red    | na |
| chrUn | 56670187 | 56673313 | 3127 | CarSat1 | red    | na |
| chrUn | 56673353 | 56674794 | 1442 | CarSat1 | red    | na |
| chrUn | 56674824 | 56677516 | 2693 | CarSat1 | red    | na |
| chrUn | 56677549 | 56679216 | 1668 | CarSat1 | red    | na |
| chrUn | 56679231 | 56679358 | 128  | Carsat2 | orange | na |
| chrUn | 56679246 | 56679953 | 708  | CarSat1 | red    | na |
| chrUn | 56679968 | 56680094 | 127  | Carsat2 | orange | na |
| chrUn | 56679983 | 56680689 | 707  | CarSat1 | red    | na |
| chrUn | 56680704 | 56680830 | 127  | Carsat2 | orange | na |
| chrUn | 56680719 | 56681425 | 707  | CarSat1 | red    | na |
| chrUn | 56681440 | 56681567 | 128  | Carsat2 | orange | na |
| chrUn | 56681455 | 56681941 | 487  | CarSat1 | red    | na |
| chrUn | 56681974 | 56682898 | 925  | CarSat1 | red    | na |
| chrUn | 56682928 | 56683635 | 708  | CarSat1 | red    | na |
| chrUn | 56683650 | 56683777 | 128  | Carsat2 | orange | na |
| chrUn | 56683666 | 56684321 | 656  | CarSat1 | red    | na |
| chrUn | 56684531 | 56684956 | 426  | CarSat1 | red    | na |
| chrUn | 56709631 | 56710631 | 1001 | SAT1_CF | blue   | na |
| chrUn | 56710643 | 56713564 | 2922 | SAT1_CF | blue   | na |
| chrUn | 56713609 | 56715080 | 1472 | SAT1_CF | blue   | na |
| chrUn | 56715170 | 56716995 | 1826 | SAT1_CF | blue   | na |
| chrUn | 56717037 | 56717691 | 655  | SAT1_CF | blue   | na |
| chrUn | 56717763 | 56719400 | 1638 | SAT1_CF | blue   | na |
| chrUn | 56719413 | 56720093 | 681  | SAT1_CF | blue   | na |
| chrUn | 56720105 | 56721400 | 1296 | SAT1_CF | blue   | na |
| chrUn | 56721412 | 56722635 | 1224 | SAT1_CF | blue   | na |
| chrUn | 56722648 | 56723754 | 1107 | SAT1_CF | blue   | na |
| chrUn | 56723774 | 56724607 | 834  | SAT1_CF | blue   | na |
| chrUn | 56724677 | 56725221 | 545  | SAT1_CF | blue   | na |
| chrUn | 56725266 | 56726253 | 988  | SAT1_CF | blue   | na |
| chrUn | 56726310 | 56727268 | 959  | SAT1_CF | blue   | na |
| chrUn | 56727308 | 56727808 | 501  | SAT1_CF | blue   | na |
| chrUn | 56727835 | 56728583 | 749  | SAT1_CF | blue   | na |
| chrUn | 56728601 | 56729258 | 658  | SAT1_CF | blue   | na |
| chrUn | 56729309 | 56730116 | 808  | SAT1_CF | blue   | na |

|       |          |          |              |        |    |
|-------|----------|----------|--------------|--------|----|
| chrUn | 56730148 | 56730653 | 506 SAT1_CF  | blue   | na |
| chrUn | 56730665 | 56731341 | 677 SAT1_CF  | blue   | na |
| chrUn | 56731411 | 56732266 | 856 SAT1_CF  | blue   | na |
| chrUn | 56733306 | 56735407 | 2102 CarSat1 | red    | na |
| chrUn | 56735437 | 56736145 | 709 CarSat1  | red    | na |
| chrUn | 56736175 | 56736613 | 439 CarSat1  | red    | na |
| chrUn | 56736642 | 56738582 | 1941 CarSat1 | red    | na |
| chrUn | 56738598 | 56740045 | 1448 CarSat1 | red    | na |
| chrUn | 56740070 | 56741030 | 961 CarSat1  | red    | na |
| chrUn | 56741057 | 56742035 | 979 CarSat1  | red    | na |
| chrUn | 56742065 | 56742506 | 442 CarSat1  | red    | na |
| chrUn | 56742533 | 56745458 | 2926 CarSat1 | red    | na |
| chrUn | 56745485 | 56746192 | 708 CarSat1  | red    | na |
| chrUn | 56746221 | 56747153 | 933 CarSat1  | red    | na |
| chrUn | 56747934 | 56748608 | 675 CarSat1  | red    | na |
| chrUn | 56748635 | 56749345 | 711 CarSat1  | red    | na |
| chrUn | 56749378 | 56750352 | 975 CarSat1  | red    | na |
| chrUn | 56750382 | 56750822 | 441 CarSat1  | red    | na |
| chrUn | 56750849 | 56752296 | 1448 CarSat1 | red    | na |
| chrUn | 56752323 | 56754267 | 1945 CarSat1 | red    | na |
| chrUn | 56754292 | 56755510 | 1219 CarSat1 | red    | na |
| chrUn | 56755540 | 56756649 | 1110 CarSat1 | red    | na |
| chrUn | 56762222 | 56763763 | 1542 CarSat1 | red    | na |
| chrUn | 56763790 | 56765274 | 1485 CarSat1 | red    | na |
| chrUn | 56774674 | 56775357 | 684 CarSat1  | red    | na |
| chrUn | 56775375 | 56776891 | 1517 CarSat1 | red    | na |
| chrUn | 56776910 | 56777312 | 403 CarSat1  | red    | na |
| chrUn | 56777309 | 56778644 | 1336 SAT1_CF | blue   | na |
| chrUn | 56778872 | 56779884 | 1013 Sat2CF  | purple | na |
| chrUn | 56887379 | 56888078 | 700 CarSat1  | red    | na |
| chrUn | 56888278 | 56888890 | 613 CarSat1  | red    | na |
| chrUn | 56888907 | 56890614 | 1708 CarSat1 | red    | na |
| chrUn | 56890639 | 56891352 | 714 CarSat1  | red    | na |
| chrUn | 56891377 | 56892820 | 1444 CarSat1 | red    | na |
| chrUn | 56892831 | 56893770 | 940 CarSat1  | red    | na |
| chrUn | 56893800 | 56894504 | 705 CarSat1  | red    | na |
| chrUn | 56894539 | 56895763 | 1225 CarSat1 | red    | na |
| chrUn | 56895789 | 56897721 | 1933 CarSat1 | red    | na |
| chrUn | 56897742 | 56899439 | 1698 CarSat1 | red    | na |
| chrUn | 56899464 | 56900670 | 1207 CarSat1 | red    | na |
| chrUn | 56900691 | 56901408 | 718 CarSat1  | red    | na |
| chrUn | 56901433 | 56902386 | 954 CarSat1  | red    | na |

|       |          |          |      |         |      |    |
|-------|----------|----------|------|---------|------|----|
| chrUn | 56902419 | 56904436 | 2018 | CarSat1 | red  | na |
| chrUn | 56937050 | 56937923 | 874  | SAT1_CF | blue | na |
| chrUn | 56937965 | 56938640 | 676  | SAT1_CF | blue | na |
| chrUn | 56938652 | 56939771 | 1120 | SAT1_CF | blue | na |
| chrUn | 56939837 | 56941633 | 1797 | SAT1_CF | blue | na |
| chrUn | 56941676 | 56942349 | 674  | SAT1_CF | blue | na |
| chrUn | 56942362 | 56943252 | 891  | SAT1_CF | blue | na |
| chrUn | 56943266 | 56943758 | 493  | SAT1_CF | blue | na |
| chrUn | 56943769 | 56945059 | 1291 | SAT1_CF | blue | na |
| chrUn | 56945129 | 56945462 | 334  | SAT1_CF | blue | na |
| chrUn | 56945907 | 56948391 | 2485 | SAT1_CF | blue | na |
| chrUn | 56948404 | 56948913 | 510  | SAT1_CF | blue | na |
| chrUn | 56948945 | 56949805 | 861  | SAT1_CF | blue | na |
| chrUn | 56949853 | 56950534 | 682  | SAT1_CF | blue | na |
| chrUn | 56950552 | 56951040 | 489  | SAT1_CF | blue | na |
| chrUn | 56951106 | 56951241 | 136  | SAT1_CF | blue | na |
| chrUn | 56951269 | 56951780 | 512  | SAT1_CF | blue | na |
| chrUn | 56951824 | 56952897 | 1074 | SAT1_CF | blue | na |
| chrUn | 56952940 | 56953800 | 861  | SAT1_CF | blue | na |
| chrUn | 56953812 | 56954571 | 760  | SAT1_CF | blue | na |
| chrUn | 56954584 | 56955085 | 502  | SAT1_CF | blue | na |
| chrUn | 56955172 | 56955661 | 490  | SAT1_CF | blue | na |
| chrUn | 56955701 | 56956622 | 922  | SAT1_CF | blue | na |
| chrUn | 56956653 | 56958108 | 1456 | SAT1_CF | blue | na |
| chrUn | 56958164 | 56959151 | 988  | SAT1_CF | blue | na |
| chrUn | 56959164 | 56959933 | 770  | SAT1_CF | blue | na |
| chrUn | 57027424 | 57030456 | 3033 | SAT1_CF | blue | na |
| chrUn | 57030499 | 57031040 | 542  | SAT1_CF | blue | na |
| chrUn | 57031057 | 57034592 | 3536 | SAT1_CF | blue | na |
| chrUn | 57034609 | 57034803 | 195  | SAT1_CF | blue | na |
| chrUn | 57034818 | 57035329 | 512  | SAT1_CF | blue | na |
| chrUn | 57035356 | 57036051 | 696  | SAT1_CF | blue | na |
| chrUn | 57036063 | 57036761 | 699  | SAT1_CF | blue | na |
| chrUn | 57036804 | 57038153 | 1350 | SAT1_CF | blue | na |
| chrUn | 57038146 | 57038870 | 725  | CarSat1 | red  | na |
| chrUn | 57038932 | 57039321 | 390  | CarSat1 | red  | na |
| chrUn | 57075344 | 57076308 | 965  | CarSat1 | red  | na |
| chrUn | 57076333 | 57078520 | 2188 | CarSat1 | red  | na |
| chrUn | 57078536 | 57079258 | 723  | CarSat1 | red  | na |
| chrUn | 57079283 | 57080943 | 1661 | CarSat1 | red  | na |
| chrUn | 57080973 | 57082942 | 1970 | CarSat1 | red  | na |
| chrUn | 57082958 | 57083679 | 722  | CarSat1 | red  | na |

|       |          |          |      |         |        |    |
|-------|----------|----------|------|---------|--------|----|
| chrUn | 57083704 | 57084416 | 713  | CarSat1 | red    | na |
| chrUn | 57084441 | 57085143 | 703  | CarSat1 | red    | na |
| chrUn | 57085417 | 57087148 | 1732 | CarSat1 | red    | na |
| chrUn | 57087173 | 57087892 | 720  | CarSat1 | red    | na |
| chrUn | 57087908 | 57088376 | 469  | CarSat1 | red    | na |
| chrUn | 57088403 | 57089115 | 713  | CarSat1 | red    | na |
| chrUn | 57089140 | 57089850 | 711  | CarSat1 | red    | na |
| chrUn | 57089877 | 57090839 | 963  | CarSat1 | red    | na |
| chrUn | 57090855 | 57092795 | 1941 | CarSat1 | red    | na |
| chrUn | 57092822 | 57094272 | 1451 | CarSat1 | red    | na |
| chrUn | 57094291 | 57095260 | 970  | CarSat1 | red    | na |
| chrUn | 57095285 | 57096211 | 927  | CarSat1 | red    | na |
| chrUn | 57096226 | 57096353 | 128  | Carsat2 | orange | na |
| chrUn | 57096241 | 57096949 | 709  | CarSat1 | red    | na |
| chrUn | 57096977 | 57097815 | 839  | CarSat1 | red    | na |
| chrUn | 57098831 | 57099553 | 723  | CarSat1 | red    | na |
| chrUn | 57099569 | 57100290 | 722  | CarSat1 | red    | na |
| chrUn | 57100315 | 57101763 | 1449 | CarSat1 | red    | na |
| chrUn | 57101790 | 57104484 | 2695 | CarSat1 | red    | na |
| chrUn | 57104514 | 57106926 | 2413 | CarSat1 | red    | na |
| chrUn | 57106951 | 57107908 | 958  | CarSat1 | red    | na |
| chrUn | 57107933 | 57108398 | 466  | CarSat1 | red    | na |
| chrUn | 57108422 | 57109135 | 714  | CarSat1 | red    | na |
| chrUn | 57109160 | 57110115 | 956  | CarSat1 | red    | na |
| chrUn | 57110136 | 57111588 | 1453 | CarSat1 | red    | na |
| chrUn | 57111609 | 57112328 | 720  | CarSat1 | red    | na |
| chrUn | 57112349 | 57113555 | 1207 | CarSat1 | red    | na |
| chrUn | 57113580 | 57115752 | 2173 | CarSat1 | red    | na |
| chrUn | 57115777 | 57118221 | 2445 | CarSat1 | red    | na |
| chrUn | 57118242 | 57118710 | 469  | CarSat1 | red    | na |
| chrUn | 57118735 | 57121062 | 2328 | CarSat1 | red    | na |
| chrUn | 57145287 | 57145738 | 452  | SAT1_CF | blue   | na |
| chrUn | 57145782 | 57146330 | 549  | SAT1_CF | blue   | na |
| chrUn | 57146343 | 57147004 | 662  | SAT1_CF | blue   | na |
| chrUn | 57147016 | 57148941 | 1926 | SAT1_CF | blue   | na |
| chrUn | 57148953 | 57149627 | 675  | SAT1_CF | blue   | na |
| chrUn | 57149697 | 57150173 | 477  | SAT1_CF | blue   | na |
| chrUn | 57150185 | 57150850 | 666  | SAT1_CF | blue   | na |
| chrUn | 57150893 | 57151446 | 554  | SAT1_CF | blue   | na |
| chrUn | 57151459 | 57151961 | 503  | SAT1_CF | blue   | na |
| chrUn | 57152044 | 57152784 | 741  | SAT1_CF | blue   | na |
| chrUn | 57152797 | 57153201 | 405  | SAT1_CF | blue   | na |

|       |          |          |              |      |    |
|-------|----------|----------|--------------|------|----|
| chrUn | 57153239 | 57153740 | 502 SAT1_CF  | blue | na |
| chrUn | 57153753 | 57154672 | 920 SAT1_CF  | blue | na |
| chrUn | 57154714 | 57155496 | 783 SAT1_CF  | blue | na |
| chrUn | 57155574 | 57156495 | 922 SAT1_CF  | blue | na |
| chrUn | 57156517 | 57157723 | 1207 SAT1_CF | blue | na |
| chrUn | 57157734 | 57158436 | 703 SAT1_CF  | blue | na |
| chrUn | 57158464 | 57159127 | 664 SAT1_CF  | blue | na |
| chrUn | 57159145 | 57159658 | 514 SAT1_CF  | blue | na |
| chrUn | 57159881 | 57160576 | 696 SAT1_CF  | blue | na |
| chrUn | 57160589 | 57160695 | 107 SAT1_CF  | blue | na |
| chrUn | 57160718 | 57161772 | 1055 SAT1_CF | blue | na |
| chrUn | 57161785 | 57162285 | 501 SAT1_CF  | blue | na |
| chrUn | 57162303 | 57163784 | 1482 SAT1_CF | blue | na |
| chrUn | 57163795 | 57164197 | 403 SAT1_CF  | blue | na |
| chrUn | 57164237 | 57165350 | 1114 SAT1_CF | blue | na |
| chrUn | 57165393 | 57167484 | 2092 SAT1_CF | blue | na |
| chrUn | 57168495 | 57171234 | 2740 CarSat1 | red  | na |
| chrUn | 57171257 | 57174457 | 3201 CarSat1 | red  | na |
| chrUn | 57174494 | 57176148 | 1655 CarSat1 | red  | na |
| chrUn | 57176181 | 57177135 | 955 CarSat1  | red  | na |
| chrUn | 57177162 | 57177873 | 712 CarSat1  | red  | na |
| chrUn | 57177900 | 57178609 | 710 CarSat1  | red  | na |
| chrUn | 57178636 | 57180078 | 1443 CarSat1 | red  | na |
| chrUn | 57180105 | 57180565 | 461 CarSat1  | red  | na |
| chrUn | 57180590 | 57181553 | 964 CarSat1  | red  | na |
| chrUn | 57181580 | 57182573 | 994 CarSat1  | red  | na |
| chrUn | 57182589 | 57183027 | 439 CarSat1  | red  | na |
| chrUn | 57183054 | 57183764 | 711 CarSat1  | red  | na |
| chrUn | 57183791 | 57184501 | 711 CarSat1  | red  | na |
| chrUn | 57184528 | 57185522 | 995 CarSat1  | red  | na |
| chrUn | 57185537 | 57186463 | 927 CarSat1  | red  | na |
| chrUn | 57186488 | 57187452 | 965 CarSat1  | red  | na |
| chrUn | 57187479 | 57188188 | 710 CarSat1  | red  | na |
| chrUn | 57188215 | 57189208 | 994 CarSat1  | red  | na |
| chrUn | 57189224 | 57189932 | 709 CarSat1  | red  | na |
| chrUn | 57189962 | 57190644 | 683 CarSat1  | red  | na |
| chrUn | 57218871 | 57219949 | 1079 CarSat1 | red  | na |
| chrUn | 57220124 | 57220257 | 134 CarSat1  | red  | na |
| chrUn | 57220273 | 57220567 | 295 CarSat1  | red  | na |
| chrUn | 57220594 | 57221528 | 935 CarSat1  | red  | na |
| chrUn | 57221717 | 57222284 | 568 CarSat1  | red  | na |
| chrUn | 57231589 | 57231996 | 408 CarSat1  | red  | na |

|       |          |          |      |         |        |    |
|-------|----------|----------|------|---------|--------|----|
| chrUn | 57232030 | 57233809 | 1780 | CarSat1 | red    | na |
| chrUn | 57233828 | 57234230 | 403  | CarSat1 | red    | na |
| chrUn | 57234262 | 57234664 | 403  | SAT1_CF | blue   | na |
| chrUn | 57234694 | 57235623 | 930  | SAT1_CF | blue   | na |
| chrUn | 57243462 | 57243969 | 508  | CarSat1 | red    | na |
| chrUn | 57244002 | 57245696 | 1695 | CarSat1 | red    | na |
| chrUn | 57245723 | 57246434 | 712  | CarSat1 | red    | na |
| chrUn | 57246461 | 57248914 | 2454 | CarSat1 | red    | na |
| chrUn | 57248944 | 57250384 | 1441 | CarSat1 | red    | na |
| chrUn | 57250414 | 57255537 | 5124 | CarSat1 | red    | na |
| chrUn | 57255552 | 57258473 | 2922 | CarSat1 | red    | na |
| chrUn | 57258503 | 57260679 | 2177 | CarSat1 | red    | na |
| chrUn | 57260709 | 57261417 | 709  | CarSat1 | red    | na |
| chrUn | 57261447 | 57265577 | 4131 | CarSat1 | red    | na |
| chrUn | 57314183 | 57315757 | 1575 | CarSat1 | red    | na |
| chrUn | 57316737 | 57317401 | 665  | CarSat1 | red    | na |
| chrUn | 57317431 | 57317924 | 494  | CarSat1 | red    | na |
| chrUn | 57317940 | 57318658 | 719  | CarSat1 | red    | na |
| chrUn | 57318674 | 57319310 | 637  | CarSat1 | red    | na |
| chrUn | 57319580 | 57320916 | 1337 | CarSat1 | red    | na |
| chrUn | 57320932 | 57321402 | 471  | CarSat1 | red    | na |
| chrUn | 57321423 | 57322302 | 880  | CarSat1 | red    | na |
| chrUn | 57323203 | 57324804 | 1602 | CarSat1 | red    | na |
| chrUn | 57324834 | 57325540 | 707  | CarSat1 | red    | na |
| chrUn | 57325570 | 57326502 | 933  | CarSat1 | red    | na |
| chrUn | 57326519 | 57327647 | 1129 | CarSat1 | red    | na |
| chrUn | 57327672 | 57329176 | 1505 | CarSat1 | red    | na |
| chrUn | 57329336 | 57331866 | 2531 | CarSat1 | red    | na |
| chrUn | 57331896 | 57332600 | 705  | CarSat1 | red    | na |
| chrUn | 57332612 | 57332742 | 131  | Carsat2 | orange | na |
| chrUn | 57332630 | 57333123 | 494  | CarSat1 | red    | na |
| chrUn | 57333148 | 57333858 | 711  | CarSat1 | red    | na |
| chrUn | 57333883 | 57334595 | 713  | CarSat1 | red    | na |
| chrUn | 57334611 | 57335247 | 637  | CarSat1 | red    | na |
| chrUn | 57336892 | 57338605 | 1714 | CarSat1 | red    | na |
| chrUn | 57341254 | 57342776 | 1523 | CarSat1 | red    | na |
| chrUn | 57375513 | 57376285 | 773  | Sat2CF  | purple | na |
| chrUn | 57393730 | 57394874 | 1145 | Sat2CF  | purple | na |
| chrUn | 57394207 | 57394953 | 747  | Sat2CF  | purple | na |
| chrUn | 57459489 | 57460621 | 1133 | Sat2CF  | purple | na |
| chrUn | 57460510 | 57460655 | 146  | Sat2CF  | purple | na |
| chrUn | 57513908 | 57514671 | 764  | SAT1_CF | blue   | na |

|       |          |          |      |         |      |    |
|-------|----------|----------|------|---------|------|----|
| chrUn | 57514693 | 57514797 | 105  | SAT1_CF | blue | na |
| chrUn | 57514814 | 57515362 | 549  | SAT1_CF | blue | na |
| chrUn | 57515405 | 57516398 | 994  | SAT1_CF | blue | na |
| chrUn | 57516418 | 57517429 | 1012 | SAT1_CF | blue | na |
| chrUn | 57517482 | 57517984 | 503  | SAT1_CF | blue | na |
| chrUn | 57517996 | 57518680 | 685  | SAT1_CF | blue | na |
| chrUn | 57518723 | 57519271 | 549  | SAT1_CF | blue | na |
| chrUn | 57519282 | 57519469 | 188  | SAT1_CF | blue | na |
| chrUn | 57519499 | 57520589 | 1091 | SAT1_CF | blue | na |
| chrUn | 57520632 | 57521171 | 540  | SAT1_CF | blue | na |
| chrUn | 57521250 | 57522038 | 789  | SAT1_CF | blue | na |
| chrUn | 57522082 | 57522629 | 548  | SAT1_CF | blue | na |
| chrUn | 57522640 | 57523039 | 400  | SAT1_CF | blue | na |
| chrUn | 57523082 | 57523583 | 502  | SAT1_CF | blue | na |
| chrUn | 57523610 | 57524200 | 591  | SAT1_CF | blue | na |
| chrUn | 57524212 | 57524321 | 110  | SAT1_CF | blue | na |
| chrUn | 57524341 | 57524850 | 510  | SAT1_CF | blue | na |
| chrUn | 57524887 | 57525400 | 514  | SAT1_CF | blue | na |
| chrUn | 57525487 | 57525988 | 502  | SAT1_CF | blue | na |
| chrUn | 57526001 | 57527548 | 1548 | SAT1_CF | blue | na |
| chrUn | 57527590 | 57529446 | 1857 | SAT1_CF | blue | na |
| chrUn | 57529486 | 57529987 | 502  | SAT1_CF | blue | na |
| chrUn | 57530000 | 57530684 | 685  | SAT1_CF | blue | na |
| chrUn | 57530707 | 57531372 | 666  | SAT1_CF | blue | na |
| chrUn | 57531415 | 57532045 | 631  | SAT1_CF | blue | na |
| chrUn | 57532072 | 57532626 | 555  | SAT1_CF | blue | na |
| chrUn | 57533707 | 57535057 | 1351 | SAT1_CF | blue | na |
| chrUn | 57535125 | 57535638 | 514  | SAT1_CF | blue | na |
| chrUn | 57535723 | 57536038 | 316  | SAT1_CF | blue | na |
| chrUn | 57536640 | 57536969 | 330  | SAT1_CF | blue | na |
| chrUn | 57537049 | 57537556 | 508  | SAT1_CF | blue | na |
| chrUn | 57537569 | 57537971 | 403  | SAT1_CF | blue | na |
| chrUn | 57538011 | 57538513 | 503  | SAT1_CF | blue | na |
| chrUn | 57538526 | 57539260 | 735  | SAT1_CF | blue | na |
| chrUn | 57540571 | 57540737 | 167  | SAT1_CF | blue | na |
| chrUn | 57540781 | 57541737 | 957  | SAT1_CF | blue | na |
| chrUn | 57541751 | 57542295 | 545  | SAT1_CF | blue | na |
| chrUn | 57545687 | 57545991 | 305  | SAT1_CF | blue | na |
| chrUn | 57546005 | 57546110 | 106  | SAT1_CF | blue | na |
| chrUn | 57546132 | 57546676 | 545  | SAT1_CF | blue | na |
| chrUn | 57548647 | 57550252 | 1606 | SAT1_CF | blue | na |
| chrUn | 57550280 | 57551391 | 1112 | SAT1_CF | blue | na |

|       |          |          |              |        |    |
|-------|----------|----------|--------------|--------|----|
| chrUn | 57557519 | 57557789 | 271 SAT1_CF  | blue   | na |
| chrUn | 57557833 | 57558382 | 550 SAT1_CF  | blue   | na |
| chrUn | 57558425 | 57558962 | 538 SAT1_CF  | blue   | na |
| chrUn | 57560009 | 57560473 | 465 SAT1_CF  | blue   | na |
| chrUn | 57560486 | 57560562 | 77 SAT1_CF   | blue   | na |
| chrUn | 57560615 | 57561143 | 529 SAT1_CF  | blue   | na |
| chrUn | 57561155 | 57561622 | 468 SAT1_CF  | blue   | na |
| chrUn | 57568187 | 57568986 | 800 SAT1_CF  | blue   | na |
| chrUn | 57569020 | 57569421 | 402 SAT1_CF  | blue   | na |
| chrUn | 57569463 | 57569963 | 501 SAT1_CF  | blue   | na |
| chrUn | 57569976 | 57570659 | 684 SAT1_CF  | blue   | na |
| chrUn | 57570671 | 57571354 | 684 SAT1_CF  | blue   | na |
| chrUn | 57571366 | 57571816 | 451 SAT1_CF  | blue   | na |
| chrUn | 57573852 | 57574752 | 901 SAT1_CF  | blue   | na |
| chrUn | 57574764 | 57576170 | 1407 SAT1_CF | blue   | na |
| chrUn | 57576397 | 57576478 | 82 SAT1_CF   | blue   | na |
| chrUn | 57576517 | 57577792 | 1276 SAT1_CF | blue   | na |
| chrUn | 57577820 | 57578383 | 564 SAT1_CF  | blue   | na |
| chrUn | 57579433 | 57580290 | 858 CarSat1  | red    | na |
| chrUn | 57580320 | 57584709 | 4390 CarSat1 | red    | na |
| chrUn | 57584724 | 57584851 | 128 Carsat2  | orange | na |
| chrUn | 57584739 | 57587654 | 2916 CarSat1 | red    | na |
| chrUn | 57587669 | 57587795 | 127 Carsat2  | orange | na |
| chrUn | 57587684 | 57588395 | 712 CarSat1  | red    | na |
| chrUn | 57588425 | 57588909 | 485 CarSat1  | red    | na |
| chrUn | 57588942 | 57589867 | 926 CarSat1  | red    | na |
| chrUn | 57589882 | 57590008 | 127 Carsat2  | orange | na |
| chrUn | 57589897 | 57590604 | 708 CarSat1  | red    | na |
| chrUn | 57590619 | 57590745 | 127 Carsat2  | orange | na |
| chrUn | 57590634 | 57591339 | 706 CarSat1  | red    | na |
| chrUn | 57591354 | 57591479 | 126 Carsat2  | orange | na |
| chrUn | 57591369 | 57596491 | 5123 CarSat1 | red    | na |
| chrUn | 57596521 | 57597971 | 1451 CarSat1 | red    | na |
| chrUn | 57598003 | 57598707 | 705 CarSat1  | red    | na |
| chrUn | 57598737 | 57599445 | 709 CarSat1  | red    | na |
| chrUn | 57599460 | 57599586 | 127 Carsat2  | orange | na |
| chrUn | 57599475 | 57601120 | 1646 CarSat1 | red    | na |
| chrUn | 57632096 | 57632339 | 244 Sat7CF   | lime   | na |
| chrUn | 57632135 | 57632488 | 354 Sat7CF   | lime   | na |
| chrUn | 57647427 | 57648622 | 1196 CarSat1 | red    | na |
| chrUn | 57648649 | 57650094 | 1446 CarSat1 | red    | na |
| chrUn | 57650121 | 57650830 | 710 CarSat1  | red    | na |



|       |          |          |      |         |     |    |
|-------|----------|----------|------|---------|-----|----|
| chrUn | 57650857 | 57652312 | 1456 | CarSat1 | red | na |
| chrUn | 57652328 | 57653049 | 722  | CarSat1 | red | na |
| chrUn | 57653065 | 57653534 | 470  | CarSat1 | red | na |
| chrUn | 57653561 | 57655252 | 1692 | CarSat1 | red | na |
| chrUn | 57655277 | 57656231 | 955  | CarSat1 | red | na |
| chrUn | 57656653 | 57657235 | 583  | CarSat1 | red | na |
| chrUn | 57657262 | 57658041 | 780  | CarSat1 | red | na |
| chrUn | 57659007 | 57659685 | 679  | CarSat1 | red | na |
| chrUn | 57659710 | 57660179 | 470  | CarSat1 | red | na |
| chrUn | 57660206 | 57663593 | 3388 | CarSat1 | red | na |
| chrUn | 57663623 | 57664602 | 980  | CarSat1 | red | na |
| chrUn | 57664629 | 57665338 | 710  | CarSat1 | red | na |
| chrUn | 57665365 | 57666782 | 1418 | CarSat1 | red | na |
| chrUn | 57666798 | 57669208 | 2411 | CarSat1 | red | na |
| chrUn | 57669238 | 57669945 | 708  | CarSat1 | red | na |
| chrUn | 57669975 | 57670575 | 601  | CarSat1 | red | na |
| chrUn | 57671613 | 57672188 | 576  | CarSat1 | red | na |
| chrUn | 57672218 | 57672702 | 485  | CarSat1 | red | na |
| chrUn | 57672726 | 57673661 | 936  | CarSat1 | red | na |
| chrUn | 57673691 | 57675131 | 1441 | CarSat1 | red | na |
| chrUn | 57675161 | 57675873 | 713  | CarSat1 | red | na |
| chrUn | 57675903 | 57676389 | 487  | CarSat1 | red | na |
| chrUn | 57676413 | 57677775 | 1363 | CarSat1 | red | na |
| chrUn | 57677859 | 57680711 | 2853 | CarSat1 | red | na |
| chrUn | 57680728 | 57681448 | 721  | CarSat1 | red | na |
| chrUn | 57681473 | 57682567 | 1095 | CarSat1 | red | na |
| chrUn | 57682592 | 57683768 | 1177 | CarSat1 | red | na |
| chrUn | 57683797 | 57684286 | 490  | CarSat1 | red | na |
| chrUn | 57684303 | 57686605 | 2303 | CarSat1 | red | na |
| chrUn | 57686635 | 57688597 | 1963 | CarSat1 | red | na |
| chrUn | 57688614 | 57689330 | 717  | CarSat1 | red | na |
| chrUn | 57689346 | 57690067 | 722  | CarSat1 | red | na |
| chrUn | 57690092 | 57691432 | 1341 | CarSat1 | red | na |
| chrUn | 57691449 | 57692169 | 721  | CarSat1 | red | na |
| chrUn | 57692194 | 57693150 | 957  | CarSat1 | red | na |
| chrUn | 57694163 | 57694712 | 550  | CarSat1 | red | na |
| chrUn | 57694742 | 57696702 | 1961 | CarSat1 | red | na |
| chrUn | 57696726 | 57697661 | 936  | CarSat1 | red | na |
| chrUn | 57697691 | 57698399 | 709  | CarSat1 | red | na |
| chrUn | 57698429 | 57699874 | 1446 | CarSat1 | red | na |
| chrUn | 57699904 | 57700529 | 626  | CarSat1 | red | na |
| chrUn | 57702447 | 57704926 | 2480 | CarSat1 | red | na |

|       |          |          |       |         |        |    |
|-------|----------|----------|-------|---------|--------|----|
| chrUn | 57704956 | 57705442 | 487   | CarSat1 | red    | na |
| chrUn | 57705475 | 57707138 | 1664  | CarSat1 | red    | na |
| chrUn | 57707168 | 57707875 | 708   | CarSat1 | red    | na |
| chrUn | 57707905 | 57708613 | 709   | CarSat1 | red    | na |
| chrUn | 57708643 | 57709351 | 709   | CarSat1 | red    | na |
| chrUn | 57709366 | 57709492 | 127   | Carsat2 | orange | na |
| chrUn | 57709381 | 57710092 | 712   | CarSat1 | red    | na |
| chrUn | 57710122 | 57711566 | 1445  | CarSat1 | red    | na |
| chrUn | 57711596 | 57712817 | 1222  | CarSat1 | red    | na |
| chrUn | 57712841 | 57713559 | 719   | CarSat1 | red    | na |
| chrUn | 57713592 | 57715996 | 2405  | CarSat1 | red    | na |
| chrUn | 57716026 | 57716733 | 708   | CarSat1 | red    | na |
| chrUn | 57716763 | 57717506 | 744   | CarSat1 | red    | na |
| chrUn | 57718507 | 57719182 | 676   | CarSat1 | red    | na |
| chrUn | 57719206 | 57730451 | 11246 | CarSat1 | red    | na |
| chrUn | 57730466 | 57730592 | 127   | Carsat2 | orange | na |
| chrUn | 57730481 | 57730966 | 486   | CarSat1 | red    | na |
| chrUn | 57730990 | 57733181 | 2192  | CarSat1 | red    | na |
| chrUn | 57733205 | 57735145 | 1941  | CarSat1 | red    | na |
| chrUn | 57735172 | 57736131 | 960   | CarSat1 | red    | na |
| chrUn | 57736147 | 57737083 | 937   | CarSat1 | red    | na |
| chrUn | 57737113 | 57739299 | 2187  | CarSat1 | red    | na |
| chrUn | 57739314 | 57739440 | 127   | Carsat2 | orange | na |
| chrUn | 57739329 | 57739958 | 630   | CarSat1 | red    | na |
| chrUn | 57770225 | 57771145 | 921   | CarSat1 | red    | na |
| chrUn | 57771160 | 57771866 | 707   | CarSat1 | red    | na |
| chrUn | 57771896 | 57772618 | 723   | CarSat1 | red    | na |
| chrUn | 57772633 | 57774816 | 2184  | CarSat1 | red    | na |
| chrUn | 57774846 | 57776706 | 1861  | CarSat1 | red    | na |
| chrUn | 57776736 | 57779660 | 2925  | CarSat1 | red    | na |
| chrUn | 57779690 | 57781357 | 1668  | CarSat1 | red    | na |
| chrUn | 57781390 | 57784090 | 2701  | CarSat1 | red    | na |
| chrUn | 57784120 | 57784874 | 755   | CarSat1 | red    | na |
| chrUn | 57785673 | 57787049 | 1377  | CarSat1 | red    | na |
| chrUn | 57787070 | 57789984 | 2915  | CarSat1 | red    | na |
| chrUn | 57790021 | 57792384 | 2364  | CarSat1 | red    | na |
| chrUn | 57793388 | 57795221 | 1834  | SAT1_CF | blue   | na |
| chrUn | 57795235 | 57795637 | 403   | SAT1_CF | blue   | na |
| chrUn | 57795677 | 57796178 | 502   | SAT1_CF | blue   | na |
| chrUn | 57796205 | 57796949 | 745   | SAT1_CF | blue   | na |
| chrUn | 57796963 | 57797575 | 613   | SAT1_CF | blue   | na |
| chrUn | 57797587 | 57798439 | 853   | SAT1_CF | blue   | na |

|       |          |          |              |        |    |
|-------|----------|----------|--------------|--------|----|
| chrUn | 57798490 | 57799566 | 1077 SAT1_CF | blue   | na |
| chrUn | 57799609 | 57800120 | 512 SAT1_CF  | blue   | na |
| chrUn | 57800147 | 57800289 | 143 SAT1_CF  | blue   | na |
| chrUn | 57800344 | 57800850 | 507 SAT1_CF  | blue   | na |
| chrUn | 57800872 | 57801530 | 659 SAT1_CF  | blue   | na |
| chrUn | 57801573 | 57801735 | 163 SAT1_CF  | blue   | na |
| chrUn | 57802840 | 57803068 | 229 SAT1_CF  | blue   | na |
| chrUn | 57803155 | 57803656 | 502 SAT1_CF  | blue   | na |
| chrUn | 57803679 | 57804351 | 673 SAT1_CF  | blue   | na |
| chrUn | 57804363 | 57805036 | 674 SAT1_CF  | blue   | na |
| chrUn | 57805085 | 57805585 | 501 SAT1_CF  | blue   | na |
| chrUn | 57805596 | 57805689 | 94 SAT1_CF   | blue   | na |
| chrUn | 57805719 | 57806970 | 1252 SAT1_CF | blue   | na |
| chrUn | 57806982 | 57807585 | 604 SAT1_CF  | blue   | na |
| chrUn | 57807604 | 57807700 | 97 SAT1_CF   | blue   | na |
| chrUn | 57807724 | 57808277 | 554 SAT1_CF  | blue   | na |
| chrUn | 57808289 | 57809154 | 866 SAT1_CF  | blue   | na |
| chrUn | 57809196 | 57811354 | 2159 SAT1_CF | blue   | na |
| chrUn | 57811366 | 57812021 | 656 SAT1_CF  | blue   | na |
| chrUn | 57812049 | 57812178 | 130 SAT1_CF  | blue   | na |
| chrUn | 57812250 | 57812751 | 502 SAT1_CF  | blue   | na |
| chrUn | 57812764 | 57815250 | 2487 SAT1_CF | blue   | na |
| chrUn | 57815329 | 57815494 | 166 SAT1_CF  | blue   | na |
| chrUn | 57815675 | 57815860 | 186 SAT1_CF  | blue   | na |
| chrUn | 57835402 | 57836045 | 644 Sat2CF   | purple | na |
| chrUn | 57843517 | 57844197 | 681 CarSat1  | red    | na |
| chrUn | 57844192 | 57844847 | 656 SAT1_CF  | blue   | na |
| chrUn | 57846061 | 57846626 | 566 SAT1_CF  | blue   | na |
| chrUn | 57846654 | 57847165 | 512 SAT1_CF  | blue   | na |
| chrUn | 57847220 | 57847847 | 628 SAT1_CF  | blue   | na |
| chrUn | 57847860 | 57848402 | 543 SAT1_CF  | blue   | na |
| chrUn | 57918401 | 57918647 | 247 Sat19CF  | na     | na |
| chrUn | 57950045 | 57950601 | 557 SAT1_CF  | blue   | na |
| chrUn | 57950644 | 57951322 | 679 SAT1_CF  | blue   | na |
| chrUn | 57951334 | 57951748 | 415 SAT1_CF  | blue   | na |
| chrUn | 57951722 | 57954423 | 2702 CarSat1 | red    | na |
| chrUn | 57954453 | 57955307 | 855 CarSat1  | red    | na |
| chrUn | 57955329 | 57956909 | 1581 CarSat1 | red    | na |
| chrUn | 57956939 | 57957638 | 700 CarSat1  | red    | na |
| chrUn | 58042992 | 58043481 | 490 SAT1_CF  | blue   | na |
| chrUn | 58043503 | 58043609 | 107 SAT1_CF  | blue   | na |
| chrUn | 58043622 | 58044123 | 502 SAT1_CF  | blue   | na |

|       |          |          |              |        |    |
|-------|----------|----------|--------------|--------|----|
| chrUn | 58044208 | 58046048 | 1841 SAT1_CF | blue   | na |
| chrUn | 58046069 | 58046169 | 101 SAT1_CF  | blue   | na |
| chrUn | 58046187 | 58046684 | 498 SAT1_CF  | blue   | na |
| chrUn | 58046697 | 58049476 | 2780 SAT1_CF | blue   | na |
| chrUn | 58049488 | 58050167 | 680 SAT1_CF  | blue   | na |
| chrUn | 58050184 | 58054553 | 4370 SAT1_CF | blue   | na |
| chrUn | 58054595 | 58055460 | 866 SAT1_CF  | blue   | na |
| chrUn | 58055472 | 58056027 | 556 SAT1_CF  | blue   | na |
| chrUn | 58056048 | 58056154 | 107 SAT1_CF  | blue   | na |
| chrUn | 58056167 | 58056849 | 683 SAT1_CF  | blue   | na |
| chrUn | 58056869 | 58057363 | 495 SAT1_CF  | blue   | na |
| chrUn | 58057399 | 58057735 | 337 SAT1_CF  | blue   | na |
| chrUn | 58057746 | 58058284 | 539 SAT1_CF  | blue   | na |
| chrUn | 58058364 | 58059324 | 961 SAT1_CF  | blue   | na |
| chrUn | 58059369 | 58060762 | 1394 SAT1_CF | blue   | na |
| chrUn | 58060774 | 58061457 | 684 SAT1_CF  | blue   | na |
| chrUn | 58061469 | 58062229 | 761 SAT1_CF  | blue   | na |
| chrUn | 58062242 | 58064051 | 1810 SAT1_CF | blue   | na |
| chrUn | 58068434 | 58069520 | 1087 Sat2CF  | purple | na |
| chrUn | 58069391 | 58069592 | 202 Sat2CF   | purple | na |
| chrUn | 58071211 | 58071620 | 410 CarSat1  | red    | na |
| chrUn | 58072426 | 58072568 | 143 CarSat1  | red    | na |
| chrUn | 58072618 | 58073442 | 825 CarSat1  | red    | na |
| chrUn | 58073463 | 58075044 | 1582 CarSat1 | red    | na |
| chrUn | 58075065 | 58075907 | 843 CarSat1  | red    | na |
| chrUn | 58075928 | 58077362 | 1435 CarSat1 | red    | na |
| chrUn | 58077521 | 58078376 | 856 CarSat1  | red    | na |
| chrUn | 58078395 | 58079343 | 949 CarSat1  | red    | na |
| chrUn | 58115126 | 58115350 | 225 Sat43CF  | na     | na |
| chrUn | 58132149 | 58132691 | 543 SAT1_CF  | blue   | na |
| chrUn | 58132735 | 58133395 | 661 SAT1_CF  | blue   | na |
| chrUn | 58133435 | 58133923 | 489 SAT1_CF  | blue   | na |
| chrUn | 58133951 | 58134087 | 137 SAT1_CF  | blue   | na |
| chrUn | 58134153 | 58134653 | 501 SAT1_CF  | blue   | na |
| chrUn | 58134668 | 58135350 | 683 SAT1_CF  | blue   | na |
| chrUn | 58135362 | 58136036 | 675 SAT1_CF  | blue   | na |
| chrUn | 58136080 | 58136818 | 739 SAT1_CF  | blue   | na |
| chrUn | 58137073 | 58138677 | 1605 SAT1_CF | blue   | na |
| chrUn | 58138719 | 58138884 | 166 SAT1_CF  | blue   | na |
| chrUn | 58139066 | 58139251 | 186 SAT1_CF  | blue   | na |
| chrUn | 58139268 | 58139788 | 521 SAT1_CF  | blue   | na |
| chrUn | 58139801 | 58139909 | 109 SAT1_CF  | blue   | na |

|       |          |          |              |        |    |
|-------|----------|----------|--------------|--------|----|
| chrUn | 58139929 | 58141172 | 1244 SAT1_CF | blue   | na |
| chrUn | 58141216 | 58142098 | 883 SAT1_CF  | blue   | na |
| chrUn | 58142112 | 58142657 | 546 SAT1_CF  | blue   | na |
| chrUn | 58142680 | 58142839 | 160 SAT1_CF  | blue   | na |
| chrUn | 58142852 | 58143236 | 385 SAT1_CF  | blue   | na |
| chrUn | 58143274 | 58143787 | 514 SAT1_CF  | blue   | na |
| chrUn | 58143807 | 58145619 | 1813 SAT1_CF | blue   | na |
| chrUn | 58145632 | 58146034 | 403 SAT1_CF  | blue   | na |
| chrUn | 58146074 | 58146576 | 503 SAT1_CF  | blue   | na |
| chrUn | 58146589 | 58148468 | 1880 SAT1_CF | blue   | na |
| chrUn | 58148585 | 58149247 | 663 SAT1_CF  | blue   | na |
| chrUn | 58149262 | 58149526 | 265 SAT1_CF  | blue   | na |
| chrUn | 58149562 | 58150071 | 510 SAT1_CF  | blue   | na |
| chrUn | 58150084 | 58150155 | 72 SAT1_CF   | blue   | na |
| chrUn | 58150178 | 58150729 | 552 SAT1_CF  | blue   | na |
| chrUn | 58150772 | 58151313 | 542 SAT1_CF  | blue   | na |
| chrUn | 58151359 | 58151918 | 560 SAT1_CF  | blue   | na |
| chrUn | 58152005 | 58152505 | 501 SAT1_CF  | blue   | na |
| chrUn | 58152523 | 58153276 | 754 SAT1_CF  | blue   | na |
| chrUn | 58208290 | 58211204 | 2915 CarSat1 | red    | na |
| chrUn | 58211219 | 58211346 | 128 Carsat2  | orange | na |
| chrUn | 58211234 | 58212922 | 1689 CarSat1 | red    | na |
| chrUn | 58212961 | 58213685 | 725 CarSat1  | red    | na |
| chrUn | 58213706 | 58214150 | 445 CarSat1  | red    | na |
| chrUn | 58214165 | 58214280 | 116 Carsat2  | orange | na |
| chrUn | 58214180 | 58214885 | 706 CarSat1  | red    | na |
| chrUn | 58214900 | 58215026 | 127 Carsat2  | orange | na |
| chrUn | 58214915 | 58215625 | 711 CarSat1  | red    | na |
| chrUn | 58215640 | 58215767 | 128 Carsat2  | orange | na |
| chrUn | 58215655 | 58217835 | 2181 CarSat1 | red    | na |
| chrUn | 58217865 | 58218947 | 1083 CarSat1 | red    | na |
| chrUn | 58219050 | 58219856 | 807 CarSat1  | red    | na |
| chrUn | 58219886 | 58219944 | 59 CarSat1   | red    | na |
| chrUn | 58220135 | 58220802 | 668 CarSat1  | red    | na |
| chrUn | 58220817 | 58220944 | 128 Carsat2  | orange | na |
| chrUn | 58220832 | 58222281 | 1450 CarSat1 | red    | na |
| chrUn | 58222296 | 58222421 | 126 Carsat2  | orange | na |
| chrUn | 58222311 | 58223017 | 707 CarSat1  | red    | na |
| chrUn | 58223032 | 58223159 | 128 Carsat2  | orange | na |
| chrUn | 58223047 | 58225226 | 2180 CarSat1 | red    | na |
| chrUn | 58225256 | 58226699 | 1444 CarSat1 | red    | na |
| chrUn | 58226714 | 58226841 | 128 Carsat2  | orange | na |

|       |          |          |      |         |        |    |
|-------|----------|----------|------|---------|--------|----|
| chrUn | 58226729 | 58227435 | 707  | CarSat1 | red    | na |
| chrUn | 58227450 | 58227576 | 127  | Carsat2 | orange | na |
| chrUn | 58227465 | 58228176 | 712  | CarSat1 | red    | na |
| chrUn | 58228191 | 58228318 | 128  | Carsat2 | orange | na |
| chrUn | 58228206 | 58229191 | 986  | CarSat1 | red    | na |
| chrUn | 58301110 | 58302898 | 1789 | CarSat1 | red    | na |
| chrUn | 58304427 | 58306424 | 1998 | CarSat1 | red    | na |
| chrUn | 58306445 | 58308609 | 2165 | CarSat1 | red    | na |
| chrUn | 58308789 | 58310778 | 1990 | CarSat1 | red    | na |
| chrUn | 58311489 | 58312939 | 1451 | CarSat1 | red    | na |
| chrUn | 58312960 | 58313389 | 430  | CarSat1 | red    | na |
| chrUn | 58313430 | 58314258 | 829  | CarSat1 | red    | na |
| chrUn | 58314447 | 58315078 | 632  | CarSat1 | red    | na |
| chrUn | 58315111 | 58315802 | 692  | CarSat1 | red    | na |
| chrUn | 58315831 | 58316543 | 713  | CarSat1 | red    | na |
| chrUn | 58316576 | 58317276 | 701  | CarSat1 | red    | na |
| chrUn | 58317301 | 58318569 | 1269 | CarSat1 | red    | na |
| chrUn | 58325166 | 58325744 | 579  | Sat2CF  | purple | na |
| chrUn | 58325231 | 58325752 | 522  | Sat2CF  | purple | na |
| chrUn | 58417324 | 58417993 | 670  | Sat7CF  | lime   | na |
| chrUn | 58441583 | 58442532 | 950  | CarSat1 | red    | na |
| chrUn | 58442683 | 58444129 | 1447 | CarSat1 | red    | na |
| chrUn | 58444289 | 58444932 | 644  | CarSat1 | red    | na |
| chrUn | 58444996 | 58445902 | 907  | CarSat1 | red    | na |
| chrUn | 58445923 | 58446158 | 236  | CarSat1 | red    | na |
| chrUn | 58446346 | 58447171 | 826  | CarSat1 | red    | na |
| chrUn | 58447208 | 58447909 | 702  | CarSat1 | red    | na |
| chrUn | 58447940 | 58451072 | 3133 | CarSat1 | red    | na |
| chrUn | 58451097 | 58453925 | 2829 | CarSat1 | red    | na |
| chrUn | 58453961 | 58455130 | 1170 | CarSat1 | red    | na |
| chrUn | 58455157 | 58456459 | 1303 | CarSat1 | red    | na |
| chrUn | 58457501 | 58465144 | 7644 | CarSat1 | red    | na |
| chrUn | 58465338 | 58466700 | 1363 | CarSat1 | red    | na |
| chrUn | 58466730 | 58467242 | 513  | CarSat1 | red    | na |
| chrUn | 58467598 | 58469433 | 1836 | CarSat1 | red    | na |
| chrUn | 58469449 | 58470169 | 721  | CarSat1 | red    | na |
| chrUn | 58470185 | 58471118 | 934  | CarSat1 | red    | na |
| chrUn | 58471133 | 58471260 | 128  | Carsat2 | orange | na |
| chrUn | 58471148 | 58472378 | 1231 | CarSat1 | red    | na |
| chrUn | 58472394 | 58473850 | 1457 | CarSat1 | red    | na |
| chrUn | 58473875 | 58474587 | 713  | CarSat1 | red    | na |
| chrUn | 58474603 | 58475324 | 722  | CarSat1 | red    | na |

|       |          |          |      |         |        |    |
|-------|----------|----------|------|---------|--------|----|
| chrUn | 58475349 | 58476546 | 1198 | CarSat1 | red    | na |
| chrUn | 58476573 | 58477535 | 963  | CarSat1 | red    | na |
| chrUn | 58477560 | 58478600 | 1041 | CarSat1 | red    | na |
| chrUn | 58482605 | 58483997 | 1393 | CarSat1 | red    | na |
| chrUn | 58484026 | 58484758 | 733  | CarSat1 | red    | na |
| chrUn | 58484776 | 58485831 | 1056 | CarSat1 | red    | na |
| chrUn | 58485872 | 58487233 | 1362 | SAT1_CF | blue   | na |
| chrUn | 58487471 | 58488368 | 898  | Sat2CF  | purple | na |
| chrUn | 58488234 | 58488396 | 163  | Sat2CF  | purple | na |
| chrUn | 58499475 | 58499710 | 236  | Sat2CF  | purple | na |
| chrUn | 58499516 | 58500125 | 610  | Sat2CF  | purple | na |
| chrUn | 58499804 | 58500194 | 391  | Sat2CF  | purple | na |
| chrUn | 58501216 | 58502915 | 1700 | CarSat1 | red    | na |
| chrUn | 58502942 | 58503652 | 711  | CarSat1 | red    | na |
| chrUn | 58503679 | 58504651 | 973  | CarSat1 | red    | na |
| chrUn | 58504665 | 58505126 | 462  | CarSat1 | red    | na |
| chrUn | 58505153 | 58505864 | 712  | CarSat1 | red    | na |
| chrUn | 58505891 | 58506885 | 995  | CarSat1 | red    | na |
| chrUn | 58506900 | 58507622 | 723  | CarSat1 | red    | na |
| chrUn | 58507644 | 58510286 | 2643 | CarSat1 | red    | na |
| chrUn | 58510313 | 58511024 | 712  | CarSat1 | red    | na |
| chrUn | 58511051 | 58511761 | 711  | CarSat1 | red    | na |
| chrUn | 58511788 | 58513235 | 1448 | CarSat1 | red    | na |
| chrUn | 58513262 | 58513972 | 711  | CarSat1 | red    | na |
| chrUn | 58513999 | 58515448 | 1450 | CarSat1 | red    | na |
| chrUn | 58515475 | 58516672 | 1198 | CarSat1 | red    | na |
| chrUn | 58516697 | 58517660 | 964  | CarSat1 | red    | na |
| chrUn | 58517687 | 58520141 | 2455 | CarSat1 | red    | na |
| chrUn | 58520169 | 58521704 | 1536 | CarSat1 | red    | na |
| chrUn | 58577157 | 58578781 | 1625 | CarSat1 | red    | na |
| chrUn | 58578802 | 58580387 | 1586 | CarSat1 | red    | na |
| chrUn | 58580418 | 58582013 | 1596 | CarSat1 | red    | na |
| chrUn | 58582034 | 58582343 | 310  | CarSat1 | red    | na |
| chrUn | 58582358 | 58582916 | 559  | CarSat1 | red    | na |
| chrUn | 58582979 | 58583767 | 789  | CarSat1 | red    | na |
| chrUn | 58583784 | 58585231 | 1448 | CarSat1 | red    | na |
| chrUn | 58585391 | 58586347 | 957  | CarSat1 | red    | na |
| chrUn | 58608504 | 58608754 | 251  | SAT1_CF | blue   | na |
| chrUn | 58608745 | 58610718 | 1974 | CarSat1 | red    | na |
| chrUn | 58610745 | 58612332 | 1588 | CarSat1 | red    | na |
| chrUn | 58612353 | 58613935 | 1583 | CarSat1 | red    | na |
| chrUn | 58613956 | 58614872 | 917  | CarSat1 | red    | na |

|       |          |          |      |         |        |    |
|-------|----------|----------|------|---------|--------|----|
| chrUn | 58620085 | 58621610 | 1526 | CarSat1 | red    | na |
| chrUn | 58621625 | 58621751 | 127  | Carsat2 | orange | na |
| chrUn | 58621640 | 58622346 | 707  | CarSat1 | red    | na |
| chrUn | 58622376 | 58623087 | 712  | CarSat1 | red    | na |
| chrUn | 58623103 | 58623229 | 127  | Carsat2 | orange | na |
| chrUn | 58623117 | 58623824 | 708  | CarSat1 | red    | na |
| chrUn | 58623854 | 58624339 | 486  | CarSat1 | red    | na |
| chrUn | 58624372 | 58625302 | 931  | CarSat1 | red    | na |
| chrUn | 58625317 | 58625443 | 127  | Carsat2 | orange | na |
| chrUn | 58625332 | 58626043 | 712  | CarSat1 | red    | na |
| chrUn | 58626058 | 58626185 | 128  | Carsat2 | orange | na |
| chrUn | 58626073 | 58626780 | 708  | CarSat1 | red    | na |
| chrUn | 58626795 | 58626922 | 128  | Carsat2 | orange | na |
| chrUn | 58626810 | 58627604 | 795  | CarSat1 | red    | na |
| chrUn | 58627634 | 58627760 | 127  | Carsat2 | orange | na |
| chrUn | 58627649 | 58628355 | 707  | CarSat1 | red    | na |
| chrUn | 58628370 | 58628497 | 128  | Carsat2 | orange | na |
| chrUn | 58628385 | 58629092 | 708  | CarSat1 | red    | na |
| chrUn | 58629122 | 58630100 | 979  | CarSat1 | red    | na |
| chrUn | 58630121 | 58630565 | 445  | CarSat1 | red    | na |
| chrUn | 58630580 | 58630707 | 128  | Carsat2 | orange | na |
| chrUn | 58630595 | 58631302 | 708  | CarSat1 | red    | na |
| chrUn | 58631317 | 58631443 | 127  | Carsat2 | orange | na |
| chrUn | 58631332 | 58632038 | 707  | CarSat1 | red    | na |
| chrUn | 58632053 | 58632180 | 128  | Carsat2 | orange | na |
| chrUn | 58632068 | 58632775 | 708  | CarSat1 | red    | na |
| chrUn | 58632790 | 58632916 | 127  | Carsat2 | orange | na |
| chrUn | 58632805 | 58633512 | 708  | CarSat1 | red    | na |
| chrUn | 58633527 | 58633654 | 128  | Carsat2 | orange | na |
| chrUn | 58633542 | 58634249 | 708  | CarSat1 | red    | na |
| chrUn | 58634278 | 58634982 | 705  | CarSat1 | red    | na |
| chrUn | 58635012 | 58635718 | 707  | CarSat1 | red    | na |
| chrUn | 58635748 | 58636450 | 703  | CarSat1 | red    | na |
| chrUn | 58636465 | 58636588 | 124  | Carsat2 | orange | na |
| chrUn | 58636480 | 58637925 | 1446 | CarSat1 | red    | na |
| chrUn | 58637940 | 58638067 | 128  | Carsat2 | orange | na |
| chrUn | 58637955 | 58638662 | 708  | CarSat1 | red    | na |
| chrUn | 58638677 | 58638803 | 127  | Carsat2 | orange | na |
| chrUn | 58638692 | 58640508 | 1817 | CarSat1 | red    | na |
| chrUn | 58658729 | 58659466 | 738  | Sat2CF  | purple | na |
| chrUn | 58658731 | 58659392 | 662  | Sat2CF  | purple | na |
| chrUn | 58668681 | 58670283 | 1603 | SAT1_CF | blue   | na |



|       |          |          |              |        |    |
|-------|----------|----------|--------------|--------|----|
| chrUn | 58670295 | 58671717 | 1423 SAT1_CF | blue   | na |
| chrUn | 58671750 | 58672266 | 517 SAT1_CF  | blue   | na |
| chrUn | 58673673 | 58674252 | 580 SAT1_CF  | blue   | na |
| chrUn | 58674266 | 58675218 | 953 SAT1_CF  | blue   | na |
| chrUn | 58675240 | 58675347 | 108 SAT1_CF  | blue   | na |
| chrUn | 58675359 | 58676040 | 682 SAT1_CF  | blue   | na |
| chrUn | 58676054 | 58676572 | 519 SAT1_CF  | blue   | na |
| chrUn | 58676610 | 58677502 | 893 SAT1_CF  | blue   | na |
| chrUn | 58677583 | 58678107 | 525 SAT1_CF  | blue   | na |
| chrUn | 58678129 | 58678237 | 109 SAT1_CF  | blue   | na |
| chrUn | 58678249 | 58679481 | 1233 SAT1_CF | blue   | na |
| chrUn | 58679499 | 58680023 | 525 SAT1_CF  | blue   | na |
| chrUn | 58680045 | 58680153 | 109 SAT1_CF  | blue   | na |
| chrUn | 58680165 | 58681760 | 1596 SAT1_CF | blue   | na |
| chrUn | 58681772 | 58682479 | 708 SAT1_CF  | blue   | na |
| chrUn | 58682547 | 58684258 | 1712 SAT1_CF | blue   | na |
| chrUn | 58684272 | 58684792 | 521 SAT1_CF  | blue   | na |
| chrUn | 58684849 | 58685970 | 1122 SAT1_CF | blue   | na |
| chrUn | 58685984 | 58686966 | 983 SAT1_CF  | blue   | na |
| chrUn | 58686994 | 58688554 | 1561 SAT1_CF | blue   | na |
| chrUn | 58688567 | 58689057 | 491 SAT1_CF  | blue   | na |
| chrUn | 58703914 | 58705081 | 1168 Sat10CF | na     | na |
| chrUn | 58704546 | 58705765 | 1220 Sat10CF | na     | na |
| chrUn | 58704773 | 58705945 | 1173 Sat10CF | na     | na |
| chrUn | 58705416 | 58706605 | 1190 Sat10CF | na     | na |
| chrUn | 58705583 | 58706785 | 1203 Sat10CF | na     | na |
| chrUn | 58705943 | 58707135 | 1193 Sat10CF | na     | na |
| chrUn | 58706063 | 58707258 | 1196 Sat10CF | na     | na |
| chrUn | 58732812 | 58735499 | 2688 CarSat1 | red    | na |
| chrUn | 58735523 | 58736473 | 951 CarSat1  | red    | na |
| chrUn | 58736495 | 58736620 | 126 Carsat2  | orange | na |
| chrUn | 58736510 | 58737221 | 712 CarSat1  | red    | na |
| chrUn | 58737251 | 58737958 | 708 CarSat1  | red    | na |
| chrUn | 58737988 | 58738694 | 707 CarSat1  | red    | na |
| chrUn | 58738712 | 58738837 | 126 Carsat2  | orange | na |
| chrUn | 58738726 | 58740169 | 1444 CarSat1 | red    | na |
| chrUn | 58740199 | 58741110 | 912 CarSat1  | red    | na |
| chrUn | 58741874 | 58743421 | 1548 CarSat1 | red    | na |
| chrUn | 58743436 | 58743563 | 128 Carsat2  | orange | na |
| chrUn | 58743451 | 58743937 | 487 CarSat1  | red    | na |
| chrUn | 58743958 | 58747381 | 3424 CarSat1 | red    | na |
| chrUn | 58747410 | 58748360 | 951 CarSat1  | red    | na |

|       |          |          |      |         |        |    |
|-------|----------|----------|------|---------|--------|----|
| chrUn | 58748387 | 58749098 | 712  | CarSat1 | red    | na |
| chrUn | 58749124 | 58751386 | 2263 | CarSat1 | red    | na |
| chrUn | 58751573 | 58752464 | 892  | CarSat1 | red    | na |
| chrUn | 58752496 | 58753199 | 704  | CarSat1 | red    | na |
| chrUn | 58753228 | 58753823 | 596  | CarSat1 | red    | na |
| chrUn | 58754837 | 58756162 | 1326 | CarSat1 | red    | na |
| chrUn | 58756183 | 58759834 | 3652 | CarSat1 | red    | na |
| chrUn | 58759855 | 58760833 | 979  | CarSat1 | red    | na |
| chrUn | 58760863 | 58765709 | 4847 | CarSat1 | red    | na |
| chrUn | 58765730 | 58767442 | 1713 | CarSat1 | red    | na |
| chrUn | 58767472 | 58770089 | 2618 | CarSat1 | red    | na |
| chrUn | 58770110 | 58771825 | 1716 | CarSat1 | red    | na |
| chrUn | 58771859 | 58773766 | 1908 | CarSat1 | red    | na |
| chrUn | 58773787 | 58775038 | 1252 | CarSat1 | red    | na |
| chrUn | 58840508 | 58841459 | 952  | CarSat1 | red    | na |
| chrUn | 58841608 | 58842330 | 723  | CarSat1 | red    | na |
| chrUn | 58842479 | 58843107 | 629  | CarSat1 | red    | na |
| chrUn | 58843362 | 58843697 | 336  | CarSat1 | red    | na |
| chrUn | 58843880 | 58844228 | 349  | CarSat1 | red    | na |
| chrUn | 58844441 | 58845090 | 650  | CarSat1 | red    | na |
| chrUn | 58845359 | 58846049 | 691  | CarSat1 | red    | na |
| chrUn | 58846209 | 58846855 | 647  | CarSat1 | red    | na |
| chrUn | 58892364 | 58893036 | 673  | Sat2CF  | purple | na |
| chrUn | 58892435 | 58893285 | 851  | Sat2CF  | purple | na |
| chrUn | 58893149 | 58893311 | 163  | Sat2CF  | purple | na |
| chrUn | 58909330 | 58909710 | 381  | CarSat1 | red    | na |
| chrUn | 58911348 | 58912303 | 956  | Sat2CF  | purple | na |
| chrUn | 58916159 | 58916738 | 580  | SAT1_CF | blue   | na |
| chrUn | 58916776 | 58917276 | 501  | SAT1_CF | blue   | na |
| chrUn | 58917289 | 58917965 | 677  | SAT1_CF | blue   | na |
| chrUn | 58918008 | 58918974 | 967  | SAT1_CF | blue   | na |
| chrUn | 58919054 | 58919964 | 911  | SAT1_CF | blue   | na |
| chrUn | 58920051 | 58920639 | 589  | SAT1_CF | blue   | na |
| chrUn | 58920660 | 58921330 | 671  | SAT1_CF | blue   | na |
| chrUn | 58921344 | 58922873 | 1530 | SAT1_CF | blue   | na |
| chrUn | 58922954 | 58923119 | 166  | SAT1_CF | blue   | na |
| chrUn | 58923301 | 58923486 | 186  | SAT1_CF | blue   | na |
| chrUn | 58923522 | 58924022 | 501  | SAT1_CF | blue   | na |
| chrUn | 58924035 | 58924783 | 749  | SAT1_CF | blue   | na |
| chrUn | 58924800 | 58925659 | 860  | SAT1_CF | blue   | na |
| chrUn | 58925712 | 58926212 | 501  | SAT1_CF | blue   | na |
| chrUn | 58926225 | 58926332 | 108  | SAT1_CF | blue   | na |

|       |          |          |              |        |    |
|-------|----------|----------|--------------|--------|----|
| chrUn | 58926354 | 58928254 | 1901 SAT1_CF | blue   | na |
| chrUn | 58928298 | 58929630 | 1333 SAT1_CF | blue   | na |
| chrUn | 58929717 | 58930218 | 502 SAT1_CF  | blue   | na |
| chrUn | 58930230 | 58930339 | 110 SAT1_CF  | blue   | na |
| chrUn | 58930360 | 58931420 | 1061 SAT1_CF | blue   | na |
| chrUn | 58931433 | 58932594 | 1162 SAT1_CF | blue   | na |
| chrUn | 58932636 | 58935554 | 2919 SAT1_CF | blue   | na |
| chrUn | 58935590 | 58936131 | 542 SAT1_CF  | blue   | na |
| chrUn | 58958153 | 58961135 | 2983 CarSat1 | red    | na |
| chrUn | 58961161 | 58962357 | 1197 CarSat1 | red    | na |
| chrUn | 58962384 | 58963094 | 711 CarSat1  | red    | na |
| chrUn | 58963121 | 58964084 | 964 CarSat1  | red    | na |
| chrUn | 58964100 | 58964822 | 723 CarSat1  | red    | na |
| chrUn | 58964847 | 58965558 | 712 CarSat1  | red    | na |
| chrUn | 58965584 | 58966294 | 711 CarSat1  | red    | na |
| chrUn | 58966310 | 58967517 | 1208 CarSat1 | red    | na |
| chrUn | 58967544 | 58968497 | 954 CarSat1  | red    | na |
| chrUn | 58968521 | 58969244 | 724 CarSat1  | red    | na |
| chrUn | 58969260 | 58969729 | 470 CarSat1  | red    | na |
| chrUn | 58969756 | 58970462 | 707 CarSat1  | red    | na |
| chrUn | 58970489 | 58973876 | 3388 CarSat1 | red    | na |
| chrUn | 58973906 | 58976606 | 2701 CarSat1 | red    | na |
| chrUn | 58976622 | 58977341 | 720 CarSat1  | red    | na |
| chrUn | 58977357 | 58978118 | 762 CarSat1  | red    | na |
| chrUn | 58979121 | 58980371 | 1251 CarSat1 | red    | na |
| chrUn | 58980399 | 58980859 | 461 CarSat1  | red    | na |
| chrUn | 58980884 | 58982583 | 1700 CarSat1 | red    | na |
| chrUn | 58982610 | 58983666 | 1057 CarSat1 | red    | na |
| chrUn | 58983843 | 58984994 | 1152 CarSat1 | red    | na |
| chrUn | 58985021 | 58985732 | 712 CarSat1  | red    | na |
| chrUn | 58985759 | 58987206 | 1448 CarSat1 | red    | na |
| chrUn | 58987233 | 58987943 | 711 CarSat1  | red    | na |
| chrUn | 58987970 | 58990155 | 2186 CarSat1 | red    | na |
| chrUn | 58990182 | 58991630 | 1449 CarSat1 | red    | na |
| chrUn | 58991647 | 58992257 | 611 CarSat1  | red    | na |
| chrUn | 58992456 | 58992555 | 100 CarSat1  | red    | na |
| chrUn | 58992569 | 58993155 | 587 CarSat1  | red    | na |
| chrUn | 59000703 | 59001871 | 1169 Sat2CF  | purple | na |
| chrUn | 59001693 | 59001902 | 210 Sat2CF   | purple | na |
| chrUn | 59016604 | 59017391 | 788 Sat2CF   | purple | na |
| chrUn | 59024650 | 59025523 | 874 CarSat1  | red    | na |
| chrUn | 59025629 | 59026478 | 850 CarSat1  | red    | na |

|       |          |          |      |         |      |    |
|-------|----------|----------|------|---------|------|----|
| chrUn | 59026512 | 59026973 | 462  | CarSat1 | red  | na |
| chrUn | 59027154 | 59027489 | 336  | CarSat1 | red  | na |
| chrUn | 59027730 | 59028335 | 606  | CarSat1 | red  | na |
| chrUn | 59030543 | 59031258 | 716  | CarSat1 | red  | na |
| chrUn | 59031408 | 59031801 | 394  | CarSat1 | red  | na |
| chrUn | 59031841 | 59032517 | 677  | CarSat1 | red  | na |
| chrUn | 59032582 | 59034434 | 1853 | SAT1_CF | blue | na |
| chrUn | 59034477 | 59034652 | 176  | SAT1_CF | blue | na |
| chrUn | 59034680 | 59035224 | 545  | SAT1_CF | blue | na |
| chrUn | 59035304 | 59035816 | 513  | SAT1_CF | blue | na |
| chrUn | 59035844 | 59036640 | 797  | SAT1_CF | blue | na |
| chrUn | 59036654 | 59038172 | 1519 | SAT1_CF | blue | na |
| chrUn | 59038187 | 59039888 | 1702 | SAT1_CF | blue | na |
| chrUn | 59039878 | 59040592 | 715  | CarSat1 | red  | na |
| chrUn | 59040624 | 59040985 | 362  | CarSat1 | red  | na |
| chrUn | 59041986 | 59044094 | 2109 | CarSat1 | red  | na |
| chrUn | 59045029 | 59048592 | 3564 | CarSat1 | red  | na |
| chrUn | 59048626 | 59049063 | 438  | CarSat1 | red  | na |
| chrUn | 59049084 | 59049634 | 551  | CarSat1 | red  | na |
| chrUn | 59049872 | 59051556 | 1685 | CarSat1 | red  | na |
| chrUn | 59053462 | 59056859 | 3398 | CarSat1 | red  | na |
| chrUn | 59056875 | 59058410 | 1536 | CarSat1 | red  | na |
| chrUn | 59058577 | 59059011 | 435  | CarSat1 | red  | na |
| chrUn | 59059036 | 59059755 | 720  | CarSat1 | red  | na |
| chrUn | 59059771 | 59060493 | 723  | CarSat1 | red  | na |
| chrUn | 59060509 | 59061372 | 864  | CarSat1 | red  | na |
| chrUn | 59063198 | 59064425 | 1228 | CarSat1 | red  | na |
| chrUn | 59065265 | 59066424 | 1160 | CarSat1 | red  | na |
| chrUn | 59074489 | 59075672 | 1184 | CarSat1 | red  | na |
| chrUn | 59076678 | 59077043 | 366  | SAT1_CF | blue | na |
| chrUn | 59077055 | 59078388 | 1334 | SAT1_CF | blue | na |
| chrUn | 59078432 | 59078996 | 565  | SAT1_CF | blue | na |
| chrUn | 59079076 | 59079601 | 526  | SAT1_CF | blue | na |
| chrUn | 59079616 | 59079773 | 158  | SAT1_CF | blue | na |
| chrUn | 59079818 | 59080320 | 503  | SAT1_CF | blue | na |
| chrUn | 59080342 | 59081016 | 675  | SAT1_CF | blue | na |
| chrUn | 59081028 | 59081700 | 673  | SAT1_CF | blue | na |
| chrUn | 59081747 | 59082121 | 375  | SAT1_CF | blue | na |
| chrUn | 59082177 | 59083776 | 1600 | SAT1_CF | blue | na |
| chrUn | 59083855 | 59084118 | 264  | SAT1_CF | blue | na |
| chrUn | 59084148 | 59084672 | 525  | SAT1_CF | blue | na |
| chrUn | 59084742 | 59084840 | 99   | SAT1_CF | blue | na |

|       |          |          |              |      |    |
|-------|----------|----------|--------------|------|----|
| chrUn | 59084887 | 59085389 | 503 SAT1_CF  | blue | na |
| chrUn | 59085402 | 59086162 | 761 SAT1_CF  | blue | na |
| chrUn | 59086174 | 59086848 | 675 SAT1_CF  | blue | na |
| chrUn | 59086891 | 59088050 | 1160 SAT1_CF | blue | na |
| chrUn | 59089036 | 59089565 | 530 SAT1_CF  | blue | na |
| chrUn | 59089681 | 59090641 | 961 SAT1_CF  | blue | na |
| chrUn | 59090701 | 59091182 | 482 SAT1_CF  | blue | na |
| chrUn | 59091194 | 59091879 | 686 SAT1_CF  | blue | na |
| chrUn | 59091901 | 59092567 | 667 SAT1_CF  | blue | na |
| chrUn | 59092612 | 59093832 | 1221 SAT1_CF | blue | na |
| chrUn | 59093912 | 59094436 | 525 SAT1_CF  | blue | na |
| chrUn | 59094451 | 59094608 | 158 SAT1_CF  | blue | na |
| chrUn | 59094634 | 59095809 | 1176 SAT1_CF | blue | na |
| chrUn | 59095822 | 59097217 | 1396 SAT1_CF | blue | na |
| chrUn | 59097232 | 59097538 | 307 SAT1_CF  | blue | na |
| chrUn | 59098570 | 59099132 | 563 CarSat1  | red  | na |
| chrUn | 59099162 | 59099604 | 443 CarSat1  | red  | na |
| chrUn | 59099626 | 59100603 | 978 CarSat1  | red  | na |
| chrUn | 59100633 | 59101359 | 727 CarSat1  | red  | na |
| chrUn | 59101374 | 59102833 | 1460 CarSat1 | red  | na |
| chrUn | 59102847 | 59103555 | 709 CarSat1  | red  | na |
| chrUn | 59103585 | 59104307 | 723 CarSat1  | red  | na |
| chrUn | 59104322 | 59105783 | 1462 CarSat1 | red  | na |
| chrUn | 59105798 | 59106520 | 723 CarSat1  | red  | na |
| chrUn | 59106535 | 59108732 | 2198 CarSat1 | red  | na |
| chrUn | 59108747 | 59110660 | 1914 CarSat1 | red  | na |
| chrUn | 59110687 | 59112864 | 2178 CarSat1 | red  | na |
| chrUn | 59112891 | 59116547 | 3657 CarSat1 | red  | na |
| chrUn | 59116568 | 59117544 | 977 CarSat1  | red  | na |
| chrUn | 59117574 | 59118496 | 923 CarSat1  | red  | na |
| chrUn | 59146953 | 59148306 | 1354 CarSat1 | red  | na |
| chrUn | 59148327 | 59148795 | 469 CarSat1  | red  | na |
| chrUn | 59148820 | 59151500 | 2681 CarSat1 | red  | na |
| chrUn | 59151522 | 59156122 | 4601 CarSat1 | red  | na |
| chrUn | 59156147 | 59156861 | 715 CarSat1  | red  | na |
| chrUn | 59156888 | 59157353 | 466 CarSat1  | red  | na |
| chrUn | 59157369 | 59158086 | 718 CarSat1  | red  | na |
| chrUn | 59158102 | 59160281 | 2180 CarSat1 | red  | na |
| chrUn | 59160306 | 59161014 | 709 CarSat1  | red  | na |
| chrUn | 59161039 | 59162001 | 963 CarSat1  | red  | na |
| chrUn | 59162028 | 59162739 | 712 CarSat1  | red  | na |
| chrUn | 59162766 | 59164209 | 1444 CarSat1 | red  | na |

|       |          |          |      |         |      |    |
|-------|----------|----------|------|---------|------|----|
| chrUn | 59164237 | 59166622 | 2386 | CarSat1 | red  | na |
| chrUn | 59218285 | 59220363 | 2079 | SAT1_CF | blue | na |
| chrUn | 59220392 | 59221851 | 1460 | SAT1_CF | blue | na |
| chrUn | 59221873 | 59222351 | 479  | SAT1_CF | blue | na |
| chrUn | 59222417 | 59222813 | 397  | SAT1_CF | blue | na |
| chrUn | 59222826 | 59224801 | 1976 | SAT1_CF | blue | na |
| chrUn | 59224918 | 59226800 | 1883 | SAT1_CF | blue | na |
| chrUn | 59226813 | 59227295 | 483  | SAT1_CF | blue | na |
| chrUn | 59227355 | 59227756 | 402  | SAT1_CF | blue | na |
| chrUn | 59227769 | 59228276 | 508  | SAT1_CF | blue | na |
| chrUn | 59229037 | 59229147 | 111  | SAT1_CF | blue | na |
| chrUn | 59229169 | 59230473 | 1305 | SAT1_CF | blue | na |
| chrUn | 59230516 | 59231182 | 667  | SAT1_CF | blue | na |
| chrUn | 59231204 | 59232496 | 1293 | SAT1_CF | blue | na |
| chrUn | 59232508 | 59233061 | 554  | SAT1_CF | blue | na |
| chrUn | 59233082 | 59233191 | 110  | SAT1_CF | blue | na |
| chrUn | 59233203 | 59233705 | 503  | SAT1_CF | blue | na |
| chrUn | 59233771 | 59233907 | 137  | SAT1_CF | blue | na |
| chrUn | 59233935 | 59235114 | 1180 | SAT1_CF | blue | na |
| chrUn | 59235136 | 59235243 | 108  | SAT1_CF | blue | na |
| chrUn | 59235256 | 59235775 | 520  | SAT1_CF | blue | na |
| chrUn | 59235796 | 59236188 | 393  | SAT1_CF | blue | na |
| chrUn | 59236199 | 59236745 | 547  | SAT1_CF | blue | na |
| chrUn | 59236791 | 59237433 | 643  | SAT1_CF | blue | na |
| chrUn | 59237446 | 59237946 | 501  | SAT1_CF | blue | na |
| chrUn | 59238013 | 59238146 | 134  | SAT1_CF | blue | na |
| chrUn | 59238363 | 59238849 | 487  | SAT1_CF | blue | na |
| chrUn | 59239851 | 59240402 | 552  | CarSat1 | red  | na |
| chrUn | 59240429 | 59241139 | 711  | CarSat1 | red  | na |
| chrUn | 59241166 | 59242127 | 962  | CarSat1 | red  | na |
| chrUn | 59242143 | 59242611 | 469  | CarSat1 | red  | na |
| chrUn | 59242638 | 59243351 | 714  | CarSat1 | red  | na |
| chrUn | 59243376 | 59244086 | 711  | CarSat1 | red  | na |
| chrUn | 59244113 | 59245072 | 960  | CarSat1 | red  | na |
| chrUn | 59245088 | 59246289 | 1202 | CarSat1 | red  | na |
| chrUn | 59246316 | 59247026 | 711  | CarSat1 | red  | na |
| chrUn | 59247053 | 59248010 | 958  | CarSat1 | red  | na |
| chrUn | 59248026 | 59249233 | 1208 | CarSat1 | red  | na |
| chrUn | 59249258 | 59249966 | 709  | CarSat1 | red  | na |
| chrUn | 59249993 | 59250955 | 963  | CarSat1 | red  | na |
| chrUn | 59250971 | 59251693 | 723  | CarSat1 | red  | na |
| chrUn | 59251709 | 59252909 | 1201 | CarSat1 | red  | na |

|       |          |          |      |         |        |    |
|-------|----------|----------|------|---------|--------|----|
| chrUn | 59252936 | 59253647 | 712  | CarSat1 | red    | na |
| chrUn | 59253674 | 59254636 | 963  | CarSat1 | red    | na |
| chrUn | 59254652 | 59255857 | 1206 | CarSat1 | red    | na |
| chrUn | 59255884 | 59256591 | 708  | CarSat1 | red    | na |
| chrUn | 59256618 | 59257328 | 711  | CarSat1 | red    | na |
| chrUn | 59257355 | 59258062 | 708  | CarSat1 | red    | na |
| chrUn | 59258093 | 59259708 | 1616 | CarSat1 | red    | na |
| chrUn | 59260716 | 59260822 | 107  | Carsat2 | orange | na |
| chrUn | 59260741 | 59261854 | 1114 | CarSat1 | red    | na |
| chrUn | 59261884 | 59262863 | 980  | CarSat1 | red    | na |
| chrUn | 59262890 | 59263602 | 713  | CarSat1 | red    | na |
| chrUn | 59263629 | 59265078 | 1450 | CarSat1 | red    | na |
| chrUn | 59265105 | 59266315 | 1211 | CarSat1 | red    | na |
| chrUn | 59267206 | 59267758 | 553  | CarSat1 | red    | na |
| chrUn | 59267788 | 59269750 | 1963 | CarSat1 | red    | na |
| chrUn | 59269774 | 59271228 | 1455 | CarSat1 | red    | na |
| chrUn | 59271252 | 59272932 | 1681 | CarSat1 | red    | na |
| chrUn | 59272962 | 59273673 | 712  | CarSat1 | red    | na |
| chrUn | 59273688 | 59273814 | 127  | Carsat2 | orange | na |
| chrUn | 59273703 | 59274414 | 712  | CarSat1 | red    | na |
| chrUn | 59274429 | 59274555 | 127  | Carsat2 | orange | na |
| chrUn | 59274444 | 59274997 | 554  | CarSat1 | red    | na |
| chrUn | 59294186 | 59295534 | 1349 | CarSat1 | red    | na |
| chrUn | 59295564 | 59297746 | 2183 | CarSat1 | red    | na |
| chrUn | 59297776 | 59298998 | 1223 | CarSat1 | red    | na |
| chrUn | 59299022 | 59299661 | 640  | CarSat1 | red    | na |
| chrUn | 59299871 | 59300601 | 731  | CarSat1 | red    | na |
| chrUn | 59301632 | 59302800 | 1169 | SAT1_CF | blue   | na |
| chrUn | 59309625 | 59310341 | 717  | SAT1_CF | blue   | na |
| chrUn | 59310419 | 59310927 | 509  | SAT1_CF | blue   | na |
| chrUn | 59310941 | 59311592 | 652  | SAT1_CF | blue   | na |
| chrUn | 59313340 | 59313947 | 608  | SAT1_CF | blue   | na |
| chrUn | 59313961 | 59314646 | 686  | SAT1_CF | blue   | na |
| chrUn | 59315021 | 59315365 | 345  | SAT1_CF | blue   | na |
| chrUn | 59315391 | 59315955 | 565  | SAT1_CF | blue   | na |
| chrUn | 59316035 | 59316301 | 267  | SAT1_CF | blue   | na |
| chrUn | 59317503 | 59317734 | 232  | SAT1_CF | blue   | na |
| chrUn | 59317747 | 59318419 | 673  | SAT1_CF | blue   | na |
| chrUn | 59318464 | 59319096 | 633  | SAT1_CF | blue   | na |
| chrUn | 59319124 | 59320359 | 1236 | SAT1_CF | blue   | na |
| chrUn | 59320371 | 59321595 | 1225 | SAT1_CF | blue   | na |
| chrUn | 59321629 | 59322088 | 460  | SAT1_CF | blue   | na |

|       |          |          |              |      |    |
|-------|----------|----------|--------------|------|----|
| chrUn | 59322489 | 59323116 | 628 SAT1_CF  | blue | na |
| chrUn | 59323163 | 59324254 | 1092 SAT1_CF | blue | na |
| chrUn | 59330142 | 59330241 | 100 SAT1_CF  | blue | na |
| chrUn | 59330253 | 59332177 | 1925 SAT1_CF | blue | na |
| chrUn | 59332204 | 59332724 | 521 SAT1_CF  | blue | na |
| chrUn | 59332766 | 59333078 | 313 SAT1_CF  | blue | na |
| chrUn | 59333089 | 59333275 | 187 SAT1_CF  | blue | na |
| chrUn | 59336029 | 59336602 | 574 SAT1_CF  | blue | na |
| chrUn | 59336642 | 59337136 | 495 SAT1_CF  | blue | na |
| chrUn | 59337156 | 59337839 | 684 SAT1_CF  | blue | na |
| chrUn | 59337862 | 59338213 | 352 SAT1_CF  | blue | na |
| chrUn | 59338779 | 59339952 | 1174 SAT1_CF | blue | na |
| chrUn | 59340983 | 59342032 | 1050 CarSat1 | red  | na |
| chrUn | 59342063 | 59343651 | 1589 CarSat1 | red  | na |
| chrUn | 59367405 | 59367505 | 101 Sat7CF   | lime | na |
| chrUn | 59367452 | 59368214 | 763 Sat7CF   | lime | na |
| chrUn | 59367531 | 59368214 | 684 Sat7CF   | lime | na |
| chrUn | 59384986 | 59385963 | 978 CarSat1  | red  | na |
| chrUn | 59385988 | 59386708 | 721 CarSat1  | red  | na |
| chrUn | 59386724 | 59387436 | 713 CarSat1  | red  | na |
| chrUn | 59387461 | 59389899 | 2439 CarSat1 | red  | na |
| chrUn | 59389926 | 59390394 | 469 CarSat1  | red  | na |
| chrUn | 59390410 | 59391082 | 673 CarSat1  | red  | na |
| chrUn | 59391469 | 59392000 | 532 CarSat1  | red  | na |
| chrUn | 59392016 | 59393475 | 1460 CarSat1 | red  | na |
| chrUn | 59393491 | 59395933 | 2443 CarSat1 | red  | na |
| chrUn | 59395955 | 59396665 | 711 CarSat1  | red  | na |
| chrUn | 59396692 | 59397672 | 981 CarSat1  | red  | na |
| chrUn | 59397702 | 59398879 | 1178 CarSat1 | red  | na |
| chrUn | 59398906 | 59399450 | 545 CarSat1  | red  | na |
| chrUn | 59401157 | 59402266 | 1110 CarSat1 | red  | na |
| chrUn | 59402295 | 59403257 | 963 CarSat1  | red  | na |
| chrUn | 59403284 | 59404257 | 974 CarSat1  | red  | na |
| chrUn | 59404287 | 59405462 | 1176 CarSat1 | red  | na |
| chrUn | 59405488 | 59406745 | 1258 CarSat1 | red  | na |
| chrUn | 59407802 | 59408238 | 437 SAT1_CF  | blue | na |
| chrUn | 59408251 | 59409919 | 1669 SAT1_CF | blue | na |
| chrUn | 59409962 | 59411513 | 1552 SAT1_CF | blue | na |
| chrUn | 59411526 | 59411881 | 356 SAT1_CF  | blue | na |
| chrUn | 59411968 | 59412469 | 502 SAT1_CF  | blue | na |
| chrUn | 59412496 | 59413156 | 661 SAT1_CF  | blue | na |
| chrUn | 59413203 | 59413320 | 118 SAT1_CF  | blue | na |



|       |          |          |              |        |    |
|-------|----------|----------|--------------|--------|----|
| chrUn | 59413362 | 59413903 | 542 SAT1_CF  | blue   | na |
| chrUn | 59413941 | 59415170 | 1230 SAT1_CF | blue   | na |
| chrUn | 59415287 | 59415807 | 521 SAT1_CF  | blue   | na |
| chrUn | 59415838 | 59417845 | 2008 SAT1_CF | blue   | na |
| chrUn | 59417898 | 59418398 | 501 SAT1_CF  | blue   | na |
| chrUn | 59418423 | 59419093 | 671 SAT1_CF  | blue   | na |
| chrUn | 59419105 | 59420439 | 1335 SAT1_CF | blue   | na |
| chrUn | 59420483 | 59421046 | 564 SAT1_CF  | blue   | na |
| chrUn | 59421126 | 59421392 | 267 SAT1_CF  | blue   | na |
| chrUn | 59421495 | 59423781 | 2287 SAT1_CF | blue   | na |
| chrUn | 59423808 | 59425181 | 1374 SAT1_CF | blue   | na |
| chrUn | 59425193 | 59425868 | 676 SAT1_CF  | blue   | na |
| chrUn | 59425880 | 59426053 | 174 SAT1_CF  | blue   | na |
| chrUn | 59426096 | 59426886 | 791 SAT1_CF  | blue   | na |
| chrUn | 59426930 | 59427542 | 613 SAT1_CF  | blue   | na |
| chrUn | 59428544 | 59430384 | 1841 CarSat1 | red    | na |
| chrUn | 59430399 | 59432810 | 2412 CarSat1 | red    | na |
| chrUn | 59432834 | 59437009 | 4176 CarSat1 | red    | na |
| chrUn | 59437025 | 59438483 | 1459 CarSat1 | red    | na |
| chrUn | 59438499 | 59439204 | 706 CarSat1  | red    | na |
| chrUn | 59439234 | 59446058 | 6825 CarSat1 | red    | na |
| chrUn | 59446091 | 59447784 | 1694 CarSat1 | red    | na |
| chrUn | 59447805 | 59448263 | 459 CarSat1  | red    | na |
| chrUn | 59476653 | 59477198 | 546 Sat2CF   | purple | na |
| chrUn | 59496147 | 59496936 | 790 CarSat1  | red    | na |
| chrUn | 59496966 | 59497674 | 709 CarSat1  | red    | na |
| chrUn | 59497689 | 59497816 | 128 Carsat2  | orange | na |
| chrUn | 59497704 | 59499300 | 1597 CarSat1 | red    | na |
| chrUn | 59500333 | 59501242 | 910 CarSat1  | red    | na |
| chrUn | 59501253 | 59503920 | 2668 CarSat1 | red    | na |
| chrUn | 59503935 | 59504062 | 128 Carsat2  | orange | na |
| chrUn | 59503950 | 59507610 | 3661 CarSat1 | red    | na |
| chrUn | 59507625 | 59507752 | 128 Carsat2  | orange | na |
| chrUn | 59507640 | 59508617 | 978 CarSat1  | red    | na |
| chrUn | 59508638 | 59509356 | 719 CarSat1  | red    | na |
| chrUn | 59509381 | 59510342 | 962 CarSat1  | red    | na |
| chrUn | 59510363 | 59511300 | 938 CarSat1  | red    | na |
| chrUn | 59511315 | 59511441 | 127 Carsat2  | orange | na |
| chrUn | 59511330 | 59512775 | 1446 CarSat1 | red    | na |
| chrUn | 59512790 | 59512916 | 127 Carsat2  | orange | na |
| chrUn | 59512805 | 59516835 | 4031 CarSat1 | red    | na |
| chrUn | 59545227 | 59545927 | 701 CarSat1  | red    | na |

|       |          |          |      |         |     |    |
|-------|----------|----------|------|---------|-----|----|
| chrUn | 59546123 | 59546732 | 610  | CarSat1 | red | na |
| chrUn | 59546749 | 59549671 | 2923 | CarSat1 | red | na |
| chrUn | 59549692 | 59551141 | 1450 | CarSat1 | red | na |
| chrUn | 59551168 | 59551864 | 697  | CarSat1 | red | na |
| chrUn | 59551906 | 59553605 | 1700 | CarSat1 | red | na |
| chrUn | 59553621 | 59555077 | 1457 | CarSat1 | red | na |
| chrUn | 59555093 | 59555815 | 723  | CarSat1 | red | na |
| chrUn | 59555831 | 59556551 | 721  | CarSat1 | red | na |
| chrUn | 59556567 | 59557500 | 934  | CarSat1 | red | na |
| chrUn | 59557530 | 59558841 | 1312 | CarSat1 | red | na |
| chrUn | 59607614 | 59608518 | 905  | CarSat1 | red | na |
| chrUn | 59608704 | 59608850 | 147  | CarSat1 | red | na |
| chrUn | 59608888 | 59609369 | 482  | CarSat1 | red | na |
| chrUn | 59609394 | 59610330 | 937  | CarSat1 | red | na |
| chrUn | 59610360 | 59611066 | 707  | CarSat1 | red | na |
| chrUn | 59611096 | 59611802 | 707  | CarSat1 | red | na |
| chrUn | 59611832 | 59612394 | 563  | CarSat1 | red | na |
| chrUn | 59612581 | 59612727 | 147  | CarSat1 | red | na |
| chrUn | 59612765 | 59614063 | 1299 | CarSat1 | red | na |
| chrUn | 59614249 | 59614403 | 155  | CarSat1 | red | na |
| chrUn | 59614433 | 59614995 | 563  | CarSat1 | red | na |
| chrUn | 59615181 | 59615424 | 244  | CarSat1 | red | na |
| chrUn | 59616878 | 59617022 | 145  | CarSat1 | red | na |
| chrUn | 59617220 | 59617413 | 194  | CarSat1 | red | na |
| chrUn | 59617430 | 59617880 | 451  | CarSat1 | red | na |
| chrUn | 59617910 | 59618472 | 563  | CarSat1 | red | na |
| chrUn | 59618658 | 59618812 | 155  | CarSat1 | red | na |
| chrUn | 59618842 | 59619820 | 979  | CarSat1 | red | na |
| chrUn | 59619847 | 59621763 | 1917 | CarSat1 | red | na |
| chrUn | 59621793 | 59622355 | 563  | CarSat1 | red | na |
| chrUn | 59622538 | 59622692 | 155  | CarSat1 | red | na |
| chrUn | 59622722 | 59624689 | 1968 | CarSat1 | red | na |
| chrUn | 59624705 | 59625427 | 723  | CarSat1 | red | na |
| chrUn | 59625443 | 59625903 | 461  | CarSat1 | red | na |
| chrUn | 59625930 | 59626643 | 714  | CarSat1 | red | na |
| chrUn | 59626670 | 59627380 | 711  | CarSat1 | red | na |
| chrUn | 59627407 | 59628077 | 671  | CarSat1 | red | na |
| chrUn | 59670147 | 59671362 | 1216 | CarSat1 | red | na |
| chrUn | 59671387 | 59672107 | 721  | CarSat1 | red | na |
| chrUn | 59672124 | 59672840 | 717  | CarSat1 | red | na |
| chrUn | 59672856 | 59673564 | 709  | CarSat1 | red | na |
| chrUn | 59673589 | 59674308 | 720  | CarSat1 | red | na |

|       |          |          |              |        |    |
|-------|----------|----------|--------------|--------|----|
| chrUn | 59674325 | 59674859 | 535 CarSat1  | red    | na |
| chrUn | 59675033 | 59675604 | 572 CarSat1  | red    | na |
| chrUn | 59675648 | 59676217 | 570 SAT1_CF  | blue   | na |
| chrUn | 59676257 | 59677631 | 1375 SAT1_CF | blue   | na |
| chrUn | 59677644 | 59678991 | 1348 SAT1_CF | blue   | na |
| chrUn | 59679077 | 59681293 | 2217 SAT1_CF | blue   | na |
| chrUn | 59681326 | 59681879 | 554 SAT1_CF  | blue   | na |
| chrUn | 59681958 | 59682778 | 821 SAT1_CF  | blue   | na |
| chrUn | 59682821 | 59682929 | 109 SAT1_CF  | blue   | na |
| chrUn | 59682955 | 59684170 | 1216 SAT1_CF | blue   | na |
| chrUn | 59684182 | 59684291 | 110 SAT1_CF  | blue   | na |
| chrUn | 59684311 | 59685514 | 1204 SAT1_CF | blue   | na |
| chrUn | 59685558 | 59686384 | 827 SAT1_CF  | blue   | na |
| chrUn | 59687781 | 59689572 | 1792 SAT1_CF | blue   | na |
| chrUn | 59690589 | 59691458 | 870 CarSat1  | red    | na |
| chrUn | 59691473 | 59691600 | 128 Carsat2  | orange | na |
| chrUn | 59691488 | 59692936 | 1449 CarSat1 | red    | na |
| chrUn | 59692951 | 59693078 | 128 Carsat2  | orange | na |
| chrUn | 59692966 | 59693671 | 706 CarSat1  | red    | na |
| chrUn | 59693686 | 59693809 | 124 Carsat2  | orange | na |
| chrUn | 59693701 | 59694412 | 712 CarSat1  | red    | na |
| chrUn | 59694427 | 59694554 | 128 Carsat2  | orange | na |
| chrUn | 59694442 | 59695148 | 707 CarSat1  | red    | na |
| chrUn | 59695163 | 59695289 | 127 Carsat2  | orange | na |
| chrUn | 59695178 | 59695884 | 707 CarSat1  | red    | na |
| chrUn | 59695899 | 59696022 | 124 Carsat2  | orange | na |
| chrUn | 59695914 | 59696399 | 486 CarSat1  | red    | na |
| chrUn | 59696432 | 59697366 | 935 CarSat1  | red    | na |
| chrUn | 59697381 | 59697508 | 128 Carsat2  | orange | na |
| chrUn | 59697396 | 59698103 | 708 CarSat1  | red    | na |
| chrUn | 59698118 | 59698244 | 127 Carsat2  | orange | na |
| chrUn | 59698133 | 59698840 | 708 CarSat1  | red    | na |
| chrUn | 59699339 | 59700315 | 977 CarSat1  | red    | na |
| chrUn | 59700330 | 59700457 | 128 Carsat2  | orange | na |
| chrUn | 59700345 | 59701052 | 708 CarSat1  | red    | na |
| chrUn | 59701067 | 59701193 | 127 Carsat2  | orange | na |
| chrUn | 59701082 | 59701793 | 712 CarSat1  | red    | na |
| chrUn | 59701823 | 59702530 | 708 CarSat1  | red    | na |
| chrUn | 59702545 | 59702670 | 126 Carsat2  | orange | na |
| chrUn | 59702560 | 59703270 | 711 CarSat1  | red    | na |
| chrUn | 59703300 | 59703786 | 487 CarSat1  | red    | na |
| chrUn | 59703821 | 59704749 | 929 CarSat1  | red    | na |

|       |          |          |      |         |        |    |
|-------|----------|----------|------|---------|--------|----|
| chrUn | 59704764 | 59704890 | 127  | Carsat2 | orange | na |
| chrUn | 59704779 | 59705486 | 708  | CarSat1 | red    | na |
| chrUn | 59705501 | 59705628 | 128  | Carsat2 | orange | na |
| chrUn | 59705516 | 59706223 | 708  | CarSat1 | red    | na |
| chrUn | 59706238 | 59706364 | 127  | Carsat2 | orange | na |
| chrUn | 59706253 | 59706960 | 708  | CarSat1 | red    | na |
| chrUn | 59706975 | 59707102 | 128  | Carsat2 | orange | na |
| chrUn | 59706990 | 59707697 | 708  | CarSat1 | red    | na |
| chrUn | 59707727 | 59708433 | 707  | CarSat1 | red    | na |
| chrUn | 59708448 | 59708574 | 127  | Carsat2 | orange | na |
| chrUn | 59708463 | 59708948 | 486  | CarSat1 | red    | na |
| chrUn | 59708982 | 59709911 | 930  | CarSat1 | red    | na |
| chrUn | 59709941 | 59710532 | 592  | CarSat1 | red    | na |
| chrUn | 59770720 | 59772253 | 1534 | CarSat1 | red    | na |
| chrUn | 59772268 | 59772391 | 124  | Carsat2 | orange | na |
| chrUn | 59772283 | 59772989 | 707  | CarSat1 | red    | na |
| chrUn | 59773019 | 59773504 | 486  | CarSat1 | red    | na |
| chrUn | 59773537 | 59774468 | 932  | CarSat1 | red    | na |
| chrUn | 59774483 | 59774610 | 128  | Carsat2 | orange | na |
| chrUn | 59774498 | 59775205 | 708  | CarSat1 | red    | na |
| chrUn | 59775220 | 59775347 | 128  | Carsat2 | orange | na |
| chrUn | 59775235 | 59776216 | 982  | CarSat1 | red    | na |
| chrUn | 59776241 | 59777427 | 1187 | CarSat1 | red    | na |
| chrUn | 59777442 | 59777568 | 127  | Carsat2 | orange | na |
| chrUn | 59777457 | 59778164 | 708  | CarSat1 | red    | na |
| chrUn | 59778194 | 59778895 | 702  | CarSat1 | red    | na |
| chrUn | 59778925 | 59779630 | 706  | CarSat1 | red    | na |
| chrUn | 59779675 | 59780367 | 693  | CarSat1 | red    | na |
| chrUn | 59780401 | 59781105 | 705  | CarSat1 | red    | na |
| chrUn | 59781135 | 59781839 | 705  | CarSat1 | red    | na |
| chrUn | 59781869 | 59782573 | 705  | CarSat1 | red    | na |
| chrUn | 59782603 | 59783307 | 705  | CarSat1 | red    | na |
| chrUn | 59783339 | 59784775 | 1437 | CarSat1 | red    | na |
| chrUn | 59784805 | 59785509 | 705  | CarSat1 | red    | na |
| chrUn | 59785539 | 59786517 | 979  | CarSat1 | red    | na |
| chrUn | 59786538 | 59786975 | 438  | CarSat1 | red    | na |
| chrUn | 59787009 | 59787710 | 702  | CarSat1 | red    | na |
| chrUn | 59787744 | 59789183 | 1440 | CarSat1 | red    | na |
| chrUn | 59789213 | 59790066 | 854  | CarSat1 | red    | na |
| chrUn | 59866046 | 59866590 | 545  | CarSat1 | red    | na |
| chrUn | 59866615 | 59869049 | 2435 | CarSat1 | red    | na |
| chrUn | 59869076 | 59871015 | 1940 | CarSat1 | red    | na |

|       |          |          |      |         |      |    |
|-------|----------|----------|------|---------|------|----|
| chrUn | 59871031 | 59871989 | 959  | CarSat1 | red  | na |
| chrUn | 59872016 | 59873728 | 1713 | CarSat1 | red  | na |
| chrUn | 59873758 | 59874469 | 712  | CarSat1 | red  | na |
| chrUn | 59874499 | 59878156 | 3658 | CarSat1 | red  | na |
| chrUn | 59878173 | 59880381 | 2209 | CarSat1 | red  | na |
| chrUn | 59880397 | 59881104 | 708  | CarSat1 | red  | na |
| chrUn | 59881134 | 59882580 | 1447 | CarSat1 | red  | na |
| chrUn | 59882610 | 59884066 | 1457 | CarSat1 | red  | na |
| chrUn | 59884081 | 59885375 | 1295 | CarSat1 | red  | na |
| chrUn | 59886380 | 59887026 | 647  | SAT1_CF | blue | na |
| chrUn | 59887044 | 59888808 | 1765 | SAT1_CF | blue | na |
| chrUn | 59888829 | 59890058 | 1230 | SAT1_CF | blue | na |
| chrUn | 59890099 | 59891793 | 1695 | SAT1_CF | blue | na |
| chrUn | 59891972 | 59892156 | 185  | SAT1_CF | blue | na |
| chrUn | 59892177 | 59892696 | 520  | SAT1_CF | blue | na |
| chrUn | 59892709 | 59892814 | 106  | SAT1_CF | blue | na |
| chrUn | 59892837 | 59894109 | 1273 | SAT1_CF | blue | na |
| chrUn | 59894124 | 59894260 | 137  | SAT1_CF | blue | na |
| chrUn | 59894326 | 59894828 | 503  | SAT1_CF | blue | na |
| chrUn | 59894841 | 59894947 | 107  | SAT1_CF | blue | na |
| chrUn | 59894969 | 59895525 | 557  | SAT1_CF | blue | na |
| chrUn | 59895539 | 59896906 | 1368 | SAT1_CF | blue | na |
| chrUn | 59896949 | 59897917 | 969  | SAT1_CF | blue | na |
| chrUn | 59897987 | 59898700 | 714  | SAT1_CF | blue | na |
| chrUn | 59898714 | 59899235 | 522  | SAT1_CF | blue | na |
| chrUn | 59899269 | 59899648 | 380  | SAT1_CF | blue | na |
| chrUn | 59899688 | 59900189 | 502  | SAT1_CF | blue | na |
| chrUn | 59900202 | 59900308 | 107  | SAT1_CF | blue | na |
| chrUn | 59900330 | 59900884 | 555  | SAT1_CF | blue | na |
| chrUn | 59900896 | 59902344 | 1449 | SAT1_CF | blue | na |
| chrUn | 59902390 | 59903018 | 629  | SAT1_CF | blue | na |
| chrUn | 59903045 | 59903608 | 564  | SAT1_CF | blue | na |
| chrUn | 59903688 | 59903882 | 195  | SAT1_CF | blue | na |
| chrUn | 59903908 | 59904903 | 996  | SAT1_CF | blue | na |
| chrUn | 59904923 | 59905689 | 767  | SAT1_CF | blue | na |
| chrUn | 59936154 | 59936828 | 675  | CarSat1 | red  | na |
| chrUn | 59936849 | 59938045 | 1197 | CarSat1 | red  | na |
| chrUn | 59938070 | 59939037 | 968  | CarSat1 | red  | na |
| chrUn | 59939058 | 59939527 | 470  | CarSat1 | red  | na |
| chrUn | 59939552 | 59940254 | 703  | CarSat1 | red  | na |
| chrUn | 59940279 | 59941731 | 1453 | CarSat1 | red  | na |
| chrUn | 59941756 | 59942723 | 968  | CarSat1 | red  | na |

|       |          |          |      |         |      |    |
|-------|----------|----------|------|---------|------|----|
| chrUn | 59942744 | 59944460 | 1717 | CarSat1 | red  | na |
| chrUn | 59944490 | 59944929 | 440  | CarSat1 | red  | na |
| chrUn | 59944956 | 59945934 | 979  | CarSat1 | red  | na |
| chrUn | 59945964 | 59946409 | 446  | CarSat1 | red  | na |
| chrUn | 59946430 | 59948161 | 1732 | CarSat1 | red  | na |
| chrUn | 59948176 | 59948881 | 706  | CarSat1 | red  | na |
| chrUn | 59948911 | 59951561 | 2651 | CarSat1 | red  | na |
| chrUn | 59951589 | 59952568 | 980  | CarSat1 | red  | na |
| chrUn | 59952598 | 59954512 | 1915 | CarSat1 | red  | na |
| chrUn | 59954539 | 59955424 | 886  | CarSat1 | red  | na |
| chrUn | 59956427 | 59956557 | 131  | SAT1_CF | blue | na |
| chrUn | 59956580 | 59956686 | 107  | SAT1_CF | blue | na |
| chrUn | 59956699 | 59957200 | 502  | SAT1_CF | blue | na |
| chrUn | 59957240 | 59958264 | 1025 | SAT1_CF | blue | na |
| chrUn | 59959298 | 59959909 | 612  | SAT1_CF | blue | na |
| chrUn | 59959922 | 59961232 | 1311 | SAT1_CF | blue | na |
| chrUn | 59961276 | 59962784 | 1509 | SAT1_CF | blue | na |
| chrUn | 59964936 | 59965750 | 815  | SAT1_CF | blue | na |
| chrUn | 59965792 | 59966408 | 617  | SAT1_CF | blue | na |
| chrUn | 59968551 | 59969110 | 560  | SAT1_CF | blue | na |
| chrUn | 59969142 | 59969648 | 507  | SAT1_CF | blue | na |
| chrUn | 59969696 | 59970433 | 738  | SAT1_CF | blue | na |
| chrUn | 59972170 | 59973090 | 921  | SAT1_CF | blue | na |
| chrUn | 59973132 | 59973656 | 525  | SAT1_CF | blue | na |
| chrUn | 59973670 | 59973743 | 74   | SAT1_CF | blue | na |
| chrUn | 59975759 | 59976250 | 492  | SAT1_CF | blue | na |
| chrUn | 59976303 | 59977568 | 1266 | SAT1_CF | blue | na |
| chrUn | 59977605 | 59978148 | 544  | SAT1_CF | blue | na |
| chrUn | 59978190 | 59979621 | 1432 | SAT1_CF | blue | na |
| chrUn | 59979641 | 59979749 | 109  | SAT1_CF | blue | na |
| chrUn | 59979762 | 59980282 | 521  | SAT1_CF | blue | na |
| chrUn | 59980308 | 59980463 | 156  | SAT1_CF | blue | na |
| chrUn | 59982113 | 59983641 | 1529 | SAT1_CF | blue | na |
| chrUn | 59983653 | 59984205 | 553  | SAT1_CF | blue | na |
| chrUn | 59984224 | 59984442 | 219  | SAT1_CF | blue | na |
| chrUn | 59984486 | 59985076 | 591  | SAT1_CF | blue | na |
| chrUn | 59987600 | 59988308 | 709  | SAT1_CF | blue | na |
| chrUn | 59988360 | 59988598 | 239  | SAT1_CF | blue | na |
| chrUn | 60009868 | 60011205 | 1338 | CarSat1 | red  | na |
| chrUn | 60011235 | 60011681 | 447  | CarSat1 | red  | na |
| chrUn | 60011702 | 60012418 | 717  | CarSat1 | red  | na |
| chrUn | 60012439 | 60013417 | 979  | CarSat1 | red  | na |

|       |          |          |      |         |        |    |
|-------|----------|----------|------|---------|--------|----|
| chrUn | 60013447 | 60013887 | 441  | CarSat1 | red    | na |
| chrUn | 60013914 | 60015118 | 1205 | CarSat1 | red    | na |
| chrUn | 60015143 | 60016095 | 953  | CarSat1 | red    | na |
| chrUn | 60016125 | 60017329 | 1205 | CarSat1 | red    | na |
| chrUn | 60017354 | 60019530 | 2177 | CarSat1 | red    | na |
| chrUn | 60019555 | 60021005 | 1451 | CarSat1 | red    | na |
| chrUn | 60021039 | 60021992 | 954  | CarSat1 | red    | na |
| chrUn | 60022019 | 60024472 | 2454 | CarSat1 | red    | na |
| chrUn | 60024502 | 60025438 | 937  | CarSat1 | red    | na |
| chrUn | 60025463 | 60026683 | 1221 | CarSat1 | red    | na |
| chrUn | 60026713 | 60027159 | 447  | CarSat1 | red    | na |
| chrUn | 60027178 | 60027784 | 607  | CarSat1 | red    | na |
| chrUn | 60027970 | 60029187 | 1218 | CarSat1 | red    | na |
| chrUn | 60033357 | 60034120 | 764  | SAT1_CF | blue   | na |
| chrUn | 60034132 | 60036270 | 2139 | SAT1_CF | blue   | na |
| chrUn | 60036300 | 60036788 | 489  | SAT1_CF | blue   | na |
| chrUn | 60036840 | 60036997 | 158  | SAT1_CF | blue   | na |
| chrUn | 60037042 | 60037533 | 492  | SAT1_CF | blue   | na |
| chrUn | 60037550 | 60038235 | 686  | SAT1_CF | blue   | na |
| chrUn | 60038246 | 60039517 | 1272 | SAT1_CF | blue   | na |
| chrUn | 60039559 | 60040339 | 781  | SAT1_CF | blue   | na |
| chrUn | 60040383 | 60042250 | 1868 | SAT1_CF | blue   | na |
| chrUn | 60042267 | 60043601 | 1335 | SAT1_CF | blue   | na |
| chrUn | 60043664 | 60044134 | 471  | SAT1_CF | blue   | na |
| chrUn | 60044154 | 60044260 | 107  | SAT1_CF | blue   | na |
| chrUn | 60044283 | 60044836 | 554  | SAT1_CF | blue   | na |
| chrUn | 60044848 | 60044970 | 123  | SAT1_CF | blue   | na |
| chrUn | 60044991 | 60045386 | 396  | SAT1_CF | blue   | na |
| chrUn | 60045400 | 60046543 | 1144 | SAT1_CF | blue   | na |
| chrUn | 60046583 | 60048319 | 1737 | SAT1_CF | blue   | na |
| chrUn | 60048384 | 60048520 | 137  | SAT1_CF | blue   | na |
| chrUn | 60048587 | 60049396 | 810  | SAT1_CF | blue   | na |
| chrUn | 60108808 | 60109986 | 1179 | Sat2CF  | purple | na |
| chrUn | 60138578 | 60139247 | 670  | Sat54CF | na     | na |
| chrUn | 60139493 | 60140215 | 723  | Sat54CF | na     | na |
| chrUn | 60140301 | 60140840 | 540  | Sat54CF | na     | na |
| chrUn | 60141091 | 60141283 | 193  | Sat54CF | na     | na |
| chrUn | 60156253 | 60157217 | 965  | Sat90CF | na     | na |
| chrUn | 60156365 | 60157365 | 1001 | Sat90CF | na     | na |
| chrUn | 60156489 | 60157514 | 1026 | Sat90CF | na     | na |
| chrUn | 60156715 | 60157497 | 783  | Sat90CF | na     | na |
| chrUn | 60158608 | 60162439 | 3832 | CarSat1 | red    | na |

|       |          |          |      |         |        |    |
|-------|----------|----------|------|---------|--------|----|
| chrUn | 60162463 | 60163667 | 1205 | CarSat1 | red    | na |
| chrUn | 60163688 | 60164649 | 962  | CarSat1 | red    | na |
| chrUn | 60164673 | 60165385 | 713  | CarSat1 | red    | na |
| chrUn | 60165409 | 60166343 | 935  | CarSat1 | red    | na |
| chrUn | 60166355 | 60166484 | 130  | Carsat2 | orange | na |
| chrUn | 60166373 | 60167592 | 1220 | CarSat1 | red    | na |
| chrUn | 60167616 | 60168328 | 713  | CarSat1 | red    | na |
| chrUn | 60168352 | 60169286 | 935  | CarSat1 | red    | na |
| chrUn | 60169316 | 60170024 | 709  | CarSat1 | red    | na |
| chrUn | 60170054 | 60170761 | 708  | CarSat1 | red    | na |
| chrUn | 60170791 | 60171501 | 711  | CarSat1 | red    | na |
| chrUn | 60171533 | 60173504 | 1972 | CarSat1 | red    | na |
| chrUn | 60173520 | 60175195 | 1676 | CarSat1 | red    | na |
| chrUn | 60175225 | 60175711 | 487  | CarSat1 | red    | na |
| chrUn | 60175735 | 60177761 | 2027 | CarSat1 | red    | na |
| chrUn | 60178925 | 60179208 | 284  | CarSat1 | red    | na |
| chrUn | 60319001 | 60319284 | 284  | Sat2CF  | purple | na |
| chrUn | 60319011 | 60319264 | 254  | Sat2CF  | purple | na |
| chrUn | 60319130 | 60319292 | 163  | Sat2CF  | purple | na |
| chrUn | 60327547 | 60328712 | 1166 | CarSat1 | red    | na |
| chrUn | 60328739 | 60329208 | 470  | CarSat1 | red    | na |
| chrUn | 60329224 | 60330187 | 964  | CarSat1 | red    | na |
| chrUn | 60330214 | 60330925 | 712  | CarSat1 | red    | na |
| chrUn | 60330952 | 60331662 | 711  | CarSat1 | red    | na |
| chrUn | 60331689 | 60332397 | 709  | CarSat1 | red    | na |
| chrUn | 60332424 | 60333134 | 711  | CarSat1 | red    | na |
| chrUn | 60333161 | 60335345 | 2185 | CarSat1 | red    | na |
| chrUn | 60335372 | 60336083 | 712  | CarSat1 | red    | na |
| chrUn | 60336110 | 60336820 | 711  | CarSat1 | red    | na |
| chrUn | 60336847 | 60337557 | 711  | CarSat1 | red    | na |
| chrUn | 60337584 | 60338294 | 711  | CarSat1 | red    | na |
| chrUn | 60338321 | 60339515 | 1195 | CarSat1 | red    | na |
| chrUn | 60339540 | 60340503 | 964  | CarSat1 | red    | na |
| chrUn | 60340530 | 60342716 | 2187 | CarSat1 | red    | na |
| chrUn | 60342743 | 60346577 | 3835 | CarSat1 | red    | na |
| chrUn | 60415103 | 60415175 | 73   | Sat10CF | na     | na |
| chrUn | 60415113 | 60415175 | 63   | Sat10CF | na     | na |
| chrUn | 60416932 | 60417219 | 288  | Sat10CF | na     | na |
| chrUn | 60416956 | 60417136 | 181  | Sat10CF | na     | na |
| chrUn | 60418553 | 60419154 | 602  | Sat10CF | na     | na |
| chrUn | 60418815 | 60419174 | 360  | Sat10CF | na     | na |
| chrUn | 60418553 | 60419154 | 602  | Sat10CF | na     | na |



|       |          |          |              |        |    |
|-------|----------|----------|--------------|--------|----|
| chrUn | 60418815 | 60419174 | 360 Sat10CF  | na     | na |
| chrUn | 60492185 | 60493094 | 910 CarSat1  | red    | na |
| chrUn | 60493159 | 60494678 | 1520 CarSat1 | red    | na |
| chrUn | 60494697 | 60495876 | 1180 CarSat1 | red    | na |
| chrUn | 60495881 | 60496881 | 1001 SAT1_CF | blue   | na |
| chrUn | 60496893 | 60497115 | 223 SAT1_CF  | blue   | na |
| chrUn | 60497131 | 60497654 | 524 SAT1_CF  | blue   | na |
| chrUn | 60497676 | 60500837 | 3162 SAT1_CF | blue   | na |
| chrUn | 60500832 | 60501713 | 882 CarSat1  | red    | na |
| chrUn | 60501745 | 60502991 | 1247 CarSat1 | red    | na |
| chrUn | 60503012 | 60503513 | 502 CarSat1  | red    | na |
| chrUn | 60503703 | 60504800 | 1098 CarSat1 | red    | na |
| chrUn | 60505767 | 60506180 | 414 CarSat1  | red    | na |
| chrUn | 60508329 | 60508966 | 638 CarSat1  | red    | na |
| chrUn | 60508978 | 60510175 | 1198 CarSat1 | red    | na |
| chrUn | 60510190 | 60510317 | 128 Carsat2  | orange | na |
| chrUn | 60510205 | 60510917 | 713 CarSat1  | red    | na |
| chrUn | 60510947 | 60511920 | 974 CarSat1  | red    | na |
| chrUn | 60511950 | 60512389 | 440 CarSat1  | red    | na |
| chrUn | 60512404 | 60512530 | 127 Carsat2  | orange | na |
| chrUn | 60512419 | 60513866 | 1448 CarSat1 | red    | na |
| chrUn | 60513881 | 60514007 | 127 Carsat2  | orange | na |
| chrUn | 60513896 | 60514607 | 712 CarSat1  | red    | na |
| chrUn | 60514622 | 60514749 | 128 Carsat2  | orange | na |
| chrUn | 60514638 | 60516827 | 2190 CarSat1 | red    | na |
| chrUn | 60516858 | 60517568 | 711 CarSat1  | red    | na |
| chrUn | 60517598 | 60518310 | 713 CarSat1  | red    | na |
| chrUn | 60518340 | 60519047 | 708 CarSat1  | red    | na |
| chrUn | 60519062 | 60519188 | 127 Carsat2  | orange | na |
| chrUn | 60519077 | 60519788 | 712 CarSat1  | red    | na |
| chrUn | 60519818 | 60521716 | 1899 CarSat1 | red    | na |
| chrUn | 60521850 | 60522866 | 1017 CarSat1 | red    | na |
| chrUn | 60522903 | 60523388 | 486 CarSat1  | red    | na |
| chrUn | 60523422 | 60524346 | 925 CarSat1  | red    | na |
| chrUn | 60524361 | 60524487 | 127 Carsat2  | orange | na |
| chrUn | 60524376 | 60524860 | 485 CarSat1  | red    | na |
| chrUn | 60524894 | 60525819 | 926 CarSat1  | red    | na |
| chrUn | 60525834 | 60525949 | 116 Carsat2  | orange | na |
| chrUn | 60525849 | 60527220 | 1372 CarSat1 | red    | na |
| chrUn | 60550234 | 60553487 | 3254 CarSat1 | red    | na |
| chrUn | 60553520 | 60554019 | 500 CarSat1  | red    | na |
| chrUn | 60554034 | 60554756 | 723 CarSat1  | red    | na |

|       |          |          |      |         |      |    |
|-------|----------|----------|------|---------|------|----|
| chrUn | 60554771 | 60556432 | 1662 | CarSat1 | red  | na |
| chrUn | 60556465 | 60559923 | 3459 | CarSat1 | red  | na |
| chrUn | 60559938 | 60560645 | 708  | CarSat1 | red  | na |
| chrUn | 60560675 | 60561398 | 724  | CarSat1 | red  | na |
| chrUn | 60561413 | 60563596 | 2184 | CarSat1 | red  | na |
| chrUn | 60563626 | 60564334 | 709  | CarSat1 | red  | na |
| chrUn | 60564364 | 60565069 | 706  | CarSat1 | red  | na |
| chrUn | 60565099 | 60566558 | 1460 | CarSat1 | red  | na |
| chrUn | 60566573 | 60569151 | 2579 | CarSat1 | red  | na |
| chrUn | 60570156 | 60573571 | 3416 | CarSat1 | red  | na |
| chrUn | 60575146 | 60584424 | 9279 | CarSat1 | red  | na |
| chrUn | 60584457 | 60587370 | 2914 | CarSat1 | red  | na |
| chrUn | 60587394 | 60588107 | 714  | CarSat1 | red  | na |
| chrUn | 60588131 | 60588766 | 636  | CarSat1 | red  | na |
| chrUn | 60589130 | 60590987 | 1858 | CarSat1 | red  | na |
| chrUn | 60591999 | 60592624 | 626  | CarSat1 | red  | na |
| chrUn | 60592640 | 60594838 | 2199 | CarSat1 | red  | na |
| chrUn | 60594854 | 60597050 | 2197 | CarSat1 | red  | na |
| chrUn | 60597066 | 60597535 | 470  | CarSat1 | red  | na |
| chrUn | 60597562 | 60598272 | 711  | CarSat1 | red  | na |
| chrUn | 60598299 | 60599748 | 1450 | CarSat1 | red  | na |
| chrUn | 60599775 | 60600485 | 711  | CarSat1 | red  | na |
| chrUn | 60600512 | 60601475 | 964  | CarSat1 | red  | na |
| chrUn | 60601491 | 60602213 | 723  | CarSat1 | red  | na |
| chrUn | 60602229 | 60603687 | 1459 | CarSat1 | red  | na |
| chrUn | 60603712 | 60604905 | 1194 | CarSat1 | red  | na |
| chrUn | 60604932 | 60605894 | 963  | CarSat1 | red  | na |
| chrUn | 60605910 | 60607113 | 1204 | CarSat1 | red  | na |
| chrUn | 60607141 | 60608103 | 963  | CarSat1 | red  | na |
| chrUn | 60608119 | 60609577 | 1459 | CarSat1 | red  | na |
| chrUn | 60609593 | 60610315 | 723  | CarSat1 | red  | na |
| chrUn | 60610331 | 60610895 | 565  | CarSat1 | red  | na |
| chrUn | 60611912 | 60612414 | 503  | SAT1_CF | blue | na |
| chrUn | 60612454 | 60612948 | 495  | SAT1_CF | blue | na |
| chrUn | 60612968 | 60615321 | 2354 | SAT1_CF | blue | na |
| chrUn | 60615338 | 60616018 | 681  | SAT1_CF | blue | na |
| chrUn | 60616030 | 60617487 | 1458 | SAT1_CF | blue | na |
| chrUn | 60617515 | 60618660 | 1146 | SAT1_CF | blue | na |
| chrUn | 60618693 | 60618851 | 159  | SAT1_CF | blue | na |
| chrUn | 60618876 | 60619396 | 521  | SAT1_CF | blue | na |
| chrUn | 60619414 | 60620104 | 691  | SAT1_CF | blue | na |
| chrUn | 60620613 | 60622056 | 1444 | SAT1_CF | blue | na |

|       |          |          |              |        |    |
|-------|----------|----------|--------------|--------|----|
| chrUn | 60622068 | 60623231 | 1164 SAT1_CF | blue   | na |
| chrUn | 60623282 | 60623476 | 195 SAT1_CF  | blue   | na |
| chrUn | 60623732 | 60624244 | 513 SAT1_CF  | blue   | na |
| chrUn | 60624468 | 60624602 | 135 SAT1_CF  | blue   | na |
| chrUn | 60624689 | 60626891 | 2203 SAT1_CF | blue   | na |
| chrUn | 60627785 | 60628321 | 537 SAT1_CF  | blue   | na |
| chrUn | 60628338 | 60629016 | 679 SAT1_CF  | blue   | na |
| chrUn | 60629414 | 60629824 | 411 SAT1_CF  | blue   | na |
| chrUn | 60630006 | 60630468 | 463 SAT1_CF  | blue   | na |
| chrUn | 60630963 | 60631172 | 210 SAT1_CF  | blue   | na |
| chrUn | 60631185 | 60631290 | 106 SAT1_CF  | blue   | na |
| chrUn | 60631314 | 60632132 | 819 SAT1_CF  | blue   | na |
| chrUn | 60635322 | 60635700 | 379 SAT1_CF  | blue   | na |
| chrUn | 60635718 | 60636416 | 699 SAT1_CF  | blue   | na |
| chrUn | 60640994 | 60641873 | 880 Sat2CF   | purple | na |
| chrUn | 60641083 | 60642159 | 1077 Sat2CF  | purple | na |
| chrUn | 60642036 | 60642184 | 149 Sat2CF   | purple | na |
| chrUn | 60690945 | 60691902 | 958 CarSat1  | red    | na |
| chrUn | 60692062 | 60693501 | 1440 CarSat1 | red    | na |
| chrUn | 60699410 | 60701811 | 2402 SAT1_CF | blue   | na |
| chrUn | 60701823 | 60702140 | 318 SAT1_CF  | blue   | na |
| chrUn | 60702215 | 60702782 | 568 SAT1_CF  | blue   | na |
| chrUn | 60702801 | 60703318 | 518 SAT1_CF  | blue   | na |
| chrUn | 60703388 | 60703905 | 518 SAT1_CF  | blue   | na |
| chrUn | 60703992 | 60705623 | 1632 SAT1_CF | blue   | na |
| chrUn | 60705637 | 60707004 | 1368 SAT1_CF | blue   | na |
| chrUn | 60707050 | 60708703 | 1654 SAT1_CF | blue   | na |
| chrUn | 60708714 | 60709031 | 318 SAT1_CF  | blue   | na |
| chrUn | 60709104 | 60710282 | 1179 SAT1_CF | blue   | na |
| chrUn | 60710294 | 60710969 | 676 SAT1_CF  | blue   | na |
| chrUn | 60711014 | 60711662 | 649 SAT1_CF  | blue   | na |
| chrUn | 60711698 | 60712233 | 536 SAT1_CF  | blue   | na |
| chrUn | 60712314 | 60712837 | 524 SAT1_CF  | blue   | na |
| chrUn | 60712901 | 60713447 | 547 SAT1_CF  | blue   | na |
| chrUn | 60713460 | 60715333 | 1874 SAT1_CF | blue   | na |
| chrUn | 60715361 | 60715518 | 158 SAT1_CF  | blue   | na |
| chrUn | 60715563 | 60716164 | 602 SAT1_CF  | blue   | na |
| chrUn | 60716191 | 60716736 | 546 SAT1_CF  | blue   | na |
| chrUn | 60716780 | 60718199 | 1420 SAT1_CF | blue   | na |
| chrUn | 60755410 | 60756222 | 813 Sat2CF   | purple | na |
| chrUn | 60755909 | 60756296 | 388 Sat2CF   | purple | na |
| chrUn | 60758832 | 60760357 | 1526 CarSat1 | red    | na |

|       |          |          |      |         |        |    |
|-------|----------|----------|------|---------|--------|----|
| chrUn | 60760387 | 60761833 | 1447 | CarSat1 | red    | na |
| chrUn | 60761863 | 60762571 | 709  | CarSat1 | red    | na |
| chrUn | 60762601 | 60763821 | 1221 | CarSat1 | red    | na |
| chrUn | 60763846 | 60765508 | 1663 | CarSat1 | red    | na |
| chrUn | 60765545 | 60766525 | 981  | CarSat1 | red    | na |
| chrUn | 60767552 | 60768703 | 1152 | CarSat1 | red    | na |
| chrUn | 60768773 | 60769044 | 272  | CarSat1 | red    | na |
| chrUn | 60770282 | 60772683 | 2402 | CarSat1 | red    | na |
| chrUn | 60772713 | 60773421 | 709  | CarSat1 | red    | na |
| chrUn | 60773451 | 60776373 | 2923 | CarSat1 | red    | na |
| chrUn | 60776403 | 60777111 | 709  | CarSat1 | red    | na |
| chrUn | 60777141 | 60779849 | 2709 | CarSat1 | red    | na |
| chrUn | 60802675 | 60803305 | 631  | CarSat1 | red    | na |
| chrUn | 60803338 | 60803838 | 501  | CarSat1 | red    | na |
| chrUn | 60803853 | 60805314 | 1462 | CarSat1 | red    | na |
| chrUn | 60805329 | 60806772 | 1444 | CarSat1 | red    | na |
| chrUn | 60806803 | 60807523 | 721  | CarSat1 | red    | na |
| chrUn | 60807539 | 60809203 | 1665 | CarSat1 | red    | na |
| chrUn | 60809236 | 60809721 | 486  | CarSat1 | red    | na |
| chrUn | 60809751 | 60810472 | 722  | CarSat1 | red    | na |
| chrUn | 60810487 | 60811687 | 1201 | CarSat1 | red    | na |
| chrUn | 60811730 | 60813628 | 1899 | CarSat1 | red    | na |
| chrUn | 60813661 | 60814375 | 715  | CarSat1 | red    | na |
| chrUn | 60814399 | 60815101 | 703  | CarSat1 | red    | na |
| chrUn | 60815134 | 60816575 | 1442 | CarSat1 | red    | na |
| chrUn | 60816608 | 60818795 | 2188 | CarSat1 | red    | na |
| chrUn | 60818819 | 60821441 | 2623 | CarSat1 | red    | na |
| chrUn | 60832235 | 60833073 | 839  | Sat2CF  | purple | na |
| chrUn | 60832296 | 60833022 | 727  | Sat2CF  | purple | na |
| chrUn | 60844134 | 60844647 | 514  | Sat2CF  | purple | na |
| chrUn | 60845670 | 60846929 | 1260 | CarSat1 | red    | na |
| chrUn | 60846956 | 60847914 | 959  | CarSat1 | red    | na |
| chrUn | 60847930 | 60848398 | 469  | CarSat1 | red    | na |
| chrUn | 60848425 | 60849136 | 712  | CarSat1 | red    | na |
| chrUn | 60849163 | 60850220 | 1058 | CarSat1 | red    | na |
| chrUn | 60850407 | 60851433 | 1027 | CarSat1 | red    | na |
| chrUn | 60852350 | 60853686 | 1337 | CarSat1 | red    | na |
| chrUn | 60853708 | 60854421 | 714  | CarSat1 | red    | na |
| chrUn | 60854448 | 60855411 | 964  | CarSat1 | red    | na |
| chrUn | 60855437 | 60855895 | 459  | CarSat1 | red    | na |
| chrUn | 60855922 | 60856632 | 711  | CarSat1 | red    | na |
| chrUn | 60856659 | 60857366 | 708  | CarSat1 | red    | na |

|       |          |          |      |         |      |    |
|-------|----------|----------|------|---------|------|----|
| chrUn | 60857393 | 60858839 | 1447 | CarSat1 | red  | na |
| chrUn | 60858866 | 60859575 | 710  | CarSat1 | red  | na |
| chrUn | 60859602 | 60860314 | 713  | CarSat1 | red  | na |
| chrUn | 60860339 | 60861300 | 962  | CarSat1 | red  | na |
| chrUn | 60861316 | 60862522 | 1207 | CarSat1 | red  | na |
| chrUn | 60862549 | 60863998 | 1450 | CarSat1 | red  | na |
| chrUn | 60864025 | 60864734 | 710  | CarSat1 | red  | na |
| chrUn | 60864761 | 60865306 | 546  | CarSat1 | red  | na |
| chrUn | 60866400 | 60868100 | 1701 | CarSat1 | red  | na |
| chrUn | 60868116 | 60868836 | 721  | CarSat1 | red  | na |
| chrUn | 60868852 | 60870059 | 1208 | CarSat1 | red  | na |
| chrUn | 60870086 | 60871047 | 962  | CarSat1 | red  | na |
| chrUn | 60871063 | 60871531 | 469  | CarSat1 | red  | na |
| chrUn | 60871558 | 60873258 | 1701 | CarSat1 | red  | na |
| chrUn | 60873274 | 60873741 | 468  | CarSat1 | red  | na |
| chrUn | 60873768 | 60874945 | 1178 | CarSat1 | red  | na |
| chrUn | 60874975 | 60876937 | 1963 | CarSat1 | red  | na |
| chrUn | 60876961 | 60877674 | 714  | CarSat1 | red  | na |
| chrUn | 60877698 | 60880399 | 2702 | CarSat1 | red  | na |
| chrUn | 60880420 | 60881136 | 717  | CarSat1 | red  | na |
| chrUn | 60881163 | 60882127 | 965  | CarSat1 | red  | na |
| chrUn | 60882143 | 60882864 | 722  | CarSat1 | red  | na |
| chrUn | 60882880 | 60883599 | 720  | CarSat1 | red  | na |
| chrUn | 60883615 | 60885024 | 1410 | CarSat1 | red  | na |
| chrUn | 60886033 | 60887105 | 1073 | SAT1_CF | blue | na |
| chrUn | 60887117 | 60887800 | 684  | SAT1_CF | blue | na |
| chrUn | 60887811 | 60888313 | 503  | SAT1_CF | blue | na |
| chrUn | 60888356 | 60888778 | 423  | SAT1_CF | blue | na |
| chrUn | 60888801 | 60888907 | 107  | SAT1_CF | blue | na |
| chrUn | 60888920 | 60890591 | 1672 | SAT1_CF | blue | na |
| chrUn | 60890654 | 60891433 | 780  | SAT1_CF | blue | na |
| chrUn | 60891481 | 60892157 | 677  | SAT1_CF | blue | na |
| chrUn | 60892169 | 60892852 | 684  | SAT1_CF | blue | na |
| chrUn | 60892864 | 60893908 | 1045 | SAT1_CF | blue | na |
| chrUn | 60893930 | 60895415 | 1486 | SAT1_CF | blue | na |
| chrUn | 60895427 | 60896516 | 1090 | SAT1_CF | blue | na |
| chrUn | 60896560 | 60897104 | 545  | SAT1_CF | blue | na |
| chrUn | 60897154 | 60897596 | 443  | SAT1_CF | blue | na |
| chrUn | 60897626 | 60898301 | 676  | SAT1_CF | blue | na |
| chrUn | 60898313 | 60899074 | 762  | SAT1_CF | blue | na |
| chrUn | 60899095 | 60899589 | 495  | SAT1_CF | blue | na |
| chrUn | 60899634 | 60899790 | 157  | SAT1_CF | blue | na |

|       |          |          |      |         |      |    |
|-------|----------|----------|------|---------|------|----|
| chrUn | 60899805 | 60902388 | 2584 | SAT1_CF | blue | na |
| chrUn | 60902400 | 60903030 | 631  | SAT1_CF | blue | na |
| chrUn | 60903042 | 60903652 | 611  | SAT1_CF | blue | na |
| chrUn | 60903712 | 60904840 | 1129 | SAT1_CF | blue | na |
| chrUn | 60905847 | 60906378 | 532  | CarSat1 | red  | na |
| chrUn | 60906591 | 60906939 | 349  | CarSat1 | red  | na |
| chrUn | 60907122 | 60907281 | 160  | CarSat1 | red  | na |
| chrUn | 60907297 | 60907591 | 295  | CarSat1 | red  | na |
| chrUn | 60907618 | 60908339 | 722  | CarSat1 | red  | na |
| chrUn | 60908488 | 60909439 | 952  | CarSat1 | red  | na |
| chrUn | 60925521 | 60927149 | 1629 | SAT1_CF | blue | na |
| chrUn | 60927161 | 60927812 | 652  | SAT1_CF | blue | na |
| chrUn | 60927857 | 60928357 | 501  | SAT1_CF | blue | na |
| chrUn | 60928397 | 60931017 | 2621 | SAT1_CF | blue | na |
| chrUn | 60931028 | 60931146 | 119  | SAT1_CF | blue | na |
| chrUn | 60931164 | 60931812 | 649  | SAT1_CF | blue | na |
| chrUn | 60931823 | 60932397 | 575  | SAT1_CF | blue | na |
| chrUn | 60932420 | 60932526 | 107  | SAT1_CF | blue | na |
| chrUn | 60932539 | 60934219 | 1681 | SAT1_CF | blue | na |
| chrUn | 60934273 | 60934400 | 128  | SAT1_CF | blue | na |
| chrUn | 60934444 | 60935088 | 645  | SAT1_CF | blue | na |
| chrUn | 60935101 | 60935776 | 676  | SAT1_CF | blue | na |
| chrUn | 60935788 | 60936472 | 685  | SAT1_CF | blue | na |
| chrUn | 60936485 | 60937063 | 579  | SAT1_CF | blue | na |
| chrUn | 60937384 | 60937621 | 238  | SAT1_CF | blue | na |
| chrUn | 60937654 | 60938807 | 1154 | SAT1_CF | blue | na |
| chrUn | 60938820 | 60940084 | 1265 | SAT1_CF | blue | na |
| chrUn | 60940114 | 60941088 | 975  | SAT1_CF | blue | na |
| chrUn | 60941100 | 60942299 | 1200 | SAT1_CF | blue | na |
| chrUn | 60942352 | 60942901 | 550  | SAT1_CF | blue | na |
| chrUn | 60942924 | 60944465 | 1542 | SAT1_CF | blue | na |
| chrUn | 60958952 | 60960390 | 1439 | CarSat1 | red  | na |
| chrUn | 60960411 | 60961191 | 781  | CarSat1 | red  | na |
| chrUn | 60961205 | 60961648 | 444  | CarSat1 | red  | na |
| chrUn | 60961651 | 60962038 | 388  | SAT1_CF | blue | na |
| chrUn | 60962050 | 60962666 | 617  | SAT1_CF | blue | na |
| chrUn | 60962661 | 60963379 | 719  | CarSat1 | red  | na |
| chrUn | 60963410 | 60963832 | 423  | CarSat1 | red  | na |
| chrUn | 60965153 | 60967992 | 2840 | CarSat1 | red  | na |
| chrUn | 60968235 | 60970483 | 2249 | CarSat1 | red  | na |
| chrUn | 60970513 | 60972000 | 1488 | CarSat1 | red  | na |
| chrUn | 60972210 | 60972684 | 475  | CarSat1 | red  | na |

|       |          |          |      |         |        |    |
|-------|----------|----------|------|---------|--------|----|
| chrUn | 60972717 | 60973504 | 788  | CarSat1 | red    | na |
| chrUn | 60973517 | 60974786 | 1270 | CarSat1 | red    | na |
| chrUn | 60974810 | 60975526 | 717  | CarSat1 | red    | na |
| chrUn | 60975559 | 60976494 | 936  | CarSat1 | red    | na |
| chrUn | 60976524 | 60978482 | 1959 | CarSat1 | red    | na |
| chrUn | 60978505 | 60980072 | 1568 | CarSat1 | red    | na |
| chrUn | 60980097 | 60980629 | 533  | CarSat1 | red    | na |
| chrUn | 60980653 | 60981918 | 1266 | CarSat1 | red    | na |
| chrUn | 60984778 | 60985843 | 1066 | CarSat1 | red    | na |
| chrUn | 60985873 | 60986359 | 487  | CarSat1 | red    | na |
| chrUn | 60986383 | 60987083 | 701  | CarSat1 | red    | na |
| chrUn | 60988262 | 60988978 | 717  | Sat2CF  | purple | na |
| chrUn | 60988844 | 60989006 | 163  | Sat2CF  | purple | na |
| chrUn | 61007716 | 61008872 | 1157 | Sat2CF  | purple | na |
| chrUn | 61031794 | 61032233 | 440  | CarSat1 | red    | na |
| chrUn | 61076696 | 61077246 | 551  | Sat2CF  | purple | na |
| chrUn | 61092525 | 61093148 | 624  | Sat2CF  | purple | na |
| chrUn | 61092598 | 61093148 | 551  | Sat2CF  | purple | na |
| chrUn | 61092611 | 61093073 | 463  | Sat2CF  | purple | na |
| chrUn | 61093880 | 61094030 | 151  | Sat2CF  | purple | na |
| chrUn | 61093884 | 61094136 | 253  | Sat2CF  | purple | na |
| chrUn | 61110654 | 61111769 | 1116 | Sat2CF  | purple | na |
| chrUn | 61130604 | 61131486 | 883  | SAT1_CF | blue   | na |
| chrUn | 61131504 | 61132188 | 685  | SAT1_CF | blue   | na |
| chrUn | 61132201 | 61134443 | 2243 | SAT1_CF | blue   | na |
| chrUn | 61134483 | 61134977 | 495  | SAT1_CF | blue   | na |
| chrUn | 61134991 | 61135757 | 767  | SAT1_CF | blue   | na |
| chrUn | 61135769 | 61136444 | 676  | SAT1_CF | blue   | na |
| chrUn | 61136492 | 61138053 | 1562 | SAT1_CF | blue   | na |
| chrUn | 61140006 | 61141518 | 1513 | SAT1_CF | blue   | na |
| chrUn | 61141530 | 61142413 | 884  | SAT1_CF | blue   | na |
| chrUn | 61142441 | 61143415 | 975  | SAT1_CF | blue   | na |
| chrUn | 61143433 | 61146210 | 2778 | SAT1_CF | blue   | na |
| chrUn | 61146222 | 61146824 | 603  | SAT1_CF | blue   | na |
| chrUn | 61146844 | 61146939 | 96   | SAT1_CF | blue   | na |
| chrUn | 61146963 | 61147516 | 554  | SAT1_CF | blue   | na |
| chrUn | 61147528 | 61147614 | 87   | SAT1_CF | blue   | na |
| chrUn | 61148903 | 61149146 | 244  | SAT1_CF | blue   | na |
| chrUn | 61149188 | 61149887 | 700  | SAT1_CF | blue   | na |
| chrUn | 61149901 | 61151030 | 1130 | SAT1_CF | blue   | na |
| chrUn | 61151083 | 61151584 | 502  | SAT1_CF | blue   | na |
| chrUn | 61151597 | 61152317 | 721  | SAT1_CF | blue   | na |

|       |          |          |      |         |        |    |
|-------|----------|----------|------|---------|--------|----|
| chrUn | 61153326 | 61154594 | 1269 | CarSat1 | red    | na |
| chrUn | 61154624 | 61155336 | 713  | CarSat1 | red    | na |
| chrUn | 61155366 | 61156550 | 1185 | CarSat1 | red    | na |
| chrUn | 61156571 | 61158016 | 1446 | CarSat1 | red    | na |
| chrUn | 61158043 | 61158509 | 467  | CarSat1 | red    | na |
| chrUn | 61158525 | 61160623 | 2099 | CarSat1 | red    | na |
| chrUn | 61160873 | 61164184 | 3312 | CarSat1 | red    | na |
| chrUn | 61164214 | 61166390 | 2177 | CarSat1 | red    | na |
| chrUn | 61166420 | 61167127 | 708  | CarSat1 | red    | na |
| chrUn | 61167157 | 61167879 | 723  | CarSat1 | red    | na |
| chrUn | 61167894 | 61170075 | 2182 | CarSat1 | red    | na |
| chrUn | 61170105 | 61170826 | 722  | CarSat1 | red    | na |
| chrUn | 61170841 | 61172153 | 1313 | CarSat1 | red    | na |
| chrUn | 61239988 | 61240601 | 614  | SAT1_CF | blue   | na |
| chrUn | 61240645 | 61242390 | 1746 | SAT1_CF | blue   | na |
| chrUn | 61242432 | 61244942 | 2511 | SAT1_CF | blue   | na |
| chrUn | 61244954 | 61245632 | 679  | SAT1_CF | blue   | na |
| chrUn | 61245675 | 61246323 | 649  | SAT1_CF | blue   | na |
| chrUn | 61276296 | 61277042 | 747  | Sat2CF  | purple | na |
| chrUn | 61276375 | 61277518 | 1144 | Sat2CF  | purple | na |
| chrUn | 61302058 | 61302932 | 875  | Sat36CF | na     | na |
| chrUn | 61323924 | 61325166 | 1243 | CarSat1 | red    | na |
| chrUn | 61325193 | 61325903 | 711  | CarSat1 | red    | na |
| chrUn | 61325930 | 61326639 | 710  | CarSat1 | red    | na |
| chrUn | 61326666 | 61327377 | 712  | CarSat1 | red    | na |
| chrUn | 61327404 | 61328113 | 710  | CarSat1 | red    | na |
| chrUn | 61328140 | 61330575 | 2436 | CarSat1 | red    | na |
| chrUn | 61330591 | 61332785 | 2195 | CarSat1 | red    | na |
| chrUn | 61332801 | 61333419 | 619  | CarSat1 | red    | na |
| chrUn | 61333833 | 61334535 | 703  | CarSat1 | red    | na |
| chrUn | 61334551 | 61335019 | 469  | CarSat1 | red    | na |
| chrUn | 61335046 | 61336008 | 963  | CarSat1 | red    | na |
| chrUn | 61336024 | 61336745 | 722  | CarSat1 | red    | na |
| chrUn | 61336761 | 61339440 | 2680 | CarSat1 | red    | na |
| chrUn | 61339467 | 61340178 | 712  | CarSat1 | red    | na |
| chrUn | 61340205 | 61341166 | 962  | CarSat1 | red    | na |
| chrUn | 61341182 | 61342693 | 1512 | CarSat1 | red    | na |
| chrUn | 61379537 | 61380490 | 954  | Sat2CF  | purple | na |
| chrUn | 61379600 | 61380410 | 811  | Sat2CF  | purple | na |
| chrUn | 61404097 | 61405051 | 955  | CarSat1 | red    | na |
| chrUn | 61405070 | 61405923 | 854  | CarSat1 | red    | na |
| chrUn | 61405951 | 61407933 | 1983 | CarSat1 | red    | na |



|       |          |          |              |        |    |
|-------|----------|----------|--------------|--------|----|
| chrUn | 61407948 | 61408310 | 363 SAT1_CF  | blue   | na |
| chrUn | 61408381 | 61409890 | 1510 SAT1_CF | blue   | na |
| chrUn | 61409931 | 61411068 | 1138 SAT1_CF | blue   | na |
| chrUn | 61411063 | 61411737 | 675 CarSat1  | red    | na |
| chrUn | 61412130 | 61412367 | 238 CarSat1  | red    | na |
| chrUn | 61413401 | 61413560 | 160 Carsat2  | orange | na |
| chrUn | 61413423 | 61414603 | 1181 CarSat1 | red    | na |
| chrUn | 61414633 | 61416350 | 1718 CarSat1 | red    | na |
| chrUn | 61416371 | 61419041 | 2671 CarSat1 | red    | na |
| chrUn | 61419071 | 61419779 | 709 CarSat1  | red    | na |
| chrUn | 61419809 | 61420517 | 709 CarSat1  | red    | na |
| chrUn | 61420547 | 61423001 | 2455 CarSat1 | red    | na |
| chrUn | 61423022 | 61423468 | 447 CarSat1  | red    | na |
| chrUn | 61423498 | 61424434 | 937 CarSat1  | red    | na |
| chrUn | 61426084 | 61428994 | 2911 CarSat1 | red    | na |
| chrUn | 61429032 | 61429522 | 491 CarSat1  | red    | na |
| chrUn | 61429539 | 61430808 | 1270 CarSat1 | red    | na |
| chrUn | 61430837 | 61431280 | 444 CarSat1  | red    | na |
| chrUn | 61431310 | 61432289 | 980 CarSat1  | red    | na |
| chrUn | 61432310 | 61433089 | 780 CarSat1  | red    | na |
| chrUn | 61474711 | 61476789 | 2079 SAT1_CF | blue   | na |
| chrUn | 61476863 | 61477345 | 483 SAT1_CF  | blue   | na |
| chrUn | 61477363 | 61477529 | 167 SAT1_CF  | blue   | na |
| chrUn | 61477541 | 61478214 | 674 SAT1_CF  | blue   | na |
| chrUn | 61478257 | 61479848 | 1592 SAT1_CF | blue   | na |
| chrUn | 61479883 | 61482408 | 2526 SAT1_CF | blue   | na |
| chrUn | 61482448 | 61484375 | 1928 SAT1_CF | blue   | na |
| chrUn | 61484400 | 61485268 | 869 SAT1_CF  | blue   | na |
| chrUn | 61485313 | 61485709 | 397 SAT1_CF  | blue   | na |
| chrUn | 61485742 | 61486283 | 542 SAT1_CF  | blue   | na |
| chrUn | 61486326 | 61488362 | 2037 SAT1_CF | blue   | na |
| chrUn | 61488402 | 61488902 | 501 SAT1_CF  | blue   | na |
| chrUn | 61488915 | 61489825 | 911 SAT1_CF  | blue   | na |
| chrUn | 61489839 | 61491400 | 1562 SAT1_CF | blue   | na |
| chrUn | 61491418 | 61492797 | 1380 SAT1_CF | blue   | na |
| chrUn | 61492809 | 61492933 | 125 SAT1_CF  | blue   | na |
| chrUn | 61493943 | 61495135 | 1193 CarSat1 | red    | na |
| chrUn | 61495151 | 61501026 | 5876 CarSat1 | red    | na |
| chrUn | 61501042 | 61502743 | 1702 CarSat1 | red    | na |
| chrUn | 61502770 | 61504750 | 1981 CarSat1 | red    | na |
| chrUn | 61507597 | 61508644 | 1048 CarSat1 | red    | na |
| chrUn | 61508671 | 61509140 | 470 CarSat1  | red    | na |

|       |          |          |      |         |        |    |
|-------|----------|----------|------|---------|--------|----|
| chrUn | 61509156 | 61510387 | 1232 | CarSat1 | red    | na |
| chrUn | 61510417 | 61511336 | 920  | CarSat1 | red    | na |
| chrUn | 61511369 | 61512332 | 964  | CarSat1 | red    | na |
| chrUn | 61512359 | 61514075 | 1717 | CarSat1 | red    | na |
| chrUn | 61514105 | 61514972 | 868  | CarSat1 | red    | na |
| chrUn | 61515979 | 61516440 | 462  | SAT1_CF | blue   | na |
| chrUn | 61516483 | 61517158 | 676  | SAT1_CF | blue   | na |
| chrUn | 61517170 | 61517774 | 605  | SAT1_CF | blue   | na |
| chrUn | 61517786 | 61518398 | 613  | SAT1_CF | blue   | na |
| chrUn | 61518411 | 61519090 | 680  | SAT1_CF | blue   | na |
| chrUn | 61519107 | 61519605 | 499  | SAT1_CF | blue   | na |
| chrUn | 61519647 | 61520321 | 675  | SAT1_CF | blue   | na |
| chrUn | 61520349 | 61520850 | 502  | SAT1_CF | blue   | na |
| chrUn | 61520863 | 61521257 | 395  | SAT1_CF | blue   | na |
| chrUn | 61521301 | 61522041 | 741  | SAT1_CF | blue   | na |
| chrUn | 61522626 | 61522779 | 154  | SAT1_CF | blue   | na |
| chrUn | 61522836 | 61523355 | 520  | SAT1_CF | blue   | na |
| chrUn | 61523451 | 61523587 | 137  | SAT1_CF | blue   | na |
| chrUn | 61523602 | 61524127 | 526  | SAT1_CF | blue   | na |
| chrUn | 61524157 | 61524312 | 156  | SAT1_CF | blue   | na |
| chrUn | 61524329 | 61524776 | 448  | SAT1_CF | blue   | na |
| chrUn | 61524800 | 61525428 | 629  | SAT1_CF | blue   | na |
| chrUn | 61525452 | 61525558 | 107  | SAT1_CF | blue   | na |
| chrUn | 61525570 | 61526072 | 503  | SAT1_CF | blue   | na |
| chrUn | 61526159 | 61528848 | 2690 | SAT1_CF | blue   | na |
| chrUn | 61528860 | 61529379 | 520  | SAT1_CF | blue   | na |
| chrUn | 61529394 | 61529474 | 81   | SAT1_CF | blue   | na |
| chrUn | 61529487 | 61530170 | 684  | SAT1_CF | blue   | na |
| chrUn | 61530195 | 61530347 | 153  | SAT1_CF | blue   | na |
| chrUn | 61530371 | 61530868 | 498  | SAT1_CF | blue   | na |
| chrUn | 61530910 | 61531869 | 960  | SAT1_CF | blue   | na |
| chrUn | 61532263 | 61532743 | 481  | SAT1_CF | blue   | na |
| chrUn | 61532786 | 61533330 | 545  | SAT1_CF | blue   | na |
| chrUn | 61533387 | 61534051 | 665  | SAT1_CF | blue   | na |
| chrUn | 61534108 | 61534627 | 520  | SAT1_CF | blue   | na |
| chrUn | 61534745 | 61535077 | 333  | SAT1_CF | blue   | na |
| chrUn | 61580429 | 61581086 | 658  | Sat29CF | na     | na |
| chrUn | 61605454 | 61605529 | 76   | Sat2CF  | purple | na |
| chrUn | 61609322 | 61610364 | 1043 | CarSat1 | red    | na |
| chrUn | 61610391 | 61611350 | 960  | CarSat1 | red    | na |
| chrUn | 61611367 | 61612301 | 935  | CarSat1 | red    | na |
| chrUn | 61612316 | 61612443 | 128  | Carsat2 | orange | na |

|       |          |          |      |         |        |    |
|-------|----------|----------|------|---------|--------|----|
| chrUn | 61612331 | 61614293 | 1963 | CarSat1 | red    | na |
| chrUn | 61614310 | 61615030 | 721  | CarSat1 | red    | na |
| chrUn | 61615055 | 61616252 | 1198 | CarSat1 | red    | na |
| chrUn | 61616279 | 61617454 | 1176 | CarSat1 | red    | na |
| chrUn | 61617484 | 61618982 | 1499 | CarSat1 | red    | na |
| chrUn | 61619308 | 61620406 | 1099 | CarSat1 | red    | na |
| chrUn | 61620421 | 61620548 | 128  | Carsat2 | orange | na |
| chrUn | 61620436 | 61621144 | 709  | CarSat1 | red    | na |
| chrUn | 61621174 | 61622395 | 1222 | CarSat1 | red    | na |
| chrUn | 61622420 | 61624093 | 1674 | CarSat1 | red    | na |
| chrUn | 61624108 | 61624235 | 128  | Carsat2 | orange | na |
| chrUn | 61624123 | 61625342 | 1220 | CarSat1 | red    | na |
| chrUn | 61625367 | 61626303 | 937  | CarSat1 | red    | na |
| chrUn | 61626333 | 61627311 | 979  | CarSat1 | red    | na |
| chrUn | 61627338 | 61627726 | 389  | CarSat1 | red    | na |
| chrUn | 61643307 | 61643931 | 625  | CarSat1 | red    | na |
| chrUn | 61644032 | 61645622 | 1591 | CarSat1 | red    | na |
| chrUn | 61645648 | 61647594 | 1947 | CarSat1 | red    | na |
| chrUn | 61647596 | 61647815 | 220  | SAT1_CF | blue   | na |
| chrUn | 61648836 | 61650043 | 1208 | CarSat1 | red    | na |
| chrUn | 61650070 | 61651518 | 1449 | CarSat1 | red    | na |
| chrUn | 61651545 | 61652721 | 1177 | CarSat1 | red    | na |
| chrUn | 61652751 | 61653457 | 707  | CarSat1 | red    | na |
| chrUn | 61653487 | 61654199 | 713  | CarSat1 | red    | na |
| chrUn | 61654214 | 61654341 | 128  | Carsat2 | orange | na |
| chrUn | 61654229 | 61655669 | 1441 | CarSat1 | red    | na |
| chrUn | 61655684 | 61655810 | 127  | Carsat2 | orange | na |
| chrUn | 61655699 | 61656410 | 712  | CarSat1 | red    | na |
| chrUn | 61656425 | 61656552 | 128  | Carsat2 | orange | na |
| chrUn | 61656440 | 61659137 | 2698 | CarSat1 | red    | na |
| chrUn | 61659170 | 61660105 | 936  | CarSat1 | red    | na |
| chrUn | 61660135 | 61660845 | 711  | CarSat1 | red    | na |
| chrUn | 61660860 | 61660986 | 127  | Carsat2 | orange | na |
| chrUn | 61660875 | 61661586 | 712  | CarSat1 | red    | na |
| chrUn | 61661616 | 61662825 | 1210 | CarSat1 | red    | na |
| chrUn | 61664046 | 61665850 | 1805 | CarSat1 | red    | na |
| chrUn | 61665880 | 61666588 | 709  | CarSat1 | red    | na |
| chrUn | 61666618 | 61667299 | 682  | CarSat1 | red    | na |
| chrUn | 61693425 | 61699130 | 5706 | CarSat1 | red    | na |
| chrUn | 61699319 | 61699520 | 202  | CarSat1 | red    | na |
| chrUn | 61699556 | 61700993 | 1438 | CarSat1 | red    | na |
| chrUn | 61701020 | 61702196 | 1177 | CarSat1 | red    | na |

|       |          |          |      |         |        |    |
|-------|----------|----------|------|---------|--------|----|
| chrUn | 61702226 | 61702287 | 62   | CarSat1 | red    | na |
| chrUn | 61702475 | 61703662 | 1188 | CarSat1 | red    | na |
| chrUn | 61703678 | 61704147 | 470  | CarSat1 | red    | na |
| chrUn | 61704174 | 61705616 | 1443 | CarSat1 | red    | na |
| chrUn | 61705643 | 61708561 | 2919 | CarSat1 | red    | na |
| chrUn | 61708588 | 61709028 | 441  | CarSat1 | red    | na |
| chrUn | 61709058 | 61709766 | 709  | CarSat1 | red    | na |
| chrUn | 61709796 | 61710280 | 485  | CarSat1 | red    | na |
| chrUn | 61710304 | 61711383 | 1080 | CarSat1 | red    | na |
| chrUn | 61712440 | 61713314 | 875  | CarSat1 | red    | na |
| chrUn | 61713335 | 61713884 | 550  | CarSat1 | red    | na |
| chrUn | 61715380 | 61715910 | 531  | CarSat1 | red    | na |
| chrUn | 61715931 | 61716645 | 715  | CarSat1 | red    | na |
| chrUn | 61716666 | 61717381 | 716  | CarSat1 | red    | na |
| chrUn | 61717402 | 61718116 | 715  | CarSat1 | red    | na |
| chrUn | 61718137 | 61718851 | 715  | CarSat1 | red    | na |
| chrUn | 61718872 | 61719586 | 715  | CarSat1 | red    | na |
| chrUn | 61719607 | 61720321 | 715  | CarSat1 | red    | na |
| chrUn | 61720342 | 61721056 | 715  | CarSat1 | red    | na |
| chrUn | 61721077 | 61721791 | 715  | CarSat1 | red    | na |
| chrUn | 61721812 | 61722526 | 715  | CarSat1 | red    | na |
| chrUn | 61722547 | 61724095 | 1549 | CarSat1 | red    | na |
| chrUn | 61733530 | 61734025 | 496  | CarSat1 | red    | na |
| chrUn | 61734230 | 61734778 | 549  | CarSat1 | red    | na |
| chrUn | 61737894 | 61738354 | 461  | CarSat1 | red    | na |
| chrUn | 61738381 | 61739562 | 1182 | CarSat1 | red    | na |
| chrUn | 61739592 | 61740076 | 485  | CarSat1 | red    | na |
| chrUn | 61740100 | 61742282 | 2183 | CarSat1 | red    | na |
| chrUn | 61742306 | 61743023 | 718  | CarSat1 | red    | na |
| chrUn | 61743047 | 61745456 | 2410 | CarSat1 | red    | na |
| chrUn | 61745486 | 61746933 | 1448 | CarSat1 | red    | na |
| chrUn | 61746948 | 61747072 | 125  | Carsat2 | orange | na |
| chrUn | 61746963 | 61749143 | 2181 | CarSat1 | red    | na |
| chrUn | 61749173 | 61751356 | 2184 | CarSat1 | red    | na |
| chrUn | 61751386 | 61752094 | 709  | CarSat1 | red    | na |
| chrUn | 61752109 | 61752235 | 127  | Carsat2 | orange | na |
| chrUn | 61752124 | 61753349 | 1226 | CarSat1 | red    | na |
| chrUn | 61753373 | 61754090 | 718  | CarSat1 | red    | na |
| chrUn | 61754114 | 61755058 | 945  | CarSat1 | red    | na |
| chrUn | 61755091 | 61755793 | 703  | CarSat1 | red    | na |
| chrUn | 61756817 | 61757078 | 262  | SAT1_CF | blue   | na |
| chrUn | 61757089 | 61758214 | 1126 | SAT1_CF | blue   | na |

|       |          |          |              |        |    |
|-------|----------|----------|--------------|--------|----|
| chrUn | 61760001 | 61760536 | 536 SAT1_CF  | blue   | na |
| chrUn | 61760549 | 61761068 | 520 SAT1_CF  | blue   | na |
| chrUn | 61761087 | 61761238 | 152 SAT1_CF  | blue   | na |
| chrUn | 61761278 | 61761789 | 512 SAT1_CF  | blue   | na |
| chrUn | 61763277 | 61763854 | 578 SAT1_CF  | blue   | na |
| chrUn | 61763876 | 61765440 | 1565 SAT1_CF | blue   | na |
| chrUn | 61765468 | 61765566 | 99 SAT1_CF   | blue   | na |
| chrUn | 61765675 | 61766426 | 752 SAT1_CF  | blue   | na |
| chrUn | 61766443 | 61767057 | 615 SAT1_CF  | blue   | na |
| chrUn | 61767886 | 61769527 | 1642 SAT1_CF | blue   | na |
| chrUn | 61769545 | 61770065 | 521 SAT1_CF  | blue   | na |
| chrUn | 61770086 | 61772049 | 1964 SAT1_CF | blue   | na |
| chrUn | 61772092 | 61772758 | 667 SAT1_CF  | blue   | na |
| chrUn | 61772781 | 61773461 | 681 SAT1_CF  | blue   | na |
| chrUn | 61773481 | 61773975 | 495 SAT1_CF  | blue   | na |
| chrUn | 61774015 | 61774567 | 553 SAT1_CF  | blue   | na |
| chrUn | 61774585 | 61775121 | 537 CarSat1  | red    | na |
| chrUn | 61775161 | 61776802 | 1642 CarSat1 | red    | na |
| chrUn | 61780955 | 61781647 | 693 CarSat1  | red    | na |
| chrUn | 61781659 | 61783001 | 1343 CarSat1 | red    | na |
| chrUn | 61798658 | 61799741 | 1084 Sat2CF  | purple | na |
| chrUn | 61814574 | 61815830 | 1257 CarSat1 | red    | na |
| chrUn | 61815860 | 61817308 | 1449 CarSat1 | red    | na |
| chrUn | 61817338 | 61820259 | 2922 CarSat1 | red    | na |
| chrUn | 61820289 | 61822249 | 1961 CarSat1 | red    | na |
| chrUn | 61822273 | 61824743 | 2471 CarSat1 | red    | na |
| chrUn | 61824758 | 61824884 | 127 Carsat2  | orange | na |
| chrUn | 61824773 | 61826217 | 1445 CarSat1 | red    | na |
| chrUn | 61826248 | 61829911 | 3664 CarSat1 | red    | na |
| chrUn | 61829941 | 61830427 | 487 CarSat1  | red    | na |
| chrUn | 61830451 | 61831387 | 937 CarSat1  | red    | na |
| chrUn | 61831417 | 61832124 | 708 CarSat1  | red    | na |
| chrUn | 61832139 | 61832264 | 126 Carsat2  | orange | na |
| chrUn | 61832154 | 61832988 | 835 CarSat1  | red    | na |
| chrUn | 61833999 | 61834853 | 855 CarSat1  | red    | na |
| chrUn | 61834869 | 61837058 | 2190 CarSat1 | red    | na |
| chrUn | 61837074 | 61840731 | 3658 CarSat1 | red    | na |
| chrUn | 61840765 | 61841477 | 713 CarSat1  | red    | na |
| chrUn | 61841494 | 61844199 | 2706 CarSat1 | red    | na |
| chrUn | 61844241 | 61846132 | 1892 CarSat1 | red    | na |
| chrUn | 61846159 | 61848347 | 2189 CarSat1 | red    | na |
| chrUn | 61848374 | 61849351 | 978 CarSat1  | red    | na |

|       |          |          |      |         |      |    |
|-------|----------|----------|------|---------|------|----|
| chrUn | 61849381 | 61850087 | 707  | CarSat1 | red  | na |
| chrUn | 61850117 | 61851293 | 1177 | CarSat1 | red  | na |
| chrUn | 61851320 | 61851867 | 548  | CarSat1 | red  | na |
| chrUn | 61880881 | 61881735 | 855  | SAT1_CF | blue | na |
| chrUn | 61881762 | 61882434 | 673  | SAT1_CF | blue | na |
| chrUn | 61882446 | 61883129 | 684  | SAT1_CF | blue | na |
| chrUn | 61883142 | 61883642 | 501  | SAT1_CF | blue | na |
| chrUn | 61883655 | 61884143 | 489  | SAT1_CF | blue | na |
| chrUn | 61884187 | 61886073 | 1887 | SAT1_CF | blue | na |
| chrUn | 61886116 | 61886282 | 167  | SAT1_CF | blue | na |
| chrUn | 61886301 | 61887014 | 714  | SAT1_CF | blue | na |
| chrUn | 61887026 | 61887610 | 585  | SAT1_CF | blue | na |
| chrUn | 61887653 | 61888765 | 1113 | SAT1_CF | blue | na |
| chrUn | 61888808 | 61890163 | 1356 | SAT1_CF | blue | na |
| chrUn | 61890190 | 61890690 | 501  | SAT1_CF | blue | na |
| chrUn | 61890756 | 61890892 | 137  | SAT1_CF | blue | na |
| chrUn | 61890920 | 61892290 | 1371 | SAT1_CF | blue | na |
| chrUn | 61892308 | 61892632 | 325  | SAT1_CF | blue | na |
| chrUn | 61892675 | 61894311 | 1637 | SAT1_CF | blue | na |
| chrUn | 61894356 | 61894510 | 155  | SAT1_CF | blue | na |
| chrUn | 61894527 | 61895665 | 1139 | SAT1_CF | blue | na |
| chrUn | 61895737 | 61896329 | 593  | SAT1_CF | blue | na |
| chrUn | 61896360 | 61897587 | 1228 | SAT1_CF | blue | na |
| chrUn | 61897615 | 61898115 | 501  | SAT1_CF | blue | na |
| chrUn | 61898202 | 61898651 | 450  | SAT1_CF | blue | na |
| chrUn | 61899711 | 61901214 | 1504 | CarSat1 | red  | na |
| chrUn | 61901239 | 61901961 | 723  | CarSat1 | red  | na |
| chrUn | 61901977 | 61902939 | 963  | CarSat1 | red  | na |
| chrUn | 61902966 | 61903676 | 711  | CarSat1 | red  | na |
| chrUn | 61903703 | 61904163 | 461  | CarSat1 | red  | na |
| chrUn | 61904188 | 61905887 | 1700 | CarSat1 | red  | na |
| chrUn | 61905914 | 61906624 | 711  | CarSat1 | red  | na |
| chrUn | 61906651 | 61907111 | 461  | CarSat1 | red  | na |
| chrUn | 61907136 | 61907847 | 712  | CarSat1 | red  | na |
| chrUn | 61907872 | 61908641 | 770  | CarSat1 | red  | na |
| chrUn | 61909502 | 61910625 | 1124 | CarSat1 | red  | na |
| chrUn | 61910650 | 61911361 | 712  | CarSat1 | red  | na |
| chrUn | 61911386 | 61913826 | 2441 | CarSat1 | red  | na |
| chrUn | 61913853 | 61915819 | 1967 | CarSat1 | red  | na |
| chrUn | 61915844 | 61916805 | 962  | CarSat1 | red  | na |
| chrUn | 61916832 | 61918375 | 1544 | CarSat1 | red  | na |
| chrUn | 61919390 | 61920062 | 673  | CarSat1 | red  | na |

|       |          |          |      |         |     |    |
|-------|----------|----------|------|---------|-----|----|
| chrUn | 61920099 | 61921323 | 1225 | CarSat1 | red | na |
| chrUn | 61921348 | 61926215 | 4868 | CarSat1 | red | na |
| chrUn | 61926248 | 61927856 | 1609 | CarSat1 | red | na |
| chrUn | 61928031 | 61928998 | 968  | CarSat1 | red | na |
| chrUn | 61929301 | 61930262 | 962  | CarSat1 | red | na |
| chrUn | 61930278 | 61931214 | 937  | CarSat1 | red | na |
| chrUn | 61931244 | 61932238 | 995  | CarSat1 | red | na |
| chrUn | 61932265 | 61932972 | 708  | CarSat1 | red | na |
| chrUn | 61932999 | 61933439 | 441  | CarSat1 | red | na |
| chrUn | 61933469 | 61935921 | 2453 | CarSat1 | red | na |
| chrUn | 61935948 | 61936656 | 709  | CarSat1 | red | na |
| chrUn | 61936685 | 61937505 | 821  | CarSat1 | red | na |
| chrUn | 61961354 | 61961928 | 575  | CarSat1 | red | na |
| chrUn | 61961958 | 61962681 | 724  | CarSat1 | red | na |
| chrUn | 61962696 | 61963625 | 930  | CarSat1 | red | na |
| chrUn | 61963651 | 61964882 | 1232 | CarSat1 | red | na |
| chrUn | 61964912 | 61965635 | 724  | CarSat1 | red | na |
| chrUn | 61965650 | 61966361 | 712  | CarSat1 | red | na |
| chrUn | 61966391 | 61967846 | 1456 | CarSat1 | red | na |
| chrUn | 61967861 | 61969322 | 1462 | CarSat1 | red | na |
| chrUn | 61969337 | 61970795 | 1459 | CarSat1 | red | na |
| chrUn | 61970810 | 61972075 | 1266 | CarSat1 | red | na |
| chrUn | 61972227 | 61972531 | 305  | CarSat1 | red | na |
| chrUn | 61972589 | 61973291 | 703  | CarSat1 | red | na |
| chrUn | 61973306 | 61974753 | 1448 | CarSat1 | red | na |
| chrUn | 61974783 | 61975474 | 692  | CarSat1 | red | na |
| chrUn | 61975517 | 61976239 | 723  | CarSat1 | red | na |
| chrUn | 61976254 | 61976974 | 721  | CarSat1 | red | na |
| chrUn | 61976990 | 61977717 | 728  | CarSat1 | red | na |
| chrUn | 61977732 | 61978439 | 708  | CarSat1 | red | na |
| chrUn | 61978476 | 61979110 | 635  | CarSat1 | red | na |
| chrUn | 62020148 | 62021923 | 1776 | CarSat1 | red | na |
| chrUn | 62021938 | 62026069 | 4132 | CarSat1 | red | na |
| chrUn | 62026096 | 62026802 | 707  | CarSat1 | red | na |
| chrUn | 62026833 | 62028277 | 1445 | CarSat1 | red | na |
| chrUn | 62028304 | 62029751 | 1448 | CarSat1 | red | na |
| chrUn | 62029782 | 62030489 | 708  | CarSat1 | red | na |
| chrUn | 62030516 | 62031226 | 711  | CarSat1 | red | na |
| chrUn | 62031253 | 62032701 | 1449 | CarSat1 | red | na |
| chrUn | 62032732 | 62033706 | 975  | CarSat1 | red | na |
| chrUn | 62033751 | 62034921 | 1171 | CarSat1 | red | na |
| chrUn | 62034952 | 62035657 | 706  | CarSat1 | red | na |

|       |          |          |              |        |    |
|-------|----------|----------|--------------|--------|----|
| chrUn | 62035684 | 62036394 | 711 CarSat1  | red    | na |
| chrUn | 62036421 | 62037136 | 716 CarSat1  | red    | na |
| chrUn | 62037162 | 62037869 | 708 CarSat1  | red    | na |
| chrUn | 62080715 | 62080839 | 125 Sat2CF   | purple | na |
| chrUn | 62080731 | 62081529 | 799 Sat2CF   | purple | na |
| chrUn | 62082953 | 62083808 | 856 CarSat1  | red    | na |
| chrUn | 62083838 | 62084546 | 709 CarSat1  | red    | na |
| chrUn | 62084574 | 62085097 | 524 CarSat1  | red    | na |
| chrUn | 62085116 | 62085888 | 773 CarSat1  | red    | na |
| chrUn | 62085915 | 62086625 | 711 CarSat1  | red    | na |
| chrUn | 62086652 | 62089102 | 2451 CarSat1 | red    | na |
| chrUn | 62089145 | 62089833 | 689 CarSat1  | red    | na |
| chrUn | 62089863 | 62091775 | 1913 CarSat1 | red    | na |
| chrUn | 62091802 | 62092511 | 710 CarSat1  | red    | na |
| chrUn | 62092537 | 62093006 | 470 CarSat1  | red    | na |
| chrUn | 62093022 | 62093987 | 966 CarSat1  | red    | na |
| chrUn | 62094014 | 62096210 | 2197 CarSat1 | red    | na |
| chrUn | 62096237 | 62097033 | 797 CarSat1  | red    | na |
| chrUn | 62097212 | 62100534 | 3323 CarSat1 | red    | na |
| chrUn | 62141114 | 62142772 | 1659 CarSat1 | red    | na |
| chrUn | 62142797 | 62143266 | 470 CarSat1  | red    | na |
| chrUn | 62143293 | 62144468 | 1176 CarSat1 | red    | na |
| chrUn | 62144498 | 62145477 | 980 CarSat1  | red    | na |
| chrUn | 62145498 | 62146672 | 1175 CarSat1 | red    | na |
| chrUn | 62146709 | 62147193 | 485 CarSat1  | red    | na |
| chrUn | 62147218 | 62148155 | 938 CarSat1  | red    | na |
| chrUn | 62148170 | 62148297 | 128 Carsat2  | orange | na |
| chrUn | 62148185 | 62149162 | 978 CarSat1  | red    | na |
| chrUn | 62149183 | 62151697 | 2515 CarSat1 | red    | na |
| chrUn | 62152599 | 62154327 | 1729 CarSat1 | red    | na |
| chrUn | 62154352 | 62155558 | 1207 CarSat1 | red    | na |
| chrUn | 62155579 | 62158014 | 2436 CarSat1 | red    | na |
| chrUn | 62158039 | 62159556 | 1518 CarSat1 | red    | na |
| chrUn | 62185092 | 62186314 | 1223 CarSat1 | red    | na |
| chrUn | 62186345 | 62187057 | 713 CarSat1  | red    | na |
| chrUn | 62187087 | 62188250 | 1164 CarSat1 | red    | na |
| chrUn | 62188353 | 62188527 | 175 CarSat1  | red    | na |
| chrUn | 62188604 | 62189769 | 1166 CarSat1 | red    | na |
| chrUn | 62189802 | 62190507 | 706 CarSat1  | red    | na |
| chrUn | 62190540 | 62191777 | 1238 CarSat1 | red    | na |
| chrUn | 62191792 | 62192738 | 947 CarSat1  | red    | na |
| chrUn | 62192750 | 62193979 | 1230 CarSat1 | red    | na |



|       |          |          |      |         |        |    |
|-------|----------|----------|------|---------|--------|----|
| chrUn | 62194009 | 62195670 | 1662 | CarSat1 | red    | na |
| chrUn | 62195703 | 62197143 | 1441 | CarSat1 | red    | na |
| chrUn | 62197176 | 62200088 | 2913 | CarSat1 | red    | na |
| chrUn | 62200121 | 62201364 | 1244 | CarSat1 | red    | na |
| chrUn | 62201379 | 62202575 | 1197 | CarSat1 | red    | na |
| chrUn | 62214144 | 62215095 | 952  | CarSat1 | red    | na |
| chrUn | 62215114 | 62215967 | 854  | CarSat1 | red    | na |
| chrUn | 62215986 | 62216765 | 780  | CarSat1 | red    | na |
| chrUn | 62216867 | 62218820 | 1954 | CarSat1 | red    | na |
| chrUn | 62218825 | 62219584 | 760  | SAT1_CF | blue   | na |
| chrUn | 62219579 | 62220302 | 724  | CarSat1 | red    | na |
| chrUn | 62220334 | 62220759 | 426  | CarSat1 | red    | na |
| chrUn | 62222092 | 62225210 | 3119 | SAT1_CF | blue   | na |
| chrUn | 62225253 | 62225751 | 499  | SAT1_CF | blue   | na |
| chrUn | 62225794 | 62226587 | 794  | SAT1_CF | blue   | na |
| chrUn | 62226769 | 62226950 | 182  | SAT1_CF | blue   | na |
| chrUn | 62226990 | 62227489 | 500  | SAT1_CF | blue   | na |
| chrUn | 62227503 | 62228115 | 613  | SAT1_CF | blue   | na |
| chrUn | 62228161 | 62228486 | 326  | SAT1_CF | blue   | na |
| chrUn | 62228547 | 62229888 | 1342 | SAT1_CF | blue   | na |
| chrUn | 62229902 | 62230014 | 113  | SAT1_CF | blue   | na |
| chrUn | 62230035 | 62230589 | 555  | SAT1_CF | blue   | na |
| chrUn | 62230601 | 62231371 | 771  | SAT1_CF | blue   | na |
| chrUn | 62231391 | 62231526 | 136  | SAT1_CF | blue   | na |
| chrUn | 62231787 | 62232168 | 382  | SAT1_CF | blue   | na |
| chrUn | 62232181 | 62232864 | 684  | SAT1_CF | blue   | na |
| chrUn | 62232876 | 62234540 | 1665 | SAT1_CF | blue   | na |
| chrUn | 62234566 | 62235141 | 576  | SAT1_CF | blue   | na |
| chrUn | 62235171 | 62235680 | 510  | SAT1_CF | blue   | na |
| chrUn | 62235718 | 62236588 | 871  | SAT1_CF | blue   | na |
| chrUn | 62236600 | 62238060 | 1461 | SAT1_CF | blue   | na |
| chrUn | 62238091 | 62238597 | 507  | SAT1_CF | blue   | na |
| chrUn | 62238630 | 62238787 | 158  | SAT1_CF | blue   | na |
| chrUn | 62238832 | 62239333 | 502  | SAT1_CF | blue   | na |
| chrUn | 62239345 | 62239831 | 487  | SAT1_CF | blue   | na |
| chrUn | 62254124 | 62255075 | 952  | CarSat1 | red    | na |
| chrUn | 62255233 | 62255945 | 713  | CarSat1 | red    | na |
| chrUn | 62255972 | 62256835 | 864  | CarSat1 | red    | na |
| chrUn | 62256856 | 62257641 | 786  | CarSat1 | red    | na |
| chrUn | 62257853 | 62258306 | 454  | CarSat1 | red    | na |
| chrUn | 62296250 | 62296818 | 569  | CarSat1 | red    | na |
| chrUn | 62296833 | 62296959 | 127  | Carsat2 | orange | na |

|       |          |          |      |         |        |    |
|-------|----------|----------|------|---------|--------|----|
| chrUn | 62296848 | 62298811 | 1964 | CarSat1 | red    | na |
| chrUn | 62298844 | 62300518 | 1675 | CarSat1 | red    | na |
| chrUn | 62300548 | 62304211 | 3664 | CarSat1 | red    | na |
| chrUn | 62304241 | 62305684 | 1444 | CarSat1 | red    | na |
| chrUn | 62305699 | 62305826 | 128  | Carsat2 | orange | na |
| chrUn | 62305714 | 62307158 | 1445 | CarSat1 | red    | na |
| chrUn | 62307173 | 62307299 | 127  | Carsat2 | orange | na |
| chrUn | 62307188 | 62307893 | 706  | CarSat1 | red    | na |
| chrUn | 62307909 | 62308034 | 126  | Carsat2 | orange | na |
| chrUn | 62307923 | 62308628 | 706  | CarSat1 | red    | na |
| chrUn | 62308643 | 62308770 | 128  | Carsat2 | orange | na |
| chrUn | 62308658 | 62309879 | 1222 | CarSat1 | red    | na |
| chrUn | 62309912 | 62311583 | 1672 | CarSat1 | red    | na |
| chrUn | 62311598 | 62311704 | 107  | Carsat2 | orange | na |
| chrUn | 62311613 | 62312320 | 708  | CarSat1 | red    | na |
| chrUn | 62312350 | 62313057 | 708  | CarSat1 | red    | na |
| chrUn | 62313072 | 62313198 | 127  | Carsat2 | orange | na |
| chrUn | 62313087 | 62313844 | 758  | CarSat1 | red    | na |
| chrUn | 62343738 | 62344063 | 326  | SAT1_CF | blue   | na |
| chrUn | 62344141 | 62344648 | 508  | SAT1_CF | blue   | na |
| chrUn | 62344661 | 62345016 | 356  | SAT1_CF | blue   | na |
| chrUn | 62345103 | 62345605 | 503  | SAT1_CF | blue   | na |
| chrUn | 62345618 | 62347405 | 1788 | SAT1_CF | blue   | na |
| chrUn | 62347439 | 62348371 | 933  | SAT1_CF | blue   | na |
| chrUn | 62348444 | 62348964 | 521  | SAT1_CF | blue   | na |
| chrUn | 62348995 | 62349257 | 263  | SAT1_CF | blue   | na |
| chrUn | 62350805 | 62350902 | 98   | SAT1_CF | blue   | na |
| chrUn | 62350947 | 62351447 | 501  | SAT1_CF | blue   | na |
| chrUn | 62351461 | 62352220 | 760  | SAT1_CF | blue   | na |
| chrUn | 62352232 | 62353598 | 1367 | SAT1_CF | blue   | na |
| chrUn | 62353663 | 62354821 | 1159 | SAT1_CF | blue   | na |
| chrUn | 62354832 | 62355443 | 612  | SAT1_CF | blue   | na |
| chrUn | 62355466 | 62356132 | 667  | SAT1_CF | blue   | na |
| chrUn | 62356175 | 62356701 | 527  | SAT1_CF | blue   | na |
| chrUn | 62356723 | 62358217 | 1495 | SAT1_CF | blue   | na |
| chrUn | 62358257 | 62358759 | 503  | SAT1_CF | blue   | na |
| chrUn | 62358772 | 62360114 | 1343 | SAT1_CF | blue   | na |
| chrUn | 62360130 | 62360278 | 149  | SAT1_CF | blue   | na |
| chrUn | 62360292 | 62361728 | 1437 | SAT1_CF | blue   | na |
| chrUn | 62361740 | 62362393 | 654  | SAT1_CF | blue   | na |
| chrUn | 62362477 | 62362616 | 140  | SAT1_CF | blue   | na |
| chrUn | 62363627 | 62366357 | 2731 | CarSat1 | red    | na |

|       |          |          |      |         |        |    |
|-------|----------|----------|------|---------|--------|----|
| chrUn | 62366384 | 62367586 | 1203 | CarSat1 | red    | na |
| chrUn | 62367619 | 62368839 | 1221 | CarSat1 | red    | na |
| chrUn | 62368875 | 62369575 | 701  | CarSat1 | red    | na |
| chrUn | 62369605 | 62371068 | 1464 | CarSat1 | red    | na |
| chrUn | 62371083 | 62374755 | 3673 | CarSat1 | red    | na |
| chrUn | 62374770 | 62379925 | 5156 | CarSat1 | red    | na |
| chrUn | 62379940 | 62380998 | 1059 | CarSat1 | red    | na |
| chrUn | 62381999 | 62383134 | 1136 | CarSat1 | red    | na |
| chrUn | 62383161 | 62383872 | 712  | CarSat1 | red    | na |
| chrUn | 62383899 | 62384610 | 712  | CarSat1 | red    | na |
| chrUn | 62384637 | 62385347 | 711  | CarSat1 | red    | na |
| chrUn | 62385368 | 62386075 | 708  | CarSat1 | red    | na |
| chrUn | 62386102 | 62386813 | 712  | CarSat1 | red    | na |
| chrUn | 62386840 | 62387803 | 964  | CarSat1 | red    | na |
| chrUn | 62387819 | 62388410 | 592  | CarSat1 | red    | na |
| chrUn | 62388702 | 62389409 | 708  | CarSat1 | red    | na |
| chrUn | 62389436 | 62390399 | 964  | CarSat1 | red    | na |
| chrUn | 62390415 | 62391136 | 722  | CarSat1 | red    | na |
| chrUn | 62391152 | 62391874 | 723  | CarSat1 | red    | na |
| chrUn | 62391890 | 62392610 | 721  | CarSat1 | red    | na |
| chrUn | 62392626 | 62394568 | 1943 | CarSat1 | red    | na |
| chrUn | 62394595 | 62396294 | 1700 | CarSat1 | red    | na |
| chrUn | 62396310 | 62397030 | 721  | CarSat1 | red    | na |
| chrUn | 62397046 | 62398505 | 1460 | CarSat1 | red    | na |
| chrUn | 62398521 | 62399654 | 1134 | CarSat1 | red    | na |
| chrUn | 62400665 | 62401360 | 696  | CarSat1 | red    | na |
| chrUn | 62401387 | 62402227 | 841  | CarSat1 | red    | na |
| chrUn | 62403704 | 62404290 | 587  | CarSat1 | red    | na |
| chrUn | 62404317 | 62405195 | 879  | CarSat1 | red    | na |
| chrUn | 62406175 | 62407246 | 1072 | CarSat1 | red    | na |
| chrUn | 62407273 | 62407742 | 470  | CarSat1 | red    | na |
| chrUn | 62407758 | 62408716 | 959  | CarSat1 | red    | na |
| chrUn | 62408743 | 62409722 | 980  | CarSat1 | red    | na |
| chrUn | 62410391 | 62411378 | 988  | CarSat1 | red    | na |
| chrUn | 62411394 | 62412355 | 962  | CarSat1 | red    | na |
| chrUn | 62412382 | 62413631 | 1250 | CarSat1 | red    | na |
| chrUn | 62413647 | 62414364 | 718  | CarSat1 | red    | na |
| chrUn | 62414380 | 62414998 | 619  | CarSat1 | red    | na |
| chrUn | 62415017 | 62415745 | 729  | CarSat1 | red    | na |
| chrUn | 62415775 | 62416873 | 1099 | CarSat1 | red    | na |
| chrUn | 62417066 | 62417779 | 714  | CarSat1 | red    | na |
| chrUn | 62423098 | 62423260 | 163  | Sat2CF  | purple | na |

|       |          |          |              |        |    |
|-------|----------|----------|--------------|--------|----|
| chrUn | 62423119 | 62423469 | 351 Sat2CF   | purple | na |
| chrUn | 62423166 | 62423466 | 301 Sat2CF   | purple | na |
| chrUn | 62433929 | 62436165 | 2237 CarSat1 | red    | na |
| chrUn | 62436186 | 62437782 | 1597 CarSat1 | red    | na |
| chrUn | 62437803 | 62439312 | 1510 CarSat1 | red    | na |
| chrUn | 62439412 | 62440895 | 1484 CarSat1 | red    | na |
| chrUn | 62440897 | 62441798 | 902 SAT1_CF  | blue   | na |
| chrUn | 62446641 | 62447594 | 954 CarSat1  | red    | na |
| chrUn | 62447745 | 62449183 | 1439 CarSat1 | red    | na |
| chrUn | 62449343 | 62449986 | 644 CarSat1  | red    | na |
| chrUn | 62450050 | 62450956 | 907 CarSat1  | red    | na |
| chrUn | 62450977 | 62452019 | 1043 CarSat1 | red    | na |
| chrUn | 62452056 | 62453963 | 1908 CarSat1 | red    | na |
| chrUn | 62453990 | 62455055 | 1066 CarSat1 | red    | na |
| chrUn | 62455136 | 62458260 | 3125 CarSat1 | red    | na |
| chrUn | 62458439 | 62458921 | 483 CarSat1  | red    | na |
| chrUn | 62458946 | 62460134 | 1189 CarSat1 | red    | na |
| chrUn | 62465419 | 62466330 | 912 CarSat1  | red    | na |
| chrUn | 62466351 | 62467935 | 1585 CarSat1 | red    | na |
| chrUn | 62467956 | 62468811 | 856 CarSat1  | red    | na |
| chrUn | 62468832 | 62470422 | 1591 CarSat1 | red    | na |
| chrUn | 62470443 | 62472034 | 1592 CarSat1 | red    | na |
| chrUn | 62497598 | 62498210 | 613 SAT1_CF  | blue   | na |
| chrUn | 62498228 | 62498887 | 660 SAT1_CF  | blue   | na |
| chrUn | 62498939 | 62499220 | 282 SAT1_CF  | blue   | na |
| chrUn | 62499400 | 62499676 | 277 SAT1_CF  | blue   | na |
| chrUn | 62499689 | 62500805 | 1117 SAT1_CF | blue   | na |
| chrUn | 62500823 | 62501514 | 692 SAT1_CF  | blue   | na |
| chrUn | 62501561 | 62502080 | 520 SAT1_CF  | blue   | na |
| chrUn | 62502093 | 62502768 | 676 SAT1_CF  | blue   | na |
| chrUn | 62502811 | 62503531 | 721 SAT1_CF  | blue   | na |
| chrUn | 62503582 | 62504117 | 536 SAT1_CF  | blue   | na |
| chrUn | 62504139 | 62504657 | 519 SAT1_CF  | blue   | na |
| chrUn | 62504669 | 62505985 | 1317 SAT1_CF | blue   | na |
| chrUn | 62505998 | 62506830 | 833 SAT1_CF  | blue   | na |
| chrUn | 62506843 | 62507546 | 704 SAT1_CF  | blue   | na |
| chrUn | 62507558 | 62509145 | 1588 SAT1_CF | blue   | na |
| chrUn | 62509176 | 62510097 | 922 SAT1_CF  | blue   | na |
| chrUn | 62510137 | 62511153 | 1017 SAT1_CF | blue   | na |
| chrUn | 62511201 | 62512481 | 1281 SAT1_CF | blue   | na |
| chrUn | 62512569 | 62513070 | 502 SAT1_CF  | blue   | na |
| chrUn | 62513083 | 62514269 | 1187 SAT1_CF | blue   | na |

|       |          |          |              |      |    |
|-------|----------|----------|--------------|------|----|
| chrUn | 62514283 | 62514789 | 507 SAT1_CF  | blue | na |
| chrUn | 62515811 | 62517077 | 1267 CarSat1 | red  | na |
| chrUn | 62517104 | 62517814 | 711 CarSat1  | red  | na |
| chrUn | 62517841 | 62518550 | 710 CarSat1  | red  | na |
| chrUn | 62518576 | 62519773 | 1198 CarSat1 | red  | na |
| chrUn | 62519798 | 62521496 | 1699 CarSat1 | red  | na |
| chrUn | 62521523 | 62521990 | 468 CarSat1  | red  | na |
| chrUn | 62522006 | 62522966 | 961 CarSat1  | red  | na |
| chrUn | 62522993 | 62524186 | 1194 CarSat1 | red  | na |
| chrUn | 62524211 | 62525911 | 1701 CarSat1 | red  | na |
| chrUn | 62525943 | 62528854 | 2912 CarSat1 | red  | na |
| chrUn | 62528881 | 62529590 | 710 CarSat1  | red  | na |
| chrUn | 62529617 | 62530326 | 710 CarSat1  | red  | na |
| chrUn | 62530353 | 62532970 | 2618 CarSat1 | red  | na |
| chrUn | 62533970 | 62534935 | 966 CarSat1  | red  | na |
| chrUn | 62534965 | 62535900 | 936 CarSat1  | red  | na |
| chrUn | 62535916 | 62537144 | 1229 CarSat1 | red  | na |
| chrUn | 62537174 | 62539088 | 1915 CarSat1 | red  | na |
| chrUn | 62539115 | 62539830 | 716 CarSat1  | red  | na |
| chrUn | 62539852 | 62540562 | 711 CarSat1  | red  | na |
| chrUn | 62540589 | 62541299 | 711 CarSat1  | red  | na |
| chrUn | 62541326 | 62542305 | 980 CarSat1  | red  | na |
| chrUn | 62542335 | 62544250 | 1916 CarSat1 | red  | na |
| chrUn | 62544277 | 62545722 | 1446 CarSat1 | red  | na |
| chrUn | 62545749 | 62546218 | 470 CarSat1  | red  | na |
| chrUn | 62546234 | 62547196 | 963 CarSat1  | red  | na |
| chrUn | 62547223 | 62547921 | 699 CarSat1  | red  | na |
| chrUn | 62547948 | 62548658 | 711 CarSat1  | red  | na |
| chrUn | 62548685 | 62549144 | 460 CarSat1  | red  | na |
| chrUn | 62549169 | 62550132 | 964 CarSat1  | red  | na |
| chrUn | 62550159 | 62551138 | 980 CarSat1  | red  | na |
| chrUn | 62552141 | 62553219 | 1079 CarSat1 | red  | na |
| chrUn | 62553250 | 62554450 | 1201 CarSat1 | red  | na |
| chrUn | 62554466 | 62555428 | 963 CarSat1  | red  | na |
| chrUn | 62555455 | 62556165 | 711 CarSat1  | red  | na |
| chrUn | 62556192 | 62556900 | 709 CarSat1  | red  | na |
| chrUn | 62556927 | 62558134 | 1208 CarSat1 | red  | na |
| chrUn | 62558150 | 62559112 | 963 CarSat1  | red  | na |
| chrUn | 62559139 | 62559849 | 711 CarSat1  | red  | na |
| chrUn | 62559876 | 62561083 | 1208 CarSat1 | red  | na |
| chrUn | 62561099 | 62561821 | 723 CarSat1  | red  | na |
| chrUn | 62561837 | 62562557 | 721 CarSat1  | red  | na |

|       |          |          |      |         |        |    |
|-------|----------|----------|------|---------|--------|----|
| chrUn | 62562574 | 62563295 | 722  | CarSat1 | red    | na |
| chrUn | 62563311 | 62564032 | 722  | CarSat1 | red    | na |
| chrUn | 62564048 | 62565750 | 1703 | CarSat1 | red    | na |
| chrUn | 62565777 | 62569303 | 3527 | CarSat1 | red    | na |
| chrUn | 62570310 | 62570959 | 650  | SAT1_CF | blue   | na |
| chrUn | 62570971 | 62573317 | 2347 | SAT1_CF | blue   | na |
| chrUn | 62573359 | 62573524 | 166  | SAT1_CF | blue   | na |
| chrUn | 62573706 | 62573891 | 186  | SAT1_CF | blue   | na |
| chrUn | 62573908 | 62574428 | 521  | SAT1_CF | blue   | na |
| chrUn | 62574441 | 62574549 | 109  | SAT1_CF | blue   | na |
| chrUn | 62574569 | 62577650 | 3082 | SAT1_CF | blue   | na |
| chrUn | 62577662 | 62578140 | 479  | SAT1_CF | blue   | na |
| chrUn | 62578320 | 62578544 | 225  | SAT1_CF | blue   | na |
| chrUn | 62578556 | 62580514 | 1959 | SAT1_CF | blue   | na |
| chrUn | 62580525 | 62582201 | 1677 | SAT1_CF | blue   | na |
| chrUn | 62582254 | 62582755 | 502  | SAT1_CF | blue   | na |
| chrUn | 62582782 | 62583526 | 745  | SAT1_CF | blue   | na |
| chrUn | 62583538 | 62584399 | 862  | SAT1_CF | blue   | na |
| chrUn | 62584442 | 62585516 | 1075 | SAT1_CF | blue   | na |
| chrUn | 62585559 | 62586082 | 524  | SAT1_CF | blue   | na |
| chrUn | 62586097 | 62586233 | 137  | SAT1_CF | blue   | na |
| chrUn | 62586299 | 62587433 | 1135 | SAT1_CF | blue   | na |
| chrUn | 62588539 | 62589941 | 1403 | CarSat1 | red    | na |
| chrUn | 62589968 | 62591414 | 1447 | CarSat1 | red    | na |
| chrUn | 62591441 | 62591911 | 471  | CarSat1 | red    | na |
| chrUn | 62591927 | 62592877 | 951  | CarSat1 | red    | na |
| chrUn | 62592916 | 62594365 | 1450 | CarSat1 | red    | na |
| chrUn | 62594392 | 62595840 | 1449 | CarSat1 | red    | na |
| chrUn | 62595867 | 62596577 | 711  | CarSat1 | red    | na |
| chrUn | 62596604 | 62597313 | 710  | CarSat1 | red    | na |
| chrUn | 62597340 | 62597800 | 461  | CarSat1 | red    | na |
| chrUn | 62597825 | 62598787 | 963  | CarSat1 | red    | na |
| chrUn | 62598814 | 62599792 | 979  | CarSat1 | red    | na |
| chrUn | 62599822 | 62600262 | 441  | CarSat1 | red    | na |
| chrUn | 62600289 | 62600749 | 461  | CarSat1 | red    | na |
| chrUn | 62600774 | 62601733 | 960  | CarSat1 | red    | na |
| chrUn | 62601760 | 62602966 | 1207 | CarSat1 | red    | na |
| chrUn | 62602982 | 62604438 | 1457 | CarSat1 | red    | na |
| chrUn | 62604453 | 62605550 | 1098 | CarSat1 | red    | na |
| chrUn | 62620894 | 62621967 | 1074 | Sat2CF  | purple | na |
| chrUn | 62626289 | 62626493 | 205  | SAT1_CF | blue   | na |
| chrUn | 62626601 | 62627894 | 1294 | SAT1_CF | blue   | na |

|       |          |          |              |      |    |
|-------|----------|----------|--------------|------|----|
| chrUn | 62627907 | 62628408 | 502 SAT1_CF  | blue | na |
| chrUn | 62628461 | 62631065 | 2605 SAT1_CF | blue | na |
| chrUn | 62631134 | 62631932 | 799 SAT1_CF  | blue | na |
| chrUn | 62631978 | 62633308 | 1331 SAT1_CF | blue | na |
| chrUn | 62633321 | 62633823 | 503 SAT1_CF  | blue | na |
| chrUn | 62633863 | 62635235 | 1373 SAT1_CF | blue | na |
| chrUn | 62635259 | 62636626 | 1368 SAT1_CF | blue | na |
| chrUn | 62636638 | 62637085 | 448 SAT1_CF  | blue | na |
| chrUn | 62638091 | 62638578 | 488 SAT1_CF  | blue | na |
| chrUn | 62638592 | 62638821 | 230 SAT1_CF  | blue | na |
| chrUn | 62639215 | 62639326 | 112 SAT1_CF  | blue | na |
| chrUn | 62639348 | 62639453 | 106 SAT1_CF  | blue | na |
| chrUn | 62639466 | 62639965 | 500 SAT1_CF  | blue | na |
| chrUn | 62640969 | 62641960 | 992 SAT1_CF  | blue | na |
| chrUn | 62642401 | 62644521 | 2121 SAT1_CF | blue | na |
| chrUn | 62644546 | 62645566 | 1021 SAT1_CF | blue | na |
| chrUn | 62646571 | 62647295 | 725 CarSat1  | red  | na |
| chrUn | 62647476 | 62649640 | 2165 CarSat1 | red  | na |
| chrUn | 62649661 | 62652839 | 3179 CarSat1 | red  | na |
| chrUn | 62652869 | 62655512 | 2644 CarSat1 | red  | na |
| chrUn | 62655560 | 62656511 | 952 CarSat1  | red  | na |
| chrUn | 62656541 | 62659473 | 2933 CarSat1 | red  | na |
| chrUn | 62659488 | 62660931 | 1444 CarSat1 | red  | na |
| chrUn | 62660961 | 62661682 | 722 CarSat1  | red  | na |
| chrUn | 62661697 | 62662419 | 723 CarSat1  | red  | na |
| chrUn | 62662434 | 62663140 | 707 CarSat1  | red  | na |
| chrUn | 62663170 | 62663615 | 446 CarSat1  | red  | na |
| chrUn | 62669026 | 62669903 | 878 CarSat1  | red  | na |
| chrUn | 62670337 | 62671062 | 726 CarSat1  | red  | na |
| chrUn | 62671083 | 62671852 | 770 CarSat1  | red  | na |
| chrUn | 62671878 | 62672673 | 796 CarSat1  | red  | na |
| chrUn | 62672694 | 62673469 | 776 CarSat1  | red  | na |
| chrUn | 62673487 | 62674284 | 798 CarSat1  | red  | na |
| chrUn | 62674303 | 62676266 | 1964 CarSat1 | red  | na |
| chrUn | 62676270 | 62677345 | 1076 SAT1_CF | blue | na |
| chrUn | 62677387 | 62678699 | 1313 SAT1_CF | blue | na |
| chrUn | 62678728 | 62679860 | 1133 SAT1_CF | blue | na |
| chrUn | 62679904 | 62680390 | 487 SAT1_CF  | blue | na |
| chrUn | 62680385 | 62681109 | 725 CarSat1  | red  | na |
| chrUn | 62681141 | 62681567 | 427 CarSat1  | red  | na |
| chrUn | 62719483 | 62720532 | 1050 CarSat1 | red  | na |
| chrUn | 62720553 | 62721545 | 993 CarSat1  | red  | na |

|       |          |          |      |         |        |    |
|-------|----------|----------|------|---------|--------|----|
| chrUn | 62721561 | 62722488 | 928  | CarSat1 | red    | na |
| chrUn | 62722521 | 62723743 | 1223 | CarSat1 | red    | na |
| chrUn | 62723773 | 62724496 | 724  | CarSat1 | red    | na |
| chrUn | 62724518 | 62726924 | 2407 | CarSat1 | red    | na |
| chrUn | 62726948 | 62729658 | 2711 | CarSat1 | red    | na |
| chrUn | 62729673 | 62732075 | 2403 | CarSat1 | red    | na |
| chrUn | 62732099 | 62734290 | 2192 | CarSat1 | red    | na |
| chrUn | 62734314 | 62735027 | 714  | CarSat1 | red    | na |
| chrUn | 62735051 | 62735536 | 486  | CarSat1 | red    | na |
| chrUn | 62735566 | 62736342 | 777  | CarSat1 | red    | na |
| chrUn | 62737349 | 62738481 | 1133 | CarSat1 | red    | na |
| chrUn | 62738505 | 62739740 | 1236 | CarSat1 | red    | na |
| chrUn | 62739755 | 62741669 | 1915 | CarSat1 | red    | na |
| chrUn | 62741690 | 62742160 | 471  | CarSat1 | red    | na |
| chrUn | 62742184 | 62743913 | 1730 | CarSat1 | red    | na |
| chrUn | 62744136 | 62744830 | 695  | CarSat1 | red    | na |
| chrUn | 62744857 | 62745326 | 470  | CarSat1 | red    | na |
| chrUn | 62745342 | 62746579 | 1238 | CarSat1 | red    | na |
| chrUn | 62746609 | 62747321 | 713  | CarSat1 | red    | na |
| chrUn | 62747351 | 62748799 | 1449 | CarSat1 | red    | na |
| chrUn | 62748829 | 62750502 | 1674 | CarSat1 | red    | na |
| chrUn | 62750526 | 62751026 | 501  | CarSat1 | red    | na |
| chrUn | 62751041 | 62751768 | 728  | CarSat1 | red    | na |
| chrUn | 62751783 | 62754136 | 2354 | CarSat1 | red    | na |
| chrUn | 62772954 | 62773595 | 642  | CarSat1 | red    | na |
| chrUn | 62773622 | 62774316 | 695  | CarSat1 | red    | na |
| chrUn | 62774359 | 62775068 | 710  | CarSat1 | red    | na |
| chrUn | 62775095 | 62775805 | 711  | CarSat1 | red    | na |
| chrUn | 62775832 | 62776525 | 694  | CarSat1 | red    | na |
| chrUn | 62776567 | 62778013 | 1447 | CarSat1 | red    | na |
| chrUn | 62778040 | 62778749 | 710  | CarSat1 | red    | na |
| chrUn | 62778776 | 62779486 | 711  | CarSat1 | red    | na |
| chrUn | 62779513 | 62780804 | 1292 | CarSat1 | red    | na |
| chrUn | 62784354 | 62785041 | 688  | CarSat1 | red    | na |
| chrUn | 62785068 | 62786513 | 1446 | CarSat1 | red    | na |
| chrUn | 62786540 | 62786979 | 440  | CarSat1 | red    | na |
| chrUn | 62786995 | 62787117 | 123  | Carsat2 | orange | na |
| chrUn | 62787009 | 62787983 | 975  | CarSat1 | red    | na |
| chrUn | 62788010 | 62789710 | 1701 | CarSat1 | red    | na |
| chrUn | 62789752 | 62792060 | 2309 | CarSat1 | red    | na |
| chrUn | 62792085 | 62793144 | 1060 | CarSat1 | red    | na |
| chrUn | 62794162 | 62800381 | 6220 | CarSat1 | red    | na |



|       |          |          |      |         |      |    |
|-------|----------|----------|------|---------|------|----|
| chrUn | 62800402 | 62807504 | 7103 | CarSat1 | red  | na |
| chrUn | 62807521 | 62808228 | 708  | CarSat1 | red  | na |
| chrUn | 62808253 | 62808963 | 711  | CarSat1 | red  | na |
| chrUn | 62808988 | 62810897 | 1910 | CarSat1 | red  | na |
| chrUn | 62818352 | 62819081 | 730  | Sat79CF | na   | na |
| chrUn | 62818390 | 62819081 | 692  | Sat79CF | na   | na |
| chrUn | 62818422 | 62819168 | 747  | Sat18CF | na   | na |
| chrUn | 62818549 | 62819168 | 620  | Sat18CF | na   | na |
| chrUn | 62832932 | 62834976 | 2045 | SAT1_CF | blue | na |
| chrUn | 62834987 | 62835306 | 320  | SAT1_CF | blue | na |
| chrUn | 62835379 | 62836146 | 768  | SAT1_CF | blue | na |
| chrUn | 62836164 | 62836832 | 669  | SAT1_CF | blue | na |
| chrUn | 62836875 | 62837893 | 1019 | SAT1_CF | blue | na |
| chrUn | 62837990 | 62838538 | 549  | SAT1_CF | blue | na |
| chrUn | 62838617 | 62839157 | 541  | SAT1_CF | blue | na |
| chrUn | 62839537 | 62841569 | 2033 | SAT1_CF | blue | na |
| chrUn | 62841582 | 62841922 | 341  | SAT1_CF | blue | na |
| chrUn | 62842058 | 62842955 | 898  | SAT1_CF | blue | na |
| chrUn | 62842982 | 62843161 | 180  | SAT1_CF | blue | na |
| chrUn | 62844156 | 62845392 | 1237 | SAT1_CF | blue | na |
| chrUn | 62846794 | 62847061 | 268  | SAT1_CF | blue | na |
| chrUn | 62847074 | 62847757 | 684  | SAT1_CF | blue | na |
| chrUn | 62847769 | 62848452 | 684  | SAT1_CF | blue | na |
| chrUn | 62848464 | 62849121 | 658  | SAT1_CF | blue | na |
| chrUn | 62849165 | 62850234 | 1070 | SAT1_CF | blue | na |
| chrUn | 62850257 | 62851510 | 1254 | SAT1_CF | blue | na |
| chrUn | 62851523 | 62851732 | 210  | SAT1_CF | blue | na |
| chrUn | 62851746 | 62852292 | 547  | SAT1_CF | blue | na |
| chrUn | 62852303 | 62852415 | 113  | SAT1_CF | blue | na |
| chrUn | 62853442 | 62854976 | 1535 | CarSat1 | red  | na |
| chrUn | 62855006 | 62857183 | 2178 | CarSat1 | red  | na |
| chrUn | 62857213 | 62857919 | 707  | CarSat1 | red  | na |
| chrUn | 62857949 | 62859458 | 1510 | CarSat1 | red  | na |
| chrUn | 62860719 | 62860803 | 85   | CarSat1 | red  | na |
| chrUn | 62860985 | 62862620 | 1636 | CarSat1 | red  | na |
| chrUn | 62862645 | 62863357 | 713  | CarSat1 | red  | na |
| chrUn | 62863382 | 62864342 | 961  | CarSat1 | red  | na |
| chrUn | 62864369 | 62865079 | 711  | CarSat1 | red  | na |
| chrUn | 62865106 | 62866083 | 978  | CarSat1 | red  | na |
| chrUn | 62866113 | 62869045 | 2933 | CarSat1 | red  | na |
| chrUn | 62869060 | 62869787 | 728  | CarSat1 | red  | na |
| chrUn | 62869802 | 62871332 | 1531 | CarSat1 | red  | na |

|       |          |          |              |        |    |
|-------|----------|----------|--------------|--------|----|
| chrUn | 62883119 | 62883839 | 721 SAT1_CF  | blue   | na |
| chrUn | 62883882 | 62885584 | 1703 SAT1_CF | blue   | na |
| chrUn | 62885596 | 62885913 | 318 SAT1_CF  | blue   | na |
| chrUn | 62885926 | 62887042 | 1117 SAT1_CF | blue   | na |
| chrUn | 62887088 | 62887581 | 494 SAT1_CF  | blue   | na |
| chrUn | 62887567 | 62888290 | 724 CarSat1  | red    | na |
| chrUn | 62888449 | 62888748 | 300 CarSat1  | red    | na |
| chrUn | 62889987 | 62890093 | 107 Carsat2  | orange | na |
| chrUn | 62890012 | 62891118 | 1107 CarSat1 | red    | na |
| chrUn | 62891133 | 62891260 | 128 Carsat2  | orange | na |
| chrUn | 62891148 | 62891634 | 487 CarSat1  | red    | na |
| chrUn | 62891667 | 62892370 | 704 CarSat1  | red    | na |
| chrUn | 62892403 | 62893322 | 920 CarSat1  | red    | na |
| chrUn | 62893359 | 62894068 | 710 CarSat1  | red    | na |
| chrUn | 62894083 | 62894210 | 128 Carsat2  | orange | na |
| chrUn | 62894099 | 62894585 | 487 CarSat1  | red    | na |
| chrUn | 62894609 | 62896268 | 1660 CarSat1 | red    | na |
| chrUn | 62896293 | 62896420 | 128 Carsat2  | orange | na |
| chrUn | 62896308 | 62897014 | 707 CarSat1  | red    | na |
| chrUn | 62897029 | 62897155 | 127 Carsat2  | orange | na |
| chrUn | 62897044 | 62897749 | 706 CarSat1  | red    | na |
| chrUn | 62897763 | 62897889 | 127 Carsat2  | orange | na |
| chrUn | 62897778 | 62898262 | 485 CarSat1  | red    | na |
| chrUn | 62898295 | 62899226 | 932 CarSat1  | red    | na |
| chrUn | 62899256 | 62899963 | 708 CarSat1  | red    | na |
| chrUn | 62899978 | 62900104 | 127 Carsat2  | orange | na |
| chrUn | 62899993 | 62900697 | 705 CarSat1  | red    | na |
| chrUn | 62900712 | 62900827 | 116 Carsat2  | orange | na |
| chrUn | 62900727 | 62901212 | 486 CarSat1  | red    | na |
| chrUn | 62901245 | 62902169 | 925 CarSat1  | red    | na |
| chrUn | 62902184 | 62902310 | 127 Carsat2  | orange | na |
| chrUn | 62902199 | 62902910 | 712 CarSat1  | red    | na |
| chrUn | 62902925 | 62903052 | 128 Carsat2  | orange | na |
| chrUn | 62902940 | 62903648 | 709 CarSat1  | red    | na |
| chrUn | 62903678 | 62905641 | 1964 CarSat1 | red    | na |
| chrUn | 62905660 | 62906606 | 947 CarSat1  | red    | na |
| chrUn | 62931958 | 62934068 | 2111 CarSat1 | red    | na |
| chrUn | 62934093 | 62935783 | 1691 CarSat1 | red    | na |
| chrUn | 62935810 | 62937008 | 1199 CarSat1 | red    | na |
| chrUn | 62937033 | 62937526 | 494 CarSat1  | red    | na |
| chrUn | 62937563 | 62938730 | 1168 CarSat1 | red    | na |
| chrUn | 62938757 | 62942175 | 3419 CarSat1 | red    | na |

|       |          |          |      |         |        |    |
|-------|----------|----------|------|---------|--------|----|
| chrUn | 62942200 | 62947325 | 5126 | CarSat1 | red    | na |
| chrUn | 62947350 | 62948514 | 1165 | CarSat1 | red    | na |
| chrUn | 62953869 | 62954616 | 748  | CarSat1 | red    | na |
| chrUn | 62954645 | 62956138 | 1494 | CarSat1 | red    | na |
| chrUn | 62965694 | 62966009 | 316  | SAT1_CF | blue   | na |
| chrUn | 62978407 | 62978786 | 380  | Sat2CF  | purple | na |
| chrUn | 62978461 | 62979251 | 791  | Sat2CF  | purple | na |
| chrUn | 62984629 | 62985745 | 1117 | CarSat1 | red    | na |
| chrUn | 62985770 | 62986473 | 704  | CarSat1 | red    | na |
| chrUn | 62986498 | 62987460 | 963  | CarSat1 | red    | na |
| chrUn | 62987487 | 62988935 | 1449 | CarSat1 | red    | na |
| chrUn | 62988962 | 62989673 | 712  | CarSat1 | red    | na |
| chrUn | 62989700 | 62990740 | 1041 | CarSat1 | red    | na |
| chrUn | 62990987 | 62993345 | 2359 | CarSat1 | red    | na |
| chrUn | 62993371 | 62994616 | 1246 | CarSat1 | red    | na |
| chrUn | 62994635 | 62995336 | 702  | CarSat1 | red    | na |
| chrUn | 62995366 | 62998512 | 3147 | CarSat1 | red    | na |
| chrUn | 62998536 | 62999386 | 851  | CarSat1 | red    | na |
| chrUn | 62999586 | 63000285 | 700  | CarSat1 | red    | na |
| chrUn | 63052061 | 63052327 | 267  | Sat2CF  | purple | na |
| chrUn | 63052062 | 63052291 | 230  | Sat2CF  | purple | na |
| chrUn | 63115323 | 63117728 | 2406 | CarSat1 | red    | na |
| chrUn | 63117758 | 63118462 | 705  | CarSat1 | red    | na |
| chrUn | 63118492 | 63119196 | 705  | CarSat1 | red    | na |
| chrUn | 63119230 | 63122404 | 3175 | CarSat1 | red    | na |
| chrUn | 63124241 | 63125016 | 776  | CarSat1 | red    | na |
| chrUn | 63125050 | 63125751 | 702  | CarSat1 | red    | na |
| chrUn | 63125788 | 63126222 | 435  | CarSat1 | red    | na |
| chrUn | 63126243 | 63127221 | 979  | CarSat1 | red    | na |
| chrUn | 63127255 | 63128690 | 1436 | CarSat1 | red    | na |
| chrUn | 63128724 | 63129161 | 438  | CarSat1 | red    | na |
| chrUn | 63129209 | 63130160 | 952  | CarSat1 | red    | na |
| chrUn | 63130197 | 63130895 | 699  | CarSat1 | red    | na |
| chrUn | 63130925 | 63131629 | 705  | CarSat1 | red    | na |
| chrUn | 63131663 | 63133094 | 1432 | CarSat1 | red    | na |
| chrUn | 63133136 | 63133571 | 436  | CarSat1 | red    | na |
| chrUn | 63144625 | 63145502 | 878  | CarSat1 | red    | na |
| chrUn | 63145741 | 63147184 | 1444 | CarSat1 | red    | na |
| chrUn | 63147215 | 63148803 | 1589 | CarSat1 | red    | na |
| chrUn | 63148834 | 63150418 | 1585 | CarSat1 | red    | na |
| chrUn | 63150449 | 63151055 | 607  | CarSat1 | red    | na |
| chrUn | 63180631 | 63181585 | 955  | CarSat1 | red    | na |

|       |          |          |      |         |        |    |
|-------|----------|----------|------|---------|--------|----|
| chrUn | 63181604 | 63182394 | 791  | CarSat1 | red    | na |
| chrUn | 63182544 | 63184005 | 1462 | CarSat1 | red    | na |
| chrUn | 63184166 | 63184871 | 706  | CarSat1 | red    | na |
| chrUn | 63184892 | 63185726 | 835  | CarSat1 | red    | na |
| chrUn | 63185747 | 63187730 | 1984 | CarSat1 | red    | na |
| chrUn | 63187780 | 63188107 | 328  | SAT1_CF | blue   | na |
| chrUn | 63188177 | 63190289 | 2113 | SAT1_CF | blue   | na |
| chrUn | 63190302 | 63190915 | 614  | SAT1_CF | blue   | na |
| chrUn | 63190910 | 63191634 | 725  | CarSat1 | red    | na |
| chrUn | 63210273 | 63210856 | 584  | CarSat1 | red    | na |
| chrUn | 63210883 | 63211592 | 710  | CarSat1 | red    | na |
| chrUn | 63211619 | 63212825 | 1207 | CarSat1 | red    | na |
| chrUn | 63212841 | 63215037 | 2197 | CarSat1 | red    | na |
| chrUn | 63215053 | 63216014 | 962  | CarSat1 | red    | na |
| chrUn | 63216041 | 63217984 | 1944 | CarSat1 | red    | na |
| chrUn | 63218000 | 63221669 | 3670 | CarSat1 | red    | na |
| chrUn | 63221685 | 63222406 | 722  | CarSat1 | red    | na |
| chrUn | 63222422 | 63223142 | 721  | CarSat1 | red    | na |
| chrUn | 63223158 | 63223878 | 721  | CarSat1 | red    | na |
| chrUn | 63223894 | 63224606 | 713  | CarSat1 | red    | na |
| chrUn | 63224639 | 63226592 | 1954 | CarSat1 | red    | na |
| chrUn | 63227912 | 63229282 | 1371 | CarSat1 | red    | na |
| chrUn | 63229476 | 63229742 | 267  | CarSat1 | red    | na |
| chrUn | 63231367 | 63232133 | 767  | CarSat1 | red    | na |
| chrUn | 63232158 | 63232710 | 553  | CarSat1 | red    | na |
| chrUn | 63233128 | 63237762 | 4635 | CarSat1 | red    | na |
| chrUn | 63239577 | 63240527 | 951  | CarSat1 | red    | na |
| chrUn | 63241850 | 63242382 | 533  | CarSat1 | red    | na |
| chrUn | 63242415 | 63243376 | 962  | CarSat1 | red    | na |
| chrUn | 63243413 | 63244330 | 918  | CarSat1 | red    | na |
| chrUn | 63244356 | 63245075 | 720  | CarSat1 | red    | na |
| chrUn | 63245099 | 63246304 | 1206 | CarSat1 | red    | na |
| chrUn | 63246582 | 63248498 | 1917 | CarSat1 | red    | na |
| chrUn | 63248535 | 63249338 | 804  | CarSat1 | red    | na |
| chrUn | 63250362 | 63252233 | 1872 | CarSat1 | red    | na |
| chrUn | 63254233 | 63255512 | 1280 | CarSat1 | red    | na |
| chrUn | 63255527 | 63255653 | 127  | Carsat2 | orange | na |
| chrUn | 63255542 | 63256247 | 706  | CarSat1 | red    | na |
| chrUn | 63256262 | 63256388 | 127  | Carsat2 | orange | na |
| chrUn | 63256277 | 63256761 | 485  | CarSat1 | red    | na |
| chrUn | 63257025 | 63258946 | 1922 | CarSat1 | red    | na |
| chrUn | 63260724 | 63262107 | 1384 | CarSat1 | red    | na |

|       |          |          |      |         |      |    |
|-------|----------|----------|------|---------|------|----|
| chrUn | 63262133 | 63262547 | 415  | CarSat1 | red  | na |
| chrUn | 63263945 | 63264783 | 839  | CarSat1 | red  | na |
| chrUn | 63264809 | 63267465 | 2657 | CarSat1 | red  | na |
| chrUn | 63267495 | 63268201 | 707  | CarSat1 | red  | na |
| chrUn | 63268231 | 63271661 | 3431 | CarSat1 | red  | na |
| chrUn | 63271695 | 63272272 | 578  | CarSat1 | red  | na |
| chrUn | 63297485 | 63297994 | 510  | SAT1_CF | blue | na |
| chrUn | 63298007 | 63298409 | 403  | SAT1_CF | blue | na |
| chrUn | 63298469 | 63299228 | 760  | SAT1_CF | blue | na |
| chrUn | 63301674 | 63302208 | 535  | SAT1_CF | blue | na |
| chrUn | 63302220 | 63302328 | 109  | SAT1_CF | blue | na |
| chrUn | 63302349 | 63302978 | 630  | SAT1_CF | blue | na |
| chrUn | 63302992 | 63304323 | 1332 | SAT1_CF | blue | na |
| chrUn | 63304367 | 63304706 | 340  | SAT1_CF | blue | na |
| chrUn | 63304750 | 63305291 | 542  | SAT1_CF | blue | na |
| chrUn | 63305311 | 63306148 | 838  | SAT1_CF | blue | na |
| chrUn | 63306161 | 63306779 | 619  | SAT1_CF | blue | na |
| chrUn | 63306820 | 63307870 | 1051 | SAT1_CF | blue | na |
| chrUn | 63307882 | 63309036 | 1155 | SAT1_CF | blue | na |
| chrUn | 63309048 | 63309713 | 666  | SAT1_CF | blue | na |
| chrUn | 63309756 | 63310526 | 771  | SAT1_CF | blue | na |
| chrUn | 63312683 | 63314112 | 1430 | SAT1_CF | blue | na |
| chrUn | 63315037 | 63315691 | 655  | SAT1_CF | blue | na |
| chrUn | 63315773 | 63316315 | 543  | SAT1_CF | blue | na |
| chrUn | 63316329 | 63317329 | 1001 | SAT1_CF | blue | na |
| chrUn | 63317357 | 63318564 | 1208 | SAT1_CF | blue | na |
| chrUn | 63318775 | 63318917 | 143  | SAT1_CF | blue | na |
| chrUn | 63318977 | 63319408 | 432  | SAT1_CF | blue | na |
| chrUn | 63354997 | 63355323 | 327  | SAT1_CF | blue | na |
| chrUn | 63355336 | 63355443 | 108  | SAT1_CF | blue | na |
| chrUn | 63355465 | 63356038 | 574  | SAT1_CF | blue | na |
| chrUn | 63361563 | 63361727 | 165  | SAT1_CF | blue | na |
| chrUn | 63361906 | 63362061 | 156  | SAT1_CF | blue | na |
| chrUn | 63362105 | 63362651 | 547  | SAT1_CF | blue | na |
| chrUn | 63362709 | 63363976 | 1268 | SAT1_CF | blue | na |
| chrUn | 63364476 | 63364553 | 78   | SAT1_CF | blue | na |
| chrUn | 63364636 | 63365156 | 521  | SAT1_CF | blue | na |
| chrUn | 63365187 | 63365970 | 784  | SAT1_CF | blue | na |
| chrUn | 63371016 | 63371239 | 224  | SAT1_CF | blue | na |
| chrUn | 63371310 | 63371941 | 632  | SAT1_CF | blue | na |
| chrUn | 63371959 | 63373609 | 1651 | SAT1_CF | blue | na |
| chrUn | 63373621 | 63374987 | 1367 | SAT1_CF | blue | na |

|       |          |          |              |        |    |
|-------|----------|----------|--------------|--------|----|
| chrUn | 63375003 | 63375164 | 162 SAT1_CF  | blue   | na |
| chrUn | 63379490 | 63380182 | 693 SAT1_CF  | blue   | na |
| chrUn | 63380195 | 63382150 | 1956 SAT1_CF | blue   | na |
| chrUn | 63384694 | 63385815 | 1122 SAT1_CF | blue   | na |
| chrUn | 63387757 | 63389086 | 1330 SAT1_CF | blue   | na |
| chrUn | 63389098 | 63389207 | 110 SAT1_CF  | blue   | na |
| chrUn | 63389228 | 63389690 | 463 SAT1_CF  | blue   | na |
| chrUn | 63391953 | 63392568 | 616 SAT1_CF  | blue   | na |
| chrUn | 63392581 | 63393187 | 607 SAT1_CF  | blue   | na |
| chrUn | 63432066 | 63433100 | 1035 SAT1_CF | blue   | na |
| chrUn | 63433121 | 63433228 | 108 SAT1_CF  | blue   | na |
| chrUn | 63433241 | 63433721 | 481 SAT1_CF  | blue   | na |
| chrUn | 63433790 | 63433962 | 173 SAT1_CF  | blue   | na |
| chrUn | 63434143 | 63434931 | 789 SAT1_CF  | blue   | na |
| chrUn | 63434973 | 63435833 | 861 SAT1_CF  | blue   | na |
| chrUn | 63435847 | 63436528 | 682 SAT1_CF  | blue   | na |
| chrUn | 63436540 | 63437223 | 684 SAT1_CF  | blue   | na |
| chrUn | 63437236 | 63437752 | 517 SAT1_CF  | blue   | na |
| chrUn | 63437769 | 63438142 | 374 SAT1_CF  | blue   | na |
| chrUn | 63438188 | 63439599 | 1412 SAT1_CF | blue   | na |
| chrUn | 63439668 | 63440511 | 844 SAT1_CF  | blue   | na |
| chrUn | 63440523 | 63441205 | 683 SAT1_CF  | blue   | na |
| chrUn | 63441218 | 63441737 | 520 SAT1_CF  | blue   | na |
| chrUn | 63441763 | 63441918 | 156 SAT1_CF  | blue   | na |
| chrUn | 63441933 | 63444052 | 2120 SAT1_CF | blue   | na |
| chrUn | 63444064 | 63444766 | 703 SAT1_CF  | blue   | na |
| chrUn | 63444779 | 63445614 | 836 SAT1_CF  | blue   | na |
| chrUn | 63445627 | 63447474 | 1848 SAT1_CF | blue   | na |
| chrUn | 63447496 | 63448233 | 738 SAT1_CF  | blue   | na |
| chrUn | 63449914 | 63450706 | 793 CarSat1  | red    | na |
| chrUn | 63450701 | 63451319 | 619 SAT1_CF  | blue   | na |
| chrUn | 63451332 | 63452037 | 706 SAT1_CF  | blue   | na |
| chrUn | 63452096 | 63452643 | 548 SAT1_CF  | blue   | na |
| chrUn | 63452657 | 63453358 | 702 SAT1_CF  | blue   | na |
| chrUn | 63453390 | 63454158 | 769 SAT1_CF  | blue   | na |
| chrUn | 63466474 | 63467434 | 961 CarSat1  | red    | na |
| chrUn | 63467459 | 63468171 | 713 CarSat1  | red    | na |
| chrUn | 63468196 | 63468901 | 706 CarSat1  | red    | na |
| chrUn | 63468931 | 63469653 | 723 CarSat1  | red    | na |
| chrUn | 63469678 | 63472076 | 2399 CarSat1 | red    | na |
| chrUn | 63472091 | 63472217 | 127 Carsat2  | orange | na |
| chrUn | 63472106 | 63472802 | 697 CarSat1  | red    | na |

|       |          |          |      |         |      |    |
|-------|----------|----------|------|---------|------|----|
| chrUn | 63472839 | 63474592 | 1754 | CarSat1 | red  | na |
| chrUn | 63474656 | 63475438 | 783  | CarSat1 | red  | na |
| chrUn | 63475459 | 63477230 | 1772 | CarSat1 | red  | na |
| chrUn | 63520156 | 63520838 | 683  | SAT1_CF | blue | na |
| chrUn | 63520850 | 63522164 | 1315 | SAT1_CF | blue | na |
| chrUn | 63522215 | 63522417 | 203  | SAT1_CF | blue | na |
| chrUn | 63524950 | 63525542 | 593  | SAT1_CF | blue | na |
| chrUn | 63525575 | 63525842 | 268  | SAT1_CF | blue | na |
| chrUn | 63525922 | 63526485 | 564  | SAT1_CF | blue | na |
| chrUn | 63526513 | 63527144 | 632  | SAT1_CF | blue | na |
| chrUn | 63527186 | 63528048 | 863  | SAT1_CF | blue | na |
| chrUn | 63528060 | 63528615 | 556  | SAT1_CF | blue | na |
| chrUn | 63528636 | 63528734 | 99   | SAT1_CF | blue | na |
| chrUn | 63528756 | 63529333 | 578  | SAT1_CF | blue | na |
| chrUn | 63529393 | 63529535 | 143  | SAT1_CF | blue | na |
| chrUn | 63529550 | 63530822 | 1273 | SAT1_CF | blue | na |
| chrUn | 63530884 | 63531463 | 580  | SAT1_CF | blue | na |
| chrUn | 63531499 | 63531684 | 186  | SAT1_CF | blue | na |
| chrUn | 63531866 | 63532030 | 165  | SAT1_CF | blue | na |
| chrUn | 63532110 | 63532719 | 610  | SAT1_CF | blue | na |
| chrUn | 63532739 | 63533898 | 1160 | SAT1_CF | blue | na |
| chrUn | 63533910 | 63535102 | 1193 | SAT1_CF | blue | na |
| chrUn | 63535115 | 63535826 | 712  | SAT1_CF | blue | na |
| chrUn | 63536135 | 63537140 | 1006 | SAT1_CF | blue | na |
| chrUn | 63539859 | 63540043 | 185  | SAT1_CF | blue | na |
| chrUn | 63540056 | 63540740 | 685  | SAT1_CF | blue | na |
| chrUn | 63540752 | 63541529 | 778  | SAT1_CF | blue | na |
| chrUn | 63542533 | 63545621 | 3089 | CarSat1 | red  | na |
| chrUn | 63545664 | 63547693 | 2030 | CarSat1 | red  | na |
| chrUn | 63548217 | 63550066 | 1850 | CarSat1 | red  | na |
| chrUn | 63550093 | 63550803 | 711  | CarSat1 | red  | na |
| chrUn | 63550830 | 63552277 | 1448 | CarSat1 | red  | na |
| chrUn | 63552304 | 63552866 | 563  | CarSat1 | red  | na |
| chrUn | 63553893 | 63556205 | 2313 | CarSat1 | red  | na |
| chrUn | 63556239 | 63557435 | 1197 | CarSat1 | red  | na |
| chrUn | 63557462 | 63560163 | 2702 | CarSat1 | red  | na |
| chrUn | 63561172 | 63561273 | 102  | SAT1_CF | blue | na |
| chrUn | 63561290 | 63564156 | 2867 | SAT1_CF | blue | na |
| chrUn | 63564191 | 63565111 | 921  | SAT1_CF | blue | na |
| chrUn | 63565164 | 63565666 | 503  | SAT1_CF | blue | na |
| chrUn | 63565683 | 63567032 | 1350 | SAT1_CF | blue | na |
| chrUn | 63567044 | 63568149 | 1106 | SAT1_CF | blue | na |

|       |          |          |      |         |        |    |
|-------|----------|----------|------|---------|--------|----|
| chrUn | 63568142 | 63568866 | 725  | CarSat1 | red    | na |
| chrUn | 63568887 | 63570870 | 1984 | CarSat1 | red    | na |
| chrUn | 63570861 | 63572650 | 1790 | SAT1_CF | blue   | na |
| chrUn | 63572731 | 63573993 | 1263 | SAT1_CF | blue   | na |
| chrUn | 63574005 | 63574799 | 795  | SAT1_CF | blue   | na |
| chrUn | 63574819 | 63575342 | 524  | SAT1_CF | blue   | na |
| chrUn | 63575354 | 63575972 | 619  | SAT1_CF | blue   | na |
| chrUn | 63575967 | 63576691 | 725  | CarSat1 | red    | na |
| chrUn | 63576723 | 63577133 | 411  | CarSat1 | red    | na |
| chrUn | 63578275 | 63580156 | 1882 | CarSat1 | red    | na |
| chrUn | 63580186 | 63584062 | 3877 | CarSat1 | red    | na |
| chrUn | 63584096 | 63584598 | 503  | CarSat1 | red    | na |
| chrUn | 63584613 | 63585321 | 709  | CarSat1 | red    | na |
| chrUn | 63585351 | 63586063 | 713  | CarSat1 | red    | na |
| chrUn | 63586093 | 63587537 | 1445 | CarSat1 | red    | na |
| chrUn | 63587567 | 63588275 | 709  | CarSat1 | red    | na |
| chrUn | 63588305 | 63590711 | 2407 | CarSat1 | red    | na |
| chrUn | 63590744 | 63591458 | 715  | CarSat1 | red    | na |
| chrUn | 63591482 | 63591969 | 488  | CarSat1 | red    | na |
| chrUn | 63591999 | 63592707 | 709  | CarSat1 | red    | na |
| chrUn | 63592737 | 63593445 | 709  | CarSat1 | red    | na |
| chrUn | 63593475 | 63594353 | 879  | CarSat1 | red    | na |
| chrUn | 63649687 | 63650570 | 884  | Sat2CF  | purple | na |
| chrUn | 63649823 | 63650559 | 737  | Sat2CF  | purple | na |
| chrUn | 63654422 | 63654966 | 545  | CarSat1 | red    | na |
| chrUn | 63654996 | 63657701 | 2706 | CarSat1 | red    | na |
| chrUn | 63657726 | 63658439 | 714  | CarSat1 | red    | na |
| chrUn | 63658455 | 63659391 | 937  | CarSat1 | red    | na |
| chrUn | 63659421 | 63660399 | 979  | CarSat1 | red    | na |
| chrUn | 63660426 | 63661387 | 962  | CarSat1 | red    | na |
| chrUn | 63661403 | 63662335 | 933  | CarSat1 | red    | na |
| chrUn | 63662365 | 63663597 | 1233 | CarSat1 | red    | na |
| chrUn | 63663622 | 63664082 | 461  | CarSat1 | red    | na |
| chrUn | 63664109 | 63665070 | 962  | CarSat1 | red    | na |
| chrUn | 63665086 | 63666545 | 1460 | CarSat1 | red    | na |
| chrUn | 63666561 | 63667029 | 469  | CarSat1 | red    | na |
| chrUn | 63667056 | 63668017 | 962  | CarSat1 | red    | na |
| chrUn | 63668033 | 63669707 | 1675 | CarSat1 | red    | na |
| chrUn | 63669737 | 63670444 | 708  | CarSat1 | red    | na |
| chrUn | 63689413 | 63690482 | 1070 | CarSat1 | red    | na |
| chrUn | 63690512 | 63691446 | 935  | CarSat1 | red    | na |
| chrUn | 63691470 | 63699338 | 7869 | CarSat1 | red    | na |



|       |          |          |       |         |        |    |
|-------|----------|----------|-------|---------|--------|----|
| chrUn | 63699353 | 63699493 | 141   | CarSat1 | red    | na |
| chrUn | 63699678 | 63702471 | 2794  | CarSat1 | red    | na |
| chrUn | 63702501 | 63705421 | 2921  | CarSat1 | red    | na |
| chrUn | 63726509 | 63736932 | 10424 | Carsat2 | orange | na |
| chrUn | 63737450 | 63742896 | 5447  | Carsat2 | orange | na |
| chrUn | 63760894 | 63763557 | 2664  | CarSat1 | red    | na |
| chrUn | 63763581 | 63764295 | 715   | CarSat1 | red    | na |
| chrUn | 63764319 | 63765037 | 719   | CarSat1 | red    | na |
| chrUn | 63765061 | 63766499 | 1439  | CarSat1 | red    | na |
| chrUn | 63766532 | 63767984 | 1453  | CarSat1 | red    | na |
| chrUn | 63768008 | 63768948 | 941   | CarSat1 | red    | na |
| chrUn | 63768984 | 63770929 | 1946  | CarSat1 | red    | na |
| chrUn | 63770953 | 63773875 | 2923  | CarSat1 | red    | na |
| chrUn | 63773899 | 63774617 | 719   | CarSat1 | red    | na |
| chrUn | 63774641 | 63776085 | 1445  | CarSat1 | red    | na |
| chrUn | 63776118 | 63776870 | 753   | CarSat1 | red    | na |
| chrUn | 63792366 | 63792793 | 428   | SAT1_CF | blue   | na |
| chrUn | 63792840 | 63793834 | 995   | SAT1_CF | blue   | na |
| chrUn | 63816253 | 63817133 | 881   | CarSat1 | red    | na |
| chrUn | 63817231 | 63818084 | 854   | CarSat1 | red    | na |
| chrUn | 63818273 | 63819051 | 779   | CarSat1 | red    | na |
| chrUn | 63819234 | 63819318 | 85    | CarSat1 | red    | na |
| chrUn | 63819335 | 63819642 | 308   | CarSat1 | red    | na |
| chrUn | 63819793 | 63820441 | 649   | CarSat1 | red    | na |
| chrUn | 63820459 | 63820932 | 474   | CarSat1 | red    | na |
| chrUn | 63820949 | 63822389 | 1441  | CarSat1 | red    | na |
| chrUn | 63822389 | 63824058 | 1670  | SAT1_CF | blue   | na |
| chrUn | 63824078 | 63829338 | 5261  | SAT1_CF | blue   | na |
| chrUn | 63829333 | 63830055 | 723   | CarSat1 | red    | na |
| chrUn | 63830208 | 63830449 | 242   | CarSat1 | red    | na |
| chrUn | 63859012 | 63859892 | 881   | CarSat1 | red    | na |
| chrUn | 63859913 | 63860512 | 600   | CarSat1 | red    | na |
| chrUn | 63860710 | 63861345 | 636   | CarSat1 | red    | na |
| chrUn | 63861370 | 63862071 | 702   | CarSat1 | red    | na |
| chrUn | 63864675 | 63865955 | 1281  | CarSat1 | red    | na |
| chrUn | 63866291 | 63869201 | 2911  | CarSat1 | red    | na |
| chrUn | 63869228 | 63869696 | 469   | CarSat1 | red    | na |
| chrUn | 63869712 | 63870673 | 962   | CarSat1 | red    | na |
| chrUn | 63870700 | 63873022 | 2323  | CarSat1 | red    | na |
| chrUn | 63875711 | 63876232 | 522   | CarSat1 | red    | na |
| chrUn | 63876257 | 63877826 | 1570  | CarSat1 | red    | na |
| chrUn | 63878955 | 63880134 | 1180  | CarSat1 | red    | na |

|       |          |          |              |      |    |
|-------|----------|----------|--------------|------|----|
| chrUn | 63882799 | 63884215 | 1417 CarSat1 | red  | na |
| chrUn | 63885218 | 63885957 | 740 SAT1_CF  | blue | na |
| chrUn | 63886001 | 63887588 | 1588 SAT1_CF | blue | na |
| chrUn | 63887668 | 63889037 | 1370 SAT1_CF | blue | na |
| chrUn | 63889050 | 63889799 | 750 SAT1_CF  | blue | na |
| chrUn | 63889811 | 63890413 | 603 SAT1_CF  | blue | na |
| chrUn | 63890424 | 63891506 | 1083 SAT1_CF | blue | na |
| chrUn | 63891551 | 63891708 | 158 SAT1_CF  | blue | na |
| chrUn | 63891723 | 63892762 | 1040 SAT1_CF | blue | na |
| chrUn | 63892775 | 63893399 | 625 SAT1_CF  | blue | na |
| chrUn | 63893441 | 63894601 | 1161 SAT1_CF | blue | na |
| chrUn | 63894614 | 63895542 | 929 SAT1_CF  | blue | na |
| chrUn | 63895554 | 63896225 | 672 SAT1_CF  | blue | na |
| chrUn | 63896249 | 63897447 | 1199 SAT1_CF | blue | na |
| chrUn | 63897460 | 63899070 | 1611 SAT1_CF | blue | na |
| chrUn | 63899384 | 63900249 | 866 SAT1_CF  | blue | na |
| chrUn | 63904279 | 63904937 | 659 SAT1_CF  | blue | na |
| chrUn | 63904981 | 63905391 | 411 SAT1_CF  | blue | na |
| chrUn | 63906395 | 63907204 | 810 SAT1_CF  | blue | na |
| chrUn | 63907247 | 63907787 | 541 SAT1_CF  | blue | na |
| chrUn | 63907814 | 63907949 | 136 SAT1_CF  | blue | na |
| chrUn | 63907977 | 63908540 | 564 SAT1_CF  | blue | na |
| chrUn | 63908641 | 63908878 | 238 SAT1_CF  | blue | na |
| chrUn | 63908916 | 63909456 | 541 SAT1_CF  | blue | na |
| chrUn | 63909474 | 63909537 | 64 SAT1_CF   | blue | na |
| chrUn | 63910129 | 63910597 | 469 SAT1_CF  | blue | na |
| chrUn | 63910677 | 63911225 | 549 SAT1_CF  | blue | na |
| chrUn | 63911236 | 63911619 | 384 SAT1_CF  | blue | na |
| chrUn | 63914214 | 63914743 | 530 SAT1_CF  | blue | na |
| chrUn | 63914755 | 63915428 | 674 SAT1_CF  | blue | na |
| chrUn | 63915471 | 63915997 | 527 SAT1_CF  | blue | na |
| chrUn | 63916018 | 63916307 | 290 SAT1_CF  | blue | na |
| chrUn | 63916597 | 63917230 | 634 SAT1_CF  | blue | na |
| chrUn | 63917289 | 63917394 | 106 SAT1_CF  | blue | na |
| chrUn | 63917441 | 63917960 | 520 SAT1_CF  | blue | na |
| chrUn | 63917987 | 63918247 | 261 SAT1_CF  | blue | na |
| chrUn | 63918317 | 63920217 | 1901 SAT1_CF | blue | na |
| chrUn | 63920261 | 63921594 | 1334 SAT1_CF | blue | na |
| chrUn | 63921681 | 63922182 | 502 SAT1_CF  | blue | na |
| chrUn | 63922194 | 63922303 | 110 SAT1_CF  | blue | na |
| chrUn | 63922324 | 63923213 | 890 SAT1_CF  | blue | na |
| chrUn | 63924446 | 63925096 | 651 SAT1_CF  | blue | na |

|       |          |          |              |      |    |
|-------|----------|----------|--------------|------|----|
| chrUn | 63925121 | 63925459 | 339 SAT1_CF  | blue | na |
| chrUn | 63927958 | 63928423 | 466 SAT1_CF  | blue | na |
| chrUn | 63928451 | 63929116 | 666 SAT1_CF  | blue | na |
| chrUn | 63929130 | 63929370 | 241 SAT1_CF  | blue | na |
| chrUn | 63930384 | 63931553 | 1170 CarSat1 | red  | na |
| chrUn | 63931569 | 63933029 | 1461 CarSat1 | red  | na |
| chrUn | 63933054 | 63933767 | 714 CarSat1  | red  | na |
| chrUn | 63933792 | 63935721 | 1930 CarSat1 | red  | na |
| chrUn | 63935748 | 63936460 | 713 CarSat1  | red  | na |
| chrUn | 63936487 | 63937449 | 963 CarSat1  | red  | na |
| chrUn | 63937474 | 63938670 | 1197 CarSat1 | red  | na |
| chrUn | 63938697 | 63939658 | 962 CarSat1  | red  | na |
| chrUn | 63939674 | 63940395 | 722 CarSat1  | red  | na |
| chrUn | 63940411 | 63941618 | 1208 CarSat1 | red  | na |
| chrUn | 63941645 | 63942606 | 962 CarSat1  | red  | na |
| chrUn | 63942622 | 63945303 | 2682 CarSat1 | red  | na |
| chrUn | 63945330 | 63946207 | 878 CarSat1  | red  | na |
| chrUn | 63957543 | 63957884 | 342 Sat19CF  | na   | na |
| chrUn | 63970694 | 63971584 | 891 CarSat1  | red  | na |
| chrUn | 63971805 | 63973251 | 1447 CarSat1 | red  | na |
| chrUn | 63973272 | 63974054 | 783 CarSat1  | red  | na |
| chrUn | 63974119 | 63975026 | 908 CarSat1  | red  | na |
| chrUn | 63984134 | 63985726 | 1593 CarSat1 | red  | na |
| chrUn | 63985757 | 63987359 | 1603 CarSat1 | red  | na |
| chrUn | 63987380 | 63988982 | 1603 CarSat1 | red  | na |
| chrUn | 63989003 | 63990444 | 1442 CarSat1 | red  | na |
| chrUn | 63990603 | 63991560 | 958 CarSat1  | red  | na |
| chrUn | 63999663 | 63999752 | 90 SAT1_CF   | blue | na |
| chrUn | 64000206 | 64000260 | 55 SAT1_CF   | blue | na |
| chrUn | 64048556 | 64049583 | 1028 CarSat1 | red  | na |
| chrUn | 64051297 | 64053444 | 2148 CarSat1 | red  | na |
| chrUn | 64054908 | 64057002 | 2095 CarSat1 | red  | na |
| chrUn | 64058344 | 64059489 | 1146 CarSat1 | red  | na |
| chrUn | 64059519 | 64060979 | 1461 CarSat1 | red  | na |
| chrUn | 64060994 | 64063173 | 2180 CarSat1 | red  | na |
| chrUn | 64063405 | 64064833 | 1429 CarSat1 | red  | na |
| chrUn | 64065039 | 64066044 | 1006 CarSat1 | red  | na |
| chrUn | 64067081 | 64068487 | 1407 CarSat1 | red  | na |
| chrUn | 64070403 | 64071250 | 848 CarSat1  | red  | na |
| chrUn | 64071271 | 64072104 | 834 CarSat1  | red  | na |
| chrUn | 64092108 | 64092621 | 514 CarSat1  | red  | na |
| chrUn | 64092642 | 64093359 | 718 CarSat1  | red  | na |

|       |          |          |      |         |        |    |
|-------|----------|----------|------|---------|--------|----|
| chrUn | 64093380 | 64094052 | 673  | CarSat1 | red    | na |
| chrUn | 64100852 | 64101356 | 505  | CarSat1 | red    | na |
| chrUn | 64101371 | 64101497 | 127  | Carsat2 | orange | na |
| chrUn | 64101386 | 64102747 | 1362 | CarSat1 | red    | na |
| chrUn | 64102835 | 64103634 | 800  | CarSat1 | red    | na |
| chrUn | 64103660 | 64104363 | 704  | CarSat1 | red    | na |
| chrUn | 64104387 | 64106058 | 1672 | CarSat1 | red    | na |
| chrUn | 64106088 | 64106795 | 708  | CarSat1 | red    | na |
| chrUn | 64106825 | 64108044 | 1220 | CarSat1 | red    | na |
| chrUn | 64109152 | 64110333 | 1182 | CarSat1 | red    | na |
| chrUn | 64110987 | 64111833 | 847  | CarSat1 | red    | na |
| chrUn | 64119167 | 64120744 | 1578 | CarSat1 | red    | na |
| chrUn | 64120954 | 64121087 | 134  | CarSat1 | red    | na |
| chrUn | 64122536 | 64123804 | 1269 | CarSat1 | red    | na |
| chrUn | 64131301 | 64132711 | 1411 | CarSat1 | red    | na |
| chrUn | 64147758 | 64148933 | 1176 | Sat2CF  | purple | na |
| chrUn | 64157426 | 64158291 | 866  | Sat2CF  | purple | na |
| chrUn | 64158168 | 64158317 | 150  | Sat2CF  | purple | na |
| chrUn | 64174201 | 64175297 | 1097 | CarSat1 | red    | na |
| chrUn | 64175312 | 64175439 | 128  | Carsat2 | orange | na |
| chrUn | 64175327 | 64176558 | 1232 | CarSat1 | red    | na |
| chrUn | 64176583 | 64177295 | 713  | CarSat1 | red    | na |
| chrUn | 64177320 | 64178882 | 1563 | CarSat1 | red    | na |
| chrUn | 64178897 | 64179023 | 127  | Carsat2 | orange | na |
| chrUn | 64178912 | 64179619 | 708  | CarSat1 | red    | na |
| chrUn | 64179634 | 64179761 | 128  | Carsat2 | orange | na |
| chrUn | 64179649 | 64180355 | 707  | CarSat1 | red    | na |
| chrUn | 64180385 | 64181091 | 707  | CarSat1 | red    | na |
| chrUn | 64181106 | 64181232 | 127  | Carsat2 | orange | na |
| chrUn | 64181121 | 64181828 | 708  | CarSat1 | red    | na |
| chrUn | 64181843 | 64181966 | 124  | Carsat2 | orange | na |
| chrUn | 64181858 | 64184559 | 2702 | CarSat1 | red    | na |
| chrUn | 64184592 | 64185295 | 704  | CarSat1 | red    | na |
| chrUn | 64185328 | 64186048 | 721  | CarSat1 | red    | na |
| chrUn | 64186060 | 64186787 | 728  | CarSat1 | red    | na |
| chrUn | 64186820 | 64187744 | 925  | CarSat1 | red    | na |
| chrUn | 64187759 | 64187886 | 128  | Carsat2 | orange | na |
| chrUn | 64187774 | 64188996 | 1223 | CarSat1 | red    | na |
| chrUn | 64189021 | 64189850 | 830  | CarSat1 | red    | na |
| chrUn | 64200278 | 64200559 | 282  | Sat15CF | na     | na |
| chrUn | 64200278 | 64200559 | 282  | Sat15CF | na     | na |
| chrUn | 64200691 | 64201013 | 323  | Sat15CF | na     | na |

|       |          |          |      |         |        |    |
|-------|----------|----------|------|---------|--------|----|
| chrUn | 64211940 | 64212689 | 750  | CarSat1 | red    | na |
| chrUn | 64212719 | 64213653 | 935  | CarSat1 | red    | na |
| chrUn | 64213669 | 64215367 | 1699 | CarSat1 | red    | na |
| chrUn | 64215394 | 64216105 | 712  | CarSat1 | red    | na |
| chrUn | 64216130 | 64216600 | 471  | CarSat1 | red    | na |
| chrUn | 64216616 | 64217847 | 1232 | CarSat1 | red    | na |
| chrUn | 64217877 | 64219053 | 1177 | CarSat1 | red    | na |
| chrUn | 64219080 | 64220530 | 1451 | CarSat1 | red    | na |
| chrUn | 64220557 | 64222288 | 1732 | CarSat1 | red    | na |
| chrUn | 64222303 | 64223747 | 1445 | CarSat1 | red    | na |
| chrUn | 64223777 | 64224485 | 709  | CarSat1 | red    | na |
| chrUn | 64224515 | 64226667 | 2153 | CarSat1 | red    | na |
| chrUn | 64226697 | 64227575 | 879  | CarSat1 | red    | na |
| chrUn | 64228612 | 64232844 | 4233 | CarSat1 | red    | na |
| chrUn | 64232871 | 64234569 | 1699 | CarSat1 | red    | na |
| chrUn | 64234585 | 64236778 | 2194 | CarSat1 | red    | na |
| chrUn | 64236794 | 64237333 | 540  | CarSat1 | red    | na |
| chrUn | 64238540 | 64240712 | 2173 | CarSat1 | red    | na |
| chrUn | 64240734 | 64240862 | 129  | Carsat2 | orange | na |
| chrUn | 64240750 | 64242463 | 1714 | CarSat1 | red    | na |
| chrUn | 64242490 | 64243199 | 710  | CarSat1 | red    | na |
| chrUn | 64243226 | 64243935 | 710  | CarSat1 | red    | na |
| chrUn | 64243962 | 64244922 | 961  | CarSat1 | red    | na |
| chrUn | 64262784 | 64263763 | 980  | CarSat1 | red    | na |
| chrUn | 64263785 | 64264753 | 969  | CarSat1 | red    | na |
| chrUn | 64264769 | 64266226 | 1458 | CarSat1 | red    | na |
| chrUn | 64266242 | 64266711 | 470  | CarSat1 | red    | na |
| chrUn | 64266740 | 64267695 | 956  | CarSat1 | red    | na |
| chrUn | 64267720 | 64268422 | 703  | CarSat1 | red    | na |
| chrUn | 64268444 | 64269904 | 1461 | CarSat1 | red    | na |
| chrUn | 64269920 | 64271377 | 1458 | CarSat1 | red    | na |
| chrUn | 64271393 | 64272329 | 937  | CarSat1 | red    | na |
| chrUn | 64272359 | 64275063 | 2705 | CarSat1 | red    | na |
| chrUn | 64275079 | 64275798 | 720  | CarSat1 | red    | na |
| chrUn | 64275814 | 64277754 | 1941 | CarSat1 | red    | na |
| chrUn | 64277781 | 64278366 | 586  | CarSat1 | red    | na |
| chrUn | 64279397 | 64280077 | 681  | CarSat1 | red    | na |
| chrUn | 64280107 | 64281559 | 1453 | CarSat1 | red    | na |
| chrUn | 64281574 | 64281689 | 116  | Carsat2 | orange | na |
| chrUn | 64281589 | 64282556 | 968  | CarSat1 | red    | na |
| chrUn | 64282594 | 64283311 | 718  | CarSat1 | red    | na |
| chrUn | 64283322 | 64286002 | 2681 | CarSat1 | red    | na |

|       |          |          |      |         |        |    |
|-------|----------|----------|------|---------|--------|----|
| chrUn | 64286032 | 64288728 | 2697 | CarSat1 | red    | na |
| chrUn | 64288761 | 64291904 | 3144 | CarSat1 | red    | na |
| chrUn | 64291919 | 64292045 | 127  | Carsat2 | orange | na |
| chrUn | 64291934 | 64293379 | 1446 | CarSat1 | red    | na |
| chrUn | 64293394 | 64293520 | 127  | Carsat2 | orange | na |
| chrUn | 64293409 | 64294122 | 714  | CarSat1 | red    | na |
| chrUn | 64294137 | 64294260 | 124  | Carsat2 | orange | na |
| chrUn | 64294153 | 64294948 | 796  | CarSat1 | red    | na |
| chrUn | 64295980 | 64296943 | 964  | CarSat1 | red    | na |
| chrUn | 64296970 | 64297439 | 470  | CarSat1 | red    | na |
| chrUn | 64297455 | 64298679 | 1225 | CarSat1 | red    | na |
| chrUn | 64298711 | 64299885 | 1175 | CarSat1 | red    | na |
| chrUn | 64299912 | 64300623 | 712  | CarSat1 | red    | na |
| chrUn | 64300650 | 64301110 | 461  | CarSat1 | red    | na |
| chrUn | 64301135 | 64302838 | 1704 | CarSat1 | red    | na |
| chrUn | 64302865 | 64304072 | 1208 | CarSat1 | red    | na |
| chrUn | 64304088 | 64305048 | 961  | CarSat1 | red    | na |
| chrUn | 64305075 | 64309225 | 4151 | CarSat1 | red    | na |
| chrUn | 64309241 | 64311516 | 2276 | CarSat1 | red    | na |
| chrUn | 64338664 | 64340310 | 1647 | CarSat1 | red    | na |
| chrUn | 64340331 | 64341047 | 717  | CarSat1 | red    | na |
| chrUn | 64341074 | 64341772 | 699  | CarSat1 | red    | na |
| chrUn | 64341799 | 64344236 | 2438 | CarSat1 | red    | na |
| chrUn | 64344261 | 64344973 | 713  | CarSat1 | red    | na |
| chrUn | 64344989 | 64345711 | 723  | CarSat1 | red    | na |
| chrUn | 64345736 | 64347183 | 1448 | CarSat1 | red    | na |
| chrUn | 64347199 | 64347920 | 722  | CarSat1 | red    | na |
| chrUn | 64347936 | 64348642 | 707  | CarSat1 | red    | na |
| chrUn | 64348673 | 64349602 | 930  | CarSat1 | red    | na |
| chrUn | 64349623 | 64349750 | 128  | Carsat2 | orange | na |
| chrUn | 64349638 | 64351605 | 1968 | CarSat1 | red    | na |
| chrUn | 64351630 | 64352090 | 461  | CarSat1 | red    | na |
| chrUn | 64352117 | 64354211 | 2095 | CarSat1 | red    | na |
| chrUn | 64361654 | 64362761 | 1108 | Sat7CF  | lime   | na |
| chrUn | 64388724 | 64390619 | 1896 | CarSat1 | red    | na |
| chrUn | 64390640 | 64391355 | 716  | CarSat1 | red    | na |
| chrUn | 64391376 | 64392336 | 961  | CarSat1 | red    | na |
| chrUn | 64392361 | 64393072 | 712  | CarSat1 | red    | na |
| chrUn | 64393097 | 64393817 | 721  | CarSat1 | red    | na |
| chrUn | 64393842 | 64394761 | 920  | CarSat1 | red    | na |
| chrUn | 64394798 | 64395282 | 485  | CarSat1 | red    | na |
| chrUn | 64395307 | 64397252 | 1946 | CarSat1 | red    | na |

|       |          |          |              |      |    |
|-------|----------|----------|--------------|------|----|
| chrUn | 64397279 | 64404243 | 6965 CarSat1 | red  | na |
| chrUn | 64440295 | 64440648 | 354 SAT1_CF  | blue | na |
| chrUn | 64440690 | 64441373 | 684 SAT1_CF  | blue | na |
| chrUn | 64441386 | 64442321 | 936 SAT1_CF  | blue | na |
| chrUn | 64442342 | 64443725 | 1384 SAT1_CF | blue | na |
| chrUn | 64443764 | 64444067 | 304 SAT1_CF  | blue | na |
| chrUn | 64444079 | 64445519 | 1441 SAT1_CF | blue | na |
| chrUn | 64445562 | 64446421 | 860 SAT1_CF  | blue | na |
| chrUn | 64446433 | 64447037 | 605 SAT1_CF  | blue | na |
| chrUn | 64447050 | 64447551 | 502 SAT1_CF  | blue | na |
| chrUn | 64448060 | 64449134 | 1075 SAT1_CF | blue | na |
| chrUn | 64449214 | 64449356 | 143 SAT1_CF  | blue | na |
| chrUn | 64449384 | 64449893 | 510 SAT1_CF  | blue | na |
| chrUn | 64449936 | 64450506 | 571 SAT1_CF  | blue | na |
| chrUn | 64450522 | 64451058 | 537 SAT1_CF  | blue | na |
| chrUn | 64451102 | 64451776 | 675 SAT1_CF  | blue | na |
| chrUn | 64451788 | 64453073 | 1286 SAT1_CF | blue | na |
| chrUn | 64453096 | 64453640 | 545 SAT1_CF  | blue | na |
| chrUn | 64453690 | 64455168 | 1479 SAT1_CF | blue | na |
| chrUn | 64455180 | 64455941 | 762 SAT1_CF  | blue | na |
| chrUn | 64455954 | 64456178 | 225 SAT1_CF  | blue | na |
| chrUn | 64462589 | 64464181 | 1593 CarSat1 | red  | na |
| chrUn | 64464202 | 64465795 | 1594 CarSat1 | red  | na |
| chrUn | 64465816 | 64466721 | 906 CarSat1  | red  | na |
| chrUn | 64466785 | 64467568 | 784 CarSat1  | red  | na |
| chrUn | 64467589 | 64469037 | 1449 CarSat1 | red  | na |
| chrUn | 64469197 | 64470154 | 958 CarSat1  | red  | na |
| chrUn | 64473633 | 64473788 | 156 SAT1_CF  | blue | na |
| chrUn | 64473833 | 64474335 | 503 SAT1_CF  | blue | na |
| chrUn | 64474348 | 64475109 | 762 SAT1_CF  | blue | na |
| chrUn | 64475122 | 64476279 | 1158 SAT1_CF | blue | na |
| chrUn | 64476323 | 64476871 | 549 SAT1_CF  | blue | na |
| chrUn | 64476951 | 64477115 | 165 SAT1_CF  | blue | na |
| chrUn | 64477296 | 64478002 | 707 SAT1_CF  | blue | na |
| chrUn | 64478029 | 64478642 | 614 SAT1_CF  | blue | na |
| chrUn | 64478654 | 64479502 | 849 SAT1_CF  | blue | na |
| chrUn | 64479591 | 64480135 | 545 SAT1_CF  | blue | na |
| chrUn | 64480177 | 64481059 | 883 SAT1_CF  | blue | na |
| chrUn | 64481071 | 64481407 | 337 SAT1_CF  | blue | na |
| chrUn | 64481443 | 64481943 | 501 SAT1_CF  | blue | na |
| chrUn | 64481961 | 64483008 | 1048 SAT1_CF | blue | na |
| chrUn | 64483029 | 64483571 | 543 SAT1_CF  | blue | na |

|       |          |          |      |         |      |    |
|-------|----------|----------|------|---------|------|----|
| chrUn | 64483641 | 64484842 | 1202 | SAT1_CF | blue | na |
| chrUn | 64484886 | 64485226 | 341  | SAT1_CF | blue | na |
| chrUn | 64485271 | 64486124 | 854  | SAT1_CF | blue | na |
| chrUn | 64486154 | 64487112 | 959  | SAT1_CF | blue | na |
| chrUn | 64487162 | 64487704 | 543  | SAT1_CF | blue | na |
| chrUn | 64487716 | 64488454 | 739  | SAT1_CF | blue | na |
| chrUn | 64531286 | 64532553 | 1268 | SAT1_CF | blue | na |
| chrUn | 64532572 | 64533151 | 580  | SAT1_CF | blue | na |
| chrUn | 64533172 | 64533693 | 522  | SAT1_CF | blue | na |
| chrUn | 64533706 | 64534875 | 1170 | SAT1_CF | blue | na |
| chrUn | 64534887 | 64535749 | 863  | SAT1_CF | blue | na |
| chrUn | 64535929 | 64536110 | 182  | SAT1_CF | blue | na |
| chrUn | 64536150 | 64536651 | 502  | SAT1_CF | blue | na |
| chrUn | 64536664 | 64537276 | 613  | SAT1_CF | blue | na |
| chrUn | 64537294 | 64538136 | 843  | SAT1_CF | blue | na |
| chrUn | 64538149 | 64539626 | 1478 | SAT1_CF | blue | na |
| chrUn | 64539646 | 64540657 | 1012 | SAT1_CF | blue | na |
| chrUn | 64540669 | 64541349 | 681  | SAT1_CF | blue | na |
| chrUn | 64541376 | 64542017 | 642  | SAT1_CF | blue | na |
| chrUn | 64542049 | 64543047 | 999  | SAT1_CF | blue | na |
| chrUn | 64543067 | 64543873 | 807  | SAT1_CF | blue | na |
| chrUn | 64543891 | 64545587 | 1697 | SAT1_CF | blue | na |
| chrUn | 64545629 | 64546362 | 734  | SAT1_CF | blue | na |
| chrUn | 64546390 | 64546662 | 273  | SAT1_CF | blue | na |
| chrUn | 64547664 | 64548035 | 372  | SAT1_CF | blue | na |
| chrUn | 64548049 | 64548692 | 644  | SAT1_CF | blue | na |
| chrUn | 64548734 | 64550367 | 1634 | SAT1_CF | blue | na |
| chrUn | 64551092 | 64551513 | 422  | SAT1_CF | blue | na |
| chrUn | 64551525 | 64552080 | 556  | SAT1_CF | blue | na |
| chrUn | 64552101 | 64552200 | 100  | SAT1_CF | blue | na |
| chrUn | 64552222 | 64552702 | 481  | SAT1_CF | blue | na |
| chrUn | 64552723 | 64553121 | 399  | SAT1_CF | blue | na |
| chrUn | 64553134 | 64554287 | 1154 | SAT1_CF | blue | na |
| chrUn | 64554300 | 64554801 | 502  | SAT1_CF | blue | na |
| chrUn | 64554814 | 64555540 | 727  | SAT1_CF | blue | na |
| chrUn | 64555572 | 64556283 | 712  | SAT1_CF | blue | na |
| chrUn | 64556297 | 64556506 | 210  | SAT1_CF | blue | na |
| chrUn | 64556846 | 64557355 | 510  | SAT1_CF | blue | na |
| chrUn | 64557369 | 64558228 | 860  | SAT1_CF | blue | na |
| chrUn | 64559681 | 64560148 | 468  | SAT1_CF | blue | na |
| chrUn | 64560184 | 64562851 | 2668 | SAT1_CF | blue | na |
| chrUn | 64564450 | 64564805 | 356  | CarSat1 | red  | na |



|       |          |          |              |        |    |
|-------|----------|----------|--------------|--------|----|
| chrUn | 64610436 | 64610612 | 177 Sat2CF   | purple | na |
| chrUn | 64610457 | 64611532 | 1076 Sat2CF  | purple | na |
| chrUn | 64638088 | 64638807 | 720 SAT1_CF  | blue   | na |
| chrUn | 64638850 | 64639961 | 1112 SAT1_CF | blue   | na |
| chrUn | 64639992 | 64640846 | 855 SAT1_CF  | blue   | na |
| chrUn | 64640890 | 64644097 | 3208 SAT1_CF | blue   | na |
| chrUn | 64644141 | 64645281 | 1141 SAT1_CF | blue   | na |
| chrUn | 64645267 | 64645989 | 723 CarSat1  | red    | na |
| chrUn | 64646023 | 64646449 | 427 CarSat1  | red    | na |
| chrUn | 64662068 | 64663279 | 1212 Sat2CF  | purple | na |
| chrUn | 64691229 | 64693124 | 1896 CarSat1 | red    | na |
| chrUn | 64693149 | 64693633 | 485 CarSat1  | red    | na |
| chrUn | 64693663 | 64695107 | 1445 CarSat1 | red    | na |
| chrUn | 64695144 | 64696072 | 929 CarSat1  | red    | na |
| chrUn | 64696097 | 64696799 | 703 CarSat1  | red    | na |
| chrUn | 64696824 | 64698527 | 1704 CarSat1 | red    | na |
| chrUn | 64698548 | 64699263 | 716 CarSat1  | red    | na |
| chrUn | 64699284 | 64700481 | 1198 CarSat1 | red    | na |
| chrUn | 64700506 | 64701474 | 969 CarSat1  | red    | na |
| chrUn | 64701495 | 64702208 | 714 CarSat1  | red    | na |
| chrUn | 64702229 | 64702946 | 718 CarSat1  | red    | na |
| chrUn | 64702967 | 64703944 | 978 CarSat1  | red    | na |
| chrUn | 64703972 | 64704908 | 937 CarSat1  | red    | na |
| chrUn | 64704933 | 64705886 | 954 CarSat1  | red    | na |
| chrUn | 64705913 | 64706501 | 589 CarSat1  | red    | na |
| chrUn | 64707502 | 64708997 | 1496 SAT1_CF | blue   | na |
| chrUn | 64709026 | 64709539 | 514 SAT1_CF  | blue   | na |
| chrUn | 64709556 | 64709929 | 374 SAT1_CF  | blue   | na |
| chrUn | 64709972 | 64711138 | 1167 SAT1_CF | blue   | na |
| chrUn | 64711163 | 64711751 | 589 SAT1_CF  | blue   | na |
| chrUn | 64711802 | 64712498 | 697 SAT1_CF  | blue   | na |
| chrUn | 64712526 | 64713149 | 624 SAT1_CF  | blue   | na |
| chrUn | 64713248 | 64713812 | 565 SAT1_CF  | blue   | na |
| chrUn | 64713840 | 64714471 | 632 SAT1_CF  | blue   | na |
| chrUn | 64714514 | 64715190 | 677 SAT1_CF  | blue   | na |
| chrUn | 64715202 | 64715416 | 215 SAT1_CF  | blue   | na |
| chrUn | 64715607 | 64716856 | 1250 SAT1_CF | blue   | na |
| chrUn | 64716874 | 64717985 | 1112 SAT1_CF | blue   | na |
| chrUn | 64718027 | 64718893 | 867 SAT1_CF  | blue   | na |
| chrUn | 64718905 | 64719460 | 556 SAT1_CF  | blue   | na |
| chrUn | 64719473 | 64720398 | 926 SAT1_CF  | blue   | na |
| chrUn | 64720580 | 64720745 | 166 SAT1_CF  | blue   | na |

|       |          |          |              |      |    |
|-------|----------|----------|--------------|------|----|
| chrUn | 64720825 | 64722768 | 1944 SAT1_CF | blue | na |
| chrUn | 64723798 | 64724346 | 549 SAT1_CF  | blue | na |
| chrUn | 64724358 | 64724650 | 293 SAT1_CF  | blue | na |
| chrUn | 64724687 | 64725188 | 502 SAT1_CF  | blue | na |
| chrUn | 64725201 | 64726572 | 1372 SAT1_CF | blue | na |
| chrUn | 64726633 | 64727505 | 873 SAT1_CF  | blue | na |
| chrUn | 64727532 | 64728252 | 721 SAT1_CF  | blue | na |
| chrUn | 64730676 | 64730999 | 324 SAT1_CF  | blue | na |
| chrUn | 64731069 | 64731616 | 548 SAT1_CF  | blue | na |
| chrUn | 64731663 | 64731774 | 112 SAT1_CF  | blue | na |
| chrUn | 64731859 | 64732532 | 674 SAT1_CF  | blue | na |
| chrUn | 64732574 | 64734176 | 1603 SAT1_CF | blue | na |
| chrUn | 64734196 | 64735639 | 1444 SAT1_CF | blue | na |
| chrUn | 64735683 | 64736221 | 539 SAT1_CF  | blue | na |
| chrUn | 64736237 | 64737309 | 1073 SAT1_CF | blue | na |
| chrUn | 64737337 | 64737719 | 383 SAT1_CF  | blue | na |
| chrUn | 64737740 | 64738230 | 491 SAT1_CF  | blue | na |
| chrUn | 64738242 | 64738351 | 110 SAT1_CF  | blue | na |
| chrUn | 64738372 | 64739004 | 633 SAT1_CF  | blue | na |
| chrUn | 64739016 | 64739783 | 768 SAT1_CF  | blue | na |
| chrUn | 64739795 | 64740184 | 390 SAT1_CF  | blue | na |
| chrUn | 64757412 | 64758844 | 1433 SAT1_CF | blue | na |
| chrUn | 64760869 | 64761423 | 555 SAT1_CF  | blue | na |
| chrUn | 64761463 | 64762036 | 574 SAT1_CF  | blue | na |
| chrUn | 64763912 | 64765179 | 1268 SAT1_CF | blue | na |
| chrUn | 64765221 | 64765968 | 748 SAT1_CF  | blue | na |
| chrUn | 64765982 | 64766678 | 697 SAT1_CF  | blue | na |
| chrUn | 64766720 | 64767617 | 898 SAT1_CF  | blue | na |
| chrUn | 64767631 | 64768964 | 1334 SAT1_CF | blue | na |
| chrUn | 64768978 | 64769478 | 501 SAT1_CF  | blue | na |
| chrUn | 64769534 | 64769883 | 350 SAT1_CF  | blue | na |
| chrUn | 64769917 | 64770421 | 505 SAT1_CF  | blue | na |
| chrUn | 64770432 | 64770920 | 489 SAT1_CF  | blue | na |
| chrUn | 64770948 | 64771862 | 915 SAT1_CF  | blue | na |
| chrUn | 64774001 | 64774392 | 392 SAT1_CF  | blue | na |
| chrUn | 64774451 | 64774632 | 182 SAT1_CF  | blue | na |
| chrUn | 64774814 | 64775790 | 977 SAT1_CF  | blue | na |
| chrUn | 64777324 | 64777554 | 231 SAT1_CF  | blue | na |
| chrUn | 64777567 | 64778121 | 555 SAT1_CF  | blue | na |
| chrUn | 64778152 | 64778880 | 729 SAT1_CF  | blue | na |
| chrUn | 64778997 | 64779378 | 382 SAT1_CF  | blue | na |
| chrUn | 64780394 | 64784971 | 4578 CarSat1 | red  | na |

|       |          |          |      |         |        |    |
|-------|----------|----------|------|---------|--------|----|
| chrUn | 64785011 | 64787320 | 2310 | CarSat1 | red    | na |
| chrUn | 64788808 | 64789435 | 628  | CarSat1 | red    | na |
| chrUn | 64789460 | 64789953 | 494  | CarSat1 | red    | na |
| chrUn | 64789990 | 64792382 | 2393 | CarSat1 | red    | na |
| chrUn | 64792407 | 64793654 | 1248 | CarSat1 | red    | na |
| chrUn | 64793669 | 64794851 | 1183 | CarSat1 | red    | na |
| chrUn | 64794872 | 64795849 | 978  | CarSat1 | red    | na |
| chrUn | 64795879 | 64796929 | 1051 | CarSat1 | red    | na |
| chrUn | 64815438 | 64816127 | 690  | CarSat1 | red    | na |
| chrUn | 64816152 | 64817115 | 964  | CarSat1 | red    | na |
| chrUn | 64817142 | 64818345 | 1204 | CarSat1 | red    | na |
| chrUn | 64818370 | 64820061 | 1692 | CarSat1 | red    | na |
| chrUn | 64820088 | 64820795 | 708  | CarSat1 | red    | na |
| chrUn | 64820822 | 64821264 | 443  | CarSat1 | red    | na |
| chrUn | 64821795 | 64822878 | 1084 | CarSat1 | red    | na |
| chrUn | 64822894 | 64823855 | 962  | CarSat1 | red    | na |
| chrUn | 64823882 | 64824593 | 712  | CarSat1 | red    | na |
| chrUn | 64824620 | 64825329 | 710  | CarSat1 | red    | na |
| chrUn | 64825356 | 64826066 | 711  | CarSat1 | red    | na |
| chrUn | 64826093 | 64827290 | 1198 | CarSat1 | red    | na |
| chrUn | 64827315 | 64828277 | 963  | CarSat1 | red    | na |
| chrUn | 64828304 | 64829016 | 713  | CarSat1 | red    | na |
| chrUn | 64829043 | 64829753 | 711  | CarSat1 | red    | na |
| chrUn | 64829780 | 64830603 | 824  | CarSat1 | red    | na |
| chrUn | 64831603 | 64835707 | 4105 | CarSat1 | red    | na |
| chrUn | 64835737 | 64836449 | 713  | CarSat1 | red    | na |
| chrUn | 64836479 | 64838661 | 2183 | CarSat1 | red    | na |
| chrUn | 64838691 | 64840133 | 1443 | CarSat1 | red    | na |
| chrUn | 64840163 | 64841881 | 1719 | CarSat1 | red    | na |
| chrUn | 64841902 | 64843087 | 1186 | CarSat1 | red    | na |
| chrUn | 64843102 | 64843229 | 128  | Carsat2 | orange | na |
| chrUn | 64843117 | 64843825 | 709  | CarSat1 | red    | na |
| chrUn | 64843855 | 64844556 | 702  | CarSat1 | red    | na |
| chrUn | 64844593 | 64846738 | 2146 | CarSat1 | red    | na |
| chrUn | 64871142 | 64871932 | 791  | SAT1_CF | blue   | na |
| chrUn | 64871974 | 64873395 | 1422 | SAT1_CF | blue   | na |
| chrUn | 64873460 | 64874687 | 1228 | SAT1_CF | blue   | na |
| chrUn | 64874730 | 64876472 | 1743 | SAT1_CF | blue   | na |
| chrUn | 64876537 | 64877867 | 1331 | SAT1_CF | blue   | na |
| chrUn | 64877862 | 64878585 | 724  | CarSat1 | red    | na |
| chrUn | 64878617 | 64879039 | 423  | CarSat1 | red    | na |
| chrUn | 64887223 | 64888038 | 816  | SAT1_CF | blue   | na |

|       |          |          |              |        |    |
|-------|----------|----------|--------------|--------|----|
| chrUn | 64888081 | 64889275 | 1195 SAT1_CF | blue   | na |
| chrUn | 64889297 | 64889820 | 524 SAT1_CF  | blue   | na |
| chrUn | 64889840 | 64891000 | 1161 SAT1_CF | blue   | na |
| chrUn | 64891043 | 64891772 | 730 SAT1_CF  | blue   | na |
| chrUn | 64891815 | 64892365 | 551 SAT1_CF  | blue   | na |
| chrUn | 64892420 | 64892538 | 119 SAT1_CF  | blue   | na |
| chrUn | 64939154 | 64940320 | 1167 Sat2CF  | purple | na |
| chrUn | 64978405 | 64979570 | 1166 CarSat1 | red    | na |
| chrUn | 64979600 | 64980307 | 708 CarSat1  | red    | na |
| chrUn | 64980322 | 64980448 | 127 Carsat2  | orange | na |
| chrUn | 64980337 | 64981049 | 713 CarSat1  | red    | na |
| chrUn | 64981079 | 64981566 | 488 CarSat1  | red    | na |
| chrUn | 64981590 | 64982523 | 934 CarSat1  | red    | na |
| chrUn | 64982538 | 64982664 | 127 Carsat2  | orange | na |
| chrUn | 64982553 | 64983252 | 700 CarSat1  | red    | na |
| chrUn | 64983274 | 64983401 | 128 Carsat2  | orange | na |
| chrUn | 64983289 | 64983774 | 486 CarSat1  | red    | na |
| chrUn | 64983799 | 64984268 | 470 CarSat1  | red    | na |
| chrUn | 64984290 | 64986212 | 1923 CarSat1 | red    | na |
| chrUn | 64986227 | 64986354 | 128 Carsat2  | orange | na |
| chrUn | 64986242 | 64986949 | 708 CarSat1  | red    | na |
| chrUn | 64986979 | 64989690 | 2712 CarSat1 | red    | na |
| chrUn | 64989702 | 64990919 | 1218 CarSat1 | red    | na |
| chrUn | 64990940 | 64991897 | 958 CarSat1  | red    | na |
| chrUn | 64991922 | 64992391 | 470 CarSat1  | red    | na |
| chrUn | 64992418 | 64993425 | 1008 CarSat1 | red    | na |
| chrUn | 65030364 | 65032959 | 2596 CarSat1 | red    | na |
| chrUn | 65032984 | 65033111 | 128 Carsat2  | orange | na |
| chrUn | 65032999 | 65033711 | 713 CarSat1  | red    | na |
| chrUn | 65033726 | 65033853 | 128 Carsat2  | orange | na |
| chrUn | 65033741 | 65034441 | 701 CarSat1  | red    | na |
| chrUn | 65034463 | 65034589 | 127 Carsat2  | orange | na |
| chrUn | 65034478 | 65034963 | 486 CarSat1  | red    | na |
| chrUn | 65034996 | 65036661 | 1666 CarSat1 | red    | na |
| chrUn | 65036691 | 65037391 | 701 CarSat1  | red    | na |
| chrUn | 65037431 | 65038137 | 707 CarSat1  | red    | na |
| chrUn | 65038167 | 65038874 | 708 CarSat1  | red    | na |
| chrUn | 65038904 | 65039611 | 708 CarSat1  | red    | na |
| chrUn | 65039626 | 65039753 | 128 Carsat2  | orange | na |
| chrUn | 65039641 | 65040352 | 712 CarSat1  | red    | na |
| chrUn | 65040367 | 65040494 | 128 Carsat2  | orange | na |
| chrUn | 65040382 | 65041094 | 713 CarSat1  | red    | na |

|       |          |          |      |         |        |    |
|-------|----------|----------|------|---------|--------|----|
| chrUn | 65041124 | 65041830 | 707  | CarSat1 | red    | na |
| chrUn | 65041845 | 65041971 | 127  | Carsat2 | orange | na |
| chrUn | 65041860 | 65042570 | 711  | CarSat1 | red    | na |
| chrUn | 65042585 | 65042712 | 128  | Carsat2 | orange | na |
| chrUn | 65042600 | 65043307 | 708  | CarSat1 | red    | na |
| chrUn | 65043322 | 65043449 | 128  | Carsat2 | orange | na |
| chrUn | 65043337 | 65044049 | 713  | CarSat1 | red    | na |
| chrUn | 65044079 | 65045350 | 1272 | CarSat1 | red    | na |
| chrUn | 65046402 | 65047854 | 1453 | CarSat1 | red    | na |
| chrUn | 65047876 | 65048827 | 952  | CarSat1 | red    | na |
| chrUn | 65048858 | 65050616 | 1759 | CarSat1 | red    | na |
| chrUn | 65050851 | 65053516 | 2666 | CarSat1 | red    | na |
| chrUn | 65053553 | 65054252 | 700  | CarSat1 | red    | na |
| chrUn | 65054289 | 65054989 | 701  | CarSat1 | red    | na |
| chrUn | 65055026 | 65055741 | 716  | CarSat1 | red    | na |
| chrUn | 65055756 | 65056200 | 445  | CarSat1 | red    | na |
| chrUn | 65056221 | 65056936 | 716  | CarSat1 | red    | na |
| chrUn | 65056957 | 65058163 | 1207 | CarSat1 | red    | na |
| chrUn | 65058188 | 65060623 | 2436 | CarSat1 | red    | na |
| chrUn | 65060644 | 65061308 | 665  | CarSat1 | red    | na |
| chrUn | 65080906 | 65082135 | 1230 | Sat2CF  | purple | na |
| chrUn | 65094215 | 65096792 | 2578 | CarSat1 | red    | na |
| chrUn | 65096819 | 65097259 | 441  | CarSat1 | red    | na |
| chrUn | 65097289 | 65098268 | 980  | CarSat1 | red    | na |
| chrUn | 65098295 | 65099742 | 1448 | CarSat1 | red    | na |
| chrUn | 65099769 | 65101574 | 1806 | CarSat1 | red    | na |
| chrUn | 65104218 | 65111668 | 7451 | CarSat1 | red    | na |
| chrUn | 65112689 | 65114643 | 1955 | CarSat1 | red    | na |
| chrUn | 65114659 | 65115152 | 494  | CarSat1 | red    | na |
| chrUn | 65115182 | 65115888 | 707  | CarSat1 | red    | na |
| chrUn | 65115918 | 65116629 | 712  | CarSat1 | red    | na |
| chrUn | 65116659 | 65117380 | 722  | CarSat1 | red    | na |
| chrUn | 65117395 | 65118121 | 727  | CarSat1 | red    | na |
| chrUn | 65118136 | 65119580 | 1445 | CarSat1 | red    | na |
| chrUn | 65119610 | 65120336 | 727  | CarSat1 | red    | na |
| chrUn | 65120351 | 65123276 | 2926 | CarSat1 | red    | na |
| chrUn | 65123306 | 65125507 | 2202 | CarSat1 | red    | na |
| chrUn | 65125522 | 65126248 | 727  | CarSat1 | red    | na |
| chrUn | 65126263 | 65126985 | 723  | CarSat1 | red    | na |
| chrUn | 65127000 | 65127571 | 572  | CarSat1 | red    | na |
| chrUn | 65128572 | 65129642 | 1071 | CarSat1 | red    | na |
| chrUn | 65129657 | 65130363 | 707  | CarSat1 | red    | na |

|       |          |          |              |      |    |
|-------|----------|----------|--------------|------|----|
| chrUn | 65130393 | 65131103 | 711 CarSat1  | red  | na |
| chrUn | 65131133 | 65131840 | 708 CarSat1  | red  | na |
| chrUn | 65131870 | 65132592 | 723 CarSat1  | red  | na |
| chrUn | 65132607 | 65133316 | 710 CarSat1  | red  | na |
| chrUn | 65133346 | 65134807 | 1462 CarSat1 | red  | na |
| chrUn | 65134823 | 65135545 | 723 CarSat1  | red  | na |
| chrUn | 65135560 | 65137738 | 2179 CarSat1 | red  | na |
| chrUn | 65137772 | 65138494 | 723 CarSat1  | red  | na |
| chrUn | 65138509 | 65139234 | 726 CarSat1  | red  | na |
| chrUn | 65139250 | 65140433 | 1184 CarSat1 | red  | na |
| chrUn | 65140454 | 65142644 | 2191 CarSat1 | red  | na |
| chrUn | 65142665 | 65143453 | 789 CarSat1  | red  | na |
| chrUn | 65213695 | 65214575 | 881 CarSat1  | red  | na |
| chrUn | 65214596 | 65215305 | 710 CarSat1  | red  | na |
| chrUn | 65215332 | 65216039 | 708 CarSat1  | red  | na |
| chrUn | 65216066 | 65216526 | 461 CarSat1  | red  | na |
| chrUn | 65216551 | 65218006 | 1456 CarSat1 | red  | na |
| chrUn | 65218032 | 65219721 | 1690 CarSat1 | red  | na |
| chrUn | 65219748 | 65222198 | 2451 CarSat1 | red  | na |
| chrUn | 65222228 | 65223426 | 1199 CarSat1 | red  | na |
| chrUn | 65223437 | 65224410 | 974 CarSat1  | red  | na |
| chrUn | 65224440 | 65224880 | 441 CarSat1  | red  | na |
| chrUn | 65224907 | 65225618 | 712 CarSat1  | red  | na |
| chrUn | 65225645 | 65227358 | 1714 CarSat1 | red  | na |
| chrUn | 65227395 | 65228460 | 1066 CarSat1 | red  | na |
| chrUn | 65229462 | 65229990 | 529 SAT1_CF  | blue | na |
| chrUn | 65230034 | 65230592 | 559 SAT1_CF  | blue | na |
| chrUn | 65230634 | 65231671 | 1038 SAT1_CF | blue | na |
| chrUn | 65232598 | 65233979 | 1382 SAT1_CF | blue | na |
| chrUn | 65233994 | 65234363 | 370 SAT1_CF  | blue | na |
| chrUn | 65234398 | 65234900 | 503 SAT1_CF  | blue | na |
| chrUn | 65234913 | 65235595 | 683 SAT1_CF  | blue | na |
| chrUn | 65235633 | 65235966 | 334 SAT1_CF  | blue | na |
| chrUn | 65235979 | 65236059 | 81 SAT1_CF   | blue | na |
| chrUn | 65236077 | 65236863 | 787 SAT1_CF  | blue | na |
| chrUn | 65237068 | 65237929 | 862 SAT1_CF  | blue | na |
| chrUn | 65237942 | 65238545 | 604 SAT1_CF  | blue | na |
| chrUn | 65238557 | 65239240 | 684 SAT1_CF  | blue | na |
| chrUn | 65239326 | 65240068 | 743 SAT1_CF  | blue | na |
| chrUn | 65240079 | 65240475 | 397 SAT1_CF  | blue | na |
| chrUn | 65240501 | 65242161 | 1661 SAT1_CF | blue | na |
| chrUn | 65242218 | 65242764 | 547 SAT1_CF  | blue | na |

|       |          |          |              |        |    |
|-------|----------|----------|--------------|--------|----|
| chrUn | 65242775 | 65242961 | 187 SAT1_CF  | blue   | na |
| chrUn | 65243211 | 65243729 | 519 SAT1_CF  | blue   | na |
| chrUn | 65243770 | 65245202 | 1433 SAT1_CF | blue   | na |
| chrUn | 65246202 | 65247030 | 829 CarSat1  | red    | na |
| chrUn | 65247060 | 65247500 | 441 CarSat1  | red    | na |
| chrUn | 65247527 | 65249237 | 1711 CarSat1 | red    | na |
| chrUn | 65249267 | 65249978 | 712 CarSat1  | red    | na |
| chrUn | 65250008 | 65251923 | 1916 CarSat1 | red    | na |
| chrUn | 65251950 | 65253158 | 1209 CarSat1 | red    | na |
| chrUn | 65253182 | 65254876 | 1695 CarSat1 | red    | na |
| chrUn | 65254901 | 65255884 | 984 CarSat1  | red    | na |
| chrUn | 65255913 | 65256848 | 936 CarSat1  | red    | na |
| chrUn | 65256872 | 65257358 | 487 CarSat1  | red    | na |
| chrUn | 65257389 | 65258110 | 722 CarSat1  | red    | na |
| chrUn | 65258125 | 65258583 | 459 CarSat1  | red    | na |
| chrUn | 65258594 | 65259325 | 732 CarSat1  | red    | na |
| chrUn | 65259336 | 65260919 | 1584 CarSat1 | red    | na |
| chrUn | 65261923 | 65265214 | 3292 CarSat1 | red    | na |
| chrUn | 65265244 | 65265738 | 495 CarSat1  | red    | na |
| chrUn | 65265754 | 65266689 | 936 CarSat1  | red    | na |
| chrUn | 65266704 | 65266830 | 127 Carsat2  | orange | na |
| chrUn | 65266719 | 65269820 | 3102 CarSat1 | red    | na |
| chrUn | 65269929 | 65270717 | 789 CarSat1  | red    | na |
| chrUn | 65270729 | 65273398 | 2670 CarSat1 | red    | na |
| chrUn | 65273428 | 65276727 | 3300 CarSat1 | red    | na |
| chrUn | 65277745 | 65278283 | 539 SAT1_CF  | blue   | na |
| chrUn | 65278326 | 65279225 | 900 SAT1_CF  | blue   | na |
| chrUn | 65279707 | 65280746 | 1040 SAT1_CF | blue   | na |
| chrUn | 65280833 | 65281188 | 356 SAT1_CF  | blue   | na |
| chrUn | 65281199 | 65281717 | 519 SAT1_CF  | blue   | na |
| chrUn | 65281738 | 65282678 | 941 SAT1_CF  | blue   | na |
| chrUn | 65282696 | 65282901 | 206 SAT1_CF  | blue   | na |
| chrUn | 65282921 | 65283422 | 502 SAT1_CF  | blue   | na |
| chrUn | 65283509 | 65283823 | 315 SAT1_CF  | blue   | na |
| chrUn | 65283861 | 65284493 | 633 SAT1_CF  | blue   | na |
| chrUn | 65284518 | 65284622 | 105 SAT1_CF  | blue   | na |
| chrUn | 65284635 | 65285108 | 474 SAT1_CF  | blue   | na |
| chrUn | 65285173 | 65285330 | 158 SAT1_CF  | blue   | na |
| chrUn | 65285554 | 65287559 | 2006 SAT1_CF | blue   | na |
| chrUn | 65288002 | 65289157 | 1156 SAT1_CF | blue   | na |
| chrUn | 65289183 | 65289340 | 158 SAT1_CF  | blue   | na |
| chrUn | 65289656 | 65290158 | 503 SAT1_CF  | blue   | na |

|       |          |          |              |        |    |
|-------|----------|----------|--------------|--------|----|
| chrUn | 65290169 | 65290851 | 683 SAT1_CF  | blue   | na |
| chrUn | 65293255 | 65294275 | 1021 SAT1_CF | blue   | na |
| chrUn | 65295486 | 65296032 | 547 SAT1_CF  | blue   | na |
| chrUn | 65296050 | 65296570 | 521 SAT1_CF  | blue   | na |
| chrUn | 65296591 | 65296960 | 370 SAT1_CF  | blue   | na |
| chrUn | 65298170 | 65298957 | 788 CarSat1  | red    | na |
| chrUn | 65298990 | 65300927 | 1938 CarSat1 | red    | na |
| chrUn | 65300949 | 65302129 | 1181 CarSat1 | red    | na |
| chrUn | 65302144 | 65302270 | 127 Carsat2  | orange | na |
| chrUn | 65302159 | 65303017 | 859 CarSat1  | red    | na |
| chrUn | 65303402 | 65308049 | 4648 CarSat1 | red    | na |
| chrUn | 65309024 | 65312462 | 3439 CarSat1 | red    | na |
| chrUn | 65312487 | 65313200 | 714 CarSat1  | red    | na |
| chrUn | 65313225 | 65314134 | 910 CarSat1  | red    | na |
| chrUn | 65351547 | 65352659 | 1113 CarSat1 | red    | na |
| chrUn | 65352674 | 65352800 | 127 Carsat2  | orange | na |
| chrUn | 65352689 | 65353170 | 482 CarSat1  | red    | na |
| chrUn | 65353203 | 65353907 | 705 CarSat1  | red    | na |
| chrUn | 65353940 | 65355384 | 1445 CarSat1 | red    | na |
| chrUn | 65355417 | 65356121 | 705 CarSat1  | red    | na |
| chrUn | 65356133 | 65357817 | 1685 CarSat1 | red    | na |
| chrUn | 65357832 | 65357958 | 127 Carsat2  | orange | na |
| chrUn | 65357847 | 65358333 | 487 CarSat1  | red    | na |
| chrUn | 65358366 | 65359291 | 926 CarSat1  | red    | na |
| chrUn | 65359321 | 65360026 | 706 CarSat1  | red    | na |
| chrUn | 65360041 | 65360167 | 127 Carsat2  | orange | na |
| chrUn | 65360056 | 65360762 | 707 CarSat1  | red    | na |
| chrUn | 65360777 | 65360903 | 127 Carsat2  | orange | na |
| chrUn | 65360792 | 65361499 | 708 CarSat1  | red    | na |
| chrUn | 65361514 | 65361640 | 127 Carsat2  | orange | na |
| chrUn | 65361529 | 65362235 | 707 CarSat1  | red    | na |
| chrUn | 65362250 | 65362376 | 127 Carsat2  | orange | na |
| chrUn | 65362265 | 65362972 | 708 CarSat1  | red    | na |
| chrUn | 65363002 | 65364226 | 1225 CarSat1 | red    | na |
| chrUn | 65364259 | 65365186 | 928 CarSat1  | red    | na |
| chrUn | 65365201 | 65365327 | 127 Carsat2  | orange | na |
| chrUn | 65365216 | 65366149 | 934 CarSat1  | red    | na |
| chrUn | 65392667 | 65393366 | 700 CarSat1  | red    | na |
| chrUn | 65393568 | 65393692 | 125 CarSat1  | red    | na |
| chrUn | 65393717 | 65394177 | 461 CarSat1  | red    | na |
| chrUn | 65394194 | 65397895 | 3702 CarSat1 | red    | na |
| chrUn | 65397924 | 65399571 | 1648 CarSat1 | red    | na |



|       |          |          |      |         |     |    |
|-------|----------|----------|------|---------|-----|----|
| chrUn | 65399598 | 65400650 | 1053 | CarSat1 | red | na |
| chrUn | 65401694 | 65402347 | 654  | CarSat1 | red | na |
| chrUn | 65402374 | 65403624 | 1251 | CarSat1 | red | na |
| chrUn | 65404663 | 65406318 | 1656 | CarSat1 | red | na |
| chrUn | 65406579 | 65407785 | 1207 | CarSat1 | red | na |
| chrUn | 65407958 | 65408544 | 587  | CarSat1 | red | na |
| chrUn | 65408571 | 65409214 | 644  | CarSat1 | red | na |
| chrUn | 65409242 | 65410402 | 1161 | CarSat1 | red | na |
| chrUn | 65411121 | 65412443 | 1323 | CarSat1 | red | na |
| chrUn | 65412459 | 65413180 | 722  | CarSat1 | red | na |
| chrUn | 65413196 | 65415212 | 2017 | CarSat1 | red | na |
| chrUn | 65415231 | 65415832 | 602  | CarSat1 | red | na |
| chrUn | 65415848 | 65416811 | 964  | CarSat1 | red | na |
| chrUn | 65416838 | 65418422 | 1585 | CarSat1 | red | na |
| chrUn | 65419470 | 65421290 | 1821 | CarSat1 | red | na |
| chrUn | 65421306 | 65422766 | 1461 | CarSat1 | red | na |
| chrUn | 65422790 | 65424753 | 1964 | CarSat1 | red | na |
| chrUn | 65424783 | 65428817 | 4035 | CarSat1 | red | na |
| chrUn | 65428828 | 65434048 | 5221 | CarSat1 | red | na |
| chrUn | 65453428 | 65454622 | 1195 | CarSat1 | red | na |
| chrUn | 65454805 | 65454959 | 155  | CarSat1 | red | na |
| chrUn | 65454985 | 65455477 | 493  | CarSat1 | red | na |
| chrUn | 65455494 | 65456215 | 722  | CarSat1 | red | na |
| chrUn | 65456232 | 65457023 | 792  | CarSat1 | red | na |
| chrUn | 65457204 | 65457450 | 247  | CarSat1 | red | na |
| chrUn | 65457645 | 65458302 | 658  | CarSat1 | red | na |
| chrUn | 65458332 | 65458894 | 563  | CarSat1 | red | na |
| chrUn | 65459083 | 65459255 | 173  | CarSat1 | red | na |
| chrUn | 65459267 | 65459829 | 563  | CarSat1 | red | na |
| chrUn | 65460018 | 65460264 | 247  | CarSat1 | red | na |
| chrUn | 65460459 | 65461855 | 1397 | CarSat1 | red | na |
| chrUn | 65461885 | 65462864 | 980  | CarSat1 | red | na |
| chrUn | 65462891 | 65464588 | 1698 | CarSat1 | red | na |
| chrUn | 65464604 | 65465682 | 1079 | CarSat1 | red | na |
| chrUn | 65466684 | 65467569 | 886  | CarSat1 | red | na |
| chrUn | 65467593 | 65468296 | 704  | CarSat1 | red | na |
| chrUn | 65468329 | 65469040 | 712  | CarSat1 | red | na |
| chrUn | 65469064 | 65469549 | 486  | CarSat1 | red | na |
| chrUn | 65469579 | 65470503 | 925  | CarSat1 | red | na |
| chrUn | 65470536 | 65472721 | 2186 | CarSat1 | red | na |
| chrUn | 65472745 | 65481283 | 8539 | CarSat1 | red | na |
| chrUn | 65482289 | 65483080 | 792  | CarSat1 | red | na |

|       |          |          |      |         |        |    |
|-------|----------|----------|------|---------|--------|----|
| chrUn | 65483104 | 65483822 | 719  | CarSat1 | red    | na |
| chrUn | 65483846 | 65485296 | 1451 | CarSat1 | red    | na |
| chrUn | 65485320 | 65487708 | 2389 | CarSat1 | red    | na |
| chrUn | 65488227 | 65489443 | 1217 | CarSat1 | red    | na |
| chrUn | 65490791 | 65491925 | 1135 | CarSat1 | red    | na |
| chrUn | 65491949 | 65493620 | 1672 | CarSat1 | red    | na |
| chrUn | 65493650 | 65494136 | 487  | CarSat1 | red    | na |
| chrUn | 65494160 | 65494874 | 715  | CarSat1 | red    | na |
| chrUn | 65494898 | 65498129 | 3232 | CarSat1 | red    | na |
| chrUn | 65498317 | 65498689 | 373  | CarSat1 | red    | na |
| chrUn | 65499765 | 65500134 | 370  | SAT1_CF | blue   | na |
| chrUn | 65500147 | 65500690 | 544  | SAT1_CF | blue   | na |
| chrUn | 65500734 | 65503429 | 2696 | SAT1_CF | blue   | na |
| chrUn | 65503441 | 65504122 | 682  | SAT1_CF | blue   | na |
| chrUn | 65504135 | 65504637 | 503  | SAT1_CF | blue   | na |
| chrUn | 65504672 | 65505078 | 407  | SAT1_CF | blue   | na |
| chrUn | 65505091 | 65505611 | 521  | SAT1_CF | blue   | na |
| chrUn | 65505678 | 65507222 | 1545 | SAT1_CF | blue   | na |
| chrUn | 65507236 | 65507775 | 540  | SAT1_CF | blue   | na |
| chrUn | 65507818 | 65508494 | 677  | SAT1_CF | blue   | na |
| chrUn | 65508506 | 65509121 | 616  | SAT1_CF | blue   | na |
| chrUn | 65509138 | 65510536 | 1399 | SAT1_CF | blue   | na |
| chrUn | 65510550 | 65511070 | 521  | SAT1_CF | blue   | na |
| chrUn | 65511107 | 65511423 | 317  | SAT1_CF | blue   | na |
| chrUn | 65511465 | 65513048 | 1584 | SAT1_CF | blue   | na |
| chrUn | 65513069 | 65514249 | 1181 | SAT1_CF | blue   | na |
| chrUn | 65538967 | 65541600 | 2634 | CarSat1 | red    | na |
| chrUn | 65541630 | 65544327 | 2698 | CarSat1 | red    | na |
| chrUn | 65544352 | 65545064 | 713  | CarSat1 | red    | na |
| chrUn | 65545089 | 65545800 | 712  | CarSat1 | red    | na |
| chrUn | 65545825 | 65552169 | 6345 | CarSat1 | red    | na |
| chrUn | 65552196 | 65552902 | 707  | CarSat1 | red    | na |
| chrUn | 65552932 | 65553463 | 532  | CarSat1 | red    | na |
| chrUn | 65574538 | 65575117 | 580  | CarSat1 | red    | na |
| chrUn | 65582353 | 65583066 | 714  | CarSat1 | red    | na |
| chrUn | 65583263 | 65583623 | 361  | CarSat1 | red    | na |
| chrUn | 65583638 | 65583765 | 128  | Carsat2 | orange | na |
| chrUn | 65583657 | 65584882 | 1226 | CarSat1 | red    | na |
| chrUn | 65584908 | 65586651 | 1744 | CarSat1 | red    | na |
| chrUn | 65587399 | 65588646 | 1248 | CarSat1 | red    | na |
| chrUn | 65588667 | 65589202 | 536  | CarSat1 | red    | na |
| chrUn | 65590207 | 65590318 | 112  | SAT1_CF | blue   | na |

|       |          |          |              |      |    |
|-------|----------|----------|--------------|------|----|
| chrUn | 65590341 | 65590878 | 538 SAT1_CF  | blue | na |
| chrUn | 65590893 | 65591763 | 871 SAT1_CF  | blue | na |
| chrUn | 65593626 | 65594163 | 538 SAT1_CF  | blue | na |
| chrUn | 65594206 | 65595867 | 1662 SAT1_CF | blue | na |
| chrUn | 65595919 | 65596083 | 165 SAT1_CF  | blue | na |
| chrUn | 65596117 | 65596834 | 718 SAT1_CF  | blue | na |
| chrUn | 65599102 | 65599525 | 424 SAT1_CF  | blue | na |
| chrUn | 65599551 | 65600053 | 503 SAT1_CF  | blue | na |
| chrUn | 65600071 | 65600255 | 185 SAT1_CF  | blue | na |
| chrUn | 65600282 | 65600794 | 513 SAT1_CF  | blue | na |
| chrUn | 65600812 | 65600916 | 105 SAT1_CF  | blue | na |
| chrUn | 65601208 | 65601695 | 488 SAT1_CF  | blue | na |
| chrUn | 65601770 | 65602157 | 388 SAT1_CF  | blue | na |
| chrUn | 65603635 | 65604099 | 465 SAT1_CF  | blue | na |
| chrUn | 65604112 | 65604612 | 501 SAT1_CF  | blue | na |
| chrUn | 65604652 | 65606033 | 1382 SAT1_CF | blue | na |
| chrUn | 65606077 | 65607411 | 1335 SAT1_CF | blue | na |
| chrUn | 65607425 | 65608106 | 682 SAT1_CF  | blue | na |
| chrUn | 65608118 | 65608671 | 554 SAT1_CF  | blue | na |
| chrUn | 65608742 | 65609076 | 335 SAT1_CF  | blue | na |
| chrUn | 65610849 | 65611629 | 781 SAT1_CF  | blue | na |
| chrUn | 65611672 | 65612223 | 552 SAT1_CF  | blue | na |
| chrUn | 65613236 | 65615860 | 2625 CarSat1 | red  | na |
| chrUn | 65615876 | 65616345 | 470 CarSat1  | red  | na |
| chrUn | 65616372 | 65617339 | 968 CarSat1  | red  | na |
| chrUn | 65617364 | 65619542 | 2179 CarSat1 | red  | na |
| chrUn | 65619558 | 65620763 | 1206 CarSat1 | red  | na |
| chrUn | 65620784 | 65622306 | 1523 CarSat1 | red  | na |
| chrUn | 65623207 | 65624923 | 1717 CarSat1 | red  | na |
| chrUn | 65624950 | 65625645 | 696 CarSat1  | red  | na |
| chrUn | 65625688 | 65627388 | 1701 CarSat1 | red  | na |
| chrUn | 65627404 | 65627872 | 469 CarSat1  | red  | na |
| chrUn | 65627899 | 65628526 | 628 CarSat1  | red  | na |
| chrUn | 65629540 | 65630598 | 1059 CarSat1 | red  | na |
| chrUn | 65630613 | 65632074 | 1462 CarSat1 | red  | na |
| chrUn | 65632089 | 65633554 | 1466 CarSat1 | red  | na |
| chrUn | 65633569 | 65634276 | 708 CarSat1  | red  | na |
| chrUn | 65634306 | 65635032 | 727 CarSat1  | red  | na |
| chrUn | 65635047 | 65635486 | 440 CarSat1  | red  | na |
| chrUn | 65635513 | 65636506 | 994 CarSat1  | red  | na |
| chrUn | 65636521 | 65637247 | 727 CarSat1  | red  | na |
| chrUn | 65637262 | 65637988 | 727 CarSat1  | red  | na |

|       |          |          |      |         |        |    |
|-------|----------|----------|------|---------|--------|----|
| chrUn | 65638003 | 65638707 | 705  | CarSat1 | red    | na |
| chrUn | 65638737 | 65639448 | 712  | CarSat1 | red    | na |
| chrUn | 65639474 | 65640196 | 723  | CarSat1 | red    | na |
| chrUn | 65640211 | 65641673 | 1463 | CarSat1 | red    | na |
| chrUn | 65641688 | 65643878 | 2191 | CarSat1 | red    | na |
| chrUn | 65660360 | 65663857 | 3498 | CarSat1 | red    | na |
| chrUn | 65668552 | 65670662 | 2111 | CarSat1 | red    | na |
| chrUn | 65670683 | 65671396 | 714  | CarSat1 | red    | na |
| chrUn | 65671418 | 65676017 | 4600 | CarSat1 | red    | na |
| chrUn | 65676049 | 65676933 | 885  | CarSat1 | red    | na |
| chrUn | 65677132 | 65677851 | 720  | CarSat1 | red    | na |
| chrUn | 65704835 | 65706338 | 1504 | CarSat1 | red    | na |
| chrUn | 65706354 | 65707290 | 937  | CarSat1 | red    | na |
| chrUn | 65707320 | 65709287 | 1968 | CarSat1 | red    | na |
| chrUn | 65709303 | 65709757 | 455  | CarSat1 | red    | na |
| chrUn | 65709799 | 65712962 | 3164 | CarSat1 | red    | na |
| chrUn | 65712987 | 65713708 | 722  | CarSat1 | red    | na |
| chrUn | 65713724 | 65714930 | 1207 | CarSat1 | red    | na |
| chrUn | 65714957 | 65717142 | 2186 | CarSat1 | red    | na |
| chrUn | 65717169 | 65717879 | 711  | CarSat1 | red    | na |
| chrUn | 65717906 | 65719231 | 1326 | CarSat1 | red    | na |
| chrUn | 65720276 | 65720984 | 709  | CarSat1 | red    | na |
| chrUn | 65721014 | 65721991 | 978  | CarSat1 | red    | na |
| chrUn | 65722012 | 65725929 | 3918 | CarSat1 | red    | na |
| chrUn | 65725945 | 65726861 | 917  | CarSat1 | red    | na |
| chrUn | 65726904 | 65728349 | 1446 | CarSat1 | red    | na |
| chrUn | 65728379 | 65729358 | 980  | CarSat1 | red    | na |
| chrUn | 65729385 | 65730095 | 711  | CarSat1 | red    | na |
| chrUn | 65730122 | 65730833 | 712  | CarSat1 | red    | na |
| chrUn | 65730860 | 65731300 | 441  | CarSat1 | red    | na |
| chrUn | 65731330 | 65732308 | 979  | CarSat1 | red    | na |
| chrUn | 65732335 | 65734037 | 1703 | CarSat1 | red    | na |
| chrUn | 65734053 | 65734613 | 561  | CarSat1 | red    | na |
| chrUn | 65752050 | 65753227 | 1178 | Sat2CF  | purple | na |
| chrUn | 65768185 | 65769581 | 1397 | CarSat1 | red    | na |
| chrUn | 65769606 | 65771051 | 1446 | CarSat1 | red    | na |
| chrUn | 65771076 | 65773755 | 2680 | CarSat1 | red    | na |
| chrUn | 65773776 | 65775004 | 1229 | CarSat1 | red    | na |
| chrUn | 65775496 | 65776429 | 934  | CarSat1 | red    | na |
| chrUn | 65776459 | 65780110 | 3652 | CarSat1 | red    | na |
| chrUn | 65780140 | 65780848 | 709  | CarSat1 | red    | na |
| chrUn | 65780878 | 65781857 | 980  | CarSat1 | red    | na |

|       |          |          |      |         |        |    |
|-------|----------|----------|------|---------|--------|----|
| chrUn | 65781884 | 65782978 | 1095 | CarSat1 | red    | na |
| chrUn | 65784002 | 65785094 | 1093 | CarSat1 | red    | na |
| chrUn | 65785124 | 65785970 | 847  | CarSat1 | red    | na |
| chrUn | 65787109 | 65789548 | 2440 | CarSat1 | red    | na |
| chrUn | 65790084 | 65792277 | 2194 | CarSat1 | red    | na |
| chrUn | 65792292 | 65792418 | 127  | Carsat2 | orange | na |
| chrUn | 65792307 | 65793014 | 708  | CarSat1 | red    | na |
| chrUn | 65793044 | 65793645 | 602  | CarSat1 | red    | na |
| chrUn | 65794341 | 65795838 | 1498 | CarSat1 | red    | na |
| chrUn | 65797335 | 65797823 | 489  | CarSat1 | red    | na |
| chrUn | 65797838 | 65797951 | 114  | Carsat2 | orange | na |
| chrUn | 65797853 | 65799283 | 1431 | CarSat1 | red    | na |
| chrUn | 65800490 | 65801952 | 1463 | CarSat1 | red    | na |
| chrUn | 65801985 | 65803274 | 1290 | CarSat1 | red    | na |
| chrUn | 65820932 | 65821604 | 673  | Sat2CF  | purple | na |
| chrUn | 65821003 | 65821853 | 851  | Sat2CF  | purple | na |
| chrUn | 65821717 | 65821879 | 163  | Sat2CF  | purple | na |
| chrUn | 65853507 | 65854734 | 1228 | Sat2CF  | purple | na |
| chrUn | 65870311 | 65870631 | 321  | Sat15CF | na     | na |
| chrUn | 65870687 | 65871001 | 315  | Sat15CF | na     | na |
| chrUn | 65888427 | 65890306 | 1880 | CarSat1 | red    | na |
| chrUn | 65890537 | 65891256 | 720  | CarSat1 | red    | na |
| chrUn | 65891282 | 65896537 | 5256 | CarSat1 | red    | na |
| chrUn | 65896864 | 65899357 | 2494 | CarSat1 | red    | na |
| chrUn | 65899382 | 65900603 | 1222 | CarSat1 | red    | na |
| chrUn | 65901073 | 65902380 | 1308 | CarSat1 | red    | na |
| chrUn | 65903124 | 65904282 | 1159 | CarSat1 | red    | na |
| chrUn | 65905316 | 65908178 | 2863 | SAT1_CF | blue   | na |
| chrUn | 65908190 | 65908867 | 678  | SAT1_CF | blue   | na |
| chrUn | 65908879 | 65909272 | 394  | SAT1_CF | blue   | na |
| chrUn | 65909274 | 65911114 | 1841 | CarSat1 | red    | na |
| chrUn | 65911267 | 65911991 | 725  | CarSat1 | red    | na |
| chrUn | 65912034 | 65912864 | 831  | SAT1_CF | blue   | na |
| chrUn | 65912927 | 65914625 | 1699 | SAT1_CF | blue   | na |
| chrUn | 65914667 | 65916217 | 1551 | SAT1_CF | blue   | na |
| chrUn | 65916229 | 65916615 | 387  | SAT1_CF | blue   | na |
| chrUn | 65916618 | 65918325 | 1708 | CarSat1 | red    | na |
| chrUn | 65918517 | 65919322 | 806  | CarSat1 | red    | na |
| chrUn | 65919342 | 65919562 | 221  | CarSat1 | red    | na |
| chrUn | 65960680 | 65961362 | 683  | CarSat1 | red    | na |
| chrUn | 65961383 | 65961829 | 447  | CarSat1 | red    | na |
| chrUn | 65961859 | 65962838 | 980  | CarSat1 | red    | na |

|       |          |          |      |         |      |    |
|-------|----------|----------|------|---------|------|----|
| chrUn | 65962859 | 65963305 | 447  | CarSat1 | red  | na |
| chrUn | 65963335 | 65964288 | 954  | CarSat1 | red  | na |
| chrUn | 65964335 | 65966527 | 2193 | CarSat1 | red  | na |
| chrUn | 65966554 | 65967508 | 955  | CarSat1 | red  | na |
| chrUn | 65967533 | 65970191 | 2659 | CarSat1 | red  | na |
| chrUn | 65970238 | 65971934 | 1697 | CarSat1 | red  | na |
| chrUn | 65971968 | 65974944 | 2977 | CarSat1 | red  | na |
| chrUn | 66009323 | 66009372 | 50   | HSATII  | na   | na |
| chrUn | 66009408 | 66010360 | 953  | CarSat1 | red  | na |
| chrUn | 66010381 | 66011163 | 783  | CarSat1 | red  | na |
| chrUn | 66011227 | 66012812 | 1586 | CarSat1 | red  | na |
| chrUn | 66013718 | 66014627 | 910  | CarSat1 | red  | na |
| chrUn | 66014648 | 66017159 | 2512 | CarSat1 | red  | na |
| chrUn | 66017196 | 66019830 | 2635 | CarSat1 | red  | na |
| chrUn | 66019857 | 66021701 | 1845 | CarSat1 | red  | na |
| chrUn | 66023564 | 66025222 | 1659 | CarSat1 | red  | na |
| chrUn | 66025247 | 66026688 | 1442 | CarSat1 | red  | na |
| chrUn | 66026715 | 66027426 | 712  | CarSat1 | red  | na |
| chrUn | 66027452 | 66028405 | 954  | CarSat1 | red  | na |
| chrUn | 66028438 | 66029636 | 1199 | CarSat1 | red  | na |
| chrUn | 66029661 | 66031200 | 1540 | CarSat1 | red  | na |
| chrUn | 66034423 | 66037220 | 2798 | CarSat1 | red  | na |
| chrUn | 66037245 | 66037946 | 702  | CarSat1 | red  | na |
| chrUn | 66037971 | 66040083 | 2113 | CarSat1 | red  | na |
| chrUn | 66045018 | 66046615 | 1598 | CarSat1 | red  | na |
| chrUn | 66046636 | 66049137 | 2502 | CarSat1 | red  | na |
| chrUn | 66049216 | 66049984 | 769  | CarSat1 | red  | na |
| chrUn | 66050004 | 66051459 | 1456 | CarSat1 | red  | na |
| chrUn | 66051619 | 66052576 | 958  | CarSat1 | red  | na |
| chrUn | 66056331 | 66056750 | 420  | CarSat1 | red  | na |
| chrUn | 66056782 | 66057499 | 718  | CarSat1 | red  | na |
| chrUn | 66057487 | 66061923 | 4437 | SAT1_CF | blue | na |
| chrUn | 66061967 | 66062836 | 870  | SAT1_CF | blue | na |
| chrUn | 66062879 | 66063426 | 548  | SAT1_CF | blue | na |
| chrUn | 66063448 | 66063953 | 506  | SAT1_CF | blue | na |
| chrUn | 66063956 | 66065149 | 1194 | CarSat1 | red  | na |
| chrUn | 66065164 | 66065890 | 727  | CarSat1 | red  | na |
| chrUn | 66065904 | 66066683 | 780  | CarSat1 | red  | na |
| chrUn | 66066704 | 66067543 | 840  | CarSat1 | red  | na |
| chrUn | 66067570 | 66069121 | 1552 | CarSat1 | red  | na |
| chrUn | 66086847 | 66088877 | 2031 | SAT1_CF | blue | na |
| chrUn | 66088903 | 66089243 | 341  | SAT1_CF | blue | na |

|       |          |          |              |      |    |
|-------|----------|----------|--------------|------|----|
| chrUn | 66089285 | 66090505 | 1221 SAT1_CF | blue | na |
| chrUn | 66090518 | 66091018 | 501 SAT1_CF  | blue | na |
| chrUn | 66091056 | 66092648 | 1593 SAT1_CF | blue | na |
| chrUn | 66094935 | 66096379 | 1445 SAT1_CF | blue | na |
| chrUn | 66097989 | 66098625 | 637 SAT1_CF  | blue | na |
| chrUn | 66098695 | 66099237 | 543 SAT1_CF  | blue | na |
| chrUn | 66099258 | 66100312 | 1055 SAT1_CF | blue | na |
| chrUn | 66100323 | 66100969 | 647 SAT1_CF  | blue | na |
| chrUn | 66102155 | 66103315 | 1161 SAT1_CF | blue | na |
| chrUn | 66103343 | 66103844 | 502 SAT1_CF  | blue | na |
| chrUn | 66103890 | 66104778 | 889 SAT1_CF  | blue | na |
| chrUn | 66159580 | 66160416 | 837 CarSat1  | red  | na |
| chrUn | 66160431 | 66161378 | 948 CarSat1  | red  | na |
| chrUn | 66161390 | 66162097 | 708 CarSat1  | red  | na |
| chrUn | 66162130 | 66162630 | 501 CarSat1  | red  | na |
| chrUn | 66162645 | 66163367 | 723 CarSat1  | red  | na |
| chrUn | 66163382 | 66164108 | 727 CarSat1  | red  | na |
| chrUn | 66164130 | 66165587 | 1458 CarSat1 | red  | na |
| chrUn | 66165602 | 66166327 | 726 CarSat1  | red  | na |
| chrUn | 66166342 | 66168519 | 2178 CarSat1 | red  | na |
| chrUn | 66168549 | 66169479 | 931 CarSat1  | red  | na |
| chrUn | 66169512 | 66170011 | 500 CarSat1  | red  | na |
| chrUn | 66170036 | 66171473 | 1438 CarSat1 | red  | na |
| chrUn | 66171503 | 66173018 | 1516 CarSat1 | red  | na |
| chrUn | 66173033 | 66173695 | 663 CarSat1  | red  | na |
| chrUn | 66199992 | 66200769 | 778 Sat29CF  | na   | na |
| chrUn | 66200550 | 66200799 | 250 Sat29CF  | na   | na |
| chrUn | 66217023 | 66217980 | 958 CarSat1  | red  | na |
| chrUn | 66218140 | 66219293 | 1154 CarSat1 | red  | na |
| chrUn | 66220512 | 66221164 | 653 CarSat1  | red  | na |
| chrUn | 66254811 | 66255456 | 646 SAT1_CF  | blue | na |
| chrUn | 66255499 | 66257538 | 2040 SAT1_CF | blue | na |
| chrUn | 66257559 | 66258686 | 1128 SAT1_CF | blue | na |
| chrUn | 66258706 | 66261005 | 2300 SAT1_CF | blue | na |
| chrUn | 66261019 | 66262192 | 1174 SAT1_CF | blue | na |
| chrUn | 66262205 | 66264384 | 2180 SAT1_CF | blue | na |
| chrUn | 66264441 | 66264943 | 503 SAT1_CF  | blue | na |
| chrUn | 66264956 | 66265028 | 73 SAT1_CF   | blue | na |
| chrUn | 66265085 | 66266247 | 1163 SAT1_CF | blue | na |
| chrUn | 66266329 | 66268111 | 1783 SAT1_CF | blue | na |
| chrUn | 66325077 | 66325531 | 455 SAT1_CF  | blue | na |
| chrUn | 66325571 | 66328369 | 2799 SAT1_CF | blue | na |

|       |          |          |               |        |    |
|-------|----------|----------|---------------|--------|----|
| chrUn | 66328381 | 66328851 | 471 SAT1_CF   | blue   | na |
| chrUn | 66328853 | 66330822 | 1970 CarSat1  | red    | na |
| chrUn | 66330844 | 66331547 | 704 CarSat1   | red    | na |
| chrUn | 66339496 | 66339921 | 426 CarSat1   | red    | na |
| chrUn | 66340118 | 66340631 | 514 CarSat1   | red    | na |
| chrUn | 66350333 | 66351290 | 958 CarSat1   | red    | na |
| chrUn | 66351450 | 66352158 | 709 CarSat1   | red    | na |
| chrUn | 66354544 | 66356399 | 1856 CarSat1  | red    | na |
| chrUn | 66357447 | 66358070 | 624 CarSat1   | red    | na |
| chrUn | 66358097 | 66358564 | 468 CarSat1   | red    | na |
| chrUn | 66358580 | 66359434 | 855 CarSat1   | red    | na |
| chrUn | 66365593 | 66366820 | 1228 Sat153CF | na     | na |
| chrUn | 66379214 | 66380262 | 1049 CarSat1  | red    | na |
| chrUn | 66380278 | 66381735 | 1458 CarSat1  | red    | na |
| chrUn | 66381761 | 66382218 | 458 CarSat1   | red    | na |
| chrUn | 66382245 | 66383207 | 963 CarSat1   | red    | na |
| chrUn | 66383223 | 66385010 | 1788 CarSat1  | red    | na |
| chrUn | 66385306 | 66387381 | 2076 CarSat1  | red    | na |
| chrUn | 66387402 | 66388118 | 717 CarSat1   | red    | na |
| chrUn | 66388139 | 66388855 | 717 CarSat1   | red    | na |
| chrUn | 66388876 | 66389322 | 447 CarSat1   | red    | na |
| chrUn | 66389337 | 66389464 | 128 Carsat2   | orange | na |
| chrUn | 66389352 | 66390795 | 1444 CarSat1  | red    | na |
| chrUn | 66390812 | 66390939 | 128 Carsat2   | orange | na |
| chrUn | 66390827 | 66391805 | 979 CarSat1   | red    | na |
| chrUn | 66391826 | 66392785 | 960 CarSat1   | red    | na |
| chrUn | 66392810 | 66393490 | 681 CarSat1   | red    | na |
| chrUn | 66428251 | 66429847 | 1597 SAT1_CF  | blue   | na |
| chrUn | 66429917 | 66430768 | 852 SAT1_CF   | blue   | na |
| chrUn | 66430810 | 66431413 | 604 SAT1_CF   | blue   | na |
| chrUn | 66431425 | 66432187 | 763 SAT1_CF   | blue   | na |
| chrUn | 66432200 | 66432679 | 480 SAT1_CF   | blue   | na |
| chrUn | 66432740 | 66434857 | 2118 SAT1_CF  | blue   | na |
| chrUn | 66434945 | 66435492 | 548 SAT1_CF   | blue   | na |
| chrUn | 66435504 | 66436178 | 675 SAT1_CF   | blue   | na |
| chrUn | 66436200 | 66436742 | 543 SAT1_CF   | blue   | na |
| chrUn | 66436786 | 66437533 | 748 SAT1_CF   | blue   | na |
| chrUn | 66437610 | 66438468 | 859 SAT1_CF   | blue   | na |
| chrUn | 66438480 | 66439111 | 632 SAT1_CF   | blue   | na |
| chrUn | 66439140 | 66439754 | 615 SAT1_CF   | blue   | na |
| chrUn | 66439841 | 66440193 | 353 SAT1_CF   | blue   | na |
| chrUn | 66440207 | 66442273 | 2067 SAT1_CF  | blue   | na |



|       |          |          |      |         |        |    |
|-------|----------|----------|------|---------|--------|----|
| chrUn | 66443305 | 66443492 | 188  | Carsat2 | orange | na |
| chrUn | 66443324 | 66444785 | 1462 | CarSat1 | red    | na |
| chrUn | 66444816 | 66446268 | 1453 | CarSat1 | red    | na |
| chrUn | 66446295 | 66446735 | 441  | CarSat1 | red    | na |
| chrUn | 66446765 | 66448735 | 1971 | CarSat1 | red    | na |
| chrUn | 66448751 | 66449469 | 719  | CarSat1 | red    | na |
| chrUn | 66449485 | 66453155 | 3671 | CarSat1 | red    | na |
| chrUn | 66453171 | 66454379 | 1209 | CarSat1 | red    | na |
| chrUn | 66454404 | 66456103 | 1700 | CarSat1 | red    | na |
| chrUn | 66456119 | 66456588 | 470  | CarSat1 | red    | na |
| chrUn | 66456615 | 66457231 | 617  | CarSat1 | red    | na |
| chrUn | 66459405 | 66459572 | 168  | Sat2CF  | purple | na |
| chrUn | 66459455 | 66460252 | 798  | Sat2CF  | purple | na |
| chrUn | 66479082 | 66479123 | 42   | HSATII  | na     | na |
| chrUn | 66488102 | 66490408 | 2307 | CarSat1 | red    | na |
| chrUn | 66490438 | 66494825 | 4388 | CarSat1 | red    | na |
| chrUn | 66494836 | 66496026 | 1191 | CarSat1 | red    | na |
| chrUn | 66496059 | 66502001 | 5943 | CarSat1 | red    | na |
| chrUn | 66555789 | 66555976 | 188  | Carsat2 | orange | na |
| chrUn | 66555808 | 66557004 | 1197 | CarSat1 | red    | na |
| chrUn | 66557034 | 66558477 | 1444 | CarSat1 | red    | na |
| chrUn | 66558507 | 66564889 | 6383 | CarSat1 | red    | na |
| chrUn | 66564913 | 66568801 | 3889 | CarSat1 | red    | na |
| chrUn | 66568831 | 66569668 | 838  | CarSat1 | red    | na |
| chrUn | 66630729 | 66631775 | 1047 | CarSat1 | red    | na |
| chrUn | 66633859 | 66634982 | 1124 | CarSat1 | red    | na |
| chrUn | 66637635 | 66638664 | 1030 | CarSat1 | red    | na |
| chrUn | 66638945 | 66640345 | 1401 | CarSat1 | red    | na |
| chrUn | 66640868 | 66641573 | 706  | CarSat1 | red    | na |
| chrUn | 66641603 | 66642914 | 1312 | CarSat1 | red    | na |
| chrUn | 66643230 | 66643831 | 602  | CarSat1 | red    | na |
| chrUn | 66643852 | 66646285 | 2434 | CarSat1 | red    | na |
| chrUn | 66646310 | 66647374 | 1065 | CarSat1 | red    | na |
| chrUn | 66647686 | 66648765 | 1080 | CarSat1 | red    | na |
| chrUn | 66648802 | 66650491 | 1690 | CarSat1 | red    | na |
| chrUn | 66653031 | 66654192 | 1162 | Sat2CF  | purple | na |
| chrUn | 66695695 | 66696592 | 898  | CarSat1 | red    | na |
| chrUn | 66696608 | 66697571 | 964  | CarSat1 | red    | na |
| chrUn | 66697598 | 66698067 | 470  | CarSat1 | red    | na |
| chrUn | 66698083 | 66698804 | 722  | CarSat1 | red    | na |
| chrUn | 66698820 | 66699783 | 964  | CarSat1 | red    | na |
| chrUn | 66699810 | 66701015 | 1206 | CarSat1 | red    | na |

|       |          |          |      |         |      |    |
|-------|----------|----------|------|---------|------|----|
| chrUn | 66701031 | 66701994 | 964  | CarSat1 | red  | na |
| chrUn | 66702021 | 66704203 | 2183 | CarSat1 | red  | na |
| chrUn | 66704230 | 66706168 | 1939 | CarSat1 | red  | na |
| chrUn | 66706185 | 66706896 | 712  | CarSat1 | red  | na |
| chrUn | 66706921 | 66707805 | 885  | CarSat1 | red  | na |
| chrUn | 66708004 | 66708717 | 714  | CarSat1 | red  | na |
| chrUn | 66710429 | 66711076 | 648  | CarSat1 | red  | na |
| chrUn | 66711069 | 66711842 | 774  | SAT1_CF | blue | na |
| chrUn | 66713900 | 66714413 | 514  | SAT1_CF | blue | na |
| chrUn | 66714458 | 66714615 | 158  | SAT1_CF | blue | na |
| chrUn | 66714643 | 66715155 | 513  | SAT1_CF | blue | na |
| chrUn | 66715234 | 66715568 | 335  | SAT1_CF | blue | na |
| chrUn | 66716403 | 66716884 | 482  | SAT1_CF | blue | na |
| chrUn | 66716926 | 66717603 | 678  | SAT1_CF | blue | na |
| chrUn | 66717616 | 66718297 | 682  | SAT1_CF | blue | na |
| chrUn | 66718317 | 66718811 | 495  | SAT1_CF | blue | na |
| chrUn | 66718864 | 66719424 | 561  | SAT1_CF | blue | na |
| chrUn | 66722144 | 66725348 | 3205 | CarSat1 | red  | na |
| chrUn | 66726737 | 66727745 | 1009 | SAT1_CF | blue | na |
| chrUn | 66730491 | 66732206 | 1716 | CarSat1 | red  | na |
| chrUn | 66733226 | 66734900 | 1675 | CarSat1 | red  | na |
| chrUn | 66734930 | 66735492 | 563  | CarSat1 | red  | na |
| chrUn | 66735672 | 66735826 | 155  | CarSat1 | red  | na |
| chrUn | 66735856 | 66736416 | 561  | CarSat1 | red  | na |
| chrUn | 66736598 | 66736848 | 251  | CarSat1 | red  | na |
| chrUn | 66737041 | 66737699 | 659  | CarSat1 | red  | na |
| chrUn | 66737729 | 66738291 | 563  | CarSat1 | red  | na |
| chrUn | 66738472 | 66739149 | 678  | CarSat1 | red  | na |
| chrUn | 66739165 | 66739887 | 723  | CarSat1 | red  | na |
| chrUn | 66739903 | 66740623 | 721  | CarSat1 | red  | na |
| chrUn | 66740639 | 66741108 | 470  | CarSat1 | red  | na |
| chrUn | 66741135 | 66741846 | 712  | CarSat1 | red  | na |
| chrUn | 66741873 | 66742836 | 964  | CarSat1 | red  | na |
| chrUn | 66742852 | 66743574 | 723  | CarSat1 | red  | na |
| chrUn | 66743591 | 66744059 | 469  | CarSat1 | red  | na |
| chrUn | 66744086 | 66745048 | 963  | CarSat1 | red  | na |
| chrUn | 66745064 | 66746871 | 1808 | CarSat1 | red  | na |
| chrUn | 66747895 | 66748654 | 760  | CarSat1 | red  | na |
| chrUn | 66748680 | 66749885 | 1206 | CarSat1 | red  | na |
| chrUn | 66749901 | 66750860 | 960  | CarSat1 | red  | na |
| chrUn | 66750887 | 66751598 | 712  | CarSat1 | red  | na |
| chrUn | 66751625 | 66753074 | 1450 | CarSat1 | red  | na |

|       |          |          |      |         |        |    |
|-------|----------|----------|------|---------|--------|----|
| chrUn | 66753101 | 66753570 | 470  | CarSat1 | red    | na |
| chrUn | 66753586 | 66754544 | 959  | CarSat1 | red    | na |
| chrUn | 66754571 | 66758499 | 3929 | CarSat1 | red    | na |
| chrUn | 66758529 | 66759712 | 1184 | CarSat1 | red    | na |
| chrUn | 66759730 | 66760199 | 470  | CarSat1 | red    | na |
| chrUn | 66760215 | 66761570 | 1356 | CarSat1 | red    | na |
| chrUn | 66777256 | 66777946 | 691  | CarSat1 | red    | na |
| chrUn | 66777973 | 66778413 | 441  | CarSat1 | red    | na |
| chrUn | 66778428 | 66778555 | 128  | Carsat2 | orange | na |
| chrUn | 66778443 | 66779422 | 980  | CarSat1 | red    | na |
| chrUn | 66779449 | 66780159 | 711  | CarSat1 | red    | na |
| chrUn | 66780179 | 66781632 | 1454 | CarSat1 | red    | na |
| chrUn | 66781659 | 66782370 | 712  | CarSat1 | red    | na |
| chrUn | 66782397 | 66782511 | 115  | CarSat1 | red    | na |
| chrUn | 66782705 | 66783564 | 860  | CarSat1 | red    | na |
| chrUn | 66783589 | 66785178 | 1590 | CarSat1 | red    | na |
| chrUn | 66786705 | 66787474 | 770  | CarSat1 | red    | na |
| chrUn | 66787490 | 66789431 | 1942 | CarSat1 | red    | na |
| chrUn | 66789457 | 66790168 | 712  | CarSat1 | red    | na |
| chrUn | 66790195 | 66791303 | 1109 | CarSat1 | red    | na |
| chrUn | 66791347 | 66792414 | 1068 | CarSat1 | red    | na |
| chrUn | 66793448 | 66794972 | 1525 | CarSat1 | red    | na |
| chrUn | 66794988 | 66795709 | 722  | CarSat1 | red    | na |
| chrUn | 66795725 | 66796446 | 722  | CarSat1 | red    | na |
| chrUn | 66796462 | 66797182 | 721  | CarSat1 | red    | na |
| chrUn | 66797198 | 66798158 | 961  | CarSat1 | red    | na |
| chrUn | 66798185 | 66798654 | 470  | CarSat1 | red    | na |
| chrUn | 66798670 | 66799470 | 801  | CarSat1 | red    | na |
| chrUn | 66801526 | 66801978 | 453  | CarSat1 | red    | na |
| chrUn | 66801994 | 66802714 | 721  | CarSat1 | red    | na |
| chrUn | 66802730 | 66803451 | 722  | CarSat1 | red    | na |
| chrUn | 66803467 | 66804429 | 963  | CarSat1 | red    | na |
| chrUn | 66804456 | 66805661 | 1206 | CarSat1 | red    | na |
| chrUn | 66805677 | 66806638 | 962  | CarSat1 | red    | na |
| chrUn | 66806665 | 66808111 | 1447 | CarSat1 | red    | na |
| chrUn | 66808138 | 66809110 | 973  | CarSat1 | red    | na |
| chrUn | 66810110 | 66810707 | 598  | CarSat1 | red    | na |
| chrUn | 66810723 | 66811929 | 1207 | CarSat1 | red    | na |
| chrUn | 66811956 | 66812915 | 960  | CarSat1 | red    | na |
| chrUn | 66812931 | 66813651 | 721  | CarSat1 | red    | na |
| chrUn | 66813667 | 66814604 | 938  | CarSat1 | red    | na |
| chrUn | 66814619 | 66814746 | 128  | Carsat2 | orange | na |

|       |          |          |      |         |        |    |
|-------|----------|----------|------|---------|--------|----|
| chrUn | 66814634 | 66816074 | 1441 | CarSat1 | red    | na |
| chrUn | 66816104 | 66816598 | 495  | CarSat1 | red    | na |
| chrUn | 66816614 | 66817326 | 713  | CarSat1 | red    | na |
| chrUn | 66817350 | 66818811 | 1462 | CarSat1 | red    | na |
| chrUn | 66818827 | 66819296 | 470  | CarSat1 | red    | na |
| chrUn | 66819323 | 66821217 | 1895 | CarSat1 | red    | na |
| chrUn | 66821257 | 66822486 | 1230 | CarSat1 | red    | na |
| chrUn | 66822502 | 66823660 | 1159 | CarSat1 | red    | na |
| chrUn | 66825157 | 66826324 | 1168 | Sat2CF  | purple | na |
| chrUn | 66825364 | 66826345 | 982  | Sat2CF  | purple | na |
| chrUn | 66826217 | 66826382 | 166  | Sat2CF  | purple | na |
| chrUn | 66839354 | 66839939 | 586  | CarSat1 | red    | na |
| chrUn | 66839966 | 66840677 | 712  | CarSat1 | red    | na |
| chrUn | 66840704 | 66842151 | 1448 | CarSat1 | red    | na |
| chrUn | 66842178 | 66842647 | 470  | CarSat1 | red    | na |
| chrUn | 66842663 | 66844123 | 1461 | CarSat1 | red    | na |
| chrUn | 66844139 | 66847799 | 3661 | CarSat1 | red    | na |
| chrUn | 66847824 | 66848542 | 719  | CarSat1 | red    | na |
| chrUn | 66848567 | 66850751 | 2185 | CarSat1 | red    | na |
| chrUn | 66850776 | 66851478 | 703  | CarSat1 | red    | na |
| chrUn | 66851503 | 66852224 | 722  | CarSat1 | red    | na |
| chrUn | 66852249 | 66852912 | 664  | CarSat1 | red    | na |
| chrUn | 66886094 | 66887017 | 924  | CarSat1 | red    | na |
| chrUn | 66887044 | 66887751 | 708  | CarSat1 | red    | na |
| chrUn | 66887778 | 66888487 | 710  | CarSat1 | red    | na |
| chrUn | 66888514 | 66889956 | 1443 | CarSat1 | red    | na |
| chrUn | 66889983 | 66890452 | 470  | CarSat1 | red    | na |
| chrUn | 66890468 | 66891191 | 724  | CarSat1 | red    | na |
| chrUn | 66891207 | 66892907 | 1701 | CarSat1 | red    | na |
| chrUn | 66892934 | 66893648 | 715  | CarSat1 | red    | na |
| chrUn | 66893675 | 66894385 | 711  | CarSat1 | red    | na |
| chrUn | 66894412 | 66895124 | 713  | CarSat1 | red    | na |
| chrUn | 66895151 | 66895861 | 711  | CarSat1 | red    | na |
| chrUn | 66895888 | 66896355 | 468  | CarSat1 | red    | na |
| chrUn | 66896371 | 66897333 | 963  | CarSat1 | red    | na |
| chrUn | 66897358 | 66898070 | 713  | CarSat1 | red    | na |
| chrUn | 66898097 | 66898805 | 709  | CarSat1 | red    | na |
| chrUn | 66898832 | 66899674 | 843  | CarSat1 | red    | na |
| chrUn | 66900674 | 66903958 | 3285 | SAT1_CF | blue   | na |
| chrUn | 66903957 | 66904174 | 218  | CarSat1 | red    | na |
| chrUn | 66904384 | 66905377 | 994  | CarSat1 | red    | na |
| chrUn | 66905393 | 66906114 | 722  | CarSat1 | red    | na |

|       |          |          |      |         |        |    |
|-------|----------|----------|------|---------|--------|----|
| chrUn | 66906132 | 66907642 | 1511 | CarSat1 | red    | na |
| chrUn | 66907663 | 66908518 | 856  | CarSat1 | red    | na |
| chrUn | 66908539 | 66909063 | 525  | CarSat1 | red    | na |
| chrUn | 66909463 | 66910645 | 1183 | Sat2CF  | purple | na |
| chrUn | 66910537 | 66910716 | 180  | Sat2CF  | purple | na |
| chrUn | 66933112 | 66934034 | 923  | CarSat1 | red    | na |
| chrUn | 66934055 | 66935257 | 1203 | CarSat1 | red    | na |
| chrUn | 66935273 | 66935991 | 719  | CarSat1 | red    | na |
| chrUn | 66936007 | 66938203 | 2197 | CarSat1 | red    | na |
| chrUn | 66938219 | 66939378 | 1160 | CarSat1 | red    | na |
| chrUn | 66939822 | 66941027 | 1206 | CarSat1 | red    | na |
| chrUn | 66941043 | 66942005 | 963  | CarSat1 | red    | na |
| chrUn | 66942032 | 66942492 | 461  | CarSat1 | red    | na |
| chrUn | 66942517 | 66943237 | 721  | CarSat1 | red    | na |
| chrUn | 66943253 | 66943974 | 722  | CarSat1 | red    | na |
| chrUn | 66943990 | 66944703 | 714  | CarSat1 | red    | na |
| chrUn | 66944728 | 66945450 | 723  | CarSat1 | red    | na |
| chrUn | 66945466 | 66947076 | 1611 | CarSat1 | red    | na |
| chrUn | 66963350 | 66963969 | 620  | CarSat1 | red    | na |
| chrUn | 66963995 | 66964947 | 953  | CarSat1 | red    | na |
| chrUn | 66964974 | 66965683 | 710  | CarSat1 | red    | na |
| chrUn | 66965710 | 66966419 | 710  | CarSat1 | red    | na |
| chrUn | 66966445 | 66967650 | 1206 | CarSat1 | red    | na |
| chrUn | 66967666 | 66969859 | 2194 | CarSat1 | red    | na |
| chrUn | 66969875 | 66971335 | 1461 | CarSat1 | red    | na |
| chrUn | 66971351 | 66972063 | 713  | CarSat1 | red    | na |
| chrUn | 66972088 | 66973051 | 964  | CarSat1 | red    | na |
| chrUn | 66973078 | 66973776 | 699  | CarSat1 | red    | na |
| chrUn | 66973815 | 66974527 | 713  | CarSat1 | red    | na |
| chrUn | 66974565 | 66975019 | 455  | CarSat1 | red    | na |
| chrUn | 66975035 | 66976908 | 1874 | CarSat1 | red    | na |
| chrUn | 66977949 | 66979179 | 1231 | CarSat1 | red    | na |
| chrUn | 66979195 | 66979916 | 722  | CarSat1 | red    | na |
| chrUn | 66979932 | 66980401 | 470  | CarSat1 | red    | na |
| chrUn | 66980428 | 66981391 | 964  | CarSat1 | red    | na |
| chrUn | 66981407 | 66982128 | 722  | CarSat1 | red    | na |
| chrUn | 66982139 | 66982608 | 470  | CarSat1 | red    | na |
| chrUn | 66982635 | 66983594 | 960  | CarSat1 | red    | na |
| chrUn | 66983610 | 66985804 | 2195 | CarSat1 | red    | na |
| chrUn | 66985815 | 66986536 | 722  | CarSat1 | red    | na |
| chrUn | 66986552 | 66987756 | 1205 | CarSat1 | red    | na |
| chrUn | 66987783 | 66989482 | 1700 | CarSat1 | red    | na |

|       |          |          |      |         |        |    |
|-------|----------|----------|------|---------|--------|----|
| chrUn | 66989498 | 66990219 | 722  | CarSat1 | red    | na |
| chrUn | 66990235 | 66991435 | 1201 | CarSat1 | red    | na |
| chrUn | 66992457 | 66993498 | 1042 | CarSat1 | red    | na |
| chrUn | 66993525 | 66994236 | 712  | CarSat1 | red    | na |
| chrUn | 66994261 | 66995709 | 1449 | CarSat1 | red    | na |
| chrUn | 66995734 | 66997181 | 1448 | CarSat1 | red    | na |
| chrUn | 66997202 | 67000012 | 2811 | CarSat1 | red    | na |
| chrUn | 67000054 | 67001383 | 1330 | CarSat1 | red    | na |
| chrUn | 67001409 | 67003767 | 2359 | CarSat1 | red    | na |
| chrUn | 67003960 | 67004673 | 714  | CarSat1 | red    | na |
| chrUn | 67007124 | 67008158 | 1035 | CarSat1 | red    | na |
| chrUn | 67008183 | 67010884 | 2702 | CarSat1 | red    | na |
| chrUn | 67010914 | 67012358 | 1445 | CarSat1 | red    | na |
| chrUn | 67012388 | 67013096 | 709  | CarSat1 | red    | na |
| chrUn | 67013124 | 67013832 | 709  | CarSat1 | red    | na |
| chrUn | 67013860 | 67014796 | 937  | CarSat1 | red    | na |
| chrUn | 67014821 | 67015773 | 953  | CarSat1 | red    | na |
| chrUn | 67015800 | 67018000 | 2201 | CarSat1 | red    | na |
| chrUn | 67018027 | 67019007 | 981  | CarSat1 | red    | na |
| chrUn | 67019037 | 67019745 | 709  | CarSat1 | red    | na |
| chrUn | 67019775 | 67020623 | 849  | CarSat1 | red    | na |
| chrUn | 67053185 | 67053725 | 541  | CarSat1 | red    | na |
| chrUn | 67053746 | 67054459 | 714  | CarSat1 | red    | na |
| chrUn | 67054486 | 67056188 | 1703 | CarSat1 | red    | na |
| chrUn | 67056204 | 67058391 | 2188 | CarSat1 | red    | na |
| chrUn | 67059906 | 67060865 | 960  | CarSat1 | red    | na |
| chrUn | 67060890 | 67062829 | 1940 | CarSat1 | red    | na |
| chrUn | 67062850 | 67064300 | 1451 | CarSat1 | red    | na |
| chrUn | 67064321 | 67065289 | 969  | CarSat1 | red    | na |
| chrUn | 67065314 | 67066016 | 703  | CarSat1 | red    | na |
| chrUn | 67066041 | 67067502 | 1462 | CarSat1 | red    | na |
| chrUn | 67067527 | 67068061 | 535  | CarSat1 | red    | na |
| chrUn | 67069069 | 67069753 | 685  | CarSat1 | red    | na |
| chrUn | 67069783 | 67070490 | 708  | CarSat1 | red    | na |
| chrUn | 67070505 | 67070631 | 127  | Carsat2 | orange | na |
| chrUn | 67070520 | 67072711 | 2192 | CarSat1 | red    | na |
| chrUn | 67072741 | 67073448 | 708  | CarSat1 | red    | na |
| chrUn | 67073463 | 67073589 | 127  | Carsat2 | orange | na |
| chrUn | 67073478 | 67075931 | 2454 | CarSat1 | red    | na |
| chrUn | 67075952 | 67077401 | 1450 | CarSat1 | red    | na |
| chrUn | 67077422 | 67077865 | 444  | CarSat1 | red    | na |
| chrUn | 67077895 | 67080760 | 2866 | CarSat1 | red    | na |

|       |          |          |      |         |        |    |
|-------|----------|----------|------|---------|--------|----|
| chrUn | 67081245 | 67082537 | 1293 | CarSat1 | red    | na |
| chrUn | 67090975 | 67092125 | 1151 | Sat2CF  | purple | na |
| chrUn | 67091109 | 67092103 | 995  | Sat2CF  | purple | na |
| chrUn | 67112790 | 67113230 | 441  | Sat2CF  | purple | na |
| chrUn | 67112798 | 67113177 | 380  | Sat2CF  | purple | na |
| chrUn | 67140260 | 67141841 | 1582 | CarSat1 | red    | na |
| chrUn | 67141872 | 67143461 | 1590 | CarSat1 | red    | na |
| chrUn | 67143482 | 67144389 | 908  | CarSat1 | red    | na |
| chrUn | 67144453 | 67145235 | 783  | CarSat1 | red    | na |
| chrUn | 67145256 | 67146513 | 1258 | CarSat1 | red    | na |
| chrUn | 67146892 | 67147778 | 887  | CarSat1 | red    | na |
| chrUn | 67151310 | 67153566 | 2257 | CarSat1 | red    | na |
| chrUn | 67153593 | 67154303 | 711  | CarSat1 | red    | na |
| chrUn | 67154328 | 67155040 | 713  | CarSat1 | red    | na |
| chrUn | 67155067 | 67156120 | 1054 | CarSat1 | red    | na |
| chrUn | 67156539 | 67158477 | 1939 | CarSat1 | red    | na |
| chrUn | 67158493 | 67159949 | 1457 | CarSat1 | red    | na |
| chrUn | 67159965 | 67161422 | 1458 | CarSat1 | red    | na |
| chrUn | 67161438 | 67162158 | 721  | CarSat1 | red    | na |
| chrUn | 67162174 | 67163405 | 1232 | CarSat1 | red    | na |
| chrUn | 67163435 | 67164371 | 937  | CarSat1 | red    | na |
| chrUn | 67164387 | 67165096 | 710  | CarSat1 | red    | na |
| chrUn | 67166806 | 67167506 | 701  | CarSat1 | red    | na |
| chrUn | 67170053 | 67170168 | 116  | Carsat2 | orange | na |
| chrUn | 67170068 | 67171290 | 1223 | CarSat1 | red    | na |
| chrUn | 67171324 | 67172027 | 704  | CarSat1 | red    | na |
| chrUn | 67172051 | 67173155 | 1105 | CarSat1 | red    | na |
| chrUn | 67173338 | 67177467 | 4130 | CarSat1 | red    | na |
| chrUn | 67177993 | 67179670 | 1678 | CarSat1 | red    | na |
| chrUn | 67181461 | 67183047 | 1587 | CarSat1 | red    | na |
| chrUn | 67183068 | 67184191 | 1124 | CarSat1 | red    | na |
| chrUn | 67199546 | 67200266 | 721  | CarSat1 | red    | na |
| chrUn | 67200283 | 67201246 | 964  | CarSat1 | red    | na |
| chrUn | 67201273 | 67202478 | 1206 | CarSat1 | red    | na |
| chrUn | 67202495 | 67203724 | 1230 | CarSat1 | red    | na |
| chrUn | 67203754 | 67203908 | 155  | CarSat1 | red    | na |
| chrUn | 67204095 | 67206361 | 2267 | CarSat1 | red    | na |
| chrUn | 67206377 | 67207604 | 1228 | CarSat1 | red    | na |
| chrUn | 67207639 | 67209310 | 1672 | CarSat1 | red    | na |
| chrUn | 67209326 | 67211522 | 2197 | CarSat1 | red    | na |
| chrUn | 67211538 | 67212853 | 1316 | CarSat1 | red    | na |
| chrUn | 67217738 | 67218695 | 958  | CarSat1 | red    | na |

|       |          |          |              |        |    |
|-------|----------|----------|--------------|--------|----|
| chrUn | 67218714 | 67219570 | 857 CarSat1  | red    | na |
| chrUn | 67219591 | 67221842 | 2252 CarSat1 | red    | na |
| chrUn | 67221857 | 67223042 | 1186 CarSat1 | red    | na |
| chrUn | 67223047 | 67223478 | 432 SAT1_CF  | blue   | na |
| chrUn | 67223501 | 67224708 | 1208 SAT1_CF | blue   | na |
| chrUn | 67224769 | 67227178 | 2410 SAT1_CF | blue   | na |
| chrUn | 67228178 | 67228440 | 263 SAT1_CF  | blue   | na |
| chrUn | 67228520 | 67229379 | 860 SAT1_CF  | blue   | na |
| chrUn | 67229728 | 67230649 | 922 SAT1_CF  | blue   | na |
| chrUn | 67230676 | 67231194 | 519 SAT1_CF  | blue   | na |
| chrUn | 67231220 | 67231375 | 156 SAT1_CF  | blue   | na |
| chrUn | 67231588 | 67232204 | 617 SAT1_CF  | blue   | na |
| chrUn | 67232217 | 67232968 | 752 SAT1_CF  | blue   | na |
| chrUn | 67232990 | 67233571 | 582 SAT1_CF  | blue   | na |
| chrUn | 67233654 | 67234162 | 509 SAT1_CF  | blue   | na |
| chrUn | 67234205 | 67235201 | 997 SAT1_CF  | blue   | na |
| chrUn | 67235244 | 67235913 | 670 SAT1_CF  | blue   | na |
| chrUn | 67235931 | 67237020 | 1090 SAT1_CF | blue   | na |
| chrUn | 67237060 | 67237462 | 403 SAT1_CF  | blue   | na |
| chrUn | 67237473 | 67237992 | 520 SAT1_CF  | blue   | na |
| chrUn | 67238013 | 67238953 | 941 SAT1_CF  | blue   | na |
| chrUn | 67238971 | 67239472 | 502 SAT1_CF  | blue   | na |
| chrUn | 67239520 | 67240208 | 689 SAT1_CF  | blue   | na |
| chrUn | 67240228 | 67240721 | 494 SAT1_CF  | blue   | na |
| chrUn | 67241606 | 67241759 | 154 SAT1_CF  | blue   | na |
| chrUn | 67241771 | 67242493 | 723 SAT1_CF  | blue   | na |
| chrUn | 67243512 | 67245357 | 1846 CarSat1 | red    | na |
| chrUn | 67245372 | 67245498 | 127 Carsat2  | orange | na |
| chrUn | 67245387 | 67246094 | 708 CarSat1  | red    | na |
| chrUn | 67246124 | 67246832 | 709 CarSat1  | red    | na |
| chrUn | 67246862 | 67251252 | 4391 CarSat1 | red    | na |
| chrUn | 67251282 | 67251768 | 487 CarSat1  | red    | na |
| chrUn | 67251792 | 67256826 | 5035 CarSat1 | red    | na |
| chrUn | 67273412 | 67277161 | 3750 CarSat1 | red    | na |
| chrUn | 67277188 | 67277898 | 711 CarSat1  | red    | na |
| chrUn | 67277925 | 67278394 | 470 CarSat1  | red    | na |
| chrUn | 67278419 | 67282320 | 3902 CarSat1 | red    | na |
| chrUn | 67282349 | 67283546 | 1198 CarSat1 | red    | na |
| chrUn | 67283571 | 67284534 | 964 CarSat1  | red    | na |
| chrUn | 67284561 | 67285029 | 469 CarSat1  | red    | na |
| chrUn | 67285054 | 67286714 | 1661 CarSat1 | red    | na |
| chrUn | 67287809 | 67289671 | 1863 CarSat1 | red    | na |



|       |          |          |      |         |        |    |
|-------|----------|----------|------|---------|--------|----|
| chrUn | 67289704 | 67290195 | 492  | CarSat1 | red    | na |
| chrUn | 67290225 | 67290929 | 705  | CarSat1 | red    | na |
| chrUn | 67290963 | 67291664 | 702  | CarSat1 | red    | na |
| chrUn | 67291694 | 67292398 | 705  | CarSat1 | red    | na |
| chrUn | 67292428 | 67293132 | 705  | CarSat1 | red    | na |
| chrUn | 67293166 | 67293867 | 702  | CarSat1 | red    | na |
| chrUn | 67293897 | 67294601 | 705  | CarSat1 | red    | na |
| chrUn | 67294631 | 67295335 | 705  | CarSat1 | red    | na |
| chrUn | 67295369 | 67296541 | 1173 | CarSat1 | red    | na |
| chrUn | 67296562 | 67298274 | 1713 | CarSat1 | red    | na |
| chrUn | 67298308 | 67299006 | 699  | CarSat1 | red    | na |
| chrUn | 67299038 | 67299478 | 441  | CarSat1 | red    | na |
| chrUn | 67299499 | 67300213 | 715  | CarSat1 | red    | na |
| chrUn | 67300234 | 67301013 | 780  | CarSat1 | red    | na |
| chrUn | 67302029 | 67304215 | 2187 | CarSat1 | red    | na |
| chrUn | 67304239 | 67305443 | 1205 | CarSat1 | red    | na |
| chrUn | 67305464 | 67306648 | 1185 | CarSat1 | red    | na |
| chrUn | 67306678 | 67308859 | 2182 | CarSat1 | red    | na |
| chrUn | 67308874 | 67309000 | 127  | Carsat2 | orange | na |
| chrUn | 67308889 | 67309372 | 484  | CarSat1 | red    | na |
| chrUn | 67309405 | 67310329 | 925  | CarSat1 | red    | na |
| chrUn | 67310359 | 67311578 | 1220 | CarSat1 | red    | na |
| chrUn | 67311602 | 67312543 | 942  | CarSat1 | red    | na |
| chrUn | 67312558 | 67312685 | 128  | Carsat2 | orange | na |
| chrUn | 67312573 | 67314530 | 1958 | CarSat1 | red    | na |
| chrUn | 67314554 | 67315268 | 715  | CarSat1 | red    | na |
| chrUn | 67316317 | 67316907 | 591  | SAT1_CF | blue   | na |
| chrUn | 67316922 | 67317058 | 137  | SAT1_CF | blue   | na |
| chrUn | 67317126 | 67317619 | 494  | SAT1_CF | blue   | na |
| chrUn | 67317639 | 67318243 | 605  | SAT1_CF | blue   | na |
| chrUn | 67318256 | 67318938 | 683  | SAT1_CF | blue   | na |
| chrUn | 67318950 | 67319811 | 862  | SAT1_CF | blue   | na |
| chrUn | 67319853 | 67320632 | 780  | SAT1_CF | blue   | na |
| chrUn | 67320712 | 67321736 | 1025 | SAT1_CF | blue   | na |
| chrUn | 67321749 | 67323947 | 2199 | SAT1_CF | blue   | na |
| chrUn | 67323968 | 67324488 | 521  | SAT1_CF | blue   | na |
| chrUn | 67324501 | 67325158 | 658  | SAT1_CF | blue   | na |
| chrUn | 67325170 | 67325845 | 676  | SAT1_CF | blue   | na |
| chrUn | 67325888 | 67327485 | 1598 | SAT1_CF | blue   | na |
| chrUn | 67327528 | 67328029 | 502  | SAT1_CF | blue   | na |
| chrUn | 67328056 | 67328723 | 668  | SAT1_CF | blue   | na |
| chrUn | 67328735 | 67329573 | 839  | SAT1_CF | blue   | na |

|       |          |          |              |        |    |
|-------|----------|----------|--------------|--------|----|
| chrUn | 67355089 | 67355728 | 640 SAT1_CF  | blue   | na |
| chrUn | 67355805 | 67356665 | 861 SAT1_CF  | blue   | na |
| chrUn | 67356677 | 67357158 | 482 SAT1_CF  | blue   | na |
| chrUn | 67358434 | 67359009 | 576 SAT1_CF  | blue   | na |
| chrUn | 67359052 | 67360164 | 1113 SAT1_CF | blue   | na |
| chrUn | 67360207 | 67360927 | 721 SAT1_CF  | blue   | na |
| chrUn | 67362854 | 67363288 | 435 SAT1_CF  | blue   | na |
| chrUn | 67363300 | 67363782 | 483 SAT1_CF  | blue   | na |
| chrUn | 67363838 | 67364763 | 926 SAT1_CF  | blue   | na |
| chrUn | 67364823 | 67364968 | 146 SAT1_CF  | blue   | na |
| chrUn | 67365007 | 67365525 | 519 SAT1_CF  | blue   | na |
| chrUn | 67365571 | 67366939 | 1369 SAT1_CF | blue   | na |
| chrUn | 67366953 | 67367842 | 890 SAT1_CF  | blue   | na |
| chrUn | 67367854 | 67368527 | 674 SAT1_CF  | blue   | na |
| chrUn | 67368556 | 67368870 | 315 SAT1_CF  | blue   | na |
| chrUn | 67370085 | 67370356 | 272 SAT1_CF  | blue   | na |
| chrUn | 67370375 | 67370945 | 571 SAT1_CF  | blue   | na |
| chrUn | 67371031 | 67371167 | 137 SAT1_CF  | blue   | na |
| chrUn | 67373662 | 67373735 | 74 SAT1_CF   | blue   | na |
| chrUn | 67373747 | 67375164 | 1418 SAT1_CF | blue   | na |
| chrUn | 67376194 | 67380820 | 4627 CarSat1 | red    | na |
| chrUn | 67380847 | 67382294 | 1448 CarSat1 | red    | na |
| chrUn | 67382321 | 67383788 | 1468 CarSat1 | red    | na |
| chrUn | 67384170 | 67385278 | 1109 CarSat1 | red    | na |
| chrUn | 67385303 | 67386256 | 954 CarSat1  | red    | na |
| chrUn | 67386283 | 67388549 | 2267 CarSat1 | red    | na |
| chrUn | 67388576 | 67389346 | 771 CarSat1  | red    | na |
| chrUn | 67409294 | 67410167 | 874 CarSat1  | red    | na |
| chrUn | 67410271 | 67411119 | 849 CarSat1  | red    | na |
| chrUn | 67411140 | 67411998 | 859 CarSat1  | red    | na |
| chrUn | 67412144 | 67412771 | 628 CarSat1  | red    | na |
| chrUn | 67413026 | 67413361 | 336 CarSat1  | red    | na |
| chrUn | 67413544 | 67413956 | 413 CarSat1  | red    | na |
| chrUn | 67414106 | 67414829 | 724 CarSat1  | red    | na |
| chrUn | 67414856 | 67415705 | 850 CarSat1  | red    | na |
| chrUn | 67415725 | 67416530 | 806 CarSat1  | red    | na |
| chrUn | 67416722 | 67417786 | 1065 CarSat1 | red    | na |
| chrUn | 67418925 | 67419112 | 188 Carsat2  | orange | na |
| chrUn | 67418944 | 67420139 | 1196 CarSat1 | red    | na |
| chrUn | 67420169 | 67420661 | 493 CarSat1  | red    | na |
| chrUn | 67420679 | 67422863 | 2185 CarSat1 | red    | na |
| chrUn | 67422887 | 67423608 | 722 CarSat1  | red    | na |

|       |          |          |      |         |        |    |
|-------|----------|----------|------|---------|--------|----|
| chrUn | 67423624 | 67425296 | 1673 | CarSat1 | red    | na |
| chrUn | 67425326 | 67432117 | 6792 | CarSat1 | red    | na |
| chrUn | 67433138 | 67434594 | 1457 | CarSat1 | red    | na |
| chrUn | 67434618 | 67435104 | 487  | CarSat1 | red    | na |
| chrUn | 67435134 | 67435593 | 460  | CarSat1 | red    | na |
| chrUn | 67435604 | 67437056 | 1453 | CarSat1 | red    | na |
| chrUn | 67437078 | 67439996 | 2919 | CarSat1 | red    | na |
| chrUn | 67440017 | 67441482 | 1466 | CarSat1 | red    | na |
| chrUn | 67441493 | 67441963 | 471  | CarSat1 | red    | na |
| chrUn | 67441987 | 67444682 | 2696 | CarSat1 | red    | na |
| chrUn | 67444712 | 67446332 | 1621 | CarSat1 | red    | na |
| chrUn | 67447337 | 67448431 | 1095 | CarSat1 | red    | na |
| chrUn | 67448447 | 67449649 | 1203 | CarSat1 | red    | na |
| chrUn | 67449676 | 67450116 | 441  | CarSat1 | red    | na |
| chrUn | 67450146 | 67451374 | 1229 | CarSat1 | red    | na |
| chrUn | 67451390 | 67453587 | 2198 | CarSat1 | red    | na |
| chrUn | 67453603 | 67454322 | 720  | CarSat1 | red    | na |
| chrUn | 67454338 | 67455545 | 1208 | CarSat1 | red    | na |
| chrUn | 67455567 | 67457020 | 1454 | CarSat1 | red    | na |
| chrUn | 67457047 | 67458493 | 1447 | CarSat1 | red    | na |
| chrUn | 67458520 | 67459481 | 962  | CarSat1 | red    | na |
| chrUn | 67459497 | 67460521 | 1025 | CarSat1 | red    | na |
| chrUn | 67544272 | 67545179 | 908  | CarSat1 | red    | na |
| chrUn | 67545418 | 67545915 | 498  | CarSat1 | red    | na |
| chrUn | 67545936 | 67546781 | 846  | CarSat1 | red    | na |
| chrUn | 67547497 | 67550060 | 2564 | CarSat1 | red    | na |
| chrUn | 67550581 | 67551340 | 760  | CarSat1 | red    | na |
| chrUn | 67551370 | 67552296 | 927  | CarSat1 | red    | na |
| chrUn | 67552329 | 67552814 | 486  | CarSat1 | red    | na |
| chrUn | 67552844 | 67554306 | 1463 | CarSat1 | red    | na |
| chrUn | 67554321 | 67555027 | 707  | CarSat1 | red    | na |
| chrUn | 67555057 | 67556029 | 973  | CarSat1 | red    | na |
| chrUn | 67556685 | 67559389 | 2705 | CarSat1 | red    | na |
| chrUn | 67560521 | 67561224 | 704  | CarSat1 | red    | na |
| chrUn | 67561250 | 67562218 | 969  | CarSat1 | red    | na |
| chrUn | 67562239 | 67562708 | 470  | CarSat1 | red    | na |
| chrUn | 67562733 | 67565427 | 2695 | CarSat1 | red    | na |
| chrUn | 67565467 | 67567376 | 1910 | CarSat1 | red    | na |
| chrUn | 67567397 | 67569256 | 1860 | CarSat1 | red    | na |
| chrUn | 67569261 | 67569405 | 145  | Carsat2 | orange | na |
| chrUn | 67569366 | 67572533 | 3168 | CarSat1 | red    | na |
| chrUn | 67572554 | 67573593 | 1040 | CarSat1 | red    | na |

|       |          |          |      |         |        |    |
|-------|----------|----------|------|---------|--------|----|
| chrUn | 67574634 | 67575687 | 1054 | CarSat1 | red    | na |
| chrUn | 67575702 | 67576257 | 556  | CarSat1 | red    | na |
| chrUn | 67576351 | 67577226 | 876  | CarSat1 | red    | na |
| chrUn | 67577241 | 67577963 | 723  | CarSat1 | red    | na |
| chrUn | 67577978 | 67579435 | 1458 | CarSat1 | red    | na |
| chrUn | 67579450 | 67581650 | 2201 | CarSat1 | red    | na |
| chrUn | 67581665 | 67582387 | 723  | CarSat1 | red    | na |
| chrUn | 67582402 | 67583579 | 1178 | CarSat1 | red    | na |
| chrUn | 67583605 | 67584580 | 976  | CarSat1 | red    | na |
| chrUn | 67584618 | 67585332 | 715  | CarSat1 | red    | na |
| chrUn | 67585347 | 67586069 | 723  | CarSat1 | red    | na |
| chrUn | 67586084 | 67586806 | 723  | CarSat1 | red    | na |
| chrUn | 67586821 | 67587680 | 860  | CarSat1 | red    | na |
| chrUn | 67615907 | 67617011 | 1105 | Sat7CF  | lime   | na |
| chrUn | 67631544 | 67632651 | 1108 | Sat2CF  | purple | na |
| chrUn | 67634269 | 67634977 | 709  | CarSat1 | red    | na |
| chrUn | 67635006 | 67635697 | 692  | CarSat1 | red    | na |
| chrUn | 67635742 | 67636721 | 980  | CarSat1 | red    | na |
| chrUn | 67636748 | 67637459 | 712  | CarSat1 | red    | na |
| chrUn | 67637486 | 67638449 | 964  | CarSat1 | red    | na |
| chrUn | 67638474 | 67640135 | 1662 | CarSat1 | red    | na |
| chrUn | 67640165 | 67641144 | 980  | CarSat1 | red    | na |
| chrUn | 67641171 | 67641611 | 441  | CarSat1 | red    | na |
| chrUn | 67641641 | 67647223 | 5583 | CarSat1 | red    | na |
| chrUn | 67662810 | 67663624 | 815  | CarSat1 | red    | na |
| chrUn | 67663651 | 67665565 | 1915 | CarSat1 | red    | na |
| chrUn | 67665595 | 67666574 | 980  | CarSat1 | red    | na |
| chrUn | 67666601 | 67667779 | 1179 | CarSat1 | red    | na |
| chrUn | 67667809 | 67668510 | 702  | CarSat1 | red    | na |
| chrUn | 67668547 | 67669525 | 979  | CarSat1 | red    | na |
| chrUn | 67669552 | 67670505 | 954  | CarSat1 | red    | na |
| chrUn | 67670527 | 67671463 | 937  | CarSat1 | red    | na |
| chrUn | 67671493 | 67673210 | 1718 | CarSat1 | red    | na |
| chrUn | 67673237 | 67674189 | 953  | CarSat1 | red    | na |
| chrUn | 67674214 | 67675121 | 908  | CarSat1 | red    | na |
| chrUn | 67675303 | 67675786 | 484  | CarSat1 | red    | na |
| chrUn | 67694190 | 67695974 | 1785 | CarSat1 | red    | na |
| chrUn | 67696001 | 67696710 | 710  | CarSat1 | red    | na |
| chrUn | 67696737 | 67698920 | 2184 | CarSat1 | red    | na |
| chrUn | 67698947 | 67699901 | 955  | CarSat1 | red    | na |
| chrUn | 67699935 | 67700394 | 460  | CarSat1 | red    | na |
| chrUn | 67700421 | 67701132 | 712  | CarSat1 | red    | na |

|       |          |          |      |         |        |    |
|-------|----------|----------|------|---------|--------|----|
| chrUn | 67701159 | 67701871 | 713  | CarSat1 | red    | na |
| chrUn | 67701896 | 67702608 | 713  | CarSat1 | red    | na |
| chrUn | 67702637 | 67704082 | 1446 | CarSat1 | red    | na |
| chrUn | 67704109 | 67705063 | 955  | CarSat1 | red    | na |
| chrUn | 67705097 | 67706296 | 1200 | CarSat1 | red    | na |
| chrUn | 67706317 | 67707214 | 898  | CarSat1 | red    | na |
| chrUn | 67708218 | 67710001 | 1784 | CarSat1 | red    | na |
| chrUn | 67710031 | 67710732 | 702  | CarSat1 | red    | na |
| chrUn | 67710769 | 67711476 | 708  | CarSat1 | red    | na |
| chrUn | 67711506 | 67712547 | 1042 | CarSat1 | red    | na |
| chrUn | 67712568 | 67713474 | 907  | CarSat1 | red    | na |
| chrUn | 67713538 | 67714320 | 783  | CarSat1 | red    | na |
| chrUn | 67714341 | 67715783 | 1443 | CarSat1 | red    | na |
| chrUn | 67715934 | 67716884 | 951  | CarSat1 | red    | na |
| chrUn | 67716923 | 67716968 | 46   | HSATII  | na     | na |
| chrUn | 67722266 | 67723703 | 1438 | CarSat1 | red    | na |
| chrUn | 67723725 | 67726659 | 2935 | CarSat1 | red    | na |
| chrUn | 67726684 | 67727881 | 1198 | CarSat1 | red    | na |
| chrUn | 67727908 | 67730337 | 2430 | CarSat1 | red    | na |
| chrUn | 67730359 | 67732299 | 1941 | CarSat1 | red    | na |
| chrUn | 67732326 | 67733289 | 964  | CarSat1 | red    | na |
| chrUn | 67733314 | 67735203 | 1890 | CarSat1 | red    | na |
| chrUn | 67741688 | 67742807 | 1120 | Sat2CF  | purple | na |
| chrUn | 67743206 | 67743730 | 525  | CarSat1 | red    | na |
| chrUn | 67743751 | 67744527 | 777  | CarSat1 | red    | na |
| chrUn | 67744627 | 67745942 | 1316 | CarSat1 | red    | na |
| chrUn | 67746484 | 67747178 | 695  | CarSat1 | red    | na |
| chrUn | 67747198 | 67748190 | 993  | CarSat1 | red    | na |
| chrUn | 67748389 | 67748600 | 212  | CarSat1 | red    | na |
| chrUn | 67748605 | 67748917 | 313  | SAT1_CF | blue   | na |
| chrUn | 67750422 | 67751111 | 690  | SAT1_CF | blue   | na |
| chrUn | 67751106 | 67751824 | 719  | CarSat1 | red    | na |
| chrUn | 67761811 | 67762995 | 1185 | Sat2CF  | purple | na |
| chrUn | 67761944 | 67762981 | 1038 | Sat2CF  | purple | na |
| chrUn | 67769347 | 67769973 | 627  | SAT1_CF | blue   | na |
| chrUn | 67769986 | 67770305 | 320  | SAT1_CF | blue   | na |
| chrUn | 67770380 | 67770859 | 480  | SAT1_CF | blue   | na |
| chrUn | 67770886 | 67771672 | 787  | SAT1_CF | blue   | na |
| chrUn | 67771695 | 67772240 | 546  | SAT1_CF | blue   | na |
| chrUn | 67772282 | 67774146 | 1865 | SAT1_CF | blue   | na |
| chrUn | 67774158 | 67775049 | 892  | SAT1_CF | blue   | na |
| chrUn | 67775062 | 67775168 | 107  | SAT1_CF | blue   | na |

|       |          |          |              |      |    |
|-------|----------|----------|--------------|------|----|
| chrUn | 67775193 | 67775746 | 554 SAT1_CF  | blue | na |
| chrUn | 67775758 | 67777269 | 1512 SAT1_CF | blue | na |
| chrUn | 67777339 | 67778395 | 1057 SAT1_CF | blue | na |
| chrUn | 67778409 | 67778506 | 98 SAT1_CF   | blue | na |
| chrUn | 67778534 | 67779625 | 1092 SAT1_CF | blue | na |
| chrUn | 67779652 | 67781147 | 1496 SAT1_CF | blue | na |
| chrUn | 67781229 | 67781736 | 508 SAT1_CF  | blue | na |
| chrUn | 67781749 | 67782274 | 526 SAT1_CF  | blue | na |
| chrUn | 67783276 | 67785132 | 1857 CarSat1 | red  | na |
| chrUn | 67785159 | 67785628 | 470 CarSat1  | red  | na |
| chrUn | 67785644 | 67786606 | 963 CarSat1  | red  | na |
| chrUn | 67786633 | 67787340 | 708 CarSat1  | red  | na |
| chrUn | 67787367 | 67787835 | 469 CarSat1  | red  | na |
| chrUn | 67787851 | 67788812 | 962 CarSat1  | red  | na |
| chrUn | 67788842 | 67789550 | 709 CarSat1  | red  | na |
| chrUn | 67789577 | 67790782 | 1206 CarSat1 | red  | na |
| chrUn | 67790798 | 67791517 | 720 CarSat1  | red  | na |
| chrUn | 67791533 | 67793231 | 1699 CarSat1 | red  | na |
| chrUn | 67793258 | 67793967 | 710 CarSat1  | red  | na |
| chrUn | 67793994 | 67794703 | 710 CarSat1  | red  | na |
| chrUn | 67794730 | 67795190 | 461 CarSat1  | red  | na |
| chrUn | 67795215 | 67796176 | 962 CarSat1  | red  | na |
| chrUn | 67797274 | 67801093 | 3820 CarSat1 | red  | na |
| chrUn | 67801120 | 67801685 | 566 CarSat1  | red  | na |
| chrUn | 67802194 | 67803100 | 907 CarSat1  | red  | na |
| chrUn | 67803130 | 67805039 | 1910 CarSat1 | red  | na |
| chrUn | 67805066 | 67805776 | 711 CarSat1  | red  | na |
| chrUn | 67805801 | 67806510 | 710 CarSat1  | red  | na |
| chrUn | 67806537 | 67808480 | 1944 CarSat1 | red  | na |
| chrUn | 67808496 | 67809458 | 963 CarSat1  | red  | na |
| chrUn | 67809485 | 67810194 | 710 CarSat1  | red  | na |
| chrUn | 67815489 | 67818387 | 2899 SAT1_CF | blue | na |
| chrUn | 67818399 | 67819027 | 629 SAT1_CF  | blue | na |
| chrUn | 67819107 | 67819780 | 674 SAT1_CF  | blue | na |
| chrUn | 67819804 | 67820429 | 626 SAT1_CF  | blue | na |
| chrUn | 67820470 | 67821510 | 1041 SAT1_CF | blue | na |
| chrUn | 67821537 | 67822858 | 1322 SAT1_CF | blue | na |
| chrUn | 67822877 | 67823485 | 609 SAT1_CF  | blue | na |
| chrUn | 67823506 | 67824131 | 626 SAT1_CF  | blue | na |
| chrUn | 67839112 | 67840016 | 905 CarSat1  | red  | na |
| chrUn | 67840046 | 67840769 | 724 CarSat1  | red  | na |
| chrUn | 67840784 | 67841507 | 724 CarSat1  | red  | na |

|       |          |          |      |         |        |    |
|-------|----------|----------|------|---------|--------|----|
| chrUn | 67841522 | 67844454 | 2933 | CarSat1 | red    | na |
| chrUn | 67844469 | 67845176 | 708  | CarSat1 | red    | na |
| chrUn | 67845206 | 67845927 | 722  | CarSat1 | red    | na |
| chrUn | 67845942 | 67846649 | 708  | CarSat1 | red    | na |
| chrUn | 67846679 | 67847400 | 722  | CarSat1 | red    | na |
| chrUn | 67847415 | 67848860 | 1446 | CarSat1 | red    | na |
| chrUn | 67848890 | 67850347 | 1458 | CarSat1 | red    | na |
| chrUn | 67850362 | 67852025 | 1664 | CarSat1 | red    | na |
| chrUn | 67870635 | 67871511 | 877  | CarSat1 | red    | na |
| chrUn | 67871538 | 67872249 | 712  | CarSat1 | red    | na |
| chrUn | 67872276 | 67873255 | 980  | CarSat1 | red    | na |
| chrUn | 67873285 | 67874948 | 1664 | CarSat1 | red    | na |
| chrUn | 67874974 | 67876677 | 1704 | CarSat1 | red    | na |
| chrUn | 67876694 | 67877304 | 611  | CarSat1 | red    | na |
| chrUn | 67877498 | 67878197 | 700  | CarSat1 | red    | na |
| chrUn | 67899103 | 67899229 | 127  | Carsat2 | orange | na |
| chrUn | 67899118 | 67901297 | 2180 | CarSat1 | red    | na |
| chrUn | 67901312 | 67901438 | 127  | Carsat2 | orange | na |
| chrUn | 67901327 | 67902038 | 712  | CarSat1 | red    | na |
| chrUn | 67902068 | 67902129 | 62   | CarSat1 | red    | na |
| chrUn | 67902318 | 67902989 | 672  | CarSat1 | red    | na |
| chrUn | 67903004 | 67903131 | 128  | Carsat2 | orange | na |
| chrUn | 67903019 | 67903726 | 708  | CarSat1 | red    | na |
| chrUn | 67903741 | 67903867 | 127  | Carsat2 | orange | na |
| chrUn | 67903756 | 67904463 | 708  | CarSat1 | red    | na |
| chrUn | 67904478 | 67904605 | 128  | Carsat2 | orange | na |
| chrUn | 67904493 | 67905936 | 1444 | CarSat1 | red    | na |
| chrUn | 67905966 | 67907413 | 1448 | CarSat1 | red    | na |
| chrUn | 67907443 | 67908150 | 708  | CarSat1 | red    | na |
| chrUn | 67908165 | 67908291 | 127  | Carsat2 | orange | na |
| chrUn | 67908180 | 67911113 | 2934 | CarSat1 | red    | na |
| chrUn | 67911128 | 67911255 | 128  | Carsat2 | orange | na |
| chrUn | 67911143 | 67911929 | 787  | CarSat1 | red    | na |
| chrUn | 67926855 | 67927891 | 1037 | CarSat1 | red    | na |
| chrUn | 67927917 | 67928629 | 713  | CarSat1 | red    | na |
| chrUn | 67928650 | 67930580 | 1931 | CarSat1 | red    | na |
| chrUn | 67930606 | 67931326 | 721  | CarSat1 | red    | na |
| chrUn | 67931351 | 67932054 | 704  | CarSat1 | red    | na |
| chrUn | 67932079 | 67934519 | 2441 | CarSat1 | red    | na |
| chrUn | 67934540 | 67935532 | 993  | CarSat1 | red    | na |
| chrUn | 67935547 | 67936727 | 1181 | CarSat1 | red    | na |
| chrUn | 67936748 | 67937952 | 1205 | CarSat1 | red    | na |

|       |          |          |      |         |        |    |
|-------|----------|----------|------|---------|--------|----|
| chrUn | 67937977 | 67938936 | 960  | CarSat1 | red    | na |
| chrUn | 67938957 | 67939672 | 716  | CarSat1 | red    | na |
| chrUn | 67947496 | 67947779 | 284  | SAT1_CF | blue   | na |
| chrUn | 67952357 | 67953034 | 678  | Sat2CF  | purple | na |
| chrUn | 67954541 | 67955055 | 515  | CarSat1 | red    | na |
| chrUn | 67955082 | 67955792 | 711  | CarSat1 | red    | na |
| chrUn | 67955819 | 67956288 | 470  | CarSat1 | red    | na |
| chrUn | 67956304 | 67957269 | 966  | CarSat1 | red    | na |
| chrUn | 67957296 | 67958005 | 710  | CarSat1 | red    | na |
| chrUn | 67958032 | 67958501 | 470  | CarSat1 | red    | na |
| chrUn | 67958517 | 67959742 | 1226 | CarSat1 | red    | na |
| chrUn | 67959772 | 67960708 | 937  | CarSat1 | red    | na |
| chrUn | 67960724 | 67961686 | 963  | CarSat1 | red    | na |
| chrUn | 67961713 | 67962690 | 978  | CarSat1 | red    | na |
| chrUn | 67962720 | 67963426 | 707  | CarSat1 | red    | na |
| chrUn | 67963457 | 67965131 | 1675 | CarSat1 | red    | na |
| chrUn | 67965147 | 67966607 | 1461 | CarSat1 | red    | na |
| chrUn | 67966623 | 67967343 | 721  | CarSat1 | red    | na |
| chrUn | 67968390 | 67969100 | 711  | CarSat1 | red    | na |
| chrUn | 67969127 | 67970324 | 1198 | CarSat1 | red    | na |
| chrUn | 67970349 | 67971310 | 962  | CarSat1 | red    | na |
| chrUn | 67971337 | 67971806 | 470  | CarSat1 | red    | na |
| chrUn | 67971822 | 67972785 | 964  | CarSat1 | red    | na |
| chrUn | 67972812 | 67973522 | 711  | CarSat1 | red    | na |
| chrUn | 67973549 | 67974258 | 710  | CarSat1 | red    | na |
| chrUn | 67974286 | 67975493 | 1208 | CarSat1 | red    | na |
| chrUn | 67975509 | 67977203 | 1695 | CarSat1 | red    | na |
| chrUn | 67977230 | 67979175 | 1946 | CarSat1 | red    | na |
| chrUn | 67979191 | 67979904 | 714  | CarSat1 | red    | na |
| chrUn | 67979929 | 67981161 | 1233 | CarSat1 | red    | na |
| chrUn | 67986906 | 67987807 | 902  | Sat2CF  | purple | na |
| chrUn | 68011868 | 68014053 | 2186 | CarSat1 | red    | na |
| chrUn | 68014083 | 68014790 | 708  | CarSat1 | red    | na |
| chrUn | 68014820 | 68015797 | 978  | CarSat1 | red    | na |
| chrUn | 68015818 | 68017738 | 1921 | CarSat1 | red    | na |
| chrUn | 68017753 | 68017880 | 128  | Carsat2 | orange | na |
| chrUn | 68017768 | 68018480 | 713  | CarSat1 | red    | na |
| chrUn | 68018495 | 68018622 | 128  | Carsat2 | orange | na |
| chrUn | 68018510 | 68019220 | 711  | CarSat1 | red    | na |
| chrUn | 68019250 | 68022148 | 2899 | CarSat1 | red    | na |
| chrUn | 68022163 | 68022289 | 127  | Carsat2 | orange | na |
| chrUn | 68022178 | 68024600 | 2423 | CarSat1 | red    | na |



|       |          |          |              |        |    |
|-------|----------|----------|--------------|--------|----|
| chrUn | 68036166 | 68037040 | 875 Sat2CF   | purple | na |
| chrUn | 68036241 | 68036964 | 724 Sat2CF   | purple | na |
| chrUn | 68043444 | 68044420 | 977 CarSat1  | red    | na |
| chrUn | 68044447 | 68045156 | 710 CarSat1  | red    | na |
| chrUn | 68045183 | 68045893 | 711 CarSat1  | red    | na |
| chrUn | 68045920 | 68047367 | 1448 CarSat1 | red    | na |
| chrUn | 68047394 | 68049095 | 1702 CarSat1 | red    | na |
| chrUn | 68049111 | 68049823 | 713 CarSat1  | red    | na |
| chrUn | 68049848 | 68051306 | 1459 CarSat1 | red    | na |
| chrUn | 68051331 | 68051791 | 461 CarSat1  | red    | na |
| chrUn | 68051818 | 68052781 | 964 CarSat1  | red    | na |
| chrUn | 68052806 | 68054990 | 2185 CarSat1 | red    | na |
| chrUn | 68055015 | 68055718 | 704 CarSat1  | red    | na |
| chrUn | 68055743 | 68056169 | 427 CarSat1  | red    | na |
| chrUn | 68057178 | 68057741 | 564 CarSat1  | red    | na |
| chrUn | 68057771 | 68060172 | 2402 CarSat1 | red    | na |
| chrUn | 68060197 | 68060690 | 494 CarSat1  | red    | na |
| chrUn | 68060721 | 68061429 | 709 CarSat1  | red    | na |
| chrUn | 68061459 | 68062921 | 1463 CarSat1 | red    | na |
| chrUn | 68062937 | 68063078 | 142 CarSat1  | red    | na |
| chrUn | 68063263 | 68063578 | 316 CarSat1  | red    | na |
| chrUn | 68063605 | 68065562 | 1958 CarSat1 | red    | na |
| chrUn | 68065574 | 68066075 | 502 CarSat1  | red    | na |
| chrUn | 68066090 | 68066797 | 708 CarSat1  | red    | na |
| chrUn | 68066827 | 68067553 | 727 CarSat1  | red    | na |
| chrUn | 68067568 | 68068290 | 723 CarSat1  | red    | na |
| chrUn | 68068305 | 68069031 | 727 CarSat1  | red    | na |
| chrUn | 68069046 | 68069906 | 861 CarSat1  | red    | na |
| chrUn | 68103562 | 68104515 | 954 CarSat1  | red    | na |
| chrUn | 68104536 | 68106131 | 1596 CarSat1 | red    | na |
| chrUn | 68127856 | 68128284 | 429 CarSat1  | red    | na |
| chrUn | 68128309 | 68129263 | 955 CarSat1  | red    | na |
| chrUn | 68129290 | 68130001 | 712 CarSat1  | red    | na |
| chrUn | 68130028 | 68132707 | 2680 CarSat1 | red    | na |
| chrUn | 68132723 | 68133692 | 970 CarSat1  | red    | na |
| chrUn | 68133713 | 68135898 | 2186 CarSat1 | red    | na |
| chrUn | 68135919 | 68136898 | 980 CarSat1  | red    | na |
| chrUn | 68136934 | 68139336 | 2403 CarSat1 | red    | na |
| chrUn | 68139353 | 68139846 | 494 CarSat1  | red    | na |
| chrUn | 68139876 | 68140516 | 641 CarSat1  | red    | na |
| chrUn | 68141531 | 68143391 | 1861 CarSat1 | red    | na |
| chrUn | 68143421 | 68143858 | 438 CarSat1  | red    | na |

|       |          |          |      |         |        |    |
|-------|----------|----------|------|---------|--------|----|
| chrUn | 68143885 | 68145090 | 1206 | CarSat1 | red    | na |
| chrUn | 68145106 | 68146600 | 1495 | CarSat1 | red    | na |
| chrUn | 68147983 | 68149422 | 1440 | CarSat1 | red    | na |
| chrUn | 68149447 | 68149941 | 495  | CarSat1 | red    | na |
| chrUn | 68149971 | 68150907 | 937  | CarSat1 | red    | na |
| chrUn | 68150923 | 68152905 | 1983 | CarSat1 | red    | na |
| chrUn | 68152920 | 68154380 | 1461 | CarSat1 | red    | na |
| chrUn | 68154396 | 68155503 | 1108 | CarSat1 | red    | na |
| chrUn | 68156628 | 68157850 | 1223 | CarSat1 | red    | na |
| chrUn | 68157866 | 68158842 | 977  | CarSat1 | red    | na |
| chrUn | 68159776 | 68161309 | 1534 | CarSat1 | red    | na |
| chrUn | 68161966 | 68162771 | 806  | CarSat1 | red    | na |
| chrUn | 68162792 | 68163700 | 909  | CarSat1 | red    | na |
| chrUn | 68169310 | 68173001 | 3692 | CarSat1 | red    | na |
| chrUn | 68173031 | 68176380 | 3350 | CarSat1 | red    | na |
| chrUn | 68220046 | 68221125 | 1080 | CarSat1 | red    | na |
| chrUn | 68221143 | 68223112 | 1970 | CarSat1 | red    | na |
| chrUn | 68223114 | 68224197 | 1084 | SAT1_CF | blue   | na |
| chrUn | 68224209 | 68224820 | 612  | SAT1_CF | blue   | na |
| chrUn | 68224864 | 68225469 | 606  | SAT1_CF | blue   | na |
| chrUn | 68226477 | 68227376 | 900  | CarSat1 | red    | na |
| chrUn | 68227409 | 68228364 | 956  | CarSat1 | red    | na |
| chrUn | 68228391 | 68228851 | 461  | CarSat1 | red    | na |
| chrUn | 68228884 | 68229369 | 486  | CarSat1 | red    | na |
| chrUn | 68229399 | 68230121 | 723  | CarSat1 | red    | na |
| chrUn | 68230136 | 68231060 | 925  | CarSat1 | red    | na |
| chrUn | 68231093 | 68231594 | 502  | CarSat1 | red    | na |
| chrUn | 68231608 | 68232335 | 728  | CarSat1 | red    | na |
| chrUn | 68232349 | 68233060 | 712  | CarSat1 | red    | na |
| chrUn | 68233090 | 68234019 | 930  | CarSat1 | red    | na |
| chrUn | 68234053 | 68235295 | 1243 | CarSat1 | red    | na |
| chrUn | 68235310 | 68236032 | 723  | CarSat1 | red    | na |
| chrUn | 68236047 | 68236976 | 930  | CarSat1 | red    | na |
| chrUn | 68237009 | 68239104 | 2096 | CarSat1 | red    | na |
| chrUn | 68244524 | 68245304 | 781  | Sat2CF  | purple | na |
| chrUn | 68244553 | 68245230 | 678  | Sat2CF  | purple | na |
| chrUn | 68267364 | 68267939 | 576  | CarSat1 | red    | na |
| chrUn | 68267954 | 68268080 | 127  | Carsat2 | orange | na |
| chrUn | 68267969 | 68269413 | 1445 | CarSat1 | red    | na |
| chrUn | 68269428 | 68269553 | 126  | Carsat2 | orange | na |
| chrUn | 68269443 | 68270147 | 705  | CarSat1 | red    | na |
| chrUn | 68270162 | 68270288 | 127  | Carsat2 | orange | na |

|       |          |          |      |         |        |    |
|-------|----------|----------|------|---------|--------|----|
| chrUn | 68270177 | 68270662 | 486  | CarSat1 | red    | na |
| chrUn | 68270695 | 68271625 | 931  | CarSat1 | red    | na |
| chrUn | 68271640 | 68271766 | 127  | Carsat2 | orange | na |
| chrUn | 68271655 | 68272362 | 708  | CarSat1 | red    | na |
| chrUn | 68272377 | 68272503 | 127  | Carsat2 | orange | na |
| chrUn | 68272392 | 68273614 | 1223 | CarSat1 | red    | na |
| chrUn | 68273648 | 68274572 | 925  | CarSat1 | red    | na |
| chrUn | 68274587 | 68274713 | 127  | Carsat2 | orange | na |
| chrUn | 68274602 | 68275824 | 1223 | CarSat1 | red    | na |
| chrUn | 68275857 | 68276783 | 927  | CarSat1 | red    | na |
| chrUn | 68276798 | 68276924 | 127  | Carsat2 | orange | na |
| chrUn | 68276813 | 68279938 | 3126 | CarSat1 | red    | na |
| chrUn | 68280977 | 68282437 | 1461 | CarSat1 | red    | na |
| chrUn | 68282462 | 68283413 | 952  | CarSat1 | red    | na |
| chrUn | 68283440 | 68285154 | 1715 | CarSat1 | red    | na |
| chrUn | 68285191 | 68286119 | 929  | CarSat1 | red    | na |
| chrUn | 68286144 | 68286846 | 703  | CarSat1 | red    | na |
| chrUn | 68286871 | 68288320 | 1450 | CarSat1 | red    | na |
| chrUn | 68288345 | 68289137 | 793  | CarSat1 | red    | na |
| chrUn | 68289839 | 68290645 | 807  | CarSat1 | red    | na |
| chrUn | 68290666 | 68291857 | 1192 | CarSat1 | red    | na |
| chrUn | 68291882 | 68294200 | 2319 | CarSat1 | red    | na |
| chrUn | 68308779 | 68311292 | 2514 | CarSat1 | red    | na |
| chrUn | 68311325 | 68313289 | 1965 | CarSat1 | red    | na |
| chrUn | 68313319 | 68313898 | 580  | CarSat1 | red    | na |
| chrUn | 68314826 | 68315511 | 686  | CarSat1 | red    | na |
| chrUn | 68315533 | 68319780 | 4248 | CarSat1 | red    | na |
| chrUn | 68319807 | 68320516 | 710  | CarSat1 | red    | na |
| chrUn | 68320543 | 68322219 | 1677 | CarSat1 | red    | na |
| chrUn | 68323237 | 68325289 | 2053 | CarSat1 | red    | na |
| chrUn | 68325323 | 68326249 | 927  | CarSat1 | red    | na |
| chrUn | 68326264 | 68326390 | 127  | Carsat2 | orange | na |
| chrUn | 68326279 | 68327722 | 1444 | CarSat1 | red    | na |
| chrUn | 68327753 | 68335775 | 8023 | CarSat1 | red    | na |
| chrUn | 68342170 | 68344019 | 1850 | Sat40CF | na     | na |
| chrUn | 68342800 | 68345090 | 2291 | Sat40CF | na     | na |
| chrUn | 68343850 | 68345311 | 1462 | Sat40CF | na     | na |
| chrUn | 68345361 | 68345589 | 229  | Sat40CF | na     | na |
| chrUn | 68345420 | 68347668 | 2249 | Sat40CF | na     | na |
| chrUn | 68346449 | 68348718 | 2270 | Sat40CF | na     | na |
| chrUn | 68347499 | 68349080 | 1582 | Sat40CF | na     | na |
| chrUn | 68350148 | 68351457 | 1310 | Sat40CF | na     | na |

|       |          |          |      |         |       |    |
|-------|----------|----------|------|---------|-------|----|
| chrUn | 68360432 | 68360971 | 540  | CarSat1 | red   | na |
| chrUn | 68360998 | 68363181 | 2184 | CarSat1 | red   | na |
| chrUn | 68363208 | 68365395 | 2188 | CarSat1 | red   | na |
| chrUn | 68365422 | 68366132 | 711  | CarSat1 | red   | na |
| chrUn | 68366159 | 68367121 | 963  | CarSat1 | red   | na |
| chrUn | 68367137 | 68368343 | 1207 | CarSat1 | red   | na |
| chrUn | 68368370 | 68369333 | 964  | CarSat1 | red   | na |
| chrUn | 68369358 | 68371543 | 2186 | CarSat1 | red   | na |
| chrUn | 68371582 | 68372921 | 1340 | CarSat1 | red   | na |
| chrUn | 68429592 | 68431102 | 1511 | CarSat1 | red   | na |
| chrUn | 68431129 | 68431838 | 710  | CarSat1 | red   | na |
| chrUn | 68431867 | 68432578 | 712  | CarSat1 | red   | na |
| chrUn | 68432605 | 68433074 | 470  | CarSat1 | red   | na |
| chrUn | 68433099 | 68435058 | 1960 | CarSat1 | red   | na |
| chrUn | 68435097 | 68436261 | 1165 | CarSat1 | red   | na |
| chrUn | 68436288 | 68436997 | 710  | CarSat1 | red   | na |
| chrUn | 68437024 | 68437740 | 717  | CarSat1 | red   | na |
| chrUn | 68437762 | 68438741 | 980  | CarSat1 | red   | na |
| chrUn | 68438771 | 68441921 | 3151 | CarSat1 | red   | na |
| chrUn | 68442964 | 68445286 | 2323 | CarSat1 | red   | na |
| chrUn | 68445302 | 68446009 | 708  | CarSat1 | red   | na |
| chrUn | 68446039 | 68447710 | 1672 | CarSat1 | red   | na |
| chrUn | 68447726 | 68448220 | 495  | CarSat1 | red   | na |
| chrUn | 68448250 | 68448958 | 709  | CarSat1 | red   | na |
| chrUn | 68448988 | 68449696 | 709  | CarSat1 | red   | na |
| chrUn | 68449726 | 68451170 | 1445 | CarSat1 | red   | na |
| chrUn | 68451207 | 68452126 | 920  | CarSat1 | red   | na |
| chrUn | 68452151 | 68453382 | 1232 | CarSat1 | red   | na |
| chrUn | 68453419 | 68455438 | 2020 | CarSat1 | red   | na |
| chrUn | 68485165 | 68486298 | 1134 | CarSat1 | red   | na |
| chrUn | 68486328 | 68487050 | 723  | CarSat1 | red   | na |
| chrUn | 68487065 | 68487772 | 708  | CarSat1 | red   | na |
| chrUn | 68487802 | 68489727 | 1926 | CarSat1 | red   | na |
| chrUn | 68489748 | 68490726 | 979  | CarSat1 | red   | na |
| chrUn | 68490756 | 68493689 | 2934 | CarSat1 | red   | na |
| chrUn | 68493704 | 68495154 | 1451 | CarSat1 | red   | na |
| chrUn | 68495191 | 68496364 | 1174 | CarSat1 | red   | na |
| chrUn | 68496391 | 68497643 | 1253 | CarSat1 | red   | na |
| chrUn | 68509134 | 68509317 | 184  | Carsat3 | green | na |
| chrUn | 68509588 | 68509682 | 95   | Carsat3 | green | na |
| chrUn | 68509725 | 68511324 | 1600 | Carsat3 | green | na |
| chrUn | 68511446 | 68511572 | 127  | Carsat3 | green | na |

|       |          |          |      |         |        |    |
|-------|----------|----------|------|---------|--------|----|
| chrUn | 68567736 | 68568799 | 1064 | CarSat1 | red    | na |
| chrUn | 68568962 | 68569671 | 710  | CarSat1 | red    | na |
| chrUn | 68569698 | 68570407 | 710  | CarSat1 | red    | na |
| chrUn | 68570434 | 68572495 | 2062 | CarSat1 | red    | na |
| chrUn | 68575276 | 68575889 | 614  | CarSat1 | red    | na |
| chrUn | 68575916 | 68576626 | 711  | CarSat1 | red    | na |
| chrUn | 68576653 | 68577607 | 955  | CarSat1 | red    | na |
| chrUn | 68577632 | 68579079 | 1448 | CarSat1 | red    | na |
| chrUn | 68579103 | 68580034 | 932  | CarSat1 | red    | na |
| chrUn | 68580049 | 68580175 | 127  | Carsat2 | orange | na |
| chrUn | 68580064 | 68580533 | 470  | CarSat1 | red    | na |
| chrUn | 68580566 | 68582881 | 2316 | CarSat1 | red    | na |
| chrUn | 68605260 | 68606316 | 1057 | CarSat1 | red    | na |
| chrUn | 68606341 | 68607293 | 953  | CarSat1 | red    | na |
| chrUn | 68607320 | 68607788 | 469  | CarSat1 | red    | na |
| chrUn | 68607813 | 68608766 | 954  | CarSat1 | red    | na |
| chrUn | 68608793 | 68610588 | 1796 | CarSat1 | red    | na |
| chrUn | 68611430 | 68612876 | 1447 | CarSat1 | red    | na |
| chrUn | 68612903 | 68615086 | 2184 | CarSat1 | red    | na |
| chrUn | 68615113 | 68615823 | 711  | CarSat1 | red    | na |
| chrUn | 68615850 | 68618481 | 2632 | CarSat1 | red    | na |
| chrUn | 68634331 | 68635207 | 877  | CarSat1 | red    | na |
| chrUn | 68635222 | 68635349 | 128  | Carsat2 | orange | na |
| chrUn | 68635237 | 68635940 | 704  | CarSat1 | red    | na |
| chrUn | 68635962 | 68636089 | 128  | Carsat2 | orange | na |
| chrUn | 68635977 | 68636682 | 706  | CarSat1 | red    | na |
| chrUn | 68636712 | 68637419 | 708  | CarSat1 | red    | na |
| chrUn | 68637434 | 68637561 | 128  | Carsat2 | orange | na |
| chrUn | 68637449 | 68638157 | 709  | CarSat1 | red    | na |
| chrUn | 68638172 | 68638299 | 128  | Carsat2 | orange | na |
| chrUn | 68638187 | 68641375 | 3189 | CarSat1 | red    | na |
| chrUn | 68641396 | 68641841 | 446  | CarSat1 | red    | na |
| chrUn | 68641871 | 68643315 | 1445 | CarSat1 | red    | na |
| chrUn | 68643345 | 68644053 | 709  | CarSat1 | red    | na |
| chrUn | 68644083 | 68644791 | 709  | CarSat1 | red    | na |
| chrUn | 68644806 | 68644933 | 128  | Carsat2 | orange | na |
| chrUn | 68644821 | 68646696 | 1876 | CarSat1 | red    | na |
| chrUn | 68647697 | 68649283 | 1587 | CarSat1 | red    | na |
| chrUn | 68649313 | 68650291 | 979  | CarSat1 | red    | na |
| chrUn | 68650312 | 68652225 | 1914 | CarSat1 | red    | na |
| chrUn | 68652255 | 68653486 | 1232 | CarSat1 | red    | na |
| chrUn | 68653502 | 68654960 | 1459 | CarSat1 | red    | na |

|       |          |          |      |         |     |    |
|-------|----------|----------|------|---------|-----|----|
| chrUn | 68654976 | 68655445 | 470  | CarSat1 | red | na |
| chrUn | 68655472 | 68657909 | 2438 | CarSat1 | red | na |
| chrUn | 68657925 | 68659383 | 1459 | CarSat1 | red | na |
| chrUn | 68659399 | 68660038 | 640  | CarSat1 | red | na |
| chrUn | 68661064 | 68662158 | 1095 | CarSat1 | red | na |
| chrUn | 68662188 | 68664633 | 2446 | CarSat1 | red | na |
| chrUn | 68664670 | 68665715 | 1046 | CarSat1 | red | na |
| chrUn | 68665729 | 68666780 | 1052 | CarSat1 | red | na |
| chrUn | 68666796 | 68667517 | 722  | CarSat1 | red | na |
| chrUn | 68667533 | 68668243 | 711  | CarSat1 | red | na |
| chrUn | 68668268 | 68668761 | 494  | CarSat1 | red | na |
| chrUn | 68668798 | 68669726 | 929  | CarSat1 | red | na |
| chrUn | 68669742 | 68671438 | 1697 | CarSat1 | red | na |
| chrUn | 68671466 | 68672177 | 712  | CarSat1 | red | na |
| chrUn | 68672204 | 68673373 | 1170 | CarSat1 | red | na |
| chrUn | 68687692 | 68688414 | 723  | CarSat1 | red | na |
| chrUn | 68688439 | 68689150 | 712  | CarSat1 | red | na |
| chrUn | 68689175 | 68690159 | 985  | CarSat1 | red | na |
| chrUn | 68690209 | 68691491 | 1283 | CarSat1 | red | na |
| chrUn | 68691516 | 68693704 | 2189 | CarSat1 | red | na |
| chrUn | 68693729 | 68694450 | 722  | CarSat1 | red | na |
| chrUn | 68694475 | 68695176 | 702  | CarSat1 | red | na |
| chrUn | 68695203 | 68697390 | 2188 | CarSat1 | red | na |
| chrUn | 68697415 | 68698137 | 723  | CarSat1 | red | na |
| chrUn | 68698162 | 68698864 | 703  | CarSat1 | red | na |
| chrUn | 68698889 | 68699981 | 1093 | CarSat1 | red | na |
| chrUn | 68700990 | 68702087 | 1098 | CarSat1 | red | na |
| chrUn | 68702112 | 68702815 | 704  | CarSat1 | red | na |
| chrUn | 68702840 | 68704289 | 1450 | CarSat1 | red | na |
| chrUn | 68704314 | 68704783 | 470  | CarSat1 | red | na |
| chrUn | 68704804 | 68705764 | 961  | CarSat1 | red | na |
| chrUn | 68705789 | 68706425 | 637  | CarSat1 | red | na |
| chrUn | 68707328 | 68708098 | 771  | CarSat1 | red | na |
| chrUn | 68708123 | 68709781 | 1659 | CarSat1 | red | na |
| chrUn | 68709818 | 68710797 | 980  | CarSat1 | red | na |
| chrUn | 68710818 | 68711777 | 960  | CarSat1 | red | na |
| chrUn | 68711802 | 68712268 | 467  | CarSat1 | red | na |
| chrUn | 68712289 | 68714118 | 1830 | CarSat1 | red | na |
| chrUn | 68729815 | 68730436 | 622  | CarSat1 | red | na |
| chrUn | 68730473 | 68731392 | 920  | CarSat1 | red | na |
| chrUn | 68731417 | 68732122 | 706  | CarSat1 | red | na |
| chrUn | 68732155 | 68733124 | 970  | CarSat1 | red | na |

|       |          |          |      |         |        |    |
|-------|----------|----------|------|---------|--------|----|
| chrUn | 68733145 | 68734355 | 1211 | CarSat1 | red    | na |
| chrUn | 68734375 | 68735086 | 712  | CarSat1 | red    | na |
| chrUn | 68735111 | 68736069 | 959  | CarSat1 | red    | na |
| chrUn | 68736090 | 68739010 | 2921 | CarSat1 | red    | na |
| chrUn | 68739031 | 68739500 | 470  | CarSat1 | red    | na |
| chrUn | 68739525 | 68740482 | 958  | CarSat1 | red    | na |
| chrUn | 68740503 | 68740962 | 460  | CarSat1 | red    | na |
| chrUn | 68740987 | 68742085 | 1099 | CarSat1 | red    | na |
| chrUn | 68743109 | 68744414 | 1306 | CarSat1 | red    | na |
| chrUn | 68744454 | 68745433 | 980  | CarSat1 | red    | na |
| chrUn | 68745454 | 68746171 | 718  | CarSat1 | red    | na |
| chrUn | 68746198 | 68747161 | 964  | CarSat1 | red    | na |
| chrUn | 68747186 | 68747899 | 714  | CarSat1 | red    | na |
| chrUn | 68747924 | 68748386 | 463  | CarSat1 | red    | na |
| chrUn | 68748411 | 68749121 | 711  | CarSat1 | red    | na |
| chrUn | 68749148 | 68749776 | 629  | CarSat1 | red    | na |
| chrUn | 68752271 | 68752981 | 711  | CarSat1 | red    | na |
| chrUn | 68753008 | 68754453 | 1446 | CarSat1 | red    | na |
| chrUn | 68754480 | 68755189 | 710  | CarSat1 | red    | na |
| chrUn | 68755216 | 68755926 | 711  | CarSat1 | red    | na |
| chrUn | 68755954 | 68757800 | 1847 | CarSat1 | red    | na |
| chrUn | 68765396 | 68766098 | 703  | CarSat1 | red    | na |
| chrUn | 68766125 | 68768088 | 1964 | CarSat1 | red    | na |
| chrUn | 68768090 | 68769246 | 1157 | SAT1_CF | blue   | na |
| chrUn | 68769289 | 68771001 | 1713 | SAT1_CF | blue   | na |
| chrUn | 68785255 | 68786605 | 1351 | CarSat1 | red    | na |
| chrUn | 68786632 | 68787343 | 712  | CarSat1 | red    | na |
| chrUn | 68787370 | 68788577 | 1208 | CarSat1 | red    | na |
| chrUn | 68788593 | 68789820 | 1228 | CarSat1 | red    | na |
| chrUn | 68789863 | 68790551 | 689  | CarSat1 | red    | na |
| chrUn | 68790581 | 68791288 | 708  | CarSat1 | red    | na |
| chrUn | 68791318 | 68792761 | 1444 | CarSat1 | red    | na |
| chrUn | 68792791 | 68793499 | 709  | CarSat1 | red    | na |
| chrUn | 68793529 | 68794234 | 706  | CarSat1 | red    | na |
| chrUn | 68794264 | 68794971 | 708  | CarSat1 | red    | na |
| chrUn | 68795001 | 68796922 | 1922 | CarSat1 | red    | na |
| chrUn | 68796969 | 68797476 | 508  | CarSat1 | red    | na |
| chrUn | 68869163 | 68869996 | 834  | CarSat1 | red    | na |
| chrUn | 68870035 | 68870743 | 709  | CarSat1 | red    | na |
| chrUn | 68870773 | 68872256 | 1484 | CarSat1 | red    | na |
| chrUn | 68872286 | 68874474 | 2189 | CarSat1 | red    | na |
| chrUn | 68874489 | 68874616 | 128  | Carsat2 | orange | na |

|       |          |          |      |         |        |    |
|-------|----------|----------|------|---------|--------|----|
| chrUn | 68874504 | 68876563 | 2060 | CarSat1 | red    | na |
| chrUn | 68876748 | 68877401 | 654  | CarSat1 | red    | na |
| chrUn | 68877425 | 68878142 | 718  | CarSat1 | red    | na |
| chrUn | 68878166 | 68879106 | 941  | CarSat1 | red    | na |
| chrUn | 68879121 | 68879247 | 127  | Carsat2 | orange | na |
| chrUn | 68879136 | 68879621 | 486  | CarSat1 | red    | na |
| chrUn | 68879645 | 68880362 | 718  | CarSat1 | red    | na |
| chrUn | 68880386 | 68881247 | 862  | CarSat1 | red    | na |
| chrUn | 68882315 | 68883267 | 953  | CarSat1 | red    | na |
| chrUn | 68883292 | 68884500 | 1209 | CarSat1 | red    | na |
| chrUn | 68884524 | 68885010 | 487  | CarSat1 | red    | na |
| chrUn | 68885040 | 68885747 | 708  | CarSat1 | red    | na |
| chrUn | 68885784 | 68886701 | 918  | CarSat1 | red    | na |
| chrUn | 68886727 | 68887689 | 963  | CarSat1 | red    | na |
| chrUn | 68887716 | 68889899 | 2184 | CarSat1 | red    | na |
| chrUn | 68889926 | 68892111 | 2186 | CarSat1 | red    | na |
| chrUn | 68892136 | 68894322 | 2187 | CarSat1 | red    | na |
| chrUn | 68895464 | 68897833 | 2370 | CarSat1 | red    | na |
| chrUn | 68897867 | 68899560 | 1694 | CarSat1 | red    | na |
| chrUn | 68899581 | 68900558 | 978  | CarSat1 | red    | na |
| chrUn | 68900588 | 68901289 | 702  | CarSat1 | red    | na |
| chrUn | 68901329 | 68907605 | 6277 | CarSat1 | red    | na |
| chrUn | 68908610 | 68909238 | 629  | CarSat1 | red    | na |
| chrUn | 68909265 | 68909975 | 711  | CarSat1 | red    | na |
| chrUn | 68910002 | 68910713 | 712  | CarSat1 | red    | na |
| chrUn | 68910740 | 68911450 | 711  | CarSat1 | red    | na |
| chrUn | 68911477 | 68912188 | 712  | CarSat1 | red    | na |
| chrUn | 68912215 | 68913162 | 948  | CarSat1 | red    | na |
| chrUn | 68913189 | 68913658 | 470  | CarSat1 | red    | na |
| chrUn | 68913685 | 68914396 | 712  | CarSat1 | red    | na |
| chrUn | 68914423 | 68915134 | 712  | CarSat1 | red    | na |
| chrUn | 68915161 | 68916122 | 962  | CarSat1 | red    | na |
| chrUn | 68916138 | 68917597 | 1460 | CarSat1 | red    | na |
| chrUn | 68917622 | 68919701 | 2080 | CarSat1 | red    | na |
| chrUn | 68919726 | 68920738 | 1013 | CarSat1 | red    | na |
| chrUn | 68921778 | 68923010 | 1233 | CarSat1 | red    | na |
| chrUn | 68923040 | 68923747 | 708  | CarSat1 | red    | na |
| chrUn | 68923777 | 68924217 | 441  | CarSat1 | red    | na |
| chrUn | 68924244 | 68924954 | 711  | CarSat1 | red    | na |
| chrUn | 68924981 | 68925450 | 470  | CarSat1 | red    | na |
| chrUn | 68925466 | 68927518 | 2053 | CarSat1 | red    | na |
| chrUn | 68927623 | 68928014 | 392  | CarSat1 | red    | na |



|       |          |          |      |         |        |    |
|-------|----------|----------|------|---------|--------|----|
| chrUn | 68928056 | 68928781 | 726  | CarSat1 | red    | na |
| chrUn | 68928808 | 68930257 | 1450 | CarSat1 | red    | na |
| chrUn | 68930284 | 68932740 | 2457 | CarSat1 | red    | na |
| chrUn | 68932767 | 68933848 | 1082 | CarSat1 | red    | na |
| chrUn | 68934905 | 68937086 | 2182 | CarSat1 | red    | na |
| chrUn | 68937116 | 68937601 | 486  | CarSat1 | red    | na |
| chrUn | 68937633 | 68941279 | 3647 | CarSat1 | red    | na |
| chrUn | 68941303 | 68942015 | 713  | CarSat1 | red    | na |
| chrUn | 68942039 | 68943491 | 1453 | CarSat1 | red    | na |
| chrUn | 68943515 | 68945923 | 2409 | CarSat1 | red    | na |
| chrUn | 68945953 | 68946864 | 912  | CarSat1 | red    | na |
| chrUn | 68948018 | 68948637 | 620  | CarSat1 | red    | na |
| chrUn | 68948664 | 68949375 | 712  | CarSat1 | red    | na |
| chrUn | 68949402 | 68950354 | 953  | CarSat1 | red    | na |
| chrUn | 68950380 | 68951587 | 1208 | CarSat1 | red    | na |
| chrUn | 68951614 | 68953063 | 1450 | CarSat1 | red    | na |
| chrUn | 68953090 | 68955994 | 2905 | CarSat1 | red    | na |
| chrUn | 68956040 | 68956745 | 706  | CarSat1 | red    | na |
| chrUn | 68956772 | 68957483 | 712  | CarSat1 | red    | na |
| chrUn | 68957509 | 68958282 | 774  | CarSat1 | red    | na |
| chrUn | 68958496 | 68959044 | 549  | CarSat1 | red    | na |
| chrUn | 68959071 | 68960142 | 1072 | CarSat1 | red    | na |
| chrUn | 68961166 | 68961885 | 720  | CarSat1 | red    | na |
| chrUn | 68961901 | 68963106 | 1206 | CarSat1 | red    | na |
| chrUn | 68963133 | 68964310 | 1178 | CarSat1 | red    | na |
| chrUn | 68964325 | 68964452 | 128  | Carsat2 | orange | na |
| chrUn | 68964340 | 68967536 | 3197 | CarSat1 | red    | na |
| chrUn | 68967563 | 68968526 | 964  | CarSat1 | red    | na |
| chrUn | 68968542 | 68969011 | 470  | CarSat1 | red    | na |
| chrUn | 68969038 | 68970001 | 964  | CarSat1 | red    | na |
| chrUn | 68970017 | 68970739 | 723  | CarSat1 | red    | na |
| chrUn | 68970764 | 68971960 | 1197 | CarSat1 | red    | na |
| chrUn | 68971987 | 68973256 | 1270 | CarSat1 | red    | na |
| chrUn | 68979440 | 68980393 | 954  | Sat2CF  | purple | na |
| chrUn | 68979520 | 68980258 | 739  | Sat2CF  | purple | na |
| chrUn | 69003394 | 69003770 | 377  | SAT1_CF | blue   | na |
| chrUn | 69003855 | 69003991 | 137  | SAT1_CF | blue   | na |
| chrUn | 69004019 | 69004531 | 513  | SAT1_CF | blue   | na |
| chrUn | 69004574 | 69005133 | 560  | SAT1_CF | blue   | na |
| chrUn | 69005177 | 69005719 | 543  | SAT1_CF | blue   | na |
| chrUn | 69005816 | 69006491 | 676  | SAT1_CF | blue   | na |
| chrUn | 69006503 | 69007264 | 762  | SAT1_CF | blue   | na |

|       |          |          |              |        |    |
|-------|----------|----------|--------------|--------|----|
| chrUn | 69007284 | 69007753 | 470 SAT1_CF  | blue   | na |
| chrUn | 69007782 | 69008078 | 297 SAT1_CF  | blue   | na |
| chrUn | 69008260 | 69008425 | 166 SAT1_CF  | blue   | na |
| chrUn | 69008464 | 69010274 | 1811 SAT1_CF | blue   | na |
| chrUn | 69010286 | 69010938 | 653 SAT1_CF  | blue   | na |
| chrUn | 69010983 | 69011482 | 500 SAT1_CF  | blue   | na |
| chrUn | 69011522 | 69013375 | 1854 SAT1_CF | blue   | na |
| chrUn | 69013417 | 69014392 | 976 SAT1_CF  | blue   | na |
| chrUn | 69014471 | 69015172 | 702 SAT1_CF  | blue   | na |
| chrUn | 69015195 | 69015495 | 301 SAT1_CF  | blue   | na |
| chrUn | 69016534 | 69017604 | 1071 CarSat1 | red    | na |
| chrUn | 69020009 | 69021336 | 1328 CarSat1 | red    | na |
| chrUn | 69023219 | 69026569 | 3351 CarSat1 | red    | na |
| chrUn | 69027416 | 69029529 | 2114 CarSat1 | red    | na |
| chrUn | 69031094 | 69032115 | 1022 CarSat1 | red    | na |
| chrUn | 69033380 | 69036486 | 3107 CarSat1 | red    | na |
| chrUn | 69047816 | 69048637 | 822 CarSat1  | red    | na |
| chrUn | 69048989 | 69049417 | 429 CarSat1  | red    | na |
| chrUn | 69049438 | 69051031 | 1594 CarSat1 | red    | na |
| chrUn | 69051052 | 69052642 | 1591 CarSat1 | red    | na |
| chrUn | 69052663 | 69053569 | 907 CarSat1  | red    | na |
| chrUn | 69053634 | 69054416 | 783 CarSat1  | red    | na |
| chrUn | 69054437 | 69055081 | 645 CarSat1  | red    | na |
| chrUn | 69056093 | 69058223 | 2131 CarSat1 | red    | na |
| chrUn | 69058250 | 69059427 | 1178 CarSat1 | red    | na |
| chrUn | 69059442 | 69059569 | 128 Carsat2  | orange | na |
| chrUn | 69059463 | 69062890 | 3428 CarSat1 | red    | na |
| chrUn | 69062915 | 69065102 | 2188 CarSat1 | red    | na |
| chrUn | 69065126 | 69066332 | 1207 CarSat1 | red    | na |
| chrUn | 69066353 | 69068051 | 1699 CarSat1 | red    | na |
| chrUn | 69089536 | 69089955 | 420 SAT1_CF  | blue   | na |
| chrUn | 69112938 | 69113667 | 730 CarSat1  | red    | na |
| chrUn | 69113696 | 69114626 | 931 CarSat1  | red    | na |
| chrUn | 69114656 | 69115363 | 708 CarSat1  | red    | na |
| chrUn | 69115393 | 69116099 | 707 CarSat1  | red    | na |
| chrUn | 69116129 | 69116833 | 705 CarSat1  | red    | na |
| chrUn | 69116863 | 69117569 | 707 CarSat1  | red    | na |
| chrUn | 69117584 | 69117710 | 127 Carsat2  | orange | na |
| chrUn | 69117599 | 69118306 | 708 CarSat1  | red    | na |
| chrUn | 69118321 | 69118447 | 127 Carsat2  | orange | na |
| chrUn | 69118336 | 69119047 | 712 CarSat1  | red    | na |
| chrUn | 69119062 | 69119189 | 128 Carsat2  | orange | na |

|       |          |          |      |         |        |    |
|-------|----------|----------|------|---------|--------|----|
| chrUn | 69119077 | 69119785 | 709  | CarSat1 | red    | na |
| chrUn | 69119801 | 69119927 | 127  | Carsat2 | orange | na |
| chrUn | 69119815 | 69120521 | 707  | CarSat1 | red    | na |
| chrUn | 69120537 | 69120663 | 127  | Carsat2 | orange | na |
| chrUn | 69120552 | 69121257 | 706  | CarSat1 | red    | na |
| chrUn | 69121273 | 69121399 | 127  | Carsat2 | orange | na |
| chrUn | 69121288 | 69121998 | 711  | CarSat1 | red    | na |
| chrUn | 69122013 | 69122139 | 127  | Carsat2 | orange | na |
| chrUn | 69122028 | 69122735 | 708  | CarSat1 | red    | na |
| chrUn | 69122750 | 69122876 | 127  | Carsat2 | orange | na |
| chrUn | 69122766 | 69123473 | 708  | CarSat1 | red    | na |
| chrUn | 69123488 | 69123614 | 127  | Carsat2 | orange | na |
| chrUn | 69123503 | 69124210 | 708  | CarSat1 | red    | na |
| chrUn | 69124240 | 69124997 | 758  | CarSat1 | red    | na |
| chrUn | 69133972 | 69134687 | 716  | Sat2CF  | purple | na |
| chrUn | 69147271 | 69148147 | 877  | CarSat1 | red    | na |
| chrUn | 69148174 | 69149625 | 1452 | CarSat1 | red    | na |
| chrUn | 69149652 | 69152574 | 2923 | CarSat1 | red    | na |
| chrUn | 69152601 | 69156754 | 4154 | CarSat1 | red    | na |
| chrUn | 69156779 | 69157489 | 711  | CarSat1 | red    | na |
| chrUn | 69157514 | 69158467 | 954  | CarSat1 | red    | na |
| chrUn | 69158494 | 69159322 | 829  | CarSat1 | red    | na |
| chrUn | 69173375 | 69173944 | 570  | CarSat1 | red    | na |
| chrUn | 69173974 | 69174684 | 711  | CarSat1 | red    | na |
| chrUn | 69174699 | 69174826 | 128  | Carsat2 | orange | na |
| chrUn | 69174714 | 69175422 | 709  | CarSat1 | red    | na |
| chrUn | 69175437 | 69175563 | 127  | Carsat2 | orange | na |
| chrUn | 69175452 | 69176897 | 1446 | CarSat1 | red    | na |
| chrUn | 69176912 | 69177039 | 128  | Carsat2 | orange | na |
| chrUn | 69176927 | 69177634 | 708  | CarSat1 | red    | na |
| chrUn | 69177649 | 69177776 | 128  | Carsat2 | orange | na |
| chrUn | 69177664 | 69178150 | 487  | CarSat1 | red    | na |
| chrUn | 69178183 | 69179849 | 1667 | CarSat1 | red    | na |
| chrUn | 69179864 | 69179990 | 127  | Carsat2 | orange | na |
| chrUn | 69179879 | 69181328 | 1450 | CarSat1 | red    | na |
| chrUn | 69181358 | 69182064 | 707  | CarSat1 | red    | na |
| chrUn | 69182094 | 69183537 | 1444 | CarSat1 | red    | na |
| chrUn | 69183567 | 69185423 | 1857 | CarSat1 | red    | na |
| chrUn | 69202277 | 69203221 | 945  | CarSat1 | red    | na |
| chrUn | 69203242 | 69203958 | 717  | CarSat1 | red    | na |
| chrUn | 69203979 | 69205154 | 1176 | CarSat1 | red    | na |
| chrUn | 69205191 | 69205897 | 707  | CarSat1 | red    | na |

|       |          |          |      |         |        |    |
|-------|----------|----------|------|---------|--------|----|
| chrUn | 69205912 | 69206039 | 128  | Carsat2 | orange | na |
| chrUn | 69205927 | 69206417 | 491  | CarSat1 | red    | na |
| chrUn | 69206431 | 69207153 | 723  | CarSat1 | red    | na |
| chrUn | 69207178 | 69208439 | 1262 | CarSat1 | red    | na |
| chrUn | 69208460 | 69209361 | 902  | CarSat1 | red    | na |
| chrUn | 69209425 | 69210803 | 1379 | CarSat1 | red    | na |
| chrUn | 69210954 | 69211904 | 951  | CarSat1 | red    | na |
| chrUn | 69216022 | 69216746 | 725  | CarSat1 | red    | na |
| chrUn | 69216777 | 69217692 | 916  | CarSat1 | red    | na |
| chrUn | 69218087 | 69218745 | 659  | CarSat1 | red    | na |
| chrUn | 69218776 | 69220149 | 1374 | CarSat1 | red    | na |
| chrUn | 69225355 | 69228351 | 2997 | CarSat1 | red    | na |
| chrUn | 69228373 | 69229782 | 1410 | CarSat1 | red    | na |
| chrUn | 69238615 | 69239606 | 992  | CarSat1 | red    | na |
| chrUn | 69251539 | 69254535 | 2997 | CarSat1 | red    | na |
| chrUn | 69254556 | 69255549 | 994  | CarSat1 | red    | na |
| chrUn | 69255568 | 69257004 | 1437 | CarSat1 | red    | na |
| chrUn | 69257035 | 69258492 | 1458 | CarSat1 | red    | na |
| chrUn | 69258507 | 69259228 | 722  | CarSat1 | red    | na |
| chrUn | 69259243 | 69261428 | 2186 | CarSat1 | red    | na |
| chrUn | 69261465 | 69263507 | 2043 | CarSat1 | red    | na |
| chrUn | 69264514 | 69265065 | 552  | CarSat1 | red    | na |
| chrUn | 69265080 | 69265790 | 711  | CarSat1 | red    | na |
| chrUn | 69265820 | 69266542 | 723  | CarSat1 | red    | na |
| chrUn | 69266557 | 69267279 | 723  | CarSat1 | red    | na |
| chrUn | 69267294 | 69267999 | 706  | CarSat1 | red    | na |
| chrUn | 69268025 | 69268192 | 168  | CarSat1 | red    | na |
| chrUn | 69268378 | 69269692 | 1315 | CarSat1 | red    | na |
| chrUn | 69269707 | 69272848 | 3142 | CarSat1 | red    | na |
| chrUn | 69272881 | 69273585 | 705  | CarSat1 | red    | na |
| chrUn | 69273618 | 69274853 | 1236 | CarSat1 | red    | na |
| chrUn | 69274868 | 69276446 | 1579 | CarSat1 | red    | na |
| chrUn | 69290460 | 69291881 | 1422 | CarSat1 | red    | na |
| chrUn | 69291897 | 69294336 | 2440 | CarSat1 | red    | na |
| chrUn | 69294363 | 69296815 | 2453 | CarSat1 | red    | na |
| chrUn | 69296845 | 69297290 | 446  | CarSat1 | red    | na |
| chrUn | 69297312 | 69298024 | 713  | CarSat1 | red    | na |
| chrUn | 69298051 | 69298519 | 469  | CarSat1 | red    | na |
| chrUn | 69298535 | 69300976 | 2442 | CarSat1 | red    | na |
| chrUn | 69301000 | 69302400 | 1401 | CarSat1 | red    | na |
| chrUn | 69303403 | 69306181 | 2779 | CarSat1 | red    | na |
| chrUn | 69306203 | 69307656 | 1454 | CarSat1 | red    | na |

|       |          |          |      |         |        |    |
|-------|----------|----------|------|---------|--------|----|
| chrUn | 69307671 | 69309852 | 2182 | CarSat1 | red    | na |
| chrUn | 69309882 | 69310605 | 724  | CarSat1 | red    | na |
| chrUn | 69310620 | 69311325 | 706  | CarSat1 | red    | na |
| chrUn | 69311359 | 69312081 | 723  | CarSat1 | red    | na |
| chrUn | 69312096 | 69315321 | 3226 | CarSat1 | red    | na |
| chrUn | 69334853 | 69335622 | 770  | CarSat1 | red    | na |
| chrUn | 69335638 | 69337097 | 1460 | CarSat1 | red    | na |
| chrUn | 69337113 | 69339535 | 2423 | CarSat1 | red    | na |
| chrUn | 69339565 | 69341524 | 1960 | CarSat1 | red    | na |
| chrUn | 69341557 | 69342266 | 710  | CarSat1 | red    | na |
| chrUn | 69342278 | 69343961 | 1684 | CarSat1 | red    | na |
| chrUn | 69343991 | 69345439 | 1449 | CarSat1 | red    | na |
| chrUn | 69345454 | 69345581 | 128  | Carsat2 | orange | na |
| chrUn | 69345469 | 69346743 | 1275 | CarSat1 | red    | na |
| chrUn | 69347745 | 69350822 | 3078 | CarSat1 | red    | na |
| chrUn | 69350855 | 69354731 | 3877 | CarSat1 | red    | na |
| chrUn | 69354761 | 69358690 | 3930 | CarSat1 | red    | na |
| chrUn | 69358712 | 69359637 | 926  | CarSat1 | red    | na |
| chrUn | 69389088 | 69389921 | 834  | CarSat1 | red    | na |
| chrUn | 69389936 | 69391399 | 1464 | CarSat1 | red    | na |
| chrUn | 69391414 | 69392140 | 727  | CarSat1 | red    | na |
| chrUn | 69392155 | 69396050 | 3896 | CarSat1 | red    | na |
| chrUn | 69396083 | 69397326 | 1244 | CarSat1 | red    | na |
| chrUn | 69397341 | 69399546 | 2206 | CarSat1 | red    | na |
| chrUn | 69399561 | 69400287 | 727  | CarSat1 | red    | na |
| chrUn | 69400302 | 69400947 | 646  | CarSat1 | red    | na |
| chrUn | 69431835 | 69432162 | 328  | SAT1_CF | blue   | na |
| chrUn | 69432228 | 69433030 | 803  | SAT1_CF | blue   | na |
| chrUn | 69433969 | 69434860 | 892  | SAT1_CF | blue   | na |
| chrUn | 69434927 | 69438856 | 3930 | SAT1_CF | blue   | na |
| chrUn | 69438876 | 69439550 | 675  | SAT1_CF | blue   | na |
| chrUn | 69439593 | 69440224 | 632  | SAT1_CF | blue   | na |
| chrUn | 69440278 | 69440890 | 613  | SAT1_CF | blue   | na |
| chrUn | 69442950 | 69443415 | 466  | SAT1_CF | blue   | na |
| chrUn | 69443495 | 69444434 | 940  | SAT1_CF | blue   | na |
| chrUn | 69444477 | 69445020 | 544  | SAT1_CF | blue   | na |
| chrUn | 69445042 | 69445138 | 97   | SAT1_CF | blue   | na |
| chrUn | 69445159 | 69445713 | 555  | SAT1_CF | blue   | na |
| chrUn | 69445725 | 69446486 | 762  | SAT1_CF | blue   | na |
| chrUn | 69463868 | 69465356 | 1489 | CarSat1 | red    | na |
| chrUn | 69465386 | 69466095 | 710  | CarSat1 | red    | na |
| chrUn | 69466125 | 69466565 | 441  | CarSat1 | red    | na |

|       |          |          |      |         |        |    |
|-------|----------|----------|------|---------|--------|----|
| chrUn | 69466592 | 69469010 | 2419 | CarSat1 | red    | na |
| chrUn | 69469040 | 69470704 | 1665 | CarSat1 | red    | na |
| chrUn | 69470729 | 69471441 | 713  | CarSat1 | red    | na |
| chrUn | 69471466 | 69472434 | 969  | CarSat1 | red    | na |
| chrUn | 69472455 | 69473432 | 978  | CarSat1 | red    | na |
| chrUn | 69473462 | 69475644 | 2183 | CarSat1 | red    | na |
| chrUn | 69489507 | 69490496 | 990  | CarSat1 | red    | na |
| chrUn | 69490511 | 69490638 | 128  | Carsat2 | orange | na |
| chrUn | 69490526 | 69491009 | 484  | CarSat1 | red    | na |
| chrUn | 69491034 | 69492705 | 1672 | CarSat1 | red    | na |
| chrUn | 69492735 | 69493715 | 981  | CarSat1 | red    | na |
| chrUn | 69493736 | 69497401 | 3666 | CarSat1 | red    | na |
| chrUn | 69497422 | 69499114 | 1693 | CarSat1 | red    | na |
| chrUn | 69499139 | 69501323 | 2185 | CarSat1 | red    | na |
| chrUn | 69534134 | 69534929 | 796  | CarSat1 | red    | na |
| chrUn | 69534945 | 69535930 | 986  | CarSat1 | red    | na |
| chrUn | 69535955 | 69537402 | 1448 | CarSat1 | red    | na |
| chrUn | 69537427 | 69538363 | 937  | CarSat1 | red    | na |
| chrUn | 69538395 | 69540687 | 2293 | CarSat1 | red    | na |
| chrUn | 69541882 | 69542783 | 902  | CarSat1 | red    | na |
| chrUn | 69542813 | 69544035 | 1223 | CarSat1 | red    | na |
| chrUn | 69544060 | 69544771 | 712  | CarSat1 | red    | na |
| chrUn | 69544796 | 69547117 | 2322 | CarSat1 | red    | na |
| chrUn | 69573758 | 69575128 | 1371 | SAT1_CF | blue   | na |
| chrUn | 69575171 | 69575836 | 666  | SAT1_CF | blue   | na |
| chrUn | 69575849 | 69576350 | 502  | SAT1_CF | blue   | na |
| chrUn | 69576386 | 69577661 | 1276 | SAT1_CF | blue   | na |
| chrUn | 69577699 | 69578237 | 539  | SAT1_CF | blue   | na |
| chrUn | 69578279 | 69579129 | 851  | SAT1_CF | blue   | na |
| chrUn | 69579151 | 69580236 | 1086 | SAT1_CF | blue   | na |
| chrUn | 69580278 | 69581127 | 850  | SAT1_CF | blue   | na |
| chrUn | 69581140 | 69582083 | 944  | SAT1_CF | blue   | na |
| chrUn | 69582135 | 69582879 | 745  | SAT1_CF | blue   | na |
| chrUn | 69582923 | 69583924 | 1002 | SAT1_CF | blue   | na |
| chrUn | 69583967 | 69584513 | 547  | SAT1_CF | blue   | na |
| chrUn | 69584543 | 69584785 | 243  | SAT1_CF | blue   | na |
| chrUn | 69584817 | 69585429 | 613  | SAT1_CF | blue   | na |
| chrUn | 69586439 | 69588547 | 2109 | CarSat1 | red    | na |
| chrUn | 69588568 | 69590482 | 1915 | CarSat1 | red    | na |
| chrUn | 69590668 | 69591993 | 1326 | CarSat1 | red    | na |
| chrUn | 69592008 | 69592715 | 708  | CarSat1 | red    | na |
| chrUn | 69592745 | 69593456 | 712  | CarSat1 | red    | na |

|       |          |          |      |         |        |    |
|-------|----------|----------|------|---------|--------|----|
| chrUn | 69593486 | 69594208 | 723  | CarSat1 | red    | na |
| chrUn | 69594223 | 69594949 | 727  | CarSat1 | red    | na |
| chrUn | 69594964 | 69595686 | 723  | CarSat1 | red    | na |
| chrUn | 69595701 | 69596422 | 722  | CarSat1 | red    | na |
| chrUn | 69596437 | 69598175 | 1739 | CarSat1 | red    | na |
| chrUn | 69613106 | 69613761 | 656  | CarSat1 | red    | na |
| chrUn | 69613791 | 69614769 | 979  | CarSat1 | red    | na |
| chrUn | 69614796 | 69615236 | 441  | CarSat1 | red    | na |
| chrUn | 69615266 | 69616245 | 980  | CarSat1 | red    | na |
| chrUn | 69616272 | 69616981 | 710  | CarSat1 | red    | na |
| chrUn | 69617008 | 69618454 | 1447 | CarSat1 | red    | na |
| chrUn | 69618481 | 69618921 | 441  | CarSat1 | red    | na |
| chrUn | 69618951 | 69619659 | 709  | CarSat1 | red    | na |
| chrUn | 69619689 | 69620667 | 979  | CarSat1 | red    | na |
| chrUn | 69620694 | 69622613 | 1920 | CarSat1 | red    | na |
| chrUn | 69622643 | 69623134 | 492  | CarSat1 | red    | na |
| chrUn | 69623159 | 69623619 | 461  | CarSat1 | red    | na |
| chrUn | 69623646 | 69624772 | 1127 | CarSat1 | red    | na |
| chrUn | 69625777 | 69626806 | 1030 | CarSat1 | red    | na |
| chrUn | 69626833 | 69628122 | 1290 | CarSat1 | red    | na |
| chrUn | 69628189 | 69628632 | 444  | CarSat1 | red    | na |
| chrUn | 69628648 | 69629368 | 721  | CarSat1 | red    | na |
| chrUn | 69629384 | 69630356 | 973  | CarSat1 | red    | na |
| chrUn | 69630374 | 69631083 | 710  | CarSat1 | red    | na |
| chrUn | 69631110 | 69631815 | 706  | CarSat1 | red    | na |
| chrUn | 69631842 | 69633560 | 1719 | CarSat1 | red    | na |
| chrUn | 69633590 | 69635993 | 2404 | CarSat1 | red    | na |
| chrUn | 69636026 | 69637122 | 1097 | CarSat1 | red    | na |
| chrUn | 69637175 | 69637512 | 338  | SAT1_CF | blue   | na |
| chrUn | 69638525 | 69640538 | 2014 | CarSat1 | red    | na |
| chrUn | 69640559 | 69641299 | 741  | CarSat1 | red    | na |
| chrUn | 69641320 | 69642058 | 739  | CarSat1 | red    | na |
| chrUn | 69642092 | 69643060 | 969  | CarSat1 | red    | na |
| chrUn | 69643075 | 69644989 | 1915 | CarSat1 | red    | na |
| chrUn | 69645016 | 69645726 | 711  | CarSat1 | red    | na |
| chrUn | 69645753 | 69646464 | 712  | CarSat1 | red    | na |
| chrUn | 69646491 | 69647201 | 711  | CarSat1 | red    | na |
| chrUn | 69647228 | 69650148 | 2921 | CarSat1 | red    | na |
| chrUn | 69663995 | 69665994 | 2000 | CarSat1 | red    | na |
| chrUn | 69666024 | 69668943 | 2920 | CarSat1 | red    | na |
| chrUn | 69668973 | 69671160 | 2188 | CarSat1 | red    | na |
| chrUn | 69671175 | 69671300 | 126  | Carsat2 | orange | na |

|       |          |          |      |         |        |    |
|-------|----------|----------|------|---------|--------|----|
| chrUn | 69671190 | 69673367 | 2178 | CarSat1 | red    | na |
| chrUn | 69673397 | 69674839 | 1443 | CarSat1 | red    | na |
| chrUn | 69674869 | 69675703 | 835  | CarSat1 | red    | na |
| chrUn | 69683685 | 69683808 | 124  | CarSat1 | red    | na |
| chrUn | 69683968 | 69685331 | 1364 | CarSat1 | red    | na |
| chrUn | 69687091 | 69687339 | 249  | CarSat1 | red    | na |
| chrUn | 69687493 | 69687891 | 399  | CarSat1 | red    | na |
| chrUn | 69687937 | 69688384 | 448  | CarSat1 | red    | na |
| chrUn | 69688405 | 69689401 | 997  | CarSat1 | red    | na |
| chrUn | 69689802 | 69690669 | 868  | CarSat1 | red    | na |
| chrUn | 69701616 | 69702509 | 894  | CarSat1 | red    | na |
| chrUn | 69702732 | 69703759 | 1028 | CarSat1 | red    | na |
| chrUn | 69705746 | 69707062 | 1317 | CarSat1 | red    | na |
| chrUn | 69708138 | 69710774 | 2637 | CarSat1 | red    | na |
| chrUn | 69710799 | 69710925 | 127  | Carsat2 | orange | na |
| chrUn | 69710814 | 69711791 | 978  | CarSat1 | red    | na |
| chrUn | 69711812 | 69716211 | 4400 | CarSat1 | red    | na |
| chrUn | 69716238 | 69716948 | 711  | CarSat1 | red    | na |
| chrUn | 69716975 | 69719812 | 2838 | CarSat1 | red    | na |
| chrUn | 69733508 | 69735271 | 1764 | CarSat1 | red    | na |
| chrUn | 69735298 | 69736008 | 711  | CarSat1 | red    | na |
| chrUn | 69736035 | 69737732 | 1698 | CarSat1 | red    | na |
| chrUn | 69737757 | 69738469 | 713  | CarSat1 | red    | na |
| chrUn | 69738494 | 69742883 | 4390 | CarSat1 | red    | na |
| chrUn | 69742908 | 69743844 | 937  | CarSat1 | red    | na |
| chrUn | 69743874 | 69744581 | 708  | CarSat1 | red    | na |
| chrUn | 69744611 | 69745178 | 568  | CarSat1 | red    | na |
| chrUn | 69746182 | 69746808 | 627  | CarSat1 | red    | na |
| chrUn | 69746823 | 69746950 | 128  | Carsat2 | orange | na |
| chrUn | 69746838 | 69749758 | 2921 | CarSat1 | red    | na |
| chrUn | 69749773 | 69749900 | 128  | Carsat2 | orange | na |
| chrUn | 69749788 | 69751504 | 1717 | CarSat1 | red    | na |
| chrUn | 69751525 | 69753966 | 2442 | CarSat1 | red    | na |
| chrUn | 69753992 | 69756811 | 2820 | CarSat1 | red    | na |
| chrUn | 69756933 | 69757839 | 907  | CarSat1 | red    | na |
| chrUn | 69758859 | 69759953 | 1095 | CarSat1 | red    | na |
| chrUn | 69759980 | 69760690 | 711  | CarSat1 | red    | na |
| chrUn | 69760717 | 69761426 | 710  | CarSat1 | red    | na |
| chrUn | 69761452 | 69762646 | 1195 | CarSat1 | red    | na |
| chrUn | 69762662 | 69764113 | 1452 | CarSat1 | red    | na |
| chrUn | 69764138 | 69765099 | 962  | CarSat1 | red    | na |
| chrUn | 69765126 | 69765837 | 712  | CarSat1 | red    | na |



|       |          |          |      |         |     |    |
|-------|----------|----------|------|---------|-----|----|
| chrUn | 69765881 | 69767235 | 1355 | CarSat1 | red | na |
| chrUn | 69767272 | 69768481 | 1210 | CarSat1 | red | na |
| chrUn | 69768497 | 69769455 | 959  | CarSat1 | red | na |
| chrUn | 69769482 | 69770461 | 980  | CarSat1 | red | na |
| chrUn | 69796806 | 69798329 | 1524 | CarSat1 | red | na |
| chrUn | 69798354 | 69799321 | 968  | CarSat1 | red | na |
| chrUn | 69799342 | 69800054 | 713  | CarSat1 | red | na |
| chrUn | 69800075 | 69803264 | 3190 | CarSat1 | red | na |
| chrUn | 69803294 | 69803740 | 447  | CarSat1 | red | na |
| chrUn | 69803759 | 69804478 | 720  | CarSat1 | red | na |
| chrUn | 69804499 | 69807908 | 3410 | CarSat1 | red | na |
| chrUn | 69807933 | 69808424 | 492  | CarSat1 | red | na |
| chrUn | 69822092 | 69822863 | 772  | CarSat1 | red | na |
| chrUn | 69822878 | 69825057 | 2180 | CarSat1 | red | na |
| chrUn | 69825087 | 69826264 | 1178 | CarSat1 | red | na |
| chrUn | 69826291 | 69827001 | 711  | CarSat1 | red | na |
| chrUn | 69827028 | 69827738 | 711  | CarSat1 | red | na |
| chrUn | 69827765 | 69829212 | 1448 | CarSat1 | red | na |
| chrUn | 69829239 | 69829950 | 712  | CarSat1 | red | na |
| chrUn | 69829977 | 69830688 | 712  | CarSat1 | red | na |
| chrUn | 69830715 | 69831425 | 711  | CarSat1 | red | na |
| chrUn | 69831452 | 69832898 | 1447 | CarSat1 | red | na |
| chrUn | 69832925 | 69833636 | 712  | CarSat1 | red | na |
| chrUn | 69834723 | 69835666 | 944  | CarSat1 | red | na |
| chrUn | 69835693 | 69839598 | 3906 | CarSat1 | red | na |
| chrUn | 69839614 | 69840569 | 956  | CarSat1 | red | na |
| chrUn | 69840596 | 69841305 | 710  | CarSat1 | red | na |
| chrUn | 69841333 | 69842294 | 962  | CarSat1 | red | na |
| chrUn | 69842310 | 69842778 | 469  | CarSat1 | red | na |
| chrUn | 69842805 | 69843514 | 710  | CarSat1 | red | na |
| chrUn | 69843541 | 69844504 | 964  | CarSat1 | red | na |
| chrUn | 69844520 | 69846304 | 1785 | CarSat1 | red | na |
| chrUn | 69847310 | 69847756 | 447  | CarSat1 | red | na |
| chrUn | 69847795 | 69851171 | 3377 | CarSat1 | red | na |
| chrUn | 69851201 | 69852433 | 1233 | CarSat1 | red | na |
| chrUn | 69852460 | 69853170 | 711  | CarSat1 | red | na |
| chrUn | 69853186 | 69853655 | 470  | CarSat1 | red | na |
| chrUn | 69853682 | 69855866 | 2185 | CarSat1 | red | na |
| chrUn | 69855893 | 69857809 | 1917 | CarSat1 | red | na |
| chrUn | 69857832 | 69858907 | 1076 | CarSat1 | red | na |
| chrUn | 69860013 | 69861909 | 1897 | CarSat1 | red | na |
| chrUn | 69861925 | 69863382 | 1458 | CarSat1 | red | na |

|       |          |          |      |         |        |    |
|-------|----------|----------|------|---------|--------|----|
| chrUn | 69863398 | 69864358 | 961  | CarSat1 | red    | na |
| chrUn | 69864385 | 69864854 | 470  | CarSat1 | red    | na |
| chrUn | 69864870 | 69866569 | 1700 | CarSat1 | red    | na |
| chrUn | 69866596 | 69868535 | 1940 | CarSat1 | red    | na |
| chrUn | 69868551 | 69870010 | 1460 | CarSat1 | red    | na |
| chrUn | 69870026 | 69871098 | 1073 | CarSat1 | red    | na |
| chrUn | 69872516 | 69873783 | 1268 | CarSat1 | red    | na |
| chrUn | 69873813 | 69875770 | 1958 | CarSat1 | red    | na |
| chrUn | 69875794 | 69877246 | 1453 | CarSat1 | red    | na |
| chrUn | 69877270 | 69880430 | 3161 | CarSat1 | red    | na |
| chrUn | 69880445 | 69880571 | 127  | Carsat2 | orange | na |
| chrUn | 69880460 | 69881686 | 1227 | CarSat1 | red    | na |
| chrUn | 69881710 | 69884084 | 2375 | CarSat1 | red    | na |
| chrUn | 69885090 | 69886114 | 1025 | CarSat1 | red    | na |
| chrUn | 69886144 | 69886857 | 714  | CarSat1 | red    | na |
| chrUn | 69886887 | 69887821 | 935  | CarSat1 | red    | na |
| chrUn | 69887845 | 69889789 | 1945 | CarSat1 | red    | na |
| chrUn | 69889819 | 69890298 | 480  | CarSat1 | red    | na |
| chrUn | 69890556 | 69892252 | 1697 | CarSat1 | red    | na |
| chrUn | 69892282 | 69894697 | 2416 | CarSat1 | red    | na |
| chrUn | 69894713 | 69895945 | 1233 | CarSat1 | red    | na |
| chrUn | 69895974 | 69896672 | 699  | CarSat1 | red    | na |
| chrUn | 69897674 | 69898216 | 543  | CarSat1 | red    | na |
| chrUn | 69898237 | 69899279 | 1043 | CarSat1 | red    | na |
| chrUn | 69899309 | 69900017 | 709  | CarSat1 | red    | na |
| chrUn | 69900047 | 69904455 | 4409 | CarSat1 | red    | na |
| chrUn | 69904470 | 69906148 | 1679 | CarSat1 | red    | na |
| chrUn | 69906172 | 69907126 | 955  | CarSat1 | red    | na |
| chrUn | 69907153 | 69908350 | 1198 | CarSat1 | red    | na |
| chrUn | 69908375 | 69909255 | 881  | CarSat1 | red    | na |
| chrUn | 69922942 | 69923795 | 854  | CarSat1 | red    | na |
| chrUn | 69923828 | 69924757 | 930  | CarSat1 | red    | na |
| chrUn | 69924787 | 69925494 | 708  | CarSat1 | red    | na |
| chrUn | 69925524 | 69927239 | 1716 | CarSat1 | red    | na |
| chrUn | 69927263 | 69929183 | 1921 | CarSat1 | red    | na |
| chrUn | 69929213 | 69929921 | 709  | CarSat1 | red    | na |
| chrUn | 69929936 | 69930063 | 128  | Carsat2 | orange | na |
| chrUn | 69929951 | 69931182 | 1232 | CarSat1 | red    | na |
| chrUn | 69931207 | 69931909 | 703  | CarSat1 | red    | na |
| chrUn | 69931934 | 69934392 | 2459 | CarSat1 | red    | na |
| chrUn | 69947981 | 69951881 | 3901 | CarSat1 | red    | na |
| chrUn | 69951906 | 69953108 | 1203 | CarSat1 | red    | na |

|       |          |          |      |         |        |    |
|-------|----------|----------|------|---------|--------|----|
| chrUn | 69953133 | 69954829 | 1697 | CarSat1 | red    | na |
| chrUn | 69954854 | 69956061 | 1208 | CarSat1 | red    | na |
| chrUn | 69956082 | 69956798 | 717  | CarSat1 | red    | na |
| chrUn | 69956819 | 69957536 | 718  | CarSat1 | red    | na |
| chrUn | 69957557 | 69958002 | 446  | CarSat1 | red    | na |
| chrUn | 69958032 | 69958738 | 707  | CarSat1 | red    | na |
| chrUn | 69958752 | 69958879 | 128  | Carsat2 | orange | na |
| chrUn | 69958768 | 69959528 | 761  | CarSat1 | red    | na |
| chrUn | 69988244 | 69989158 | 915  | CarSat1 | red    | na |
| chrUn | 69989173 | 69989299 | 127  | Carsat2 | orange | na |
| chrUn | 69989188 | 69990631 | 1444 | CarSat1 | red    | na |
| chrUn | 69990646 | 69990773 | 128  | Carsat2 | orange | na |
| chrUn | 69990661 | 69992106 | 1446 | CarSat1 | red    | na |
| chrUn | 69992136 | 69995795 | 3660 | CarSat1 | red    | na |
| chrUn | 69995810 | 69995935 | 126  | Carsat2 | orange | na |
| chrUn | 69995825 | 69996531 | 707  | CarSat1 | red    | na |
| chrUn | 69996546 | 69996673 | 128  | Carsat2 | orange | na |
| chrUn | 69996561 | 69997269 | 709  | CarSat1 | red    | na |
| chrUn | 69997284 | 69997410 | 127  | Carsat2 | orange | na |
| chrUn | 69997299 | 69998004 | 706  | CarSat1 | red    | na |
| chrUn | 69998019 | 69998145 | 127  | Carsat2 | orange | na |
| chrUn | 69998034 | 69999797 | 1764 | CarSat1 | red    | na |
| chrUn | 70000802 | 70003127 | 2326 | CarSat1 | red    | na |
| chrUn | 70003152 | 70003855 | 704  | CarSat1 | red    | na |
| chrUn | 70003880 | 70004373 | 494  | CarSat1 | red    | na |
| chrUn | 70004410 | 70005337 | 928  | CarSat1 | red    | na |
| chrUn | 70005362 | 70006065 | 704  | CarSat1 | red    | na |
| chrUn | 70006090 | 70006815 | 726  | CarSat1 | red    | na |
| chrUn | 70006840 | 70007551 | 712  | CarSat1 | red    | na |
| chrUn | 70007576 | 70009761 | 2186 | CarSat1 | red    | na |
| chrUn | 70009786 | 70010746 | 961  | CarSat1 | red    | na |
| chrUn | 70010767 | 70011483 | 717  | CarSat1 | red    | na |
| chrUn | 70011530 | 70012343 | 814  | CarSat1 | red    | na |
| chrUn | 70019093 | 70019208 | 116  | SAT1_CF | blue   | na |
| chrUn | 70019264 | 70019811 | 548  | SAT1_CF | blue   | na |
| chrUn | 70019823 | 70020436 | 614  | SAT1_CF | blue   | na |
| chrUn | 70020458 | 70021651 | 1194 | SAT1_CF | blue   | na |
| chrUn | 70021695 | 70022225 | 531  | SAT1_CF | blue   | na |
| chrUn | 70022267 | 70023011 | 745  | SAT1_CF | blue   | na |
| chrUn | 70023006 | 70023728 | 723  | CarSat1 | red    | na |
| chrUn | 70023883 | 70024171 | 289  | CarSat1 | red    | na |
| chrUn | 70025902 | 70026704 | 803  | CarSat1 | red    | na |

|       |          |          |      |         |        |    |
|-------|----------|----------|------|---------|--------|----|
| chrUn | 70026731 | 70028663 | 1933 | CarSat1 | red    | na |
| chrUn | 70028688 | 70029400 | 713  | CarSat1 | red    | na |
| chrUn | 70029434 | 70030654 | 1221 | CarSat1 | red    | na |
| chrUn | 70030684 | 70031389 | 706  | CarSat1 | red    | na |
| chrUn | 70031419 | 70032497 | 1079 | CarSat1 | red    | na |
| chrUn | 70033995 | 70036378 | 2384 | CarSat1 | red    | na |
| chrUn | 70036408 | 70037852 | 1445 | CarSat1 | red    | na |
| chrUn | 70037882 | 70038898 | 1017 | CarSat1 | red    | na |
| chrUn | 70039928 | 70040623 | 696  | CarSat1 | red    | na |
| chrUn | 70040805 | 70042693 | 1889 | CarSat1 | red    | na |
| chrUn | 70042725 | 70044435 | 1711 | CarSat1 | red    | na |
| chrUn | 70044465 | 70045172 | 708  | CarSat1 | red    | na |
| chrUn | 70045202 | 70045909 | 708  | CarSat1 | red    | na |
| chrUn | 70045939 | 70046647 | 709  | CarSat1 | red    | na |
| chrUn | 70046677 | 70048861 | 2185 | CarSat1 | red    | na |
| chrUn | 70048889 | 70049597 | 709  | CarSat1 | red    | na |
| chrUn | 70049627 | 70050336 | 710  | CarSat1 | red    | na |
| chrUn | 70050366 | 70050806 | 441  | CarSat1 | red    | na |
| chrUn | 70050833 | 70051424 | 592  | CarSat1 | red    | na |
| chrUn | 70052434 | 70053155 | 722  | CarSat1 | red    | na |
| chrUn | 70053171 | 70055583 | 2413 | CarSat1 | red    | na |
| chrUn | 70055598 | 70055725 | 128  | Carsat2 | orange | na |
| chrUn | 70055613 | 70056588 | 976  | CarSat1 | red    | na |
| chrUn | 70056615 | 70057763 | 1149 | CarSat1 | red    | na |
| chrUn | 70057945 | 70058516 | 572  | CarSat1 | red    | na |
| chrUn | 70058532 | 70059253 | 722  | CarSat1 | red    | na |
| chrUn | 70059269 | 70060476 | 1208 | CarSat1 | red    | na |
| chrUn | 70060503 | 70062942 | 2440 | CarSat1 | red    | na |
| chrUn | 70062967 | 70063910 | 944  | CarSat1 | red    | na |
| chrUn | 70064926 | 70065309 | 384  | SAT1_CF | blue   | na |
| chrUn | 70065321 | 70066144 | 824  | SAT1_CF | blue   | na |
| chrUn | 70066156 | 70067314 | 1159 | SAT1_CF | blue   | na |
| chrUn | 70067342 | 70067499 | 158  | SAT1_CF | blue   | na |
| chrUn | 70067544 | 70068742 | 1199 | SAT1_CF | blue   | na |
| chrUn | 70068762 | 70069432 | 671  | SAT1_CF | blue   | na |
| chrUn | 70069512 | 70070140 | 629  | SAT1_CF | blue   | na |
| chrUn | 70070152 | 70070831 | 680  | SAT1_CF | blue   | na |
| chrUn | 70070873 | 70072910 | 2038 | SAT1_CF | blue   | na |
| chrUn | 70072931 | 70073572 | 642  | SAT1_CF | blue   | na |
| chrUn | 70077418 | 70077858 | 441  | CarSat1 | red    | na |
| chrUn | 70077885 | 70078865 | 981  | CarSat1 | red    | na |
| chrUn | 70078895 | 70079604 | 710  | CarSat1 | red    | na |

|       |          |          |      |         |      |    |
|-------|----------|----------|------|---------|------|----|
| chrUn | 70079634 | 70080342 | 709  | CarSat1 | red  | na |
| chrUn | 70080372 | 70081078 | 707  | CarSat1 | red  | na |
| chrUn | 70081116 | 70081816 | 701  | CarSat1 | red  | na |
| chrUn | 70081846 | 70083023 | 1178 | CarSat1 | red  | na |
| chrUn | 70083051 | 70083763 | 713  | CarSat1 | red  | na |
| chrUn | 70083785 | 70084495 | 711  | CarSat1 | red  | na |
| chrUn | 70084522 | 70085501 | 980  | CarSat1 | red  | na |
| chrUn | 70085531 | 70086704 | 1174 | CarSat1 | red  | na |
| chrUn | 70086746 | 70087432 | 687  | CarSat1 | red  | na |
| chrUn | 70087474 | 70088888 | 1415 | CarSat1 | red  | na |
| chrUn | 70089891 | 70091613 | 1723 | SAT1_CF | blue | na |
| chrUn | 70091642 | 70092165 | 524  | SAT1_CF | blue | na |
| chrUn | 70092180 | 70092883 | 704  | SAT1_CF | blue | na |
| chrUn | 70092897 | 70093505 | 609  | SAT1_CF | blue | na |
| chrUn | 70093517 | 70094375 | 859  | SAT1_CF | blue | na |
| chrUn | 70094417 | 70096224 | 1808 | SAT1_CF | blue | na |
| chrUn | 70096292 | 70096811 | 520  | SAT1_CF | blue | na |
| chrUn | 70096823 | 70096939 | 117  | SAT1_CF | blue | na |
| chrUn | 70096953 | 70098098 | 1146 | SAT1_CF | blue | na |
| chrUn | 70098114 | 70098582 | 469  | SAT1_CF | blue | na |
| chrUn | 70098629 | 70099994 | 1366 | SAT1_CF | blue | na |
| chrUn | 70100007 | 70100104 | 98   | SAT1_CF | blue | na |
| chrUn | 70100136 | 70100664 | 529  | SAT1_CF | blue | na |
| chrUn | 70100676 | 70101352 | 677  | SAT1_CF | blue | na |
| chrUn | 70102353 | 70104053 | 1701 | CarSat1 | red  | na |
| chrUn | 70104080 | 70105778 | 1699 | CarSat1 | red  | na |
| chrUn | 70105794 | 70106729 | 936  | CarSat1 | red  | na |
| chrUn | 70106759 | 70108002 | 1244 | CarSat1 | red  | na |
| chrUn | 70108028 | 70108486 | 459  | CarSat1 | red  | na |
| chrUn | 70108513 | 70109223 | 711  | CarSat1 | red  | na |
| chrUn | 70109250 | 70109958 | 709  | CarSat1 | red  | na |
| chrUn | 70109985 | 70110696 | 712  | CarSat1 | red  | na |
| chrUn | 70110722 | 70111432 | 711  | CarSat1 | red  | na |
| chrUn | 70111459 | 70113805 | 2347 | CarSat1 | red  | na |
| chrUn | 70114808 | 70115515 | 708  | CarSat1 | red  | na |
| chrUn | 70115531 | 70117475 | 1945 | CarSat1 | red  | na |
| chrUn | 70117502 | 70118212 | 711  | CarSat1 | red  | na |
| chrUn | 70118239 | 70118952 | 714  | CarSat1 | red  | na |
| chrUn | 70118977 | 70119688 | 712  | CarSat1 | red  | na |
| chrUn | 70119715 | 70120427 | 713  | CarSat1 | red  | na |
| chrUn | 70120454 | 70121900 | 1447 | CarSat1 | red  | na |
| chrUn | 70121927 | 70123105 | 1179 | CarSat1 | red  | na |

|       |          |          |      |         |     |    |
|-------|----------|----------|------|---------|-----|----|
| chrUn | 70123135 | 70124113 | 979  | CarSat1 | red | na |
| chrUn | 70124140 | 70126254 | 2115 | CarSat1 | red | na |
| chrUn | 70173320 | 70174279 | 960  | CarSat1 | red | na |
| chrUn | 70174304 | 70178003 | 3700 | CarSat1 | red | na |
| chrUn | 70178028 | 70180214 | 2187 | CarSat1 | red | na |
| chrUn | 70180239 | 70181689 | 1451 | CarSat1 | red | na |
| chrUn | 70181714 | 70183376 | 1663 | CarSat1 | red | na |
| chrUn | 70183406 | 70184752 | 1347 | CarSat1 | red | na |
| chrUn | 70230526 | 70233252 | 2727 | CarSat1 | red | na |
| chrUn | 70233279 | 70234232 | 954  | CarSat1 | red | na |
| chrUn | 70234266 | 70234978 | 713  | CarSat1 | red | na |
| chrUn | 70235003 | 70235611 | 609  | CarSat1 | red | na |
| chrUn | 70236684 | 70237742 | 1059 | CarSat1 | red | na |
| chrUn | 70237769 | 70238478 | 710  | CarSat1 | red | na |
| chrUn | 70238505 | 70240196 | 1692 | CarSat1 | red | na |
| chrUn | 70240221 | 70240933 | 713  | CarSat1 | red | na |
| chrUn | 70240958 | 70242409 | 1452 | CarSat1 | red | na |
| chrUn | 70242434 | 70242993 | 560  | CarSat1 | red | na |
| chrUn | 70244005 | 70244936 | 932  | CarSat1 | red | na |
| chrUn | 70244961 | 70246420 | 1460 | CarSat1 | red | na |
| chrUn | 70246432 | 70247669 | 1238 | CarSat1 | red | na |
| chrUn | 70247684 | 70248609 | 926  | CarSat1 | red | na |
| chrUn | 70248642 | 70249142 | 501  | CarSat1 | red | na |
| chrUn | 70249157 | 70249878 | 722  | CarSat1 | red | na |
| chrUn | 70249893 | 70250614 | 722  | CarSat1 | red | na |
| chrUn | 70250629 | 70251351 | 723  | CarSat1 | red | na |
| chrUn | 70251366 | 70252074 | 709  | CarSat1 | red | na |
| chrUn | 70252104 | 70252823 | 720  | CarSat1 | red | na |
| chrUn | 70252838 | 70253773 | 936  | CarSat1 | red | na |
| chrUn | 70253796 | 70255415 | 1620 | CarSat1 | red | na |
| chrUn | 70268845 | 70269547 | 703  | CarSat1 | red | na |
| chrUn | 70269560 | 70269657 | 98   | CarSat1 | red | na |
| chrUn | 70269839 | 70271236 | 1398 | CarSat1 | red | na |
| chrUn | 70271270 | 70271342 | 73   | CarSat1 | red | na |
| chrUn | 70271524 | 70272189 | 666  | CarSat1 | red | na |
| chrUn | 70272214 | 70272918 | 705  | CarSat1 | red | na |
| chrUn | 70272943 | 70274393 | 1451 | CarSat1 | red | na |
| chrUn | 70274418 | 70276826 | 2409 | CarSat1 | red | na |
| chrUn | 70276856 | 70277557 | 702  | CarSat1 | red | na |
| chrUn | 70277594 | 70278088 | 495  | CarSat1 | red | na |
| chrUn | 70278113 | 70280116 | 2004 | CarSat1 | red | na |
| chrUn | 70281220 | 70281821 | 602  | CarSat1 | red | na |

|       |          |          |      |         |     |    |
|-------|----------|----------|------|---------|-----|----|
| chrUn | 70281851 | 70282571 | 721  | CarSat1 | red | na |
| chrUn | 70282586 | 70283312 | 727  | CarSat1 | red | na |
| chrUn | 70283327 | 70284786 | 1460 | CarSat1 | red | na |
| chrUn | 70284801 | 70285523 | 723  | CarSat1 | red | na |
| chrUn | 70285538 | 70286257 | 720  | CarSat1 | red | na |
| chrUn | 70286272 | 70287717 | 1446 | CarSat1 | red | na |
| chrUn | 70287747 | 70289196 | 1450 | CarSat1 | red | na |
| chrUn | 70289226 | 70289932 | 707  | CarSat1 | red | na |
| chrUn | 70289962 | 70290892 | 931  | CarSat1 | red | na |
| chrUn | 70290925 | 70291425 | 501  | CarSat1 | red | na |
| chrUn | 70291440 | 70292607 | 1168 | CarSat1 | red | na |
| chrUn | 70303870 | 70303901 | 32   | HSATII  | na  | na |
| chrUn | 70306006 | 70307154 | 1149 | CarSat1 | red | na |
| chrUn | 70307175 | 70308140 | 966  | CarSat1 | red | na |
| chrUn | 70308165 | 70308625 | 461  | CarSat1 | red | na |
| chrUn | 70308646 | 70310836 | 2191 | CarSat1 | red | na |
| chrUn | 70310863 | 70312552 | 1690 | CarSat1 | red | na |
| chrUn | 70312577 | 70313504 | 928  | CarSat1 | red | na |
| chrUn | 70313540 | 70314758 | 1219 | CarSat1 | red | na |
| chrUn | 70314783 | 70315252 | 470  | CarSat1 | red | na |
| chrUn | 70315273 | 70315713 | 441  | CarSat1 | red | na |
| chrUn | 70315750 | 70317386 | 1637 | CarSat1 | red | na |
| chrUn | 70352406 | 70353172 | 767  | CarSat1 | red | na |
| chrUn | 70353202 | 70353923 | 722  | CarSat1 | red | na |
| chrUn | 70353938 | 70354660 | 723  | CarSat1 | red | na |
| chrUn | 70354675 | 70356124 | 1450 | CarSat1 | red | na |
| chrUn | 70356154 | 70357597 | 1444 | CarSat1 | red | na |
| chrUn | 70357627 | 70358335 | 709  | CarSat1 | red | na |
| chrUn | 70358365 | 70359292 | 928  | CarSat1 | red | na |
| chrUn | 70359325 | 70359824 | 500  | CarSat1 | red | na |
| chrUn | 70359839 | 70360566 | 728  | CarSat1 | red | na |
| chrUn | 70360581 | 70361302 | 722  | CarSat1 | red | na |
| chrUn | 70361317 | 70362039 | 723  | CarSat1 | red | na |
| chrUn | 70362054 | 70362761 | 708  | CarSat1 | red | na |
| chrUn | 70362791 | 70363773 | 983  | CarSat1 | red | na |
| chrUn | 70365457 | 70366020 | 564  | CarSat1 | red | na |
| chrUn | 70366050 | 70366708 | 659  | CarSat1 | red | na |
| chrUn | 70366907 | 70366965 | 59   | CarSat1 | red | na |
| chrUn | 70366995 | 70367149 | 155  | CarSat1 | red | na |
| chrUn | 70367330 | 70370103 | 2774 | CarSat1 | red | na |
| chrUn | 70370141 | 70370287 | 147  | CarSat1 | red | na |
| chrUn | 70370475 | 70371037 | 563  | CarSat1 | red | na |

|       |          |          |      |         |     |    |
|-------|----------|----------|------|---------|-----|----|
| chrUn | 70371067 | 70371727 | 661  | CarSat1 | red | na |
| chrUn | 70371923 | 70371985 | 63   | CarSat1 | red | na |
| chrUn | 70372015 | 70372169 | 155  | CarSat1 | red | na |
| chrUn | 70372351 | 70372913 | 563  | CarSat1 | red | na |
| chrUn | 70372943 | 70373649 | 707  | CarSat1 | red | na |
| chrUn | 70373687 | 70373833 | 147  | CarSat1 | red | na |
| chrUn | 70374020 | 70374582 | 563  | CarSat1 | red | na |
| chrUn | 70374612 | 70375318 | 707  | CarSat1 | red | na |
| chrUn | 70375356 | 70375502 | 147  | CarSat1 | red | na |
| chrUn | 70375688 | 70376118 | 431  | CarSat1 | red | na |
| chrUn | 70389468 | 70390256 | 789  | CarSat1 | red | na |
| chrUn | 70390281 | 70392959 | 2679 | CarSat1 | red | na |
| chrUn | 70392984 | 70394216 | 1233 | CarSat1 | red | na |
| chrUn | 70394246 | 70395918 | 1673 | CarSat1 | red | na |
| chrUn | 70395934 | 70396895 | 962  | CarSat1 | red | na |
| chrUn | 70396922 | 70397633 | 712  | CarSat1 | red | na |
| chrUn | 70397660 | 70398370 | 711  | CarSat1 | red | na |
| chrUn | 70398397 | 70400782 | 2386 | CarSat1 | red | na |
| chrUn | 70414149 | 70415288 | 1140 | CarSat1 | red | na |
| chrUn | 70415315 | 70417499 | 2185 | CarSat1 | red | na |
| chrUn | 70417526 | 70418235 | 710  | CarSat1 | red | na |
| chrUn | 70418270 | 70419471 | 1202 | CarSat1 | red | na |
| chrUn | 70419487 | 70420944 | 1458 | CarSat1 | red | na |
| chrUn | 70420960 | 70421672 | 713  | CarSat1 | red | na |
| chrUn | 70421697 | 70423157 | 1461 | CarSat1 | red | na |
| chrUn | 70423173 | 70424134 | 962  | CarSat1 | red | na |
| chrUn | 70424161 | 70424633 | 473  | CarSat1 | red | na |
| chrUn | 70424646 | 70425411 | 766  | CarSat1 | red | na |
| chrUn | 70426411 | 70427097 | 687  | CarSat1 | red | na |
| chrUn | 70427127 | 70427835 | 709  | CarSat1 | red | na |
| chrUn | 70427865 | 70428573 | 709  | CarSat1 | red | na |
| chrUn | 70428603 | 70429041 | 439  | CarSat1 | red | na |
| chrUn | 70429068 | 70430784 | 1717 | CarSat1 | red | na |
| chrUn | 70430814 | 70431536 | 723  | CarSat1 | red | na |
| chrUn | 70431552 | 70432260 | 709  | CarSat1 | red | na |
| chrUn | 70432290 | 70435948 | 3659 | CarSat1 | red | na |
| chrUn | 70435978 | 70436684 | 707  | CarSat1 | red | na |
| chrUn | 70436714 | 70437696 | 983  | CarSat1 | red | na |
| chrUn | 70438709 | 70439989 | 1281 | CarSat1 | red | na |
| chrUn | 70440014 | 70440725 | 712  | CarSat1 | red | na |
| chrUn | 70440750 | 70441955 | 1206 | CarSat1 | red | na |
| chrUn | 70441994 | 70442945 | 952  | CarSat1 | red | na |



|       |          |          |      |         |        |    |
|-------|----------|----------|------|---------|--------|----|
| chrUn | 70442961 | 70443682 | 722  | CarSat1 | red    | na |
| chrUn | 70443698 | 70444418 | 721  | CarSat1 | red    | na |
| chrUn | 70444434 | 70444903 | 470  | CarSat1 | red    | na |
| chrUn | 70444930 | 70446628 | 1699 | CarSat1 | red    | na |
| chrUn | 70446644 | 70447364 | 721  | CarSat1 | red    | na |
| chrUn | 70447380 | 70448839 | 1460 | CarSat1 | red    | na |
| chrUn | 70448855 | 70450005 | 1151 | CarSat1 | red    | na |
| chrUn | 70451118 | 70451543 | 426  | CarSat1 | red    | na |
| chrUn | 70451575 | 70452299 | 725  | CarSat1 | red    | na |
| chrUn | 70452292 | 70453236 | 945  | SAT1_CF | blue   | na |
| chrUn | 70453254 | 70455478 | 2225 | SAT1_CF | blue   | na |
| chrUn | 70455513 | 70455872 | 360  | SAT1_CF | blue   | na |
| chrUn | 70455915 | 70456550 | 636  | SAT1_CF | blue   | na |
| chrUn | 70456733 | 70457751 | 1019 | SAT1_CF | blue   | na |
| chrUn | 70457782 | 70458333 | 552  | SAT1_CF | blue   | na |
| chrUn | 70458410 | 70459533 | 1124 | SAT1_CF | blue   | na |
| chrUn | 70459596 | 70459706 | 111  | SAT1_CF | blue   | na |
| chrUn | 70463277 | 70463368 | 92   | Carsat2 | orange | na |
| chrUn | 70463287 | 70464184 | 898  | CarSat1 | red    | na |
| chrUn | 70464200 | 70464669 | 470  | CarSat1 | red    | na |
| chrUn | 70464696 | 70465652 | 957  | CarSat1 | red    | na |
| chrUn | 70465668 | 70466389 | 722  | CarSat1 | red    | na |
| chrUn | 70466405 | 70467859 | 1455 | CarSat1 | red    | na |
| chrUn | 70467875 | 70468594 | 720  | CarSat1 | red    | na |
| chrUn | 70468619 | 70470058 | 1440 | CarSat1 | red    | na |
| chrUn | 70470083 | 70471531 | 1449 | CarSat1 | red    | na |
| chrUn | 70471556 | 70472485 | 930  | CarSat1 | red    | na |
| chrUn | 70472520 | 70473228 | 709  | CarSat1 | red    | na |
| chrUn | 70473258 | 70474534 | 1277 | CarSat1 | red    | na |
| chrUn | 70508952 | 70509528 | 577  | CarSat1 | red    | na |
| chrUn | 70509544 | 70510266 | 723  | CarSat1 | red    | na |
| chrUn | 70510282 | 70511491 | 1210 | CarSat1 | red    | na |
| chrUn | 70511518 | 70512230 | 713  | CarSat1 | red    | na |
| chrUn | 70512257 | 70512966 | 710  | CarSat1 | red    | na |
| chrUn | 70512993 | 70513954 | 962  | CarSat1 | red    | na |
| chrUn | 70513970 | 70514690 | 721  | CarSat1 | red    | na |
| chrUn | 70514706 | 70515913 | 1208 | CarSat1 | red    | na |
| chrUn | 70515940 | 70516651 | 712  | CarSat1 | red    | na |
| chrUn | 70516678 | 70517389 | 712  | CarSat1 | red    | na |
| chrUn | 70517416 | 70519599 | 2184 | CarSat1 | red    | na |
| chrUn | 70519626 | 70520180 | 555  | CarSat1 | red    | na |
| chrUn | 70521205 | 70521720 | 516  | CarSat1 | red    | na |

|       |          |          |      |         |        |    |
|-------|----------|----------|------|---------|--------|----|
| chrUn | 70521750 | 70524930 | 3181 | CarSat1 | red    | na |
| chrUn | 70524951 | 70526737 | 1787 | CarSat1 | red    | na |
| chrUn | 70526797 | 70532423 | 5627 | CarSat1 | red    | na |
| chrUn | 70545871 | 70546844 | 974  | CarSat1 | red    | na |
| chrUn | 70546859 | 70546986 | 128  | Carsat2 | orange | na |
| chrUn | 70546874 | 70547580 | 707  | CarSat1 | red    | na |
| chrUn | 70547610 | 70549053 | 1444 | CarSat1 | red    | na |
| chrUn | 70549068 | 70549194 | 127  | Carsat2 | orange | na |
| chrUn | 70549083 | 70549790 | 708  | CarSat1 | red    | na |
| chrUn | 70549805 | 70549929 | 125  | Carsat2 | orange | na |
| chrUn | 70549820 | 70550528 | 709  | CarSat1 | red    | na |
| chrUn | 70550543 | 70550670 | 128  | Carsat2 | orange | na |
| chrUn | 70550558 | 70551264 | 707  | CarSat1 | red    | na |
| chrUn | 70551294 | 70552738 | 1445 | CarSat1 | red    | na |
| chrUn | 70552768 | 70553475 | 708  | CarSat1 | red    | na |
| chrUn | 70553505 | 70554212 | 708  | CarSat1 | red    | na |
| chrUn | 70554227 | 70554354 | 128  | Carsat2 | orange | na |
| chrUn | 70554242 | 70554728 | 487  | CarSat1 | red    | na |
| chrUn | 70554761 | 70555465 | 705  | CarSat1 | red    | na |
| chrUn | 70555498 | 70557073 | 1576 | CarSat1 | red    | na |
| chrUn | 70558134 | 70558761 | 628  | CarSat1 | red    | na |
| chrUn | 70558786 | 70559497 | 712  | CarSat1 | red    | na |
| chrUn | 70559522 | 70560243 | 722  | CarSat1 | red    | na |
| chrUn | 70560268 | 70562223 | 1956 | CarSat1 | red    | na |
| chrUn | 70562253 | 70562699 | 447  | CarSat1 | red    | na |
| chrUn | 70562720 | 70563435 | 716  | CarSat1 | red    | na |
| chrUn | 70563456 | 70564173 | 718  | CarSat1 | red    | na |
| chrUn | 70564194 | 70564908 | 715  | CarSat1 | red    | na |
| chrUn | 70564929 | 70566102 | 1174 | CarSat1 | red    | na |
| chrUn | 70566175 | 70566736 | 562  | CarSat1 | red    | na |
| chrUn | 70566766 | 70567689 | 924  | CarSat1 | red    | na |
| chrUn | 70567714 | 70568436 | 723  | CarSat1 | red    | na |
| chrUn | 70568461 | 70569304 | 844  | CarSat1 | red    | na |
| chrUn | 70570345 | 70571550 | 1206 | CarSat1 | red    | na |
| chrUn | 70571565 | 70572289 | 725  | CarSat1 | red    | na |
| chrUn | 70572304 | 70573239 | 936  | CarSat1 | red    | na |
| chrUn | 70573264 | 70573983 | 720  | CarSat1 | red    | na |
| chrUn | 70573995 | 70577655 | 3661 | CarSat1 | red    | na |
| chrUn | 70577680 | 70578637 | 958  | CarSat1 | red    | na |
| chrUn | 70578658 | 70581539 | 2882 | CarSat1 | red    | na |
| chrUn | 70596092 | 70598579 | 2488 | CarSat1 | red    | na |
| chrUn | 70598609 | 70600329 | 1721 | CarSat1 | red    | na |

|       |          |          |      |         |     |    |
|-------|----------|----------|------|---------|-----|----|
| chrUn | 70600350 | 70604259 | 3910 | CarSat1 | red | na |
| chrUn | 70604283 | 70605001 | 719  | CarSat1 | red | na |
| chrUn | 70605025 | 70605757 | 733  | CarSat1 | red | na |
| chrUn | 70605782 | 70606488 | 707  | CarSat1 | red | na |
| chrUn | 70606512 | 70607289 | 778  | CarSat1 | red | na |
| chrUn | 70608319 | 70610751 | 2433 | CarSat1 | red | na |
| chrUn | 70610778 | 70611247 | 470  | CarSat1 | red | na |
| chrUn | 70611263 | 70611984 | 722  | CarSat1 | red | na |
| chrUn | 70612000 | 70612962 | 963  | CarSat1 | red | na |
| chrUn | 70612989 | 70614436 | 1448 | CarSat1 | red | na |
| chrUn | 70614463 | 70614922 | 460  | CarSat1 | red | na |
| chrUn | 70614948 | 70616647 | 1700 | CarSat1 | red | na |
| chrUn | 70616674 | 70617384 | 711  | CarSat1 | red | na |
| chrUn | 70617411 | 70618121 | 711  | CarSat1 | red | na |
| chrUn | 70618148 | 70619476 | 1329 | CarSat1 | red | na |
| chrUn | 70620514 | 70621718 | 1205 | CarSat1 | red | na |
| chrUn | 70621745 | 70622455 | 711  | CarSat1 | red | na |
| chrUn | 70622482 | 70625162 | 2681 | CarSat1 | red | na |
| chrUn | 70625178 | 70626636 | 1459 | CarSat1 | red | na |
| chrUn | 70626652 | 70629090 | 2439 | CarSat1 | red | na |
| chrUn | 70629117 | 70629827 | 711  | CarSat1 | red | na |
| chrUn | 70629854 | 70630314 | 461  | CarSat1 | red | na |
| chrUn | 70630339 | 70631660 | 1322 | CarSat1 | red | na |
| chrUn | 70633235 | 70634218 | 984  | CarSat1 | red | na |
| chrUn | 70634234 | 70635942 | 1709 | CarSat1 | red | na |
| chrUn | 70635967 | 70636679 | 713  | CarSat1 | red | na |
| chrUn | 70636706 | 70637422 | 717  | CarSat1 | red | na |
| chrUn | 70637443 | 70638649 | 1207 | CarSat1 | red | na |
| chrUn | 70638674 | 70640633 | 1960 | CarSat1 | red | na |
| chrUn | 70640670 | 70641108 | 439  | CarSat1 | red | na |
| chrUn | 70641129 | 70642324 | 1196 | CarSat1 | red | na |
| chrUn | 70642357 | 70643062 | 706  | CarSat1 | red | na |
| chrUn | 70643087 | 70643844 | 758  | CarSat1 | red | na |
| chrUn | 70663848 | 70664636 | 789  | CarSat1 | red | na |
| chrUn | 70664666 | 70665152 | 487  | CarSat1 | red | na |
| chrUn | 70665185 | 70666851 | 1667 | CarSat1 | red | na |
| chrUn | 70666881 | 70668318 | 1438 | CarSat1 | red | na |
| chrUn | 70668355 | 70669062 | 708  | CarSat1 | red | na |
| chrUn | 70669092 | 70670534 | 1443 | CarSat1 | red | na |
| chrUn | 70670564 | 70671539 | 976  | CarSat1 | red | na |
| chrUn | 70671560 | 70672742 | 1183 | CarSat1 | red | na |
| chrUn | 70672772 | 70674999 | 2228 | CarSat1 | red | na |

|       |          |          |      |         |        |    |
|-------|----------|----------|------|---------|--------|----|
| chrUn | 70675999 | 70678186 | 2188 | CarSat1 | red    | na |
| chrUn | 70678213 | 70679419 | 1207 | CarSat1 | red    | na |
| chrUn | 70679443 | 70679929 | 487  | CarSat1 | red    | na |
| chrUn | 70679959 | 70682617 | 2659 | CarSat1 | red    | na |
| chrUn | 70682638 | 70684085 | 1448 | CarSat1 | red    | na |
| chrUn | 70684112 | 70685105 | 994  | CarSat1 | red    | na |
| chrUn | 70685120 | 70685828 | 709  | CarSat1 | red    | na |
| chrUn | 70685858 | 70687122 | 1265 | CarSat1 | red    | na |
| chrUn | 70688133 | 70689534 | 1402 | CarSat1 | red    | na |
| chrUn | 70689550 | 70690019 | 470  | CarSat1 | red    | na |
| chrUn | 70690047 | 70690756 | 710  | CarSat1 | red    | na |
| chrUn | 70690783 | 70691494 | 712  | CarSat1 | red    | na |
| chrUn | 70691521 | 70692229 | 709  | CarSat1 | red    | na |
| chrUn | 70692256 | 70692967 | 712  | CarSat1 | red    | na |
| chrUn | 70692994 | 70693703 | 710  | CarSat1 | red    | na |
| chrUn | 70693732 | 70694693 | 962  | CarSat1 | red    | na |
| chrUn | 70694719 | 70699243 | 4525 | CarSat1 | red    | na |
| chrUn | 70700258 | 70702746 | 2489 | CarSat1 | red    | na |
| chrUn | 70702776 | 70703268 | 493  | CarSat1 | red    | na |
| chrUn | 70703284 | 70705470 | 2187 | CarSat1 | red    | na |
| chrUn | 70705494 | 70706434 | 941  | CarSat1 | red    | na |
| chrUn | 70706464 | 70707907 | 1444 | CarSat1 | red    | na |
| chrUn | 70707922 | 70708048 | 127  | Carsat2 | orange | na |
| chrUn | 70707937 | 70709160 | 1224 | CarSat1 | red    | na |
| chrUn | 70709184 | 70710123 | 940  | CarSat1 | red    | na |
| chrUn | 70710153 | 70711375 | 1223 | CarSat1 | red    | na |
| chrUn | 70756027 | 70758482 | 2456 | CarSat1 | red    | na |
| chrUn | 70758497 | 70759219 | 723  | CarSat1 | red    | na |
| chrUn | 70759234 | 70763856 | 4623 | CarSat1 | red    | na |
| chrUn | 70763881 | 70766318 | 2438 | CarSat1 | red    | na |
| chrUn | 70766344 | 70767140 | 797  | CarSat1 | red    | na |
| chrUn | 70781658 | 70782248 | 591  | SAT1_CF | blue   | na |
| chrUn | 70782327 | 70782652 | 326  | SAT1_CF | blue   | na |
| chrUn | 70786273 | 70787308 | 1036 | SAT1_CF | blue   | na |
| chrUn | 70787355 | 70789238 | 1884 | SAT1_CF | blue   | na |
| chrUn | 70789304 | 70789848 | 545  | SAT1_CF | blue   | na |
| chrUn | 70789884 | 70791980 | 2097 | SAT1_CF | blue   | na |
| chrUn | 70791993 | 70792495 | 503  | SAT1_CF | blue   | na |
| chrUn | 70792540 | 70792657 | 118  | SAT1_CF | blue   | na |
| chrUn | 70796775 | 70798430 | 1656 | SAT1_CF | blue   | na |
| chrUn | 70800413 | 70801315 | 903  | SAT1_CF | blue   | na |
| chrUn | 70801345 | 70802347 | 1003 | SAT1_CF | blue   | na |

|       |          |          |      |         |        |    |
|-------|----------|----------|------|---------|--------|----|
| chrUn | 70803390 | 70804025 | 636  | CarSat1 | red    | na |
| chrUn | 70804050 | 70805003 | 954  | CarSat1 | red    | na |
| chrUn | 70805030 | 70805740 | 711  | CarSat1 | red    | na |
| chrUn | 70805767 | 70808958 | 3192 | CarSat1 | red    | na |
| chrUn | 70808988 | 70811634 | 2647 | CarSat1 | red    | na |
| chrUn | 70811661 | 70812129 | 469  | CarSat1 | red    | na |
| chrUn | 70812154 | 70814463 | 2310 | CarSat1 | red    | na |
| chrUn | 70815482 | 70816194 | 713  | CarSat1 | red    | na |
| chrUn | 70816209 | 70816336 | 128  | Carsat2 | orange | na |
| chrUn | 70816224 | 70817452 | 1229 | CarSat1 | red    | na |
| chrUn | 70817468 | 70818918 | 1451 | CarSat1 | red    | na |
| chrUn | 70818942 | 70819667 | 726  | CarSat1 | red    | na |
| chrUn | 70819683 | 70821879 | 2197 | CarSat1 | red    | na |
| chrUn | 70821895 | 70823098 | 1204 | CarSat1 | red    | na |
| chrUn | 70823125 | 70824294 | 1170 | CarSat1 | red    | na |
| chrUn | 70824331 | 70825560 | 1230 | CarSat1 | red    | na |
| chrUn | 70825576 | 70826565 | 990  | CarSat1 | red    | na |
| chrUn | 70827576 | 70828473 | 898  | CarSat1 | red    | na |
| chrUn | 70828489 | 70829425 | 937  | CarSat1 | red    | na |
| chrUn | 70829455 | 70830433 | 979  | CarSat1 | red    | na |
| chrUn | 70830460 | 70831909 | 1450 | CarSat1 | red    | na |
| chrUn | 70831936 | 70832897 | 962  | CarSat1 | red    | na |
| chrUn | 70832913 | 70834119 | 1207 | CarSat1 | red    | na |
| chrUn | 70834146 | 70834857 | 712  | CarSat1 | red    | na |
| chrUn | 70834884 | 70835595 | 712  | CarSat1 | red    | na |
| chrUn | 70835617 | 70836330 | 714  | CarSat1 | red    | na |
| chrUn | 70836357 | 70837068 | 712  | CarSat1 | red    | na |
| chrUn | 70837095 | 70838669 | 1575 | CarSat1 | red    | na |
| chrUn | 70873664 | 70874746 | 1083 | CarSat1 | red    | na |
| chrUn | 70874771 | 70876219 | 1449 | CarSat1 | red    | na |
| chrUn | 70876244 | 70876945 | 702  | CarSat1 | red    | na |
| chrUn | 70876970 | 70878202 | 1233 | CarSat1 | red    | na |
| chrUn | 70878232 | 70879906 | 1675 | CarSat1 | red    | na |
| chrUn | 70879931 | 70881379 | 1449 | CarSat1 | red    | na |
| chrUn | 70881404 | 70882375 | 972  | CarSat1 | red    | na |
| chrUn | 70882419 | 70883575 | 1157 | CarSat1 | red    | na |
| chrUn | 70883608 | 70884697 | 1090 | CarSat1 | red    | na |
| chrUn | 70885791 | 70886707 | 917  | CarSat1 | red    | na |
| chrUn | 70886732 | 70889648 | 2917 | CarSat1 | red    | na |
| chrUn | 70889682 | 70891379 | 1698 | CarSat1 | red    | na |
| chrUn | 70891400 | 70891860 | 461  | CarSat1 | red    | na |
| chrUn | 70891885 | 70893341 | 1457 | CarSat1 | red    | na |

|       |          |          |      |         |        |    |
|-------|----------|----------|------|---------|--------|----|
| chrUn | 70893366 | 70896798 | 3433 | CarSat1 | red    | na |
| chrUn | 70909910 | 70910791 | 882  | CarSat1 | red    | na |
| chrUn | 70910816 | 70912750 | 1935 | CarSat1 | red    | na |
| chrUn | 70912777 | 70913949 | 1173 | CarSat1 | red    | na |
| chrUn | 70913964 | 70914091 | 128  | Carsat2 | orange | na |
| chrUn | 70913979 | 70915695 | 1717 | CarSat1 | red    | na |
| chrUn | 70915722 | 70916898 | 1177 | CarSat1 | red    | na |
| chrUn | 70916928 | 70917906 | 979  | CarSat1 | red    | na |
| chrUn | 70917933 | 70920117 | 2185 | CarSat1 | red    | na |
| chrUn | 70920144 | 70920967 | 824  | CarSat1 | red    | na |
| chrUn | 70921977 | 70923718 | 1742 | CarSat1 | red    | na |
| chrUn | 70923745 | 70925443 | 1699 | CarSat1 | red    | na |
| chrUn | 70925459 | 70925927 | 469  | CarSat1 | red    | na |
| chrUn | 70925954 | 70926661 | 708  | CarSat1 | red    | na |
| chrUn | 70926688 | 70928135 | 1448 | CarSat1 | red    | na |
| chrUn | 70928162 | 70928871 | 710  | CarSat1 | red    | na |
| chrUn | 70928898 | 70929861 | 964  | CarSat1 | red    | na |
| chrUn | 70929877 | 70929951 | 75   | CarSat1 | red    | na |
| chrUn | 70930140 | 70931536 | 1397 | CarSat1 | red    | na |
| chrUn | 70931552 | 70933010 | 1459 | CarSat1 | red    | na |
| chrUn | 70934022 | 70938290 | 4269 | CarSat1 | red    | na |
| chrUn | 70938306 | 70941477 | 3172 | CarSat1 | red    | na |
| chrUn | 70941504 | 70943450 | 1947 | CarSat1 | red    | na |
| chrUn | 70943466 | 70944427 | 962  | CarSat1 | red    | na |
| chrUn | 70944458 | 70945054 | 597  | CarSat1 | red    | na |
| chrUn | 70946487 | 70947152 | 666  | SAT1_CF | blue   | na |
| chrUn | 70947196 | 70947738 | 543  | SAT1_CF | blue   | na |
| chrUn | 70947835 | 70949126 | 1292 | SAT1_CF | blue   | na |
| chrUn | 70949139 | 70949641 | 503  | SAT1_CF | blue   | na |
| chrUn | 70949677 | 70950047 | 371  | SAT1_CF | blue   | na |
| chrUn | 70950090 | 70950977 | 888  | SAT1_CF | blue   | na |
| chrUn | 70950992 | 70951535 | 544  | SAT1_CF | blue   | na |
| chrUn | 70951577 | 70952428 | 852  | SAT1_CF | blue   | na |
| chrUn | 70952440 | 70953072 | 633  | SAT1_CF | blue   | na |
| chrUn | 70953129 | 70953463 | 335  | SAT1_CF | blue   | na |
| chrUn | 70953513 | 70954056 | 544  | SAT1_CF | blue   | na |
| chrUn | 70954099 | 70954961 | 863  | SAT1_CF | blue   | na |
| chrUn | 70954999 | 70955542 | 544  | SAT1_CF | blue   | na |
| chrUn | 70955584 | 70957007 | 1424 | SAT1_CF | blue   | na |
| chrUn | 70958100 | 70959432 | 1333 | CarSat1 | red    | na |
| chrUn | 70959448 | 70960902 | 1455 | CarSat1 | red    | na |
| chrUn | 70960927 | 70962592 | 1666 | CarSat1 | red    | na |

|       |          |          |      |         |        |    |
|-------|----------|----------|------|---------|--------|----|
| chrUn | 70962607 | 70962734 | 128  | Carsat2 | orange | na |
| chrUn | 70962622 | 70963601 | 980  | CarSat1 | red    | na |
| chrUn | 70963628 | 70964589 | 962  | CarSat1 | red    | na |
| chrUn | 70964605 | 70965811 | 1207 | CarSat1 | red    | na |
| chrUn | 70965838 | 70966549 | 712  | CarSat1 | red    | na |
| chrUn | 70966576 | 70967010 | 435  | CarSat1 | red    | na |
| chrUn | 70967047 | 70968053 | 1007 | CarSat1 | red    | na |
| chrUn | 70968080 | 70968520 | 441  | CarSat1 | red    | na |
| chrUn | 70968550 | 70969124 | 575  | CarSat1 | red    | na |
| chrUn | 70970132 | 70971011 | 880  | CarSat1 | red    | na |
| chrUn | 70971044 | 70971749 | 706  | CarSat1 | red    | na |
| chrUn | 70971776 | 70973492 | 1717 | CarSat1 | red    | na |
| chrUn | 70973522 | 70974459 | 938  | CarSat1 | red    | na |
| chrUn | 70974475 | 70975194 | 720  | CarSat1 | red    | na |
| chrUn | 70975210 | 70976171 | 962  | CarSat1 | red    | na |
| chrUn | 70976198 | 70978648 | 2451 | CarSat1 | red    | na |
| chrUn | 70978678 | 70980351 | 1674 | CarSat1 | red    | na |
| chrUn | 70980367 | 70981147 | 781  | CarSat1 | red    | na |
| chrUn | 70982191 | 70983115 | 925  | CarSat1 | red    | na |
| chrUn | 70983131 | 70984590 | 1460 | CarSat1 | red    | na |
| chrUn | 70984606 | 70985569 | 964  | CarSat1 | red    | na |
| chrUn | 70985596 | 70986305 | 710  | CarSat1 | red    | na |
| chrUn | 70986332 | 70986800 | 469  | CarSat1 | red    | na |
| chrUn | 70986816 | 70987537 | 722  | CarSat1 | red    | na |
| chrUn | 70987553 | 70988420 | 868  | CarSat1 | red    | na |
| chrUn | 70990063 | 70991281 | 1219 | CarSat1 | red    | na |
| chrUn | 70991308 | 70991777 | 470  | CarSat1 | red    | na |
| chrUn | 70991793 | 70993022 | 1230 | CarSat1 | red    | na |
| chrUn | 70993052 | 70994494 | 1443 | CarSat1 | red    | na |
| chrUn | 70994583 | 70994810 | 228  | CarSat1 | red    | na |
| chrUn | 70995818 | 70996698 | 881  | CarSat1 | red    | na |
| chrUn | 70996713 | 70996839 | 127  | Carsat2 | orange | na |
| chrUn | 70996728 | 70997435 | 708  | CarSat1 | red    | na |
| chrUn | 70997465 | 70998691 | 1227 | CarSat1 | red    | na |
| chrUn | 70998715 | 71000899 | 2185 | CarSat1 | red    | na |
| chrUn | 71000924 | 71002906 | 1983 | CarSat1 | red    | na |
| chrUn | 71002933 | 71003884 | 952  | CarSat1 | red    | na |
| chrUn | 71003910 | 71004378 | 469  | CarSat1 | red    | na |
| chrUn | 71004405 | 71005118 | 714  | CarSat1 | red    | na |
| chrUn | 71005143 | 71006318 | 1176 | CarSat1 | red    | na |
| chrUn | 71006348 | 71006822 | 475  | CarSat1 | red    | na |
| chrUn | 71034604 | 71036367 | 1764 | CarSat1 | red    | na |

|       |          |          |      |         |        |    |
|-------|----------|----------|------|---------|--------|----|
| chrUn | 71036388 | 71037103 | 716  | CarSat1 | red    | na |
| chrUn | 71037123 | 71039787 | 2665 | CarSat1 | red    | na |
| chrUn | 71039802 | 71039929 | 128  | Carsat2 | orange | na |
| chrUn | 71039817 | 71040525 | 709  | CarSat1 | red    | na |
| chrUn | 71040555 | 71041050 | 496  | CarSat1 | red    | na |
| chrUn | 71041075 | 71042730 | 1656 | CarSat1 | red    | na |
| chrUn | 71042767 | 71043989 | 1223 | CarSat1 | red    | na |
| chrUn | 71044014 | 71045552 | 1539 | CarSat1 | red    | na |
| chrUn | 71058591 | 71058907 | 317  | SAT1_CF | blue   | na |
| chrUn | 71058920 | 71059025 | 106  | SAT1_CF | blue   | na |
| chrUn | 71059048 | 71060006 | 959  | SAT1_CF | blue   | na |
| chrUn | 71060019 | 71060091 | 73   | SAT1_CF | blue   | na |
| chrUn | 71060113 | 71060664 | 552  | SAT1_CF | blue   | na |
| chrUn | 71060676 | 71061438 | 763  | SAT1_CF | blue   | na |
| chrUn | 71061456 | 71062050 | 595  | SAT1_CF | blue   | na |
| chrUn | 71062279 | 71062434 | 156  | SAT1_CF | blue   | na |
| chrUn | 71062460 | 71062978 | 519  | SAT1_CF | blue   | na |
| chrUn | 71062990 | 71064235 | 1246 | SAT1_CF | blue   | na |
| chrUn | 71064259 | 71064687 | 429  | SAT1_CF | blue   | na |
| chrUn | 71064705 | 71065225 | 521  | SAT1_CF | blue   | na |
| chrUn | 71065238 | 71065640 | 403  | SAT1_CF | blue   | na |
| chrUn | 71067702 | 71068862 | 1161 | SAT1_CF | blue   | na |
| chrUn | 71068883 | 71069403 | 521  | SAT1_CF | blue   | na |
| chrUn | 71069415 | 71070089 | 675  | SAT1_CF | blue   | na |
| chrUn | 71070131 | 71070763 | 633  | SAT1_CF | blue   | na |
| chrUn | 71070791 | 71071345 | 555  | SAT1_CF | blue   | na |
| chrUn | 71072536 | 71073870 | 1335 | CarSat1 | red    | na |
| chrUn | 71073900 | 71075811 | 1912 | CarSat1 | red    | na |
| chrUn | 71075838 | 71076298 | 461  | CarSat1 | red    | na |
| chrUn | 71076323 | 71077287 | 965  | CarSat1 | red    | na |
| chrUn | 71077314 | 71079293 | 1980 | CarSat1 | red    | na |
| chrUn | 71079320 | 71079780 | 461  | CarSat1 | red    | na |
| chrUn | 71079805 | 71080767 | 963  | CarSat1 | red    | na |
| chrUn | 71080794 | 71081254 | 461  | CarSat1 | red    | na |
| chrUn | 71081279 | 71081991 | 713  | CarSat1 | red    | na |
| chrUn | 71082016 | 71082728 | 713  | CarSat1 | red    | na |
| chrUn | 71082753 | 71083474 | 722  | CarSat1 | red    | na |
| chrUn | 71084549 | 71085134 | 586  | SAT1_CF | blue   | na |
| chrUn | 71085145 | 71085637 | 493  | SAT1_CF | blue   | na |
| chrUn | 71085651 | 71086864 | 1214 | SAT1_CF | blue   | na |
| chrUn | 71086875 | 71087364 | 490  | SAT1_CF | blue   | na |
| chrUn | 71087403 | 71088225 | 823  | SAT1_CF | blue   | na |



|       |          |          |              |        |    |
|-------|----------|----------|--------------|--------|----|
| chrUn | 71088240 | 71088397 | 158 SAT1_CF  | blue   | na |
| chrUn | 71088423 | 71088919 | 497 SAT1_CF  | blue   | na |
| chrUn | 71095162 | 71096190 | 1029 SAT1_CF | blue   | na |
| chrUn | 71096230 | 71096769 | 540 SAT1_CF  | blue   | na |
| chrUn | 71104904 | 71105917 | 1014 SAT1_CF | blue   | na |
| chrUn | 71105940 | 71106036 | 97 SAT1_CF   | blue   | na |
| chrUn | 71106060 | 71106329 | 270 SAT1_CF  | blue   | na |
| chrUn | 71107498 | 71108657 | 1160 SAT1_CF | blue   | na |
| chrUn | 71108721 | 71109203 | 483 SAT1_CF  | blue   | na |
| chrUn | 71109216 | 71109319 | 104 SAT1_CF  | blue   | na |
| chrUn | 71109345 | 71109898 | 554 SAT1_CF  | blue   | na |
| chrUn | 71109911 | 71110595 | 685 SAT1_CF  | blue   | na |
| chrUn | 71110615 | 71110921 | 307 SAT1_CF  | blue   | na |
| chrUn | 71125540 | 71126961 | 1422 CarSat1 | red    | na |
| chrUn | 71126976 | 71127899 | 924 CarSat1  | red    | na |
| chrUn | 71127932 | 71128432 | 501 CarSat1  | red    | na |
| chrUn | 71128447 | 71129173 | 727 CarSat1  | red    | na |
| chrUn | 71129188 | 71129911 | 724 CarSat1  | red    | na |
| chrUn | 71129926 | 71136468 | 6543 CarSat1 | red    | na |
| chrUn | 71137472 | 71137777 | 306 Sat2CF   | purple | na |
| chrUn | 71137496 | 71137818 | 323 Sat2CF   | purple | na |
| chrUn | 71152857 | 71153568 | 712 CarSat1  | red    | na |
| chrUn | 71153593 | 71157620 | 4028 CarSat1 | red    | na |
| chrUn | 71159003 | 71161052 | 2050 CarSat1 | red    | na |
| chrUn | 71161082 | 71161789 | 708 CarSat1  | red    | na |
| chrUn | 71161819 | 71163264 | 1446 CarSat1 | red    | na |
| chrUn | 71163294 | 71164272 | 979 CarSat1  | red    | na |
| chrUn | 71164299 | 71165100 | 802 CarSat1  | red    | na |
| chrUn | 71177995 | 71178366 | 372 CarSat1  | red    | na |
| chrUn | 71178552 | 71179600 | 1049 CarSat1 | red    | na |
| chrUn | 71179621 | 71180872 | 1252 CarSat1 | red    | na |
| chrUn | 71181589 | 71182927 | 1339 CarSat1 | red    | na |
| chrUn | 71182957 | 71183678 | 722 CarSat1  | red    | na |
| chrUn | 71183693 | 71184414 | 722 CarSat1  | red    | na |
| chrUn | 71184429 | 71185138 | 710 CarSat1  | red    | na |
| chrUn | 71185169 | 71185895 | 727 CarSat1  | red    | na |
| chrUn | 71185910 | 71186631 | 722 CarSat1  | red    | na |
| chrUn | 71186646 | 71187354 | 709 CarSat1  | red    | na |
| chrUn | 71187384 | 71187828 | 445 CarSat1  | red    | na |
| chrUn | 71187849 | 71188825 | 977 CarSat1  | red    | na |
| chrUn | 71189912 | 71191340 | 1429 CarSat1 | red    | na |
| chrUn | 71191361 | 71192339 | 979 CarSat1  | red    | na |

|       |          |          |       |         |        |    |
|-------|----------|----------|-------|---------|--------|----|
| chrUn | 71192369 | 71193095 | 727   | CarSat1 | red    | na |
| chrUn | 71193110 | 71193840 | 731   | CarSat1 | red    | na |
| chrUn | 71193855 | 71195299 | 1445  | CarSat1 | red    | na |
| chrUn | 71195329 | 71196772 | 1444  | CarSat1 | red    | na |
| chrUn | 71196806 | 71197507 | 702   | CarSat1 | red    | na |
| chrUn | 71197537 | 71198976 | 1440  | CarSat1 | red    | na |
| chrUn | 71199006 | 71200724 | 1719  | CarSat1 | red    | na |
| chrUn | 71225442 | 71227505 | 2064  | CarSat1 | red    | na |
| chrUn | 71227530 | 71228241 | 712   | CarSat1 | red    | na |
| chrUn | 71228266 | 71229705 | 1440  | CarSat1 | red    | na |
| chrUn | 71229739 | 71231187 | 1449  | CarSat1 | red    | na |
| chrUn | 71231212 | 71232902 | 1691  | CarSat1 | red    | na |
| chrUn | 71232923 | 71235602 | 2680  | CarSat1 | red    | na |
| chrUn | 71235627 | 71236287 | 661   | CarSat1 | red    | na |
| chrUn | 71237287 | 71238068 | 782   | CarSat1 | red    | na |
| chrUn | 71238083 | 71238209 | 127   | Carsat2 | orange | na |
| chrUn | 71238098 | 71238805 | 708   | CarSat1 | red    | na |
| chrUn | 71238835 | 71240549 | 1715  | CarSat1 | red    | na |
| chrUn | 71240570 | 71241531 | 962   | CarSat1 | red    | na |
| chrUn | 71241564 | 71242269 | 706   | CarSat1 | red    | na |
| chrUn | 71242302 | 71243226 | 925   | CarSat1 | red    | na |
| chrUn | 71243256 | 71243960 | 705   | CarSat1 | red    | na |
| chrUn | 71243990 | 71244700 | 711   | CarSat1 | red    | na |
| chrUn | 71244715 | 71244842 | 128   | Carsat2 | orange | na |
| chrUn | 71244730 | 71245709 | 980   | CarSat1 | red    | na |
| chrUn | 71245730 | 71246165 | 436   | CarSat1 | red    | na |
| chrUn | 71246190 | 71246318 | 129   | Carsat2 | orange | na |
| chrUn | 71246205 | 71248134 | 1930  | CarSat1 | red    | na |
| chrUn | 71249262 | 71259931 | 10670 | Carsat2 | orange | na |
| chrUn | 71261035 | 71261746 | 712   | CarSat1 | red    | na |
| chrUn | 71261773 | 71263566 | 1794  | CarSat1 | red    | na |
| chrUn | 71263748 | 71264898 | 1151  | CarSat1 | red    | na |
| chrUn | 71264925 | 71265889 | 965   | CarSat1 | red    | na |
| chrUn | 71265914 | 71266840 | 927   | CarSat1 | red    | na |
| chrUn | 71266855 | 71266983 | 129   | Carsat2 | orange | na |
| chrUn | 71266870 | 71268101 | 1232  | CarSat1 | red    | na |
| chrUn | 71268126 | 71269568 | 1443  | CarSat1 | red    | na |
| chrUn | 71269593 | 71270062 | 470   | CarSat1 | red    | na |
| chrUn | 71270089 | 71271791 | 1703  | CarSat1 | red    | na |
| chrUn | 71308437 | 71309360 | 924   | Sat2CF  | purple | na |
| chrUn | 71308500 | 71309309 | 810   | Sat2CF  | purple | na |
| chrUn | 71312090 | 71312901 | 812   | CarSat1 | red    | na |

|       |          |          |      |         |        |    |
|-------|----------|----------|------|---------|--------|----|
| chrUn | 71312931 | 71314375 | 1445 | CarSat1 | red    | na |
| chrUn | 71314405 | 71315113 | 709  | CarSat1 | red    | na |
| chrUn | 71315143 | 71315854 | 712  | CarSat1 | red    | na |
| chrUn | 71315869 | 71315996 | 128  | Carsat2 | orange | na |
| chrUn | 71315884 | 71317321 | 1438 | CarSat1 | red    | na |
| chrUn | 71317358 | 71321009 | 3652 | CarSat1 | red    | na |
| chrUn | 71321024 | 71321150 | 127  | Carsat2 | orange | na |
| chrUn | 71321039 | 71322883 | 1845 | CarSat1 | red    | na |
| chrUn | 71323894 | 71326388 | 2495 | SAT1_CF | blue   | na |
| chrUn | 71326403 | 71327107 | 705  | SAT1_CF | blue   | na |
| chrUn | 71327118 | 71327879 | 762  | SAT1_CF | blue   | na |
| chrUn | 71327891 | 71328574 | 684  | SAT1_CF | blue   | na |
| chrUn | 71328586 | 71329513 | 928  | SAT1_CF | blue   | na |
| chrUn | 71329526 | 71330172 | 647  | SAT1_CF | blue   | na |
| chrUn | 71330184 | 71331515 | 1332 | SAT1_CF | blue   | na |
| chrUn | 71331540 | 71331865 | 326  | SAT1_CF | blue   | na |
| chrUn | 71331932 | 71332865 | 934  | SAT1_CF | blue   | na |
| chrUn | 71332925 | 71333408 | 484  | SAT1_CF | blue   | na |
| chrUn | 71333431 | 71334094 | 664  | SAT1_CF | blue   | na |
| chrUn | 71334180 | 71334696 | 517  | SAT1_CF | blue   | na |
| chrUn | 71377236 | 71378119 | 884  | CarSat1 | red    | na |
| chrUn | 71378135 | 71379365 | 1231 | CarSat1 | red    | na |
| chrUn | 71379395 | 71380102 | 708  | CarSat1 | red    | na |
| chrUn | 71380132 | 71381797 | 1666 | CarSat1 | red    | na |
| chrUn | 71381822 | 71381946 | 125  | CarSat1 | red    | na |
| chrUn | 71382141 | 71383743 | 1603 | CarSat1 | red    | na |
| chrUn | 71383770 | 71384748 | 979  | CarSat1 | red    | na |
| chrUn | 71384778 | 71386447 | 1670 | CarSat1 | red    | na |
| chrUn | 71386463 | 71387181 | 719  | CarSat1 | red    | na |
| chrUn | 71387197 | 71387996 | 800  | CarSat1 | red    | na |
| chrUn | 71389022 | 71389545 | 524  | SAT1_CF | blue   | na |
| chrUn | 71389579 | 71391683 | 2105 | SAT1_CF | blue   | na |
| chrUn | 71391703 | 71392254 | 552  | SAT1_CF | blue   | na |
| chrUn | 71392327 | 71393011 | 685  | SAT1_CF | blue   | na |
| chrUn | 71393031 | 71393710 | 680  | SAT1_CF | blue   | na |
| chrUn | 71393723 | 71395977 | 2255 | SAT1_CF | blue   | na |
| chrUn | 71395998 | 71396107 | 110  | SAT1_CF | blue   | na |
| chrUn | 71396119 | 71396802 | 684  | SAT1_CF | blue   | na |
| chrUn | 71396816 | 71396990 | 175  | SAT1_CF | blue   | na |
| chrUn | 71397472 | 71397629 | 158  | SAT1_CF | blue   | na |
| chrUn | 71397657 | 71399869 | 2213 | SAT1_CF | blue   | na |
| chrUn | 71399899 | 71400213 | 315  | SAT1_CF | blue   | na |

|       |          |          |      |         |      |    |
|-------|----------|----------|------|---------|------|----|
| chrUn | 71413007 | 71413138 | 132  | CarSat1 | red  | na |
| chrUn | 71413327 | 71420091 | 6765 | CarSat1 | red  | na |
| chrUn | 71420134 | 71423753 | 3620 | CarSat1 | red  | na |
| chrUn | 71424889 | 71425410 | 522  | CarSat1 | red  | na |
| chrUn | 71425437 | 71426146 | 710  | CarSat1 | red  | na |
| chrUn | 71426173 | 71427379 | 1207 | CarSat1 | red  | na |
| chrUn | 71427395 | 71428112 | 718  | CarSat1 | red  | na |
| chrUn | 71428128 | 71428848 | 721  | CarSat1 | red  | na |
| chrUn | 71428864 | 71429576 | 713  | CarSat1 | red  | na |
| chrUn | 71429601 | 71431300 | 1700 | CarSat1 | red  | na |
| chrUn | 71431325 | 71432773 | 1449 | CarSat1 | red  | na |
| chrUn | 71432800 | 71433267 | 468  | CarSat1 | red  | na |
| chrUn | 71433283 | 71434244 | 962  | CarSat1 | red  | na |
| chrUn | 71434271 | 71435514 | 1244 | CarSat1 | red  | na |
| chrUn | 71437076 | 71438224 | 1149 | SAT1_CF | blue | na |
| chrUn | 71440519 | 71441363 | 845  | SAT1_CF | blue | na |
| chrUn | 71441406 | 71442078 | 673  | SAT1_CF | blue | na |
| chrUn | 71442091 | 71443410 | 1320 | SAT1_CF | blue | na |
| chrUn | 71443453 | 71444113 | 661  | SAT1_CF | blue | na |
| chrUn | 71444131 | 71444606 | 476  | SAT1_CF | blue | na |
| chrUn | 71444676 | 71445349 | 674  | SAT1_CF | blue | na |
| chrUn | 71445361 | 71445492 | 132  | SAT1_CF | blue | na |
| chrUn | 71446195 | 71447140 | 946  | SAT1_CF | blue | na |
| chrUn | 71447152 | 71447835 | 684  | SAT1_CF | blue | na |
| chrUn | 71447855 | 71448348 | 494  | SAT1_CF | blue | na |
| chrUn | 71448414 | 71448518 | 105  | SAT1_CF | blue | na |
| chrUn | 71451190 | 71451637 | 448  | SAT1_CF | blue | na |
| chrUn | 71451697 | 71452853 | 1157 | SAT1_CF | blue | na |
| chrUn | 71466208 | 71468861 | 2654 | CarSat1 | red  | na |
| chrUn | 71468888 | 71469598 | 711  | CarSat1 | red  | na |
| chrUn | 71469623 | 71472078 | 2456 | CarSat1 | red  | na |
| chrUn | 71472103 | 71472572 | 470  | CarSat1 | red  | na |
| chrUn | 71472599 | 71474046 | 1448 | CarSat1 | red  | na |
| chrUn | 71474073 | 71474783 | 711  | CarSat1 | red  | na |
| chrUn | 71474810 | 71475764 | 955  | CarSat1 | red  | na |
| chrUn | 71475789 | 71476258 | 470  | CarSat1 | red  | na |
| chrUn | 71476285 | 71476929 | 645  | CarSat1 | red  | na |
| chrUn | 71493198 | 71493919 | 722  | SAT1_CF | blue | na |
| chrUn | 71493937 | 71494821 | 885  | SAT1_CF | blue | na |
| chrUn | 71495895 | 71496374 | 480  | SAT1_CF | blue | na |
| chrUn | 71496417 | 71497094 | 678  | SAT1_CF | blue | na |
| chrUn | 71497106 | 71497687 | 582  | SAT1_CF | blue | na |

|       |          |          |              |      |    |
|-------|----------|----------|--------------|------|----|
| chrUn | 71497767 | 71499393 | 1627 SAT1_CF | blue | na |
| chrUn | 71499436 | 71500111 | 676 SAT1_CF  | blue | na |
| chrUn | 71500123 | 71500778 | 656 SAT1_CF  | blue | na |
| chrUn | 71500821 | 71501338 | 518 SAT1_CF  | blue | na |
| chrUn | 71501367 | 71502220 | 854 SAT1_CF  | blue | na |
| chrUn | 71502233 | 71502755 | 523 SAT1_CF  | blue | na |
| chrUn | 71502784 | 71503025 | 242 SAT1_CF  | blue | na |
| chrUn | 71504710 | 71505019 | 310 SAT1_CF  | blue | na |
| chrUn | 71505032 | 71505533 | 502 SAT1_CF  | blue | na |
| chrUn | 71505576 | 71506606 | 1031 SAT1_CF | blue | na |
| chrUn | 71519345 | 71520756 | 1412 CarSat1 | red  | na |
| chrUn | 71520772 | 71521493 | 722 CarSat1  | red  | na |
| chrUn | 71521509 | 71522230 | 722 CarSat1  | red  | na |
| chrUn | 71522246 | 71523708 | 1463 CarSat1 | red  | na |
| chrUn | 71523769 | 71525389 | 1621 CarSat1 | red  | na |
| chrUn | 71525405 | 71526126 | 722 CarSat1  | red  | na |
| chrUn | 71526142 | 71527104 | 963 CarSat1  | red  | na |
| chrUn | 71527131 | 71527841 | 711 CarSat1  | red  | na |
| chrUn | 71527868 | 71528337 | 470 CarSat1  | red  | na |
| chrUn | 71528353 | 71529073 | 721 CarSat1  | red  | na |
| chrUn | 71529089 | 71529982 | 894 CarSat1  | red  | na |
| chrUn | 71531068 | 71533036 | 1969 CarSat1 | red  | na |
| chrUn | 71533052 | 71533775 | 724 CarSat1  | red  | na |
| chrUn | 71533791 | 71534259 | 469 CarSat1  | red  | na |
| chrUn | 71534286 | 71534998 | 713 CarSat1  | red  | na |
| chrUn | 71535023 | 71535986 | 964 CarSat1  | red  | na |
| chrUn | 71536002 | 71537207 | 1206 CarSat1 | red  | na |
| chrUn | 71537232 | 71538933 | 1702 CarSat1 | red  | na |
| chrUn | 71538949 | 71539645 | 697 CarSat1  | red  | na |
| chrUn | 71539669 | 71540386 | 718 CarSat1  | red  | na |
| chrUn | 71540402 | 71541121 | 720 CarSat1  | red  | na |
| chrUn | 71541137 | 71541707 | 571 CarSat1  | red  | na |
| chrUn | 71542710 | 71543741 | 1032 CarSat1 | red  | na |
| chrUn | 71543768 | 71545954 | 2187 CarSat1 | red  | na |
| chrUn | 71545981 | 71546688 | 708 CarSat1  | red  | na |
| chrUn | 71546715 | 71547424 | 710 CarSat1  | red  | na |
| chrUn | 71547451 | 71548213 | 763 CarSat1  | red  | na |
| chrUn | 71548392 | 71549109 | 718 CarSat1  | red  | na |
| chrUn | 71549136 | 71552550 | 3415 CarSat1 | red  | na |
| chrUn | 71552566 | 71553384 | 819 CarSat1  | red  | na |
| chrUn | 71554393 | 71555451 | 1059 SAT1_CF | blue | na |
| chrUn | 71556729 | 71558506 | 1778 SAT1_CF | blue | na |

|       |          |          |              |      |    |
|-------|----------|----------|--------------|------|----|
| chrUn | 71558925 | 71559415 | 491 SAT1_CF  | blue | na |
| chrUn | 71559443 | 71560067 | 625 SAT1_CF  | blue | na |
| chrUn | 71560115 | 71560791 | 677 SAT1_CF  | blue | na |
| chrUn | 71560803 | 71561734 | 932 SAT1_CF  | blue | na |
| chrUn | 71561794 | 71562717 | 924 SAT1_CF  | blue | na |
| chrUn | 71562798 | 71563799 | 1002 SAT1_CF | blue | na |
| chrUn | 71564074 | 71564677 | 604 SAT1_CF  | blue | na |
| chrUn | 71564704 | 71565292 | 589 SAT1_CF  | blue | na |
| chrUn | 71565319 | 71565792 | 474 SAT1_CF  | blue | na |
| chrUn | 71565813 | 71565917 | 105 SAT1_CF  | blue | na |
| chrUn | 71565933 | 71566884 | 952 SAT1_CF  | blue | na |
| chrUn | 71567988 | 71568945 | 958 CarSat1  | red  | na |
| chrUn | 71568972 | 71570178 | 1207 CarSat1 | red  | na |
| chrUn | 71570203 | 71571896 | 1694 CarSat1 | red  | na |
| chrUn | 71571923 | 71573119 | 1197 CarSat1 | red  | na |
| chrUn | 71573144 | 71574109 | 966 CarSat1  | red  | na |
| chrUn | 71574130 | 71575575 | 1446 CarSat1 | red  | na |
| chrUn | 71575602 | 71576580 | 979 CarSat1  | red  | na |
| chrUn | 71576762 | 71577827 | 1066 CarSat1 | red  | na |
| chrUn | 71577852 | 71578562 | 711 CarSat1  | red  | na |
| chrUn | 71630876 | 71632239 | 1364 CarSat1 | red  | na |
| chrUn | 71632264 | 71633724 | 1461 CarSat1 | red  | na |
| chrUn | 71633749 | 71636178 | 2430 CarSat1 | red  | na |
| chrUn | 71636205 | 71636915 | 711 CarSat1  | red  | na |
| chrUn | 71636942 | 71639873 | 2932 CarSat1 | red  | na |
| chrUn | 71639894 | 71641463 | 1570 CarSat1 | red  | na |
| chrUn | 71654124 | 71655036 | 913 CarSat1  | red  | na |
| chrUn | 71655063 | 71655771 | 709 CarSat1  | red  | na |
| chrUn | 71655798 | 71656509 | 712 CarSat1  | red  | na |
| chrUn | 71656536 | 71660193 | 3658 CarSat1 | red  | na |
| chrUn | 71660220 | 71662405 | 2186 CarSat1 | red  | na |
| chrUn | 71662426 | 71664592 | 2167 CarSat1 | red  | na |
| chrUn | 71665769 | 71666646 | 878 CarSat1  | red  | na |
| chrUn | 71666673 | 71667274 | 602 CarSat1  | red  | na |
| chrUn | 71667289 | 71668211 | 923 CarSat1  | red  | na |
| chrUn | 71668238 | 71668709 | 472 CarSat1  | red  | na |
| chrUn | 71668734 | 71670916 | 2183 CarSat1 | red  | na |
| chrUn | 71670941 | 71672334 | 1394 CarSat1 | red  | na |
| chrUn | 71672526 | 71673930 | 1405 CarSat1 | red  | na |
| chrUn | 71673963 | 71674860 | 898 CarSat1  | red  | na |
| chrUn | 71674876 | 71676325 | 1450 CarSat1 | red  | na |
| chrUn | 71677331 | 71678509 | 1179 CarSat1 | red  | na |

|       |          |          |      |         |        |    |
|-------|----------|----------|------|---------|--------|----|
| chrUn | 71678702 | 71678718 | 17   | CarSat1 | red    | na |
| chrUn | 71683918 | 71689282 | 5365 | CarSat1 | red    | na |
| chrUn | 71689309 | 71690139 | 831  | CarSat1 | red    | na |
| chrUn | 71691060 | 71692338 | 1279 | CarSat1 | red    | na |
| chrUn | 71694009 | 71694877 | 869  | CarSat1 | red    | na |
| chrUn | 71694901 | 71695620 | 720  | CarSat1 | red    | na |
| chrUn | 71696739 | 71697456 | 718  | CarSat1 | red    | na |
| chrUn | 71697477 | 71698188 | 712  | CarSat1 | red    | na |
| chrUn | 71698215 | 71702965 | 4751 | CarSat1 | red    | na |
| chrUn | 71702981 | 71703703 | 723  | CarSat1 | red    | na |
| chrUn | 71703719 | 71704188 | 470  | CarSat1 | red    | na |
| chrUn | 71704215 | 71707229 | 3015 | CarSat1 | red    | na |
| chrUn | 71726695 | 71732153 | 5459 | CarSat1 | red    | na |
| chrUn | 71732180 | 71733590 | 1411 | CarSat1 | red    | na |
| chrUn | 71733617 | 71735061 | 1445 | CarSat1 | red    | na |
| chrUn | 71735088 | 71735798 | 711  | CarSat1 | red    | na |
| chrUn | 71735825 | 71736535 | 711  | CarSat1 | red    | na |
| chrUn | 71736560 | 71737255 | 696  | CarSat1 | red    | na |
| chrUn | 71738256 | 71740001 | 1746 | CarSat1 | red    | na |
| chrUn | 71740026 | 71741480 | 1455 | CarSat1 | red    | na |
| chrUn | 71741505 | 71742227 | 723  | CarSat1 | red    | na |
| chrUn | 71742252 | 71743201 | 950  | CarSat1 | red    | na |
| chrUn | 71743228 | 71745414 | 2187 | CarSat1 | red    | na |
| chrUn | 71745441 | 71748111 | 2671 | CarSat1 | red    | na |
| chrUn | 71748136 | 71748790 | 655  | CarSat1 | red    | na |
| chrUn | 71765118 | 71767987 | 2870 | CarSat1 | red    | na |
| chrUn | 71768012 | 71768946 | 935  | CarSat1 | red    | na |
| chrUn | 71768961 | 71769088 | 128  | Carsat2 | orange | na |
| chrUn | 71768976 | 71769684 | 709  | CarSat1 | red    | na |
| chrUn | 71769714 | 71769775 | 62   | CarSat1 | red    | na |
| chrUn | 71769964 | 71770903 | 940  | CarSat1 | red    | na |
| chrUn | 71770930 | 71772107 | 1178 | CarSat1 | red    | na |
| chrUn | 71772137 | 71775649 | 3513 | CarSat1 | red    | na |
| chrUn | 71796758 | 71797039 | 282  | Sat15CF | na     | na |
| chrUn | 71796758 | 71797039 | 282  | Sat15CF | na     | na |
| chrUn | 71797131 | 71797523 | 393  | Sat15CF | na     | na |
| chrUn | 71797131 | 71797523 | 393  | Sat15CF | na     | na |
| chrUn | 71800899 | 71801521 | 623  | CarSat1 | red    | na |
| chrUn | 71801548 | 71803734 | 2187 | CarSat1 | red    | na |
| chrUn | 71803761 | 71805210 | 1450 | CarSat1 | red    | na |
| chrUn | 71805237 | 71806683 | 1447 | CarSat1 | red    | na |
| chrUn | 71806710 | 71808899 | 2190 | CarSat1 | red    | na |

|       |          |          |      |         |     |    |
|-------|----------|----------|------|---------|-----|----|
| chrUn | 71808920 | 71809629 | 710  | CarSat1 | red | na |
| chrUn | 71809656 | 71811434 | 1779 | CarSat1 | red | na |
| chrUn | 71812452 | 71812943 | 492  | CarSat1 | red | na |
| chrUn | 71812973 | 71815148 | 2176 | CarSat1 | red | na |
| chrUn | 71815182 | 71815883 | 702  | CarSat1 | red | na |
| chrUn | 71815913 | 71816350 | 438  | CarSat1 | red | na |
| chrUn | 71816371 | 71817349 | 979  | CarSat1 | red | na |
| chrUn | 71817379 | 71818083 | 705  | CarSat1 | red | na |
| chrUn | 71818117 | 71818818 | 702  | CarSat1 | red | na |
| chrUn | 71818852 | 71819553 | 702  | CarSat1 | red | na |
| chrUn | 71819583 | 71821252 | 1670 | CarSat1 | red | na |
| chrUn | 71821269 | 71822962 | 1694 | CarSat1 | red | na |
| chrUn | 71823976 | 71827283 | 3308 | CarSat1 | red | na |
| chrUn | 71827310 | 71828019 | 710  | CarSat1 | red | na |
| chrUn | 71828046 | 71829008 | 963  | CarSat1 | red | na |
| chrUn | 71829024 | 71829493 | 470  | CarSat1 | red | na |
| chrUn | 71829520 | 71830481 | 962  | CarSat1 | red | na |
| chrUn | 71830497 | 71832689 | 2193 | CarSat1 | red | na |
| chrUn | 71832705 | 71833174 | 470  | CarSat1 | red | na |
| chrUn | 71833201 | 71834499 | 1299 | CarSat1 | red | na |
| chrUn | 71835501 | 71838094 | 2594 | CarSat1 | red | na |
| chrUn | 71838124 | 71841047 | 2924 | CarSat1 | red | na |
| chrUn | 71841077 | 71843990 | 2914 | CarSat1 | red | na |
| chrUn | 71844020 | 71845483 | 1464 | CarSat1 | red | na |
| chrUn | 71845498 | 71846020 | 523  | CarSat1 | red | na |
| chrUn | 71847077 | 71847853 | 777  | CarSat1 | red | na |
| chrUn | 71847917 | 71848823 | 907  | CarSat1 | red | na |
| chrUn | 71848844 | 71850623 | 1780 | CarSat1 | red | na |
| chrUn | 71850653 | 71852098 | 1446 | CarSat1 | red | na |
| chrUn | 71852128 | 71853062 | 935  | CarSat1 | red | na |
| chrUn | 71853078 | 71853799 | 722  | CarSat1 | red | na |
| chrUn | 71853815 | 71854777 | 963  | CarSat1 | red | na |
| chrUn | 71854804 | 71855509 | 706  | CarSat1 | red | na |
| chrUn | 71855536 | 71856005 | 470  | CarSat1 | red | na |
| chrUn | 71856021 | 71856984 | 964  | CarSat1 | red | na |
| chrUn | 71857011 | 71857528 | 518  | CarSat1 | red | na |
| chrUn | 71858548 | 71859063 | 516  | CarSat1 | red | na |
| chrUn | 71859094 | 71859806 | 713  | CarSat1 | red | na |
| chrUn | 71859828 | 71862502 | 2675 | CarSat1 | red | na |
| chrUn | 71862518 | 71863239 | 722  | CarSat1 | red | na |
| chrUn | 71863255 | 71865698 | 2444 | CarSat1 | red | na |
| chrUn | 71865719 | 71866926 | 1208 | CarSat1 | red | na |



|       |          |          |      |         |        |    |
|-------|----------|----------|------|---------|--------|----|
| chrUn | 71866951 | 71869053 | 2103 | CarSat1 | red    | na |
| chrUn | 71887025 | 71888332 | 1308 | CarSat1 | red    | na |
| chrUn | 71888347 | 71888473 | 127  | Carsat2 | orange | na |
| chrUn | 71888362 | 71889069 | 708  | CarSat1 | red    | na |
| chrUn | 71889099 | 71889806 | 708  | CarSat1 | red    | na |
| chrUn | 71889836 | 71890542 | 707  | CarSat1 | red    | na |
| chrUn | 71890557 | 71890684 | 128  | Carsat2 | orange | na |
| chrUn | 71890572 | 71892015 | 1444 | CarSat1 | red    | na |
| chrUn | 71892030 | 71892157 | 128  | Carsat2 | orange | na |
| chrUn | 71892045 | 71892752 | 708  | CarSat1 | red    | na |
| chrUn | 71892767 | 71892893 | 127  | Carsat2 | orange | na |
| chrUn | 71892782 | 71893489 | 708  | CarSat1 | red    | na |
| chrUn | 71893504 | 71893631 | 128  | Carsat2 | orange | na |
| chrUn | 71893519 | 71894225 | 707  | CarSat1 | red    | na |
| chrUn | 71894255 | 71895699 | 1445 | CarSat1 | red    | na |
| chrUn | 71895729 | 71896436 | 708  | CarSat1 | red    | na |
| chrUn | 71896451 | 71896578 | 128  | Carsat2 | orange | na |
| chrUn | 71896466 | 71897507 | 1042 | CarSat1 | red    | na |
| chrUn | 71898547 | 71899500 | 954  | CarSat1 | red    | na |
| chrUn | 71899521 | 71900235 | 715  | CarSat1 | red    | na |
| chrUn | 71900256 | 71903181 | 2926 | CarSat1 | red    | na |
| chrUn | 71903208 | 71903922 | 715  | CarSat1 | red    | na |
| chrUn | 71903961 | 71905746 | 1786 | CarSat1 | red    | na |
| chrUn | 71905776 | 71906236 | 461  | CarSat1 | red    | na |
| chrUn | 71906261 | 71906981 | 721  | CarSat1 | red    | na |
| chrUn | 71906997 | 71908695 | 1699 | CarSat1 | red    | na |
| chrUn | 71921540 | 71922451 | 912  | CarSat1 | red    | na |
| chrUn | 71922481 | 71923568 | 1088 | CarSat1 | red    | na |
| chrUn | 71925351 | 71926576 | 1226 | CarSat1 | red    | na |
| chrUn | 71926642 | 71927300 | 659  | CarSat1 | red    | na |
| chrUn | 71927316 | 71929257 | 1942 | CarSat1 | red    | na |
| chrUn | 71929284 | 71930132 | 849  | CarSat1 | red    | na |
| chrUn | 71931061 | 71932010 | 950  | CarSat1 | red    | na |
| chrUn | 71934706 | 71935934 | 1229 | CarSat1 | red    | na |
| chrUn | 71937994 | 71939437 | 1444 | CarSat1 | red    | na |
| chrUn | 71940441 | 71941583 | 1143 | CarSat1 | red    | na |
| chrUn | 71941598 | 71941725 | 128  | Carsat2 | orange | na |
| chrUn | 71941613 | 71943056 | 1444 | CarSat1 | red    | na |
| chrUn | 71943086 | 71945271 | 2186 | CarSat1 | red    | na |
| chrUn | 71945301 | 71946012 | 712  | CarSat1 | red    | na |
| chrUn | 71946042 | 71946751 | 710  | CarSat1 | red    | na |
| chrUn | 71946766 | 71946893 | 128  | Carsat2 | orange | na |

|       |          |          |      |         |        |    |
|-------|----------|----------|------|---------|--------|----|
| chrUn | 71946781 | 71947493 | 713  | CarSat1 | red    | na |
| chrUn | 71947508 | 71947622 | 115  | Carsat2 | orange | na |
| chrUn | 71947523 | 71948235 | 713  | CarSat1 | red    | na |
| chrUn | 71948265 | 71948972 | 708  | CarSat1 | red    | na |
| chrUn | 71948987 | 71949113 | 127  | Carsat2 | orange | na |
| chrUn | 71949002 | 71949712 | 711  | CarSat1 | red    | na |
| chrUn | 71949727 | 71949853 | 127  | Carsat2 | orange | na |
| chrUn | 71949742 | 71950888 | 1147 | CarSat1 | red    | na |
| chrUn | 71971513 | 71972310 | 798  | CarSat1 | red    | na |
| chrUn | 71972340 | 71973044 | 705  | CarSat1 | red    | na |
| chrUn | 71973074 | 71973778 | 705  | CarSat1 | red    | na |
| chrUn | 71973812 | 71974513 | 702  | CarSat1 | red    | na |
| chrUn | 71974547 | 71975982 | 1436 | CarSat1 | red    | na |
| chrUn | 71976012 | 71976715 | 704  | CarSat1 | red    | na |
| chrUn | 71976745 | 71978418 | 1674 | CarSat1 | red    | na |
| chrUn | 71978434 | 71980400 | 1967 | CarSat1 | red    | na |
| chrUn | 71980428 | 71981150 | 723  | CarSat1 | red    | na |
| chrUn | 71981166 | 71981947 | 782  | CarSat1 | red    | na |
| chrUn | 71982989 | 71983991 | 1003 | CarSat1 | red    | na |
| chrUn | 71984028 | 71985245 | 1218 | CarSat1 | red    | na |
| chrUn | 71985278 | 71986947 | 1670 | CarSat1 | red    | na |
| chrUn | 71986977 | 71989898 | 2922 | CarSat1 | red    | na |
| chrUn | 71989928 | 71992108 | 2181 | CarSat1 | red    | na |
| chrUn | 71992138 | 71992843 | 706  | CarSat1 | red    | na |
| chrUn | 71992873 | 71993359 | 487  | CarSat1 | red    | na |
| chrUn | 71994465 | 71995404 | 940  | CarSat1 | red    | na |
| chrUn | 71995429 | 71996636 | 1208 | CarSat1 | red    | na |
| chrUn | 71996663 | 71997624 | 962  | CarSat1 | red    | na |
| chrUn | 71997640 | 71998361 | 722  | CarSat1 | red    | na |
| chrUn | 71998386 | 71999834 | 1449 | CarSat1 | red    | na |
| chrUn | 71999850 | 72002044 | 2195 | CarSat1 | red    | na |
| chrUn | 72002060 | 72004814 | 2755 | CarSat1 | red    | na |
| chrUn | 72020452 | 72020666 | 215  | SAT1_CF | blue   | na |
| chrUn | 72020680 | 72021861 | 1182 | SAT1_CF | blue   | na |
| chrUn | 72021904 | 72022565 | 662  | SAT1_CF | blue   | na |
| chrUn | 72022578 | 72023080 | 503  | SAT1_CF | blue   | na |
| chrUn | 72023123 | 72023691 | 569  | SAT1_CF | blue   | na |
| chrUn | 72023714 | 72024394 | 681  | SAT1_CF | blue   | na |
| chrUn | 72024406 | 72025779 | 1374 | SAT1_CF | blue   | na |
| chrUn | 72025822 | 72026681 | 860  | SAT1_CF | blue   | na |
| chrUn | 72026693 | 72027208 | 516  | SAT1_CF | blue   | na |
| chrUn | 72027227 | 72028062 | 836  | SAT1_CF | blue   | na |

|       |          |          |              |      |    |
|-------|----------|----------|--------------|------|----|
| chrUn | 72028089 | 72028653 | 565 SAT1_CF  | blue | na |
| chrUn | 72028695 | 72029239 | 545 SAT1_CF  | blue | na |
| chrUn | 72029282 | 72029949 | 668 SAT1_CF  | blue | na |
| chrUn | 72029967 | 72030879 | 913 SAT1_CF  | blue | na |
| chrUn | 72031879 | 72032605 | 727 CarSat1  | red  | na |
| chrUn | 72032638 | 72033835 | 1198 CarSat1 | red  | na |
| chrUn | 72033847 | 72034348 | 502 CarSat1  | red  | na |
| chrUn | 72034363 | 72035068 | 706 CarSat1  | red  | na |
| chrUn | 72035101 | 72035822 | 722 CarSat1  | red  | na |
| chrUn | 72035837 | 72036763 | 927 CarSat1  | red  | na |
| chrUn | 72036788 | 72038973 | 2186 CarSat1 | red  | na |
| chrUn | 72038999 | 72039719 | 721 CarSat1  | red  | na |
| chrUn | 72039743 | 72040456 | 714 CarSat1  | red  | na |
| chrUn | 72040472 | 72041700 | 1229 CarSat1 | red  | na |
| chrUn | 72041730 | 72042292 | 563 CarSat1  | red  | na |
| chrUn | 72043297 | 72044457 | 1161 CarSat1 | red  | na |
| chrUn | 72044473 | 72045194 | 722 CarSat1  | red  | na |
| chrUn | 72045210 | 72046664 | 1455 CarSat1 | red  | na |
| chrUn | 72046680 | 72047647 | 968 CarSat1  | red  | na |
| chrUn | 72047692 | 72048866 | 1175 CarSat1 | red  | na |
| chrUn | 72048891 | 72049602 | 712 CarSat1  | red  | na |
| chrUn | 72049627 | 72052559 | 2933 CarSat1 | red  | na |
| chrUn | 72052575 | 72053668 | 1094 CarSat1 | red  | na |
| chrUn | 72054718 | 72058208 | 3491 CarSat1 | red  | na |
| chrUn | 72058235 | 72059936 | 1702 CarSat1 | red  | na |
| chrUn | 72059961 | 72061157 | 1197 CarSat1 | red  | na |
| chrUn | 72061184 | 72065092 | 3909 CarSat1 | red  | na |
| chrUn | 72073037 | 72073860 | 824 Sat29CF  | na   | na |
| chrUn | 72073652 | 72073886 | 235 Sat29CF  | na   | na |
| chrUn | 72095223 | 72096536 | 1314 CarSat1 | red  | na |
| chrUn | 72096557 | 72097533 | 977 CarSat1  | red  | na |
| chrUn | 72097563 | 72099744 | 2182 CarSat1 | red  | na |
| chrUn | 72099759 | 72100485 | 727 CarSat1  | red  | na |
| chrUn | 72100500 | 72101675 | 1176 CarSat1 | red  | na |
| chrUn | 72101701 | 72102679 | 979 CarSat1  | red  | na |
| chrUn | 72102709 | 72104368 | 1660 CarSat1 | red  | na |
| chrUn | 72104401 | 72105622 | 1222 CarSat1 | red  | na |
| chrUn | 72106655 | 72107521 | 867 CarSat1  | red  | na |
| chrUn | 72107542 | 72108466 | 925 CarSat1  | red  | na |
| chrUn | 72108491 | 72109940 | 1450 CarSat1 | red  | na |
| chrUn | 72109965 | 72111413 | 1449 CarSat1 | red  | na |
| chrUn | 72111438 | 72112675 | 1238 CarSat1 | red  | na |

|       |          |          |      |         |      |    |
|-------|----------|----------|------|---------|------|----|
| chrUn | 72112690 | 72116082 | 3393 | CarSat1 | red  | na |
| chrUn | 72116103 | 72117013 | 911  | CarSat1 | red  | na |
| chrUn | 72158590 | 72160494 | 1905 | CarSat1 | red  | na |
| chrUn | 72160515 | 72161230 | 716  | CarSat1 | red  | na |
| chrUn | 72161251 | 72164424 | 3174 | CarSat1 | red  | na |
| chrUn | 72164458 | 72167380 | 2923 | CarSat1 | red  | na |
| chrUn | 72167405 | 72168108 | 704  | CarSat1 | red  | na |
| chrUn | 72168133 | 72168945 | 813  | CarSat1 | red  | na |
| chrUn | 72194704 | 72195045 | 342  | SAT1_CF | blue | na |
| chrUn | 72195124 | 72196668 | 1545 | SAT1_CF | blue | na |
| chrUn | 72196680 | 72197841 | 1162 | SAT1_CF | blue | na |
| chrUn | 72197880 | 72200596 | 2717 | SAT1_CF | blue | na |
| chrUn | 72200608 | 72201803 | 1196 | SAT1_CF | blue | na |
| chrUn | 72201837 | 72201955 | 119  | SAT1_CF | blue | na |
| chrUn | 72202055 | 72202542 | 488  | SAT1_CF | blue | na |
| chrUn | 72202585 | 72203036 | 452  | SAT1_CF | blue | na |
| chrUn | 72204049 | 72206499 | 2451 | CarSat1 | red  | na |
| chrUn | 72206526 | 72207235 | 710  | CarSat1 | red  | na |
| chrUn | 72207256 | 72207972 | 717  | CarSat1 | red  | na |
| chrUn | 72207993 | 72210920 | 2928 | CarSat1 | red  | na |
| chrUn | 72210947 | 72211658 | 712  | CarSat1 | red  | na |
| chrUn | 72211685 | 72212393 | 709  | CarSat1 | red  | na |
| chrUn | 72212420 | 72213867 | 1448 | CarSat1 | red  | na |
| chrUn | 72213894 | 72214407 | 514  | CarSat1 | red  | na |
| chrUn | 72228855 | 72229909 | 1055 | CarSat1 | red  | na |
| chrUn | 72229924 | 72230649 | 726  | CarSat1 | red  | na |
| chrUn | 72230664 | 72231385 | 722  | CarSat1 | red  | na |
| chrUn | 72231400 | 72232120 | 721  | CarSat1 | red  | na |
| chrUn | 72232135 | 72232855 | 721  | CarSat1 | red  | na |
| chrUn | 72232870 | 72233574 | 705  | CarSat1 | red  | na |
| chrUn | 72233604 | 72234326 | 723  | CarSat1 | red  | na |
| chrUn | 72234341 | 72235065 | 725  | CarSat1 | red  | na |
| chrUn | 72235080 | 72235785 | 706  | CarSat1 | red  | na |
| chrUn | 72235815 | 72236537 | 723  | CarSat1 | red  | na |
| chrUn | 72236552 | 72237275 | 724  | CarSat1 | red  | na |
| chrUn | 72237290 | 72237998 | 709  | CarSat1 | red  | na |
| chrUn | 72238028 | 72238739 | 712  | CarSat1 | red  | na |
| chrUn | 72238769 | 72239209 | 441  | CarSat1 | red  | na |
| chrUn | 72240230 | 72241204 | 975  | SAT1_CF | blue | na |
| chrUn | 72241249 | 72241922 | 674  | SAT1_CF | blue | na |
| chrUn | 72241936 | 72242490 | 555  | SAT1_CF | blue | na |
| chrUn | 72242513 | 72242619 | 107  | SAT1_CF | blue | na |

|       |          |          |              |      |    |
|-------|----------|----------|--------------|------|----|
| chrUn | 72242631 | 72243133 | 503 SAT1_CF  | blue | na |
| chrUn | 72243176 | 72244096 | 921 SAT1_CF  | blue | na |
| chrUn | 72244140 | 72245137 | 998 SAT1_CF  | blue | na |
| chrUn | 72245180 | 72245845 | 666 SAT1_CF  | blue | na |
| chrUn | 72245865 | 72246413 | 549 SAT1_CF  | blue | na |
| chrUn | 72246426 | 72247317 | 892 SAT1_CF  | blue | na |
| chrUn | 72247329 | 72249732 | 2404 SAT1_CF | blue | na |
| chrUn | 72249775 | 72250560 | 786 SAT1_CF  | blue | na |
| chrUn | 72251598 | 72254042 | 2445 CarSat1 | red  | na |
| chrUn | 72254072 | 72255248 | 1177 CarSat1 | red  | na |
| chrUn | 72255275 | 72255986 | 712 CarSat1  | red  | na |
| chrUn | 72256007 | 72258190 | 2184 CarSat1 | red  | na |
| chrUn | 72258211 | 72258925 | 715 CarSat1  | red  | na |
| chrUn | 72258946 | 72261130 | 2185 CarSat1 | red  | na |
| chrUn | 72261151 | 72261898 | 748 CarSat1  | red  | na |
| chrUn | 72262905 | 72263803 | 899 CarSat1  | red  | na |
| chrUn | 72263819 | 72265049 | 1231 CarSat1 | red  | na |
| chrUn | 72265079 | 72266989 | 1911 CarSat1 | red  | na |
| chrUn | 72267016 | 72267995 | 980 CarSat1  | red  | na |
| chrUn | 72268025 | 72269201 | 1177 CarSat1 | red  | na |
| chrUn | 72269228 | 72269939 | 712 CarSat1  | red  | na |
| chrUn | 72269966 | 72271413 | 1448 CarSat1 | red  | na |
| chrUn | 72271440 | 72272645 | 1206 CarSat1 | red  | na |
| chrUn | 72272660 | 72273236 | 577 CarSat1  | red  | na |
| chrUn | 72274258 | 72275170 | 913 CarSat1  | red  | na |
| chrUn | 72275197 | 72276641 | 1445 CarSat1 | red  | na |
| chrUn | 72276668 | 72277379 | 712 CarSat1  | red  | na |
| chrUn | 72277406 | 72278588 | 1183 CarSat1 | red  | na |
| chrUn | 72278617 | 72279846 | 1230 CarSat1 | red  | na |
| chrUn | 72279862 | 72282271 | 2410 CarSat1 | red  | na |
| chrUn | 72282308 | 72284564 | 2257 CarSat1 | red  | na |
| chrUn | 72296928 | 72298617 | 1690 CarSat1 | red  | na |
| chrUn | 72298644 | 72299638 | 995 CarSat1  | red  | na |
| chrUn | 72299653 | 72300375 | 723 CarSat1  | red  | na |
| chrUn | 72300390 | 72301110 | 721 CarSat1  | red  | na |
| chrUn | 72301125 | 72301563 | 439 CarSat1  | red  | na |
| chrUn | 72301590 | 72302584 | 995 CarSat1  | red  | na |
| chrUn | 72302599 | 72304063 | 1465 CarSat1 | red  | na |
| chrUn | 72304078 | 72304798 | 721 CarSat1  | red  | na |
| chrUn | 72304813 | 72305533 | 721 CarSat1  | red  | na |
| chrUn | 72305548 | 72306268 | 721 CarSat1  | red  | na |
| chrUn | 72306283 | 72307217 | 935 CarSat1  | red  | na |

|       |          |          |      |         |      |    |
|-------|----------|----------|------|---------|------|----|
| chrUn | 72311541 | 72313593 | 2053 | CarSat1 | red  | na |
| chrUn | 72313623 | 72314602 | 980  | CarSat1 | red  | na |
| chrUn | 72314629 | 72315069 | 441  | CarSat1 | red  | na |
| chrUn | 72315100 | 72316079 | 980  | CarSat1 | red  | na |
| chrUn | 72316106 | 72316546 | 441  | CarSat1 | red  | na |
| chrUn | 72316576 | 72317555 | 980  | CarSat1 | red  | na |
| chrUn | 72317582 | 72318533 | 952  | CarSat1 | red  | na |
| chrUn | 72332984 | 72333600 | 617  | CarSat1 | red  | na |
| chrUn | 72333615 | 72334342 | 728  | CarSat1 | red  | na |
| chrUn | 72334357 | 72337407 | 3051 | CarSat1 | red  | na |
| chrUn | 72337437 | 72338159 | 723  | CarSat1 | red  | na |
| chrUn | 72338174 | 72339632 | 1459 | CarSat1 | red  | na |
| chrUn | 72339647 | 72340821 | 1175 | CarSat1 | red  | na |
| chrUn | 72340850 | 72341847 | 998  | CarSat1 | red  | na |
| chrUn | 72341862 | 72343287 | 1426 | CarSat1 | red  | na |
| chrUn | 72344303 | 72345384 | 1082 | CarSat1 | red  | na |
| chrUn | 72345409 | 72346112 | 704  | CarSat1 | red  | na |
| chrUn | 72346137 | 72347390 | 1254 | CarSat1 | red  | na |
| chrUn | 72347405 | 72350304 | 2900 | CarSat1 | red  | na |
| chrUn | 72350329 | 72352019 | 1691 | CarSat1 | red  | na |
| chrUn | 72352046 | 72352506 | 461  | CarSat1 | red  | na |
| chrUn | 72352539 | 72354149 | 1611 | CarSat1 | red  | na |
| chrUn | 72354342 | 72354570 | 229  | CarSat1 | red  | na |
| chrUn | 72369600 | 72370001 | 402  | SAT1_CF | blue | na |
| chrUn | 72370070 | 72370617 | 548  | SAT1_CF | blue | na |
| chrUn | 72370630 | 72371442 | 813  | SAT1_CF | blue | na |
| chrUn | 72371508 | 72372558 | 1051 | SAT1_CF | blue | na |
| chrUn | 72372635 | 72373180 | 546  | SAT1_CF | blue | na |
| chrUn | 72373193 | 72373299 | 107  | SAT1_CF | blue | na |
| chrUn | 72373322 | 72373895 | 574  | SAT1_CF | blue | na |
| chrUn | 72373906 | 72374476 | 571  | SAT1_CF | blue | na |
| chrUn | 72374488 | 72374612 | 125  | SAT1_CF | blue | na |
| chrUn | 72374623 | 72375817 | 1195 | SAT1_CF | blue | na |
| chrUn | 72375861 | 72377050 | 1190 | SAT1_CF | blue | na |
| chrUn | 72377078 | 72377214 | 137  | SAT1_CF | blue | na |
| chrUn | 72377280 | 72377780 | 501  | SAT1_CF | blue | na |
| chrUn | 72377794 | 72378477 | 684  | SAT1_CF | blue | na |
| chrUn | 72378489 | 72379163 | 675  | SAT1_CF | blue | na |
| chrUn | 72379207 | 72379894 | 688  | SAT1_CF | blue | na |
| chrUn | 72380909 | 72381445 | 537  | CarSat1 | red  | na |
| chrUn | 72381466 | 72382443 | 978  | CarSat1 | red  | na |
| chrUn | 72382473 | 72384386 | 1914 | CarSat1 | red  | na |

|       |          |          |      |         |        |    |
|-------|----------|----------|------|---------|--------|----|
| chrUn | 72384413 | 72387334 | 2922 | CarSat1 | red    | na |
| chrUn | 72387361 | 72388071 | 711  | CarSat1 | red    | na |
| chrUn | 72388098 | 72389544 | 1447 | CarSat1 | red    | na |
| chrUn | 72389569 | 72391197 | 1629 | CarSat1 | red    | na |
| chrUn | 72403789 | 72403914 | 126  | SAT1_CF | blue   | na |
| chrUn | 72403980 | 72404450 | 471  | SAT1_CF | blue   | na |
| chrUn | 72404473 | 72405797 | 1325 | SAT1_CF | blue   | na |
| chrUn | 72405812 | 72405969 | 158  | SAT1_CF | blue   | na |
| chrUn | 72405995 | 72406515 | 521  | SAT1_CF | blue   | na |
| chrUn | 72406535 | 72406600 | 66   | SAT1_CF | blue   | na |
| chrUn | 72406658 | 72407139 | 482  | SAT1_CF | blue   | na |
| chrUn | 72407157 | 72407826 | 670  | SAT1_CF | blue   | na |
| chrUn | 72407869 | 72408830 | 962  | SAT1_CF | blue   | na |
| chrUn | 72408908 | 72409416 | 509  | SAT1_CF | blue   | na |
| chrUn | 72409430 | 72410853 | 1424 | SAT1_CF | blue   | na |
| chrUn | 72410866 | 72411468 | 603  | SAT1_CF | blue   | na |
| chrUn | 72411739 | 72412424 | 686  | SAT1_CF | blue   | na |
| chrUn | 72412450 | 72414002 | 1553 | SAT1_CF | blue   | na |
| chrUn | 72415068 | 72415692 | 625  | CarSat1 | red    | na |
| chrUn | 72415707 | 72415834 | 128  | Carsat2 | orange | na |
| chrUn | 72415722 | 72416695 | 974  | CarSat1 | red    | na |
| chrUn | 72416716 | 72417680 | 965  | CarSat1 | red    | na |
| chrUn | 72417704 | 72418642 | 939  | CarSat1 | red    | na |
| chrUn | 72418657 | 72418784 | 128  | Carsat2 | orange | na |
| chrUn | 72418672 | 72422326 | 3655 | CarSat1 | red    | na |
| chrUn | 72422341 | 72422468 | 128  | Carsat2 | orange | na |
| chrUn | 72422356 | 72424444 | 2089 | CarSat1 | red    | na |
| chrUn | 72424473 | 72425336 | 864  | CarSat1 | red    | na |
| chrUn | 72426366 | 72427262 | 897  | CarSat1 | red    | na |
| chrUn | 72427287 | 72428484 | 1198 | CarSat1 | red    | na |
| chrUn | 72428511 | 72429958 | 1448 | CarSat1 | red    | na |
| chrUn | 72429985 | 72430947 | 963  | CarSat1 | red    | na |
| chrUn | 72430963 | 72432408 | 1446 | CarSat1 | red    | na |
| chrUn | 72432433 | 72433150 | 718  | CarSat1 | red    | na |
| chrUn | 72433166 | 72435358 | 2193 | CarSat1 | red    | na |
| chrUn | 72435374 | 72436515 | 1142 | CarSat1 | red    | na |
| chrUn | 72437615 | 72439628 | 2014 | CarSat1 | red    | na |
| chrUn | 72439650 | 72440366 | 717  | CarSat1 | red    | na |
| chrUn | 72440393 | 72441104 | 712  | CarSat1 | red    | na |
| chrUn | 72441125 | 72442089 | 965  | CarSat1 | red    | na |
| chrUn | 72442105 | 72443783 | 1679 | CarSat1 | red    | na |
| chrUn | 72443813 | 72444792 | 980  | CarSat1 | red    | na |

|       |          |          |      |         |      |    |
|-------|----------|----------|------|---------|------|----|
| chrUn | 72444819 | 72446267 | 1449 | CarSat1 | red  | na |
| chrUn | 72446294 | 72447880 | 1587 | CarSat1 | red  | na |
| chrUn | 72448922 | 72450550 | 1629 | CarSat1 | red  | na |
| chrUn | 72450575 | 72452019 | 1445 | CarSat1 | red  | na |
| chrUn | 72452052 | 72452219 | 168  | CarSat1 | red  | na |
| chrUn | 72452413 | 72453176 | 764  | CarSat1 | red  | na |
| chrUn | 72453206 | 72454322 | 1117 | CarSat1 | red  | na |
| chrUn | 72454504 | 72455582 | 1079 | CarSat1 | red  | na |
| chrUn | 72455782 | 72456818 | 1037 | CarSat1 | red  | na |
| chrUn | 72456839 | 72457553 | 715  | CarSat1 | red  | na |
| chrUn | 72457574 | 72458288 | 715  | CarSat1 | red  | na |
| chrUn | 72458309 | 72459141 | 833  | CarSat1 | red  | na |
| chrUn | 72460169 | 72461015 | 847  | SAT1_CF | blue | na |
| chrUn | 72461027 | 72461781 | 755  | SAT1_CF | blue | na |
| chrUn | 72461799 | 72462298 | 500  | SAT1_CF | blue | na |
| chrUn | 72462343 | 72462500 | 158  | SAT1_CF | blue | na |
| chrUn | 72462515 | 72463040 | 526  | SAT1_CF | blue | na |
| chrUn | 72463068 | 72463571 | 504  | SAT1_CF | blue | na |
| chrUn | 72463613 | 72464228 | 616  | SAT1_CF | blue | na |
| chrUn | 72464241 | 72465090 | 850  | SAT1_CF | blue | na |
| chrUn | 72465102 | 72465788 | 687  | SAT1_CF | blue | na |
| chrUn | 72465806 | 72467033 | 1228 | SAT1_CF | blue | na |
| chrUn | 72467045 | 72467647 | 603  | SAT1_CF | blue | na |
| chrUn | 72467658 | 72468338 | 681  | SAT1_CF | blue | na |
| chrUn | 72468350 | 72469079 | 730  | SAT1_CF | blue | na |
| chrUn | 72469101 | 72469208 | 108  | SAT1_CF | blue | na |
| chrUn | 72469221 | 72469766 | 546  | SAT1_CF | blue | na |
| chrUn | 72469844 | 72470371 | 528  | SAT1_CF | blue | na |
| chrUn | 72482966 | 72483562 | 597  | CarSat1 | red  | na |
| chrUn | 72483587 | 72484785 | 1199 | CarSat1 | red  | na |
| chrUn | 72484812 | 72486499 | 1688 | CarSat1 | red  | na |
| chrUn | 72486524 | 72487235 | 712  | CarSat1 | red  | na |
| chrUn | 72487260 | 72487980 | 721  | CarSat1 | red  | na |
| chrUn | 72487996 | 72491655 | 3660 | CarSat1 | red  | na |
| chrUn | 72491671 | 72492388 | 718  | CarSat1 | red  | na |
| chrUn | 72492404 | 72493168 | 765  | CarSat1 | red  | na |
| chrUn | 72494176 | 72495201 | 1026 | CarSat1 | red  | na |
| chrUn | 72495216 | 72496676 | 1461 | CarSat1 | red  | na |
| chrUn | 72496691 | 72498153 | 1463 | CarSat1 | red  | na |
| chrUn | 72498168 | 72498894 | 727  | CarSat1 | red  | na |
| chrUn | 72498909 | 72499631 | 723  | CarSat1 | red  | na |
| chrUn | 72499646 | 72504353 | 4708 | CarSat1 | red  | na |



|       |          |          |      |         |        |    |
|-------|----------|----------|------|---------|--------|----|
| chrUn | 72518222 | 72518904 | 683  | CarSat1 | red    | na |
| chrUn | 72518920 | 72522612 | 3693 | CarSat1 | red    | na |
| chrUn | 72522628 | 72524087 | 1460 | CarSat1 | red    | na |
| chrUn | 72524103 | 72524826 | 724  | CarSat1 | red    | na |
| chrUn | 72524842 | 72526047 | 1206 | CarSat1 | red    | na |
| chrUn | 72526074 | 72527772 | 1699 | CarSat1 | red    | na |
| chrUn | 72527788 | 72528420 | 633  | CarSat1 | red    | na |
| chrUn | 72529434 | 72530396 | 963  | CarSat1 | red    | na |
| chrUn | 72530423 | 72530892 | 470  | CarSat1 | red    | na |
| chrUn | 72530908 | 72531871 | 964  | CarSat1 | red    | na |
| chrUn | 72531898 | 72533105 | 1208 | CarSat1 | red    | na |
| chrUn | 72533121 | 72534570 | 1450 | CarSat1 | red    | na |
| chrUn | 72534595 | 72535314 | 720  | CarSat1 | red    | na |
| chrUn | 72535330 | 72536291 | 962  | CarSat1 | red    | na |
| chrUn | 72536323 | 72537525 | 1203 | CarSat1 | red    | na |
| chrUn | 72537541 | 72538998 | 1458 | CarSat1 | red    | na |
| chrUn | 72539014 | 72539610 | 597  | CarSat1 | red    | na |
| chrUn | 72540622 | 72540962 | 341  | CarSat1 | red    | na |
| chrUn | 72541146 | 72541946 | 801  | CarSat1 | red    | na |
| chrUn | 72541971 | 72544162 | 2192 | CarSat1 | red    | na |
| chrUn | 72544187 | 72544908 | 722  | CarSat1 | red    | na |
| chrUn | 72544924 | 72545644 | 721  | CarSat1 | red    | na |
| chrUn | 72545660 | 72549575 | 3916 | CarSat1 | red    | na |
| chrUn | 72549602 | 72550798 | 1197 | CarSat1 | red    | na |
| chrUn | 72551823 | 72552164 | 342  | SAT1_CF | blue   | na |
| chrUn | 72552348 | 72552529 | 182  | SAT1_CF | blue   | na |
| chrUn | 72552550 | 72553068 | 519  | SAT1_CF | blue   | na |
| chrUn | 72553082 | 72553905 | 824  | SAT1_CF | blue   | na |
| chrUn | 72554840 | 72555763 | 924  | SAT1_CF | blue   | na |
| chrUn | 72555823 | 72556754 | 932  | SAT1_CF | blue   | na |
| chrUn | 72556767 | 72557049 | 283  | SAT1_CF | blue   | na |
| chrUn | 72561386 | 72561736 | 351  | SAT1_CF | blue   | na |
| chrUn | 72561808 | 72563376 | 1569 | SAT1_CF | blue   | na |
| chrUn | 72563456 | 72564002 | 547  | SAT1_CF | blue   | na |
| chrUn | 72564050 | 72564450 | 401  | SAT1_CF | blue   | na |
| chrUn | 72564510 | 72565080 | 571  | SAT1_CF | blue   | na |
| chrUn | 72565099 | 72565652 | 554  | SAT1_CF | blue   | na |
| chrUn | 72566579 | 72568147 | 1569 | SAT1_CF | blue   | na |
| chrUn | 72569181 | 72569312 | 132  | Carsat2 | orange | na |
| chrUn | 72569195 | 72570438 | 1244 | CarSat1 | red    | na |
| chrUn | 72570465 | 72571912 | 1448 | CarSat1 | red    | na |
| chrUn | 72571939 | 72572650 | 712  | CarSat1 | red    | na |

|       |          |          |      |         |      |    |
|-------|----------|----------|------|---------|------|----|
| chrUn | 72572677 | 72573386 | 710  | CarSat1 | red  | na |
| chrUn | 72573413 | 72575849 | 2437 | CarSat1 | red  | na |
| chrUn | 72575874 | 72576333 | 460  | CarSat1 | red  | na |
| chrUn | 72576360 | 72578060 | 1701 | CarSat1 | red  | na |
| chrUn | 72578085 | 72579337 | 1253 | CarSat1 | red  | na |
| chrUn | 72580344 | 72580841 | 498  | SAT1_CF | blue | na |
| chrUn | 72580880 | 72581025 | 146  | SAT1_CF | blue | na |
| chrUn | 72581085 | 72581634 | 550  | SAT1_CF | blue | na |
| chrUn | 72581677 | 72582047 | 371  | SAT1_CF | blue | na |
| chrUn | 72582103 | 72582583 | 481  | SAT1_CF | blue | na |
| chrUn | 72582595 | 72583396 | 802  | SAT1_CF | blue | na |
| chrUn | 72583418 | 72583964 | 547  | SAT1_CF | blue | na |
| chrUn | 72584007 | 72584971 | 965  | SAT1_CF | blue | na |
| chrUn | 72585038 | 72585552 | 515  | SAT1_CF | blue | na |
| chrUn | 72585563 | 72585963 | 401  | SAT1_CF | blue | na |
| chrUn | 72586023 | 72586501 | 479  | SAT1_CF | blue | na |
| chrUn | 72586514 | 72588469 | 1956 | SAT1_CF | blue | na |
| chrUn | 72588513 | 72589060 | 548  | SAT1_CF | blue | na |
| chrUn | 72589103 | 72589305 | 203  | SAT1_CF | blue | na |
| chrUn | 72589486 | 72589666 | 181  | SAT1_CF | blue | na |
| chrUn | 72589727 | 72590197 | 471  | SAT1_CF | blue | na |
| chrUn | 72590220 | 72590524 | 305  | SAT1_CF | blue | na |
| chrUn | 72591525 | 72592107 | 583  | CarSat1 | red  | na |
| chrUn | 72592132 | 72594335 | 2204 | CarSat1 | red  | na |
| chrUn | 72594360 | 72595082 | 723  | CarSat1 | red  | na |
| chrUn | 72595098 | 72596059 | 962  | CarSat1 | red  | na |
| chrUn | 72596086 | 72596555 | 470  | CarSat1 | red  | na |
| chrUn | 72596571 | 72597532 | 962  | CarSat1 | red  | na |
| chrUn | 72597559 | 72598268 | 710  | CarSat1 | red  | na |
| chrUn | 72598295 | 72599004 | 710  | CarSat1 | red  | na |
| chrUn | 72599031 | 72599742 | 712  | CarSat1 | red  | na |
| chrUn | 72599769 | 72600479 | 711  | CarSat1 | red  | na |
| chrUn | 72600506 | 72601703 | 1198 | CarSat1 | red  | na |
| chrUn | 72613894 | 72615517 | 1624 | CarSat1 | red  | na |
| chrUn | 72615538 | 72616252 | 715  | CarSat1 | red  | na |
| chrUn | 72616273 | 72617722 | 1450 | CarSat1 | red  | na |
| chrUn | 72617743 | 72619192 | 1450 | CarSat1 | red  | na |
| chrUn | 72619213 | 72619927 | 715  | CarSat1 | red  | na |
| chrUn | 72619948 | 72620662 | 715  | CarSat1 | red  | na |
| chrUn | 72620683 | 72624059 | 3377 | CarSat1 | red  | na |
| chrUn | 72625116 | 72627742 | 2627 | CarSat1 | red  | na |
| chrUn | 72627772 | 72629003 | 1232 | CarSat1 | red  | na |

|       |          |          |      |         |     |    |
|-------|----------|----------|------|---------|-----|----|
| chrUn | 72629028 | 72629738 | 711  | CarSat1 | red | na |
| chrUn | 72629755 | 72630475 | 721  | CarSat1 | red | na |
| chrUn | 72630490 | 72632686 | 2197 | CarSat1 | red | na |
| chrUn | 72632702 | 72633170 | 469  | CarSat1 | red | na |
| chrUn | 72633197 | 72633911 | 715  | CarSat1 | red | na |
| chrUn | 72633938 | 72635203 | 1266 | CarSat1 | red | na |
| chrUn | 72636245 | 72638020 | 1776 | CarSat1 | red | na |
| chrUn | 72638047 | 72639495 | 1449 | CarSat1 | red | na |
| chrUn | 72639522 | 72641466 | 1945 | CarSat1 | red | na |
| chrUn | 72641482 | 72642713 | 1232 | CarSat1 | red | na |
| chrUn | 72642743 | 72643183 | 441  | CarSat1 | red | na |
| chrUn | 72643210 | 72643921 | 712  | CarSat1 | red | na |
| chrUn | 72643948 | 72644416 | 469  | CarSat1 | red | na |
| chrUn | 72644432 | 72645153 | 722  | CarSat1 | red | na |
| chrUn | 72645169 | 72645882 | 714  | CarSat1 | red | na |
| chrUn | 72645907 | 72646400 | 494  | CarSat1 | red | na |
| chrUn | 72647680 | 72648351 | 672  | CarSat1 | red | na |
| chrUn | 72648367 | 72649827 | 1461 | CarSat1 | red | na |
| chrUn | 72649843 | 72650804 | 962  | CarSat1 | red | na |
| chrUn | 72650831 | 72651545 | 715  | CarSat1 | red | na |
| chrUn | 72651566 | 72652773 | 1208 | CarSat1 | red | na |
| chrUn | 72652789 | 72653510 | 722  | CarSat1 | red | na |
| chrUn | 72653526 | 72655226 | 1701 | CarSat1 | red | na |
| chrUn | 72655253 | 72655722 | 470  | CarSat1 | red | na |
| chrUn | 72655738 | 72656702 | 965  | CarSat1 | red | na |
| chrUn | 72656729 | 72657577 | 849  | CarSat1 | red | na |
| chrUn | 72658581 | 72659174 | 594  | CarSat1 | red | na |
| chrUn | 72659189 | 72660634 | 1446 | CarSat1 | red | na |
| chrUn | 72660664 | 72661843 | 1180 | CarSat1 | red | na |
| chrUn | 72661870 | 72664548 | 2679 | CarSat1 | red | na |
| chrUn | 72664572 | 72665225 | 654  | CarSat1 | red | na |
| chrUn | 72665409 | 72666223 | 815  | CarSat1 | red | na |
| chrUn | 72666247 | 72667697 | 1451 | CarSat1 | red | na |
| chrUn | 72667721 | 72668706 | 986  | CarSat1 | red | na |
| chrUn | 72669748 | 72671024 | 1277 | CarSat1 | red | na |
| chrUn | 72671040 | 72672002 | 963  | CarSat1 | red | na |
| chrUn | 72672032 | 72672740 | 709  | CarSat1 | red | na |
| chrUn | 72672767 | 72674213 | 1447 | CarSat1 | red | na |
| chrUn | 72674238 | 72674952 | 715  | CarSat1 | red | na |
| chrUn | 72674977 | 72676185 | 1209 | CarSat1 | red | na |
| chrUn | 72676201 | 72677601 | 1401 | CarSat1 | red | na |
| chrUn | 72677782 | 72677866 | 85   | CarSat1 | red | na |

|       |          |          |      |         |     |    |
|-------|----------|----------|------|---------|-----|----|
| chrUn | 72677882 | 72679341 | 1460 | CarSat1 | red | na |
| chrUn | 72679357 | 72679899 | 543  | CarSat1 | red | na |
| chrUn | 72680904 | 72681497 | 594  | CarSat1 | red | na |
| chrUn | 72681513 | 72682473 | 961  | CarSat1 | red | na |
| chrUn | 72682500 | 72682973 | 474  | CarSat1 | red | na |
| chrUn | 72682997 | 72685422 | 2426 | CarSat1 | red | na |
| chrUn | 72685443 | 72687893 | 2451 | CarSat1 | red | na |
| chrUn | 72687923 | 72688631 | 709  | CarSat1 | red | na |
| chrUn | 72688661 | 72690109 | 1449 | CarSat1 | red | na |
| chrUn | 72690139 | 72691063 | 925  | CarSat1 | red | na |
| chrUn | 72692065 | 72693511 | 1447 | CarSat1 | red | na |
| chrUn | 72693527 | 72694238 | 712  | CarSat1 | red | na |
| chrUn | 72694263 | 72694974 | 712  | CarSat1 | red | na |
| chrUn | 72694990 | 72695710 | 721  | CarSat1 | red | na |
| chrUn | 72695726 | 72696444 | 719  | CarSat1 | red | na |
| chrUn | 72696460 | 72697396 | 937  | CarSat1 | red | na |
| chrUn | 72697426 | 72699206 | 1781 | CarSat1 | red | na |
| chrUn | 72699227 | 72700133 | 907  | CarSat1 | red | na |
| chrUn | 72700197 | 72702212 | 2016 | CarSat1 | red | na |
| chrUn | 72703220 | 72704238 | 1019 | CarSat1 | red | na |
| chrUn | 72704254 | 72705709 | 1456 | CarSat1 | red | na |
| chrUn | 72705725 | 72709630 | 3906 | CarSat1 | red | na |
| chrUn | 72709657 | 72710365 | 709  | CarSat1 | red | na |
| chrUn | 72710392 | 72711104 | 713  | CarSat1 | red | na |
| chrUn | 72711131 | 72711842 | 712  | CarSat1 | red | na |
| chrUn | 72711869 | 72712579 | 711  | CarSat1 | red | na |
| chrUn | 72712606 | 72713317 | 712  | CarSat1 | red | na |
| chrUn | 72714386 | 72715187 | 802  | CarSat1 | red | na |
| chrUn | 72715214 | 72716421 | 1208 | CarSat1 | red | na |
| chrUn | 72716446 | 72717403 | 958  | CarSat1 | red | na |
| chrUn | 72717424 | 72718135 | 712  | CarSat1 | red | na |
| chrUn | 72718162 | 72718622 | 461  | CarSat1 | red | na |
| chrUn | 72718646 | 72719141 | 496  | CarSat1 | red | na |
| chrUn | 72719171 | 72720347 | 1177 | CarSat1 | red | na |
| chrUn | 72720373 | 72723046 | 2674 | CarSat1 | red | na |
| chrUn | 72723071 | 72724512 | 1442 | CarSat1 | red | na |
| chrUn | 72739872 | 72740659 | 788  | CarSat1 | red | na |
| chrUn | 72740690 | 72742280 | 1591 | CarSat1 | red | na |
| chrUn | 72742311 | 72743900 | 1590 | CarSat1 | red | na |
| chrUn | 72743921 | 72745517 | 1597 | CarSat1 | red | na |
| chrUn | 72745548 | 72747137 | 1590 | CarSat1 | red | na |
| chrUn | 72747158 | 72748340 | 1183 | CarSat1 | red | na |

|       |          |          |      |         |        |    |
|-------|----------|----------|------|---------|--------|----|
| chrUn | 72751040 | 72751533 | 494  | CarSat1 | red    | na |
| chrUn | 72751549 | 72752755 | 1207 | CarSat1 | red    | na |
| chrUn | 72752782 | 72753492 | 711  | CarSat1 | red    | na |
| chrUn | 72753519 | 72755221 | 1703 | CarSat1 | red    | na |
| chrUn | 72755237 | 72755705 | 469  | CarSat1 | red    | na |
| chrUn | 72755732 | 72756442 | 711  | CarSat1 | red    | na |
| chrUn | 72756469 | 72757430 | 962  | CarSat1 | red    | na |
| chrUn | 72757446 | 72759392 | 1947 | CarSat1 | red    | na |
| chrUn | 72759419 | 72760130 | 712  | CarSat1 | red    | na |
| chrUn | 72760157 | 72761111 | 955  | CarSat1 | red    | na |
| chrUn | 72762153 | 72763948 | 1796 | CarSat1 | red    | na |
| chrUn | 72763964 | 72765664 | 1701 | CarSat1 | red    | na |
| chrUn | 72765693 | 72767878 | 2186 | CarSat1 | red    | na |
| chrUn | 72767905 | 72768615 | 711  | CarSat1 | red    | na |
| chrUn | 72768642 | 72769848 | 1207 | CarSat1 | red    | na |
| chrUn | 72769864 | 72770586 | 723  | CarSat1 | red    | na |
| chrUn | 72770602 | 72772288 | 1687 | CarSat1 | red    | na |
| chrUn | 72773293 | 72774222 | 930  | CarSat1 | red    | na |
| chrUn | 72774246 | 72775921 | 1676 | CarSat1 | red    | na |
| chrUn | 72775951 | 72776663 | 713  | CarSat1 | red    | na |
| chrUn | 72776678 | 72776805 | 128  | Carsat2 | orange | na |
| chrUn | 72776693 | 72777404 | 712  | CarSat1 | red    | na |
| chrUn | 72777434 | 72778879 | 1446 | CarSat1 | red    | na |
| chrUn | 72778908 | 72781094 | 2187 | CarSat1 | red    | na |
| chrUn | 72781109 | 72781237 | 129  | Carsat2 | orange | na |
| chrUn | 72781124 | 72783426 | 2303 | CarSat1 | red    | na |
| chrUn | 72784441 | 72786346 | 1906 | CarSat1 | red    | na |
| chrUn | 72786373 | 72788308 | 1936 | CarSat1 | red    | na |
| chrUn | 72788333 | 72789294 | 962  | CarSat1 | red    | na |
| chrUn | 72789321 | 72789789 | 469  | CarSat1 | red    | na |
| chrUn | 72789805 | 72790767 | 963  | CarSat1 | red    | na |
| chrUn | 72790794 | 72793718 | 2925 | CarSat1 | red    | na |
| chrUn | 72793745 | 72794562 | 818  | CarSat1 | red    | na |
| chrUn | 72795565 | 72797161 | 1597 | CarSat1 | red    | na |
| chrUn | 72797188 | 72797897 | 710  | CarSat1 | red    | na |
| chrUn | 72797924 | 72798980 | 1057 | CarSat1 | red    | na |
| chrUn | 72799163 | 72799333 | 171  | CarSat1 | red    | na |
| chrUn | 72799349 | 72800312 | 964  | CarSat1 | red    | na |
| chrUn | 72800339 | 72802524 | 2186 | CarSat1 | red    | na |
| chrUn | 72802551 | 72803999 | 1449 | CarSat1 | red    | na |
| chrUn | 72804026 | 72805691 | 1666 | CarSat1 | red    | na |
| chrUn | 72806740 | 72810561 | 3822 | CarSat1 | red    | na |

|       |          |          |      |         |        |    |
|-------|----------|----------|------|---------|--------|----|
| chrUn | 72810576 | 72813068 | 2493 | CarSat1 | red    | na |
| chrUn | 72813691 | 72814741 | 1051 | CarSat1 | red    | na |
| chrUn | 72814755 | 72815462 | 708  | CarSat1 | red    | na |
| chrUn | 72815492 | 72816938 | 1447 | CarSat1 | red    | na |
| chrUn | 72816968 | 72817426 | 459  | CarSat1 | red    | na |
| chrUn | 72829577 | 72830369 | 793  | CarSat1 | red    | na |
| chrUn | 72830393 | 72831104 | 712  | CarSat1 | red    | na |
| chrUn | 72831129 | 72831850 | 722  | CarSat1 | red    | na |
| chrUn | 72831875 | 72835527 | 3653 | CarSat1 | red    | na |
| chrUn | 72835552 | 72836264 | 713  | CarSat1 | red    | na |
| chrUn | 72836298 | 72837521 | 1224 | CarSat1 | red    | na |
| chrUn | 72837561 | 72839679 | 2119 | CarSat1 | red    | na |
| chrUn | 72855666 | 72856906 | 1241 | SAT1_CF | blue   | na |
| chrUn | 72856948 | 72857933 | 986  | SAT1_CF | blue   | na |
| chrUn | 72857958 | 72859705 | 1748 | SAT1_CF | blue   | na |
| chrUn | 72859777 | 72860292 | 516  | SAT1_CF | blue   | na |
| chrUn | 72860379 | 72860881 | 503  | SAT1_CF | blue   | na |
| chrUn | 72860893 | 72860964 | 72   | SAT1_CF | blue   | na |
| chrUn | 72861021 | 72861487 | 467  | SAT1_CF | blue   | na |
| chrUn | 72861499 | 72861608 | 110  | SAT1_CF | blue   | na |
| chrUn | 72861628 | 72862826 | 1199 | SAT1_CF | blue   | na |
| chrUn | 72862870 | 72863845 | 976  | SAT1_CF | blue   | na |
| chrUn | 72863915 | 72864553 | 639  | SAT1_CF | blue   | na |
| chrUn | 72864573 | 72865301 | 729  | SAT1_CF | blue   | na |
| chrUn | 72865313 | 72865644 | 332  | SAT1_CF | blue   | na |
| chrUn | 72866660 | 72867594 | 935  | CarSat1 | red    | na |
| chrUn | 72867610 | 72868572 | 963  | CarSat1 | red    | na |
| chrUn | 72868599 | 72869057 | 459  | CarSat1 | red    | na |
| chrUn | 72869083 | 72872251 | 3169 | CarSat1 | red    | na |
| chrUn | 72872280 | 72872990 | 711  | CarSat1 | red    | na |
| chrUn | 72873017 | 72874211 | 1195 | CarSat1 | red    | na |
| chrUn | 72874236 | 72875935 | 1700 | CarSat1 | red    | na |
| chrUn | 72875962 | 72876710 | 749  | CarSat1 | red    | na |
| chrUn | 72891691 | 72892398 | 708  | CarSat1 | red    | na |
| chrUn | 72892413 | 72892539 | 127  | Carsat2 | orange | na |
| chrUn | 72892428 | 72893139 | 712  | CarSat1 | red    | na |
| chrUn | 72893154 | 72893280 | 127  | Carsat2 | orange | na |
| chrUn | 72893169 | 72893877 | 709  | CarSat1 | red    | na |
| chrUn | 72893892 | 72894019 | 128  | Carsat2 | orange | na |
| chrUn | 72893907 | 72895355 | 1449 | CarSat1 | red    | na |
| chrUn | 72895370 | 72895495 | 126  | Carsat2 | orange | na |
| chrUn | 72895385 | 72896095 | 711  | CarSat1 | red    | na |

|       |          |          |      |         |        |    |
|-------|----------|----------|------|---------|--------|----|
| chrUn | 72896110 | 72896236 | 127  | Carsat2 | orange | na |
| chrUn | 72896125 | 72899778 | 3654 | CarSat1 | red    | na |
| chrUn | 72899808 | 72901030 | 1223 | CarSat1 | red    | na |
| chrUn | 72901054 | 72901740 | 687  | CarSat1 | red    | na |
| chrUn | 72902745 | 72906728 | 3984 | CarSat1 | red    | na |
| chrUn | 72906759 | 72908201 | 1443 | CarSat1 | red    | na |
| chrUn | 72908231 | 72909171 | 941  | CarSat1 | red    | na |
| chrUn | 72909195 | 72909909 | 715  | CarSat1 | red    | na |
| chrUn | 72909933 | 72910646 | 714  | CarSat1 | red    | na |
| chrUn | 72910670 | 72912119 | 1450 | CarSat1 | red    | na |
| chrUn | 72912143 | 72912812 | 670  | CarSat1 | red    | na |
| chrUn | 72935966 | 72936641 | 676  | CarSat1 | red    | na |
| chrUn | 72936656 | 72936782 | 127  | Carsat2 | orange | na |
| chrUn | 72936671 | 72938379 | 1709 | CarSat1 | red    | na |
| chrUn | 72938406 | 72939113 | 708  | CarSat1 | red    | na |
| chrUn | 72939140 | 72941562 | 2423 | CarSat1 | red    | na |
| chrUn | 72941587 | 72942523 | 937  | CarSat1 | red    | na |
| chrUn | 72942553 | 72944268 | 1716 | CarSat1 | red    | na |
| chrUn | 72944295 | 72944736 | 442  | CarSat1 | red    | na |
| chrUn | 72944766 | 72945991 | 1226 | CarSat1 | red    | na |
| chrUn | 72970461 | 72973209 | 2749 | CarSat1 | red    | na |
| chrUn | 72973225 | 72974933 | 1709 | CarSat1 | red    | na |
| chrUn | 72974960 | 72976165 | 1206 | CarSat1 | red    | na |
| chrUn | 72976181 | 72978619 | 2439 | CarSat1 | red    | na |
| chrUn | 72978646 | 72979114 | 469  | CarSat1 | red    | na |
| chrUn | 72979139 | 72979851 | 713  | CarSat1 | red    | na |
| chrUn | 72979867 | 72980463 | 597  | CarSat1 | red    | na |
| chrUn | 72981491 | 72981950 | 460  | CarSat1 | red    | na |
| chrUn | 72981980 | 72982687 | 708  | CarSat1 | red    | na |
| chrUn | 72982717 | 72984160 | 1444 | CarSat1 | red    | na |
| chrUn | 72984190 | 72984897 | 708  | CarSat1 | red    | na |
| chrUn | 72984927 | 72986369 | 1443 | CarSat1 | red    | na |
| chrUn | 72986399 | 72987841 | 1443 | CarSat1 | red    | na |
| chrUn | 72987873 | 72989091 | 1219 | CarSat1 | red    | na |
| chrUn | 72989116 | 72990050 | 935  | CarSat1 | red    | na |
| chrUn | 72990080 | 72990786 | 707  | CarSat1 | red    | na |
| chrUn | 72990816 | 72991497 | 682  | CarSat1 | red    | na |
| chrUn | 72992504 | 72994531 | 2028 | CarSat1 | red    | na |
| chrUn | 72994556 | 72995269 | 714  | CarSat1 | red    | na |
| chrUn | 72995296 | 72996743 | 1448 | CarSat1 | red    | na |
| chrUn | 72996770 | 72998706 | 1937 | CarSat1 | red    | na |
| chrUn | 72998722 | 73000420 | 1699 | CarSat1 | red    | na |

|       |          |          |      |         |        |    |
|-------|----------|----------|------|---------|--------|----|
| chrUn | 73000447 | 73002519 | 2073 | CarSat1 | red    | na |
| chrUn | 73003545 | 73004794 | 1250 | CarSat1 | red    | na |
| chrUn | 73004821 | 73005780 | 960  | CarSat1 | red    | na |
| chrUn | 73005796 | 73009467 | 3672 | CarSat1 | red    | na |
| chrUn | 73009483 | 73010941 | 1459 | CarSat1 | red    | na |
| chrUn | 73010957 | 73011426 | 470  | CarSat1 | red    | na |
| chrUn | 73011453 | 73012900 | 1448 | CarSat1 | red    | na |
| chrUn | 73012927 | 73013515 | 589  | CarSat1 | red    | na |
| chrUn | 73014585 | 73015552 | 968  | CarSat1 | red    | na |
| chrUn | 73015568 | 73016775 | 1208 | CarSat1 | red    | na |
| chrUn | 73016802 | 73019233 | 2432 | CarSat1 | red    | na |
| chrUn | 73019249 | 73020454 | 1206 | CarSat1 | red    | na |
| chrUn | 73020481 | 73021189 | 709  | CarSat1 | red    | na |
| chrUn | 73021216 | 73023639 | 2424 | CarSat1 | red    | na |
| chrUn | 73023665 | 73024466 | 802  | CarSat1 | red    | na |
| chrUn | 73025534 | 73028326 | 2793 | CarSat1 | red    | na |
| chrUn | 73028353 | 73029063 | 711  | CarSat1 | red    | na |
| chrUn | 73029090 | 73029798 | 709  | CarSat1 | red    | na |
| chrUn | 73029825 | 73030534 | 710  | CarSat1 | red    | na |
| chrUn | 73030561 | 73031272 | 712  | CarSat1 | red    | na |
| chrUn | 73031299 | 73031719 | 421  | CarSat1 | red    | na |
| chrUn | 73031762 | 73032742 | 981  | CarSat1 | red    | na |
| chrUn | 73032769 | 73033479 | 711  | CarSat1 | red    | na |
| chrUn | 73033506 | 73034952 | 1447 | CarSat1 | red    | na |
| chrUn | 73034979 | 73035533 | 555  | CarSat1 | red    | na |
| chrUn | 73036571 | 73038275 | 1705 | CarSat1 | red    | na |
| chrUn | 73038291 | 73039012 | 722  | CarSat1 | red    | na |
| chrUn | 73039028 | 73039962 | 935  | CarSat1 | red    | na |
| chrUn | 73039992 | 73040971 | 980  | CarSat1 | red    | na |
| chrUn | 73040992 | 73041961 | 970  | CarSat1 | red    | na |
| chrUn | 73041977 | 73043178 | 1202 | CarSat1 | red    | na |
| chrUn | 73043205 | 73044389 | 1185 | CarSat1 | red    | na |
| chrUn | 73044424 | 73045645 | 1222 | CarSat1 | red    | na |
| chrUn | 73045661 | 73046538 | 878  | CarSat1 | red    | na |
| chrUn | 73072120 | 73073974 | 1855 | CarSat1 | red    | na |
| chrUn | 73074004 | 73075660 | 1657 | CarSat1 | red    | na |
| chrUn | 73075685 | 73082075 | 6391 | CarSat1 | red    | na |
| chrUn | 73094238 | 73094988 | 751  | CarSat1 | red    | na |
| chrUn | 73095173 | 73095314 | 142  | CarSat1 | red    | na |
| chrUn | 73095329 | 73095456 | 128  | Carsat2 | orange | na |
| chrUn | 73095344 | 73095926 | 583  | CarSat1 | red    | na |
| chrUn | 73096110 | 73096243 | 134  | CarSat1 | red    | na |



|       |          |          |      |         |        |    |
|-------|----------|----------|------|---------|--------|----|
| chrUn | 73096265 | 73096391 | 127  | Carsat2 | orange | na |
| chrUn | 73096280 | 73096987 | 708  | CarSat1 | red    | na |
| chrUn | 73097017 | 73097723 | 707  | CarSat1 | red    | na |
| chrUn | 73097753 | 73098464 | 712  | CarSat1 | red    | na |
| chrUn | 73098479 | 73098605 | 127  | Carsat2 | orange | na |
| chrUn | 73098494 | 73099201 | 708  | CarSat1 | red    | na |
| chrUn | 73099216 | 73099343 | 128  | Carsat2 | orange | na |
| chrUn | 73099231 | 73101415 | 2185 | CarSat1 | red    | na |
| chrUn | 73101445 | 73102151 | 707  | CarSat1 | red    | na |
| chrUn | 73102181 | 73103157 | 977  | CarSat1 | red    | na |
| chrUn | 73103178 | 73104146 | 969  | CarSat1 | red    | na |
| chrUn | 73121738 | 73124768 | 3031 | CarSat1 | red    | na |
| chrUn | 73124793 | 73125506 | 714  | CarSat1 | red    | na |
| chrUn | 73125531 | 73127726 | 2196 | CarSat1 | red    | na |
| chrUn | 73127750 | 73128714 | 965  | CarSat1 | red    | na |
| chrUn | 73128732 | 73130925 | 2194 | CarSat1 | red    | na |
| chrUn | 73130946 | 73131643 | 698  | CarSat1 | red    | na |
| chrUn | 73132644 | 73134636 | 1993 | CarSat1 | red    | na |
| chrUn | 73134652 | 73136351 | 1700 | CarSat1 | red    | na |
| chrUn | 73136378 | 73137087 | 710  | CarSat1 | red    | na |
| chrUn | 73137114 | 73137582 | 469  | CarSat1 | red    | na |
| chrUn | 73137598 | 73138318 | 721  | CarSat1 | red    | na |
| chrUn | 73138334 | 73140030 | 1697 | CarSat1 | red    | na |
| chrUn | 73140057 | 73140767 | 711  | CarSat1 | red    | na |
| chrUn | 73140794 | 73141263 | 470  | CarSat1 | red    | na |
| chrUn | 73141279 | 73141999 | 721  | CarSat1 | red    | na |
| chrUn | 73142015 | 73142557 | 543  | CarSat1 | red    | na |
| chrUn | 73154486 | 73155072 | 587  | CarSat1 | red    | na |
| chrUn | 73155099 | 73155807 | 709  | CarSat1 | red    | na |
| chrUn | 73155834 | 73158270 | 2437 | CarSat1 | red    | na |
| chrUn | 73158286 | 73158750 | 465  | CarSat1 | red    | na |
| chrUn | 73158777 | 73159739 | 963  | CarSat1 | red    | na |
| chrUn | 73159755 | 73160224 | 470  | CarSat1 | red    | na |
| chrUn | 73160251 | 73164378 | 4128 | CarSat1 | red    | na |
| chrUn | 73178069 | 73178684 | 616  | Sat8CF  | dgreen | na |
| chrUn | 73178472 | 73179969 | 1498 | Sat8CF  | dgreen | na |
| chrUn | 73178854 | 73180275 | 1422 | Sat8CF  | dgreen | na |
| chrUn | 73179453 | 73180882 | 1430 | Sat8CF  | dgreen | na |
| chrUn | 73180976 | 73182404 | 1429 | Sat8CF  | dgreen | na |
| chrUn | 73181582 | 73183011 | 1430 | Sat8CF  | dgreen | na |
| chrUn | 73183105 | 73184530 | 1426 | Sat8CF  | dgreen | na |
| chrUn | 73184624 | 73186057 | 1434 | Sat8CF  | dgreen | na |

|       |          |          |              |        |    |
|-------|----------|----------|--------------|--------|----|
| chrUn | 73185235 | 73186219 | 985 Sat8CF   | dgreen | na |
| chrUn | 73187224 | 73187740 | 517 CarSat1  | red    | na |
| chrUn | 73187767 | 73188721 | 955 CarSat1  | red    | na |
| chrUn | 73188746 | 73189216 | 471 CarSat1  | red    | na |
| chrUn | 73189243 | 73189952 | 710 CarSat1  | red    | na |
| chrUn | 73189979 | 73190690 | 712 CarSat1  | red    | na |
| chrUn | 73190717 | 73191681 | 965 CarSat1  | red    | na |
| chrUn | 73191706 | 73192409 | 704 CarSat1  | red    | na |
| chrUn | 73192434 | 73192891 | 458 CarSat1  | red    | na |
| chrUn | 73192918 | 73193878 | 961 CarSat1  | red    | na |
| chrUn | 73193903 | 73194363 | 461 CarSat1  | red    | na |
| chrUn | 73194390 | 73195100 | 711 CarSat1  | red    | na |
| chrUn | 73195127 | 73195567 | 441 CarSat1  | red    | na |
| chrUn | 73195597 | 73197123 | 1527 CarSat1 | red    | na |
| chrUn | 73198134 | 73198928 | 795 CarSat1  | red    | na |
| chrUn | 73198958 | 73200417 | 1460 CarSat1 | red    | na |
| chrUn | 73200432 | 73201154 | 723 CarSat1  | red    | na |
| chrUn | 73201169 | 73202094 | 926 CarSat1  | red    | na |
| chrUn | 73202128 | 73202628 | 501 CarSat1  | red    | na |
| chrUn | 73202643 | 73204084 | 1442 CarSat1 | red    | na |
| chrUn | 73204114 | 73207251 | 3138 CarSat1 | red    | na |
| chrUn | 73207284 | 73208029 | 746 CarSat1  | red    | na |
| chrUn | 73209030 | 73210100 | 1071 CarSat1 | red    | na |
| chrUn | 73210115 | 73210242 | 128 Carsat2  | orange | na |
| chrUn | 73210130 | 73210837 | 708 CarSat1  | red    | na |
| chrUn | 73210867 | 73211575 | 709 CarSat1  | red    | na |
| chrUn | 73211605 | 73212317 | 713 CarSat1  | red    | na |
| chrUn | 73212332 | 73212459 | 128 Carsat2  | orange | na |
| chrUn | 73212347 | 73213054 | 708 CarSat1  | red    | na |
| chrUn | 73213069 | 73213184 | 116 Carsat2  | orange | na |
| chrUn | 73213084 | 73214305 | 1222 CarSat1 | red    | na |
| chrUn | 73214338 | 73215043 | 706 CarSat1  | red    | na |
| chrUn | 73215076 | 73215539 | 464 CarSat1  | red    | na |
| chrUn | 73215730 | 73216201 | 472 CarSat1  | red    | na |
| chrUn | 73216231 | 73218185 | 1955 CarSat1 | red    | na |
| chrUn | 73218218 | 73218652 | 435 CarSat1  | red    | na |
| chrUn | 73237657 | 73239371 | 1715 CarSat1 | red    | na |
| chrUn | 73239408 | 73241808 | 2401 CarSat1 | red    | na |
| chrUn | 73241833 | 73242535 | 703 CarSat1  | red    | na |
| chrUn | 73242560 | 73243282 | 723 CarSat1  | red    | na |
| chrUn | 73243307 | 73244010 | 704 CarSat1  | red    | na |
| chrUn | 73244035 | 73244748 | 714 CarSat1  | red    | na |

|       |          |          |      |         |     |    |
|-------|----------|----------|------|---------|-----|----|
| chrUn | 73244773 | 73245493 | 721  | CarSat1 | red | na |
| chrUn | 73245518 | 73246221 | 704  | CarSat1 | red | na |
| chrUn | 73246246 | 73246740 | 495  | CarSat1 | red | na |
| chrUn | 73246780 | 73247467 | 688  | CarSat1 | red | na |
| chrUn | 73273048 | 73276119 | 3072 | CarSat1 | red | na |
| chrUn | 73276144 | 73276603 | 460  | CarSat1 | red | na |
| chrUn | 73276624 | 73277585 | 962  | CarSat1 | red | na |
| chrUn | 73277618 | 73278452 | 835  | CarSat1 | red | na |
| chrUn | 73280946 | 73281539 | 594  | CarSat1 | red | na |
| chrUn | 73281566 | 73283257 | 1692 | CarSat1 | red | na |
| chrUn | 73283291 | 73284731 | 1441 | CarSat1 | red | na |
| chrUn | 73284756 | 73285225 | 470  | CarSat1 | red | na |
| chrUn | 73297159 | 73298540 | 1382 | CarSat1 | red | na |
| chrUn | 73298567 | 73302959 | 4393 | CarSat1 | red | na |
| chrUn | 73302986 | 73303695 | 710  | CarSat1 | red | na |
| chrUn | 73303720 | 73304694 | 975  | CarSat1 | red | na |
| chrUn | 73304733 | 73306968 | 2236 | CarSat1 | red | na |
| chrUn | 73307970 | 73310304 | 2335 | CarSat1 | red | na |
| chrUn | 73310329 | 73311033 | 705  | CarSat1 | red | na |
| chrUn | 73311067 | 73311527 | 461  | CarSat1 | red | na |
| chrUn | 73311554 | 73312262 | 709  | CarSat1 | red | na |
| chrUn | 73312283 | 73317779 | 5497 | CarSat1 | red | na |
| chrUn | 73318780 | 73319628 | 849  | CarSat1 | red | na |
| chrUn | 73319655 | 73320364 | 710  | CarSat1 | red | na |
| chrUn | 73320391 | 73322576 | 2186 | CarSat1 | red | na |
| chrUn | 73322603 | 73323313 | 711  | CarSat1 | red | na |
| chrUn | 73323340 | 73324303 | 964  | CarSat1 | red | na |
| chrUn | 73324319 | 73324787 | 469  | CarSat1 | red | na |
| chrUn | 73324814 | 73325776 | 963  | CarSat1 | red | na |
| chrUn | 73325792 | 73326512 | 721  | CarSat1 | red | na |
| chrUn | 73326528 | 73327248 | 721  | CarSat1 | red | na |
| chrUn | 73327264 | 73328587 | 1324 | CarSat1 | red | na |
| chrUn | 73329605 | 73331446 | 1842 | CarSat1 | red | na |
| chrUn | 73331466 | 73332914 | 1449 | CarSat1 | red | na |
| chrUn | 73332941 | 73333651 | 711  | CarSat1 | red | na |
| chrUn | 73333678 | 73335125 | 1448 | CarSat1 | red | na |
| chrUn | 73335152 | 73335861 | 710  | CarSat1 | red | na |
| chrUn | 73335888 | 73336598 | 711  | CarSat1 | red | na |
| chrUn | 73336625 | 73337336 | 712  | CarSat1 | red | na |
| chrUn | 73337363 | 73338073 | 711  | CarSat1 | red | na |
| chrUn | 73338100 | 73338567 | 468  | CarSat1 | red | na |
| chrUn | 73338583 | 73339386 | 804  | CarSat1 | red | na |

|       |          |          |      |         |        |    |
|-------|----------|----------|------|---------|--------|----|
| chrUn | 73340401 | 73340829 | 429  | CarSat1 | red    | na |
| chrUn | 73340845 | 73342301 | 1457 | CarSat1 | red    | na |
| chrUn | 73342317 | 73344512 | 2196 | CarSat1 | red    | na |
| chrUn | 73344528 | 73345490 | 963  | CarSat1 | red    | na |
| chrUn | 73345517 | 73345984 | 468  | CarSat1 | red    | na |
| chrUn | 73346000 | 73346961 | 962  | CarSat1 | red    | na |
| chrUn | 73346988 | 73347433 | 446  | CarSat1 | red    | na |
| chrUn | 73347479 | 73348193 | 715  | CarSat1 | red    | na |
| chrUn | 73348209 | 73348930 | 722  | CarSat1 | red    | na |
| chrUn | 73348946 | 73350172 | 1227 | CarSat1 | red    | na |
| chrUn | 73355248 | 73356200 | 953  | Carsat2 | orange | na |
| chrUn | 73361973 | 73362925 | 953  | CarSat1 | red    | na |
| chrUn | 73362952 | 73363412 | 461  | CarSat1 | red    | na |
| chrUn | 73363437 | 73365420 | 1984 | CarSat1 | red    | na |
| chrUn | 73365436 | 73365875 | 440  | CarSat1 | red    | na |
| chrUn | 73365904 | 73366899 | 996  | CarSat1 | red    | na |
| chrUn | 73366914 | 73367360 | 447  | CarSat1 | red    | na |
| chrUn | 73367381 | 73369113 | 1733 | CarSat1 | red    | na |
| chrUn | 73369128 | 73369836 | 709  | CarSat1 | red    | na |
| chrUn | 73369866 | 73371724 | 1859 | CarSat1 | red    | na |
| chrUn | 73404958 | 73406182 | 1225 | CarSat1 | red    | na |
| chrUn | 73406215 | 73407140 | 926  | CarSat1 | red    | na |
| chrUn | 73407170 | 73407881 | 712  | CarSat1 | red    | na |
| chrUn | 73407896 | 73408009 | 114  | Carsat2 | orange | na |
| chrUn | 73407911 | 73408891 | 981  | CarSat1 | red    | na |
| chrUn | 73409397 | 73410104 | 708  | CarSat1 | red    | na |
| chrUn | 73410119 | 73410245 | 127  | Carsat2 | orange | na |
| chrUn | 73410134 | 73410758 | 625  | CarSat1 | red    | na |
| chrUn | 73411768 | 73412933 | 1166 | CarSat1 | red    | na |
| chrUn | 73412963 | 73413614 | 652  | CarSat1 | red    | na |
| chrUn | 73414794 | 73414981 | 188  | Carsat2 | orange | na |
| chrUn | 73414813 | 73415271 | 459  | CarSat1 | red    | na |
| chrUn | 73415286 | 73415412 | 127  | Carsat2 | orange | na |
| chrUn | 73415301 | 73415930 | 630  | CarSat1 | red    | na |
| chrUn | 73420847 | 73422141 | 1295 | CarSat1 | red    | na |
| chrUn | 73423141 | 73424300 | 1160 | CarSat1 | red    | na |
| chrUn | 73424330 | 73427244 | 2915 | CarSat1 | red    | na |
| chrUn | 73427259 | 73427385 | 127  | Carsat2 | orange | na |
| chrUn | 73427274 | 73427758 | 485  | CarSat1 | red    | na |
| chrUn | 73427791 | 73428711 | 921  | CarSat1 | red    | na |
| chrUn | 73428726 | 73428852 | 127  | Carsat2 | orange | na |
| chrUn | 73428741 | 73429447 | 707  | CarSat1 | red    | na |

|       |          |          |      |         |        |    |
|-------|----------|----------|------|---------|--------|----|
| chrUn | 73429462 | 73429577 | 116  | Carsat2 | orange | na |
| chrUn | 73429477 | 73430787 | 1311 | CarSat1 | red    | na |
| chrUn | 73430823 | 73432844 | 2022 | CarSat1 | red    | na |
| chrUn | 73433892 | 73437085 | 3194 | CarSat1 | red    | na |
| chrUn | 73437101 | 73441222 | 4122 | CarSat1 | red    | na |
| chrUn | 73441591 | 73443534 | 1944 | CarSat1 | red    | na |
| chrUn | 73444543 | 73445028 | 486  | CarSat1 | red    | na |
| chrUn | 73445179 | 73446625 | 1447 | CarSat1 | red    | na |
| chrUn | 73446785 | 73447412 | 628  | CarSat1 | red    | na |
| chrUn | 73447493 | 73448399 | 907  | CarSat1 | red    | na |
| chrUn | 73448420 | 73449477 | 1058 | CarSat1 | red    | na |
| chrUn | 73449492 | 73450427 | 936  | CarSat1 | red    | na |
| chrUn | 73450443 | 73451674 | 1232 | CarSat1 | red    | na |
| chrUn | 73451704 | 73452427 | 724  | CarSat1 | red    | na |
| chrUn | 73452449 | 73452881 | 433  | CarSat1 | red    | na |
| chrUn | 73452908 | 73454230 | 1323 | CarSat1 | red    | na |
| chrUn | 73466910 | 73467676 | 767  | Sat2CF  | purple | na |
| chrUn | 73466933 | 73467598 | 666  | Sat2CF  | purple | na |
| chrUn | 73471506 | 73471801 | 296  | Carsat2 | orange | na |
| chrUn | 73482801 | 73483516 | 716  | CarSat1 | red    | na |
| chrUn | 73483719 | 73484602 | 884  | CarSat1 | red    | na |
| chrUn | 73484627 | 73485339 | 713  | CarSat1 | red    | na |
| chrUn | 73485355 | 73487547 | 2193 | CarSat1 | red    | na |
| chrUn | 73487573 | 73488495 | 923  | CarSat1 | red    | na |
| chrUn | 73488525 | 73489758 | 1234 | CarSat1 | red    | na |
| chrUn | 73489787 | 73490980 | 1194 | CarSat1 | red    | na |
| chrUn | 73491007 | 73491631 | 625  | CarSat1 | red    | na |
| chrUn | 73503337 | 73507806 | 4470 | CarSat1 | red    | na |
| chrUn | 73507831 | 73509281 | 1451 | CarSat1 | red    | na |
| chrUn | 73509306 | 73510756 | 1451 | CarSat1 | red    | na |
| chrUn | 73510781 | 73512878 | 2098 | CarSat1 | red    | na |
| chrUn | 73524589 | 73524733 | 145  | Carsat2 | orange | na |
| chrUn | 73524605 | 73525718 | 1114 | CarSat1 | red    | na |
| chrUn | 73527835 | 73528629 | 795  | CarSat1 | red    | na |
| chrUn | 73528654 | 73529445 | 792  | CarSat1 | red    | na |
| chrUn | 73535248 | 73536417 | 1170 | CarSat1 | red    | na |
| chrUn | 73536444 | 73536862 | 419  | CarSat1 | red    | na |
| chrUn | 73537925 | 73538894 | 970  | CarSat1 | red    | na |
| chrUn | 73538919 | 73539712 | 794  | CarSat1 | red    | na |
| chrUn | 73543247 | 73544598 | 1352 | CarSat1 | red    | na |
| chrUn | 73549873 | 73550668 | 796  | CarSat1 | red    | na |
| chrUn | 73550693 | 73551895 | 1203 | CarSat1 | red    | na |

|       |          |          |      |         |      |    |
|-------|----------|----------|------|---------|------|----|
| chrUn | 73552903 | 73555318 | 2416 | CarSat1 | red  | na |
| chrUn | 73555345 | 73559737 | 4393 | CarSat1 | red  | na |
| chrUn | 73559764 | 73560474 | 711  | CarSat1 | red  | na |
| chrUn | 73560501 | 73560961 | 461  | CarSat1 | red  | na |
| chrUn | 73561000 | 73561708 | 709  | CarSat1 | red  | na |
| chrUn | 73561733 | 73562493 | 761  | CarSat1 | red  | na |
| chrUn | 73579845 | 73580823 | 979  | CarSat1 | red  | na |
| chrUn | 73580850 | 73581556 | 707  | CarSat1 | red  | na |
| chrUn | 73581583 | 73582546 | 964  | CarSat1 | red  | na |
| chrUn | 73582571 | 73583497 | 927  | CarSat1 | red  | na |
| chrUn | 73583527 | 73584228 | 702  | CarSat1 | red  | na |
| chrUn | 73584265 | 73585243 | 979  | CarSat1 | red  | na |
| chrUn | 73585270 | 73585979 | 710  | CarSat1 | red  | na |
| chrUn | 73586006 | 73586974 | 969  | CarSat1 | red  | na |
| chrUn | 73586990 | 73587702 | 713  | CarSat1 | red  | na |
| chrUn | 73587727 | 73589431 | 1705 | CarSat1 | red  | na |
| chrUn | 73601789 | 73603606 | 1818 | SAT1_CF | blue | na |
| chrUn | 73603649 | 73604328 | 680  | SAT1_CF | blue | na |
| chrUn | 73604340 | 73605013 | 674  | SAT1_CF | blue | na |
| chrUn | 73605034 | 73605534 | 501  | SAT1_CF | blue | na |
| chrUn | 73605600 | 73605736 | 137  | SAT1_CF | blue | na |
| chrUn | 73605803 | 73606497 | 695  | SAT1_CF | blue | na |
| chrUn | 73606524 | 73607174 | 651  | SAT1_CF | blue | na |
| chrUn | 73607217 | 73607894 | 678  | SAT1_CF | blue | na |
| chrUn | 73607906 | 73608595 | 690  | SAT1_CF | blue | na |
| chrUn | 73608608 | 73609110 | 503  | SAT1_CF | blue | na |
| chrUn | 73609176 | 73609312 | 137  | SAT1_CF | blue | na |
| chrUn | 73609327 | 73609851 | 525  | SAT1_CF | blue | na |
| chrUn | 73609881 | 73611123 | 1243 | SAT1_CF | blue | na |
| chrUn | 73611165 | 73611384 | 220  | SAT1_CF | blue | na |
| chrUn | 73612395 | 73613820 | 1426 | SAT1_CF | blue | na |
| chrUn | 73613847 | 73614434 | 588  | SAT1_CF | blue | na |
| chrUn | 73614452 | 73614964 | 513  | SAT1_CF | blue | na |
| chrUn | 73615042 | 73615587 | 546  | SAT1_CF | blue | na |
| chrUn | 73615600 | 73615707 | 108  | SAT1_CF | blue | na |
| chrUn | 73615729 | 73616303 | 575  | SAT1_CF | blue | na |
| chrUn | 73616315 | 73617831 | 1517 | SAT1_CF | blue | na |
| chrUn | 73617861 | 73618500 | 640  | SAT1_CF | blue | na |
| chrUn | 73618521 | 73619033 | 513  | SAT1_CF | blue | na |
| chrUn | 73619053 | 73619735 | 683  | SAT1_CF | blue | na |
| chrUn | 73619747 | 73621959 | 2213 | SAT1_CF | blue | na |
| chrUn | 73623027 | 73623667 | 641  | CarSat1 | red  | na |

|       |          |          |      |         |        |    |
|-------|----------|----------|------|---------|--------|----|
| chrUn | 73623683 | 73624403 | 721  | CarSat1 | red    | na |
| chrUn | 73624419 | 73625141 | 723  | CarSat1 | red    | na |
| chrUn | 73625157 | 73625869 | 713  | CarSat1 | red    | na |
| chrUn | 73625894 | 73628336 | 2443 | CarSat1 | red    | na |
| chrUn | 73628382 | 73629072 | 691  | CarSat1 | red    | na |
| chrUn | 73629093 | 73629804 | 712  | CarSat1 | red    | na |
| chrUn | 73629831 | 73630291 | 461  | CarSat1 | red    | na |
| chrUn | 73630316 | 73631029 | 714  | CarSat1 | red    | na |
| chrUn | 73631054 | 73631775 | 722  | CarSat1 | red    | na |
| chrUn | 73631800 | 73632558 | 759  | CarSat1 | red    | na |
| chrUn | 73644151 | 73645275 | 1125 | CarSat1 | red    | na |
| chrUn | 73645309 | 73646008 | 700  | CarSat1 | red    | na |
| chrUn | 73646040 | 73646744 | 705  | CarSat1 | red    | na |
| chrUn | 73646778 | 73647479 | 702  | CarSat1 | red    | na |
| chrUn | 73647509 | 73648948 | 1440 | CarSat1 | red    | na |
| chrUn | 73648982 | 73649682 | 701  | CarSat1 | red    | na |
| chrUn | 73649712 | 73651883 | 2172 | CarSat1 | red    | na |
| chrUn | 73651917 | 73652616 | 700  | CarSat1 | red    | na |
| chrUn | 73652646 | 73653721 | 1076 | CarSat1 | red    | na |
| chrUn | 73654723 | 73655503 | 781  | CarSat1 | red    | na |
| chrUn | 73655518 | 73655644 | 127  | Carsat2 | orange | na |
| chrUn | 73655533 | 73656239 | 707  | CarSat1 | red    | na |
| chrUn | 73656254 | 73656381 | 128  | Carsat2 | orange | na |
| chrUn | 73656269 | 73656981 | 713  | CarSat1 | red    | na |
| chrUn | 73656995 | 73657123 | 129  | Carsat2 | orange | na |
| chrUn | 73657011 | 73657718 | 708  | CarSat1 | red    | na |
| chrUn | 73657733 | 73657859 | 127  | Carsat2 | orange | na |
| chrUn | 73657748 | 73658459 | 712  | CarSat1 | red    | na |
| chrUn | 73658489 | 73659196 | 708  | CarSat1 | red    | na |
| chrUn | 73659226 | 73659933 | 708  | CarSat1 | red    | na |
| chrUn | 73659948 | 73660074 | 127  | Carsat2 | orange | na |
| chrUn | 73659963 | 73661406 | 1444 | CarSat1 | red    | na |
| chrUn | 73661436 | 73662143 | 708  | CarSat1 | red    | na |
| chrUn | 73662158 | 73662285 | 128  | Carsat2 | orange | na |
| chrUn | 73662173 | 73664287 | 2115 | CarSat1 | red    | na |
| chrUn | 73665301 | 73667079 | 1779 | CarSat1 | red    | na |
| chrUn | 73667109 | 73670548 | 3440 | CarSat1 | red    | na |
| chrUn | 73670572 | 73672251 | 1680 | CarSat1 | red    | na |
| chrUn | 73672281 | 73673726 | 1446 | CarSat1 | red    | na |
| chrUn | 73673756 | 73674847 | 1092 | CarSat1 | red    | na |
| chrUn | 73687197 | 73689198 | 2002 | CarSat1 | red    | na |
| chrUn | 73689214 | 73693157 | 3944 | CarSat1 | red    | na |

|       |          |          |      |         |     |    |
|-------|----------|----------|------|---------|-----|----|
| chrUn | 73694349 | 73695932 | 1584 | CarSat1 | red | na |
| chrUn | 73697135 | 73698456 | 1322 | CarSat1 | red | na |
| chrUn | 73698483 | 73699017 | 535  | CarSat1 | red | na |
| chrUn | 73710796 | 73711365 | 570  | CarSat1 | red | na |
| chrUn | 73711407 | 73712384 | 978  | CarSat1 | red | na |
| chrUn | 73712406 | 73713575 | 1170 | CarSat1 | red | na |
| chrUn | 73713602 | 73715046 | 1445 | CarSat1 | red | na |
| chrUn | 73715087 | 73715782 | 696  | CarSat1 | red | na |
| chrUn | 73715809 | 73716517 | 709  | CarSat1 | red | na |
| chrUn | 73716544 | 73717988 | 1445 | CarSat1 | red | na |
| chrUn | 73718015 | 73719458 | 1444 | CarSat1 | red | na |
| chrUn | 73719485 | 73720108 | 624  | CarSat1 | red | na |
| chrUn | 73721212 | 73721737 | 526  | CarSat1 | red | na |
| chrUn | 73721767 | 73722474 | 708  | CarSat1 | red | na |
| chrUn | 73722504 | 73723211 | 708  | CarSat1 | red | na |
| chrUn | 73723241 | 73723947 | 707  | CarSat1 | red | na |
| chrUn | 73723977 | 73729367 | 5391 | CarSat1 | red | na |
| chrUn | 73729388 | 73730644 | 1257 | CarSat1 | red | na |
| chrUn | 73731650 | 73732545 | 896  | CarSat1 | red | na |
| chrUn | 73732570 | 73733282 | 713  | CarSat1 | red | na |
| chrUn | 73733298 | 73733767 | 470  | CarSat1 | red | na |
| chrUn | 73733794 | 73734502 | 709  | CarSat1 | red | na |
| chrUn | 73734529 | 73735239 | 711  | CarSat1 | red | na |
| chrUn | 73735266 | 73735976 | 711  | CarSat1 | red | na |
| chrUn | 73736003 | 73737451 | 1449 | CarSat1 | red | na |
| chrUn | 73737478 | 73738440 | 963  | CarSat1 | red | na |
| chrUn | 73738465 | 73739176 | 712  | CarSat1 | red | na |
| chrUn | 73739201 | 73739914 | 714  | CarSat1 | red | na |
| chrUn | 73739930 | 73740399 | 470  | CarSat1 | red | na |
| chrUn | 73740426 | 73741094 | 669  | CarSat1 | red | na |
| chrUn | 73742187 | 73743262 | 1076 | CarSat1 | red | na |
| chrUn | 73743295 | 73743780 | 486  | CarSat1 | red | na |
| chrUn | 73743810 | 73744535 | 726  | CarSat1 | red | na |
| chrUn | 73744550 | 73745276 | 727  | CarSat1 | red | na |
| chrUn | 73745291 | 73746013 | 723  | CarSat1 | red | na |
| chrUn | 73746028 | 73746749 | 722  | CarSat1 | red | na |
| chrUn | 73746764 | 73747693 | 930  | CarSat1 | red | na |
| chrUn | 73747726 | 73748226 | 501  | CarSat1 | red | na |
| chrUn | 73748241 | 73748967 | 727  | CarSat1 | red | na |
| chrUn | 73748982 | 73749932 | 951  | CarSat1 | red | na |
| chrUn | 73749945 | 73751181 | 1237 | CarSat1 | red | na |
| chrUn | 73751196 | 73751659 | 464  | CarSat1 | red | na |



|       |          |          |      |         |        |    |
|-------|----------|----------|------|---------|--------|----|
| chrUn | 73752697 | 73754523 | 1827 | CarSat1 | red    | na |
| chrUn | 73754540 | 73755258 | 719  | CarSat1 | red    | na |
| chrUn | 73755283 | 73755994 | 712  | CarSat1 | red    | na |
| chrUn | 73756019 | 73756488 | 470  | CarSat1 | red    | na |
| chrUn | 73756509 | 73757477 | 969  | CarSat1 | red    | na |
| chrUn | 73757502 | 73758129 | 628  | CarSat1 | red    | na |
| chrUn | 73758265 | 73759137 | 873  | CarSat1 | red    | na |
| chrUn | 73759162 | 73759873 | 712  | CarSat1 | red    | na |
| chrUn | 73759898 | 73760826 | 929  | CarSat1 | red    | na |
| chrUn | 73760863 | 73761570 | 708  | CarSat1 | red    | na |
| chrUn | 73761585 | 73761711 | 127  | Carsat2 | orange | na |
| chrUn | 73761600 | 73762201 | 602  | CarSat1 | red    | na |
| chrUn | 73778059 | 73779528 | 1470 | CarSat1 | red    | na |
| chrUn | 73779549 | 73780265 | 717  | CarSat1 | red    | na |
| chrUn | 73780286 | 73781493 | 1208 | CarSat1 | red    | na |
| chrUn | 73781509 | 73782470 | 962  | CarSat1 | red    | na |
| chrUn | 73782497 | 73783945 | 1449 | CarSat1 | red    | na |
| chrUn | 73783972 | 73784951 | 980  | CarSat1 | red    | na |
| chrUn | 73784981 | 73785421 | 441  | CarSat1 | red    | na |
| chrUn | 73785448 | 73786164 | 717  | CarSat1 | red    | na |
| chrUn | 73786186 | 73787091 | 906  | CarSat1 | red    | na |
| chrUn | 73788099 | 73788197 | 99   | Carsat2 | orange | na |
| chrUn | 73788117 | 73789489 | 1373 | CarSat1 | red    | na |
| chrUn | 73789519 | 73790481 | 963  | CarSat1 | red    | na |
| chrUn | 73790497 | 73792167 | 1671 | CarSat1 | red    | na |
| chrUn | 73792197 | 73792905 | 709  | CarSat1 | red    | na |
| chrUn | 73792920 | 73793047 | 128  | Carsat2 | orange | na |
| chrUn | 73792935 | 73793643 | 709  | CarSat1 | red    | na |
| chrUn | 73793673 | 73794381 | 709  | CarSat1 | red    | na |
| chrUn | 73794411 | 73795249 | 839  | CarSat1 | red    | na |
| chrUn | 73795649 | 73796107 | 459  | CarSat1 | red    | na |
| chrUn | 73796137 | 73797580 | 1444 | CarSat1 | red    | na |
| chrUn | 73809124 | 73809610 | 487  | CarSat1 | red    | na |
| chrUn | 73809643 | 73812042 | 2400 | CarSat1 | red    | na |
| chrUn | 73812064 | 73812189 | 126  | Carsat2 | orange | na |
| chrUn | 73812079 | 73812789 | 711  | CarSat1 | red    | na |
| chrUn | 73812804 | 73812931 | 128  | Carsat2 | orange | na |
| chrUn | 73812819 | 73814269 | 1451 | CarSat1 | red    | na |
| chrUn | 73814299 | 73814785 | 487  | CarSat1 | red    | na |
| chrUn | 73814818 | 73817225 | 2408 | CarSat1 | red    | na |
| chrUn | 73817255 | 73817964 | 710  | CarSat1 | red    | na |
| chrUn | 73817979 | 73818094 | 116  | Carsat2 | orange | na |

|       |          |          |      |         |        |    |
|-------|----------|----------|------|---------|--------|----|
| chrUn | 73817994 | 73818566 | 573  | CarSat1 | red    | na |
| chrUn | 73819570 | 73821011 | 1442 | CarSat1 | red    | na |
| chrUn | 73821027 | 73821748 | 722  | CarSat1 | red    | na |
| chrUn | 73821773 | 73822966 | 1194 | CarSat1 | red    | na |
| chrUn | 73822993 | 73824694 | 1702 | CarSat1 | red    | na |
| chrUn | 73824710 | 73825427 | 718  | CarSat1 | red    | na |
| chrUn | 73825453 | 73826168 | 716  | CarSat1 | red    | na |
| chrUn | 73826193 | 73826905 | 713  | CarSat1 | red    | na |
| chrUn | 73826921 | 73827390 | 470  | CarSat1 | red    | na |
| chrUn | 73827417 | 73828127 | 711  | CarSat1 | red    | na |
| chrUn | 73828154 | 73829031 | 878  | CarSat1 | red    | na |
| chrUn | 73830067 | 73839434 | 9368 | Carsat2 | orange | na |
| chrUn | 73840559 | 73841847 | 1289 | CarSat1 | red    | na |
| chrUn | 73841874 | 73842584 | 711  | CarSat1 | red    | na |
| chrUn | 73842605 | 73843049 | 445  | CarSat1 | red    | na |
| chrUn | 73843079 | 73844288 | 1210 | CarSat1 | red    | na |
| chrUn | 73844324 | 73845781 | 1458 | CarSat1 | red    | na |
| chrUn | 73845797 | 73847014 | 1218 | CarSat1 | red    | na |
| chrUn | 73847041 | 73847750 | 710  | CarSat1 | red    | na |
| chrUn | 73847777 | 73848484 | 708  | CarSat1 | red    | na |
| chrUn | 73848515 | 73849226 | 712  | CarSat1 | red    | na |
| chrUn | 73849253 | 73850018 | 766  | CarSat1 | red    | na |
| chrUn | 73855881 | 73856834 | 954  | CarSat1 | red    | na |
| chrUn | 73856994 | 73857639 | 646  | CarSat1 | red    | na |
| chrUn | 73857720 | 73858576 | 857  | CarSat1 | red    | na |
| chrUn | 73858725 | 73860174 | 1450 | CarSat1 | red    | na |
| chrUn | 73860326 | 73860499 | 174  | CarSat1 | red    | na |
| chrUn | 73882785 | 73883690 | 906  | CarSat1 | red    | na |
| chrUn | 73883705 | 73884431 | 727  | CarSat1 | red    | na |
| chrUn | 73884446 | 73885903 | 1458 | CarSat1 | red    | na |
| chrUn | 73885918 | 73886624 | 707  | CarSat1 | red    | na |
| chrUn | 73886654 | 73887377 | 724  | CarSat1 | red    | na |
| chrUn | 73887392 | 73887848 | 457  | CarSat1 | red    | na |
| chrUn | 73887861 | 73888837 | 977  | CarSat1 | red    | na |
| chrUn | 73888867 | 73889574 | 708  | CarSat1 | red    | na |
| chrUn | 73889604 | 73890311 | 708  | CarSat1 | red    | na |
| chrUn | 73890341 | 73891568 | 1228 | CarSat1 | red    | na |
| chrUn | 73891756 | 73892230 | 475  | CarSat1 | red    | na |
| chrUn | 73902699 | 73903412 | 714  | SAT1_CF | blue   | na |
| chrUn | 73903456 | 73904862 | 1407 | SAT1_CF | blue   | na |
| chrUn | 73904888 | 73905478 | 591  | SAT1_CF | blue   | na |
| chrUn | 73905505 | 73906639 | 1135 | SAT1_CF | blue   | na |

|       |          |          |              |        |    |
|-------|----------|----------|--------------|--------|----|
| chrUn | 73906651 | 73907184 | 534 SAT1_CF  | blue   | na |
| chrUn | 73907212 | 73907844 | 633 SAT1_CF  | blue   | na |
| chrUn | 73907886 | 73908784 | 899 SAT1_CF  | blue   | na |
| chrUn | 73910229 | 73910923 | 695 SAT1_CF  | blue   | na |
| chrUn | 73910936 | 73911252 | 317 SAT1_CF  | blue   | na |
| chrUn | 73912970 | 73913596 | 627 SAT1_CF  | blue   | na |
| chrUn | 73913675 | 73914218 | 544 SAT1_CF  | blue   | na |
| chrUn | 73914260 | 73914855 | 596 SAT1_CF  | blue   | na |
| chrUn | 73915862 | 73916756 | 895 CarSat1  | red    | na |
| chrUn | 73916772 | 73917733 | 962 CarSat1  | red    | na |
| chrUn | 73917760 | 73919205 | 1446 CarSat1 | red    | na |
| chrUn | 73919232 | 73919692 | 461 CarSat1  | red    | na |
| chrUn | 73919717 | 73920679 | 963 CarSat1  | red    | na |
| chrUn | 73920706 | 73922153 | 1448 CarSat1 | red    | na |
| chrUn | 73922180 | 73922889 | 710 CarSat1  | red    | na |
| chrUn | 73922916 | 73924112 | 1197 CarSat1 | red    | na |
| chrUn | 73924137 | 73925300 | 1164 CarSat1 | red    | na |
| chrUn | 73926301 | 73929602 | 3302 CarSat1 | red    | na |
| chrUn | 73929617 | 73929744 | 128 Carsat2  | orange | na |
| chrUn | 73929632 | 73931075 | 1444 CarSat1 | red    | na |
| chrUn | 73931105 | 73932549 | 1445 CarSat1 | red    | na |
| chrUn | 73932564 | 73932690 | 127 Carsat2  | orange | na |
| chrUn | 73932579 | 73935032 | 2454 CarSat1 | red    | na |
| chrUn | 73935053 | 73935740 | 688 CarSat1  | red    | na |
| chrUn | 73936740 | 73937578 | 839 CarSat1  | red    | na |
| chrUn | 73937599 | 73942467 | 4869 CarSat1 | red    | na |
| chrUn | 73942482 | 73942605 | 124 Carsat2  | orange | na |
| chrUn | 73942497 | 73945639 | 3143 CarSat1 | red    | na |
| chrUn | 73945831 | 73946172 | 342 CarSat1  | red    | na |
| chrUn | 73964057 | 73965876 | 1820 CarSat1 | red    | na |
| chrUn | 73965900 | 73967594 | 1695 CarSat1 | red    | na |
| chrUn | 73967621 | 73968824 | 1204 CarSat1 | red    | na |
| chrUn | 73968848 | 73969565 | 718 CarSat1  | red    | na |
| chrUn | 73969589 | 73970826 | 1238 CarSat1 | red    | na |
| chrUn | 73970842 | 73973431 | 2590 CarSat1 | red    | na |
| chrUn | 73990085 | 73991229 | 1145 CarSat1 | red    | na |
| chrUn | 73991259 | 73992182 | 924 CarSat1  | red    | na |
| chrUn | 73992207 | 73992980 | 774 CarSat1  | red    | na |
| chrUn | 73995485 | 73997029 | 1545 CarSat1 | red    | na |
| chrUn | 73998064 | 73998948 | 885 CarSat1  | red    | na |
| chrUn | 73998974 | 73999927 | 954 CarSat1  | red    | na |
| chrUn | 73999948 | 74000665 | 718 CarSat1  | red    | na |

|       |          |          |      |         |     |    |
|-------|----------|----------|------|---------|-----|----|
| chrUn | 74000712 | 74001680 | 969  | CarSat1 | red | na |
| chrUn | 74001695 | 74003379 | 1685 | CarSat1 | red | na |
| chrUn | 74003400 | 74004607 | 1208 | CarSat1 | red | na |
| chrUn | 74004632 | 74005584 | 953  | CarSat1 | red | na |
| chrUn | 74005611 | 74007471 | 1861 | CarSat1 | red | na |
| chrUn | 74008486 | 74010976 | 2491 | CarSat1 | red | na |
| chrUn | 74011010 | 74011722 | 713  | CarSat1 | red | na |
| chrUn | 74011738 | 74012700 | 963  | CarSat1 | red | na |
| chrUn | 74012727 | 74013437 | 711  | CarSat1 | red | na |
| chrUn | 74013464 | 74014173 | 710  | CarSat1 | red | na |
| chrUn | 74014201 | 74015408 | 1208 | CarSat1 | red | na |
| chrUn | 74015424 | 74017879 | 2456 | CarSat1 | red | na |
| chrUn | 74018887 | 74019834 | 948  | CarSat1 | red | na |
| chrUn | 74019861 | 74020840 | 980  | CarSat1 | red | na |
| chrUn | 74020870 | 74021578 | 709  | CarSat1 | red | na |
| chrUn | 74021608 | 74023521 | 1914 | CarSat1 | red | na |
| chrUn | 74023548 | 74024259 | 712  | CarSat1 | red | na |
| chrUn | 74024286 | 74028293 | 4008 | CarSat1 | red | na |
| chrUn | 74029300 | 74030102 | 803  | CarSat1 | red | na |
| chrUn | 74030129 | 74035014 | 4886 | CarSat1 | red | na |
| chrUn | 74035030 | 74035752 | 723  | CarSat1 | red | na |
| chrUn | 74035768 | 74036489 | 722  | CarSat1 | red | na |
| chrUn | 74036505 | 74037468 | 964  | CarSat1 | red | na |
| chrUn | 74037495 | 74038205 | 711  | CarSat1 | red | na |
| chrUn | 74038232 | 74038691 | 460  | CarSat1 | red | na |
| chrUn | 74039719 | 74040446 | 728  | CarSat1 | red | na |
| chrUn | 74040462 | 74041182 | 721  | CarSat1 | red | na |
| chrUn | 74041197 | 74041922 | 726  | CarSat1 | red | na |
| chrUn | 74041938 | 74042660 | 723  | CarSat1 | red | na |
| chrUn | 74042675 | 74044351 | 1677 | CarSat1 | red | na |
| chrUn | 74044375 | 74045596 | 1222 | CarSat1 | red | na |
| chrUn | 74045626 | 74046580 | 955  | CarSat1 | red | na |
| chrUn | 74046592 | 74047831 | 1240 | CarSat1 | red | na |
| chrUn | 74047846 | 74049023 | 1178 | CarSat1 | red | na |
| chrUn | 74050088 | 74051161 | 1074 | CarSat1 | red | na |
| chrUn | 74051188 | 74052636 | 1449 | CarSat1 | red | na |
| chrUn | 74052663 | 74053376 | 714  | CarSat1 | red | na |
| chrUn | 74053404 | 74054115 | 712  | CarSat1 | red | na |
| chrUn | 74054142 | 74054853 | 712  | CarSat1 | red | na |
| chrUn | 74054880 | 74055349 | 470  | CarSat1 | red | na |
| chrUn | 74055365 | 74056328 | 964  | CarSat1 | red | na |
| chrUn | 74056355 | 74058535 | 2181 | CarSat1 | red | na |

|       |          |          |      |         |      |    |
|-------|----------|----------|------|---------|------|----|
| chrUn | 74058562 | 74059452 | 891  | CarSat1 | red  | na |
| chrUn | 74060497 | 74061206 | 710  | CarSat1 | red  | na |
| chrUn | 74061233 | 74061942 | 710  | CarSat1 | red  | na |
| chrUn | 74061969 | 74062931 | 963  | CarSat1 | red  | na |
| chrUn | 74062947 | 74063415 | 469  | CarSat1 | red  | na |
| chrUn | 74063442 | 74064891 | 1450 | CarSat1 | red  | na |
| chrUn | 74064918 | 74065633 | 716  | CarSat1 | red  | na |
| chrUn | 74065660 | 74066371 | 712  | CarSat1 | red  | na |
| chrUn | 74066398 | 74067109 | 712  | CarSat1 | red  | na |
| chrUn | 74067136 | 74068097 | 962  | CarSat1 | red  | na |
| chrUn | 74068113 | 74068832 | 720  | CarSat1 | red  | na |
| chrUn | 74068857 | 74069835 | 979  | CarSat1 | red  | na |
| chrUn | 74082988 | 74084235 | 1248 | CarSat1 | red  | na |
| chrUn | 74084262 | 74085225 | 964  | CarSat1 | red  | na |
| chrUn | 74085241 | 74085705 | 465  | CarSat1 | red  | na |
| chrUn | 74085736 | 74086176 | 441  | CarSat1 | red  | na |
| chrUn | 74086206 | 74087185 | 980  | CarSat1 | red  | na |
| chrUn | 74087212 | 74089122 | 1911 | CarSat1 | red  | na |
| chrUn | 74089152 | 74090193 | 1042 | CarSat1 | red  | na |
| chrUn | 74090257 | 74090900 | 644  | CarSat1 | red  | na |
| chrUn | 74091060 | 74092339 | 1280 | CarSat1 | red  | na |
| chrUn | 74093348 | 74094635 | 1288 | CarSat1 | red  | na |
| chrUn | 74094662 | 74095624 | 963  | CarSat1 | red  | na |
| chrUn | 74095640 | 74097836 | 2197 | CarSat1 | red  | na |
| chrUn | 74097852 | 74099043 | 1192 | CarSat1 | red  | na |
| chrUn | 74099085 | 74099794 | 710  | CarSat1 | red  | na |
| chrUn | 74099821 | 74102698 | 2878 | CarSat1 | red  | na |
| chrUn | 74103717 | 74103872 | 156  | SAT1_CF | blue | na |
| chrUn | 74103917 | 74104418 | 502  | SAT1_CF | blue | na |
| chrUn | 74104445 | 74105877 | 1433 | SAT1_CF | blue | na |
| chrUn | 74105925 | 74107189 | 1265 | SAT1_CF | blue | na |
| chrUn | 74107232 | 74107756 | 525  | SAT1_CF | blue | na |
| chrUn | 74107771 | 74107907 | 137  | SAT1_CF | blue | na |
| chrUn | 74107973 | 74108475 | 503  | SAT1_CF | blue | na |
| chrUn | 74108488 | 74109816 | 1329 | SAT1_CF | blue | na |
| chrUn | 74109830 | 74110462 | 633  | SAT1_CF | blue | na |
| chrUn | 74110505 | 74111052 | 548  | SAT1_CF | blue | na |
| chrUn | 74111080 | 74111783 | 704  | SAT1_CF | blue | na |
| chrUn | 74111809 | 74112479 | 671  | SAT1_CF | blue | na |
| chrUn | 74112491 | 74113064 | 574  | SAT1_CF | blue | na |
| chrUn | 74114073 | 74114631 | 559  | CarSat1 | red  | na |
| chrUn | 74114661 | 74117083 | 2423 | CarSat1 | red  | na |

|       |          |          |      |         |        |    |
|-------|----------|----------|------|---------|--------|----|
| chrUn | 74117122 | 74118087 | 966  | CarSat1 | red    | na |
| chrUn | 74118111 | 74118827 | 717  | CarSat1 | red    | na |
| chrUn | 74118851 | 74120305 | 1455 | CarSat1 | red    | na |
| chrUn | 74120321 | 74121521 | 1201 | CarSat1 | red    | na |
| chrUn | 74121548 | 74122259 | 712  | CarSat1 | red    | na |
| chrUn | 74122286 | 74123423 | 1138 | CarSat1 | red    | na |
| chrUn | 74124439 | 74126699 | 2261 | CarSat1 | red    | na |
| chrUn | 74126733 | 74128666 | 1934 | CarSat1 | red    | na |
| chrUn | 74128687 | 74130383 | 1697 | CarSat1 | red    | na |
| chrUn | 74130408 | 74130877 | 470  | CarSat1 | red    | na |
| chrUn | 74130898 | 74131866 | 969  | CarSat1 | red    | na |
| chrUn | 74131891 | 74132597 | 707  | CarSat1 | red    | na |
| chrUn | 74132633 | 74133066 | 434  | CarSat1 | red    | na |
| chrUn | 74133114 | 74133771 | 658  | CarSat1 | red    | na |
| chrUn | 74148558 | 74149184 | 627  | CarSat1 | red    | na |
| chrUn | 74149214 | 74150148 | 935  | CarSat1 | red    | na |
| chrUn | 74150173 | 74151393 | 1221 | CarSat1 | red    | na |
| chrUn | 74151423 | 74152130 | 708  | CarSat1 | red    | na |
| chrUn | 74152160 | 74153820 | 1661 | CarSat1 | red    | na |
| chrUn | 74153846 | 74157831 | 3986 | CarSat1 | red    | na |
| chrUn | 74158864 | 74159775 | 912  | CarSat1 | red    | na |
| chrUn | 74159796 | 74161249 | 1454 | CarSat1 | red    | na |
| chrUn | 74161270 | 74162963 | 1694 | CarSat1 | red    | na |
| chrUn | 74162988 | 74165171 | 2184 | CarSat1 | red    | na |
| chrUn | 74165196 | 74167383 | 2188 | CarSat1 | red    | na |
| chrUn | 74167408 | 74168177 | 770  | CarSat1 | red    | na |
| chrUn | 74170117 | 74170516 | 400  | Sat2CF  | purple | na |
| chrUn | 74170197 | 74170762 | 566  | Sat2CF  | purple | na |
| chrUn | 74170611 | 74170779 | 169  | Sat2CF  | purple | na |
| chrUn | 74175443 | 74175612 | 170  | SAT1_CF | blue   | na |
| chrUn | 74189879 | 74191958 | 2080 | CarSat1 | red    | na |
| chrUn | 74191970 | 74192471 | 502  | CarSat1 | red    | na |
| chrUn | 74192486 | 74193946 | 1461 | CarSat1 | red    | na |
| chrUn | 74193961 | 74194887 | 927  | CarSat1 | red    | na |
| chrUn | 74194920 | 74195421 | 502  | CarSat1 | red    | na |
| chrUn | 74195436 | 74196162 | 727  | CarSat1 | red    | na |
| chrUn | 74196177 | 74197631 | 1455 | CarSat1 | red    | na |
| chrUn | 74197661 | 74198383 | 723  | CarSat1 | red    | na |
| chrUn | 74198398 | 74199183 | 786  | CarSat1 | red    | na |
| chrUn | 74223926 | 74224530 | 605  | CarSat1 | red    | na |
| chrUn | 74224551 | 74225511 | 961  | CarSat1 | red    | na |
| chrUn | 74225536 | 74226244 | 709  | CarSat1 | red    | na |

|       |          |          |      |         |     |    |
|-------|----------|----------|------|---------|-----|----|
| chrUn | 74226269 | 74226989 | 721  | CarSat1 | red | na |
| chrUn | 74227015 | 74228212 | 1198 | CarSat1 | red | na |
| chrUn | 74228239 | 74229201 | 963  | CarSat1 | red | na |
| chrUn | 74229226 | 74230424 | 1199 | CarSat1 | red | na |
| chrUn | 74230446 | 74231160 | 715  | CarSat1 | red | na |
| chrUn | 74231181 | 74231896 | 716  | CarSat1 | red | na |
| chrUn | 74231917 | 74233242 | 1326 | CarSat1 | red | na |
| chrUn | 74234253 | 74235057 | 805  | CarSat1 | red | na |
| chrUn | 74235094 | 74235578 | 485  | CarSat1 | red | na |
| chrUn | 74235603 | 74236802 | 1200 | CarSat1 | red | na |
| chrUn | 74236823 | 74240003 | 3181 | CarSat1 | red | na |
| chrUn | 74240029 | 74241223 | 1195 | CarSat1 | red | na |
| chrUn | 74241250 | 74241960 | 711  | CarSat1 | red | na |
| chrUn | 74241987 | 74242696 | 710  | CarSat1 | red | na |
| chrUn | 74242723 | 74243560 | 838  | CarSat1 | red | na |
| chrUn | 74244569 | 74246183 | 1615 | CarSat1 | red | na |
| chrUn | 74246208 | 74247405 | 1198 | CarSat1 | red | na |
| chrUn | 74247432 | 74248383 | 952  | CarSat1 | red | na |
| chrUn | 74248408 | 74252555 | 4148 | CarSat1 | red | na |
| chrUn | 74252582 | 74253864 | 1283 | CarSat1 | red | na |
| chrUn | 74279893 | 74280926 | 1034 | CarSat1 | red | na |
| chrUn | 74280953 | 74282885 | 1933 | CarSat1 | red | na |
| chrUn | 74282901 | 74283864 | 964  | CarSat1 | red | na |
| chrUn | 74283891 | 74287307 | 3417 | CarSat1 | red | na |
| chrUn | 74287323 | 74288043 | 721  | CarSat1 | red | na |
| chrUn | 74288059 | 74289157 | 1099 | CarSat1 | red | na |
| chrUn | 74290183 | 74292131 | 1949 | CarSat1 | red | na |
| chrUn | 74292153 | 74295360 | 3208 | CarSat1 | red | na |
| chrUn | 74295375 | 74296082 | 708  | CarSat1 | red | na |
| chrUn | 74296112 | 74297573 | 1462 | CarSat1 | red | na |
| chrUn | 74297588 | 74299455 | 1868 | CarSat1 | red | na |
| chrUn | 74300463 | 74303518 | 3056 | CarSat1 | red | na |
| chrUn | 74303548 | 74304483 | 936  | CarSat1 | red | na |
| chrUn | 74304500 | 74304988 | 489  | CarSat1 | red | na |
| chrUn | 74305018 | 74305727 | 710  | CarSat1 | red | na |
| chrUn | 74305758 | 74307200 | 1443 | CarSat1 | red | na |
| chrUn | 74307230 | 74309717 | 2488 | CarSat1 | red | na |
| chrUn | 74310744 | 74312576 | 1833 | CarSat1 | red | na |
| chrUn | 74312603 | 74313313 | 711  | CarSat1 | red | na |
| chrUn | 74313340 | 74315285 | 1946 | CarSat1 | red | na |
| chrUn | 74315310 | 74316262 | 953  | CarSat1 | red | na |
| chrUn | 74316289 | 74318474 | 2186 | CarSat1 | red | na |

|       |          |          |      |         |        |    |
|-------|----------|----------|------|---------|--------|----|
| chrUn | 74318501 | 74319480 | 980  | CarSat1 | red    | na |
| chrUn | 74319510 | 74319988 | 479  | CarSat1 | red    | na |
| chrUn | 74321032 | 74322099 | 1068 | CarSat1 | red    | na |
| chrUn | 74322129 | 74322835 | 707  | CarSat1 | red    | na |
| chrUn | 74322865 | 74324317 | 1453 | CarSat1 | red    | na |
| chrUn | 74324345 | 74325053 | 709  | CarSat1 | red    | na |
| chrUn | 74325067 | 74325194 | 128  | Carsat2 | orange | na |
| chrUn | 74325082 | 74326527 | 1446 | CarSat1 | red    | na |
| chrUn | 74326542 | 74326669 | 128  | Carsat2 | orange | na |
| chrUn | 74326557 | 74328524 | 1968 | CarSat1 | red    | na |
| chrUn | 74328549 | 74329252 | 704  | CarSat1 | red    | na |
| chrUn | 74329269 | 74330292 | 1024 | CarSat1 | red    | na |
| chrUn | 74342291 | 74342891 | 601  | CarSat1 | red    | na |
| chrUn | 74342918 | 74343629 | 712  | CarSat1 | red    | na |
| chrUn | 74343650 | 74345343 | 1694 | CarSat1 | red    | na |
| chrUn | 74345368 | 74346575 | 1208 | CarSat1 | red    | na |
| chrUn | 74346602 | 74347042 | 441  | CarSat1 | red    | na |
| chrUn | 74347072 | 74349247 | 2176 | CarSat1 | red    | na |
| chrUn | 74349277 | 74350256 | 980  | CarSat1 | red    | na |
| chrUn | 74350283 | 74350843 | 561  | CarSat1 | red    | na |
| chrUn | 74364191 | 74366479 | 2289 | CarSat1 | red    | na |
| chrUn | 74366506 | 74367218 | 713  | CarSat1 | red    | na |
| chrUn | 74367245 | 74368450 | 1206 | CarSat1 | red    | na |
| chrUn | 74368466 | 74369427 | 962  | CarSat1 | red    | na |
| chrUn | 74369454 | 74371905 | 2452 | CarSat1 | red    | na |
| chrUn | 74371943 | 74373356 | 1414 | CarSat1 | red    | na |
| chrUn | 74374453 | 74375401 | 949  | CarSat1 | red    | na |
| chrUn | 74375428 | 74378087 | 2660 | CarSat1 | red    | na |
| chrUn | 74378102 | 74378229 | 128  | Carsat2 | orange | na |
| chrUn | 74378117 | 74379833 | 1717 | CarSat1 | red    | na |
| chrUn | 74379860 | 74381308 | 1449 | CarSat1 | red    | na |
| chrUn | 74381335 | 74382780 | 1446 | CarSat1 | red    | na |
| chrUn | 74382807 | 74383684 | 878  | CarSat1 | red    | na |
| chrUn | 74384719 | 74386422 | 1704 | SAT1_CF | blue   | na |
| chrUn | 74386460 | 74386960 | 501  | SAT1_CF | blue   | na |
| chrUn | 74386973 | 74388195 | 1223 | SAT1_CF | blue   | na |
| chrUn | 74388207 | 74388851 | 645  | SAT1_CF | blue   | na |
| chrUn | 74388895 | 74390194 | 1300 | SAT1_CF | blue   | na |
| chrUn | 74390236 | 74390344 | 109  | SAT1_CF | blue   | na |
| chrUn | 74390389 | 74391344 | 956  | SAT1_CF | blue   | na |
| chrUn | 74391366 | 74393968 | 2603 | SAT1_CF | blue   | na |
| chrUn | 74394990 | 74398105 | 3116 | CarSat1 | red    | na |



|       |          |          |              |        |    |
|-------|----------|----------|--------------|--------|----|
| chrUn | 74398132 | 74398843 | 712 CarSat1  | red    | na |
| chrUn | 74398870 | 74399580 | 711 CarSat1  | red    | na |
| chrUn | 74399607 | 74400320 | 714 CarSat1  | red    | na |
| chrUn | 74400345 | 74401056 | 712 CarSat1  | red    | na |
| chrUn | 74401082 | 74401793 | 712 CarSat1  | red    | na |
| chrUn | 74401819 | 74402530 | 712 CarSat1  | red    | na |
| chrUn | 74402557 | 74403269 | 713 CarSat1  | red    | na |
| chrUn | 74403295 | 74404174 | 880 CarSat1  | red    | na |
| chrUn | 74405247 | 74406296 | 1050 CarSat1 | red    | na |
| chrUn | 74408471 | 74410397 | 1927 CarSat1 | red    | na |
| chrUn | 74410633 | 74412442 | 1810 CarSat1 | red    | na |
| chrUn | 74412467 | 74413138 | 672 CarSat1  | red    | na |
| chrUn | 74414404 | 74414881 | 478 CarSat1  | red    | na |
| chrUn | 74414908 | 74415995 | 1088 CarSat1 | red    | na |
| chrUn | 74416022 | 74416490 | 469 CarSat1  | red    | na |
| chrUn | 74416515 | 74418087 | 1573 CarSat1 | red    | na |
| chrUn | 74429358 | 74430333 | 976 CarSat1  | red    | na |
| chrUn | 74430363 | 74431317 | 955 CarSat1  | red    | na |
| chrUn | 74431342 | 74433738 | 2397 CarSat1 | red    | na |
| chrUn | 74433775 | 74438021 | 4247 CarSat1 | red    | na |
| chrUn | 74439540 | 74440168 | 629 CarSat1  | red    | na |
| chrUn | 74440193 | 74441145 | 953 CarSat1  | red    | na |
| chrUn | 74441172 | 74442887 | 1716 CarSat1 | red    | na |
| chrUn | 74442917 | 74444094 | 1178 CarSat1 | red    | na |
| chrUn | 74444121 | 74445836 | 1716 CarSat1 | red    | na |
| chrUn | 74445866 | 74446574 | 709 CarSat1  | red    | na |
| chrUn | 74446604 | 74447312 | 709 CarSat1  | red    | na |
| chrUn | 74447342 | 74447782 | 441 CarSat1  | red    | na |
| chrUn | 74447809 | 74448755 | 947 CarSat1  | red    | na |
| chrUn | 74449797 | 74449941 | 145 Carsat2  | orange | na |
| chrUn | 74449813 | 74450330 | 518 CarSat1  | red    | na |
| chrUn | 74450357 | 74451068 | 712 CarSat1  | red    | na |
| chrUn | 74451093 | 74453280 | 2188 CarSat1 | red    | na |
| chrUn | 74453307 | 74457218 | 3912 CarSat1 | red    | na |
| chrUn | 74457234 | 74457956 | 723 CarSat1  | red    | na |
| chrUn | 74457981 | 74458504 | 524 CarSat1  | red    | na |
| chrUn | 74470220 | 74470890 | 671 CarSat1  | red    | na |
| chrUn | 74470911 | 74472112 | 1202 CarSat1 | red    | na |
| chrUn | 74472145 | 74473596 | 1452 CarSat1 | red    | na |
| chrUn | 74473628 | 74474128 | 501 CarSat1  | red    | na |
| chrUn | 74474143 | 74475067 | 925 CarSat1  | red    | na |
| chrUn | 74475100 | 74475600 | 501 CarSat1  | red    | na |

|       |          |          |      |         |        |    |
|-------|----------|----------|------|---------|--------|----|
| chrUn | 74475615 | 74476324 | 710  | CarSat1 | red    | na |
| chrUn | 74476354 | 74477075 | 722  | CarSat1 | red    | na |
| chrUn | 74477090 | 74477812 | 723  | CarSat1 | red    | na |
| chrUn | 74477827 | 74478759 | 933  | CarSat1 | red    | na |
| chrUn | 74478793 | 74479382 | 590  | CarSat1 | red    | na |
| chrUn | 74480388 | 74481543 | 1156 | CarSat1 | red    | na |
| chrUn | 74481570 | 74482278 | 709  | CarSat1 | red    | na |
| chrUn | 74482305 | 74483017 | 713  | CarSat1 | red    | na |
| chrUn | 74483044 | 74483760 | 717  | CarSat1 | red    | na |
| chrUn | 74483787 | 74484499 | 713  | CarSat1 | red    | na |
| chrUn | 74484526 | 74488918 | 4393 | CarSat1 | red    | na |
| chrUn | 74488948 | 74489574 | 627  | CarSat1 | red    | na |
| chrUn | 74490590 | 74492210 | 1621 | CarSat1 | red    | na |
| chrUn | 74492231 | 74492939 | 709  | CarSat1 | red    | na |
| chrUn | 74492966 | 74494900 | 1935 | CarSat1 | red    | na |
| chrUn | 74494925 | 74496894 | 1970 | CarSat1 | red    | na |
| chrUn | 74496924 | 74498587 | 1664 | CarSat1 | red    | na |
| chrUn | 74498612 | 74499772 | 1161 | CarSat1 | red    | na |
| chrUn | 74510976 | 74512420 | 1445 | CarSat1 | red    | na |
| chrUn | 74512441 | 74513433 | 993  | CarSat1 | red    | na |
| chrUn | 74513448 | 74514174 | 727  | CarSat1 | red    | na |
| chrUn | 74514189 | 74515065 | 877  | CarSat1 | red    | na |
| chrUn | 74515285 | 74516620 | 1336 | CarSat1 | red    | na |
| chrUn | 74516635 | 74517357 | 723  | CarSat1 | red    | na |
| chrUn | 74517372 | 74519552 | 2181 | CarSat1 | red    | na |
| chrUn | 74519582 | 74520143 | 562  | CarSat1 | red    | na |
| chrUn | 74521156 | 74528050 | 6895 | CarSat1 | red    | na |
| chrUn | 74528075 | 74529027 | 953  | CarSat1 | red    | na |
| chrUn | 74529054 | 74530308 | 1255 | CarSat1 | red    | na |
| chrUn | 74531348 | 74534756 | 3409 | CarSat1 | red    | na |
| chrUn | 74534781 | 74537703 | 2923 | CarSat1 | red    | na |
| chrUn | 74537728 | 74538691 | 964  | CarSat1 | red    | na |
| chrUn | 74538718 | 74539517 | 800  | CarSat1 | red    | na |
| chrUn | 74539538 | 74540482 | 945  | CarSat1 | red    | na |
| chrUn | 74541494 | 74542016 | 523  | CarSat1 | red    | na |
| chrUn | 74542041 | 74542763 | 723  | CarSat1 | red    | na |
| chrUn | 74542788 | 74543739 | 952  | CarSat1 | red    | na |
| chrUn | 74543766 | 74547906 | 4141 | CarSat1 | red    | na |
| chrUn | 74547931 | 74549622 | 1692 | CarSat1 | red    | na |
| chrUn | 74549649 | 74550626 | 978  | CarSat1 | red    | na |
| chrUn | 74561811 | 74562706 | 896  | CarSat1 | red    | na |
| chrUn | 74562721 | 74562847 | 127  | Carsat2 | orange | na |

|       |          |          |      |         |        |    |
|-------|----------|----------|------|---------|--------|----|
| chrUn | 74562736 | 74563711 | 976  | CarSat1 | red    | na |
| chrUn | 74563738 | 74565651 | 1914 | CarSat1 | red    | na |
| chrUn | 74565666 | 74565793 | 128  | Carsat2 | orange | na |
| chrUn | 74565681 | 74566659 | 979  | CarSat1 | red    | na |
| chrUn | 74566686 | 74567638 | 953  | CarSat1 | red    | na |
| chrUn | 74567663 | 74570955 | 3293 | CarSat1 | red    | na |
| chrUn | 74595273 | 74595749 | 477  | CarSat1 | red    | na |
| chrUn | 74595779 | 74599204 | 3426 | CarSat1 | red    | na |
| chrUn | 74599237 | 74600434 | 1198 | CarSat1 | red    | na |
| chrUn | 74600461 | 74601424 | 964  | CarSat1 | red    | na |
| chrUn | 74601449 | 74602371 | 923  | CarSat1 | red    | na |
| chrUn | 74602408 | 74604375 | 1968 | CarSat1 | red    | na |
| chrUn | 74605414 | 74607232 | 1819 | CarSat1 | red    | na |
| chrUn | 74607247 | 74608690 | 1444 | CarSat1 | red    | na |
| chrUn | 74608727 | 74609160 | 434  | CarSat1 | red    | na |
| chrUn | 74609187 | 74609897 | 711  | CarSat1 | red    | na |
| chrUn | 74609922 | 74610904 | 983  | CarSat1 | red    | na |
| chrUn | 74610934 | 74611858 | 925  | CarSat1 | red    | na |
| chrUn | 74611891 | 74613336 | 1446 | CarSat1 | red    | na |
| chrUn | 74613369 | 74613855 | 487  | CarSat1 | red    | na |
| chrUn | 74613885 | 74614525 | 641  | CarSat1 | red    | na |
| chrUn | 74615554 | 74616236 | 683  | CarSat1 | red    | na |
| chrUn | 74616260 | 74617212 | 953  | CarSat1 | red    | na |
| chrUn | 74617239 | 74619920 | 2682 | CarSat1 | red    | na |
| chrUn | 74619945 | 74621634 | 1690 | CarSat1 | red    | na |
| chrUn | 74621661 | 74622372 | 712  | CarSat1 | red    | na |
| chrUn | 74622399 | 74622868 | 470  | CarSat1 | red    | na |
| chrUn | 74622893 | 74623605 | 713  | CarSat1 | red    | na |
| chrUn | 74623629 | 74624664 | 1036 | CarSat1 | red    | na |
| chrUn | 74638818 | 74639858 | 1041 | CarSat1 | red    | na |
| chrUn | 74639888 | 74640596 | 709  | CarSat1 | red    | na |
| chrUn | 74640626 | 74641803 | 1178 | CarSat1 | red    | na |
| chrUn | 74641830 | 74642540 | 711  | CarSat1 | red    | na |
| chrUn | 74642567 | 74643276 | 710  | CarSat1 | red    | na |
| chrUn | 74643303 | 74645488 | 2186 | CarSat1 | red    | na |
| chrUn | 74645515 | 74646226 | 712  | CarSat1 | red    | na |
| chrUn | 74646253 | 74646964 | 712  | CarSat1 | red    | na |
| chrUn | 74646991 | 74647899 | 909  | CarSat1 | red    | na |
| chrUn | 74648914 | 74651140 | 2227 | CarSat1 | red    | na |
| chrUn | 74651167 | 74651877 | 711  | CarSat1 | red    | na |
| chrUn | 74651904 | 74652612 | 709  | CarSat1 | red    | na |
| chrUn | 74652639 | 74653346 | 708  | CarSat1 | red    | na |

|       |          |          |      |         |        |    |
|-------|----------|----------|------|---------|--------|----|
| chrUn | 74653373 | 74654082 | 710  | CarSat1 | red    | na |
| chrUn | 74654109 | 74657525 | 3417 | CarSat1 | red    | na |
| chrUn | 74657550 | 74658032 | 483  | CarSat1 | red    | na |
| chrUn | 74669169 | 74670248 | 1080 | CarSat1 | red    | na |
| chrUn | 74670273 | 74671722 | 1450 | CarSat1 | red    | na |
| chrUn | 74671747 | 74672450 | 704  | CarSat1 | red    | na |
| chrUn | 74672475 | 74674179 | 1705 | CarSat1 | red    | na |
| chrUn | 74674204 | 74675134 | 931  | CarSat1 | red    | na |
| chrUn | 74675350 | 74678266 | 2917 | CarSat1 | red    | na |
| chrUn | 74729487 | 74730644 | 1158 | CarSat1 | red    | na |
| chrUn | 74730671 | 74734089 | 3419 | CarSat1 | red    | na |
| chrUn | 74734105 | 74735563 | 1459 | CarSat1 | red    | na |
| chrUn | 74735588 | 74736300 | 713  | CarSat1 | red    | na |
| chrUn | 74736316 | 74737280 | 965  | CarSat1 | red    | na |
| chrUn | 74737307 | 74738018 | 712  | CarSat1 | red    | na |
| chrUn | 74738045 | 74738578 | 534  | CarSat1 | red    | na |
| chrUn | 74739583 | 74740623 | 1041 | CarSat1 | red    | na |
| chrUn | 74740650 | 74741856 | 1207 | CarSat1 | red    | na |
| chrUn | 74741872 | 74742588 | 717  | CarSat1 | red    | na |
| chrUn | 74742621 | 74746287 | 3667 | CarSat1 | red    | na |
| chrUn | 74746311 | 74747024 | 714  | CarSat1 | red    | na |
| chrUn | 74747040 | 74748671 | 1632 | CarSat1 | red    | na |
| chrUn | 74749671 | 74750337 | 667  | CarSat1 | red    | na |
| chrUn | 74750353 | 74751559 | 1207 | CarSat1 | red    | na |
| chrUn | 74751586 | 74753034 | 1449 | CarSat1 | red    | na |
| chrUn | 74753061 | 74757158 | 4098 | CarSat1 | red    | na |
| chrUn | 74757340 | 74758757 | 1418 | CarSat1 | red    | na |
| chrUn | 74759757 | 74761086 | 1330 | CarSat1 | red    | na |
| chrUn | 74761102 | 74762308 | 1207 | CarSat1 | red    | na |
| chrUn | 74762335 | 74763509 | 1175 | CarSat1 | red    | na |
| chrUn | 74763524 | 74763650 | 127  | Carsat2 | orange | na |
| chrUn | 74763539 | 74764518 | 980  | CarSat1 | red    | na |
| chrUn | 74764545 | 74766730 | 2186 | CarSat1 | red    | na |
| chrUn | 74766757 | 74767468 | 712  | CarSat1 | red    | na |
| chrUn | 74767495 | 74768828 | 1334 | CarSat1 | red    | na |
| chrUn | 74769839 | 74773169 | 3331 | CarSat1 | red    | na |
| chrUn | 74773184 | 74773310 | 127  | Carsat2 | orange | na |
| chrUn | 74773199 | 74773906 | 708  | CarSat1 | red    | na |
| chrUn | 74773936 | 74774422 | 487  | CarSat1 | red    | na |
| chrUn | 74774456 | 74776633 | 2178 | CarSat1 | red    | na |
| chrUn | 74776657 | 74777591 | 935  | CarSat1 | red    | na |
| chrUn | 74777621 | 74778409 | 789  | CarSat1 | red    | na |

|       |          |          |      |         |      |    |
|-------|----------|----------|------|---------|------|----|
| chrUn | 74779898 | 74780065 | 168  | SAT1_CF | blue | na |
| chrUn | 74780076 | 74780616 | 541  | SAT1_CF | blue | na |
| chrUn | 74780711 | 74780976 | 266  | SAT1_CF | blue | na |
| chrUn | 74781027 | 74782969 | 1943 | SAT1_CF | blue | na |
| chrUn | 74783014 | 74784641 | 1628 | SAT1_CF | blue | na |
| chrUn | 74784654 | 74785593 | 940  | SAT1_CF | blue | na |
| chrUn | 74785605 | 74785711 | 107  | SAT1_CF | blue | na |
| chrUn | 74785734 | 74786362 | 629  | SAT1_CF | blue | na |
| chrUn | 74786398 | 74787244 | 847  | SAT1_CF | blue | na |
| chrUn | 74787262 | 74787948 | 687  | SAT1_CF | blue | na |
| chrUn | 74787960 | 74788808 | 849  | SAT1_CF | blue | na |
| chrUn | 74806328 | 74807506 | 1179 | CarSat1 | red  | na |
| chrUn | 74807533 | 74808709 | 1177 | CarSat1 | red  | na |
| chrUn | 74808739 | 74810705 | 1967 | CarSat1 | red  | na |
| chrUn | 74810721 | 74811443 | 723  | CarSat1 | red  | na |
| chrUn | 74811459 | 74813131 | 1673 | CarSat1 | red  | na |
| chrUn | 74813161 | 74814389 | 1229 | CarSat1 | red  | na |
| chrUn | 74814405 | 74815376 | 972  | CarSat1 | red  | na |
| chrUn | 74816378 | 74817970 | 1593 | CarSat1 | red  | na |
| chrUn | 74817985 | 74818920 | 936  | CarSat1 | red  | na |
| chrUn | 74818944 | 74819670 | 727  | CarSat1 | red  | na |
| chrUn | 74819682 | 74823595 | 3914 | CarSat1 | red  | na |
| chrUn | 74823616 | 74825414 | 1799 | CarSat1 | red  | na |
| chrUn | 74826421 | 74827106 | 686  | CarSat1 | red  | na |
| chrUn | 74827122 | 74830050 | 2929 | CarSat1 | red  | na |
| chrUn | 74830066 | 74830786 | 721  | CarSat1 | red  | na |
| chrUn | 74830802 | 74831524 | 723  | CarSat1 | red  | na |
| chrUn | 74831540 | 74835018 | 3479 | CarSat1 | red  | na |
| chrUn | 74835041 | 74835348 | 308  | CarSat1 | red  | na |
| chrUn | 74835362 | 74835462 | 101  | CarSat1 | red  | na |
| chrUn | 74836462 | 74838751 | 2290 | CarSat1 | red  | na |
| chrUn | 74838778 | 74839488 | 711  | CarSat1 | red  | na |
| chrUn | 74839515 | 74840226 | 712  | CarSat1 | red  | na |
| chrUn | 74840253 | 74841222 | 970  | CarSat1 | red  | na |
| chrUn | 74841248 | 74841969 | 722  | CarSat1 | red  | na |
| chrUn | 74841985 | 74842695 | 711  | CarSat1 | red  | na |
| chrUn | 74842720 | 74844393 | 1674 | CarSat1 | red  | na |
| chrUn | 74844423 | 74845503 | 1081 | CarSat1 | red  | na |
| chrUn | 74846507 | 74847913 | 1407 | CarSat1 | red  | na |
| chrUn | 74848100 | 74849194 | 1095 | CarSat1 | red  | na |
| chrUn | 74849221 | 74849931 | 711  | CarSat1 | red  | na |
| chrUn | 74849958 | 74851155 | 1198 | CarSat1 | red  | na |

|       |          |          |      |         |        |    |
|-------|----------|----------|------|---------|--------|----|
| chrUn | 74851180 | 74853357 | 2178 | CarSat1 | red    | na |
| chrUn | 74853391 | 74854840 | 1450 | CarSat1 | red    | na |
| chrUn | 74854865 | 74855539 | 675  | CarSat1 | red    | na |
| chrUn | 74856550 | 74858153 | 1604 | CarSat1 | red    | na |
| chrUn | 74858183 | 74859629 | 1447 | CarSat1 | red    | na |
| chrUn | 74859644 | 74859771 | 128  | Carsat2 | orange | na |
| chrUn | 74859659 | 74861100 | 1442 | CarSat1 | red    | na |
| chrUn | 74861115 | 74861239 | 125  | Carsat2 | orange | na |
| chrUn | 74861130 | 74861835 | 706  | CarSat1 | red    | na |
| chrUn | 74861850 | 74861977 | 128  | Carsat2 | orange | na |
| chrUn | 74861865 | 74862351 | 487  | CarSat1 | red    | na |
| chrUn | 74862384 | 74863594 | 1211 | CarSat1 | red    | na |
| chrUn | 74863615 | 74864059 | 445  | CarSat1 | red    | na |
| chrUn | 74864074 | 74864200 | 127  | Carsat2 | orange | na |
| chrUn | 74864089 | 74864573 | 485  | CarSat1 | red    | na |
| chrUn | 74864606 | 74865565 | 960  | CarSat1 | red    | na |
| chrUn | 74883811 | 74884056 | 246  | SAT1_CF | blue   | na |
| chrUn | 74897555 | 74897811 | 257  | Sat15CF | na     | na |
| chrUn | 74897944 | 74898272 | 329  | Sat15CF | na     | na |
| chrUn | 74900905 | 74901612 | 708  | CarSat1 | red    | na |
| chrUn | 74901634 | 74903602 | 1969 | CarSat1 | red    | na |
| chrUn | 74903604 | 74905471 | 1868 | SAT1_CF | blue   | na |
| chrUn | 74905499 | 74907025 | 1527 | SAT1_CF | blue   | na |
| chrUn | 74907065 | 74907567 | 503  | SAT1_CF | blue   | na |
| chrUn | 74907580 | 74908195 | 616  | SAT1_CF | blue   | na |
| chrUn | 74908190 | 74908495 | 306  | CarSat1 | red    | na |
| chrUn | 74908562 | 74908858 | 297  | CarSat1 | red    | na |
| chrUn | 74910184 | 74910953 | 770  | CarSat1 | red    | na |
| chrUn | 74910983 | 74911690 | 708  | CarSat1 | red    | na |
| chrUn | 74911720 | 74912951 | 1232 | CarSat1 | red    | na |
| chrUn | 74912967 | 74914909 | 1943 | CarSat1 | red    | na |
| chrUn | 74914936 | 74915376 | 441  | CarSat1 | red    | na |
| chrUn | 74915406 | 74916384 | 979  | CarSat1 | red    | na |
| chrUn | 74916411 | 74917120 | 710  | CarSat1 | red    | na |
| chrUn | 74917141 | 74918594 | 1454 | CarSat1 | red    | na |
| chrUn | 74918621 | 74919190 | 570  | CarSat1 | red    | na |
| chrUn | 74920196 | 74923198 | 3003 | CarSat1 | red    | na |
| chrUn | 74923213 | 74924659 | 1447 | CarSat1 | red    | na |
| chrUn | 74924689 | 74925129 | 441  | CarSat1 | red    | na |
| chrUn | 74925156 | 74926134 | 979  | CarSat1 | red    | na |
| chrUn | 74926164 | 74926604 | 441  | CarSat1 | red    | na |
| chrUn | 74926635 | 74927609 | 975  | CarSat1 | red    | na |

|       |          |          |      |         |      |    |
|-------|----------|----------|------|---------|------|----|
| chrUn | 74927639 | 74928079 | 441  | CarSat1 | red  | na |
| chrUn | 74928106 | 74929167 | 1062 | CarSat1 | red  | na |
| chrUn | 74930411 | 74930837 | 427  | CarSat1 | red  | na |
| chrUn | 74930871 | 74931594 | 724  | CarSat1 | red  | na |
| chrUn | 74931580 | 74932922 | 1343 | SAT1_CF | blue | na |
| chrUn | 74932937 | 74933459 | 523  | SAT1_CF | blue | na |
| chrUn | 74933489 | 74935489 | 2001 | SAT1_CF | blue | na |
| chrUn | 74935507 | 74937021 | 1515 | SAT1_CF | blue | na |
| chrUn | 74937036 | 74937737 | 702  | SAT1_CF | blue | na |
| chrUn | 74937765 | 74938641 | 877  | SAT1_CF | blue | na |
| chrUn | 74940204 | 74941694 | 1491 | SAT1_CF | blue | na |
| chrUn | 74941963 | 74942118 | 156  | SAT1_CF | blue | na |
| chrUn | 74942144 | 74942663 | 520  | SAT1_CF | blue | na |
| chrUn | 74942676 | 74942781 | 106  | SAT1_CF | blue | na |
| chrUn | 74942804 | 74944421 | 1618 | SAT1_CF | blue | na |
| chrUn | 74944434 | 74944539 | 106  | SAT1_CF | blue | na |
| chrUn | 74944562 | 74945193 | 632  | SAT1_CF | blue | na |
| chrUn | 74945205 | 74945888 | 684  | SAT1_CF | blue | na |
| chrUn | 74945900 | 74946914 | 1015 | SAT1_CF | blue | na |
| chrUn | 74946935 | 74947487 | 553  | SAT1_CF | blue | na |
| chrUn | 74947499 | 74948744 | 1246 | SAT1_CF | blue | na |
| chrUn | 74948789 | 74949196 | 408  | SAT1_CF | blue | na |
| chrUn | 74950208 | 74952623 | 2416 | CarSat1 | red  | na |
| chrUn | 74952653 | 74953371 | 719  | CarSat1 | red  | na |
| chrUn | 74953386 | 74954842 | 1457 | CarSat1 | red  | na |
| chrUn | 74954857 | 74957775 | 2919 | CarSat1 | red  | na |
| chrUn | 74957805 | 74959184 | 1380 | CarSat1 | red  | na |
| chrUn | 74960203 | 74961100 | 898  | CarSat1 | red  | na |
| chrUn | 74961125 | 74962094 | 970  | CarSat1 | red  | na |
| chrUn | 74962111 | 74963304 | 1194 | CarSat1 | red  | na |
| chrUn | 74963329 | 74964288 | 960  | CarSat1 | red  | na |
| chrUn | 74964335 | 74965495 | 1161 | CarSat1 | red  | na |
| chrUn | 74965520 | 74966484 | 965  | CarSat1 | red  | na |
| chrUn | 74966505 | 74967220 | 716  | CarSat1 | red  | na |
| chrUn | 74967241 | 74967884 | 644  | CarSat1 | red  | na |
| chrUn | 74967967 | 74968650 | 684  | CarSat1 | red  | na |
| chrUn | 74968697 | 74969188 | 492  | CarSat1 | red  | na |
| chrUn | 74980185 | 74982238 | 2054 | CarSat1 | red  | na |
| chrUn | 74982265 | 74982724 | 460  | CarSat1 | red  | na |
| chrUn | 74982749 | 74983470 | 722  | CarSat1 | red  | na |
| chrUn | 74983486 | 74985182 | 1697 | CarSat1 | red  | na |
| chrUn | 74985209 | 74989054 | 3846 | CarSat1 | red  | na |

|       |          |          |      |         |        |    |
|-------|----------|----------|------|---------|--------|----|
| chrUn | 74990155 | 74990645 | 491  | CarSat1 | red    | na |
| chrUn | 74990670 | 74992120 | 1451 | CarSat1 | red    | na |
| chrUn | 74992145 | 74993593 | 1449 | CarSat1 | red    | na |
| chrUn | 74993618 | 74994337 | 720  | CarSat1 | red    | na |
| chrUn | 74994353 | 74995798 | 1446 | CarSat1 | red    | na |
| chrUn | 74995823 | 74996535 | 713  | CarSat1 | red    | na |
| chrUn | 74996560 | 74997788 | 1229 | CarSat1 | red    | na |
| chrUn | 74997819 | 74998259 | 441  | CarSat1 | red    | na |
| chrUn | 74998285 | 74999126 | 842  | CarSat1 | red    | na |
| chrUn | 75000130 | 75000833 | 704  | CarSat1 | red    | na |
| chrUn | 75000860 | 75001821 | 962  | CarSat1 | red    | na |
| chrUn | 75001837 | 75004246 | 2410 | CarSat1 | red    | na |
| chrUn | 75004276 | 75004984 | 709  | CarSat1 | red    | na |
| chrUn | 75005014 | 75006246 | 1233 | CarSat1 | red    | na |
| chrUn | 75006271 | 75007197 | 927  | CarSat1 | red    | na |
| chrUn | 75007227 | 75007935 | 709  | CarSat1 | red    | na |
| chrUn | 75007965 | 75009094 | 1130 | CarSat1 | red    | na |
| chrUn | 75012034 | 75013192 | 1159 | Sat2CF  | purple | na |
| chrUn | 75020062 | 75020699 | 638  | CarSat1 | red    | na |
| chrUn | 75020726 | 75021933 | 1208 | CarSat1 | red    | na |
| chrUn | 75021949 | 75022670 | 722  | CarSat1 | red    | na |
| chrUn | 75022686 | 75027331 | 4646 | CarSat1 | red    | na |
| chrUn | 75027358 | 75028069 | 712  | CarSat1 | red    | na |
| chrUn | 75028096 | 75029004 | 909  | CarSat1 | red    | na |
| chrUn | 75030044 | 75031303 | 1260 | CarSat1 | red    | na |
| chrUn | 75031319 | 75032281 | 963  | CarSat1 | red    | na |
| chrUn | 75032308 | 75034987 | 2680 | CarSat1 | red    | na |
| chrUn | 75035003 | 75035723 | 721  | CarSat1 | red    | na |
| chrUn | 75035739 | 75036701 | 963  | CarSat1 | red    | na |
| chrUn | 75036728 | 75037437 | 710  | CarSat1 | red    | na |
| chrUn | 75037464 | 75038991 | 1528 | CarSat1 | red    | na |
| chrUn | 75039991 | 75040359 | 369  | SAT1_CF | blue   | na |
| chrUn | 75040399 | 75042959 | 2561 | SAT1_CF | blue   | na |
| chrUn | 75043003 | 75043984 | 982  | SAT1_CF | blue   | na |
| chrUn | 75043997 | 75044598 | 602  | SAT1_CF | blue   | na |
| chrUn | 75044612 | 75045298 | 687  | SAT1_CF | blue   | na |
| chrUn | 75045342 | 75046640 | 1299 | SAT1_CF | blue   | na |
| chrUn | 75046681 | 75048454 | 1774 | SAT1_CF | blue   | na |
| chrUn | 75048466 | 75048953 | 488  | SAT1_CF | blue   | na |
| chrUn | 75049953 | 75050569 | 617  | CarSat1 | red    | na |
| chrUn | 75050590 | 75052778 | 2189 | CarSat1 | red    | na |
| chrUn | 75052799 | 75054010 | 1212 | CarSat1 | red    | na |



|       |          |          |      |         |        |    |
|-------|----------|----------|------|---------|--------|----|
| chrUn | 75054035 | 75054747 | 713  | CarSat1 | red    | na |
| chrUn | 75054772 | 75055484 | 713  | CarSat1 | red    | na |
| chrUn | 75055500 | 75056213 | 714  | CarSat1 | red    | na |
| chrUn | 75056238 | 75056959 | 722  | CarSat1 | red    | na |
| chrUn | 75056984 | 75057942 | 959  | CarSat1 | red    | na |
| chrUn | 75057963 | 75058908 | 946  | CarSat1 | red    | na |
| chrUn | 75081366 | 75082067 | 702  | CarSat1 | red    | na |
| chrUn | 75082114 | 75082832 | 719  | CarSat1 | red    | na |
| chrUn | 75082847 | 75082974 | 128  | Carsat2 | orange | na |
| chrUn | 75082862 | 75083837 | 976  | CarSat1 | red    | na |
| chrUn | 75083864 | 75084826 | 963  | CarSat1 | red    | na |
| chrUn | 75084842 | 75085778 | 937  | CarSat1 | red    | na |
| chrUn | 75085808 | 75087525 | 1718 | CarSat1 | red    | na |
| chrUn | 75087552 | 75088263 | 712  | CarSat1 | red    | na |
| chrUn | 75088290 | 75089250 | 961  | CarSat1 | red    | na |
| chrUn | 75089266 | 75090284 | 1019 | CarSat1 | red    | na |
| chrUn | 75091290 | 75092434 | 1145 | CarSat1 | red    | na |
| chrUn | 75092450 | 75093170 | 721  | CarSat1 | red    | na |
| chrUn | 75093186 | 75094643 | 1458 | CarSat1 | red    | na |
| chrUn | 75094659 | 75096104 | 1446 | CarSat1 | red    | na |
| chrUn | 75096129 | 75098070 | 1942 | CarSat1 | red    | na |
| chrUn | 75098097 | 75098806 | 710  | CarSat1 | red    | na |
| chrUn | 75098833 | 75100209 | 1377 | CarSat1 | red    | na |
| chrUn | 75101261 | 75102109 | 849  | CarSat1 | red    | na |
| chrUn | 75102125 | 75104320 | 2196 | CarSat1 | red    | na |
| chrUn | 75104336 | 75105297 | 962  | CarSat1 | red    | na |
| chrUn | 75105324 | 75106777 | 1454 | CarSat1 | red    | na |
| chrUn | 75106798 | 75108001 | 1204 | CarSat1 | red    | na |
| chrUn | 75108017 | 75110162 | 2146 | CarSat1 | red    | na |
| chrUn | 75124165 | 75126062 | 1898 | CarSat1 | red    | na |
| chrUn | 75126087 | 75127045 | 959  | CarSat1 | red    | na |
| chrUn | 75127066 | 75127527 | 462  | CarSat1 | red    | na |
| chrUn | 75127552 | 75129995 | 2444 | CarSat1 | red    | na |
| chrUn | 75130016 | 75130731 | 716  | CarSat1 | red    | na |
| chrUn | 75130752 | 75131468 | 717  | CarSat1 | red    | na |
| chrUn | 75131489 | 75133053 | 1565 | CarSat1 | red    | na |
| chrUn | 75163892 | 75165913 | 2022 | CarSat1 | red    | na |
| chrUn | 75165966 | 75166866 | 901  | CarSat1 | red    | na |
| chrUn | 75166881 | 75167007 | 127  | Carsat2 | orange | na |
| chrUn | 75166896 | 75168605 | 1710 | CarSat1 | red    | na |
| chrUn | 75168644 | 75172304 | 3661 | CarSat1 | red    | na |
| chrUn | 75172331 | 75172807 | 477  | CarSat1 | red    | na |

|       |          |          |      |         |        |    |
|-------|----------|----------|------|---------|--------|----|
| chrUn | 75173844 | 75176515 | 2672 | CarSat1 | red    | na |
| chrUn | 75176563 | 75177505 | 943  | CarSat1 | red    | na |
| chrUn | 75177530 | 75178728 | 1199 | CarSat1 | red    | na |
| chrUn | 75178755 | 75180456 | 1702 | CarSat1 | red    | na |
| chrUn | 75180481 | 75181676 | 1196 | CarSat1 | red    | na |
| chrUn | 75181703 | 75182719 | 1017 | CarSat1 | red    | na |
| chrUn | 75183721 | 75184429 | 709  | CarSat1 | red    | na |
| chrUn | 75184454 | 75186141 | 1688 | CarSat1 | red    | na |
| chrUn | 75186168 | 75187374 | 1207 | CarSat1 | red    | na |
| chrUn | 75187399 | 75188847 | 1449 | CarSat1 | red    | na |
| chrUn | 75188872 | 75190093 | 1222 | CarSat1 | red    | na |
| chrUn | 75190123 | 75190830 | 708  | CarSat1 | red    | na |
| chrUn | 75190860 | 75191567 | 708  | CarSat1 | red    | na |
| chrUn | 75191597 | 75192608 | 1012 | CarSat1 | red    | na |
| chrUn | 75193624 | 75194909 | 1286 | CarSat1 | red    | na |
| chrUn | 75194924 | 75195051 | 128  | Carsat2 | orange | na |
| chrUn | 75194939 | 75195646 | 708  | CarSat1 | red    | na |
| chrUn | 75195661 | 75195787 | 127  | Carsat2 | orange | na |
| chrUn | 75195676 | 75196383 | 708  | CarSat1 | red    | na |
| chrUn | 75196413 | 75196899 | 487  | CarSat1 | red    | na |
| chrUn | 75196932 | 75198594 | 1663 | CarSat1 | red    | na |
| chrUn | 75198609 | 75198734 | 126  | Carsat2 | orange | na |
| chrUn | 75198624 | 75199328 | 705  | CarSat1 | red    | na |
| chrUn | 75199358 | 75200064 | 707  | CarSat1 | red    | na |
| chrUn | 75200079 | 75200206 | 128  | Carsat2 | orange | na |
| chrUn | 75200094 | 75200802 | 709  | CarSat1 | red    | na |
| chrUn | 75200817 | 75200944 | 128  | Carsat2 | orange | na |
| chrUn | 75200832 | 75201539 | 708  | CarSat1 | red    | na |
| chrUn | 75201554 | 75201679 | 126  | Carsat2 | orange | na |
| chrUn | 75201569 | 75202404 | 836  | CarSat1 | red    | na |
| chrUn | 75213400 | 75213952 | 553  | CarSat1 | red    | na |
| chrUn | 75213973 | 75218125 | 4153 | CarSat1 | red    | na |
| chrUn | 75218150 | 75219848 | 1699 | CarSat1 | red    | na |
| chrUn | 75219869 | 75220329 | 461  | CarSat1 | red    | na |
| chrUn | 75220354 | 75221323 | 970  | CarSat1 | red    | na |
| chrUn | 75221344 | 75222288 | 945  | CarSat1 | red    | na |
| chrUn | 75223288 | 75224956 | 1669 | CarSat1 | red    | na |
| chrUn | 75224981 | 75227914 | 2934 | CarSat1 | red    | na |
| chrUn | 75227939 | 75229874 | 1936 | CarSat1 | red    | na |
| chrUn | 75229895 | 75230856 | 962  | CarSat1 | red    | na |
| chrUn | 75230890 | 75231593 | 704  | CarSat1 | red    | na |
| chrUn | 75231618 | 75232158 | 541  | CarSat1 | red    | na |

|       |          |          |      |         |        |    |
|-------|----------|----------|------|---------|--------|----|
| chrUn | 75233177 | 75234130 | 954  | CarSat1 | red    | na |
| chrUn | 75234236 | 75234517 | 282  | CarSat1 | red    | na |
| chrUn | 75234544 | 75235603 | 1060 | CarSat1 | red    | na |
| chrUn | 75235634 | 75236339 | 706  | CarSat1 | red    | na |
| chrUn | 75236365 | 75237810 | 1446 | CarSat1 | red    | na |
| chrUn | 75237837 | 75238547 | 711  | CarSat1 | red    | na |
| chrUn | 75238574 | 75239282 | 709  | CarSat1 | red    | na |
| chrUn | 75239309 | 75240754 | 1446 | CarSat1 | red    | na |
| chrUn | 75240781 | 75242059 | 1279 | CarSat1 | red    | na |
| chrUn | 75243091 | 75245825 | 2735 | CarSat1 | red    | na |
| chrUn | 75245846 | 75251235 | 5390 | CarSat1 | red    | na |
| chrUn | 75251265 | 75251943 | 679  | CarSat1 | red    | na |
| chrUn | 75252953 | 75253838 | 886  | CarSat1 | red    | na |
| chrUn | 75253871 | 75254799 | 929  | CarSat1 | red    | na |
| chrUn | 75254821 | 75254948 | 128  | Carsat2 | orange | na |
| chrUn | 75254836 | 75257038 | 2203 | CarSat1 | red    | na |
| chrUn | 75257068 | 75258513 | 1446 | CarSat1 | red    | na |
| chrUn | 75258543 | 75261556 | 3014 | CarSat1 | red    | na |
| chrUn | 75275221 | 75275316 | 96   | Carsat2 | orange | na |
| chrUn | 75275235 | 75276130 | 896  | CarSat1 | red    | na |
| chrUn | 75276146 | 75276866 | 721  | CarSat1 | red    | na |
| chrUn | 75276882 | 75278340 | 1459 | CarSat1 | red    | na |
| chrUn | 75278356 | 75279558 | 1203 | CarSat1 | red    | na |
| chrUn | 75279585 | 75280296 | 712  | CarSat1 | red    | na |
| chrUn | 75280323 | 75281285 | 963  | CarSat1 | red    | na |
| chrUn | 75281301 | 75282507 | 1207 | CarSat1 | red    | na |
| chrUn | 75282534 | 75283495 | 962  | CarSat1 | red    | na |
| chrUn | 75283511 | 75283957 | 447  | CarSat1 | red    | na |
| chrUn | 75285056 | 75286617 | 1562 | CarSat1 | red    | na |
| chrUn | 75286633 | 75287595 | 963  | CarSat1 | red    | na |
| chrUn | 75287622 | 75288465 | 844  | CarSat1 | red    | na |
| chrUn | 75288915 | 75289498 | 584  | CarSat1 | red    | na |
| chrUn | 75289514 | 75291711 | 2198 | CarSat1 | red    | na |
| chrUn | 75291727 | 75292688 | 962  | CarSat1 | red    | na |
| chrUn | 75292715 | 75293426 | 712  | CarSat1 | red    | na |
| chrUn | 75293453 | 75294300 | 848  | CarSat1 | red    | na |
| chrUn | 75295326 | 75296177 | 852  | CarSat1 | red    | na |
| chrUn | 75296193 | 75296913 | 721  | CarSat1 | red    | na |
| chrUn | 75296929 | 75298138 | 1210 | CarSat1 | red    | na |
| chrUn | 75298165 | 75298875 | 711  | CarSat1 | red    | na |
| chrUn | 75298902 | 75300590 | 1689 | CarSat1 | red    | na |
| chrUn | 75300617 | 75301827 | 1211 | CarSat1 | red    | na |

|       |          |          |      |         |        |    |
|-------|----------|----------|------|---------|--------|----|
| chrUn | 75301852 | 75304147 | 2296 | CarSat1 | red    | na |
| chrUn | 75305170 | 75306020 | 851  | CarSat1 | red    | na |
| chrUn | 75306036 | 75307000 | 965  | CarSat1 | red    | na |
| chrUn | 75307027 | 75309709 | 2683 | CarSat1 | red    | na |
| chrUn | 75309725 | 75311922 | 2198 | CarSat1 | red    | na |
| chrUn | 75311938 | 75313964 | 2027 | CarSat1 | red    | na |
| chrUn | 75322027 | 75322869 | 843  | Sat2CF  | purple | na |
| chrUn | 75322092 | 75322809 | 718  | Sat2CF  | purple | na |
| chrUn | 75324776 | 75325605 | 830  | CarSat1 | red    | na |
| chrUn | 75325632 | 75326091 | 460  | CarSat1 | red    | na |
| chrUn | 75326116 | 75327076 | 961  | CarSat1 | red    | na |
| chrUn | 75327103 | 75327813 | 711  | CarSat1 | red    | na |
| chrUn | 75327840 | 75332734 | 4895 | CarSat1 | red    | na |
| chrUn | 75332750 | 75333583 | 834  | CarSat1 | red    | na |
| chrUn | 75334633 | 75335509 | 877  | CarSat1 | red    | na |
| chrUn | 75335536 | 75336245 | 710  | CarSat1 | red    | na |
| chrUn | 75336272 | 75337717 | 1446 | CarSat1 | red    | na |
| chrUn | 75337744 | 75339688 | 1945 | CarSat1 | red    | na |
| chrUn | 75339704 | 75342137 | 2434 | CarSat1 | red    | na |
| chrUn | 75342164 | 75343312 | 1149 | CarSat1 | red    | na |
| chrUn | 75344427 | 75347864 | 3438 | CarSat1 | red    | na |
| chrUn | 75347888 | 75348357 | 470  | CarSat1 | red    | na |
| chrUn | 75348384 | 75349337 | 954  | CarSat1 | red    | na |
| chrUn | 75349361 | 75350295 | 935  | CarSat1 | red    | na |
| chrUn | 75350310 | 75350436 | 127  | Carsat2 | orange | na |
| chrUn | 75350325 | 75351745 | 1421 | CarSat1 | red    | na |
| chrUn | 75351789 | 75353082 | 1294 | CarSat1 | red    | na |
| chrUn | 75354227 | 75354936 | 710  | CarSat1 | red    | na |
| chrUn | 75354969 | 75356923 | 1955 | CarSat1 | red    | na |
| chrUn | 75356953 | 75358393 | 1441 | CarSat1 | red    | na |
| chrUn | 75358423 | 75359131 | 709  | CarSat1 | red    | na |
| chrUn | 75359161 | 75359869 | 709  | CarSat1 | red    | na |
| chrUn | 75359899 | 75360607 | 709  | CarSat1 | red    | na |
| chrUn | 75360637 | 75361343 | 707  | CarSat1 | red    | na |
| chrUn | 75361374 | 75362082 | 709  | CarSat1 | red    | na |
| chrUn | 75362112 | 75362999 | 888  | CarSat1 | red    | na |
| chrUn | 75364006 | 75366167 | 2162 | CarSat1 | red    | na |
| chrUn | 75366182 | 75367641 | 1460 | CarSat1 | red    | na |
| chrUn | 75367656 | 75368364 | 709  | CarSat1 | red    | na |
| chrUn | 75368394 | 75369837 | 1444 | CarSat1 | red    | na |
| chrUn | 75369867 | 75371543 | 1677 | CarSat1 | red    | na |
| chrUn | 75371567 | 75372790 | 1224 | CarSat1 | red    | na |

|       |          |          |      |         |        |    |
|-------|----------|----------|------|---------|--------|----|
| chrUn | 75373804 | 75374573 | 770  | CarSat1 | red    | na |
| chrUn | 75374589 | 75375309 | 721  | CarSat1 | red    | na |
| chrUn | 75375325 | 75378007 | 2683 | CarSat1 | red    | na |
| chrUn | 75378034 | 75378742 | 709  | CarSat1 | red    | na |
| chrUn | 75378769 | 75379480 | 712  | CarSat1 | red    | na |
| chrUn | 75379507 | 75381691 | 2185 | CarSat1 | red    | na |
| chrUn | 75381718 | 75382590 | 873  | CarSat1 | red    | na |
| chrUn | 75383590 | 75384012 | 423  | CarSat1 | red    | na |
| chrUn | 75384028 | 75384154 | 127  | Carsat2 | orange | na |
| chrUn | 75384042 | 75386751 | 2710 | CarSat1 | red    | na |
| chrUn | 75386767 | 75387489 | 723  | CarSat1 | red    | na |
| chrUn | 75387505 | 75388226 | 722  | CarSat1 | red    | na |
| chrUn | 75388242 | 75388964 | 723  | CarSat1 | red    | na |
| chrUn | 75388980 | 75389451 | 472  | CarSat1 | red    | na |
| chrUn | 75389476 | 75390186 | 711  | CarSat1 | red    | na |
| chrUn | 75390213 | 75391174 | 962  | CarSat1 | red    | na |
| chrUn | 75391187 | 75391902 | 716  | CarSat1 | red    | na |
| chrUn | 75391927 | 75392381 | 455  | CarSat1 | red    | na |
| chrUn | 75393384 | 75395122 | 1739 | CarSat1 | red    | na |
| chrUn | 75395149 | 75395859 | 711  | CarSat1 | red    | na |
| chrUn | 75395886 | 75397096 | 1211 | CarSat1 | red    | na |
| chrUn | 75397109 | 75398805 | 1697 | CarSat1 | red    | na |
| chrUn | 75398832 | 75402165 | 3334 | CarSat1 | red    | na |
| chrUn | 75403176 | 75404450 | 1275 | CarSat1 | red    | na |
| chrUn | 75404474 | 75404960 | 487  | CarSat1 | red    | na |
| chrUn | 75404990 | 75405925 | 936  | CarSat1 | red    | na |
| chrUn | 75405949 | 75406663 | 715  | CarSat1 | red    | na |
| chrUn | 75406687 | 75407392 | 706  | CarSat1 | red    | na |
| chrUn | 75407425 | 75408138 | 714  | CarSat1 | red    | na |
| chrUn | 75408162 | 75408646 | 485  | CarSat1 | red    | na |
| chrUn | 75408676 | 75410590 | 1915 | CarSat1 | red    | na |
| chrUn | 75410617 | 75411959 | 1343 | CarSat1 | red    | na |
| chrUn | 75412959 | 75413798 | 840  | CarSat1 | red    | na |
| chrUn | 75413825 | 75415737 | 1913 | CarSat1 | red    | na |
| chrUn | 75415767 | 75417547 | 1781 | CarSat1 | red    | na |
| chrUn | 75417568 | 75419156 | 1589 | CarSat1 | red    | na |
| chrUn | 75419177 | 75420753 | 1577 | CarSat1 | red    | na |
| chrUn | 75420774 | 75421728 | 955  | CarSat1 | red    | na |
| chrUn | 75422740 | 75425077 | 2338 | CarSat1 | red    | na |
| chrUn | 75425104 | 75426549 | 1446 | CarSat1 | red    | na |
| chrUn | 75426576 | 75427044 | 469  | CarSat1 | red    | na |
| chrUn | 75427060 | 75428021 | 962  | CarSat1 | red    | na |

|       |          |          |      |         |     |    |
|-------|----------|----------|------|---------|-----|----|
| chrUn | 75428046 | 75429992 | 1947 | CarSat1 | red | na |
| chrUn | 75430008 | 75430720 | 713  | CarSat1 | red | na |
| chrUn | 75430745 | 75431514 | 770  | CarSat1 | red | na |
| chrUn | 75432523 | 75433649 | 1127 | CarSat1 | red | na |
| chrUn | 75433665 | 75437078 | 3414 | CarSat1 | red | na |
| chrUn | 75437105 | 75438059 | 955  | CarSat1 | red | na |
| chrUn | 75438071 | 75439289 | 1219 | CarSat1 | red | na |
| chrUn | 75439316 | 75440027 | 712  | CarSat1 | red | na |
| chrUn | 75440048 | 75441281 | 1234 | CarSat1 | red | na |
| chrUn | 75442302 | 75442807 | 506  | CarSat1 | red | na |
| chrUn | 75442839 | 75443799 | 961  | CarSat1 | red | na |
| chrUn | 75443815 | 75444284 | 470  | CarSat1 | red | na |
| chrUn | 75444309 | 75445270 | 962  | CarSat1 | red | na |
| chrUn | 75445294 | 75445754 | 461  | CarSat1 | red | na |
| chrUn | 75445781 | 75447966 | 2186 | CarSat1 | red | na |
| chrUn | 75447987 | 75448945 | 959  | CarSat1 | red | na |
| chrUn | 75448978 | 75449683 | 706  | CarSat1 | red | na |
| chrUn | 75449699 | 75450167 | 469  | CarSat1 | red | na |
| chrUn | 75450194 | 75451063 | 870  | CarSat1 | red | na |
| chrUn | 75452074 | 75452513 | 440  | CarSat1 | red | na |
| chrUn | 75452540 | 75455463 | 2924 | CarSat1 | red | na |
| chrUn | 75455490 | 75455955 | 466  | CarSat1 | red | na |
| chrUn | 75455971 | 75456931 | 961  | CarSat1 | red | na |
| chrUn | 75456958 | 75458403 | 1446 | CarSat1 | red | na |
| chrUn | 75458430 | 75458898 | 469  | CarSat1 | red | na |
| chrUn | 75458914 | 75459876 | 963  | CarSat1 | red | na |
| chrUn | 75459903 | 75460833 | 931  | CarSat1 | red | na |
| chrUn | 75461836 | 75463066 | 1231 | CarSat1 | red | na |
| chrUn | 75463082 | 75463551 | 470  | CarSat1 | red | na |
| chrUn | 75463578 | 75464539 | 962  | CarSat1 | red | na |
| chrUn | 75464555 | 75465276 | 722  | CarSat1 | red | na |
| chrUn | 75465301 | 75466501 | 1201 | CarSat1 | red | na |
| chrUn | 75466528 | 75468963 | 2436 | CarSat1 | red | na |
| chrUn | 75468979 | 75469701 | 723  | CarSat1 | red | na |
| chrUn | 75469717 | 75470596 | 880  | CarSat1 | red | na |
| chrUn | 75471596 | 75472212 | 617  | CarSat1 | red | na |
| chrUn | 75472237 | 75473696 | 1460 | CarSat1 | red | na |
| chrUn | 75473712 | 75475907 | 2196 | CarSat1 | red | na |
| chrUn | 75475923 | 75478110 | 2188 | CarSat1 | red | na |
| chrUn | 75478135 | 75479594 | 1460 | CarSat1 | red | na |
| chrUn | 75479610 | 75480320 | 711  | CarSat1 | red | na |
| chrUn | 75481388 | 75487994 | 6607 | CarSat1 | red | na |

|       |          |          |      |         |        |    |
|-------|----------|----------|------|---------|--------|----|
| chrUn | 75488024 | 75489465 | 1442 | CarSat1 | red    | na |
| chrUn | 75489495 | 75490109 | 615  | CarSat1 | red    | na |
| chrUn | 75491133 | 75493591 | 2459 | CarSat1 | red    | na |
| chrUn | 75493621 | 75494061 | 441  | CarSat1 | red    | na |
| chrUn | 75494088 | 75495066 | 979  | CarSat1 | red    | na |
| chrUn | 75495096 | 75496032 | 937  | CarSat1 | red    | na |
| chrUn | 75496048 | 75497276 | 1229 | CarSat1 | red    | na |
| chrUn | 75497306 | 75497745 | 440  | CarSat1 | red    | na |
| chrUn | 75497772 | 75498482 | 711  | CarSat1 | red    | na |
| chrUn | 75498509 | 75499843 | 1335 | CarSat1 | red    | na |
| chrUn | 75500859 | 75501084 | 226  | SAT1_CF | blue   | na |
| chrUn | 75501098 | 75501205 | 108  | SAT1_CF | blue   | na |
| chrUn | 75501227 | 75501779 | 553  | SAT1_CF | blue   | na |
| chrUn | 75501791 | 75504543 | 2753 | SAT1_CF | blue   | na |
| chrUn | 75504570 | 75505091 | 522  | SAT1_CF | blue   | na |
| chrUn | 75505103 | 75505905 | 803  | SAT1_CF | blue   | na |
| chrUn | 75505927 | 75506948 | 1022 | SAT1_CF | blue   | na |
| chrUn | 75506993 | 75508277 | 1285 | SAT1_CF | blue   | na |
| chrUn | 75508302 | 75508815 | 514  | SAT1_CF | blue   | na |
| chrUn | 75508835 | 75509603 | 769  | SAT1_CF | blue   | na |
| chrUn | 75510611 | 75511695 | 1085 | CarSat1 | red    | na |
| chrUn | 75511710 | 75513152 | 1443 | CarSat1 | red    | na |
| chrUn | 75513182 | 75515105 | 1924 | CarSat1 | red    | na |
| chrUn | 75515125 | 75516854 | 1730 | CarSat1 | red    | na |
| chrUn | 75516869 | 75517576 | 708  | CarSat1 | red    | na |
| chrUn | 75517606 | 75518785 | 1180 | CarSat1 | red    | na |
| chrUn | 75518812 | 75519329 | 518  | CarSat1 | red    | na |
| chrUn | 75527322 | 75527578 | 257  | Sat15CF | na     | na |
| chrUn | 75527715 | 75528043 | 329  | Sat15CF | na     | na |
| chrUn | 75527715 | 75528043 | 329  | Sat15CF | na     | na |
| chrUn | 75530425 | 75531623 | 1199 | CarSat1 | red    | na |
| chrUn | 75531650 | 75532361 | 712  | CarSat1 | red    | na |
| chrUn | 75532388 | 75533837 | 1450 | CarSat1 | red    | na |
| chrUn | 75533864 | 75535807 | 1944 | CarSat1 | red    | na |
| chrUn | 75535823 | 75536784 | 962  | CarSat1 | red    | na |
| chrUn | 75536811 | 75538009 | 1199 | CarSat1 | red    | na |
| chrUn | 75538034 | 75539132 | 1099 | CarSat1 | red    | na |
| chrUn | 75540165 | 75540687 | 523  | CarSat1 | red    | na |
| chrUn | 75540702 | 75540828 | 127  | Carsat2 | orange | na |
| chrUn | 75540717 | 75541421 | 705  | CarSat1 | red    | na |
| chrUn | 75541436 | 75541562 | 127  | Carsat2 | orange | na |
| chrUn | 75541451 | 75544437 | 2987 | CarSat1 | red    | na |

|       |          |          |      |         |        |    |
|-------|----------|----------|------|---------|--------|----|
| chrUn | 75544467 | 75546652 | 2186 | CarSat1 | red    | na |
| chrUn | 75546667 | 75546793 | 127  | Carsat2 | orange | na |
| chrUn | 75546682 | 75547387 | 706  | CarSat1 | red    | na |
| chrUn | 75547418 | 75548135 | 718  | CarSat1 | red    | na |
| chrUn | 75548150 | 75548277 | 128  | Carsat2 | orange | na |
| chrUn | 75548165 | 75548845 | 681  | CarSat1 | red    | na |
| chrUn | 75551609 | 75552490 | 882  | CarSat1 | red    | na |
| chrUn | 75552508 | 75553230 | 723  | CarSat1 | red    | na |
| chrUn | 75553249 | 75554425 | 1177 | CarSat1 | red    | na |
| chrUn | 75554430 | 75556252 | 1823 | SAT1_CF | blue   | na |
| chrUn | 75556295 | 75557266 | 972  | SAT1_CF | blue   | na |
| chrUn | 75557343 | 75557887 | 545  | SAT1_CF | blue   | na |
| chrUn | 75557900 | 75558514 | 615  | SAT1_CF | blue   | na |
| chrUn | 75559571 | 75560713 | 1143 | CarSat1 | red    | na |
| chrUn | 75560738 | 75562670 | 1933 | CarSat1 | red    | na |
| chrUn | 75562707 | 75564610 | 1904 | CarSat1 | red    | na |
| chrUn | 75564624 | 75564750 | 127  | Carsat2 | orange | na |
| chrUn | 75564639 | 75565346 | 708  | CarSat1 | red    | na |
| chrUn | 75565376 | 75566352 | 977  | CarSat1 | red    | na |
| chrUn | 75566379 | 75568282 | 1904 | CarSat1 | red    | na |
| chrUn | 75569312 | 75570191 | 880  | CarSat1 | red    | na |
| chrUn | 75570218 | 75571666 | 1449 | CarSat1 | red    | na |
| chrUn | 75571691 | 75572891 | 1201 | CarSat1 | red    | na |
| chrUn | 75572916 | 75573636 | 721  | CarSat1 | red    | na |
| chrUn | 75573652 | 75574614 | 963  | CarSat1 | red    | na |
| chrUn | 75574645 | 75575351 | 707  | CarSat1 | red    | na |
| chrUn | 75575378 | 75575837 | 460  | CarSat1 | red    | na |
| chrUn | 75575862 | 75576582 | 721  | CarSat1 | red    | na |
| chrUn | 75576607 | 75577971 | 1365 | CarSat1 | red    | na |
| chrUn | 75588685 | 75590424 | 1740 | CarSat1 | red    | na |
| chrUn | 75590488 | 75590926 | 439  | CarSat1 | red    | na |
| chrUn | 75590956 | 75591935 | 980  | CarSat1 | red    | na |
| chrUn | 75591962 | 75593138 | 1177 | CarSat1 | red    | na |
| chrUn | 75593168 | 75595352 | 2185 | CarSat1 | red    | na |
| chrUn | 75595382 | 75597356 | 1975 | CarSat1 | red    | na |
| chrUn | 75598402 | 75600452 | 2051 | CarSat1 | red    | na |
| chrUn | 75600479 | 75601927 | 1449 | CarSat1 | red    | na |
| chrUn | 75601954 | 75603402 | 1449 | CarSat1 | red    | na |
| chrUn | 75603429 | 75604139 | 711  | CarSat1 | red    | na |
| chrUn | 75604166 | 75604876 | 711  | CarSat1 | red    | na |
| chrUn | 75604903 | 75605613 | 711  | CarSat1 | red    | na |
| chrUn | 75605640 | 75606351 | 712  | CarSat1 | red    | na |



|       |          |          |      |         |        |    |
|-------|----------|----------|------|---------|--------|----|
| chrUn | 75606378 | 75607066 | 689  | CarSat1 | red    | na |
| chrUn | 75608102 | 75608669 | 568  | CarSat1 | red    | na |
| chrUn | 75608804 | 75610441 | 1638 | CarSat1 | red    | na |
| chrUn | 75610465 | 75611704 | 1240 | CarSat1 | red    | na |
| chrUn | 75611719 | 75613166 | 1448 | CarSat1 | red    | na |
| chrUn | 75613196 | 75613902 | 707  | CarSat1 | red    | na |
| chrUn | 75613932 | 75614639 | 708  | CarSat1 | red    | na |
| chrUn | 75614669 | 75615380 | 712  | CarSat1 | red    | na |
| chrUn | 75615410 | 75616724 | 1315 | CarSat1 | red    | na |
| chrUn | 75617750 | 75618967 | 1218 | CarSat1 | red    | na |
| chrUn | 75619009 | 75619443 | 435  | CarSat1 | red    | na |
| chrUn | 75619464 | 75620442 | 979  | CarSat1 | red    | na |
| chrUn | 75620477 | 75621170 | 694  | CarSat1 | red    | na |
| chrUn | 75621212 | 75621646 | 435  | CarSat1 | red    | na |
| chrUn | 75621667 | 75622381 | 715  | CarSat1 | red    | na |
| chrUn | 75622402 | 75623845 | 1444 | CarSat1 | red    | na |
| chrUn | 75623866 | 75624835 | 970  | CarSat1 | red    | na |
| chrUn | 75624877 | 75626397 | 1521 | CarSat1 | red    | na |
| chrUn | 75634234 | 75635413 | 1180 | Sat2CF  | purple | na |
| chrUn | 75637110 | 75638772 | 1663 | CarSat1 | red    | na |
| chrUn | 75638802 | 75640240 | 1439 | CarSat1 | red    | na |
| chrUn | 75640270 | 75645736 | 5467 | CarSat1 | red    | na |
| chrUn | 75653312 | 75653503 | 192  | Sat7CF  | lime   | na |
| chrUn | 75653335 | 75653722 | 388  | Sat7CF  | lime   | na |
| chrUn | 75653374 | 75653705 | 332  | Sat7CF  | lime   | na |
| chrUn | 75657707 | 75658492 | 786  | CarSat1 | red    | na |
| chrUn | 75658519 | 75659725 | 1207 | CarSat1 | red    | na |
| chrUn | 75659749 | 75660704 | 956  | CarSat1 | red    | na |
| chrUn | 75660731 | 75661441 | 711  | CarSat1 | red    | na |
| chrUn | 75661468 | 75662178 | 711  | CarSat1 | red    | na |
| chrUn | 75662205 | 75662916 | 712  | CarSat1 | red    | na |
| chrUn | 75662943 | 75663653 | 711  | CarSat1 | red    | na |
| chrUn | 75663680 | 75664389 | 710  | CarSat1 | red    | na |
| chrUn | 75664416 | 75665863 | 1448 | CarSat1 | red    | na |
| chrUn | 75665890 | 75666358 | 469  | CarSat1 | red    | na |
| chrUn | 75677044 | 75678149 | 1106 | CarSat1 | red    | na |
| chrUn | 75678164 | 75678290 | 127  | Carsat2 | orange | na |
| chrUn | 75678179 | 75678890 | 712  | CarSat1 | red    | na |
| chrUn | 75678905 | 75679020 | 116  | Carsat2 | orange | na |
| chrUn | 75678920 | 75680369 | 1450 | CarSat1 | red    | na |
| chrUn | 75680384 | 75680511 | 128  | Carsat2 | orange | na |
| chrUn | 75680399 | 75681111 | 713  | CarSat1 | red    | na |

|       |          |          |      |         |        |    |
|-------|----------|----------|------|---------|--------|----|
| chrUn | 75681126 | 75681253 | 128  | Carsat2 | orange | na |
| chrUn | 75681141 | 75681627 | 487  | CarSat1 | red    | na |
| chrUn | 75681651 | 75682591 | 941  | CarSat1 | red    | na |
| chrUn | 75682621 | 75683329 | 709  | CarSat1 | red    | na |
| chrUn | 75683344 | 75683471 | 128  | Carsat2 | orange | na |
| chrUn | 75683359 | 75684802 | 1444 | CarSat1 | red    | na |
| chrUn | 75684832 | 75685685 | 854  | CarSat1 | red    | na |
| chrUn | 75686730 | 75687831 | 1102 | CarSat1 | red    | na |
| chrUn | 75687858 | 75688568 | 711  | CarSat1 | red    | na |
| chrUn | 75688595 | 75689306 | 712  | CarSat1 | red    | na |
| chrUn | 75689333 | 75690044 | 712  | CarSat1 | red    | na |
| chrUn | 75690071 | 75691021 | 951  | CarSat1 | red    | na |
| chrUn | 75691046 | 75692253 | 1208 | CarSat1 | red    | na |
| chrUn | 75692280 | 75692990 | 711  | CarSat1 | red    | na |
| chrUn | 75693017 | 75693980 | 964  | CarSat1 | red    | na |
| chrUn | 75693996 | 75695364 | 1369 | CarSat1 | red    | na |
| chrUn | 75696376 | 75697551 | 1176 | CarSat1 | red    | na |
| chrUn | 75697578 | 75698047 | 470  | CarSat1 | red    | na |
| chrUn | 75698063 | 75698782 | 720  | CarSat1 | red    | na |
| chrUn | 75698798 | 75700496 | 1699 | CarSat1 | red    | na |
| chrUn | 75700523 | 75701233 | 711  | CarSat1 | red    | na |
| chrUn | 75701260 | 75703941 | 2682 | CarSat1 | red    | na |
| chrUn | 75703966 | 75704998 | 1033 | CarSat1 | red    | na |
| chrUn | 75706023 | 75706114 | 92   | Carsat2 | orange | na |
| chrUn | 75706033 | 75707879 | 1847 | CarSat1 | red    | na |
| chrUn | 75707909 | 75708617 | 709  | CarSat1 | red    | na |
| chrUn | 75708647 | 75709355 | 709  | CarSat1 | red    | na |
| chrUn | 75709370 | 75709497 | 128  | Carsat2 | orange | na |
| chrUn | 75709385 | 75710832 | 1448 | CarSat1 | red    | na |
| chrUn | 75710847 | 75710974 | 128  | Carsat2 | orange | na |
| chrUn | 75710862 | 75713778 | 2917 | CarSat1 | red    | na |
| chrUn | 75713808 | 75714662 | 855  | CarSat1 | red    | na |
| chrUn | 75715679 | 75717430 | 1752 | CarSat1 | red    | na |
| chrUn | 75717460 | 75720157 | 2698 | CarSat1 | red    | na |
| chrUn | 75720181 | 75722588 | 2408 | CarSat1 | red    | na |
| chrUn | 75722618 | 75723103 | 486  | CarSat1 | red    | na |
| chrUn | 75723127 | 75724294 | 1168 | CarSat1 | red    | na |
| chrUn | 75734929 | 75737953 | 3025 | CarSat1 | red    | na |
| chrUn | 75737980 | 75739427 | 1448 | CarSat1 | red    | na |
| chrUn | 75739454 | 75740660 | 1207 | CarSat1 | red    | na |
| chrUn | 75740676 | 75741638 | 963  | CarSat1 | red    | na |
| chrUn | 75741665 | 75743547 | 1883 | CarSat1 | red    | na |

|       |          |          |      |         |        |    |
|-------|----------|----------|------|---------|--------|----|
| chrUn | 75744555 | 75745454 | 900  | CarSat1 | red    | na |
| chrUn | 75745484 | 75746713 | 1230 | CarSat1 | red    | na |
| chrUn | 75746729 | 75747665 | 937  | CarSat1 | red    | na |
| chrUn | 75747695 | 75749414 | 1720 | CarSat1 | red    | na |
| chrUn | 75749439 | 75750149 | 711  | CarSat1 | red    | na |
| chrUn | 75750178 | 75750886 | 709  | CarSat1 | red    | na |
| chrUn | 75750915 | 75753160 | 2246 | CarSat1 | red    | na |
| chrUn | 75755724 | 75756039 | 316  | SAT1_CF | blue   | na |
| chrUn | 75763793 | 75765411 | 1619 | CarSat1 | red    | na |
| chrUn | 75765426 | 75765534 | 109  | Carsat2 | orange | na |
| chrUn | 75765441 | 75768354 | 2914 | CarSat1 | red    | na |
| chrUn | 75768384 | 75771298 | 2915 | CarSat1 | red    | na |
| chrUn | 75771328 | 75772401 | 1074 | CarSat1 | red    | na |
| chrUn | 75783029 | 75784204 | 1176 | CarSat1 | red    | na |
| chrUn | 75784231 | 75786906 | 2676 | CarSat1 | red    | na |
| chrUn | 75786933 | 75789109 | 2177 | CarSat1 | red    | na |
| chrUn | 75789136 | 75791590 | 2455 | CarSat1 | red    | na |
| chrUn | 75802233 | 75803074 | 842  | CarSat1 | red    | na |
| chrUn | 75803101 | 75804552 | 1452 | CarSat1 | red    | na |
| chrUn | 75804579 | 75805750 | 1172 | CarSat1 | red    | na |
| chrUn | 75805788 | 75807018 | 1231 | CarSat1 | red    | na |
| chrUn | 75807043 | 75807746 | 704  | CarSat1 | red    | na |
| chrUn | 75807771 | 75809871 | 2101 | CarSat1 | red    | na |
| chrUn | 75811851 | 75813019 | 1169 | CarSat1 | red    | na |
| chrUn | 75813050 | 75814638 | 1589 | CarSat1 | red    | na |
| chrUn | 75814669 | 75816258 | 1590 | CarSat1 | red    | na |
| chrUn | 75816289 | 75817738 | 1450 | CarSat1 | red    | na |
| chrUn | 75817977 | 75818854 | 878  | CarSat1 | red    | na |
| chrUn | 75831029 | 75831951 | 923  | CarSat1 | red    | na |
| chrUn | 75831978 | 75832688 | 711  | CarSat1 | red    | na |
| chrUn | 75832715 | 75833419 | 705  | CarSat1 | red    | na |
| chrUn | 75833446 | 75834155 | 710  | CarSat1 | red    | na |
| chrUn | 75834182 | 75836365 | 2184 | CarSat1 | red    | na |
| chrUn | 75836392 | 75837102 | 711  | CarSat1 | red    | na |
| chrUn | 75837129 | 75837598 | 470  | CarSat1 | red    | na |
| chrUn | 75837623 | 75839582 | 1960 | CarSat1 | red    | na |
| chrUn | 75860936 | 75861023 | 88   | CarSat1 | red    | na |
| chrUn | 75861244 | 75867284 | 6041 | CarSat1 | red    | na |
| chrUn | 75867315 | 75869466 | 2152 | CarSat1 | red    | na |
| chrUn | 75870481 | 75870863 | 383  | SAT1_CF | blue   | na |
| chrUn | 75870907 | 75872240 | 1334 | SAT1_CF | blue   | na |
| chrUn | 75872252 | 75873919 | 1668 | SAT1_CF | blue   | na |

|       |          |          |              |      |    |
|-------|----------|----------|--------------|------|----|
| chrUn | 75873933 | 75874616 | 684 SAT1_CF  | blue | na |
| chrUn | 75874629 | 75875130 | 502 SAT1_CF  | blue | na |
| chrUn | 75875143 | 75875502 | 360 SAT1_CF  | blue | na |
| chrUn | 75875513 | 75878378 | 2866 SAT1_CF | blue | na |
| chrUn | 75878405 | 75879041 | 637 SAT1_CF  | blue | na |
| chrUn | 75880051 | 75882578 | 2528 CarSat1 | red  | na |
| chrUn | 75882608 | 75886526 | 3919 CarSat1 | red  | na |
| chrUn | 75886547 | 75888546 | 2000 CarSat1 | red  | na |
| chrUn | 75889603 | 75890895 | 1293 CarSat1 | red  | na |
| chrUn | 75890922 | 75892370 | 1449 CarSat1 | red  | na |
| chrUn | 75892411 | 75893106 | 696 CarSat1  | red  | na |
| chrUn | 75893133 | 75894338 | 1206 CarSat1 | red  | na |
| chrUn | 75894354 | 75895315 | 962 CarSat1  | red  | na |
| chrUn | 75895342 | 75896546 | 1205 CarSat1 | red  | na |
| chrUn | 75896562 | 75897523 | 962 CarSat1  | red  | na |
| chrUn | 75897550 | 75898150 | 601 CarSat1  | red  | na |
| chrUn | 75899161 | 75900258 | 1098 CarSat1 | red  | na |
| chrUn | 75900274 | 75900994 | 721 CarSat1  | red  | na |
| chrUn | 75901010 | 75901476 | 467 CarSat1  | red  | na |
| chrUn | 75901503 | 75902465 | 963 CarSat1  | red  | na |
| chrUn | 75902481 | 75903690 | 1210 CarSat1 | red  | na |
| chrUn | 75903715 | 75904426 | 712 CarSat1  | red  | na |
| chrUn | 75904453 | 75904893 | 441 CarSat1  | red  | na |
| chrUn | 75904923 | 75905631 | 709 CarSat1  | red  | na |
| chrUn | 75905661 | 75906369 | 709 CarSat1  | red  | na |
| chrUn | 75906399 | 75907708 | 1310 CarSat1 | red  | na |
| chrUn | 75908711 | 75909474 | 764 CarSat1  | red  | na |
| chrUn | 75909490 | 75910206 | 717 CarSat1  | red  | na |
| chrUn | 75910222 | 75910942 | 721 CarSat1  | red  | na |
| chrUn | 75910958 | 75914399 | 3442 CarSat1 | red  | na |
| chrUn | 75914429 | 75917216 | 2788 CarSat1 | red  | na |
| chrUn | 75918324 | 75919770 | 1447 CarSat1 | red  | na |
| chrUn | 75919797 | 75921491 | 1695 CarSat1 | red  | na |
| chrUn | 75921507 | 75922713 | 1207 CarSat1 | red  | na |
| chrUn | 75922740 | 75923703 | 964 CarSat1  | red  | na |
| chrUn | 75923719 | 75924440 | 722 CarSat1  | red  | na |
| chrUn | 75924456 | 75925175 | 720 CarSat1  | red  | na |
| chrUn | 75925191 | 75926805 | 1615 CarSat1 | red  | na |
| chrUn | 75927812 | 75929609 | 1798 CarSat1 | red  | na |
| chrUn | 75929625 | 75930587 | 963 CarSat1  | red  | na |
| chrUn | 75930609 | 75931083 | 475 CarSat1  | red  | na |
| chrUn | 75931099 | 75932060 | 962 CarSat1  | red  | na |

|       |          |          |      |         |        |    |
|-------|----------|----------|------|---------|--------|----|
| chrUn | 75932087 | 75932798 | 712  | CarSat1 | red    | na |
| chrUn | 75932825 | 75934029 | 1205 | CarSat1 | red    | na |
| chrUn | 75934046 | 75935740 | 1695 | CarSat1 | red    | na |
| chrUn | 75935767 | 75936313 | 547  | CarSat1 | red    | na |
| chrUn | 75937656 | 75938905 | 1250 | CarSat1 | red    | na |
| chrUn | 75938921 | 75939642 | 722  | CarSat1 | red    | na |
| chrUn | 75939658 | 75940378 | 721  | CarSat1 | red    | na |
| chrUn | 75940394 | 75941362 | 969  | CarSat1 | red    | na |
| chrUn | 75941383 | 75942093 | 711  | CarSat1 | red    | na |
| chrUn | 75942120 | 75942830 | 711  | CarSat1 | red    | na |
| chrUn | 75942857 | 75943572 | 716  | CarSat1 | red    | na |
| chrUn | 75943593 | 75944305 | 713  | CarSat1 | red    | na |
| chrUn | 75944332 | 75945043 | 712  | CarSat1 | red    | na |
| chrUn | 75945070 | 75945882 | 813  | CarSat1 | red    | na |
| chrUn | 75946935 | 75948190 | 1256 | CarSat1 | red    | na |
| chrUn | 75948217 | 75949916 | 1700 | CarSat1 | red    | na |
| chrUn | 75949932 | 75950401 | 470  | CarSat1 | red    | na |
| chrUn | 75950428 | 75951132 | 705  | CarSat1 | red    | na |
| chrUn | 75951162 | 75952611 | 1450 | CarSat1 | red    | na |
| chrUn | 75952638 | 75954281 | 1644 | CarSat1 | red    | na |
| chrUn | 75954297 | 75955417 | 1121 | CarSat1 | red    | na |
| chrUn | 75956421 | 75957641 | 1221 | CarSat1 | red    | na |
| chrUn | 75957654 | 75960074 | 2421 | CarSat1 | red    | na |
| chrUn | 75960102 | 75960802 | 701  | CarSat1 | red    | na |
| chrUn | 75960842 | 75961819 | 978  | CarSat1 | red    | na |
| chrUn | 75961846 | 75963292 | 1447 | CarSat1 | red    | na |
| chrUn | 75963319 | 75964936 | 1618 | CarSat1 | red    | na |
| chrUn | 75965966 | 75967117 | 1152 | CarSat1 | red    | na |
| chrUn | 75967133 | 75967854 | 722  | CarSat1 | red    | na |
| chrUn | 75967870 | 75969539 | 1670 | CarSat1 | red    | na |
| chrUn | 75969578 | 75970275 | 698  | CarSat1 | red    | na |
| chrUn | 75970305 | 75974478 | 4174 | CarSat1 | red    | na |
| chrUn | 75975479 | 75977155 | 1677 | CarSat1 | red    | na |
| chrUn | 75977182 | 75978358 | 1177 | CarSat1 | red    | na |
| chrUn | 75978373 | 75978500 | 128  | Carsat2 | orange | na |
| chrUn | 75978388 | 75979610 | 1223 | CarSat1 | red    | na |
| chrUn | 75979643 | 75980356 | 714  | CarSat1 | red    | na |
| chrUn | 75980381 | 75981576 | 1196 | CarSat1 | red    | na |
| chrUn | 75981603 | 75982042 | 440  | CarSat1 | red    | na |
| chrUn | 75982072 | 75983981 | 1910 | CarSat1 | red    | na |
| chrUn | 75985001 | 75987820 | 2820 | CarSat1 | red    | na |
| chrUn | 75987845 | 75988809 | 965  | CarSat1 | red    | na |

|       |          |          |              |        |    |
|-------|----------|----------|--------------|--------|----|
| chrUn | 75988836 | 75989546 | 711 CarSat1  | red    | na |
| chrUn | 75989573 | 75991287 | 1715 CarSat1 | red    | na |
| chrUn | 75991317 | 75992493 | 1177 CarSat1 | red    | na |
| chrUn | 75992520 | 75993498 | 979 CarSat1  | red    | na |
| chrUn | 75994542 | 75995754 | 1213 CarSat1 | red    | na |
| chrUn | 75995784 | 75997005 | 1222 CarSat1 | red    | na |
| chrUn | 75997030 | 75997741 | 712 CarSat1  | red    | na |
| chrUn | 75997766 | 75998984 | 1219 CarSat1 | red    | na |
| chrUn | 75999011 | 76000701 | 1691 CarSat1 | red    | na |
| chrUn | 76000726 | 76001435 | 710 CarSat1  | red    | na |
| chrUn | 76001460 | 76003017 | 1558 CarSat1 | red    | na |
| chrUn | 76013539 | 76014250 | 712 CarSat1  | red    | na |
| chrUn | 76014265 | 76014392 | 128 Carsat2  | orange | na |
| chrUn | 76014280 | 76014988 | 709 CarSat1  | red    | na |
| chrUn | 76015018 | 76015729 | 712 CarSat1  | red    | na |
| chrUn | 76015744 | 76015870 | 127 Carsat2  | orange | na |
| chrUn | 76015759 | 76016468 | 710 CarSat1  | red    | na |
| chrUn | 76016483 | 76016609 | 127 Carsat2  | orange | na |
| chrUn | 76016498 | 76017204 | 707 CarSat1  | red    | na |
| chrUn | 76017219 | 76017345 | 127 Carsat2  | orange | na |
| chrUn | 76017234 | 76017940 | 707 CarSat1  | red    | na |
| chrUn | 76017970 | 76018599 | 630 CarSat1  | red    | na |
| chrUn | 76018746 | 76020274 | 1529 CarSat1 | red    | na |
| chrUn | 76020304 | 76021015 | 712 CarSat1  | red    | na |
| chrUn | 76021030 | 76021156 | 127 Carsat2  | orange | na |
| chrUn | 76021045 | 76022021 | 977 CarSat1  | red    | na |
| chrUn | 76023063 | 76024862 | 1800 CarSat1 | red    | na |
| chrUn | 76024892 | 76027346 | 2455 CarSat1 | red    | na |
| chrUn | 76027367 | 76029284 | 1918 CarSat1 | red    | na |
| chrUn | 76029314 | 76030349 | 1036 CarSat1 | red    | na |
| chrUn | 76030371 | 76031074 | 704 CarSat1  | red    | na |
| chrUn | 76042020 | 76042831 | 812 CarSat1  | red    | na |
| chrUn | 76042856 | 76043810 | 955 CarSat1  | red    | na |
| chrUn | 76043837 | 76044816 | 980 CarSat1  | red    | na |
| chrUn | 76044846 | 76045554 | 709 CarSat1  | red    | na |
| chrUn | 76045584 | 76046292 | 709 CarSat1  | red    | na |
| chrUn | 76046322 | 76047500 | 1179 CarSat1 | red    | na |
| chrUn | 76047527 | 76048238 | 712 CarSat1  | red    | na |
| chrUn | 76048265 | 76048975 | 711 CarSat1  | red    | na |
| chrUn | 76049002 | 76050444 | 1443 CarSat1 | red    | na |
| chrUn | 76051551 | 76052036 | 486 CarSat1  | red    | na |
| chrUn | 76052066 | 76052987 | 922 CarSat1  | red    | na |

|       |          |          |      |         |      |    |
|-------|----------|----------|------|---------|------|----|
| chrUn | 76053020 | 76054243 | 1224 | CarSat1 | red  | na |
| chrUn | 76054273 | 76054980 | 708  | CarSat1 | red  | na |
| chrUn | 76055010 | 76056800 | 1791 | CarSat1 | red  | na |
| chrUn | 76056815 | 76057521 | 707  | CarSat1 | red  | na |
| chrUn | 76057551 | 76059954 | 2404 | CarSat1 | red  | na |
| chrUn | 76070447 | 76071359 | 913  | CarSat1 | red  | na |
| chrUn | 76071389 | 76073786 | 2398 | CarSat1 | red  | na |
| chrUn | 76073818 | 76078204 | 4387 | CarSat1 | red  | na |
| chrUn | 76078237 | 76078911 | 675  | CarSat1 | red  | na |
| chrUn | 76079923 | 76080516 | 594  | CarSat1 | red  | na |
| chrUn | 76080537 | 76081004 | 468  | CarSat1 | red  | na |
| chrUn | 76081029 | 76087375 | 6347 | CarSat1 | red  | na |
| chrUn | 76087410 | 76088363 | 954  | CarSat1 | red  | na |
| chrUn | 76089368 | 76090491 | 1124 | CarSat1 | red  | na |
| chrUn | 76090518 | 76091966 | 1449 | CarSat1 | red  | na |
| chrUn | 76091993 | 76093201 | 1209 | CarSat1 | red  | na |
| chrUn | 76093226 | 76094178 | 953  | CarSat1 | red  | na |
| chrUn | 76094205 | 76094915 | 711  | CarSat1 | red  | na |
| chrUn | 76094942 | 76095410 | 469  | CarSat1 | red  | na |
| chrUn | 76095435 | 76096146 | 712  | CarSat1 | red  | na |
| chrUn | 76096162 | 76096760 | 599  | CarSat1 | red  | na |
| chrUn | 76096862 | 76097809 | 948  | CarSat1 | red  | na |
| chrUn | 76098816 | 76101955 | 3140 | CarSat1 | red  | na |
| chrUn | 76101985 | 76102920 | 936  | CarSat1 | red  | na |
| chrUn | 76102936 | 76103898 | 963  | CarSat1 | red  | na |
| chrUn | 76103925 | 76106108 | 2184 | CarSat1 | red  | na |
| chrUn | 76106135 | 76107246 | 1112 | CarSat1 | red  | na |
| chrUn | 76108252 | 76110491 | 2240 | CarSat1 | red  | na |
| chrUn | 76110507 | 76110976 | 470  | CarSat1 | red  | na |
| chrUn | 76111003 | 76111714 | 712  | CarSat1 | red  | na |
| chrUn | 76111741 | 76113187 | 1447 | CarSat1 | red  | na |
| chrUn | 76113214 | 76114174 | 961  | CarSat1 | red  | na |
| chrUn | 76114190 | 76114658 | 469  | CarSat1 | red  | na |
| chrUn | 76114685 | 76115394 | 710  | CarSat1 | red  | na |
| chrUn | 76115421 | 76116131 | 711  | CarSat1 | red  | na |
| chrUn | 76116158 | 76116679 | 522  | CarSat1 | red  | na |
| chrUn | 76117684 | 76118918 | 1235 | SAT1_CF | blue | na |
| chrUn | 76118962 | 76120055 | 1094 | SAT1_CF | blue | na |
| chrUn | 76120067 | 76120956 | 890  | SAT1_CF | blue | na |
| chrUn | 76120970 | 76122338 | 1369 | SAT1_CF | blue | na |
| chrUn | 76122384 | 76122902 | 519  | SAT1_CF | blue | na |
| chrUn | 76122983 | 76124109 | 1127 | SAT1_CF | blue | na |

|       |          |          |              |      |    |
|-------|----------|----------|--------------|------|----|
| chrUn | 76124165 | 76124645 | 481 SAT1_CF  | blue | na |
| chrUn | 76124657 | 76125374 | 718 SAT1_CF  | blue | na |
| chrUn | 76125455 | 76126073 | 619 SAT1_CF  | blue | na |
| chrUn | 76127110 | 76129404 | 2295 CarSat1 | red  | na |
| chrUn | 76129431 | 76129900 | 470 CarSat1  | red  | na |
| chrUn | 76129916 | 76130880 | 965 CarSat1  | red  | na |
| chrUn | 76130907 | 76131375 | 469 CarSat1  | red  | na |
| chrUn | 76131391 | 76132353 | 963 CarSat1  | red  | na |
| chrUn | 76132380 | 76133825 | 1446 CarSat1 | red  | na |
| chrUn | 76133852 | 76135529 | 1678 CarSat1 | red  | na |
| chrUn | 76147742 | 76148895 | 1154 CarSat1 | red  | na |
| chrUn | 76148926 | 76150524 | 1599 CarSat1 | red  | na |
| chrUn | 76150545 | 76152133 | 1589 CarSat1 | red  | na |
| chrUn | 76152164 | 76153762 | 1599 CarSat1 | red  | na |
| chrUn | 76153783 | 76155371 | 1589 CarSat1 | red  | na |
| chrUn | 76155402 | 76156161 | 760 CarSat1  | red  | na |
| chrUn | 76157168 | 76158839 | 1672 CarSat1 | red  | na |
| chrUn | 76158863 | 76160086 | 1224 CarSat1 | red  | na |
| chrUn | 76160116 | 76160827 | 712 CarSat1  | red  | na |
| chrUn | 76160857 | 76162528 | 1672 CarSat1 | red  | na |
| chrUn | 76162552 | 76164512 | 1961 CarSat1 | red  | na |
| chrUn | 76164542 | 76165555 | 1014 CarSat1 | red  | na |
| chrUn | 76166595 | 76168055 | 1461 CarSat1 | red  | na |
| chrUn | 76168080 | 76169520 | 1441 CarSat1 | red  | na |
| chrUn | 76169545 | 76170988 | 1444 CarSat1 | red  | na |
| chrUn | 76171014 | 76171736 | 723 CarSat1  | red  | na |
| chrUn | 76171761 | 76172958 | 1198 CarSat1 | red  | na |
| chrUn | 76172985 | 76174434 | 1450 CarSat1 | red  | na |
| chrUn | 76174455 | 76174981 | 527 CarSat1  | red  | na |
| chrUn | 76185413 | 76185583 | 171 CarSat1  | red  | na |
| chrUn | 76185770 | 76186846 | 1077 CarSat1 | red  | na |
| chrUn | 76186867 | 76190279 | 3413 CarSat1 | red  | na |
| chrUn | 76190304 | 76191748 | 1445 CarSat1 | red  | na |
| chrUn | 76191773 | 76192475 | 703 CarSat1  | red  | na |
| chrUn | 76192500 | 76193213 | 714 CarSat1  | red  | na |
| chrUn | 76193247 | 76193820 | 574 CarSat1  | red  | na |
| chrUn | 76217085 | 76218149 | 1065 CarSat1 | red  | na |
| chrUn | 76218179 | 76223087 | 4909 CarSat1 | red  | na |
| chrUn | 76223112 | 76224572 | 1461 CarSat1 | red  | na |
| chrUn | 76224599 | 76225408 | 810 CarSat1  | red  | na |
| chrUn | 76226490 | 76227893 | 1404 CarSat1 | red  | na |
| chrUn | 76227908 | 76228614 | 707 CarSat1  | red  | na |



|       |          |          |      |         |      |    |
|-------|----------|----------|------|---------|------|----|
| chrUn | 76228644 | 76230101 | 1458 | CarSat1 | red  | na |
| chrUn | 76230116 | 76231041 | 926  | CarSat1 | red  | na |
| chrUn | 76231066 | 76231779 | 714  | CarSat1 | red  | na |
| chrUn | 76231812 | 76232311 | 500  | CarSat1 | red  | na |
| chrUn | 76232326 | 76233045 | 720  | CarSat1 | red  | na |
| chrUn | 76233060 | 76234865 | 1806 | CarSat1 | red  | na |
| chrUn | 76245280 | 76245864 | 585  | CarSat1 | red  | na |
| chrUn | 76245891 | 76248076 | 2186 | CarSat1 | red  | na |
| chrUn | 76248103 | 76248571 | 469  | CarSat1 | red  | na |
| chrUn | 76248587 | 76249551 | 965  | CarSat1 | red  | na |
| chrUn | 76249578 | 76250047 | 470  | CarSat1 | red  | na |
| chrUn | 76250063 | 76251289 | 1227 | CarSat1 | red  | na |
| chrUn | 76251320 | 76251758 | 439  | CarSat1 | red  | na |
| chrUn | 76251785 | 76252991 | 1207 | CarSat1 | red  | na |
| chrUn | 76253007 | 76253659 | 653  | CarSat1 | red  | na |
| chrUn | 76254754 | 76256280 | 1527 | SAT1_CF | blue | na |
| chrUn | 76256292 | 76257222 | 931  | SAT1_CF | blue | na |
| chrUn | 76258227 | 76258573 | 347  | SAT1_CF | blue | na |
| chrUn | 76258602 | 76259240 | 639  | SAT1_CF | blue | na |
| chrUn | 76259292 | 76260039 | 748  | SAT1_CF | blue | na |
| chrUn | 76260206 | 76261055 | 850  | SAT1_CF | blue | na |
| chrUn | 76261073 | 76262270 | 1198 | SAT1_CF | blue | na |
| chrUn | 76262306 | 76262491 | 186  | SAT1_CF | blue | na |
| chrUn | 76262672 | 76263508 | 837  | SAT1_CF | blue | na |
| chrUn | 76263520 | 76264063 | 544  | SAT1_CF | blue | na |
| chrUn | 76265075 | 76267306 | 2232 | CarSat1 | red  | na |
| chrUn | 76267336 | 76268059 | 724  | CarSat1 | red  | na |
| chrUn | 76268074 | 76271493 | 3420 | CarSat1 | red  | na |
| chrUn | 76271520 | 76272230 | 711  | CarSat1 | red  | na |
| chrUn | 76272257 | 76273453 | 1197 | CarSat1 | red  | na |
| chrUn | 76274462 | 76275691 | 1230 | CarSat1 | red  | na |
| chrUn | 76275721 | 76277165 | 1445 | CarSat1 | red  | na |
| chrUn | 76277195 | 76278372 | 1178 | CarSat1 | red  | na |
| chrUn | 76278403 | 76278867 | 465  | CarSat1 | red  | na |
| chrUn | 76278883 | 76281320 | 2438 | CarSat1 | red  | na |
| chrUn | 76281347 | 76282057 | 711  | CarSat1 | red  | na |
| chrUn | 76282084 | 76282795 | 712  | CarSat1 | red  | na |
| chrUn | 76283843 | 76284397 | 555  | CarSat1 | red  | na |
| chrUn | 76284424 | 76285134 | 711  | CarSat1 | red  | na |
| chrUn | 76285161 | 76287096 | 1936 | CarSat1 | red  | na |
| chrUn | 76287121 | 76288083 | 963  | CarSat1 | red  | na |
| chrUn | 76288110 | 76289305 | 1196 | CarSat1 | red  | na |

|       |          |          |      |         |        |    |
|-------|----------|----------|------|---------|--------|----|
| chrUn | 76289339 | 76290042 | 704  | CarSat1 | red    | na |
| chrUn | 76290067 | 76292217 | 2151 | CarSat1 | red    | na |
| chrUn | 76302599 | 76302726 | 128  | Carsat2 | orange | na |
| chrUn | 76302614 | 76305066 | 2453 | CarSat1 | red    | na |
| chrUn | 76305093 | 76306056 | 964  | CarSat1 | red    | na |
| chrUn | 76306081 | 76308750 | 2670 | CarSat1 | red    | na |
| chrUn | 76308771 | 76310889 | 2119 | CarSat1 | red    | na |
| chrUn | 76311936 | 76313452 | 1517 | CarSat1 | red    | na |
| chrUn | 76313477 | 76314676 | 1200 | CarSat1 | red    | na |
| chrUn | 76314703 | 76319112 | 4410 | CarSat1 | red    | na |
| chrUn | 76319128 | 76320292 | 1165 | CarSat1 | red    | na |
| chrUn | 76321298 | 76324137 | 2840 | CarSat1 | red    | na |
| chrUn | 76324167 | 76325107 | 941  | CarSat1 | red    | na |
| chrUn | 76325131 | 76325849 | 719  | CarSat1 | red    | na |
| chrUn | 76325873 | 76327092 | 1220 | CarSat1 | red    | na |
| chrUn | 76327121 | 76328057 | 937  | CarSat1 | red    | na |
| chrUn | 76328081 | 76328795 | 715  | CarSat1 | red    | na |
| chrUn | 76328819 | 76329647 | 829  | CarSat1 | red    | na |
| chrUn | 76363570 | 76364367 | 798  | CarSat1 | red    | na |
| chrUn | 76364392 | 76364977 | 586  | CarSat1 | red    | na |
| chrUn | 76365068 | 76366604 | 1537 | CarSat1 | red    | na |
| chrUn | 76366629 | 76367581 | 953  | CarSat1 | red    | na |
| chrUn | 76367608 | 76368805 | 1198 | CarSat1 | red    | na |
| chrUn | 76368830 | 76370069 | 1240 | CarSat1 | red    | na |
| chrUn | 76370099 | 76371035 | 937  | CarSat1 | red    | na |
| chrUn | 76371060 | 76371911 | 852  | CarSat1 | red    | na |
| chrUn | 76373157 | 76374422 | 1266 | CarSat1 | red    | na |
| chrUn | 76374443 | 76375435 | 993  | CarSat1 | red    | na |
| chrUn | 76375450 | 76376156 | 707  | CarSat1 | red    | na |
| chrUn | 76376186 | 76376907 | 722  | CarSat1 | red    | na |
| chrUn | 76376922 | 76378839 | 1918 | CarSat1 | red    | na |
| chrUn | 76378866 | 76381223 | 2358 | CarSat1 | red    | na |
| chrUn | 76391590 | 76396498 | 4909 | CarSat1 | red    | na |
| chrUn | 76396514 | 76397234 | 721  | CarSat1 | red    | na |
| chrUn | 76397263 | 76399450 | 2188 | CarSat1 | red    | na |
| chrUn | 76399475 | 76399919 | 445  | CarSat1 | red    | na |
| chrUn | 76400971 | 76401554 | 584  | CarSat1 | red    | na |
| chrUn | 76401570 | 76403027 | 1458 | CarSat1 | red    | na |
| chrUn | 76403043 | 76403707 | 665  | CarSat1 | red    | na |
| chrUn | 76403896 | 76404945 | 1050 | CarSat1 | red    | na |
| chrUn | 76404972 | 76406683 | 1712 | CarSat1 | red    | na |
| chrUn | 76406713 | 76407649 | 937  | CarSat1 | red    | na |

|       |          |          |      |         |        |    |
|-------|----------|----------|------|---------|--------|----|
| chrUn | 76407665 | 76408386 | 722  | CarSat1 | red    | na |
| chrUn | 76408402 | 76409251 | 850  | CarSat1 | red    | na |
| chrUn | 76410251 | 76411359 | 1109 | CarSat1 | red    | na |
| chrUn | 76411375 | 76412337 | 963  | CarSat1 | red    | na |
| chrUn | 76412364 | 76412833 | 470  | CarSat1 | red    | na |
| chrUn | 76412849 | 76413569 | 721  | CarSat1 | red    | na |
| chrUn | 76413585 | 76414305 | 721  | CarSat1 | red    | na |
| chrUn | 76414321 | 76415040 | 720  | CarSat1 | red    | na |
| chrUn | 76415056 | 76415766 | 711  | CarSat1 | red    | na |
| chrUn | 76415792 | 76416512 | 721  | CarSat1 | red    | na |
| chrUn | 76416528 | 76417985 | 1458 | CarSat1 | red    | na |
| chrUn | 76418001 | 76418568 | 568  | CarSat1 | red    | na |
| chrUn | 76419573 | 76420149 | 577  | CarSat1 | red    | na |
| chrUn | 76420165 | 76420885 | 721  | CarSat1 | red    | na |
| chrUn | 76420910 | 76421621 | 712  | CarSat1 | red    | na |
| chrUn | 76421646 | 76422358 | 713  | CarSat1 | red    | na |
| chrUn | 76422383 | 76422843 | 461  | CarSat1 | red    | na |
| chrUn | 76422870 | 76423830 | 961  | CarSat1 | red    | na |
| chrUn | 76423863 | 76424558 | 696  | CarSat1 | red    | na |
| chrUn | 76424583 | 76425051 | 469  | CarSat1 | red    | na |
| chrUn | 76425078 | 76427871 | 2794 | CarSat1 | red    | na |
| chrUn | 76438220 | 76439917 | 1698 | CarSat1 | red    | na |
| chrUn | 76439943 | 76440646 | 704  | CarSat1 | red    | na |
| chrUn | 76440680 | 76443350 | 2671 | CarSat1 | red    | na |
| chrUn | 76443377 | 76444085 | 709  | CarSat1 | red    | na |
| chrUn | 76444112 | 76444822 | 711  | CarSat1 | red    | na |
| chrUn | 76444849 | 76445558 | 710  | CarSat1 | red    | na |
| chrUn | 76445585 | 76446462 | 878  | CarSat1 | red    | na |
| chrUn | 76447496 | 76448195 | 700  | CarSat1 | red    | na |
| chrUn | 76448210 | 76448337 | 128  | Carsat2 | orange | na |
| chrUn | 76448225 | 76448937 | 713  | CarSat1 | red    | na |
| chrUn | 76448967 | 76449675 | 709  | CarSat1 | red    | na |
| chrUn | 76449690 | 76449817 | 128  | Carsat2 | orange | na |
| chrUn | 76449705 | 76450417 | 713  | CarSat1 | red    | na |
| chrUn | 76450432 | 76450558 | 127  | Carsat2 | orange | na |
| chrUn | 76450447 | 76454110 | 3664 | CarSat1 | red    | na |
| chrUn | 76454125 | 76454252 | 128  | Carsat2 | orange | na |
| chrUn | 76454140 | 76454852 | 713  | CarSat1 | red    | na |
| chrUn | 76454867 | 76454993 | 127  | Carsat2 | orange | na |
| chrUn | 76454882 | 76455671 | 790  | CarSat1 | red    | na |
| chrUn | 76469139 | 76470902 | 1764 | CarSat1 | red    | na |
| chrUn | 76470923 | 76472130 | 1208 | CarSat1 | red    | na |

|       |          |          |      |         |        |    |
|-------|----------|----------|------|---------|--------|----|
| chrUn | 76472155 | 76473115 | 961  | CarSat1 | red    | na |
| chrUn | 76473140 | 76474343 | 1204 | CarSat1 | red    | na |
| chrUn | 76474365 | 76475077 | 713  | CarSat1 | red    | na |
| chrUn | 76475102 | 76476324 | 1223 | CarSat1 | red    | na |
| chrUn | 76476361 | 76477365 | 1005 | CarSat1 | red    | na |
| chrUn | 76500647 | 76500975 | 329  | Sat15CF | na     | na |
| chrUn | 76519613 | 76521148 | 1536 | CarSat1 | red    | na |
| chrUn | 76521175 | 76522356 | 1182 | CarSat1 | red    | na |
| chrUn | 76522386 | 76523824 | 1439 | CarSat1 | red    | na |
| chrUn | 76523858 | 76524566 | 709  | CarSat1 | red    | na |
| chrUn | 76524582 | 76524704 | 123  | Carsat2 | orange | na |
| chrUn | 76524596 | 76525304 | 709  | CarSat1 | red    | na |
| chrUn | 76525332 | 76526564 | 1233 | CarSat1 | red    | na |
| chrUn | 76526596 | 76527874 | 1279 | CarSat1 | red    | na |
| chrUn | 76528879 | 76529401 | 523  | CarSat1 | red    | na |
| chrUn | 76529428 | 76530878 | 1451 | CarSat1 | red    | na |
| chrUn | 76530905 | 76531614 | 710  | CarSat1 | red    | na |
| chrUn | 76531641 | 76532620 | 980  | CarSat1 | red    | na |
| chrUn | 76532650 | 76535057 | 2408 | CarSat1 | red    | na |
| chrUn | 76535073 | 76537146 | 2074 | CarSat1 | red    | na |
| chrUn | 76538154 | 76540237 | 2084 | CarSat1 | red    | na |
| chrUn | 76540262 | 76540984 | 723  | CarSat1 | red    | na |
| chrUn | 76541000 | 76541961 | 962  | CarSat1 | red    | na |
| chrUn | 76541988 | 76542694 | 707  | CarSat1 | red    | na |
| chrUn | 76542721 | 76543432 | 712  | CarSat1 | red    | na |
| chrUn | 76543459 | 76544666 | 1208 | CarSat1 | red    | na |
| chrUn | 76544682 | 76546384 | 1703 | CarSat1 | red    | na |
| chrUn | 76547433 | 76547620 | 188  | Carsat2 | orange | na |
| chrUn | 76547452 | 76548648 | 1197 | CarSat1 | red    | na |
| chrUn | 76548663 | 76548777 | 115  | Carsat2 | orange | na |
| chrUn | 76548678 | 76549392 | 715  | CarSat1 | red    | na |
| chrUn | 76549422 | 76550133 | 712  | CarSat1 | red    | na |
| chrUn | 76550163 | 76550657 | 495  | CarSat1 | red    | na |
| chrUn | 76550682 | 76551392 | 711  | CarSat1 | red    | na |
| chrUn | 76551426 | 76551885 | 460  | CarSat1 | red    | na |
| chrUn | 76551906 | 76552599 | 694  | CarSat1 | red    | na |
| chrUn | 76552624 | 76552788 | 165  | Carsat2 | orange | na |
| chrUn | 76552646 | 76555697 | 3052 | CarSat1 | red    | na |
| chrUn | 76556713 | 76558607 | 1895 | CarSat1 | red    | na |
| chrUn | 76558633 | 76560826 | 2194 | CarSat1 | red    | na |
| chrUn | 76560851 | 76561809 | 959  | CarSat1 | red    | na |
| chrUn | 76561830 | 76562298 | 469  | CarSat1 | red    | na |

|       |          |          |      |         |      |    |
|-------|----------|----------|------|---------|------|----|
| chrUn | 76562323 | 76563025 | 703  | CarSat1 | red  | na |
| chrUn | 76563050 | 76563767 | 718  | CarSat1 | red  | na |
| chrUn | 76563792 | 76564947 | 1156 | CarSat1 | red  | na |
| chrUn | 76575222 | 76575811 | 590  | CarSat1 | red  | na |
| chrUn | 76575836 | 76577286 | 1451 | CarSat1 | red  | na |
| chrUn | 76577311 | 76577779 | 469  | CarSat1 | red  | na |
| chrUn | 76577800 | 76578756 | 957  | CarSat1 | red  | na |
| chrUn | 76578781 | 76579503 | 723  | CarSat1 | red  | na |
| chrUn | 76579528 | 76580451 | 924  | CarSat1 | red  | na |
| chrUn | 76580481 | 76582193 | 1713 | CarSat1 | red  | na |
| chrUn | 76582226 | 76582664 | 439  | CarSat1 | red  | na |
| chrUn | 76582694 | 76583468 | 775  | CarSat1 | red  | na |
| chrUn | 76594064 | 76594534 | 471  | CarSat1 | red  | na |
| chrUn | 76594561 | 76598224 | 3664 | CarSat1 | red  | na |
| chrUn | 76598245 | 76598713 | 469  | CarSat1 | red  | na |
| chrUn | 76598738 | 76601165 | 2428 | CarSat1 | red  | na |
| chrUn | 76601192 | 76602167 | 976  | CarSat1 | red  | na |
| chrUn | 76603278 | 76603703 | 426  | CarSat1 | red  | na |
| chrUn | 76603728 | 76604689 | 962  | CarSat1 | red  | na |
| chrUn | 76604716 | 76606165 | 1450 | CarSat1 | red  | na |
| chrUn | 76606192 | 76608376 | 2185 | CarSat1 | red  | na |
| chrUn | 76608403 | 76609112 | 710  | CarSat1 | red  | na |
| chrUn | 76609140 | 76611522 | 2383 | CarSat1 | red  | na |
| chrUn | 76612529 | 76613351 | 823  | CarSat1 | red  | na |
| chrUn | 76613388 | 76615296 | 1909 | CarSat1 | red  | na |
| chrUn | 76615323 | 76616035 | 713  | CarSat1 | red  | na |
| chrUn | 76616062 | 76616773 | 712  | CarSat1 | red  | na |
| chrUn | 76616805 | 76617509 | 705  | CarSat1 | red  | na |
| chrUn | 76617536 | 76620216 | 2681 | CarSat1 | red  | na |
| chrUn | 76620241 | 76620723 | 483  | CarSat1 | red  | na |
| chrUn | 76621765 | 76624188 | 2424 | SAT1_CF | blue | na |
| chrUn | 76624231 | 76624756 | 526  | SAT1_CF | blue | na |
| chrUn | 76624771 | 76627508 | 2738 | SAT1_CF | blue | na |
| chrUn | 76627555 | 76627681 | 127  | SAT1_CF | blue | na |
| chrUn | 76627701 | 76629037 | 1337 | SAT1_CF | blue | na |
| chrUn | 76629049 | 76629994 | 946  | SAT1_CF | blue | na |
| chrUn | 76640238 | 76640799 | 562  | CarSat1 | red  | na |
| chrUn | 76640826 | 76642032 | 1207 | CarSat1 | red  | na |
| chrUn | 76642048 | 76643503 | 1456 | CarSat1 | red  | na |
| chrUn | 76643519 | 76644481 | 963  | CarSat1 | red  | na |
| chrUn | 76644508 | 76645659 | 1152 | CarSat1 | red  | na |
| chrUn | 76645813 | 76647635 | 1823 | CarSat1 | red  | na |

|       |          |          |      |         |        |    |
|-------|----------|----------|------|---------|--------|----|
| chrUn | 76647662 | 76648452 | 791  | CarSat1 | red    | na |
| chrUn | 76649468 | 76651102 | 1635 | CarSat1 | red    | na |
| chrUn | 76651118 | 76652081 | 964  | CarSat1 | red    | na |
| chrUn | 76652108 | 76653313 | 1206 | CarSat1 | red    | na |
| chrUn | 76653329 | 76654291 | 963  | CarSat1 | red    | na |
| chrUn | 76654318 | 76654786 | 469  | CarSat1 | red    | na |
| chrUn | 76654802 | 76655764 | 963  | CarSat1 | red    | na |
| chrUn | 76655791 | 76656502 | 712  | CarSat1 | red    | na |
| chrUn | 76656529 | 76656998 | 470  | CarSat1 | red    | na |
| chrUn | 76657014 | 76657687 | 674  | CarSat1 | red    | na |
| chrUn | 76658687 | 76666904 | 8218 | CarSat1 | red    | na |
| chrUn | 76678738 | 76680186 | 1449 | CarSat1 | red    | na |
| chrUn | 76680213 | 76680922 | 710  | CarSat1 | red    | na |
| chrUn | 76680949 | 76681912 | 964  | CarSat1 | red    | na |
| chrUn | 76681928 | 76682865 | 938  | CarSat1 | red    | na |
| chrUn | 76682895 | 76684126 | 1232 | CarSat1 | red    | na |
| chrUn | 76684142 | 76685599 | 1458 | CarSat1 | red    | na |
| chrUn | 76685615 | 76686885 | 1271 | CarSat1 | red    | na |
| chrUn | 76687893 | 76688053 | 161  | Carsat2 | orange | na |
| chrUn | 76687916 | 76689369 | 1454 | CarSat1 | red    | na |
| chrUn | 76689396 | 76692317 | 2922 | CarSat1 | red    | na |
| chrUn | 76692344 | 76693052 | 709  | CarSat1 | red    | na |
| chrUn | 76693079 | 76693790 | 712  | CarSat1 | red    | na |
| chrUn | 76693814 | 76696086 | 2273 | CarSat1 | red    | na |
| chrUn | 76717575 | 76718216 | 642  | CarSat1 | red    | na |
| chrUn | 76718243 | 76720435 | 2193 | CarSat1 | red    | na |
| chrUn | 76720462 | 76722647 | 2186 | CarSat1 | red    | na |
| chrUn | 76722676 | 76725760 | 3085 | CarSat1 | red    | na |
| chrUn | 76726812 | 76728855 | 2044 | CarSat1 | red    | na |
| chrUn | 76728882 | 76729591 | 710  | CarSat1 | red    | na |
| chrUn | 76729618 | 76730327 | 710  | CarSat1 | red    | na |
| chrUn | 76730355 | 76731550 | 1196 | CarSat1 | red    | na |
| chrUn | 76731575 | 76732539 | 965  | CarSat1 | red    | na |
| chrUn | 76732566 | 76733545 | 980  | CarSat1 | red    | na |
| chrUn | 76733575 | 76734929 | 1355 | CarSat1 | red    | na |
| chrUn | 76756572 | 76757078 | 507  | Sat82CF | na     | na |
| chrUn | 76757495 | 76758807 | 1313 | Sat82CF | na     | na |
| chrUn | 76758435 | 76758850 | 416  | Sat82CF | na     | na |
| chrUn | 76763531 | 76765363 | 1833 | CarSat1 | red    | na |
| chrUn | 76765390 | 76765859 | 470  | CarSat1 | red    | na |
| chrUn | 76765884 | 76767106 | 1223 | CarSat1 | red    | na |
| chrUn | 76767136 | 76767842 | 707  | CarSat1 | red    | na |

|       |          |          |      |         |        |    |
|-------|----------|----------|------|---------|--------|----|
| chrUn | 76767872 | 76768312 | 441  | CarSat1 | red    | na |
| chrUn | 76768339 | 76769047 | 709  | CarSat1 | red    | na |
| chrUn | 76769074 | 76770524 | 1451 | CarSat1 | red    | na |
| chrUn | 76770551 | 76771704 | 1154 | CarSat1 | red    | na |
| chrUn | 76772706 | 76773696 | 991  | CarSat1 | red    | na |
| chrUn | 76781879 | 76783026 | 1148 | SAT1_CF | blue   | na |
| chrUn | 76783070 | 76783744 | 675  | SAT1_CF | blue   | na |
| chrUn | 76783978 | 76785349 | 1372 | SAT1_CF | blue   | na |
| chrUn | 76785371 | 76785478 | 108  | SAT1_CF | blue   | na |
| chrUn | 76785491 | 76785813 | 323  | SAT1_CF | blue   | na |
| chrUn | 76786367 | 76787113 | 747  | SAT1_CF | blue   | na |
| chrUn | 76787156 | 76787672 | 517  | SAT1_CF | blue   | na |
| chrUn | 76787734 | 76788313 | 580  | SAT1_CF | blue   | na |
| chrUn | 76788349 | 76788534 | 186  | SAT1_CF | blue   | na |
| chrUn | 76788717 | 76788882 | 166  | SAT1_CF | blue   | na |
| chrUn | 76788963 | 76789931 | 969  | SAT1_CF | blue   | na |
| chrUn | 76789975 | 76790492 | 518  | SAT1_CF | blue   | na |
| chrUn | 76790506 | 76790767 | 262  | SAT1_CF | blue   | na |
| chrUn | 76791799 | 76793161 | 1363 | CarSat1 | red    | na |
| chrUn | 76793177 | 76793890 | 714  | CarSat1 | red    | na |
| chrUn | 76793915 | 76795375 | 1461 | CarSat1 | red    | na |
| chrUn | 76795391 | 76796109 | 719  | CarSat1 | red    | na |
| chrUn | 76796125 | 76796846 | 722  | CarSat1 | red    | na |
| chrUn | 76796862 | 76797825 | 964  | CarSat1 | red    | na |
| chrUn | 76797852 | 76798561 | 710  | CarSat1 | red    | na |
| chrUn | 76798588 | 76799057 | 470  | CarSat1 | red    | na |
| chrUn | 76799073 | 76799966 | 894  | CarSat1 | red    | na |
| chrUn | 76800968 | 76801911 | 944  | CarSat1 | red    | na |
| chrUn | 76801938 | 76803854 | 1917 | CarSat1 | red    | na |
| chrUn | 76803868 | 76803995 | 128  | Carsat2 | orange | na |
| chrUn | 76803883 | 76805111 | 1229 | CarSat1 | red    | na |
| chrUn | 76805127 | 76806052 | 926  | CarSat1 | red    | na |
| chrUn | 76806091 | 76808050 | 1960 | CarSat1 | red    | na |
| chrUn | 76808075 | 76809123 | 1049 | CarSat1 | red    | na |
| chrUn | 76819303 | 76821453 | 2151 | SAT1_CF | blue   | na |
| chrUn | 76821466 | 76822312 | 847  | SAT1_CF | blue   | na |
| chrUn | 76822325 | 76823067 | 743  | SAT1_CF | blue   | na |
| chrUn | 76823118 | 76824305 | 1188 | SAT1_CF | blue   | na |
| chrUn | 76824333 | 76825643 | 1311 | SAT1_CF | blue   | na |
| chrUn | 76825675 | 76825772 | 98   | SAT1_CF | blue   | na |
| chrUn | 76825785 | 76826620 | 836  | SAT1_CF | blue   | na |
| chrUn | 76826633 | 76827139 | 507  | SAT1_CF | blue   | na |

|       |          |          |      |         |      |    |
|-------|----------|----------|------|---------|------|----|
| chrUn | 76827219 | 76827464 | 246  | SAT1_CF | blue | na |
| chrUn | 76828518 | 76829228 | 711  | CarSat1 | red  | na |
| chrUn | 76829253 | 76830690 | 1438 | CarSat1 | red  | na |
| chrUn | 76830722 | 76832688 | 1967 | CarSat1 | red  | na |
| chrUn | 76832718 | 76834165 | 1448 | CarSat1 | red  | na |
| chrUn | 76834195 | 76834903 | 709  | CarSat1 | red  | na |
| chrUn | 76834933 | 76836626 | 1694 | CarSat1 | red  | na |
| chrUn | 76837638 | 76838565 | 928  | CarSat1 | red  | na |
| chrUn | 76838590 | 76840048 | 1459 | CarSat1 | red  | na |
| chrUn | 76840064 | 76841640 | 1577 | CarSat1 | red  | na |
| chrUn | 76841654 | 76844920 | 3267 | CarSat1 | red  | na |
| chrUn | 76844936 | 76845783 | 848  | CarSat1 | red  | na |
| chrUn | 76848170 | 76849123 | 954  | CarSat1 | red  | na |
| chrUn | 76849274 | 76850720 | 1447 | CarSat1 | red  | na |
| chrUn | 76850741 | 76851523 | 783  | CarSat1 | red  | na |
| chrUn | 76851587 | 76852493 | 907  | CarSat1 | red  | na |
| chrUn | 76852514 | 76853556 | 1043 | CarSat1 | red  | na |
| chrUn | 76853586 | 76854942 | 1357 | CarSat1 | red  | na |
| chrUn | 76858987 | 76859671 | 685  | CarSat1 | red  | na |
| chrUn | 76859689 | 76860527 | 839  | CarSat1 | red  | na |
| chrUn | 76860738 | 76861330 | 593  | CarSat1 | red  | na |
| chrUn | 76865096 | 76866018 | 923  | CarSat1 | red  | na |
| chrUn | 76866042 | 76866982 | 941  | CarSat1 | red  | na |
| chrUn | 76867012 | 76868236 | 1225 | CarSat1 | red  | na |
| chrUn | 76868260 | 76869194 | 935  | CarSat1 | red  | na |
| chrUn | 76869224 | 76870668 | 1445 | CarSat1 | red  | na |
| chrUn | 76870698 | 76871675 | 978  | CarSat1 | red  | na |
| chrUn | 76871702 | 76872141 | 440  | CarSat1 | red  | na |
| chrUn | 76872171 | 76873212 | 1042 | CarSat1 | red  | na |
| chrUn | 76874300 | 76874614 | 315  | CarSat1 | red  | na |
| chrUn | 76874803 | 76875459 | 657  | CarSat1 | red  | na |
| chrUn | 76875484 | 76876687 | 1204 | CarSat1 | red  | na |
| chrUn | 76876714 | 76877676 | 963  | CarSat1 | red  | na |
| chrUn | 76877701 | 76878413 | 713  | CarSat1 | red  | na |
| chrUn | 76878429 | 76879635 | 1207 | CarSat1 | red  | na |
| chrUn | 76879662 | 76881844 | 2183 | CarSat1 | red  | na |
| chrUn | 76881871 | 76882390 | 520  | CarSat1 | red  | na |
| chrUn | 76883403 | 76883846 | 444  | CarSat1 | red  | na |
| chrUn | 76883862 | 76884582 | 721  | CarSat1 | red  | na |
| chrUn | 76884598 | 76885557 | 960  | CarSat1 | red  | na |
| chrUn | 76885584 | 76886791 | 1208 | CarSat1 | red  | na |
| chrUn | 76886807 | 76887771 | 965  | CarSat1 | red  | na |



|       |          |          |      |         |        |    |
|-------|----------|----------|------|---------|--------|----|
| chrUn | 76887798 | 76888506 | 709  | CarSat1 | red    | na |
| chrUn | 76888533 | 76889243 | 711  | CarSat1 | red    | na |
| chrUn | 76889270 | 76889978 | 709  | CarSat1 | red    | na |
| chrUn | 76890005 | 76890474 | 470  | CarSat1 | red    | na |
| chrUn | 76890490 | 76891453 | 964  | CarSat1 | red    | na |
| chrUn | 76892563 | 76893532 | 970  | CarSat1 | red    | na |
| chrUn | 76893553 | 76894264 | 712  | CarSat1 | red    | na |
| chrUn | 76894290 | 76895745 | 1456 | CarSat1 | red    | na |
| chrUn | 76895766 | 76897686 | 1921 | CarSat1 | red    | na |
| chrUn | 76897713 | 76898423 | 711  | CarSat1 | red    | na |
| chrUn | 76898448 | 76899170 | 723  | CarSat1 | red    | na |
| chrUn | 76899195 | 76900645 | 1451 | CarSat1 | red    | na |
| chrUn | 76919949 | 76920616 | 668  | CarSat1 | red    | na |
| chrUn | 76920650 | 76922086 | 1437 | CarSat1 | red    | na |
| chrUn | 76922120 | 76922821 | 702  | CarSat1 | red    | na |
| chrUn | 76922851 | 76925025 | 2175 | CarSat1 | red    | na |
| chrUn | 76925055 | 76926493 | 1439 | CarSat1 | red    | na |
| chrUn | 76926522 | 76926967 | 446  | CarSat1 | red    | na |
| chrUn | 76926988 | 76928071 | 1084 | CarSat1 | red    | na |
| chrUn | 76947337 | 76948774 | 1438 | CarSat1 | red    | na |
| chrUn | 76948811 | 76950041 | 1231 | CarSat1 | red    | na |
| chrUn | 76950066 | 76950768 | 703  | CarSat1 | red    | na |
| chrUn | 76950802 | 76951504 | 703  | CarSat1 | red    | na |
| chrUn | 76951529 | 76952239 | 711  | CarSat1 | red    | na |
| chrUn | 76952264 | 76953199 | 936  | CarSat1 | red    | na |
| chrUn | 76953214 | 76953340 | 127  | Carsat2 | orange | na |
| chrUn | 76953229 | 76953936 | 708  | CarSat1 | red    | na |
| chrUn | 76953966 | 76954678 | 713  | CarSat1 | red    | na |
| chrUn | 76954692 | 76954818 | 127  | Carsat2 | orange | na |
| chrUn | 76954711 | 76955418 | 708  | CarSat1 | red    | na |
| chrUn | 76956431 | 76956760 | 330  | CarSat1 | red    | na |
| chrUn | 76956944 | 76957744 | 801  | CarSat1 | red    | na |
| chrUn | 76957769 | 76958490 | 722  | CarSat1 | red    | na |
| chrUn | 76958515 | 76960212 | 1698 | CarSat1 | red    | na |
| chrUn | 76960233 | 76960702 | 470  | CarSat1 | red    | na |
| chrUn | 76960727 | 76961430 | 704  | CarSat1 | red    | na |
| chrUn | 76961455 | 76961963 | 509  | CarSat1 | red    | na |
| chrUn | 76961978 | 76963902 | 1925 | CarSat1 | red    | na |
| chrUn | 76963923 | 76964546 | 624  | CarSat1 | red    | na |
| chrUn | 76965558 | 76966322 | 765  | CarSat1 | red    | na |
| chrUn | 76966353 | 76968530 | 2178 | CarSat1 | red    | na |
| chrUn | 76968545 | 76968672 | 128  | Carsat2 | orange | na |

|       |          |          |      |         |        |    |
|-------|----------|----------|------|---------|--------|----|
| chrUn | 76968560 | 76970004 | 1445 | CarSat1 | red    | na |
| chrUn | 76970034 | 76970745 | 712  | CarSat1 | red    | na |
| chrUn | 76970760 | 76970887 | 128  | Carsat2 | orange | na |
| chrUn | 76970775 | 76972219 | 1445 | CarSat1 | red    | na |
| chrUn | 76972234 | 76972360 | 127  | Carsat2 | orange | na |
| chrUn | 76972249 | 76972734 | 486  | CarSat1 | red    | na |
| chrUn | 76972767 | 76973620 | 854  | CarSat1 | red    | na |
| chrUn | 76974659 | 76975117 | 459  | CarSat1 | red    | na |
| chrUn | 76975142 | 76976848 | 1707 | CarSat1 | red    | na |
| chrUn | 76976869 | 76978320 | 1452 | CarSat1 | red    | na |
| chrUn | 76978366 | 76978808 | 443  | CarSat1 | red    | na |
| chrUn | 76978833 | 76979790 | 958  | CarSat1 | red    | na |
| chrUn | 76979815 | 76981016 | 1202 | CarSat1 | red    | na |
| chrUn | 76981041 | 76981752 | 712  | CarSat1 | red    | na |
| chrUn | 76981777 | 76982735 | 959  | CarSat1 | red    | na |
| chrUn | 76992847 | 76994377 | 1531 | CarSat1 | red    | na |
| chrUn | 76994407 | 76995133 | 727  | CarSat1 | red    | na |
| chrUn | 76995148 | 76995870 | 723  | CarSat1 | red    | na |
| chrUn | 76995885 | 76997350 | 1466 | CarSat1 | red    | na |
| chrUn | 76997365 | 76998076 | 712  | CarSat1 | red    | na |
| chrUn | 76998106 | 76999550 | 1445 | CarSat1 | red    | na |
| chrUn | 76999580 | 77000291 | 712  | CarSat1 | red    | na |
| chrUn | 77000321 | 77000899 | 579  | CarSat1 | red    | na |
| chrUn | 77020105 | 77021006 | 902  | CarSat1 | red    | na |
| chrUn | 77021036 | 77021744 | 709  | CarSat1 | red    | na |
| chrUn | 77021774 | 77022259 | 486  | CarSat1 | red    | na |
| chrUn | 77022293 | 77023219 | 927  | CarSat1 | red    | na |
| chrUn | 77023249 | 77023956 | 708  | CarSat1 | red    | na |
| chrUn | 77023986 | 77024694 | 709  | CarSat1 | red    | na |
| chrUn | 77024724 | 77027416 | 2693 | CarSat1 | red    | na |
| chrUn | 77027441 | 77028151 | 711  | CarSat1 | red    | na |
| chrUn | 77038277 | 77040026 | 1750 | CarSat1 | red    | na |
| chrUn | 77040045 | 77040173 | 129  | Carsat2 | orange | na |
| chrUn | 77040060 | 77041774 | 1715 | CarSat1 | red    | na |
| chrUn | 77041795 | 77043708 | 1914 | CarSat1 | red    | na |
| chrUn | 77043737 | 77044710 | 974  | CarSat1 | red    | na |
| chrUn | 77044731 | 77045441 | 711  | CarSat1 | red    | na |
| chrUn | 77045462 | 77046318 | 857  | CarSat1 | red    | na |
| chrUn | 77047329 | 77048618 | 1290 | CarSat1 | red    | na |
| chrUn | 77048645 | 77049355 | 711  | CarSat1 | red    | na |
| chrUn | 77049382 | 77050091 | 710  | CarSat1 | red    | na |
| chrUn | 77050118 | 77050828 | 711  | CarSat1 | red    | na |

|       |          |          |      |         |        |    |
|-------|----------|----------|------|---------|--------|----|
| chrUn | 77050855 | 77053291 | 2437 | CarSat1 | red    | na |
| chrUn | 77053316 | 77055388 | 2073 | CarSat1 | red    | na |
| chrUn | 77065457 | 77068411 | 2955 | CarSat1 | red    | na |
| chrUn | 77068441 | 77069160 | 720  | CarSat1 | red    | na |
| chrUn | 77069175 | 77070634 | 1460 | CarSat1 | red    | na |
| chrUn | 77070649 | 77072110 | 1462 | CarSat1 | red    | na |
| chrUn | 77072126 | 77072849 | 724  | CarSat1 | red    | na |
| chrUn | 77072864 | 77073524 | 661  | CarSat1 | red    | na |
| chrUn | 77074607 | 77075230 | 624  | CarSat1 | red    | na |
| chrUn | 77075331 | 77076314 | 984  | CarSat1 | red    | na |
| chrUn | 77077213 | 77077691 | 479  | SAT1_CF | blue   | na |
| chrUn | 77077712 | 77078356 | 645  | SAT1_CF | blue   | na |
| chrUn | 77078368 | 77078681 | 314  | SAT1_CF | blue   | na |
| chrUn | 77078716 | 77079673 | 958  | CarSat1 | red    | na |
| chrUn | 77081257 | 77082174 | 918  | SAT1_CF | blue   | na |
| chrUn | 77082251 | 77082725 | 475  | SAT1_CF | blue   | na |
| chrUn | 77082746 | 77083361 | 616  | SAT1_CF | blue   | na |
| chrUn | 77083356 | 77084074 | 719  | CarSat1 | red    | na |
| chrUn | 77084092 | 77084521 | 430  | CarSat1 | red    | na |
| chrUn | 77105183 | 77106314 | 1132 | CarSat1 | red    | na |
| chrUn | 77106339 | 77107298 | 960  | CarSat1 | red    | na |
| chrUn | 77107319 | 77108769 | 1451 | CarSat1 | red    | na |
| chrUn | 77108790 | 77109997 | 1208 | CarSat1 | red    | na |
| chrUn | 77110022 | 77110724 | 703  | CarSat1 | red    | na |
| chrUn | 77110749 | 77111473 | 725  | CarSat1 | red    | na |
| chrUn | 77111498 | 77112458 | 961  | CarSat1 | red    | na |
| chrUn | 77112477 | 77113208 | 732  | CarSat1 | red    | na |
| chrUn | 77114280 | 77115072 | 793  | CarSat1 | red    | na |
| chrUn | 77115097 | 77116023 | 927  | CarSat1 | red    | na |
| chrUn | 77116060 | 77117037 | 978  | CarSat1 | red    | na |
| chrUn | 77117058 | 77118234 | 1177 | CarSat1 | red    | na |
| chrUn | 77118271 | 77119312 | 1042 | CarSat1 | red    | na |
| chrUn | 77119333 | 77120237 | 905  | CarSat1 | red    | na |
| chrUn | 77120301 | 77121082 | 782  | CarSat1 | red    | na |
| chrUn | 77121103 | 77122271 | 1169 | CarSat1 | red    | na |
| chrUn | 77123287 | 77124544 | 1258 | CarSat1 | red    | na |
| chrUn | 77124559 | 77124685 | 127  | Carsat2 | orange | na |
| chrUn | 77124574 | 77126023 | 1450 | CarSat1 | red    | na |
| chrUn | 77126053 | 77126759 | 707  | CarSat1 | red    | na |
| chrUn | 77126789 | 77127495 | 707  | CarSat1 | red    | na |
| chrUn | 77127525 | 77129715 | 2191 | CarSat1 | red    | na |
| chrUn | 77129745 | 77130456 | 712  | CarSat1 | red    | na |

|       |          |          |      |         |        |    |
|-------|----------|----------|------|---------|--------|----|
| chrUn | 77130471 | 77130598 | 128  | Carsat2 | orange | na |
| chrUn | 77130486 | 77131312 | 827  | CarSat1 | red    | na |
| chrUn | 77141354 | 77142112 | 759  | CarSat1 | red    | na |
| chrUn | 77142146 | 77142845 | 700  | CarSat1 | red    | na |
| chrUn | 77142879 | 77143580 | 702  | CarSat1 | red    | na |
| chrUn | 77143610 | 77144314 | 705  | CarSat1 | red    | na |
| chrUn | 77144348 | 77145049 | 702  | CarSat1 | red    | na |
| chrUn | 77145083 | 77145520 | 438  | CarSat1 | red    | na |
| chrUn | 77145541 | 77146519 | 979  | CarSat1 | red    | na |
| chrUn | 77146549 | 77147253 | 705  | CarSat1 | red    | na |
| chrUn | 77147283 | 77147988 | 706  | CarSat1 | red    | na |
| chrUn | 77148018 | 77149367 | 1350 | CarSat1 | red    | na |
| chrUn | 77150410 | 77152173 | 1764 | CarSat1 | red    | na |
| chrUn | 77152200 | 77153163 | 964  | CarSat1 | red    | na |
| chrUn | 77153188 | 77153900 | 713  | CarSat1 | red    | na |
| chrUn | 77153925 | 77155590 | 1666 | CarSat1 | red    | na |
| chrUn | 77155620 | 77156851 | 1232 | CarSat1 | red    | na |
| chrUn | 77156876 | 77158420 | 1545 | CarSat1 | red    | na |
| chrUn | 77159428 | 77165133 | 5706 | Carsat2 | orange | na |
| chrUn | 77165349 | 77167459 | 2111 | Carsat2 | orange | na |
| chrUn | 77168486 | 77169206 | 721  | CarSat1 | red    | na |
| chrUn | 77169222 | 77170185 | 964  | CarSat1 | red    | na |
| chrUn | 77170212 | 77170681 | 470  | CarSat1 | red    | na |
| chrUn | 77170697 | 77171659 | 963  | CarSat1 | red    | na |
| chrUn | 77171686 | 77172155 | 470  | CarSat1 | red    | na |
| chrUn | 77172171 | 77173133 | 963  | CarSat1 | red    | na |
| chrUn | 77173160 | 77173871 | 712  | CarSat1 | red    | na |
| chrUn | 77173898 | 77175346 | 1449 | CarSat1 | red    | na |
| chrUn | 77175373 | 77176491 | 1119 | CarSat1 | red    | na |
| chrUn | 77177494 | 77179391 | 1898 | CarSat1 | red    | na |
| chrUn | 77179407 | 77180127 | 721  | CarSat1 | red    | na |
| chrUn | 77180143 | 77181058 | 916  | CarSat1 | red    | na |
| chrUn | 77181098 | 77181591 | 494  | CarSat1 | red    | na |
| chrUn | 77181607 | 77183554 | 1948 | CarSat1 | red    | na |
| chrUn | 77183570 | 77184039 | 470  | CarSat1 | red    | na |
| chrUn | 77184066 | 77185030 | 965  | CarSat1 | red    | na |
| chrUn | 77185055 | 77185500 | 446  | CarSat1 | red    | na |
| chrUn | 77186518 | 77187207 | 690  | CarSat1 | red    | na |
| chrUn | 77187231 | 77190889 | 3659 | CarSat1 | red    | na |
| chrUn | 77190913 | 77193595 | 2683 | CarSat1 | red    | na |
| chrUn | 77193616 | 77194543 | 928  | CarSat1 | red    | na |
| chrUn | 77195547 | 77196207 | 661  | CarSat1 | red    | na |

|       |          |          |      |         |      |    |
|-------|----------|----------|------|---------|------|----|
| chrUn | 77196234 | 77196694 | 461  | CarSat1 | red  | na |
| chrUn | 77196720 | 77201363 | 4644 | CarSat1 | red  | na |
| chrUn | 77201390 | 77202101 | 712  | CarSat1 | red  | na |
| chrUn | 77202128 | 77202838 | 711  | CarSat1 | red  | na |
| chrUn | 77202865 | 77203563 | 699  | CarSat1 | red  | na |
| chrUn | 77204566 | 77204873 | 308  | SAT1_CF | blue | na |
| chrUn | 77204943 | 77205496 | 554  | SAT1_CF | blue | na |
| chrUn | 77205508 | 77206220 | 713  | SAT1_CF | blue | na |
| chrUn | 77206239 | 77206405 | 167  | SAT1_CF | blue | na |
| chrUn | 77206448 | 77207109 | 662  | SAT1_CF | blue | na |
| chrUn | 77207131 | 77208332 | 1202 | SAT1_CF | blue | na |
| chrUn | 77208374 | 77208862 | 489  | SAT1_CF | blue | na |
| chrUn | 77208875 | 77209376 | 502  | SAT1_CF | blue | na |
| chrUn | 77209389 | 77210072 | 684  | SAT1_CF | blue | na |
| chrUn | 77210084 | 77210755 | 672  | SAT1_CF | blue | na |
| chrUn | 77210822 | 77212173 | 1352 | SAT1_CF | blue | na |
| chrUn | 77212206 | 77212289 | 84   | SAT1_CF | blue | na |
| chrUn | 77212313 | 77212583 | 271  | SAT1_CF | blue | na |
| chrUn | 77213591 | 77214733 | 1143 | CarSat1 | red  | na |
| chrUn | 77214749 | 77215954 | 1206 | CarSat1 | red  | na |
| chrUn | 77215981 | 77217679 | 1699 | CarSat1 | red  | na |
| chrUn | 77217704 | 77218416 | 713  | CarSat1 | red  | na |
| chrUn | 77218441 | 77219639 | 1199 | CarSat1 | red  | na |
| chrUn | 77219666 | 77220375 | 710  | CarSat1 | red  | na |
| chrUn | 77220402 | 77221578 | 1177 | CarSat1 | red  | na |
| chrUn | 77222608 | 77223062 | 455  | SAT1_CF | blue | na |
| chrUn | 77223076 | 77223833 | 758  | SAT1_CF | blue | na |
| chrUn | 77223845 | 77223918 | 74   | SAT1_CF | blue | na |
| chrUn | 77223975 | 77224519 | 545  | SAT1_CF | blue | na |
| chrUn | 77224580 | 77225270 | 691  | SAT1_CF | blue | na |
| chrUn | 77225284 | 77227003 | 1720 | SAT1_CF | blue | na |
| chrUn | 77227023 | 77227877 | 855  | SAT1_CF | blue | na |
| chrUn | 77227919 | 77228459 | 541  | SAT1_CF | blue | na |
| chrUn | 77228504 | 77229617 | 1114 | SAT1_CF | blue | na |
| chrUn | 77229799 | 77229933 | 135  | SAT1_CF | blue | na |
| chrUn | 77230001 | 77230597 | 597  | SAT1_CF | blue | na |
| chrUn | 77231655 | 77235039 | 3385 | CarSat1 | red  | na |
| chrUn | 77235066 | 77235777 | 712  | CarSat1 | red  | na |
| chrUn | 77235804 | 77238772 | 2969 | CarSat1 | red  | na |
| chrUn | 77238794 | 77239630 | 837  | CarSat1 | red  | na |
| chrUn | 77240663 | 77242239 | 1577 | SAT1_CF | blue | na |
| chrUn | 77242265 | 77242421 | 157  | SAT1_CF | blue | na |

|       |          |          |              |        |    |
|-------|----------|----------|--------------|--------|----|
| chrUn | 77242436 | 77243067 | 632 SAT1_CF  | blue   | na |
| chrUn | 77243078 | 77243760 | 683 SAT1_CF  | blue   | na |
| chrUn | 77243783 | 77244253 | 471 SAT1_CF  | blue   | na |
| chrUn | 77244314 | 77244494 | 181 SAT1_CF  | blue   | na |
| chrUn | 77244674 | 77244875 | 202 SAT1_CF  | blue   | na |
| chrUn | 77244919 | 77245466 | 548 SAT1_CF  | blue   | na |
| chrUn | 77245510 | 77247464 | 1955 SAT1_CF | blue   | na |
| chrUn | 77247477 | 77247978 | 502 SAT1_CF  | blue   | na |
| chrUn | 77248016 | 77248627 | 612 SAT1_CF  | blue   | na |
| chrUn | 77249715 | 77251163 | 1449 CarSat1 | red    | na |
| chrUn | 77251184 | 77252770 | 1587 CarSat1 | red    | na |
| chrUn | 77252791 | 77254410 | 1620 CarSat1 | red    | na |
| chrUn | 77258658 | 77259358 | 701 CarSat1  | red    | na |
| chrUn | 77259373 | 77259500 | 128 Carsat2  | orange | na |
| chrUn | 77259388 | 77260828 | 1441 CarSat1 | red    | na |
| chrUn | 77260845 | 77260969 | 125 Carsat2  | orange | na |
| chrUn | 77260858 | 77261569 | 712 CarSat1  | red    | na |
| chrUn | 77261599 | 77262093 | 495 CarSat1  | red    | na |
| chrUn | 77262109 | 77263313 | 1205 CarSat1 | red    | na |
| chrUn | 77263334 | 77265034 | 1701 CarSat1 | red    | na |
| chrUn | 77265058 | 77266647 | 1590 CarSat1 | red    | na |
| chrUn | 77267675 | 77269096 | 1422 CarSat1 | red    | na |
| chrUn | 77269111 | 77270288 | 1178 CarSat1 | red    | na |
| chrUn | 77270313 | 77270784 | 472 CarSat1  | red    | na |
| chrUn | 77270800 | 77271521 | 722 CarSat1  | red    | na |
| chrUn | 77271537 | 77275647 | 4111 CarSat1 | red    | na |
| chrUn | 77276952 | 77279054 | 2103 CarSat1 | red    | na |
| chrUn | 77279075 | 77281018 | 1944 CarSat1 | red    | na |
| chrUn | 77281043 | 77282000 | 958 CarSat1  | red    | na |
| chrUn | 77282021 | 77283217 | 1197 CarSat1 | red    | na |
| chrUn | 77283242 | 77283963 | 722 CarSat1  | red    | na |
| chrUn | 77283988 | 77284648 | 661 CarSat1  | red    | na |
| chrUn | 77285654 | 77287309 | 1656 CarSat1 | red    | na |
| chrUn | 77287334 | 77289039 | 1706 CarSat1 | red    | na |
| chrUn | 77289060 | 77289527 | 468 CarSat1  | red    | na |
| chrUn | 77289552 | 77291985 | 2434 CarSat1 | red    | na |
| chrUn | 77292006 | 77293631 | 1626 CarSat1 | red    | na |
| chrUn | 77314026 | 77314953 | 928 CarSat1  | red    | na |
| chrUn | 77314981 | 77316201 | 1221 CarSat1 | red    | na |
| chrUn | 77316226 | 77316948 | 723 CarSat1  | red    | na |
| chrUn | 77316973 | 77319642 | 2670 CarSat1 | red    | na |
| chrUn | 77319669 | 77320377 | 709 CarSat1  | red    | na |

|       |          |          |      |         |        |    |
|-------|----------|----------|------|---------|--------|----|
| chrUn | 77320404 | 77321979 | 1576 | CarSat1 | red    | na |
| chrUn | 77323090 | 77330912 | 7823 | Carsat2 | orange | na |
| chrUn | 77331960 | 77332742 | 783  | CarSat1 | red    | na |
| chrUn | 77332769 | 77333238 | 470  | CarSat1 | red    | na |
| chrUn | 77333263 | 77335956 | 2694 | CarSat1 | red    | na |
| chrUn | 77335986 | 77336425 | 440  | CarSat1 | red    | na |
| chrUn | 77336452 | 77336912 | 461  | CarSat1 | red    | na |
| chrUn | 77336937 | 77337650 | 714  | CarSat1 | red    | na |
| chrUn | 77337684 | 77338926 | 1243 | CarSat1 | red    | na |
| chrUn | 77338940 | 77339924 | 985  | CarSat1 | red    | na |
| chrUn | 77349890 | 77351255 | 1366 | CarSat1 | red    | na |
| chrUn | 77351467 | 77352536 | 1070 | CarSat1 | red    | na |
| chrUn | 77352573 | 77353273 | 701  | CarSat1 | red    | na |
| chrUn | 77353303 | 77353742 | 440  | CarSat1 | red    | na |
| chrUn | 77353769 | 77354973 | 1205 | CarSat1 | red    | na |
| chrUn | 77354998 | 77355701 | 704  | CarSat1 | red    | na |
| chrUn | 77355726 | 77356957 | 1232 | CarSat1 | red    | na |
| chrUn | 77356970 | 77357852 | 883  | CarSat1 | red    | na |
| chrUn | 77358852 | 77359814 | 963  | CarSat1 | red    | na |
| chrUn | 77359841 | 77363498 | 3658 | CarSat1 | red    | na |
| chrUn | 77363525 | 77363965 | 441  | CarSat1 | red    | na |
| chrUn | 77363995 | 77364696 | 702  | CarSat1 | red    | na |
| chrUn | 77364733 | 77366178 | 1446 | CarSat1 | red    | na |
| chrUn | 77366193 | 77366319 | 127  | Carsat2 | orange | na |
| chrUn | 77366208 | 77366809 | 602  | CarSat1 | red    | na |
| chrUn | 77367821 | 77368322 | 502  | CarSat1 | red    | na |
| chrUn | 77368337 | 77369059 | 723  | CarSat1 | red    | na |
| chrUn | 77369074 | 77370410 | 1337 | CarSat1 | red    | na |
| chrUn | 77370506 | 77372342 | 1837 | CarSat1 | red    | na |
| chrUn | 77372374 | 77372875 | 502  | CarSat1 | red    | na |
| chrUn | 77372890 | 77373621 | 732  | CarSat1 | red    | na |
| chrUn | 77373636 | 77374819 | 1184 | CarSat1 | red    | na |
| chrUn | 77374844 | 77375756 | 913  | CarSat1 | red    | na |
| chrUn | 77385725 | 77389093 | 3369 | CarSat1 | red    | na |
| chrUn | 77389108 | 77390033 | 926  | CarSat1 | red    | na |
| chrUn | 77390058 | 77390778 | 721  | CarSat1 | red    | na |
| chrUn | 77390803 | 77391506 | 704  | CarSat1 | red    | na |
| chrUn | 77391531 | 77392024 | 494  | CarSat1 | red    | na |
| chrUn | 77392054 | 77393671 | 1618 | CarSat1 | red    | na |
| chrUn | 77409854 | 77410810 | 957  | CarSat1 | red    | na |
| chrUn | 77410970 | 77412419 | 1450 | CarSat1 | red    | na |
| chrUn | 77412446 | 77413223 | 778  | CarSat1 | red    | na |

|       |          |          |      |         |        |    |
|-------|----------|----------|------|---------|--------|----|
| chrUn | 77413286 | 77414193 | 908  | CarSat1 | red    | na |
| chrUn | 77414214 | 77415255 | 1042 | CarSat1 | red    | na |
| chrUn | 77425195 | 77427462 | 2268 | CarSat1 | red    | na |
| chrUn | 77427477 | 77427604 | 128  | Carsat2 | orange | na |
| chrUn | 77427492 | 77429674 | 2183 | CarSat1 | red    | na |
| chrUn | 77429704 | 77430935 | 1232 | CarSat1 | red    | na |
| chrUn | 77430951 | 77432154 | 1204 | CarSat1 | red    | na |
| chrUn | 77432181 | 77433118 | 938  | CarSat1 | red    | na |
| chrUn | 77452590 | 77456097 | 3508 | CarSat1 | red    | na |
| chrUn | 77456113 | 77457320 | 1208 | CarSat1 | red    | na |
| chrUn | 77457347 | 77458056 | 710  | CarSat1 | red    | na |
| chrUn | 77458084 | 77459047 | 964  | CarSat1 | red    | na |
| chrUn | 77459072 | 77459532 | 461  | CarSat1 | red    | na |
| chrUn | 77459559 | 77460493 | 935  | CarSat1 | red    | na |
| chrUn | 77461500 | 77462959 | 1460 | CarSat1 | red    | na |
| chrUn | 77462974 | 77463680 | 707  | CarSat1 | red    | na |
| chrUn | 77463710 | 77465166 | 1457 | CarSat1 | red    | na |
| chrUn | 77465181 | 77467096 | 1916 | CarSat1 | red    | na |
| chrUn | 77467123 | 77468102 | 980  | CarSat1 | red    | na |
| chrUn | 77468132 | 77469395 | 1264 | CarSat1 | red    | na |
| chrUn | 77470433 | 77470966 | 534  | CarSat1 | red    | na |
| chrUn | 77470991 | 77471954 | 964  | CarSat1 | red    | na |
| chrUn | 77471981 | 77474166 | 2186 | CarSat1 | red    | na |
| chrUn | 77474193 | 77475388 | 1196 | CarSat1 | red    | na |
| chrUn | 77475413 | 77477599 | 2187 | CarSat1 | red    | na |
| chrUn | 77477624 | 77478312 | 689  | CarSat1 | red    | na |
| chrUn | 77495086 | 77496105 | 1020 | Sat2CF  | purple | na |
| chrUn | 77497127 | 77498038 | 912  | CarSat1 | red    | na |
| chrUn | 77498065 | 77499027 | 963  | CarSat1 | red    | na |
| chrUn | 77499043 | 77499512 | 470  | CarSat1 | red    | na |
| chrUn | 77499539 | 77503200 | 3662 | CarSat1 | red    | na |
| chrUn | 77503227 | 77503318 | 92   | CarSat1 | red    | na |
| chrUn | 77503511 | 77504395 | 885  | CarSat1 | red    | na |
| chrUn | 77504411 | 77505011 | 601  | CarSat1 | red    | na |
| chrUn | 77506030 | 77507751 | 1722 | CarSat1 | red    | na |
| chrUn | 77507766 | 77507893 | 128  | Carsat2 | orange | na |
| chrUn | 77507781 | 77509744 | 1964 | CarSat1 | red    | na |
| chrUn | 77509760 | 77512443 | 2684 | CarSat1 | red    | na |
| chrUn | 77512470 | 77513180 | 711  | CarSat1 | red    | na |
| chrUn | 77513207 | 77513887 | 681  | CarSat1 | red    | na |
| chrUn | 77514907 | 77516274 | 1368 | CarSat1 | red    | na |
| chrUn | 77516301 | 77517010 | 710  | CarSat1 | red    | na |



|       |          |          |      |         |        |    |
|-------|----------|----------|------|---------|--------|----|
| chrUn | 77517037 | 77519220 | 2184 | CarSat1 | red    | na |
| chrUn | 77519247 | 77519957 | 711  | CarSat1 | red    | na |
| chrUn | 77519984 | 77520695 | 712  | CarSat1 | red    | na |
| chrUn | 77520722 | 77521929 | 1208 | CarSat1 | red    | na |
| chrUn | 77521945 | 77522791 | 847  | CarSat1 | red    | na |
| chrUn | 77523793 | 77524215 | 423  | Sat54CF | na     | na |
| chrUn | 77524388 | 77525226 | 839  | Sat54CF | na     | na |
| chrUn | 77524431 | 77525133 | 703  | Sat54CF | na     | na |
| chrUn | 77526995 | 77527614 | 620  | Sat54CF | na     | na |
| chrUn | 77532702 | 77533188 | 487  | CarSat1 | red    | na |
| chrUn | 77533218 | 77538355 | 5138 | CarSat1 | red    | na |
| chrUn | 77538385 | 77539341 | 957  | CarSat1 | red    | na |
| chrUn | 77539353 | 77540325 | 973  | CarSat1 | red    | na |
| chrUn | 77541560 | 77541966 | 407  | SAT1_CF | blue   | na |
| chrUn | 77541997 | 77544409 | 2413 | SAT1_CF | blue   | na |
| chrUn | 77544445 | 77544946 | 502  | SAT1_CF | blue   | na |
| chrUn | 77544959 | 77545067 | 109  | SAT1_CF | blue   | na |
| chrUn | 77545086 | 77546326 | 1241 | SAT1_CF | blue   | na |
| chrUn | 77546369 | 77549426 | 3058 | SAT1_CF | blue   | na |
| chrUn | 77550426 | 77552687 | 2262 | CarSat1 | red    | na |
| chrUn | 77552703 | 77553425 | 723  | CarSat1 | red    | na |
| chrUn | 77553441 | 77554897 | 1457 | CarSat1 | red    | na |
| chrUn | 77554913 | 77557351 | 2439 | CarSat1 | red    | na |
| chrUn | 77557378 | 77558292 | 915  | CarSat1 | red    | na |
| chrUn | 77559295 | 77559960 | 666  | CarSat1 | red    | na |
| chrUn | 77559987 | 77560941 | 955  | CarSat1 | red    | na |
| chrUn | 77560966 | 77561686 | 721  | CarSat1 | red    | na |
| chrUn | 77561702 | 77562909 | 1208 | CarSat1 | red    | na |
| chrUn | 77562936 | 77565852 | 2917 | CarSat1 | red    | na |
| chrUn | 77565879 | 77566586 | 708  | CarSat1 | red    | na |
| chrUn | 77566613 | 77567160 | 548  | CarSat1 | red    | na |
| chrUn | 77568192 | 77570050 | 1859 | CarSat1 | red    | na |
| chrUn | 77570080 | 77571528 | 1449 | CarSat1 | red    | na |
| chrUn | 77571558 | 77572782 | 1225 | CarSat1 | red    | na |
| chrUn | 77572806 | 77573519 | 714  | CarSat1 | red    | na |
| chrUn | 77573543 | 77575218 | 1676 | CarSat1 | red    | na |
| chrUn | 77575234 | 77575358 | 125  | Carsat2 | orange | na |
| chrUn | 77575248 | 77576024 | 777  | CarSat1 | red    | na |
| chrUn | 77577024 | 77578598 | 1575 | CarSat1 | red    | na |
| chrUn | 77578628 | 77580809 | 2182 | CarSat1 | red    | na |
| chrUn | 77580839 | 77582282 | 1444 | CarSat1 | red    | na |
| chrUn | 77582312 | 77583024 | 713  | CarSat1 | red    | na |

|       |          |          |      |         |        |    |
|-------|----------|----------|------|---------|--------|----|
| chrUn | 77583054 | 77583761 | 708  | CarSat1 | red    | na |
| chrUn | 77583792 | 77584859 | 1068 | CarSat1 | red    | na |
| chrUn | 77603645 | 77604490 | 846  | CarSat1 | red    | na |
| chrUn | 77604511 | 77605479 | 969  | CarSat1 | red    | na |
| chrUn | 77605504 | 77606699 | 1196 | CarSat1 | red    | na |
| chrUn | 77606720 | 77607904 | 1185 | CarSat1 | red    | na |
| chrUn | 77607934 | 77609376 | 1443 | CarSat1 | red    | na |
| chrUn | 77609406 | 77610624 | 1219 | CarSat1 | red    | na |
| chrUn | 77610649 | 77611451 | 803  | CarSat1 | red    | na |
| chrUn | 77612462 | 77614072 | 1611 | CarSat1 | red    | na |
| chrUn | 77614099 | 77614808 | 710  | CarSat1 | red    | na |
| chrUn | 77614835 | 77616030 | 1196 | CarSat1 | red    | na |
| chrUn | 77616056 | 77616777 | 722  | CarSat1 | red    | na |
| chrUn | 77616807 | 77617286 | 480  | CarSat1 | red    | na |
| chrUn | 77617326 | 77619209 | 1884 | CarSat1 | red    | na |
| chrUn | 77619240 | 77620299 | 1060 | CarSat1 | red    | na |
| chrUn | 77621302 | 77622609 | 1308 | CarSat1 | red    | na |
| chrUn | 77622624 | 77622751 | 128  | Carsat2 | orange | na |
| chrUn | 77622639 | 77623125 | 487  | CarSat1 | red    | na |
| chrUn | 77623158 | 77624419 | 1262 | CarSat1 | red    | na |
| chrUn | 77624440 | 77625705 | 1266 | CarSat1 | red    | na |
| chrUn | 77625720 | 77625847 | 128  | Carsat2 | orange | na |
| chrUn | 77625735 | 77627915 | 2181 | CarSat1 | red    | na |
| chrUn | 77627930 | 77628044 | 115  | Carsat2 | orange | na |
| chrUn | 77627945 | 77629146 | 1202 | CarSat1 | red    | na |
| chrUn | 77639068 | 77643465 | 4398 | CarSat1 | red    | na |
| chrUn | 77643492 | 77644442 | 951  | CarSat1 | red    | na |
| chrUn | 77644467 | 77645175 | 709  | CarSat1 | red    | na |
| chrUn | 77645200 | 77646830 | 1631 | CarSat1 | red    | na |
| chrUn | 77647830 | 77648999 | 1170 | CarSat1 | red    | na |
| chrUn | 77649026 | 77649494 | 469  | CarSat1 | red    | na |
| chrUn | 77649519 | 77650222 | 704  | CarSat1 | red    | na |
| chrUn | 77650247 | 77651945 | 1699 | CarSat1 | red    | na |
| chrUn | 77651972 | 77652681 | 710  | CarSat1 | red    | na |
| chrUn | 77652708 | 77654153 | 1446 | CarSat1 | red    | na |
| chrUn | 77654180 | 77655622 | 1443 | CarSat1 | red    | na |
| chrUn | 77679967 | 77680655 | 689  | CarSat1 | red    | na |
| chrUn | 77680670 | 77681391 | 722  | CarSat1 | red    | na |
| chrUn | 77681406 | 77682131 | 726  | CarSat1 | red    | na |
| chrUn | 77682146 | 77682867 | 722  | CarSat1 | red    | na |
| chrUn | 77682882 | 77683590 | 709  | CarSat1 | red    | na |
| chrUn | 77683620 | 77684342 | 723  | CarSat1 | red    | na |

|       |          |          |      |         |     |    |
|-------|----------|----------|------|---------|-----|----|
| chrUn | 77684357 | 77685079 | 723  | CarSat1 | red | na |
| chrUn | 77685094 | 77685805 | 712  | CarSat1 | red | na |
| chrUn | 77685835 | 77686543 | 709  | CarSat1 | red | na |
| chrUn | 77686573 | 77687280 | 708  | CarSat1 | red | na |
| chrUn | 77687310 | 77687787 | 478  | CarSat1 | red | na |
| chrUn | 77688818 | 77690885 | 2068 | CarSat1 | red | na |
| chrUn | 77690906 | 77691622 | 717  | CarSat1 | red | na |
| chrUn | 77691643 | 77693578 | 1936 | CarSat1 | red | na |
| chrUn | 77693603 | 77695311 | 1709 | CarSat1 | red | na |
| chrUn | 77695358 | 77696587 | 1230 | CarSat1 | red | na |
| chrUn | 77710974 | 77711034 | 61   | HSATII  | na  | na |
| chrUn | 77715287 | 77716430 | 1144 | CarSat1 | red | na |
| chrUn | 77716451 | 77716911 | 461  | CarSat1 | red | na |
| chrUn | 77716950 | 77718184 | 1235 | CarSat1 | red | na |
| chrUn | 77718199 | 77719130 | 932  | CarSat1 | red | na |
| chrUn | 77719155 | 77720377 | 1223 | CarSat1 | red | na |
| chrUn | 77720407 | 77721129 | 723  | CarSat1 | red | na |
| chrUn | 77721144 | 77723069 | 1926 | CarSat1 | red | na |
| chrUn | 77741722 | 77743112 | 1391 | CarSat1 | red | na |
| chrUn | 77743139 | 77747295 | 4157 | CarSat1 | red | na |
| chrUn | 77747321 | 77748273 | 953  | CarSat1 | red | na |
| chrUn | 77748300 | 77749529 | 1230 | CarSat1 | red | na |
| chrUn | 77750536 | 77752963 | 2428 | CarSat1 | red | na |
| chrUn | 77752990 | 77753702 | 713  | CarSat1 | red | na |
| chrUn | 77753729 | 77754707 | 979  | CarSat1 | red | na |
| chrUn | 77754739 | 77757147 | 2409 | CarSat1 | red | na |
| chrUn | 77757165 | 77758317 | 1153 | CarSat1 | red | na |
| chrUn | 77759357 | 77760815 | 1459 | CarSat1 | red | na |
| chrUn | 77760831 | 77761300 | 470  | CarSat1 | red | na |
| chrUn | 77761331 | 77762038 | 708  | CarSat1 | red | na |
| chrUn | 77762065 | 77763027 | 963  | CarSat1 | red | na |
| chrUn | 77763043 | 77763764 | 722  | CarSat1 | red | na |
| chrUn | 77763780 | 77764715 | 936  | CarSat1 | red | na |
| chrUn | 77764745 | 77765975 | 1231 | CarSat1 | red | na |
| chrUn | 77765991 | 77766712 | 722  | CarSat1 | red | na |
| chrUn | 77766728 | 77767138 | 411  | CarSat1 | red | na |
| chrUn | 77768146 | 77768728 | 583  | CarSat1 | red | na |
| chrUn | 77768753 | 77769463 | 711  | CarSat1 | red | na |
| chrUn | 77769488 | 77770201 | 714  | CarSat1 | red | na |
| chrUn | 77770226 | 77771931 | 1706 | CarSat1 | red | na |
| chrUn | 77771952 | 77772933 | 982  | CarSat1 | red | na |
| chrUn | 77772963 | 77773899 | 937  | CarSat1 | red | na |

|       |          |          |      |         |        |    |
|-------|----------|----------|------|---------|--------|----|
| chrUn | 77773915 | 77775372 | 1458 | CarSat1 | red    | na |
| chrUn | 77775388 | 77775881 | 494  | CarSat1 | red    | na |
| chrUn | 77785750 | 77788037 | 2288 | CarSat1 | red    | na |
| chrUn | 77788071 | 77789048 | 978  | CarSat1 | red    | na |
| chrUn | 77789069 | 77789510 | 442  | CarSat1 | red    | na |
| chrUn | 77789539 | 77791709 | 2171 | CarSat1 | red    | na |
| chrUn | 77791739 | 77792443 | 705  | CarSat1 | red    | na |
| chrUn | 77792473 | 77793506 | 1034 | CarSat1 | red    | na |
| chrUn | 77794571 | 77796751 | 2181 | CarSat1 | red    | na |
| chrUn | 77796781 | 77798225 | 1445 | CarSat1 | red    | na |
| chrUn | 77798255 | 77799703 | 1449 | CarSat1 | red    | na |
| chrUn | 77799718 | 77799845 | 128  | Carsat2 | orange | na |
| chrUn | 77799733 | 77800712 | 980  | CarSat1 | red    | na |
| chrUn | 77800739 | 77801178 | 440  | CarSat1 | red    | na |
| chrUn | 77801208 | 77802338 | 1131 | CarSat1 | red    | na |
| chrUn | 77803345 | 77803814 | 470  | SAT1_CF | blue   | na |
| chrUn | 77803858 | 77805033 | 1176 | SAT1_CF | blue   | na |
| chrUn | 77805059 | 77805216 | 158  | SAT1_CF | blue   | na |
| chrUn | 77805231 | 77805755 | 525  | SAT1_CF | blue   | na |
| chrUn | 77805835 | 77806399 | 565  | SAT1_CF | blue   | na |
| chrUn | 77806427 | 77807054 | 628  | SAT1_CF | blue   | na |
| chrUn | 77807099 | 77807774 | 676  | SAT1_CF | blue   | na |
| chrUn | 77807786 | 77808469 | 684  | SAT1_CF | blue   | na |
| chrUn | 77808481 | 77809981 | 1501 | SAT1_CF | blue   | na |
| chrUn | 77810060 | 77811128 | 1069 | SAT1_CF | blue   | na |
| chrUn | 77812135 | 77812848 | 714  | CarSat1 | red    | na |
| chrUn | 77812863 | 77814045 | 1183 | CarSat1 | red    | na |
| chrUn | 77814067 | 77814776 | 710  | CarSat1 | red    | na |
| chrUn | 77814803 | 77816745 | 1943 | CarSat1 | red    | na |
| chrUn | 77816761 | 77817267 | 507  | CarSat1 | red    | na |
| chrUn | 77817282 | 77817992 | 711  | CarSat1 | red    | na |
| chrUn | 77818022 | 77819926 | 1905 | CarSat1 | red    | na |
| chrUn | 77820985 | 77821425 | 441  | CarSat1 | red    | na |
| chrUn | 77821455 | 77822901 | 1447 | CarSat1 | red    | na |
| chrUn | 77822931 | 77824379 | 1449 | CarSat1 | red    | na |
| chrUn | 77824409 | 77825117 | 709  | CarSat1 | red    | na |
| chrUn | 77825147 | 77826377 | 1231 | CarSat1 | red    | na |
| chrUn | 77826393 | 77827328 | 936  | CarSat1 | red    | na |
| chrUn | 77827358 | 77828712 | 1355 | CarSat1 | red    | na |
| chrUn | 77829712 | 77830781 | 1070 | CarSat1 | red    | na |
| chrUn | 77830808 | 77831518 | 711  | CarSat1 | red    | na |
| chrUn | 77831545 | 77832256 | 712  | CarSat1 | red    | na |

|       |          |          |      |         |        |    |
|-------|----------|----------|------|---------|--------|----|
| chrUn | 77832283 | 77833450 | 1168 | CarSat1 | red    | na |
| chrUn | 77833486 | 77834465 | 980  | CarSat1 | red    | na |
| chrUn | 77834492 | 77835663 | 1172 | CarSat1 | red    | na |
| chrUn | 77835678 | 77835804 | 127  | Carsat2 | orange | na |
| chrUn | 77835695 | 77836671 | 977  | CarSat1 | red    | na |
| chrUn | 77836698 | 77837492 | 795  | CarSat1 | red    | na |
| chrUn | 77838495 | 77839547 | 1053 | CarSat1 | red    | na |
| chrUn | 77839574 | 77840285 | 712  | CarSat1 | red    | na |
| chrUn | 77840312 | 77841760 | 1449 | CarSat1 | red    | na |
| chrUn | 77841787 | 77842747 | 961  | CarSat1 | red    | na |
| chrUn | 77842763 | 77843486 | 724  | CarSat1 | red    | na |
| chrUn | 77843502 | 77845167 | 1666 | CarSat1 | red    | na |
| chrUn | 77845205 | 77846272 | 1068 | CarSat1 | red    | na |
| chrUn | 77847277 | 77849883 | 2607 | CarSat1 | red    | na |
| chrUn | 77849910 | 77850621 | 712  | CarSat1 | red    | na |
| chrUn | 77850648 | 77853570 | 2923 | CarSat1 | red    | na |
| chrUn | 77853595 | 77855044 | 1450 | CarSat1 | red    | na |
| chrUn | 77856092 | 77857373 | 1282 | CarSat1 | red    | na |
| chrUn | 77857394 | 77858575 | 1182 | CarSat1 | red    | na |
| chrUn | 77858605 | 77859312 | 708  | CarSat1 | red    | na |
| chrUn | 77859342 | 77860786 | 1445 | CarSat1 | red    | na |
| chrUn | 77860801 | 77860928 | 128  | Carsat2 | orange | na |
| chrUn | 77860816 | 77862262 | 1447 | CarSat1 | red    | na |
| chrUn | 77862292 | 77863812 | 1521 | CarSat1 | red    | na |
| chrUn | 77873584 | 77875125 | 1542 | CarSat1 | red    | na |
| chrUn | 77875155 | 77876133 | 979  | CarSat1 | red    | na |
| chrUn | 77876160 | 77877610 | 1451 | CarSat1 | red    | na |
| chrUn | 77877637 | 77878347 | 711  | CarSat1 | red    | na |
| chrUn | 77878374 | 77880063 | 1690 | CarSat1 | red    | na |
| chrUn | 77880088 | 77881342 | 1255 | CarSat1 | red    | na |
| chrUn | 77891115 | 77892050 | 936  | CarSat1 | red    | na |
| chrUn | 77892084 | 77892784 | 701  | CarSat1 | red    | na |
| chrUn | 77892815 | 77894251 | 1437 | CarSat1 | red    | na |
| chrUn | 77894285 | 77895720 | 1436 | CarSat1 | red    | na |
| chrUn | 77895750 | 77897190 | 1441 | CarSat1 | red    | na |
| chrUn | 77897226 | 77897924 | 699  | CarSat1 | red    | na |
| chrUn | 77897954 | 77898848 | 895  | CarSat1 | red    | na |
| chrUn | 77908640 | 77909267 | 628  | CarSat1 | red    | na |
| chrUn | 77909292 | 77910261 | 970  | CarSat1 | red    | na |
| chrUn | 77910282 | 77910997 | 716  | CarSat1 | red    | na |
| chrUn | 77911018 | 77914437 | 3420 | CarSat1 | red    | na |
| chrUn | 77914453 | 77915683 | 1231 | CarSat1 | red    | na |

|       |          |          |      |         |     |    |
|-------|----------|----------|------|---------|-----|----|
| chrUn | 77915713 | 77916353 | 641  | CarSat1 | red | na |
| chrUn | 77917398 | 77919021 | 1624 | CarSat1 | red | na |
| chrUn | 77919046 | 77920492 | 1447 | CarSat1 | red | na |
| chrUn | 77920517 | 77920977 | 461  | CarSat1 | red | na |
| chrUn | 77920998 | 77922179 | 1182 | CarSat1 | red | na |
| chrUn | 77922209 | 77922912 | 704  | CarSat1 | red | na |
| chrUn | 77922942 | 77924168 | 1227 | CarSat1 | red | na |
| chrUn | 77924193 | 77925110 | 918  | CarSat1 | red | na |
| chrUn | 77926114 | 77927991 | 1878 | CarSat1 | red | na |
| chrUn | 77928007 | 77929213 | 1207 | CarSat1 | red | na |
| chrUn | 77929240 | 77929948 | 709  | CarSat1 | red | na |
| chrUn | 77929975 | 77930685 | 711  | CarSat1 | red | na |
| chrUn | 77930712 | 77931423 | 712  | CarSat1 | red | na |
| chrUn | 77931450 | 77932898 | 1449 | CarSat1 | red | na |
| chrUn | 77932925 | 77933845 | 921  | CarSat1 | red | na |
| chrUn | 77935109 | 77935989 | 881  | CarSat1 | red | na |
| chrUn | 77936016 | 77936725 | 710  | CarSat1 | red | na |
| chrUn | 77936752 | 77937463 | 712  | CarSat1 | red | na |
| chrUn | 77937490 | 77938198 | 709  | CarSat1 | red | na |
| chrUn | 77938228 | 77938940 | 713  | CarSat1 | red | na |
| chrUn | 77938967 | 77939677 | 711  | CarSat1 | red | na |
| chrUn | 77939704 | 77941405 | 1702 | CarSat1 | red | na |
| chrUn | 77941421 | 77942582 | 1162 | CarSat1 | red | na |
| chrUn | 77943631 | 77946230 | 2600 | CarSat1 | red | na |
| chrUn | 77946254 | 77948203 | 1950 | CarSat1 | red | na |
| chrUn | 77948224 | 77950415 | 2192 | CarSat1 | red | na |
| chrUn | 77950436 | 77951153 | 718  | CarSat1 | red | na |
| chrUn | 77952341 | 77954417 | 2077 | CarSat1 | red | na |
| chrUn | 77954433 | 77955154 | 722  | CarSat1 | red | na |
| chrUn | 77955170 | 77956133 | 964  | CarSat1 | red | na |
| chrUn | 77956160 | 77957607 | 1448 | CarSat1 | red | na |
| chrUn | 77957634 | 77960058 | 2425 | CarSat1 | red | na |
| chrUn | 77969800 | 77971003 | 1204 | CarSat1 | red | na |
| chrUn | 77971023 | 77973927 | 2905 | CarSat1 | red | na |
| chrUn | 77973957 | 77975417 | 1461 | CarSat1 | red | na |
| chrUn | 77975432 | 77977531 | 2100 | CarSat1 | red | na |
| chrUn | 77978532 | 77979501 | 970  | CarSat1 | red | na |
| chrUn | 77979522 | 77980238 | 717  | CarSat1 | red | na |
| chrUn | 77980265 | 77980975 | 711  | CarSat1 | red | na |
| chrUn | 77981002 | 77981708 | 707  | CarSat1 | red | na |
| chrUn | 77981739 | 77982692 | 954  | CarSat1 | red | na |
| chrUn | 77982718 | 77983430 | 713  | CarSat1 | red | na |

|       |          |          |      |         |        |    |
|-------|----------|----------|------|---------|--------|----|
| chrUn | 77983455 | 77984175 | 721  | CarSat1 | red    | na |
| chrUn | 77984202 | 77984662 | 461  | CarSat1 | red    | na |
| chrUn | 77984689 | 77985399 | 711  | CarSat1 | red    | na |
| chrUn | 77985419 | 77986257 | 839  | CarSat1 | red    | na |
| chrUn | 77995989 | 77997965 | 1977 | CarSat1 | red    | na |
| chrUn | 77997986 | 77999159 | 1174 | CarSat1 | red    | na |
| chrUn | 77999181 | 77999307 | 127  | Carsat2 | orange | na |
| chrUn | 77999196 | 78000910 | 1715 | CarSat1 | red    | na |
| chrUn | 78000937 | 78003711 | 2775 | CarSat1 | red    | na |
| chrUn | 78004769 | 78006081 | 1313 | CarSat1 | red    | na |
| chrUn | 78006096 | 78006223 | 128  | Carsat2 | orange | na |
| chrUn | 78006111 | 78007089 | 979  | CarSat1 | red    | na |
| chrUn | 78007110 | 78008563 | 1454 | CarSat1 | red    | na |
| chrUn | 78008590 | 78009301 | 712  | CarSat1 | red    | na |
| chrUn | 78009328 | 78010039 | 712  | CarSat1 | red    | na |
| chrUn | 78010066 | 78010776 | 711  | CarSat1 | red    | na |
| chrUn | 78010803 | 78011241 | 439  | CarSat1 | red    | na |
| chrUn | 78011256 | 78011382 | 127  | Carsat2 | orange | na |
| chrUn | 78011271 | 78012415 | 1145 | CarSat1 | red    | na |
| chrUn | 78022166 | 78022486 | 321  | SAT1_CF | blue   | na |
| chrUn | 78022528 | 78024662 | 2135 | SAT1_CF | blue   | na |
| chrUn | 78024675 | 78025903 | 1229 | SAT1_CF | blue   | na |
| chrUn | 78025945 | 78026259 | 315  | SAT1_CF | blue   | na |
| chrUn | 78026264 | 78027448 | 1185 | CarSat1 | red    | na |
| chrUn | 78027463 | 78028981 | 1519 | CarSat1 | red    | na |
| chrUn | 78029000 | 78029524 | 525  | CarSat1 | red    | na |
| chrUn | 78030888 | 78031943 | 1056 | CarSat1 | red    | na |
| chrUn | 78031975 | 78033174 | 1200 | CarSat1 | red    | na |
| chrUn | 78033199 | 78034886 | 1688 | CarSat1 | red    | na |
| chrUn | 78034913 | 78035382 | 470  | CarSat1 | red    | na |
| chrUn | 78035398 | 78036360 | 963  | CarSat1 | red    | na |
| chrUn | 78036387 | 78036855 | 469  | CarSat1 | red    | na |
| chrUn | 78036871 | 78038566 | 1696 | CarSat1 | red    | na |
| chrUn | 78039602 | 78040431 | 830  | CarSat1 | red    | na |
| chrUn | 78040456 | 78041176 | 721  | CarSat1 | red    | na |
| chrUn | 78041201 | 78043871 | 2671 | CarSat1 | red    | na |
| chrUn | 78043898 | 78046321 | 2424 | CarSat1 | red    | na |
| chrUn | 78046346 | 78047316 | 971  | CarSat1 | red    | na |
| chrUn | 78057036 | 78057815 | 780  | CarSat1 | red    | na |
| chrUn | 78057840 | 78059286 | 1447 | CarSat1 | red    | na |
| chrUn | 78059311 | 78061487 | 2177 | CarSat1 | red    | na |
| chrUn | 78061512 | 78062223 | 712  | CarSat1 | red    | na |

|       |          |          |      |         |     |    |
|-------|----------|----------|------|---------|-----|----|
| chrUn | 78062256 | 78063696 | 1441 | CarSat1 | red | na |
| chrUn | 78063721 | 78064701 | 981  | CarSat1 | red | na |
| chrUn | 78065742 | 78066861 | 1120 | CarSat1 | red | na |
| chrUn | 78066886 | 78067846 | 961  | CarSat1 | red | na |
| chrUn | 78067867 | 78070540 | 2674 | CarSat1 | red | na |
| chrUn | 78070565 | 78071071 | 507  | CarSat1 | red | na |
| chrUn | 78071086 | 78073449 | 2364 | CarSat1 | red | na |
| chrUn | 78083156 | 78084466 | 1311 | CarSat1 | red | na |
| chrUn | 78084482 | 78085202 | 721  | CarSat1 | red | na |
| chrUn | 78085216 | 78085731 | 516  | CarSat1 | red | na |
| chrUn | 78085758 | 78087438 | 1681 | CarSat1 | red | na |
| chrUn | 78087468 | 78088447 | 980  | CarSat1 | red | na |
| chrUn | 78088474 | 78089652 | 1179 | CarSat1 | red | na |
| chrUn | 78089682 | 78090842 | 1161 | CarSat1 | red | na |
| chrUn | 78091873 | 78093333 | 1461 | CarSat1 | red | na |
| chrUn | 78093348 | 78095548 | 2201 | CarSat1 | red | na |
| chrUn | 78095563 | 78096284 | 722  | CarSat1 | red | na |
| chrUn | 78096299 | 78098503 | 2205 | CarSat1 | red | na |
| chrUn | 78098518 | 78099519 | 1002 | CarSat1 | red | na |
| chrUn | 78100562 | 78101115 | 554  | CarSat1 | red | na |
| chrUn | 78101142 | 78102579 | 1438 | CarSat1 | red | na |
| chrUn | 78102616 | 78103325 | 710  | CarSat1 | red | na |
| chrUn | 78103352 | 78104559 | 1208 | CarSat1 | red | na |
| chrUn | 78104575 | 78105285 | 711  | CarSat1 | red | na |
| chrUn | 78105310 | 78107008 | 1699 | CarSat1 | red | na |
| chrUn | 78107035 | 78108231 | 1197 | CarSat1 | red | na |
| chrUn | 78109256 | 78112481 | 3226 | CarSat1 | red | na |
| chrUn | 78112497 | 78113460 | 964  | CarSat1 | red | na |
| chrUn | 78113487 | 78114935 | 1449 | CarSat1 | red | na |
| chrUn | 78114962 | 78115672 | 711  | CarSat1 | red | na |
| chrUn | 78115699 | 78116168 | 470  | CarSat1 | red | na |
| chrUn | 78116184 | 78116944 | 761  | CarSat1 | red | na |
| chrUn | 78117947 | 78118628 | 682  | CarSat1 | red | na |
| chrUn | 78118644 | 78119607 | 964  | CarSat1 | red | na |
| chrUn | 78119634 | 78121818 | 2185 | CarSat1 | red | na |
| chrUn | 78121845 | 78123047 | 1203 | CarSat1 | red | na |
| chrUn | 78123065 | 78125626 | 2562 | CarSat1 | red | na |
| chrUn | 78126631 | 78127582 | 952  | CarSat1 | red | na |
| chrUn | 78127612 | 78130529 | 2918 | CarSat1 | red | na |
| chrUn | 78130559 | 78131281 | 723  | CarSat1 | red | na |
| chrUn | 78131296 | 78133706 | 2411 | CarSat1 | red | na |
| chrUn | 78133730 | 78134314 | 585  | CarSat1 | red | na |



|       |          |          |      |         |     |    |
|-------|----------|----------|------|---------|-----|----|
| chrUn | 78135318 | 78136161 | 844  | CarSat1 | red | na |
| chrUn | 78136188 | 78136894 | 707  | CarSat1 | red | na |
| chrUn | 78136934 | 78140096 | 3163 | CarSat1 | red | na |
| chrUn | 78140132 | 78140831 | 700  | CarSat1 | red | na |
| chrUn | 78140847 | 78142052 | 1206 | CarSat1 | red | na |
| chrUn | 78142079 | 78142958 | 880  | CarSat1 | red | na |
| chrUn | 78149956 | 78151682 | 1727 | CarSat1 | red | na |
| chrUn | 78152682 | 78153565 | 884  | CarSat1 | red | na |
| chrUn | 78153581 | 78154542 | 962  | CarSat1 | red | na |
| chrUn | 78154569 | 78156753 | 2185 | CarSat1 | red | na |
| chrUn | 78156780 | 78157987 | 1208 | CarSat1 | red | na |
| chrUn | 78158003 | 78158964 | 962  | CarSat1 | red | na |
| chrUn | 78158991 | 78160358 | 1368 | CarSat1 | red | na |
| chrUn | 78161387 | 78163564 | 2178 | CarSat1 | red | na |
| chrUn | 78163591 | 78164302 | 712  | CarSat1 | red | na |
| chrUn | 78164329 | 78165039 | 711  | CarSat1 | red | na |
| chrUn | 78165066 | 78166515 | 1450 | CarSat1 | red | na |
| chrUn | 78166542 | 78167251 | 710  | CarSat1 | red | na |
| chrUn | 78167278 | 78167988 | 711  | CarSat1 | red | na |
| chrUn | 78168015 | 78168993 | 979  | CarSat1 | red | na |
| chrUn | 78170076 | 78171522 | 1447 | CarSat1 | red | na |
| chrUn | 78171549 | 78172258 | 710  | CarSat1 | red | na |
| chrUn | 78172285 | 78174202 | 1918 | CarSat1 | red | na |
| chrUn | 78174232 | 78175210 | 979  | CarSat1 | red | na |
| chrUn | 78175237 | 78175947 | 711  | CarSat1 | red | na |
| chrUn | 78175974 | 78177153 | 1180 | CarSat1 | red | na |
| chrUn | 78177183 | 78177669 | 487  | CarSat1 | red | na |
| chrUn | 78178686 | 78180043 | 1358 | CarSat1 | red | na |
| chrUn | 78180073 | 78181302 | 1230 | CarSat1 | red | na |
| chrUn | 78181318 | 78183512 | 2195 | CarSat1 | red | na |
| chrUn | 78183528 | 78185203 | 1676 | CarSat1 | red | na |
| chrUn | 78185233 | 78186334 | 1102 | CarSat1 | red | na |
| chrUn | 78187359 | 78188589 | 1231 | CarSat1 | red | na |
| chrUn | 78188605 | 78189074 | 470  | CarSat1 | red | na |
| chrUn | 78189101 | 78190063 | 963  | CarSat1 | red | na |
| chrUn | 78190079 | 78190800 | 722  | CarSat1 | red | na |
| chrUn | 78190816 | 78191528 | 713  | CarSat1 | red | na |
| chrUn | 78191554 | 78194235 | 2682 | CarSat1 | red | na |
| chrUn | 78194262 | 78194899 | 638  | CarSat1 | red | na |
| chrUn | 78196082 | 78197620 | 1539 | CarSat1 | red | na |
| chrUn | 78197645 | 78201541 | 3897 | CarSat1 | red | na |
| chrUn | 78201568 | 78202275 | 708  | CarSat1 | red | na |

|       |          |          |      |         |        |    |
|-------|----------|----------|------|---------|--------|----|
| chrUn | 78202302 | 78203631 | 1330 | CarSat1 | red    | na |
| chrUn | 78204634 | 78207412 | 2779 | CarSat1 | red    | na |
| chrUn | 78207427 | 78208148 | 722  | CarSat1 | red    | na |
| chrUn | 78208163 | 78209089 | 927  | CarSat1 | red    | na |
| chrUn | 78209122 | 78212276 | 3155 | CarSat1 | red    | na |
| chrUn | 78213309 | 78220134 | 6826 | CarSat1 | red    | na |
| chrUn | 78220159 | 78220923 | 765  | CarSat1 | red    | na |
| chrUn | 78230569 | 78235842 | 5274 | CarSat1 | red    | na |
| chrUn | 78235872 | 78238203 | 2332 | CarSat1 | red    | na |
| chrUn | 78239206 | 78239297 | 92   | Carsat2 | orange | na |
| chrUn | 78239216 | 78240110 | 895  | CarSat1 | red    | na |
| chrUn | 78240126 | 78240594 | 469  | CarSat1 | red    | na |
| chrUn | 78240621 | 78241328 | 708  | CarSat1 | red    | na |
| chrUn | 78241355 | 78242801 | 1447 | CarSat1 | red    | na |
| chrUn | 78242828 | 78243539 | 712  | CarSat1 | red    | na |
| chrUn | 78243566 | 78244274 | 709  | CarSat1 | red    | na |
| chrUn | 78244301 | 78245262 | 962  | CarSat1 | red    | na |
| chrUn | 78245287 | 78245998 | 712  | CarSat1 | red    | na |
| chrUn | 78246014 | 78246844 | 831  | CarSat1 | red    | na |
| chrUn | 78247884 | 78248861 | 978  | CarSat1 | red    | na |
| chrUn | 78248888 | 78249849 | 962  | CarSat1 | red    | na |
| chrUn | 78249865 | 78250584 | 720  | CarSat1 | red    | na |
| chrUn | 78250600 | 78251536 | 937  | CarSat1 | red    | na |
| chrUn | 78251551 | 78251678 | 128  | Carsat2 | orange | na |
| chrUn | 78251566 | 78253531 | 1966 | CarSat1 | red    | na |
| chrUn | 78253547 | 78254753 | 1207 | CarSat1 | red    | na |
| chrUn | 78254780 | 78255455 | 676  | CarSat1 | red    | na |
| chrUn | 78256483 | 78257120 | 638  | CarSat1 | red    | na |
| chrUn | 78257150 | 78258599 | 1450 | CarSat1 | red    | na |
| chrUn | 78258614 | 78258741 | 128  | Carsat2 | orange | na |
| chrUn | 78258629 | 78260069 | 1441 | CarSat1 | red    | na |
| chrUn | 78260084 | 78260210 | 127  | Carsat2 | orange | na |
| chrUn | 78260099 | 78261077 | 979  | CarSat1 | red    | na |
| chrUn | 78261104 | 78262281 | 1178 | CarSat1 | red    | na |
| chrUn | 78262311 | 78263018 | 708  | CarSat1 | red    | na |
| chrUn | 78263048 | 78264117 | 1070 | CarSat1 | red    | na |
| chrUn | 78265119 | 78265966 | 848  | CarSat1 | red    | na |
| chrUn | 78265982 | 78266704 | 723  | CarSat1 | red    | na |
| chrUn | 78266720 | 78267683 | 964  | CarSat1 | red    | na |
| chrUn | 78267710 | 78268179 | 470  | CarSat1 | red    | na |
| chrUn | 78268195 | 78268916 | 722  | CarSat1 | red    | na |
| chrUn | 78268932 | 78269653 | 722  | CarSat1 | red    | na |

|       |          |          |      |         |      |    |
|-------|----------|----------|------|---------|------|----|
| chrUn | 78269678 | 78271128 | 1451 | CarSat1 | red  | na |
| chrUn | 78271153 | 78271855 | 703  | CarSat1 | red  | na |
| chrUn | 78271889 | 78272743 | 855  | CarSat1 | red  | na |
| chrUn | 78282388 | 78284411 | 2024 | CarSat1 | red  | na |
| chrUn | 78284438 | 78285390 | 953  | CarSat1 | red  | na |
| chrUn | 78285424 | 78286873 | 1450 | CarSat1 | red  | na |
| chrUn | 78286898 | 78288337 | 1440 | CarSat1 | red  | na |
| chrUn | 78288362 | 78289073 | 712  | CarSat1 | red  | na |
| chrUn | 78289098 | 78289946 | 849  | CarSat1 | red  | na |
| chrUn | 78318959 | 78320890 | 1932 | CarSat1 | red  | na |
| chrUn | 78320911 | 78326541 | 5631 | CarSat1 | red  | na |
| chrUn | 78327545 | 78328920 | 1376 | SAT1_CF | blue | na |
| chrUn | 78328973 | 78329476 | 504  | SAT1_CF | blue | na |
| chrUn | 78329487 | 78330595 | 1109 | SAT1_CF | blue | na |
| chrUn | 78330635 | 78331136 | 502  | SAT1_CF | blue | na |
| chrUn | 78331149 | 78331999 | 851  | SAT1_CF | blue | na |
| chrUn | 78332017 | 78332567 | 551  | SAT1_CF | blue | na |
| chrUn | 78332610 | 78333151 | 542  | SAT1_CF | blue | na |
| chrUn | 78333197 | 78333757 | 561  | SAT1_CF | blue | na |
| chrUn | 78333844 | 78334344 | 501  | SAT1_CF | blue | na |
| chrUn | 78334357 | 78335156 | 800  | SAT1_CF | blue | na |
| chrUn | 78336160 | 78336691 | 532  | CarSat1 | red  | na |
| chrUn | 78336707 | 78337658 | 952  | CarSat1 | red  | na |
| chrUn | 78337679 | 78338656 | 978  | CarSat1 | red  | na |
| chrUn | 78338690 | 78339394 | 705  | CarSat1 | red  | na |
| chrUn | 78339421 | 78342803 | 3383 | CarSat1 | red  | na |
| chrUn | 78342830 | 78343765 | 936  | CarSat1 | red  | na |
| chrUn | 78361993 | 78362402 | 410  | CarSat1 | red  | na |
| chrUn | 78362432 | 78362586 | 155  | CarSat1 | red  | na |
| chrUn | 78362772 | 78363334 | 563  | CarSat1 | red  | na |
| chrUn | 78363364 | 78364020 | 657  | CarSat1 | red  | na |
| chrUn | 78364216 | 78364462 | 247  | CarSat1 | red  | na |
| chrUn | 78364645 | 78365688 | 1044 | CarSat1 | red  | na |
| chrUn | 78365705 | 78366680 | 976  | CarSat1 | red  | na |
| chrUn | 78366710 | 78366864 | 155  | CarSat1 | red  | na |
| chrUn | 78367051 | 78367613 | 563  | CarSat1 | red  | na |
| chrUn | 78367643 | 78368302 | 660  | CarSat1 | red  | na |
| chrUn | 78368500 | 78368742 | 243  | CarSat1 | red  | na |
| chrUn | 78368923 | 78369575 | 653  | CarSat1 | red  | na |
| chrUn | 78370581 | 78372433 | 1853 | CarSat1 | red  | na |
| chrUn | 78372464 | 78373222 | 759  | CarSat1 | red  | na |
| chrUn | 78373237 | 78374909 | 1673 | CarSat1 | red  | na |

|       |          |          |      |         |        |    |
|-------|----------|----------|------|---------|--------|----|
| chrUn | 78374925 | 78375886 | 962  | CarSat1 | red    | na |
| chrUn | 78375912 | 78376373 | 462  | CarSat1 | red    | na |
| chrUn | 78376406 | 78377627 | 1222 | CarSat1 | red    | na |
| chrUn | 78377657 | 78378135 | 479  | CarSat1 | red    | na |
| chrUn | 78379196 | 78380280 | 1085 | CarSat1 | red    | na |
| chrUn | 78380296 | 78381996 | 1701 | CarSat1 | red    | na |
| chrUn | 78382023 | 78382731 | 709  | CarSat1 | red    | na |
| chrUn | 78382757 | 78383466 | 710  | CarSat1 | red    | na |
| chrUn | 78383493 | 78385945 | 2453 | CarSat1 | red    | na |
| chrUn | 78385981 | 78386764 | 784  | CarSat1 | red    | na |
| chrUn | 78399917 | 78401902 | 1986 | CarSat1 | red    | na |
| chrUn | 78401927 | 78402856 | 930  | CarSat1 | red    | na |
| chrUn | 78402893 | 78403870 | 978  | CarSat1 | red    | na |
| chrUn | 78403897 | 78407483 | 3587 | CarSat1 | red    | na |
| chrUn | 78413727 | 78413896 | 170  | SAT1_CF | blue   | na |
| chrUn | 78417067 | 78418638 | 1572 | CarSat1 | red    | na |
| chrUn | 78418665 | 78423062 | 4398 | CarSat1 | red    | na |
| chrUn | 78423089 | 78424641 | 1553 | CarSat1 | red    | na |
| chrUn | 78425642 | 78426647 | 1006 | CarSat1 | red    | na |
| chrUn | 78426674 | 78427884 | 1211 | CarSat1 | red    | na |
| chrUn | 78427908 | 78428863 | 956  | CarSat1 | red    | na |
| chrUn | 78428890 | 78429600 | 711  | CarSat1 | red    | na |
| chrUn | 78429627 | 78430096 | 470  | CarSat1 | red    | na |
| chrUn | 78430112 | 78431569 | 1458 | CarSat1 | red    | na |
| chrUn | 78431585 | 78432548 | 964  | CarSat1 | red    | na |
| chrUn | 78432575 | 78433203 | 629  | CarSat1 | red    | na |
| chrUn | 78434215 | 78435131 | 917  | CarSat1 | red    | na |
| chrUn | 78435147 | 78436108 | 962  | CarSat1 | red    | na |
| chrUn | 78436135 | 78437583 | 1449 | CarSat1 | red    | na |
| chrUn | 78437610 | 78438320 | 711  | CarSat1 | red    | na |
| chrUn | 78438347 | 78439058 | 712  | CarSat1 | red    | na |
| chrUn | 78439085 | 78439795 | 711  | CarSat1 | red    | na |
| chrUn | 78439822 | 78440531 | 710  | CarSat1 | red    | na |
| chrUn | 78440558 | 78441763 | 1206 | CarSat1 | red    | na |
| chrUn | 78442782 | 78443744 | 963  | CarSat1 | red    | na |
| chrUn | 78443775 | 78445711 | 1937 | CarSat1 | red    | na |
| chrUn | 78445727 | 78447181 | 1455 | CarSat1 | red    | na |
| chrUn | 78447197 | 78449630 | 2434 | CarSat1 | red    | na |
| chrUn | 78449657 | 78450317 | 661  | CarSat1 | red    | na |
| chrUn | 78451331 | 78452092 | 762  | CarSat1 | red    | na |
| chrUn | 78452126 | 78454527 | 2402 | CarSat1 | red    | na |
| chrUn | 78454542 | 78454668 | 127  | Carsat2 | orange | na |

|       |          |          |      |         |        |    |
|-------|----------|----------|------|---------|--------|----|
| chrUn | 78454557 | 78455268 | 712  | CarSat1 | red    | na |
| chrUn | 78455298 | 78456277 | 980  | CarSat1 | red    | na |
| chrUn | 78456299 | 78458868 | 2570 | CarSat1 | red    | na |
| chrUn | 78459898 | 78461096 | 1199 | CarSat1 | red    | na |
| chrUn | 78461112 | 78462779 | 1668 | CarSat1 | red    | na |
| chrUn | 78462809 | 78464041 | 1233 | CarSat1 | red    | na |
| chrUn | 78464066 | 78466239 | 2174 | CarSat1 | red    | na |
| chrUn | 78466264 | 78467426 | 1163 | CarSat1 | red    | na |
| chrUn | 78477022 | 78479590 | 2569 | CarSat1 | red    | na |
| chrUn | 78479617 | 78481063 | 1447 | CarSat1 | red    | na |
| chrUn | 78481090 | 78482803 | 1714 | CarSat1 | red    | na |
| chrUn | 78482840 | 78483760 | 921  | CarSat1 | red    | na |
| chrUn | 78483785 | 78484554 | 770  | CarSat1 | red    | na |
| chrUn | 78485560 | 78487290 | 1731 | CarSat1 | red    | na |
| chrUn | 78487305 | 78488979 | 1675 | CarSat1 | red    | na |
| chrUn | 78488995 | 78490238 | 1244 | CarSat1 | red    | na |
| chrUn | 78490253 | 78490993 | 741  | CarSat1 | red    | na |
| chrUn | 78491008 | 78491731 | 724  | CarSat1 | red    | na |
| chrUn | 78491746 | 78493063 | 1318 | CarSat1 | red    | na |
| chrUn | 78514718 | 78515164 | 447  | CarSat1 | red    | na |
| chrUn | 78515194 | 78515688 | 495  | CarSat1 | red    | na |
| chrUn | 78515713 | 78516638 | 926  | CarSat1 | red    | na |
| chrUn | 78516668 | 78517162 | 495  | CarSat1 | red    | na |
| chrUn | 78517187 | 78518112 | 926  | CarSat1 | red    | na |
| chrUn | 78518142 | 78520317 | 2176 | CarSat1 | red    | na |
| chrUn | 78520353 | 78521572 | 1220 | CarSat1 | red    | na |
| chrUn | 78521597 | 78522140 | 544  | CarSat1 | red    | na |
| chrUn | 78540204 | 78540771 | 568  | CarSat1 | red    | na |
| chrUn | 78540786 | 78540912 | 127  | Carsat2 | orange | na |
| chrUn | 78540801 | 78542244 | 1444 | CarSat1 | red    | na |
| chrUn | 78542259 | 78542385 | 127  | Carsat2 | orange | na |
| chrUn | 78542274 | 78542981 | 708  | CarSat1 | red    | na |
| chrUn | 78543011 | 78543723 | 713  | CarSat1 | red    | na |
| chrUn | 78543753 | 78544461 | 709  | CarSat1 | red    | na |
| chrUn | 78544476 | 78544603 | 128  | Carsat2 | orange | na |
| chrUn | 78544491 | 78545196 | 706  | CarSat1 | red    | na |
| chrUn | 78545211 | 78545337 | 127  | Carsat2 | orange | na |
| chrUn | 78545226 | 78545711 | 486  | CarSat1 | red    | na |
| chrUn | 78545744 | 78546670 | 927  | CarSat1 | red    | na |
| chrUn | 78546685 | 78546811 | 127  | Carsat2 | orange | na |
| chrUn | 78546700 | 78547721 | 1022 | CarSat1 | red    | na |
| chrUn | 78548721 | 78551097 | 2377 | CarSat1 | red    | na |

|       |          |          |      |         |        |    |
|-------|----------|----------|------|---------|--------|----|
| chrUn | 78551118 | 78553030 | 1913 | CarSat1 | red    | na |
| chrUn | 78553067 | 78554045 | 979  | CarSat1 | red    | na |
| chrUn | 78554066 | 78555033 | 968  | CarSat1 | red    | na |
| chrUn | 78555058 | 78555770 | 713  | CarSat1 | red    | na |
| chrUn | 78555795 | 78556223 | 429  | CarSat1 | red    | na |
| chrUn | 78582259 | 78583340 | 1082 | CarSat1 | red    | na |
| chrUn | 78583356 | 78584317 | 962  | CarSat1 | red    | na |
| chrUn | 78584343 | 78585548 | 1206 | CarSat1 | red    | na |
| chrUn | 78585564 | 78586285 | 722  | CarSat1 | red    | na |
| chrUn | 78586301 | 78589239 | 2939 | CarSat1 | red    | na |
| chrUn | 78589265 | 78589748 | 484  | CarSat1 | red    | na |
| chrUn | 78590765 | 78592200 | 1436 | CarSat1 | red    | na |
| chrUn | 78592230 | 78594413 | 2184 | CarSat1 | red    | na |
| chrUn | 78594440 | 78595151 | 712  | CarSat1 | red    | na |
| chrUn | 78595178 | 78595647 | 470  | CarSat1 | red    | na |
| chrUn | 78595663 | 78598227 | 2565 | CarSat1 | red    | na |
| chrUn | 78599264 | 78599881 | 618  | CarSat1 | red    | na |
| chrUn | 78599908 | 78600618 | 711  | CarSat1 | red    | na |
| chrUn | 78600645 | 78601360 | 716  | CarSat1 | red    | na |
| chrUn | 78601376 | 78601870 | 495  | CarSat1 | red    | na |
| chrUn | 78601900 | 78602839 | 940  | CarSat1 | red    | na |
| chrUn | 78602853 | 78605080 | 2228 | CarSat1 | red    | na |
| chrUn | 78605104 | 78606060 | 957  | CarSat1 | red    | na |
| chrUn | 78606087 | 78606766 | 680  | CarSat1 | red    | na |
| chrUn | 78607767 | 78607857 | 91   | Carsat2 | orange | na |
| chrUn | 78607777 | 78608419 | 643  | CarSat1 | red    | na |
| chrUn | 78608446 | 78609339 | 894  | CarSat1 | red    | na |
| chrUn | 78609350 | 78609807 | 458  | CarSat1 | red    | na |
| chrUn | 78609920 | 78613406 | 3487 | CarSat1 | red    | na |
| chrUn | 78613422 | 78615241 | 1820 | CarSat1 | red    | na |
| chrUn | 78616269 | 78618023 | 1755 | CarSat1 | red    | na |
| chrUn | 78618050 | 78619486 | 1437 | CarSat1 | red    | na |
| chrUn | 78619524 | 78620502 | 979  | CarSat1 | red    | na |
| chrUn | 78620532 | 78623221 | 2690 | CarSat1 | red    | na |
| chrUn | 78623248 | 78623771 | 524  | CarSat1 | red    | na |
| chrUn | 78625133 | 78627540 | 2408 | CarSat1 | red    | na |
| chrUn | 78627556 | 78628493 | 938  | CarSat1 | red    | na |
| chrUn | 78628523 | 78630489 | 1967 | CarSat1 | red    | na |
| chrUn | 78630505 | 78631712 | 1208 | CarSat1 | red    | na |
| chrUn | 78631739 | 78632266 | 528  | CarSat1 | red    | na |
| chrUn | 78633269 | 78634329 | 1061 | CarSat1 | red    | na |
| chrUn | 78634345 | 78635803 | 1459 | CarSat1 | red    | na |

|       |          |          |      |         |        |    |
|-------|----------|----------|------|---------|--------|----|
| chrUn | 78635819 | 78636780 | 962  | CarSat1 | red    | na |
| chrUn | 78636807 | 78637786 | 980  | CarSat1 | red    | na |
| chrUn | 78637816 | 78638256 | 441  | CarSat1 | red    | na |
| chrUn | 78638283 | 78640247 | 1965 | CarSat1 | red    | na |
| chrUn | 78640263 | 78640754 | 492  | CarSat1 | red    | na |
| chrUn | 78641780 | 78642282 | 503  | CarSat1 | red    | na |
| chrUn | 78642324 | 78644024 | 1701 | CarSat1 | red    | na |
| chrUn | 78644040 | 78644509 | 470  | CarSat1 | red    | na |
| chrUn | 78644535 | 78645495 | 961  | CarSat1 | red    | na |
| chrUn | 78645511 | 78646233 | 723  | CarSat1 | red    | na |
| chrUn | 78646250 | 78646719 | 470  | CarSat1 | red    | na |
| chrUn | 78646739 | 78648193 | 1455 | CarSat1 | red    | na |
| chrUn | 78648220 | 78649259 | 1040 | CarSat1 | red    | na |
| chrUn | 78650260 | 78655033 | 4774 | CarSat1 | red    | na |
| chrUn | 78655063 | 78656525 | 1463 | CarSat1 | red    | na |
| chrUn | 78656540 | 78657263 | 724  | CarSat1 | red    | na |
| chrUn | 78657278 | 78657722 | 445  | CarSat1 | red    | na |
| chrUn | 78658795 | 78661145 | 2351 | CarSat1 | red    | na |
| chrUn | 78661172 | 78662368 | 1197 | CarSat1 | red    | na |
| chrUn | 78662400 | 78663628 | 1229 | CarSat1 | red    | na |
| chrUn | 78663649 | 78664350 | 702  | CarSat1 | red    | na |
| chrUn | 78664387 | 78666217 | 1831 | CarSat1 | red    | na |
| chrUn | 78667263 | 78668221 | 959  | CarSat1 | red    | na |
| chrUn | 78668246 | 78669451 | 1206 | CarSat1 | red    | na |
| chrUn | 78669478 | 78670927 | 1450 | CarSat1 | red    | na |
| chrUn | 78670954 | 78671664 | 711  | CarSat1 | red    | na |
| chrUn | 78671691 | 78673869 | 2179 | CarSat1 | red    | na |
| chrUn | 78673900 | 78674700 | 801  | CarSat1 | red    | na |
| chrUn | 78684178 | 78685159 | 982  | CarSat1 | red    | na |
| chrUn | 78685189 | 78689573 | 4385 | CarSat1 | red    | na |
| chrUn | 78689595 | 78689721 | 127  | Carsat2 | orange | na |
| chrUn | 78689610 | 78690314 | 705  | CarSat1 | red    | na |
| chrUn | 78690344 | 78691049 | 706  | CarSat1 | red    | na |
| chrUn | 78691064 | 78691190 | 127  | Carsat2 | orange | na |
| chrUn | 78691079 | 78691642 | 564  | CarSat1 | red    | na |
| chrUn | 78692645 | 78695403 | 2759 | CarSat1 | red    | na |
| chrUn | 78695418 | 78695545 | 128  | Carsat2 | orange | na |
| chrUn | 78695433 | 78696141 | 709  | CarSat1 | red    | na |
| chrUn | 78696171 | 78697149 | 979  | CarSat1 | red    | na |
| chrUn | 78697176 | 78698130 | 955  | CarSat1 | red    | na |
| chrUn | 78698155 | 78700095 | 1941 | CarSat1 | red    | na |
| chrUn | 78701107 | 78702143 | 1037 | CarSat1 | red    | na |

|       |          |          |      |         |        |    |
|-------|----------|----------|------|---------|--------|----|
| chrUn | 78702170 | 78703619 | 1450 | CarSat1 | red    | na |
| chrUn | 78703646 | 78705093 | 1448 | CarSat1 | red    | na |
| chrUn | 78705120 | 78705830 | 711  | CarSat1 | red    | na |
| chrUn | 78705857 | 78708536 | 2680 | CarSat1 | red    | na |
| chrUn | 78709599 | 78710804 | 1206 | CarSat1 | red    | na |
| chrUn | 78710827 | 78711781 | 955  | CarSat1 | red    | na |
| chrUn | 78711812 | 78712517 | 706  | CarSat1 | red    | na |
| chrUn | 78712544 | 78713004 | 461  | CarSat1 | red    | na |
| chrUn | 78713029 | 78713992 | 964  | CarSat1 | red    | na |
| chrUn | 78714019 | 78714728 | 710  | CarSat1 | red    | na |
| chrUn | 78714755 | 78715465 | 711  | CarSat1 | red    | na |
| chrUn | 78715492 | 78716196 | 705  | CarSat1 | red    | na |
| chrUn | 78716223 | 78716933 | 711  | CarSat1 | red    | na |
| chrUn | 78718044 | 78718628 | 585  | CarSat1 | red    | na |
| chrUn | 78718655 | 78721576 | 2922 | CarSat1 | red    | na |
| chrUn | 78721603 | 78722063 | 461  | CarSat1 | red    | na |
| chrUn | 78722088 | 78725460 | 3373 | CarSat1 | red    | na |
| chrUn | 78734936 | 78735412 | 477  | CarSat1 | red    | na |
| chrUn | 78735449 | 78736162 | 714  | CarSat1 | red    | na |
| chrUn | 78736177 | 78737622 | 1446 | CarSat1 | red    | na |
| chrUn | 78737652 | 78738357 | 706  | CarSat1 | red    | na |
| chrUn | 78738387 | 78741536 | 3150 | CarSat1 | red    | na |
| chrUn | 78741557 | 78742382 | 826  | CarSat1 | red    | na |
| chrUn | 78760279 | 78762108 | 1830 | CarSat1 | red    | na |
| chrUn | 78762123 | 78762249 | 127  | Carsat2 | orange | na |
| chrUn | 78762138 | 78763583 | 1446 | CarSat1 | red    | na |
| chrUn | 78763600 | 78763724 | 125  | Carsat2 | orange | na |
| chrUn | 78763613 | 78764319 | 707  | CarSat1 | red    | na |
| chrUn | 78764334 | 78764461 | 128  | Carsat2 | orange | na |
| chrUn | 78764349 | 78765002 | 654  | CarSat1 | red    | na |
| chrUn | 78765629 | 78766843 | 1215 | CarSat1 | red    | na |
| chrUn | 78766854 | 78766984 | 131  | Carsat2 | orange | na |
| chrUn | 78766873 | 78767580 | 708  | CarSat1 | red    | na |
| chrUn | 78767610 | 78768317 | 708  | CarSat1 | red    | na |
| chrUn | 78777768 | 78778866 | 1099 | CarSat1 | red    | na |
| chrUn | 78778881 | 78779007 | 127  | Carsat2 | orange | na |
| chrUn | 78778896 | 78781350 | 2455 | CarSat1 | red    | na |
| chrUn | 78781371 | 78785208 | 3838 | CarSat1 | red    | na |
| chrUn | 78794647 | 78795745 | 1099 | CarSat1 | red    | na |
| chrUn | 78795772 | 78799189 | 3418 | CarSat1 | red    | na |
| chrUn | 78799214 | 78801172 | 1959 | CarSat1 | red    | na |
| chrUn | 78801202 | 78802055 | 854  | CarSat1 | red    | na |



|       |          |          |      |         |        |    |
|-------|----------|----------|------|---------|--------|----|
| chrUn | 78803083 | 78803934 | 852  | CarSat1 | red    | na |
| chrUn | 78803955 | 78805868 | 1914 | CarSat1 | red    | na |
| chrUn | 78805892 | 78806331 | 440  | CarSat1 | red    | na |
| chrUn | 78806368 | 78806862 | 495  | CarSat1 | red    | na |
| chrUn | 78806888 | 78807590 | 703  | CarSat1 | red    | na |
| chrUn | 78807615 | 78808337 | 723  | CarSat1 | red    | na |
| chrUn | 78808353 | 78809559 | 1207 | CarSat1 | red    | na |
| chrUn | 78809586 | 78810507 | 922  | CarSat1 | red    | na |
| chrUn | 78811549 | 78813898 | 2350 | CarSat1 | red    | na |
| chrUn | 78813925 | 78814636 | 712  | CarSat1 | red    | na |
| chrUn | 78814663 | 78815869 | 1207 | CarSat1 | red    | na |
| chrUn | 78815885 | 78817342 | 1458 | CarSat1 | red    | na |
| chrUn | 78817358 | 78818079 | 722  | CarSat1 | red    | na |
| chrUn | 78818095 | 78818936 | 842  | CarSat1 | red    | na |
| chrUn | 78819936 | 78820386 | 451  | CarSat1 | red    | na |
| chrUn | 78820417 | 78822018 | 1602 | CarSat1 | red    | na |
| chrUn | 78822039 | 78823640 | 1602 | CarSat1 | red    | na |
| chrUn | 78823661 | 78825263 | 1603 | CarSat1 | red    | na |
| chrUn | 78825284 | 78826876 | 1593 | CarSat1 | red    | na |
| chrUn | 78826907 | 78827346 | 440  | CarSat1 | red    | na |
| chrUn | 78828363 | 78829920 | 1558 | CarSat1 | red    | na |
| chrUn | 78829944 | 78832129 | 2186 | CarSat1 | red    | na |
| chrUn | 78832153 | 78835782 | 3630 | CarSat1 | red    | na |
| chrUn | 78836787 | 78838277 | 1491 | CarSat1 | red    | na |
| chrUn | 78838293 | 78839502 | 1210 | CarSat1 | red    | na |
| chrUn | 78839528 | 78840490 | 963  | CarSat1 | red    | na |
| chrUn | 78840505 | 78841712 | 1208 | CarSat1 | red    | na |
| chrUn | 78841739 | 78844174 | 2436 | CarSat1 | red    | na |
| chrUn | 78853658 | 78854616 | 959  | CarSat1 | red    | na |
| chrUn | 78854632 | 78855352 | 721  | CarSat1 | red    | na |
| chrUn | 78855368 | 78856575 | 1208 | CarSat1 | red    | na |
| chrUn | 78856602 | 78857311 | 710  | CarSat1 | red    | na |
| chrUn | 78857338 | 78858302 | 965  | CarSat1 | red    | na |
| chrUn | 78858318 | 78859037 | 720  | CarSat1 | red    | na |
| chrUn | 78859053 | 78859773 | 721  | CarSat1 | red    | na |
| chrUn | 78859799 | 78860968 | 1170 | CarSat1 | red    | na |
| chrUn | 78862093 | 78863539 | 1447 | CarSat1 | red    | na |
| chrUn | 78863566 | 78864746 | 1181 | CarSat1 | red    | na |
| chrUn | 78864761 | 78864884 | 124  | Carsat2 | orange | na |
| chrUn | 78864776 | 78865754 | 979  | CarSat1 | red    | na |
| chrUn | 78865781 | 78866744 | 964  | CarSat1 | red    | na |
| chrUn | 78866760 | 78867967 | 1208 | CarSat1 | red    | na |

|       |          |          |      |         |     |    |
|-------|----------|----------|------|---------|-----|----|
| chrUn | 78867994 | 78868706 | 713  | CarSat1 | red | na |
| chrUn | 78868734 | 78869429 | 696  | CarSat1 | red | na |
| chrUn | 78870464 | 78871185 | 722  | CarSat1 | red | na |
| chrUn | 78871201 | 78871695 | 495  | CarSat1 | red | na |
| chrUn | 78871725 | 78872898 | 1174 | CarSat1 | red | na |
| chrUn | 78872925 | 78873634 | 710  | CarSat1 | red | na |
| chrUn | 78873661 | 78874366 | 706  | CarSat1 | red | na |
| chrUn | 78874393 | 78874861 | 469  | CarSat1 | red | na |
| chrUn | 78874877 | 78875596 | 720  | CarSat1 | red | na |
| chrUn | 78875612 | 78877061 | 1450 | CarSat1 | red | na |
| chrUn | 78877077 | 78877839 | 763  | CarSat1 | red | na |
| chrUn | 78878885 | 78880768 | 1884 | CarSat1 | red | na |
| chrUn | 78880786 | 78882982 | 2197 | CarSat1 | red | na |
| chrUn | 78882998 | 78884454 | 1457 | CarSat1 | red | na |
| chrUn | 78884468 | 78886166 | 1699 | CarSat1 | red | na |
| chrUn | 78887238 | 78888519 | 1282 | CarSat1 | red | na |
| chrUn | 78888552 | 78889261 | 710  | CarSat1 | red | na |
| chrUn | 78889294 | 78890963 | 1670 | CarSat1 | red | na |
| chrUn | 78890993 | 78893193 | 2201 | CarSat1 | red | na |
| chrUn | 78893204 | 78893909 | 706  | CarSat1 | red | na |
| chrUn | 78893939 | 78894609 | 671  | CarSat1 | red | na |
| chrUn | 78904056 | 78904557 | 502  | CarSat1 | red | na |
| chrUn | 78904572 | 78906020 | 1449 | CarSat1 | red | na |
| chrUn | 78906050 | 78906773 | 724  | CarSat1 | red | na |
| chrUn | 78906788 | 78908964 | 2177 | CarSat1 | red | na |
| chrUn | 78908994 | 78909701 | 708  | CarSat1 | red | na |
| chrUn | 78909732 | 78911397 | 1666 | CarSat1 | red | na |
| chrUn | 78912426 | 78913133 | 708  | CarSat1 | red | na |
| chrUn | 78913150 | 78913870 | 721  | CarSat1 | red | na |
| chrUn | 78913886 | 78914843 | 958  | CarSat1 | red | na |
| chrUn | 78914870 | 78916077 | 1208 | CarSat1 | red | na |
| chrUn | 78916093 | 78916805 | 713  | CarSat1 | red | na |
| chrUn | 78916833 | 78917540 | 708  | CarSat1 | red | na |
| chrUn | 78917565 | 78919808 | 2244 | CarSat1 | red | na |
| chrUn | 78920816 | 78923217 | 2402 | CarSat1 | red | na |
| chrUn | 78923232 | 78928203 | 4972 | CarSat1 | red | na |
| chrUn | 78929208 | 78930049 | 842  | CarSat1 | red | na |
| chrUn | 78930070 | 78930783 | 714  | CarSat1 | red | na |
| chrUn | 78930810 | 78931520 | 711  | CarSat1 | red | na |
| chrUn | 78931547 | 78932016 | 470  | CarSat1 | red | na |
| chrUn | 78932032 | 78933995 | 1964 | CarSat1 | red | na |
| chrUn | 78934025 | 78934959 | 935  | CarSat1 | red | na |

|       |          |          |      |         |        |    |
|-------|----------|----------|------|---------|--------|----|
| chrUn | 78934975 | 78936591 | 1617 | CarSat1 | red    | na |
| chrUn | 78937592 | 78938869 | 1278 | CarSat1 | red    | na |
| chrUn | 78938896 | 78939970 | 1075 | CarSat1 | red    | na |
| chrUn | 78939997 | 78940707 | 711  | CarSat1 | red    | na |
| chrUn | 78940734 | 78942180 | 1447 | CarSat1 | red    | na |
| chrUn | 78942201 | 78942912 | 712  | CarSat1 | red    | na |
| chrUn | 78942939 | 78943901 | 963  | CarSat1 | red    | na |
| chrUn | 78943917 | 78944974 | 1058 | CarSat1 | red    | na |
| chrUn | 78945979 | 78946532 | 554  | CarSat1 | red    | na |
| chrUn | 78946559 | 78948501 | 1943 | CarSat1 | red    | na |
| chrUn | 78948517 | 78949238 | 722  | CarSat1 | red    | na |
| chrUn | 78949254 | 78950216 | 963  | CarSat1 | red    | na |
| chrUn | 78950243 | 78950953 | 711  | CarSat1 | red    | na |
| chrUn | 78950980 | 78952428 | 1449 | CarSat1 | red    | na |
| chrUn | 78952455 | 78953301 | 847  | CarSat1 | red    | na |
| chrUn | 78954350 | 78955117 | 768  | CarSat1 | red    | na |
| chrUn | 78955133 | 78956340 | 1208 | CarSat1 | red    | na |
| chrUn | 78956365 | 78960026 | 3662 | CarSat1 | red    | na |
| chrUn | 78960053 | 78960764 | 712  | CarSat1 | red    | na |
| chrUn | 78960791 | 78961714 | 924  | CarSat1 | red    | na |
| chrUn | 78962725 | 78964398 | 1674 | CarSat1 | red    | na |
| chrUn | 78964425 | 78965687 | 1263 | CarSat1 | red    | na |
| chrUn | 78965724 | 78967354 | 1631 | CarSat1 | red    | na |
| chrUn | 78967505 | 78968453 | 949  | CarSat1 | red    | na |
| chrUn | 78971091 | 78971880 | 790  | CarSat1 | red    | na |
| chrUn | 78971910 | 78973823 | 1914 | CarSat1 | red    | na |
| chrUn | 78973850 | 78975298 | 1449 | CarSat1 | red    | na |
| chrUn | 78975325 | 78976033 | 709  | CarSat1 | red    | na |
| chrUn | 78976060 | 78976770 | 711  | CarSat1 | red    | na |
| chrUn | 78976797 | 78977508 | 712  | CarSat1 | red    | na |
| chrUn | 78977535 | 78978446 | 912  | CarSat1 | red    | na |
| chrUn | 78984535 | 78985418 | 884  | CarSat1 | red    | na |
| chrUn | 78985640 | 78986769 | 1130 | CarSat1 | red    | na |
| chrUn | 78987826 | 78990142 | 2317 | CarSat1 | red    | na |
| chrUn | 78990167 | 78993849 | 3683 | CarSat1 | red    | na |
| chrUn | 78993874 | 78995157 | 1284 | CarSat1 | red    | na |
| chrUn | 78996167 | 78996611 | 445  | CarSat1 | red    | na |
| chrUn | 78996626 | 78996753 | 128  | Carsat2 | orange | na |
| chrUn | 78996641 | 78997619 | 979  | CarSat1 | red    | na |
| chrUn | 78997646 | 78999584 | 1939 | CarSat1 | red    | na |
| chrUn | 78999611 | 79001057 | 1447 | CarSat1 | red    | na |
| chrUn | 79001078 | 79003502 | 2425 | CarSat1 | red    | na |

|       |          |          |      |         |     |    |
|-------|----------|----------|------|---------|-----|----|
| chrUn | 79031868 | 79033058 | 1191 | CarSat1 | red | na |
| chrUn | 79033079 | 79034784 | 1706 | CarSat1 | red | na |
| chrUn | 79034809 | 79035734 | 926  | CarSat1 | red | na |
| chrUn | 79035764 | 79036258 | 495  | CarSat1 | red | na |
| chrUn | 79036283 | 79036994 | 712  | CarSat1 | red | na |
| chrUn | 79037019 | 79039196 | 2178 | CarSat1 | red | na |
| chrUn | 79040204 | 79041039 | 836  | CarSat1 | red | na |
| chrUn | 79041054 | 79041775 | 722  | CarSat1 | red | na |
| chrUn | 79041790 | 79042511 | 722  | CarSat1 | red | na |
| chrUn | 79042526 | 79043232 | 707  | CarSat1 | red | na |
| chrUn | 79043262 | 79043983 | 722  | CarSat1 | red | na |
| chrUn | 79043998 | 79044718 | 721  | CarSat1 | red | na |
| chrUn | 79044733 | 79045658 | 926  | CarSat1 | red | na |
| chrUn | 79045691 | 79046192 | 502  | CarSat1 | red | na |
| chrUn | 79046207 | 79046932 | 726  | CarSat1 | red | na |
| chrUn | 79046947 | 79047522 | 576  | CarSat1 | red | na |
| chrUn | 79048539 | 79050663 | 2125 | CarSat1 | red | na |
| chrUn | 79050688 | 79051159 | 472  | CarSat1 | red | na |
| chrUn | 79051184 | 79052137 | 954  | CarSat1 | red | na |
| chrUn | 79052164 | 79052874 | 711  | CarSat1 | red | na |
| chrUn | 79052901 | 79054836 | 1936 | CarSat1 | red | na |
| chrUn | 79054861 | 79055831 | 971  | CarSat1 | red | na |
| chrUn | 79065187 | 79066024 | 838  | CarSat1 | red | na |
| chrUn | 79066054 | 79066761 | 708  | CarSat1 | red | na |
| chrUn | 79066791 | 79067512 | 722  | CarSat1 | red | na |
| chrUn | 79067527 | 79068248 | 722  | CarSat1 | red | na |
| chrUn | 79068263 | 79068985 | 723  | CarSat1 | red | na |
| chrUn | 79068999 | 79069726 | 728  | CarSat1 | red | na |
| chrUn | 79069741 | 79070463 | 723  | CarSat1 | red | na |
| chrUn | 79070478 | 79071201 | 724  | CarSat1 | red | na |
| chrUn | 79071215 | 79071926 | 712  | CarSat1 | red | na |
| chrUn | 79071956 | 79072476 | 521  | CarSat1 | red | na |
| chrUn | 79081831 | 79082399 | 569  | CarSat1 | red | na |
| chrUn | 79082429 | 79083130 | 702  | CarSat1 | red | na |
| chrUn | 79083164 | 79083868 | 705  | CarSat1 | red | na |
| chrUn | 79083898 | 79085331 | 1434 | CarSat1 | red | na |
| chrUn | 79085365 | 79086590 | 1226 | CarSat1 | red | na |
| chrUn | 79086623 | 79087331 | 709  | CarSat1 | red | na |
| chrUn | 79087364 | 79088073 | 710  | CarSat1 | red | na |
| chrUn | 79088106 | 79089118 | 1013 | CarSat1 | red | na |
| chrUn | 79090135 | 79092508 | 2374 | CarSat1 | red | na |
| chrUn | 79092533 | 79093492 | 960  | CarSat1 | red | na |

|       |          |          |      |         |        |    |
|-------|----------|----------|------|---------|--------|----|
| chrUn | 79093513 | 79094229 | 717  | CarSat1 | red    | na |
| chrUn | 79094250 | 79095455 | 1206 | CarSat1 | red    | na |
| chrUn | 79095480 | 79096435 | 956  | CarSat1 | red    | na |
| chrUn | 79096456 | 79097432 | 977  | CarSat1 | red    | na |
| chrUn | 79106752 | 79108311 | 1560 | CarSat1 | red    | na |
| chrUn | 79108332 | 79109928 | 1597 | CarSat1 | red    | na |
| chrUn | 79109959 | 79111546 | 1588 | CarSat1 | red    | na |
| chrUn | 79111567 | 79113169 | 1603 | CarSat1 | red    | na |
| chrUn | 79113200 | 79114048 | 849  | CarSat1 | red    | na |
| chrUn | 79115122 | 79116082 | 961  | CarSat1 | red    | na |
| chrUn | 79116107 | 79116919 | 813  | CarSat1 | red    | na |
| chrUn | 79117113 | 79118260 | 1148 | CarSat1 | red    | na |
| chrUn | 79118287 | 79119250 | 964  | CarSat1 | red    | na |
| chrUn | 79119266 | 79119735 | 470  | CarSat1 | red    | na |
| chrUn | 79119762 | 79120468 | 707  | CarSat1 | red    | na |
| chrUn | 79120495 | 79121668 | 1174 | CarSat1 | red    | na |
| chrUn | 79121702 | 79122271 | 570  | CarSat1 | red    | na |
| chrUn | 79123372 | 79123540 | 169  | Carsat2 | orange | na |
| chrUn | 79123391 | 79124354 | 964  | CarSat1 | red    | na |
| chrUn | 79124370 | 79124839 | 470  | CarSat1 | red    | na |
| chrUn | 79124866 | 79125577 | 712  | CarSat1 | red    | na |
| chrUn | 79125604 | 79128775 | 3172 | CarSat1 | red    | na |
| chrUn | 79128791 | 79129258 | 468  | CarSat1 | red    | na |
| chrUn | 79129285 | 79129995 | 711  | CarSat1 | red    | na |
| chrUn | 79130022 | 79130648 | 627  | CarSat1 | red    | na |
| chrUn | 79131648 | 79132144 | 497  | CarSat1 | red    | na |
| chrUn | 79132171 | 79133134 | 964  | CarSat1 | red    | na |
| chrUn | 79133150 | 79134356 | 1207 | CarSat1 | red    | na |
| chrUn | 79134383 | 79135094 | 712  | CarSat1 | red    | na |
| chrUn | 79135121 | 79136818 | 1698 | CarSat1 | red    | na |
| chrUn | 79136834 | 79138945 | 2112 | CarSat1 | red    | na |
| chrUn | 79139945 | 79140910 | 966  | CarSat1 | red    | na |
| chrUn | 79140937 | 79141646 | 710  | CarSat1 | red    | na |
| chrUn | 79141673 | 79142384 | 712  | CarSat1 | red    | na |
| chrUn | 79142411 | 79143120 | 710  | CarSat1 | red    | na |
| chrUn | 79143147 | 79143857 | 711  | CarSat1 | red    | na |
| chrUn | 79143884 | 79144842 | 959  | CarSat1 | red    | na |
| chrUn | 79144858 | 79145908 | 1051 | CarSat1 | red    | na |
| chrUn | 79146172 | 79146356 | 185  | Carsat2 | orange | na |
| chrUn | 79146195 | 79147208 | 1014 | CarSat1 | red    | na |
| chrUn | 79148235 | 79148837 | 603  | SAT1_CF | blue   | na |
| chrUn | 79148850 | 79149350 | 501  | SAT1_CF | blue   | na |

|       |          |          |              |        |    |
|-------|----------|----------|--------------|--------|----|
| chrUn | 79150237 | 79151741 | 1505 SAT1_CF | blue   | na |
| chrUn | 79152805 | 79153898 | 1094 SAT1_CF | blue   | na |
| chrUn | 79153911 | 79155850 | 1940 SAT1_CF | blue   | na |
| chrUn | 79155893 | 79156892 | 1000 SAT1_CF | blue   | na |
| chrUn | 79156912 | 79157456 | 545 SAT1_CF  | blue   | na |
| chrUn | 79158462 | 79160931 | 2470 CarSat1 | red    | na |
| chrUn | 79160964 | 79162626 | 1663 CarSat1 | red    | na |
| chrUn | 79162641 | 79162767 | 127 Carsat2  | orange | na |
| chrUn | 79162656 | 79163878 | 1223 CarSat1 | red    | na |
| chrUn | 79163902 | 79164836 | 935 CarSat1  | red    | na |
| chrUn | 79164868 | 79165721 | 854 CarSat1  | red    | na |
| chrUn | 79175030 | 79176242 | 1213 SAT1_CF | blue   | na |
| chrUn | 79176272 | 79177224 | 953 SAT1_CF  | blue   | na |
| chrUn | 79177246 | 79178509 | 1264 SAT1_CF | blue   | na |
| chrUn | 79178522 | 79179892 | 1371 SAT1_CF | blue   | na |
| chrUn | 79179935 | 79180573 | 639 SAT1_CF  | blue   | na |
| chrUn | 79180626 | 79181185 | 560 SAT1_CF  | blue   | na |
| chrUn | 79181228 | 79181752 | 525 SAT1_CF  | blue   | na |
| chrUn | 79181767 | 79182302 | 536 SAT1_CF  | blue   | na |
| chrUn | 79183508 | 79184591 | 1084 CarSat1 | red    | na |
| chrUn | 79184609 | 79186580 | 1972 CarSat1 | red    | na |
| chrUn | 79186582 | 79186975 | 394 SAT1_CF  | blue   | na |
| chrUn | 79186997 | 79188250 | 1254 SAT1_CF | blue   | na |
| chrUn | 79188261 | 79189485 | 1225 SAT1_CF | blue   | na |
| chrUn | 79189497 | 79190571 | 1075 SAT1_CF | blue   | na |
| chrUn | 79208136 | 79209845 | 1710 CarSat1 | red    | na |
| chrUn | 79209878 | 79210803 | 926 CarSat1  | red    | na |
| chrUn | 79210818 | 79210944 | 127 Carsat2  | orange | na |
| chrUn | 79210833 | 79213283 | 2451 CarSat1 | red    | na |
| chrUn | 79213304 | 79214488 | 1185 CarSat1 | red    | na |
| chrUn | 79214518 | 79215385 | 868 CarSat1  | red    | na |
| chrUn | 79224671 | 79227059 | 2389 CarSat1 | red    | na |
| chrUn | 79227086 | 79228048 | 963 CarSat1  | red    | na |
| chrUn | 79228073 | 79231927 | 3855 CarSat1 | red    | na |
| chrUn | 79232942 | 79234172 | 1231 CarSat1 | red    | na |
| chrUn | 79234199 | 79234902 | 704 CarSat1  | red    | na |
| chrUn | 79234929 | 79235908 | 980 CarSat1  | red    | na |
| chrUn | 79235945 | 79236640 | 696 CarSat1  | red    | na |
| chrUn | 79236670 | 79237109 | 440 CarSat1  | red    | na |
| chrUn | 79237136 | 79240195 | 3060 CarSat1 | red    | na |
| chrUn | 79249463 | 79250241 | 779 CarSat1  | red    | na |
| chrUn | 79250281 | 79252737 | 2457 CarSat1 | red    | na |

|       |          |          |      |         |        |    |
|-------|----------|----------|------|---------|--------|----|
| chrUn | 79252764 | 79253716 | 953  | CarSat1 | red    | na |
| chrUn | 79253741 | 79254453 | 713  | CarSat1 | red    | na |
| chrUn | 79254478 | 79255190 | 713  | CarSat1 | red    | na |
| chrUn | 79255215 | 79255933 | 719  | CarSat1 | red    | na |
| chrUn | 79255960 | 79256662 | 703  | CarSat1 | red    | na |
| chrUn | 79257853 | 79258780 | 928  | CarSat1 | red    | na |
| chrUn | 79258795 | 79258922 | 128  | Carsat2 | orange | na |
| chrUn | 79258810 | 79260770 | 1961 | CarSat1 | red    | na |
| chrUn | 79260784 | 79261725 | 942  | CarSat1 | red    | na |
| chrUn | 79261755 | 79263469 | 1715 | CarSat1 | red    | na |
| chrUn | 79263496 | 79264921 | 1426 | CarSat1 | red    | na |
| chrUn | 79265981 | 79266782 | 802  | CarSat1 | red    | na |
| chrUn | 79266809 | 79267520 | 712  | CarSat1 | red    | na |
| chrUn | 79267547 | 79270466 | 2920 | CarSat1 | red    | na |
| chrUn | 79270493 | 79272677 | 2185 | CarSat1 | red    | na |
| chrUn | 79272704 | 79273218 | 515  | CarSat1 | red    | na |
| chrUn | 79274218 | 79275634 | 1417 | CarSat1 | red    | na |
| chrUn | 79275659 | 79277349 | 1691 | CarSat1 | red    | na |
| chrUn | 79277374 | 79277843 | 470  | CarSat1 | red    | na |
| chrUn | 79277870 | 79278821 | 952  | CarSat1 | red    | na |
| chrUn | 79278846 | 79279567 | 722  | CarSat1 | red    | na |
| chrUn | 79279583 | 79279654 | 72   | CarSat1 | red    | na |
| chrUn | 79279841 | 79281457 | 1617 | CarSat1 | red    | na |
| chrUn | 79282469 | 79285980 | 3512 | CarSat1 | red    | na |
| chrUn | 79286007 | 79288554 | 2548 | CarSat1 | red    | na |
| chrUn | 79288570 | 79289719 | 1150 | CarSat1 | red    | na |
| chrUn | 79290727 | 79290825 | 99   | Carsat2 | orange | na |
| chrUn | 79290745 | 79291847 | 1103 | CarSat1 | red    | na |
| chrUn | 79291885 | 79292378 | 494  | CarSat1 | red    | na |
| chrUn | 79292394 | 79296793 | 4400 | CarSat1 | red    | na |
| chrUn | 79296809 | 79297956 | 1148 | CarSat1 | red    | na |
| chrUn | 79298973 | 79301392 | 2420 | CarSat1 | red    | na |
| chrUn | 79301417 | 79303599 | 2183 | CarSat1 | red    | na |
| chrUn | 79303626 | 79304096 | 471  | CarSat1 | red    | na |
| chrUn | 79304110 | 79305074 | 965  | CarSat1 | red    | na |
| chrUn | 79305101 | 79306185 | 1085 | CarSat1 | red    | na |
| chrUn | 79307201 | 79308982 | 1782 | CarSat1 | red    | na |
| chrUn | 79309013 | 79309949 | 937  | CarSat1 | red    | na |
| chrUn | 79309992 | 79310179 | 188  | CarSat1 | red    | na |
| chrUn | 79310373 | 79312819 | 2447 | CarSat1 | red    | na |
| chrUn | 79312849 | 79313556 | 708  | CarSat1 | red    | na |
| chrUn | 79313586 | 79314422 | 837  | CarSat1 | red    | na |

|       |          |          |      |         |        |    |
|-------|----------|----------|------|---------|--------|----|
| chrUn | 79315661 | 79316559 | 899  | CarSat1 | red    | na |
| chrUn | 79316584 | 79317804 | 1221 | CarSat1 | red    | na |
| chrUn | 79317834 | 79319508 | 1675 | CarSat1 | red    | na |
| chrUn | 79319530 | 79320240 | 711  | CarSat1 | red    | na |
| chrUn | 79320265 | 79321486 | 1222 | CarSat1 | red    | na |
| chrUn | 79321516 | 79322500 | 985  | CarSat1 | red    | na |
| chrUn | 79326769 | 79327242 | 474  | Sat2CF  | purple | na |
| chrUn | 79326821 | 79327655 | 835  | Sat2CF  | purple | na |
| chrUn | 79327198 | 79327720 | 523  | Sat2CF  | purple | na |
| chrUn | 79340136 | 79340810 | 675  | CarSat1 | red    | na |
| chrUn | 79340831 | 79343510 | 2680 | CarSat1 | red    | na |
| chrUn | 79343535 | 79345224 | 1690 | CarSat1 | red    | na |
| chrUn | 79345251 | 79346696 | 1446 | CarSat1 | red    | na |
| chrUn | 79346723 | 79347337 | 615  | CarSat1 | red    | na |
| chrUn | 79348339 | 79350031 | 1693 | CarSat1 | red    | na |
| chrUn | 79350047 | 79352978 | 2932 | CarSat1 | red    | na |
| chrUn | 79352994 | 79354693 | 1700 | CarSat1 | red    | na |
| chrUn | 79354720 | 79355559 | 840  | CarSat1 | red    | na |
| chrUn | 79356567 | 79358229 | 1663 | CarSat1 | red    | na |
| chrUn | 79358245 | 79358714 | 470  | CarSat1 | red    | na |
| chrUn | 79358741 | 79359451 | 711  | CarSat1 | red    | na |
| chrUn | 79359478 | 79361662 | 2185 | CarSat1 | red    | na |
| chrUn | 79361689 | 79362652 | 964  | CarSat1 | red    | na |
| chrUn | 79362668 | 79363749 | 1082 | CarSat1 | red    | na |
| chrUn | 79364780 | 79366034 | 1255 | CarSat1 | red    | na |
| chrUn | 79366061 | 79367024 | 964  | CarSat1 | red    | na |
| chrUn | 79367040 | 79367975 | 936  | CarSat1 | red    | na |
| chrUn | 79368005 | 79368984 | 980  | CarSat1 | red    | na |
| chrUn | 79369011 | 79370459 | 1449 | CarSat1 | red    | na |
| chrUn | 79370486 | 79371448 | 963  | CarSat1 | red    | na |
| chrUn | 79371464 | 79371994 | 531  | CarSat1 | red    | na |
| chrUn | 79373030 | 79378308 | 5279 | CarSat1 | red    | na |
| chrUn | 79378329 | 79380217 | 1889 | CarSat1 | red    | na |
| chrUn | 79389431 | 79390693 | 1263 | CarSat1 | red    | na |
| chrUn | 79390718 | 79391671 | 954  | CarSat1 | red    | na |
| chrUn | 79391698 | 79392409 | 712  | CarSat1 | red    | na |
| chrUn | 79392436 | 79393429 | 994  | CarSat1 | red    | na |
| chrUn | 79393444 | 79394889 | 1446 | CarSat1 | red    | na |
| chrUn | 79394919 | 79395627 | 709  | CarSat1 | red    | na |
| chrUn | 79395657 | 79396097 | 441  | CarSat1 | red    | na |
| chrUn | 79396124 | 79396640 | 517  | CarSat1 | red    | na |
| chrUn | 79398154 | 79398577 | 424  | CarSat1 | red    | na |



|       |          |          |      |         |      |    |
|-------|----------|----------|------|---------|------|----|
| chrUn | 79398685 | 79399333 | 649  | CarSat1 | red  | na |
| chrUn | 79399326 | 79399853 | 528  | SAT1_CF | blue | na |
| chrUn | 79399897 | 79400417 | 521  | SAT1_CF | blue | na |
| chrUn | 79400451 | 79401719 | 1269 | SAT1_CF | blue | na |
| chrUn | 79405851 | 79408015 | 2165 | CarSat1 | red  | na |
| chrUn | 79408045 | 79408757 | 713  | CarSat1 | red  | na |
| chrUn | 79408787 | 79409273 | 487  | CarSat1 | red  | na |
| chrUn | 79409307 | 79410233 | 927  | CarSat1 | red  | na |
| chrUn | 79410263 | 79411709 | 1447 | CarSat1 | red  | na |
| chrUn | 79411739 | 79413049 | 1311 | CarSat1 | red  | na |
| chrUn | 79414064 | 79414776 | 713  | CarSat1 | red  | na |
| chrUn | 79414801 | 79415501 | 701  | CarSat1 | red  | na |
| chrUn | 79415526 | 79416250 | 725  | CarSat1 | red  | na |
| chrUn | 79416275 | 79416986 | 712  | CarSat1 | red  | na |
| chrUn | 79417012 | 79417938 | 927  | CarSat1 | red  | na |
| chrUn | 79417968 | 79420154 | 2187 | CarSat1 | red  | na |
| chrUn | 79420184 | 79421264 | 1081 | CarSat1 | red  | na |
| chrUn | 79430680 | 79431228 | 549  | CarSat1 | red  | na |
| chrUn | 79431255 | 79433425 | 2171 | CarSat1 | red  | na |
| chrUn | 79433464 | 79434174 | 711  | CarSat1 | red  | na |
| chrUn | 79434201 | 79436132 | 1932 | CarSat1 | red  | na |
| chrUn | 79436157 | 79437130 | 974  | CarSat1 | red  | na |
| chrUn | 79437148 | 79437855 | 708  | CarSat1 | red  | na |
| chrUn | 79447083 | 79448437 | 1355 | CarSat1 | red  | na |
| chrUn | 79448471 | 79449175 | 705  | CarSat1 | red  | na |
| chrUn | 79449205 | 79449906 | 702  | CarSat1 | red  | na |
| chrUn | 79449940 | 79450641 | 702  | CarSat1 | red  | na |
| chrUn | 79450675 | 79451376 | 702  | CarSat1 | red  | na |
| chrUn | 79451410 | 79452388 | 979  | CarSat1 | red  | na |
| chrUn | 79452414 | 79453858 | 1445 | CarSat1 | red  | na |
| chrUn | 79453879 | 79454258 | 380  | CarSat1 | red  | na |
| chrUn | 79455321 | 79456818 | 1498 | CarSat1 | red  | na |
| chrUn | 79456844 | 79461255 | 4412 | CarSat1 | red  | na |
| chrUn | 79461294 | 79462420 | 1127 | CarSat1 | red  | na |
| chrUn | 79463471 | 79466271 | 2801 | CarSat1 | red  | na |
| chrUn | 79466298 | 79467504 | 1207 | CarSat1 | red  | na |
| chrUn | 79467520 | 79469712 | 2193 | CarSat1 | red  | na |
| chrUn | 79469739 | 79470652 | 914  | CarSat1 | red  | na |
| chrUn | 79471660 | 79472742 | 1083 | CarSat1 | red  | na |
| chrUn | 79472763 | 79474954 | 2192 | CarSat1 | red  | na |
| chrUn | 79474981 | 79477165 | 2185 | CarSat1 | red  | na |
| chrUn | 79477192 | 79477624 | 433  | CarSat1 | red  | na |

|       |          |          |      |         |      |    |
|-------|----------|----------|------|---------|------|----|
| chrUn | 79477661 | 79478852 | 1192 | CarSat1 | red  | na |
| chrUn | 79479858 | 79480378 | 521  | CarSat1 | red  | na |
| chrUn | 79480405 | 79481383 | 979  | CarSat1 | red  | na |
| chrUn | 79481413 | 79482140 | 728  | CarSat1 | red  | na |
| chrUn | 79482155 | 79482863 | 709  | CarSat1 | red  | na |
| chrUn | 79482893 | 79483824 | 932  | CarSat1 | red  | na |
| chrUn | 79483857 | 79485086 | 1230 | CarSat1 | red  | na |
| chrUn | 79485116 | 79485823 | 708  | CarSat1 | red  | na |
| chrUn | 79485853 | 79487038 | 1186 | CarSat1 | red  | na |
| chrUn | 79488058 | 79489140 | 1083 | CarSat1 | red  | na |
| chrUn | 79489156 | 79490855 | 1700 | CarSat1 | red  | na |
| chrUn | 79490882 | 79492086 | 1205 | CarSat1 | red  | na |
| chrUn | 79492102 | 79492822 | 721  | CarSat1 | red  | na |
| chrUn | 79492838 | 79493802 | 965  | CarSat1 | red  | na |
| chrUn | 79493829 | 79494298 | 470  | CarSat1 | red  | na |
| chrUn | 79494314 | 79495221 | 908  | CarSat1 | red  | na |
| chrUn | 79496255 | 79497537 | 1283 | CarSat1 | red  | na |
| chrUn | 79497568 | 79499170 | 1603 | CarSat1 | red  | na |
| chrUn | 79499191 | 79500791 | 1601 | CarSat1 | red  | na |
| chrUn | 79500812 | 79502391 | 1580 | CarSat1 | red  | na |
| chrUn | 79502431 | 79503396 | 966  | CarSat1 | red  | na |
| chrUn | 79504445 | 79507180 | 2736 | CarSat1 | red  | na |
| chrUn | 79507210 | 79508432 | 1223 | CarSat1 | red  | na |
| chrUn | 79508456 | 79511593 | 3138 | CarSat1 | red  | na |
| chrUn | 79512597 | 79513399 | 803  | CarSat1 | red  | na |
| chrUn | 79513426 | 79513894 | 469  | CarSat1 | red  | na |
| chrUn | 79513910 | 79514631 | 722  | CarSat1 | red  | na |
| chrUn | 79514647 | 79516104 | 1458 | CarSat1 | red  | na |
| chrUn | 79516120 | 79519759 | 3640 | CarSat1 | red  | na |
| chrUn | 79520795 | 79521916 | 1122 | CarSat1 | red  | na |
| chrUn | 79521932 | 79522652 | 721  | CarSat1 | red  | na |
| chrUn | 79522668 | 79523389 | 722  | CarSat1 | red  | na |
| chrUn | 79523405 | 79524368 | 964  | CarSat1 | red  | na |
| chrUn | 79524395 | 79525105 | 711  | CarSat1 | red  | na |
| chrUn | 79525132 | 79525843 | 712  | CarSat1 | red  | na |
| chrUn | 79525870 | 79527924 | 2055 | CarSat1 | red  | na |
| chrUn | 79529883 | 79529993 | 111  | SAT1_CF | blue | na |
| chrUn | 79530055 | 79530604 | 550  | SAT1_CF | blue | na |
| chrUn | 79530617 | 79530753 | 137  | SAT1_CF | blue | na |
| chrUn | 79530828 | 79532475 | 1648 | SAT1_CF | blue | na |
| chrUn | 79532538 | 79533638 | 1101 | SAT1_CF | blue | na |
| chrUn | 79533650 | 79533912 | 263  | SAT1_CF | blue | na |

|       |          |          |              |        |    |
|-------|----------|----------|--------------|--------|----|
| chrUn | 79533946 | 79534856 | 911 SAT1_CF  | blue   | na |
| chrUn | 79534851 | 79535573 | 723 CarSat1  | red    | na |
| chrUn | 79535726 | 79536031 | 306 CarSat1  | red    | na |
| chrUn | 79537115 | 79537825 | 711 CarSat1  | red    | na |
| chrUn | 79537851 | 79540301 | 2451 CarSat1 | red    | na |
| chrUn | 79540331 | 79540772 | 442 CarSat1  | red    | na |
| chrUn | 79540799 | 79542247 | 1449 CarSat1 | red    | na |
| chrUn | 79542274 | 79543287 | 1014 CarSat1 | red    | na |
| chrUn | 79543633 | 79543873 | 241 Carsat2  | orange | na |
| chrUn | 79543661 | 79544245 | 585 CarSat1  | red    | na |
| chrUn | 79545255 | 79545748 | 494 CarSat1  | red    | na |
| chrUn | 79545788 | 79546704 | 917 CarSat1  | red    | na |
| chrUn | 79546720 | 79547438 | 719 CarSat1  | red    | na |
| chrUn | 79547454 | 79549152 | 1699 CarSat1 | red    | na |
| chrUn | 79549179 | 79550385 | 1207 CarSat1 | red    | na |
| chrUn | 79550402 | 79552390 | 1989 CarSat1 | red    | na |
| chrUn | 79553412 | 79554274 | 863 CarSat1  | red    | na |
| chrUn | 79554298 | 79556706 | 2409 CarSat1 | red    | na |
| chrUn | 79556736 | 79557444 | 709 CarSat1  | red    | na |
| chrUn | 79557474 | 79558919 | 1446 CarSat1 | red    | na |
| chrUn | 79558949 | 79559656 | 708 CarSat1  | red    | na |
| chrUn | 79559671 | 79559797 | 127 Carsat2  | orange | na |
| chrUn | 79559686 | 79560540 | 855 CarSat1  | red    | na |
| chrUn | 79571573 | 79574855 | 3283 CarSat1 | red    | na |
| chrUn | 79574871 | 79577796 | 2926 CarSat1 | red    | na |
| chrUn | 79577821 | 79578716 | 896 CarSat1  | red    | na |
| chrUn | 79580703 | 79581531 | 829 Sat2CF   | purple | na |
| chrUn | 79581213 | 79581570 | 358 Sat2CF   | purple | na |
| chrUn | 79581436 | 79581598 | 163 Sat2CF   | purple | na |
| chrUn | 79588499 | 79589202 | 704 CarSat1  | red    | na |
| chrUn | 79589224 | 79591193 | 1970 CarSat1 | red    | na |
| chrUn | 79591195 | 79594475 | 3281 SAT1_CF | blue   | na |
| chrUn | 79594515 | 79595015 | 501 SAT1_CF  | blue   | na |
| chrUn | 79596027 | 79596706 | 680 CarSat1  | red    | na |
| chrUn | 79596736 | 79597715 | 980 CarSat1  | red    | na |
| chrUn | 79597742 | 79598920 | 1179 CarSat1 | red    | na |
| chrUn | 79598950 | 79600178 | 1229 CarSat1 | red    | na |
| chrUn | 79600194 | 79602140 | 1947 CarSat1 | red    | na |
| chrUn | 79602161 | 79603129 | 969 CarSat1  | red    | na |
| chrUn | 79612346 | 79613183 | 838 CarSat1  | red    | na |
| chrUn | 79613199 | 79616127 | 2929 CarSat1 | red    | na |
| chrUn | 79616152 | 79617116 | 965 CarSat1  | red    | na |

|       |          |          |      |         |        |    |
|-------|----------|----------|------|---------|--------|----|
| chrUn | 79617143 | 79617852 | 710  | CarSat1 | red    | na |
| chrUn | 79617879 | 79618589 | 711  | CarSat1 | red    | na |
| chrUn | 79618616 | 79619402 | 787  | CarSat1 | red    | na |
| chrUn | 79628372 | 79629246 | 875  | Sat2CF  | purple | na |
| chrUn | 79628447 | 79629170 | 724  | Sat2CF  | purple | na |
| chrUn | 79639728 | 79641779 | 2052 | CarSat1 | red    | na |
| chrUn | 79641804 | 79643251 | 1448 | CarSat1 | red    | na |
| chrUn | 79643276 | 79644725 | 1450 | CarSat1 | red    | na |
| chrUn | 79644750 | 79644874 | 125  | CarSat1 | red    | na |
| chrUn | 79645068 | 79646188 | 1121 | CarSat1 | red    | na |
| chrUn | 79646218 | 79646793 | 576  | CarSat1 | red    | na |
| chrUn | 79647812 | 79648328 | 517  | SAT1_CF | blue   | na |
| chrUn | 79648356 | 79648986 | 631  | SAT1_CF | blue   | na |
| chrUn | 79649029 | 79649703 | 675  | SAT1_CF | blue   | na |
| chrUn | 79649715 | 79650474 | 760  | SAT1_CF | blue   | na |
| chrUn | 79650487 | 79651247 | 761  | SAT1_CF | blue   | na |
| chrUn | 79651261 | 79652746 | 1486 | SAT1_CF | blue   | na |
| chrUn | 79652772 | 79652929 | 158  | SAT1_CF | blue   | na |
| chrUn | 79652944 | 79654267 | 1324 | SAT1_CF | blue   | na |
| chrUn | 79654290 | 79654761 | 472  | SAT1_CF | blue   | na |
| chrUn | 79654838 | 79654924 | 87   | SAT1_CF | blue   | na |
| chrUn | 79655927 | 79657298 | 1372 | CarSat1 | red    | na |
| chrUn | 79657314 | 79658521 | 1208 | CarSat1 | red    | na |
| chrUn | 79658548 | 79658988 | 441  | CarSat1 | red    | na |
| chrUn | 79659018 | 79661472 | 2455 | CarSat1 | red    | na |
| chrUn | 79661499 | 79663010 | 1512 | CarSat1 | red    | na |
| chrUn | 79664069 | 79664702 | 634  | CarSat1 | red    | na |
| chrUn | 79664718 | 79666414 | 1697 | CarSat1 | red    | na |
| chrUn | 79666446 | 79666911 | 466  | CarSat1 | red    | na |
| chrUn | 79666927 | 79667648 | 722  | CarSat1 | red    | na |
| chrUn | 79667664 | 79668383 | 720  | CarSat1 | red    | na |
| chrUn | 79668399 | 79669857 | 1459 | CarSat1 | red    | na |
| chrUn | 79669873 | 79670594 | 722  | CarSat1 | red    | na |
| chrUn | 79670610 | 79671149 | 540  | CarSat1 | red    | na |
| chrUn | 79672209 | 79673112 | 904  | CarSat1 | red    | na |
| chrUn | 79673142 | 79673635 | 494  | CarSat1 | red    | na |
| chrUn | 79673651 | 79674368 | 718  | CarSat1 | red    | na |
| chrUn | 79674384 | 79674857 | 474  | CarSat1 | red    | na |
| chrUn | 79674879 | 79675587 | 709  | CarSat1 | red    | na |
| chrUn | 79675614 | 79676323 | 710  | CarSat1 | red    | na |
| chrUn | 79676350 | 79677311 | 962  | CarSat1 | red    | na |
| chrUn | 79677327 | 79678282 | 956  | CarSat1 | red    | na |

|       |          |          |      |         |        |    |
|-------|----------|----------|------|---------|--------|----|
| chrUn | 79678328 | 79679252 | 925  | CarSat1 | red    | na |
| chrUn | 79688363 | 79689438 | 1076 | CarSat1 | red    | na |
| chrUn | 79689465 | 79691154 | 1690 | CarSat1 | red    | na |
| chrUn | 79691170 | 79692619 | 1450 | CarSat1 | red    | na |
| chrUn | 79692644 | 79694318 | 1675 | CarSat1 | red    | na |
| chrUn | 79694333 | 79694460 | 128  | Carsat2 | orange | na |
| chrUn | 79694348 | 79695466 | 1119 | CarSat1 | red    | na |
| chrUn | 79696469 | 79697580 | 1112 | CarSat1 | red    | na |
| chrUn | 79697619 | 79698565 | 947  | CarSat1 | red    | na |
| chrUn | 79698592 | 79699301 | 710  | CarSat1 | red    | na |
| chrUn | 79699328 | 79703560 | 4233 | CarSat1 | red    | na |
| chrUn | 79704588 | 79705562 | 975  | CarSat1 | red    | na |
| chrUn | 79705593 | 79708030 | 2438 | CarSat1 | red    | na |
| chrUn | 79708046 | 79709506 | 1461 | CarSat1 | red    | na |
| chrUn | 79709522 | 79710728 | 1207 | CarSat1 | red    | na |
| chrUn | 79710755 | 79711667 | 913  | CarSat1 | red    | na |
| chrUn | 79712673 | 79713341 | 669  | CarSat1 | red    | na |
| chrUn | 79713357 | 79715551 | 2195 | CarSat1 | red    | na |
| chrUn | 79715567 | 79716288 | 722  | CarSat1 | red    | na |
| chrUn | 79716304 | 79717267 | 964  | CarSat1 | red    | na |
| chrUn | 79717294 | 79718004 | 711  | CarSat1 | red    | na |
| chrUn | 79718031 | 79719745 | 1715 | CarSat1 | red    | na |
| chrUn | 79724505 | 79724788 | 284  | SAT1_CF | blue   | na |
| chrUn | 79728867 | 79730178 | 1312 | CarSat1 | red    | na |
| chrUn | 79730203 | 79730923 | 721  | CarSat1 | red    | na |
| chrUn | 79730948 | 79731651 | 704  | CarSat1 | red    | na |
| chrUn | 79731676 | 79733346 | 1671 | CarSat1 | red    | na |
| chrUn | 79733376 | 79735092 | 1717 | CarSat1 | red    | na |
| chrUn | 79735119 | 79735960 | 842  | CarSat1 | red    | na |
| chrUn | 79736961 | 79737925 | 965  | CarSat1 | red    | na |
| chrUn | 79737962 | 79738940 | 979  | CarSat1 | red    | na |
| chrUn | 79738961 | 79739672 | 712  | CarSat1 | red    | na |
| chrUn | 79739703 | 79740414 | 712  | CarSat1 | red    | na |
| chrUn | 79740434 | 79741882 | 1449 | CarSat1 | red    | na |
| chrUn | 79741907 | 79742873 | 967  | CarSat1 | red    | na |
| chrUn | 79742885 | 79744051 | 1167 | CarSat1 | red    | na |
| chrUn | 79797896 | 79798484 | 589  | CarSat1 | red    | na |
| chrUn | 79798504 | 79800219 | 1716 | CarSat1 | red    | na |
| chrUn | 79800256 | 79801432 | 1177 | CarSat1 | red    | na |
| chrUn | 79801453 | 79804940 | 3488 | CarSat1 | red    | na |
| chrUn | 79805945 | 79806983 | 1039 | CarSat1 | red    | na |
| chrUn | 79807008 | 79809205 | 2198 | CarSat1 | red    | na |

|       |          |          |      |         |     |    |
|-------|----------|----------|------|---------|-----|----|
| chrUn | 79809221 | 79809933 | 713  | CarSat1 | red | na |
| chrUn | 79809958 | 79811407 | 1450 | CarSat1 | red | na |
| chrUn | 79811432 | 79812390 | 959  | CarSat1 | red | na |
| chrUn | 79812417 | 79812998 | 582  | CarSat1 | red | na |
| chrUn | 79822100 | 79822976 | 877  | CarSat1 | red | na |
| chrUn | 79822997 | 79826409 | 3413 | CarSat1 | red | na |
| chrUn | 79826434 | 79829111 | 2678 | CarSat1 | red | na |
| chrUn | 79831201 | 79831914 | 714  | CarSat1 | red | na |
| chrUn | 79832112 | 79832997 | 886  | CarSat1 | red | na |
| chrUn | 79833013 | 79834273 | 1261 | CarSat1 | red | na |
| chrUn | 79834304 | 79835892 | 1589 | CarSat1 | red | na |
| chrUn | 79835923 | 79837170 | 1248 | CarSat1 | red | na |
| chrUn | 79838170 | 79838679 | 510  | CarSat1 | red | na |
| chrUn | 79838704 | 79839424 | 721  | CarSat1 | red | na |
| chrUn | 79839440 | 79840669 | 1230 | CarSat1 | red | na |
| chrUn | 79840699 | 79841127 | 429  | CarSat1 | red | na |
| chrUn | 79841166 | 79841626 | 461  | CarSat1 | red | na |
| chrUn | 79841651 | 79842613 | 963  | CarSat1 | red | na |
| chrUn | 79842638 | 79844086 | 1449 | CarSat1 | red | na |
| chrUn | 79844113 | 79845172 | 1060 | CarSat1 | red | na |
| chrUn | 79846472 | 79848249 | 1778 | CarSat1 | red | na |
| chrUn | 79848276 | 79852422 | 4147 | CarSat1 | red | na |
| chrUn | 79852447 | 79853240 | 794  | CarSat1 | red | na |
| chrUn | 79854270 | 79854814 | 545  | CarSat1 | red | na |
| chrUn | 79854839 | 79855333 | 495  | CarSat1 | red | na |
| chrUn | 79855370 | 79856808 | 1439 | CarSat1 | red | na |
| chrUn | 79856845 | 79860223 | 3379 | CarSat1 | red | na |
| chrUn | 79860250 | 79861300 | 1051 | CarSat1 | red | na |
| chrUn | 79862340 | 79863720 | 1381 | CarSat1 | red | na |
| chrUn | 79863747 | 79865933 | 2187 | CarSat1 | red | na |
| chrUn | 79865960 | 79868397 | 2438 | CarSat1 | red | na |
| chrUn | 79868422 | 79868882 | 461  | CarSat1 | red | na |
| chrUn | 79868909 | 79869348 | 440  | CarSat1 | red | na |
| chrUn | 79878394 | 79879262 | 869  | CarSat1 | red | na |
| chrUn | 79879287 | 79882211 | 2925 | CarSat1 | red | na |
| chrUn | 79882236 | 79882938 | 703  | CarSat1 | red | na |
| chrUn | 79882963 | 79884412 | 1450 | CarSat1 | red | na |
| chrUn | 79884437 | 79885404 | 968  | CarSat1 | red | na |
| chrUn | 79886461 | 79888633 | 2173 | CarSat1 | red | na |
| chrUn | 79888658 | 79889376 | 719  | CarSat1 | red | na |
| chrUn | 79889397 | 79892068 | 2672 | CarSat1 | red | na |
| chrUn | 79892090 | 79892806 | 717  | CarSat1 | red | na |

|       |          |          |      |         |     |    |
|-------|----------|----------|------|---------|-----|----|
| chrUn | 79892833 | 79893457 | 625  | CarSat1 | red | na |
| chrUn | 79894469 | 79896730 | 2262 | CarSat1 | red | na |
| chrUn | 79896755 | 79897477 | 723  | CarSat1 | red | na |
| chrUn | 79897502 | 79898699 | 1198 | CarSat1 | red | na |
| chrUn | 79898726 | 79900173 | 1448 | CarSat1 | red | na |
| chrUn | 79900184 | 79901483 | 1300 | CarSat1 | red | na |
| chrUn | 79902500 | 79903213 | 714  | CarSat1 | red | na |
| chrUn | 79910511 | 79911443 | 933  | CarSat1 | red | na |
| chrUn | 79911588 | 79912680 | 1093 | CarSat1 | red | na |
| chrUn | 79912694 | 79913421 | 728  | CarSat1 | red | na |
| chrUn | 79913436 | 79914158 | 723  | CarSat1 | red | na |
| chrUn | 79914173 | 79917528 | 3356 | CarSat1 | red | na |
| chrUn | 79919382 | 79920926 | 1545 | CarSat1 | red | na |
| chrUn | 79926547 | 79929280 | 2734 | CarSat1 | red | na |
| chrUn | 79929296 | 79930260 | 965  | CarSat1 | red | na |
| chrUn | 79930287 | 79930755 | 469  | CarSat1 | red | na |
| chrUn | 79930771 | 79933554 | 2784 | CarSat1 | red | na |
| chrUn | 79934560 | 79936792 | 2233 | CarSat1 | red | na |
| chrUn | 79936822 | 79938496 | 1675 | CarSat1 | red | na |
| chrUn | 79938526 | 79939753 | 1228 | CarSat1 | red | na |
| chrUn | 79939777 | 79941562 | 1786 | CarSat1 | red | na |
| chrUn | 79942669 | 79943602 | 934  | CarSat1 | red | na |
| chrUn | 79943618 | 79944575 | 958  | CarSat1 | red | na |
| chrUn | 79944602 | 79945799 | 1198 | CarSat1 | red | na |
| chrUn | 79945824 | 79946542 | 719  | CarSat1 | red | na |
| chrUn | 79946558 | 79949569 | 3012 | CarSat1 | red | na |
| chrUn | 79950573 | 79951222 | 650  | CarSat1 | red | na |
| chrUn | 79951238 | 79952440 | 1203 | CarSat1 | red | na |
| chrUn | 79952461 | 79953176 | 716  | CarSat1 | red | na |
| chrUn | 79953203 | 79953914 | 712  | CarSat1 | red | na |
| chrUn | 79953941 | 79957218 | 3278 | CarSat1 | red | na |
| chrUn | 79957386 | 79957575 | 190  | CarSat1 | red | na |
| chrUn | 79958577 | 79959335 | 759  | CarSat1 | red | na |
| chrUn | 79959351 | 79960287 | 937  | CarSat1 | red | na |
| chrUn | 79960317 | 79963755 | 3439 | CarSat1 | red | na |
| chrUn | 79963771 | 79964239 | 469  | CarSat1 | red | na |
| chrUn | 79964266 | 79965572 | 1307 | CarSat1 | red | na |
| chrUn | 79966581 | 79967349 | 769  | CarSat1 | red | na |
| chrUn | 79967365 | 79968086 | 722  | CarSat1 | red | na |
| chrUn | 79968111 | 79969560 | 1450 | CarSat1 | red | na |
| chrUn | 79969576 | 79972256 | 2681 | CarSat1 | red | na |
| chrUn | 79972283 | 79973557 | 1275 | CarSat1 | red | na |

|       |          |          |      |         |        |    |
|-------|----------|----------|------|---------|--------|----|
| chrUn | 79974581 | 79978433 | 3853 | CarSat1 | red    | na |
| chrUn | 79978449 | 79979411 | 963  | CarSat1 | red    | na |
| chrUn | 79979438 | 79980645 | 1208 | CarSat1 | red    | na |
| chrUn | 79980661 | 79981573 | 913  | CarSat1 | red    | na |
| chrUn | 79982582 | 79983216 | 635  | CarSat1 | red    | na |
| chrUn | 79983232 | 79988603 | 5372 | CarSat1 | red    | na |
| chrUn | 79988630 | 79989577 | 948  | CarSat1 | red    | na |
| chrUn | 79990581 | 79992000 | 1420 | CarSat1 | red    | na |
| chrUn | 79992027 | 79993234 | 1208 | CarSat1 | red    | na |
| chrUn | 79993250 | 79993971 | 722  | CarSat1 | red    | na |
| chrUn | 79993987 | 79997568 | 3582 | CarSat1 | red    | na |
| chrUn | 80027782 | 80029392 | 1611 | CarSat1 | red    | na |
| chrUn | 80029407 | 80030129 | 723  | CarSat1 | red    | na |
| chrUn | 80030144 | 80030852 | 709  | CarSat1 | red    | na |
| chrUn | 80030882 | 80031603 | 722  | CarSat1 | red    | na |
| chrUn | 80031618 | 80032323 | 706  | CarSat1 | red    | na |
| chrUn | 80032354 | 80033801 | 1448 | CarSat1 | red    | na |
| chrUn | 80033831 | 80034756 | 926  | CarSat1 | red    | na |
| chrUn | 80035761 | 80036477 | 717  | CarSat1 | red    | na |
| chrUn | 80036502 | 80040160 | 3659 | CarSat1 | red    | na |
| chrUn | 80040185 | 80042165 | 1981 | CarSat1 | red    | na |
| chrUn | 80042188 | 80042734 | 547  | CarSat1 | red    | na |
| chrUn | 80051715 | 80053016 | 1302 | CarSat1 | red    | na |
| chrUn | 80053046 | 80053753 | 708  | CarSat1 | red    | na |
| chrUn | 80053783 | 80054487 | 705  | CarSat1 | red    | na |
| chrUn | 80054502 | 80054628 | 127  | Carsat2 | orange | na |
| chrUn | 80054517 | 80056700 | 2184 | CarSat1 | red    | na |
| chrUn | 80056730 | 80057437 | 708  | CarSat1 | red    | na |
| chrUn | 80057452 | 80057578 | 127  | Carsat2 | orange | na |
| chrUn | 80057467 | 80058688 | 1222 | CarSat1 | red    | na |
| chrUn | 80059705 | 80063445 | 3741 | CarSat1 | red    | na |
| chrUn | 80063466 | 80065896 | 2431 | CarSat1 | red    | na |
| chrUn | 80065921 | 80066643 | 723  | CarSat1 | red    | na |
| chrUn | 80078009 | 80079375 | 1367 | CarSat1 | red    | na |
| chrUn | 80079400 | 80081382 | 1983 | CarSat1 | red    | na |
| chrUn | 80081397 | 80083058 | 1662 | CarSat1 | red    | na |
| chrUn | 80083083 | 80084919 | 1837 | CarSat1 | red    | na |
| chrUn | 80093932 | 80095779 | 1848 | CarSat1 | red    | na |
| chrUn | 80095806 | 80097993 | 2188 | CarSat1 | red    | na |
| chrUn | 80098018 | 80099466 | 1449 | CarSat1 | red    | na |
| chrUn | 80099493 | 80100204 | 712  | CarSat1 | red    | na |
| chrUn | 80100231 | 80100878 | 648  | CarSat1 | red    | na |



|       |          |          |      |         |        |    |
|-------|----------|----------|------|---------|--------|----|
| chrUn | 80101883 | 80102510 | 628  | CarSat1 | red    | na |
| chrUn | 80102537 | 80103731 | 1195 | CarSat1 | red    | na |
| chrUn | 80103756 | 80106675 | 2920 | CarSat1 | red    | na |
| chrUn | 80106709 | 80107662 | 954  | CarSat1 | red    | na |
| chrUn | 80107689 | 80108827 | 1139 | CarSat1 | red    | na |
| chrUn | 80109837 | 80113286 | 3450 | CarSat1 | red    | na |
| chrUn | 80113252 | 80113408 | 157  | Carsat2 | orange | na |
| chrUn | 80113369 | 80115060 | 1692 | CarSat1 | red    | na |
| chrUn | 80115087 | 80116788 | 1702 | CarSat1 | red    | na |
| chrUn | 80125736 | 80126858 | 1123 | SAT1_CF | blue   | na |
| chrUn | 80126901 | 80128271 | 1371 | SAT1_CF | blue   | na |
| chrUn | 80128284 | 80129140 | 857  | SAT1_CF | blue   | na |
| chrUn | 80129152 | 80130377 | 1226 | SAT1_CF | blue   | na |
| chrUn | 80130447 | 80130957 | 511  | SAT1_CF | blue   | na |
| chrUn | 80131001 | 80132304 | 1304 | SAT1_CF | blue   | na |
| chrUn | 80132317 | 80132641 | 325  | SAT1_CF | blue   | na |
| chrUn | 80133679 | 80135718 | 2040 | CarSat1 | red    | na |
| chrUn | 80135755 | 80136987 | 1233 | CarSat1 | red    | na |
| chrUn | 80137012 | 80137472 | 461  | CarSat1 | red    | na |
| chrUn | 80137499 | 80138211 | 713  | CarSat1 | red    | na |
| chrUn | 80138238 | 80139683 | 1446 | CarSat1 | red    | na |
| chrUn | 80139710 | 80140588 | 879  | CarSat1 | red    | na |
| chrUn | 80149569 | 80153327 | 3759 | CarSat1 | red    | na |
| chrUn | 80153354 | 80154061 | 708  | CarSat1 | red    | na |
| chrUn | 80154085 | 80155267 | 1183 | CarSat1 | red    | na |
| chrUn | 80155297 | 80156002 | 706  | CarSat1 | red    | na |
| chrUn | 80156017 | 80156143 | 127  | Carsat2 | orange | na |
| chrUn | 80156032 | 80156505 | 474  | CarSat1 | red    | na |
| chrUn | 80181308 | 80182619 | 1312 | CarSat1 | red    | na |
| chrUn | 80182649 | 80183089 | 441  | CarSat1 | red    | na |
| chrUn | 80183116 | 80183827 | 712  | CarSat1 | red    | na |
| chrUn | 80183858 | 80184323 | 466  | CarSat1 | red    | na |
| chrUn | 80184349 | 80185569 | 1221 | CarSat1 | red    | na |
| chrUn | 80185599 | 80186038 | 440  | CarSat1 | red    | na |
| chrUn | 80186065 | 80186776 | 712  | CarSat1 | red    | na |
| chrUn | 80186803 | 80187271 | 469  | CarSat1 | red    | na |
| chrUn | 80187296 | 80188231 | 936  | CarSat1 | red    | na |
| chrUn | 80189300 | 80193957 | 4658 | CarSat1 | red    | na |
| chrUn | 80193972 | 80196153 | 2182 | CarSat1 | red    | na |
| chrUn | 80197158 | 80197903 | 746  | CarSat1 | red    | na |
| chrUn | 80197933 | 80198537 | 605  | CarSat1 | red    | na |
| chrUn | 80198781 | 80200346 | 1566 | CarSat1 | red    | na |

|       |          |          |      |         |        |    |
|-------|----------|----------|------|---------|--------|----|
| chrUn | 80200623 | 80201633 | 1011 | CarSat1 | red    | na |
| chrUn | 80201663 | 80202846 | 1184 | CarSat1 | red    | na |
| chrUn | 80204684 | 80205777 | 1094 | CarSat1 | red    | na |
| chrUn | 80205804 | 80206406 | 603  | CarSat1 | red    | na |
| chrUn | 80215330 | 80215429 | 100  | Carsat2 | orange | na |
| chrUn | 80215348 | 80216981 | 1634 | CarSat1 | red    | na |
| chrUn | 80217006 | 80218201 | 1196 | CarSat1 | red    | na |
| chrUn | 80218228 | 80219676 | 1449 | CarSat1 | red    | na |
| chrUn | 80219703 | 80220410 | 708  | CarSat1 | red    | na |
| chrUn | 80220437 | 80221398 | 962  | CarSat1 | red    | na |
| chrUn | 80221414 | 80222231 | 818  | CarSat1 | red    | na |
| chrUn | 80223247 | 80225900 | 2654 | CarSat1 | red    | na |
| chrUn | 80225921 | 80226629 | 709  | CarSat1 | red    | na |
| chrUn | 80226656 | 80227710 | 1055 | CarSat1 | red    | na |
| chrUn | 80227893 | 80229042 | 1150 | CarSat1 | red    | na |
| chrUn | 80229069 | 80230139 | 1071 | CarSat1 | red    | na |
| chrUn | 80231158 | 80231941 | 784  | CarSat1 | red    | na |
| chrUn | 80231957 | 80233414 | 1458 | CarSat1 | red    | na |
| chrUn | 80233430 | 80235617 | 2188 | CarSat1 | red    | na |
| chrUn | 80235633 | 80236355 | 723  | CarSat1 | red    | na |
| chrUn | 80236371 | 80238059 | 1689 | CarSat1 | red    | na |
| chrUn | 80239069 | 80240997 | 1929 | CarSat1 | red    | na |
| chrUn | 80241013 | 80242491 | 1479 | CarSat1 | red    | na |
| chrUn | 80242507 | 80243712 | 1206 | CarSat1 | red    | na |
| chrUn | 80243739 | 80244701 | 963  | CarSat1 | red    | na |
| chrUn | 80244717 | 80245977 | 1261 | CarSat1 | red    | na |
| chrUn | 80246977 | 80247766 | 790  | CarSat1 | red    | na |
| chrUn | 80247793 | 80248504 | 712  | CarSat1 | red    | na |
| chrUn | 80248531 | 80249494 | 964  | CarSat1 | red    | na |
| chrUn | 80249510 | 80249979 | 470  | CarSat1 | red    | na |
| chrUn | 80250006 | 80251706 | 1701 | CarSat1 | red    | na |
| chrUn | 80251722 | 80253878 | 2157 | CarSat1 | red    | na |
| chrUn | 80254906 | 80255328 | 423  | CarSat1 | red    | na |
| chrUn | 80255359 | 80256947 | 1589 | CarSat1 | red    | na |
| chrUn | 80256978 | 80258566 | 1589 | CarSat1 | red    | na |
| chrUn | 80258597 | 80260182 | 1586 | CarSat1 | red    | na |
| chrUn | 80260213 | 80261793 | 1581 | CarSat1 | red    | na |
| chrUn | 80262794 | 80263590 | 797  | CarSat1 | red    | na |
| chrUn | 80263617 | 80264328 | 712  | CarSat1 | red    | na |
| chrUn | 80264355 | 80265065 | 711  | CarSat1 | red    | na |
| chrUn | 80265092 | 80266543 | 1452 | CarSat1 | red    | na |
| chrUn | 80266564 | 80267542 | 979  | CarSat1 | red    | na |

|       |          |          |      |         |     |    |
|-------|----------|----------|------|---------|-----|----|
| chrUn | 80267572 | 80268279 | 708  | CarSat1 | red | na |
| chrUn | 80268309 | 80269015 | 707  | CarSat1 | red | na |
| chrUn | 80269045 | 80269686 | 642  | CarSat1 | red | na |
| chrUn | 80270703 | 80271354 | 652  | CarSat1 | red | na |
| chrUn | 80271375 | 80271835 | 461  | CarSat1 | red | na |
| chrUn | 80271860 | 80272824 | 965  | CarSat1 | red | na |
| chrUn | 80272851 | 80274304 | 1454 | CarSat1 | red | na |
| chrUn | 80274325 | 80275042 | 718  | CarSat1 | red | na |
| chrUn | 80275063 | 80275773 | 711  | CarSat1 | red | na |
| chrUn | 80275800 | 80276516 | 717  | CarSat1 | red | na |
| chrUn | 80276537 | 80277598 | 1062 | CarSat1 | red | na |
| chrUn | 80286507 | 80287186 | 680  | CarSat1 | red | na |
| chrUn | 80287211 | 80287913 | 703  | CarSat1 | red | na |
| chrUn | 80287938 | 80288660 | 723  | CarSat1 | red | na |
| chrUn | 80288685 | 80289645 | 961  | CarSat1 | red | na |
| chrUn | 80289666 | 80290134 | 469  | CarSat1 | red | na |
| chrUn | 80290159 | 80291855 | 1697 | CarSat1 | red | na |
| chrUn | 80291876 | 80293407 | 1532 | CarSat1 | red | na |
| chrUn | 80302318 | 80303495 | 1178 | CarSat1 | red | na |
| chrUn | 80303525 | 80304964 | 1440 | CarSat1 | red | na |
| chrUn | 80304994 | 80306432 | 1439 | CarSat1 | red | na |
| chrUn | 80306462 | 80307167 | 706  | CarSat1 | red | na |
| chrUn | 80307197 | 80307900 | 704  | CarSat1 | red | na |
| chrUn | 80307929 | 80309211 | 1283 | CarSat1 | red | na |
| chrUn | 80310241 | 80311828 | 1588 | CarSat1 | red | na |
| chrUn | 80311849 | 80313299 | 1451 | CarSat1 | red | na |
| chrUn | 80313320 | 80314034 | 715  | CarSat1 | red | na |
| chrUn | 80314061 | 80316244 | 2184 | CarSat1 | red | na |
| chrUn | 80316271 | 80317066 | 796  | CarSat1 | red | na |
| chrUn | 80325999 | 80327067 | 1069 | CarSat1 | red | na |
| chrUn | 80327094 | 80327805 | 712  | CarSat1 | red | na |
| chrUn | 80327832 | 80330750 | 2919 | CarSat1 | red | na |
| chrUn | 80330777 | 80332874 | 2098 | CarSat1 | red | na |
| chrUn | 80333925 | 80336610 | 2686 | CarSat1 | red | na |
| chrUn | 80336637 | 80337347 | 711  | CarSat1 | red | na |
| chrUn | 80337374 | 80337843 | 470  | CarSat1 | red | na |
| chrUn | 80337868 | 80339559 | 1692 | CarSat1 | red | na |
| chrUn | 80339586 | 80340774 | 1189 | CarSat1 | red | na |
| chrUn | 80341779 | 80343121 | 1343 | CarSat1 | red | na |
| chrUn | 80343146 | 80343858 | 713  | CarSat1 | red | na |
| chrUn | 80343874 | 80345853 | 1980 | CarSat1 | red | na |
| chrUn | 80345869 | 80348658 | 2790 | CarSat1 | red | na |

|       |          |          |      |         |        |    |
|-------|----------|----------|------|---------|--------|----|
| chrUn | 80349665 | 80351206 | 1542 | CarSat1 | red    | na |
| chrUn | 80351236 | 80351940 | 705  | CarSat1 | red    | na |
| chrUn | 80351972 | 80353436 | 1465 | CarSat1 | red    | na |
| chrUn | 80353451 | 80354391 | 941  | CarSat1 | red    | na |
| chrUn | 80354415 | 80355388 | 974  | CarSat1 | red    | na |
| chrUn | 80355399 | 80356540 | 1142 | CarSat1 | red    | na |
| chrUn | 80358607 | 80359036 | 430  | SAT1_CF | blue   | na |
| chrUn | 80363596 | 80364310 | 715  | Sat2CF  | purple | na |
| chrUn | 80365419 | 80366541 | 1123 | CarSat1 | red    | na |
| chrUn | 80366568 | 80371442 | 4875 | CarSat1 | red    | na |
| chrUn | 80371458 | 80371584 | 127  | Carsat2 | orange | na |
| chrUn | 80371472 | 80372292 | 821  | CarSat1 | red    | na |
| chrUn | 80373297 | 80374135 | 839  | CarSat1 | red    | na |
| chrUn | 80374162 | 80375336 | 1175 | CarSat1 | red    | na |
| chrUn | 80375366 | 80376344 | 979  | CarSat1 | red    | na |
| chrUn | 80376371 | 80380161 | 3791 | CarSat1 | red    | na |
| chrUn | 80381170 | 80381779 | 610  | CarSat1 | red    | na |
| chrUn | 80381804 | 80383991 | 2188 | CarSat1 | red    | na |
| chrUn | 80384016 | 80387433 | 3418 | CarSat1 | red    | na |
| chrUn | 80387458 | 80388039 | 582  | CarSat1 | red    | na |
| chrUn | 80389040 | 80390343 | 1304 | CarSat1 | red    | na |
| chrUn | 80390370 | 80391818 | 1449 | CarSat1 | red    | na |
| chrUn | 80391845 | 80392555 | 711  | CarSat1 | red    | na |
| chrUn | 80392582 | 80393292 | 711  | CarSat1 | red    | na |
| chrUn | 80393319 | 80395907 | 2589 | CarSat1 | red    | na |
| chrUn | 80404822 | 80405612 | 791  | CarSat1 | red    | na |
| chrUn | 80405627 | 80405754 | 128  | Carsat2 | orange | na |
| chrUn | 80405642 | 80406620 | 979  | CarSat1 | red    | na |
| chrUn | 80406647 | 80407358 | 712  | CarSat1 | red    | na |
| chrUn | 80407385 | 80407824 | 440  | CarSat1 | red    | na |
| chrUn | 80407839 | 80407966 | 128  | Carsat2 | orange | na |
| chrUn | 80407854 | 80408554 | 701  | CarSat1 | red    | na |
| chrUn | 80408590 | 80409296 | 707  | CarSat1 | red    | na |
| chrUn | 80409311 | 80409438 | 128  | Carsat2 | orange | na |
| chrUn | 80409326 | 80410304 | 979  | CarSat1 | red    | na |
| chrUn | 80410331 | 80411624 | 1294 | CarSat1 | red    | na |
| chrUn | 80436604 | 80437300 | 697  | SAT1_CF | blue   | na |
| chrUn | 80437312 | 80438436 | 1125 | SAT1_CF | blue   | na |
| chrUn | 80438461 | 80438785 | 325  | SAT1_CF | blue   | na |
| chrUn | 80438864 | 80439405 | 542  | SAT1_CF | blue   | na |
| chrUn | 80439456 | 80440155 | 700  | SAT1_CF | blue   | na |
| chrUn | 80440167 | 80441201 | 1035 | SAT1_CF | blue   | na |

|       |          |          |      |         |        |    |
|-------|----------|----------|------|---------|--------|----|
| chrUn | 80441252 | 80441788 | 537  | SAT1_CF | blue   | na |
| chrUn | 80444436 | 80445357 | 922  | CarSat1 | red    | na |
| chrUn | 80445372 | 80446301 | 930  | CarSat1 | red    | na |
| chrUn | 80446334 | 80449768 | 3435 | CarSat1 | red    | na |
| chrUn | 80449798 | 80450243 | 446  | CarSat1 | red    | na |
| chrUn | 80450264 | 80451058 | 795  | CarSat1 | red    | na |
| chrUn | 80460136 | 80462004 | 1869 | CarSat1 | red    | na |
| chrUn | 80462025 | 80463228 | 1204 | CarSat1 | red    | na |
| chrUn | 80463253 | 80464690 | 1438 | CarSat1 | red    | na |
| chrUn | 80464715 | 80465437 | 723  | CarSat1 | red    | na |
| chrUn | 80465462 | 80466982 | 1521 | CarSat1 | red    | na |
| chrUn | 80468027 | 80468545 | 519  | CarSat1 | red    | na |
| chrUn | 80468572 | 80474204 | 5633 | CarSat1 | red    | na |
| chrUn | 80474225 | 80474825 | 601  | CarSat1 | red    | na |
| chrUn | 80483685 | 80484083 | 399  | CarSat1 | red    | na |
| chrUn | 80484290 | 80484390 | 101  | CarSat1 | red    | na |
| chrUn | 80484408 | 80486140 | 1733 | CarSat1 | red    | na |
| chrUn | 80486162 | 80490506 | 4345 | CarSat1 | red    | na |
| chrUn | 80511680 | 80512615 | 936  | CarSat1 | red    | na |
| chrUn | 80512645 | 80513367 | 723  | CarSat1 | red    | na |
| chrUn | 80513382 | 80514105 | 724  | CarSat1 | red    | na |
| chrUn | 80514120 | 80514840 | 721  | CarSat1 | red    | na |
| chrUn | 80514855 | 80517802 | 2948 | CarSat1 | red    | na |
| chrUn | 80517817 | 80518514 | 698  | CarSat1 | red    | na |
| chrUn | 80519514 | 80521924 | 2411 | CarSat1 | red    | na |
| chrUn | 80521954 | 80522394 | 441  | CarSat1 | red    | na |
| chrUn | 80522421 | 80523401 | 981  | CarSat1 | red    | na |
| chrUn | 80523431 | 80524136 | 706  | CarSat1 | red    | na |
| chrUn | 80524166 | 80525344 | 1179 | CarSat1 | red    | na |
| chrUn | 80525371 | 80526347 | 977  | CarSat1 | red    | na |
| chrUn | 80527350 | 80530610 | 3261 | CarSat1 | red    | na |
| chrUn | 80530637 | 80533555 | 2919 | CarSat1 | red    | na |
| chrUn | 80533582 | 80534182 | 601  | CarSat1 | red    | na |
| chrUn | 80535213 | 80535781 | 569  | CarSat1 | red    | na |
| chrUn | 80535811 | 80536519 | 709  | CarSat1 | red    | na |
| chrUn | 80536551 | 80537256 | 706  | CarSat1 | red    | na |
| chrUn | 80537271 | 80537397 | 127  | Carsat2 | orange | na |
| chrUn | 80537286 | 80537993 | 708  | CarSat1 | red    | na |
| chrUn | 80538023 | 80538735 | 713  | CarSat1 | red    | na |
| chrUn | 80538750 | 80538876 | 127  | Carsat2 | orange | na |
| chrUn | 80538765 | 80539989 | 1225 | CarSat1 | red    | na |
| chrUn | 80540021 | 80541221 | 1201 | CarSat1 | red    | na |

|       |          |          |      |         |      |    |
|-------|----------|----------|------|---------|------|----|
| chrUn | 80541248 | 80541923 | 676  | CarSat1 | red  | na |
| chrUn | 80543024 | 80544039 | 1016 | CarSat1 | red  | na |
| chrUn | 80544064 | 80547722 | 3659 | CarSat1 | red  | na |
| chrUn | 80547747 | 80548458 | 712  | CarSat1 | red  | na |
| chrUn | 80548483 | 80549838 | 1356 | CarSat1 | red  | na |
| chrUn | 80550881 | 80551891 | 1011 | CarSat1 | red  | na |
| chrUn | 80551921 | 80552900 | 980  | CarSat1 | red  | na |
| chrUn | 80552927 | 80553878 | 952  | CarSat1 | red  | na |
| chrUn | 80553903 | 80557660 | 3758 | CarSat1 | red  | na |
| chrUn | 80558660 | 80561514 | 2855 | CarSat1 | red  | na |
| chrUn | 80561541 | 80562250 | 710  | CarSat1 | red  | na |
| chrUn | 80562277 | 80564721 | 2445 | CarSat1 | red  | na |
| chrUn | 80564737 | 80565458 | 722  | CarSat1 | red  | na |
| chrUn | 80566479 | 80566611 | 133  | SAT1_CF | blue | na |
| chrUn | 80566633 | 80568805 | 2173 | SAT1_CF | blue | na |
| chrUn | 80568826 | 80569433 | 608  | SAT1_CF | blue | na |
| chrUn | 80569447 | 80569622 | 176  | SAT1_CF | blue | na |
| chrUn | 80569651 | 80570172 | 522  | SAT1_CF | blue | na |
| chrUn | 80570185 | 80571476 | 1292 | SAT1_CF | blue | na |
| chrUn | 80571519 | 80572150 | 632  | SAT1_CF | blue | na |
| chrUn | 80572178 | 80573293 | 1116 | SAT1_CF | blue | na |
| chrUn | 80582108 | 80584049 | 1942 | CarSat1 | red  | na |
| chrUn | 80584065 | 80584785 | 721  | CarSat1 | red  | na |
| chrUn | 80584801 | 80585269 | 469  | CarSat1 | red  | na |
| chrUn | 80585294 | 80586004 | 711  | CarSat1 | red  | na |
| chrUn | 80586031 | 80586740 | 710  | CarSat1 | red  | na |
| chrUn | 80586765 | 80587475 | 711  | CarSat1 | red  | na |
| chrUn | 80587502 | 80588877 | 1376 | CarSat1 | red  | na |
| chrUn | 80589961 | 80592655 | 2695 | CarSat1 | red  | na |
| chrUn | 80592685 | 80594862 | 2178 | CarSat1 | red  | na |
| chrUn | 80594892 | 80596063 | 1172 | CarSat1 | red  | na |
| chrUn | 80596090 | 80596730 | 641  | CarSat1 | red  | na |
| chrUn | 80605552 | 80606664 | 1113 | CarSat1 | red  | na |
| chrUn | 80606691 | 80607401 | 711  | CarSat1 | red  | na |
| chrUn | 80607428 | 80609609 | 2182 | CarSat1 | red  | na |
| chrUn | 80609630 | 80611819 | 2190 | CarSat1 | red  | na |
| chrUn | 80611846 | 80612338 | 493  | CarSat1 | red  | na |
| chrUn | 80613363 | 80614801 | 1439 | CarSat1 | red  | na |
| chrUn | 80614834 | 80615760 | 927  | CarSat1 | red  | na |
| chrUn | 80615790 | 80620153 | 4364 | CarSat1 | red  | na |
| chrUn | 80621189 | 80621900 | 712  | CarSat1 | red  | na |
| chrUn | 80621927 | 80624599 | 2673 | CarSat1 | red  | na |

|       |          |          |      |         |     |    |
|-------|----------|----------|------|---------|-----|----|
| chrUn | 80624624 | 80626323 | 1700 | CarSat1 | red | na |
| chrUn | 80626350 | 80627934 | 1585 | CarSat1 | red | na |
| chrUn | 80628963 | 80629976 | 1014 | CarSat1 | red | na |
| chrUn | 80630006 | 80630714 | 709  | CarSat1 | red | na |
| chrUn | 80630743 | 80631721 | 979  | CarSat1 | red | na |
| chrUn | 80631742 | 80632713 | 972  | CarSat1 | red | na |
| chrUn | 80632738 | 80633439 | 702  | CarSat1 | red | na |
| chrUn | 80633464 | 80634913 | 1450 | CarSat1 | red | na |
| chrUn | 80634947 | 80635756 | 810  | CarSat1 | red | na |
| chrUn | 80636763 | 80637782 | 1020 | CarSat1 | red | na |
| chrUn | 80637806 | 80638518 | 713  | CarSat1 | red | na |
| chrUn | 80638534 | 80639496 | 963  | CarSat1 | red | na |
| chrUn | 80639523 | 80640502 | 980  | CarSat1 | red | na |
| chrUn | 80640532 | 80641468 | 937  | CarSat1 | red | na |
| chrUn | 80641484 | 80642447 | 964  | CarSat1 | red | na |
| chrUn | 80642472 | 80643557 | 1086 | CarSat1 | red | na |
| chrUn | 80644563 | 80645915 | 1353 | CarSat1 | red | na |
| chrUn | 80645931 | 80648125 | 2195 | CarSat1 | red | na |
| chrUn | 80648150 | 80649075 | 926  | CarSat1 | red | na |
| chrUn | 80649110 | 80650084 | 975  | CarSat1 | red | na |
| chrUn | 80650111 | 80651362 | 1252 | CarSat1 | red | na |
| chrUn | 80660204 | 80661733 | 1530 | CarSat1 | red | na |
| chrUn | 80661763 | 80663201 | 1439 | CarSat1 | red | na |
| chrUn | 80663235 | 80663672 | 438  | CarSat1 | red | na |
| chrUn | 80663693 | 80665875 | 2183 | CarSat1 | red | na |
| chrUn | 80665896 | 80666840 | 945  | CarSat1 | red | na |
| chrUn | 80667948 | 80668912 | 965  | CarSat1 | red | na |
| chrUn | 80668937 | 80669898 | 962  | CarSat1 | red | na |
| chrUn | 80669925 | 80670634 | 710  | CarSat1 | red | na |
| chrUn | 80670661 | 80672109 | 1449 | CarSat1 | red | na |
| chrUn | 80672136 | 80673114 | 979  | CarSat1 | red | na |
| chrUn | 80673144 | 80674080 | 937  | CarSat1 | red | na |
| chrUn | 80674096 | 80674732 | 637  | CarSat1 | red | na |
| chrUn | 80675768 | 80676469 | 702  | CarSat1 | red | na |
| chrUn | 80676506 | 80677482 | 977  | CarSat1 | red | na |
| chrUn | 80677509 | 80680431 | 2923 | CarSat1 | red | na |
| chrUn | 80680458 | 80681626 | 1169 | CarSat1 | red | na |
| chrUn | 80681663 | 80682516 | 854  | CarSat1 | red | na |
| chrUn | 80691324 | 80693648 | 2325 | CarSat1 | red | na |
| chrUn | 80693678 | 80694860 | 1183 | CarSat1 | red | na |
| chrUn | 80694881 | 80695590 | 710  | CarSat1 | red | na |
| chrUn | 80695617 | 80698066 | 2450 | CarSat1 | red | na |

|       |          |          |      |         |     |    |
|-------|----------|----------|------|---------|-----|----|
| chrUn | 80699196 | 80699821 | 626  | CarSat1 | red | na |
| chrUn | 80699858 | 80700832 | 975  | CarSat1 | red | na |
| chrUn | 80700865 | 80701574 | 710  | CarSat1 | red | na |
| chrUn | 80701601 | 80702312 | 712  | CarSat1 | red | na |
| chrUn | 80702339 | 80704521 | 2183 | CarSat1 | red | na |
| chrUn | 80704548 | 80705854 | 1307 | CarSat1 | red | na |
| chrUn | 80706866 | 80708307 | 1442 | CarSat1 | red | na |
| chrUn | 80708322 | 80711475 | 3154 | CarSat1 | red | na |
| chrUn | 80711500 | 80713627 | 2128 | CarSat1 | red | na |
| chrUn | 80714640 | 80715508 | 869  | CarSat1 | red | na |
| chrUn | 80715533 | 80716235 | 703  | CarSat1 | red | na |
| chrUn | 80716260 | 80716971 | 712  | CarSat1 | red | na |
| chrUn | 80716996 | 80718452 | 1457 | CarSat1 | red | na |
| chrUn | 80718478 | 80719918 | 1441 | CarSat1 | red | na |
| chrUn | 80719943 | 80721270 | 1328 | CarSat1 | red | na |
| chrUn | 80737917 | 80738486 | 570  | CarSat1 | red | na |
| chrUn | 80738511 | 80739707 | 1197 | CarSat1 | red | na |
| chrUn | 80739734 | 80740446 | 713  | CarSat1 | red | na |
| chrUn | 80740465 | 80742161 | 1697 | CarSat1 | red | na |
| chrUn | 80742186 | 80742900 | 715  | CarSat1 | red | na |
| chrUn | 80742925 | 80743389 | 465  | CarSat1 | red | na |
| chrUn | 80743429 | 80744669 | 1241 | CarSat1 | red | na |
| chrUn | 80753431 | 80754022 | 592  | CarSat1 | red | na |
| chrUn | 80754043 | 80759464 | 5422 | CarSat1 | red | na |
| chrUn | 80759479 | 80759885 | 407  | CarSat1 | red | na |
| chrUn | 80761164 | 80763184 | 2021 | CarSat1 | red | na |
| chrUn | 80763205 | 80764172 | 968  | CarSat1 | red | na |
| chrUn | 80764197 | 80764657 | 461  | CarSat1 | red | na |
| chrUn | 80764678 | 80765392 | 715  | CarSat1 | red | na |
| chrUn | 80765413 | 80766130 | 718  | CarSat1 | red | na |
| chrUn | 80766151 | 80767900 | 1750 | CarSat1 | red | na |
| chrUn | 80776646 | 80777400 | 755  | CarSat1 | red | na |
| chrUn | 80777415 | 80778122 | 708  | CarSat1 | red | na |
| chrUn | 80778152 | 80778644 | 493  | CarSat1 | red | na |
| chrUn | 80778823 | 80779815 | 993  | CarSat1 | red | na |
| chrUn | 80779845 | 80780291 | 447  | CarSat1 | red | na |
| chrUn | 80780337 | 80781289 | 953  | CarSat1 | red | na |
| chrUn | 80781326 | 80782253 | 928  | CarSat1 | red | na |
| chrUn | 80782278 | 80783363 | 1086 | CarSat1 | red | na |
| chrUn | 80792108 | 80794631 | 2524 | CarSat1 | red | na |
| chrUn | 80794647 | 80795367 | 721  | CarSat1 | red | na |
| chrUn | 80795383 | 80796343 | 961  | CarSat1 | red | na |



|       |          |          |      |         |        |    |
|-------|----------|----------|------|---------|--------|----|
| chrUn | 80796370 | 80797569 | 1200 | CarSat1 | red    | na |
| chrUn | 80797594 | 80798306 | 713  | CarSat1 | red    | na |
| chrUn | 80798331 | 80798825 | 495  | CarSat1 | red    | na |
| chrUn | 80819893 | 80820815 | 923  | CarSat1 | red    | na |
| chrUn | 80820842 | 80821834 | 993  | CarSat1 | red    | na |
| chrUn | 80821849 | 80823026 | 1178 | CarSat1 | red    | na |
| chrUn | 80823053 | 80825519 | 2467 | CarSat1 | red    | na |
| chrUn | 80825536 | 80825975 | 440  | CarSat1 | red    | na |
| chrUn | 80826002 | 80826601 | 600  | CarSat1 | red    | na |
| chrUn | 80835322 | 80836860 | 1539 | CarSat1 | red    | na |
| chrUn | 80836876 | 80837597 | 722  | CarSat1 | red    | na |
| chrUn | 80837613 | 80838334 | 722  | CarSat1 | red    | na |
| chrUn | 80838350 | 80840051 | 1702 | CarSat1 | red    | na |
| chrUn | 80840078 | 80840547 | 470  | CarSat1 | red    | na |
| chrUn | 80840563 | 80842021 | 1459 | CarSat1 | red    | na |
| chrUn | 80858449 | 80860311 | 1863 | CarSat1 | red    | na |
| chrUn | 80860327 | 80861784 | 1458 | CarSat1 | red    | na |
| chrUn | 80861800 | 80863254 | 1455 | CarSat1 | red    | na |
| chrUn | 80863270 | 80863992 | 723  | CarSat1 | red    | na |
| chrUn | 80864008 | 80865139 | 1132 | CarSat1 | red    | na |
| chrUn | 80873863 | 80874357 | 495  | CarSat1 | red    | na |
| chrUn | 80874373 | 80874841 | 469  | CarSat1 | red    | na |
| chrUn | 80874868 | 80875580 | 713  | CarSat1 | red    | na |
| chrUn | 80875605 | 80876781 | 1177 | CarSat1 | red    | na |
| chrUn | 80876796 | 80876923 | 128  | Carsat2 | orange | na |
| chrUn | 80876811 | 80877305 | 495  | CarSat1 | red    | na |
| chrUn | 80877321 | 80878042 | 722  | CarSat1 | red    | na |
| chrUn | 80878058 | 80878780 | 723  | CarSat1 | red    | na |
| chrUn | 80878796 | 80880500 | 1705 | CarSat1 | red    | na |
| chrUn | 80881531 | 80882574 | 1044 | CarSat1 | red    | na |
| chrUn | 80882590 | 80884277 | 1688 | CarSat1 | red    | na |
| chrUn | 80884315 | 80887491 | 3177 | CarSat1 | red    | na |
| chrUn | 80887518 | 80888218 | 701  | CarSat1 | red    | na |
| chrUn | 80889227 | 80889780 | 554  | CarSat1 | red    | na |
| chrUn | 80889810 | 80891775 | 1966 | CarSat1 | red    | na |
| chrUn | 80891791 | 80893250 | 1460 | CarSat1 | red    | na |
| chrUn | 80893276 | 80895907 | 2632 | CarSat1 | red    | na |
| chrUn | 80896922 | 80898144 | 1223 | CarSat1 | red    | na |
| chrUn | 80898174 | 80898882 | 709  | CarSat1 | red    | na |
| chrUn | 80898913 | 80899847 | 935  | CarSat1 | red    | na |
| chrUn | 80899871 | 80901832 | 1962 | CarSat1 | red    | na |
| chrUn | 80901862 | 80902802 | 941  | CarSat1 | red    | na |

|       |          |          |      |         |     |    |
|-------|----------|----------|------|---------|-----|----|
| chrUn | 80902826 | 80903593 | 768  | CarSat1 | red | na |
| chrUn | 80912300 | 80912887 | 588  | CarSat1 | red | na |
| chrUn | 80912914 | 80913892 | 979  | CarSat1 | red | na |
| chrUn | 80913922 | 80915835 | 1914 | CarSat1 | red | na |
| chrUn | 80915862 | 80916841 | 980  | CarSat1 | red | na |
| chrUn | 80916871 | 80918875 | 2005 | CarSat1 | red | na |
| chrUn | 80919981 | 80920715 | 735  | CarSat1 | red | na |
| chrUn | 80920731 | 80922927 | 2197 | CarSat1 | red | na |
| chrUn | 80922943 | 80925875 | 2933 | CarSat1 | red | na |
| chrUn | 80925891 | 80926613 | 723  | CarSat1 | red | na |
| chrUn | 80927649 | 80929158 | 1510 | CarSat1 | red | na |
| chrUn | 80929185 | 80929654 | 470  | CarSat1 | red | na |
| chrUn | 80929680 | 80930634 | 955  | CarSat1 | red | na |
| chrUn | 80930661 | 80931371 | 711  | CarSat1 | red | na |
| chrUn | 80931398 | 80932108 | 711  | CarSat1 | red | na |
| chrUn | 80932135 | 80932845 | 711  | CarSat1 | red | na |
| chrUn | 80932872 | 80933581 | 710  | CarSat1 | red | na |
| chrUn | 80933608 | 80934316 | 709  | CarSat1 | red | na |
| chrUn | 80935327 | 80939158 | 3832 | CarSat1 | red | na |
| chrUn | 80939175 | 80941160 | 1986 | CarSat1 | red | na |
| chrUn | 80941175 | 80941988 | 814  | CarSat1 | red | na |
| chrUn | 80943009 | 80948874 | 5866 | CarSat1 | red | na |
| chrUn | 80948899 | 80949662 | 764  | CarSat1 | red | na |
| chrUn | 80950742 | 80951833 | 1092 | CarSat1 | red | na |
| chrUn | 80951863 | 80952303 | 441  | CarSat1 | red | na |
| chrUn | 80952330 | 80953309 | 980  | CarSat1 | red | na |
| chrUn | 80953339 | 80954062 | 724  | CarSat1 | red | na |
| chrUn | 80954077 | 80955013 | 937  | CarSat1 | red | na |
| chrUn | 80955038 | 80956257 | 1220 | CarSat1 | red | na |
| chrUn | 80956287 | 80957297 | 1011 | CarSat1 | red | na |
| chrUn | 80966004 | 80967531 | 1528 | CarSat1 | red | na |
| chrUn | 80967561 | 80970014 | 2454 | CarSat1 | red | na |
| chrUn | 80970041 | 80971945 | 1905 | CarSat1 | red | na |
| chrUn | 80971975 | 80972661 | 687  | CarSat1 | red | na |
| chrUn | 80973672 | 80974798 | 1127 | CarSat1 | red | na |
| chrUn | 80974823 | 80975289 | 467  | CarSat1 | red | na |
| chrUn | 80975314 | 80976267 | 954  | CarSat1 | red | na |
| chrUn | 80976294 | 80978739 | 2446 | CarSat1 | red | na |
| chrUn | 80978776 | 80980332 | 1557 | CarSat1 | red | na |
| chrUn | 80988995 | 80990384 | 1390 | CarSat1 | red | na |
| chrUn | 80990411 | 80992598 | 2188 | CarSat1 | red | na |
| chrUn | 80992625 | 80995647 | 3023 | CarSat1 | red | na |

|       |          |          |      |         |        |    |
|-------|----------|----------|------|---------|--------|----|
| chrUn | 80996677 | 80997352 | 676  | CarSat1 | red    | na |
| chrUn | 80997379 | 81000057 | 2679 | CarSat1 | red    | na |
| chrUn | 81000073 | 81001034 | 962  | CarSat1 | red    | na |
| chrUn | 81001061 | 81002773 | 1713 | CarSat1 | red    | na |
| chrUn | 81002803 | 81003301 | 499  | CarSat1 | red    | na |
| chrUn | 81004372 | 81005082 | 711  | CarSat1 | red    | na |
| chrUn | 81005109 | 81005851 | 743  | CarSat1 | red    | na |
| chrUn | 81005902 | 81006612 | 711  | CarSat1 | red    | na |
| chrUn | 81006639 | 81007368 | 730  | CarSat1 | red    | na |
| chrUn | 81007542 | 81008558 | 1017 | CarSat1 | red    | na |
| chrUn | 81008574 | 81009296 | 723  | CarSat1 | red    | na |
| chrUn | 81009312 | 81010901 | 1590 | CarSat1 | red    | na |
| chrUn | 81011951 | 81012620 | 670  | CarSat1 | red    | na |
| chrUn | 81012635 | 81012760 | 126  | Carsat2 | orange | na |
| chrUn | 81012650 | 81014097 | 1448 | CarSat1 | red    | na |
| chrUn | 81014113 | 81014238 | 126  | Carsat2 | orange | na |
| chrUn | 81014126 | 81015569 | 1444 | CarSat1 | red    | na |
| chrUn | 81015580 | 81015710 | 131  | Carsat2 | orange | na |
| chrUn | 81015599 | 81017766 | 2168 | CarSat1 | red    | na |
| chrUn | 81017800 | 81018593 | 794  | CarSat1 | red    | na |
| chrUn | 81019613 | 81021956 | 2344 | CarSat1 | red    | na |
| chrUn | 81021971 | 81023417 | 1447 | CarSat1 | red    | na |
| chrUn | 81023447 | 81024369 | 923  | CarSat1 | red    | na |
| chrUn | 81024403 | 81025643 | 1241 | CarSat1 | red    | na |
| chrUn | 81025658 | 81026229 | 572  | CarSat1 | red    | na |
| chrUn | 81035128 | 81036033 | 906  | Carsat2 | orange | na |
| chrUn | 81051216 | 81052037 | 822  | CarSat1 | red    | na |
| chrUn | 81052067 | 81052789 | 723  | CarSat1 | red    | na |
| chrUn | 81052804 | 81054477 | 1674 | CarSat1 | red    | na |
| chrUn | 81054502 | 81055464 | 963  | CarSat1 | red    | na |
| chrUn | 81055485 | 81056201 | 717  | CarSat1 | red    | na |
| chrUn | 81056222 | 81057839 | 1618 | CarSat1 | red    | na |
| chrUn | 81058841 | 81059787 | 947  | CarSat1 | red    | na |
| chrUn | 81059808 | 81060524 | 717  | CarSat1 | red    | na |
| chrUn | 81060551 | 81060991 | 441  | CarSat1 | red    | na |
| chrUn | 81061021 | 81061729 | 709  | CarSat1 | red    | na |
| chrUn | 81061759 | 81062738 | 980  | CarSat1 | red    | na |
| chrUn | 81062765 | 81064673 | 1909 | CarSat1 | red    | na |
| chrUn | 81064695 | 81064821 | 127  | Carsat2 | orange | na |
| chrUn | 81064710 | 81065462 | 753  | CarSat1 | red    | na |
| chrUn | 81089355 | 81090805 | 1451 | CarSat1 | red    | na |
| chrUn | 81090830 | 81093026 | 2197 | CarSat1 | red    | na |

|       |          |          |      |         |     |    |
|-------|----------|----------|------|---------|-----|----|
| chrUn | 81093051 | 81093510 | 460  | CarSat1 | red | na |
| chrUn | 81093537 | 81095887 | 2351 | CarSat1 | red | na |
| chrUn | 81096912 | 81098296 | 1385 | CarSat1 | red | na |
| chrUn | 81098317 | 81100637 | 2321 | CarSat1 | red | na |
| chrUn | 81100658 | 81101866 | 1209 | CarSat1 | red | na |
| chrUn | 81101890 | 81103513 | 1624 | CarSat1 | red | na |
| chrUn | 81104526 | 81105259 | 734  | CarSat1 | red | na |
| chrUn | 81105446 | 81106507 | 1062 | CarSat1 | red | na |
| chrUn | 81106528 | 81107974 | 1447 | CarSat1 | red | na |
| chrUn | 81108001 | 81108711 | 711  | CarSat1 | red | na |
| chrUn | 81108738 | 81109205 | 468  | CarSat1 | red | na |
| chrUn | 81109221 | 81111128 | 1908 | CarSat1 | red | na |
| chrUn | 81112140 | 81112601 | 462  | CarSat1 | red | na |
| chrUn | 81112628 | 81113097 | 470  | CarSat1 | red | na |
| chrUn | 81113113 | 81114811 | 1699 | CarSat1 | red | na |
| chrUn | 81114838 | 81115548 | 711  | CarSat1 | red | na |
| chrUn | 81115575 | 81116285 | 711  | CarSat1 | red | na |
| chrUn | 81116316 | 81117021 | 706  | CarSat1 | red | na |
| chrUn | 81117048 | 81118730 | 1683 | CarSat1 | red | na |
| chrUn | 81119731 | 81120394 | 664  | CarSat1 | red | na |
| chrUn | 81120424 | 81121387 | 964  | CarSat1 | red | na |
| chrUn | 81121403 | 81121871 | 469  | CarSat1 | red | na |
| chrUn | 81121898 | 81122607 | 710  | CarSat1 | red | na |
| chrUn | 81122634 | 81123791 | 1158 | CarSat1 | red | na |
| chrUn | 81123831 | 81125062 | 1232 | CarSat1 | red | na |
| chrUn | 81125078 | 81125799 | 722  | CarSat1 | red | na |
| chrUn | 81125815 | 81126332 | 518  | CarSat1 | red | na |
| chrUn | 81127332 | 81128777 | 1446 | CarSat1 | red | na |
| chrUn | 81128793 | 81129513 | 721  | CarSat1 | red | na |
| chrUn | 81129529 | 81130249 | 721  | CarSat1 | red | na |
| chrUn | 81130265 | 81131469 | 1205 | CarSat1 | red | na |
| chrUn | 81131496 | 81132453 | 958  | CarSat1 | red | na |
| chrUn | 81132469 | 81133190 | 722  | CarSat1 | red | na |
| chrUn | 81133206 | 81133924 | 719  | CarSat1 | red | na |
| chrUn | 81134924 | 81136578 | 1655 | CarSat1 | red | na |
| chrUn | 81136605 | 81137073 | 469  | CarSat1 | red | na |
| chrUn | 81137089 | 81138050 | 962  | CarSat1 | red | na |
| chrUn | 81138077 | 81138784 | 708  | CarSat1 | red | na |
| chrUn | 81138811 | 81141514 | 2704 | CarSat1 | red | na |
| chrUn | 81142515 | 81149092 | 6578 | CarSat1 | red | na |
| chrUn | 81150111 | 81153867 | 3757 | CarSat1 | red | na |
| chrUn | 81153882 | 81156072 | 2191 | CarSat1 | red | na |

|       |          |          |      |         |        |    |
|-------|----------|----------|------|---------|--------|----|
| chrUn | 81156102 | 81156677 | 576  | CarSat1 | red    | na |
| chrUn | 81166061 | 81167245 | 1185 | CarSat1 | red    | na |
| chrUn | 81167272 | 81168970 | 1699 | CarSat1 | red    | na |
| chrUn | 81168995 | 81169707 | 713  | CarSat1 | red    | na |
| chrUn | 81169723 | 81170192 | 470  | CarSat1 | red    | na |
| chrUn | 81170219 | 81170930 | 712  | CarSat1 | red    | na |
| chrUn | 81170957 | 81171919 | 963  | CarSat1 | red    | na |
| chrUn | 81171935 | 81172517 | 583  | CarSat1 | red    | na |
| chrUn | 81181128 | 81182282 | 1155 | CarSat1 | red    | na |
| chrUn | 81182298 | 81183233 | 936  | CarSat1 | red    | na |
| chrUn | 81183263 | 81184242 | 980  | CarSat1 | red    | na |
| chrUn | 81184269 | 81184709 | 441  | CarSat1 | red    | na |
| chrUn | 81184739 | 81185715 | 977  | CarSat1 | red    | na |
| chrUn | 81185742 | 81186452 | 711  | CarSat1 | red    | na |
| chrUn | 81186473 | 81187553 | 1081 | CarSat1 | red    | na |
| chrUn | 81188723 | 81190773 | 2051 | CarSat1 | red    | na |
| chrUn | 81190788 | 81190915 | 128  | Carsat2 | orange | na |
| chrUn | 81190803 | 81192249 | 1447 | CarSat1 | red    | na |
| chrUn | 81192264 | 81192391 | 128  | Carsat2 | orange | na |
| chrUn | 81192279 | 81193727 | 1449 | CarSat1 | red    | na |
| chrUn | 81193757 | 81195284 | 1528 | CarSat1 | red    | na |
| chrUn | 81197205 | 81197936 | 732  | CarSat1 | red    | na |
| chrUn | 81197957 | 81198997 | 1041 | CarSat1 | red    | na |
| chrUn | 81199029 | 81200207 | 1179 | CarSat1 | red    | na |
| chrUn | 81200234 | 81201213 | 980  | CarSat1 | red    | na |
| chrUn | 81201243 | 81202178 | 936  | CarSat1 | red    | na |
| chrUn | 81202194 | 81202861 | 668  | CarSat1 | red    | na |
| chrUn | 81203870 | 81204669 | 800  | CarSat1 | red    | na |
| chrUn | 81204696 | 81205406 | 711  | CarSat1 | red    | na |
| chrUn | 81205433 | 81206143 | 711  | CarSat1 | red    | na |
| chrUn | 81206170 | 81207368 | 1199 | CarSat1 | red    | na |
| chrUn | 81207393 | 81208103 | 711  | CarSat1 | red    | na |
| chrUn | 81208129 | 81210438 | 2310 | CarSat1 | red    | na |
| chrUn | 81211443 | 81213162 | 1720 | CarSat1 | red    | na |
| chrUn | 81213177 | 81213304 | 128  | Carsat2 | orange | na |
| chrUn | 81213192 | 81213904 | 713  | CarSat1 | red    | na |
| chrUn | 81213934 | 81216114 | 2181 | CarSat1 | red    | na |
| chrUn | 81216129 | 81216255 | 127  | Carsat2 | orange | na |
| chrUn | 81216144 | 81216845 | 702  | CarSat1 | red    | na |
| chrUn | 81216882 | 81218012 | 1131 | CarSat1 | red    | na |
| chrUn | 81219013 | 81219680 | 668  | CarSat1 | red    | na |
| chrUn | 81219707 | 81220669 | 963  | CarSat1 | red    | na |

|       |          |          |      |         |      |    |
|-------|----------|----------|------|---------|------|----|
| chrUn | 81220685 | 81223045 | 2361 | CarSat1 | red  | na |
| chrUn | 81223070 | 81224518 | 1449 | CarSat1 | red  | na |
| chrUn | 81224543 | 81225581 | 1039 | CarSat1 | red  | na |
| chrUn | 81226647 | 81227314 | 668  | CarSat1 | red  | na |
| chrUn | 81227341 | 81228785 | 1445 | CarSat1 | red  | na |
| chrUn | 81228812 | 81229271 | 460  | CarSat1 | red  | na |
| chrUn | 81229296 | 81230017 | 722  | CarSat1 | red  | na |
| chrUn | 81230033 | 81232228 | 2196 | CarSat1 | red  | na |
| chrUn | 81232244 | 81233138 | 895  | CarSat1 | red  | na |
| chrUn | 81234174 | 81236265 | 2092 | SAT1_CF | blue | na |
| chrUn | 81236283 | 81236804 | 522  | SAT1_CF | blue | na |
| chrUn | 81236820 | 81238346 | 1527 | SAT1_CF | blue | na |
| chrUn | 81238390 | 81239079 | 690  | SAT1_CF | blue | na |
| chrUn | 81239090 | 81240712 | 1623 | SAT1_CF | blue | na |
| chrUn | 81249410 | 81250298 | 889  | CarSat1 | red  | na |
| chrUn | 81250323 | 81251035 | 713  | CarSat1 | red  | na |
| chrUn | 81251060 | 81252024 | 965  | CarSat1 | red  | na |
| chrUn | 81252051 | 81252760 | 710  | CarSat1 | red  | na |
| chrUn | 81252787 | 81253498 | 712  | CarSat1 | red  | na |
| chrUn | 81253525 | 81254234 | 710  | CarSat1 | red  | na |
| chrUn | 81254261 | 81254721 | 461  | CarSat1 | red  | na |
| chrUn | 81254746 | 81255809 | 1064 | CarSat1 | red  | na |
| chrUn | 81256947 | 81257879 | 933  | CarSat1 | red  | na |
| chrUn | 81257909 | 81258348 | 440  | CarSat1 | red  | na |
| chrUn | 81258375 | 81259084 | 710  | CarSat1 | red  | na |
| chrUn | 81259111 | 81259579 | 469  | CarSat1 | red  | na |
| chrUn | 81259595 | 81260165 | 571  | CarSat1 | red  | na |
| chrUn | 81260365 | 81261264 | 900  | CarSat1 | red  | na |
| chrUn | 81261289 | 81263449 | 2161 | CarSat1 | red  | na |
| chrUn | 81264509 | 81265066 | 558  | CarSat1 | red  | na |
| chrUn | 81265091 | 81265801 | 711  | CarSat1 | red  | na |
| chrUn | 81265827 | 81267025 | 1199 | CarSat1 | red  | na |
| chrUn | 81267052 | 81267762 | 711  | CarSat1 | red  | na |
| chrUn | 81267789 | 81268497 | 709  | CarSat1 | red  | na |
| chrUn | 81268524 | 81268964 | 441  | CarSat1 | red  | na |
| chrUn | 81268994 | 81271030 | 2037 | CarSat1 | red  | na |
| chrUn | 81272037 | 81272726 | 690  | SAT1_CF | blue | na |
| chrUn | 81272769 | 81273279 | 511  | SAT1_CF | blue | na |
| chrUn | 81273307 | 81273464 | 158  | SAT1_CF | blue | na |
| chrUn | 81273509 | 81274010 | 502  | SAT1_CF | blue | na |
| chrUn | 81274032 | 81276868 | 2837 | SAT1_CF | blue | na |
| chrUn | 81276879 | 81276987 | 109  | SAT1_CF | blue | na |

|       |          |          |              |      |    |
|-------|----------|----------|--------------|------|----|
| chrUn | 81277013 | 81277534 | 522 SAT1_CF  | blue | na |
| chrUn | 81277547 | 81278153 | 607 SAT1_CF  | blue | na |
| chrUn | 81278165 | 81278561 | 397 SAT1_CF  | blue | na |
| chrUn | 81279825 | 81279976 | 152 SAT1_CF  | blue | na |
| chrUn | 81280021 | 81281218 | 1198 SAT1_CF | blue | na |
| chrUn | 81281230 | 81282092 | 863 SAT1_CF  | blue | na |
| chrUn | 81282134 | 81283822 | 1689 SAT1_CF | blue | na |
| chrUn | 81284193 | 81284376 | 184 SAT1_CF  | blue | na |
| chrUn | 81287501 | 81287596 | 96 SAT1_CF   | blue | na |
| chrUn | 81287622 | 81289161 | 1540 SAT1_CF | blue | na |
| chrUn | 81305240 | 81309038 | 3799 CarSat1 | red  | na |
| chrUn | 81309068 | 81310045 | 978 CarSat1  | red  | na |
| chrUn | 81310072 | 81311365 | 1294 CarSat1 | red  | na |
| chrUn | 81311379 | 81311766 | 388 CarSat1  | red  | na |
| chrUn | 81312771 | 81313970 | 1200 CarSat1 | red  | na |
| chrUn | 81314146 | 81318230 | 4085 CarSat1 | red  | na |
| chrUn | 81318262 | 81319292 | 1031 CarSat1 | red  | na |
| chrUn | 81320359 | 81322049 | 1691 CarSat1 | red  | na |
| chrUn | 81322074 | 81323010 | 937 CarSat1  | red  | na |
| chrUn | 81323040 | 81324018 | 979 CarSat1  | red  | na |
| chrUn | 81324045 | 81325006 | 962 CarSat1  | red  | na |
| chrUn | 81325022 | 81326822 | 1801 CarSat1 | red  | na |
| chrUn | 81327824 | 81328425 | 602 CarSat1  | red  | na |
| chrUn | 81328452 | 81329412 | 961 CarSat1  | red  | na |
| chrUn | 81329437 | 81330140 | 704 CarSat1  | red  | na |
| chrUn | 81330174 | 81330886 | 713 CarSat1  | red  | na |
| chrUn | 81330911 | 81332109 | 1199 CarSat1 | red  | na |
| chrUn | 81332136 | 81333826 | 1691 CarSat1 | red  | na |
| chrUn | 81333851 | 81334315 | 465 CarSat1  | red  | na |
| chrUn | 81342881 | 81343764 | 884 CarSat1  | red  | na |
| chrUn | 81343807 | 81344786 | 980 CarSat1  | red  | na |
| chrUn | 81344813 | 81345523 | 711 CarSat1  | red  | na |
| chrUn | 81345550 | 81346260 | 711 CarSat1  | red  | na |
| chrUn | 81346287 | 81346707 | 421 CarSat1  | red  | na |
| chrUn | 81346750 | 81347729 | 980 CarSat1  | red  | na |
| chrUn | 81347756 | 81348717 | 962 CarSat1  | red  | na |
| chrUn | 81348743 | 81349370 | 628 CarSat1  | red  | na |
| chrUn | 81357915 | 81358268 | 354 CarSat1  | red  | na |
| chrUn | 81358299 | 81359147 | 849 CarSat1  | red  | na |
| chrUn | 81359168 | 81359604 | 437 CarSat1  | red  | na |
| chrUn | 81363907 | 81365035 | 1129 CarSat1 | red  | na |
| chrUn | 81365066 | 81366654 | 1589 CarSat1 | red  | na |

|       |          |          |      |         |      |    |
|-------|----------|----------|------|---------|------|----|
| chrUn | 81366685 | 81368273 | 1589 | CarSat1 | red  | na |
| chrUn | 81368304 | 81368643 | 340  | CarSat1 | red  | na |
| chrUn | 81369646 | 81369981 | 336  | SAT1_CF | blue | na |
| chrUn | 81369983 | 81372885 | 2903 | CarSat1 | red  | na |
| chrUn | 81372901 | 81374844 | 1944 | CarSat1 | red  | na |
| chrUn | 81374871 | 81376128 | 1258 | CarSat1 | red  | na |
| chrUn | 81377149 | 81377819 | 671  | CarSat1 | red  | na |
| chrUn | 81377835 | 81379780 | 1946 | CarSat1 | red  | na |
| chrUn | 81379807 | 81383651 | 3845 | CarSat1 | red  | na |
| chrUn | 81384669 | 81385324 | 656  | CarSat1 | red  | na |
| chrUn | 81385348 | 81386585 | 1238 | CarSat1 | red  | na |
| chrUn | 81386600 | 81389753 | 3154 | CarSat1 | red  | na |
| chrUn | 81389777 | 81390430 | 654  | CarSat1 | red  | na |
| chrUn | 81390613 | 81391157 | 545  | CarSat1 | red  | na |
| chrUn | 81392160 | 81393772 | 1613 | CarSat1 | red  | na |
| chrUn | 81393799 | 81395246 | 1448 | CarSat1 | red  | na |
| chrUn | 81395273 | 81396267 | 995  | CarSat1 | red  | na |
| chrUn | 81396282 | 81397954 | 1673 | CarSat1 | red  | na |
| chrUn | 81397970 | 81398658 | 689  | CarSat1 | red  | na |
| chrUn | 81399675 | 81400755 | 1081 | CarSat1 | red  | na |
| chrUn | 81400771 | 81402221 | 1451 | CarSat1 | red  | na |
| chrUn | 81402246 | 81403695 | 1450 | CarSat1 | red  | na |
| chrUn | 81403720 | 81404440 | 721  | CarSat1 | red  | na |
| chrUn | 81404456 | 81406157 | 1702 | CarSat1 | red  | na |
| chrUn | 81407158 | 81408833 | 1676 | CarSat1 | red  | na |
| chrUn | 81408860 | 81409328 | 469  | CarSat1 | red  | na |
| chrUn | 81409344 | 81410065 | 722  | CarSat1 | red  | na |
| chrUn | 81410081 | 81411540 | 1460 | CarSat1 | red  | na |
| chrUn | 81411556 | 81413015 | 1460 | CarSat1 | red  | na |
| chrUn | 81413031 | 81413646 | 616  | CarSat1 | red  | na |
| chrUn | 81414672 | 81415665 | 994  | CarSat1 | red  | na |
| chrUn | 81415680 | 81417592 | 1913 | CarSat1 | red  | na |
| chrUn | 81417619 | 81418826 | 1208 | CarSat1 | red  | na |
| chrUn | 81418842 | 81421118 | 2277 | CarSat1 | red  | na |
| chrUn | 81422147 | 81422706 | 560  | CarSat1 | red  | na |
| chrUn | 81422730 | 81424957 | 2228 | CarSat1 | red  | na |
| chrUn | 81424973 | 81425466 | 494  | CarSat1 | red  | na |
| chrUn | 81425496 | 81427901 | 2406 | CarSat1 | red  | na |
| chrUn | 81427934 | 81428632 | 699  | CarSat1 | red  | na |
| chrUn | 81429654 | 81430522 | 869  | CarSat1 | red  | na |
| chrUn | 81430537 | 81432196 | 1660 | CarSat1 | red  | na |
| chrUn | 81432230 | 81432948 | 719  | CarSat1 | red  | na |



|       |          |          |      |         |        |    |
|-------|----------|----------|------|---------|--------|----|
| chrUn | 81432972 | 81433930 | 959  | CarSat1 | red    | na |
| chrUn | 81433951 | 81434421 | 471  | CarSat1 | red    | na |
| chrUn | 81434445 | 81435159 | 715  | CarSat1 | red    | na |
| chrUn | 81435183 | 81436120 | 938  | CarSat1 | red    | na |
| chrUn | 81444607 | 81446417 | 1811 | CarSat1 | red    | na |
| chrUn | 81446447 | 81447426 | 980  | CarSat1 | red    | na |
| chrUn | 81447453 | 81448164 | 712  | CarSat1 | red    | na |
| chrUn | 81448191 | 81448630 | 440  | CarSat1 | red    | na |
| chrUn | 81448660 | 81450376 | 1717 | CarSat1 | red    | na |
| chrUn | 81450403 | 81451071 | 669  | CarSat1 | red    | na |
| chrUn | 81459581 | 81462502 | 2922 | CarSat1 | red    | na |
| chrUn | 81462518 | 81463227 | 710  | CarSat1 | red    | na |
| chrUn | 81463243 | 81464207 | 965  | CarSat1 | red    | na |
| chrUn | 81464234 | 81464943 | 710  | CarSat1 | red    | na |
| chrUn | 81464970 | 81466011 | 1042 | CarSat1 | red    | na |
| chrUn | 81475704 | 81476680 | 977  | CarSat1 | red    | na |
| chrUn | 81476710 | 81477673 | 964  | CarSat1 | red    | na |
| chrUn | 81477689 | 81478618 | 930  | CarSat1 | red    | na |
| chrUn | 81478655 | 81479633 | 979  | CarSat1 | red    | na |
| chrUn | 81479660 | 81480618 | 959  | CarSat1 | red    | na |
| chrUn | 81480634 | 81481103 | 470  | CarSat1 | red    | na |
| chrUn | 81481130 | 81482115 | 986  | CarSat1 | red    | na |
| chrUn | 81483143 | 81486943 | 3801 | CarSat1 | red    | na |
| chrUn | 81486959 | 81487920 | 962  | CarSat1 | red    | na |
| chrUn | 81487947 | 81488925 | 979  | CarSat1 | red    | na |
| chrUn | 81488955 | 81489575 | 621  | CarSat1 | red    | na |
| chrUn | 81498033 | 81504404 | 6372 | Carsat2 | orange | na |
| chrUn | 81505484 | 81507050 | 1567 | CarSat1 | red    | na |
| chrUn | 81507083 | 81508532 | 1450 | CarSat1 | red    | na |
| chrUn | 81508556 | 81510529 | 1974 | CarSat1 | red    | na |
| chrUn | 81510544 | 81511250 | 707  | CarSat1 | red    | na |
| chrUn | 81511280 | 81511921 | 642  | CarSat1 | red    | na |
| chrUn | 81514227 | 81515478 | 1252 | Sat2CF  | purple | na |
| chrUn | 81514357 | 81515442 | 1086 | Sat2CF  | purple | na |
| chrUn | 81515318 | 81515519 | 202  | Sat2CF  | purple | na |
| chrUn | 81518308 | 81519344 | 1037 | CarSat1 | red    | na |
| chrUn | 81520391 | 81521316 | 926  | CarSat1 | red    | na |
| chrUn | 81521341 | 81523525 | 2185 | CarSat1 | red    | na |
| chrUn | 81523550 | 81525516 | 1967 | CarSat1 | red    | na |
| chrUn | 81525546 | 81526721 | 1176 | CarSat1 | red    | na |
| chrUn | 81527814 | 81530564 | 2751 | CarSat1 | red    | na |
| chrUn | 81530591 | 81531304 | 714  | CarSat1 | red    | na |

|       |          |          |      |         |      |    |
|-------|----------|----------|------|---------|------|----|
| chrUn | 81531325 | 81532279 | 955  | CarSat1 | red  | na |
| chrUn | 81532305 | 81534235 | 1931 | CarSat1 | red  | na |
| chrUn | 81542675 | 81543286 | 612  | CarSat1 | red  | na |
| chrUn | 81543302 | 81544238 | 937  | CarSat1 | red  | na |
| chrUn | 81544268 | 81545247 | 980  | CarSat1 | red  | na |
| chrUn | 81545274 | 81546235 | 962  | CarSat1 | red  | na |
| chrUn | 81546251 | 81547187 | 937  | CarSat1 | red  | na |
| chrUn | 81547217 | 81548449 | 1233 | CarSat1 | red  | na |
| chrUn | 81548474 | 81549097 | 624  | CarSat1 | red  | na |
| chrUn | 81557569 | 81558523 | 955  | SAT1_CF | blue | na |
| chrUn | 81558545 | 81559304 | 760  | SAT1_CF | blue | na |
| chrUn | 81559317 | 81560784 | 1468 | SAT1_CF | blue | na |
| chrUn | 81560805 | 81561093 | 289  | SAT1_CF | blue | na |
| chrUn | 81561272 | 81562103 | 832  | SAT1_CF | blue | na |
| chrUn | 81562146 | 81562794 | 649  | SAT1_CF | blue | na |
| chrUn | 81562808 | 81563308 | 501  | SAT1_CF | blue | na |
| chrUn | 81563394 | 81563748 | 355  | SAT1_CF | blue | na |
| chrUn | 81563761 | 81563950 | 190  | SAT1_CF | blue | na |
| chrUn | 81564967 | 81566794 | 1828 | CarSat1 | red  | na |
| chrUn | 81566819 | 81568031 | 1213 | CarSat1 | red  | na |
| chrUn | 81568056 | 81571388 | 3333 | CarSat1 | red  | na |
| chrUn | 81572391 | 81573004 | 614  | CarSat1 | red  | na |
| chrUn | 81573029 | 81575213 | 2185 | CarSat1 | red  | na |
| chrUn | 81575238 | 81575949 | 712  | CarSat1 | red  | na |
| chrUn | 81575974 | 81576695 | 722  | CarSat1 | red  | na |
| chrUn | 81576709 | 81577422 | 714  | CarSat1 | red  | na |
| chrUn | 81577447 | 81578160 | 714  | CarSat1 | red  | na |
| chrUn | 81578194 | 81578812 | 619  | CarSat1 | red  | na |
| chrUn | 81587239 | 81588393 | 1155 | CarSat1 | red  | na |
| chrUn | 81588430 | 81589409 | 980  | CarSat1 | red  | na |
| chrUn | 81589436 | 81590146 | 711  | CarSat1 | red  | na |
| chrUn | 81590173 | 81592348 | 2176 | CarSat1 | red  | na |
| chrUn | 81592375 | 81593085 | 711  | CarSat1 | red  | na |
| chrUn | 81593112 | 81593642 | 531  | CarSat1 | red  | na |
| chrUn | 81594654 | 81597012 | 2359 | CarSat1 | red  | na |
| chrUn | 81597038 | 81599224 | 2187 | CarSat1 | red  | na |
| chrUn | 81599249 | 81601061 | 1813 | CarSat1 | red  | na |
| chrUn | 81602083 | 81604901 | 2819 | CarSat1 | red  | na |
| chrUn | 81604928 | 81607112 | 2185 | CarSat1 | red  | na |
| chrUn | 81607143 | 81608485 | 1343 | CarSat1 | red  | na |
| chrUn | 81609491 | 81610195 | 705  | CarSat1 | red  | na |
| chrUn | 81610222 | 81612914 | 2693 | CarSat1 | red  | na |

|       |          |          |      |         |        |    |
|-------|----------|----------|------|---------|--------|----|
| chrUn | 81612939 | 81613643 | 705  | CarSat1 | red    | na |
| chrUn | 81613668 | 81614631 | 964  | CarSat1 | red    | na |
| chrUn | 81614658 | 81615906 | 1249 | CarSat1 | red    | na |
| chrUn | 81624323 | 81625628 | 1306 | CarSat1 | red    | na |
| chrUn | 81625643 | 81627102 | 1460 | CarSat1 | red    | na |
| chrUn | 81627117 | 81627825 | 709  | CarSat1 | red    | na |
| chrUn | 81627856 | 81629317 | 1462 | CarSat1 | red    | na |
| chrUn | 81629332 | 81630058 | 727  | CarSat1 | red    | na |
| chrUn | 81630073 | 81630731 | 659  | CarSat1 | red    | na |
| chrUn | 81631764 | 81633779 | 2016 | CarSat1 | red    | na |
| chrUn | 81633810 | 81635259 | 1450 | CarSat1 | red    | na |
| chrUn | 81635286 | 81635996 | 711  | CarSat1 | red    | na |
| chrUn | 81636023 | 81636732 | 710  | CarSat1 | red    | na |
| chrUn | 81636759 | 81638139 | 1381 | CarSat1 | red    | na |
| chrUn | 81639140 | 81640444 | 1305 | CarSat1 | red    | na |
| chrUn | 81640474 | 81641922 | 1449 | CarSat1 | red    | na |
| chrUn | 81641937 | 81642052 | 116  | Carsat2 | orange | na |
| chrUn | 81641952 | 81644133 | 2182 | CarSat1 | red    | na |
| chrUn | 81644163 | 81644650 | 488  | CarSat1 | red    | na |
| chrUn | 81644674 | 81645528 | 855  | CarSat1 | red    | na |
| chrUn | 81646544 | 81647882 | 1339 | CarSat1 | red    | na |
| chrUn | 81647909 | 81648618 | 710  | CarSat1 | red    | na |
| chrUn | 81648645 | 81651081 | 2437 | CarSat1 | red    | na |
| chrUn | 81651097 | 81652306 | 1210 | CarSat1 | red    | na |
| chrUn | 81652333 | 81652918 | 586  | CarSat1 | red    | na |
| chrUn | 81653959 | 81654759 | 801  | CarSat1 | red    | na |
| chrUn | 81654775 | 81655982 | 1208 | CarSat1 | red    | na |
| chrUn | 81656009 | 81658441 | 2433 | CarSat1 | red    | na |
| chrUn | 81658457 | 81659662 | 1206 | CarSat1 | red    | na |
| chrUn | 81659689 | 81660331 | 643  | CarSat1 | red    | na |
| chrUn | 81661338 | 81663881 | 2544 | CarSat1 | red    | na |
| chrUn | 81663896 | 81664023 | 128  | Carsat2 | orange | na |
| chrUn | 81663911 | 81664618 | 708  | CarSat1 | red    | na |
| chrUn | 81664633 | 81664760 | 128  | Carsat2 | orange | na |
| chrUn | 81664648 | 81665359 | 712  | CarSat1 | red    | na |
| chrUn | 81665389 | 81667101 | 1713 | CarSat1 | red    | na |
| chrUn | 81667128 | 81667714 | 587  | CarSat1 | red    | na |
| chrUn | 81668729 | 81670544 | 1816 | CarSat1 | red    | na |
| chrUn | 81670571 | 81671279 | 709  | CarSat1 | red    | na |
| chrUn | 81671306 | 81675102 | 3797 | CarSat1 | red    | na |
| chrUn | 81676124 | 81677493 | 1370 | CarSat1 | red    | na |
| chrUn | 81677523 | 81679921 | 2399 | CarSat1 | red    | na |

|       |          |          |      |         |        |    |
|-------|----------|----------|------|---------|--------|----|
| chrUn | 81679954 | 81680440 | 487  | CarSat1 | red    | na |
| chrUn | 81680470 | 81681191 | 722  | CarSat1 | red    | na |
| chrUn | 81681206 | 81681913 | 708  | CarSat1 | red    | na |
| chrUn | 81681943 | 81682507 | 565  | CarSat1 | red    | na |
| chrUn | 81705672 | 81706752 | 1081 | CarSat1 | red    | na |
| chrUn | 81706782 | 81708961 | 2180 | CarSat1 | red    | na |
| chrUn | 81708991 | 81709049 | 59   | CarSat1 | red    | na |
| chrUn | 81709240 | 81709908 | 669  | CarSat1 | red    | na |
| chrUn | 81709938 | 81712035 | 2098 | CarSat1 | red    | na |
| chrUn | 81713043 | 81714233 | 1191 | CarSat1 | red    | na |
| chrUn | 81714260 | 81716445 | 2186 | CarSat1 | red    | na |
| chrUn | 81716472 | 81718896 | 2425 | CarSat1 | red    | na |
| chrUn | 81718921 | 81719390 | 470  | CarSat1 | red    | na |
| chrUn | 81720416 | 81724210 | 3795 | CarSat1 | red    | na |
| chrUn | 81724237 | 81724953 | 717  | CarSat1 | red    | na |
| chrUn | 81724974 | 81725443 | 470  | CarSat1 | red    | na |
| chrUn | 81725468 | 81725949 | 482  | CarSat1 | red    | na |
| chrUn | 81725986 | 81726783 | 798  | CarSat1 | red    | na |
| chrUn | 81735137 | 81735709 | 573  | CarSat1 | red    | na |
| chrUn | 81735734 | 81737184 | 1451 | CarSat1 | red    | na |
| chrUn | 81737217 | 81738882 | 1666 | CarSat1 | red    | na |
| chrUn | 81738912 | 81740132 | 1221 | CarSat1 | red    | na |
| chrUn | 81740157 | 81740878 | 722  | CarSat1 | red    | na |
| chrUn | 81740903 | 81741486 | 584  | CarSat1 | red    | na |
| chrUn | 81757210 | 81757761 | 552  | CarSat1 | red    | na |
| chrUn | 81757786 | 81759236 | 1451 | CarSat1 | red    | na |
| chrUn | 81759261 | 81760491 | 1231 | CarSat1 | red    | na |
| chrUn | 81760521 | 81761965 | 1445 | CarSat1 | red    | na |
| chrUn | 81762002 | 81762703 | 702  | CarSat1 | red    | na |
| chrUn | 81762733 | 81763533 | 801  | CarSat1 | red    | na |
| chrUn | 81771897 | 81772978 | 1082 | CarSat1 | red    | na |
| chrUn | 81773003 | 81775436 | 2434 | CarSat1 | red    | na |
| chrUn | 81775457 | 81776662 | 1206 | CarSat1 | red    | na |
| chrUn | 81776687 | 81777646 | 960  | CarSat1 | red    | na |
| chrUn | 81777667 | 81778220 | 554  | CarSat1 | red    | na |
| chrUn | 81786567 | 81788915 | 2349 | CarSat1 | red    | na |
| chrUn | 81788930 | 81789056 | 127  | Carsat2 | orange | na |
| chrUn | 81788945 | 81790388 | 1444 | CarSat1 | red    | na |
| chrUn | 81790403 | 81790529 | 127  | Carsat2 | orange | na |
| chrUn | 81790418 | 81791124 | 707  | CarSat1 | red    | na |
| chrUn | 81791139 | 81791265 | 127  | Carsat2 | orange | na |
| chrUn | 81791156 | 81791860 | 705  | CarSat1 | red    | na |

|       |          |          |      |         |        |    |
|-------|----------|----------|------|---------|--------|----|
| chrUn | 81791890 | 81792902 | 1013 | CarSat1 | red    | na |
| chrUn | 81801245 | 81801694 | 450  | CarSat1 | red    | na |
| chrUn | 81801708 | 81801836 | 129  | Carsat2 | orange | na |
| chrUn | 81801724 | 81802432 | 709  | CarSat1 | red    | na |
| chrUn | 81802462 | 81803170 | 709  | CarSat1 | red    | na |
| chrUn | 81803185 | 81803312 | 128  | Carsat2 | orange | na |
| chrUn | 81803201 | 81804645 | 1445 | CarSat1 | red    | na |
| chrUn | 81804675 | 81807572 | 2898 | CarSat1 | red    | na |
| chrUn | 81808587 | 81809709 | 1123 | CarSat1 | red    | na |
| chrUn | 81809734 | 81812659 | 2926 | CarSat1 | red    | na |
| chrUn | 81812684 | 81813387 | 704  | CarSat1 | red    | na |
| chrUn | 81813412 | 81814911 | 1500 | CarSat1 | red    | na |
| chrUn | 81815917 | 81817801 | 1885 | CarSat1 | red    | na |
| chrUn | 81817822 | 81818788 | 967  | CarSat1 | red    | na |
| chrUn | 81818817 | 81819530 | 714  | CarSat1 | red    | na |
| chrUn | 81819555 | 81820258 | 704  | CarSat1 | red    | na |
| chrUn | 81820283 | 81821211 | 929  | CarSat1 | red    | na |
| chrUn | 81821248 | 81822225 | 978  | CarSat1 | red    | na |
| chrUn | 81830587 | 81831170 | 584  | CarSat1 | red    | na |
| chrUn | 81831196 | 81833137 | 1942 | CarSat1 | red    | na |
| chrUn | 81833162 | 81834114 | 953  | CarSat1 | red    | na |
| chrUn | 81834141 | 81834852 | 712  | CarSat1 | red    | na |
| chrUn | 81834879 | 81835589 | 711  | CarSat1 | red    | na |
| chrUn | 81835616 | 81836903 | 1288 | CarSat1 | red    | na |
| chrUn | 81837907 | 81839272 | 1366 | CarSat1 | red    | na |
| chrUn | 81839297 | 81844186 | 4890 | CarSat1 | red    | na |
| chrUn | 81847138 | 81848086 | 949  | CarSat1 | red    | na |
| chrUn | 81848237 | 81849867 | 1631 | CarSat1 | red    | na |
| chrUn | 81849897 | 81851067 | 1171 | CarSat1 | red    | na |
| chrUn | 81851094 | 81851544 | 451  | CarSat1 | red    | na |
| chrUn | 81860793 | 81861275 | 483  | CarSat1 | red    | na |
| chrUn | 81861300 | 81863978 | 2679 | CarSat1 | red    | na |
| chrUn | 81864005 | 81864473 | 469  | CarSat1 | red    | na |
| chrUn | 81864016 | 81865695 | 1680 | CarSat1 | red    | na |
| chrUn | 81865720 | 81867084 | 1365 | CarSat1 | red    | na |
| chrUn | 81868098 | 81869284 | 1187 | CarSat1 | red    | na |
| chrUn | 81869299 | 81869425 | 127  | Carsat2 | orange | na |
| chrUn | 81869315 | 81870020 | 706  | CarSat1 | red    | na |
| chrUn | 81870035 | 81870161 | 127  | Carsat2 | orange | na |
| chrUn | 81870050 | 81870756 | 707  | CarSat1 | red    | na |
| chrUn | 81870771 | 81870896 | 126  | Carsat2 | orange | na |
| chrUn | 81870786 | 81871493 | 708  | CarSat1 | red    | na |

|       |          |          |      |         |        |    |
|-------|----------|----------|------|---------|--------|----|
| chrUn | 81871508 | 81871633 | 126  | Carsat2 | orange | na |
| chrUn | 81871523 | 81872970 | 1448 | CarSat1 | red    | na |
| chrUn | 81872985 | 81873111 | 127  | Carsat2 | orange | na |
| chrUn | 81873000 | 81874399 | 1400 | CarSat1 | red    | na |
| chrUn | 81882795 | 81883504 | 710  | CarSat1 | red    | na |
| chrUn | 81883525 | 81884477 | 953  | CarSat1 | red    | na |
| chrUn | 81884502 | 81884970 | 469  | CarSat1 | red    | na |
| chrUn | 81884991 | 81885949 | 959  | CarSat1 | red    | na |
| chrUn | 81885974 | 81888158 | 2185 | CarSat1 | red    | na |
| chrUn | 81888180 | 81889018 | 839  | CarSat1 | red    | na |
| chrUn | 81904642 | 81908677 | 4036 | CarSat1 | red    | na |
| chrUn | 81908693 | 81909162 | 470  | CarSat1 | red    | na |
| chrUn | 81909189 | 81910943 | 1755 | CarSat1 | red    | na |
| chrUn | 81912598 | 81916414 | 3817 | CarSat1 | red    | na |
| chrUn | 81916439 | 81917161 | 723  | CarSat1 | red    | na |
| chrUn | 81917177 | 81918223 | 1047 | CarSat1 | red    | na |
| chrUn | 81926577 | 81927045 | 469  | CarSat1 | red    | na |
| chrUn | 81927072 | 81927782 | 711  | CarSat1 | red    | na |
| chrUn | 81927809 | 81928519 | 711  | CarSat1 | red    | na |
| chrUn | 81928546 | 81929994 | 1449 | CarSat1 | red    | na |
| chrUn | 81930021 | 81930461 | 441  | CarSat1 | red    | na |
| chrUn | 81930491 | 81932843 | 2353 | CarSat1 | red    | na |
| chrUn | 81933849 | 81935117 | 1269 | CarSat1 | red    | na |
| chrUn | 81935144 | 81935853 | 710  | CarSat1 | red    | na |
| chrUn | 81935880 | 81936587 | 708  | CarSat1 | red    | na |
| chrUn | 81936614 | 81937817 | 1204 | CarSat1 | red    | na |
| chrUn | 81937842 | 81938795 | 954  | CarSat1 | red    | na |
| chrUn | 81939139 | 81940138 | 1000 | CarSat1 | red    | na |
| chrUn | 81941138 | 81941688 | 551  | SAT1_CF | blue   | na |
| chrUn | 81941723 | 81943568 | 1846 | SAT1_CF | blue   | na |
| chrUn | 81943621 | 81944302 | 682  | SAT1_CF | blue   | na |
| chrUn | 81944320 | 81944840 | 521  | SAT1_CF | blue   | na |
| chrUn | 81944857 | 81945230 | 374  | SAT1_CF | blue   | na |
| chrUn | 81945273 | 81945816 | 544  | SAT1_CF | blue   | na |
| chrUn | 81945895 | 81946663 | 769  | SAT1_CF | blue   | na |
| chrUn | 81946716 | 81947423 | 708  | SAT1_CF | blue   | na |
| chrUn | 81948433 | 81949476 | 1044 | CarSat1 | red    | na |
| chrUn | 81949503 | 81950558 | 1056 | CarSat1 | red    | na |
| chrUn | 81950775 | 81954706 | 3932 | CarSat1 | red    | na |
| chrUn | 81955717 | 81957666 | 1950 | CarSat1 | red    | na |
| chrUn | 81957696 | 81959368 | 1673 | CarSat1 | red    | na |
| chrUn | 81959384 | 81960347 | 964  | CarSat1 | red    | na |

|       |          |          |      |         |     |    |
|-------|----------|----------|------|---------|-----|----|
| chrUn | 81960374 | 81960843 | 470  | CarSat1 | red | na |
| chrUn | 81960869 | 81961998 | 1130 | CarSat1 | red | na |
| chrUn | 81963002 | 81963354 | 353  | CarSat1 | red | na |
| chrUn | 81963547 | 81966644 | 3098 | CarSat1 | red | na |
| chrUn | 81966660 | 81967129 | 470  | CarSat1 | red | na |
| chrUn | 81967156 | 81967868 | 713  | CarSat1 | red | na |
| chrUn | 81967893 | 81968603 | 711  | CarSat1 | red | na |
| chrUn | 81968630 | 81969281 | 652  | CarSat1 | red | na |
| chrUn | 81970288 | 81971461 | 1174 | CarSat1 | red | na |
| chrUn | 81971488 | 81972451 | 964  | CarSat1 | red | na |
| chrUn | 81972467 | 81972935 | 469  | CarSat1 | red | na |
| chrUn | 81972962 | 81974140 | 1179 | CarSat1 | red | na |
| chrUn | 81974170 | 81975400 | 1231 | CarSat1 | red | na |
| chrUn | 81975416 | 81975885 | 470  | CarSat1 | red | na |
| chrUn | 81975912 | 81976562 | 651  | CarSat1 | red | na |
| chrUn | 81977570 | 81980623 | 3054 | CarSat1 | red | na |
| chrUn | 81980639 | 81981566 | 928  | CarSat1 | red | na |
| chrUn | 81981607 | 81983323 | 1717 | CarSat1 | red | na |
| chrUn | 81983361 | 81983854 | 494  | CarSat1 | red | na |
| chrUn | 81984854 | 81987317 | 2464 | CarSat1 | red | na |
| chrUn | 81987332 | 81988038 | 707  | CarSat1 | red | na |
| chrUn | 81988068 | 81991129 | 3062 | CarSat1 | red | na |
| chrUn | 81992188 | 81994101 | 1914 | CarSat1 | red | na |
| chrUn | 81994131 | 81994624 | 494  | CarSat1 | red | na |
| chrUn | 81994640 | 81996834 | 2195 | CarSat1 | red | na |
| chrUn | 81996850 | 81998386 | 1537 | CarSat1 | red | na |
| chrUn | 81999413 | 82000643 | 1231 | CarSat1 | red | na |
| chrUn | 82000659 | 82002844 | 2186 | CarSat1 | red | na |
| chrUn | 82002872 | 82004332 | 1461 | CarSat1 | red | na |
| chrUn | 82004348 | 82005685 | 1338 | CarSat1 | red | na |
| chrUn | 82006707 | 82007562 | 856  | CarSat1 | red | na |
| chrUn | 82007591 | 82008515 | 925  | CarSat1 | red | na |
| chrUn | 82008540 | 82011603 | 3064 | CarSat1 | red | na |
| chrUn | 82011630 | 82012964 | 1335 | CarSat1 | red | na |
| chrUn | 82013968 | 82015853 | 1886 | CarSat1 | red | na |
| chrUn | 82015869 | 82016832 | 964  | CarSat1 | red | na |
| chrUn | 82016859 | 82018306 | 1448 | CarSat1 | red | na |
| chrUn | 82018337 | 82018798 | 462  | CarSat1 | red | na |
| chrUn | 82018823 | 82020234 | 1412 | CarSat1 | red | na |
| chrUn | 82021235 | 82022672 | 1438 | CarSat1 | red | na |
| chrUn | 82022697 | 82023659 | 963  | CarSat1 | red | na |
| chrUn | 82023684 | 82024881 | 1198 | CarSat1 | red | na |

|       |          |          |      |         |        |    |
|-------|----------|----------|------|---------|--------|----|
| chrUn | 82024908 | 82025618 | 711  | CarSat1 | red    | na |
| chrUn | 82025645 | 82026596 | 952  | CarSat1 | red    | na |
| chrUn | 82026621 | 82027501 | 881  | CarSat1 | red    | na |
| chrUn | 82028509 | 82029585 | 1077 | CarSat1 | red    | na |
| chrUn | 82029610 | 82030313 | 704  | CarSat1 | red    | na |
| chrUn | 82030338 | 82031585 | 1248 | CarSat1 | red    | na |
| chrUn | 82031600 | 82032040 | 441  | CarSat1 | red    | na |
| chrUn | 82032067 | 82034770 | 2704 | CarSat1 | red    | na |
| chrUn | 82045763 | 82048824 | 3062 | Carsat2 | orange | na |
| chrUn | 82050302 | 82053679 | 3378 | SAT1_CF | blue   | na |
| chrUn | 82053706 | 82054207 | 502  | SAT1_CF | blue   | na |
| chrUn | 82054252 | 82054409 | 158  | SAT1_CF | blue   | na |
| chrUn | 82054437 | 82055962 | 1526 | SAT1_CF | blue   | na |
| chrUn | 82055975 | 82056516 | 542  | SAT1_CF | blue   | na |
| chrUn | 82064838 | 82065917 | 1080 | CarSat1 | red    | na |
| chrUn | 82065938 | 82068373 | 2436 | CarSat1 | red    | na |
| chrUn | 82068398 | 82069846 | 1449 | CarSat1 | red    | na |
| chrUn | 82069871 | 82071067 | 1197 | CarSat1 | red    | na |
| chrUn | 82086605 | 82087403 | 799  | CarSat1 | red    | na |
| chrUn | 82087415 | 82089374 | 1960 | CarSat1 | red    | na |
| chrUn | 82089411 | 82090345 | 935  | CarSat1 | red    | na |
| chrUn | 82090357 | 82091075 | 719  | CarSat1 | red    | na |
| chrUn | 82091099 | 82091599 | 501  | CarSat1 | red    | na |
| chrUn | 82091614 | 82092854 | 1241 | CarSat1 | red    | na |
| chrUn | 82093881 | 82097716 | 3836 | CarSat1 | red    | na |
| chrUn | 82097741 | 82099441 | 1701 | CarSat1 | red    | na |
| chrUn | 82099468 | 82100111 | 644  | CarSat1 | red    | na |
| chrUn | 82101125 | 82103762 | 2638 | CarSat1 | red    | na |
| chrUn | 82103798 | 82104775 | 978  | CarSat1 | red    | na |
| chrUn | 82104802 | 82105754 | 953  | CarSat1 | red    | na |
| chrUn | 82105779 | 82106247 | 469  | CarSat1 | red    | na |
| chrUn | 82106274 | 82107365 | 1092 | CarSat1 | red    | na |
| chrUn | 82115622 | 82116333 | 712  | CarSat1 | red    | na |
| chrUn | 82116348 | 82116475 | 128  | Carsat2 | orange | na |
| chrUn | 82116363 | 82117812 | 1450 | CarSat1 | red    | na |
| chrUn | 82117827 | 82117953 | 127  | Carsat2 | orange | na |
| chrUn | 82117842 | 82121859 | 4018 | CarSat1 | red    | na |
| chrUn | 82130220 | 82130386 | 167  | Sat2CF  | purple | na |
| chrUn | 82130224 | 82131187 | 964  | Sat2CF  | purple | na |
| chrUn | 82144591 | 82145415 | 825  | CarSat1 | red    | na |
| chrUn | 82145442 | 82145904 | 463  | CarSat1 | red    | na |
| chrUn | 82145937 | 82146423 | 487  | CarSat1 | red    | na |



|       |          |          |      |         |        |    |
|-------|----------|----------|------|---------|--------|----|
| chrUn | 82146453 | 82148366 | 1914 | CarSat1 | red    | na |
| chrUn | 82148393 | 82149104 | 712  | CarSat1 | red    | na |
| chrUn | 82149131 | 82150829 | 1699 | CarSat1 | red    | na |
| chrUn | 82151829 | 82152820 | 992  | CarSat1 | red    | na |
| chrUn | 82152844 | 82154311 | 1468 | CarSat1 | red    | na |
| chrUn | 82154323 | 82154823 | 501  | CarSat1 | red    | na |
| chrUn | 82154838 | 82155282 | 445  | CarSat1 | red    | na |
| chrUn | 82155303 | 82158029 | 2727 | CarSat1 | red    | na |
| chrUn | 82159064 | 82159149 | 86   | Carsat2 | orange | na |
| chrUn | 82159081 | 82161201 | 2121 | CarSat1 | red    | na |
| chrUn | 82161228 | 82162677 | 1450 | CarSat1 | red    | na |
| chrUn | 82162704 | 82163664 | 961  | CarSat1 | red    | na |
| chrUn | 82163680 | 82164400 | 721  | CarSat1 | red    | na |
| chrUn | 82164416 | 82165297 | 882  | CarSat1 | red    | na |
| chrUn | 82166364 | 82167812 | 1449 | CarSat1 | red    | na |
| chrUn | 82167839 | 82168548 | 710  | CarSat1 | red    | na |
| chrUn | 82168575 | 82170273 | 1699 | CarSat1 | red    | na |
| chrUn | 82170298 | 82170758 | 461  | CarSat1 | red    | na |
| chrUn | 82170785 | 82171495 | 711  | CarSat1 | red    | na |
| chrUn | 82171522 | 82172389 | 868  | CarSat1 | red    | na |
| chrUn | 82173643 | 82176177 | 2535 | CarSat1 | red    | na |
| chrUn | 82176204 | 82176644 | 441  | CarSat1 | red    | na |
| chrUn | 82176674 | 82177902 | 1229 | CarSat1 | red    | na |
| chrUn | 82177918 | 82179734 | 1817 | CarSat1 | red    | na |
| chrUn | 82180758 | 82182003 | 1246 | CarSat1 | red    | na |
| chrUn | 82182030 | 82183179 | 1150 | CarSat1 | red    | na |
| chrUn | 82183366 | 82184421 | 1056 | CarSat1 | red    | na |
| chrUn | 82184448 | 82185159 | 712  | CarSat1 | red    | na |
| chrUn | 82185186 | 82185894 | 709  | CarSat1 | red    | na |
| chrUn | 82185921 | 82186982 | 1062 | CarSat1 | red    | na |
| chrUn | 82188026 | 82192174 | 4149 | CarSat1 | red    | na |
| chrUn | 82192201 | 82192910 | 710  | CarSat1 | red    | na |
| chrUn | 82192937 | 82194205 | 1269 | CarSat1 | red    | na |
| chrUn | 82195215 | 82196054 | 840  | CarSat1 | red    | na |
| chrUn | 82196079 | 82196546 | 468  | CarSat1 | red    | na |
| chrUn | 82196573 | 82198021 | 1449 | CarSat1 | red    | na |
| chrUn | 82198048 | 82198758 | 711  | CarSat1 | red    | na |
| chrUn | 82198785 | 82199495 | 711  | CarSat1 | red    | na |
| chrUn | 82199533 | 82200232 | 700  | CarSat1 | red    | na |
| chrUn | 82200259 | 82201436 | 1178 | CarSat1 | red    | na |
| chrUn | 82202445 | 82202906 | 462  | CarSat1 | red    | na |
| chrUn | 82202933 | 82204378 | 1446 | CarSat1 | red    | na |

|       |          |          |      |         |     |    |
|-------|----------|----------|------|---------|-----|----|
| chrUn | 82204405 | 82205358 | 954  | CarSat1 | red | na |
| chrUn | 82205383 | 82205852 | 470  | CarSat1 | red | na |
| chrUn | 82205879 | 82208062 | 2184 | CarSat1 | red | na |
| chrUn | 82208089 | 82208660 | 572  | CarSat1 | red | na |
| chrUn | 82216891 | 82218581 | 1691 | CarSat1 | red | na |
| chrUn | 82218597 | 82219065 | 469  | CarSat1 | red | na |
| chrUn | 82219092 | 82219802 | 711  | CarSat1 | red | na |
| chrUn | 82219829 | 82220790 | 962  | CarSat1 | red | na |
| chrUn | 82220806 | 82222012 | 1207 | CarSat1 | red | na |
| chrUn | 82222039 | 82223109 | 1071 | CarSat1 | red | na |
| chrUn | 82224113 | 82225162 | 1050 | CarSat1 | red | na |
| chrUn | 82225187 | 82226392 | 1206 | CarSat1 | red | na |
| chrUn | 82226419 | 82227380 | 962  | CarSat1 | red | na |
| chrUn | 82227396 | 82228107 | 712  | CarSat1 | red | na |
| chrUn | 82228133 | 82229337 | 1205 | CarSat1 | red | na |
| chrUn | 82229364 | 82230328 | 965  | CarSat1 | red | na |
| chrUn | 82236635 | 82237551 | 917  | CarSat1 | red | na |
| chrUn | 82238551 | 82239099 | 549  | CarSat1 | red | na |
| chrUn | 82239141 | 82240838 | 1698 | CarSat1 | red | na |
| chrUn | 82240868 | 82241539 | 672  | CarSat1 | red | na |
| chrUn | 82241728 | 82241789 | 62   | CarSat1 | red | na |
| chrUn | 82241819 | 82244024 | 2206 | CarSat1 | red | na |
| chrUn | 82244039 | 82244764 | 726  | CarSat1 | red | na |
| chrUn | 82245772 | 82248100 | 2329 | CarSat1 | red | na |
| chrUn | 82248131 | 82249722 | 1592 | CarSat1 | red | na |
| chrUn | 82249753 | 82251345 | 1593 | CarSat1 | red | na |
| chrUn | 82251376 | 82251988 | 613  | CarSat1 | red | na |
| chrUn | 82260217 | 82260726 | 510  | CarSat1 | red | na |
| chrUn | 82260741 | 82263138 | 2398 | CarSat1 | red | na |
| chrUn | 82263163 | 82264623 | 1461 | CarSat1 | red | na |
| chrUn | 82264639 | 82265602 | 964  | CarSat1 | red | na |
| chrUn | 82265628 | 82266345 | 718  | CarSat1 | red | na |
| chrUn | 82274703 | 82276299 | 1597 | CarSat1 | red | na |
| chrUn | 82276453 | 82277918 | 1466 | CarSat1 | red | na |
| chrUn | 82277939 | 82278512 | 574  | CarSat1 | red | na |
| chrUn | 82281822 | 82283113 | 1292 | CarSat1 | red | na |
| chrUn | 82283143 | 82285323 | 2181 | CarSat1 | red | na |
| chrUn | 82285353 | 82287535 | 2183 | CarSat1 | red | na |
| chrUn | 82287565 | 82288010 | 446  | CarSat1 | red | na |
| chrUn | 82296224 | 82299774 | 3551 | CarSat1 | red | na |
| chrUn | 82299801 | 82301493 | 1693 | CarSat1 | red | na |
| chrUn | 82301518 | 82302412 | 895  | CarSat1 | red | na |

|       |          |          |      |         |        |    |
|-------|----------|----------|------|---------|--------|----|
| chrUn | 82310608 | 82313860 | 3253 | CarSat1 | red    | na |
| chrUn | 82313885 | 82315353 | 1469 | CarSat1 | red    | na |
| chrUn | 82315380 | 82316092 | 713  | CarSat1 | red    | na |
| chrUn | 82316119 | 82316786 | 668  | CarSat1 | red    | na |
| chrUn | 82317871 | 82319698 | 1828 | CarSat1 | red    | na |
| chrUn | 82319730 | 82320660 | 931  | CarSat1 | red    | na |
| chrUn | 82320690 | 82323205 | 2516 | CarSat1 | red    | na |
| chrUn | 82323234 | 82323627 | 394  | CarSat1 | red    | na |
| chrUn | 82323658 | 82323942 | 285  | SAT1_CF | blue   | na |
| chrUn | 82324998 | 82325578 | 581  | CarSat1 | red    | na |
| chrUn | 82325608 | 82327789 | 2182 | CarSat1 | red    | na |
| chrUn | 82327819 | 82329263 | 1445 | CarSat1 | red    | na |
| chrUn | 82329278 | 82329404 | 127  | Carsat2 | orange | na |
| chrUn | 82329293 | 82330514 | 1222 | CarSat1 | red    | na |
| chrUn | 82330538 | 82331163 | 626  | CarSat1 | red    | na |
| chrUn | 82332163 | 82334275 | 2113 | CarSat1 | red    | na |
| chrUn | 82334291 | 82337223 | 2933 | CarSat1 | red    | na |
| chrUn | 82337239 | 82338336 | 1098 | CarSat1 | red    | na |
| chrUn | 82339390 | 82339825 | 436  | CarSat1 | red    | na |
| chrUn | 82339846 | 82341300 | 1455 | CarSat1 | red    | na |
| chrUn | 82341327 | 82341767 | 441  | CarSat1 | red    | na |
| chrUn | 82341797 | 82343023 | 1227 | CarSat1 | red    | na |
| chrUn | 82343039 | 82343758 | 720  | CarSat1 | red    | na |
| chrUn | 82343774 | 82344484 | 711  | CarSat1 | red    | na |
| chrUn | 82344509 | 82345521 | 1013 | CarSat1 | red    | na |
| chrUn | 82346546 | 82347693 | 1148 | CarSat1 | red    | na |
| chrUn | 82347723 | 82348431 | 709  | CarSat1 | red    | na |
| chrUn | 82348462 | 82350128 | 1667 | CarSat1 | red    | na |
| chrUn | 82350144 | 82351837 | 1694 | CarSat1 | red    | na |
| chrUn | 82351864 | 82352710 | 847  | CarSat1 | red    | na |
| chrUn | 82356012 | 82356647 | 636  | Sat7CF  | lime   | na |
| chrUn | 82356093 | 82356647 | 555  | Sat7CF  | lime   | na |
| chrUn | 82363422 | 82365172 | 1751 | CarSat1 | red    | na |
| chrUn | 82365202 | 82365909 | 708  | CarSat1 | red    | na |
| chrUn | 82365924 | 82366047 | 124  | Carsat2 | orange | na |
| chrUn | 82365939 | 82366918 | 980  | CarSat1 | red    | na |
| chrUn | 82366945 | 82367647 | 703  | CarSat1 | red    | na |
| chrUn | 82367673 | 82368117 | 445  | CarSat1 | red    | na |
| chrUn | 82368147 | 82369590 | 1444 | CarSat1 | red    | na |
| chrUn | 82370600 | 82371509 | 910  | CarSat1 | red    | na |
| chrUn | 82371536 | 82372245 | 710  | CarSat1 | red    | na |
| chrUn | 82372272 | 82373234 | 963  | CarSat1 | red    | na |

|       |          |          |      |         |      |    |
|-------|----------|----------|------|---------|------|----|
| chrUn | 82373259 | 82374456 | 1198 | CarSat1 | red  | na |
| chrUn | 82374483 | 82376774 | 2292 | CarSat1 | red  | na |
| chrUn | 82377779 | 82378371 | 593  | SAT1_CF | blue | na |
| chrUn | 82378422 | 82379010 | 589  | SAT1_CF | blue | na |
| chrUn | 82379035 | 82380048 | 1014 | SAT1_CF | blue | na |
| chrUn | 82380135 | 82380697 | 563  | SAT1_CF | blue | na |
| chrUn | 82380715 | 82381185 | 471  | SAT1_CF | blue | na |
| chrUn | 82381264 | 82381775 | 512  | SAT1_CF | blue | na |
| chrUn | 82381872 | 82383009 | 1138 | SAT1_CF | blue | na |
| chrUn | 82383069 | 82383549 | 481  | SAT1_CF | blue | na |
| chrUn | 82383562 | 82383952 | 391  | SAT1_CF | blue | na |
| chrUn | 82392130 | 82394857 | 2728 | CarSat1 | red  | na |
| chrUn | 82394884 | 82396581 | 1698 | CarSat1 | red  | na |
| chrUn | 82396606 | 82397802 | 1197 | CarSat1 | red  | na |
| chrUn | 82397829 | 82398290 | 462  | CarSat1 | red  | na |
| chrUn | 82408065 | 82408220 | 156  | SAT1_CF | blue | na |
| chrUn | 82409845 | 82410662 | 818  | CarSat1 | red  | na |
| chrUn | 82410689 | 82411400 | 712  | CarSat1 | red  | na |
| chrUn | 82411427 | 82412137 | 711  | CarSat1 | red  | na |
| chrUn | 82412164 | 82412875 | 712  | CarSat1 | red  | na |
| chrUn | 82412902 | 82413613 | 712  | CarSat1 | red  | na |
| chrUn | 82413640 | 82416010 | 2371 | CarSat1 | red  | na |
| chrUn | 82424177 | 82425513 | 1337 | SAT1_CF | blue | na |
| chrUn | 82425557 | 82426832 | 1276 | SAT1_CF | blue | na |
| chrUn | 82426852 | 82429229 | 2378 | SAT1_CF | blue | na |
| chrUn | 82429248 | 82430292 | 1045 | SAT1_CF | blue | na |
| chrUn | 82431338 | 82432357 | 1020 | CarSat1 | red  | na |
| chrUn | 82432384 | 82433591 | 1208 | CarSat1 | red  | na |
| chrUn | 82433607 | 82434569 | 963  | CarSat1 | red  | na |
| chrUn | 82434596 | 82435307 | 712  | CarSat1 | red  | na |
| chrUn | 82435334 | 82436532 | 1199 | CarSat1 | red  | na |
| chrUn | 82436557 | 82437495 | 939  | CarSat1 | red  | na |
| chrUn | 82438496 | 82441331 | 2836 | CarSat1 | red  | na |
| chrUn | 82441351 | 82442329 | 979  | CarSat1 | red  | na |
| chrUn | 82442359 | 82443541 | 1183 | CarSat1 | red  | na |
| chrUn | 82443562 | 82444507 | 946  | CarSat1 | red  | na |
| chrUn | 82445650 | 82447483 | 1834 | CarSat1 | red  | na |
| chrUn | 82447499 | 82448701 | 1203 | CarSat1 | red  | na |
| chrUn | 82448728 | 82451787 | 3060 | CarSat1 | red  | na |
| chrUn | 82452801 | 82453444 | 644  | CarSat1 | red  | na |
| chrUn | 82453471 | 82454181 | 711  | CarSat1 | red  | na |
| chrUn | 82454210 | 82455170 | 961  | CarSat1 | red  | na |

|       |          |          |      |         |        |    |
|-------|----------|----------|------|---------|--------|----|
| chrUn | 82455186 | 82456391 | 1206 | CarSat1 | red    | na |
| chrUn | 82456418 | 82457381 | 964  | CarSat1 | red    | na |
| chrUn | 82457397 | 82458938 | 1542 | CarSat1 | red    | na |
| chrUn | 82459949 | 82461046 | 1098 | CarSat1 | red    | na |
| chrUn | 82461071 | 82461773 | 703  | CarSat1 | red    | na |
| chrUn | 82461799 | 82462268 | 470  | CarSat1 | red    | na |
| chrUn | 82462295 | 82463005 | 711  | CarSat1 | red    | na |
| chrUn | 82463032 | 82464479 | 1448 | CarSat1 | red    | na |
| chrUn | 82464506 | 82465216 | 711  | CarSat1 | red    | na |
| chrUn | 82465243 | 82466074 | 832  | CarSat1 | red    | na |
| chrUn | 82467860 | 82468329 | 470  | CarSat1 | red    | na |
| chrUn | 82468345 | 82469066 | 722  | CarSat1 | red    | na |
| chrUn | 82469080 | 82469802 | 723  | CarSat1 | red    | na |
| chrUn | 82469816 | 82470538 | 723  | CarSat1 | red    | na |
| chrUn | 82470552 | 82472009 | 1458 | CarSat1 | red    | na |
| chrUn | 82472034 | 82472688 | 655  | CarSat1 | red    | na |
| chrUn | 82472913 | 82473218 | 306  | CarSat1 | red    | na |
| chrUn | 82481384 | 82482681 | 1298 | CarSat1 | red    | na |
| chrUn | 82482711 | 82484421 | 1711 | CarSat1 | red    | na |
| chrUn | 82484442 | 82485398 | 957  | CarSat1 | red    | na |
| chrUn | 82485423 | 82486884 | 1462 | CarSat1 | red    | na |
| chrUn | 82486909 | 82487528 | 620  | CarSat1 | red    | na |
| chrUn | 82502817 | 82503338 | 522  | CarSat1 | red    | na |
| chrUn | 82503359 | 82503828 | 470  | CarSat1 | red    | na |
| chrUn | 82503853 | 82504563 | 711  | CarSat1 | red    | na |
| chrUn | 82504588 | 82507282 | 2695 | CarSat1 | red    | na |
| chrUn | 82507319 | 82508237 | 919  | CarSat1 | red    | na |
| chrUn | 82508262 | 82508949 | 688  | CarSat1 | red    | na |
| chrUn | 82509956 | 82511450 | 1495 | CarSat1 | red    | na |
| chrUn | 82511474 | 82512932 | 1459 | CarSat1 | red    | na |
| chrUn | 82512957 | 82513660 | 704  | CarSat1 | red    | na |
| chrUn | 82513685 | 82514407 | 723  | CarSat1 | red    | na |
| chrUn | 82514432 | 82516090 | 1659 | CarSat1 | red    | na |
| chrUn | 82517095 | 82517893 | 799  | CarSat1 | red    | na |
| chrUn | 82517908 | 82518035 | 128  | Carsat2 | orange | na |
| chrUn | 82517923 | 82518817 | 895  | CarSat1 | red    | na |
| chrUn | 82520174 | 82520799 | 626  | CarSat1 | red    | na |
| chrUn | 82520829 | 82521537 | 709  | CarSat1 | red    | na |
| chrUn | 82521568 | 82522753 | 1186 | CarSat1 | red    | na |
| chrUn | 82523553 | 82525278 | 1726 | CarSat1 | red    | na |
| chrUn | 82533431 | 82539552 | 6122 | CarSat1 | red    | na |
| chrUn | 82540592 | 82542715 | 2124 | CarSat1 | red    | na |

|       |          |          |      |         |      |    |
|-------|----------|----------|------|---------|------|----|
| chrUn | 82542746 | 82544333 | 1588 | CarSat1 | red  | na |
| chrUn | 82544364 | 82545961 | 1598 | CarSat1 | red  | na |
| chrUn | 82545982 | 82546688 | 707  | CarSat1 | red  | na |
| chrUn | 82547692 | 82549005 | 1314 | CarSat1 | red  | na |
| chrUn | 82549030 | 82552436 | 3407 | CarSat1 | red  | na |
| chrUn | 82552463 | 82553817 | 1355 | CarSat1 | red  | na |
| chrUn | 82561948 | 82563156 | 1209 | SAT1_CF | blue | na |
| chrUn | 82563168 | 82563723 | 556  | SAT1_CF | blue | na |
| chrUn | 82563802 | 82564139 | 338  | SAT1_CF | blue | na |
| chrUn | 82564192 | 82564645 | 454  | SAT1_CF | blue | na |
| chrUn | 82564656 | 82565209 | 554  | SAT1_CF | blue | na |
| chrUn | 82565278 | 82565835 | 558  | SAT1_CF | blue | na |
| chrUn | 82565897 | 82566456 | 560  | SAT1_CF | blue | na |
| chrUn | 82566516 | 82568074 | 1559 | SAT1_CF | blue | na |
| chrUn | 82584103 | 82586191 | 2089 | SAT1_CF | blue | na |
| chrUn | 82586211 | 82586320 | 110  | SAT1_CF | blue | na |
| chrUn | 82586333 | 82586996 | 664  | SAT1_CF | blue | na |
| chrUn | 82587040 | 82587999 | 960  | SAT1_CF | blue | na |
| chrUn | 82588042 | 82588707 | 666  | SAT1_CF | blue | na |
| chrUn | 82588719 | 82589433 | 715  | SAT1_CF | blue | na |
| chrUn | 82590439 | 82591766 | 1328 | CarSat1 | red  | na |
| chrUn | 82591791 | 82592502 | 712  | CarSat1 | red  | na |
| chrUn | 82592518 | 82594714 | 2197 | CarSat1 | red  | na |
| chrUn | 82594730 | 82595199 | 470  | CarSat1 | red  | na |
| chrUn | 82595226 | 82595933 | 708  | CarSat1 | red  | na |
| chrUn | 82595960 | 82596546 | 587  | CarSat1 | red  | na |
| chrUn | 82597555 | 82598383 | 829  | CarSat1 | red  | na |
| chrUn | 82598399 | 82599362 | 964  | CarSat1 | red  | na |
| chrUn | 82599389 | 82602071 | 2683 | CarSat1 | red  | na |
| chrUn | 82602087 | 82602809 | 723  | CarSat1 | red  | na |
| chrUn | 82602825 | 82603671 | 847  | CarSat1 | red  | na |
| chrUn | 82614599 | 82616045 | 1447 | CarSat1 | red  | na |
| chrUn | 82616075 | 82616783 | 709  | CarSat1 | red  | na |
| chrUn | 82616813 | 82618041 | 1229 | CarSat1 | red  | na |
| chrUn | 82618057 | 82618778 | 722  | CarSat1 | red  | na |
| chrUn | 82618794 | 82620669 | 1876 | CarSat1 | red  | na |
| chrUn | 82621675 | 82622513 | 839  | CarSat1 | red  | na |
| chrUn | 82622540 | 82623007 | 468  | CarSat1 | red  | na |
| chrUn | 82623023 | 82623982 | 960  | CarSat1 | red  | na |
| chrUn | 82624008 | 82625212 | 1205 | CarSat1 | red  | na |
| chrUn | 82625228 | 82625950 | 723  | CarSat1 | red  | na |
| chrUn | 82625966 | 82626931 | 966  | CarSat1 | red  | na |

|       |          |          |      |         |        |    |
|-------|----------|----------|------|---------|--------|----|
| chrUn | 82626958 | 82627750 | 793  | CarSat1 | red    | na |
| chrUn | 82628776 | 82629676 | 901  | CarSat1 | red    | na |
| chrUn | 82629693 | 82629817 | 125  | Carsat2 | orange | na |
| chrUn | 82629706 | 82630191 | 486  | CarSat1 | red    | na |
| chrUn | 82630203 | 82631155 | 953  | CarSat1 | red    | na |
| chrUn | 82631185 | 82633149 | 1965 | CarSat1 | red    | na |
| chrUn | 82633182 | 82634109 | 928  | CarSat1 | red    | na |
| chrUn | 82634139 | 82634846 | 708  | CarSat1 | red    | na |
| chrUn | 82635868 | 82638496 | 2629 | CarSat1 | red    | na |
| chrUn | 82638526 | 82639012 | 487  | CarSat1 | red    | na |
| chrUn | 82639024 | 82639747 | 724  | CarSat1 | red    | na |
| chrUn | 82639780 | 82640485 | 706  | CarSat1 | red    | na |
| chrUn | 82640509 | 82641947 | 1439 | CarSat1 | red    | na |
| chrUn | 82650116 | 82651311 | 1196 | CarSat1 | red    | na |
| chrUn | 82651338 | 82652047 | 710  | CarSat1 | red    | na |
| chrUn | 82652074 | 82653773 | 1700 | CarSat1 | red    | na |
| chrUn | 82653798 | 82654258 | 461  | CarSat1 | red    | na |
| chrUn | 82654285 | 82654991 | 707  | CarSat1 | red    | na |
| chrUn | 82655018 | 82656113 | 1096 | CarSat1 | red    | na |
| chrUn | 82657121 | 82657933 | 813  | CarSat1 | red    | na |
| chrUn | 82657949 | 82658911 | 963  | CarSat1 | red    | na |
| chrUn | 82658938 | 82659406 | 469  | CarSat1 | red    | na |
| chrUn | 82659422 | 82660386 | 965  | CarSat1 | red    | na |
| chrUn | 82660413 | 82661390 | 978  | CarSat1 | red    | na |
| chrUn | 82661420 | 82662353 | 934  | CarSat1 | red    | na |
| chrUn | 82662369 | 82663174 | 806  | CarSat1 | red    | na |
| chrUn | 82664180 | 82665584 | 1405 | CarSat1 | red    | na |
| chrUn | 82665600 | 82666067 | 468  | CarSat1 | red    | na |
| chrUn | 82666094 | 82667541 | 1448 | CarSat1 | red    | na |
| chrUn | 82667568 | 82669016 | 1449 | CarSat1 | red    | na |
| chrUn | 82669043 | 82670218 | 1176 | CarSat1 | red    | na |
| chrUn | 82685365 | 82686447 | 1083 | CarSat1 | red    | na |
| chrUn | 82686474 | 82688652 | 2179 | CarSat1 | red    | na |
| chrUn | 82688679 | 82689389 | 711  | CarSat1 | red    | na |
| chrUn | 82689415 | 82690124 | 710  | CarSat1 | red    | na |
| chrUn | 82690151 | 82691411 | 1261 | CarSat1 | red    | na |
| chrUn | 82692427 | 82693264 | 838  | CarSat1 | red    | na |
| chrUn | 82693291 | 82695203 | 1913 | CarSat1 | red    | na |
| chrUn | 82695233 | 82698465 | 3233 | CarSat1 | red    | na |
| chrUn | 82699465 | 82700097 | 633  | CarSat1 | red    | na |
| chrUn | 82700124 | 82700834 | 711  | CarSat1 | red    | na |
| chrUn | 82700861 | 82701571 | 711  | CarSat1 | red    | na |

|       |          |          |      |         |        |    |
|-------|----------|----------|------|---------|--------|----|
| chrUn | 82701598 | 82702561 | 964  | CarSat1 | red    | na |
| chrUn | 82702577 | 82703783 | 1207 | CarSat1 | red    | na |
| chrUn | 82703810 | 82704519 | 710  | CarSat1 | red    | na |
| chrUn | 82704546 | 82705509 | 964  | CarSat1 | red    | na |
| chrUn | 82706522 | 82707857 | 1336 | CarSat1 | red    | na |
| chrUn | 82707873 | 82710584 | 2712 | CarSat1 | red    | na |
| chrUn | 82710614 | 82711826 | 1213 | CarSat1 | red    | na |
| chrUn | 82712051 | 82712561 | 511  | CarSat1 | red    | na |
| chrUn | 82713663 | 82714374 | 712  | CarSat1 | red    | na |
| chrUn | 82714401 | 82715846 | 1446 | CarSat1 | red    | na |
| chrUn | 82715873 | 82718059 | 2187 | CarSat1 | red    | na |
| chrUn | 82718084 | 82718795 | 712  | CarSat1 | red    | na |
| chrUn | 82718822 | 82719605 | 784  | CarSat1 | red    | na |
| chrUn | 82727658 | 82728511 | 854  | CarSat1 | red    | na |
| chrUn | 82728527 | 82729573 | 1047 | CarSat1 | red    | na |
| chrUn | 82729594 | 82731105 | 1512 | CarSat1 | red    | na |
| chrUn | 82731132 | 82731839 | 708  | CarSat1 | red    | na |
| chrUn | 82731866 | 82732576 | 711  | CarSat1 | red    | na |
| chrUn | 82732603 | 82733688 | 1086 | CarSat1 | red    | na |
| chrUn | 82734699 | 82735683 | 985  | CarSat1 | red    | na |
| chrUn | 82735713 | 82737895 | 2183 | CarSat1 | red    | na |
| chrUn | 82737909 | 82738035 | 127  | Carsat2 | orange | na |
| chrUn | 82737924 | 82740111 | 2188 | CarSat1 | red    | na |
| chrUn | 82740126 | 82740252 | 127  | Carsat2 | orange | na |
| chrUn | 82740141 | 82740741 | 601  | CarSat1 | red    | na |
| chrUn | 82748802 | 82748946 | 145  | Carsat2 | orange | na |
| chrUn | 82748818 | 82750325 | 1508 | CarSat1 | red    | na |
| chrUn | 82750341 | 82750809 | 469  | CarSat1 | red    | na |
| chrUn | 82750836 | 82753020 | 2185 | CarSat1 | red    | na |
| chrUn | 82753047 | 82753757 | 711  | CarSat1 | red    | na |
| chrUn | 82753784 | 82754817 | 1034 | CarSat1 | red    | na |
| chrUn | 82755819 | 82757364 | 1546 | CarSat1 | red    | na |
| chrUn | 82757394 | 82758373 | 980  | CarSat1 | red    | na |
| chrUn | 82758394 | 82759846 | 1453 | CarSat1 | red    | na |
| chrUn | 82759873 | 82760585 | 713  | CarSat1 | red    | na |
| chrUn | 82760612 | 82761321 | 710  | CarSat1 | red    | na |
| chrUn | 82761350 | 82761841 | 492  | CarSat1 | red    | na |
| chrUn | 82762875 | 82763840 | 966  | CarSat1 | red    | na |
| chrUn | 82763867 | 82764578 | 712  | CarSat1 | red    | na |
| chrUn | 82764605 | 82765315 | 711  | CarSat1 | red    | na |
| chrUn | 82765342 | 82766548 | 1207 | CarSat1 | red    | na |
| chrUn | 82766564 | 82768260 | 1697 | CarSat1 | red    | na |



|       |          |          |              |        |    |
|-------|----------|----------|--------------|--------|----|
| chrUn | 82768287 | 82768886 | 600 CarSat1  | red    | na |
| chrUn | 82772107 | 82772810 | 704 CarSat1  | red    | na |
| chrUn | 82772832 | 82774801 | 1970 CarSat1 | red    | na |
| chrUn | 82774803 | 82775858 | 1056 SAT1_CF | blue   | na |
| chrUn | 82776931 | 82778225 | 1295 CarSat1 | red    | na |
| chrUn | 82778241 | 82780644 | 2404 CarSat1 | red    | na |
| chrUn | 82780674 | 82782940 | 2267 CarSat1 | red    | na |
| chrUn | 82783962 | 82787431 | 3470 CarSat1 | red    | na |
| chrUn | 82787458 | 82788169 | 712 CarSat1  | red    | na |
| chrUn | 82788196 | 82788664 | 469 CarSat1  | red    | na |
| chrUn | 82788680 | 82789344 | 665 CarSat1  | red    | na |
| chrUn | 82789525 | 82789610 | 86 CarSat1   | red    | na |
| chrUn | 82789626 | 82789987 | 362 CarSat1  | red    | na |
| chrUn | 82790992 | 82791162 | 171 CarSat1  | red    | na |
| chrUn | 82791345 | 82792494 | 1150 CarSat1 | red    | na |
| chrUn | 82792521 | 82793727 | 1207 CarSat1 | red    | na |
| chrUn | 82793743 | 82794461 | 719 CarSat1  | red    | na |
| chrUn | 82794478 | 82795198 | 721 CarSat1  | red    | na |
| chrUn | 82795215 | 82796444 | 1230 CarSat1 | red    | na |
| chrUn | 82796474 | 82796994 | 521 CarSat1  | red    | na |
| chrUn | 82798043 | 82798536 | 494 CarSat1  | red    | na |
| chrUn | 82798552 | 82799017 | 466 CarSat1  | red    | na |
| chrUn | 82799044 | 82801225 | 2182 CarSat1 | red    | na |
| chrUn | 82801252 | 82802213 | 962 CarSat1  | red    | na |
| chrUn | 82802229 | 82802699 | 471 CarSat1  | red    | na |
| chrUn | 82802726 | 82804030 | 1305 CarSat1 | red    | na |
| chrUn | 82812079 | 82812524 | 446 CarSat1  | red    | na |
| chrUn | 82812713 | 82812780 | 68 CarSat1   | red    | na |
| chrUn | 82812805 | 82813266 | 462 CarSat1  | red    | na |
| chrUn | 82813287 | 82816467 | 3181 CarSat1 | red    | na |
| chrUn | 82816483 | 82817205 | 723 CarSat1  | red    | na |
| chrUn | 82817221 | 82818051 | 831 CarSat1  | red    | na |
| chrUn | 82819061 | 82822785 | 3725 CarSat1 | red    | na |
| chrUn | 82822812 | 82824464 | 1653 CarSat1 | red    | na |
| chrUn | 82824468 | 82824591 | 124 Carsat2  | orange | na |
| chrUn | 82824528 | 82825059 | 532 CarSat1  | red    | na |
| chrUn | 82826094 | 82828348 | 2255 CarSat1 | red    | na |
| chrUn | 82828369 | 82831041 | 2673 CarSat1 | red    | na |
| chrUn | 82831066 | 82832034 | 969 CarSat1  | red    | na |
| chrUn | 82833074 | 82834123 | 1050 CarSat1 | red    | na |
| chrUn | 82834144 | 82836610 | 2467 CarSat1 | red    | na |
| chrUn | 82836627 | 82837807 | 1181 CarSat1 | red    | na |

|       |          |          |              |        |    |
|-------|----------|----------|--------------|--------|----|
| chrUn | 82837828 | 82838538 | 711 CarSat1  | red    | na |
| chrUn | 82838565 | 82839071 | 507 CarSat1  | red    | na |
| chrUn | 82848739 | 82849868 | 1130 CarSat1 | red    | na |
| chrUn | 82849884 | 82852732 | 2849 SAT1_CF | blue   | na |
| chrUn | 82866034 | 82867064 | 1031 CarSat1 | red    | na |
| chrUn | 82875054 | 82876361 | 1308 CarSat1 | red    | na |
| chrUn | 82876386 | 82877336 | 951 CarSat1  | red    | na |
| chrUn | 82877363 | 82878342 | 980 CarSat1  | red    | na |
| chrUn | 82878372 | 82880044 | 1673 CarSat1 | red    | na |
| chrUn | 82880069 | 82881027 | 959 CarSat1  | red    | na |
| chrUn | 82882088 | 82882998 | 911 CarSat1  | red    | na |
| chrUn | 82883019 | 82883735 | 717 CarSat1  | red    | na |
| chrUn | 82883756 | 82884715 | 960 CarSat1  | red    | na |
| chrUn | 82884740 | 82885460 | 721 CarSat1  | red    | na |
| chrUn | 82885485 | 82886932 | 1448 CarSat1 | red    | na |
| chrUn | 82886948 | 82888025 | 1078 CarSat1 | red    | na |
| chrUn | 82889031 | 82889129 | 99 Carsat2   | orange | na |
| chrUn | 82889049 | 82889691 | 643 CarSat1  | red    | na |
| chrUn | 82889718 | 82890426 | 709 CarSat1  | red    | na |
| chrUn | 82890447 | 82891163 | 717 CarSat1  | red    | na |
| chrUn | 82891184 | 82892152 | 969 CarSat1  | red    | na |
| chrUn | 82892177 | 82892879 | 703 CarSat1  | red    | na |
| chrUn | 82892904 | 82894362 | 1459 CarSat1 | red    | na |
| chrUn | 82894387 | 82895011 | 625 CarSat1  | red    | na |
| chrUn | 82896063 | 82896916 | 854 CarSat1  | red    | na |
| chrUn | 82896939 | 82899127 | 2189 CarSat1 | red    | na |
| chrUn | 82899152 | 82901991 | 2840 CarSat1 | red    | na |
| chrUn | 82903008 | 82903807 | 800 CarSat1  | red    | na |
| chrUn | 82903837 | 82905016 | 1180 CarSat1 | red    | na |
| chrUn | 82905037 | 82907962 | 2926 CarSat1 | red    | na |
| chrUn | 82907983 | 82908960 | 978 CarSat1  | red    | na |
| chrUn | 82916963 | 82917499 | 537 CarSat1  | red    | na |
| chrUn | 82917520 | 82918235 | 716 CarSat1  | red    | na |
| chrUn | 82918256 | 82918972 | 717 CarSat1  | red    | na |
| chrUn | 82918993 | 82919970 | 978 CarSat1  | red    | na |
| chrUn | 82920005 | 82922410 | 2406 CarSat1 | red    | na |
| chrUn | 82922435 | 82922919 | 485 CarSat1  | red    | na |
| chrUn | 82937846 | 82938328 | 483 CarSat1  | red    | na |
| chrUn | 82938353 | 82942277 | 3925 CarSat1 | red    | na |
| chrUn | 82942307 | 82943799 | 1493 CarSat1 | red    | na |
| chrUn | 82944803 | 82946842 | 2040 CarSat1 | red    | na |
| chrUn | 82946857 | 82946984 | 128 Carsat2  | orange | na |

|       |          |          |      |         |        |    |
|-------|----------|----------|------|---------|--------|----|
| chrUn | 82946872 | 82947580 | 709  | CarSat1 | red    | na |
| chrUn | 82947595 | 82947722 | 128  | Carsat2 | orange | na |
| chrUn | 82947610 | 82948322 | 713  | CarSat1 | red    | na |
| chrUn | 82948337 | 82948462 | 126  | Carsat2 | orange | na |
| chrUn | 82948352 | 82949058 | 707  | CarSat1 | red    | na |
| chrUn | 82949073 | 82949200 | 128  | Carsat2 | orange | na |
| chrUn | 82949089 | 82949796 | 708  | CarSat1 | red    | na |
| chrUn | 82949811 | 82949938 | 128  | Carsat2 | orange | na |
| chrUn | 82949826 | 82950755 | 930  | CarSat1 | red    | na |
| chrUn | 82958838 | 82959447 | 610  | CarSat1 | red    | na |
| chrUn | 82959477 | 82960413 | 937  | CarSat1 | red    | na |
| chrUn | 82960438 | 82962623 | 2186 | CarSat1 | red    | na |
| chrUn | 82962648 | 82963300 | 653  | CarSat1 | red    | na |
| chrUn | 82963533 | 82964652 | 1120 | CarSat1 | red    | na |
| chrUn | 82965690 | 82967966 | 2277 | CarSat1 | red    | na |
| chrUn | 82967991 | 82970920 | 2930 | CarSat1 | red    | na |
| chrUn | 82970936 | 82971601 | 666  | CarSat1 | red    | na |
| chrUn | 82972638 | 82976679 | 4042 | CarSat1 | red    | na |
| chrUn | 82976707 | 82978545 | 1839 | CarSat1 | red    | na |
| chrUn | 82979545 | 82980480 | 936  | CarSat1 | red    | na |
| chrUn | 82980497 | 82984406 | 3910 | CarSat1 | red    | na |
| chrUn | 82984433 | 82985484 | 1052 | CarSat1 | red    | na |
| chrUn | 82986488 | 82987397 | 910  | CarSat1 | red    | na |
| chrUn | 82987424 | 82988384 | 961  | CarSat1 | red    | na |
| chrUn | 82988400 | 82989606 | 1207 | CarSat1 | red    | na |
| chrUn | 82989633 | 82990344 | 712  | CarSat1 | red    | na |
| chrUn | 82990366 | 82992429 | 2064 | CarSat1 | red    | na |
| chrUn | 82993431 | 82995225 | 1795 | CarSat1 | red    | na |
| chrUn | 82995241 | 82996205 | 965  | CarSat1 | red    | na |
| chrUn | 82996232 | 82997943 | 1712 | CarSat1 | red    | na |
| chrUn | 82997973 | 82998685 | 713  | CarSat1 | red    | na |
| chrUn | 82998715 | 82999356 | 642  | CarSat1 | red    | na |
| chrUn | 83000375 | 83001186 | 812  | CarSat1 | red    | na |
| chrUn | 83001216 | 83003396 | 2181 | CarSat1 | red    | na |
| chrUn | 83003426 | 83004138 | 713  | CarSat1 | red    | na |
| chrUn | 83004168 | 83005611 | 1444 | CarSat1 | red    | na |
| chrUn | 83005641 | 83006295 | 655  | CarSat1 | red    | na |
| chrUn | 83007303 | 83008141 | 839  | CarSat1 | red    | na |
| chrUn | 83008168 | 83008879 | 712  | CarSat1 | red    | na |
| chrUn | 83008906 | 83009615 | 710  | CarSat1 | red    | na |
| chrUn | 83009642 | 83010352 | 711  | CarSat1 | red    | na |
| chrUn | 83010379 | 83011082 | 704  | CarSat1 | red    | na |

|       |          |          |      |         |        |    |
|-------|----------|----------|------|---------|--------|----|
| chrUn | 83011097 | 83012078 | 982  | CarSat1 | red    | na |
| chrUn | 83012094 | 83013226 | 1133 | CarSat1 | red    | na |
| chrUn | 83014338 | 83015133 | 796  | CarSat1 | red    | na |
| chrUn | 83015160 | 83017344 | 2185 | CarSat1 | red    | na |
| chrUn | 83017371 | 83018332 | 962  | CarSat1 | red    | na |
| chrUn | 83018357 | 83018817 | 461  | CarSat1 | red    | na |
| chrUn | 83018844 | 83019276 | 433  | CarSat1 | red    | na |
| chrUn | 83019320 | 83020152 | 833  | CarSat1 | red    | na |
| chrUn | 83021233 | 83022185 | 953  | CarSat1 | red    | na |
| chrUn | 83022219 | 83023415 | 1197 | CarSat1 | red    | na |
| chrUn | 83023442 | 83024148 | 707  | CarSat1 | red    | na |
| chrUn | 83024179 | 83027059 | 2881 | CarSat1 | red    | na |
| chrUn | 83028076 | 83031663 | 3588 | CarSat1 | red    | na |
| chrUn | 83031689 | 83032396 | 708  | CarSat1 | red    | na |
| chrUn | 83032423 | 83033133 | 711  | CarSat1 | red    | na |
| chrUn | 83033160 | 83033991 | 832  | CarSat1 | red    | na |
| chrUn | 83035038 | 83036728 | 1691 | CarSat1 | red    | na |
| chrUn | 83036762 | 83038211 | 1450 | CarSat1 | red    | na |
| chrUn | 83038236 | 83040169 | 1934 | CarSat1 | red    | na |
| chrUn | 83040196 | 83040635 | 440  | CarSat1 | red    | na |
| chrUn | 83041932 | 83042392 | 461  | CarSat1 | red    | na |
| chrUn | 83042419 | 83043866 | 1448 | CarSat1 | red    | na |
| chrUn | 83043895 | 83044857 | 963  | CarSat1 | red    | na |
| chrUn | 83044882 | 83046815 | 1934 | CarSat1 | red    | na |
| chrUn | 83046842 | 83047805 | 964  | CarSat1 | red    | na |
| chrUn | 83062655 | 83065300 | 2646 | CarSat1 | red    | na |
| chrUn | 83065327 | 83067509 | 2183 | CarSat1 | red    | na |
| chrUn | 83067536 | 83068514 | 979  | CarSat1 | red    | na |
| chrUn | 83069535 | 83072431 | 2897 | CarSat1 | red    | na |
| chrUn | 83072446 | 83073381 | 936  | CarSat1 | red    | na |
| chrUn | 83073406 | 83074646 | 1241 | CarSat1 | red    | na |
| chrUn | 83074661 | 83075423 | 763  | CarSat1 | red    | na |
| chrUn | 83076430 | 83078729 | 2300 | CarSat1 | red    | na |
| chrUn | 83078762 | 83079680 | 919  | CarSat1 | red    | na |
| chrUn | 83079702 | 83079828 | 127  | Carsat2 | orange | na |
| chrUn | 83079717 | 83080515 | 799  | CarSat1 | red    | na |
| chrUn | 83080704 | 83082313 | 1610 | CarSat1 | red    | na |
| chrUn | 83097099 | 83097941 | 843  | CarSat1 | red    | na |
| chrUn | 83097957 | 83098897 | 941  | CarSat1 | red    | na |
| chrUn | 83098927 | 83098988 | 62   | CarSat1 | red    | na |
| chrUn | 83099176 | 83100363 | 1188 | CarSat1 | red    | na |
| chrUn | 83100378 | 83100846 | 469  | CarSat1 | red    | na |

|       |          |          |      |         |        |    |
|-------|----------|----------|------|---------|--------|----|
| chrUn | 83100873 | 83102701 | 1829 | CarSat1 | red    | na |
| chrUn | 83103997 | 83106461 | 2465 | CarSat1 | red    | na |
| chrUn | 83106476 | 83107203 | 728  | CarSat1 | red    | na |
| chrUn | 83107218 | 83109867 | 2650 | CarSat1 | red    | na |
| chrUn | 83117767 | 83118391 | 625  | CarSat1 | red    | na |
| chrUn | 83118418 | 83120849 | 2432 | CarSat1 | red    | na |
| chrUn | 83120874 | 83122807 | 1934 | CarSat1 | red    | na |
| chrUn | 83122834 | 83123598 | 765  | CarSat1 | red    | na |
| chrUn | 83124643 | 83126792 | 2150 | CarSat1 | red    | na |
| chrUn | 83126808 | 83127529 | 722  | CarSat1 | red    | na |
| chrUn | 83127545 | 83128509 | 965  | CarSat1 | red    | na |
| chrUn | 83128536 | 83130478 | 1943 | CarSat1 | red    | na |
| chrUn | 83131500 | 83132358 | 859  | CarSat1 | red    | na |
| chrUn | 83132385 | 83133352 | 968  | CarSat1 | red    | na |
| chrUn | 83133395 | 83134331 | 937  | CarSat1 | red    | na |
| chrUn | 83134347 | 83135309 | 963  | CarSat1 | red    | na |
| chrUn | 83135336 | 83136784 | 1449 | CarSat1 | red    | na |
| chrUn | 83138376 | 83139635 | 1260 | CarSat1 | red    | na |
| chrUn | 83139662 | 83141111 | 1450 | CarSat1 | red    | na |
| chrUn | 83141138 | 83142116 | 979  | CarSat1 | red    | na |
| chrUn | 83142152 | 83143081 | 930  | CarSat1 | red    | na |
| chrUn | 83143097 | 83144240 | 1144 | CarSat1 | red    | na |
| chrUn | 83145243 | 83146581 | 1339 | CarSat1 | red    | na |
| chrUn | 83146605 | 83146732 | 128  | Carsat2 | orange | na |
| chrUn | 83146620 | 83147328 | 709  | CarSat1 | red    | na |
| chrUn | 83147344 | 83147458 | 115  | Carsat2 | orange | na |
| chrUn | 83147358 | 83149538 | 2181 | CarSat1 | red    | na |
| chrUn | 83149568 | 83151031 | 1464 | CarSat1 | red    | na |
| chrUn | 83152126 | 83154306 | 2181 | CarSat1 | red    | na |
| chrUn | 83154327 | 83155491 | 1165 | CarSat1 | red    | na |
| chrUn | 83155538 | 83156511 | 974  | CarSat1 | red    | na |
| chrUn | 83156532 | 83157246 | 715  | CarSat1 | red    | na |
| chrUn | 83157267 | 83157738 | 472  | CarSat1 | red    | na |
| chrUn | 83158972 | 83159640 | 669  | CarSat1 | red    | na |
| chrUn | 83159667 | 83160642 | 976  | CarSat1 | red    | na |
| chrUn | 83160678 | 83161596 | 919  | CarSat1 | red    | na |
| chrUn | 83161621 | 83162582 | 962  | CarSat1 | red    | na |
| chrUn | 83162611 | 83163322 | 712  | CarSat1 | red    | na |
| chrUn | 83163349 | 83164057 | 709  | CarSat1 | red    | na |
| chrUn | 83164084 | 83164722 | 639  | CarSat1 | red    | na |
| chrUn | 83172686 | 83173540 | 855  | CarSat1 | red    | na |
| chrUn | 83173577 | 83174506 | 930  | CarSat1 | red    | na |

|       |          |          |      |         |      |    |
|-------|----------|----------|------|---------|------|----|
| chrUn | 83174531 | 83175982 | 1452 | CarSat1 | red  | na |
| chrUn | 83176007 | 83177456 | 1450 | CarSat1 | red  | na |
| chrUn | 83177481 | 83178518 | 1038 | CarSat1 | red  | na |
| chrUn | 83179655 | 83180607 | 953  | CarSat1 | red  | na |
| chrUn | 83180632 | 83181833 | 1202 | CarSat1 | red  | na |
| chrUn | 83181864 | 83182828 | 965  | CarSat1 | red  | na |
| chrUn | 83182853 | 83183556 | 704  | CarSat1 | red  | na |
| chrUn | 83183581 | 83185376 | 1796 | CarSat1 | red  | na |
| chrUn | 83193244 | 83194927 | 1684 | CarSat1 | red  | na |
| chrUn | 83194952 | 83196159 | 1208 | CarSat1 | red  | na |
| chrUn | 83196186 | 83196894 | 709  | CarSat1 | red  | na |
| chrUn | 83196921 | 83197548 | 628  | CarSat1 | red  | na |
| chrUn | 83197694 | 83199080 | 1387 | CarSat1 | red  | na |
| chrUn | 83204105 | 83204420 | 316  | SAT1_CF | blue | na |
| chrUn | 83206967 | 83207913 | 947  | CarSat1 | red  | na |
| chrUn | 83207928 | 83210738 | 2811 | CarSat1 | red  | na |
| chrUn | 83210921 | 83211796 | 876  | CarSat1 | red  | na |
| chrUn | 83211826 | 83212751 | 926  | CarSat1 | red  | na |
| chrUn | 83213765 | 83215677 | 1913 | CarSat1 | red  | na |
| chrUn | 83215704 | 83216414 | 711  | CarSat1 | red  | na |
| chrUn | 83216441 | 83218385 | 1945 | CarSat1 | red  | na |
| chrUn | 83218411 | 83219603 | 1193 | CarSat1 | red  | na |
| chrUn | 83220639 | 83221284 | 646  | CarSat1 | red  | na |
| chrUn | 83221305 | 83222479 | 1175 | CarSat1 | red  | na |
| chrUn | 83222509 | 83223493 | 985  | CarSat1 | red  | na |
| chrUn | 83223514 | 83223951 | 438  | CarSat1 | red  | na |
| chrUn | 83223985 | 83224689 | 705  | CarSat1 | red  | na |
| chrUn | 83224719 | 83225420 | 702  | CarSat1 | red  | na |
| chrUn | 83225454 | 83226389 | 936  | CarSat1 | red  | na |
| chrUn | 83241092 | 83242053 | 962  | CarSat1 | red  | na |
| chrUn | 83242080 | 83242790 | 711  | CarSat1 | red  | na |
| chrUn | 83242817 | 83243527 | 711  | CarSat1 | red  | na |
| chrUn | 83243554 | 83244023 | 470  | CarSat1 | red  | na |
| chrUn | 83244048 | 83246000 | 1953 | CarSat1 | red  | na |
| chrUn | 83246034 | 83246890 | 857  | CarSat1 | red  | na |
| chrUn | 83247890 | 83250916 | 3027 | CarSat1 | red  | na |
| chrUn | 83250953 | 83253704 | 2752 | CarSat1 | red  | na |
| chrUn | 83261528 | 83264363 | 2836 | CarSat1 | red  | na |
| chrUn | 83264392 | 83265839 | 1448 | CarSat1 | red  | na |
| chrUn | 83265869 | 83266577 | 709  | CarSat1 | red  | na |
| chrUn | 83266607 | 83267315 | 709  | CarSat1 | red  | na |
| chrUn | 83268338 | 83269718 | 1381 | CarSat1 | red  | na |

|       |          |          |      |         |        |    |
|-------|----------|----------|------|---------|--------|----|
| chrUn | 83269729 | 83270924 | 1196 | CarSat1 | red    | na |
| chrUn | 83270954 | 83271661 | 708  | CarSat1 | red    | na |
| chrUn | 83271676 | 83271802 | 127  | Carsat2 | orange | na |
| chrUn | 83271691 | 83272398 | 708  | CarSat1 | red    | na |
| chrUn | 83272428 | 83273135 | 708  | CarSat1 | red    | na |
| chrUn | 83273165 | 83274107 | 943  | CarSat1 | red    | na |
| chrUn | 83300762 | 83301684 | 923  | CarSat1 | red    | na |
| chrUn | 83301698 | 83301826 | 129  | Carsat2 | orange | na |
| chrUn | 83301713 | 83302691 | 979  | CarSat1 | red    | na |
| chrUn | 83302718 | 83305639 | 2922 | CarSat1 | red    | na |
| chrUn | 83305666 | 83306524 | 859  | CarSat1 | red    | na |
| chrUn | 83307528 | 83308166 | 639  | CarSat1 | red    | na |
| chrUn | 83308181 | 83308907 | 727  | CarSat1 | red    | na |
| chrUn | 83308922 | 83310093 | 1172 | CarSat1 | red    | na |
| chrUn | 83310119 | 83311110 | 992  | CarSat1 | red    | na |
| chrUn | 83311125 | 83313308 | 2184 | CarSat1 | red    | na |
| chrUn | 83314328 | 83316955 | 2628 | CarSat1 | red    | na |
| chrUn | 83316982 | 83317383 | 402  | CarSat1 | red    | na |
| chrUn | 83328108 | 83328637 | 530  | CarSat1 | red    | na |
| chrUn | 83328664 | 83330112 | 1449 | CarSat1 | red    | na |
| chrUn | 83330139 | 83332811 | 2673 | CarSat1 | red    | na |
| chrUn | 83332836 | 83333718 | 883  | CarSat1 | red    | na |
| chrUn | 83338451 | 83338540 | 90   | Sat14CF | na     | na |
| chrUn | 83341542 | 83343502 | 1961 | CarSat1 | red    | na |
| chrUn | 83343526 | 83344240 | 715  | CarSat1 | red    | na |
| chrUn | 83344264 | 83345718 | 1455 | CarSat1 | red    | na |
| chrUn | 83345742 | 83346456 | 715  | CarSat1 | red    | na |
| chrUn | 83346480 | 83347301 | 822  | CarSat1 | red    | na |
| chrUn | 83348301 | 83349245 | 945  | CarSat1 | red    | na |
| chrUn | 83349261 | 83349729 | 469  | CarSat1 | red    | na |
| chrUn | 83349756 | 83350469 | 714  | CarSat1 | red    | na |
| chrUn | 83350494 | 83351457 | 964  | CarSat1 | red    | na |
| chrUn | 83351473 | 83352193 | 721  | CarSat1 | red    | na |
| chrUn | 83352209 | 83352678 | 470  | CarSat1 | red    | na |
| chrUn | 83352705 | 83353414 | 710  | CarSat1 | red    | na |
| chrUn | 83353441 | 83354078 | 638  | CarSat1 | red    | na |
| chrUn | 83355090 | 83357277 | 2188 | CarSat1 | red    | na |
| chrUn | 83357304 | 83358013 | 710  | CarSat1 | red    | na |
| chrUn | 83358038 | 83359488 | 1451 | CarSat1 | red    | na |
| chrUn | 83359519 | 83360853 | 1335 | CarSat1 | red    | na |
| chrUn | 83368646 | 83371468 | 2823 | CarSat1 | red    | na |
| chrUn | 83371495 | 83373679 | 2185 | CarSat1 | red    | na |

|       |          |          |      |         |        |    |
|-------|----------|----------|------|---------|--------|----|
| chrUn | 83373706 | 83374404 | 699  | CarSat1 | red    | na |
| chrUn | 83388959 | 83390398 | 1440 | CarSat1 | red    | na |
| chrUn | 83390431 | 83391873 | 1443 | CarSat1 | red    | na |
| chrUn | 83391906 | 83393889 | 1984 | CarSat1 | red    | na |
| chrUn | 83395708 | 83396512 | 805  | CarSat1 | red    | na |
| chrUn | 83397523 | 83401479 | 3957 | CarSat1 | red    | na |
| chrUn | 83401506 | 83402712 | 1207 | CarSat1 | red    | na |
| chrUn | 83402728 | 83403221 | 494  | CarSat1 | red    | na |
| chrUn | 83404286 | 83405879 | 1594 | CarSat1 | red    | na |
| chrUn | 83405904 | 83406606 | 703  | CarSat1 | red    | na |
| chrUn | 83406639 | 83407357 | 719  | CarSat1 | red    | na |
| chrUn | 83407381 | 83407866 | 486  | CarSat1 | red    | na |
| chrUn | 83407896 | 83410010 | 2115 | CarSat1 | red    | na |
| chrUn | 83411031 | 83413212 | 2182 | CarSat1 | red    | na |
| chrUn | 83413233 | 83414931 | 1699 | CarSat1 | red    | na |
| chrUn | 83414947 | 83416216 | 1270 | CarSat1 | red    | na |
| chrUn | 83416237 | 83416544 | 308  | CarSat1 | red    | na |
| chrUn | 83416558 | 83416760 | 203  | CarSat1 | red    | na |
| chrUn | 83424530 | 83426660 | 2131 | CarSat1 | red    | na |
| chrUn | 83426687 | 83427865 | 1179 | CarSat1 | red    | na |
| chrUn | 83427880 | 83428006 | 127  | Carsat2 | orange | na |
| chrUn | 83427895 | 83428605 | 711  | CarSat1 | red    | na |
| chrUn | 83428620 | 83428744 | 125  | Carsat2 | orange | na |
| chrUn | 83428635 | 83429340 | 706  | CarSat1 | red    | na |
| chrUn | 83429370 | 83430224 | 855  | CarSat1 | red    | na |
| chrUn | 83431308 | 83432669 | 1362 | CarSat1 | red    | na |
| chrUn | 83432685 | 83434145 | 1461 | CarSat1 | red    | na |
| chrUn | 83434161 | 83434882 | 722  | CarSat1 | red    | na |
| chrUn | 83434907 | 83435617 | 711  | CarSat1 | red    | na |
| chrUn | 83435633 | 83436989 | 1357 | CarSat1 | red    | na |
| chrUn | 83437991 | 83440231 | 2241 | CarSat1 | red    | na |
| chrUn | 83440247 | 83441207 | 961  | CarSat1 | red    | na |
| chrUn | 83441234 | 83442682 | 1449 | CarSat1 | red    | na |
| chrUn | 83442709 | 83443177 | 469  | CarSat1 | red    | na |
| chrUn | 83443193 | 83443686 | 494  | CarSat1 | red    | na |
| chrUn | 83451451 | 83452160 | 710  | CarSat1 | red    | na |
| chrUn | 83452190 | 83453853 | 1664 | CarSat1 | red    | na |
| chrUn | 83453886 | 83455336 | 1451 | CarSat1 | red    | na |
| chrUn | 83455360 | 83457163 | 1804 | CarSat1 | red    | na |
| chrUn | 83471597 | 83477286 | 5690 | CarSat1 | red    | na |
| chrUn | 83490120 | 83490965 | 846  | CarSat1 | red    | na |
| chrUn | 83490993 | 83491700 | 708  | CarSat1 | red    | na |



|       |          |          |      |         |        |    |
|-------|----------|----------|------|---------|--------|----|
| chrUn | 83491727 | 83492690 | 964  | CarSat1 | red    | na |
| chrUn | 83492706 | 83494902 | 2197 | CarSat1 | red    | na |
| chrUn | 83494918 | 83495830 | 913  | CarSat1 | red    | na |
| chrUn | 83496830 | 83497725 | 896  | CarSat1 | red    | na |
| chrUn | 83497755 | 83499669 | 1915 | CarSat1 | red    | na |
| chrUn | 83499696 | 83500676 | 981  | CarSat1 | red    | na |
| chrUn | 83500706 | 83502528 | 1823 | CarSat1 | red    | na |
| chrUn | 83503553 | 83505256 | 1704 | CarSat1 | red    | na |
| chrUn | 83505272 | 83507680 | 2409 | CarSat1 | red    | na |
| chrUn | 83507710 | 83509234 | 1525 | CarSat1 | red    | na |
| chrUn | 83515818 | 83515937 | 120  | SAT1_CF | blue   | na |
| chrUn | 83516940 | 83517534 | 595  | CarSat1 | red    | na |
| chrUn | 83517597 | 83518504 | 908  | CarSat1 | red    | na |
| chrUn | 83518525 | 83520110 | 1586 | CarSat1 | red    | na |
| chrUn | 83520131 | 83521751 | 1621 | CarSat1 | red    | na |
| chrUn | 83530326 | 83531173 | 848  | CarSat1 | red    | na |
| chrUn | 83531198 | 83532896 | 1699 | CarSat1 | red    | na |
| chrUn | 83532917 | 83534115 | 1199 | CarSat1 | red    | na |
| chrUn | 83534140 | 83535108 | 969  | CarSat1 | red    | na |
| chrUn | 83535129 | 83536018 | 890  | CarSat1 | red    | na |
| chrUn | 83537024 | 83539653 | 2630 | CarSat1 | red    | na |
| chrUn | 83539678 | 83540399 | 722  | CarSat1 | red    | na |
| chrUn | 83540424 | 83542703 | 2280 | CarSat1 | red    | na |
| chrUn | 83543709 | 83544391 | 683  | CarSat1 | red    | na |
| chrUn | 83544403 | 83545070 | 668  | CarSat1 | red    | na |
| chrUn | 83545136 | 83545461 | 326  | CarSat1 | red    | na |
| chrUn | 83545592 | 83546611 | 1020 | CarSat1 | red    | na |
| chrUn | 83546636 | 83548605 | 1970 | CarSat1 | red    | na |
| chrUn | 83548635 | 83549343 | 709  | CarSat1 | red    | na |
| chrUn | 83569778 | 83571956 | 2179 | CarSat1 | red    | na |
| chrUn | 83571981 | 83572450 | 470  | CarSat1 | red    | na |
| chrUn | 83572471 | 83573431 | 961  | CarSat1 | red    | na |
| chrUn | 83573456 | 83574906 | 1451 | CarSat1 | red    | na |
| chrUn | 83574931 | 83575454 | 524  | CarSat1 | red    | na |
| chrUn | 83576454 | 83577085 | 632  | CarSat1 | red    | na |
| chrUn | 83577100 | 83577226 | 127  | Carsat2 | orange | na |
| chrUn | 83577115 | 83577822 | 708  | CarSat1 | red    | na |
| chrUn | 83577838 | 83577964 | 127  | Carsat2 | orange | na |
| chrUn | 83577852 | 83578335 | 484  | CarSat1 | red    | na |
| chrUn | 83578360 | 83580769 | 2410 | CarSat1 | red    | na |
| chrUn | 83580784 | 83580911 | 128  | Carsat2 | orange | na |
| chrUn | 83580799 | 83582134 | 1336 | CarSat1 | red    | na |

|       |          |          |      |         |     |    |
|-------|----------|----------|------|---------|-----|----|
| chrUn | 83589812 | 83590496 | 685  | CarSat1 | red | na |
| chrUn | 83590543 | 83591723 | 1181 | CarSat1 | red | na |
| chrUn | 83591757 | 83593926 | 2170 | CarSat1 | red | na |
| chrUn | 83593960 | 83594668 | 709  | CarSat1 | red | na |
| chrUn | 83594698 | 83595489 | 792  | CarSat1 | red | na |
| chrUn | 83596489 | 83597327 | 839  | CarSat1 | red | na |
| chrUn | 83597348 | 83600275 | 2928 | CarSat1 | red | na |
| chrUn | 83600302 | 83602137 | 1836 | CarSat1 | red | na |
| chrUn | 83609838 | 83610993 | 1156 | CarSat1 | red | na |
| chrUn | 83611020 | 83611729 | 710  | CarSat1 | red | na |
| chrUn | 83611756 | 83612466 | 711  | CarSat1 | red | na |
| chrUn | 83612493 | 83612933 | 441  | CarSat1 | red | na |
| chrUn | 83612963 | 83613669 | 707  | CarSat1 | red | na |
| chrUn | 83613699 | 83614407 | 709  | CarSat1 | red | na |
| chrUn | 83614437 | 83615508 | 1072 | CarSat1 | red | na |
| chrUn | 83616518 | 83617292 | 775  | CarSat1 | red | na |
| chrUn | 83617307 | 83618763 | 1457 | CarSat1 | red | na |
| chrUn | 83618778 | 83619501 | 724  | CarSat1 | red | na |
| chrUn | 83619516 | 83620975 | 1460 | CarSat1 | red | na |
| chrUn | 83620990 | 83621697 | 708  | CarSat1 | red | na |
| chrUn | 83621727 | 83622175 | 449  | CarSat1 | red | na |
| chrUn | 83623193 | 83624422 | 1230 | CarSat1 | red | na |
| chrUn | 83624438 | 83624907 | 470  | CarSat1 | red | na |
| chrUn | 83624936 | 83625896 | 961  | CarSat1 | red | na |
| chrUn | 83625912 | 83626629 | 718  | CarSat1 | red | na |
| chrUn | 83626654 | 83627366 | 713  | CarSat1 | red | na |
| chrUn | 83627391 | 83628830 | 1440 | CarSat1 | red | na |
| chrUn | 83629856 | 83631551 | 1696 | CarSat1 | red | na |
| chrUn | 83631567 | 83632286 | 720  | CarSat1 | red | na |
| chrUn | 83632302 | 83632770 | 469  | CarSat1 | red | na |
| chrUn | 83632797 | 83635523 | 2727 | CarSat1 | red | na |
| chrUn | 83636585 | 83638282 | 1698 | CarSat1 | red | na |
| chrUn | 83638298 | 83639020 | 723  | CarSat1 | red | na |
| chrUn | 83639036 | 83639505 | 470  | CarSat1 | red | na |
| chrUn | 83639532 | 83640237 | 706  | CarSat1 | red | na |
| chrUn | 83640267 | 83641442 | 1176 | CarSat1 | red | na |
| chrUn | 83641473 | 83642179 | 707  | CarSat1 | red | na |
| chrUn | 83643188 | 83645181 | 1994 | CarSat1 | red | na |
| chrUn | 83645197 | 83647851 | 2655 | CarSat1 | red | na |
| chrUn | 83647878 | 83648845 | 968  | CarSat1 | red | na |
| chrUn | 83649846 | 83650698 | 853  | CarSat1 | red | na |
| chrUn | 83650725 | 83651435 | 711  | CarSat1 | red | na |

|       |          |          |      |         |        |    |
|-------|----------|----------|------|---------|--------|----|
| chrUn | 83651462 | 83652516 | 1055 | CarSat1 | red    | na |
| chrUn | 83652699 | 83653378 | 680  | CarSat1 | red    | na |
| chrUn | 83653408 | 83654344 | 937  | CarSat1 | red    | na |
| chrUn | 83654360 | 83655497 | 1138 | CarSat1 | red    | na |
| chrUn | 83656517 | 83658302 | 1786 | CarSat1 | red    | na |
| chrUn | 83658332 | 83659034 | 703  | CarSat1 | red    | na |
| chrUn | 83659064 | 83659772 | 709  | CarSat1 | red    | na |
| chrUn | 83659802 | 83660980 | 1179 | CarSat1 | red    | na |
| chrUn | 83661007 | 83662155 | 1149 | CarSat1 | red    | na |
| chrUn | 83663165 | 83664412 | 1248 | CarSat1 | red    | na |
| chrUn | 83664444 | 83664883 | 440  | CarSat1 | red    | na |
| chrUn | 83664909 | 83666622 | 1714 | CarSat1 | red    | na |
| chrUn | 83666649 | 83668347 | 1699 | CarSat1 | red    | na |
| chrUn | 83668363 | 83668797 | 435  | CarSat1 | red    | na |
| chrUn | 83676459 | 83677349 | 891  | CarSat1 | red    | na |
| chrUn | 83677379 | 83678087 | 709  | CarSat1 | red    | na |
| chrUn | 83678117 | 83679563 | 1447 | CarSat1 | red    | na |
| chrUn | 83679593 | 83680300 | 708  | CarSat1 | red    | na |
| chrUn | 83680330 | 83681036 | 707  | CarSat1 | red    | na |
| chrUn | 83681066 | 83682050 | 985  | CarSat1 | red    | na |
| chrUn | 83696392 | 83697011 | 620  | CarSat1 | red    | na |
| chrUn | 83697048 | 83699238 | 2191 | CarSat1 | red    | na |
| chrUn | 83699264 | 83700710 | 1447 | CarSat1 | red    | na |
| chrUn | 83700725 | 83701169 | 445  | CarSat1 | red    | na |
| chrUn | 83701190 | 83702027 | 838  | CarSat1 | red    | na |
| chrUn | 83703042 | 83703994 | 953  | CarSat1 | red    | na |
| chrUn | 83704030 | 83705690 | 1661 | CarSat1 | red    | na |
| chrUn | 83705715 | 83706673 | 959  | CarSat1 | red    | na |
| chrUn | 83706694 | 83707159 | 466  | CarSat1 | red    | na |
| chrUn | 83707184 | 83708631 | 1448 | CarSat1 | red    | na |
| chrUn | 83716318 | 83717366 | 1049 | CarSat1 | red    | na |
| chrUn | 83717391 | 83719053 | 1663 | CarSat1 | red    | na |
| chrUn | 83719068 | 83719194 | 127  | Carsat2 | orange | na |
| chrUn | 83719083 | 83720526 | 1444 | CarSat1 | red    | na |
| chrUn | 83720541 | 83720667 | 127  | Carsat2 | orange | na |
| chrUn | 83720556 | 83721262 | 707  | CarSat1 | red    | na |
| chrUn | 83721277 | 83721404 | 128  | Carsat2 | orange | na |
| chrUn | 83721292 | 83721917 | 626  | CarSat1 | red    | na |
| chrUn | 83726763 | 83727090 | 328  | Sat15CF | na     | na |
| chrUn | 83727205 | 83727461 | 257  | Sat15CF | na     | na |
| chrUn | 83729559 | 83731252 | 1694 | CarSat1 | red    | na |
| chrUn | 83731275 | 83733176 | 1902 | CarSat1 | red    | na |

|       |          |          |      |         |     |    |
|-------|----------|----------|------|---------|-----|----|
| chrUn | 83733203 | 83733672 | 470  | CarSat1 | red | na |
| chrUn | 83733697 | 83735138 | 1442 | CarSat1 | red | na |
| chrUn | 83742815 | 83745450 | 2636 | CarSat1 | red | na |
| chrUn | 83745475 | 83746188 | 714  | CarSat1 | red | na |
| chrUn | 83746213 | 83747177 | 965  | CarSat1 | red | na |
| chrUn | 83747204 | 83748409 | 1206 | CarSat1 | red | na |
| chrUn | 83749460 | 83750706 | 1247 | CarSat1 | red | na |
| chrUn | 83750731 | 83752191 | 1461 | CarSat1 | red | na |
| chrUn | 83752207 | 83753664 | 1458 | CarSat1 | red | na |
| chrUn | 83753680 | 83754402 | 723  | CarSat1 | red | na |
| chrUn | 83754418 | 83755044 | 627  | CarSat1 | red | na |
| chrUn | 83756047 | 83757307 | 1261 | CarSat1 | red | na |
| chrUn | 83757323 | 83758554 | 1232 | CarSat1 | red | na |
| chrUn | 83758584 | 83759764 | 1181 | CarSat1 | red | na |
| chrUn | 83759791 | 83760260 | 470  | CarSat1 | red | na |
| chrUn | 83760276 | 83761584 | 1309 | CarSat1 | red | na |
| chrUn | 83762667 | 83765198 | 2532 | CarSat1 | red | na |
| chrUn | 83765228 | 83765936 | 709  | CarSat1 | red | na |
| chrUn | 83765966 | 83766674 | 709  | CarSat1 | red | na |
| chrUn | 83766704 | 83768277 | 1574 | CarSat1 | red | na |
| chrUn | 83769394 | 83770570 | 1177 | CarSat1 | red | na |
| chrUn | 83770600 | 83771307 | 708  | CarSat1 | red | na |
| chrUn | 83771337 | 83772045 | 709  | CarSat1 | red | na |
| chrUn | 83772075 | 83773519 | 1445 | CarSat1 | red | na |
| chrUn | 83773549 | 83774255 | 707  | CarSat1 | red | na |
| chrUn | 83774286 | 83774887 | 602  | CarSat1 | red | na |
| chrUn | 83775898 | 83776513 | 616  | CarSat1 | red | na |
| chrUn | 83776529 | 83777736 | 1208 | CarSat1 | red | na |
| chrUn | 83777763 | 83778474 | 712  | CarSat1 | red | na |
| chrUn | 83778501 | 83781493 | 2993 | CarSat1 | red | na |
| chrUn | 83782552 | 83783855 | 1304 | CarSat1 | red | na |
| chrUn | 83783882 | 83784861 | 980  | CarSat1 | red | na |
| chrUn | 83784891 | 83785331 | 441  | CarSat1 | red | na |
| chrUn | 83785358 | 83786804 | 1447 | CarSat1 | red | na |
| chrUn | 83786831 | 83788116 | 1286 | CarSat1 | red | na |
| chrUn | 83815715 | 83819047 | 3333 | CarSat1 | red | na |
| chrUn | 83819072 | 83819785 | 714  | CarSat1 | red | na |
| chrUn | 83819810 | 83820520 | 711  | CarSat1 | red | na |
| chrUn | 83820545 | 83821029 | 485  | CarSat1 | red | na |
| chrUn | 83828664 | 83829339 | 676  | CarSat1 | red | na |
| chrUn | 83829366 | 83830815 | 1450 | CarSat1 | red | na |
| chrUn | 83830842 | 83832049 | 1208 | CarSat1 | red | na |

|       |          |          |      |         |        |    |
|-------|----------|----------|------|---------|--------|----|
| chrUn | 83832065 | 83832787 | 723  | CarSat1 | red    | na |
| chrUn | 83832803 | 83834227 | 1425 | CarSat1 | red    | na |
| chrUn | 83835236 | 83836556 | 1321 | CarSat1 | red    | na |
| chrUn | 83836583 | 83837291 | 709  | CarSat1 | red    | na |
| chrUn | 83837318 | 83837787 | 470  | CarSat1 | red    | na |
| chrUn | 83837803 | 83838524 | 722  | CarSat1 | red    | na |
| chrUn | 83838540 | 83839260 | 721  | CarSat1 | red    | na |
| chrUn | 83839276 | 83840239 | 964  | CarSat1 | red    | na |
| chrUn | 83840266 | 83840806 | 541  | CarSat1 | red    | na |
| chrUn | 83841818 | 83842768 | 951  | CarSat1 | red    | na |
| chrUn | 83842795 | 83843756 | 962  | CarSat1 | red    | na |
| chrUn | 83843772 | 83844492 | 721  | CarSat1 | red    | na |
| chrUn | 83844508 | 83845443 | 936  | CarSat1 | red    | na |
| chrUn | 83845455 | 83845585 | 131  | Carsat2 | orange | na |
| chrUn | 83845473 | 83847354 | 1882 | CarSat1 | red    | na |
| chrUn | 83848396 | 83848889 | 494  | CarSat1 | red    | na |
| chrUn | 83848914 | 83850007 | 1094 | CarSat1 | red    | na |
| chrUn | 83850027 | 83850992 | 966  | CarSat1 | red    | na |
| chrUn | 83851009 | 83851721 | 713  | CarSat1 | red    | na |
| chrUn | 83851754 | 83852459 | 706  | CarSat1 | red    | na |
| chrUn | 83852492 | 83853673 | 1182 | CarSat1 | red    | na |
| chrUn | 83854954 | 83855739 | 786  | CarSat1 | red    | na |
| chrUn | 83855766 | 83858192 | 2427 | CarSat1 | red    | na |
| chrUn | 83858234 | 83860523 | 2290 | CarSat1 | red    | na |
| chrUn | 83861533 | 83862306 | 774  | CarSat1 | red    | na |
| chrUn | 83862322 | 83863258 | 937  | CarSat1 | red    | na |
| chrUn | 83863288 | 83864732 | 1445 | CarSat1 | red    | na |
| chrUn | 83864762 | 83867031 | 2270 | CarSat1 | red    | na |
| chrUn | 83868081 | 83868715 | 635  | CarSat1 | red    | na |
| chrUn | 83868731 | 83869452 | 722  | CarSat1 | red    | na |
| chrUn | 83869469 | 83870432 | 964  | CarSat1 | red    | na |
| chrUn | 83870459 | 83871436 | 978  | CarSat1 | red    | na |
| chrUn | 83871466 | 83872402 | 937  | CarSat1 | red    | na |
| chrUn | 83872418 | 83873637 | 1220 | CarSat1 | red    | na |
| chrUn | 83874641 | 83875454 | 814  | CarSat1 | red    | na |
| chrUn | 83875484 | 83876463 | 980  | CarSat1 | red    | na |
| chrUn | 83876490 | 83877452 | 963  | CarSat1 | red    | na |
| chrUn | 83877477 | 83880191 | 2715 | CarSat1 | red    | na |
| chrUn | 83881212 | 83881798 | 587  | CarSat1 | red    | na |
| chrUn | 83881825 | 83882533 | 709  | CarSat1 | red    | na |
| chrUn | 83882560 | 83883271 | 712  | CarSat1 | red    | na |
| chrUn | 83883298 | 83884006 | 709  | CarSat1 | red    | na |

|       |          |          |      |         |      |    |
|-------|----------|----------|------|---------|------|----|
| chrUn | 83884033 | 83886712 | 2680 | CarSat1 | red  | na |
| chrUn | 83887749 | 83888886 | 1138 | CarSat1 | red  | na |
| chrUn | 83888902 | 83890600 | 1699 | CarSat1 | red  | na |
| chrUn | 83890627 | 83891833 | 1207 | CarSat1 | red  | na |
| chrUn | 83891849 | 83892569 | 721  | CarSat1 | red  | na |
| chrUn | 83892585 | 83893294 | 710  | CarSat1 | red  | na |
| chrUn | 83894302 | 83896045 | 1744 | SAT1_CF | blue | na |
| chrUn | 83896088 | 83897561 | 1474 | SAT1_CF | blue | na |
| chrUn | 83897577 | 83899368 | 1792 | SAT1_CF | blue | na |
| chrUn | 83899388 | 83899844 | 457  | SAT1_CF | blue | na |
| chrUn | 83907397 | 83909390 | 1994 | CarSat1 | red  | na |
| chrUn | 83909417 | 83910869 | 1453 | CarSat1 | red  | na |
| chrUn | 83910896 | 83912091 | 1196 | CarSat1 | red  | na |
| chrUn | 83912116 | 83912935 | 820  | CarSat1 | red  | na |
| chrUn | 83920489 | 83921242 | 754  | CarSat1 | red  | na |
| chrUn | 83921267 | 83921975 | 709  | CarSat1 | red  | na |
| chrUn | 83922000 | 83923203 | 1204 | CarSat1 | red  | na |
| chrUn | 83923230 | 83926032 | 2803 | CarSat1 | red  | na |
| chrUn | 83927054 | 83929381 | 2328 | CarSat1 | red  | na |
| chrUn | 83929418 | 83930131 | 714  | CarSat1 | red  | na |
| chrUn | 83930154 | 83930868 | 715  | CarSat1 | red  | na |
| chrUn | 83930883 | 83931244 | 362  | CarSat1 | red  | na |
| chrUn | 83931437 | 83931536 | 100  | CarSat1 | red  | na |
| chrUn | 83931554 | 83932150 | 597  | CarSat1 | red  | na |
| chrUn | 83933576 | 83935461 | 1886 | CarSat1 | red  | na |
| chrUn | 83935492 | 83937670 | 2179 | CarSat1 | red  | na |
| chrUn | 83937697 | 83938166 | 470  | CarSat1 | red  | na |
| chrUn | 83938191 | 83939114 | 924  | CarSat1 | red  | na |
| chrUn | 83946645 | 83949286 | 2642 | CarSat1 | red  | na |
| chrUn | 83949311 | 83950032 | 722  | CarSat1 | red  | na |
| chrUn | 83950048 | 83951291 | 1244 | CarSat1 | red  | na |
| chrUn | 83951307 | 83952167 | 861  | CarSat1 | red  | na |
| chrUn | 83953176 | 83953799 | 624  | CarSat1 | red  | na |
| chrUn | 83953815 | 83954535 | 721  | CarSat1 | red  | na |
| chrUn | 83954551 | 83957486 | 2936 | CarSat1 | red  | na |
| chrUn | 83957502 | 83958684 | 1183 | CarSat1 | red  | na |
| chrUn | 83959688 | 83961613 | 1926 | CarSat1 | red  | na |
| chrUn | 83961629 | 83962565 | 937  | CarSat1 | red  | na |
| chrUn | 83962595 | 83963825 | 1231 | CarSat1 | red  | na |
| chrUn | 83963841 | 83965208 | 1368 | CarSat1 | red  | na |
| chrUn | 83966208 | 83966721 | 514  | CarSat1 | red  | na |
| chrUn | 83966748 | 83967457 | 710  | CarSat1 | red  | na |

|       |          |          |      |         |        |    |
|-------|----------|----------|------|---------|--------|----|
| chrUn | 83967484 | 83968195 | 712  | CarSat1 | red    | na |
| chrUn | 83968222 | 83969921 | 1700 | CarSat1 | red    | na |
| chrUn | 83969937 | 83970657 | 721  | CarSat1 | red    | na |
| chrUn | 83970673 | 83971142 | 470  | CarSat1 | red    | na |
| chrUn | 83971169 | 83971723 | 555  | CarSat1 | red    | na |
| chrUn | 83972735 | 83973820 | 1086 | CarSat1 | red    | na |
| chrUn | 83973836 | 83975776 | 1941 | CarSat1 | red    | na |
| chrUn | 83975803 | 83976514 | 712  | CarSat1 | red    | na |
| chrUn | 83976541 | 83978226 | 1686 | CarSat1 | red    | na |
| chrUn | 83979227 | 83980527 | 1301 | CarSat1 | red    | na |
| chrUn | 83980561 | 83983724 | 3164 | CarSat1 | red    | na |
| chrUn | 83983751 | 83984727 | 977  | CarSat1 | red    | na |
| chrUn | 83998741 | 83999295 | 555  | CarSat1 | red    | na |
| chrUn | 83999310 | 83999436 | 127  | Carsat2 | orange | na |
| chrUn | 83999325 | 84000031 | 707  | CarSat1 | red    | na |
| chrUn | 84000046 | 84000172 | 127  | Carsat2 | orange | na |
| chrUn | 84000061 | 84001505 | 1445 | CarSat1 | red    | na |
| chrUn | 84001520 | 84001646 | 127  | Carsat2 | orange | na |
| chrUn | 84001535 | 84002972 | 1438 | CarSat1 | red    | na |
| chrUn | 84002996 | 84003122 | 127  | Carsat2 | orange | na |
| chrUn | 84003011 | 84004158 | 1148 | CarSat1 | red    | na |
| chrUn | 84005215 | 84005901 | 687  | CarSat1 | red    | na |
| chrUn | 84005922 | 84007374 | 1453 | CarSat1 | red    | na |
| chrUn | 84007401 | 84008113 | 713  | CarSat1 | red    | na |
| chrUn | 84008140 | 84010704 | 2565 | CarSat1 | red    | na |
| chrUn | 84011803 | 84013987 | 2185 | CarSat1 | red    | na |
| chrUn | 84014014 | 84014723 | 710  | CarSat1 | red    | na |
| chrUn | 84014750 | 84015460 | 711  | CarSat1 | red    | na |
| chrUn | 84015487 | 84016808 | 1322 | CarSat1 | red    | na |
| chrUn | 84024679 | 84025292 | 614  | CarSat1 | red    | na |
| chrUn | 84025319 | 84026029 | 711  | CarSat1 | red    | na |
| chrUn | 84026056 | 84028979 | 2924 | CarSat1 | red    | na |
| chrUn | 84029006 | 84030163 | 1158 | CarSat1 | red    | na |
| chrUn | 84031163 | 84031849 | 687  | CarSat1 | red    | na |
| chrUn | 84031879 | 84033325 | 1447 | CarSat1 | red    | na |
| chrUn | 84033355 | 84034078 | 724  | CarSat1 | red    | na |
| chrUn | 84034093 | 84034801 | 709  | CarSat1 | red    | na |
| chrUn | 84034831 | 84036635 | 1805 | CarSat1 | red    | na |
| chrUn | 84037650 | 84040326 | 2677 | CarSat1 | red    | na |
| chrUn | 84040353 | 84041531 | 1179 | CarSat1 | red    | na |
| chrUn | 84041561 | 84043122 | 1562 | CarSat1 | red    | na |
| chrUn | 84044143 | 84045974 | 1832 | CarSat1 | red    | na |

|       |          |          |      |         |        |    |
|-------|----------|----------|------|---------|--------|----|
| chrUn | 84046001 | 84047197 | 1197 | CarSat1 | red    | na |
| chrUn | 84047222 | 84048186 | 965  | CarSat1 | red    | na |
| chrUn | 84048213 | 84048924 | 712  | CarSat1 | red    | na |
| chrUn | 84048951 | 84049593 | 643  | CarSat1 | red    | na |
| chrUn | 84050621 | 84052236 | 1616 | CarSat1 | red    | na |
| chrUn | 84052263 | 84053710 | 1448 | CarSat1 | red    | na |
| chrUn | 84053737 | 84054197 | 461  | CarSat1 | red    | na |
| chrUn | 84054222 | 84054935 | 714  | CarSat1 | red    | na |
| chrUn | 84054960 | 84056061 | 1102 | CarSat1 | red    | na |
| chrUn | 84057110 | 84057595 | 486  | CarSat1 | red    | na |
| chrUn | 84057625 | 84061022 | 3398 | CarSat1 | red    | na |
| chrUn | 84061043 | 84062035 | 993  | CarSat1 | red    | na |
| chrUn | 84062050 | 84062502 | 453  | CarSat1 | red    | na |
| chrUn | 84063574 | 84064119 | 546  | CarSat1 | red    | na |
| chrUn | 84064144 | 84064855 | 712  | CarSat1 | red    | na |
| chrUn | 84064882 | 84068978 | 4097 | CarSat1 | red    | na |
| chrUn | 84069985 | 84070989 | 1005 | CarSat1 | red    | na |
| chrUn | 84071020 | 84072272 | 1253 | CarSat1 | red    | na |
| chrUn | 84072297 | 84073259 | 963  | CarSat1 | red    | na |
| chrUn | 84073286 | 84074081 | 796  | CarSat1 | red    | na |
| chrUn | 84074112 | 84075430 | 1319 | CarSat1 | red    | na |
| chrUn | 84076438 | 84077309 | 872  | SAT1_CF | blue   | na |
| chrUn | 84081304 | 84081466 | 163  | Sat2CF  | purple | na |
| chrUn | 84081332 | 84082386 | 1055 | Sat2CF  | purple | na |
| chrUn | 84082614 | 84083202 | 589  | SAT1_CF | blue   | na |
| chrUn | 84083234 | 84083423 | 190  | SAT1_CF | blue   | na |
| chrUn | 84083418 | 84084140 | 723  | CarSat1 | red    | na |
| chrUn | 84085503 | 84086794 | 1292 | CarSat1 | red    | na |
| chrUn | 84086810 | 84087522 | 713  | CarSat1 | red    | na |
| chrUn | 84087547 | 84088269 | 723  | CarSat1 | red    | na |
| chrUn | 84088285 | 84089739 | 1455 | CarSat1 | red    | na |
| chrUn | 84089755 | 84090915 | 1161 | CarSat1 | red    | na |
| chrUn | 84117879 | 84120097 | 2219 | CarSat1 | red    | na |
| chrUn | 84120280 | 84120692 | 413  | CarSat1 | red    | na |
| chrUn | 84120719 | 84122511 | 1793 | CarSat1 | red    | na |
| chrUn | 84122693 | 84123105 | 413  | CarSat1 | red    | na |
| chrUn | 84124144 | 84124725 | 582  | CarSat1 | red    | na |
| chrUn | 84124749 | 84125956 | 1208 | CarSat1 | red    | na |
| chrUn | 84125983 | 84126693 | 711  | CarSat1 | red    | na |
| chrUn | 84126720 | 84127896 | 1177 | CarSat1 | red    | na |
| chrUn | 84127912 | 84128038 | 127  | Carsat2 | orange | na |
| chrUn | 84127926 | 84129517 | 1592 | CarSat1 | red    | na |



|       |          |          |      |         |        |    |
|-------|----------|----------|------|---------|--------|----|
| chrUn | 84130583 | 84131802 | 1220 | CarSat1 | red    | na |
| chrUn | 84131823 | 84133421 | 1599 | CarSat1 | red    | na |
| chrUn | 84133452 | 84135041 | 1590 | CarSat1 | red    | na |
| chrUn | 84135072 | 84135978 | 907  | CarSat1 | red    | na |
| chrUn | 84136985 | 84138561 | 1577 | CarSat1 | red    | na |
| chrUn | 84138576 | 84138703 | 128  | Carsat2 | orange | na |
| chrUn | 84138591 | 84139297 | 707  | CarSat1 | red    | na |
| chrUn | 84139327 | 84140771 | 1445 | CarSat1 | red    | na |
| chrUn | 84140786 | 84140913 | 128  | Carsat2 | orange | na |
| chrUn | 84140801 | 84141513 | 713  | CarSat1 | red    | na |
| chrUn | 84141528 | 84141654 | 127  | Carsat2 | orange | na |
| chrUn | 84141543 | 84142379 | 837  | CarSat1 | red    | na |
| chrUn | 84143427 | 84144258 | 832  | CarSat1 | red    | na |
| chrUn | 84144285 | 84146469 | 2185 | CarSat1 | red    | na |
| chrUn | 84146496 | 84148125 | 1630 | CarSat1 | red    | na |
| chrUn | 84148286 | 84148828 | 543  | CarSat1 | red    | na |
| chrUn | 84156245 | 84157174 | 930  | CarSat1 | red    | na |
| chrUn | 84157199 | 84158029 | 831  | CarSat1 | red    | na |
| chrUn | 84158361 | 84161659 | 3299 | CarSat1 | red    | na |
| chrUn | 84162672 | 84165352 | 2681 | CarSat1 | red    | na |
| chrUn | 84165379 | 84166095 | 717  | CarSat1 | red    | na |
| chrUn | 84166121 | 84168061 | 1941 | CarSat1 | red    | na |
| chrUn | 84169070 | 84169767 | 698  | CarSat1 | red    | na |
| chrUn | 84169788 | 84170502 | 715  | CarSat1 | red    | na |
| chrUn | 84170529 | 84171239 | 711  | CarSat1 | red    | na |
| chrUn | 84171266 | 84172954 | 1689 | CarSat1 | red    | na |
| chrUn | 84172979 | 84174476 | 1498 | CarSat1 | red    | na |
| chrUn | 84175482 | 84176629 | 1148 | CarSat1 | red    | na |
| chrUn | 84176656 | 84177616 | 961  | CarSat1 | red    | na |
| chrUn | 84177632 | 84178101 | 470  | CarSat1 | red    | na |
| chrUn | 84178128 | 84178837 | 710  | CarSat1 | red    | na |
| chrUn | 84178864 | 84179573 | 710  | CarSat1 | red    | na |
| chrUn | 84179600 | 84180868 | 1269 | CarSat1 | red    | na |
| chrUn | 84188298 | 84191590 | 3293 | CarSat1 | red    | na |
| chrUn | 84191606 | 84192318 | 713  | CarSat1 | red    | na |
| chrUn | 84192343 | 84193678 | 1336 | CarSat1 | red    | na |
| chrUn | 84201096 | 84201656 | 561  | CarSat1 | red    | na |
| chrUn | 84201680 | 84202635 | 956  | CarSat1 | red    | na |
| chrUn | 84202662 | 84203858 | 1197 | CarSat1 | red    | na |
| chrUn | 84203892 | 84206492 | 2601 | CarSat1 | red    | na |
| chrUn | 84207497 | 84208346 | 850  | CarSat1 | red    | na |
| chrUn | 84208373 | 84209335 | 963  | CarSat1 | red    | na |

|       |          |          |      |         |        |    |
|-------|----------|----------|------|---------|--------|----|
| chrUn | 84209351 | 84212891 | 3541 | CarSat1 | red    | na |
| chrUn | 84213905 | 84214146 | 242  | SAT1_CF | blue   | na |
| chrUn | 84214239 | 84215321 | 1083 | SAT1_CF | blue   | na |
| chrUn | 84215506 | 84215679 | 174  | SAT1_CF | blue   | na |
| chrUn | 84215707 | 84216338 | 632  | SAT1_CF | blue   | na |
| chrUn | 84216381 | 84216928 | 548  | SAT1_CF | blue   | na |
| chrUn | 84216949 | 84217058 | 110  | SAT1_CF | blue   | na |
| chrUn | 84217070 | 84218188 | 1119 | SAT1_CF | blue   | na |
| chrUn | 84218200 | 84219287 | 1088 | SAT1_CF | blue   | na |
| chrUn | 84221223 | 84223095 | 1873 | SAT1_CF | blue   | na |
| chrUn | 84223137 | 84224095 | 959  | SAT1_CF | blue   | na |
| chrUn | 84224117 | 84225274 | 1158 | SAT1_CF | blue   | na |
| chrUn | 84225260 | 84225676 | 417  | CarSat1 | red    | na |
| chrUn | 84226722 | 84228007 | 1286 | CarSat1 | red    | na |
| chrUn | 84228034 | 84228744 | 711  | CarSat1 | red    | na |
| chrUn | 84228771 | 84229732 | 962  | CarSat1 | red    | na |
| chrUn | 84229748 | 84232073 | 2326 | CarSat1 | red    | na |
| chrUn | 84239877 | 84245261 | 5385 | CarSat1 | red    | na |
| chrUn | 84246273 | 84246937 | 665  | CarSat1 | red    | na |
| chrUn | 84246953 | 84248157 | 1205 | CarSat1 | red    | na |
| chrUn | 84248184 | 84249875 | 1692 | CarSat1 | red    | na |
| chrUn | 84249900 | 84250611 | 712  | CarSat1 | red    | na |
| chrUn | 84250636 | 84251106 | 471  | CarSat1 | red    | na |
| chrUn | 84251127 | 84251651 | 525  | CarSat1 | red    | na |
| chrUn | 84252669 | 84253566 | 898  | CarSat1 | red    | na |
| chrUn | 84253591 | 84254303 | 713  | CarSat1 | red    | na |
| chrUn | 84254328 | 84258036 | 3709 | CarSat1 | red    | na |
| chrUn | 84259055 | 84262206 | 3152 | CarSat1 | red    | na |
| chrUn | 84262228 | 84263180 | 953  | CarSat1 | red    | na |
| chrUn | 84263207 | 84264415 | 1209 | CarSat1 | red    | na |
| chrUn | 84265421 | 84266824 | 1404 | CarSat1 | red    | na |
| chrUn | 84266849 | 84269773 | 2925 | CarSat1 | red    | na |
| chrUn | 84269798 | 84270727 | 930  | CarSat1 | red    | na |
| chrUn | 84271853 | 84272293 | 441  | CarSat1 | red    | na |
| chrUn | 84272325 | 84273910 | 1586 | CarSat1 | red    | na |
| chrUn | 84273931 | 84275528 | 1598 | CarSat1 | red    | na |
| chrUn | 84275559 | 84277147 | 1589 | CarSat1 | red    | na |
| chrUn | 84297256 | 84299100 | 1845 | CarSat1 | red    | na |
| chrUn | 84299115 | 84299241 | 127  | Carsat2 | orange | na |
| chrUn | 84299130 | 84299835 | 706  | CarSat1 | red    | na |
| chrUn | 84299850 | 84299965 | 116  | Carsat2 | orange | na |
| chrUn | 84299865 | 84300571 | 707  | CarSat1 | red    | na |

|       |          |          |      |         |        |    |
|-------|----------|----------|------|---------|--------|----|
| chrUn | 84300586 | 84300712 | 127  | Carsat2 | orange | na |
| chrUn | 84300601 | 84301307 | 707  | CarSat1 | red    | na |
| chrUn | 84301322 | 84301448 | 127  | Carsat2 | orange | na |
| chrUn | 84301337 | 84302044 | 708  | CarSat1 | red    | na |
| chrUn | 84302059 | 84302186 | 128  | Carsat2 | orange | na |
| chrUn | 84302074 | 84302611 | 538  | CarSat1 | red    | na |
| chrUn | 84303641 | 84304609 | 969  | CarSat1 | red    | na |
| chrUn | 84304634 | 84305344 | 711  | CarSat1 | red    | na |
| chrUn | 84305369 | 84306072 | 704  | CarSat1 | red    | na |
| chrUn | 84306097 | 84307025 | 929  | CarSat1 | red    | na |
| chrUn | 84307062 | 84307545 | 484  | CarSat1 | red    | na |
| chrUn | 84307570 | 84308943 | 1374 | CarSat1 | red    | na |
| chrUn | 84316324 | 84320485 | 4162 | CarSat1 | red    | na |
| chrUn | 84320510 | 84321646 | 1137 | CarSat1 | red    | na |
| chrUn | 84334049 | 84334311 | 263  | SAT1_CF | blue   | na |
| chrUn | 84341697 | 84345297 | 3601 | CarSat1 | red    | na |
| chrUn | 84345324 | 84345793 | 470  | CarSat1 | red    | na |
| chrUn | 84345818 | 84346968 | 1151 | CarSat1 | red    | na |
| chrUn | 84347979 | 84348601 | 623  | CarSat1 | red    | na |
| chrUn | 84348638 | 84349353 | 716  | CarSat1 | red    | na |
| chrUn | 84349378 | 84350091 | 714  | CarSat1 | red    | na |
| chrUn | 84350116 | 84350546 | 431  | CarSat1 | red    | na |
| chrUn | 84350573 | 84351284 | 712  | CarSat1 | red    | na |
| chrUn | 84351311 | 84352756 | 1446 | CarSat1 | red    | na |
| chrUn | 84352783 | 84353298 | 516  | CarSat1 | red    | na |
| chrUn | 84354304 | 84355249 | 946  | CarSat1 | red    | na |
| chrUn | 84355264 | 84355990 | 727  | CarSat1 | red    | na |
| chrUn | 84356005 | 84356726 | 722  | CarSat1 | red    | na |
| chrUn | 84356741 | 84359626 | 2886 | CarSat1 | red    | na |
| chrUn | 84366949 | 84367782 | 834  | CarSat1 | red    | na |
| chrUn | 84367809 | 84368771 | 963  | CarSat1 | red    | na |
| chrUn | 84368787 | 84369722 | 936  | CarSat1 | red    | na |
| chrUn | 84369739 | 84369864 | 126  | Carsat2 | orange | na |
| chrUn | 84369752 | 84372268 | 2517 | CarSat1 | red    | na |
| chrUn | 84381116 | 84381916 | 801  | CarSat1 | red    | na |
| chrUn | 84381932 | 84382896 | 965  | CarSat1 | red    | na |
| chrUn | 84382923 | 84383633 | 711  | CarSat1 | red    | na |
| chrUn | 84383660 | 84385376 | 1717 | CarSat1 | red    | na |
| chrUn | 84385406 | 84386424 | 1019 | CarSat1 | red    | na |
| chrUn | 84387434 | 84388309 | 876  | CarSat1 | red    | na |
| chrUn | 84388336 | 84389298 | 963  | CarSat1 | red    | na |
| chrUn | 84389314 | 84390772 | 1459 | CarSat1 | red    | na |

|       |          |          |      |         |        |    |
|-------|----------|----------|------|---------|--------|----|
| chrUn | 84390788 | 84391508 | 721  | CarSat1 | red    | na |
| chrUn | 84391524 | 84391993 | 470  | CarSat1 | red    | na |
| chrUn | 84392020 | 84392689 | 670  | CarSat1 | red    | na |
| chrUn | 84393795 | 84394725 | 931  | CarSat1 | red    | na |
| chrUn | 84394740 | 84394867 | 128  | Carsat2 | orange | na |
| chrUn | 84394755 | 84395977 | 1223 | CarSat1 | red    | na |
| chrUn | 84396001 | 84397948 | 1948 | CarSat1 | red    | na |
| chrUn | 84397975 | 84399041 | 1067 | CarSat1 | red    | na |
| chrUn | 84400045 | 84401236 | 1192 | CarSat1 | red    | na |
| chrUn | 84401252 | 84402215 | 964  | CarSat1 | red    | na |
| chrUn | 84402242 | 84404428 | 2187 | CarSat1 | red    | na |
| chrUn | 84404455 | 84405344 | 890  | CarSat1 | red    | na |
| chrUn | 84406346 | 84407353 | 1008 | CarSat1 | red    | na |
| chrUn | 84407380 | 84408089 | 710  | CarSat1 | red    | na |
| chrUn | 84408116 | 84408827 | 712  | CarSat1 | red    | na |
| chrUn | 84408854 | 84411633 | 2780 | CarSat1 | red    | na |
| chrUn | 84418971 | 84424226 | 5256 | CarSat1 | red    | na |
| chrUn | 84425232 | 84426627 | 1396 | CarSat1 | red    | na |
| chrUn | 84426652 | 84430517 | 3866 | CarSat1 | red    | na |
| chrUn | 84431524 | 84433656 | 2133 | CarSat1 | red    | na |
| chrUn | 84433681 | 84434150 | 470  | CarSat1 | red    | na |
| chrUn | 84434177 | 84436090 | 1914 | CarSat1 | red    | na |
| chrUn | 84436120 | 84436807 | 688  | CarSat1 | red    | na |
| chrUn | 84444109 | 84446054 | 1946 | CarSat1 | red    | na |
| chrUn | 84446081 | 84447779 | 1699 | CarSat1 | red    | na |
| chrUn | 84447804 | 84448264 | 461  | CarSat1 | red    | na |
| chrUn | 84448291 | 84449387 | 1097 | CarSat1 | red    | na |
| chrUn | 84456693 | 84456787 | 95   | CarSat1 | red    | na |
| chrUn | 84456832 | 84457323 | 492  | CarSat1 | red    | na |
| chrUn | 84457350 | 84458060 | 711  | CarSat1 | red    | na |
| chrUn | 84458087 | 84459534 | 1448 | CarSat1 | red    | na |
| chrUn | 84459561 | 84461009 | 1449 | CarSat1 | red    | na |
| chrUn | 84461036 | 84461978 | 943  | CarSat1 | red    | na |
| chrUn | 84462984 | 84464026 | 1043 | CarSat1 | red    | na |
| chrUn | 84464053 | 84464762 | 710  | CarSat1 | red    | na |
| chrUn | 84464789 | 84465499 | 711  | CarSat1 | red    | na |
| chrUn | 84465526 | 84466235 | 710  | CarSat1 | red    | na |
| chrUn | 84466262 | 84468254 | 1993 | CarSat1 | red    | na |
| chrUn | 84475557 | 84476075 | 519  | CarSat1 | red    | na |
| chrUn | 84476102 | 84477819 | 1718 | CarSat1 | red    | na |
| chrUn | 84477849 | 84478289 | 441  | CarSat1 | red    | na |
| chrUn | 84478316 | 84478784 | 469  | CarSat1 | red    | na |

|       |          |          |      |         |        |    |
|-------|----------|----------|------|---------|--------|----|
| chrUn | 84478382 | 84479762 | 1381 | CarSat1 | red    | na |
| chrUn | 84479789 | 84480829 | 1041 | CarSat1 | red    | na |
| chrUn | 84481838 | 84482322 | 485  | CarSat1 | red    | na |
| chrUn | 84482338 | 84483058 | 721  | CarSat1 | red    | na |
| chrUn | 84483074 | 84484008 | 935  | CarSat1 | red    | na |
| chrUn | 84484023 | 84484150 | 128  | Carsat2 | orange | na |
| chrUn | 84484038 | 84485017 | 980  | CarSat1 | red    | na |
| chrUn | 84485044 | 84486005 | 962  | CarSat1 | red    | na |
| chrUn | 84486021 | 84487102 | 1082 | CarSat1 | red    | na |
| chrUn | 84488119 | 84488941 | 823  | CarSat1 | red    | na |
| chrUn | 84488968 | 84489947 | 980  | CarSat1 | red    | na |
| chrUn | 84489977 | 84491897 | 1921 | CarSat1 | red    | na |
| chrUn | 84491924 | 84492635 | 712  | CarSat1 | red    | na |
| chrUn | 84492662 | 84493378 | 717  | CarSat1 | red    | na |
| chrUn | 84494391 | 84497360 | 2970 | CarSat1 | red    | na |
| chrUn | 84497384 | 84499056 | 1673 | CarSat1 | red    | na |
| chrUn | 84499086 | 84499660 | 575  | CarSat1 | red    | na |
| chrUn | 84500668 | 84501199 | 532  | CarSat1 | red    | na |
| chrUn | 84501226 | 84501695 | 470  | CarSat1 | red    | na |
| chrUn | 84501711 | 84503408 | 1698 | CarSat1 | red    | na |
| chrUn | 84503439 | 84503902 | 464  | CarSat1 | red    | na |
| chrUn | 84503918 | 84504638 | 721  | CarSat1 | red    | na |
| chrUn | 84504663 | 84505884 | 1222 | CarSat1 | red    | na |
| chrUn | 84506936 | 84507609 | 674  | CarSat1 | red    | na |
| chrUn | 84507636 | 84508105 | 470  | CarSat1 | red    | na |
| chrUn | 84508121 | 84508842 | 722  | CarSat1 | red    | na |
| chrUn | 84508858 | 84509579 | 722  | CarSat1 | red    | na |
| chrUn | 84509595 | 84510316 | 722  | CarSat1 | red    | na |
| chrUn | 84510332 | 84512169 | 1838 | CarSat1 | red    | na |
| chrUn | 84513195 | 84513823 | 629  | CarSat1 | red    | na |
| chrUn | 84513852 | 84515296 | 1445 | CarSat1 | red    | na |
| chrUn | 84515323 | 84516303 | 981  | CarSat1 | red    | na |
| chrUn | 84516333 | 84518448 | 2116 | CarSat1 | red    | na |
| chrUn | 84519454 | 84519923 | 470  | CarSat1 | red    | na |
| chrUn | 84519948 | 84521394 | 1447 | CarSat1 | red    | na |
| chrUn | 84521419 | 84522627 | 1209 | CarSat1 | red    | na |
| chrUn | 84522643 | 84524709 | 2067 | CarSat1 | red    | na |
| chrUn | 84525733 | 84527870 | 2138 | CarSat1 | red    | na |
| chrUn | 84527897 | 84528604 | 708  | CarSat1 | red    | na |
| chrUn | 84528631 | 84530079 | 1449 | CarSat1 | red    | na |
| chrUn | 84530106 | 84530951 | 846  | CarSat1 | red    | na |
| chrUn | 84538233 | 84539836 | 1604 | CarSat1 | red    | na |

|       |          |          |      |         |        |    |
|-------|----------|----------|------|---------|--------|----|
| chrUn | 84539866 | 84541302 | 1437 | CarSat1 | red    | na |
| chrUn | 84541324 | 84541451 | 128  | Carsat2 | orange | na |
| chrUn | 84541339 | 84543480 | 2142 | CarSat1 | red    | na |
| chrUn | 84544564 | 84546264 | 1701 | CarSat1 | red    | na |
| chrUn | 84546280 | 84548477 | 2198 | CarSat1 | red    | na |
| chrUn | 84548493 | 84548962 | 470  | CarSat1 | red    | na |
| chrUn | 84548989 | 84549700 | 712  | CarSat1 | red    | na |
| chrUn | 84557004 | 84557843 | 840  | CarSat1 | red    | na |
| chrUn | 84557864 | 84561531 | 3668 | CarSat1 | red    | na |
| chrUn | 84561552 | 84562221 | 670  | CarSat1 | red    | na |
| chrUn | 84575711 | 84580932 | 5222 | Carsat2 | orange | na |
| chrUn | 84588231 | 84589119 | 889  | CarSat1 | red    | na |
| chrUn | 84589144 | 84591872 | 2729 | CarSat1 | red    | na |
| chrUn | 84591902 | 84593345 | 1444 | CarSat1 | red    | na |
| chrUn | 84594423 | 84597766 | 3344 | CarSat1 | red    | na |
| chrUn | 84597791 | 84599628 | 1838 | CarSat1 | red    | na |
| chrUn | 84600634 | 84601177 | 544  | SAT1_CF | blue   | na |
| chrUn | 84603686 | 84603949 | 264  | SAT1_CF | blue   | na |
| chrUn | 84603961 | 84604635 | 675  | SAT1_CF | blue   | na |
| chrUn | 84604674 | 84605823 | 1150 | SAT1_CF | blue   | na |
| chrUn | 84605849 | 84606487 | 639  | SAT1_CF | blue   | na |
| chrUn | 84606519 | 84606892 | 374  | SAT1_CF | blue   | na |
| chrUn | 84606938 | 84607439 | 502  | SAT1_CF | blue   | na |
| chrUn | 84607451 | 84608300 | 850  | SAT1_CF | blue   | na |
| chrUn | 84615568 | 84616204 | 637  | CarSat1 | red    | na |
| chrUn | 84616231 | 84616942 | 712  | CarSat1 | red    | na |
| chrUn | 84616969 | 84618166 | 1198 | CarSat1 | red    | na |
| chrUn | 84618191 | 84619153 | 963  | CarSat1 | red    | na |
| chrUn | 84619180 | 84620762 | 1583 | CarSat1 | red    | na |
| chrUn | 84627962 | 84628411 | 450  | CarSat1 | red    | na |
| chrUn | 84628438 | 84630624 | 2187 | CarSat1 | red    | na |
| chrUn | 84630651 | 84632100 | 1450 | CarSat1 | red    | na |
| chrUn | 84632127 | 84633148 | 1022 | CarSat1 | red    | na |
| chrUn | 84634151 | 84634460 | 310  | CarSat1 | red    | na |
| chrUn | 84634481 | 84639332 | 4852 | CarSat1 | red    | na |
| chrUn | 84640372 | 84642359 | 1988 | CarSat1 | red    | na |
| chrUn | 84642386 | 84644088 | 1703 | CarSat1 | red    | na |
| chrUn | 84644113 | 84645518 | 1406 | CarSat1 | red    | na |
| chrUn | 84652727 | 84653276 | 550  | CarSat1 | red    | na |
| chrUn | 84653303 | 84654014 | 712  | CarSat1 | red    | na |
| chrUn | 84654041 | 84655004 | 964  | CarSat1 | red    | na |
| chrUn | 84655029 | 84656467 | 1439 | CarSat1 | red    | na |

|       |          |          |      |         |        |    |
|-------|----------|----------|------|---------|--------|----|
| chrUn | 84656492 | 84657214 | 723  | CarSat1 | red    | na |
| chrUn | 84657239 | 84657831 | 593  | CarSat1 | red    | na |
| chrUn | 84658890 | 84660428 | 1539 | CarSat1 | red    | na |
| chrUn | 84660450 | 84663108 | 2659 | CarSat1 | red    | na |
| chrUn | 84663129 | 84664035 | 907  | CarSat1 | red    | na |
| chrUn | 84677414 | 84678102 | 689  | CarSat1 | red    | na |
| chrUn | 84678127 | 84680798 | 2672 | CarSat1 | red    | na |
| chrUn | 84680819 | 84682578 | 1760 | CarSat1 | red    | na |
| chrUn | 84689755 | 84690826 | 1072 | CarSat1 | red    | na |
| chrUn | 84690860 | 84691495 | 636  | CarSat1 | red    | na |
| chrUn | 84691510 | 84692955 | 1446 | CarSat1 | red    | na |
| chrUn | 84692985 | 84693911 | 927  | CarSat1 | red    | na |
| chrUn | 84693944 | 84694445 | 502  | CarSat1 | red    | na |
| chrUn | 84694460 | 84694900 | 441  | CarSat1 | red    | na |
| chrUn | 84732801 | 84734129 | 1329 | CarSat1 | red    | na |
| chrUn | 84734156 | 84735362 | 1207 | CarSat1 | red    | na |
| chrUn | 84735387 | 84736339 | 953  | CarSat1 | red    | na |
| chrUn | 84736366 | 84737357 | 992  | CarSat1 | red    | na |
| chrUn | 84737372 | 84737924 | 553  | CarSat1 | red    | na |
| chrUn | 84738924 | 84739232 | 309  | SAT1_CF | blue   | na |
| chrUn | 84739247 | 84739772 | 526  | SAT1_CF | blue   | na |
| chrUn | 84739802 | 84739957 | 156  | SAT1_CF | blue   | na |
| chrUn | 84739974 | 84740421 | 448  | SAT1_CF | blue   | na |
| chrUn | 84740445 | 84741203 | 759  | SAT1_CF | blue   | na |
| chrUn | 84741215 | 84741792 | 578  | SAT1_CF | blue   | na |
| chrUn | 84741804 | 84743978 | 2175 | SAT1_CF | blue   | na |
| chrUn | 84745060 | 84746216 | 1157 | CarSat1 | red    | na |
| chrUn | 84746247 | 84748121 | 1875 | CarSat1 | red    | na |
| chrUn | 84748103 | 84748218 | 116  | Carsat2 | orange | na |
| chrUn | 84748233 | 84748939 | 707  | CarSat1 | red    | na |
| chrUn | 84748969 | 84749409 | 441  | CarSat1 | red    | na |
| chrUn | 84749436 | 84750185 | 750  | CarSat1 | red    | na |
| chrUn | 84751187 | 84752098 | 912  | CarSat1 | red    | na |
| chrUn | 84752119 | 84756281 | 4163 | CarSat1 | red    | na |
| chrUn | 84769582 | 84770285 | 704  | CarSat1 | red    | na |
| chrUn | 84770310 | 84771244 | 935  | CarSat1 | red    | na |
| chrUn | 84771259 | 84771386 | 128  | Carsat2 | orange | na |
| chrUn | 84771274 | 84773233 | 1960 | CarSat1 | red    | na |
| chrUn | 84773258 | 84774675 | 1418 | CarSat1 | red    | na |
| chrUn | 84775685 | 84776475 | 791  | CarSat1 | red    | na |
| chrUn | 84776500 | 84777212 | 713  | CarSat1 | red    | na |
| chrUn | 84777238 | 84779934 | 2697 | CarSat1 | red    | na |

|       |          |          |      |         |        |    |
|-------|----------|----------|------|---------|--------|----|
| chrUn | 84779964 | 84780795 | 832  | CarSat1 | red    | na |
| chrUn | 84787918 | 84788747 | 830  | CarSat1 | red    | na |
| chrUn | 84788777 | 84791691 | 2915 | CarSat1 | red    | na |
| chrUn | 84791721 | 84792442 | 722  | CarSat1 | red    | na |
| chrUn | 84792457 | 84793024 | 568  | CarSat1 | red    | na |
| chrUn | 84806259 | 84806961 | 703  | CarSat1 | red    | na |
| chrUn | 84806976 | 84807102 | 127  | Carsat2 | orange | na |
| chrUn | 84806991 | 84808438 | 1448 | CarSat1 | red    | na |
| chrUn | 84808468 | 84809179 | 712  | CarSat1 | red    | na |
| chrUn | 84809194 | 84809321 | 128  | Carsat2 | orange | na |
| chrUn | 84809209 | 84809916 | 708  | CarSat1 | red    | na |
| chrUn | 84809946 | 84810656 | 711  | CarSat1 | red    | na |
| chrUn | 84810671 | 84810798 | 128  | Carsat2 | orange | na |
| chrUn | 84810686 | 84811366 | 681  | CarSat1 | red    | na |
| chrUn | 84812369 | 84813475 | 1107 | CarSat1 | red    | na |
| chrUn | 84813490 | 84815684 | 2195 | CarSat1 | red    | na |
| chrUn | 84815699 | 84816421 | 723  | CarSat1 | red    | na |
| chrUn | 84816436 | 84816879 | 444  | CarSat1 | red    | na |
| chrUn | 84816900 | 84817442 | 543  | CarSat1 | red    | na |
| chrUn | 84818473 | 84819174 | 702  | CarSat1 | red    | na |
| chrUn | 84819196 | 84822860 | 3665 | CarSat1 | red    | na |
| chrUn | 84822882 | 84823563 | 682  | CarSat1 | red    | na |
| chrUn | 84824564 | 84825443 | 880  | CarSat1 | red    | na |
| chrUn | 84825459 | 84826666 | 1208 | CarSat1 | red    | na |
| chrUn | 84826693 | 84827404 | 712  | CarSat1 | red    | na |
| chrUn | 84827431 | 84828142 | 712  | CarSat1 | red    | na |
| chrUn | 84828169 | 84828879 | 711  | CarSat1 | red    | na |
| chrUn | 84828906 | 84829615 | 710  | CarSat1 | red    | na |
| chrUn | 84830658 | 84831855 | 1198 | CarSat1 | red    | na |
| chrUn | 84831882 | 84833329 | 1448 | CarSat1 | red    | na |
| chrUn | 84833357 | 84834805 | 1449 | CarSat1 | red    | na |
| chrUn | 84834830 | 84835721 | 892  | CarSat1 | red    | na |
| chrUn | 84842812 | 84843894 | 1083 | CarSat1 | red    | na |
| chrUn | 84843921 | 84844883 | 963  | CarSat1 | red    | na |
| chrUn | 84844899 | 84846104 | 1206 | CarSat1 | red    | na |
| chrUn | 84846131 | 84847092 | 962  | CarSat1 | red    | na |
| chrUn | 84847108 | 84847872 | 765  | CarSat1 | red    | na |
| chrUn | 84848879 | 84849493 | 615  | SAT1_CF | blue   | na |
| chrUn | 84849519 | 84850037 | 519  | SAT1_CF | blue   | na |
| chrUn | 84850063 | 84850221 | 159  | SAT1_CF | blue   | na |
| chrUn | 84850249 | 84851441 | 1193 | SAT1_CF | blue   | na |
| chrUn | 84851453 | 84852128 | 676  | SAT1_CF | blue   | na |



|       |          |          |              |        |    |
|-------|----------|----------|--------------|--------|----|
| chrUn | 84852155 | 84853027 | 873 SAT1_CF  | blue   | na |
| chrUn | 84853088 | 84853634 | 547 SAT1_CF  | blue   | na |
| chrUn | 84853691 | 84853942 | 252 SAT1_CF  | blue   | na |
| chrUn | 84854948 | 84856561 | 1614 CarSat1 | red    | na |
| chrUn | 84856588 | 84858035 | 1448 CarSat1 | red    | na |
| chrUn | 84858062 | 84858772 | 711 CarSat1  | red    | na |
| chrUn | 84858799 | 84859515 | 717 CarSat1  | red    | na |
| chrUn | 84859531 | 84859994 | 464 CarSat1  | red    | na |
| chrUn | 84861023 | 84861615 | 593 CarSat1  | red    | na |
| chrUn | 84861796 | 84862459 | 664 CarSat1  | red    | na |
| chrUn | 84862484 | 84863197 | 714 CarSat1  | red    | na |
| chrUn | 84863222 | 84863684 | 463 CarSat1  | red    | na |
| chrUn | 84863709 | 84865404 | 1696 CarSat1 | red    | na |
| chrUn | 84865429 | 84865497 | 69 CarSat1   | red    | na |
| chrUn | 84865678 | 84866055 | 378 CarSat1  | red    | na |
| chrUn | 84867072 | 84868050 | 979 CarSat1  | red    | na |
| chrUn | 84868077 | 84868789 | 713 CarSat1  | red    | na |
| chrUn | 84868816 | 84870516 | 1701 CarSat1 | red    | na |
| chrUn | 84870532 | 84871000 | 469 CarSat1  | red    | na |
| chrUn | 84871027 | 84871466 | 440 CarSat1  | red    | na |
| chrUn | 84871481 | 84871604 | 124 Carsat2  | orange | na |
| chrUn | 84871496 | 84872116 | 621 CarSat1  | red    | na |
| chrUn | 84879172 | 84882443 | 3272 CarSat1 | red    | na |
| chrUn | 84882473 | 84883180 | 708 CarSat1  | red    | na |
| chrUn | 84883210 | 84884005 | 796 CarSat1  | red    | na |
| chrUn | 84891964 | 84892544 | 581 SAT1_CF  | blue   | na |
| chrUn | 84892604 | 84893780 | 1177 SAT1_CF | blue   | na |
| chrUn | 84893792 | 84894654 | 863 SAT1_CF  | blue   | na |
| chrUn | 84894696 | 84895393 | 698 SAT1_CF  | blue   | na |
| chrUn | 84895407 | 84895957 | 551 SAT1_CF  | blue   | na |
| chrUn | 84897341 | 84897890 | 550 CarSat1  | red    | na |
| chrUn | 84897917 | 84898880 | 964 CarSat1  | red    | na |
| chrUn | 84898905 | 84901090 | 2186 CarSat1 | red    | na |
| chrUn | 84901106 | 84902363 | 1258 CarSat1 | red    | na |
| chrUn | 84903373 | 84904695 | 1323 CarSat1 | red    | na |
| chrUn | 84904722 | 84905190 | 469 CarSat1  | red    | na |
| chrUn | 84905206 | 84908374 | 3169 CarSat1 | red    | na |
| chrUn | 84909413 | 84910135 | 723 CarSat1  | red    | na |
| chrUn | 84910150 | 84911593 | 1444 CarSat1 | red    | na |
| chrUn | 84911623 | 84913069 | 1447 CarSat1 | red    | na |
| chrUn | 84913101 | 84914412 | 1312 CarSat1 | red    | na |
| chrUn | 84915432 | 84916511 | 1080 CarSat1 | red    | na |

|       |          |          |      |         |        |    |
|-------|----------|----------|------|---------|--------|----|
| chrUn | 84916537 | 84919209 | 2673 | CarSat1 | red    | na |
| chrUn | 84919225 | 84920453 | 1229 | CarSat1 | red    | na |
| chrUn | 84921476 | 84922826 | 1351 | CarSat1 | red    | na |
| chrUn | 84922851 | 84923294 | 444  | CarSat1 | red    | na |
| chrUn | 84923310 | 84925270 | 1961 | CarSat1 | red    | na |
| chrUn | 84925300 | 84925740 | 441  | CarSat1 | red    | na |
| chrUn | 84925767 | 84926465 | 699  | CarSat1 | red    | na |
| chrUn | 84927491 | 84929541 | 2051 | CarSat1 | red    | na |
| chrUn | 84929571 | 84930550 | 980  | CarSat1 | red    | na |
| chrUn | 84930577 | 84932487 | 1911 | CarSat1 | red    | na |
| chrUn | 84933501 | 84935700 | 2200 | CarSat1 | red    | na |
| chrUn | 84935736 | 84935883 | 148  | CarSat1 | red    | na |
| chrUn | 84936070 | 84937103 | 1034 | CarSat1 | red    | na |
| chrUn | 84937130 | 84938508 | 1379 | CarSat1 | red    | na |
| chrUn | 84939508 | 84941519 | 2012 | CarSat1 | red    | na |
| chrUn | 84941534 | 84941660 | 127  | Carsat2 | orange | na |
| chrUn | 84941549 | 84944523 | 2975 | CarSat1 | red    | na |
| chrUn | 84957597 | 84958740 | 1144 | CarSat1 | red    | na |
| chrUn | 84958756 | 84959718 | 963  | CarSat1 | red    | na |
| chrUn | 84959745 | 84960455 | 711  | CarSat1 | red    | na |
| chrUn | 84960482 | 84961193 | 712  | CarSat1 | red    | na |
| chrUn | 84961220 | 84962552 | 1333 | CarSat1 | red    | na |
| chrUn | 84969560 | 84970171 | 612  | CarSat1 | red    | na |
| chrUn | 84970192 | 84970318 | 127  | Carsat2 | orange | na |
| chrUn | 84970207 | 84970904 | 698  | CarSat1 | red    | na |
| chrUn | 84970943 | 84971436 | 494  | CarSat1 | red    | na |
| chrUn | 84971461 | 84971921 | 461  | CarSat1 | red    | na |
| chrUn | 84971948 | 84974558 | 2611 | CarSat1 | red    | na |
| chrUn | 84975585 | 84976521 | 937  | CarSat1 | red    | na |
| chrUn | 84976546 | 84977030 | 485  | CarSat1 | red    | na |
| chrUn | 84977067 | 84978237 | 1171 | CarSat1 | red    | na |
| chrUn | 84978264 | 84978733 | 470  | CarSat1 | red    | na |
| chrUn | 84978758 | 84980558 | 1801 | CarSat1 | red    | na |
| chrUn | 84993569 | 84994359 | 791  | CarSat1 | red    | na |
| chrUn | 84994406 | 84995358 | 953  | CarSat1 | red    | na |
| chrUn | 84995388 | 84996326 | 939  | CarSat1 | red    | na |
| chrUn | 84996351 | 84997309 | 959  | CarSat1 | red    | na |
| chrUn | 84997330 | 84997799 | 470  | CarSat1 | red    | na |
| chrUn | 84997824 | 84998526 | 703  | CarSat1 | red    | na |
| chrUn | 84999542 | 85000531 | 990  | CarSat1 | red    | na |
| chrUn | 85000561 | 85001540 | 980  | CarSat1 | red    | na |
| chrUn | 85001567 | 85004530 | 2964 | CarSat1 | red    | na |

|       |          |          |      |         |        |    |
|-------|----------|----------|------|---------|--------|----|
| chrUn | 85017520 | 85019100 | 1581 | CarSat1 | red    | na |
| chrUn | 85019127 | 85019567 | 441  | CarSat1 | red    | na |
| chrUn | 85019595 | 85021311 | 1717 | CarSat1 | red    | na |
| chrUn | 85021338 | 85022490 | 1153 | CarSat1 | red    | na |
| chrUn | 85023492 | 85024576 | 1085 | CarSat1 | red    | na |
| chrUn | 85024603 | 85025336 | 734  | CarSat1 | red    | na |
| chrUn | 85025361 | 85026070 | 710  | CarSat1 | red    | na |
| chrUn | 85026097 | 85026808 | 712  | CarSat1 | red    | na |
| chrUn | 85026835 | 85027545 | 711  | CarSat1 | red    | na |
| chrUn | 85027572 | 85028463 | 892  | CarSat1 | red    | na |
| chrUn | 85029474 | 85030898 | 1425 | CarSat1 | red    | na |
| chrUn | 85030923 | 85031640 | 718  | CarSat1 | red    | na |
| chrUn | 85031656 | 85032378 | 723  | CarSat1 | red    | na |
| chrUn | 85032394 | 85033115 | 722  | CarSat1 | red    | na |
| chrUn | 85033131 | 85033853 | 723  | CarSat1 | red    | na |
| chrUn | 85033869 | 85034446 | 578  | CarSat1 | red    | na |
| chrUn | 85035500 | 85036395 | 896  | CarSat1 | red    | na |
| chrUn | 85036411 | 85037633 | 1223 | CarSat1 | red    | na |
| chrUn | 85037675 | 85038836 | 1162 | CarSat1 | red    | na |
| chrUn | 85038857 | 85040421 | 1565 | CarSat1 | red    | na |
| chrUn | 85041476 | 85042186 | 711  | CarSat1 | red    | na |
| chrUn | 85042213 | 85043911 | 1699 | CarSat1 | red    | na |
| chrUn | 85043927 | 85044396 | 470  | CarSat1 | red    | na |
| chrUn | 85044423 | 85045384 | 962  | CarSat1 | red    | na |
| chrUn | 85045400 | 85046364 | 965  | CarSat1 | red    | na |
| chrUn | 85047419 | 85047913 | 495  | SAT1_CF | blue   | na |
| chrUn | 85047953 | 85048454 | 502  | SAT1_CF | blue   | na |
| chrUn | 85048470 | 85048591 | 122  | SAT1_CF | blue   | na |
| chrUn | 85048606 | 85049227 | 622  | SAT1_CF | blue   | na |
| chrUn | 85049238 | 85049690 | 453  | SAT1_CF | blue   | na |
| chrUn | 85049871 | 85050047 | 177  | SAT1_CF | blue   | na |
| chrUn | 85050092 | 85050594 | 503  | SAT1_CF | blue   | na |
| chrUn | 85050607 | 85052292 | 1686 | SAT1_CF | blue   | na |
| chrUn | 85053365 | 85054244 | 880  | CarSat1 | red    | na |
| chrUn | 85054259 | 85054386 | 128  | Carsat2 | orange | na |
| chrUn | 85054274 | 85054987 | 714  | CarSat1 | red    | na |
| chrUn | 85055002 | 85055129 | 128  | Carsat2 | orange | na |
| chrUn | 85055017 | 85055723 | 707  | CarSat1 | red    | na |
| chrUn | 85055738 | 85055864 | 127  | Carsat2 | orange | na |
| chrUn | 85055753 | 85058326 | 2574 | CarSat1 | red    | na |
| chrUn | 85077235 | 85078026 | 792  | CarSat1 | red    | na |
| chrUn | 85078057 | 85079645 | 1589 | CarSat1 | red    | na |

|       |          |          |      |         |     |    |
|-------|----------|----------|------|---------|-----|----|
| chrUn | 85079676 | 85081263 | 1588 | CarSat1 | red | na |
| chrUn | 85081294 | 85082195 | 902  | CarSat1 | red | na |
| chrUn | 85083210 | 85083851 | 642  | CarSat1 | red | na |
| chrUn | 85083884 | 85084370 | 487  | CarSat1 | red | na |
| chrUn | 85084400 | 85086071 | 1672 | CarSat1 | red | na |
| chrUn | 85086104 | 85087283 | 1180 | CarSat1 | red | na |
| chrUn | 85087472 | 85087533 | 62   | CarSat1 | red | na |
| chrUn | 85087563 | 85088139 | 577  | CarSat1 | red | na |
| chrUn | 85089157 | 85089801 | 645  | CarSat1 | red | na |
| chrUn | 85089823 | 85093009 | 3187 | CarSat1 | red | na |
| chrUn | 85093039 | 85094108 | 1070 | CarSat1 | red | na |
| chrUn | 85107782 | 85108824 | 1043 | CarSat1 | red | na |
| chrUn | 85108854 | 85109294 | 441  | CarSat1 | red | na |
| chrUn | 85109321 | 85109781 | 461  | CarSat1 | red | na |
| chrUn | 85109806 | 85110300 | 495  | CarSat1 | red | na |
| chrUn | 85110330 | 85111776 | 1447 | CarSat1 | red | na |
| chrUn | 85111806 | 85112727 | 922  | CarSat1 | red | na |
| chrUn | 85113731 | 85114532 | 802  | CarSat1 | red | na |
| chrUn | 85114557 | 85115014 | 458  | CarSat1 | red | na |
| chrUn | 85115035 | 85115992 | 958  | CarSat1 | red | na |
| chrUn | 85116017 | 85117467 | 1451 | CarSat1 | red | na |
| chrUn | 85117492 | 85118648 | 1157 | CarSat1 | red | na |
| chrUn | 85119684 | 85120347 | 664  | CarSat1 | red | na |
| chrUn | 85120377 | 85123822 | 3446 | CarSat1 | red | na |
| chrUn | 85123847 | 85124640 | 794  | CarSat1 | red | na |
| chrUn | 85125659 | 85127848 | 2190 | CarSat1 | red | na |
| chrUn | 85127869 | 85128338 | 470  | CarSat1 | red | na |
| chrUn | 85128363 | 85130595 | 2233 | CarSat1 | red | na |
| chrUn | 85143497 | 85144794 | 1298 | CarSat1 | red | na |
| chrUn | 85144828 | 85147748 | 2921 | CarSat1 | red | na |
| chrUn | 85147773 | 85148438 | 666  | CarSat1 | red | na |
| chrUn | 85149445 | 85150475 | 1031 | CarSat1 | red | na |
| chrUn | 85150505 | 85151484 | 980  | CarSat1 | red | na |
| chrUn | 85151511 | 85153424 | 1914 | CarSat1 | red | na |
| chrUn | 85153454 | 85154365 | 912  | CarSat1 | red | na |
| chrUn | 85161328 | 85165578 | 4251 | CarSat1 | red | na |
| chrUn | 85165605 | 85166175 | 571  | CarSat1 | red | na |
| chrUn | 85179070 | 85180786 | 1717 | CarSat1 | red | na |
| chrUn | 85180811 | 85182047 | 1237 | CarSat1 | red | na |
| chrUn | 85182062 | 85183244 | 1183 | CarSat1 | red | na |
| chrUn | 85183291 | 85183972 | 682  | CarSat1 | red | na |
| chrUn | 85184984 | 85185510 | 527  | CarSat1 | red | na |

|       |          |          |      |         |        |    |
|-------|----------|----------|------|---------|--------|----|
| chrUn | 85185531 | 85186525 | 995  | CarSat1 | red    | na |
| chrUn | 85186547 | 85187467 | 921  | CarSat1 | red    | na |
| chrUn | 85187492 | 85188213 | 722  | CarSat1 | red    | na |
| chrUn | 85188238 | 85188935 | 698  | CarSat1 | red    | na |
| chrUn | 85188961 | 85189893 | 933  | CarSat1 | red    | na |
| chrUn | 85190897 | 85192019 | 1123 | CarSat1 | red    | na |
| chrUn | 85192040 | 85193221 | 1182 | CarSat1 | red    | na |
| chrUn | 85193252 | 85194965 | 1714 | CarSat1 | red    | na |
| chrUn | 85194986 | 85195804 | 819  | CarSat1 | red    | na |
| chrUn | 85208618 | 85209845 | 1228 | CarSat1 | red    | na |
| chrUn | 85209861 | 85210583 | 723  | CarSat1 | red    | na |
| chrUn | 85210599 | 85213484 | 2886 | CarSat1 | red    | na |
| chrUn | 85214490 | 85217031 | 2542 | CarSat1 | red    | na |
| chrUn | 85217058 | 85217526 | 469  | CarSat1 | red    | na |
| chrUn | 85217542 | 85218262 | 721  | CarSat1 | red    | na |
| chrUn | 85218278 | 85219376 | 1099 | CarSat1 | red    | na |
| chrUn | 85220384 | 85221476 | 1093 | CarSat1 | red    | na |
| chrUn | 85221503 | 85221963 | 461  | CarSat1 | red    | na |
| chrUn | 85221988 | 85222955 | 968  | CarSat1 | red    | na |
| chrUn | 85222976 | 85223686 | 711  | CarSat1 | red    | na |
| chrUn | 85223713 | 85224424 | 712  | CarSat1 | red    | na |
| chrUn | 85224455 | 85225265 | 811  | CarSat1 | red    | na |
| chrUn | 85226325 | 85228761 | 2437 | CarSat1 | red    | na |
| chrUn | 85228777 | 85229498 | 722  | CarSat1 | red    | na |
| chrUn | 85229514 | 85229983 | 470  | CarSat1 | red    | na |
| chrUn | 85230010 | 85231134 | 1125 | CarSat1 | red    | na |
| chrUn | 85232154 | 85232853 | 700  | CarSat1 | red    | na |
| chrUn | 85232880 | 85233582 | 703  | CarSat1 | red    | na |
| chrUn | 85233614 | 85234325 | 712  | CarSat1 | red    | na |
| chrUn | 85234352 | 85236047 | 1696 | CarSat1 | red    | na |
| chrUn | 85236063 | 85236997 | 935  | CarSat1 | red    | na |
| chrUn | 85238022 | 85238318 | 297  | SAT1_CF | blue   | na |
| chrUn | 85238336 | 85239420 | 1085 | SAT1_CF | blue   | na |
| chrUn | 85239433 | 85239953 | 521  | SAT1_CF | blue   | na |
| chrUn | 85239984 | 85242584 | 2601 | SAT1_CF | blue   | na |
| chrUn | 85242595 | 85242895 | 301  | SAT1_CF | blue   | na |
| chrUn | 85249766 | 85250522 | 757  | CarSat1 | red    | na |
| chrUn | 85250537 | 85250663 | 127  | Carsat2 | orange | na |
| chrUn | 85250552 | 85251258 | 707  | CarSat1 | red    | na |
| chrUn | 85251273 | 85251398 | 126  | Carsat2 | orange | na |
| chrUn | 85251288 | 85251997 | 710  | CarSat1 | red    | na |
| chrUn | 85252027 | 85252737 | 711  | CarSat1 | red    | na |

|       |          |          |      |         |        |    |
|-------|----------|----------|------|---------|--------|----|
| chrUn | 85252752 | 85252874 | 123  | Carsat2 | orange | na |
| chrUn | 85252767 | 85254633 | 1867 | CarSat1 | red    | na |
| chrUn | 85261563 | 85263990 | 2428 | CarSat1 | red    | na |
| chrUn | 85264015 | 85264737 | 723  | CarSat1 | red    | na |
| chrUn | 85264762 | 85265465 | 704  | CarSat1 | red    | na |
| chrUn | 85265490 | 85266341 | 852  | CarSat1 | red    | na |
| chrUn | 85279108 | 85280061 | 954  | CarSat1 | red    | na |
| chrUn | 85280092 | 85281678 | 1587 | CarSat1 | red    | na |
| chrUn | 85281709 | 85283298 | 1590 | CarSat1 | red    | na |
| chrUn | 85283329 | 85283904 | 576  | CarSat1 | red    | na |
| chrUn | 85290821 | 85291817 | 997  | SAT1_CF | blue   | na |
| chrUn | 85291831 | 85292347 | 517  | SAT1_CF | blue   | na |
| chrUn | 85292391 | 85293423 | 1033 | SAT1_CF | blue   | na |
| chrUn | 85293443 | 85294062 | 620  | SAT1_CF | blue   | na |
| chrUn | 85294087 | 85294722 | 636  | SAT1_CF | blue   | na |
| chrUn | 85294745 | 85295252 | 508  | SAT1_CF | blue   | na |
| chrUn | 85295265 | 85295666 | 402  | SAT1_CF | blue   | na |
| chrUn | 85296713 | 85301525 | 4813 | CarSat1 | red    | na |
| chrUn | 85302530 | 85302958 | 429  | CarSat1 | red    | na |
| chrUn | 85302985 | 85304192 | 1208 | CarSat1 | red    | na |
| chrUn | 85304208 | 85305169 | 962  | CarSat1 | red    | na |
| chrUn | 85305196 | 85305907 | 712  | CarSat1 | red    | na |
| chrUn | 85305934 | 85307372 | 1439 | CarSat1 | red    | na |
| chrUn | 85308438 | 85309154 | 717  | CarSat1 | red    | na |
| chrUn | 85309181 | 85309891 | 711  | CarSat1 | red    | na |
| chrUn | 85309918 | 85310880 | 963  | CarSat1 | red    | na |
| chrUn | 85310896 | 85311616 | 721  | CarSat1 | red    | na |
| chrUn | 85311632 | 85312100 | 469  | CarSat1 | red    | na |
| chrUn | 85312127 | 85313215 | 1089 | CarSat1 | red    | na |
| chrUn | 85314232 | 85315299 | 1068 | CarSat1 | red    | na |
| chrUn | 85315329 | 85315821 | 493  | CarSat1 | red    | na |
| chrUn | 85315837 | 85317043 | 1207 | CarSat1 | red    | na |
| chrUn | 85317064 | 85317777 | 714  | CarSat1 | red    | na |
| chrUn | 85317805 | 85319053 | 1249 | CarSat1 | red    | na |
| chrUn | 85320053 | 85323344 | 3292 | CarSat1 | red    | na |
| chrUn | 85323371 | 85324081 | 711  | CarSat1 | red    | na |
| chrUn | 85324125 | 85324884 | 760  | CarSat1 | red    | na |
| chrUn | 85325891 | 85327680 | 1790 | CarSat1 | red    | na |
| chrUn | 85327695 | 85328619 | 925  | CarSat1 | red    | na |
| chrUn | 85328644 | 85330091 | 1448 | CarSat1 | red    | na |
| chrUn | 85330116 | 85330715 | 600  | CarSat1 | red    | na |
| chrUn | 85337534 | 85339056 | 1523 | CarSat1 | red    | na |

|       |          |          |      |         |        |    |
|-------|----------|----------|------|---------|--------|----|
| chrUn | 85339083 | 85342321 | 3239 | CarSat1 | red    | na |
| chrUn | 85349141 | 85353923 | 4783 | CarSat1 | red    | na |
| chrUn | 85354939 | 85356507 | 1569 | CarSat1 | red    | na |
| chrUn | 85356534 | 85357244 | 711  | CarSat1 | red    | na |
| chrUn | 85357271 | 85358961 | 1691 | CarSat1 | red    | na |
| chrUn | 85358995 | 85359698 | 704  | CarSat1 | red    | na |
| chrUn | 85360732 | 85361167 | 436  | CarSat1 | red    | na |
| chrUn | 85361188 | 85362370 | 1183 | CarSat1 | red    | na |
| chrUn | 85362400 | 85363379 | 980  | CarSat1 | red    | na |
| chrUn | 85363406 | 85364851 | 1446 | CarSat1 | red    | na |
| chrUn | 85364878 | 85365523 | 646  | CarSat1 | red    | na |
| chrUn | 85372312 | 85373187 | 876  | CarSat1 | red    | na |
| chrUn | 85373202 | 85373328 | 127  | Carsat2 | orange | na |
| chrUn | 85373217 | 85373924 | 708  | CarSat1 | red    | na |
| chrUn | 85373939 | 85374066 | 128  | Carsat2 | orange | na |
| chrUn | 85373954 | 85374660 | 707  | CarSat1 | red    | na |
| chrUn | 85374675 | 85374801 | 127  | Carsat2 | orange | na |
| chrUn | 85374690 | 85376403 | 1714 | CarSat1 | red    | na |
| chrUn | 85376433 | 85377068 | 636  | CarSat1 | red    | na |
| chrUn | 85389669 | 85390723 | 1055 | CarSat1 | red    | na |
| chrUn | 85390738 | 85391465 | 728  | CarSat1 | red    | na |
| chrUn | 85391480 | 85392193 | 714  | CarSat1 | red    | na |
| chrUn | 85392223 | 85392945 | 723  | CarSat1 | red    | na |
| chrUn | 85392960 | 85393682 | 723  | CarSat1 | red    | na |
| chrUn | 85393697 | 85394416 | 720  | CarSat1 | red    | na |
| chrUn | 85395455 | 85399475 | 4021 | CarSat1 | red    | na |
| chrUn | 85399499 | 85400149 | 651  | CarSat1 | red    | na |
| chrUn | 85401237 | 85402052 | 816  | CarSat1 | red    | na |
| chrUn | 85402077 | 85403767 | 1691 | CarSat1 | red    | na |
| chrUn | 85403794 | 85405000 | 1207 | CarSat1 | red    | na |
| chrUn | 85405016 | 85405971 | 956  | CarSat1 | red    | na |
| chrUn | 85407049 | 85408176 | 1128 | CarSat1 | red    | na |
| chrUn | 85408206 | 85408914 | 709  | CarSat1 | red    | na |
| chrUn | 85408944 | 85409652 | 709  | CarSat1 | red    | na |
| chrUn | 85409682 | 85410408 | 727  | CarSat1 | red    | na |
| chrUn | 85410423 | 85411131 | 709  | CarSat1 | red    | na |
| chrUn | 85411161 | 85411740 | 580  | CarSat1 | red    | na |
| chrUn | 85412788 | 85413318 | 531  | CarSat1 | red    | na |
| chrUn | 85413345 | 85416010 | 2666 | CarSat1 | red    | na |
| chrUn | 85416040 | 85417004 | 965  | CarSat1 | red    | na |
| chrUn | 85417031 | 85417534 | 504  | CarSat1 | red    | na |
| chrUn | 85418568 | 85419765 | 1198 | CarSat1 | red    | na |

|       |          |          |      |         |     |    |
|-------|----------|----------|------|---------|-----|----|
| chrUn | 85419790 | 85420514 | 725  | CarSat1 | red | na |
| chrUn | 85420530 | 85421491 | 962  | CarSat1 | red | na |
| chrUn | 85421518 | 85422724 | 1207 | CarSat1 | red | na |
| chrUn | 85422740 | 85423278 | 539  | CarSat1 | red | na |
| chrUn | 85424306 | 85426138 | 1833 | CarSat1 | red | na |
| chrUn | 85426168 | 85426875 | 708  | CarSat1 | red | na |
| chrUn | 85426905 | 85429003 | 2099 | CarSat1 | red | na |
| chrUn | 85430058 | 85430526 | 469  | CarSat1 | red | na |
| chrUn | 85430553 | 85431262 | 710  | CarSat1 | red | na |
| chrUn | 85431289 | 85432249 | 961  | CarSat1 | red | na |
| chrUn | 85432265 | 85432732 | 468  | CarSat1 | red | na |
| chrUn | 85432759 | 85433722 | 964  | CarSat1 | red | na |
| chrUn | 85433738 | 85434763 | 1026 | CarSat1 | red | na |
| chrUn | 85435785 | 85436679 | 895  | CarSat1 | red | na |
| chrUn | 85436706 | 85437417 | 712  | CarSat1 | red | na |
| chrUn | 85437444 | 85438638 | 1195 | CarSat1 | red | na |
| chrUn | 85438663 | 85440499 | 1837 | CarSat1 | red | na |
| chrUn | 85441504 | 85442563 | 1060 | CarSat1 | red | na |
| chrUn | 85442584 | 85443791 | 1208 | CarSat1 | red | na |
| chrUn | 85443816 | 85444767 | 952  | CarSat1 | red | na |
| chrUn | 85444794 | 85445254 | 461  | CarSat1 | red | na |
| chrUn | 85445287 | 85446236 | 950  | CarSat1 | red | na |
| chrUn | 85447278 | 85447988 | 711  | CarSat1 | red | na |
| chrUn | 85448014 | 85451429 | 3416 | CarSat1 | red | na |
| chrUn | 85451454 | 85451938 | 485  | CarSat1 | red | na |
| chrUn | 85452978 | 85454589 | 1612 | CarSat1 | red | na |
| chrUn | 85454616 | 85456803 | 2188 | CarSat1 | red | na |
| chrUn | 85456830 | 85457677 | 848  | CarSat1 | red | na |
| chrUn | 85458709 | 85459580 | 872  | CarSat1 | red | na |
| chrUn | 85459607 | 85460317 | 711  | CarSat1 | red | na |
| chrUn | 85460344 | 85461054 | 711  | CarSat1 | red | na |
| chrUn | 85461081 | 85461791 | 711  | CarSat1 | red | na |
| chrUn | 85461818 | 85462797 | 980  | CarSat1 | red | na |
| chrUn | 85462827 | 85463397 | 571  | CarSat1 | red | na |
| chrUn | 85470175 | 85471854 | 1680 | CarSat1 | red | na |
| chrUn | 85471881 | 85473329 | 1449 | CarSat1 | red | na |
| chrUn | 85473356 | 85474066 | 711  | CarSat1 | red | na |
| chrUn | 85474093 | 85474907 | 815  | CarSat1 | red | na |
| chrUn | 85475908 | 85477289 | 1382 | CarSat1 | red | na |
| chrUn | 85477316 | 85478026 | 711  | CarSat1 | red | na |
| chrUn | 85478053 | 85479996 | 1944 | CarSat1 | red | na |
| chrUn | 85480021 | 85480631 | 611  | CarSat1 | red | na |



|       |          |          |      |         |        |    |
|-------|----------|----------|------|---------|--------|----|
| chrUn | 85481635 | 85482564 | 930  | CarSat1 | red    | na |
| chrUn | 85482594 | 85484555 | 1962 | CarSat1 | red    | na |
| chrUn | 85484579 | 85486343 | 1765 | CarSat1 | red    | na |
| chrUn | 85487358 | 85488455 | 1098 | CarSat1 | red    | na |
| chrUn | 85488471 | 85489929 | 1459 | CarSat1 | red    | na |
| chrUn | 85489945 | 85490665 | 721  | CarSat1 | red    | na |
| chrUn | 85490681 | 85491150 | 470  | CarSat1 | red    | na |
| chrUn | 85491177 | 85492069 | 893  | CarSat1 | red    | na |
| chrUn | 85493079 | 85493990 | 912  | CarSat1 | red    | na |
| chrUn | 85494017 | 85494727 | 711  | CarSat1 | red    | na |
| chrUn | 85494754 | 85496203 | 1450 | CarSat1 | red    | na |
| chrUn | 85496230 | 85497189 | 960  | CarSat1 | red    | na |
| chrUn | 85497205 | 85497790 | 586  | CarSat1 | red    | na |
| chrUn | 85498793 | 85499580 | 788  | CarSat1 | red    | na |
| chrUn | 85499610 | 85501282 | 1673 | CarSat1 | red    | na |
| chrUn | 85501300 | 85503495 | 2196 | CarSat1 | red    | na |
| chrUn | 85504495 | 85506558 | 2064 | CarSat1 | red    | na |
| chrUn | 85506588 | 85507300 | 713  | CarSat1 | red    | na |
| chrUn | 85507330 | 85508265 | 936  | CarSat1 | red    | na |
| chrUn | 85508289 | 85509197 | 909  | CarSat1 | red    | na |
| chrUn | 85532975 | 85534233 | 1259 | CarSat1 | red    | na |
| chrUn | 85534249 | 85534970 | 722  | CarSat1 | red    | na |
| chrUn | 85534986 | 85535705 | 720  | CarSat1 | red    | na |
| chrUn | 85535721 | 85536442 | 722  | CarSat1 | red    | na |
| chrUn | 85536458 | 85537659 | 1202 | CarSat1 | red    | na |
| chrUn | 85538675 | 85539518 | 844  | CarSat1 | red    | na |
| chrUn | 85539545 | 85542724 | 3180 | CarSat1 | red    | na |
| chrUn | 85542751 | 85543348 | 598  | CarSat1 | red    | na |
| chrUn | 85544446 | 85547368 | 2923 | CarSat1 | red    | na |
| chrUn | 85547389 | 85549033 | 1645 | CarSat1 | red    | na |
| chrUn | 85555716 | 85556400 | 685  | CarSat1 | red    | na |
| chrUn | 85556432 | 85558024 | 1593 | CarSat1 | red    | na |
| chrUn | 85558055 | 85559654 | 1600 | CarSat1 | red    | na |
| chrUn | 85559675 | 85560390 | 716  | CarSat1 | red    | na |
| chrUn | 85567084 | 85567671 | 588  | CarSat1 | red    | na |
| chrUn | 85567698 | 85570625 | 2928 | CarSat1 | red    | na |
| chrUn | 85570646 | 85571746 | 1101 | CarSat1 | red    | na |
| chrUn | 85572746 | 85573966 | 1221 | CarSat1 | red    | na |
| chrUn | 85573991 | 85574460 | 470  | CarSat1 | red    | na |
| chrUn | 85574487 | 85575664 | 1178 | CarSat1 | red    | na |
| chrUn | 85575679 | 85575806 | 128  | Carsat2 | orange | na |
| chrUn | 85575695 | 85577368 | 1674 | CarSat1 | red    | na |

|       |          |          |      |         |        |    |
|-------|----------|----------|------|---------|--------|----|
| chrUn | 85584104 | 85585692 | 1589 | CarSat1 | red    | na |
| chrUn | 85585717 | 85588152 | 2436 | CarSat1 | red    | na |
| chrUn | 85588173 | 85588753 | 581  | CarSat1 | red    | na |
| chrUn | 85595418 | 85596041 | 624  | CarSat1 | red    | na |
| chrUn | 85596062 | 85597517 | 1456 | CarSat1 | red    | na |
| chrUn | 85597538 | 85598253 | 716  | CarSat1 | red    | na |
| chrUn | 85598274 | 85599481 | 1208 | CarSat1 | red    | na |
| chrUn | 85599506 | 85600073 | 568  | CarSat1 | red    | na |
| chrUn | 85601085 | 85601723 | 639  | CarSat1 | red    | na |
| chrUn | 85601748 | 85603682 | 1935 | CarSat1 | red    | na |
| chrUn | 85603709 | 85604671 | 963  | CarSat1 | red    | na |
| chrUn | 85604697 | 85605726 | 1030 | CarSat1 | red    | na |
| chrUn | 85609910 | 85610058 | 149  | Sat2CF  | purple | na |
| chrUn | 85609930 | 85611147 | 1218 | Sat2CF  | purple | na |
| chrUn | 85609948 | 85611020 | 1073 | Sat2CF  | purple | na |
| chrUn | 85612380 | 85613245 | 866  | CarSat1 | red    | na |
| chrUn | 85613273 | 85614470 | 1198 | CarSat1 | red    | na |
| chrUn | 85614497 | 85617014 | 2518 | CarSat1 | red    | na |
| chrUn | 85618043 | 85620491 | 2449 | CarSat1 | red    | na |
| chrUn | 85620518 | 85621228 | 711  | CarSat1 | red    | na |
| chrUn | 85621255 | 85621965 | 711  | CarSat1 | red    | na |
| chrUn | 85621992 | 85622644 | 653  | CarSat1 | red    | na |
| chrUn | 85623672 | 85626352 | 2681 | CarSat1 | red    | na |
| chrUn | 85626382 | 85627094 | 713  | CarSat1 | red    | na |
| chrUn | 85627109 | 85627236 | 128  | Carsat2 | orange | na |
| chrUn | 85627124 | 85627831 | 708  | CarSat1 | red    | na |
| chrUn | 85627846 | 85627973 | 128  | Carsat2 | orange | na |
| chrUn | 85627861 | 85628281 | 421  | CarSat1 | red    | na |
| chrUn | 85629282 | 85631173 | 1892 | CarSat1 | red    | na |
| chrUn | 85631200 | 85632405 | 1206 | CarSat1 | red    | na |
| chrUn | 85632421 | 85632915 | 495  | CarSat1 | red    | na |
| chrUn | 85632945 | 85633911 | 967  | CarSat1 | red    | na |
| chrUn | 85640555 | 85641571 | 1017 | CarSat1 | red    | na |
| chrUn | 85641596 | 85643299 | 1704 | CarSat1 | red    | na |
| chrUn | 85643320 | 85645154 | 1835 | CarSat1 | red    | na |
| chrUn | 85646166 | 85647793 | 1628 | CarSat1 | red    | na |
| chrUn | 85647818 | 85649999 | 2182 | CarSat1 | red    | na |
| chrUn | 85650024 | 85650746 | 723  | CarSat1 | red    | na |
| chrUn | 85651789 | 85653708 | 1920 | CarSat1 | red    | na |
| chrUn | 85653723 | 85654443 | 721  | CarSat1 | red    | na |
| chrUn | 85654458 | 85655388 | 931  | CarSat1 | red    | na |
| chrUn | 85655421 | 85655919 | 499  | CarSat1 | red    | na |

|       |          |          |      |         |        |    |
|-------|----------|----------|------|---------|--------|----|
| chrUn | 85655934 | 85656378 | 445  | CarSat1 | red    | na |
| chrUn | 85668585 | 85669437 | 853  | CarSat1 | red    | na |
| chrUn | 85669452 | 85669566 | 115  | Carsat2 | orange | na |
| chrUn | 85669467 | 85670174 | 708  | CarSat1 | red    | na |
| chrUn | 85670189 | 85670315 | 127  | Carsat2 | orange | na |
| chrUn | 85670204 | 85670911 | 708  | CarSat1 | red    | na |
| chrUn | 85670941 | 85671648 | 708  | CarSat1 | red    | na |
| chrUn | 85671663 | 85671789 | 127  | Carsat2 | orange | na |
| chrUn | 85671678 | 85672390 | 713  | CarSat1 | red    | na |
| chrUn | 85672405 | 85672532 | 128  | Carsat2 | orange | na |
| chrUn | 85672420 | 85673180 | 761  | CarSat1 | red    | na |
| chrUn | 85674203 | 85675423 | 1221 | CarSat1 | red    | na |
| chrUn | 85675448 | 85677391 | 1944 | CarSat1 | red    | na |
| chrUn | 85677412 | 85678779 | 1368 | CarSat1 | red    | na |
| chrUn | 85679781 | 85680319 | 539  | CarSat1 | red    | na |
| chrUn | 85680349 | 85682533 | 2185 | CarSat1 | red    | na |
| chrUn | 85682563 | 85683489 | 927  | CarSat1 | red    | na |
| chrUn | 85683514 | 85684365 | 852  | CarSat1 | red    | na |
| chrUn | 85685376 | 85688541 | 3166 | CarSat1 | red    | na |
| chrUn | 85688556 | 85688682 | 127  | Carsat2 | orange | na |
| chrUn | 85688571 | 85689277 | 707  | CarSat1 | red    | na |
| chrUn | 85689292 | 85689419 | 128  | Carsat2 | orange | na |
| chrUn | 85689307 | 85689932 | 626  | CarSat1 | red    | na |
| chrUn | 85696557 | 85697931 | 1375 | CarSat1 | red    | na |
| chrUn | 85697947 | 85698909 | 963  | CarSat1 | red    | na |
| chrUn | 85698936 | 85699647 | 712  | CarSat1 | red    | na |
| chrUn | 85699674 | 85701101 | 1428 | CarSat1 | red    | na |
| chrUn | 85702119 | 85703444 | 1326 | CarSat1 | red    | na |
| chrUn | 85703474 | 85704181 | 708  | CarSat1 | red    | na |
| chrUn | 85704211 | 85706124 | 1914 | CarSat1 | red    | na |
| chrUn | 85706150 | 85706663 | 514  | CarSat1 | red    | na |
| chrUn | 85707720 | 85708918 | 1199 | CarSat1 | red    | na |
| chrUn | 85708948 | 85709434 | 487  | CarSat1 | red    | na |
| chrUn | 85709467 | 85711137 | 1671 | CarSat1 | red    | na |
| chrUn | 85711152 | 85711279 | 128  | Carsat2 | orange | na |
| chrUn | 85711167 | 85712251 | 1085 | CarSat1 | red    | na |
| chrUn | 85713253 | 85713674 | 422  | CarSat1 | red    | na |
| chrUn | 85713695 | 85715397 | 1703 | CarSat1 | red    | na |
| chrUn | 85715413 | 85716870 | 1458 | CarSat1 | red    | na |
| chrUn | 85716886 | 85717820 | 935  | CarSat1 | red    | na |
| chrUn | 85718827 | 85719406 | 580  | CarSat1 | red    | na |
| chrUn | 85719433 | 85720881 | 1449 | CarSat1 | red    | na |

|       |          |          |      |         |     |    |
|-------|----------|----------|------|---------|-----|----|
| chrUn | 85720908 | 85722352 | 1445 | CarSat1 | red | na |
| chrUn | 85722379 | 85723399 | 1021 | CarSat1 | red | na |
| chrUn | 85729971 | 85732584 | 2614 | CarSat1 | red | na |
| chrUn | 85732600 | 85733806 | 1207 | CarSat1 | red | na |
| chrUn | 85733833 | 85734528 | 696  | CarSat1 | red | na |
| chrUn | 85735540 | 85736984 | 1445 | CarSat1 | red | na |
| chrUn | 85737011 | 85737720 | 710  | CarSat1 | red | na |
| chrUn | 85737747 | 85739860 | 2114 | CarSat1 | red | na |
| chrUn | 85741164 | 85741874 | 711  | CarSat1 | red | na |
| chrUn | 85741901 | 85742596 | 696  | CarSat1 | red | na |
| chrUn | 85742638 | 85743349 | 712  | CarSat1 | red | na |
| chrUn | 85743376 | 85745075 | 1700 | CarSat1 | red | na |
| chrUn | 85745091 | 85745634 | 544  | CarSat1 | red | na |
| chrUn | 85746682 | 85747392 | 711  | CarSat1 | red | na |
| chrUn | 85747419 | 85748130 | 712  | CarSat1 | red | na |
| chrUn | 85748157 | 85750071 | 1915 | CarSat1 | red | na |
| chrUn | 85750101 | 85751194 | 1094 | CarSat1 | red | na |
| chrUn | 85757757 | 85760299 | 2543 | CarSat1 | red | na |
| chrUn | 85760333 | 85761554 | 1222 | CarSat1 | red | na |
| chrUn | 85761584 | 85762287 | 704  | CarSat1 | red | na |
| chrUn | 85774367 | 85776258 | 1892 | CarSat1 | red | na |
| chrUn | 85776273 | 85777927 | 1655 | CarSat1 | red | na |
| chrUn | 85777959 | 85778892 | 934  | CarSat1 | red | na |
| chrUn | 85779894 | 85780898 | 1005 | CarSat1 | red | na |
| chrUn | 85780923 | 85781885 | 963  | CarSat1 | red | na |
| chrUn | 85781912 | 85783629 | 1718 | CarSat1 | red | na |
| chrUn | 85783659 | 85784367 | 709  | CarSat1 | red | na |
| chrUn | 85785432 | 85785894 | 463  | CarSat1 | red | na |
| chrUn | 85785915 | 85786628 | 714  | CarSat1 | red | na |
| chrUn | 85786649 | 85787362 | 714  | CarSat1 | red | na |
| chrUn | 85787383 | 85787817 | 435  | CarSat1 | red | na |
| chrUn | 85787854 | 85788832 | 979  | CarSat1 | red | na |
| chrUn | 85788853 | 85789290 | 438  | CarSat1 | red | na |
| chrUn | 85789324 | 85789918 | 595  | CarSat1 | red | na |
| chrUn | 85790920 | 85793061 | 2142 | CarSat1 | red | na |
| chrUn | 85793086 | 85794777 | 1692 | CarSat1 | red | na |
| chrUn | 85794804 | 85795417 | 614  | CarSat1 | red | na |
| chrUn | 85796421 | 85797363 | 943  | CarSat1 | red | na |
| chrUn | 85797390 | 85799308 | 1919 | CarSat1 | red | na |
| chrUn | 85799335 | 85800868 | 1534 | CarSat1 | red | na |
| chrUn | 85801932 | 85802809 | 878  | CarSat1 | red | na |
| chrUn | 85802836 | 85803535 | 700  | CarSat1 | red | na |

|       |          |          |      |         |        |    |
|-------|----------|----------|------|---------|--------|----|
| chrUn | 85803560 | 85804267 | 708  | CarSat1 | red    | na |
| chrUn | 85804294 | 85806369 | 2076 | CarSat1 | red    | na |
| chrUn | 85812869 | 85814781 | 1913 | CarSat1 | red    | na |
| chrUn | 85814808 | 85815517 | 710  | CarSat1 | red    | na |
| chrUn | 85815544 | 85816508 | 965  | CarSat1 | red    | na |
| chrUn | 85816533 | 85817324 | 792  | CarSat1 | red    | na |
| chrUn | 85818398 | 85820416 | 2019 | CarSat1 | red    | na |
| chrUn | 85820443 | 85822789 | 2347 | CarSat1 | red    | na |
| chrUn | 85823794 | 85824831 | 1038 | CarSat1 | red    | na |
| chrUn | 85824858 | 85825574 | 717  | CarSat1 | red    | na |
| chrUn | 85825595 | 85828254 | 2660 | CarSat1 | red    | na |
| chrUn | 85834714 | 85836264 | 1551 | CarSat1 | red    | na |
| chrUn | 85836331 | 85836830 | 500  | CarSat1 | red    | na |
| chrUn | 85837022 | 85837499 | 478  | CarSat1 | red    | na |
| chrUn | 85837529 | 85838239 | 711  | CarSat1 | red    | na |
| chrUn | 85838254 | 85838381 | 128  | Carsat2 | orange | na |
| chrUn | 85838269 | 85839161 | 893  | CarSat1 | red    | na |
| chrUn | 85867358 | 85868027 | 670  | CarSat1 | red    | na |
| chrUn | 85868054 | 85868523 | 470  | CarSat1 | red    | na |
| chrUn | 85868539 | 85869502 | 964  | CarSat1 | red    | na |
| chrUn | 85869529 | 85870239 | 711  | CarSat1 | red    | na |
| chrUn | 85870266 | 85870975 | 710  | CarSat1 | red    | na |
| chrUn | 85871002 | 85871713 | 712  | CarSat1 | red    | na |
| chrUn | 85872796 | 85874822 | 2027 | CarSat1 | red    | na |
| chrUn | 85874838 | 85876044 | 1207 | CarSat1 | red    | na |
| chrUn | 85876071 | 85877166 | 1096 | CarSat1 | red    | na |
| chrUn | 85878218 | 85879136 | 919  | CarSat1 | red    | na |
| chrUn | 85879163 | 85881348 | 2186 | CarSat1 | red    | na |
| chrUn | 85881375 | 85882085 | 711  | CarSat1 | red    | na |
| chrUn | 85882112 | 85882629 | 518  | CarSat1 | red    | na |
| chrUn | 85883636 | 85884262 | 627  | CarSat1 | red    | na |
| chrUn | 85884289 | 85884998 | 710  | CarSat1 | red    | na |
| chrUn | 85885025 | 85885734 | 710  | CarSat1 | red    | na |
| chrUn | 85885762 | 85886230 | 469  | CarSat1 | red    | na |
| chrUn | 85886246 | 85888048 | 1803 | CarSat1 | red    | na |
| chrUn | 85889056 | 85890368 | 1313 | CarSat1 | red    | na |
| chrUn | 85890383 | 85890510 | 128  | Carsat2 | orange | na |
| chrUn | 85890398 | 85891372 | 975  | CarSat1 | red    | na |
| chrUn | 85891399 | 85892360 | 962  | CarSat1 | red    | na |
| chrUn | 85892385 | 85893455 | 1071 | CarSat1 | red    | na |
| chrUn | 85894483 | 85898858 | 4376 | CarSat1 | red    | na |
| chrUn | 85899880 | 85901135 | 1256 | CarSat1 | red    | na |

|       |          |          |      |         |      |    |
|-------|----------|----------|------|---------|------|----|
| chrUn | 85901162 | 85901874 | 713  | CarSat1 | red  | na |
| chrUn | 85901901 | 85903348 | 1448 | CarSat1 | red  | na |
| chrUn | 85903375 | 85904282 | 908  | CarSat1 | red  | na |
| chrUn | 85905310 | 85906404 | 1095 | CarSat1 | red  | na |
| chrUn | 85906431 | 85907141 | 711  | CarSat1 | red  | na |
| chrUn | 85907168 | 85907636 | 469  | CarSat1 | red  | na |
| chrUn | 85907652 | 85908613 | 962  | CarSat1 | red  | na |
| chrUn | 85908640 | 85909109 | 470  | CarSat1 | red  | na |
| chrUn | 85909125 | 85909684 | 560  | CarSat1 | red  | na |
| chrUn | 85916097 | 85918183 | 2087 | CarSat1 | red  | na |
| chrUn | 85918210 | 85919387 | 1178 | CarSat1 | red  | na |
| chrUn | 85919417 | 85919907 | 491  | CarSat1 | red  | na |
| chrUn | 85919923 | 85920482 | 560  | CarSat1 | red  | na |
| chrUn | 85921517 | 85922393 | 877  | CarSat1 | red  | na |
| chrUn | 85922420 | 85923862 | 1443 | CarSat1 | red  | na |
| chrUn | 85923889 | 85925338 | 1450 | CarSat1 | red  | na |
| chrUn | 85925365 | 85925881 | 517  | CarSat1 | red  | na |
| chrUn | 85926902 | 85927753 | 852  | CarSat1 | red  | na |
| chrUn | 85927769 | 85928490 | 722  | CarSat1 | red  | na |
| chrUn | 85928506 | 85929227 | 722  | CarSat1 | red  | na |
| chrUn | 85929243 | 85930053 | 811  | CarSat1 | red  | na |
| chrUn | 85930269 | 85931267 | 999  | CarSat1 | red  | na |
| chrUn | 85932281 | 85932868 | 588  | CarSat1 | red  | na |
| chrUn | 85932895 | 85933890 | 996  | CarSat1 | red  | na |
| chrUn | 85933905 | 85934631 | 727  | CarSat1 | red  | na |
| chrUn | 85934646 | 85936658 | 2013 | CarSat1 | red  | na |
| chrUn | 85937686 | 85938362 | 677  | CarSat1 | red  | na |
| chrUn | 85938389 | 85941069 | 2681 | CarSat1 | red  | na |
| chrUn | 85941085 | 85942047 | 963  | CarSat1 | red  | na |
| chrUn | 85943052 | 85945150 | 2099 | CarSat1 | red  | na |
| chrUn | 85945177 | 85946140 | 964  | CarSat1 | red  | na |
| chrUn | 85946156 | 85947363 | 1208 | CarSat1 | red  | na |
| chrUn | 85953882 | 85955033 | 1152 | SAT1_CF | blue | na |
| chrUn | 85955044 | 85955152 | 109  | SAT1_CF | blue | na |
| chrUn | 85955198 | 85955696 | 499  | SAT1_CF | blue | na |
| chrUn | 85955718 | 85958142 | 2425 | SAT1_CF | blue | na |
| chrUn | 85959175 | 85959659 | 485  | CarSat1 | red  | na |
| chrUn | 85959684 | 85961145 | 1462 | CarSat1 | red  | na |
| chrUn | 85961161 | 85961880 | 720  | CarSat1 | red  | na |
| chrUn | 85961905 | 85962618 | 714  | CarSat1 | red  | na |
| chrUn | 85962634 | 85963484 | 851  | CarSat1 | red  | na |
| chrUn | 85964526 | 85965196 | 671  | CarSat1 | red  | na |

|       |          |          |      |         |        |    |
|-------|----------|----------|------|---------|--------|----|
| chrUn | 85965217 | 85966730 | 1514 | CarSat1 | red    | na |
| chrUn | 85966757 | 85968309 | 1553 | CarSat1 | red    | na |
| chrUn | 85968330 | 85968861 | 532  | CarSat1 | red    | na |
| chrUn | 85969882 | 85969981 | 100  | Carsat2 | orange | na |
| chrUn | 85969900 | 85970794 | 895  | CarSat1 | red    | na |
| chrUn | 85970810 | 85972269 | 1460 | CarSat1 | red    | na |
| chrUn | 85972285 | 85973005 | 721  | CarSat1 | red    | na |
| chrUn | 85973030 | 85973475 | 446  | CarSat1 | red    | na |
| chrUn | 85973516 | 85974184 | 669  | CarSat1 | red    | na |
| chrUn | 85975191 | 85976477 | 1287 | CarSat1 | red    | na |
| chrUn | 85976492 | 85978164 | 1673 | CarSat1 | red    | na |
| chrUn | 85978188 | 85979499 | 1312 | CarSat1 | red    | na |
| chrUn | 85980501 | 85983848 | 3348 | CarSat1 | red    | na |
| chrUn | 85983875 | 85984787 | 913  | CarSat1 | red    | na |
| chrUn | 85985805 | 85987064 | 1260 | CarSat1 | red    | na |
| chrUn | 85987089 | 85988478 | 1390 | CarSat1 | red    | na |
| chrUn | 85988672 | 85990102 | 1431 | CarSat1 | red    | na |
| chrUn | 85991162 | 85992320 | 1159 | CarSat1 | red    | na |
| chrUn | 85992335 | 85993795 | 1461 | CarSat1 | red    | na |
| chrUn | 85993810 | 85994516 | 707  | CarSat1 | red    | na |
| chrUn | 85994546 | 85995388 | 843  | CarSat1 | red    | na |
| chrUn | 85996388 | 85997087 | 700  | CarSat1 | red    | na |
| chrUn | 85997121 | 85998570 | 1450 | CarSat1 | red    | na |
| chrUn | 85998595 | 85999298 | 704  | CarSat1 | red    | na |
| chrUn | 85999323 | 86000045 | 723  | CarSat1 | red    | na |
| chrUn | 86000070 | 86000662 | 593  | CarSat1 | red    | na |
| chrUn | 86012263 | 86014657 | 2395 | CarSat1 | red    | na |
| chrUn | 86014682 | 86016511 | 1830 | CarSat1 | red    | na |
| chrUn | 86017513 | 86019110 | 1598 | CarSat1 | red    | na |
| chrUn | 86019137 | 86020585 | 1449 | CarSat1 | red    | na |
| chrUn | 86020612 | 86021790 | 1179 | CarSat1 | red    | na |
| chrUn | 86022790 | 86023213 | 424  | CarSat1 | red    | na |
| chrUn | 86023228 | 86023355 | 128  | Carsat2 | orange | na |
| chrUn | 86023243 | 86024225 | 983  | CarSat1 | red    | na |
| chrUn | 86024246 | 86025427 | 1182 | CarSat1 | red    | na |
| chrUn | 86025457 | 86025943 | 487  | CarSat1 | red    | na |
| chrUn | 86025967 | 86027053 | 1087 | CarSat1 | red    | na |
| chrUn | 86028073 | 86029016 | 944  | CarSat1 | red    | na |
| chrUn | 86029043 | 86029752 | 710  | CarSat1 | red    | na |
| chrUn | 86029779 | 86031227 | 1449 | CarSat1 | red    | na |
| chrUn | 86031254 | 86032337 | 1084 | CarSat1 | red    | na |
| chrUn | 86038594 | 86039851 | 1258 | CarSat1 | red    | na |

|       |          |          |      |         |     |    |
|-------|----------|----------|------|---------|-----|----|
| chrUn | 86039881 | 86041110 | 1230 | CarSat1 | red | na |
| chrUn | 86041126 | 86042335 | 1210 | CarSat1 | red | na |
| chrUn | 86042360 | 86042830 | 471  | CarSat1 | red | na |
| chrUn | 86043843 | 86045029 | 1187 | CarSat1 | red | na |
| chrUn | 86045056 | 86046020 | 965  | CarSat1 | red | na |
| chrUn | 86046046 | 86046505 | 460  | CarSat1 | red | na |
| chrUn | 86046532 | 86047494 | 963  | CarSat1 | red | na |
| chrUn | 86047510 | 86048070 | 561  | CarSat1 | red | na |
| chrUn | 86049117 | 86051110 | 1994 | CarSat1 | red | na |
| chrUn | 86051137 | 86051847 | 711  | CarSat1 | red | na |
| chrUn | 86051874 | 86052584 | 711  | CarSat1 | red | na |
| chrUn | 86052611 | 86053287 | 677  | CarSat1 | red | na |
| chrUn | 86054333 | 86055065 | 733  | CarSat1 | red | na |
| chrUn | 86055098 | 86056616 | 1519 | CarSat1 | red | na |
| chrUn | 86056799 | 86056953 | 155  | CarSat1 | red | na |
| chrUn | 86056983 | 86057466 | 484  | CarSat1 | red | na |
| chrUn | 86057490 | 86058553 | 1064 | CarSat1 | red | na |
| chrUn | 86059553 | 86061080 | 1528 | CarSat1 | red | na |
| chrUn | 86061104 | 86062326 | 1223 | CarSat1 | red | na |
| chrUn | 86062356 | 86063783 | 1428 | CarSat1 | red | na |
| chrUn | 86064808 | 86067159 | 2352 | CarSat1 | red | na |
| chrUn | 86067186 | 86067655 | 470  | CarSat1 | red | na |
| chrUn | 86067671 | 86069008 | 1338 | CarSat1 | red | na |
| chrUn | 86070018 | 86070627 | 610  | CarSat1 | red | na |
| chrUn | 86070643 | 86071361 | 719  | CarSat1 | red | na |
| chrUn | 86071377 | 86072584 | 1208 | CarSat1 | red | na |
| chrUn | 86072611 | 86073321 | 711  | CarSat1 | red | na |
| chrUn | 86073348 | 86074237 | 890  | CarSat1 | red | na |
| chrUn | 86075288 | 86076089 | 802  | CarSat1 | red | na |
| chrUn | 86076105 | 86076825 | 721  | CarSat1 | red | na |
| chrUn | 86076841 | 86078046 | 1206 | CarSat1 | red | na |
| chrUn | 86078073 | 86079343 | 1271 | CarSat1 | red | na |
| chrUn | 86080443 | 86081696 | 1254 | CarSat1 | red | na |
| chrUn | 86081712 | 86082433 | 722  | CarSat1 | red | na |
| chrUn | 86082449 | 86083909 | 1461 | CarSat1 | red | na |
| chrUn | 86083925 | 86084636 | 712  | CarSat1 | red | na |
| chrUn | 86085647 | 86086689 | 1043 | CarSat1 | red | na |
| chrUn | 86086716 | 86087185 | 470  | CarSat1 | red | na |
| chrUn | 86087201 | 86088162 | 962  | CarSat1 | red | na |
| chrUn | 86088189 | 86089834 | 1646 | CarSat1 | red | na |
| chrUn | 86090882 | 86091451 | 570  | CarSat1 | red | na |
| chrUn | 86091478 | 86092189 | 712  | CarSat1 | red | na |



|       |          |          |      |         |        |    |
|-------|----------|----------|------|---------|--------|----|
| chrUn | 86092216 | 86092928 | 713  | CarSat1 | red    | na |
| chrUn | 86092955 | 86093665 | 711  | CarSat1 | red    | na |
| chrUn | 86093692 | 86095019 | 1328 | CarSat1 | red    | na |
| chrUn | 86096026 | 86096731 | 706  | CarSat1 | red    | na |
| chrUn | 86096758 | 86098625 | 1868 | CarSat1 | red    | na |
| chrUn | 86098642 | 86100201 | 1560 | CarSat1 | red    | na |
| chrUn | 86101212 | 86102082 | 871  | CarSat1 | red    | na |
| chrUn | 86102097 | 86103537 | 1441 | CarSat1 | red    | na |
| chrUn | 86103569 | 86104502 | 934  | CarSat1 | red    | na |
| chrUn | 86104518 | 86105369 | 852  | CarSat1 | red    | na |
| chrUn | 86106389 | 86106875 | 487  | CarSat1 | red    | na |
| chrUn | 86106905 | 86108581 | 1677 | CarSat1 | red    | na |
| chrUn | 86108605 | 86110552 | 1948 | CarSat1 | red    | na |
| chrUn | 86111552 | 86112791 | 1240 | CarSat1 | red    | na |
| chrUn | 86112812 | 86113246 | 435  | CarSat1 | red    | na |
| chrUn | 86113282 | 86115700 | 2419 | CarSat1 | red    | na |
| chrUn | 86116717 | 86119987 | 3271 | CarSat1 | red    | na |
| chrUn | 86120002 | 86120128 | 127  | Carsat2 | orange | na |
| chrUn | 86120017 | 86120867 | 851  | CarSat1 | red    | na |
| chrUn | 86121877 | 86122335 | 459  | CarSat1 | red    | na |
| chrUn | 86122362 | 86123090 | 729  | CarSat1 | red    | na |
| chrUn | 86123117 | 86124065 | 949  | CarSat1 | red    | na |
| chrUn | 86124100 | 86124821 | 722  | CarSat1 | red    | na |
| chrUn | 86124846 | 86126010 | 1165 | CarSat1 | red    | na |
| chrUn | 86132150 | 86132751 | 602  | CarSat1 | red    | na |
| chrUn | 86132778 | 86133741 | 964  | CarSat1 | red    | na |
| chrUn | 86133757 | 86134226 | 470  | CarSat1 | red    | na |
| chrUn | 86134253 | 86135701 | 1449 | CarSat1 | red    | na |
| chrUn | 86135728 | 86136257 | 530  | CarSat1 | red    | na |
| chrUn | 86137272 | 86137913 | 642  | CarSat1 | red    | na |
| chrUn | 86137928 | 86138055 | 128  | Carsat2 | orange | na |
| chrUn | 86137943 | 86138650 | 708  | CarSat1 | red    | na |
| chrUn | 86138680 | 86140123 | 1444 | CarSat1 | red    | na |
| chrUn | 86140153 | 86140860 | 708  | CarSat1 | red    | na |
| chrUn | 86140875 | 86141002 | 128  | Carsat2 | orange | na |
| chrUn | 86140890 | 86141376 | 487  | CarSat1 | red    | na |
| chrUn | 86147543 | 86148604 | 1062 | CarSat1 | red    | na |
| chrUn | 86148631 | 86149809 | 1179 | CarSat1 | red    | na |
| chrUn | 86149839 | 86151642 | 1804 | CarSat1 | red    | na |
| chrUn | 86157759 | 86158584 | 826  | CarSat1 | red    | na |
| chrUn | 86158611 | 86159044 | 434  | CarSat1 | red    | na |
| chrUn | 86159081 | 86160059 | 979  | CarSat1 | red    | na |

|       |          |          |      |         |        |    |
|-------|----------|----------|------|---------|--------|----|
| chrUn | 86160086 | 86161255 | 1170 | CarSat1 | red    | na |
| chrUn | 86161292 | 86161865 | 574  | CarSat1 | red    | na |
| chrUn | 86162933 | 86164368 | 1436 | CarSat1 | red    | na |
| chrUn | 86164405 | 86165112 | 708  | CarSat1 | red    | na |
| chrUn | 86165127 | 86165253 | 127  | Carsat2 | orange | na |
| chrUn | 86165142 | 86166963 | 1822 | CarSat1 | red    | na |
| chrUn | 86167977 | 86170081 | 2105 | CarSat1 | red    | na |
| chrUn | 86170114 | 86170599 | 486  | CarSat1 | red    | na |
| chrUn | 86170629 | 86171350 | 722  | CarSat1 | red    | na |
| chrUn | 86171368 | 86172064 | 697  | CarSat1 | red    | na |
| chrUn | 86173086 | 86173858 | 773  | CarSat1 | red    | na |
| chrUn | 86173885 | 86174595 | 711  | CarSat1 | red    | na |
| chrUn | 86174622 | 86175332 | 711  | CarSat1 | red    | na |
| chrUn | 86175359 | 86176068 | 710  | CarSat1 | red    | na |
| chrUn | 86176095 | 86177134 | 1040 | CarSat1 | red    | na |
| chrUn | 86178136 | 86179684 | 1549 | CarSat1 | red    | na |
| chrUn | 86179700 | 86180419 | 720  | CarSat1 | red    | na |
| chrUn | 86180435 | 86181156 | 722  | CarSat1 | red    | na |
| chrUn | 86181172 | 86182190 | 1019 | CarSat1 | red    | na |
| chrUn | 86183199 | 86186249 | 3051 | CarSat1 | red    | na |
| chrUn | 86186276 | 86187226 | 951  | CarSat1 | red    | na |
| chrUn | 86188264 | 86189172 | 909  | CarSat1 | red    | na |
| chrUn | 86189188 | 86189910 | 723  | CarSat1 | red    | na |
| chrUn | 86189926 | 86190634 | 709  | CarSat1 | red    | na |
| chrUn | 86190664 | 86192319 | 1656 | CarSat1 | red    | na |
| chrUn | 86193321 | 86194595 | 1275 | CarSat1 | red    | na |
| chrUn | 86194625 | 86195801 | 1177 | CarSat1 | red    | na |
| chrUn | 86195828 | 86197277 | 1450 | CarSat1 | red    | na |
| chrUn | 86198353 | 86199732 | 1380 | CarSat1 | red    | na |
| chrUn | 86199759 | 86200937 | 1179 | CarSat1 | red    | na |
| chrUn | 86200967 | 86202368 | 1402 | CarSat1 | red    | na |
| chrUn | 86203403 | 86204043 | 641  | CarSat1 | red    | na |
| chrUn | 86204058 | 86207374 | 3317 | CarSat1 | red    | na |
| chrUn | 86208419 | 86209047 | 629  | CarSat1 | red    | na |
| chrUn | 86209080 | 86210301 | 1222 | CarSat1 | red    | na |
| chrUn | 86210331 | 86211773 | 1443 | CarSat1 | red    | na |
| chrUn | 86211803 | 86212380 | 578  | CarSat1 | red    | na |
| chrUn | 86213381 | 86216581 | 3201 | CarSat1 | red    | na |
| chrUn | 86216605 | 86217357 | 753  | CarSat1 | red    | na |
| chrUn | 86218362 | 86218879 | 518  | CarSat1 | red    | na |
| chrUn | 86218906 | 86221338 | 2433 | CarSat1 | red    | na |
| chrUn | 86221354 | 86222286 | 933  | CarSat1 | red    | na |

|       |          |          |      |         |      |    |
|-------|----------|----------|------|---------|------|----|
| chrUn | 86223306 | 86224403 | 1098 | CarSat1 | red  | na |
| chrUn | 86224419 | 86225623 | 1205 | CarSat1 | red  | na |
| chrUn | 86225650 | 86226612 | 963  | CarSat1 | red  | na |
| chrUn | 86226628 | 86227246 | 619  | CarSat1 | red  | na |
| chrUn | 86228314 | 86229023 | 710  | CarSat1 | red  | na |
| chrUn | 86229050 | 86230369 | 1320 | CarSat1 | red  | na |
| chrUn | 86230385 | 86231592 | 1208 | CarSat1 | red  | na |
| chrUn | 86231617 | 86232170 | 554  | CarSat1 | red  | na |
| chrUn | 86233182 | 86233735 | 554  | CarSat1 | red  | na |
| chrUn | 86233762 | 86234724 | 963  | CarSat1 | red  | na |
| chrUn | 86234740 | 86236197 | 1458 | CarSat1 | red  | na |
| chrUn | 86236213 | 86237096 | 884  | CarSat1 | red  | na |
| chrUn | 86238099 | 86238913 | 815  | CarSat1 | red  | na |
| chrUn | 86238929 | 86239891 | 963  | CarSat1 | red  | na |
| chrUn | 86239918 | 86241123 | 1206 | CarSat1 | red  | na |
| chrUn | 86241139 | 86241992 | 854  | CarSat1 | red  | na |
| chrUn | 86243026 | 86243767 | 742  | CarSat1 | red  | na |
| chrUn | 86243792 | 86244727 | 936  | CarSat1 | red  | na |
| chrUn | 86244757 | 86245735 | 979  | CarSat1 | red  | na |
| chrUn | 86245762 | 86246855 | 1094 | CarSat1 | red  | na |
| chrUn | 86247874 | 86250135 | 2262 | CarSat1 | red  | na |
| chrUn | 86250155 | 86251715 | 1561 | CarSat1 | red  | na |
| chrUn | 86252721 | 86253615 | 895  | CarSat1 | red  | na |
| chrUn | 86253642 | 86254352 | 711  | CarSat1 | red  | na |
| chrUn | 86254379 | 86255089 | 711  | CarSat1 | red  | na |
| chrUn | 86255116 | 86255826 | 711  | CarSat1 | red  | na |
| chrUn | 86255853 | 86256517 | 665  | CarSat1 | red  | na |
| chrUn | 86257562 | 86258359 | 798  | SAT1_CF | blue | na |
| chrUn | 86258371 | 86259048 | 678  | SAT1_CF | blue | na |
| chrUn | 86259091 | 86259916 | 826  | SAT1_CF | blue | na |
| chrUn | 86259930 | 86260783 | 854  | SAT1_CF | blue | na |
| chrUn | 86260804 | 86261370 | 567  | SAT1_CF | blue | na |
| chrUn | 86262550 | 86265123 | 2574 | CarSat1 | red  | na |
| chrUn | 86265139 | 86266159 | 1021 | CarSat1 | red  | na |
| chrUn | 86267159 | 86268183 | 1025 | CarSat1 | red  | na |
| chrUn | 86268204 | 86269800 | 1597 | CarSat1 | red  | na |
| chrUn | 86269831 | 86270938 | 1108 | CarSat1 | red  | na |
| chrUn | 86271939 | 86273178 | 1240 | CarSat1 | red  | na |
| chrUn | 86273205 | 86273915 | 711  | CarSat1 | red  | na |
| chrUn | 86273942 | 86275714 | 1773 | CarSat1 | red  | na |
| chrUn | 86276743 | 86279182 | 2440 | CarSat1 | red  | na |
| chrUn | 86279198 | 86280428 | 1231 | CarSat1 | red  | na |

|       |          |          |      |         |      |    |
|-------|----------|----------|------|---------|------|----|
| chrUn | 86281481 | 86281520 | 40   | CarSat1 | red  | na |
| chrUn | 86281717 | 86282865 | 1149 | CarSat1 | red  | na |
| chrUn | 86282892 | 86283602 | 711  | CarSat1 | red  | na |
| chrUn | 86283629 | 86285225 | 1597 | CarSat1 | red  | na |
| chrUn | 86286229 | 86286900 | 672  | CarSat1 | red  | na |
| chrUn | 86286916 | 86287385 | 470  | CarSat1 | red  | na |
| chrUn | 86287412 | 86289111 | 1700 | CarSat1 | red  | na |
| chrUn | 86289127 | 86289954 | 828  | CarSat1 | red  | na |
| chrUn | 86290960 | 86291601 | 642  | CarSat1 | red  | na |
| chrUn | 86291628 | 86294671 | 3044 | CarSat1 | red  | na |
| chrUn | 86295686 | 86296991 | 1306 | CarSat1 | red  | na |
| chrUn | 86297018 | 86297729 | 712  | CarSat1 | red  | na |
| chrUn | 86297756 | 86299394 | 1639 | CarSat1 | red  | na |
| chrUn | 86300397 | 86300916 | 520  | CarSat1 | red  | na |
| chrUn | 86300943 | 86302138 | 1196 | CarSat1 | red  | na |
| chrUn | 86302163 | 86302885 | 723  | CarSat1 | red  | na |
| chrUn | 86302901 | 86304100 | 1200 | CarSat1 | red  | na |
| chrUn | 86305108 | 86306421 | 1314 | CarSat1 | red  | na |
| chrUn | 86306437 | 86307159 | 723  | CarSat1 | red  | na |
| chrUn | 86307175 | 86307896 | 722  | CarSat1 | red  | na |
| chrUn | 86307912 | 86308803 | 892  | CarSat1 | red  | na |
| chrUn | 86309803 | 86310466 | 664  | CarSat1 | red  | na |
| chrUn | 86310491 | 86311194 | 704  | CarSat1 | red  | na |
| chrUn | 86311219 | 86311940 | 722  | CarSat1 | red  | na |
| chrUn | 86311956 | 86312677 | 722  | CarSat1 | red  | na |
| chrUn | 86312693 | 86313495 | 803  | CarSat1 | red  | na |
| chrUn | 86314500 | 86318145 | 3646 | CarSat1 | red  | na |
| chrUn | 86319157 | 86320105 | 949  | CarSat1 | red  | na |
| chrUn | 86320126 | 86322781 | 2656 | CarSat1 | red  | na |
| chrUn | 86323801 | 86324446 | 646  | CarSat1 | red  | na |
| chrUn | 86324473 | 86326189 | 1717 | CarSat1 | red  | na |
| chrUn | 86326218 | 86327390 | 1173 | CarSat1 | red  | na |
| chrUn | 86328533 | 86330366 | 1834 | SAT1_CF | blue | na |
| chrUn | 86330400 | 86332045 | 1646 | SAT1_CF | blue | na |
| chrUn | 86333054 | 86334142 | 1089 | CarSat1 | red  | na |
| chrUn | 86334158 | 86334879 | 722  | CarSat1 | red  | na |
| chrUn | 86334895 | 86336653 | 1759 | CarSat1 | red  | na |
| chrUn | 86337670 | 86339783 | 2114 | CarSat1 | red  | na |
| chrUn | 86339799 | 86341258 | 1460 | CarSat1 | red  | na |
| chrUn | 86342304 | 86343199 | 896  | CarSat1 | red  | na |
| chrUn | 86343242 | 86344204 | 963  | CarSat1 | red  | na |
| chrUn | 86344220 | 86344941 | 722  | CarSat1 | red  | na |

|       |          |          |      |         |        |    |
|-------|----------|----------|------|---------|--------|----|
| chrUn | 86344952 | 86345871 | 920  | CarSat1 | red    | na |
| chrUn | 86346884 | 86348761 | 1878 | CarSat1 | red    | na |
| chrUn | 86348788 | 86350464 | 1677 | CarSat1 | red    | na |
| chrUn | 86351464 | 86354133 | 2670 | CarSat1 | red    | na |
| chrUn | 86354149 | 86354620 | 472  | CarSat1 | red    | na |
| chrUn | 86354645 | 86355044 | 400  | CarSat1 | red    | na |
| chrUn | 86356050 | 86358366 | 2317 | CarSat1 | red    | na |
| chrUn | 86358393 | 86359600 | 1208 | CarSat1 | red    | na |
| chrUn | 86360635 | 86361427 | 793  | CarSat1 | red    | na |
| chrUn | 86361452 | 86362159 | 708  | CarSat1 | red    | na |
| chrUn | 86362175 | 86362640 | 466  | CarSat1 | red    | na |
| chrUn | 86362667 | 86363629 | 963  | CarSat1 | red    | na |
| chrUn | 86363645 | 86364204 | 560  | CarSat1 | red    | na |
| chrUn | 86365210 | 86368764 | 3555 | CarSat1 | red    | na |
| chrUn | 86369770 | 86371168 | 1399 | CarSat1 | red    | na |
| chrUn | 86371185 | 86372411 | 1227 | CarSat1 | red    | na |
| chrUn | 86372441 | 86373289 | 849  | CarSat1 | red    | na |
| chrUn | 86374684 | 86375938 | 1255 | CarSat1 | red    | na |
| chrUn | 86375965 | 86376676 | 712  | CarSat1 | red    | na |
| chrUn | 86376703 | 86377785 | 1083 | CarSat1 | red    | na |
| chrUn | 86378811 | 86379305 | 495  | CarSat1 | red    | na |
| chrUn | 86379332 | 86381046 | 1715 | CarSat1 | red    | na |
| chrUn | 86381082 | 86382251 | 1170 | CarSat1 | red    | na |
| chrUn | 86383285 | 86384325 | 1041 | CarSat1 | red    | na |
| chrUn | 86384352 | 86385559 | 1208 | CarSat1 | red    | na |
| chrUn | 86385575 | 86386763 | 1189 | CarSat1 | red    | na |
| chrUn | 86387784 | 86389228 | 1445 | CarSat1 | red    | na |
| chrUn | 86389243 | 86389369 | 127  | Carsat2 | orange | na |
| chrUn | 86389258 | 86391215 | 1958 | CarSat1 | red    | na |
| chrUn | 86392243 | 86393690 | 1448 | CarSat1 | red    | na |
| chrUn | 86393717 | 86394428 | 712  | CarSat1 | red    | na |
| chrUn | 86394455 | 86395164 | 710  | CarSat1 | red    | na |
| chrUn | 86395191 | 86395649 | 459  | CarSat1 | red    | na |
| chrUn | 86396691 | 86398074 | 1384 | CarSat1 | red    | na |
| chrUn | 86398092 | 86398541 | 450  | CarSat1 | red    | na |
| chrUn | 86398571 | 86400103 | 1533 | CarSat1 | red    | na |
| chrUn | 86401113 | 86402905 | 1793 | CarSat1 | red    | na |
| chrUn | 86402935 | 86404524 | 1590 | CarSat1 | red    | na |
| chrUn | 86405543 | 86406832 | 1290 | CarSat1 | red    | na |
| chrUn | 86406859 | 86408950 | 2092 | CarSat1 | red    | na |
| chrUn | 86409989 | 86413338 | 3350 | CarSat1 | red    | na |
| chrUn | 86414609 | 86415703 | 1095 | CarSat1 | red    | na |

|       |          |          |      |         |        |    |
|-------|----------|----------|------|---------|--------|----|
| chrUn | 86415719 | 86416187 | 469  | CarSat1 | red    | na |
| chrUn | 86416214 | 86416925 | 712  | CarSat1 | red    | na |
| chrUn | 86416952 | 86417734 | 783  | CarSat1 | red    | na |
| chrUn | 86418743 | 86418857 | 115  | Carsat2 | orange | na |
| chrUn | 86418765 | 86419234 | 470  | CarSat1 | red    | na |
| chrUn | 86419261 | 86419701 | 441  | CarSat1 | red    | na |
| chrUn | 86419731 | 86421448 | 1718 | CarSat1 | red    | na |
| chrUn | 86421475 | 86422120 | 646  | CarSat1 | red    | na |
| chrUn | 86423133 | 86425220 | 2088 | CarSat1 | red    | na |
| chrUn | 86425247 | 86426494 | 1248 | CarSat1 | red    | na |
| chrUn | 86427511 | 86429561 | 2051 | CarSat1 | red    | na |
| chrUn | 86429588 | 86430299 | 712  | CarSat1 | red    | na |
| chrUn | 86430326 | 86430836 | 511  | CarSat1 | red    | na |
| chrUn | 86431836 | 86432422 | 587  | CarSat1 | red    | na |
| chrUn | 86432449 | 86435158 | 2710 | CarSat1 | red    | na |
| chrUn | 86436167 | 86436838 | 672  | CarSat1 | red    | na |
| chrUn | 86436863 | 86438526 | 1664 | CarSat1 | red    | na |
| chrUn | 86438556 | 86439434 | 879  | CarSat1 | red    | na |
| chrUn | 86440479 | 86441675 | 1197 | CarSat1 | red    | na |
| chrUn | 86441702 | 86443695 | 1994 | CarSat1 | red    | na |
| chrUn | 86448958 | 86450406 | 1449 | CarSat1 | red    | na |
| chrUn | 86450422 | 86452183 | 1762 | CarSat1 | red    | na |
| chrUn | 86453183 | 86453823 | 641  | CarSat1 | red    | na |
| chrUn | 86453850 | 86455296 | 1447 | CarSat1 | red    | na |
| chrUn | 86455323 | 86456275 | 953  | CarSat1 | red    | na |
| chrUn | 86457331 | 86460450 | 3120 | CarSat1 | red    | na |
| chrUn | 86461473 | 86462406 | 934  | SAT1_CF | blue   | na |
| chrUn | 86462426 | 86463762 | 1337 | SAT1_CF | blue   | na |
| chrUn | 86463789 | 86464462 | 674  | SAT1_CF | blue   | na |
| chrUn | 86469524 | 86470203 | 680  | CarSat1 | red    | na |
| chrUn | 86470230 | 86470940 | 711  | CarSat1 | red    | na |
| chrUn | 86470967 | 86472519 | 1553 | CarSat1 | red    | na |
| chrUn | 86473521 | 86474381 | 861  | CarSat1 | red    | na |
| chrUn | 86474397 | 86475105 | 709  | CarSat1 | red    | na |
| chrUn | 86475135 | 86476455 | 1321 | CarSat1 | red    | na |
| chrUn | 86477474 | 86478989 | 1516 | CarSat1 | red    | na |
| chrUn | 86479005 | 86480407 | 1403 | CarSat1 | red    | na |
| chrUn | 86481409 | 86482004 | 596  | CarSat1 | red    | na |
| chrUn | 86482032 | 86483063 | 1032 | CarSat1 | red    | na |
| chrUn | 86483243 | 86483397 | 155  | CarSat1 | red    | na |
| chrUn | 86483427 | 86483989 | 563  | CarSat1 | red    | na |
| chrUn | 86484170 | 86484242 | 73   | CarSat1 | red    | na |

|       |          |          |      |          |      |    |
|-------|----------|----------|------|----------|------|----|
| chrUn | 86485263 | 86488077 | 2815 | CarSat1  | red  | na |
| chrUn | 86489082 | 86489673 | 592  | CarSat1  | red  | na |
| chrUn | 86489689 | 86490411 | 723  | CarSat1  | red  | na |
| chrUn | 86490427 | 86491852 | 1426 | CarSat1  | red  | na |
| chrUn | 86492896 | 86494101 | 1206 | CarSat1  | red  | na |
| chrUn | 86494128 | 86495658 | 1531 | CarSat1  | red  | na |
| chrUn | 86500399 | 86502496 | 2098 | CarSat1  | red  | na |
| chrUn | 86502526 | 86503096 | 571  | CarSat1  | red  | na |
| chrUn | 86504109 | 86505172 | 1064 | CarSat1  | red  | na |
| chrUn | 86505188 | 86506151 | 964  | CarSat1  | red  | na |
| chrUn | 86506178 | 86506793 | 616  | CarSat1  | red  | na |
| chrUn | 86507800 | 86510438 | 2639 | CarSat1  | red  | na |
| chrUn | 86511449 | 86511917 | 469  | CarSat1  | red  | na |
| chrUn | 86511944 | 86513388 | 1445 | CarSat1  | red  | na |
| chrUn | 86513414 | 86513932 | 519  | CarSat1  | red  | na |
| chrUn | 86514944 | 86516567 | 1624 | CarSat1  | red  | na |
| chrUn | 86516594 | 86517293 | 700  | CarSat1  | red  | na |
| chrUn | 86518299 | 86520330 | 2032 | SAT1_CF  | blue | na |
| chrUn | 86520342 | 86520609 | 268  | SAT1_CF  | blue | na |
| chrUn | 86524877 | 86525642 | 766  | SAT1_CF  | blue | na |
| chrUn | 86525655 | 86527003 | 1349 | SAT1_CF  | blue | na |
| chrUn | 86528016 | 86530045 | 2030 | CarSat1  | red  | na |
| chrUn | 86534065 | 86535043 | 979  | CarSat1  | red  | na |
| chrUn | 86535070 | 86535869 | 800  | CarSat1  | red  | na |
| chrX  | 4139     | 4347     | 209  | Sat42CF  | na   | na |
| chrX  | 10950    | 11080    | 131  | Sat50CF  | na   | na |
| chrX  | 11392    | 11562    | 171  | Sat50CF  | na   | na |
| chrX  | 99235    | 99863    | 629  | Sat49CF  | na   | na |
| chrX  | 297271   | 297583   | 313  | Sat102CF | na   | na |
| chrX  | 321382   | 322198   | 817  | Sat157CF | na   | na |
| chrX  | 321511   | 322562   | 1052 | Sat157CF | na   | na |
| chrX  | 415114   | 415419   | 306  | Sat16CF  | na   | na |
| chrX  | 581923   | 582302   | 380  | Sat106CF | na   | na |
| chrX  | 597065   | 598124   | 1060 | Sat19CF  | na   | na |
| chrX  | 607412   | 607907   | 496  | Sat147CF | na   | na |
| chrX  | 607462   | 608756   | 1295 | Sat147CF | na   | na |
| chrX  | 608519   | 608786   | 268  | Sat147CF | na   | na |
| chrX  | 640908   | 641229   | 322  | Sat50CF  | na   | na |
| chrX  | 680228   | 680603   | 376  | Sat27CF  | na   | na |
| chrX  | 680488   | 680656   | 169  | Sat27CF  | na   | na |
| chrX  | 691933   | 692472   | 540  | Sat21CF  | na   | na |
| chrX  | 694444   | 695145   | 702  | Sat37CF  | na   | na |

|      |         |         |               |       |    |
|------|---------|---------|---------------|-------|----|
| chrX | 710698  | 711041  | 344 Sat37CF   | na    | na |
| chrX | 848609  | 848969  | 361 Sat5CF    | stalk | na |
| chrX | 859741  | 859882  | 142 CarSat1   | red   | na |
| chrX | 1307799 | 1307890 | 92 Sat116CF   | na    | na |
| chrX | 1307907 | 1307996 | 90 Sat116CF   | na    | na |
| chrX | 1307917 | 1309273 | 1357 Sat116CF | na    | na |
| chrX | 1308990 | 1309298 | 309 Sat116CF  | na    | na |
| chrX | 1363607 | 1363649 | 43 Sat16CF    | na    | na |
| chrX | 1363715 | 1363732 | 18 Sat16CF    | na    | na |
| chrX | 1363980 | 1364373 | 394 Sat5CF    | stalk | na |
| chrX | 1375941 | 1376267 | 327 Sat102CF  | na    | na |
| chrX | 1818291 | 1818424 | 134 Sat92CF   | na    | na |
| chrX | 1818308 | 1819747 | 1440 Sat92CF  | na    | na |
| chrX | 1819632 | 1819766 | 135 Sat92CF   | na    | na |
| chrX | 1984243 | 1984420 | 178 Sat96CF   | na    | na |
| chrX | 1984910 | 1985559 | 650 Sat96CF   | na    | na |
| chrX | 2113422 | 2113624 | 203 Sat19CF   | na    | na |
| chrX | 2156084 | 2156195 | 112 Sat67CF   | na    | na |
| chrX | 2316464 | 2316545 | 82 Sat152CF   | na    | na |
| chrX | 3064607 | 3066389 | 1783 Sat121CF | na    | na |
| chrX | 3076834 | 3076980 | 147 Sat94CF   | na    | na |
| chrX | 3076861 | 3077250 | 390 Sat94CF   | na    | na |
| chrX | 3076906 | 3078059 | 1154 Sat94CF  | na    | na |
| chrX | 3077954 | 3078077 | 124 Sat94CF   | na    | na |
| chrX | 4244164 | 4244628 | 465 Sat122CF  | na    | na |
| chrX | 4244303 | 4245648 | 1346 Sat122CF | na    | na |
| chrX | 4245805 | 4245948 | 144 Sat122CF  | na    | na |
| chrX | 4316475 | 4317632 | 1158 Sat165CF | na    | na |
| chrX | 4317500 | 4317657 | 158 Sat165CF  | na    | na |
| chrX | 4379674 | 4380150 | 477 Sat52CF   | na    | na |
| chrX | 4379885 | 4380181 | 297 Sat52CF   | na    | na |
| chrX | 4554794 | 4555064 | 271 Sat100CF  | na    | na |
| chrX | 4628829 | 4629026 | 198 Sat4CF    | lred  | na |
| chrX | 6096052 | 6096145 | 94 Sat21CF    | na    | na |
| chrX | 6211670 | 6212139 | 470 Sat42CF   | na    | na |
| chrX | 6211709 | 6212304 | 596 Sat42CF   | na    | na |
| chrX | 6712848 | 6713033 | 186 Sat30CF   | na    | na |
| chrX | 6961229 | 6961288 | 60 Sat56CF    | na    | na |
| chrX | 7787284 | 7787336 | 53 Sat36CF    | na    | na |
| chrX | 9162314 | 9162611 | 298 Sat149CF  | na    | na |
| chrX | 9162347 | 9162612 | 266 Sat149CF  | na    | na |
| chrX | 9594047 | 9594124 | 78 Sat33CF    | na    | na |



|      |          |          |               |        |    |
|------|----------|----------|---------------|--------|----|
| chrX | 17624948 | 17625094 | 147 Sat30CF   | na     | na |
| chrX | 18153296 | 18153357 | 62 Sat71CF    | na     | na |
| chrX | 18986071 | 18986125 | 55 Sat166CF   | na     | na |
| chrX | 19833136 | 19833360 | 225 Sat33CF   | na     | na |
| chrX | 19833136 | 19833360 | 225 Sat33CF   | na     | na |
| chrX | 19833713 | 19833826 | 114 Sat33CF   | na     | na |
| chrX | 22330451 | 22331595 | 1145 Sat8CF   | dgreen | na |
| chrX | 22330646 | 22331898 | 1253 Sat8CF   | dgreen | na |
| chrX | 22331079 | 22332509 | 1431 Sat8CF   | dgreen | na |
| chrX | 22332603 | 22334033 | 1431 Sat8CF   | dgreen | na |
| chrX | 22334127 | 22335557 | 1431 Sat8CF   | dgreen | na |
| chrX | 22334734 | 22335830 | 1097 Sat8CF   | dgreen | na |
| chrX | 22335868 | 22336491 | 624 Sat8CF    | dgreen | na |
| chrX | 22336528 | 22337152 | 625 Sat8CF    | dgreen | na |
| chrX | 22337189 | 22338143 | 955 Sat8CF    | dgreen | na |
| chrX | 22337322 | 22338739 | 1418 Sat8CF   | dgreen | na |
| chrX | 22337288 | 22337534 | 247 Sat8CF    | dgreen | na |
| chrX | 22338851 | 22340280 | 1430 Sat8CF   | dgreen | na |
| chrX | 22339458 | 22340891 | 1434 Sat8CF   | dgreen | na |
| chrX | 22340985 | 22342410 | 1426 Sat8CF   | dgreen | na |
| chrX | 22341590 | 22343020 | 1431 Sat8CF   | dgreen | na |
| chrX | 22342504 | 22343118 | 615 Sat8CF    | dgreen | na |
| chrX | 22346560 | 22346925 | 366 Sat8CF    | dgreen | na |
| chrX | 22346656 | 22346964 | 309 Sat8CF    | dgreen | na |
| chrX | 22346560 | 22346925 | 366 Sat8CF    | dgreen | na |
| chrX | 22346656 | 22346964 | 309 Sat8CF    | dgreen | na |
| chrX | 22346847 | 22346967 | 121 Sat8CF    | dgreen | na |
| chrX | 22347002 | 22348172 | 1171 Sat8CF   | dgreen | na |
| chrX | 22346975 | 22347084 | 110 Sat8CF    | dgreen | na |
| chrX | 22347002 | 22347098 | 97 Sat8CF     | dgreen | na |
| chrX | 22347351 | 22348785 | 1435 Sat8CF   | dgreen | na |
| chrX | 22347002 | 22348172 | 1171 Sat8CF   | dgreen | na |
| chrX | 22348879 | 22350308 | 1430 Sat8CF   | dgreen | na |
| chrX | 22349486 | 22350914 | 1429 Sat8CF   | dgreen | na |
| chrX | 22350702 | 22352133 | 1432 Sat8CF   | dgreen | na |
| chrX | 22351313 | 22352549 | 1237 Sat8CF   | dgreen | na |
| chrX | 22619996 | 22621508 | 1513 Sat142CF | na     | na |
| chrX | 24470549 | 24472496 | 1948 Sat33CF  | na     | na |
| chrX | 24470771 | 24478437 | 7667 Sat33CF  | na     | na |
| chrX | 24477358 | 24478573 | 1216 Sat33CF  | na     | na |
| chrX | 29761213 | 29761882 | 670 Carsat3   | green  | na |
| chrX | 31616754 | 31616939 | 186 HSATII    | na     | na |

|      |          |          |       |          |        |         |
|------|----------|----------|-------|----------|--------|---------|
| chrX | 31616993 | 31617135 | 143   | HSATII   | na     | na      |
| chrX | 34449686 | 34449916 | 231   | Sat18CF  | na     | na      |
| chrX | 40100105 | 40100541 | 437   | Carsat3  | green  | na      |
| chrX | 40100589 | 40101276 | 688   | Carsat3  | green  | na      |
| chrX | 40689029 | 40689086 | 58    | Sat41CF  | na     | na      |
| chrX | 40853988 | 40854421 | 434   | Carsat3  | green  | na      |
| chrX | 40950451 | 40951568 | 1118  | Carsat3  | green  | na      |
| chrX | 40980175 | 40981845 | 1671  | Carsat3  | green  | na      |
| chrX | 41273108 | 41274332 | 1225  | Carsat3  | green  | na      |
| chrX | 41407758 | 41409148 | 1391  | Carsat3  | green  | na      |
| chrX | 41508355 | 41509633 | 1279  | Carsat3  | green  | na      |
| chrX | 41545838 | 41545962 | 125   | Carsat3  | green  | na      |
| chrX | 41546166 | 41546565 | 400   | Carsat3  | green  | na      |
| chrX | 41590671 | 41592119 | 1449  | Carsat3  | green  | na      |
| chrX | 42502420 | 42502493 | 74    | Sat103CF | na     | na      |
| chrX | 44371737 | 44371990 | 254   | Carsat3  | green  | na      |
| chrX | 44372018 | 44372313 | 296   | Carsat3  | green  | na      |
| chrX | 44372437 | 44372643 | 207   | Carsat3  | green  | na      |
| chrX | 44386821 | 44387046 | 226   | Carsat3  | green  | na      |
| chrX | 46428647 | 46428910 | 264   | Sat80CF  | na     | na      |
| chrX | 47579085 | 47579916 | 832   | Carsat2  | orange | pericen |
| chrX | 52461972 | 52462192 | 221   | Sat47CF  | na     | pericen |
| chrX | 52520877 | 52521175 | 299   | Carsat2  | orange | pericen |
| chrX | 52593318 | 52593619 | 302   | Carsat2  | orange | pericen |
| chrX | 52594615 | 52609488 | 14874 | Carsat2  | orange | pericen |
| chrX | 52612607 | 52626642 | 14036 | Carsat2  | orange | pericen |
| chrX | 52626984 | 52650115 | 23132 | Carsat2  | orange | pericen |
| chrX | 52650316 | 52650723 | 408   | Carsat2  | orange | pericen |
| chrX | 52650897 | 52652093 | 1197  | Carsat2  | orange | pericen |
| chrX | 52652260 | 52653483 | 1224  | Carsat2  | orange | pericen |
| chrX | 52653721 | 52654032 | 312   | Carsat2  | orange | pericen |
| chrX | 52654211 | 52655215 | 1005  | Carsat2  | orange | pericen |
| chrX | 56493927 | 56494009 | 83    | Sat135CF | na     | na      |
| chrX | 77081723 | 77081758 | 36    | CarSat1  | red    | na      |
| chrX | 78464513 | 78464751 | 239   | Sat71CF  | na     | na      |
| chrX | 78464615 | 78464872 | 258   | Sat71CF  | na     | na      |
| chrX | 78464722 | 78464937 | 216   | Sat71CF  | na     | na      |
| chrX | 78465046 | 78465208 | 163   | Sat71CF  | na     | na      |
| chrX | 78465082 | 78465562 | 481   | Sat71CF  | na     | na      |
| chrX | 78465191 | 78465904 | 714   | Sat71CF  | na     | na      |
| chrX | 78465312 | 78466296 | 985   | Sat71CF  | na     | na      |
| chrX | 78465551 | 78466566 | 1016  | Sat71CF  | na     | na      |

|      |           |           |               |       |    |
|------|-----------|-----------|---------------|-------|----|
| chrX | 78465821  | 78466806  | 986 Sat71CF   | na    | na |
| chrX | 78466482  | 78467463  | 982 Sat71CF   | na    | na |
| chrX | 78466602  | 78467583  | 982 Sat71CF   | na    | na |
| chrX | 78467203  | 78467676  | 474 Sat71CF   | na    | na |
| chrX | 78467599  | 78467763  | 165 Sat71CF   | na    | na |
| chrX | 79212121  | 79212163  | 43 Sat27CF    | na    | na |
| chrX | 80315649  | 80316758  | 1110 Carsat3  | green | na |
| chrX | 84811303  | 84811369  | 67 Sat107CF   | na    | na |
| chrX | 86720461  | 86720572  | 112 Sat137CF  | na    | na |
| chrX | 87814037  | 87814245  | 209 Sat17CF   | na    | na |
| chrX | 89788243  | 89788298  | 56 Sat14CF    | na    | na |
| chrX | 91127504  | 91127723  | 220 Sat131CF  | na    | na |
| chrX | 91127520  | 91127836  | 317 Sat131CF  | na    | na |
| chrX | 91127863  | 91128436  | 574 Sat120CF  | na    | na |
| chrX | 91128469  | 91128587  | 119 Sat36CF   | na    | na |
| chrX | 91128502  | 91128683  | 182 Sat48CF   | na    | na |
| chrX | 91128522  | 91128683  | 162 Sat31CF   | na    | na |
| chrX | 91128614  | 91128748  | 135 Sat180CF  | na    | na |
| chrX | 95284266  | 95284588  | 323 CarSat1   | red   | na |
| chrX | 96364490  | 96364517  | 28 Sat113CF   | na    | na |
| chrX | 98289388  | 98289468  | 81 CarSat1    | red   | na |
| chrX | 103955387 | 103955475 | 89 Sat36CF    | na    | na |
| chrX | 104164979 | 104165011 | 33 Sat76CF    | na    | na |
| chrX | 105286369 | 105286540 | 172 Sat130CF  | na    | na |
| chrX | 108537437 | 108537659 | 223 Sat17CF   | na    | na |
| chrX | 108898826 | 108899253 | 428 Carsat3   | green | na |
| chrX | 108968420 | 108968997 | 578 Carsat3   | green | na |
| chrX | 110960295 | 110960947 | 653 Sat173CF  | na    | na |
| chrX | 110960432 | 110960991 | 560 Sat173CF  | na    | na |
| chrX | 110960600 | 110960925 | 326 Sat173CF  | na    | na |
| chrX | 113687027 | 113687316 | 290 Sat154CF  | na    | na |
| chrX | 113687380 | 113688400 | 1021 Sat154CF | na    | na |
| chrX | 113688404 | 113688582 | 179 Sat154CF  | na    | na |
| chrX | 114030577 | 114030672 | 96 Sat27CF    | na    | na |
| chrX | 115443513 | 115443552 | 40 CarSat1    | red   | na |
| chrX | 120609408 | 120610859 | 1452 Sat20CF  | na    | na |
| chrX | 120609592 | 120611042 | 1451 Sat20CF  | na    | na |
| chrX | 120610455 | 120611892 | 1438 Sat20CF  | na    | na |
| chrX | 120611193 | 120612626 | 1434 Sat20CF  | na    | na |
| chrX | 120611370 | 120612808 | 1439 Sat20CF  | na    | na |
| chrX | 120611551 | 120612980 | 1430 Sat20CF  | na    | na |
| chrX | 120611793 | 120613227 | 1435 Sat20CF  | na    | na |

|      |           |           |               |    |    |
|------|-----------|-----------|---------------|----|----|
| chrX | 120612547 | 120613328 | 782 Sat20CF   | na | na |
| chrX | 120614899 | 120615227 | 329 Sat20CF   | na | na |
| chrX | 120615198 | 120615232 | 35 Sat20CF    | na | na |
| chrX | 120615298 | 120615478 | 181 Sat20CF   | na | na |
| chrX | 120615318 | 120616756 | 1439 Sat20CF  | na | na |
| chrX | 120615748 | 120617184 | 1437 Sat20CF  | na | na |
| chrX | 120615935 | 120617361 | 1427 Sat20CF  | na | na |
| chrX | 120616609 | 120618031 | 1423 Sat20CF  | na | na |
| chrX | 120617326 | 120618696 | 1371 Sat20CF  | na | na |
| chrX | 120618670 | 120620099 | 1430 Sat20CF  | na | na |
| chrX | 120619091 | 120620524 | 1434 Sat20CF  | na | na |
| chrX | 120619279 | 120620707 | 1429 Sat20CF  | na | na |
| chrX | 120620395 | 120620815 | 421 Sat20CF   | na | na |
| chrX | 120623197 | 120624302 | 1106 Sat20CF  | na | na |
| chrX | 120623549 | 120625026 | 1478 Sat20CF  | na | na |
| chrX | 120624391 | 120625817 | 1427 Sat20CF  | na | na |
| chrX | 120624743 | 120625948 | 1206 Sat20CF  | na | na |
| chrX | 120625598 | 120625994 | 397 Sat20CF   | na | na |
| chrX | 120641246 | 120641535 | 290 Sat11CF   | na | na |
| chrX | 120641587 | 120642126 | 540 Sat11CF   | na | na |
| chrX | 120642611 | 120642769 | 159 Sat11CF   | na | na |
| chrX | 120651822 | 120651956 | 135 Sat11CF   | na | na |
| chrX | 120652007 | 120652131 | 125 Sat11CF   | na | na |
| chrX | 120676176 | 120676433 | 258 Sat11CF   | na | na |
| chrX | 120676269 | 120676423 | 155 Sat11CF   | na | na |
| chrX | 120676905 | 120677584 | 680 Sat11CF   | na | na |
| chrX | 120792818 | 120793496 | 679 Sat11CF   | na | na |
| chrX | 120793985 | 120794257 | 273 Sat11CF   | na | na |
| chrX | 120826154 | 120826327 | 174 Sat11CF   | na | na |
| chrX | 120826167 | 120826836 | 670 Sat11CF   | na | na |
| chrX | 120826666 | 120826824 | 159 Sat11CF   | na | na |
| chrX | 120826880 | 120827049 | 170 Sat11CF   | na | na |
| chrX | 120831101 | 120831188 | 88 Sat11CF    | na | na |
| chrX | 120876493 | 120877045 | 553 Sat11CF   | na | na |
| chrX | 121024167 | 121024337 | 171 Sat11CF   | na | na |
| chrX | 121222496 | 121223174 | 679 Sat11CF   | na | na |
| chrX | 121223245 | 121223784 | 540 Sat11CF   | na | na |
| chrX | 121223836 | 121224077 | 242 Sat11CF   | na | na |
| chrX | 122313328 | 122313433 | 106 Sat80CF   | na | na |
| chrX | 122472164 | 122472272 | 109 SUBTEL_sa | na | na |
| chrX | 122915227 | 122915984 | 758 Sat11CF   | na | na |
| chrX | 122924062 | 122924842 | 781 Sat11CF   | na | na |

|      |           |           |              |        |    |
|------|-----------|-----------|--------------|--------|----|
| chrX | 122924882 | 122925681 | 800 Sat11CF  | na     | na |
| chrX | 123081103 | 123081358 | 256 Sat11CF  | na     | na |
| chrX | 123081828 | 123082612 | 785 Sat11CF  | na     | na |
| chrX | 123081847 | 123082623 | 777 Sat11CF  | na     | na |
| chrX | 123092133 | 123092761 | 629 Sat11CF  | na     | na |
| chrX | 123093475 | 123093599 | 125 Sat11CF  | na     | na |
| chrX | 123093717 | 123093837 | 121 Sat11CF  | na     | na |
| chrX | 123686627 | 123686917 | 291 Sat11CF  | na     | na |
| chrX | 123686969 | 123687716 | 748 Sat11CF  | na     | na |
| chrX | 123687580 | 123687977 | 398 Sat11CF  | na     | na |
| chrX | 123687792 | 123687974 | 183 Sat11CF  | na     | na |
| chrX | 123695653 | 123695914 | 262 Sat11CF  | na     | na |
| chrX | 123696574 | 123697264 | 691 Sat11CF  | na     | na |
| chrX | 123696796 | 123697264 | 469 Sat11CF  | na     | na |
| chrX | 123697345 | 123697796 | 452 Sat11CF  | na     | na |
| chrX | 123829618 | 123829694 | 77 Sat38CF   | na     | na |
| chrX | 124036351 | 124037214 | 864 Carsat3  | green  | na |
| chrX | 124290800 | 124290962 | 163 Carsat3  | green  | na |
| chrX | 124463149 | 124463177 | 29 SUBTEL_sa | na     | na |
| chrX | 125334433 | 125336307 | 1875 Sat31CF | na     | na |
| chrX | 125336933 | 125337032 | 100 Sat31CF  | na     | na |
| chrX | 125337217 | 125339265 | 2049 Sat31CF | na     | na |
| chrX | 125391891 | 125394071 | 2181 Sat48CF | na     | na |
| chrX | 125394303 | 125394494 | 192 Sat48CF  | na     | na |
| chrX | 125416209 | 125419669 | 3461 Sat31CF | na     | na |
| chrX | 125419547 | 125419860 | 314 Sat31CF  | na     | na |
| chrX | 125459987 | 125461482 | 1496 Sat31CF | na     | na |
| chrX | 125493910 | 125494099 | 190 Sat48CF  | na     | na |
| chrX | 125493985 | 125497649 | 3665 Sat31CF | na     | na |
| chrX | 125496353 | 125497800 | 1448 Sat48CF | na     | na |
| chrX | 125551388 | 125552002 | 615 Sat31CF  | na     | na |
| chrX | 125594788 | 125595334 | 547 Sat7CF   | lime   | na |
| chrX | 125930813 | 125931114 | 302 Sat176CF | na     | na |
| chrX | 125930845 | 125931127 | 283 Sat176CF | na     | na |
| chrX | 125931748 | 125932009 | 262 Sat176CF | na     | na |
| chrX | 126313974 | 126314156 | 183 Sat176CF | na     | na |
| chrX | 126823825 | 126823944 | 120 Sat2CF   | purple | na |
| chrX | 126823859 | 126824205 | 347 Sat2CF   | purple | na |
| chrX | 126823897 | 126824209 | 313 Sat2CF   | purple | na |
| chrX | 126880907 | 126882141 | 1235 SAT1_CF | blue   | na |
| chrX | 126882156 | 126883381 | 1226 SAT1_CF | blue   | na |
| chrX | 126883461 | 126883664 | 204 SAT1_CF  | blue   | na |
