# Supplementary material for: Composition and organization of active centromere sequences in complex genomes
Source: PubMed Central journal article supplement (PMC3422206; doi:10.1186/1471-2164-13-324), 2012-07-20
Supplement: 1471-2164-13-324-S6.pdf [file 1471-2164-13-324-S6.pdf]

**Supplemental Table 5. Distribution of Centromeric Transposable Elements within Satellite Reads**

Repeat element representation embedded within each centromeric satellite family, describing relative proportions of each repeat family and overall contribution to array.

| Satellite DNAs |                                         | RepeatMasker-Defined Non-Satellite Sequence Content (bp) |               |               |              |                     |
|----------------|-----------------------------------------|----------------------------------------------------------|---------------|---------------|--------------|---------------------|
| Family         | Satellite DNA Content (bp) <sup>1</sup> | Total                                                    | SINE elements | LINE elements | LTR elements | DNA family elements |
| CarSat1        | 327,474,573                             | 3,135,468                                                | 1,589,720     | 1,080,702     | 441,032      | 24,014              |
| Sat1CF         | 212,545,017                             | 2,331,986                                                | 990,648       | 1,255,325     | 59,159       | 26,854              |
| Sat2CF         | 15,405,544                              | 1,244,757                                                | 107,663       | 1,066,787     | 67,585       | 2722                |
| Sat3CF         | 14,733,077                              | 118,491                                                  | 47,433        | 64,803        | 4206         | 2049                |
| CarSat2        | 5,881,357                               | 396,805                                                  | 158,137       | 226,013       | 10,088       | 2567                |
| Sat4CF         | 1,559,626                               | 49,300                                                   | 23,103        | 19,290        | 5790         | 1117                |
| Sat6CF         | 1,406,032                               | 71,994                                                   | 14,003        | 54,215        | 3017         | 759                 |

<sup>1</sup> From Supplemental Table 1
